# Supplementary material
Source: PubMed Central journal article supplement (PMC3933486)
Supplement: epi-8-1254-s01.pdf [file epi-8-1254-s01.pdf]

## **Supplemental Material to:**

**Scott J Diede, Zizhen Yao, C Chip Keyes, Ashlee E Tyler,  
Joyoti Dey, Christopher S Hackett, Katrina Elsaesser,  
Christopher J Kemp, Paul E Neiman, William A Weiss,  
James M Olson, and Stephen J Tapscott**

**Fundamental differences in promoter CpG island DNA  
hypermethylation between human cancer and genetically  
engineered mouse models of cancer**

**Epigenetics 2013; 8(12)**

**<http://dx.doi.org/10.4161/epi.26486>**

**[http://www.landesbioscience.com/journals/epigenetics/  
article/26486/](http://www.landesbioscience.com/journals/epigenetics/article/26486/)**

## Supplemental Material and Methods

**DAMD assay.** The Denaturation Analysis of Methylation Differences (DAMD) assay was performed and analyzed as previously described.<sup>1</sup> Genomic DNA (2 µg) was used as starting material for the DAMD assay. The sample was evenly split and 1 µg was digested with *KpnI* (10 U) and 1 µg was digested with *SbfI* (10 U) for at least 8 hours in a total volume of 20 µl for each digestion. Enzymes were heat inactivated at 65°C for 20 minutes, digests were combined, and then split between two tubes. To the 20 µl DNA mixture, 27.36 µl of water and 1.64 µl of 3M NaCl were added. Denaturation was performed by boiling samples in a water bath for 7 minutes followed by rapid cooling using an ice-water bath. S1 (Invitrogen, cat# 18001-016) digestion was performed by adding 6 µl 10x S1 nuclease buffer, 4 µl 3M NaCl, and 1 µl of S1 (diluted to 100 U/µl using S1 Dilution buffer). Samples were incubated for 60 minutes at 37°C. S1 was inactivated by extraction with phenol followed by a phenol:chloroform extraction. DNA was ethanol precipitated in the presence of 20 µg of glycogen, and the DNA pellet was resuspended in 80 µl of 1/10 TE. The sample was divided evenly into two tubes, one subjected to digestion with *MseI* (40 U), the other tube with *MspI* (40 U) for at least 4 hours at 37°C (final volume of each digestion was 50 µl). Restriction enzymes were heat inactivated at 65°C for 20 minutes. To generate linkers for ligation-mediated PCR, linkers (*MseI* linker: JW-102g annealed to JW103pcTA; *MspI* linker: JW-102g annealed to JW103pc-2) were annealed in the following manner. Mix 100 µl of 100 pmol/µl of each appropriate primer and add 6.9 µl 3M NaCl and mix. Place in boiling water bath for 7 minutes. Turn off heat, let sit on hot plate >2 hours to cool. Add 20 µl 3M NaOAc, pH 5.2, 400 µl 100% cold EtOH, mix, and place at -20°C for >2 hours. Spin at 4°C for 20 minutes - discard supernatant. Wash with 0.7 ml 70% cold EtOH. Spin at 4°C for 20 minutes - discard supernatant. SpeedVac without heat to dryness. Dissolve DNA in 500 µl water. To the 50 µl restriction digest from previous step: 5 µl of appropriate linker (*MseI* or *MspI* linker), 7 µl 10x T4 DNA Ligase buffer, 7 µl water, and 1 µl T4 DNA ligase (400 U/µl) was added. The sample was incubated at 16°C for 3 hours, and heat inactivated by incubating at 70°C for 20 minutes. Using an Amicon Ultracel-50 (50 kDa cutoff) Membrane 0.5 mL column to remove unligated linkers, 160 µl 1/10 TE and entire ligation mix (70 µl of either *MseI* or *MspI* ligation) from previous step was added. The sample was spun 14,000 x g for 5-10 minutes until volume was concentrated to ~20 µl. DNA was recovered by placing inverted column into new tube and spinning at 1,000 x g for 2 minutes. For PCR amplification: 4 µl template DNA (from above), 10 µl 10x PCR Buffer, 10 µl 2 mM dNTPs, 12 µl Linker specific primer (10 pmol/µl; use either JW-102gMse or JW-102gMsp), 0.8 µl FastStart Taq (Roche, cat# 12032902001), 20 µl 5x GC-rich solution, and 43.2 µl water were combined. Cycling conditions: 96°C 6 minutes, then 30 cycles of: 96°C 30 seconds, 55°C 30 seconds, 72°C 30 seconds; final extension: 72°C for 7 minutes. 1 µl of 100 µl PCR sample was run on an agarose gel for quality control (average size range of *MseI* PCR 300-800 bp; *MspI* PCR 200-600 bp). For PCR clean-up: to Amicon Ultracel-30 (30 kDa cutoff) Membrane 0.5 mL column, 300 µl 1/10 TE and combined *MseI* and *MspI* PCR samples (~198 µl) from previous step were added. The sample was spun 14,000 x g for 20-30 minutes until volume was concentrated to ~20 µl. DNA was recovered by placing inverted column into new tube and spinning at 1,000 x g for 2 minutes. Amplified DNA was quantitated and 7.5 µg of

DNA was fragmented: 44  $\mu$ l DNA (7.5  $\mu$ g total), 5  $\mu$ l 10x DNase I buffer, 1  $\mu$ l DNase I (diluted to 0.017 Units in 1X DNase I buffer) for 35 minutes at 37°C, then heat inactivation at 95°C for 15 minutes. Fragmented DNA was labeled with biotin using the Affymetrix GeneChip Whole-Transcript Double-Stranded Target Kit. Affymetrix Human and Mouse Tiling 1.0R Promoter Arrays were analyzed using Tiling Array Software (v 1.1.02, Affymetrix). Raw data were scaled to a target intensity of 100 and normalized by quantile normalization. For probe analysis, a bandwidth of 250 bp was used and perfect match (PM) probes were used in a Wilcoxon Rank Sum two-sided test. Two independent replicates were used for sample and control. For all experiments, a maximum gap of  $\leq$  100 bp and minimum run of  $>$  30 bp was used to generate signal and  $p$ -value thresholds ( $\log_2(\text{signal ratio}) > 1.2$  and  $p < 0.001$ ). Data were visualized using the Integrated Genome Database Browser (v 5.12, Affymetrix). Mapping of transcription start sites (hg18 and mm9) to DAMD positive chromosomal locations to generate gene lists ( $\pm$  2kb of TSS) was performed using Galaxy.<sup>2,3,4</sup>

**RRBS.** Sample library preparation (EpiQuest) and data analysis for Reduced Representation Bisulfite Sequencing (RRBS) were performed by service provider (Zymo Research) as described.<sup>5,6</sup> EpiQuest libraries were prepared from 200 to 500 ng of mouse or human genomic DNA. The DNA was digested with 60 units of TaqI and 30 units of MspI sequentially. Size-selected TaqI-MspI fragments (40–120bp and 120–350bp) were filled-in and 30-terminal-A extended, extracted with Zymo Research DNA Clean and Concentrator kit (cat# D4003). Ligation to pre-annealed adaptors containing 5-methyl-cytosine instead of cytosine (Illumina) was performed using the Illumina DNA preparation kit and protocol. Purified, adaptor-ligated fragments were bisulfite treated using the EZ DNA Methylation-Direct Kit (Zymo Research, cat# D5020). Preparative-scale PCR was performed and DNA Clean and Concentrator-purified PCR products were subjected to a final size selection on a 4% NuSieve 3:1 agarose gel. SYBR-green-stained gel slices containing adaptor-ligated fragments of 130–210 or 210–460bp in size were excised. Library material was recovered from the gel (Zymoclean Gel DNA Recovery Kit, cat# D4001) and sequenced on an Illumina GAIIx genome analyzer. Sequence reads from bisulfite-treated EpiQuest libraries were identified using standard Illumina base-calling software.

### **Data analysis.**

Alignment and Methylation calls: reads were mapped to human (hg18) and mouse (mm9) genomes using BSMAP (version 2.74), with the option “-q 20 -A AGATCGGAAGAGC” to trim adaptor sequences and low quality base calls.<sup>7</sup> The methylation calls were performed using python script methratio.py in the BSMAP package. CpG statistics: the number of cytosines covered, and the average coverage on covered cytosines for each sample were reported by BSMAP. The average CpG methylation ratios were computed from estimated methylation ratios, weighted by the corresponding coverage. The coverage of a CpG island is computed as the sum of coverage of all contained CpG sites. The methylation ratio for a CpG island was computed as the ratio of the sum of methylation calls for all containing CpG sites against the sum of coverage. The average methylation rate of all CpG islands was weighted by their coverage. Hypo/hypermethylation calls were determined by the

difference of methylation ratios in the given two samples. The pvalue significance was computed by the chi-square test using the number of methylation/non-methylation calls for each sample. Metaplot analysis: to compute a metaplot for a given set of CpG sites, we used a sliding window of 500 bp shifting by 100 bp at each time, and computed the average methylation ratio of all CpG sites within the window that have a minimum coverage of 5 in the given sample. Only the genes containing CpG islands in the given category within +/- 2 kb promoter regions were included in this analysis.

**Bisulfite DNA conversion, PCR, and sequence analysis.** 1 µg of genomic DNA was converted using the EpiTect Bisulfite Kit (Qiagen) per the manufacturer's instructions. 20% of this conversion reaction was used in a PCR reaction using FastStart Taq. Reaction conditions were: 5 µL GC rich solution, 2.5 µL 10x Buffer, 0.3 µL FastStart Taq, 2.5 µL 2.5 mM dNTPs, 4 µL bisulfite converted DNA, 1 µL each 10 µM primer, 8.8 µL dH<sub>2</sub>O with the following cycling conditions: 96°C 6:00 followed by 5 cycles of (96°C 0:45, 50°C 1:30, 72°C 2:00) followed by 30 cycles of (96°C 0:45, 50°C 1:30, 72°C 1:30) with a 7:00 72°C final extension. See **Table S5** for primer sequences. PCR fragments were isolated on 1% agarose in TBE gels and extracted using the QIAquick Gel Extraction Kit (Qiagen, cat# 28704) per the manufacturer's instructions. To elute, 20 µL of buffer EB was used, and 4 µL of eluted product was cloned using the TOPO TA Cloning Kit for Sequencing (Invitrogen, cat# K4575-01) per the manufacturer's instructions. Clones were grown overnight in LB supplemented with 100 µg/mL carbenicillin. DNA was isolated from individual cultures using the QIAprep Miniprep Kit (Qiagen, cat# 27104) per the manufacturer's instructions. DNA was prepared for sequencing using the following protocol. 200 ng plasmid DNA, 2 µL Big Dye Terminator reagent (Invitrogen, cat# 4337449), 1 µL 10 µM m13rev primer, 0.5 µL 50% DMSO, and 4.5 µL H<sub>2</sub>O with the following cycling conditions: 95°C 5:00, and 27 cycles (95°C 0:10, 50°C 0:05, 60°C 4:00). Samples were analyzed by ABI capillary sequencing in the FHCRC shared resources center. Alternatively, the University of Washington High-Throughput Genomics Unit was used. Sample ABI files were analyzed using Sequencher (Gene Codes) and MethTools.<sup>8</sup>

## References for Supplemental Material and Methods

1. Mahoney SE, Yao Z, Keyes CC, Tapscott SJ, Diede SJ. Genome-wide DNA methylation studies suggest distinct DNA methylation patterns in pediatric embryonal and alveolar rhabdomyosarcomas. *Epigenetics* 2012; 7:400-8.
2. Blankenberg D, Von Kuster G, Coraor N, Ananda G, Lazarus R, Mangan M, et al. Galaxy: a web-based genome analysis tool for experimentalists. *Current protocols in molecular biology* / edited by Frederick M Ausubel [et al] 2010; Chapter 19:Unit 19.0.1-21.
3. Giardine B, Riemer C, Hardison RC, Burhans R, Elnitski L, Shah P, et al. Galaxy: a platform for interactive large-scale genome analysis. *Genome Research* 2005; 15:1451-5.

4. Goecks J, Nekrutenko A, Taylor J, Team G. Galaxy: a comprehensive approach for supporting accessible, reproducible, and transparent computational research in the life sciences. *Genome Biology* 2010; 11:R86.
5. Gu H, Smith ZD, Bock C, Boyle P, Gnirke A, Meissner A. Preparation of reduced representation bisulfite sequencing libraries for genome-scale DNA methylation profiling. *Nature Protocols* 2011; 6:468-81.
6. Vicente-Dueñas C, Romero-Camarero I, González-Herrero I, Alonso-Escudero E, Abollo-Jiménez F, Jiang X, et al. A novel molecular mechanism involved in multiple myeloma development revealed by targeting MafB to haematopoietic progenitors. *The EMBO journal* 2012; 31:3704-17.
7. Xi Y, Li W. BSMAP: whole genome bisulfite sequence MAPping program. *BMC Bioinformatics* 2009; 10:232.
8. Grunau C, Schattevoy R, Mache N, Rosenthal A. MethTools--a toolbox to visualize and analyze DNA methylation data. *Nucleic Acids Research* 2000; 28:1053-8.

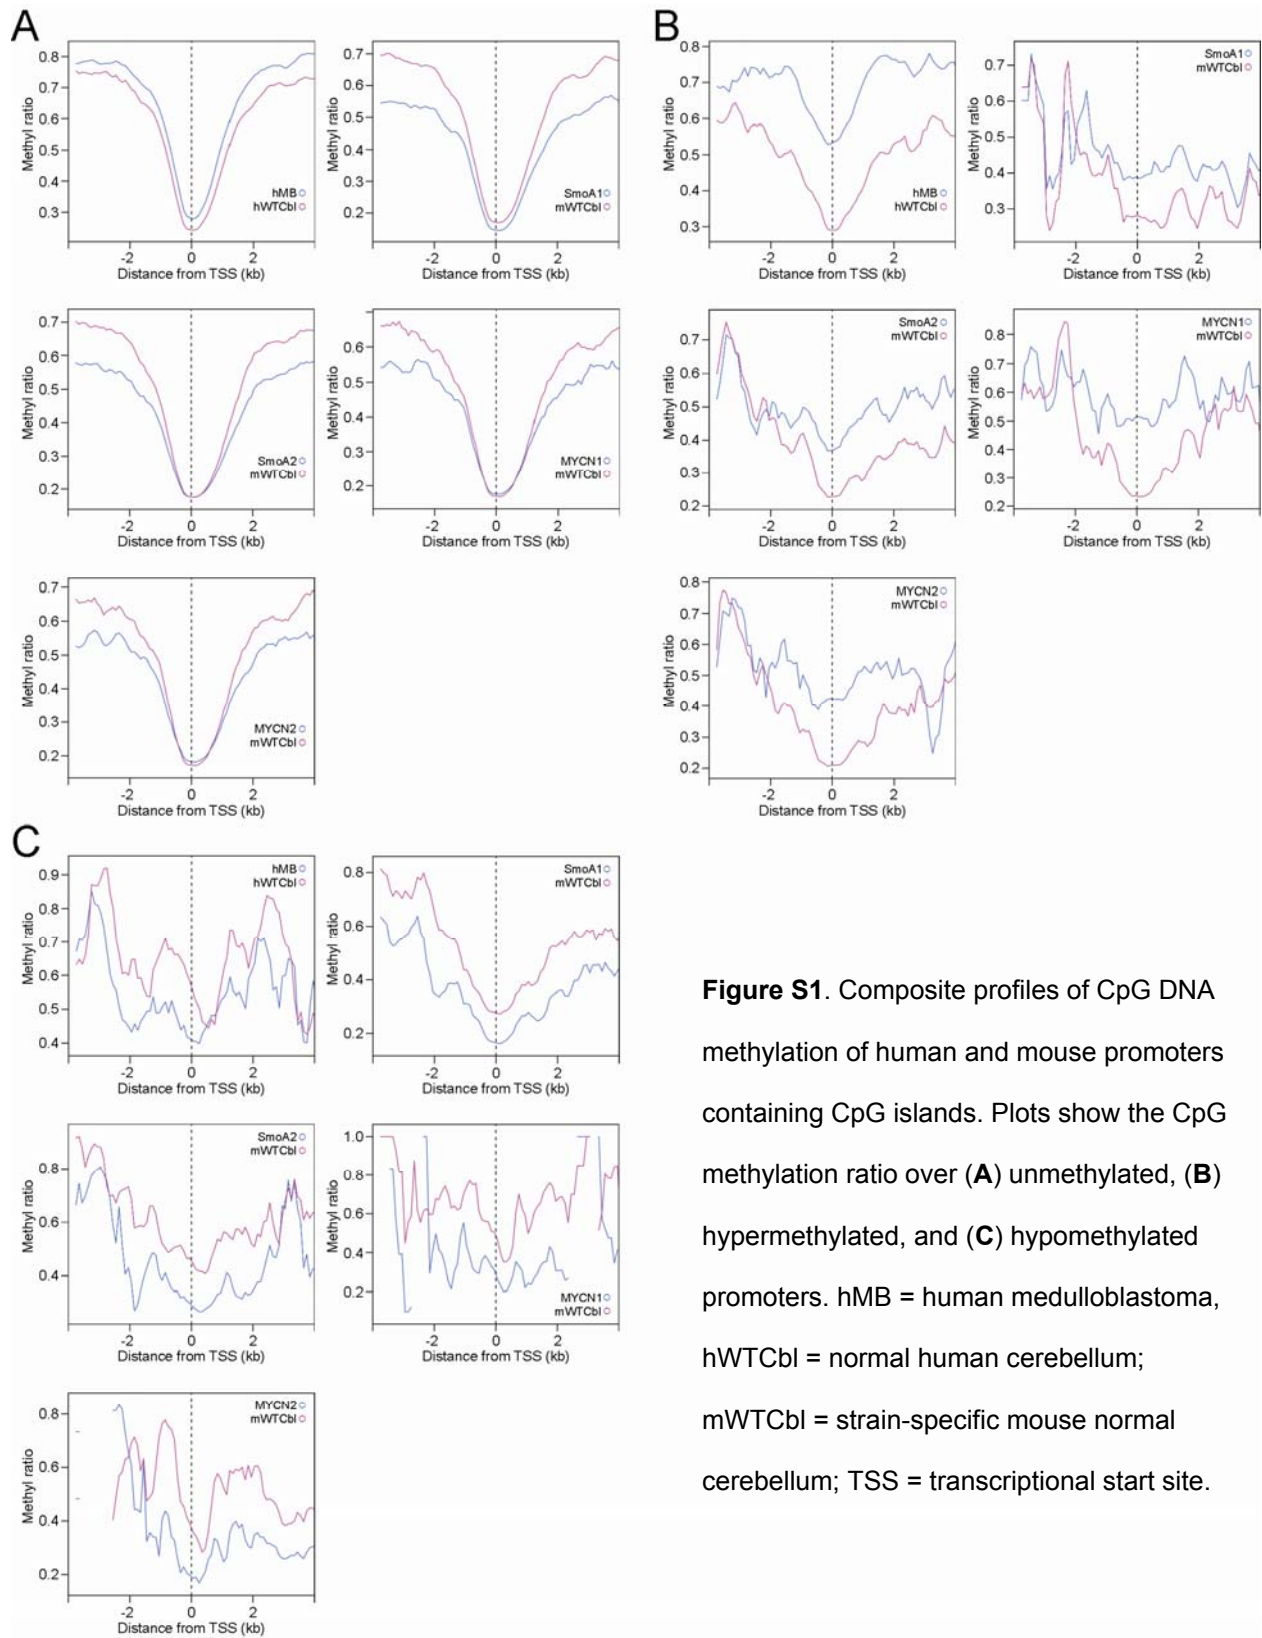

**Figure S1.** Composite profiles of CpG DNA methylation of human and mouse promoters containing CpG islands. Plots show the CpG methylation ratio over (A) unmethylated, (B) hypermethylated, and (C) hypomethylated promoters. hMB = human medulloblastoma, hWTCbl = normal human cerebellum; mWTCbl = strain-specific mouse normal cerebellum; TSS = transcriptional start site.

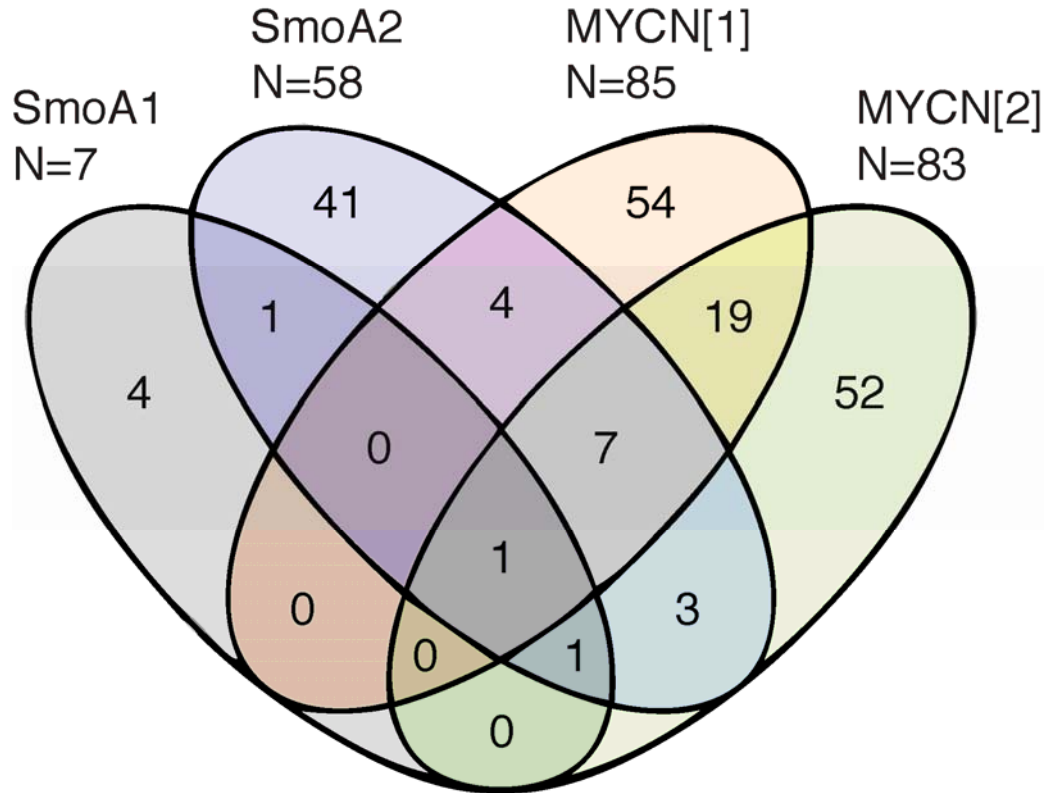

**Figure S2.** Common hypermethylated loci in mouse models of medulloblastoma. Common RRBS loci demonstrating >33% methylation (tumor compared to normal cerebellum) from SmoA1, SmoA2, and two individual MYCN-driven tumors (labeled MYCN[1] and MYCN[2]) are depicted on the Venn diagram.

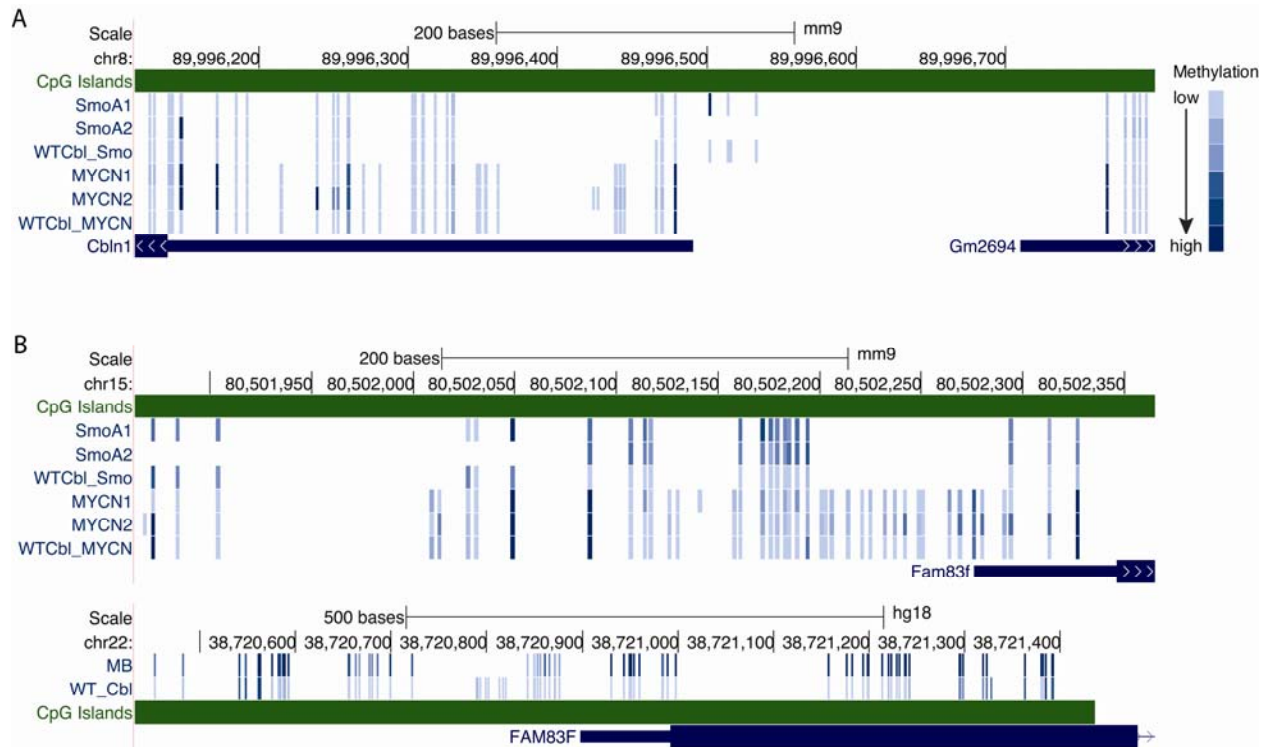

**Figure S3.** Modest promoter CpG island DNA methylation in mouse models of medulloblastoma. CpG DNA methylation tracks from the UCSC genome browser are depicted from SmoA1, SmoA2, and MYCN (independent animals [1] and [2]) tumors, and matched normal cerebellum from each mouse strain (labeled as WTCbl\_Smo and WTCbl\_MYCN); the human medulloblastoma patient sample (MB) and normal human cerebellum (WT\_Cbl) are also shown. The track shows the mean DNA methylation level of each CpG. Darker shades of blue correspond to higher methylation levels. The CpG island is depicted as a green rectangle, and a gene's mRNA structure (exon, thick rectangle; UTR, thin rectangle; intron, thin line; arrow, direction of transcription) is shown in blue. RRBS DNA methylation levels are shown from (A) the shared promoter CpG island of the mouse *Cbln1-Gm2694* genes and (B) the mouse *Fam83f* and human *FAM83F* genes.



**Table S1.** RRBS data for promoter CpG islands in human medulloblastoma compared to normal cerebellum.

Methylation status for statistically significant ( $p < 1E-09$ ) promoter CpG islands ( $\pm$  2kb from TSS) are shown.

Methylation status is annotated with respect to tumor compared to normal control: hyper1 = 1-32% hypermethylation; hyper2 = 33-59% hypermethylation; hyper3 = >60% hypermethylation; hypo1 = 1-32% hypomethylation; hypo2 = 33-59%

| chr  | start     | end       | gene_name     | gene_id         | dist  | hMB.ratio | hWTCbl.ratio | pval     | diff | anno   |
|------|-----------|-----------|---------------|-----------------|-------|-----------|--------------|----------|------|--------|
| chr1 | 3566445   | 3569636   | WRAP73        | ENSG00000116213 | -1450 | 0.5       | 0.23         | 1.10E-30 | 0.27 | hyper1 |
| chr1 | 110610265 | 110613303 | ALX3          | ENSG00000156150 | 1450  | 0.64      | 0.37         | 1.70E-30 | 0.27 | hyper1 |
| chr1 | 148901724 | 148903203 | RP11-14N7.1   | ENSG00000175658 | 720   | 0.45      | 0.23         | 2.80E-23 | 0.22 | hyper1 |
| chr1 | 111216244 | 111217937 | KCNA3         | ENSG00000177272 | 565   | 0.51      | 0.19         | 3.80E-22 | 0.32 | hyper1 |
| chr1 | 1167001   | 1168985   | SDF4          | ENSG00000078808 | -645  | 0.71      | 0.41         | 3.90E-21 | 0.3  | hyper1 |
| chr1 | 9099280   | 9100513   | SLC2A5        | ENSG00000142583 | 58    | 0.71      | 0.39         | 5.70E-21 | 0.33 | hyper1 |
| chr1 | 92945907  | 92952609  | GFI1          | ENSG00000162676 | 253   | 0.39      | 0.2          | 2.30E-19 | 0.19 | hyper1 |
| chr1 | 200842196 | 200843388 | GPR25         | ENSG00000170128 | 709   | 0.62      | 0.37         | 3.80E-17 | 0.25 | hyper1 |
| chr1 | 145075483 | 145075845 | PDE4DIP       | ENSG00000178104 | 227   | 0.27      | 0.12         | 4.50E-17 | 0.16 | hyper1 |
| chr1 | 59042013  | 59043295  | TACSTD2       | ENSG00000184292 | 512   | 0.48      | 0.22         | 2.30E-16 | 0.26 | hyper1 |
| chr1 | 2136808   | 2137351   | C1orf86       | ENSG00000162585 | -1758 | 0.67      | 0.39         | 1.70E-15 | 0.28 | hyper1 |
| chr1 | 201252452 | 201253648 | PKP1          | ENSG00000081277 | 470   | 0.97      | 0.69         | 1.80E-15 | 0.28 | hyper1 |
| chr1 | 2983925   | 2987962   | RP1-163G9.1   | ENSG00000177133 | -1610 | 0.41      | 0.27         | 1.40E-12 | 0.14 | hyper1 |
| chr1 | 156863415 | 156863711 | PEAR1         | ENSG00000187800 | 73    | 0.72      | 0.4          | 1.70E-12 | 0.32 | hyper1 |
| chr1 | 1981251   | 1983212   | RP11-547D24.3 | ENSG00000226969 | -722  | 0.33      | 0.16         | 7.10E-12 | 0.17 | hyper1 |
| chr1 | 12676983  | 12678642  | DHRS3         | ENSG00000162496 | -75   | 0.47      | 0.26         | 1.50E-11 | 0.21 | hyper1 |
| chr1 | 16973485  | 16975045  | AL137798.3    | ENSG00000256048 | 1632  | 0.77      | 0.54         | 3.00E-11 | 0.23 | hyper1 |
| chr1 | 227748423 | 227748860 | 5S_rRNA       | ENSG00000202264 | -241  | 0.55      | 0.25         | 5.00E-11 | 0.3  | hyper1 |
| chr1 | 65468272  | 65468828  | RP11-182I10.3 | ENSG00000226891 | -391  | 0.44      | 0.17         | 6.30E-11 | 0.27 | hyper1 |
| chr1 | 1242400   | 1245185   | ACAP3         | ENSG00000131584 | -594  | 0.29      | 0.16         | 1.90E-10 | 0.13 | hyper1 |
| chr1 | 11708767  | 11709277  | FBXO2         | ENSG00000116661 | 1748  | 0.97      | 0.69         | 1.90E-10 | 0.28 | hyper1 |
| chr1 | 205600493 | 205601432 | ELK4          | ENSG00000158711 | 59    | 0.41      | 0.16         | 2.00E-10 | 0.25 | hyper1 |
| chr1 | 40769186  | 40769871  | COL9A2        | ENSG00000049089 | 645   | 0.94      | 0.67         | 7.20E-10 | 0.26 | hyper1 |

|       |           |           |                |                 |       |      |      |          |      |        |
|-------|-----------|-----------|----------------|-----------------|-------|------|------|----------|------|--------|
| chr1  | 1163502   | 1163895   | SDF4           | ENSG00000078808 | 278   | 1    | 0.76 | 9.90E-10 | 0.24 | hyper1 |
| chr10 | 77155128  | 77169600  | AC010997.1     | ENSG00000233745 | 1605  | 0.48 | 0.32 | 1.50E-41 | 0.16 | hyper1 |
| chr10 | 46969991  | 46971557  | SYT15          | ENSG00000204176 | -290  | 0.43 | 0.17 | 1.30E-24 | 0.26 | hyper1 |
| chr10 | 8091374   | 8098329   | RP11-379F12.4  | ENSG00000232638 | 1347  | 0.44 | 0.25 | 1.90E-24 | 0.19 | hyper1 |
| chr10 | 16561604  | 16563822  | C1QL3          | ENSG00000165985 | 351   | 0.46 | 0.22 | 8.90E-24 | 0.24 | hyper1 |
| chr10 | 128593609 | 128595048 | DOCK1          | ENSG00000150760 | 350   | 0.55 | 0.24 | 4.00E-22 | 0.31 | hyper1 |
| chr10 | 95360389  | 95361387  | RBP4           | ENSG00000138207 | -402  | 0.47 | 0.18 | 1.00E-19 | 0.29 | hyper1 |
| chr10 | 118030732 | 118034230 | GFRA1          | ENSG00000151892 | -687  | 0.4  | 0.19 | 4.70E-18 | 0.2  | hyper1 |
| chr10 | 119301321 | 119305368 | EMX2OS         | ENSG00000229847 | -1514 | 0.34 | 0.16 | 2.80E-17 | 0.18 | hyper1 |
| chr10 | 125650820 | 125651373 | CPXM2          | ENSG00000121898 | 178   | 0.62 | 0.29 | 3.30E-17 | 0.33 | hyper1 |
| chr10 | 101089010 | 101090655 | CNNM1          | ENSG00000119946 | 687   | 0.54 | 0.22 | 2.50E-16 | 0.32 | hyper1 |
| chr10 | 121410566 | 121411827 | BAG3           | ENSG00000151929 | 314   | 0.4  | 0.17 | 7.70E-15 | 0.23 | hyper1 |
| chr10 | 135341255 | 135342561 | CYP2E1         | ENSG00000130649 | 325   | 0.64 | 0.34 | 1.30E-13 | 0.3  | hyper1 |
| chr10 | 49658224  | 49659201  | ARHGAP22       | ENSG00000128805 | 958   | 0.85 | 0.55 | 3.20E-13 | 0.3  | hyper1 |
| chr10 | 35928501  | 35931893  | FZD8           | ENSG00000177283 | 165   | 0.35 | 0.2  | 5.30E-12 | 0.16 | hyper1 |
| chr10 | 75492493  | 75493422  | RP11-574K11.20 | ENSG00000235316 | 1375  | 0.9  | 0.69 | 7.20E-11 | 0.21 | hyper1 |
| chr10 | 92616820  | 92618034  | HTR7           | ENSG00000148680 | 1     | 0.35 | 0.17 | 7.30E-10 | 0.18 | hyper1 |
| chr11 | 17756056  | 17758286  | KCNC1          | ENSG00000129159 | 812   | 0.5  | 0.19 | 1.20E-40 | 0.31 | hyper1 |
| chr11 | 94276894  | 94278913  | PIWIL4         | ENSG00000134627 | 897   | 0.65 | 0.32 | 6.60E-38 | 0.32 | hyper1 |
| chr11 | 75479462  | 75480172  | DGAT2          | ENSG00000062282 | 241   | 0.22 | 0.07 | 5.80E-30 | 0.15 | hyper1 |
| chr11 | 65305935  | 65308502  | LTBP3          | ENSG00000168056 | 705   | 0.73 | 0.52 | 1.60E-22 | 0.22 | hyper1 |
| chr11 | 73073118  | 73073733  | ARHGEF17       | ENSG00000110237 | -1834 | 0.94 | 0.71 | 1.30E-16 | 0.23 | hyper1 |
| chr11 | 32454874  | 32457311  | WT1            | ENSG00000184937 | 799   | 0.46 | 0.19 | 3.70E-16 | 0.27 | hyper1 |
| chr11 | 64136814  | 64138187  | MIR1237        | ENSG00000221273 | 1426  | 0.94 | 0.71 | 7.40E-16 | 0.24 | hyper1 |
| chr11 | 47586848  | 47587608  | NDUFS3         | ENSG00000213619 | 340   | 0.42 | 0.14 | 9.20E-15 | 0.28 | hyper1 |
| chr11 | 66623620  | 66626614  | LRFN4          | ENSG00000173621 | 999   | 0.66 | 0.47 | 1.50E-14 | 0.19 | hyper1 |
| chr11 | 6650905   | 6652079   | RP11-732A19.6  | ENSG00000255410 | -342  | 0.97 | 0.81 | 3.30E-14 | 0.16 | hyper1 |
| chr11 | 118478235 | 118481896 | PHLDB1         | ENSG00000019144 | 1759  | 0.65 | 0.44 | 8.90E-14 | 0.21 | hyper1 |
| chr11 | 614760    | 616068    | IRF7           | ENSG00000185507 | -527  | 0.48 | 0.26 | 1.80E-13 | 0.22 | hyper1 |
| chr11 | 55640068  | 55641085  | RP11-738O11.13 | ENSG00000254547 | 1437  | 0.66 | 0.39 | 2.00E-13 | 0.28 | hyper1 |

|       |           |           |               |                 |       |      |      |          |       |        |
|-------|-----------|-----------|---------------|-----------------|-------|------|------|----------|-------|--------|
| chr11 | 65359292  | 65360328  | EHBP1L1       | ENSG00000173442 | 517   | 0.94 | 0.74 | 1.60E-12 | 0.2   | hyper1 |
| chr11 | 67770426  | 67771629  | UNC93B1       | ENSG00000110057 | -88   | 0.4  | 0.16 | 3.10E-11 | 0.24  | hyper1 |
| chr11 | 19262473  | 19264397  | E2F8          | ENSG00000129173 | -937  | 0.32 | 0.16 | 1.80E-10 | 0.16  | hyper1 |
| chr11 | 68517667  | 68518179  | MTL5          | ENSG00000132749 | -190  | 0.79 | 0.51 | 7.20E-10 | 0.28  | hyper1 |
| chr11 | 61582573  | 61584728  | FADS1         | ENSG00000149485 | -1067 | 0.32 | 0.15 | 7.50E-10 | 0.16  | hyper1 |
| chr12 | 6882855   | 6883184   | LAG3          | ENSG00000089692 | 1333  | 0.84 | 0.52 | 2.00E-17 | 0.32  | hyper1 |
| chr12 | 125670117 | 125672112 | TMEM132B      | ENSG00000139364 | -268  | 0.41 | 0.2  | 4.60E-17 | 0.21  | hyper1 |
| chr12 | 30353915  | 30354612  | RP11-776A13.1 | ENSG00000257262 | 347   | 0.47 | 0.15 | 1.20E-15 | 0.33  | hyper1 |
| chr12 | 111855896 | 111856750 | SH2B3         | ENSG00000111252 | 410   | 0.98 | 0.8  | 1.70E-14 | 0.18  | hyper1 |
| chr12 | 104697348 | 104697984 | EID3          | ENSG00000255150 | 149   | 0.59 | 0.26 | 4.20E-14 | 0.33  | hyper1 |
| chr12 | 54427025  | 54428709  | MIR615        | ENSG00000207571 | 133   | 0.62 | 0.37 | 1.40E-13 | 0.24  | hyper1 |
| chr12 | 122230903 | 122232359 | RHOF          | ENSG00000139725 | -365  | 0.42 | 0.2  | 8.20E-13 | 0.23  | hyper1 |
| chr12 | 99288222  | 99289374  | ANKS1B        | ENSG00000185046 | -252  | 0.42 | 0.13 | 4.40E-12 | 0.28  | hyper1 |
| chr12 | 5018585   | 5021171   | KCNA1         | ENSG00000111262 | 805   | 0.42 | 0.24 | 2.00E-11 | 0.17  | hyper1 |
| chr12 | 45444202  | 45445386  | RP11-478B9.1  | ENSG00000257319 | 110   | 0.37 | 0.16 | 9.20E-11 | 0.21  | hyper1 |
| chr12 | 3186011   | 3186968   | TSPAN9        | ENSG00000011105 | -32   | 0.43 | 0.15 | 2.00E-10 | 0.28  | hyper1 |
| chr12 | 58148888  | 58149781  | 41342         | ENSG00000139266 | -177  | 0.37 | 0.18 | 2.70E-10 | 0.19  | hyper1 |
| chr12 | 54424610  | 54425173  | HOXC5         | ENSG00000172789 | -1746 | 0.49 | 0.24 | 4.50E-10 | 0.25  | hyper1 |
| chr13 | 37493896  | 37494752  | SMAD9         | ENSG00000120693 | 51    | 0.98 | 0.93 | 8.80E-31 | 0.055 | hyper1 |
| chr13 | 100608122 | 100609686 | AL137139.2    | ENSG00000255768 | 497   | 0.55 | 0.22 | 4.90E-22 | 0.33  | hyper1 |
| chr13 | 110434466 | 110440180 | IRS2          | ENSG00000185950 | 1592  | 0.62 | 0.43 | 5.50E-22 | 0.19  | hyper1 |
| chr13 | 112720564 | 112723582 | SOX1          | ENSG00000182968 | 160   | 0.38 | 0.16 | 1.40E-20 | 0.21  | hyper1 |
| chr13 | 25319668  | 25322255  | IRX1P1        | ENSG00000231417 | 1556  | 0.5  | 0.23 | 6.30E-17 | 0.27  | hyper1 |
| chr13 | 41238500  | 41241750  | FOXO1         | ENSG00000150907 | 609   | 0.38 | 0.21 | 2.60E-12 | 0.17  | hyper1 |
| chr13 | 114565807 | 114567206 | GAS6          | ENSG00000183087 | 482   | 0.62 | 0.32 | 5.00E-12 | 0.3   | hyper1 |
| chr13 | 51417371  | 51418149  | DLEU7         | ENSG00000186047 | 72    | 0.55 | 0.23 | 6.50E-12 | 0.32  | hyper1 |
| chr13 | 30168901  | 30170246  | SLC7A1        | ENSG00000139514 | 148   | 0.38 | 0.17 | 2.90E-11 | 0.21  | hyper1 |
| chr13 | 31480272  | 31481105  | C13orf33      | ENSG00000102802 | 360   | 0.49 | 0.28 | 5.50E-11 | 0.21  | hyper1 |
| chr13 | 53419897  | 53422872  | PCDH8         | ENSG00000136099 | 1256  | 0.29 | 0.17 | 2.00E-10 | 0.12  | hyper1 |
| chr14 | 38724254  | 38725537  | CLEC14A       | ENSG00000176435 | -371  | 0.46 | 0.22 | 9.90E-22 | 0.25  | hyper1 |

|       |           |           |            |                 |       |      |      |          |      |        |
|-------|-----------|-----------|------------|-----------------|-------|------|------|----------|------|--------|
| chr14 | 24779874  | 24780932  | CIDEB      | ENSG00000136305 | 173   | 0.53 | 0.24 | 2.50E-19 | 0.29 | hyper1 |
| chr14 | 65006874  | 65009197  | HSPA2      | ENSG00000126803 | 849   | 0.49 | 0.24 | 3.40E-19 | 0.25 | hyper1 |
| chr14 | 105714491 | 105716325 | BTBD6      | ENSG00000184887 | 581   | 0.53 | 0.27 | 7.40E-15 | 0.27 | hyper1 |
| chr14 | 89882421  | 89884278  | FOXN3      | ENSG00000053254 | 105   | 0.26 | 0.12 | 7.70E-15 | 0.14 | hyper1 |
| chr14 | 33402094  | 33404079  | NPAS3      | ENSG00000151322 | -1053 | 0.51 | 0.19 | 5.50E-14 | 0.32 | hyper1 |
| chr15 | 89920793  | 89922768  | AC133637.1 | ENSG00000255571 | 507   | 0.88 | 0.58 | 1.70E-36 | 0.3  | hyper1 |
| chr15 | 102028860 | 102030608 | PCSK6      | ENSG00000140479 | 139   | 0.5  | 0.17 | 8.90E-26 | 0.32 | hyper1 |
| chr15 | 53080458  | 53083699  | ONECUT1    | ENSG00000169856 | 131   | 0.52 | 0.25 | 2.50E-19 | 0.27 | hyper1 |
| chr15 | 101419261 | 101421133 | ALDH1A3    | ENSG00000184254 | 616   | 0.69 | 0.44 | 1.60E-17 | 0.25 | hyper1 |
| chr15 | 41785616  | 41788539  | ITPKA      | ENSG00000137825 | 1018  | 0.6  | 0.4  | 3.00E-17 | 0.2  | hyper1 |
| chr15 | 74419870  | 74423044  | AC010931.2 | ENSG00000248540 | 162   | 0.55 | 0.27 | 1.10E-16 | 0.28 | hyper1 |
| chr15 | 81292793  | 81295609  | MESDC1     | ENSG00000140406 | 906   | 0.39 | 0.19 | 4.90E-15 | 0.2  | hyper1 |
| chr15 | 64454890  | 64455577  | PPIB       | ENSG00000166794 | 171   | 0.42 | 0.15 | 8.60E-13 | 0.27 | hyper1 |
| chr15 | 41803443  | 41805531  | LTK        | ENSG00000062524 | 1571  | 0.36 | 0.21 | 9.50E-12 | 0.16 | hyper1 |
| chr15 | 31683984  | 31685824  | AC104759.1 | ENSG00000246638 | -142  | 0.57 | 0.26 | 2.60E-10 | 0.31 | hyper1 |
| chr16 | 67196792  | 67199988  | HSF4       | ENSG00000102878 | 1102  | 0.58 | 0.28 | 1.20E-32 | 0.3  | hyper1 |
| chr16 | 3016646   | 3020326   | PAQR4      | ENSG00000162073 | -760  | 0.6  | 0.32 | 9.90E-32 | 0.28 | hyper1 |
| chr16 | 10273943  | 10277424  | GRIN2A     | ENSG00000183454 | -1415 | 0.46 | 0.2  | 1.20E-31 | 0.26 | hyper1 |
| chr16 | 4664006   | 4666782   | FAM100A    | ENSG00000153443 | -467  | 0.53 | 0.23 | 7.10E-27 | 0.3  | hyper1 |
| chr16 | 51183699  | 51188763  | SALL1      | ENSG00000103449 | -1723 | 0.46 | 0.25 | 1.90E-21 | 0.21 | hyper1 |
| chr16 | 2157862   | 2162139   | PKD1       | ENSG00000008710 | -1983 | 0.91 | 0.62 | 5.20E-21 | 0.29 | hyper1 |
| chr16 | 770620    | 772158    | FAM173A    | ENSG00000103254 | 231   | 0.54 | 0.27 | 1.80E-18 | 0.27 | hyper1 |
| chr16 | 55689598  | 55690895  | SLC6A2     | ENSG00000103546 | -106  | 0.47 | 0.16 | 5.60E-16 | 0.31 | hyper1 |
| chr16 | 2028987   | 2030710   | NOXO1      | ENSG00000196408 | 1336  | 0.64 | 0.34 | 5.00E-15 | 0.3  | hyper1 |
| chr16 | 3930648   | 3931651   | CREBBP     | ENSG00000005339 | -427  | 0.5  | 0.23 | 4.10E-13 | 0.28 | hyper1 |
| chr16 | 776636    | 779417    | CCDC78     | ENSG00000162004 | -1180 | 0.43 | 0.25 | 7.20E-13 | 0.18 | hyper1 |
| chr16 | 324797    | 326177    | RGS11      | ENSG00000076344 | -531  | 0.54 | 0.22 | 1.10E-12 | 0.31 | hyper1 |
| chr16 | 66612749  | 66613412  | CMTM2      | ENSG00000140932 | -271  | 0.57 | 0.3  | 2.70E-11 | 0.27 | hyper1 |
| chr16 | 31119557  | 31120744  | BCKDK      | ENSG00000103507 | 535   | 0.51 | 0.28 | 8.10E-11 | 0.23 | hyper1 |
| chr16 | 12008880  | 12010114  | GSPT1      | ENSG00000103342 | 328   | 0.34 | 0.14 | 6.30E-10 | 0.21 | hyper1 |

|       |          |          |               |                 |       |      |      |          |      |        |
|-------|----------|----------|---------------|-----------------|-------|------|------|----------|------|--------|
| chr17 | 76354818 | 76357038 | SOCS3         | ENSG00000184557 | 230   | 0.49 | 0.17 | 1.30E-46 | 0.32 | hyper1 |
| chr17 | 59528979 | 59530266 | TBX4          | ENSG00000121075 | -157  | 0.51 | 0.23 | 5.00E-26 | 0.28 | hyper1 |
| chr17 | 70116274 | 70119998 | AC005152.2    | ENSG00000234899 | -1202 | 0.46 | 0.23 | 1.60E-24 | 0.22 | hyper1 |
| chr17 | 11143487 | 11145416 | SHISA6        | ENSG00000188803 | -129  | 0.47 | 0.24 | 7.70E-23 | 0.22 | hyper1 |
| chr17 | 42082027 | 42084972 | NAGS          | ENSG00000161653 | 1468  | 0.42 | 0.18 | 1.50E-22 | 0.24 | hyper1 |
| chr17 | 58498711 | 58499332 | C17orf64      | ENSG00000141371 | -82   | 0.46 | 0.18 | 1.80E-16 | 0.28 | hyper1 |
| chr17 | 80022655 | 80024178 | DUS1L         | ENSG00000169718 | -640  | 0.48 | 0.27 | 5.20E-14 | 0.21 | hyper1 |
| chr17 | 45500780 | 45501707 | CTD-2026D20.2 | ENSG00000253347 | -351  | 0.39 | 0.19 | 2.40E-12 | 0.21 | hyper1 |
| chr17 | 46627787 | 46628444 | RP11-357H14.7 | ENSG00000233101 | 868   | 0.46 | 0.24 | 2.70E-11 | 0.22 | hyper1 |
| chr17 | 48545570 | 48546900 | ACSF2         | ENSG00000167107 | 545   | 0.41 | 0.22 | 6.70E-11 | 0.18 | hyper1 |
| chr17 | 7905927  | 7907445  | GUCY2D        | ENSG00000132518 | 698   | 0.48 | 0.3  | 1.40E-10 | 0.18 | hyper1 |
| chr17 | 5403131  | 5404602  | AC055839.1    | ENSG00000170233 | 599   | 0.41 | 0.18 | 2.30E-10 | 0.23 | hyper1 |
| chr17 | 74533281 | 74534566 | CYGB          | ENSG00000161544 | -141  | 0.35 | 0.15 | 3.20E-10 | 0.2  | hyper1 |
| chr17 | 27893086 | 27896078 | ABHD15        | ENSG00000168792 | -540  | 0.38 | 0.24 | 4.20E-10 | 0.14 | hyper1 |
| chr17 | 20798957 | 20800112 | CCDC144NL     | ENSG00000205212 | -81   | 0.91 | 0.69 | 6.30E-10 | 0.22 | hyper1 |
| chr18 | 77153292 | 77160759 | NFATC1        | ENSG00000131196 | 1253  | 0.37 | 0.24 | 7.10E-17 | 0.13 | hyper1 |
| chr18 | 47794450 | 47794996 | CCDC11        | ENSG00000172361 | -1858 | 0.95 | 0.64 | 1.50E-16 | 0.31 | hyper1 |
| chr18 | 33766391 | 33768145 | MOCOS         | ENSG00000075643 | -214  | 0.5  | 0.27 | 4.20E-15 | 0.22 | hyper1 |
| chr18 | 24126780 | 24131138 | KCTD1         | ENSG00000134504 | -459  | 0.34 | 0.19 | 1.50E-14 | 0.15 | hyper1 |
| chr18 | 8608763  | 8610370  | RAB12         | ENSG00000206418 | 123   | 0.44 | 0.28 | 3.70E-11 | 0.16 | hyper1 |
| chr18 | 74843360 | 74845426 | MBP           | ENSG00000197971 | -753  | 0.36 | 0.21 | 2.80E-10 | 0.15 | hyper1 |
| chr19 | 51169659 | 51172023 | SHANK1        | ENSG00000161681 | -851  | 0.87 | 0.55 | 3.70E-54 | 0.32 | hyper1 |
| chr19 | 2424005  | 2427983  | TIMM13        | ENSG00000099800 | 1881  | 0.53 | 0.31 | 1.10E-32 | 0.23 | hyper1 |
| chr19 | 58867397 | 58868868 | ZNF497        | ENSG00000174586 | 404   | 0.91 | 0.66 | 3.80E-30 | 0.25 | hyper1 |
| chr19 | 16435202 | 16438064 | KLF2          | ENSG00000127528 | 982   | 0.57 | 0.33 | 1.20E-26 | 0.23 | hyper1 |
| chr19 | 3576628  | 3578314  | HMG20B        | ENSG00000064961 | 588   | 0.83 | 0.58 | 6.20E-26 | 0.24 | hyper1 |
| chr19 | 57175061 | 57176407 | ZNF835        | ENSG00000127903 | 1096  | 0.96 | 0.77 | 7.40E-24 | 0.19 | hyper1 |
| chr19 | 38876614 | 38878950 | GGN           | ENSG00000179168 | 119   | 0.84 | 0.58 | 3.50E-23 | 0.26 | hyper1 |
| chr19 | 56163662 | 56167257 | U2AF2         | ENSG00000063244 | 43    | 0.65 | 0.45 | 2.20E-17 | 0.2  | hyper1 |
| chr19 | 55992577 | 55996916 | NAT14         | ENSG00000090971 | -1848 | 0.71 | 0.54 | 7.90E-15 | 0.16 | hyper1 |

|       |           |           |              |                 |       |      |      |          |      |        |
|-------|-----------|-----------|--------------|-----------------|-------|------|------|----------|------|--------|
| chr19 | 2226193   | 2228342   | DOT1L        | ENSG00000104885 | 351   | 0.91 | 0.74 | 3.60E-14 | 0.17 | hyper1 |
| chr19 | 41119031  | 41120394  | LTBP4        | ENSG00000090006 | 210   | 0.94 | 0.77 | 9.40E-13 | 0.17 | hyper1 |
| chr19 | 14551998  | 14552255  | PKN1         | ENSG00000123143 | 1054  | 0.93 | 0.61 | 4.00E-12 | 0.32 | hyper1 |
| chr19 | 6495192   | 6496225   | hsa-mir-220b | ENSG00000215937 | -251  | 0.95 | 0.77 | 1.00E-11 | 0.18 | hyper1 |
| chr19 | 1395290   | 1395788   | AC005329.7   | ENSG00000248015 | 927   | 0.83 | 0.53 | 1.10E-11 | 0.29 | hyper1 |
| chr19 | 7937049   | 7937615   | AC010336.1   | ENSG00000183248 | -1235 | 0.94 | 0.62 | 9.70E-11 | 0.32 | hyper1 |
| chr19 | 589490    | 591719    | HCN2         | ENSG00000099822 | 711   | 0.44 | 0.29 | 1.00E-10 | 0.15 | hyper1 |
| chr19 | 46387327  | 46389578  | IRF2BP1      | ENSG00000170604 | 924   | 0.57 | 0.39 | 3.00E-10 | 0.17 | hyper1 |
| chr19 | 31839635  | 31843049  | TSHZ3        | ENSG00000121297 | -911  | 0.3  | 0.18 | 6.10E-10 | 0.12 | hyper1 |
| chr19 | 39465846  | 39466403  | FBXO17       | ENSG00000104835 | 256   | 0.55 | 0.26 | 9.90E-10 | 0.29 | hyper1 |
| chr2  | 43451445  | 43454951  | ZFP36L2      | ENSG00000152518 | 550   | 0.53 | 0.21 | 7.60E-86 | 0.32 | hyper1 |
| chr2  | 171569877 | 171573904 | AC007405.2   | ENSG00000222033 | -813  | 0.49 | 0.24 | 2.10E-33 | 0.26 | hyper1 |
| chr2  | 45395869  | 45398186  | AC009236.2   | ENSG00000231054 | 1305  | 0.49 | 0.18 | 6.50E-32 | 0.31 | hyper1 |
| chr2  | 65215598  | 65217212  | SLC1A4       | ENSG00000115902 | 794   | 0.46 | 0.2  | 1.40E-21 | 0.26 | hyper1 |
| chr2  | 238599857 | 238601430 | LRRFIP1      | ENSG00000124831 | -145  | 0.53 | 0.24 | 6.30E-21 | 0.29 | hyper1 |
| chr2  | 131797362 | 131798088 | ARHGEF4      | ENSG00000136002 | 623   | 0.93 | 0.66 | 5.30E-19 | 0.27 | hyper1 |
| chr2  | 176964062 | 176965509 | HOXD12       | ENSG00000170178 | 327   | 0.53 | 0.21 | 1.10E-18 | 0.32 | hyper1 |
| chr2  | 155554005 | 155556069 | AC061961.2   | ENSG00000235949 | -708  | 0.52 | 0.23 | 1.90E-18 | 0.29 | hyper1 |
| chr2  | 45169505  | 45171884  | AC012354.5   | ENSG00000236502 | -1682 | 0.55 | 0.32 | 5.50E-18 | 0.23 | hyper1 |
| chr2  | 51254522  | 51255498  | NRXN1        | ENSG00000179915 | -91   | 0.99 | 0.81 | 6.60E-18 | 0.18 | hyper1 |
| chr2  | 7571071   | 7571642   | AC013460.1   | ENSG00000229727 | 1302  | 0.88 | 0.62 | 9.50E-18 | 0.26 | hyper1 |
| chr2  | 213696349 | 213698050 | AC093381.1   | ENSG00000231254 | 314   | 0.89 | 0.68 | 2.00E-16 | 0.2  | hyper1 |
| chr2  | 114034594 | 114036041 | PAX8         | ENSG00000125618 | 654   | 0.54 | 0.32 | 4.50E-15 | 0.21 | hyper1 |
| chr2  | 42719784  | 42722166  | KCNG3        | ENSG00000171126 | 142   | 0.38 | 0.22 | 1.20E-14 | 0.15 | hyper1 |
| chr2  | 176980765 | 176981423 | HOXD10       | ENSG00000128710 | -213  | 0.42 | 0.16 | 2.70E-14 | 0.26 | hyper1 |
| chr2  | 45240372  | 45241579  | AC093702.1   | ENSG00000231156 | -168  | 0.58 | 0.3  | 3.30E-14 | 0.29 | hyper1 |
| chr2  | 152954633 | 152955784 | AC079790.2   | ENSG00000225214 | 366   | 0.51 | 0.28 | 5.00E-14 | 0.24 | hyper1 |
| chr2  | 45164561  | 45166567  | AC012354.4   | ENSG00000238204 | 774   | 0.56 | 0.27 | 1.10E-13 | 0.28 | hyper1 |
| chr2  | 202897386 | 202901046 | FZD7         | ENSG00000155760 | -94   | 0.34 | 0.2  | 1.70E-13 | 0.14 | hyper1 |
| chr2  | 219866131 | 219868054 | MIR375       | ENSG00000198973 | -661  | 0.57 | 0.37 | 3.20E-13 | 0.19 | hyper1 |

|       |           |           |              |                 |       |      |      |          |      |        |
|-------|-----------|-----------|--------------|-----------------|-------|------|------|----------|------|--------|
| chr2  | 39186777  | 39187968  | ARHGEF33     | ENSG00000214694 | -273  | 0.59 | 0.37 | 3.50E-13 | 0.22 | hyper1 |
| chr2  | 227662082 | 227664912 | IRS1         | ENSG00000169047 | 978   | 0.55 | 0.37 | 1.60E-12 | 0.19 | hyper1 |
| chr2  | 112939287 | 112939563 | FBLN7        | ENSG00000144152 | -35   | 0.9  | 0.56 | 3.30E-12 | 0.33 | hyper1 |
| chr2  | 99438297  | 99439884  | C2orf55      | ENSG00000196872 | -323  | 0.67 | 0.44 | 3.70E-12 | 0.23 | hyper1 |
| chr2  | 175199463 | 175202639 | SP9          | ENSG00000217236 | 1377  | 0.33 | 0.2  | 1.10E-11 | 0.14 | hyper1 |
| chr2  | 118616575 | 118618163 | HTR5BP       | ENSG00000125631 | 366   | 0.57 | 0.42 | 2.00E-11 | 0.15 | hyper1 |
| chr2  | 198649751 | 198651599 | BOLL         | ENSG00000152430 | -601  | 0.76 | 0.43 | 9.60E-11 | 0.32 | hyper1 |
| chr2  | 47596629  | 47597256  | EPCAM        | ENSG00000119888 | 308   | 0.71 | 0.48 | 3.00E-10 | 0.23 | hyper1 |
| chr2  | 231921413 | 231921972 | PSMD1        | ENSG00000173692 | 114   | 0.41 | 0.16 | 3.90E-10 | 0.25 | hyper1 |
| chr2  | 220107844 | 220108348 | GLB1L        | ENSG00000163521 | -190  | 0.76 | 0.46 | 4.50E-10 | 0.3  | hyper1 |
| chr2  | 3750828   | 3751927   | DCDC2C       | ENSG00000214866 | -76   | 0.4  | 0.24 | 7.30E-10 | 0.16 | hyper1 |
| chr2  | 233497826 | 233499727 | EFHD1        | ENSG00000115468 | 838   | 0.39 | 0.24 | 8.20E-10 | 0.16 | hyper1 |
| chr20 | 57224695  | 57226322  | STX16        | ENSG00000124222 | -820  | 0.38 | 0.15 | 1.80E-25 | 0.22 | hyper1 |
| chr20 | 50417312  | 50419045  | SALL4        | ENSG00000101115 | -53   | 0.67 | 0.35 | 2.60E-24 | 0.32 | hyper1 |
| chr20 | 58514071  | 58515636  | PPP1R3D      | ENSG00000132825 | 499   | 0.53 | 0.26 | 1.50E-21 | 0.27 | hyper1 |
| chr20 | 21485932  | 21496714  | RP5-984P4.5  | ENSG00000258197 | -762  | 0.37 | 0.23 | 7.70E-20 | 0.14 | hyper1 |
| chr20 | 57581902  | 57582595  | CTSZ         | ENSG00000101160 | -88   | 0.54 | 0.23 | 1.20E-16 | 0.32 | hyper1 |
| chr20 | 62368955  | 62371962  | LIME1        | ENSG00000203896 | 900   | 0.47 | 0.27 | 1.80E-16 | 0.2  | hyper1 |
| chr20 | 26188638  | 26190348  | MIR663       | ENSG00000207985 | -579  | 0.3  | 0.18 | 1.90E-16 | 0.13 | hyper1 |
| chr20 | 36148603  | 36150136  | BLCAP        | ENSG00000166619 | -664  | 0.8  | 0.46 | 3.00E-16 | 0.33 | hyper1 |
| chr20 | 22562736  | 22566104  | FOXA2        | ENSG00000125798 | 481   | 0.4  | 0.22 | 1.70E-14 | 0.18 | hyper1 |
| chr20 | 43378668  | 43379438  | RP4-781B1.2  | ENSG00000234194 | -1398 | 0.92 | 0.69 | 8.30E-14 | 0.24 | hyper1 |
| chr20 | 25128764  | 25129610  | RP4-738P15.1 | ENSG00000230725 | 239   | 0.58 | 0.31 | 3.00E-13 | 0.27 | hyper1 |
| chr20 | 825267    | 826276    | FAM110A      | ENSG00000125898 | 486   | 0.65 | 0.38 | 4.40E-13 | 0.28 | hyper1 |
| chr20 | 48098512  | 48099560  | KCNB1        | ENSG00000158445 | 143   | 0.94 | 0.76 | 5.80E-12 | 0.19 | hyper1 |
| chr20 | 57766396  | 57767896  | ZNF831       | ENSG00000124203 | 1071  | 0.96 | 0.83 | 2.40E-11 | 0.13 | hyper1 |
| chr20 | 42135793  | 42137062  | L3MBTL1      | ENSG00000185513 | 107   | 0.47 | 0.26 | 2.00E-10 | 0.22 | hyper1 |
| chr20 | 61992186  | 61993599  | CHRNA4       | ENSG00000101204 | -236  | 0.44 | 0.21 | 2.40E-10 | 0.23 | hyper1 |
| chr21 | 45660557  | 45663172  | ICOSLG       | ENSG00000160223 | -1141 | 0.5  | 0.2  | 4.60E-23 | 0.29 | hyper1 |
| chr21 | 38377937  | 38379437  | DSCR6        | ENSG00000183145 | 237   | 0.59 | 0.28 | 4.30E-22 | 0.31 | hyper1 |

|       |           |           |         |                 |       |      |      |          |      |        |
|-------|-----------|-----------|---------|-----------------|-------|------|------|----------|------|--------|
| chr21 | 45077671  | 45079821  | HSF2BP  | ENSG00000160207 | -721  | 0.71 | 0.47 | 1.70E-13 | 0.25 | hyper1 |
| chr21 | 46236726  | 46238958  | SUMO3   | ENSG00000184900 | 41    | 0.47 | 0.29 | 3.60E-13 | 0.18 | hyper1 |
| chr22 | 20783466  | 20786201  | SCARF2  | ENSG00000244486 | -620  | 0.52 | 0.21 | 3.20E-42 | 0.31 | hyper1 |
| chr22 | 50623164  | 50625226  | TRABD   | ENSG00000170638 | -149  | 0.44 | 0.2  | 1.90E-22 | 0.23 | hyper1 |
| chr22 | 29467291  | 29467817  | KREMEN1 | ENSG00000183762 | -1512 | 0.92 | 0.6  | 4.20E-20 | 0.33 | hyper1 |
| chr22 | 17600563  | 17602611  | CECR6   | ENSG00000183307 | 556   | 0.52 | 0.29 | 5.30E-18 | 0.22 | hyper1 |
| chr22 | 50737809  | 50738961  | PLXNB2  | ENSG00000196576 | 1506  | 0.47 | 0.21 | 3.50E-16 | 0.26 | hyper1 |
| chr22 | 41633520  | 41634842  | CHADL   | ENSG00000100399 | 1444  | 0.5  | 0.24 | 8.40E-16 | 0.26 | hyper1 |
| chr22 | 50636305  | 50636997  | TRABD   | ENSG00000170638 | 1329  | 0.92 | 0.59 | 2.10E-11 | 0.33 | hyper1 |
| chr22 | 21982786  | 21984484  | YDJC    | ENSG00000161179 | 666   | 0.66 | 0.47 | 2.00E-10 | 0.19 | hyper1 |
| chr22 | 29702245  | 29704723  | GAS2L1  | ENSG00000185340 | 912   | 0.4  | 0.2  | 2.40E-10 | 0.2  | hyper1 |
| chr22 | 50496441  | 50497393  | TTLL8   | ENSG00000138892 | -1553 | 0.49 | 0.3  | 3.50E-10 | 0.19 | hyper1 |
| chr22 | 39852205  | 39852939  | MGAT3   | ENSG00000128268 | -777  | 0.54 | 0.27 | 3.60E-10 | 0.26 | hyper1 |
| chr22 | 23522550  | 23524465  | BCR     | ENSG00000186716 | 955   | 0.49 | 0.32 | 6.90E-10 | 0.17 | hyper1 |
| chr22 | 38476836  | 38478839  | SLC16A8 | ENSG00000100156 | 1312  | 0.69 | 0.51 | 9.10E-10 | 0.18 | hyper1 |
| chr3  | 49755763  | 49757317  | AMIGO3  | ENSG00000176020 | 588   | 0.48 | 0.17 | 1.50E-27 | 0.31 | hyper1 |
| chr3  | 52567009  | 52568807  | NT5DC2  | ENSG00000168268 | -361  | 0.67 | 0.38 | 8.90E-19 | 0.29 | hyper1 |
| chr3  | 123166218 | 123168567 | ADCY5   | ENSG00000173175 | 1213  | 0.48 | 0.23 | 6.70E-17 | 0.24 | hyper1 |
| chr3  | 138738721 | 138739923 | PRR23B  | ENSG00000184814 | 446   | 0.88 | 0.63 | 2.50E-16 | 0.25 | hyper1 |
| chr3  | 50312687  | 50314419  | SEMA3B  | ENSG0000012171  | 1488  | 0.66 | 0.41 | 6.80E-14 | 0.25 | hyper1 |
| chr3  | 16554327  | 16555413  | RFTN1   | ENSG00000131378 | -459  | 0.38 | 0.18 | 5.80E-13 | 0.2  | hyper1 |
| chr3  | 32858194  | 32860506  | TRIM71  | ENSG00000206557 | -160  | 0.3  | 0.16 | 1.20E-11 | 0.14 | hyper1 |
| chr3  | 48698335  | 48701667  | CELSR3  | ENSG00000008300 | 347   | 0.39 | 0.25 | 1.20E-11 | 0.14 | hyper1 |
| chr4  | 147559205 | 147561901 | POU4F2  | ENSG00000151615 | 508   | 0.47 | 0.16 | 9.60E-42 | 0.32 | hyper1 |
| chr4  | 2059928   | 2063181   | NAT8L   | ENSG00000185818 | 315   | 0.41 | 0.18 | 5.20E-31 | 0.23 | hyper1 |
| chr4  | 674843    | 676091    | MYL5    | ENSG00000215375 | 932   | 0.91 | 0.58 | 2.60E-28 | 0.32 | hyper1 |
| chr4  | 184018830 | 184021379 | C4orf38 | ENSG00000251359 | 248   | 0.37 | 0.2  | 6.90E-16 | 0.17 | hyper1 |
| chr4  | 10458129  | 10459353  | ZNF518B | ENSG00000178163 | 59    | 0.45 | 0.2  | 1.90E-15 | 0.26 | hyper1 |
| chr4  | 122853554 | 122854169 | TRPC3   | ENSG00000138741 | 332   | 0.93 | 0.63 | 9.30E-13 | 0.3  | hyper1 |
| chr4  | 155410623 | 155413393 | DCHS2   | ENSG00000197410 | 478   | 0.4  | 0.23 | 9.70E-12 | 0.17 | hyper1 |



|      |           |           |               |                 |       |      |      |           |      |        |
|------|-----------|-----------|---------------|-----------------|-------|------|------|-----------|------|--------|
| chr5 | 2748368   | 2757024   | IRX2          | ENSG00000170561 | -927  | 0.55 | 0.25 | 5.40E-108 | 0.3  | hyper1 |
| chr5 | 72415611  | 72416766  | TMEM171       | ENSG00000157111 | 69    | 0.63 | 0.3  | 1.10E-31  | 0.33 | hyper1 |
| chr5 | 176558852 | 176561652 | NSD1          | ENSG00000165671 | 226   | 0.48 | 0.24 | 2.00E-31  | 0.24 | hyper1 |
| chr5 | 178547421 | 178548701 | ADAMTS2       | ENSG00000087116 | 794   | 0.96 | 0.68 | 1.00E-25  | 0.28 | hyper1 |
| chr5 | 149546027 | 149546988 | CDX1          | ENSG00000113722 | 148   | 0.94 | 0.73 | 2.30E-25  | 0.2  | hyper1 |
| chr5 | 140208753 | 140209957 | PCDHA6        | ENSG00000081842 | 1705  | 0.95 | 0.68 | 2.80E-23  | 0.27 | hyper1 |
| chr5 | 140263085 | 140264154 | PCDHA13       | ENSG00000239389 | 1765  | 0.91 | 0.62 | 8.40E-19  | 0.3  | hyper1 |
| chr5 | 140167091 | 140168139 | PCDHA1        | ENSG00000204970 | 1739  | 0.79 | 0.48 | 4.40E-18  | 0.31 | hyper1 |
| chr5 | 133449320 | 133451260 | TCF7          | ENSG00000081059 | -112  | 0.4  | 0.19 | 1.10E-16  | 0.2  | hyper1 |
| chr5 | 140181888 | 140183014 | PCDHA3        | ENSG00000255408 | 1668  | 0.84 | 0.59 | 1.40E-16  | 0.25 | hyper1 |
| chr5 | 140798757 | 140799359 | PCDHGB7       | ENSG00000254122 | 1631  | 0.87 | 0.57 | 3.00E-16  | 0.31 | hyper1 |
| chr5 | 140807339 | 140807788 | PCDHGB8P      | ENSG00000248449 | 1710  | 0.89 | 0.59 | 6.30E-16  | 0.3  | hyper1 |
| chr5 | 114514716 | 114516220 | TRIM36        | ENSG00000152503 | 266   | 0.6  | 0.39 | 6.30E-15  | 0.21 | hyper1 |
| chr5 | 78365298  | 78365711  | DMGDH         | ENSG00000132837 | -55   | 0.52 | 0.21 | 1.50E-14  | 0.31 | hyper1 |
| chr5 | 140553681 | 140554637 | PCDHB7        | ENSG00000113212 | 1091  | 0.74 | 0.49 | 1.80E-12  | 0.25 | hyper1 |
| chr5 | 134374385 | 134376751 | CTC-276P9.1   | ENSG00000249082 | -182  | 0.4  | 0.22 | 3.10E-12  | 0.18 | hyper1 |
| chr5 | 28927605  | 28928637  | CTD-2269E23.2 | ENSG00000226400 | 985   | 0.79 | 0.54 | 3.20E-12  | 0.26 | hyper1 |
| chr5 | 107005130 | 107008191 | EFNA5         | ENSG00000184349 | -332  | 0.34 | 0.18 | 1.00E-11  | 0.15 | hyper1 |
| chr5 | 8457432   | 8458273   | RP11-480D4.3  | ENSG00000247516 | 246   | 0.44 | 0.2  | 2.40E-11  | 0.25 | hyper1 |
| chr5 | 140222122 | 140223108 | PCDHA8        | ENSG00000204962 | 1708  | 0.93 | 0.72 | 5.40E-11  | 0.21 | hyper1 |
| chr5 | 72251182  | 72252513  | FCHO2         | ENSG00000157107 | 39    | 0.31 | 0.12 | 5.90E-11  | 0.18 | hyper1 |
| chr5 | 180045789 | 180048897 | FLT4          | ENSG00000037280 | -1206 | 0.7  | 0.54 | 6.40E-11  | 0.17 | hyper1 |
| chr5 | 9544692   | 9546715   | SEMA5A        | ENSG00000112902 | 484   | 0.37 | 0.19 | 1.20E-10  | 0.18 | hyper1 |
| chr5 | 153857038 | 153859113 | HAND1         | ENSG00000113196 | -251  | 0.38 | 0.23 | 2.50E-10  | 0.16 | hyper1 |
| chr5 | 140305712 | 140307193 | PCDHAC1       | ENSG00000248383 | 150   | 0.36 | 0.21 | 4.00E-10  | 0.16 | hyper1 |
| chr5 | 172661486 | 172662228 | NKX2-5        | ENSG00000183072 | 352   | 0.46 | 0.18 | 4.60E-10  | 0.29 | hyper1 |
| chr5 | 140215200 | 140216159 | PCDHA7        | ENSG00000204963 | 1710  | 0.89 | 0.63 | 8.30E-10  | 0.25 | hyper1 |
| chr6 | 1604606   | 1615866   | FOXC1         | ENSG00000054598 | -443  | 0.37 | 0.23 | 1.00E-26  | 0.14 | hyper1 |
| chr6 | 5084516   | 5087032   | PPP1R3G       | ENSG00000219607 | 54    | 0.45 | 0.23 | 1.40E-24  | 0.21 | hyper1 |
| chr6 | 137242315 | 137245442 | SLC35D3       | ENSG00000182747 | 476   | 0.56 | 0.35 | 5.40E-24  | 0.21 | hyper1 |

|      |           |           |               |                 |       |      |      |          |      |        |
|------|-----------|-----------|---------------|-----------------|-------|------|------|----------|------|--------|
| chr6 | 117085739 | 117086942 | FAM162B       | ENSG00000183807 | 546   | 0.52 | 0.24 | 2.80E-22 | 0.28 | hyper1 |
| chr6 | 291948    | 292839    | DUSP22        | ENSG00000112679 | 296   | 0.5  | 0.25 | 4.00E-22 | 0.25 | hyper1 |
| chr6 | 1311068   | 1314220   | FOXQ1         | ENSG00000164379 | -31   | 0.4  | 0.2  | 9.10E-18 | 0.2  | hyper1 |
| chr6 | 78172231  | 78174088  | HTR1B         | ENSG00000135312 | 331   | 0.51 | 0.21 | 6.90E-15 | 0.3  | hyper1 |
| chr6 | 39281135  | 39282215  | KCNK17        | ENSG00000124780 | 526   | 0.48 | 0.26 | 1.40E-14 | 0.22 | hyper1 |
| chr6 | 108485671 | 108490539 | OSTM1         | ENSG00000081087 | -1061 | 0.47 | 0.31 | 1.30E-13 | 0.16 | hyper1 |
| chr6 | 26521947  | 26522579  | HCG11         | ENSG00000228223 | 187   | 0.51 | 0.18 | 4.40E-13 | 0.32 | hyper1 |
| chr6 | 107955163 | 107956693 | SOBP          | ENSG00000112320 | 670   | 0.39 | 0.21 | 4.90E-13 | 0.18 | hyper1 |
| chr6 | 73330942  | 73333109  | KCNQ5         | ENSG00000185760 | 505   | 0.46 | 0.24 | 1.00E-11 | 0.22 | hyper1 |
| chr6 | 16760178  | 16762985  | RP1-151F17.1  | ENSG00000229931 | 212   | 0.25 | 0.14 | 1.00E-09 | 0.11 | hyper1 |
| chr7 | 72847933  | 72850032  | FZD9          | ENSG00000188763 | 873   | 0.62 | 0.39 | 3.70E-21 | 0.23 | hyper1 |
| chr7 | 152063834 | 152064080 | RP11-208G20.2 | ENSG00000204894 | -299  | 0.95 | 0.62 | 2.00E-20 | 0.33 | hyper1 |
| chr7 | 128470443 | 128471161 | FLNC          | ENSG00000128591 | 322   | 0.53 | 0.22 | 5.90E-20 | 0.32 | hyper1 |
| chr7 | 97361132  | 97363018  | TAC1          | ENSG00000006128 | 855   | 0.46 | 0.21 | 1.60E-17 | 0.26 | hyper1 |
| chr7 | 36007011  | 36008154  | SEPT7P3       | ENSG00000226102 | 1559  | 0.95 | 0.72 | 1.60E-15 | 0.23 | hyper1 |
| chr7 | 128809089 | 128809393 | RP11-286H14.6 | ENSG00000240685 | 1188  | 0.51 | 0.21 | 1.20E-14 | 0.3  | hyper1 |
| chr7 | 49813008  | 49815752  | VWC2          | ENSG00000188730 | 1123  | 0.26 | 0.16 | 1.60E-14 | 0.11 | hyper1 |
| chr7 | 48128727  | 48129961  | UPP1          | ENSG00000183696 | 520   | 0.39 | 0.23 | 9.10E-12 | 0.16 | hyper1 |
| chr7 | 63250057  | 63250948  | CTD-2526L21.3 | ENSG00000227397 | 215   | 0.6  | 0.43 | 1.90E-11 | 0.18 | hyper1 |
| chr7 | 27225050  | 27225629  | HOXA11-AS1    | ENSG00000240990 | 186   | 0.46 | 0.18 | 4.00E-11 | 0.28 | hyper1 |
| chr7 | 103086344 | 103086840 | SLC26A5       | ENSG00000170615 | 6     | 0.35 | 0.15 | 6.50E-11 | 0.2  | hyper1 |
| chr7 | 533426    | 534109    | AC147651.1    | ENSG00000234471 | 1988  | 0.94 | 0.78 | 2.10E-10 | 0.17 | hyper1 |
| chr7 | 29605827  | 29606290  | PRR15         | ENSG00000176532 | 992   | 0.52 | 0.25 | 3.70E-10 | 0.27 | hyper1 |
| chr8 | 37551944  | 37555922  | ZNF703        | ENSG00000183779 | 664   | 0.68 | 0.36 | 4.90E-39 | 0.32 | hyper1 |
| chr8 | 61590807  | 61593180  | CHD7          | ENSG00000171316 | 656   | 0.4  | 0.15 | 2.70E-18 | 0.25 | hyper1 |
| chr8 | 145751955 | 145756326 | LRRC24        | ENSG00000254402 | -1738 | 0.69 | 0.46 | 6.90E-18 | 0.23 | hyper1 |
| chr8 | 143531118 | 143534495 | BAI1          | ENSG00000181790 | 1766  | 0.42 | 0.21 | 1.20E-16 | 0.2  | hyper1 |
| chr8 | 141520869 | 141522460 | CHRAC1        | ENSG00000104472 | 267   | 0.37 | 0.15 | 3.70E-15 | 0.22 | hyper1 |
| chr8 | 144815203 | 144816518 | FAM83H        | ENSG00000180921 | 111   | 0.44 | 0.14 | 5.00E-15 | 0.3  | hyper1 |
| chr8 | 55014024  | 55014681  | LYPLA1        | ENSG00000120992 | -257  | 0.48 | 0.15 | 1.10E-13 | 0.33 | hyper1 |

|      |           |           |               |                 |       |      |      |          |      |        |
|------|-----------|-----------|---------------|-----------------|-------|------|------|----------|------|--------|
| chr8 | 494155    | 496083    | C8orf42       | ENSG00000180190 | -282  | 0.4  | 0.17 | 3.40E-13 | 0.24 | hyper1 |
| chr8 | 97172634  | 97173880  | GDF6          | ENSG00000156466 | -310  | 0.41 | 0.19 | 1.40E-12 | 0.22 | hyper1 |
| chr8 | 144679237 | 144681851 | EEF1D         | ENSG00000104529 | -1269 | 0.41 | 0.22 | 3.70E-12 | 0.19 | hyper1 |
| chr8 | 9008058   | 9009353   | PPP1R3B       | ENSG00000173281 | -499  | 0.43 | 0.18 | 4.40E-12 | 0.26 | hyper1 |
| chr8 | 26721642  | 26724566  | ADRA1A        | ENSG00000120907 | -611  | 0.52 | 0.27 | 1.50E-11 | 0.25 | hyper1 |
| chr8 | 37822486  | 37824008  | ADRB3         | ENSG00000188778 | 15    | 0.41 | 0.17 | 2.50E-11 | 0.23 | hyper1 |
| chr8 | 145725460 | 145726707 | CTD-2517M14.5 | ENSG00000248411 | -420  | 0.86 | 0.6  | 4.70E-11 | 0.26 | hyper1 |
| chr8 | 86089201  | 86090287  | E2F5          | ENSG00000133740 | 284   | 0.44 | 0.15 | 5.30E-11 | 0.29 | hyper1 |
| chr8 | 144808221 | 144810978 | FAM83H        | ENSG00000180921 | 1211  | 0.56 | 0.41 | 5.30E-11 | 0.15 | hyper1 |
| chr8 | 143694430 | 143696166 | ARC           | ENSG00000198576 | 535   | 0.5  | 0.26 | 7.20E-11 | 0.24 | hyper1 |
| chr8 | 142401533 | 142402494 | PTP4A3        | ENSG00000184489 | -80   | 0.51 | 0.18 | 8.80E-11 | 0.33 | hyper1 |
| chr8 | 104510870 | 104513913 | RP11-1C8.4    | ENSG00000253477 | -943  | 0.32 | 0.16 | 4.60E-10 | 0.16 | hyper1 |
| chr9 | 139835416 | 139839440 | FBXW5         | ENSG00000159069 | -308  | 0.66 | 0.37 | 9.20E-25 | 0.29 | hyper1 |
| chr9 | 139947906 | 139948937 | ENTPD2        | ENSG00000054179 | 28    | 0.47 | 0.21 | 1.30E-22 | 0.26 | hyper1 |
| chr9 | 34370773  | 34372902  | KIAA1161      | ENSG00000164976 | 993   | 0.93 | 0.73 | 1.80E-20 | 0.19 | hyper1 |
| chr9 | 139971499 | 139973965 | UAP1L1        | ENSG00000197355 | 779   | 0.4  | 0.22 | 2.00E-19 | 0.19 | hyper1 |
| chr9 | 93563775  | 93564546  | SYK           | ENSG00000165025 | 91    | 0.45 | 0.17 | 3.30E-16 | 0.28 | hyper1 |
| chr9 | 140771300 | 140773513 | CACNA1B       | ENSG00000148408 | 165   | 0.38 | 0.21 | 4.90E-15 | 0.18 | hyper1 |
| chr9 | 100849699 | 100850392 | TRIM14        | ENSG00000106785 | 238   | 0.65 | 0.39 | 1.20E-11 | 0.26 | hyper1 |
| chr9 | 139257842 | 139259075 | DNLZ          | ENSG00000213221 | -287  | 0.49 | 0.27 | 6.00E-11 | 0.23 | hyper1 |
| chr9 | 136038416 | 136039577 | GBGT1         | ENSG00000148288 | 286   | 0.44 | 0.22 | 9.80E-11 | 0.21 | hyper1 |
| chr9 | 139377110 | 139379174 | C9orf163      | ENSG00000196366 | 195   | 0.3  | 0.13 | 1.40E-10 | 0.17 | hyper1 |
| chr9 | 131154346 | 131155923 | MIR219-2      | ENSG00000207955 | -141  | 0.71 | 0.54 | 1.60E-10 | 0.18 | hyper1 |
| chr1 | 228399471 | 228402037 | C1orf145      | ENSG00000162913 | 593   | 0.78 | 0.3  | 4.90E-44 | 0.48 | hyper2 |
| chr1 | 201368560 | 201369032 | LAD1          | ENSG00000159166 | -120  | 0.91 | 0.32 | 9.10E-36 | 0.59 | hyper2 |
| chr1 | 1289707   | 1291126   | MXRA8         | ENSG00000162576 | -562  | 0.67 | 0.32 | 4.80E-33 | 0.35 | hyper2 |
| chr1 | 209404845 | 209405473 | RP11-385M4.3  | ENSG00000224540 | -382  | 0.7  | 0.33 | 6.20E-24 | 0.37 | hyper2 |
| chr1 | 32226146  | 32226535  | BAI2          | ENSG00000121753 | 287   | 0.82 | 0.26 | 1.10E-23 | 0.56 | hyper2 |
| chr1 | 26737246  | 26738148  | LIN28A        | ENSG00000131914 | 428   | 0.62 | 0.22 | 1.60E-21 | 0.4  | hyper2 |
| chr1 | 67600390  | 67600715  | C1orf141      | ENSG00000203963 | 87    | 0.8  | 0.26 | 6.10E-20 | 0.53 | hyper2 |

|       |           |           |               |                 |       |      |      |          |      |        |
|-------|-----------|-----------|---------------|-----------------|-------|------|------|----------|------|--------|
| chr1  | 223316185 | 223316689 | TLR5          | ENSG00000187554 | 143   | 0.69 | 0.18 | 2.60E-19 | 0.5  | hyper2 |
| chr1  | 209979316 | 209979666 | IRF6          | ENSG00000117595 | -102  | 0.78 | 0.29 | 5.80E-19 | 0.48 | hyper2 |
| chr1  | 84326267  | 84326838  | RP11-475O6.1  | ENSG00000233008 | 74    | 0.98 | 0.46 | 9.00E-19 | 0.52 | hyper2 |
| chr1  | 221050448 | 221050864 | HLX           | ENSG00000136630 | -1043 | 0.96 | 0.39 | 3.70E-18 | 0.57 | hyper2 |
| chr1  | 182921819 | 182922644 | SHCBP1L       | ENSG00000157060 | -347  | 0.88 | 0.52 | 2.80E-17 | 0.36 | hyper2 |
| chr1  | 87597543  | 87598515  | HS2ST1        | ENSG00000153936 | 391   | 0.86 | 0.51 | 7.30E-17 | 0.35 | hyper2 |
| chr1  | 52195028  | 52195821  | OSBPL9        | ENSG00000117859 | 152   | 0.68 | 0.28 | 6.30E-16 | 0.39 | hyper2 |
| chr1  | 161993022 | 161994131 | OLFML2B       | ENSG00000162745 | -146  | 0.46 | 0.11 | 7.30E-16 | 0.35 | hyper2 |
| chr1  | 10764449  | 10764925  | CASZ1         | ENSG00000130940 | 945   | 0.98 | 0.56 | 2.20E-14 | 0.43 | hyper2 |
| chr1  | 55271665  | 55271972  | C1orf177      | ENSG00000162398 | 82    | 0.83 | 0.4  | 2.70E-14 | 0.43 | hyper2 |
| chr1  | 161008377 | 161008830 | TSTD1         | ENSG00000215845 | -84   | 0.87 | 0.43 | 5.80E-13 | 0.43 | hyper2 |
| chr1  | 16163752  | 16164123  | RP11-169K16.9 | ENSG00000179743 | -1582 | 0.98 | 0.64 | 1.10E-11 | 0.34 | hyper2 |
| chr1  | 120439013 | 120439220 | ADAM30        | ENSG00000134249 | 2     | 0.91 | 0.31 | 2.70E-11 | 0.6  | hyper2 |
| chr1  | 2063782   | 2064052   | PRKCZ         | ENSG00000067606 | -1160 | 0.77 | 0.18 | 5.30E-11 | 0.59 | hyper2 |
| chr1  | 151966567 | 151966387 | S100A10       | ENSG00000197747 | 278   | 0.81 | 0.25 | 7.70E-11 | 0.56 | hyper2 |
| chr1  | 1153784   | 1154419   | SDF4          | ENSG00000078808 | 1572  | 0.92 | 0.51 | 8.10E-11 | 0.41 | hyper2 |
| chr1  | 17445651  | 17446088  | PADI2         | ENSG00000117115 | 61    | 0.63 | 0.14 | 1.20E-10 | 0.49 | hyper2 |
| chr10 | 88702315  | 88703322  | MMRN2         | ENSG00000173269 | 1510  | 0.83 | 0.34 | 6.40E-48 | 0.49 | hyper2 |
| chr10 | 81002109  | 81003687  | ZMIZ1         | ENSG00000108175 | -528  | 0.56 | 0.22 | 1.20E-33 | 0.34 | hyper2 |
| chr10 | 127462230 | 127462987 | MMP21         | ENSG00000154485 | 1782  | 0.9  | 0.53 | 3.10E-33 | 0.37 | hyper2 |
| chr10 | 102996034 | 102996646 | RP11-107I14.1 | ENSG00000227128 | 515   | 0.9  | 0.37 | 2.20E-32 | 0.52 | hyper2 |
| chr10 | 94451329  | 94451737  | HHEX          | ENSG00000152804 | -79   | 0.9  | 0.51 | 2.40E-23 | 0.4  | hyper2 |
| chr10 | 121577529 | 121578385 | INPP5F        | ENSG00000198825 | -271  | 0.86 | 0.52 | 7.60E-16 | 0.34 | hyper2 |
| chr10 | 5882303   | 5882635   | GDI2          | ENSG00000057608 | 1626  | 0.75 | 0.34 | 5.60E-12 | 0.41 | hyper2 |
| chr10 | 126715728 | 126715929 | CTBP2         | ENSG00000175029 | 631   | 0.86 | 0.29 | 6.50E-12 | 0.57 | hyper2 |
| chr10 | 102899822 | 102900263 | RP11-31L23.3  | ENSG00000226740 | -574  | 0.61 | 0.27 | 3.60E-11 | 0.35 | hyper2 |
| chr10 | 134977930 | 134978148 | KNDC1         | ENSG00000171798 | 348   | 0.84 | 0.3  | 4.20E-11 | 0.54 | hyper2 |
| chr10 | 134913543 | 134914039 | GPR123        | ENSG00000197177 | -1959 | 0.82 | 0.39 | 5.40E-11 | 0.43 | hyper2 |
| chr11 | 65352231  | 65353134  | EHBP1L1       | ENSG00000173442 | 916   | 0.89 | 0.36 | 1.20E-80 | 0.53 | hyper2 |
| chr11 | 66885275  | 66887330  | KDM2A         | ENSG00000173120 | -438  | 0.64 | 0.19 | 2.40E-55 | 0.45 | hyper2 |

|       |           |           |               |                 |       |      |      |          |      |        |
|-------|-----------|-----------|---------------|-----------------|-------|------|------|----------|------|--------|
| chr11 | 94883647  | 94884811  | RP11-712B9.2  | ENSG00000245552 | 526   | 0.84 | 0.26 | 5.60E-43 | 0.58 | hyper2 |
| chr11 | 823556    | 824878    | PNPLA2        | ENSG00000177666 | 569   | 0.84 | 0.35 | 1.60E-40 | 0.49 | hyper2 |
| chr11 | 31825743  | 31826967  | PAX6          | ENSG00000007372 | -188  | 0.72 | 0.24 | 3.10E-38 | 0.49 | hyper2 |
| chr11 | 77907211  | 77908088  | USP35         | ENSG00000118369 | -194  | 0.98 | 0.42 | 1.60E-32 | 0.56 | hyper2 |
| chr11 | 315739    | 316539    | IFITM1        | ENSG00000185885 | 1721  | 0.76 | 0.29 | 2.20E-31 | 0.48 | hyper2 |
| chr11 | 65409636  | 65410127  | SIPA1         | ENSG00000213445 | 292   | 0.79 | 0.29 | 2.20E-29 | 0.5  | hyper2 |
| chr11 | 943737    | 944142    | AP2A2         | ENSG00000183020 | 839   | 0.98 | 0.44 | 2.40E-28 | 0.54 | hyper2 |
| chr11 | 67887977  | 67889768  | CHKA          | ENSG00000110721 | -577  | 0.54 | 0.16 | 3.60E-26 | 0.38 | hyper2 |
| chr11 | 7694711   | 7695685   | CYB5R2        | ENSG00000166394 | -469  | 0.57 | 0.2  | 7.50E-26 | 0.37 | hyper2 |
| chr11 | 62314761  | 62315054  | AHNAK         | ENSG00000124942 | -600  | 0.95 | 0.38 | 7.80E-26 | 0.57 | hyper2 |
| chr11 | 504189    | 504659    | RNH1          | ENSG00000023191 | 128   | 0.77 | 0.24 | 1.10E-25 | 0.53 | hyper2 |
| chr11 | 65313843  | 65314455  | LTBP3         | ENSG00000168056 | 81    | 0.72 | 0.31 | 1.20E-24 | 0.41 | hyper2 |
| chr11 | 45923980  | 45924727  | MAPK8IP1      | ENSG00000121653 | 869   | 0.91 | 0.36 | 5.10E-22 | 0.56 | hyper2 |
| chr11 | 62455073  | 62455868  | LRRN4CL       | ENSG00000177363 | 1901  | 0.84 | 0.28 | 1.00E-20 | 0.56 | hyper2 |
| chr11 | 124628367 | 124629590 | RP11-677M14.3 | ENSG00000250073 | -47   | 0.8  | 0.34 | 8.90E-20 | 0.45 | hyper2 |
| chr11 | 72301302  | 72301746  | PDE2A         | ENSG00000186642 | -61   | 0.96 | 0.46 | 1.20E-18 | 0.5  | hyper2 |
| chr11 | 60718428  | 60718888  | SLC15A3       | ENSG00000110446 | 460   | 0.8  | 0.29 | 1.50E-17 | 0.51 | hyper2 |
| chr11 | 65685100  | 65685364  | C11orf68      | ENSG00000175573 | 599   | 0.7  | 0.14 | 2.10E-17 | 0.57 | hyper2 |
| chr11 | 18477298  | 18477756  | LDHAL6A       | ENSG00000166800 | 156   | 0.92 | 0.48 | 7.80E-17 | 0.44 | hyper2 |
| chr11 | 67232298  | 67232558  | TMEM134       | ENSG00000172663 | 151   | 0.82 | 0.22 | 1.70E-16 | 0.6  | hyper2 |
| chr11 | 94883335  | 94883565  | RP11-712B9.2  | ENSG00000245552 | -253  | 0.98 | 0.43 | 2.50E-16 | 0.55 | hyper2 |
| chr11 | 17565766  | 17566052  | USH1C         | ENSG00000006611 | -55   | 0.61 | 0.19 | 4.40E-16 | 0.41 | hyper2 |
| chr11 | 858575    | 858932    | RP11-1391J7.1 | ENSG00000250397 | 1042  | 0.5  | 0.15 | 1.80E-15 | 0.36 | hyper2 |
| chr11 | 113258443 | 113258821 | ANKK1         | ENSG00000170209 | 119   | 0.97 | 0.46 | 1.90E-15 | 0.51 | hyper2 |
| chr11 | 18230619  | 18230906  | RP11-113D6.10 | ENSG00000189332 | 77    | 0.76 | 0.36 | 6.00E-15 | 0.4  | hyper2 |
| chr11 | 65190824  | 65191058  | NEAT1         | ENSG00000245532 | 672   | 0.99 | 0.44 | 1.10E-12 | 0.55 | hyper2 |
| chr11 | 1470033   | 1470388   | BRSK2         | ENSG00000174672 | -1705 | 0.71 | 0.35 | 2.30E-11 | 0.36 | hyper2 |
| chr11 | 64621207  | 64622246  | EHD1          | ENSG00000110047 | 841   | 0.89 | 0.53 | 3.70E-10 | 0.36 | hyper2 |
| chr12 | 29302034  | 29302954  | FAR2          | ENSG00000064763 | 458   | 0.8  | 0.21 | 7.70E-61 | 0.59 | hyper2 |
| chr12 | 50354839  | 50356163  | AQP5          | ENSG00000161798 | -152  | 0.85 | 0.38 | 1.60E-53 | 0.47 | hyper2 |

|       |           |           |               |                 |       |      |      |          |      |        |
|-------|-----------|-----------|---------------|-----------------|-------|------|------|----------|------|--------|
| chr12 | 114845861 | 114847650 | RP11-385N17.1 | ENSG00000255399 | 759   | 0.81 | 0.24 | 2.70E-52 | 0.57 | hyper2 |
| chr12 | 1905277   | 1906765   | CACNA2D4      | ENSG00000151062 | 668   | 0.82 | 0.45 | 4.00E-35 | 0.37 | hyper2 |
| chr12 | 49658246  | 49659175  | RP11-977B10.2 | ENSG00000258101 | -171  | 0.91 | 0.4  | 3.50E-31 | 0.51 | hyper2 |
| chr12 | 120031494 | 120033212 | TMEM233       | ENSG00000224982 | 634   | 0.57 | 0.18 | 2.00E-30 | 0.39 | hyper2 |
| chr12 | 752208    | 752655    | RP11-218M22.1 | ENSG00000177406 | 284   | 0.62 | 0.13 | 2.00E-23 | 0.48 | hyper2 |
| chr12 | 113908887 | 113910681 | RP11-82C23.2  | ENSG00000257935 | -24   | 0.72 | 0.31 | 6.90E-23 | 0.41 | hyper2 |
| chr12 | 110271000 | 110271582 | TRPV4         | ENSG00000111199 | -85   | 0.87 | 0.43 | 7.20E-23 | 0.44 | hyper2 |
| chr12 | 122016170 | 122017693 | KDM2B         | ENSG00000089094 | 441   | 0.58 | 0.21 | 1.30E-19 | 0.37 | hyper2 |
| chr12 | 6438272   | 6438931   | TNFRSF1A      | ENSG00000067182 | 1712  | 0.9  | 0.5  | 2.60E-19 | 0.39 | hyper2 |
| chr12 | 58021294  | 58022037  | B4GALNT1      | ENSG00000135454 | 847   | 0.79 | 0.34 | 1.30E-14 | 0.45 | hyper2 |
| chr12 | 8025364   | 8025908   | SLC2A14       | ENSG00000173262 | -238  | 0.61 | 0.27 | 2.40E-14 | 0.35 | hyper2 |
| chr12 | 6492889   | 6493522   | LTBR          | ENSG00000111321 | 6     | 0.9  | 0.52 | 4.00E-14 | 0.38 | hyper2 |
| chr12 | 104609397 | 104610172 | TXNRD1        | ENSG00000198431 | 227   | 0.84 | 0.44 | 3.00E-13 | 0.41 | hyper2 |
| chr12 | 39299248  | 39299629  | CPNE8         | ENSG00000139117 | -5    | 0.95 | 0.37 | 7.90E-13 | 0.58 | hyper2 |
| chr12 | 64215499  | 64215990  | RP11-415I12.6 | ENSG00000255642 | -57   | 0.78 | 0.31 | 2.10E-11 | 0.48 | hyper2 |
| chr12 | 115173614 | 115174822 | SNORA27       | ENSG00000252459 | -1291 | 0.61 | 0.25 | 3.30E-11 | 0.36 | hyper2 |
| chr13 | 58206526  | 58208930  | PCDH17        | ENSG00000118946 | 1073  | 0.6  | 0.2  | 1.50E-42 | 0.4  | hyper2 |
| chr13 | 96293606  | 96294603  | DZIP1         | ENSG00000134874 | 179   | 0.8  | 0.25 | 4.80E-31 | 0.55 | hyper2 |
| chr13 | 33923930  | 33924781  | RP11-141M1.4  | ENSG00000233001 | 406   | 0.7  | 0.18 | 5.00E-26 | 0.51 | hyper2 |
| chr13 | 50697984  | 50702286  | DLEU2         | ENSG00000231607 | -279  | 0.65 | 0.3  | 2.60E-25 | 0.35 | hyper2 |
| chr13 | 50070022  | 50070719  | PHF11         | ENSG00000136147 | 273   | 0.7  | 0.19 | 1.50E-20 | 0.52 | hyper2 |
| chr13 | 113783886 | 113784702 | KARSP2        | ENSG00000230371 | -436  | 0.77 | 0.39 | 3.40E-13 | 0.38 | hyper2 |
| chr13 | 19183083  | 19183959  | LONRF2P2      | ENSG00000233905 | 249   | 0.93 | 0.39 | 3.40E-10 | 0.54 | hyper2 |
| chr14 | 61746804  | 61748141  | TMEM30B       | ENSG00000182107 | 487   | 0.51 | 0.15 | 1.20E-50 | 0.36 | hyper2 |
| chr14 | 105944421 | 105945700 | CRIP2         | ENSG00000182809 | 131   | 0.83 | 0.38 | 6.30E-47 | 0.45 | hyper2 |
| chr14 | 59930634  | 59932251  | GPR135        | ENSG00000181619 | 554   | 0.53 | 0.19 | 3.40E-46 | 0.34 | hyper2 |
| chr14 | 104394529 | 104395234 | TDRD9         | ENSG00000156414 | 82    | 0.83 | 0.46 | 6.60E-30 | 0.36 | hyper2 |
| chr14 | 96180256  | 96180848  | TCL1A         | ENSG00000100721 | -19   | 0.87 | 0.47 | 2.40E-24 | 0.4  | hyper2 |
| chr14 | 101290523 | 101290868 | MEG3          | ENSG00000214548 | -1760 | 0.88 | 0.39 | 8.80E-21 | 0.49 | hyper2 |
| chr14 | 104552012 | 104552478 | ASPG          | ENSG00000166183 | 229   | 0.82 | 0.42 | 4.80E-20 | 0.41 | hyper2 |

|       |           |           |               |                 |       |      |      |           |      |        |
|-------|-----------|-----------|---------------|-----------------|-------|------|------|-----------|------|--------|
| chr14 | 37052537  | 37052838  | NKX2-8        | ENSG00000136327 | -875  | 0.78 | 0.22 | 9.60E-11  | 0.55 | hyper2 |
| chr15 | 40573628  | 40576118  | ANKRD63       | ENSG00000230778 | -86   | 0.63 | 0.28 | 1.00E-34  | 0.35 | hyper2 |
| chr15 | 44068586  | 44069792  | ELL3          | ENSG00000128886 | -551  | 0.65 | 0.16 | 1.20E-34  | 0.49 | hyper2 |
| chr15 | 40544352  | 40545512  | C15orf56      | ENSG00000176753 | 178   | 0.58 | 0.18 | 1.00E-31  | 0.41 | hyper2 |
| chr15 | 69325339  | 69325617  | NOX5          | ENSG00000255346 | 1345  | 0.97 | 0.38 | 1.10E-18  | 0.59 | hyper2 |
| chr15 | 101084428 | 101085178 | LASS3         | ENSG00000154227 | -327  | 0.9  | 0.46 | 1.40E-18  | 0.44 | hyper2 |
| chr15 | 69323959  | 69324232  | NOX5          | ENSG00000255346 | -38   | 0.81 | 0.28 | 1.30E-13  | 0.53 | hyper2 |
| chr15 | 54051655  | 54052004  | WDR72         | ENSG00000166415 | 30    | 0.57 | 0.16 | 1.30E-11  | 0.41 | hyper2 |
| chr16 | 2139803   | 2142170   | MIR1225       | ENSG00000221656 | -701  | 0.9  | 0.43 | 2.40E-64  | 0.47 | hyper2 |
| chr16 | 19894965  | 19897156  | GPRC5B        | ENSG00000167191 | 179   | 0.71 | 0.23 | 2.80E-39  | 0.48 | hyper2 |
| chr16 | 4164808   | 4166258   | ADCY9         | ENSG00000162104 | 653   | 0.86 | 0.39 | 6.10E-34  | 0.48 | hyper2 |
| chr16 | 56659107  | 56659660  | MT1E          | ENSG00000169715 | -4    | 0.64 | 0.15 | 2.90E-27  | 0.49 | hyper2 |
| chr16 | 90088915  | 90089413  | GAS8          | ENSG00000141013 | 156   | 0.63 | 0.19 | 7.00E-26  | 0.45 | hyper2 |
| chr16 | 67233032  | 67233862  | ELMO3         | ENSG00000102890 | 35    | 0.81 | 0.39 | 5.80E-23  | 0.42 | hyper2 |
| chr16 | 75528624  | 75529437  | CHST6         | ENSG00000183196 | -104  | 0.85 | 0.38 | 3.50E-17  | 0.47 | hyper2 |
| chr16 | 48399730  | 48400040  | SIAH1         | ENSG00000196470 | -73   | 0.8  | 0.27 | 8.30E-13  | 0.53 | hyper2 |
| chr16 | 12897365  | 12897889  | CPPED1        | ENSG00000103381 | 74    | 0.45 | 0.11 | 6.80E-12  | 0.34 | hyper2 |
| chr16 | 2546264   | 2547039   | TBC1D24       | ENSG00000162065 | 555   | 0.88 | 0.49 | 9.10E-11  | 0.39 | hyper2 |
| chr16 | 230301    | 231761    | HBQ1          | ENSG00000086506 | 579   | 0.49 | 0.16 | 1.70E-10  | 0.34 | hyper2 |
| chr16 | 30485382  | 30485721  | ITGAL         | ENSG00000005844 | 1479  | 0.74 | 0.36 | 2.30E-10  | 0.38 | hyper2 |
| chr17 | 59473060  | 59483266  | TBX2          | ENSG00000121068 | 906   | 0.62 | 0.26 | 4.30E-142 | 0.36 | hyper2 |
| chr17 | 79485599  | 79486913  | RP13-766D20.2 | ENSG00000229848 | 190   | 0.81 | 0.23 | 9.80E-96  | 0.58 | hyper2 |
| chr17 | 29885900  | 29887377  | MIR193A       | ENSG00000207614 | -377  | 0.69 | 0.16 | 2.30E-87  | 0.54 | hyper2 |
| chr17 | 70112824  | 70114271  | AC005152.2    | ENSG00000234899 | -1390 | 0.95 | 0.35 | 3.00E-73  | 0.6  | hyper2 |
| chr17 | 59531723  | 59535254  | TBX4          | ENSG00000121075 | -319  | 0.81 | 0.41 | 2.90E-52  | 0.41 | hyper2 |
| chr17 | 7758607   | 7758980   | TMEM88        | ENSG00000167874 | 409   | 0.94 | 0.38 | 1.30E-32  | 0.56 | hyper2 |
| chr17 | 42634829  | 42636851  | FZD2          | ENSG00000180340 | 915   | 0.68 | 0.26 | 1.50E-28  | 0.43 | hyper2 |
| chr17 | 42392323  | 42393079  | AC003102.3    | ENSG00000225445 | -18   | 0.93 | 0.42 | 4.30E-24  | 0.52 | hyper2 |
| chr17 | 53638662  | 53638964  | AC007638.2    | ENSG00000236319 | -361  | 0.96 | 0.38 | 1.00E-21  | 0.58 | hyper2 |
| chr17 | 80708192  | 80708528  | TBCD          | ENSG00000141556 | -1580 | 0.99 | 0.54 | 3.20E-18  | 0.44 | hyper2 |

|       |           |           |            |                 |       |      |      |          |      |        |
|-------|-----------|-----------|------------|-----------------|-------|------|------|----------|------|--------|
| chr17 | 70111979  | 70112308  | AC005152.2 | ENSG00000234899 | 14    | 0.96 | 0.55 | 1.70E-17 | 0.41 | hyper2 |
| chr17 | 20744130  | 20744846  | FAM108A7P  | ENSG00000226981 | 128   | 0.74 | 0.39 | 1.50E-14 | 0.35 | hyper2 |
| chr17 | 7832532   | 7833164   | KCNAB3     | ENSG00000170049 | -95   | 0.75 | 0.32 | 6.10E-14 | 0.44 | hyper2 |
| chr17 | 37856448  | 37856891  | ERBB2      | ENSG00000141736 | 415   | 0.51 | 0.17 | 1.50E-13 | 0.34 | hyper2 |
| chr17 | 38333605  | 38334795  | RAPGEFL1   | ENSG00000108352 | 452   | 0.6  | 0.26 | 1.70E-13 | 0.34 | hyper2 |
| chr17 | 1509882   | 1510101   | SLC43A2    | ENSG00000167703 | -1780 | 0.76 | 0.29 | 5.80E-11 | 0.47 | hyper2 |
| chr17 | 3289362   | 3290072   | AC087498.1 | ENSG00000180042 | 493   | 0.67 | 0.27 | 5.90E-11 | 0.41 | hyper2 |
| chr17 | 46802790  | 46803076  | HOXB13-AS1 | ENSG00000229637 | 1879  | 0.82 | 0.27 | 7.20E-11 | 0.55 | hyper2 |
| chr18 | 5890292   | 5891682   | TMEM200C   | ENSG00000206432 | 1116  | 0.95 | 0.6  | 2.40E-56 | 0.35 | hyper2 |
| chr18 | 52626517  | 52626849  | CCDC68     | ENSG00000166510 | 56    | 0.95 | 0.35 | 6.80E-27 | 0.6  | hyper2 |
| chr18 | 74799144  | 74800038  | MBP        | ENSG00000197971 | -26   | 0.92 | 0.52 | 3.90E-25 | 0.4  | hyper2 |
| chr19 | 19624954  | 19627258  | NDUFA13    | ENSG00000186010 | -490  | 0.78 | 0.44 | 1.30E-57 | 0.34 | hyper2 |
| chr19 | 38039561  | 38040395  | AC022148.1 | ENSG00000180458 | 95    | 0.97 | 0.43 | 2.60E-39 | 0.54 | hyper2 |
| chr19 | 48047796  | 48049162  | ZNF541     | ENSG00000118156 | 78    | 0.81 | 0.44 | 2.40E-36 | 0.37 | hyper2 |
| chr19 | 46282544  | 46283127  | DMPK       | ENSG00000104936 | 482   | 0.87 | 0.38 | 2.60E-32 | 0.49 | hyper2 |
| chr19 | 41316543  | 41317318  | CYP2T2P    | ENSG00000233622 | 365   | 0.69 | 0.14 | 1.60E-28 | 0.55 | hyper2 |
| chr19 | 13983596  | 13984152  | MIR181C    | ENSG00000207613 | -1639 | 0.87 | 0.36 | 8.40E-25 | 0.5  | hyper2 |
| chr19 | 1387527   | 1388009   | NDUFS7     | ENSG00000115286 | 24    | 0.92 | 0.34 | 1.40E-24 | 0.57 | hyper2 |
| chr19 | 36642327  | 36643585  | COX7A1     | ENSG00000161281 | -47   | 0.92 | 0.4  | 5.50E-20 | 0.52 | hyper2 |
| chr19 | 8273530   | 8273920   | LASS4      | ENSG00000090661 | -503  | 0.63 | 0.23 | 2.10E-17 | 0.39 | hyper2 |
| chr19 | 36484904  | 36485476  | SDHAF1     | ENSG00000205138 | -900  | 0.79 | 0.3  | 6.80E-17 | 0.49 | hyper2 |
| chr19 | 17000627  | 17001398  | F2RL3      | ENSG00000127533 | 1186  | 0.95 | 0.49 | 2.20E-15 | 0.46 | hyper2 |
| chr19 | 1924512   | 1924775   | AC012615.1 | ENSG00000198683 | -542  | 0.75 | 0.29 | 7.30E-15 | 0.47 | hyper2 |
| chr19 | 1360038   | 1360347   | MUM1       | ENSG00000160953 | 67    | 0.97 | 0.53 | 1.30E-14 | 0.44 | hyper2 |
| chr19 | 1953778   | 1954023   | C19orf34   | ENSG00000180846 | 648   | 0.98 | 0.45 | 2.70E-14 | 0.52 | hyper2 |
| chr19 | 2046074   | 2046437   | MKNK2      | ENSG00000099875 | 437   | 0.94 | 0.55 | 8.00E-13 | 0.39 | hyper2 |
| chr19 | 46806998  | 46807617  | HIF3A      | ENSG00000124440 | 201   | 0.84 | 0.48 | 2.10E-10 | 0.36 | hyper2 |
| chr2  | 74740455  | 74743795  | TLX2       | ENSG00000115297 | 1535  | 0.59 | 0.2  | 1.20E-67 | 0.39 | hyper2 |
| chr2  | 25427101  | 25427577  | AC012457.2 | ENSG00000230452 | 157   | 0.89 | 0.29 | 2.90E-45 | 0.6  | hyper2 |
| chr2  | 108602824 | 108603467 | SLC5A7     | ENSG00000115665 | 166   | 0.7  | 0.13 | 2.30E-44 | 0.57 | hyper2 |



|       |           |           |            |                 |       |      |      |          |      |        |
|-------|-----------|-----------|------------|-----------------|-------|------|------|----------|------|--------|
| chr2  | 24397645  | 24398194  | AC008073.7 | ENSG00000232642 | -267  | 0.8  | 0.3  | 4.60E-44 | 0.49 | hyper2 |
| chr2  | 26407422  | 26408253  | FAM59B     | ENSG00000157833 | -264  | 0.93 | 0.58 | 4.90E-38 | 0.35 | hyper2 |
| chr2  | 157185557 | 157186355 | NR4A2      | ENSG00000153234 | 677   | 0.9  | 0.52 | 4.80E-33 | 0.38 | hyper2 |
| chr2  | 74875128  | 74875562  | C2orf65    | ENSG00000159374 | -181  | 0.88 | 0.38 | 5.50E-28 | 0.5  | hyper2 |
| chr2  | 45179364  | 45180394  | AC012354.6 | ENSG00000225156 | -1924 | 0.69 | 0.27 | 5.10E-27 | 0.41 | hyper2 |
| chr2  | 133426652 | 133428870 | LYPD1      | ENSG00000150551 | -81   | 0.58 | 0.23 | 2.40E-26 | 0.35 | hyper2 |
| chr2  | 119599458 | 119600966 | EN1        | ENSG00000163064 | 1716  | 0.75 | 0.35 | 2.90E-24 | 0.4  | hyper2 |
| chr2  | 113190115 | 113191274 | RGPD8      | ENSG00000169629 | 402   | 0.83 | 0.28 | 3.40E-21 | 0.56 | hyper2 |
| chr2  | 73151200  | 73152060  | EMX1       | ENSG00000135638 | 513   | 0.76 | 0.38 | 7.30E-21 | 0.38 | hyper2 |
| chr2  | 20068428  | 20068907  | AC013400.2 | ENSG00000228784 | 46    | 0.83 | 0.39 | 1.20E-20 | 0.44 | hyper2 |
| chr2  | 21266669  | 21266961  | APOB       | ENSG00000084674 | 2     | 0.87 | 0.27 | 8.30E-19 | 0.6  | hyper2 |
| chr2  | 98340397  | 98340959  | ZAP70      | ENSG00000115085 | -246  | 0.97 | 0.61 | 2.40E-15 | 0.36 | hyper2 |
| chr2  | 55450616  | 55450931  | AC012358.4 | ENSG00000227799 | -643  | 0.54 | 0.2  | 5.80E-15 | 0.34 | hyper2 |
| chr2  | 48844751  | 48844985  | GTF2A1L    | ENSG00000242441 | -69   | 0.95 | 0.58 | 1.40E-12 | 0.37 | hyper2 |
| chr2  | 132558959 | 132559614 | C2orf27B   | ENSG00000186825 | -52   | 0.66 | 0.3  | 1.90E-12 | 0.36 | hyper2 |
| chr2  | 177014948 | 177015214 | MIR10B     | ENSG00000207744 | 50    | 0.84 | 0.28 | 2.10E-12 | 0.56 | hyper2 |
| chr2  | 27305312  | 27305612  | EMILIN1    | ENSG00000138080 | -1001 | 0.69 | 0.23 | 3.20E-12 | 0.46 | hyper2 |
| chr2  | 114256775 | 114258043 | FOXD4L1    | ENSG00000184492 | 748   | 0.86 | 0.42 | 3.20E-11 | 0.44 | hyper2 |
| chr2  | 131009569 | 131010185 | AC068137.2 | ENSG00000236595 | 736   | 0.7  | 0.25 | 3.30E-10 | 0.45 | hyper2 |
| chr20 | 2729997   | 2730797   | EBF4       | ENSG00000088881 | -1940 | 0.79 | 0.2  | 1.10E-64 | 0.59 | hyper2 |
| chr20 | 62462511  | 62464091  | ZBTB46     | ENSG00000130584 | -734  | 0.82 | 0.33 | 1.50E-54 | 0.5  | hyper2 |
| chr20 | 57267527  | 57268420  | NPEPL1     | ENSG00000215440 | 304   | 0.78 | 0.29 | 5.80E-42 | 0.49 | hyper2 |
| chr20 | 57089460  | 57090237  | APCDD1L    | ENSG00000198768 | 105   | 0.7  | 0.15 | 8.10E-34 | 0.56 | hyper2 |
| chr20 | 42543097  | 42545137  | TOX2       | ENSG00000124191 | 625   | 0.63 | 0.25 | 2.30E-33 | 0.38 | hyper2 |
| chr20 | 55964272  | 55964656  | RBM38      | ENSG00000132819 | -1999 | 0.73 | 0.28 | 7.30E-25 | 0.46 | hyper2 |
| chr20 | 62421090  | 62422384  | ZBTB46     | ENSG00000130584 | -525  | 0.92 | 0.55 | 6.90E-22 | 0.37 | hyper2 |
| chr20 | 42143210  | 42143591  | L3MBTL1    | ENSG00000185513 | 52    | 0.84 | 0.37 | 1.40E-14 | 0.46 | hyper2 |
| chr20 | 821674    | 822500    | AL118502.1 | ENSG00000101278 | -1467 | 0.87 | 0.32 | 1.00E-13 | 0.56 | hyper2 |
| chr20 | 34022007  | 34022502  | GDF5OS     | ENSG00000204183 | 1427  | 0.97 | 0.44 | 8.20E-11 | 0.52 | hyper2 |
| chr21 | 34395128  | 34400245  | OLIG2      | ENSG00000205927 | -467  | 0.64 | 0.21 | 9.30E-45 | 0.42 | hyper2 |

|       |           |           |               |                 |       |      |      |          |      |        |
|-------|-----------|-----------|---------------|-----------------|-------|------|------|----------|------|--------|
| chr21 | 28337856  | 28340237  | ADAMTS5       | ENSG00000154736 | -214  | 0.53 | 0.16 | 1.80E-43 | 0.38 | hyper2 |
| chr21 | 45705428  | 45706044  | AIRE          | ENSG00000160224 | 15    | 0.76 | 0.34 | 3.70E-20 | 0.42 | hyper2 |
| chr21 | 34143453  | 34144141  | GCFC1         | ENSG00000159086 | 182   | 0.51 | 0.12 | 1.70E-15 | 0.39 | hyper2 |
| chr22 | 50727441  | 50728654  | PLXNB2        | ENSG00000196576 | -57   | 0.9  | 0.34 | 2.00E-56 | 0.56 | hyper2 |
| chr22 | 50718979  | 50721884  | PLXNB2        | ENSG00000196576 | -1024 | 0.9  | 0.49 | 1.10E-55 | 0.41 | hyper2 |
| chr22 | 20228961  | 20230275  | RTN4R         | ENSG00000040608 | 1589  | 0.97 | 0.38 | 5.40E-54 | 0.59 | hyper2 |
| chr22 | 40390484  | 40391490  | FAM83F        | ENSG00000133477 | 34    | 0.86 | 0.37 | 3.20E-51 | 0.49 | hyper2 |
| chr22 | 24890412  | 24891453  | C22orf45      | ENSG00000178803 | -169  | 0.95 | 0.39 | 3.20E-48 | 0.56 | hyper2 |
| chr22 | 24180491  | 24181666  | DERL3         | ENSG00000099958 | 113   | 0.86 | 0.27 | 1.50E-32 | 0.59 | hyper2 |
| chr22 | 42470035  | 42470669  | FAM109B       | ENSG00000177096 | 97    | 0.79 | 0.37 | 9.40E-31 | 0.42 | hyper2 |
| chr22 | 21821571  | 21824125  | TMEM191C      | ENSG00000206140 | 1168  | 0.93 | 0.36 | 7.70E-29 | 0.57 | hyper2 |
| chr22 | 23605241  | 23605566  | U07000.1      | ENSG00000230701 | 80    | 0.94 | 0.52 | 1.30E-14 | 0.43 | hyper2 |
| chr22 | 43265990  | 43266283  | ARFGAP3       | ENSG00000242247 | 1293  | 0.88 | 0.44 | 3.20E-14 | 0.44 | hyper2 |
| chr22 | 44892393  | 44894049  | LDOC1L        | ENSG00000188636 | 957   | 0.66 | 0.32 | 3.40E-12 | 0.34 | hyper2 |
| chr22 | 24224650  | 24225047  | AP000350.10   | ENSG00000251357 | 202   | 0.78 | 0.26 | 5.80E-12 | 0.51 | hyper2 |
| chr3  | 71802560  | 71804209  | EIF4E3        | ENSG00000163412 | -609  | 0.52 | 0.14 | 1.70E-57 | 0.38 | hyper2 |
| chr3  | 149374709 | 149376300 | RP11-255N4.2  | ENSG00000241313 | 697   | 0.64 | 0.2  | 3.50E-41 | 0.44 | hyper2 |
| chr3  | 47619112  | 47621131  | CSPG5         | ENSG00000114646 | -498  | 0.59 | 0.2  | 1.20E-36 | 0.39 | hyper2 |
| chr3  | 131100341 | 131101151 | NUDT16        | ENSG00000198585 | 231   | 0.78 | 0.22 | 3.90E-36 | 0.56 | hyper2 |
| chr3  | 158449795 | 158450597 | MFSD1         | ENSG00000118855 | 209   | 0.59 | 0.2  | 8.30E-31 | 0.39 | hyper2 |
| chr3  | 139396338 | 139396882 | NMNAT3        | ENSG00000163864 | -50   | 0.7  | 0.19 | 5.80E-28 | 0.51 | hyper2 |
| chr3  | 42727084  | 42727916  | KBTBD5        | ENSG00000157119 | 471   | 0.82 | 0.37 | 2.40E-27 | 0.44 | hyper2 |
| chr3  | 46037013  | 46037473  | FYCO1         | ENSG00000163820 | 64    | 0.73 | 0.16 | 1.40E-22 | 0.57 | hyper2 |
| chr3  | 50402103  | 50402942  | CACNA2D2      | ENSG00000007402 | 691   | 0.92 | 0.54 | 2.80E-18 | 0.38 | hyper2 |
| chr3  | 113160299 | 113160641 | WDR52         | ENSG00000206530 | -110  | 0.97 | 0.6  | 5.10E-15 | 0.37 | hyper2 |
| chr3  | 11610137  | 11610370  | VGLL4         | ENSG00000144560 | 145   | 0.97 | 0.45 | 2.10E-14 | 0.52 | hyper2 |
| chr3  | 62356119  | 62356378  | RP11-204J18.3 | ENSG00000241472 | -1243 | 0.96 | 0.39 | 2.80E-12 | 0.57 | hyper2 |
| chr3  | 98376316  | 98376542  | RP11-569H14.1 | ENSG00000244153 | -217  | 0.74 | 0.25 | 8.90E-12 | 0.49 | hyper2 |
| chr3  | 46853727  | 46854138  | PRSS45        | ENSG00000188086 | 116   | 0.56 | 0.19 | 6.70E-11 | 0.37 | hyper2 |
| chr3  | 184971641 | 184972002 | EHHADH        | ENSG00000113790 | -2    | 0.58 | 0.2  | 1.60E-10 | 0.38 | hyper2 |

|      |           |           |                |                 |       |      |      |          |      |        |
|------|-----------|-----------|----------------|-----------------|-------|------|------|----------|------|--------|
| chr3 | 196693765 | 196694200 | PIGZ           | ENSG00000119227 | 1722  | 0.97 | 0.54 | 7.40E-10 | 0.43 | hyper2 |
| chr3 | 32861141  | 32861429  | TRIM71         | ENSG00000206557 | 1775  | 0.88 | 0.3  | 7.50E-10 | 0.59 | hyper2 |
| chr4 | 982814    | 984189    | SLC26A1        | ENSG00000145217 | 1482  | 0.94 | 0.47 | 1.80E-64 | 0.48 | hyper2 |
| chr4 | 183063396 | 183066370 | AC108142.1     | ENSG00000177822 | 46    | 0.55 | 0.21 | 1.70E-52 | 0.34 | hyper2 |
| chr4 | 81109887  | 81110460  | RP11-377G16.2  | ENSG00000248719 | 1150  | 0.94 | 0.36 | 6.10E-39 | 0.58 | hyper2 |
| chr4 | 155702340 | 155703328 | RBM46          | ENSG00000151962 | 469   | 0.84 | 0.44 | 2.10E-37 | 0.4  | hyper2 |
| chr4 | 151500763 | 151501299 | RP11-1336O20.2 | ENSG00000249690 | 790   | 0.97 | 0.49 | 2.10E-33 | 0.49 | hyper2 |
| chr4 | 174448333 | 174448845 | RP11-471J12.1  | ENSG00000237125 | 168   | 0.87 | 0.35 | 4.70E-26 | 0.52 | hyper2 |
| chr4 | 2366421   | 2367092   | ZFYVE28        | ENSG00000159733 | -225  | 0.98 | 0.44 | 4.30E-25 | 0.54 | hyper2 |
| chr4 | 40631740  | 40632587  | RBM47          | ENSG00000163694 | -282  | 0.52 | 0.16 | 1.10E-17 | 0.35 | hyper2 |
| chr4 | 206377    | 206892    | ZNF876P        | ENSG00000198155 | 235   | 0.72 | 0.27 | 1.80E-15 | 0.45 | hyper2 |
| chr4 | 110222970 | 110224257 | COL25A1        | ENSG00000188517 | -438  | 0.52 | 0.18 | 1.00E-14 | 0.35 | hyper2 |
| chr4 | 4859632   | 4860191   | MSX1           | ENSG00000163132 | -1482 | 0.95 | 0.47 | 3.50E-14 | 0.48 | hyper2 |
| chr4 | 38016153  | 38016441  | TBC1D1         | ENSG00000065882 | -207  | 0.98 | 0.62 | 5.60E-14 | 0.36 | hyper2 |
| chr4 | 1304768   | 1305114   | MAEA           | ENSG00000090316 | 1366  | 0.97 | 0.54 | 1.10E-13 | 0.43 | hyper2 |
| chr4 | 137277210 | 137277487 | TERF1P3        | ENSG00000249311 | -44   | 0.78 | 0.33 | 1.10E-12 | 0.45 | hyper2 |
| chr4 | 25865063  | 25865376  | SEL1L3         | ENSG00000091490 | -60   | 0.56 | 0.16 | 1.30E-10 | 0.4  | hyper2 |
| chr5 | 68710807  | 68711520  | MARVELD2       | ENSG00000152939 | 224   | 0.86 | 0.45 | 3.70E-50 | 0.41 | hyper2 |
| chr5 | 58334836  | 58335881  | PDE4D          | ENSG00000113448 | -19   | 0.58 | 0.17 | 2.50E-49 | 0.41 | hyper2 |
| chr5 | 132148854 | 132150918 | ANKRD43        | ENSG00000198944 | 853   | 0.75 | 0.41 | 6.40E-48 | 0.34 | hyper2 |
| chr5 | 132158542 | 132159203 | SHROOM1        | ENSG00000164403 | 625   | 0.61 | 0.17 | 1.70E-39 | 0.44 | hyper2 |
| chr5 | 140810494 | 140812617 | PCDHGA12       | ENSG00000253159 | 1370  | 0.87 | 0.53 | 7.50E-37 | 0.34 | hyper2 |
| chr5 | 76115510  | 76116089  | F2RL1          | ENSG00000164251 | 997   | 0.81 | 0.27 | 6.50E-33 | 0.54 | hyper2 |
| chr5 | 131607018 | 131607889 | PDLIM4         | ENSG00000131435 | 788   | 0.99 | 0.51 | 4.30E-32 | 0.48 | hyper2 |
| chr5 | 140256273 | 140257290 | PCDHA12        | ENSG00000251664 | 1723  | 0.91 | 0.57 | 3.40E-29 | 0.34 | hyper2 |
| chr5 | 167956219 | 167957371 | FBLL1          | ENSG00000188573 | 285   | 0.69 | 0.3  | 1.20E-28 | 0.4  | hyper2 |
| chr5 | 122433878 | 122435551 | PRDM6          | ENSG00000061455 | -726  | 0.63 | 0.26 | 5.10E-28 | 0.37 | hyper2 |
| chr5 | 140768939 | 140769483 | PCDHGB4        | ENSG00000253953 | 1759  | 0.85 | 0.44 | 5.20E-25 | 0.42 | hyper2 |
| chr5 | 132082873 | 132083911 | CCNI2          | ENSG00000205089 | 255   | 0.58 | 0.23 | 2.50E-24 | 0.36 | hyper2 |
| chr5 | 140214068 | 140214464 | PCDHA7         | ENSG00000204963 | 297   | 0.94 | 0.42 | 1.40E-20 | 0.52 | hyper2 |

|      |           |           |              |                 |       |      |      |          |      |        |
|------|-----------|-----------|--------------|-----------------|-------|------|------|----------|------|--------|
| chr5 | 140723548 | 140723900 | PCDHGA3      | ENSG00000254245 | 123   | 0.88 | 0.37 | 4.50E-20 | 0.51 | hyper2 |
| chr5 | 134914178 | 134914981 | CXCL14       | ENSG00000145824 | 175   | 0.61 | 0.18 | 9.30E-19 | 0.42 | hyper2 |
| chr5 | 75377898  | 75378189  | SV2C         | ENSG00000122012 | -954  | 0.84 | 0.23 | 2.10E-17 | 0.6  | hyper2 |
| chr5 | 7849945   | 7850439   | C5orf49      | ENSG00000215217 | 1072  | 0.88 | 0.38 | 7.40E-17 | 0.5  | hyper2 |
| chr5 | 140221007 | 140221381 | PCDHA8       | ENSG00000204962 | 287   | 0.97 | 0.49 | 3.30E-15 | 0.48 | hyper2 |
| chr5 | 72740051  | 72740800  | RP11-79P5.2  | ENSG00000247993 | -1759 | 0.96 | 0.42 | 4.80E-15 | 0.54 | hyper2 |
| chr5 | 139060555 | 139060934 | CXXC5        | ENSG00000171604 | 201   | 0.66 | 0.19 | 8.60E-15 | 0.47 | hyper2 |
| chr5 | 176314451 | 176314662 | HK3          | ENSG00000160883 | 1092  | 0.78 | 0.29 | 7.60E-13 | 0.49 | hyper2 |
| chr5 | 11384681  | 11385521  | CTNND2       | ENSG00000169862 | -218  | 0.56 | 0.21 | 5.80E-12 | 0.35 | hyper2 |
| chr5 | 179228283 | 179229003 | MGAT4B       | ENSG00000161013 | -276  | 0.88 | 0.38 | 2.70E-10 | 0.5  | hyper2 |
| chr6 | 36355277  | 36356016  | ETV7         | ENSG0000010030  | -153  | 0.77 | 0.22 | 1.20E-44 | 0.55 | hyper2 |
| chr6 | 137814355 | 137815202 | OLIG3        | ENSG00000177468 | 753   | 0.72 | 0.18 | 3.80E-38 | 0.54 | hyper2 |
| chr6 | 2841810   | 2842273   | SERPINB1     | ENSG00000021355 | 41    | 0.72 | 0.31 | 6.20E-28 | 0.41 | hyper2 |
| chr6 | 137816474 | 137817223 | OLIG3        | ENSG00000177468 | -1317 | 0.92 | 0.51 | 5.90E-26 | 0.41 | hyper2 |
| chr6 | 112688077 | 112688730 | FEM1AP3      | ENSG00000217770 | 243   | 0.97 | 0.59 | 6.70E-24 | 0.38 | hyper2 |
| chr6 | 35108801  | 35109499  | TCP11        | ENSG00000124678 | -346  | 0.83 | 0.34 | 1.30E-22 | 0.48 | hyper2 |
| chr6 | 49518315  | 49519186  | C6orf141     | ENSG00000197261 | 371   | 0.61 | 0.18 | 1.50E-21 | 0.42 | hyper2 |
| chr6 | 4079052   | 4079443   | C6orf146     | ENSG00000145975 | 87    | 0.98 | 0.54 | 1.20E-19 | 0.44 | hyper2 |
| chr6 | 2903175   | 2903906   | SERPINB9     | ENSG00000170542 | -26   | 0.58 | 0.19 | 5.50E-19 | 0.39 | hyper2 |
| chr6 | 10417384  | 10417842  | TFAP2A       | ENSG00000137203 | -173  | 0.79 | 0.31 | 4.10E-18 | 0.48 | hyper2 |
| chr6 | 42694963  | 42695631  | ATP6V0CP3    | ENSG00000213435 | 325   | 0.91 | 0.36 | 1.80E-14 | 0.55 | hyper2 |
| chr6 | 84140412  | 84140998  | ME1          | ENSG00000065833 | 59    | 0.5  | 0.17 | 2.40E-14 | 0.34 | hyper2 |
| chr6 | 108491033 | 108491410 | NR2E1        | ENSG00000112333 | 1254  | 0.86 | 0.4  | 4.40E-14 | 0.47 | hyper2 |
| chr6 | 129251113 | 129251319 | MESTP1       | ENSG00000220884 | -82   | 0.98 | 0.6  | 4.10E-13 | 0.38 | hyper2 |
| chr6 | 134159126 | 134159349 | RP4-662A9.2  | ENSG00000223586 | 915   | 0.72 | 0.32 | 1.10E-12 | 0.4  | hyper2 |
| chr6 | 43612714  | 43613366  | RSPH9        | ENSG00000172426 | 257   | 0.82 | 0.32 | 7.60E-12 | 0.5  | hyper2 |
| chr6 | 158937285 | 158937491 | RP11-107N4.1 | ENSG00000219188 | -127  | 0.82 | 0.47 | 1.10E-11 | 0.36 | hyper2 |
| chr7 | 157405009 | 157406608 | AC005481.5   | ENSG00000222012 | -907  | 0.97 | 0.56 | 4.10E-86 | 0.41 | hyper2 |
| chr7 | 150496809 | 150498206 | TMEM176B     | ENSG00000106565 | -67   | 0.9  | 0.31 | 1.50E-77 | 0.59 | hyper2 |
| chr7 | 99768884  | 99769559  | GPC2         | ENSG00000213420 | 620   | 0.81 | 0.24 | 1.90E-67 | 0.58 | hyper2 |

|      |           |           |                |                 |       |      |      |          |      |        |
|------|-----------|-----------|----------------|-----------------|-------|------|------|----------|------|--------|
| chr7 | 23245556  | 23246161  | AC005082.12    | ENSG00000226816 | 226   | 0.89 | 0.3  | 4.60E-52 | 0.6  | hyper2 |
| chr7 | 103085710 | 103086132 | CTB-107G13.1   | ENSG00000234715 | 267   | 0.96 | 0.38 | 2.60E-39 | 0.58 | hyper2 |
| chr7 | 43288634  | 43288948  | HECW1          | ENSG00000002746 | 55    | 0.87 | 0.3  | 1.60E-25 | 0.57 | hyper2 |
| chr7 | 95025559  | 95026122  | PON1           | ENSG00000005421 | -167  | 0.8  | 0.32 | 1.90E-20 | 0.47 | hyper2 |
| chr7 | 47092244  | 47093076  | AC004870.5     | ENSG00000214754 | 269   | 0.98 | 0.61 | 1.10E-17 | 0.38 | hyper2 |
| chr7 | 27162087  | 27162426  | AC004080.12    | ENSG00000253552 | 89    | 0.75 | 0.21 | 6.50E-16 | 0.55 | hyper2 |
| chr7 | 154585682 | 154586336 | DPP6           | ENSG00000130226 | 574   | 0.96 | 0.61 | 1.20E-15 | 0.36 | hyper2 |
| chr7 | 4901336   | 4901753   | PAPOLB         | ENSG00000218823 | 81    | 0.97 | 0.57 | 6.90E-14 | 0.4  | hyper2 |
| chr7 | 27198182  | 27198514  | HOXA7          | ENSG00000122592 | -793  | 0.92 | 0.4  | 9.50E-12 | 0.52 | hyper2 |
| chr7 | 140135364 | 140135620 | RP11-723C11.2  | ENSG00000103200 | 95    | 0.97 | 0.44 | 1.80E-11 | 0.53 | hyper2 |
| chr7 | 99195683  | 99196001  | GS1-259H13.2   | ENSG00000244219 | 153   | 0.84 | 0.46 | 6.00E-10 | 0.38 | hyper2 |
| chr7 | 124404174 | 124404432 | GPR37          | ENSG00000170775 | 1378  | 0.98 | 0.61 | 8.60E-10 | 0.36 | hyper2 |
| chr7 | 601121    | 601729    | AC147651.5     | ENSG00000229380 | -170  | 0.67 | 0.31 | 1.00E-09 | 0.36 | hyper2 |
| chr8 | 145555342 | 145562310 | SCRT1          | ENSG00000170616 | 1117  | 0.68 | 0.24 | 4.30E-85 | 0.43 | hyper2 |
| chr8 | 70981873  | 70984888  | PRDM14         | ENSG00000147596 | 182   | 0.67 | 0.26 | 3.70E-48 | 0.41 | hyper2 |
| chr8 | 144788491 | 144791059 | ZNF707         | ENSG00000181135 | -446  | 0.87 | 0.46 | 9.60E-48 | 0.41 | hyper2 |
| chr8 | 65281903  | 65283043  | RP11-32K4.1    | ENSG00000253554 | -1358 | 0.83 | 0.33 | 2.60E-46 | 0.5  | hyper2 |
| chr8 | 11565217  | 11567212  | GATA4          | ENSG00000136574 | 683   | 0.65 | 0.22 | 1.40E-42 | 0.42 | hyper2 |
| chr8 | 38831592  | 38832353  | HTRA4          | ENSG00000169495 | 289   | 0.66 | 0.17 | 3.70E-37 | 0.49 | hyper2 |
| chr8 | 145730390 | 145732205 | CTD-2517M22.14 | ENSG00000255182 | -816  | 0.89 | 0.38 | 3.20E-30 | 0.51 | hyper2 |
| chr8 | 8559131   | 8560867   | CLDN23         | ENSG00000253958 | 551   | 0.77 | 0.37 | 4.20E-29 | 0.4  | hyper2 |
| chr8 | 144659745 | 144660635 | NAPRT1         | ENSG00000147813 | -105  | 0.65 | 0.29 | 2.10E-26 | 0.36 | hyper2 |
| chr8 | 54791845  | 54795141  | RGS20          | ENSG00000147509 | 1049  | 0.72 | 0.37 | 7.30E-24 | 0.36 | hyper2 |
| chr8 | 102505512 | 102506430 | GRHL2          | ENSG00000083307 | 985   | 0.68 | 0.29 | 1.20E-19 | 0.39 | hyper2 |
| chr8 | 99438692  | 99440425  | KCNS2          | ENSG00000156486 | 308   | 0.59 | 0.22 | 1.50E-19 | 0.36 | hyper2 |
| chr8 | 23021056  | 23021588  | TNFRSF10D      | ENSG00000173530 | 221   | 0.65 | 0.2  | 4.30E-19 | 0.45 | hyper2 |
| chr8 | 31496525  | 31498346  | NRG1           | ENSG00000157168 | 533   | 0.53 | 0.18 | 6.20E-19 | 0.35 | hyper2 |
| chr8 | 145114550 | 145115828 | OPLAH          | ENSG00000178814 | 395   | 0.65 | 0.31 | 1.30E-18 | 0.34 | hyper2 |
| chr8 | 146126088 | 146128055 | ZNF250         | ENSG00000196150 | -264  | 0.71 | 0.23 | 4.90E-18 | 0.48 | hyper2 |
| chr8 | 145577098 | 145578142 | GS1-393G12.10  | ENSG00000214597 | 110   | 0.98 | 0.57 | 2.10E-17 | 0.41 | hyper2 |

|       |           |           |               |                 |       |      |      |          |      |        |
|-------|-----------|-----------|---------------|-----------------|-------|------|------|----------|------|--------|
| chr8  | 110986113 | 110986983 | RP11-696P8.2  | ENSG00000255402 | 376   | 0.67 | 0.17 | 2.20E-13 | 0.5  | hyper2 |
| chr8  | 96085269  | 96085747  | RP11-320N21.1 | ENSG00000245080 | -98   | 0.81 | 0.27 | 1.90E-12 | 0.54 | hyper2 |
| chr8  | 145747509 | 145748682 | LRRC14        | ENSG00000160959 | 129   | 0.57 | 0.18 | 2.10E-10 | 0.38 | hyper2 |
| chr8  | 145024449 | 145025179 | PLEC          | ENSG00000178209 | 230   | 0.65 | 0.27 | 3.40E-10 | 0.38 | hyper2 |
| chr9  | 37034135  | 37038341  | PAX5          | ENSG00000196092 | -1762 | 0.55 | 0.21 | 2.40E-50 | 0.34 | hyper2 |
| chr9  | 136294738 | 136295236 | ADAMTS13      | ENSG00000160323 | 1236  | 0.83 | 0.32 | 7.70E-29 | 0.51 | hyper2 |
| chr9  | 119449473 | 119449767 | ASTN2         | ENSG00000148219 | -126  | 0.75 | 0.17 | 1.30E-26 | 0.58 | hyper2 |
| chr9  | 141044508 | 141045113 | TUBBP5        | ENSG00000159247 | 245   | 0.76 | 0.29 | 1.30E-25 | 0.48 | hyper2 |
| chr9  | 139888934 | 139890343 | CLIC3         | ENSG00000169583 | 561   | 0.84 | 0.47 | 1.00E-24 | 0.38 | hyper2 |
| chr9  | 23822412  | 23822667  | ELAVL2        | ENSG00000107105 | -693  | 0.94 | 0.35 | 3.50E-17 | 0.59 | hyper2 |
| chr9  | 139925243 | 139925996 | FUT7          | ENSG00000180549 | 1843  | 0.84 | 0.38 | 1.10E-16 | 0.45 | hyper2 |
| chr9  | 130980900 | 130981317 | DNM1          | ENSG00000106976 | 560   | 0.83 | 0.27 | 2.90E-15 | 0.56 | hyper2 |
| chr9  | 123631106 | 123631672 | PHF19         | ENSG00000119403 | -273  | 0.84 | 0.44 | 9.00E-14 | 0.4  | hyper2 |
| chr9  | 72658836  | 72659277  | MAMDC2        | ENSG00000165072 | 559   | 0.72 | 0.27 | 7.30E-12 | 0.46 | hyper2 |
| chr1  | 62660555  | 62660946  | L1TD1         | ENSG00000240563 | 247   | 0.82 | 0.15 | 4.40E-40 | 0.67 | hyper3 |
| chr1  | 21948674  | 21949263  | RAP1GAP       | ENSG00000076864 | -62   | 0.94 | 0.3  | 8.10E-40 | 0.64 | hyper3 |
| chr1  | 227163739 | 227164237 | ADCK3         | ENSG00000163050 | -1117 | 0.97 | 0.25 | 3.70E-36 | 0.73 | hyper3 |
| chr1  | 226127112 | 226127695 | LEFTY2        | ENSG00000143768 | 398   | 0.9  | 0.29 | 1.10E-33 | 0.61 | hyper3 |
| chr1  | 151812253 | 151812525 | C2CD4D        | ENSG00000225556 | 644   | 0.97 | 0.29 | 1.30E-32 | 0.69 | hyper3 |
| chr1  | 117077042 | 117077299 | NAP1L4P1      | ENSG00000177173 | -456  | 0.97 | 0.32 | 1.20E-24 | 0.66 | hyper3 |
| chr1  | 23884842  | 23885087  | ID3           | ENSG00000117318 | 602   | 0.92 | 0.24 | 2.00E-22 | 0.69 | hyper3 |
| chr1  | 60539315  | 60539540  | C1orf87       | ENSG00000162598 | -19   | 0.98 | 0.24 | 6.10E-22 | 0.74 | hyper3 |
| chr1  | 228785986 | 228786204 | DUSP5P        | ENSG00000183929 | 107   | 0.96 | 0.31 | 2.70E-20 | 0.65 | hyper3 |
| chr1  | 2235308   | 2235667   | SKI           | ENSG00000157933 | 402   | 1    | 0.27 | 3.00E-20 | 0.73 | hyper3 |
| chr1  | 175161900 | 175162364 | KIAA0040      | ENSG00000235750 | -203  | 0.85 | 0.16 | 3.40E-17 | 0.69 | hyper3 |
| chr1  | 41283840  | 41284591  | KCNQ4         | ENSG00000117013 | -421  | 0.91 | 0.27 | 6.80E-13 | 0.64 | hyper3 |
| chr1  | 156358050 | 156358252 | RP11-139I14.2 | ENSG00000237390 | 133   | 0.83 | 0.12 | 1.80E-11 | 0.72 | hyper3 |
| chr1  | 155290606 | 155291001 | RUSC1         | ENSG00000160753 | 116   | 0.88 | 0.15 | 1.90E-11 | 0.73 | hyper3 |
| chr10 | 51572198  | 51572620  | NCOA4         | ENSG00000138293 | 42    | 0.97 | 0.16 | 2.60E-79 | 0.81 | hyper3 |
| chr10 | 104170168 | 104170872 | PSD           | ENSG00000059915 | 993   | 0.9  | 0.19 | 5.00E-52 | 0.7  | hyper3 |

|       |           |           |               |                 |       |      |      |          |      |        |
|-------|-----------|-----------|---------------|-----------------|-------|------|------|----------|------|--------|
| chr10 | 11207178  | 11207980  | CELF2         | ENSG00000048740 | 88    | 0.98 | 0.21 | 1.50E-48 | 0.77 | hyper3 |
| chr10 | 94351356  | 94351615  | KIF11         | ENSG00000138160 | -1558 | 0.91 | 0.21 | 6.50E-38 | 0.71 | hyper3 |
| chr10 | 101290025 | 101290338 | RP11-129J12.2 | ENSG00000257582 | 753   | 0.8  | 0.17 | 2.00E-12 | 0.63 | hyper3 |
| chr11 | 47611138  | 47612438  | C1QTNF4       | ENSG00000172247 | 574   | 0.98 | 0.36 | 5.90E-97 | 0.61 | hyper3 |
| chr11 | 57243681  | 57244463  | RP11-624G17.3 | ENSG00000255301 | 935   | 0.88 | 0.22 | 1.10E-81 | 0.66 | hyper3 |
| chr11 | 32452144  | 32452708  | WT1           | ENSG00000184937 | -67   | 0.93 | 0.22 | 3.40E-61 | 0.71 | hyper3 |
| chr11 | 73053648  | 73054302  | ARHGEF17      | ENSG00000110237 | -66   | 0.94 | 0.16 | 3.60E-51 | 0.79 | hyper3 |
| chr11 | 1464295   | 1464899   | BRSK2         | ENSG00000174672 | 837   | 0.88 | 0.24 | 1.30E-47 | 0.64 | hyper3 |
| chr11 | 14926471  | 14927770  | CALCB         | ENSG00000175868 | 577   | 0.87 | 0.22 | 5.20E-43 | 0.65 | hyper3 |
| chr11 | 6340445   | 6341909   | PRKCDBP       | ENSG00000170955 | 115   | 0.94 | 0.27 | 3.10E-40 | 0.67 | hyper3 |
| chr11 | 74178175  | 74178801  | KCNE3         | ENSG00000175538 | 106   | 0.93 | 0.24 | 5.80E-35 | 0.69 | hyper3 |
| chr11 | 65123373  | 65123705  | TIGD3         | ENSG00000173825 | 1301  | 0.96 | 0.22 | 1.20E-23 | 0.74 | hyper3 |
| chr11 | 66410925  | 66411587  | RBM4          | ENSG00000173933 | 35    | 0.94 | 0.2  | 1.20E-22 | 0.74 | hyper3 |
| chr11 | 113185332 | 113185663 | TTC12         | ENSG00000149292 | -36   | 0.83 | 0.21 | 4.10E-16 | 0.62 | hyper3 |
| chr11 | 123066517 | 123066986 | CLMP          | ENSG00000166250 | -762  | 0.93 | 0.3  | 1.40E-15 | 0.63 | hyper3 |
| chr11 | 94965357  | 94965588  | SESN3         | ENSG00000149212 | 167   | 0.79 | 0.11 | 1.20E-14 | 0.68 | hyper3 |
| chr12 | 121711846 | 121712162 | CAMKK2        | ENSG00000110931 | 169   | 0.96 | 0.12 | 2.60E-62 | 0.84 | hyper3 |
| chr12 | 107974842 | 107975305 | BTBD11        | ENSG00000151136 | 646   | 0.9  | 0.24 | 6.50E-29 | 0.66 | hyper3 |
| chr12 | 6756001   | 6756679   | ACRBP         | ENSG00000111644 | 109   | 0.79 | 0.14 | 2.90E-21 | 0.65 | hyper3 |
| chr12 | 114840853 | 114841063 | TBX5          | ENSG00000089225 | 745   | 0.88 | 0.25 | 7.90E-14 | 0.62 | hyper3 |
| chr12 | 54389113  | 54389520  | HOXC9         | ENSG00000180806 | 23    | 0.91 | 0.26 | 1.50E-12 | 0.65 | hyper3 |
| chr13 | 102106165 | 102106488 | ITGBL1        | ENSG00000198542 | 1308  | 0.91 | 0.22 | 1.10E-36 | 0.7  | hyper3 |
| chr13 | 92051153  | 92051716  | GPC5          | ENSG00000179399 | 505   | 0.86 | 0.21 | 2.50E-24 | 0.65 | hyper3 |
| chr13 | 97646394  | 97646737  | OXGR1         | ENSG00000165621 | 39    | 0.82 | 0.11 | 2.90E-24 | 0.71 | hyper3 |
| chr15 | 90039464  | 90039984  | RHCG          | ENSG00000140519 | 51    | 0.98 | 0.27 | 2.60E-50 | 0.71 | hyper3 |
| chr16 | 56669037  | 56669727  | MT1JP         | ENSG00000255986 | -269  | 0.82 | 0.21 | 1.30E-50 | 0.61 | hyper3 |
| chr16 | 1429050   | 1430104   | UNKL          | ENSG00000059145 | -455  | 0.79 | 0.18 | 6.60E-39 | 0.61 | hyper3 |
| chr16 | 10912159  | 10912719  | FAM18A        | ENSG00000166676 | 18    | 0.93 | 0.21 | 2.10E-29 | 0.71 | hyper3 |
| chr17 | 36717727  | 36718593  | SRCIN1        | ENSG00000017373 | 1500  | 0.97 | 0.19 | 3.30E-82 | 0.77 | hyper3 |
| chr17 | 40700164  | 40700859  | HSD17B1P1     | ENSG00000108785 | 1740  | 0.89 | 0.29 | 6.30E-42 | 0.61 | hyper3 |

|       |           |           |                |                 |      |      |      |           |      |        |
|-------|-----------|-----------|----------------|-----------------|------|------|------|-----------|------|--------|
| chr17 | 80402369  | 80402751  | C17orf62       | ENSG00000178927 | 502  | 0.92 | 0.29 | 2.80E-23  | 0.64 | hyper3 |
| chr17 | 48183257  | 48183478  | PDK2           | ENSG00000005882 | -438 | 0.95 | 0.15 | 3.70E-23  | 0.8  | hyper3 |
| chr17 | 46800945  | 46801288  | HOXB13-AS1     | ENSG00000229637 | 62   | 0.91 | 0.23 | 2.60E-20  | 0.68 | hyper3 |
| chr17 | 17124698  | 17124931  | FLCN           | ENSG00000154803 | 1622 | 0.94 | 0.08 | 1.00E-17  | 0.86 | hyper3 |
| chr17 | 79255960  | 79256323  | SLC38A10       | ENSG00000157637 | -125 | 0.88 | 0.25 | 8.00E-13  | 0.63 | hyper3 |
| chr19 | 46915311  | 46915802  | CCDC8          | ENSG00000169515 | 1270 | 0.94 | 0.24 | 1.60E-60  | 0.7  | hyper3 |
| chr19 | 55997776  | 55998219  | NAT14          | ENSG00000090971 | 1403 | 0.81 | 0.16 | 6.30E-59  | 0.64 | hyper3 |
| chr19 | 35531780  | 35531991  | HPN            | ENSG00000105707 | 475  | 0.77 | 0.16 | 4.30E-14  | 0.61 | hyper3 |
| chr2  | 162279835 | 162280709 | AC009487.4     | ENSG00000224076 | -184 | 0.94 | 0.22 | 1.10E-105 | 0.72 | hyper3 |
| chr2  | 54086776  | 54087266  | ASB3           | ENSG00000115239 | 36   | 0.89 | 0.23 | 2.10E-89  | 0.66 | hyper3 |
| chr2  | 66672431  | 66673636  | MEIS1          | ENSG00000143995 | 708  | 0.97 | 0.24 | 8.40E-89  | 0.72 | hyper3 |
| chr2  | 27665251  | 27665670  | KRTCAP3        | ENSG00000157992 | 195  | 0.88 | 0.21 | 9.60E-75  | 0.67 | hyper3 |
| chr2  | 58273642  | 58274422  | VRK2           | ENSG00000028116 | 380  | 0.87 | 0.21 | 9.30E-66  | 0.66 | hyper3 |
| chr2  | 237476311 | 237477263 | CXCR7          | ENSG00000144476 | 357  | 0.92 | 0.3  | 7.00E-63  | 0.63 | hyper3 |
| chr2  | 177017266 | 177017489 | HOXD4          | ENSG00000170166 | 353  | 0.9  | 0.19 | 6.40E-31  | 0.71 | hyper3 |
| chr2  | 48982621  | 48982958  | LHCGR          | ENSG00000138039 | -81  | 0.99 | 0.38 | 5.10E-27  | 0.61 | hyper3 |
| chr2  | 97505219  | 97505600  | ANKRD23        | ENSG00000163126 | 1570 | 0.92 | 0.17 | 9.50E-19  | 0.75 | hyper3 |
| chr2  | 3642547   | 3642751   | COLEC11        | ENSG00000118004 | 10   | 0.85 | 0.24 | 5.20E-13  | 0.61 | hyper3 |
| chr2  | 85640969  | 85641259  | CAPG           | ENSG00000042493 | -17  | 0.98 | 0.37 | 5.40E-11  | 0.61 | hyper3 |
| chr2  | 220406363 | 220406840 | CHPF           | ENSG00000123989 | 1218 | 0.91 | 0.28 | 7.70E-11  | 0.63 | hyper3 |
| chr20 | 44879699  | 44880288  | CDH22          | ENSG00000149654 | 341  | 0.92 | 0.23 | 2.60E-76  | 0.69 | hyper3 |
| chr20 | 3148649   | 3149060   | RP5-1187M17.10 | ENSG00000088899 | 353  | 0.93 | 0.25 | 3.80E-28  | 0.68 | hyper3 |
| chr20 | 55839287  | 55839766  | BMP7           | ENSG00000101144 | 1308 | 0.96 | 0.24 | 7.80E-24  | 0.72 | hyper3 |
| chr20 | 62550713  | 62551523  | AL118506.2     | ENSG00000216164 | 385  | 0.87 | 0.12 | 1.00E-18  | 0.76 | hyper3 |
| chr20 | 56725857  | 56726113  | C20orf85       | ENSG00000124237 | 25   | 0.92 | 0.3  | 2.20E-18  | 0.62 | hyper3 |
| chr20 | 35443916  | 35444587  | KIAA0889       | ENSG00000149639 | 433  | 0.96 | 0.15 | 7.30E-12  | 0.8  | hyper3 |
| chr21 | 26934423  | 26934805  | MIR155HG       | ENSG00000234883 | 393  | 0.94 | 0.19 | 1.00E-39  | 0.75 | hyper3 |
| chr21 | 35831697  | 35832365  | KCNE1          | ENSG00000180509 | -129 | 0.86 | 0.23 | 1.20E-35  | 0.63 | hyper3 |
| chr21 | 44105237  | 44105532  | PDE9A          | ENSG00000160191 | -923 | 0.95 | 0.32 | 4.80E-17  | 0.63 | hyper3 |
| chr22 | 19753312  | 19755013  | TBX1           | ENSG00000184058 | 1560 | 0.91 | 0.25 | 1.80E-168 | 0.66 | hyper3 |



|       |           |           |                |                 |       |      |      |           |      |        |
|-------|-----------|-----------|----------------|-----------------|-------|------|------|-----------|------|--------|
| chr22 | 38220589  | 38221619  | GALR3          | ENSG00000128310 | 1715  | 0.92 | 0.21 | 9.60E-75  | 0.71 | hyper3 |
| chr22 | 30476012  | 30476530  | HORMAD2        | ENSG00000176635 | 108   | 0.94 | 0.28 | 7.70E-43  | 0.66 | hyper3 |
| chr22 | 50885457  | 50885710  | SBF1           | ENSG00000100241 | 455   | 0.78 | 0.16 | 2.30E-15  | 0.62 | hyper3 |
| chr22 | 42353659  | 42353900  | CTA-250D10.15  | ENSG00000205704 | -417  | 0.91 | 0.24 | 1.10E-14  | 0.67 | hyper3 |
| chr3  | 134031662 | 134032591 | RP11-200A1.1   | ENSG00000240006 | -292  | 0.97 | 0.28 | 3.30E-64  | 0.69 | hyper3 |
| chr3  | 184056419 | 184056671 | FAM131A        | ENSG00000175182 | -72   | 0.96 | 0.23 | 4.10E-47  | 0.73 | hyper3 |
| chr3  | 350660    | 350893    | RP11-306H5.1   | ENSG00000231660 | 229   | 0.98 | 0.26 | 1.50E-28  | 0.72 | hyper3 |
| chr3  | 133464949 | 133465420 | TF             | ENSG00000091513 | 12    | 0.92 | 0.18 | 8.20E-28  | 0.74 | hyper3 |
| chr3  | 62356773  | 62357315  | FEZF2          | ENSG00000153266 | 1646  | 0.93 | 0.27 | 1.10E-22  | 0.66 | hyper3 |
| chr3  | 131080578 | 131081191 | NUDT16P1       | ENSG00000246082 | 142   | 1    | 0.2  | 1.40E-21  | 0.8  | hyper3 |
| chr3  | 184099095 | 184099582 | CHRD           | ENSG00000090539 | 144   | 1    | 0.18 | 1.50E-20  | 0.82 | hyper3 |
| chr3  | 50377803  | 50378540  | RASSF1         | ENSG00000068028 | 90    | 0.87 | 0.25 | 2.20E-20  | 0.61 | hyper3 |
| chr3  | 131245721 | 131246021 | RP11-517B11.2  | ENSG00000248530 | 580   | 0.88 | 0.23 | 1.40E-19  | 0.64 | hyper3 |
| chr4  | 48492117  | 48493589  | ZAR1           | ENSG00000182223 | 584   | 0.91 | 0.15 | 1.40E-212 | 0.76 | hyper3 |
| chr4  | 144833114 | 144833512 | RP11-673E1.3   | ENSG00000249741 | -105  | 0.89 | 0.24 | 1.00E-55  | 0.65 | hyper3 |
| chr4  | 1994662   | 1994872   | WHSC2          | ENSG00000185049 | -416  | 0.96 | 0.16 | 1.70E-29  | 0.8  | hyper3 |
| chr4  | 1303490   | 1303835   | MAEA           | ENSG00000090316 | 87    | 0.79 | 0.11 | 4.00E-27  | 0.68 | hyper3 |
| chr4  | 141419007 | 141419504 | RP11-542P2.1   | ENSG00000205301 | 121   | 0.91 | 0.16 | 1.10E-25  | 0.75 | hyper3 |
| chr4  | 8749204   | 8749596   | RP11-1338A24.1 | ENSG00000250915 | -1641 | 0.92 | 0.25 | 3.80E-24  | 0.67 | hyper3 |
| chr4  | 170533398 | 170533948 | NEK1           | ENSG00000137601 | 59    | 0.74 | 0.12 | 3.60E-10  | 0.63 | hyper3 |
| chr5  | 72676120  | 72678421  | RP11-79P5.8    | ENSG00000249149 | -941  | 0.91 | 0.23 | 1.40E-167 | 0.69 | hyper3 |
| chr5  | 92923487  | 92924497  | NR2F1          | ENSG00000175745 | 826   | 0.92 | 0.17 | 3.60E-93  | 0.75 | hyper3 |
| chr5  | 172660720 | 172661133 | NKX2-5         | ENSG00000183072 | 1283  | 0.88 | 0.26 | 1.30E-28  | 0.62 | hyper3 |
| chr5  | 92929268  | 92929489  | NR2F1          | ENSG00000175745 | 1699  | 0.98 | 0.3  | 1.00E-26  | 0.68 | hyper3 |
| chr5  | 140255158 | 140255450 | PCDHA12        | ENSG00000251664 | 246   | 0.92 | 0.31 | 1.60E-18  | 0.61 | hyper3 |
| chr5  | 172663616 | 172664584 | NKX2-5         | ENSG00000183072 | -1740 | 0.94 | 0.2  | 2.00E-16  | 0.74 | hyper3 |
| chr6  | 149771836 | 149772855 | ZC3H12D        | ENSG00000178199 | -1829 | 0.95 | 0.19 | 1.60E-150 | 0.76 | hyper3 |
| chr6  | 50791110  | 50791573  | TFAP2B         | ENSG00000008196 | 1843  | 0.91 | 0.27 | 6.70E-40  | 0.65 | hyper3 |
| chr6  | 10881846  | 10882051  | RP11-637O19.2  | ENSG00000235051 | -65   | 0.89 | 0.26 | 1.70E-34  | 0.63 | hyper3 |
| chr6  | 168197142 | 168198164 | C6orf123       | ENSG00000146521 | -127  | 0.98 | 0.25 | 3.60E-23  | 0.73 | hyper3 |

|       |           |           |               |                 |       |      |      |          |       |        |
|-------|-----------|-----------|---------------|-----------------|-------|------|------|----------|-------|--------|
| chr6  | 25882327  | 25882560  | SLC17A3       | ENSG00000124564 | 71    | 0.92 | 0.13 | 1.90E-21 | 0.79  | hyper3 |
| chr6  | 24357719  | 24358309  | DCDC2         | ENSG00000146038 | -133  | 0.98 | 0.28 | 8.40E-13 | 0.7   | hyper3 |
| chr6  | 5851610   | 5851841   | RP3-380B8.4   | ENSG00000233064 | -14   | 0.84 | 0.17 | 6.40E-11 | 0.67  | hyper3 |
| chr7  | 121950249 | 121950927 | FEZF1         | ENSG00000128610 | 157   | 0.95 | 0.16 | 9.40E-92 | 0.79  | hyper3 |
| chr7  | 130126017 | 130126801 | MEST          | ENSG00000106484 | 363   | 0.97 | 0.22 | 7.30E-70 | 0.75  | hyper3 |
| chr7  | 750788    | 751237    | PRKAR1B       | ENSG00000188191 | 1197  | 0.98 | 0.34 | 4.20E-22 | 0.65  | hyper3 |
| chr7  | 19151966  | 19152347  | AC003986.6    | ENSG00000232821 | 59    | 0.97 | 0.22 | 2.00E-16 | 0.75  | hyper3 |
| chr7  | 2802440   | 2802698   | GNA12         | ENSG00000146535 | 205   | 1    | 0.23 | 3.20E-12 | 0.77  | hyper3 |
| chr8  | 143545445 | 143546178 | BAI1          | ENSG00000181790 | 434   | 0.93 | 0.27 | 1.10E-66 | 0.66  | hyper3 |
| chr8  | 145749855 | 145750410 | LRRC14        | ENSG00000160959 | 1085  | 0.85 | 0.18 | 1.90E-48 | 0.67  | hyper3 |
| chr8  | 72753874  | 72754755  | MSC           | ENSG00000178860 | 913   | 0.97 | 0.3  | 1.10E-31 | 0.67  | hyper3 |
| chr8  | 87081653  | 87082046  | PSKH2         | ENSG00000147613 | 77    | 0.95 | 0.18 | 6.10E-24 | 0.77  | hyper3 |
| chr8  | 27183090  | 27183390  | PTK2B         | ENSG00000120899 | 159   | 0.85 | 0.2  | 2.10E-22 | 0.65  | hyper3 |
| chr8  | 21882245  | 21882883  | NPM2          | ENSG00000158806 | 293   | 0.85 | 0.22 | 3.60E-18 | 0.64  | hyper3 |
| chr8  | 107227785 | 107228007 | RP11-778D12.1 | ENSG00000213708 | -95   | 1    | 0.28 | 6.20E-14 | 0.72  | hyper3 |
| chr9  | 139715663 | 139716441 | C9orf86       | ENSG00000196642 | 271   | 0.93 | 0.2  | 8.60E-78 | 0.72  | hyper3 |
| chr9  | 137299190 | 137299437 | RXRA          | ENSG00000186350 | 885   | 0.91 | 0.23 | 7.90E-20 | 0.68  | hyper3 |
| chr1  | 17018683  | 17020959  | RP1-163M9.6   | ENSG00000239644 | -1017 | 0.24 | 0.36 | 4.10E-24 | -0.13 | hypo1  |
| chr12 | 5153012   | 5154346   | KCNA5         | ENSG00000130037 | 594   | 0.13 | 0.33 | 4.00E-12 | -0.21 | hypo1  |
| chr14 | 24808635  | 24808992  | RIPK3         | ENSG00000129465 | 391   | 0.28 | 0.56 | 6.50E-14 | -0.28 | hypo1  |
| chr18 | 580179    | 580899    | CETN1         | ENSG00000177143 | 172   | 0.68 | 0.96 | 2.30E-12 | -0.29 | hypo1  |
| chr19 | 457800    | 462256    | SHC2          | ENSG00000129946 | 968   | 0.48 | 0.64 | 9.00E-14 | -0.16 | hypo1  |
| chr19 | 42827743  | 42829149  | MEGF8         | ENSG00000105429 | -1315 | 0.25 | 0.44 | 6.10E-11 | -0.18 | hypo1  |
| chr4  | 995482    | 997541    | IDUA          | ENSG00000127415 | -18   | 0.45 | 0.76 | 3.20E-44 | -0.3  | hypo1  |
| chr5  | 132160904 | 132161809 | SHROOM1       | ENSG00000164403 | 476   | 0.43 | 0.6  | 8.00E-10 | -0.16 | hypo1  |
| chr1  | 6511689   | 6512110   | ESPN          | ENSG00000187017 | 181   | 0.4  | 0.87 | 1.30E-11 | -0.47 | hypo2  |
| chr11 | 1036420   | 1036827   | MUC6          | ENSG00000184956 | 83    | 0.25 | 0.69 | 1.30E-19 | -0.44 | hypo2  |
| chr11 | 20618197  | 20619920  | SLC6A5        | ENSG00000165970 | -1888 | 0.19 | 0.56 | 1.20E-13 | -0.36 | hypo2  |
| chr11 | 69461060  | 69461378  | CCND1         | ENSG00000110092 | -1506 | 0.45 | 0.89 | 2.10E-13 | -0.43 | hypo2  |
| chr11 | 403072    | 403400    | PKP3          | ENSG00000184363 | -851  | 0.55 | 0.92 | 1.80E-10 | -0.36 | hypo2  |

|       |           |           |              |                 |       |      |      |          |       |       |
|-------|-----------|-----------|--------------|-----------------|-------|------|------|----------|-------|-------|
| chr12 | 2800139   | 2801062   | RP11-885B4.3 | ENSG00000246627 | -316  | 0.51 | 0.85 | 2.50E-28 | -0.34 | hypo2 |
| chr19 | 41115445  | 41115767  | LTBP4        | ENSG00000090006 | -468  | 0.34 | 0.77 | 1.40E-21 | -0.43 | hypo2 |
| chr19 | 19335771  | 19336151  | NCAN         | ENSG00000130287 | -1857 | 0.28 | 0.65 | 2.20E-20 | -0.37 | hypo2 |
| chr19 | 46144872  | 46145631  | EML2         | ENSG00000125746 | 1734  | 0.49 | 0.83 | 1.90E-10 | -0.34 | hypo2 |
| chr2  | 237123015 | 237123572 | ASB18        | ENSG00000182177 | -49   | 0.4  | 0.81 | 9.60E-17 | -0.41 | hypo2 |
| chr20 | 25063838  | 25065525  | VSX1         | ENSG00000100987 | -1685 | 0.22 | 0.59 | 1.60E-21 | -0.37 | hypo2 |
| chr21 | 34638515  | 34639075  | AP000295.7   | ENSG00000223799 | -230  | 0.29 | 0.63 | 2.40E-10 | -0.33 | hypo2 |
| chr7  | 4823506   | 4824097   | KIAA0415     | ENSG00000242802 | 847   | 0.47 | 0.87 | 3.60E-11 | -0.4  | hypo2 |
| chr9  | 140056283 | 140057837 | GRIN1        | ENSG00000176884 | -98   | 0.26 | 0.65 | 4.60E-31 | -0.38 | hypo2 |
| chr9  | 136567684 | 136568146 | SARDH        | ENSG00000123453 | 908   | 0.33 | 0.84 | 7.20E-10 | -0.51 | hypo2 |
| chr1  | 151042870 | 151043537 | GABPB2       | ENSG00000143458 | 149   | 0.19 | 0.89 | 1.90E-12 | -0.71 | hypo3 |
| chr14 | 57278068  | 57278287  | OTX2         | ENSG00000165588 | -990  | 0.13 | 0.9  | 2.30E-30 | -0.77 | hypo3 |
| chr14 | 57278709  | 57279116  | AL162831.1   | ENSG00000248550 | -989  | 0.24 | 0.84 | 3.00E-19 | -0.6  | hypo3 |
| chr14 | 104569499 | 104569780 | ASPG         | ENSG00000166183 | -1627 | 0.29 | 0.89 | 1.10E-11 | -0.6  | hypo3 |
| chr19 | 46195482  | 46196292  | QPCTL        | ENSG00000011478 | 146   | 0.11 | 0.76 | 3.60E-11 | -0.65 | hypo3 |
| chr2  | 220377743 | 220377946 | ACCN4        | ENSG00000072182 | -1048 | 0.2  | 0.94 | 7.20E-19 | -0.74 | hypo3 |
| chr6  | 70506292  | 70507024  | LMBRD1       | ENSG00000168216 | 119   | 0.2  | 0.8  | 4.90E-12 | -0.6  | hypo3 |
| chr7  | 159023681 | 159023985 | PIP5K1P2     | ENSG00000229435 | -292  | 0.18 | 0.78 | 1.70E-20 | -0.6  | hypo3 |
| chr7  | 87229551  | 87229890  | ABCB1        | ENSG00000085563 | -220  | 0.11 | 0.72 | 1.70E-10 | -0.61 | hypo3 |
| chr9  | 139397412 | 139397710 | NOTCH1       | ENSG00000148400 | 1736  | 0.2  | 0.89 | 1.70E-12 | -0.68 | hypo3 |
| chr1  | 9883011   | 9884667   | CLSTN1       | ENSG00000171603 | 184   | 0.34 | 0.14 | 1.80E-09 | 0.19  | NA    |
| chr1  | 11724113  | 11724885  | FBXO6        | ENSG00000116663 | 318   | 0.41 | 0.2  | 1.80E-09 | 0.21  | NA    |
| chr1  | 156783523 | 156784037 | SH2D2A       | ENSG00000027869 | 123   | 0.48 | 0.07 | 2.10E-09 | 0.4   | NA    |
| chr1  | 71512224  | 71513804  | PTGER3       | ENSG00000050628 | 267   | 0.45 | 0.19 | 2.40E-09 | 0.26  | NA    |
| chr1  | 156046343 | 156047384 | AL355388.1   | ENSG00000222611 | -301  | 0.28 | 0.46 | 2.90E-09 | -0.18 | NA    |
| chr1  | 227058045 | 227058906 | PSEN2        | ENSG00000143801 | 211   | 0.4  | 0.18 | 4.10E-09 | 0.22  | NA    |
| chr1  | 217310749 | 217311178 | ESRRG        | ENSG00000196482 | 133   | 0.59 | 0.24 | 4.80E-09 | 0.35  | NA    |
| chr1  | 4771652   | 4772545   | AJAP1        | ENSG00000196581 | 883   | 0.98 | 0.85 | 5.60E-09 | 0.13  | NA    |
| chr1  | 13909606  | 13909842  | PDPN         | ENSG00000162493 | -236  | 0.89 | 0.43 | 7.30E-09 | 0.47  | NA    |
| chr1  | 104068487 | 104068913 | RNPC3        | ENSG00000185946 | 122   | 0.56 | 0.12 | 7.50E-09 | 0.45  | NA    |

|      |           |           |            |                 |       |      |      |          |       |    |
|------|-----------|-----------|------------|-----------------|-------|------|------|----------|-------|----|
| chr1 | 1161959   | 1162281   | SDF4       | ENSG00000078808 | 1856  | 0.98 | 0.45 | 1.30E-08 | 0.53  | NA |
| chr1 | 38510102  | 38513642  | POU3F1     | ENSG00000185668 | 578   | 0.35 | 0.24 | 1.40E-08 | 0.11  | NA |
| chr1 | 231297812 | 231299777 | TRIM67     | ENSG00000119283 | 936   | 0.3  | 0.16 | 1.90E-08 | 0.14  | NA |
| chr1 | 226075150 | 226075680 | LEFTY1     | ENSG00000243709 | 1431  | 0.9  | 0.49 | 2.00E-08 | 0.41  | NA |
| chr1 | 230202494 | 230204209 | GALNT2     | ENSG00000143641 | 395   | 0.36 | 0.18 | 2.20E-08 | 0.19  | NA |
| chr1 | 25071352  | 25072586  | CLIC4      | ENSG00000169504 | 121   | 0.38 | 0.16 | 2.30E-08 | 0.21  | NA |
| chr1 | 151693991 | 151694282 | RIIAD1     | ENSG00000178796 | 123   | 0.41 | 0.1  | 2.90E-08 | 0.31  | NA |
| chr1 | 200992282 | 200992839 | KIF21B     | ENSG00000116852 | -49   | 0.39 | 0.18 | 2.90E-08 | 0.2   | NA |
| chr1 | 17198626  | 17200049  | BX284668.1 | ENSG00000196690 | -669  | 0.38 | 0.57 | 3.00E-08 | -0.18 | NA |
| chr1 | 201708787 | 201709429 | NAV1       | ENSG00000134369 | 112   | 0.53 | 0.2  | 3.00E-08 | 0.33  | NA |
| chr1 | 24513540  | 24514477  | IL28RA     | ENSG00000185436 | -270  | 0.35 | 0.15 | 3.40E-08 | 0.2   | NA |
| chr1 | 6530536   | 6531814   | PLEKHG5    | ENSG00000171680 | 468   | 0.94 | 0.82 | 4.60E-08 | 0.11  | NA |
| chr1 | 93426512  | 93427754  | FAM69A     | ENSG00000154511 | -76   | 0.44 | 0.2  | 8.50E-08 | 0.25  | NA |
| chr1 | 75600674  | 75601415  | LHX8       | ENSG00000162624 | 477   | 0.57 | 0.22 | 1.20E-07 | 0.36  | NA |
| chr1 | 226924560 | 226926553 | ITPKB      | ENSG00000143772 | -397  | 0.28 | 0.15 | 1.20E-07 | 0.13  | NA |
| chr1 | 23763154  | 23763971  | ASAP3      | ENSG00000088280 | -392  | 0.96 | 0.79 | 1.30E-07 | 0.17  | NA |
| chr1 | 19991146  | 19992788  | HTR6       | ENSG00000158748 | 187   | 0.34 | 0.18 | 1.40E-07 | 0.16  | NA |
| chr1 | 26496179  | 26496824  | ZNF593     | ENSG00000142684 | 139   | 0.43 | 0.17 | 1.90E-07 | 0.26  | NA |
| chr1 | 47881896  | 47883065  | FOXE3      | ENSG00000186790 | 736   | 0.45 | 0.26 | 1.90E-07 | 0.2   | NA |
| chr1 | 115880167 | 115881332 | NGF        | ENSG00000134259 | 108   | 0.36 | 0.17 | 2.00E-07 | 0.19  | NA |
| chr1 | 154155268 | 154155926 | TPM3       | ENSG00000143549 | -43   | 0.52 | 0.21 | 2.20E-07 | 0.31  | NA |
| chr1 | 210001129 | 210001428 | DIEXF      | ENSG00000117597 | -74   | 0.2  | 0.56 | 3.10E-07 | -0.36 | NA |
| chr1 | 6131635   | 6131985   | KCNAB2     | ENSG00000069424 | -997  | 0.77 | 0.37 | 4.60E-07 | 0.41  | NA |
| chr1 | 7843915   | 7845104   | PER3       | ENSG00000049246 | 129   | 0.31 | 0.17 | 4.90E-07 | 0.14  | NA |
| chr1 | 113261468 | 113261765 | FAM19A3    | ENSG00000184599 | -1425 | 0.42 | 0.12 | 4.90E-07 | 0.29  | NA |
| chr1 | 17085411  | 17086974  | MST1P9     | ENSG00000186715 | -825  | 0.83 | 0.62 | 5.30E-07 | 0.21  | NA |
| chr1 | 32410188  | 32410630  | PTP4A2     | ENSG00000184007 | 48    | 0.53 | 0.26 | 5.30E-07 | 0.27  | NA |
| chr1 | 50884228  | 50891471  | DMRTA2     | ENSG00000142700 | -545  | 0.33 | 0.24 | 5.70E-07 | 0.097 | NA |
| chr1 | 239550108 | 239551339 | CHRM3      | ENSG00000133019 | 503   | 0.28 | 0.14 | 6.10E-07 | 0.14  | NA |
| chr1 | 150121695 | 150123078 | PLEKHO1    | ENSG00000023902 | 278   | 0.36 | 0.18 | 7.20E-07 | 0.18  | NA |

|      |           |           |              |                 |      |      |      |          |       |    |
|------|-----------|-----------|--------------|-----------------|------|------|------|----------|-------|----|
| chr1 | 87617153  | 87617417  | AL139139.1   | ENSG00000221222 | 304  | 0.96 | 0.69 | 7.30E-07 | 0.27  | NA |
| chr1 | 44495629  | 44497112  | SLC6A9       | ENSG00000196517 | 662  | 0.45 | 0.21 | 7.50E-07 | 0.24  | NA |
| chr1 | 151103685 | 151106100 | SEMA6C       | ENSG00000143434 | 452  | 0.8  | 0.66 | 8.20E-07 | 0.14  | NA |
| chr1 | 210407401 | 210407637 | C1orf133     | ENSG00000203706 | -127 | 0.82 | 0.36 | 8.50E-07 | 0.46  | NA |
| chr1 | 27338879  | 27339441  | FAM46B       | ENSG00000158246 | 167  | 0.5  | 0.23 | 9.20E-07 | 0.27  | NA |
| chr1 | 16860873  | 16862296  | RP4-798A10.5 | ENSG00000241374 | -79  | 0.61 | 0.45 | 9.30E-07 | 0.17  | NA |
| chr1 | 32826944  | 32828017  | RP4-811H24.6 | ENSG00000225828 | -55  | 0.36 | 0.2  | 1.10E-06 | 0.16  | NA |
| chr1 | 162530856 | 162531853 | UAP1         | ENSG00000117143 | 33   | 0.35 | 0.14 | 1.10E-06 | 0.21  | NA |
| chr1 | 8377784   | 8378447   | SLC45A1      | ENSG00000162426 | 229  | 0.35 | 0.16 | 1.40E-06 | 0.19  | NA |
| chr1 | 35442237  | 35442936  | RP11-244H3.1 | ENSG00000241014 | 1721 | 0.72 | 0.41 | 1.50E-06 | 0.31  | NA |
| chr1 | 211432105 | 211434134 | RCOR3        | ENSG00000117625 | 498  | 0.35 | 0.21 | 1.70E-06 | 0.15  | NA |
| chr1 | 230561103 | 230562702 | PGBD5        | ENSG00000177614 | -427 | 0.35 | 0.16 | 1.70E-06 | 0.19  | NA |
| chr1 | 36641756  | 36642461  | MAP7D1       | ENSG00000116871 | -210 | 0.95 | 0.81 | 1.80E-06 | 0.14  | NA |
| chr1 | 29507976  | 29508686  | SRSF4        | ENSG00000116350 | 63   | 0.3  | 0.16 | 2.10E-06 | 0.14  | NA |
| chr1 | 41326949  | 41328285  | CITED4       | ENSG00000179862 | 401  | 0.33 | 0.17 | 2.40E-06 | 0.16  | NA |
| chr1 | 79472281  | 79472537  | ELTD1        | ENSG00000162618 | -6   | 0.88 | 0.3  | 2.40E-06 | 0.58  | NA |
| chr1 | 113050813 | 113052301 | WNT2B        | ENSG00000134245 | 157  | 0.37 | 0.22 | 2.60E-06 | 0.15  | NA |
| chr1 | 3775077   | 3775369   | DFFB         | ENSG00000169598 | 1055 | 0.85 | 0.19 | 2.90E-06 | 0.66  | NA |
| chr1 | 41706957  | 41708327  | SCMH1        | ENSG0000010803  | 140  | 0.32 | 0.15 | 3.10E-06 | 0.17  | NA |
| chr1 | 168194945 | 168195839 | SFT2D2       | ENSG00000213064 | 216  | 0.3  | 0.16 | 3.20E-06 | 0.14  | NA |
| chr1 | 23885682  | 23886212  | ID3          | ENSG00000117318 | -13  | 0.28 | 0.11 | 3.60E-06 | 0.17  | NA |
| chr1 | 31654422  | 31654833  | NKAIN1       | ENSG00000084628 | -104 | 0.96 | 0.53 | 3.70E-06 | 0.43  | NA |
| chr1 | 47899661  | 47900385  | RP11-511I2.5 | ENSG00000237424 | 290  | 0.19 | 0.47 | 3.90E-06 | -0.28 | NA |
| chr1 | 2343385   | 2344717   | PEX10        | ENSG00000157911 | -98  | 0.26 | 0.11 | 4.00E-06 | 0.14  | NA |
| chr1 | 162039450 | 162040052 | NOS1AP       | ENSG00000198929 | 187  | 0.42 | 0.15 | 4.00E-06 | 0.26  | NA |
| chr1 | 184942862 | 184943777 | FAM129A      | ENSG00000135842 | 363  | 0.28 | 0.12 | 4.20E-06 | 0.16  | NA |
| chr1 | 201437519 | 201438648 | PHLDA3       | ENSG00000174307 | -374 | 0.35 | 0.2  | 4.20E-06 | 0.15  | NA |
| chr1 | 32705524  | 32707141  | MTMR9LP      | ENSG00000220785 | -309 | 0.28 | 0.13 | 4.40E-06 | 0.15  | NA |
| chr1 | 225614721 | 225616512 | LBR          | ENSG00000143815 | -17  | 0.33 | 0.18 | 4.40E-06 | 0.15  | NA |
| chr1 | 41284847  | 41285149  | KCNQ4        | ENSG00000117013 | 362  | 0.96 | 0.49 | 5.30E-06 | 0.47  | NA |

|      |           |           |               |                 |      |      |      |          |       |    |
|------|-----------|-----------|---------------|-----------------|------|------|------|----------|-------|----|
| chr1 | 2517397   | 2518892   | C1orf93       | ENSG00000157870 | 214  | 0.3  | 0.17 | 5.60E-06 | 0.13  | NA |
| chr1 | 933387    | 937410    | HES4          | ENSG00000188290 | -37  | 0.26 | 0.19 | 5.80E-06 | 0.075 | NA |
| chr1 | 110198541 | 110199127 | GSTM4         | ENSG00000168765 | 131  | 0.37 | 0.17 | 6.10E-06 | 0.2   | NA |
| chr1 | 29585897  | 29586598  | PTPRU         | ENSG00000060656 | -446 | 0.51 | 0.24 | 6.30E-06 | 0.27  | NA |
| chr1 | 165737832 | 165738349 | TMCO1         | ENSG00000143183 | -16  | 0.21 | 0.83 | 6.70E-06 | -0.62 | NA |
| chr1 | 146643470 | 146644501 | PRKAB2        | ENSG00000131791 | 61   | 0.31 | 0.13 | 6.80E-06 | 0.18  | NA |
| chr1 | 156390403 | 156391581 | C1orf61       | ENSG00000125462 | 552  | 0.4  | 0.23 | 8.00E-06 | 0.17  | NA |
| chr1 | 6507207   | 6509186   | ESPN          | ENSG00000187017 | 93   | 0.25 | 0.43 | 8.50E-06 | -0.18 | NA |
| chr1 | 182808312 | 182809122 | DHX9          | ENSG00000135829 | 278  | 0.31 | 0.14 | 9.60E-06 | 0.17  | NA |
| chr1 | 1309140   | 1311039   | AURKAIP1      | ENSG00000175756 | 435  | 0.47 | 0.32 | 1.10E-05 | 0.15  | NA |
| chr1 | 17197561  | 17197849  | RP11-108M9.3  | ENSG00000228549 | 265  | 0.97 | 0.85 | 1.10E-05 | 0.12  | NA |
| chr1 | 46767425  | 46769036  | LRRC41        | ENSG00000132128 | 716  | 0.28 | 0.17 | 1.10E-05 | 0.11  | NA |
| chr1 | 220101132 | 220102147 | SLC30A10      | ENSG00000196660 | 305  | 0.3  | 0.14 | 1.10E-05 | 0.16  | NA |
| chr1 | 33429531  | 33430513  | RNF19B        | ENSG00000116514 | 264  | 0.25 | 0.12 | 1.20E-05 | 0.12  | NA |
| chr1 | 35246876  | 35247599  | GJB3          | ENSG00000188910 | 447  | 0.37 | 0.17 | 1.20E-05 | 0.19  | NA |
| chr1 | 45278765  | 45279644  | BTBD19        | ENSG00000222009 | 358  | 0.44 | 0.21 | 1.20E-05 | 0.23  | NA |
| chr1 | 144593334 | 144594233 | NBPF8         | ENSG00000225241 | 420  | 0.08 | 0.41 | 1.20E-05 | -0.33 | NA |
| chr1 | 147789652 | 147790094 | RP11-495P10.4 | ENSG00000235988 | 256  | 0.58 | 0.34 | 1.20E-05 | 0.23  | NA |
| chr1 | 1476093   | 1476669   | C1orf70       | ENSG00000205090 | -548 | 0.6  | 0.35 | 1.30E-05 | 0.25  | NA |
| chr1 | 18956895  | 18959829  | PAX7          | ENSG00000009709 | 862  | 0.36 | 0.23 | 1.30E-05 | 0.13  | NA |
| chr1 | 44399068  | 44399535  | ARTN          | ENSG00000117407 | -46  | 0.56 | 0.33 | 1.30E-05 | 0.22  | NA |
| chr1 | 51433762  | 51435505  | CDKN2C        | ENSG00000123080 | 266  | 0.31 | 0.17 | 1.30E-05 | 0.14  | NA |
| chr1 | 36042432  | 36043444  | RP4-728D4.2   | ENSG00000239636 | 392  | 0.94 | 0.71 | 1.40E-05 | 0.23  | NA |
| chr1 | 37939723  | 37940650  | RP11-422J8.1  | ENSG00000233621 | -174 | 0.29 | 0.14 | 1.70E-05 | 0.15  | NA |
| chr1 | 2460760   | 2462010   | HES5          | ENSG00000197921 | 299  | 0.28 | 0.15 | 1.80E-05 | 0.13  | NA |
| chr1 | 12655926  | 12656248  | DHRS3         | ENSG00000162496 | 234  | 0.51 | 0.24 | 1.90E-05 | 0.27  | NA |
| chr1 | 53386617  | 53387523  | ECHDC2        | ENSG00000121310 | 117  | 0.38 | 0.2  | 1.90E-05 | 0.18  | NA |
| chr1 | 91300979  | 91301891  | RP4-665J23.1  | ENSG00000233593 | 283  | 0.9  | 0.79 | 1.90E-05 | 0.11  | NA |
| chr1 | 234744276 | 234747024 | IRF2BP2       | ENSG00000168264 | -379 | 0.23 | 0.15 | 1.90E-05 | 0.081 | NA |
| chr1 | 234492484 | 234492860 | RP5-827C21.2  | ENSG00000236358 | -80  | 0.95 | 0.63 | 2.00E-05 | 0.33  | NA |

|      |           |           |              |                 |      |      |      |          |       |    |
|------|-----------|-----------|--------------|-----------------|------|------|------|----------|-------|----|
| chr1 | 53527572  | 53528974  | PODN         | ENSG00000174348 | 419  | 0.47 | 0.28 | 2.10E-05 | 0.19  | NA |
| chr1 | 74663826  | 74664035  | LRRRIQ3      | ENSG00000162620 | -102 | 0.36 | 0.15 | 2.10E-05 | 0.22  | NA |
| chr1 | 155051155 | 155055291 | EFNA3        | ENSG00000143590 | 1875 | 0.34 | 0.24 | 2.20E-05 | 0.098 | NA |
| chr1 | 55266277  | 55267058  | TTC22        | ENSG00000006555 | 204  | 0.47 | 0.26 | 2.30E-05 | 0.21  | NA |
| chr1 | 180922915 | 180923692 | RP11-46A10.4 | ENSG00000232586 | 720  | 0.35 | 0.18 | 2.40E-05 | 0.17  | NA |
| chr1 | 179851482 | 179852371 | TOR1AIP1     | ENSG00000143337 | -3   | 0.3  | 0.12 | 2.60E-05 | 0.18  | NA |
| chr1 | 236444603 | 236445700 | ERO1LB       | ENSG00000086619 | -250 | 0.27 | 0.12 | 2.70E-05 | 0.15  | NA |
| chr1 | 13910137  | 13910868  | PDPN         | ENSG00000162493 | 245  | 0.33 | 0.16 | 2.80E-05 | 0.17  | NA |
| chr1 | 113932580 | 113934070 | MAGI3        | ENSG00000081026 | -46  | 0.3  | 0.2  | 3.00E-05 | 0.11  | NA |
| chr1 | 36106969  | 36107261  | PSMB2        | ENSG00000126067 | 330  | 0.43 | 0.14 | 3.20E-05 | 0.29  | NA |
| chr1 | 249141563 | 249142796 | ZNF672       | ENSG00000171161 | 705  | 0.97 | 0.89 | 3.20E-05 | 0.081 | NA |
| chr1 | 119531991 | 119532196 | TBX15        | ENSG00000092607 | 86   | 0.98 | 0.66 | 3.30E-05 | 0.32  | NA |
| chr1 | 67895135  | 67896826  | SERBP1       | ENSG00000142864 | -640 | 0.37 | 0.2  | 3.50E-05 | 0.16  | NA |
| chr1 | 78511577  | 78512161  | GIPC2        | ENSG00000137960 | 283  | 0.34 | 0.16 | 3.60E-05 | 0.18  | NA |
| chr1 | 25869893  | 25871042  | LDLRAP1      | ENSG00000157978 | 396  | 0.4  | 0.19 | 4.20E-05 | 0.21  | NA |
| chr1 | 35394747  | 35396206  | DLGAP3       | ENSG00000116544 | -290 | 0.27 | 0.14 | 4.50E-05 | 0.12  | NA |
| chr1 | 2706025   | 2706961   | TTC34        | ENSG00000215912 | -257 | 0.31 | 0.18 | 4.60E-05 | 0.13  | NA |
| chr1 | 155098434 | 155100451 | EFNA1        | ENSG00000169242 | -494 | 0.3  | 0.17 | 4.90E-05 | 0.13  | NA |
| chr1 | 36273499  | 36274461  | EIF2C4       | ENSG00000134698 | 207  | 0.38 | 0.19 | 5.10E-05 | 0.19  | NA |
| chr1 | 203274305 | 203275338 | RP11-134P9.1 | ENSG00000233791 | -434 | 0.33 | 0.18 | 5.10E-05 | 0.15  | NA |
| chr1 | 19970255  | 19971923  | NBL1         | ENSG00000158747 | 432  | 0.28 | 0.17 | 5.30E-05 | 0.12  | NA |
| chr1 | 155920651 | 155920898 | ARHGEF2      | ENSG00000116584 | 550  | 0.98 | 0.73 | 5.30E-05 | 0.25  | NA |
| chr1 | 6479057   | 6480938   | HES2         | ENSG00000069812 | -34  | 0.24 | 0.37 | 5.40E-05 | -0.13 | NA |
| chr1 | 1115574   | 1116006   | TTLL10       | ENSG00000162571 | -74  | 0.51 | 0.79 | 5.50E-05 | -0.28 | NA |
| chr1 | 10699394  | 10700098  | CASZ1        | ENSG00000130940 | -926 | 0.97 | 0.81 | 6.40E-05 | 0.16  | NA |
| chr1 | 19600249  | 19600942  | AKR7L        | ENSG00000211454 | -160 | 0.87 | 0.72 | 6.50E-05 | 0.15  | NA |
| chr1 | 112524468 | 112525385 | KCND3        | ENSG00000171385 | 492  | 0.98 | 0.9  | 6.60E-05 | 0.078 | NA |
| chr1 | 243417741 | 243418775 | CEP170       | ENSG00000143702 | -486 | 0.34 | 0.14 | 6.80E-05 | 0.19  | NA |
| chr1 | 45189705  | 45190558  | C1orf228     | ENSG00000198520 | 86   | 0.87 | 0.49 | 6.90E-05 | 0.38  | NA |
| chr1 | 3712398   | 3712324   | LRRC47       | ENSG00000130764 | 252  | 0.26 | 0.14 | 7.00E-05 | 0.12  | NA |

|      |           |           |               |                 |      |      |      |          |       |    |
|------|-----------|-----------|---------------|-----------------|------|------|------|----------|-------|----|
| chr1 | 78224843  | 78225650  | USP33         | ENSG00000077254 | -173 | 0.39 | 0.2  | 7.00E-05 | 0.19  | NA |
| chr1 | 27961559  | 27961810  | FGR           | ENSG00000000938 | -39  | 0.97 | 0.53 | 7.20E-05 | 0.44  | NA |
| chr1 | 226595333 | 226595939 | PARP1         | ENSG00000143799 | -6   | 0.28 | 0.14 | 7.30E-05 | 0.14  | NA |
| chr1 | 109203593 | 109204378 | HENMT1        | ENSG00000162639 | -308 | 0.39 | 0.17 | 7.40E-05 | 0.22  | NA |
| chr1 | 27709600  | 27709831  | CD164L2       | ENSG00000174950 | 78   | 0.57 | 0.3  | 7.50E-05 | 0.27  | NA |
| chr1 | 6761295   | 6762131   | DNAJC11       | ENSG00000007923 | 149  | 0.35 | 0.15 | 7.70E-05 | 0.2   | NA |
| chr1 | 9188503   | 9189743   | GPR157        | ENSG00000180758 | -283 | 0.39 | 0.2  | 7.90E-05 | 0.2   | NA |
| chr1 | 117909174 | 117910445 | MAN1A2        | ENSG00000198162 | -262 | 0.28 | 0.16 | 8.30E-05 | 0.12  | NA |
| chr1 | 173445978 | 173447105 | AL645568.1    | ENSG00000247291 | -247 | 0.38 | 0.2  | 8.30E-05 | 0.18  | NA |
| chr1 | 36621451  | 36622310  | MAP7D1        | ENSG00000116871 | 314  | 0.67 | 0.2  | 9.10E-05 | 0.47  | NA |
| chr1 | 6452814   | 6454185   | ACOT7         | ENSG00000097021 | -78  | 0.3  | 0.17 | 9.80E-05 | 0.13  | NA |
| chr1 | 161494024 | 161495356 | HSPA6         | ENSG00000173110 | 654  | 0.33 | 0.17 | 9.90E-05 | 0.16  | NA |
| chr1 | 52455970  | 52456453  | RAB3B         | ENSG00000169213 | 204  | 0.27 | 0.13 | 1.00E-04 | 0.13  | NA |
| chr1 | 119543821 | 119544339 | RP4-712E4.1   | ENSG00000226172 | -65  | 0.29 | 0.11 | 0.00011  | 0.18  | NA |
| chr1 | 245133028 | 245134711 | EFCAB2        | ENSG00000203666 | 828  | 0.29 | 0.17 | 0.00011  | 0.12  | NA |
| chr1 | 146649622 | 146649852 | RP11-337C18.5 | ENSG00000180867 | 45   | 0.66 | 0.46 | 0.00012  | 0.21  | NA |
| chr1 | 24648202  | 24648985  | RP11-10N16.3  | ENSG00000232298 | -202 | 0.51 | 0.67 | 0.00013  | -0.16 | NA |
| chr1 | 35657467  | 35658811  | SFPQ          | ENSG00000116560 | 610  | 0.29 | 0.16 | 0.00013  | 0.12  | NA |
| chr1 | 234040298 | 234041457 | SLC35F3       | ENSG00000183780 | 198  | 0.27 | 0.15 | 0.00013  | 0.12  | NA |
| chr1 | 19638207  | 19639309  | AKR7A2        | ENSG00000053371 | -357 | 0.25 | 0.12 | 0.00015  | 0.12  | NA |
| chr1 | 1228780   | 1230163   | ACAP3         | ENSG00000131584 | 917  | 0.96 | 0.88 | 0.00016  | 0.078 | NA |
| chr1 | 154244710 | 154245289 | HAX1          | ENSG00000143575 | 12   | 0.36 | 0.16 | 0.00016  | 0.19  | NA |
| chr1 | 1655395   | 1656231   | CDK11A        | ENSG00000008128 | -355 | 0.22 | 0.49 | 0.00017  | -0.27 | NA |
| chr1 | 43423467  | 43424768  | SLC2A1        | ENSG00000117394 | 383  | 0.27 | 0.16 | 0.00017  | 0.1   | NA |
| chr1 | 6187743   | 6188235   | CHD5          | ENSG00000116254 | 613  | 0.71 | 0.5  | 0.00019  | 0.22  | NA |
| chr1 | 94883525  | 94884402  | ABCD3         | ENSG00000117528 | 30   | 0.28 | 0.13 | 0.00019  | 0.15  | NA |
| chr1 | 154908962 | 154909931 | PMVK          | ENSG00000163344 | 21   | 0.12 | 0.6  | 0.00019  | -0.48 | NA |
| chr1 | 231663999 | 231664608 | RP11-295G20.2 | ENSG00000233461 | -302 | 0.13 | 0.41 | 0.00019  | -0.29 | NA |
| chr1 | 2046429   | 2046865   | PRKCZ         | ENSG00000067606 | -997 | 0.77 | 0.42 | 2.00E-04 | 0.34  | NA |
| chr1 | 6545143   | 6545559   | PLEKHG5       | ENSG00000171680 | 178  | 0.44 | 0.22 | 2.00E-04 | 0.22  | NA |



|      |           |           |               |                 |      |      |      |          |       |    |
|------|-----------|-----------|---------------|-----------------|------|------|------|----------|-------|----|
| chr1 | 26551517  | 26552194  | RP11-231P20.2 | ENSG00000236155 | 44   | 0.33 | 0.16 | 2.00E-04 | 0.17  | NA |
| chr1 | 206808523 | 206809187 | DYRK3         | ENSG00000143479 | -26  | 0.27 | 0.13 | 2.00E-04 | 0.14  | NA |
| chr1 | 236687071 | 236687608 | LGALS8        | ENSG00000116977 | 166  | 0.31 | 0.14 | 2.00E-04 | 0.17  | NA |
| chr1 | 52344178  | 52344939  | NRD1          | ENSG00000078618 | -176 | 0.39 | 0.21 | 0.00021  | 0.18  | NA |
| chr1 | 143467293 | 143467675 | BX004987.4    | ENSG00000185044 | -180 | 0.59 | 0.77 | 0.00021  | -0.17 | NA |
| chr1 | 28585831  | 28587249  | SESN2         | ENSG00000130766 | 502  | 0.25 | 0.15 | 0.00022  | 0.1   | NA |
| chr1 | 6672786   | 6675741   | PHF13         | ENSG00000116273 | 518  | 0.26 | 0.19 | 0.00024  | 0.07  | NA |
| chr1 | 13839505  | 13840613  | RP4-597A16.2  | ENSG00000229350 | 344  | 0.28 | 0.17 | 0.00025  | 0.11  | NA |
| chr1 | 220701507 | 220702348 | MARK1         | ENSG00000116141 | 359  | 0.25 | 0.14 | 0.00025  | 0.12  | NA |
| chr1 | 1361560   | 1361787   | TMEM88B       | ENSG00000205116 | 117  | 0.38 | 0.68 | 0.00026  | -0.31 | NA |
| chr1 | 247241579 | 247242201 | ZNF670        | ENSG00000135747 | 148  | 0.37 | 0.11 | 0.00026  | 0.26  | NA |
| chr1 | 109289018 | 109289822 | STXBP3        | ENSG00000116266 | 124  | 0.37 | 0.18 | 0.00027  | 0.19  | NA |
| chr1 | 244012712 | 244013245 | AKT3          | ENSG00000117020 | 452  | 0.35 | 0.18 | 0.00027  | 0.17  | NA |
| chr1 | 14075267  | 14076458  | PRDM2         | ENSG00000116731 | -33  | 0.23 | 0.14 | 0.00028  | 0.086 | NA |
| chr1 | 221051966 | 221053673 | RP11-295M18.5 | ENSG00000257551 | 663  | 0.33 | 0.24 | 3.00E-04 | 0.094 | NA |
| chr1 | 197880016 | 197881637 | LHX9          | ENSG00000143355 | -792 | 0.32 | 0.18 | 0.00031  | 0.14  | NA |
| chr1 | 236227682 | 236228817 | NID1          | ENSG00000116962 | 160  | 0.35 | 0.23 | 0.00031  | 0.12  | NA |
| chr1 | 15736033  | 15737228  | EFHD2         | ENSG00000142634 | 239  | 0.28 | 0.15 | 0.00033  | 0.14  | NA |
| chr1 | 38470617  | 38471396  | FHL3          | ENSG00000183386 | 168  | 0.38 | 0.18 | 0.00033  | 0.19  | NA |
| chr1 | 21978101  | 21978764  | RAP1GAP       | ENSG00000076864 | -103 | 0.22 | 0.46 | 0.00036  | -0.24 | NA |
| chr1 | 1283933   | 1285345   | DVL1          | ENSG00000107404 | -304 | 0.28 | 0.16 | 0.00037  | 0.11  | NA |
| chr1 | 2126048   | 2126642   | C1orf86       | ENSG00000162585 | -167 | 0.4  | 0.15 | 0.00038  | 0.25  | NA |
| chr1 | 58715272  | 58716095  | DAB1          | ENSG00000173406 | 492  | 0.34 | 0.18 | 0.00042  | 0.16  | NA |
| chr1 | 93297498  | 93298122  | RPL5          | ENSG00000122406 | 213  | 0.35 | 0.16 | 0.00043  | 0.19  | NA |
| chr1 | 6614136   | 6614835   | NOL9          | ENSG00000162408 | 75   | 0.36 | 0.17 | 0.00044  | 0.18  | NA |
| chr1 | 16161260  | 16162880  | RP11-169K16.9 | ENSG00000179743 | 285  | 0.27 | 0.16 | 0.00044  | 0.11  | NA |
| chr1 | 211306667 | 211307675 | RP11-75I2.3   | ENSG00000234233 | -455 | 0.34 | 0.13 | 0.00044  | 0.21  | NA |
| chr1 | 100731632 | 100731999 | RP11-305E17.6 | ENSG00000224616 | -139 | 0.35 | 0.14 | 0.00046  | 0.21  | NA |
| chr1 | 160001295 | 160001989 | PIGM          | ENSG00000143315 | 141  | 0.17 | 0.41 | 0.00046  | -0.24 | NA |
| chr1 | 29138501  | 29139348  | OPRD1         | ENSG00000116329 | 270  | 0.43 | 0.23 | 0.00047  | 0.21  | NA |

|      |           |           |               |                 |       |      |      |          |       |    |
|------|-----------|-----------|---------------|-----------------|-------|------|------|----------|-------|----|
| chr1 | 154530681 | 154530903 | UBE2Q1        | ENSG00000160714 | 317   | 0.42 | 0.14 | 0.00047  | 0.28  | NA |
| chr1 | 47899125  | 47899398  | RP11-511I2.5  | ENSG00000237424 | 1052  | 0.31 | 0.76 | 0.00049  | -0.45 | NA |
| chr1 | 112938495 | 112939113 | CTTNBP2NL     | ENSG00000143079 | 1     | 0.3  | 0.15 | 0.00049  | 0.15  | NA |
| chr1 | 231296559 | 231297345 | TRIM67        | ENSG00000119283 | -906  | 0.52 | 0.3  | 0.00049  | 0.22  | NA |
| chr1 | 19228828  | 19229634  | ALDH4A1       | ENSG00000159423 | -209  | 0.3  | 0.16 | 0.00053  | 0.14  | NA |
| chr1 | 51701767  | 51702542  | RNF11         | ENSG00000123091 | 211   | 0.31 | 0.18 | 0.00054  | 0.14  | NA |
| chr1 | 16970855  | 16971492  | CROCCP2       | ENSG00000215908 | -6    | 0.15 | 0.1  | 0.00055  | 0.048 | NA |
| chr1 | 46088194  | 46089142  | CCDC17        | ENSG00000159588 | -223  | 0.82 | 0.69 | 0.00056  | 0.13  | NA |
| chr1 | 17051491  | 17051891  | AL021920.2    | ENSG00000243784 | -370  | 0.94 | 0.88 | 0.00061  | 0.059 | NA |
| chr1 | 90460399  | 90461237  | ZNF326        | ENSG00000162664 | 147   | 0.24 | 0.14 | 0.00062  | 0.1   | NA |
| chr1 | 161068062 | 161068801 | KLHDC9        | ENSG00000162755 | 280   | 0.16 | 0.31 | 0.00063  | -0.15 | NA |
| chr1 | 24194254  | 24194990  | FUCA1         | ENSG00000179163 | 158   | 0.28 | 0.16 | 0.00064  | 0.11  | NA |
| chr1 | 209957721 | 209958167 | C1orf74       | ENSG00000162757 | -40   | 0.34 | 0.12 | 0.00068  | 0.22  | NA |
| chr1 | 3370905   | 3371683   | ARHGEF16      | ENSG00000130762 | 304   | 0.38 | 0.2  | 0.00071  | 0.18  | NA |
| chr1 | 2559892   | 2561055   | MMEL1         | ENSG00000142606 | 460   | 0.48 | 0.29 | 0.00074  | 0.19  | NA |
| chr1 | 32169537  | 32169869  | COL16A1       | ENSG00000084636 | -42   | 0.34 | 0.61 | 0.00075  | -0.27 | NA |
| chr1 | 1509482   | 1510747   | SSU72         | ENSG00000160075 | -150  | 0.32 | 0.19 | 0.00077  | 0.14  | NA |
| chr1 | 227747213 | 227747575 | 5S_rRNA       | ENSG00000202264 | -1488 | 0.79 | 0.31 | 8.00E-04 | 0.48  | NA |
| chr1 | 211751121 | 211753177 | SLC30A1       | ENSG00000170385 | -65   | 0.29 | 0.19 | 0.00088  | 0.1   | NA |
| chr1 | 19281948  | 19283883  | IFFO2         | ENSG00000169991 | -723  | 0.28 | 0.2  | 9.00E-04 | 0.084 | NA |
| chr1 | 36786500  | 36789402  | FAM176B       | ENSG00000142694 | 1265  | 0.31 | 0.23 | 0.00093  | 0.076 | NA |
| chr1 | 32052471  | 32052771  | TINAGL1       | ENSG00000142910 | 1869  | 0.56 | 0.34 | 0.00097  | 0.22  | NA |
| chr1 | 174128296 | 174129289 | RP11-160H22.5 | ENSG00000227373 | -367  | 0.26 | 0.14 | 0.001    | 0.12  | NA |
| chr1 | 21754797  | 21755995  | HS6ST1P1      | ENSG00000187952 | 592   | 0.82 | 0.6  | 0.0011   | 0.23  | NA |
| chr1 | 65775018  | 65775746  | DNAJC6        | ENSG00000116675 | 154   | 0.27 | 0.14 | 0.0012   | 0.13  | NA |
| chr1 | 167905027 | 167906801 | BRP44         | ENSG00000143158 | -636  | 0.27 | 0.16 | 0.0012   | 0.12  | NA |
| chr1 | 211500151 | 211500636 | TRAF5         | ENSG00000082512 | 224   | 0.4  | 0.21 | 0.0012   | 0.19  | NA |
| chr1 | 3540767   | 3542241   | RP11-46F15.2  | ENSG00000238260 | -197  | 0.23 | 0.14 | 0.0013   | 0.082 | NA |
| chr1 | 151966632 | 151966893 | S100A10       | ENSG00000197747 | 104   | 0.33 | 0.15 | 0.0013   | 0.18  | NA |
| chr1 | 179544720 | 179545307 | NPHS2         | ENSG00000116218 | 55    | 0.29 | 0.16 | 0.0013   | 0.13  | NA |

|      |           |           |               |                 |       |      |      |        |       |    |
|------|-----------|-----------|---------------|-----------------|-------|------|------|--------|-------|----|
| chr1 | 1623610   | 1625067   | SLC35E2B      | ENSG00000189339 | -255  | 0.33 | 0.11 | 0.0014 | 0.22  | NA |
| chr1 | 26201722  | 26202516  | Y_RNA         | ENSG00000207302 | -1868 | 0.32 | 0.19 | 0.0014 | 0.13  | NA |
| chr1 | 36915796  | 36916324  | OSCP1         | ENSG00000116885 | -180  | 0.4  | 0.19 | 0.0014 | 0.22  | NA |
| chr1 | 40253683  | 40255172  | BMP8B         | ENSG00000116985 | 94    | 0.27 | 0.18 | 0.0014 | 0.096 | NA |
| chr1 | 156084486 | 156085097 | LMNA          | ENSG00000160789 | 293   | 0.24 | 0.14 | 0.0014 | 0.1   | NA |
| chr1 | 11119030  | 11120634  | SRM           | ENSG00000116649 | -89   | 0.28 | 0.16 | 0.0015 | 0.11  | NA |
| chr1 | 78444763  | 78445281  | FUBP1         | ENSG00000162613 | -252  | 0.75 | 0.4  | 0.0015 | 0.35  | NA |
| chr1 | 9131602   | 9131909   | SLC2A5        | ENSG00000142583 | 31    | 0.98 | 0.87 | 0.0016 | 0.11  | NA |
| chr1 | 33168019  | 33168865  | SYNC          | ENSG00000162520 | -81   | 0.53 | 0.2  | 0.0016 | 0.33  | NA |
| chr1 | 6051595   | 6052955   | KCNAB2        | ENSG00000069424 | -148  | 0.35 | 0.22 | 0.0017 | 0.13  | NA |
| chr1 | 145096393 | 145096784 | SEC22B        | ENSG00000223380 | 57    | 0.33 | 0.2  | 0.0017 | 0.14  | NA |
| chr1 | 2316353   | 2316749   | MORN1         | ENSG00000116151 | 9     | 0.24 | 0.58 | 0.0018 | -0.35 | NA |
| chr1 | 38229838  | 38230888  | EPHA10        | ENSG00000183317 | 375   | 0.28 | 0.17 | 0.0018 | 0.11  | NA |
| chr1 | 70819733  | 70820719  | ANKRD13C      | ENSG00000118454 | 179   | 0.3  | 0.18 | 0.0018 | 0.12  | NA |
| chr1 | 87617692  | 87617986  | AL139139.1    | ENSG00000221222 | 858   | 0.82 | 0.56 | 0.0018 | 0.26  | NA |
| chr1 | 149783524 | 149784024 | HIST2H2BF     | ENSG00000203814 | 119   | 0.15 | 1    | 0.0018 | -0.85 | NA |
| chr1 | 155178547 | 155178980 | MTX1          | ENSG00000173171 | 175   | 0.37 | 0.1  | 0.0018 | 0.27  | NA |
| chr1 | 228327508 | 228328560 | GUK1          | ENSG00000143774 | 371   | 0.26 | 0.17 | 0.0018 | 0.086 | NA |
| chr1 | 1072369   | 1072847   | RP11-465B22.5 | ENSG00000223823 | 211   | 0.49 | 0.25 | 0.0019 | 0.24  | NA |
| chr1 | 116518757 | 116519537 | SLC22A15      | ENSG00000163393 | 28    | 0.4  | 0.17 | 0.0019 | 0.24  | NA |
| chr1 | 145516038 | 145516637 | GNRHR2        | ENSG00000211451 | -261  | 1    | 0.14 | 0.0019 | 0.86  | NA |
| chr1 | 18808873  | 18809667  | KLHDC7A       | ENSG00000179023 | 1605  | 0.66 | 0.55 | 0.002  | 0.12  | NA |
| chr1 | 27021833  | 27024101  | ARID1A        | ENSG00000117713 | 443   | 0.24 | 0.16 | 0.002  | 0.079 | NA |
| chr1 | 27929705  | 27930866  | AHDC1         | ENSG00000126705 | -360  | 0.3  | 0.17 | 0.002  | 0.13  | NA |
| chr1 | 156828804 | 156831102 | INSRR         | ENSG00000027644 | -1143 | 0.34 | 0.21 | 0.002  | 0.13  | NA |
| chr1 | 1713639   | 1714141   | NADK          | ENSG00000008130 | -1994 | 0.54 | 0.29 | 0.0022 | 0.25  | NA |
| chr1 | 155579732 | 155580328 | MSTO1         | ENSG00000125459 | 51    | 0.16 | 0.43 | 0.0022 | -0.27 | NA |
| chr1 | 25756470  | 25758115  | RHCE          | ENSG00000188672 | -609  | 0.23 | 0.16 | 0.0023 | 0.072 | NA |
| chr1 | 149671991 | 149673412 | AL358813.4    | ENSG00000242904 | 275   | 0.33 | 0.16 | 0.0023 | 0.17  | NA |
| chr1 | 154474107 | 154475699 | SHE           | ENSG00000169291 | -314  | 0.31 | 0.22 | 0.0023 | 0.091 | NA |

|      |           |           |               |                 |       |      |      |        |        |    |
|------|-----------|-----------|---------------|-----------------|-------|------|------|--------|--------|----|
| chr1 | 1267435   | 1268986   | TAS1R3        | ENSG00000169962 | 1516  | 0.45 | 0.33 | 0.0024 | 0.13   | NA |
| chr1 | 16301902  | 16302672  | ZBTB17        | ENSG00000116809 | 287   | 0.42 | 0.19 | 0.0024 | 0.23   | NA |
| chr1 | 22379009  | 22380029  | CDC42         | ENSG00000070831 | 399   | 0.18 | 0.35 | 0.0024 | -0.17  | NA |
| chr1 | 205312493 | 205313576 | KLHDC8A       | ENSG00000162873 | 276   | 0.31 | 0.23 | 0.0024 | 0.084  | NA |
| chr1 | 214724104 | 214725056 | PTPN14        | ENSG00000152104 | -14   | 0.35 | 0.22 | 0.0024 | 0.12   | NA |
| chr1 | 1355159   | 1356000   | RP4-758J18.6  | ENSG00000235098 | -46   | 0.26 | 0.14 | 0.0025 | 0.12   | NA |
| chr1 | 45097281  | 45098049  | RNF220        | ENSG00000187147 | 31    | 0.39 | 0.19 | 0.0025 | 0.2    | NA |
| chr1 | 112281052 | 112283277 | C1orf183      | ENSG00000197852 | -289  | 0.34 | 0.22 | 0.0025 | 0.12   | NA |
| chr1 | 156561485 | 156561880 | APOA1BP       | ENSG00000163382 | 140   | 0.53 | 0.16 | 0.0025 | 0.37   | NA |
| chr1 | 178693968 | 178695075 | RALGPS2       | ENSG00000116191 | 221   | 0.24 | 0.13 | 0.0025 | 0.11   | NA |
| chr1 | 27675919  | 27678016  | SYTL1         | ENSG00000142765 | 1000  | 0.54 | 0.65 | 0.0026 | -0.11  | NA |
| chr1 | 160175132 | 160175702 | PEA15         | ENSG00000162734 | 247   | 0.24 | 0.11 | 0.0026 | 0.14   | NA |
| chr1 | 184723252 | 184724438 | EDEM3         | ENSG00000116406 | -144  | 0.28 | 0.19 | 0.0026 | 0.088  | NA |
| chr1 | 249200252 | 249200721 | PGBD2         | ENSG00000185220 | 91    | 0.32 | 0.14 | 0.0026 | 0.17   | NA |
| chr1 | 39956424  | 39958137  | BMP8A         | ENSG00000183682 | -38   | 0.27 | 0.17 | 0.0027 | 0.094  | NA |
| chr1 | 224370585 | 224371755 | DEGS1         | ENSG00000143753 | 297   | 0.41 | 0.26 | 0.0027 | 0.15   | NA |
| chr1 | 33938025  | 33938328  | ZSCAN20       | ENSG00000121903 | -56   | 0.69 | 0.27 | 0.0028 | 0.43   | NA |
| chr1 | 91183240  | 91184540  | BARHL2        | ENSG00000143032 | -1096 | 0.33 | 0.17 | 0.0028 | 0.16   | NA |
| chr1 | 6239237   | 6240814   | CHD5          | ENSG00000116254 | 58    | 0.27 | 0.16 | 0.0029 | 0.11   | NA |
| chr1 | 12251777  | 12251985  | TNFRSF1B      | ENSG00000028137 | -14   | 0.78 | 0.94 | 0.0029 | -0.16  | NA |
| chr1 | 20960045  | 20960551  | PINK1         | ENSG00000158828 | 350   | 0.27 | 0.14 | 0.003  | 0.12   | NA |
| chr1 | 185014369 | 185015220 | RNF2          | ENSG00000121481 | 298   | 0.28 | 0.18 | 0.003  | 0.097  | NA |
| chr1 | 86174041  | 86174253  | ZNHIT6        | ENSG00000117174 | -46   | 0.17 | 0.38 | 0.0031 | -0.21  | NA |
| chr1 | 186344124 | 186344848 | TPR           | ENSG00000047410 | -29   | 0.31 | 0.16 | 0.0031 | 0.14   | NA |
| chr1 | 113392142 | 113392807 | RP11-426L16.8 | ENSG00000215866 | -73   | 0.34 | 0.18 | 0.0032 | 0.16   | NA |
| chr1 | 148903433 | 148903658 | RP11-14N7.1   | ENSG00000175658 | 1203  | 0.9  | 0.97 | 0.0033 | -0.068 | NA |
| chr1 | 200707849 | 200708948 | CAMSAP1L1     | ENSG00000118200 | -288  | 0.31 | 0.2  | 0.0033 | 0.11   | NA |
| chr1 | 206730397 | 206730908 | RASSF5        | ENSG00000136653 | 159   | 0.32 | 0.15 | 0.0035 | 0.16   | NA |
| chr1 | 1149055   | 1149524   | TNFRSF4       | ENSG00000186827 | 223   | 0.54 | 0.76 | 0.0036 | -0.22  | NA |
| chr1 | 21503115  | 21503836  | EIF4G3        | ENSG00000075151 | -135  | 0.34 | 0.2  | 0.0037 | 0.15   | NA |

|      |           |           |              |                 |      |      |      |        |        |    |
|------|-----------|-----------|--------------|-----------------|------|------|------|--------|--------|----|
| chr1 | 205818898 | 205819191 | PM20D1       | ENSG00000162877 | 201  | 0.51 | 0.69 | 0.0038 | -0.18  | NA |
| chr1 | 231113871 | 231114873 | TTC13        | ENSG00000143643 | 170  | 0.26 | 0.17 | 0.0038 | 0.089  | NA |
| chr1 | 2411125   | 2411404   | PLCH2        | ENSG00000149527 | -63  | 0.89 | 0.73 | 0.0039 | 0.16   | NA |
| chr1 | 36771830  | 36773009  | SH3D21       | ENSG00000214193 | 431  | 0.29 | 0.2  | 0.0039 | 0.097  | NA |
| chr1 | 212587591 | 212588284 | TMEM206      | ENSG00000065600 | 300  | 0.32 | 0.15 | 0.0039 | 0.16   | NA |
| chr1 | 224544523 | 224545224 | CNIH4        | ENSG00000143771 | 321  | 0.26 | 0.16 | 0.0039 | 0.1    | NA |
| chr1 | 161228477 | 161229028 | PCP4L1       | ENSG00000248485 | 235  | 0.25 | 0.14 | 0.004  | 0.11   | NA |
| chr1 | 27191066  | 27191911  | SFN          | ENSG00000175793 | 1784 | 0.25 | 0.14 | 0.0042 | 0.11   | NA |
| chr1 | 67218079  | 67218293  | TCTEX1D1     | ENSG00000152760 | 44   | 0.42 | 0.18 | 0.0042 | 0.24   | NA |
| chr1 | 181057503 | 181059176 | IER5         | ENSG00000162783 | 701  | 0.25 | 0.18 | 0.0042 | 0.071  | NA |
| chr1 | 235811841 | 235814066 | GNG4         | ENSG00000168243 | 340  | 0.27 | 0.2  | 0.0042 | 0.075  | NA |
| chr1 | 43147500  | 43149016  | YBX1         | ENSG00000065978 | 160  | 0.25 | 0.14 | 0.0043 | 0.1    | NA |
| chr1 | 12040113  | 12040793  | MFN2         | ENSG00000116688 | 215  | 0.27 | 0.17 | 0.0044 | 0.1    | NA |
| chr1 | 226069605 | 226070898 | TMEM63A      | ENSG00000196187 | -182 | 0.32 | 0.22 | 0.0044 | 0.1    | NA |
| chr1 | 228467964 | 228468497 | OBSCN        | ENSG00000154358 | -244 | 0.91 | 0.99 | 0.0044 | -0.079 | NA |
| chr1 | 6557561   | 6557872   | PLEKHG5      | ENSG00000171680 | -232 | 0.47 | 0.16 | 0.0045 | 0.31   | NA |
| chr1 | 39980365  | 39981768  | OXCT2P1      | ENSG00000237624 | 438  | 0.44 | 0.18 | 0.0045 | 0.26   | NA |
| chr1 | 180881316 | 180882592 | KIAA1614     | ENSG00000135835 | -336 | 0.25 | 0.17 | 0.0046 | 0.082  | NA |
| chr1 | 1534331   | 1536136   | RP11-345P4.5 | ENSG00000228594 | 243  | 0.36 | 0.22 | 0.0047 | 0.14   | NA |
| chr1 | 11538669  | 11540342  | PTCHD2       | ENSG00000204624 | 282  | 0.25 | 0.18 | 0.0047 | 0.068  | NA |
| chr1 | 29447699  | 29451847  | TMEM200B     | ENSG00000253304 | -760 | 0.31 | 0.25 | 0.0049 | 0.056  | NA |
| chr1 | 207627531 | 207628280 | CR2          | ENSG00000117322 | 330  | 0.24 | 0.14 | 0.0049 | 0.095  | NA |
| chr1 | 226111642 | 226112552 | PYCR2        | ENSG00000143811 | -404 | 0.24 | 0.14 | 0.0049 | 0.099  | NA |
| chr1 | 57887963  | 57890637  | DAB1         | ENSG00000173406 | 429  | 0.24 | 0.16 | 0.005  | 0.074  | NA |
| chr1 | 156616553 | 156616946 | BCAN         | ENSG00000132692 | -171 | 0.83 | 0.69 | 0.005  | 0.15   | NA |
| chr1 | 247681399 | 247681951 | C1orf150     | ENSG00000169224 | -59  | 0.54 | 0.4  | 0.005  | 0.15   | NA |
| chr1 | 9242167   | 9243827   | RP3-510D11.2 | ENSG00000234546 | 726  | 0.29 | 0.2  | 0.0051 | 0.098  | NA |
| chr1 | 2005179   | 2005565   | PRKCZ        | ENSG00000067606 | -53  | 0.41 | 0.26 | 0.0053 | 0.15   | NA |
| chr1 | 23857033  | 23858089  | E2F2         | ENSG00000007968 | 151  | 0.24 | 0.15 | 0.0056 | 0.09   | NA |
| chr1 | 32110210  | 32110961  | PEF1         | ENSG00000162517 | -111 | 0.33 | 1    | 0.0057 | -0.67  | NA |

|      |           |           |              |                 |       |      |      |        |       |    |
|------|-----------|-----------|--------------|-----------------|-------|------|------|--------|-------|----|
| chr1 | 106623393 | 106623854 | RP5-947P14.1 | ENSG00000237480 | -160  | 0.79 | 0.58 | 0.0057 | 0.21  | NA |
| chr1 | 235291740 | 235292387 | TOMM20       | ENSG00000173726 | 188   | 0.15 | 0.34 | 0.0057 | -0.19 | NA |
| chr1 | 53018258  | 53019599  | ZCCHC11      | ENSG00000134744 | -274  | 0.29 | 0.18 | 0.0058 | 0.11  | NA |
| chr1 | 149149250 | 149149505 | AL356957.3   | ENSG00000243493 | -1382 | 0.5  | 0.2  | 0.0058 | 0.3   | NA |
| chr1 | 33646613  | 33647878  | TRIM62       | ENSG00000116525 | 22    | 0.22 | 0.41 | 0.0061 | -0.19 | NA |
| chr1 | 967966    | 970238    | AGRN         | ENSG00000188157 | -384  | 0.31 | 0.21 | 0.0064 | 0.098 | NA |
| chr1 | 20878894  | 20880592  | FAM43B       | ENSG00000183114 | 811   | 0.24 | 0.16 | 0.0064 | 0.077 | NA |
| chr1 | 37980071  | 37980565  | MEAF6        | ENSG00000163875 | -50   | 0.52 | 0.25 | 0.0064 | 0.27  | NA |
| chr1 | 39874018  | 39875239  | KIAA0754     | ENSG00000255103 | -1523 | 0.29 | 0.19 | 0.0064 | 0.11  | NA |
| chr1 | 149784592 | 149785212 | HIST2H3D     | ENSG00000183598 | 334   | 0.67 | 0.26 | 0.0064 | 0.41  | NA |
| chr1 | 204380313 | 204381159 | PPP1R15B     | ENSG00000158615 | 183   | 0.28 | 0.19 | 0.0064 | 0.093 | NA |
| chr1 | 212780151 | 212783086 | ATF3         | ENSG00000162772 | -394  | 0.26 | 0.2  | 0.0067 | 0.063 | NA |
| chr1 | 32403387  | 32404382  | PTP4A2       | ENSG00000184007 | -483  | 0.3  | 0.19 | 0.0068 | 0.11  | NA |
| chr1 | 45271679  | 45272318  | TCTEX1D4     | ENSG00000188396 | 349   | 0.96 | 0.83 | 0.0068 | 0.13  | NA |
| chr1 | 50513644  | 50514320  | ELAVL4       | ENSG00000162374 | 296   | 0.63 | 0.22 | 0.0068 | 0.4   | NA |
| chr1 | 101702445 | 101702745 | S1PR1        | ENSG00000170989 | 136   | 0.26 | 0.1  | 0.0069 | 0.16  | NA |
| chr1 | 43996724  | 43997592  | PTPRF        | ENSG00000142949 | 584   | 0.43 | 0.24 | 0.0072 | 0.19  | NA |
| chr1 | 90286189  | 90287222  | LRRRC8D      | ENSG00000171492 | 132   | 0.29 | 0.2  | 0.0073 | 0.09  | NA |
| chr1 | 93913636  | 93914524  | FNBP1L       | ENSG00000137942 | 422   | 0.26 | 0.17 | 0.0073 | 0.091 | NA |
| chr1 | 6520584   | 6521955   | ESPN         | ENSG00000187017 | 701   | 0.93 | 0.85 | 0.0076 | 0.071 | NA |
| chr1 | 6208716   | 6209039   | CHD5         | ENSG00000116254 | -1976 | 0.28 | 0.55 | 0.008  | -0.26 | NA |
| chr1 | 26560449  | 26561028  | CEP85        | ENSG00000130695 | 47    | 0.35 | 0.16 | 0.008  | 0.19  | NA |
| chr1 | 1550453   | 1552015   | MIB2         | ENSG00000197530 | 439   | 0.22 | 0.16 | 0.0081 | 0.059 | NA |
| chr1 | 155829109 | 155829431 | GON4L        | ENSG00000116580 | -79   | 0.52 | 0.12 | 0.0082 | 0.4   | NA |
| chr1 | 246729207 | 246730276 | TFB2M        | ENSG00000162851 | -178  | 0.2  | 0.13 | 0.0082 | 0.07  | NA |
| chr1 | 17075404  | 17075680  | RP1-163M9.5  | ENSG00000227684 | -1186 | 0.92 | 0.74 | 0.0083 | 0.18  | NA |
| chr1 | 151735445 | 151736093 | OAZ3         | ENSG00000143450 | 324   | 0.3  | 0.19 | 0.0083 | 0.12  | NA |
| chr1 | 218520287 | 218520506 | TGFB2        | ENSG00000092969 | 16    | 0.68 | 0.33 | 0.0083 | 0.35  | NA |
| chr1 | 40782220  | 40783145  | COL9A2       | ENSG00000049089 | -320  | 0.3  | 0.2  | 0.0085 | 0.11  | NA |
| chr1 | 9970584   | 9970790   | CTNNBIP1     | ENSG00000178585 | -293  | 0.26 | 0.12 | 0.0086 | 0.14  | NA |

|      |           |           |               |                 |      |      |      |        |       |    |
|------|-----------|-----------|---------------|-----------------|------|------|------|--------|-------|----|
| chr1 | 169074766 | 169076411 | ATP1B1        | ENSG00000143153 | 653  | 0.26 | 0.18 | 0.0086 | 0.074 | NA |
| chr1 | 203242519 | 203242818 | CHIT1         | ENSG00000133063 | 101  | 0.41 | 0.24 | 0.0087 | 0.17  | NA |
| chr1 | 15943821  | 15944356  | DDI2          | ENSG00000197312 | 93   | 0.34 | 0.2  | 0.009  | 0.15  | NA |
| chr1 | 76189916  | 76190730  | ACADM         | ENSG00000117054 | 287  | 0.31 | 0.2  | 0.009  | 0.12  | NA |
| chr1 | 99126872  | 99127711  | SNX7          | ENSG00000162627 | 55   | 0.27 | 0.16 | 0.009  | 0.11  | NA |
| chr1 | 182991804 | 182993370 | LAMC1         | ENSG00000135862 | -10  | 0.29 | 0.2  | 0.009  | 0.082 | NA |
| chr1 | 121137784 | 121139057 | AL592494.5    | ENSG00000227082 | -194 | 0.43 | 0.31 | 0.0091 | 0.12  | NA |
| chr1 | 207226281 | 207226842 | YOD1          | ENSG00000180667 | -236 | 0.28 | 0.14 | 0.0092 | 0.15  | NA |
| chr1 | 27816342  | 27816853  | WASF2         | ENSG00000158195 | -35  | 0.44 | 0.27 | 0.0093 | 0.17  | NA |
| chr1 | 221054554 | 221054888 | HLX           | ENSG00000136630 | 137  | 0.9  | 0.62 | 0.0093 | 0.28  | NA |
| chr1 | 157015149 | 157016229 | ARHGEF11      | ENSG00000132694 | -527 | 0.29 | 0.2  | 0.0094 | 0.095 | NA |
| chr1 | 42800265  | 42801370  | FOXJ3         | ENSG00000198815 | -181 | 0.25 | 0.18 | 0.0096 | 0.077 | NA |
| chr1 | 110008962 | 110010124 | SYPL2         | ENSG00000143028 | 363  | 0.21 | 0.31 | 0.0098 | -0.1  | NA |
| chr1 | 226249457 | 226251457 | H3F3A         | ENSG00000163041 | 905  | 0.31 | 0.22 | 0.0098 | 0.091 | NA |
| chr1 | 35250418  | 35250736  | GJB3          | ENSG00000188910 | 213  | 0.85 | 0.96 | 0.0099 | -0.11 | NA |
| chr1 | 221055492 | 221055800 | HLX           | ENSG00000136630 | 1062 | 0.98 | 0.79 | 0.01   | 0.19  | NA |
| chr1 | 21112708  | 21114121  | HP1BP3        | ENSG00000127483 | -638 | 0.28 | 0.17 | 0.011  | 0.1   | NA |
| chr1 | 38455232  | 38455769  | SF3A3         | ENSG00000183431 | -178 | 0.2  | 0.1  | 0.011  | 0.11  | NA |
| chr1 | 54870853  | 54872476  | SSBP3         | ENSG00000157216 | -487 | 0.26 | 0.17 | 0.011  | 0.088 | NA |
| chr1 | 101701785 | 101702068 | RP4-575N6.4   | ENSG00000225938 | 158  | 0.38 | 0.18 | 0.011  | 0.2   | NA |
| chr1 | 212457967 | 212459694 | PPP2R5A       | ENSG00000066027 | 48   | 0.27 | 0.18 | 0.011  | 0.09  | NA |
| chr1 | 1859246   | 1859523   | C1orf222      | ENSG00000142609 | -16  | 0.31 | 0.51 | 0.012  | -0.2  | NA |
| chr1 | 1950411   | 1951479   | GABRD         | ENSG00000187730 | 165  | 0.27 | 0.17 | 0.012  | 0.098 | NA |
| chr1 | 17865863  | 17866630  | ARHGEF10L     | ENSG00000074964 | -84  | 0.25 | 0.15 | 0.012  | 0.099 | NA |
| chr1 | 28286019  | 28286838  | RP11-460I13.2 | ENSG00000227050 | 276  | 0.27 | 0.2  | 0.012  | 0.076 | NA |
| chr1 | 40105010  | 40105707  | HEYL          | ENSG00000163909 | 259  | 0.28 | 0.18 | 0.012  | 0.099 | NA |
| chr1 | 41157162  | 41157975  | NFYC          | ENSG00000066136 | 248  | 0.42 | 0.19 | 0.012  | 0.23  | NA |
| chr1 | 52834139  | 52834528  | PLA2G12AP1    | ENSG00000224680 | -14  | 0.24 | 0.1  | 0.012  | 0.14  | NA |
| chr1 | 204463293 | 204464086 | PIK3C2B       | ENSG00000133056 | 140  | 0.38 | 0.25 | 0.012  | 0.13  | NA |
| chr1 | 8938098   | 8939409   | ENO1          | ENSG00000074800 | -427 | 0.27 | 0.17 | 0.013  | 0.098 | NA |

|      |           |           |          |                 |       |      |      |       |       |    |
|------|-----------|-----------|----------|-----------------|-------|------|------|-------|-------|----|
| chr1 | 33814783  | 33815770  | PHC2     | ENSG00000134686 | -25   | 0.43 | 0.27 | 0.013 | 0.16  | NA |
| chr1 | 62784136  | 62785133  | KANK4    | ENSG00000132854 | 338   | 0.26 | 0.16 | 0.013 | 0.1   | NA |
| chr1 | 63833109  | 63833821  | ALG6     | ENSG00000088035 | 204   | 0.38 | 0.23 | 0.013 | 0.14  | NA |
| chr1 | 168147963 | 168148637 | TIPRL    | ENSG00000143155 | 129   | 0.25 | 0.16 | 0.013 | 0.091 | NA |
| chr1 | 11985643  | 11986634  | KIAA2013 | ENSG00000116685 | 342   | 0.32 | 0.21 | 0.014 | 0.11  | NA |
| chr1 | 24969027  | 24970196  | SRRM1    | ENSG00000133226 | 17    | 0.25 | 0.18 | 0.014 | 0.066 | NA |
| chr1 | 36590761  | 36591121  | COL8A2   | ENSG00000171812 | -120  | 0.36 | 0.19 | 0.014 | 0.16  | NA |
| chr1 | 114301514 | 114302272 | PHTF1    | ENSG00000116793 | -116  | 0.24 | 0.17 | 0.014 | 0.076 | NA |
| chr1 | 155112976 | 155113179 | DPM3     | ENSG00000179085 | -57   | 0.28 | 1    | 0.014 | -0.72 | NA |
| chr1 | 169862455 | 169862722 | SCYL3    | ENSG00000000457 | 488   | 0.25 | 0.83 | 0.014 | -0.58 | NA |
| chr1 | 179711947 | 179713951 | FAM163A  | ENSG00000143340 | 651   | 0.24 | 0.18 | 0.014 | 0.063 | NA |
| chr1 | 228269729 | 228271501 | ARF1     | ENSG00000143761 | 254   | 0.28 | 0.21 | 0.014 | 0.077 | NA |
| chr1 | 247614695 | 247614944 | OR2B11   | ENSG00000177535 | 489   | 0.85 | 1    | 0.014 | -0.15 | NA |
| chr1 | 1203166   | 1203597   | UBE2J2   | ENSG00000160087 | -1878 | 0.96 | 0.85 | 0.015 | 0.12  | NA |
| chr1 | 7740143   | 7741117   | CAMTA1   | ENSG00000171735 | 482   | 0.3  | 0.2  | 0.015 | 0.1   | NA |
| chr1 | 25558563  | 25559178  | SYF2     | ENSG00000117614 | 53    | 0.34 | 0.21 | 0.015 | 0.12  | NA |
| chr1 | 53791687  | 53793496  | LRP8     | ENSG00000157193 | 480   | 0.32 | 0.21 | 0.015 | 0.11  | NA |
| chr1 | 57110663  | 57111337  | PPAP2B   | ENSG00000162407 | -55   | 0.32 | 0.18 | 0.015 | 0.15  | NA |
| chr1 | 94311844  | 94313086  | MIR760   | ENSG00000211575 | 77    | 0.26 | 0.16 | 0.015 | 0.1   | NA |
| chr1 | 95391837  | 95393116  | CNN3     | ENSG00000117519 | 162   | 0.25 | 0.18 | 0.015 | 0.073 | NA |
| chr1 | 111148983 | 111150186 | KCNA2    | ENSG00000177301 | -598  | 0.21 | 0.14 | 0.015 | 0.07  | NA |
| chr1 | 155147185 | 155147444 | TRIM46   | ENSG00000163462 | 84    | 0.33 | 0.17 | 0.015 | 0.15  | NA |
| chr1 | 161136001 | 161136686 | PPOX     | ENSG00000143224 | 143   | 0.4  | 0.24 | 0.015 | 0.17  | NA |
| chr1 | 161575534 | 161576908 | HSPA7    | ENSG00000225217 | 140   | 0.43 | 0.61 | 0.015 | -0.18 | NA |
| chr1 | 172412867 | 172413281 | PIGC     | ENSG00000135845 | 12    | 0.36 | 0.16 | 0.015 | 0.2   | NA |
| chr1 | 205718238 | 205719345 | NUCKS1   | ENSG00000069275 | 502   | 0.33 | 0.17 | 0.015 | 0.17  | NA |
| chr1 | 249152411 | 249153419 | ZNF692   | ENSG00000171163 | -392  | 0.35 | 0.21 | 0.015 | 0.14  | NA |
| chr1 | 875730    | 878363    | SAMD11   | ENSG00000187634 | 590   | 0.31 | 0.24 | 0.016 | 0.071 | NA |
| chr1 | 2322481   | 2323764   | MORN1    | ENSG00000116151 | -12   | 0.31 | 0.23 | 0.016 | 0.078 | NA |
| chr1 | 46216233  | 46216514  | IPP      | ENSG00000197429 | -52   | 0.21 | 0.53 | 0.016 | -0.32 | NA |



|      |           |           |               |                 |       |      |      |       |        |    |
|------|-----------|-----------|---------------|-----------------|-------|------|------|-------|--------|----|
| chr1 | 168105316 | 168106158 | GPR161        | ENSG00000143147 | -116  | 0.32 | 0.21 | 0.016 | 0.12   | NA |
| chr1 | 212606105 | 212606844 | NENF          | ENSG00000117691 | 245   | 0.32 | 0.17 | 0.016 | 0.15   | NA |
| chr1 | 28157221  | 28157788  | PPP1R8        | ENSG00000117751 | 215   | 0.32 | 0.18 | 0.017 | 0.13   | NA |
| chr1 | 33219427  | 33220028  | KIAA1522      | ENSG00000162522 | 107   | 0.24 | 0.13 | 0.017 | 0.1    | NA |
| chr1 | 40366595  | 40368213  | MYCL1         | ENSG00000116990 | 150   | 0.23 | 0.17 | 0.017 | 0.054  | NA |
| chr1 | 47133674  | 47134395  | ATPAF1        | ENSG00000123472 | -260  | 0.29 | 0.13 | 0.017 | 0.16   | NA |
| chr1 | 55446087  | 55446846  | TMEM61        | ENSG00000143001 | 1     | 0.32 | 0.13 | 0.017 | 0.19   | NA |
| chr1 | 173638662 | 173639045 | ANKRD45       | ENSG00000183831 | 118   | 0.31 | 0.17 | 0.017 | 0.15   | NA |
| chr1 | 179923716 | 179924419 | CEP350        | ENSG00000135837 | 194   | 0.41 | 0.21 | 0.017 | 0.2    | NA |
| chr1 | 211589677 | 211590293 | SNX25P1       | ENSG00000236809 | -382  | 0.28 | 0.16 | 0.017 | 0.12   | NA |
| chr1 | 228651447 | 228652529 | HIST3H2BA     | ENSG00000181201 | 307   | 0.27 | 0.19 | 0.017 | 0.082  | NA |
| chr1 | 805198    | 805628    | FAM41C        | ENSG00000230368 | 168   | 0.23 | 0.11 | 0.018 | 0.12   | NA |
| chr1 | 994436    | 995303    | RP11-465B22.3 | ENSG00000217801 | -245  | 0.22 | 0.15 | 0.018 | 0.07   | NA |
| chr1 | 1474962   | 1475220   | C1orf70       | ENSG00000205090 | 646   | 0.31 | 0.12 | 0.018 | 0.19   | NA |
| chr1 | 1558587   | 1559359   | MIB2          | ENSG00000197530 | 12    | 0.89 | 0.95 | 0.018 | -0.057 | NA |
| chr1 | 27960567  | 27961023  | FGR           | ENSG00000000938 | 850   | 0.23 | 0.14 | 0.018 | 0.084  | NA |
| chr1 | 28844653  | 28845293  | RCC1          | ENSG00000180198 | 204   | 0.24 | 0.16 | 0.018 | 0.081  | NA |
| chr1 | 154599763 | 154600505 | ADAR          | ENSG00000160710 | 254   | 0.32 | 0.21 | 0.018 | 0.11   | NA |
| chr1 | 156720747 | 156722069 | HDGF          | ENSG00000143321 | -323  | 0.24 | 0.16 | 0.018 | 0.076  | NA |
| chr1 | 219347109 | 219347572 | LYPLAL1       | ENSG00000143353 | 154   | 0.4  | 0.12 | 0.018 | 0.28   | NA |
| chr1 | 11710459  | 11710788  | FBXO2         | ENSG00000116661 | 147   | 1    | 0.17 | 0.019 | 0.83   | NA |
| chr1 | 21616380  | 21617101  | ECE1          | ENSG00000117298 | 10    | 0.33 | 0.22 | 0.019 | 0.12   | NA |
| chr1 | 27994727  | 27995031  | RP11-288L9.4  | ENSG00000225886 | -1100 | 0.75 | 1    | 0.019 | -0.25  | NA |
| chr1 | 59247461  | 59250940  | JUN           | ENSG00000177606 | 585   | 0.24 | 0.18 | 0.019 | 0.066  | NA |
| chr1 | 147737015 | 147737303 | U1            | ENSG00000199879 | 1408  | 0.75 | 0.43 | 0.019 | 0.32   | NA |
| chr1 | 16085147  | 16085862  | FBLIM1        | ENSG00000162458 | 249   | 0.47 | 0.3  | 0.02  | 0.17   | NA |
| chr1 | 33207636  | 33207874  | KIAA1522      | ENSG00000162522 | 269   | 0.12 | 0.25 | 0.02  | -0.14  | NA |
| chr1 | 33282675  | 33283906  | YARS          | ENSG00000134684 | -372  | 0.29 | 0.18 | 0.02  | 0.11   | NA |
| chr1 | 65613041  | 65614898  | AK4           | ENSG00000162433 | 737   | 0.23 | 0.17 | 0.02  | 0.057  | NA |
| chr1 | 207669637 | 207670015 | CR1           | ENSG00000203710 | 140   | 0.27 | 0.13 | 0.02  | 0.15   | NA |

|      |           |           |               |                 |       |      |      |       |        |    |
|------|-----------|-----------|---------------|-----------------|-------|------|------|-------|--------|----|
| chr1 | 229567206 | 229570684 | ACTA1         | ENSG00000143632 | -83   | 0.43 | 0.49 | 0.02  | -0.064 | NA |
| chr1 | 983174    | 983612    | AGRN          | ENSG00000188157 | -516  | 0.76 | 0.91 | 0.021 | -0.15  | NA |
| chr1 | 16481484  | 16482782  | RP11-276H7.2  | ENSG00000227959 | 427   | 0.32 | 0.24 | 0.021 | 0.083  | NA |
| chr1 | 116184380 | 116185561 | VANGL1        | ENSG00000173218 | 396   | 0.28 | 0.2  | 0.021 | 0.079  | NA |
| chr1 | 156022962 | 156025174 | UBQLN4        | ENSG00000160803 | -627  | 0.33 | 0.23 | 0.021 | 0.097  | NA |
| chr1 | 161284118 | 161284451 | SDHC          | ENSG00000143252 | 113   | 0.15 | 0.26 | 0.021 | -0.11  | NA |
| chr1 | 170630456 | 170630851 | PRRX1         | ENSG00000116132 | -1670 | 0.57 | 0.14 | 0.021 | 0.44   | NA |
| chr1 | 249132080 | 249133310 | ZNF672        | ENSG00000171161 | 286   | 0.24 | 0.15 | 0.021 | 0.088  | NA |
| chr1 | 4713989   | 4716555   | AJAP1         | ENSG00000196581 | 480   | 0.26 | 0.21 | 0.022 | 0.052  | NA |
| chr1 | 6265825   | 6266778   | RP1-120G22.11 | ENSG00000226944 | -461  | 0.3  | 0.23 | 0.022 | 0.072  | NA |
| chr1 | 6305148   | 6306463   | HES3          | ENSG00000173673 | 1553  | 0.32 | 0.22 | 0.022 | 0.097  | NA |
| chr1 | 115397448 | 115397942 | SYCP1         | ENSG00000198765 | 240   | 0.94 | 0.69 | 0.022 | 0.25   | NA |
| chr1 | 165796653 | 165797683 | UCK2          | ENSG00000143179 | 400   | 0.23 | 0.16 | 0.022 | 0.065  | NA |
| chr1 | 241520103 | 241520790 | RGS7          | ENSG00000182901 | -231  | 0.21 | 0.14 | 0.022 | 0.069  | NA |
| chr1 | 65210282  | 65211238  | RAVER2        | ENSG00000162437 | -18   | 0.38 | 0.21 | 0.023 | 0.17   | NA |
| chr1 | 119529819 | 119530712 | TBX15         | ENSG00000092607 | 163   | 0.35 | 0.22 | 0.023 | 0.13   | NA |
| chr1 | 153930546 | 153931130 | CRTC2         | ENSG00000160741 | -239  | 0.2  | 0.3  | 0.023 | -0.1   | NA |
| chr1 | 156877769 | 156878649 | PEAR1         | ENSG00000187800 | -1540 | 0.44 | 0.34 | 0.023 | 0.098  | NA |
| chr1 | 112531559 | 112533773 | KCND3         | ENSG00000171385 | -889  | 0.25 | 0.19 | 0.024 | 0.062  | NA |
| chr1 | 181382290 | 181382848 | CACNA1E       | ENSG00000198216 | 331   | 0.96 | 1    | 0.024 | -0.033 | NA |
| chr1 | 46913786  | 46914343  | RP5-1109J22.2 | ENSG00000224863 | 1312  | 0.39 | 0.28 | 0.025 | 0.11   | NA |
| chr1 | 110880942 | 110882800 | RBM15         | ENSG00000162775 | 743   | 0.35 | 0.23 | 0.025 | 0.12   | NA |
| chr1 | 143663818 | 143664138 | BX284650.1    | ENSG00000223804 | 9     | 1    | 0.34 | 0.025 | 0.66   | NA |
| chr1 | 244816199 | 244817080 | PPPDE1        | ENSG00000121644 | 402   | 0.26 | 0.18 | 0.025 | 0.084  | NA |
| chr1 | 26798366  | 26799842  | HMG2          | ENSG00000198830 | 163   | 0.27 | 0.15 | 0.026 | 0.12   | NA |
| chr1 | 28052145  | 28053002  | FAM76A        | ENSG0000009780  | 83    | 0.33 | 0.21 | 0.026 | 0.12   | NA |
| chr1 | 150039324 | 150039815 | VPS45         | ENSG00000136631 | 200   | 0.28 | 0.17 | 0.026 | 0.11   | NA |
| chr1 | 198125896 | 198126842 | NEK7          | ENSG00000151414 | 276   | 0.3  | 0.21 | 0.026 | 0.083  | NA |
| chr1 | 1247918   | 1248493   | CPSF3L        | ENSG00000127054 | -124  | 0.87 | 0.78 | 0.027 | 0.086  | NA |
| chr1 | 3342012   | 3342806   | PRDM16        | ENSG00000142611 | 926   | 0.85 | 0.92 | 0.027 | -0.074 | NA |

|      |           |           |              |                 |       |      |      |       |        |    |
|------|-----------|-----------|--------------|-----------------|-------|------|------|-------|--------|----|
| chr1 | 21995063  | 21995914  | RAP1GAP      | ENSG00000076864 | 288   | 0.25 | 0.16 | 0.027 | 0.088  | NA |
| chr1 | 156627342 | 156627576 | BCAN         | ENSG00000132692 | 938   | 0.19 | 0.35 | 0.027 | -0.17  | NA |
| chr1 | 200589552 | 200590124 | KIF14        | ENSG00000118193 | 24    | 0.22 | 0.39 | 0.027 | -0.17  | NA |
| chr1 | 205196791 | 205197252 | TMCC2        | ENSG00000133069 | -283  | 0.54 | 0.21 | 0.027 | 0.32   | NA |
| chr1 | 223536842 | 223538628 | SUSD4        | ENSG00000143502 | -538  | 0.32 | 0.24 | 0.027 | 0.085  | NA |
| chr1 | 1018099   | 1018390   | C1orf159     | ENSG00000131591 | 1208  | 0.82 | 0.9  | 0.028 | -0.081 | NA |
| chr1 | 1396085   | 1396338   | ATAD3C       | ENSG00000215915 | -1652 | 0.7  | 0.87 | 0.028 | -0.17  | NA |
| chr1 | 12226876  | 12227712  | TNFRSF1B     | ENSG00000028137 | 234   | 0.25 | 0.18 | 0.028 | 0.073  | NA |
| chr1 | 161953616 | 161954039 | OLFML2B      | ENSG00000162745 | -96   | 0.87 | 0.97 | 0.028 | -0.1   | NA |
| chr1 | 6301695   | 6302856   | HES3         | ENSG00000173673 | -1977 | 0.38 | 0.26 | 0.029 | 0.13   | NA |
| chr1 | 10532177  | 10532800  | PEX14        | ENSG00000142655 | 143   | 0.31 | 0.2  | 0.029 | 0.11   | NA |
| chr1 | 16563544  | 16563799  | RSG1         | ENSG00000132881 | -176  | 0.33 | 0.14 | 0.029 | 0.2    | NA |
| chr1 | 32228347  | 32230252  | BAI2         | ENSG00000121753 | 224   | 0.22 | 0.16 | 0.029 | 0.059  | NA |
| chr1 | 60280624  | 60281048  | HOOK1        | ENSG00000134709 | -8    | 0.26 | 0.14 | 0.029 | 0.12   | NA |
| chr1 | 109618579 | 109618832 | TAF13        | ENSG00000197780 | -112  | 0.28 | 0.14 | 0.029 | 0.14   | NA |
| chr1 | 114695136 | 114696672 | SYT6         | ENSG00000134207 | -422  | 0.24 | 0.18 | 0.03  | 0.064  | NA |
| chr1 | 153643318 | 153643529 | ILF2         | ENSG00000143621 | 35    | 0.36 | 0.18 | 0.03  | 0.18   | NA |
| chr1 | 185125850 | 185126705 | TRMT1L       | ENSG00000121486 | -164  | 0.38 | 0.15 | 0.03  | 0.23   | NA |
| chr1 | 15479219  | 15481471  | TMEM51       | ENSG00000171729 | 116   | 0.25 | 0.32 | 0.031 | -0.07  | NA |
| chr1 | 36614855  | 36615462  | TRAPPC3      | ENSG00000054116 | -270  | 0.22 | 0.16 | 0.031 | 0.064  | NA |
| chr1 | 45205323  | 45205745  | KIF2C        | ENSG00000142945 | 44    | 0.25 | 0.11 | 0.031 | 0.15   | NA |
| chr1 | 224301835 | 224302472 | FBXO28       | ENSG00000143756 | 280   | 0.22 | 0.15 | 0.031 | 0.073  | NA |
| chr1 | 241587601 | 241587883 | RP11-527D7.1 | ENSG00000225554 | 44    | 0.22 | 0.37 | 0.031 | -0.15  | NA |
| chr1 | 6320137   | 6320942   | GPR153       | ENSG00000158292 | 496   | 0.22 | 0.14 | 0.032 | 0.081  | NA |
| chr1 | 36863211  | 36863603  | LSM10        | ENSG00000181817 | 72    | 0.44 | 0.31 | 0.032 | 0.13   | NA |
| chr1 | 38219702  | 38220012  | EPHA10       | ENSG00000183317 | -1191 | 0.24 | 0.11 | 0.032 | 0.13   | NA |
| chr1 | 46269099  | 46269820  | MAST2        | ENSG00000086015 | 174   | 0.13 | 0.26 | 0.032 | -0.13  | NA |
| chr1 | 68298371  | 68299315  | GNG12        | ENSG00000172380 | 276   | 0.34 | 0.25 | 0.032 | 0.096  | NA |
| chr1 | 25255527  | 25259005  | RUNX3        | ENSG00000020633 | -1654 | 0.26 | 0.22 | 0.033 | 0.046  | NA |
| chr1 | 44063469  | 44063757  | PTPRF        | ENSG00000142949 | -132  | 0.93 | 0.99 | 0.033 | -0.065 | NA |

|      |           |           |              |                 |       |      |      |       |        |    |
|------|-----------|-----------|--------------|-----------------|-------|------|------|-------|--------|----|
| chr1 | 179334794 | 179335338 | AXDND1       | ENSG00000162779 | 211   | 0.62 | 0.28 | 0.033 | 0.34   | NA |
| chr1 | 212964866 | 212965347 | NSL1         | ENSG00000117697 | -183  | 0.22 | 0.11 | 0.033 | 0.11   | NA |
| chr1 | 247274585 | 247275757 | C1orf229     | ENSG00000221953 | 548   | 0.19 | 0.27 | 0.033 | -0.075 | NA |
| chr1 | 1208515   | 1209942   | UBE2J2       | ENSG00000160087 | -377  | 0.22 | 0.15 | 0.034 | 0.071  | NA |
| chr1 | 24126799  | 24127549  | GALE         | ENSG00000117308 | -282  | 0.2  | 0.1  | 0.034 | 0.1    | NA |
| chr1 | 26146122  | 26147349  | RP1-317E23.3 | ENSG00000228172 | -501  | 0.25 | 0.18 | 0.034 | 0.067  | NA |
| chr1 | 53098629  | 53099303  | FAM159A      | ENSG00000182183 | -50   | 0.35 | 0.19 | 0.034 | 0.16   | NA |
| chr1 | 65731411  | 65731849  | DNAJC6       | ENSG00000116675 | 1183  | 0.27 | 0.17 | 0.034 | 0.095  | NA |
| chr1 | 94313317  | 94313628  | BCAR3        | ENSG00000137936 | -766  | 0.6  | 0.18 | 0.034 | 0.42   | NA |
| chr1 | 117452203 | 117453452 | PTGFRN       | ENSG00000134247 | 148   | 0.29 | 0.2  | 0.035 | 0.082  | NA |
| chr1 | 145610679 | 145611143 | POLR3C       | ENSG00000186141 | -181  | 0.19 | 0.4  | 0.035 | -0.21  | NA |
| chr1 | 212003431 | 212004280 | LPGAT1       | ENSG00000123684 | -275  | 0.35 | 0.25 | 0.035 | 0.1    | NA |
| chr1 | 10755226  | 10755521  | CASZ1        | ENSG00000130940 | -837  | 0.43 | 0.74 | 0.036 | -0.31  | NA |
| chr1 | 65532161  | 65533212  | RP4-535B20.1 | ENSG00000231485 | 734   | 0.33 | 0.22 | 0.036 | 0.11   | NA |
| chr1 | 114447454 | 114448024 | AP4B1        | ENSG00000134262 | -284  | 0.29 | 0.19 | 0.036 | 0.095  | NA |
| chr1 | 156542099 | 156542502 | IQGAP3       | ENSG00000183856 | 32    | 0.27 | 0.45 | 0.037 | -0.18  | NA |
| chr1 | 8763005   | 8763549   | RERE         | ENSG00000142599 | 1     | 0.28 | 0.19 | 0.038 | 0.087  | NA |
| chr1 | 32687521  | 32688040  | EIF3I        | ENSG00000084623 | 251   | 0.37 | 0.23 | 0.038 | 0.14   | NA |
| chr1 | 40041317  | 40042667  | PABPC4       | ENSG00000090621 | -539  | 0.21 | 0.15 | 0.038 | 0.058  | NA |
| chr1 | 52607400  | 52608504  | ZFYVE9       | ENSG00000157077 | -94   | 0.27 | 0.19 | 0.038 | 0.075  | NA |
| chr1 | 64971358  | 64971604  | CACHD1       | ENSG00000158966 | -117  | 0.75 | 0.19 | 0.038 | 0.56   | NA |
| chr1 | 85039825  | 85040344  | CTBS         | ENSG00000117151 | 20    | 0.31 | 0.19 | 0.038 | 0.12   | NA |
| chr1 | 109419544 | 109420038 | GPSM2        | ENSG00000121957 | 188   | 0.26 | 0.15 | 0.038 | 0.11   | NA |
| chr1 | 197871588 | 197872299 | C1orf53      | ENSG00000203724 | 166   | 0.33 | 0.22 | 0.038 | 0.11   | NA |
| chr1 | 40942784  | 40943387  | ZNF642       | ENSG00000187815 | 198   | 0.35 | 0.23 | 0.039 | 0.12   | NA |
| chr1 | 222885326 | 222886230 | AIDA         | ENSG00000186063 | -173  | 0.36 | 0.19 | 0.039 | 0.17   | NA |
| chr1 | 1342004   | 1342952   | MRPL20       | ENSG00000242485 | -100  | 0.17 | 0.24 | 0.04  | -0.064 | NA |
| chr1 | 36396249  | 36397262  | EIF2C3       | ENSG00000126070 | 436   | 0.19 | 0.14 | 0.04  | 0.053  | NA |
| chr1 | 53742297  | 53742845  | LRP8         | ENSG00000157193 | -1236 | 0.97 | 0.92 | 0.04  | 0.043  | NA |
| chr1 | 91316249  | 91317390  | RP4-665J23.1 | ENSG00000233593 | 356   | 0.22 | 0.15 | 0.04  | 0.068  | NA |

|      |           |           |               |                 |      |      |      |       |       |    |
|------|-----------|-----------|---------------|-----------------|------|------|------|-------|-------|----|
| chr1 | 10534918  | 10535172  | PEX14         | ENSG00000142655 | 101  | 0.12 | 0.33 | 0.041 | -0.21 | NA |
| chr1 | 110051954 | 110052505 | AMIGO1        | ENSG00000181754 | 75   | 0.34 | 0.2  | 0.041 | 0.14  | NA |
| chr1 | 110949892 | 110950540 | RP11-225L12.2 | ENSG00000224699 | 69   | 0.36 | 0.24 | 0.041 | 0.12  | NA |
| chr1 | 38259095  | 38260427  | MANEAL        | ENSG00000185090 | 287  | 0.27 | 0.2  | 0.042 | 0.063 | NA |
| chr1 | 109505681 | 109506214 | CLCC1         | ENSG00000121940 | 125  | 0.25 | 0.17 | 0.042 | 0.075 | NA |
| chr1 | 156051239 | 156051461 | MEX3A         | ENSG00000254726 | 145  | 0.38 | 0.65 | 0.042 | -0.26 | NA |
| chr1 | 202926879 | 202927476 | ADIPOR1       | ENSG00000159346 | 236  | 0.18 | 0.12 | 0.042 | 0.057 | NA |
| chr1 | 20810462  | 20813511  | CAMK2N1       | ENSG00000162545 | -848 | 0.22 | 0.17 | 0.043 | 0.051 | NA |
| chr1 | 51810327  | 51810687  | TTC39A        | ENSG00000085831 | 281  | 0.3  | 0.15 | 0.043 | 0.16  | NA |
| chr1 | 169763973 | 169764347 | METTL18       | ENSG00000171806 | -56  | 0.27 | 0.13 | 0.043 | 0.14  | NA |
| chr1 | 24018355  | 24018567  | RPL11         | ENSG00000142676 | 136  | 0.33 | 0.12 | 0.044 | 0.2   | NA |
| chr1 | 32221887  | 32222107  | BAI2          | ENSG00000121753 | -132 | 0.9  | 0.68 | 0.044 | 0.22  | NA |
| chr1 | 40915605  | 40916072  | ZNF643        | ENSG00000187801 | 64   | 0.24 | 0.14 | 0.044 | 0.1   | NA |
| chr1 | 184355415 | 184356811 | C1orf21       | ENSG00000116667 | -79  | 0.25 | 0.18 | 0.044 | 0.064 | NA |
| chr1 | 224805408 | 224805853 | CNIH3         | ENSG00000143786 | 1635 | 0.49 | 0.32 | 0.044 | 0.17  | NA |
| chr1 | 49242371  | 49242810  | BEND5         | ENSG00000162373 | -183 | 0.32 | 0.17 | 0.045 | 0.15  | NA |
| chr1 | 85665818  | 85667650  | SYDE2         | ENSG00000097096 | -538 | 0.21 | 0.17 | 0.045 | 0.048 | NA |
| chr1 | 151253658 | 151255769 | ZNF687        | ENSG00000143373 | 619  | 0.3  | 0.22 | 0.045 | 0.078 | NA |
| chr1 | 171750399 | 171750934 | METTL13       | ENSG0000010165  | -122 | 0.26 | 0.15 | 0.045 | 0.11  | NA |
| chr1 | 205743900 | 205744668 | RAB7L1        | ENSG00000117280 | -5   | 0.26 | 0.14 | 0.045 | 0.12  | NA |
| chr1 | 33366792  | 33367002  | TMEM54        | ENSG00000121900 | 56   | 0.19 | 0.56 | 0.046 | -0.37 | NA |
| chr1 | 114354373 | 114355300 | RSBN1         | ENSG00000081019 | 79   | 0.16 | 0.27 | 0.046 | -0.11 | NA |
| chr1 | 155292469 | 155295433 | RUSC1         | ENSG00000160753 | 1148 | 0.26 | 0.22 | 0.046 | 0.047 | NA |
| chr1 | 52521780  | 52522296  | BTF3L4        | ENSG00000134717 | 241  | 0.57 | 0.18 | 0.047 | 0.38  | NA |
| chr1 | 95006837  | 95008051  | F3            | ENSG00000117525 | -251 | 0.29 | 0.22 | 0.047 | 0.064 | NA |
| chr1 | 150521349 | 150522368 | ADAMTSL4      | ENSG00000143382 | -26  | 0.34 | 0.25 | 0.047 | 0.093 | NA |
| chr1 | 207082693 | 207083202 | FAIM3         | ENSG00000162894 | 343  | 0.33 | 0.15 | 0.047 | 0.18  | NA |
| chr1 | 46806339  | 46806836  | NSUN4         | ENSG00000117481 | 190  | 0.36 | 0.21 | 0.048 | 0.15  | NA |
| chr1 | 67519224  | 67520139  | SLC35D1       | ENSG00000116704 | 101  | 0.29 | 0.18 | 0.048 | 0.11  | NA |
| chr1 | 121260857 | 121261525 | EMBP1         | ENSG00000231752 | 48   | 0.23 | 0.15 | 0.048 | 0.084 | NA |

|      |           |           |               |                 |      |      |      |       |        |    |
|------|-----------|-----------|---------------|-----------------|------|------|------|-------|--------|----|
| chr1 | 228404148 | 228404397 | OBSCN         | ENSG00000154358 | 882  | 0.6  | 0.79 | 0.049 | -0.19  | NA |
| chr1 | 38022452  | 38022719  | DNALI1        | ENSG00000163879 | 65   | 0.26 | 0.58 | 0.05  | -0.32  | NA |
| chr1 | 22889595  | 22890096  | EPHA8         | ENSG00000070886 | -212 | 0.26 | 0.15 | 0.051 | 0.11   | NA |
| chr1 | 46859724  | 46860291  | FAAH          | ENSG00000117480 | 70   | 0.32 | 0.22 | 0.051 | 0.1    | NA |
| chr1 | 51425447  | 51426070  | FAF1          | ENSG00000185104 | -293 | 0.27 | 0.2  | 0.051 | 0.068  | NA |
| chr1 | 68150913  | 68152270  | GADD45A       | ENSG00000116717 | 232  | 0.2  | 0.27 | 0.051 | -0.073 | NA |
| chr1 | 148853996 | 148855761 | RP11-763B22.7 | ENSG00000223495 | -758 | 0.41 | 0.32 | 0.051 | 0.09   | NA |
| chr1 | 32740710  | 32741544  | LCK           | ENSG00000182866 | -94  | 0.35 | 0.23 | 0.052 | 0.11   | NA |
| chr1 | 44115616  | 44116309  | KDM4A         | ENSG00000066135 | 133  | 0.24 | 0.5  | 0.052 | -0.26  | NA |
| chr1 | 149646603 | 149646851 | RP11-353N4.2  | ENSG00000239903 | -895 | 0.71 | 0.94 | 0.052 | -0.23  | NA |
| chr1 | 231556681 | 231558447 | EGLN1         | ENSG00000135766 | -330 | 0.18 | 0.23 | 0.052 | -0.047 | NA |
| chr1 | 6844313   | 6846366   | RP11-312B8.1  | ENSG00000237436 | -436 | 0.23 | 0.18 | 0.053 | 0.046  | NA |
| chr1 | 45956345  | 45956893  | TESK2         | ENSG00000070759 | 196  | 0.15 | 0.38 | 0.053 | -0.24  | NA |
| chr1 | 91487158  | 91487807  | ZNF644        | ENSG00000122482 | -200 | 0.3  | 0.16 | 0.054 | 0.13   | NA |
| chr1 | 217804267 | 217804477 | GPATCH2       | ENSG00000092978 | 52   | 0.34 | 0.18 | 0.054 | 0.16   | NA |
| chr1 | 39570665  | 39571859  | MACF1         | ENSG00000127603 | 179  | 0.29 | 0.21 | 0.055 | 0.082  | NA |
| chr1 | 53392880  | 53393645  | ECHDC2        | ENSG00000121310 | -378 | 0.21 | 0.31 | 0.055 | -0.098 | NA |
| chr1 | 11333259  | 11333547  | UBIAD1        | ENSG00000120942 | 140  | 0.28 | 0.14 | 0.056 | 0.15   | NA |
| chr1 | 38099677  | 38100864  | RSPO1         | ENSG00000169218 | 18   | 0.26 | 0.2  | 0.056 | 0.058  | NA |
| chr1 | 101004471 | 101005885 | GPR88         | ENSG00000181656 | 1485 | 0.31 | 0.23 | 0.056 | 0.075  | NA |
| chr1 | 26856191  | 26856684  | RPS6KA1       | ENSG00000117676 | 185  | 0.22 | 0.13 | 0.057 | 0.092  | NA |
| chr1 | 165324191 | 165326328 | LMX1A         | ENSG00000162761 | -276 | 0.38 | 0.28 | 0.057 | 0.094  | NA |
| chr1 | 10698299  | 10698910  | CASZ1         | ENSG00000130940 | 216  | 0.95 | 0.89 | 0.058 | 0.064  | NA |
| chr1 | 43352785  | 43352994  | RP11-342M1.7  | ENSG00000233708 | 1549 | 1    | 0.78 | 0.058 | 0.22   | NA |
| chr1 | 205537751 | 205538443 | MFSD4         | ENSG00000174514 | 84   | 0.27 | 0.17 | 0.058 | 0.095  | NA |
| chr1 | 223936342 | 223937044 | CAPN2         | ENSG00000162909 | 1883 | 0.4  | 0.3  | 0.058 | 0.1    | NA |
| chr1 | 36022680  | 36023834  | KIAA0319L     | ENSG00000142687 | -281 | 0.25 | 0.18 | 0.059 | 0.068  | NA |
| chr1 | 65720047  | 65720592  | DNAJC6        | ENSG00000116675 | 174  | 0.24 | 0.16 | 0.059 | 0.082  | NA |
| chr1 | 1370767   | 1371449   | VWA1          | ENSG00000179403 | 205  | 0.33 | 0.2  | 0.06  | 0.12   | NA |
| chr1 | 150241047 | 150241654 | APH1A         | ENSG00000117362 | 49   | 0.27 | 0.17 | 0.06  | 0.091  | NA |

|      |           |           |              |                 |      |      |      |       |        |    |
|------|-----------|-----------|--------------|-----------------|------|------|------|-------|--------|----|
| chr1 | 179051075 | 179051948 | TOR3A        | ENSG00000186283 | 306  | 0.28 | 0.19 | 0.061 | 0.08   | NA |
| chr1 | 45769213  | 45769917  | AL359540.1   | ENSG00000246279 | 1725 | 0.25 | 0.34 | 0.062 | -0.092 | NA |
| chr1 | 201798213 | 201798698 | RP11-90L20.3 | ENSG00000231871 | -242 | 0.11 | 0.22 | 0.062 | -0.1   | NA |
| chr1 | 39324815  | 39325721  | RRAGC        | ENSG00000116954 | 227  | 0.24 | 0.17 | 0.063 | 0.069  | NA |
| chr1 | 53067880  | 53068608  | GPX7         | ENSG00000116157 | 200  | 0.24 | 0.18 | 0.063 | 0.061  | NA |
| chr1 | 150980735 | 150981092 | FAM63A       | ENSG00000143409 | -59  | 0.36 | 0.2  | 0.063 | 0.16   | NA |
| chr1 | 156890243 | 156890806 | LRRC71       | ENSG00000160838 | 82   | 0.21 | 0.31 | 0.063 | -0.098 | NA |
| chr1 | 248855030 | 248855470 | XX-CR54.1    | ENSG00000229703 | -242 | 0.76 | 0.68 | 0.063 | 0.084  | NA |
| chr1 | 107682889 | 107684463 | NTNG1        | ENSG00000162631 | 234  | 0.33 | 0.25 | 0.064 | 0.073  | NA |
| chr1 | 228194096 | 228196512 | WNT3A        | ENSG00000154342 | 552  | 0.27 | 0.21 | 0.064 | 0.066  | NA |
| chr1 | 44871109  | 44874047  | RNF220       | ENSG00000187147 | 1618 | 0.26 | 0.22 | 0.065 | 0.038  | NA |
| chr1 | 8483389   | 8484339   | RERE         | ENSG00000142599 | -385 | 0.22 | 0.17 | 0.066 | 0.052  | NA |
| chr1 | 20512360  | 20512797  | UBXN10       | ENSG00000162543 | 0    | 0.78 | 0.6  | 0.066 | 0.18   | NA |
| chr1 | 21671360  | 21672319  | ECE1         | ENSG00000117298 | -209 | 0.28 | 0.22 | 0.067 | 0.054  | NA |
| chr1 | 228674346 | 228675752 | RNF187       | ENSG00000168159 | 287  | 0.23 | 0.17 | 0.067 | 0.06   | NA |
| chr1 | 152008838 | 152009112 | S100A11      | ENSG00000163191 | 536  | 0.16 | 0.5  | 0.068 | -0.34  | NA |
| chr1 | 153918372 | 153919334 | DENND4B      | ENSG00000198837 | 319  | 0.27 | 0.21 | 0.068 | 0.06   | NA |
| chr1 | 156897199 | 156897796 | LRRC71       | ENSG00000160838 | 343  | 0.33 | 0.25 | 0.07  | 0.076  | NA |
| chr1 | 116915291 | 116916813 | ATP1A1       | ENSG00000163399 | 170  | 0.25 | 0.19 | 0.071 | 0.065  | NA |
| chr1 | 161129138 | 161129689 | RP11-297K8.2 | ENSG00000224985 | -274 | 0.27 | 0.18 | 0.071 | 0.085  | NA |
| chr1 | 228295368 | 228295569 | MRPL55       | ENSG00000162910 | 508  | 0.94 | 0.76 | 0.071 | 0.18   | NA |
| chr1 | 31538412  | 31538938  | PUM1         | ENSG00000134644 | -152 | 0.16 | 0.25 | 0.072 | -0.094 | NA |
| chr1 | 40626913  | 40627612  | RLF          | ENSG00000117000 | 217  | 0.21 | 0.14 | 0.072 | 0.065  | NA |
| chr1 | 161695637 | 161697298 | FCRLB        | ENSG00000162746 | 776  | 0.23 | 0.17 | 0.072 | 0.058  | NA |
| chr1 | 204797610 | 204797930 | NFASC        | ENSG00000163531 | -9   | 0.3  | 0.11 | 0.072 | 0.19   | NA |
| chr1 | 155145342 | 155145938 | KRTCAP2      | ENSG00000163463 | 74   | 0.18 | 0.29 | 0.073 | -0.11  | NA |
| chr1 | 161102107 | 161102536 | DEDD         | ENSG00000158796 | -81  | 0.23 | 0.13 | 0.073 | 0.1    | NA |
| chr1 | 11750701  | 11752651  | MAD2L2       | ENSG00000116670 | -142 | 0.25 | 0.31 | 0.074 | -0.063 | NA |
| chr1 | 109940074 | 109940894 | SORT1        | ENSG00000134243 | -1   | 0.24 | 0.17 | 0.074 | 0.073  | NA |
| chr1 | 144931339 | 144932626 | PDE4DIP      | ENSG00000178104 | -274 | 0.15 | 0.12 | 0.074 | 0.032  | NA |

|      |           |           |               |                 |       |      |      |       |        |    |
|------|-----------|-----------|---------------|-----------------|-------|------|------|-------|--------|----|
| chr1 | 161368863 | 161369932 | U6            | ENSG00000206921 | -1682 | 0.23 | 0.31 | 0.074 | -0.08  | NA |
| chr1 | 183386000 | 183387664 | NMNAT2        | ENSG00000157064 | 905   | 0.21 | 0.16 | 0.074 | 0.058  | NA |
| chr1 | 10458548  | 10459997  | PGD           | ENSG00000142657 | 623   | 0.23 | 0.17 | 0.075 | 0.055  | NA |
| chr1 | 65885856  | 65886704  | LEPR          | ENSG00000116678 | 32    | 0.17 | 0.24 | 0.075 | -0.073 | NA |
| chr1 | 205498003 | 205498590 | CDK18         | ENSG00000117266 | -26   | 0.28 | 0.18 | 0.075 | 0.1    | NA |
| chr1 | 227922643 | 227923431 | SNAP47        | ENSG00000143740 | 340   | 0.21 | 0.15 | 0.075 | 0.058  | NA |
| chr1 | 156710798 | 156711146 | MRPL24        | ENSG00000143314 | -92   | 0.25 | 0.53 | 0.076 | -0.28  | NA |
| chr1 | 214781662 | 214782556 | RP11-365D23.1 | ENSG00000250536 | 74    | 0.95 | 0.98 | 0.076 | -0.035 | NA |
| chr1 | 247170868 | 247171434 | ZNF695        | ENSG00000197472 | 150   | 0.25 | 0.17 | 0.076 | 0.079  | NA |
| chr1 | 23670245  | 23671363  | HNRNPR        | ENSG00000125944 | -49   | 0.23 | 0.19 | 0.077 | 0.048  | NA |
| chr1 | 119870226 | 119870535 | RP5-834N19.1  | ENSG00000232650 | -419  | 0.28 | 0.12 | 0.077 | 0.16   | NA |
| chr1 | 167690978 | 167691852 | MPZL1         | ENSG00000197965 | 228   | 0.25 | 0.17 | 0.077 | 0.072  | NA |
| chr1 | 713984    | 714547    | RP11-206L10.2 | ENSG00000228327 | -259  | 0.5  | 0.1  | 0.078 | 0.4    | NA |
| chr1 | 949329    | 949851    | ISG15         | ENSG00000187608 | 787   | 0.7  | 0.94 | 0.078 | -0.24  | NA |
| chr1 | 84543146  | 84544261  | PRKACB        | ENSG00000142875 | -42   | 0.19 | 0.29 | 0.079 | -0.096 | NA |
| chr1 | 40156930  | 40158514  | HPCAL4        | ENSG00000116983 | -361  | 0.29 | 0.21 | 0.081 | 0.076  | NA |
| chr1 | 62207827  | 62208818  | INADL         | ENSG00000132849 | 173   | 0.27 | 0.21 | 0.081 | 0.068  | NA |
| chr1 | 159894329 | 159895398 | TAGLN2        | ENSG00000158710 | -522  | 0.47 | 0.35 | 0.081 | 0.12   | NA |
| chr1 | 29557220  | 29557627  | MECR          | ENSG00000116353 | -43   | 0.3  | 0.18 | 0.082 | 0.11   | NA |
| chr1 | 40598508  | 40599209  | RP11-115D7.3  | ENSG00000226745 | 424   | 0.56 | 0.36 | 0.083 | 0.2    | NA |
| chr1 | 41826680  | 41828290  | FOXO6         | ENSG00000204060 | -109  | 0.27 | 0.2  | 0.083 | 0.076  | NA |
| chr1 | 113498366 | 113499312 | SLC16A1       | ENSG00000155380 | -223  | 0.24 | 0.16 | 0.083 | 0.077  | NA |
| chr1 | 228593811 | 228594713 | TRIM11        | ENSG00000154370 | 202   | 0.3  | 0.22 | 0.083 | 0.08   | NA |
| chr1 | 28099628  | 28100031  | STX12         | ENSG00000117758 | 135   | 0.19 | 0.27 | 0.085 | -0.082 | NA |
| chr1 | 44457150  | 44457772  | CCDC24        | ENSG00000159214 | 181   | 0.29 | 0.19 | 0.085 | 0.1    | NA |
| chr1 | 32645154  | 32645814  | TXLNA         | ENSG00000084652 | 197   | 0.2  | 0.15 | 0.086 | 0.053  | NA |
| chr1 | 50489417  | 50489846  | AGBL4         | ENSG00000186094 | -59   | 0.33 | 0.2  | 0.086 | 0.14   | NA |
| chr1 | 235667089 | 235668619 | B3GALNT2      | ENSG00000162885 | -132  | 0.26 | 0.21 | 0.086 | 0.056  | NA |
| chr1 | 45476225  | 45477022  | HECTD3        | ENSG00000126107 | 378   | 0.25 | 0.19 | 0.087 | 0.058  | NA |
| chr1 | 60392272  | 60392583  | CYP2J2        | ENSG00000134716 | 0     | 0.41 | 0.08 | 0.087 | 0.33   | NA |



|      |           |           |             |                 |       |      |      |       |        |    |
|------|-----------|-----------|-------------|-----------------|-------|------|------|-------|--------|----|
| chr1 | 154933928 | 154934735 | PYGO2       | ENSG00000163348 | -107  | 0.26 | 0.17 | 0.087 | 0.092  | NA |
| chr1 | 246887264 | 246888028 | SCCPDH      | ENSG00000143653 | 297   | 0.26 | 0.16 | 0.087 | 0.11   | NA |
| chr1 | 1590073   | 1590942   | AL691432.2  | ENSG00000248333 | -1572 | 0.29 | 0.21 | 0.088 | 0.083  | NA |
| chr1 | 24104502  | 24105263  | RP5-886K2.3 | ENSG00000236810 | -105  | 0.35 | 0.23 | 0.088 | 0.13   | NA |
| chr1 | 150254365 | 150254637 | C1orf51     | ENSG00000159208 | -452  | 0.22 | 0.5  | 0.088 | -0.28  | NA |
| chr1 | 156105707 | 156106171 | LMNA        | ENSG00000160789 | 61    | 0.8  | 0.64 | 0.089 | 0.16   | NA |
| chr1 | 226186803 | 226187336 | C1orf55     | ENSG00000143751 | -46   | 0.24 | 0.32 | 0.089 | -0.076 | NA |
| chr1 | 3607096   | 3607553   | TP73        | ENSG00000078900 | 88    | 0.92 | 0.98 | 0.09  | -0.055 | NA |
| chr1 | 109102538 | 109103212 | FAM102B     | ENSG00000162636 | 164   | 0.3  | 0.43 | 0.09  | -0.13  | NA |
| chr1 | 234613936 | 234614972 | TARBP1      | ENSG00000059588 | 395   | 0.2  | 0.14 | 0.091 | 0.057  | NA |
| chr1 | 17292904  | 17293115  | CROCC       | ENSG00000058453 | 486   | 0.97 | 0.91 | 0.092 | 0.061  | NA |
| chr1 | 151881763 | 151882407 | THEM4       | ENSG00000159445 | -107  | 0.29 | 0.2  | 0.092 | 0.091  | NA |
| chr1 | 1027509   | 1027730   | C1orf159    | ENSG00000131591 | -65   | 0.89 | 1    | 0.094 | -0.11  | NA |
| chr1 | 117664180 | 117665148 | TRIM45      | ENSG00000134253 | -314  | 0.35 | 0.23 | 0.094 | 0.12   | NA |
| chr1 | 1177885   | 1178207   | FAM132A     | ENSG00000184163 | 492   | 0.84 | 0.93 | 0.096 | -0.095 | NA |
| chr1 | 222817467 | 222817671 | MIA3        | ENSG00000154305 | -76   | 0.23 | 0.44 | 0.096 | -0.21  | NA |
| chr1 | 226374035 | 226374760 | ACBD3       | ENSG00000182827 | 34    | 0.25 | 0.17 | 0.096 | 0.083  | NA |
| chr1 | 61542537  | 61542877  | NFIA        | ENSG00000162599 | -239  | 0.25 | 0.15 | 0.097 | 0.097  | NA |
| chr1 | 64239465  | 64240779  | ROR1        | ENSG00000185483 | 429   | 0.24 | 0.19 | 0.097 | 0.053  | NA |
| chr1 | 180471325 | 180472277 | ACBD6       | ENSG00000135847 | 288   | 0.22 | 0.16 | 0.098 | 0.06   | NA |
| chr1 | 65991001  | 65991811  | LEPR        | ENSG00000116678 | 34    | 0.26 | 0.2  | 0.099 | 0.064  | NA |
| chr1 | 161719414 | 161720076 | DUSP12      | ENSG00000081721 | 197   | 0.29 | 0.21 | 0.099 | 0.078  | NA |
| chr1 | 32670569  | 32671885  | IQCC        | ENSG00000160051 | -9    | 0.17 | 0.24 | 0.1   | -0.065 | NA |
| chr1 | 35325182  | 35325550  | C1orf212    | ENSG00000163866 | -48   | 0.27 | 0.18 | 0.1   | 0.089  | NA |
| chr1 | 40149431  | 40150013  | HPCAL4      | ENSG00000116983 | 553   | 0.54 | 0.62 | 0.1   | -0.075 | NA |
| chr1 | 40839215  | 40840022  | SMAP2       | ENSG00000084070 | 249   | 0.22 | 0.32 | 0.1   | -0.095 | NA |
| chr1 | 45671702  | 45672388  | ZSWIM5      | ENSG00000162415 | 183   | 0.22 | 0.15 | 0.1   | 0.067  | NA |
| chr1 | 82265998  | 82269048  | LPHN2       | ENSG00000117114 | 1441  | 0.21 | 0.25 | 0.1   | -0.042 | NA |
| chr1 | 85929940  | 85931168  | DDAH1       | ENSG00000153904 | -287  | 0.24 | 0.19 | 0.1   | 0.053  | NA |
| chr1 | 87380162  | 87381214  | HS2ST1      | ENSG00000153936 | 357   | 0.22 | 0.16 | 0.1   | 0.056  | NA |

|      |           |           |               |                 |      |      |      |      |        |    |
|------|-----------|-----------|---------------|-----------------|------|------|------|------|--------|----|
| chr1 | 113217475 | 113218097 | MOV10         | ENSG00000155363 | 208  | 0.17 | 0.25 | 0.1  | -0.075 | NA |
| chr1 | 113256885 | 113258149 | PPM1J         | ENSG00000155367 | 360  | 0.27 | 0.19 | 0.1  | 0.08   | NA |
| chr1 | 147141842 | 147142918 | ACP6          | ENSG00000162836 | -16  | 0.26 | 0.19 | 0.1  | 0.07   | NA |
| chr1 | 154975697 | 154976624 | ZBTB7B        | ENSG00000160685 | 839  | 0.17 | 0.25 | 0.1  | -0.086 | NA |
| chr1 | 170043610 | 170043997 | KIFAP3        | ENSG00000075945 | -74  | 0.18 | 0.3  | 0.1  | -0.13  | NA |
| chr1 | 183604283 | 183605333 | ARPC5         | ENSG00000162704 | 9    | 0.22 | 0.31 | 0.1  | -0.086 | NA |
| chr1 | 208041862 | 208042718 | C1orf132      | ENSG00000203709 | 205  | 0.26 | 0.18 | 0.1  | 0.08   | NA |
| chr1 | 225997646 | 225998233 | EPHX1         | ENSG00000143819 | 145  | 0.41 | 0.22 | 0.1  | 0.19   | NA |
| chr1 | 16543683  | 16544307  | ANO7L1        | ENSG00000237276 | -172 | 0.35 | 0.58 | 0.11 | -0.23  | NA |
| chr1 | 16847280  | 16847892  | RP4-798A10.4  | ENSG00000224174 | 397  | 0.88 | 0.77 | 0.11 | 0.12   | NA |
| chr1 | 17764072  | 17765811  | RCC2          | ENSG00000179051 | 116  | 0.24 | 0.18 | 0.11 | 0.057  | NA |
| chr1 | 45792419  | 45793301  | HPDL          | ENSG00000186603 | 315  | 0.31 | 0.23 | 0.11 | 0.076  | NA |
| chr1 | 68696639  | 68697628  | WLS           | ENSG00000116729 | 237  | 0.3  | 0.19 | 0.11 | 0.11   | NA |
| chr1 | 149146208 | 149146697 | U1            | ENSG00000202167 | 427  | 0.4  | 0.67 | 0.11 | -0.26  | NA |
| chr1 | 151319326 | 151319545 | RFX5          | ENSG00000143390 | -103 | 0.21 | 0.12 | 0.11 | 0.096  | NA |
| chr1 | 197170005 | 197170719 | CRB1          | ENSG00000134376 | -230 | 0.2  | 0.14 | 0.11 | 0.05   | NA |
| chr1 | 229643713 | 229644293 | NUP133        | ENSG00000069248 | 42   | 0.36 | 0.23 | 0.11 | 0.13   | NA |
| chr1 | 236511353 | 236511777 | EDARADD       | ENSG00000186197 | 3    | 0.93 | 0.85 | 0.11 | 0.088  | NA |
| chr1 | 1051178   | 1052445   | C1orf159      | ENSG00000131591 | -350 | 0.18 | 0.24 | 0.12 | -0.056 | NA |
| chr1 | 2979275   | 2980758   | RP1-163G9.1   | ENSG00000177133 | 230  | 0.27 | 0.34 | 0.12 | -0.069 | NA |
| chr1 | 3816356   | 3818084   | C1orf174      | ENSG00000198912 | -409 | 0.33 | 0.23 | 0.12 | 0.098  | NA |
| chr1 | 10719867  | 10720581  | CASZ1         | ENSG00000130940 | 1231 | 0.94 | 0.98 | 0.12 | -0.039 | NA |
| chr1 | 72748471  | 72749736  | NEGR1         | ENSG00000172260 | -686 | 0.18 | 0.12 | 0.12 | 0.06   | NA |
| chr1 | 89989810  | 89990986  | LRRC8B        | ENSG00000197147 | 3    | 0.21 | 0.16 | 0.12 | 0.055  | NA |
| chr1 | 113615591 | 113616260 | RP11-31F15.2  | ENSG00000238198 | -198 | 0.23 | 0.14 | 0.12 | 0.092  | NA |
| chr1 | 155715297 | 155715908 | RP11-243J18.3 | ENSG00000203761 | -18  | 0.27 | 0.65 | 0.12 | -0.37  | NA |
| chr1 | 159824006 | 159825011 | C1orf204      | ENSG00000188004 | 185  | 0.2  | 0.26 | 0.12 | -0.054 | NA |
| chr1 | 167408512 | 167409137 | CD247         | ENSG00000198821 | 34   | 0.21 | 0.15 | 0.12 | 0.053  | NA |
| chr1 | 169396621 | 169396869 | C1orf114      | ENSG00000117477 | -90  | 0.24 | 0.14 | 0.12 | 0.1    | NA |
| chr1 | 173793288 | 173794095 | CENPL         | ENSG00000120334 | -379 | 0.21 | 0.3  | 0.12 | -0.087 | NA |

|      |           |           |               |                 |       |      |      |      |        |    |
|------|-----------|-----------|---------------|-----------------|-------|------|------|------|--------|----|
| chr1 | 205179963 | 205180910 | DSTYK         | ENSG00000133059 | 258   | 0.16 | 0.23 | 0.12 | -0.067 | NA |
| chr1 | 217262998 | 217263214 | ESRRG         | ENSG00000196482 | -128  | 0.27 | 0.09 | 0.12 | 0.17   | NA |
| chr1 | 9599350   | 9600444   | SLC25A33      | ENSG00000171612 | 356   | 0.34 | 0.24 | 0.13 | 0.099  | NA |
| chr1 | 43282574  | 43283090  | ERMAP         | ENSG00000164010 | 37    | 0.22 | 0.15 | 0.13 | 0.07   | NA |
| chr1 | 44172668  | 44173763  | RP11-184I16.2 | ENSG00000236200 | -214  | 0.22 | 0.17 | 0.13 | 0.052  | NA |
| chr1 | 92414718  | 92414986  | BRDT          | ENSG00000137948 | -76   | 0.94 | 1    | 0.13 | -0.061 | NA |
| chr1 | 95699725  | 95700142  | RWDD3         | ENSG00000122481 | 174   | 0.44 | 0.15 | 0.13 | 0.29   | NA |
| chr1 | 155531914 | 155533280 | ASH1L         | ENSG00000116539 | -274  | 0.32 | 0.21 | 0.13 | 0.11   | NA |
| chr1 | 167599464 | 167599839 | RCSD1         | ENSG00000198771 | 165   | 0.31 | 0.22 | 0.13 | 0.088  | NA |
| chr1 | 197885060 | 197885389 | LHX9          | ENSG00000143355 | -1265 | 0.34 | 0.19 | 0.13 | 0.15   | NA |
| chr1 | 201139874 | 201140504 | TMEM9         | ENSG00000116857 | 513   | 0.24 | 0.16 | 0.13 | 0.077  | NA |
| chr1 | 202830061 | 202830923 | RP11-480I12.5 | ENSG00000214796 | 244   | 0.25 | 0.16 | 0.13 | 0.091  | NA |
| chr1 | 229406646 | 229407129 | RP5-1061H20.4 | ENSG00000177788 | -137  | 0.28 | 0.19 | 0.13 | 0.087  | NA |
| chr1 | 244614522 | 244615601 | ADSS          | ENSG00000035687 | -16   | 0.25 | 0.2  | 0.13 | 0.048  | NA |
| chr1 | 244998023 | 244999142 | FAM36A        | ENSG00000203667 | -42   | 0.31 | 0.25 | 0.13 | 0.056  | NA |
| chr1 | 858970    | 861632    | SAMD11        | ENSG00000187634 | 41    | 0.24 | 0.21 | 0.14 | 0.038  | NA |
| chr1 | 1050515   | 1050830   | C1orf159      | ENSG00000131591 | 789   | 0.37 | 0.53 | 0.14 | -0.16  | NA |
| chr1 | 2158212   | 2161173   | SKI           | ENSG00000157933 | -442  | 0.26 | 0.22 | 0.14 | 0.04   | NA |
| chr1 | 8384387   | 8384719   | SLC45A1       | ENSG00000162426 | 163   | 0.96 | 0.89 | 0.14 | 0.064  | NA |
| chr1 | 10853894  | 10856964  | CASZ1         | ENSG00000130940 | 1276  | 0.28 | 0.25 | 0.14 | 0.036  | NA |
| chr1 | 25572966  | 25574521  | C1orf63       | ENSG00000117616 | -717  | 0.23 | 0.19 | 0.14 | 0.044  | NA |
| chr1 | 26231950  | 26233624  | STMN1         | ENSG00000117632 | -807  | 0.26 | 0.19 | 0.14 | 0.063  | NA |
| chr1 | 47082016  | 47082526  | MOBKLC2       | ENSG00000142961 | -134  | 0.18 | 0.27 | 0.14 | -0.093 | NA |
| chr1 | 87169875  | 87171015  | SH3GLB1       | ENSG00000097033 | 186   | 0.27 | 0.22 | 0.14 | 0.047  | NA |
| chr1 | 90228744  | 90229173  | LRRC8C        | ENSG00000171488 | -146  | 0.27 | 0.12 | 0.14 | 0.15   | NA |
| chr1 | 93249938  | 93251096  | EVI5          | ENSG00000067208 | 6     | 0.24 | 0.17 | 0.14 | 0.068  | NA |
| chr1 | 155163434 | 155163818 | MUC1          | ENSG00000185499 | -919  | 0.27 | 0.14 | 0.14 | 0.13   | NA |
| chr1 | 156646292 | 156647260 | NES           | ENSG00000132688 | 413   | 0.17 | 0.29 | 0.14 | -0.12  | NA |
| chr1 | 165567265 | 165567530 | RP11-306I1.2  | ENSG00000236206 | -303  | 0.43 | 0.24 | 0.14 | 0.19   | NA |
| chr1 | 246670148 | 246670768 | SMYD3         | ENSG00000185420 | -12   | 0.49 | 0.31 | 0.14 | 0.17   | NA |

|      |           |           |               |                 |       |      |      |      |        |    |
|------|-----------|-----------|---------------|-----------------|-------|------|------|------|--------|----|
| chr1 | 247802738 | 247803141 | RP11-634B7.4  | ENSG00000235749 | -112  | 0.34 | 0.27 | 0.14 | 0.071  | NA |
| chr1 | 1420226   | 1420684   | ATAD3B        | ENSG00000160072 | 506   | 0.91 | 0.8  | 0.15 | 0.11   | NA |
| chr1 | 8085554   | 8086854   | ERRFI1        | ENSG00000116285 | 139   | 0.17 | 0.21 | 0.15 | -0.041 | NA |
| chr1 | 16175829  | 16176117  | RP11-169K16.9 | ENSG00000179743 | -1331 | 0.32 | 0.18 | 0.15 | 0.14   | NA |
| chr1 | 17215421  | 17216094  | RP11-108M9.5  | ENSG00000235241 | 167   | 0.28 | 0.33 | 0.15 | -0.055 | NA |
| chr1 | 31191574  | 31191960  | RP5-1166H10.2 | ENSG00000186056 | 148   | 0.18 | 0.26 | 0.15 | -0.083 | NA |
| chr1 | 38218190  | 38218977  | EPHA10        | ENSG00000183317 | -5    | 0.23 | 0.15 | 0.15 | 0.077  | NA |
| chr1 | 38273374  | 38274402  | C1orf122      | ENSG00000197982 | 469   | 0.26 | 0.2  | 0.15 | 0.055  | NA |
| chr1 | 99729982  | 99730335  | RP4-788L13.1  | ENSG00000117600 | 310   | 0.3  | 0.18 | 0.15 | 0.12   | NA |
| chr1 | 109756442 | 109757098 | SARS          | ENSG00000031698 | 230   | 0.23 | 0.17 | 0.15 | 0.056  | NA |
| chr1 | 113161591 | 113162571 | ST7L          | ENSG00000007341 | -360  | 0.28 | 0.2  | 0.15 | 0.077  | NA |
| chr1 | 145477022 | 145477479 | LIX1L         | ENSG00000152022 | 165   | 0.16 | 0.29 | 0.15 | -0.13  | NA |
| chr1 | 151031767 | 151032352 | CDC42SE1      | ENSG00000197622 | -9    | 0.24 | 0.13 | 0.15 | 0.11   | NA |
| chr1 | 202113151 | 202114143 | ARL8A         | ENSG00000143862 | 222   | 0.25 | 0.19 | 0.15 | 0.056  | NA |
| chr1 | 223567681 | 223567986 | C1orf65       | ENSG00000178395 | 1118  | 0.98 | 0.92 | 0.15 | 0.061  | NA |
| chr1 | 234349884 | 234350471 | SLC35F3       | ENSG00000183780 | 160   | 0.25 | 0.16 | 0.15 | 0.087  | NA |
| chr1 | 1676885   | 1678333   | SLC35E2       | ENSG00000215790 | -251  | 0.21 | 0.39 | 0.16 | -0.18  | NA |
| chr1 | 1850098   | 1851391   | TMEM52        | ENSG00000178821 | -508  | 0.38 | 0.32 | 0.16 | 0.063  | NA |
| chr1 | 11322258  | 11323036  | MTOR          | ENSG00000198793 | -83   | 0.3  | 0.22 | 0.16 | 0.087  | NA |
| chr1 | 43353241  | 43353442  | RP11-342M1.7  | ENSG00000233708 | 1097  | 0.96 | 0.88 | 0.16 | 0.083  | NA |
| chr1 | 54411057  | 54411943  | HSPB11        | ENSG00000081870 | -225  | 0.23 | 0.16 | 0.16 | 0.075  | NA |
| chr1 | 75596723  | 75596947  | RP11-510C10.3 | ENSG00000224149 | 1426  | 0.26 | 0.39 | 0.16 | -0.14  | NA |
| chr1 | 76540147  | 76540653  | ST6GALNAC3    | ENSG00000184005 | 11    | 0.24 | 0.42 | 0.16 | -0.18  | NA |
| chr1 | 77747314  | 77748224  | AK5           | ENSG00000154027 | 33    | 0.21 | 0.16 | 0.16 | 0.048  | NA |
| chr1 | 93645432  | 93646471  | CCDC18        | ENSG00000122483 | 475   | 0.22 | 0.18 | 0.16 | 0.047  | NA |
| chr1 | 151512661 | 151513199 | TUFT1         | ENSG00000143367 | 149   | 0.17 | 0.26 | 0.16 | -0.091 | NA |
| chr1 | 154580380 | 154580797 | ADAR          | ENSG00000160710 | 94    | 0.39 | 0.21 | 0.16 | 0.18   | NA |
| chr1 | 155830195 | 155830489 | SYT11         | ENSG00000132718 | 995   | 0.28 | 0.48 | 0.16 | -0.2   | NA |
| chr1 | 166944674 | 166945169 | ILDR2         | ENSG00000143195 | -202  | 0.37 | 0.25 | 0.16 | 0.11   | NA |
| chr1 | 171710845 | 171711607 | VAMP4         | ENSG00000117533 | -26   | 0.24 | 0.19 | 0.16 | 0.054  | NA |

|      |           |           |              |                 |      |      |      |      |        |    |
|------|-----------|-----------|--------------|-----------------|------|------|------|------|--------|----|
| chr1 | 204042245 | 204044510 | SOX13        | ENSG00000143842 | 1096 | 0.25 | 0.22 | 0.16 | 0.033  | NA |
| chr1 | 221915474 | 221916804 | DUSP10       | ENSG00000143507 | -621 | 0.24 | 0.19 | 0.16 | 0.05   | NA |
| chr1 | 240254959 | 240257063 | FMN2         | ENSG00000155816 | 831  | 0.24 | 0.2  | 0.16 | 0.041  | NA |
| chr1 | 1181756   | 1182470   | FAM132A      | ENSG00000184163 | -11  | 0.19 | 0.24 | 0.17 | -0.058 | NA |
| chr1 | 22109129  | 22110261  | USP48        | ENSG00000090686 | -259 | 0.32 | 0.24 | 0.17 | 0.077  | NA |
| chr1 | 24828865  | 24829878  | RCAN3        | ENSG00000117602 | -16  | 0.23 | 0.18 | 0.17 | 0.048  | NA |
| chr1 | 45139770  | 45140584  | TMEM53       | ENSG00000126106 | -103 | 0.39 | 0.28 | 0.17 | 0.11   | NA |
| chr1 | 64058937  | 64059913  | PGM1         | ENSG00000079739 | 478  | 0.28 | 0.22 | 0.17 | 0.062  | NA |
| chr1 | 85155605  | 85156574  | SSX2IP       | ENSG00000117155 | -102 | 0.23 | 0.19 | 0.17 | 0.044  | NA |
| chr1 | 89458034  | 89458604  | CCBL2        | ENSG00000137944 | -32  | 0.25 | 0.2  | 0.17 | 0.051  | NA |
| chr1 | 109968648 | 109969570 | PSMA5        | ENSG00000143106 | -355 | 0.22 | 0.17 | 0.17 | 0.052  | NA |
| chr1 | 146552328 | 146552577 | U1           | ENSG00000201142 | 1157 | 0.46 | 0.35 | 0.17 | 0.11   | NA |
| chr1 | 147380138 | 147380482 | GJA8         | ENSG00000121634 | 227  | 1    | 0.92 | 0.17 | 0.08   | NA |
| chr1 | 154298205 | 154298544 | ATP8B2       | ENSG00000143515 | 293  | 0.15 | 0.21 | 0.17 | -0.058 | NA |
| chr1 | 173990805 | 173991849 | RC3H1        | ENSG00000135870 | 108  | 0.25 | 0.18 | 0.17 | 0.068  | NA |
| chr1 | 201083458 | 201084567 | RP5-894H24.3 | ENSG00000232237 | 476  | 0.39 | 0.34 | 0.17 | 0.052  | NA |
| chr1 | 205781870 | 205783010 | SLC41A1      | ENSG00000133065 | -136 | 0.26 | 0.22 | 0.17 | 0.043  | NA |
| chr1 | 213123647 | 213125092 | VASH2        | ENSG00000143494 | 507  | 0.25 | 0.2  | 0.17 | 0.053  | NA |
| chr1 | 10057121  | 10058108  | RBP7         | ENSG00000162444 | 350  | 0.26 | 0.19 | 0.18 | 0.069  | NA |
| chr1 | 16939456  | 16940454  | NBPF1        | ENSG00000219481 | 74   | 0.16 | 0.13 | 0.18 | 0.028  | NA |
| chr1 | 27560705  | 27561707  | RP11-40H20.4 | ENSG00000224311 | -363 | 0.29 | 0.23 | 0.18 | 0.065  | NA |
| chr1 | 36643955  | 36644327  | MAP7D1       | ENSG00000116871 | 129  | 0.95 | 0.9  | 0.18 | 0.045  | NA |
| chr1 | 43353947  | 43354170  | RP11-342M1.7 | ENSG00000233708 | 380  | 1    | 0.93 | 0.18 | 0.075  | NA |
| chr1 | 145589135 | 145589535 | NUDT17       | ENSG00000186364 | 74   | 0.29 | 0.2  | 0.18 | 0.092  | NA |
| chr1 | 211848641 | 211849176 | NEK2         | ENSG00000117650 | -9   | 0.3  | 0.18 | 0.18 | 0.12   | NA |
| chr1 | 249120450 | 249120731 | SH3BP5L      | ENSG00000175137 | 242  | 0.23 | 0.15 | 0.18 | 0.081  | NA |
| chr1 | 6484503   | 6485327   | HES2         | ENSG00000069812 | -185 | 0.23 | 0.33 | 0.19 | -0.1   | NA |
| chr1 | 11159387  | 11160136  | RP4-635E18.6 | ENSG00000230337 | 29   | 0.21 | 0.29 | 0.19 | -0.084 | NA |
| chr1 | 32757414  | 32758034  | HDAC1        | ENSG00000116478 | 37   | 0.26 | 0.2  | 0.19 | 0.053  | NA |
| chr1 | 42383640  | 42384003  | HIVEP3       | ENSG00000127124 | 348  | 0.25 | 0.14 | 0.19 | 0.11   | NA |

|      |           |           |               |                 |      |      |      |      |        |    |
|------|-----------|-----------|---------------|-----------------|------|------|------|------|--------|----|
| chr1 | 43312258  | 43312513  | ZNF691        | ENSG00000164011 | 105  | 0.46 | 0.24 | 0.19 | 0.22   | NA |
| chr1 | 146522288 | 146522555 | RP11-325P15.1 | ENSG00000225603 | 42   | 0.91 | 0.97 | 0.19 | -0.057 | NA |
| chr1 | 151118049 | 151119373 | SEMA6C        | ENSG00000143434 | 222  | 0.2  | 0.17 | 0.19 | 0.036  | NA |
| chr1 | 153508424 | 153508840 | S100A6        | ENSG00000197956 | -165 | 0.33 | 0.2  | 0.19 | 0.13   | NA |
| chr1 | 161147061 | 161147451 | B4GALT3       | ENSG00000158850 | -46  | 0.2  | 0.33 | 0.19 | -0.13  | NA |
| chr1 | 178006830 | 178007284 | RP11-568K15.1 | ENSG00000242193 | 2    | 0.4  | 0.3  | 0.19 | 0.1    | NA |
| chr1 | 178994804 | 178995917 | FAM20B        | ENSG00000116199 | 421  | 0.25 | 0.21 | 0.19 | 0.039  | NA |
| chr1 | 197743931 | 197744788 | DENND1B       | ENSG00000213047 | -37  | 0.27 | 0.2  | 0.19 | 0.075  | NA |
| chr1 | 204485473 | 204485831 | MDM4          | ENSG00000198625 | 141  | 0.36 | 0.25 | 0.19 | 0.11   | NA |
| chr1 | 228362442 | 228362691 | IBA57         | ENSG00000181873 | 315  | 0.99 | 0.92 | 0.19 | 0.065  | NA |
| chr1 | 231175062 | 231176317 | FAM89A        | ENSG00000182118 | 303  | 0.21 | 0.26 | 0.19 | -0.044 | NA |
| chr1 | 235490338 | 235492160 | GGPS1         | ENSG00000152904 | 584  | 0.29 | 0.24 | 0.19 | 0.042  | NA |
| chr1 | 2398825   | 2399055   | PLCH2         | ENSG00000149527 | 42   | 0.71 | 0.36 | 0.2  | 0.36   | NA |
| chr1 | 12289954  | 12290585  | VPS13D        | ENSG00000048707 | 145  | 0.28 | 0.21 | 0.2  | 0.069  | NA |
| chr1 | 21766272  | 21767224  | NBPF3         | ENSG00000142794 | 127  | 0.39 | 0.45 | 0.2  | -0.068 | NA |
| chr1 | 27692412  | 27693243  | MAP3K6        | ENSG00000142733 | 510  | 0.28 | 0.23 | 0.2  | 0.047  | NA |
| chr1 | 32538205  | 32539052  | TMEM39B       | ENSG00000121775 | 125  | 0.3  | 0.24 | 0.2  | 0.064  | NA |
| chr1 | 32666231  | 32666460  | CCDC28B       | ENSG00000160050 | 111  | 0.33 | 0.22 | 0.2  | 0.1    | NA |
| chr1 | 36929414  | 36930131  | MRPS15        | ENSG00000116898 | 174  | 0.25 | 0.18 | 0.2  | 0.068  | NA |
| chr1 | 44440142  | 44441256  | ATP6V0B       | ENSG00000117410 | 540  | 0.2  | 0.16 | 0.2  | 0.045  | NA |
| chr1 | 94344507  | 94344822  | DNTTIP2       | ENSG00000067334 | 48   | 0.31 | 0.43 | 0.2  | -0.13  | NA |
| chr1 | 94712906  | 94713517  | RP11-148B18.1 | ENSG00000231363 | -253 | 0.24 | 0.17 | 0.2  | 0.065  | NA |
| chr1 | 107599205 | 107600410 | PRMT6         | ENSG00000198890 | 540  | 0.21 | 0.26 | 0.2  | -0.044 | NA |
| chr1 | 180123555 | 180124584 | QSOX1         | ENSG00000116260 | 100  | 0.2  | 0.16 | 0.2  | 0.039  | NA |
| chr1 | 206858091 | 206859651 | MAPKAPK2      | ENSG00000162889 | 582  | 0.22 | 0.18 | 0.2  | 0.041  | NA |
| chr1 | 208416489 | 208418016 | PLXNA2        | ENSG00000076356 | 394  | 0.22 | 0.19 | 0.2  | 0.037  | NA |
| chr1 | 210502133 | 210502793 | HHAT          | ENSG00000054392 | 213  | 0.28 | 0.23 | 0.2  | 0.058  | NA |
| chr1 | 228289669 | 228291184 | C1orf35       | ENSG00000143793 | 277  | 0.24 | 0.21 | 0.2  | 0.039  | NA |
| chr1 | 236849472 | 236850323 | ACTN2         | ENSG00000077522 | 143  | 0.21 | 0.17 | 0.2  | 0.042  | NA |
| chr1 | 8013993   | 8014651   | PARK7         | ENSG00000116288 | -29  | 0.22 | 0.17 | 0.21 | 0.052  | NA |

|      |           |           |               |                 |      |      |      |      |        |    |
|------|-----------|-----------|---------------|-----------------|------|------|------|------|--------|----|
| chr1 | 21058006  | 21059366  | SH2D5         | ENSG00000189410 | -602 | 0.21 | 0.17 | 0.21 | 0.033  | NA |
| chr1 | 22468912  | 22470252  | WNT4          | ENSG00000162552 | -123 | 0.21 | 0.18 | 0.21 | 0.034  | NA |
| chr1 | 35544927  | 35545303  | ZMYM1         | ENSG00000197056 | 147  | 0.32 | 0.2  | 0.21 | 0.11   | NA |
| chr1 | 45452037  | 45452444  | EIF2B3        | ENSG00000070785 | 18   | 0.23 | 0.16 | 0.21 | 0.072  | NA |
| chr1 | 47184402  | 47185083  | KIAA0494      | ENSG00000159658 | -6   | 0.22 | 0.14 | 0.21 | 0.073  | NA |
| chr1 | 53904140  | 53905247  | RP4-796B4.1   | ENSG00000236253 | 353  | 1    | 0.98 | 0.21 | 0.02   | NA |
| chr1 | 142618751 | 142619238 | AL583842.3    | ENSG00000230880 | 228  | 0.64 | 0.59 | 0.21 | 0.044  | NA |
| chr1 | 145470241 | 145470673 | POLR3GL       | ENSG00000121851 | -83  | 0.27 | 0.35 | 0.21 | -0.079 | NA |
| chr1 | 145575130 | 145576219 | PIAS3         | ENSG00000131788 | 441  | 0.19 | 0.25 | 0.21 | -0.062 | NA |
| chr1 | 165599563 | 165600574 | MGST3         | ENSG00000143198 | -30  | 0.2  | 0.13 | 0.21 | 0.068  | NA |
| chr1 | 228296787 | 228297276 | MRPL55        | ENSG00000162910 | -76  | 0.24 | 0.34 | 0.21 | -0.1   | NA |
| chr1 | 236958314 | 236959202 | MTR           | ENSG00000116984 | 177  | 0.31 | 0.25 | 0.21 | 0.054  | NA |
| chr1 | 65431455  | 65432614  | JAK1          | ENSG00000162434 | 153  | 0.22 | 0.18 | 0.22 | 0.048  | NA |
| chr1 | 155022988 | 155024332 | ADAM15        | ENSG00000143537 | 618  | 0.2  | 0.24 | 0.22 | -0.044 | NA |
| chr1 | 210111179 | 210112054 | SYT14         | ENSG00000143469 | 78   | 0.23 | 0.18 | 0.22 | 0.051  | NA |
| chr1 | 225117220 | 225117781 | DNAH14        | ENSG00000185842 | 144  | 0.19 | 0.3  | 0.22 | -0.11  | NA |
| chr1 | 233749373 | 233750314 | KCNK1         | ENSG00000135750 | 93   | 0.2  | 0.31 | 0.22 | -0.11  | NA |
| chr1 | 3688553   | 3689684   | RP1-286D6.2   | ENSG00000235169 | -234 | 0.31 | 0.26 | 0.23 | 0.052  | NA |
| chr1 | 9648586   | 9649517   | TMEM201       | ENSG00000188807 | 119  | 0.25 | 0.2  | 0.23 | 0.046  | NA |
| chr1 | 26372281  | 26373313  | SLC30A2       | ENSG00000158014 | -352 | 0.26 | 0.21 | 0.23 | 0.047  | NA |
| chr1 | 26437319  | 26438917  | PDIK1L        | ENSG00000175087 | 454  | 0.27 | 0.21 | 0.23 | 0.052  | NA |
| chr1 | 42500855  | 42501980  | HIVEP3        | ENSG00000127124 | 179  | 0.32 | 0.25 | 0.23 | 0.063  | NA |
| chr1 | 44444635  | 44445622  | B4GALT2       | ENSG00000117411 | 262  | 0.23 | 0.19 | 0.23 | 0.041  | NA |
| chr1 | 54303758  | 54304262  | TMEM48        | ENSG00000058804 | -70  | 0.2  | 0.14 | 0.23 | 0.066  | NA |
| chr1 | 55229992  | 55230369  | PARS2         | ENSG00000162396 | 7    | 0.35 | 0.27 | 0.23 | 0.08   | NA |
| chr1 | 76262536  | 76262903  | MSH4          | ENSG00000057468 | 152  | 0.98 | 0.92 | 0.23 | 0.062  | NA |
| chr1 | 115053060 | 115054264 | TRIM33        | ENSG00000197323 | 119  | 0.26 | 0.21 | 0.23 | 0.049  | NA |
| chr1 | 179198163 | 179199200 | ABL2          | ENSG00000143322 | -149 | 0.24 | 0.31 | 0.23 | -0.069 | NA |
| chr1 | 210405952 | 210407250 | SERTAD4       | ENSG00000082497 | 457  | 0.25 | 0.16 | 0.23 | 0.092  | NA |
| chr1 | 224803637 | 224805314 | RP11-100E13.1 | ENSG00000233384 | -553 | 0.26 | 0.29 | 0.23 | -0.033 | NA |

|      |           |           |            |                 |      |      |      |      |        |    |
|------|-----------|-----------|------------|-----------------|------|------|------|------|--------|----|
| chr1 | 42928797  | 42929500  | CCDC30     | ENSG00000186409 | 147  | 0.21 | 0.3  | 0.24 | -0.083 | NA |
| chr1 | 59762102  | 59762794  | FGGY       | ENSG00000172456 | -19  | 0.24 | 0.15 | 0.24 | 0.095  | NA |
| chr1 | 101491317 | 101491680 | DPH5       | ENSG00000117543 | -181 | 0.19 | 0.3  | 0.24 | -0.11  | NA |
| chr1 | 120835961 | 120839391 | FAM72B     | ENSG00000188610 | 404  | 0.27 | 0.33 | 0.24 | -0.055 | NA |
| chr1 | 146549850 | 146550075 | AL596177.1 | ENSG00000240560 | -216 | 0.6  | 0.89 | 0.24 | -0.29  | NA |
| chr1 | 153662203 | 153662439 | NPR1       | ENSG00000169418 | 864  | 0.81 | 0.91 | 0.24 | -0.099 | NA |
| chr1 | 156674858 | 156676654 | CRABP2     | ENSG00000143320 | -363 | 0.21 | 0.27 | 0.24 | -0.056 | NA |
| chr1 | 202183193 | 202183526 | LGR6       | ENSG00000133067 | 76   | 0.2  | 0.27 | 0.24 | -0.072 | NA |
| chr1 | 245316547 | 245320247 | KIF26B     | ENSG00000162849 | 110  | 0.25 | 0.22 | 0.24 | 0.03   | NA |
| chr1 | 2064628   | 2064855   | PRKCZ      | ENSG00000067606 | -336 | 0.43 | 0.18 | 0.25 | 0.25   | NA |
| chr1 | 6550083   | 6551115   | PLEKHG5    | ENSG00000171680 | 31   | 0.27 | 0.32 | 0.25 | -0.051 | NA |
| chr1 | 10270015  | 10271306  | KIF1B      | ENSG00000054523 | -104 | 0.21 | 0.18 | 0.25 | 0.031  | NA |
| chr1 | 11714217  | 11715304  | FBXO2      | ENSG00000116661 | -506 | 0.2  | 0.26 | 0.25 | -0.061 | NA |
| chr1 | 11994694  | 11994969  | PLOD1      | ENSG00000083444 | 80   | 0.22 | 0.15 | 0.25 | 0.07   | NA |
| chr1 | 53703959  | 53704642  | MAGOH      | ENSG00000162385 | -129 | 0.2  | 0.3  | 0.25 | -0.1   | NA |
| chr1 | 54518601  | 54519299  | TMEM59     | ENSG00000116209 | -85  | 0.22 | 0.12 | 0.25 | 0.099  | NA |
| chr1 | 109633188 | 109633632 | TMEM167B   | ENSG00000215717 | 53   | 0.25 | 0.18 | 0.25 | 0.067  | NA |
| chr1 | 149148145 | 149148374 | AL356957.3 | ENSG00000243493 | -264 | 0.36 | 0.5  | 0.25 | -0.14  | NA |
| chr1 | 220960016 | 220960603 | MOSC1      | ENSG00000186205 | 208  | 0.2  | 0.15 | 0.25 | 0.05   | NA |
| chr1 | 6685071   | 6685691   | THAP3      | ENSG00000041988 | 150  | 0.27 | 0.22 | 0.26 | 0.054  | NA |
| chr1 | 12123488  | 12124148  | TNFRSF8    | ENSG00000120949 | 291  | 0.27 | 0.21 | 0.26 | 0.064  | NA |
| chr1 | 16532917  | 16534580  | ARHGEF19   | ENSG00000142632 | -727 | 0.45 | 0.42 | 0.26 | 0.037  | NA |
| chr1 | 33896002  | 33896929  | PHC2       | ENSG00000134686 | -249 | 0.26 | 0.2  | 0.26 | 0.06   | NA |
| chr1 | 98386189  | 98386724  | DPYD       | ENSG00000188641 | 97   | 0.24 | 0.18 | 0.26 | 0.067  | NA |
| chr1 | 145039740 | 145040180 | PDE4DIP    | ENSG00000178104 | -189 | 0.16 | 0.1  | 0.26 | 0.066  | NA |
| chr1 | 233086191 | 233086595 | NTPCR      | ENSG00000135778 | 42   | 0.2  | 0.16 | 0.26 | 0.041  | NA |
| chr1 | 233431149 | 233431540 | PCNXL2     | ENSG00000135749 | 115  | 0.31 | 0.23 | 0.26 | 0.079  | NA |
| chr1 | 14219350  | 14219737  | C1orf196   | ENSG00000218328 | 491  | 0.24 | 0.15 | 0.27 | 0.093  | NA |
| chr1 | 17306551  | 17307363  | MFAP2      | ENSG00000117122 | 159  | 0.39 | 0.33 | 0.27 | 0.062  | NA |
| chr1 | 26324549  | 26324934  | PAFAH2     | ENSG00000158006 | -133 | 0.85 | 0.33 | 0.27 | 0.51   | NA |



|      |           |           |             |                 |       |      |      |      |        |    |
|------|-----------|-----------|-------------|-----------------|-------|------|------|------|--------|----|
| chr1 | 26606362  | 26606913  | SH3BGRL3    | ENSG00000142669 | 24    | 0.31 | 0.22 | 0.27 | 0.09   | NA |
| chr1 | 38325150  | 38325999  | MTF1        | ENSG00000188786 | -282  | 0.18 | 0.23 | 0.27 | -0.053 | NA |
| chr1 | 61519352  | 61519971  | NFIA        | ENSG00000162599 | 159   | 0.35 | 0.26 | 0.27 | 0.084  | NA |
| chr1 | 85724701  | 85725524  | C1orf52     | ENSG00000162642 | 204   | 0.35 | 0.28 | 0.27 | 0.072  | NA |
| chr1 | 91966263  | 91966999  | CDC7        | ENSG00000097046 | 227   | 0.25 | 0.18 | 0.27 | 0.07   | NA |
| chr1 | 149871079 | 149871946 | BOLA1       | ENSG00000178096 | 362   | 0.36 | 0.3  | 0.27 | 0.06   | NA |
| chr1 | 154192843 | 154193852 | C1orf43     | ENSG00000143612 | -338  | 0.2  | 0.25 | 0.27 | -0.049 | NA |
| chr1 | 155108007 | 155108611 | SLC50A1     | ENSG00000169241 | 5     | 0.23 | 0.17 | 0.27 | 0.057  | NA |
| chr1 | 242686916 | 242687476 | PLD5        | ENSG00000180287 | 624   | 0.23 | 0.33 | 0.27 | -0.1   | NA |
| chr1 | 6661776   | 6663844   | KLHL21      | ENSG00000162413 | 119   | 0.23 | 0.2  | 0.28 | 0.033  | NA |
| chr1 | 28559145  | 28559597  | DNAJC8      | ENSG00000126698 | 144   | 0.27 | 0.43 | 0.28 | -0.17  | NA |
| chr1 | 28562510  | 28562976  | ATPIF1      | ENSG00000130770 | 123   | 0.37 | 0.23 | 0.28 | 0.15   | NA |
| chr1 | 33358469  | 33359449  | HPCA        | ENSG00000121905 | -166  | 0.23 | 0.16 | 0.28 | 0.066  | NA |
| chr1 | 36038927  | 36040051  | TFAP2E      | ENSG00000116819 | 518   | 0.46 | 0.5  | 0.28 | -0.044 | NA |
| chr1 | 47696504  | 47698197  | TAL1        | ENSG00000162367 | -460  | 0.25 | 0.21 | 0.28 | 0.046  | NA |
| chr1 | 55462688  | 55463010  | BSND        | ENSG00000162399 | -1757 | 0.53 | 0.61 | 0.28 | -0.088 | NA |
| chr1 | 68962283  | 68963006  | RP4-694A7.4 | ENSG00000234264 | 285   | 0.31 | 0.23 | 0.28 | 0.082  | NA |
| chr1 | 75601998  | 75602878  | LHX8        | ENSG00000162624 | 1871  | 0.27 | 0.41 | 0.28 | -0.14  | NA |
| chr1 | 92495367  | 92495964  | EPHX4       | ENSG00000172031 | 126   | 0.2  | 0.31 | 0.28 | -0.11  | NA |
| chr1 | 100598130 | 100598754 | SASS6       | ENSG00000156876 | 2     | 0.24 | 0.32 | 0.28 | -0.078 | NA |
| chr1 | 169454558 | 169455577 | SLC19A2     | ENSG00000117479 | 79    | 0.24 | 0.19 | 0.28 | 0.052  | NA |
| chr1 | 181452706 | 181453073 | CACNA1E     | ENSG00000198216 | 173   | 0.63 | 0.45 | 0.28 | 0.18   | NA |
| chr1 | 184005359 | 184006766 | GLT25D2     | ENSG00000198756 | 549   | 0.23 | 0.19 | 0.28 | 0.046  | NA |
| chr1 | 202317657 | 202318196 | PPP1R12B    | ENSG00000077157 | 99    | 0.25 | 0.16 | 0.28 | 0.091  | NA |
| chr1 | 28879402  | 28879704  | TRNAU1AP    | ENSG00000180098 | -44   | 0.28 | 0.21 | 0.29 | 0.071  | NA |
| chr1 | 39338479  | 39339349  | MYCBP       | ENSG00000214114 | 36    | 0.22 | 0.18 | 0.29 | 0.04   | NA |
| chr1 | 77684996  | 77685252  | PIGK        | ENSG00000142892 | -13   | 0.2  | 0.13 | 0.29 | 0.07   | NA |
| chr1 | 155220082 | 155220549 | FAM189B     | ENSG00000160767 | 1284  | 0.51 | 0.44 | 0.29 | 0.065  | NA |
| chr1 | 160312928 | 160313338 | COPA        | ENSG00000122218 | -95   | 0.23 | 0.17 | 0.29 | 0.059  | NA |
| chr1 | 166134258 | 166136448 | RP11-9L18.3 | ENSG00000230898 | -1021 | 0.21 | 0.24 | 0.29 | -0.03  | NA |

|      |           |           |               |                 |      |      |      |      |        |    |
|------|-----------|-----------|---------------|-----------------|------|------|------|------|--------|----|
| chr1 | 181451311 | 181452049 | CACNA1E       | ENSG00000198216 | -767 | 0.34 | 0.28 | 0.29 | 0.063  | NA |
| chr1 | 206680236 | 206681444 | RASSF5        | ENSG00000136653 | -39  | 0.31 | 0.25 | 0.29 | 0.054  | NA |
| chr1 | 207818389 | 207818952 | CR1L          | ENSG00000197721 | 212  | 0.25 | 0.2  | 0.29 | 0.047  | NA |
| chr1 | 1189396   | 1190245   | UBE2J2        | ENSG00000160087 | 1895 | 0.93 | 0.96 | 0.3  | -0.034 | NA |
| chr1 | 1935166   | 1935452   | C1orf222      | ENSG00000142609 | -33  | 0.22 | 0.16 | 0.3  | 0.062  | NA |
| chr1 | 20208807  | 20209462  | OTUD3         | ENSG00000169914 | 128  | 0.21 | 0.13 | 0.3  | 0.088  | NA |
| chr1 | 24306363  | 24307017  | SRSF10        | ENSG00000188529 | 71   | 0.17 | 0.38 | 0.3  | -0.22  | NA |
| chr1 | 94146321  | 94147504  | BCAR3         | ENSG00000137936 | 14   | 0.28 | 0.23 | 0.3  | 0.048  | NA |
| chr1 | 100435297 | 100436070 | SLC35A3       | ENSG00000117620 | 338  | 0.19 | 0.24 | 0.3  | -0.055 | NA |
| chr1 | 112298041 | 112298992 | C1orf183      | ENSG00000197852 | -385 | 0.19 | 0.24 | 0.3  | -0.052 | NA |
| chr1 | 200880593 | 200881270 | C1orf106      | ENSG00000163362 | -156 | 0.92 | 0.96 | 0.3  | -0.041 | NA |
| chr1 | 202896204 | 202896524 | KLHL12        | ENSG00000117153 | 26   | 0.15 | 0.23 | 0.3  | -0.081 | NA |
| chr1 | 228404717 | 228405013 | OBSCN         | ENSG00000154358 | 1475 | 0.97 | 0.99 | 0.3  | -0.023 | NA |
| chr1 | 236767361 | 236767998 | HEATR1        | ENSG00000119285 | 109  | 0.22 | 0.17 | 0.3  | 0.057  | NA |
| chr1 | 990274    | 990694    | RP11-54O7.14  | ENSG00000242590 | 71   | 0.95 | 0.9  | 0.31 | 0.057  | NA |
| chr1 | 2452795   | 2453007   | PANK4         | ENSG00000157881 | -561 | 0.9  | 1    | 0.31 | -0.098 | NA |
| chr1 | 95285602  | 95286319  | RP11-86H7.1   | ENSG00000224081 | -308 | 0.18 | 0.23 | 0.31 | -0.049 | NA |
| chr1 | 156698111 | 156698916 | ISG20L2       | ENSG00000143319 | -292 | 0.21 | 0.16 | 0.31 | 0.044  | NA |
| chr1 | 157107749 | 157108645 | ETV3          | ENSG00000117036 | -70  | 0.34 | 0.27 | 0.31 | 0.076  | NA |
| chr1 | 213188519 | 213189261 | ANGEL2        | ENSG00000174606 | -70  | 0.28 | 0.23 | 0.31 | 0.057  | NA |
| chr1 | 236029587 | 236030597 | LYST          | ENSG00000143669 | 83   | 0.25 | 0.2  | 0.31 | 0.051  | NA |
| chr1 | 15250373  | 15251545  | KAZN          | ENSG00000189337 | 333  | 0.27 | 0.23 | 0.32 | 0.034  | NA |
| chr1 | 37498377  | 37500624  | GRIK3         | ENSG00000163873 | 226  | 0.23 | 0.2  | 0.32 | 0.024  | NA |
| chr1 | 43232214  | 43233359  | LEPRE1        | ENSG00000117385 | -129 | 0.22 | 0.18 | 0.32 | 0.039  | NA |
| chr1 | 44412073  | 44412804  | RP11-7O11.3   | ENSG00000237950 | -215 | 0.28 | 0.24 | 0.32 | 0.048  | NA |
| chr1 | 59612407  | 59612723  | RP11-470E16.1 | ENSG00000224609 | -166 | 0.3  | 0.37 | 0.32 | -0.065 | NA |
| chr1 | 84464223  | 84465232  | TTLL7         | ENSG00000137941 | -19  | 0.25 | 0.31 | 0.32 | -0.057 | NA |
| chr1 | 91869876  | 91870390  | HFM1          | ENSG00000162669 | 159  | 0.3  | 0.22 | 0.32 | 0.085  | NA |
| chr1 | 110527248 | 110528026 | AHCYL1        | ENSG00000168710 | 329  | 0.26 | 0.3  | 0.32 | -0.043 | NA |
| chr1 | 145713966 | 145714203 | CD160         | ENSG00000117281 | 1481 | 0.54 | 0.3  | 0.32 | 0.24   | NA |

|      |           |           |              |                 |       |      |      |      |        |    |
|------|-----------|-----------|--------------|-----------------|-------|------|------|------|--------|----|
| chr1 | 149857769 | 149859470 | HIST2H2BE    | ENSG00000184678 | -387  | 0.23 | 0.2  | 0.32 | 0.037  | NA |
| chr1 | 209848443 | 209849428 | RP1-28O10.1  | ENSG00000227591 | -343  | 0.24 | 0.12 | 0.32 | 0.12   | NA |
| chr1 | 222763021 | 222763270 | TAF1A        | ENSG00000143498 | -44   | 0.18 | 0.11 | 0.32 | 0.071  | NA |
| chr1 | 222791399 | 222792083 | MIA3         | ENSG00000154305 | 313   | 0.19 | 0.15 | 0.32 | 0.041  | NA |
| chr1 | 244080540 | 244081093 | RP11-278H7.1 | ENSG00000226828 | 112   | 0.37 | 0.26 | 0.32 | 0.11   | NA |
| chr1 | 2457241   | 2458259   | PANK4        | ENSG00000157881 | -124  | 0.25 | 0.21 | 0.33 | 0.038  | NA |
| chr1 | 32859770  | 32860348  | BSDC1        | ENSG00000160058 | -33   | 0.3  | 0.23 | 0.33 | 0.07   | NA |
| chr1 | 45987163  | 45987803  | PRDX1        | ENSG00000117450 | 43    | 0.19 | 0.24 | 0.33 | -0.047 | NA |
| chr1 | 52498452  | 52499505  | RP11-91A18.4 | ENSG00000223390 | -85   | 0.23 | 0.2  | 0.33 | 0.031  | NA |
| chr1 | 118471840 | 118472720 | GDAP2        | ENSG00000196505 | -97   | 0.15 | 0.19 | 0.33 | -0.04  | NA |
| chr1 | 155990389 | 155990780 | SSR2         | ENSG00000163479 | -4    | 0.5  | 0.23 | 0.33 | 0.27   | NA |
| chr1 | 177140120 | 177140323 | FAM5B        | ENSG00000198797 | 158   | 0.2  | 0.31 | 0.33 | -0.11  | NA |
| chr1 | 211555939 | 211556332 | C1orf97      | ENSG00000153363 | -10   | 0.23 | 0.18 | 0.33 | 0.052  | NA |
| chr1 | 1267085   | 1267286   | TAS1R3       | ENSG00000169962 | 491   | 0.41 | 1    | 0.34 | -0.59  | NA |
| chr1 | 1563674   | 1564032   | MIB2         | ENSG00000197530 | -16   | 0.91 | 0.95 | 0.34 | -0.042 | NA |
| chr1 | 6659125   | 6659505   | KLHL21       | ENSG00000162413 | 561   | 0.94 | 0.84 | 0.34 | 0.099  | NA |
| chr1 | 28919041  | 28919454  | RAB42        | ENSG00000188060 | 220   | 0.21 | 0.25 | 0.34 | -0.046 | NA |
| chr1 | 44435409  | 44436114  | DPH2         | ENSG00000132768 | 89    | 0.26 | 0.21 | 0.34 | 0.043  | NA |
| chr1 | 110282351 | 110283306 | GSTM3        | ENSG00000134202 | 95    | 0.31 | 0.38 | 0.34 | -0.078 | NA |
| chr1 | 115323075 | 115323462 | SIKE1        | ENSG00000052723 | -152  | 0.23 | 0.18 | 0.34 | 0.05   | NA |
| chr1 | 146714089 | 146715278 | CHD1L        | ENSG00000131778 | 392   | 0.27 | 0.23 | 0.34 | 0.038  | NA |
| chr1 | 154300975 | 154301528 | ATP8B2       | ENSG00000143515 | -24   | 0.32 | 0.25 | 0.34 | 0.07   | NA |
| chr1 | 167189130 | 167191361 | POU2F1       | ENSG00000143190 | 125   | 0.25 | 0.22 | 0.34 | 0.029  | NA |
| chr1 | 180601027 | 180601816 | XPR1         | ENSG00000143324 | 281   | 0.29 | 0.21 | 0.34 | 0.082  | NA |
| chr1 | 225840270 | 225841795 | ENAH         | ENSG00000154380 | -614  | 0.26 | 0.22 | 0.34 | 0.043  | NA |
| chr1 | 1334071   | 1335602   | CCNL2        | ENSG00000221978 | -500  | 0.23 | 0.2  | 0.35 | 0.027  | NA |
| chr1 | 1417285   | 1417753   | ATAD3B       | ENSG00000160072 | -1346 | 0.97 | 0.92 | 0.35 | 0.041  | NA |
| chr1 | 13881410  | 13881612  | RP4-597A16.3 | ENSG00000215909 | 15    | 0.99 | 0.96 | 0.35 | 0.029  | NA |
| chr1 | 19614998  | 19615660  | AKR7A3       | ENSG00000162482 | 415   | 0.26 | 0.32 | 0.35 | -0.06  | NA |
| chr1 | 25942661  | 25943191  | MAN1C1       | ENSG00000117643 | -1033 | 0.2  | 0.15 | 0.35 | 0.045  | NA |

|      |           |           |              |                 |       |      |      |      |        |    |
|------|-----------|-----------|--------------|-----------------|-------|------|------|------|--------|----|
| chr1 | 36348501  | 36349731  | EIF2C1       | ENSG00000092847 | 306   | 0.27 | 0.21 | 0.35 | 0.058  | NA |
| chr1 | 40723386  | 40723698  | ZMPSTE24     | ENSG00000084073 | -237  | 0.27 | 0.11 | 0.35 | 0.15   | NA |
| chr1 | 46668821  | 46669258  | C1orf190     | ENSG00000171357 | 33    | 0.37 | 0.31 | 0.35 | 0.065  | NA |
| chr1 | 55680465  | 55681708  | USP24        | ENSG00000162402 | -324  | 0.25 | 0.22 | 0.35 | 0.035  | NA |
| chr1 | 98510966  | 98511710  | RP4-672J20.2 | ENSG00000225206 | -324  | 0.33 | 0.25 | 0.35 | 0.088  | NA |
| chr1 | 150293835 | 150294140 | PRPF3        | ENSG00000117360 | 62    | 0.23 | 0.17 | 0.35 | 0.059  | NA |
| chr1 | 2451217   | 2451551   | PANK4        | ENSG00000157881 | -650  | 0.84 | 0.93 | 0.36 | -0.093 | NA |
| chr1 | 85358359  | 85359187  | LPAR3        | ENSG00000171517 | 123   | 0.22 | 0.14 | 0.36 | 0.082  | NA |
| chr1 | 94374369  | 94375467  | GCLM         | ENSG00000023909 | -438  | 0.2  | 0.17 | 0.36 | 0.036  | NA |
| chr1 | 145139472 | 145139944 | AL359758.1   | ENSG00000177144 | -139  | 0.14 | 0.07 | 0.36 | 0.066  | NA |
| chr1 | 145382416 | 145382740 | U1           | ENSG00000201558 | -179  | 0.54 | 0.3  | 0.36 | 0.24   | NA |
| chr1 | 156163672 | 156164052 | SLC25A44     | ENSG00000160785 | -18   | 0.32 | 0.21 | 0.36 | 0.11   | NA |
| chr1 | 200011400 | 200012055 | NR5A2        | ENSG00000116833 | 10    | 0.31 | 0.25 | 0.36 | 0.056  | NA |
| chr1 | 226411007 | 226411880 | MIXL1        | ENSG00000185155 | 124   | 0.21 | 0.24 | 0.36 | -0.031 | NA |
| chr1 | 243650990 | 243651529 | SDCCAG8      | ENSG00000054282 | 142   | 0.98 | 0.96 | 0.36 | 0.026  | NA |
| chr1 | 10092532  | 10093404  | UBE4B        | ENSG00000130939 | 78    | 0.23 | 0.16 | 0.37 | 0.071  | NA |
| chr1 | 10490200  | 10491072  | APITD1-CORT  | ENSG00000251503 | 195   | 0.34 | 0.27 | 0.37 | 0.067  | NA |
| chr1 | 20987516  | 20988238  | DDOST        | ENSG00000244038 | -15   | 0.16 | 0.13 | 0.37 | 0.031  | NA |
| chr1 | 63153380  | 63154349  | DOCK7        | ENSG00000116641 | 89    | 0.25 | 0.2  | 0.37 | 0.046  | NA |
| chr1 | 86046362  | 86047240  | CYR61        | ENSG00000142871 | 357   | 0.2  | 0.26 | 0.37 | -0.055 | NA |
| chr1 | 200009807 | 200010036 | NR5A2        | ENSG00000116833 | -1796 | 0.28 | 0.21 | 0.37 | 0.072  | NA |
| chr1 | 202976328 | 202977028 | TMEM183A     | ENSG00000163444 | 164   | 0.27 | 0.22 | 0.37 | 0.046  | NA |
| chr1 | 205424829 | 205426556 | RP11-576D8.4 | ENSG00000224717 | 635   | 0.24 | 0.27 | 0.37 | -0.027 | NA |
| chr1 | 212872460 | 212874048 | BATF3        | ENSG00000123685 | 73    | 0.2  | 0.18 | 0.37 | 0.019  | NA |
| chr1 | 162336876 | 162337321 | NOS1AP       | ENSG00000198929 | -4    | 1    | 0.88 | 0.38 | 0.12   | NA |
| chr1 | 44401757  | 44402423  | ARTN         | ENSG00000117407 | 611   | 0.18 | 0.22 | 0.39 | -0.045 | NA |
| chr1 | 45265534  | 45266783  | PLK3         | ENSG00000173846 | 261   | 0.21 | 0.24 | 0.39 | -0.035 | NA |
| chr1 | 45965586  | 45966049  | CCDC163P     | ENSG00000236624 | -171  | 0.39 | 0.29 | 0.39 | 0.1    | NA |
| chr1 | 147623646 | 147624656 | NBPF24       | ENSG00000203836 | 116   | 0.23 | 0.14 | 0.39 | 0.097  | NA |
| chr1 | 177133392 | 177133846 | ASTN1        | ENSG00000152092 | 200   | 0.28 | 0.23 | 0.39 | 0.059  | NA |

|      |           |           |              |                 |       |      |      |      |        |    |
|------|-----------|-----------|--------------|-----------------|-------|------|------|------|--------|----|
| chr1 | 179560751 | 179561596 | TDRD5        | ENSG00000162782 | 148   | 0.28 | 0.19 | 0.39 | 0.089  | NA |
| chr1 | 11865462  | 11866566  | MTHFR        | ENSG00000177000 | -544  | 0.27 | 0.24 | 0.4  | 0.031  | NA |
| chr1 | 23036823  | 23038362  | EPHB2        | ENSG00000133216 | 260   | 0.31 | 0.27 | 0.4  | 0.037  | NA |
| chr1 | 33546524  | 33547243  | AK2          | ENSG00000004455 | -286  | 0.21 | 0.3  | 0.4  | -0.086 | NA |
| chr1 | 87018668  | 87019254  | RP4-651E10.3 | ENSG00000224466 | 64    | 0.83 | 0.89 | 0.4  | -0.069 | NA |
| chr1 | 90308839  | 90309606  | LRRC8D       | ENSG00000171492 | 240   | 0.24 | 0.2  | 0.4  | 0.037  | NA |
| chr1 | 100678766 | 100679098 | BRI3P1       | ENSG00000225169 | 83    | 0.95 | 1    | 0.4  | -0.046 | NA |
| chr1 | 202776003 | 202777727 | KDM5B        | ENSG00000117139 | -532  | 0.23 | 0.21 | 0.4  | 0.023  | NA |
| chr1 | 202857683 | 202858394 | RABIF        | ENSG00000183155 | 225   | 0.27 | 0.21 | 0.4  | 0.06   | NA |
| chr1 | 228134422 | 228136282 | WNT9A        | ENSG00000143816 | 247   | 0.28 | 0.25 | 0.4  | 0.028  | NA |
| chr1 | 23750508  | 23751663  | TCEA3        | ENSG00000204219 | 115   | 0.23 | 0.2  | 0.41 | 0.028  | NA |
| chr1 | 27286065  | 27287101  | C1orf172     | ENSG00000175707 | 293   | 0.28 | 0.31 | 0.41 | -0.039 | NA |
| chr1 | 179262771 | 179263321 | SOAT1        | ENSG00000057252 | 121   | 0.16 | 0.13 | 0.41 | 0.033  | NA |
| chr1 | 236305534 | 236306674 | GPR137B      | ENSG00000077585 | 272   | 0.18 | 0.15 | 0.41 | 0.031  | NA |
| chr1 | 18434105  | 18434813  | IGSF21       | ENSG00000117154 | 219   | 0.18 | 0.13 | 0.42 | 0.056  | NA |
| chr1 | 25664286  | 25665398  | TMEM50A      | ENSG00000183726 | 434   | 0.26 | 0.21 | 0.42 | 0.049  | NA |
| chr1 | 27481345  | 27481742  | SLC9A1       | ENSG00000090020 | -142  | 0.57 | 0.29 | 0.42 | 0.28   | NA |
| chr1 | 64935554  | 64936614  | CACHD1       | ENSG00000158966 | -344  | 0.25 | 0.21 | 0.42 | 0.036  | NA |
| chr1 | 147826167 | 147826388 | TRNAQ51P     | ENSG00000244591 | 588   | 0.78 | 0.62 | 0.42 | 0.16   | NA |
| chr1 | 151810460 | 151811684 | C2CD4D       | ENSG00000225556 | 1961  | 0.37 | 0.41 | 0.42 | -0.037 | NA |
| chr1 | 154973250 | 154974358 | ZBTB7B       | ENSG00000160685 | -1323 | 0.29 | 0.23 | 0.42 | 0.062  | NA |
| chr1 | 156611639 | 156612447 | BCAN         | ENSG00000132692 | 310   | 0.35 | 0.28 | 0.42 | 0.061  | NA |
| chr1 | 159750416 | 159751353 | DUSP23       | ENSG00000158716 | 162   | 0.23 | 0.29 | 0.42 | -0.058 | NA |
| chr1 | 200638546 | 200639384 | RP11-92G12.3 | ENSG00000232257 | 330   | 0.24 | 0.28 | 0.42 | -0.041 | NA |
| chr1 | 15850493  | 15850699  | CASP9        | ENSG00000132906 | 91    | 0.31 | 0.23 | 0.43 | 0.081  | NA |
| chr1 | 32892428  | 32892835  | RP11-395N6.2 | ENSG00000229259 | -241  | 0.12 | 0.38 | 0.43 | -0.25  | NA |
| chr1 | 36851089  | 36851873  | STK40        | ENSG00000196182 | -4    | 0.35 | 0.26 | 0.43 | 0.088  | NA |
| chr1 | 148555640 | 148556626 | NBPF15       | ENSG00000243452 | 154   | 0.22 | 0.26 | 0.43 | -0.038 | NA |
| chr1 | 153606177 | 153606974 | S100A13      | ENSG00000189171 | -50   | 0.2  | 0.23 | 0.43 | -0.039 | NA |
| chr1 | 1259643   | 1260635   | CPSF3L       | ENSG00000127054 | -156  | 0.18 | 0.2  | 0.44 | -0.022 | NA |

|      |           |           |               |                 |       |      |      |      |        |    |
|------|-----------|-----------|---------------|-----------------|-------|------|------|------|--------|----|
| chr1 | 32479102  | 32480583  | KHDRBS1       | ENSG00000121774 | 412   | 0.24 | 0.21 | 0.44 | 0.033  | NA |
| chr1 | 43832814  | 43833073  | ELOVL1        | ENSG00000066322 | 144   | 0.46 | 0.38 | 0.44 | 0.082  | NA |
| chr1 | 84971344  | 84972491  | SPATA1        | ENSG00000122432 | -57   | 0.22 | 0.19 | 0.44 | 0.032  | NA |
| chr1 | 166808341 | 166809344 | POGK          | ENSG00000143157 | 161   | 0.15 | 0.19 | 0.44 | -0.038 | NA |
| chr1 | 202936045 | 202936252 | CYB5R1        | ENSG00000159348 | 205   | 0.2  | 0.33 | 0.44 | -0.13  | NA |
| chr1 | 233463526 | 233464414 | RP5-862P8.2   | ENSG00000143674 | 456   | 0.23 | 0.2  | 0.44 | 0.029  | NA |
| chr1 | 244013802 | 244014592 | AKT3          | ENSG00000117020 | 184   | 0.23 | 0.29 | 0.44 | -0.06  | NA |
| chr1 | 27153033  | 27153243  | ZDHHC18       | ENSG00000204160 | -63   | 0.18 | 0.14 | 0.45 | 0.038  | NA |
| chr1 | 35586331  | 35586591  | RP11-181E22.1 | ENSG00000228348 | -1162 | 0.35 | 0.42 | 0.45 | -0.075 | NA |
| chr1 | 111505881 | 111507007 | LRIF1         | ENSG00000121931 | 143   | 0.22 | 0.19 | 0.45 | 0.029  | NA |
| chr1 | 155057187 | 155058056 | EFNA3         | ENSG00000143590 | -371  | 0.19 | 0.16 | 0.45 | 0.03   | NA |
| chr1 | 162760250 | 162760722 | HSD17B7       | ENSG00000132196 | -6    | 0.38 | 0.2  | 0.45 | 0.18   | NA |
| chr1 | 214156000 | 214156851 | PROX1         | ENSG00000117707 | -99   | 0.18 | 0.22 | 0.45 | -0.046 | NA |
| chr1 | 9711780   | 9713001   | PIK3CD        | ENSG00000171608 | 600   | 0.21 | 0.18 | 0.46 | 0.029  | NA |
| chr1 | 18703295  | 18703496  | IGSF21        | ENSG00000117154 | 944   | 0.98 | 0.94 | 0.46 | 0.039  | NA |
| chr1 | 34090605  | 34090854  | CSMD2         | ENSG00000121904 | 1455  | 0.92 | 0.95 | 0.46 | -0.029 | NA |
| chr1 | 173683985 | 173684403 | KLHL20        | ENSG00000076321 | 114   | 0.2  | 0.15 | 0.46 | 0.051  | NA |
| chr1 | 205648975 | 205649903 | SLC45A3       | ENSG00000158715 | 148   | 0.21 | 0.19 | 0.46 | 0.025  | NA |
| chr1 | 222988244 | 222988561 | RP11-452F19.3 | ENSG00000228106 | 38    | 0.33 | 0.23 | 0.46 | 0.1    | NA |
| chr1 | 246952214 | 246952511 | RP11-439E19.3 | ENSG00000227953 | -34   | 0.35 | 0.3  | 0.46 | 0.048  | NA |
| chr1 | 20569455  | 20569817  | RP3-340N1.6   | ENSG00000228105 | 48    | 0.92 | 0.95 | 0.47 | -0.036 | NA |
| chr1 | 34642382  | 34643024  | C1orf94       | ENSG00000142698 | -568  | 0.37 | 0.32 | 0.47 | 0.047  | NA |
| chr1 | 40974056  | 40974786  | RP11-656D10.3 | ENSG00000238287 | -88   | 0.27 | 0.24 | 0.47 | 0.029  | NA |
| chr1 | 147782066 | 147782473 | AL592207.2    | ENSG00000239842 | -1168 | 0.26 | 0.3  | 0.47 | -0.037 | NA |
| chr1 | 149261001 | 149261249 | RP11-403I13.6 | ENSG00000242352 | -412  | 0.89 | 0.94 | 0.47 | -0.043 | NA |
| chr1 | 150551328 | 150552353 | MCL1          | ENSG00000143384 | 166   | 0.21 | 0.25 | 0.47 | -0.038 | NA |
| chr1 | 155657832 | 155659125 | YY1AP1        | ENSG00000163374 | -393  | 0.28 | 0.22 | 0.47 | 0.054  | NA |
| chr1 | 201475885 | 201476516 | CSRP1         | ENSG00000159176 | -233  | 0.24 | 0.2  | 0.47 | 0.038  | NA |
| chr1 | 201924336 | 201925053 | TIMM17A       | ENSG00000134375 | 75    | 0.22 | 0.28 | 0.47 | -0.059 | NA |
| chr1 | 213031359 | 213032119 | NCRNA00292    | ENSG00000198468 | -309  | 0.24 | 0.21 | 0.47 | 0.029  | NA |

|      |           |           |               |                 |      |      |      |      |        |    |
|------|-----------|-----------|---------------|-----------------|------|------|------|------|--------|----|
| chr1 | 226736354 | 226737412 | C1orf95       | ENSG00000203685 | 382  | 0.22 | 0.2  | 0.47 | 0.023  | NA |
| chr1 | 229761128 | 229762299 | TAF5L         | ENSG00000135801 | 4    | 0.16 | 0.14 | 0.47 | 0.018  | NA |
| chr1 | 243652413 | 243652763 | SDCCAG8       | ENSG00000054282 | 1471 | 0.93 | 1    | 0.47 | -0.073 | NA |
| chr1 | 1446878   | 1448205   | ATAD3A        | ENSG00000197785 | 10   | 0.22 | 0.19 | 0.48 | 0.027  | NA |
| chr1 | 6295528   | 6296261   | ICMT          | ENSG00000116237 | 106  | 0.2  | 0.17 | 0.48 | 0.027  | NA |
| chr1 | 7843460   | 7843693   | PER3          | ENSG00000049246 | -804 | 0.43 | 0.22 | 0.48 | 0.2    | NA |
| chr1 | 7887198   | 7887476   | RP3-467L1.4   | ENSG00000236266 | 65   | 0.9  | 0.84 | 0.48 | 0.055  | NA |
| chr1 | 27216161  | 27217045  | GPN2          | ENSG00000142751 | -16  | 0.23 | 0.18 | 0.48 | 0.045  | NA |
| chr1 | 32817198  | 32817588  | RP4-811H24.8  | ENSG00000224021 | 271  | 0.19 | 0.13 | 0.48 | 0.062  | NA |
| chr1 | 52520746  | 52521124  | TXNDC12       | ENSG00000117862 | -87  | 0.26 | 0.18 | 0.48 | 0.072  | NA |
| chr1 | 144519969 | 144521503 | AL592284.1    | ENSG00000236943 | 105  | 0.3  | 0.15 | 0.48 | 0.15   | NA |
| chr1 | 171810467 | 171811325 | DNM3          | ENSG00000197959 | 275  | 0.19 | 0.22 | 0.48 | -0.031 | NA |
| chr1 | 205473877 | 205474109 | CDK18         | ENSG00000117266 | 116  | 0.24 | 0.29 | 0.48 | -0.047 | NA |
| chr1 | 206135444 | 206138863 | FAM72A        | ENSG00000196550 | 237  | 0.31 | 0.27 | 0.48 | 0.045  | NA |
| chr1 | 2116432   | 2116801   | RP11-181G12.2 | ENSG00000182873 | -788 | 0.8  | 0.67 | 0.49 | 0.13   | NA |
| chr1 | 6500168   | 6501130   | ESPN          | ENSG00000187017 | 211  | 0.25 | 0.3  | 0.49 | -0.054 | NA |
| chr1 | 7831378   | 7831846   | VAMP3         | ENSG00000049245 | 283  | 0.12 | 0.16 | 0.49 | -0.04  | NA |
| chr1 | 28285020  | 28285304  | XKR8          | ENSG00000158156 | -811 | 1    | 0.91 | 0.49 | 0.091  | NA |
| chr1 | 86042229  | 86042935  | DDAH1         | ENSG00000153904 | -41  | 0.29 | 0.25 | 0.49 | 0.044  | NA |
| chr1 | 999678    | 999911    | RP11-465B22.3 | ENSG00000217801 | -81  | 0.33 | 0.44 | 0.5  | -0.11  | NA |
| chr1 | 1709394   | 1710582   | NADK          | ENSG00000008130 | -130 | 0.23 | 0.2  | 0.5  | 0.03   | NA |
| chr1 | 23504059  | 23504633  | LUZP1         | ENSG00000169641 | -45  | 0.3  | 0.41 | 0.5  | -0.11  | NA |
| chr1 | 24742671  | 24743039  | C1orf201      | ENSG00000001460 | -212 | 0.34 | 0.26 | 0.5  | 0.081  | NA |
| chr1 | 32208486  | 32208704  | BAI2          | ENSG00000121753 | 679  | 0.93 | 0.88 | 0.5  | 0.046  | NA |
| chr1 | 100503482 | 100504404 | HIAT1         | ENSG00000156875 | 290  | 0.23 | 0.21 | 0.5  | 0.028  | NA |
| chr1 | 120904698 | 120905076 | RP11-439A17.2 | ENSG00000213244 | 212  | 0.67 | 0.3  | 0.5  | 0.37   | NA |
| chr1 | 152487978 | 152488270 | CRCT1         | ENSG00000169509 | 1146 | 0.35 | 0.23 | 0.5  | 0.12   | NA |
| chr1 | 162467599 | 162468027 | UHMK1         | ENSG00000152332 | 180  | 0.22 | 0.19 | 0.5  | 0.036  | NA |
| chr1 | 94702690  | 94703344  | ARHGAP29      | ENSG00000137962 | 104  | 0.2  | 0.18 | 0.51 | 0.022  | NA |
| chr1 | 113008844 | 113009154 | WNT2B         | ENSG00000134245 | -164 | 0.31 | 0.5  | 0.51 | -0.19  | NA |

|      |           |           |             |                 |       |      |      |      |        |    |
|------|-----------|-----------|-------------|-----------------|-------|------|------|------|--------|----|
| chr1 | 172501910 | 172502545 | C1orf9      | ENSG00000094975 | -130  | 0.16 | 0.19 | 0.51 | -0.03  | NA |
| chr1 | 247494249 | 247495840 | ZNF496      | ENSG00000162714 | 1     | 0.18 | 0.2  | 0.51 | -0.023 | NA |
| chr1 | 844299    | 845883    | RP11-54O7.1 | ENSG00000230699 | -1724 | 0.45 | 0.48 | 0.52 | -0.033 | NA |
| chr1 | 19577884  | 19578708  | KIAA0090    | ENSG00000127463 | -293  | 0.28 | 0.32 | 0.52 | -0.042 | NA |
| chr1 | 26758492  | 26758856  | DHDDS       | ENSG00000117682 | -99   | 0.18 | 0.29 | 0.52 | -0.11  | NA |
| chr1 | 28199031  | 28199257  | C1orf38     | ENSG00000130775 | 89    | 0.16 | 0.12 | 0.52 | 0.042  | NA |
| chr1 | 47799411  | 47800426  | CMPK1       | ENSG00000162368 | 449   | 0.22 | 0.19 | 0.52 | 0.033  | NA |
| chr1 | 70385043  | 70385270  | PIN1P1      | ENSG00000229359 | 151   | 1    | 0.88 | 0.52 | 0.12   | NA |
| chr1 | 156182584 | 156183097 | PMF1        | ENSG00000160783 | 67    | 0.17 | 0.23 | 0.52 | -0.059 | NA |
| chr1 | 156261199 | 156261425 | C1orf85     | ENSG00000198715 | -15   | 0.3  | 0.21 | 0.52 | 0.089  | NA |
| chr1 | 227751409 | 227751635 | ZNF678      | ENSG00000181450 | 241   | 0.28 | 0.4  | 0.52 | -0.12  | NA |
| chr1 | 31712078  | 31712812  | NKAIN1      | ENSG00000084628 | -44   | 0.16 | 0.19 | 0.53 | -0.031 | NA |
| chr1 | 53308294  | 53309262  | ZYG11A      | ENSG00000203995 | 370   | 0.24 | 0.21 | 0.53 | 0.026  | NA |
| chr1 | 115631850 | 115632584 | TSPAN2      | ENSG00000134198 | -182  | 0.23 | 0.2  | 0.53 | 0.034  | NA |
| chr1 | 1254322   | 1254548   | CPSF3L      | ENSG00000127054 | 291   | 0.86 | 1    | 0.54 | -0.14  | NA |
| chr1 | 1821405   | 1823272   | GNB1        | ENSG00000078369 | -498  | 0.23 | 0.21 | 0.54 | 0.016  | NA |
| chr1 | 27189912  | 27190128  | SFN         | ENSG00000175793 | 316   | 1    | 0.97 | 0.54 | 0.033  | NA |
| chr1 | 28415098  | 28415312  | EYA3        | ENSG00000158161 | -97   | 0.34 | 0.28 | 0.54 | 0.059  | NA |
| chr1 | 40723796  | 40724010  | ZMPSTE24    | ENSG00000084073 | -5    | 0.44 | 0.3  | 0.54 | 0.13   | NA |
| chr1 | 41131111  | 41131378  | RIMS3       | ENSG00000117016 | -127  | 0.19 | 0.25 | 0.54 | -0.058 | NA |
| chr1 | 52831511  | 52832181  | CC2D1B      | ENSG00000154222 | -18   | 0.23 | 0.15 | 0.54 | 0.076  | NA |
| chr1 | 99469932  | 99470968  | AL161744.1  | ENSG00000117598 | -410  | 0.3  | 0.27 | 0.54 | 0.031  | NA |
| chr1 | 110036545 | 110036943 | CYB561D1    | ENSG00000174151 | 70    | 0.12 | 0.16 | 0.54 | -0.036 | NA |
| chr1 | 156052072 | 156052803 | LMNA        | ENSG00000160789 | 73    | 0.31 | 0.41 | 0.54 | -0.097 | NA |
| chr1 | 166844996 | 166845773 | TADA1       | ENSG00000152382 | 180   | 0.29 | 0.23 | 0.54 | 0.056  | NA |
| chr1 | 201951754 | 201952579 | RNPEP       | ENSG00000176393 | 386   | 0.21 | 0.17 | 0.54 | 0.036  | NA |
| chr1 | 229693772 | 229695074 | ABCB10      | ENSG00000135776 | 19    | 0.23 | 0.21 | 0.54 | 0.019  | NA |
| chr1 | 247267179 | 247267884 | ZNF669      | ENSG00000188295 | 49    | 0.29 | 0.41 | 0.54 | -0.11  | NA |
| chr1 | 6188873   | 6189120   | CHD5        | ENSG00000116254 | -394  | 0.92 | 1    | 0.55 | -0.075 | NA |
| chr1 | 11072319  | 11073245  | TARDBP      | ENSG00000120948 | 368   | 0.24 | 0.21 | 0.55 | 0.027  | NA |



|      |           |           |               |                 |      |      |      |      |        |    |
|------|-----------|-----------|---------------|-----------------|------|------|------|------|--------|----|
| chr1 | 16693621  | 16694270  | C1orf144      | ENSG00000055070 | 225  | 0.25 | 0.29 | 0.55 | -0.045 | NA |
| chr1 | 23345814  | 23346677  | KDM1A         | ENSG00000004487 | 304  | 0.28 | 0.25 | 0.55 | 0.028  | NA |
| chr1 | 28908069  | 28908799  | SNHG12        | ENSG00000197989 | -259 | 0.29 | 0.23 | 0.55 | 0.064  | NA |
| chr1 | 38941919  | 38942404  | RP11-329N22.1 | ENSG00000238063 | 1293 | 0.3  | 0.25 | 0.55 | 0.055  | NA |
| chr1 | 53163688  | 53164180  | SELRC1        | ENSG00000162377 | -194 | 0.23 | 0.27 | 0.55 | -0.039 | NA |
| chr1 | 62190647  | 62190942  | TM2D1         | ENSG00000162604 | -72  | 0.3  | 0.38 | 0.55 | -0.074 | NA |
| chr1 | 66998728  | 66999060  | SGIP1         | ENSG00000118473 | -172 | 0.24 | 0.31 | 0.55 | -0.065 | NA |
| chr1 | 100315420 | 100316009 | AGL           | ENSG00000162688 | 74   | 0.21 | 0.17 | 0.55 | 0.035  | NA |
| chr1 | 149764128 | 149764989 | RP11-196G18.3 | ENSG00000233030 | 18   | 0.17 | 0.22 | 0.55 | -0.056 | NA |
| chr1 | 170633274 | 170634178 | PRRX1         | ENSG00000116132 | 251  | 0.2  | 0.22 | 0.55 | -0.025 | NA |
| chr1 | 178062712 | 178063846 | RP11-21M7.1   | ENSG00000224687 | -544 | 0.2  | 0.23 | 0.55 | -0.026 | NA |
| chr1 | 179846879 | 179847106 | TOR1AIP2      | ENSG00000169905 | -85  | 0.33 | 0.26 | 0.55 | 0.071  | NA |
| chr1 | 224033085 | 224034263 | TP53BP2       | ENSG00000143514 | -178 | 0.21 | 0.2  | 0.55 | 0.014  | NA |
| chr1 | 224517729 | 224518193 | NVL           | ENSG00000143748 | -138 | 0.44 | 0.3  | 0.55 | 0.14   | NA |
| chr1 | 36549554  | 36549965  | TEKT2         | ENSG00000092850 | 83   | 0.23 | 0.26 | 0.56 | -0.033 | NA |
| chr1 | 40235767  | 40237190  | OXCT2         | ENSG00000198754 | 539  | 0.3  | 0.21 | 0.56 | 0.092  | NA |
| chr1 | 90098230  | 90099292  | RP5-1007M22.2 | ENSG00000231999 | -455 | 0.32 | 0.28 | 0.56 | 0.042  | NA |
| chr1 | 204120398 | 204121109 | ETNK2         | ENSG00000143845 | -197 | 0.25 | 0.31 | 0.56 | -0.055 | NA |
| chr1 | 214454096 | 214455047 | SMYD2         | ENSG00000143499 | 126  | 0.2  | 0.18 | 0.56 | 0.023  | NA |
| chr1 | 225965330 | 225965734 | SRP9          | ENSG00000143742 | 1    | 0.2  | 0.14 | 0.56 | 0.055  | NA |
| chr1 | 2144199   | 2144497   | C1orf86       | ENSG00000162585 | -189 | 0.5  | 0.23 | 0.57 | 0.27   | NA |
| chr1 | 3155160   | 3155361   | PRDM16        | ENSG00000142611 | 765  | 0.65 | 0.61 | 0.57 | 0.041  | NA |
| chr1 | 11919115  | 11919555  | NPPB          | ENSG00000120937 | -347 | 0.26 | 0.22 | 0.57 | 0.043  | NA |
| chr1 | 16269900  | 16270259  | ZBTB17        | ENSG00000116809 | -200 | 0.97 | 0.95 | 0.57 | 0.026  | NA |
| chr1 | 27648453  | 27649006  | TMEM222       | ENSG00000186501 | 78   | 0.2  | 0.24 | 0.57 | -0.038 | NA |
| chr1 | 31381538  | 31381966  | SDC3          | ENSG00000162512 | -144 | 0.19 | 0.25 | 0.57 | -0.059 | NA |
| chr1 | 41249090  | 41250161  | KCNQ4         | ENSG00000117013 | -59  | 0.24 | 0.26 | 0.57 | -0.024 | NA |
| chr1 | 236558459 | 236559336 | EDARADD       | ENSG00000186197 | 181  | 0.25 | 0.21 | 0.57 | 0.038  | NA |
| chr1 | 2066367   | 2066666   | PRKCZ         | ENSG00000067606 | 87   | 0.76 | 0.5  | 0.58 | 0.26   | NA |
| chr1 | 3662963   | 3664085   | TP73-AS1      | ENSG00000227372 | -184 | 0.34 | 0.29 | 0.58 | 0.046  | NA |

|      |           |           |               |                 |      |      |      |      |        |    |
|------|-----------|-----------|---------------|-----------------|------|------|------|------|--------|----|
| chr1 | 119543056 | 119543454 | RP4-712E4.1   | ENSG00000226172 | 760  | 0.22 | 0.26 | 0.58 | -0.041 | NA |
| chr1 | 156338758 | 156339251 | RHBG          | ENSG00000132677 | 1    | 0.25 | 0.21 | 0.58 | 0.037  | NA |
| chr1 | 186649310 | 186650081 | PTGS2         | ENSG00000073756 | -140 | 0.25 | 0.16 | 0.58 | 0.085  | NA |
| chr1 | 9294401   | 9295118   | H6PD          | ENSG00000049239 | -104 | 0.28 | 0.24 | 0.59 | 0.042  | NA |
| chr1 | 27718892  | 27719349  | GPR3          | ENSG00000181773 | -28  | 0.17 | 0.26 | 0.59 | -0.089 | NA |
| chr1 | 33502201  | 33502719  | AK2           | ENSG00000004455 | -19  | 0.56 | 0.4  | 0.59 | 0.16   | NA |
| chr1 | 53925191  | 53926228  | DMRTB1        | ENSG00000143006 | 226  | 0.97 | 0.96 | 0.59 | 0.012  | NA |
| chr1 | 110453143 | 110453889 | CSF1          | ENSG00000184371 | 289  | 0.28 | 0.23 | 0.59 | 0.045  | NA |
| chr1 | 149162389 | 149162615 | TRNAE30P      | ENSG00000242424 | -803 | 0.36 | 0.43 | 0.59 | -0.071 | NA |
| chr1 | 163291479 | 163292021 | RP11-267N12.3 | ENSG00000232995 | -256 | 0.16 | 0.2  | 0.59 | -0.034 | NA |
| chr1 | 1190522   | 1190799   | UBE2J2        | ENSG00000160087 | 1055 | 0.96 | 0.87 | 0.6  | 0.084  | NA |
| chr1 | 1631086   | 1633226   | MMP23A        | ENSG00000215914 | 787  | 0.9  | 0.5  | 0.6  | 0.4    | NA |
| chr1 | 22155300  | 22155565  | HSPG2         | ENSG00000142798 | 1774 | 0.88 | 1    | 0.6  | -0.12  | NA |
| chr1 | 40420487  | 40421366  | MFSD2A        | ENSG00000168389 | 124  | 0.24 | 0.28 | 0.6  | -0.035 | NA |
| chr1 | 101361549 | 101361808 | EXTL2         | ENSG00000162694 | -124 | 0.24 | 0.19 | 0.6  | 0.049  | NA |
| chr1 | 149379198 | 149380059 | RP5-998N21.4  | ENSG00000234571 | 18   | 0.2  | 0.47 | 0.6  | -0.27  | NA |
| chr1 | 154377670 | 154378445 | IL6R          | ENSG00000160712 | 358  | 0.19 | 0.17 | 0.6  | 0.024  | NA |
| chr1 | 38019606  | 38019823  | SNIP1         | ENSG00000163877 | 135  | 0.29 | 0.22 | 0.61 | 0.075  | NA |
| chr1 | 47779707  | 47780211  | STIL          | ENSG00000123473 | -147 | 0.2  | 0.25 | 0.61 | -0.05  | NA |
| chr1 | 115212239 | 115212985 | DENND2C       | ENSG00000175984 | 44   | 0.21 | 0.19 | 0.61 | 0.028  | NA |
| chr1 | 211380406 | 211380783 | RP11-543B16.2 | ENSG00000226986 | 13   | 1    | 0.96 | 0.61 | 0.042  | NA |
| chr1 | 212208837 | 212209364 | INTS7         | ENSG00000143493 | -238 | 0.18 | 0.14 | 0.61 | 0.041  | NA |
| chr1 | 11740828  | 11741717  | MAD2L2        | ENSG00000116670 | -104 | 0.2  | 0.18 | 0.62 | 0.02   | NA |
| chr1 | 33351686  | 33352397  | HPCA          | ENSG00000121905 | 5    | 0.26 | 0.24 | 0.62 | 0.021  | NA |
| chr1 | 46049590  | 46050582  | NASP          | ENSG00000132780 | 425  | 0.22 | 0.25 | 0.62 | -0.032 | NA |
| chr1 | 109825710 | 109826207 | PSRC1         | ENSG00000134222 | -221 | 0.14 | 0.26 | 0.62 | -0.11  | NA |
| chr1 | 117209824 | 117210621 | IGSF3         | ENSG00000143061 | 92   | 0.25 | 0.22 | 0.62 | 0.024  | NA |
| chr1 | 150206971 | 150207842 | ANP32E        | ENSG00000143401 | -380 | 0.15 | 0.13 | 0.62 | 0.021  | NA |
| chr1 | 151483573 | 151483902 | CGN           | ENSG00000143375 | -126 | 0.17 | 0.23 | 0.62 | -0.065 | NA |
| chr1 | 160040128 | 160040668 | KCNJ10        | ENSG00000177807 | -360 | 0.23 | 0.19 | 0.62 | 0.038  | NA |

|      |           |           |              |                 |       |      |      |      |        |    |
|------|-----------|-----------|--------------|-----------------|-------|------|------|------|--------|----|
| chr1 | 33721448  | 33721703  | ZNF362       | ENSG00000160094 | -571  | 0.22 | 0.27 | 0.63 | -0.043 | NA |
| chr1 | 44820657  | 44821113  | ERI3         | ENSG00000117419 | -5    | 0.2  | 0.13 | 0.63 | 0.067  | NA |
| chr1 | 224621560 | 224622106 | WDR26        | ENSG00000162923 | -118  | 0.26 | 0.23 | 0.63 | 0.038  | NA |
| chr1 | 10753773  | 10754176  | CASZ1        | ENSG00000130940 | -5    | 0.31 | 0.26 | 0.64 | 0.056  | NA |
| chr1 | 28696041  | 28696731  | PHACTR4      | ENSG00000204138 | 272   | 0.21 | 0.24 | 0.64 | -0.034 | NA |
| chr1 | 35734223  | 35734855  | ZMYM4        | ENSG00000146463 | -29   | 0.22 | 0.2  | 0.64 | 0.021  | NA |
| chr1 | 38397236  | 38397721  | INPP5B       | ENSG00000204084 | -57   | 0.2  | 0.22 | 0.64 | -0.027 | NA |
| chr1 | 85741865  | 85742535  | BCL10        | ENSG00000142867 | -61   | 0.24 | 0.21 | 0.64 | 0.032  | NA |
| chr1 | 1109314   | 1110145   | TLL10        | ENSG00000162571 | 443   | 0.36 | 0.4  | 0.65 | -0.041 | NA |
| chr1 | 35497121  | 35497587  | ZMYM6        | ENSG00000163867 | -121  | 0.17 | 0.14 | 0.65 | 0.036  | NA |
| chr1 | 67395683  | 67396483  | MIER1        | ENSG00000198160 | 157   | 0.26 | 0.23 | 0.65 | 0.03   | NA |
| chr1 | 84764108  | 84764906  | SAMD13       | ENSG00000203943 | 458   | 0.23 | 0.19 | 0.65 | 0.036  | NA |
| chr1 | 86621278  | 86622871  | COL24A1      | ENSG00000171502 | 47    | 0.41 | 0.43 | 0.65 | -0.023 | NA |
| chr1 | 150601710 | 150602201 | ENSA         | ENSG00000143420 | 23    | 0.29 | 0.17 | 0.65 | 0.12   | NA |
| chr1 | 206223537 | 206224028 | RP11-38J22.3 | ENSG00000226780 | -234  | 0.33 | 0.26 | 0.65 | 0.077  | NA |
| chr1 | 214725192 | 214725528 | PTPN14       | ENSG00000152104 | -415  | 0.3  | 0.24 | 0.65 | 0.058  | NA |
| chr1 | 227127069 | 227128430 | ADCK3        | ENSG00000163050 | -238  | 0.2  | 0.22 | 0.65 | -0.022 | NA |
| chr1 | 12290955  | 12291199  | VPS13D       | ENSG00000048707 | 953   | 0.2  | 0.24 | 0.66 | -0.037 | NA |
| chr1 | 36184248  | 36184774  | C1orf216     | ENSG00000142686 | -88   | 0.21 | 0.23 | 0.66 | -0.025 | NA |
| chr1 | 40505411  | 40506703  | CAP1         | ENSG00000131236 | 152   | 0.24 | 0.26 | 0.66 | -0.016 | NA |
| chr1 | 47690980  | 47691727  | RP1-18D14.7  | ENSG00000226252 | -116  | 0.3  | 0.26 | 0.66 | 0.039  | NA |
| chr1 | 92683438  | 92683682  | C1orf146     | ENSG00000203910 | 63    | 0.96 | 1    | 0.66 | -0.042 | NA |
| chr1 | 110752256 | 110754794 | KCNC4-AS1    | ENSG00000224965 | -916  | 0.26 | 0.25 | 0.66 | 0.011  | NA |
| chr1 | 143912736 | 143916156 | FAM72D       | ENSG00000215784 | -1303 | 0.22 | 0.25 | 0.66 | -0.03  | NA |
| chr1 | 146551476 | 146551764 | U1           | ENSG00000201142 | 325   | 0.36 | 0.22 | 0.66 | 0.13   | NA |
| chr1 | 151020162 | 151020627 | C1orf56      | ENSG00000143443 | 178   | 0.19 | 0.22 | 0.66 | -0.026 | NA |
| chr1 | 153631065 | 153631369 | SNAPIN       | ENSG00000143553 | 87    | 0.33 | 0.27 | 0.66 | 0.058  | NA |
| chr1 | 173837172 | 173837917 | ZBTB37       | ENSG00000185278 | 324   | 0.26 | 0.24 | 0.66 | 0.018  | NA |
| chr1 | 207224089 | 207224450 | YOD1         | ENSG00000180667 | 153   | 0.24 | 0.28 | 0.66 | -0.047 | NA |
| chr1 | 1141670   | 1142150   | TNFRSF18     | ENSG00000186891 | 41    | 0.24 | 0.22 | 0.67 | 0.027  | NA |

|      |           |           |               |                 |      |      |      |      |        |    |
|------|-----------|-----------|---------------|-----------------|------|------|------|------|--------|----|
| chr1 | 9969845   | 9970063   | CTNNBIP1      | ENSG00000178585 | 367  | 0.17 | 0.14 | 0.67 | 0.026  | NA |
| chr1 | 24229115  | 24229537  | RP11-4M23.2   | ENSG00000229106 | -99  | 0.2  | 0.18 | 0.67 | 0.017  | NA |
| chr1 | 26672445  | 26672650  | AIM1L         | ENSG00000176092 | 601  | 0.98 | 0.94 | 0.67 | 0.04   | NA |
| chr1 | 150488036 | 150488416 | RP11-54A4.8   | ENSG00000228126 | -7   | 0.21 | 0.24 | 0.67 | -0.027 | NA |
| chr1 | 3447449   | 3447950   | MEGF6         | ENSG00000162591 | 313  | 0.27 | 0.31 | 0.68 | -0.034 | NA |
| chr1 | 3528333   | 3528683   | MEGF6         | ENSG00000162591 | -449 | 0.27 | 0.16 | 0.68 | 0.11   | NA |
| chr1 | 32574061  | 32574318  | KPNA6         | ENSG00000025800 | 300  | 0.13 | 0.09 | 0.68 | 0.044  | NA |
| chr1 | 70876622  | 70877091  | CTH           | ENSG00000116761 | -45  | 0.31 | 0.25 | 0.68 | 0.059  | NA |
| chr1 | 77333111  | 77334534  | ST6GALNAC5    | ENSG00000117069 | 696  | 0.23 | 0.25 | 0.68 | -0.016 | NA |
| chr1 | 78956624  | 78957516  | PTGFR         | ENSG00000122420 | 313  | 0.19 | 0.22 | 0.68 | -0.022 | NA |
| chr1 | 87797368  | 87797884  | LMO4          | ENSG00000143013 | 162  | 0.29 | 0.25 | 0.68 | 0.035  | NA |
| chr1 | 108507251 | 108507841 | VAV3          | ENSG00000134215 | -71  | 0.25 | 0.23 | 0.68 | 0.025  | NA |
| chr1 | 109583855 | 109585032 | WDR47         | ENSG00000085433 | -274 | 0.25 | 0.23 | 0.68 | 0.021  | NA |
| chr1 | 117602388 | 117603270 | TTF2          | ENSG00000116830 | -96  | 0.18 | 0.29 | 0.68 | -0.11  | NA |
| chr1 | 120190377 | 120191251 | ZNF697        | ENSG00000143067 | -418 | 0.18 | 0.16 | 0.68 | 0.02   | NA |
| chr1 | 3773187   | 3774465   | CEP104        | ENSG00000116198 | -68  | 0.27 | 0.24 | 0.69 | 0.022  | NA |
| chr1 | 6639427   | 6640361   | ZBTB48        | ENSG00000204859 | -167 | 0.21 | 0.19 | 0.69 | 0.019  | NA |
| chr1 | 19811703  | 19812644  | CAPZB         | ENSG00000077549 | -194 | 0.25 | 0.23 | 0.69 | 0.024  | NA |
| chr1 | 23694690  | 23696050  | ZNF436        | ENSG00000125945 | -539 | 0.18 | 0.16 | 0.69 | 0.015  | NA |
| chr1 | 27683277  | 27683590  | MAP3K6        | ENSG00000142733 | 225  | 0.91 | 0.88 | 0.69 | 0.034  | NA |
| chr1 | 29213438  | 29214300  | EPB41         | ENSG00000159023 | 266  | 0.2  | 0.18 | 0.69 | 0.016  | NA |
| chr1 | 33005423  | 33005739  | ZBTB8A        | ENSG00000160062 | 551  | 0.21 | 0.18 | 0.69 | 0.035  | NA |
| chr1 | 42845978  | 42846988  | RIMKLA        | ENSG00000177181 | 17   | 0.19 | 0.18 | 0.69 | 0.014  | NA |
| chr1 | 32800859  | 32802229  | MARCKSL1      | ENSG00000175130 | 436  | 0.23 | 0.21 | 0.7  | 0.015  | NA |
| chr1 | 44679003  | 44679465  | DMAP1         | ENSG00000178028 | 107  | 0.2  | 0.16 | 0.7  | 0.038  | NA |
| chr1 | 78148217  | 78149418  | ZZZ3          | ENSG00000036549 | -489 | 0.18 | 0.23 | 0.7  | -0.048 | NA |
| chr1 | 144491618 | 144492007 | AL592284.1    | ENSG00000236943 | -91  | 0.3  | 1    | 0.7  | -0.7   | NA |
| chr1 | 179555401 | 179555770 | RP11-545A16.3 | ENSG00000227141 | -255 | 0.23 | 0.19 | 0.7  | 0.042  | NA |
| chr1 | 202162958 | 202163390 | LGR6          | ENSG00000133067 | 145  | 0.23 | 0.21 | 0.7  | 0.028  | NA |
| chr1 | 231762414 | 231763115 | DISC1         | ENSG00000162946 | 203  | 0.21 | 0.18 | 0.7  | 0.025  | NA |

|      |           |           |               |                 |      |      |      |      |         |    |
|------|-----------|-----------|---------------|-----------------|------|------|------|------|---------|----|
| chr1 | 14026481  | 14027200  | PRDM2         | ENSG00000116731 | 147  | 0.2  | 0.18 | 0.71 | 0.017   | NA |
| chr1 | 15573620  | 15573953  | FHAD1         | ENSG00000142621 | 18   | 0.16 | 0.21 | 0.71 | -0.044  | NA |
| chr1 | 26185472  | 26186356  | C1orf135      | ENSG00000127423 | -11  | 0.33 | 0.29 | 0.71 | 0.042   | NA |
| chr1 | 29562745  | 29565307  | PTPRU         | ENSG00000060656 | 998  | 0.24 | 0.24 | 0.71 | -0.0077 | NA |
| chr1 | 151431540 | 151432032 | POGZ          | ENSG00000143442 | -132 | 0.25 | 0.21 | 0.71 | 0.037   | NA |
| chr1 | 155904072 | 155904307 | KIAA0907      | ENSG00000132680 | -25  | 0.33 | 0.52 | 0.71 | -0.19   | NA |
| chr1 | 161110859 | 161111107 | ACA64         | ENSG00000238934 | 143  | 0.94 | 0.96 | 0.71 | -0.016  | NA |
| chr1 | 182359697 | 182361563 | GLUL          | ENSG00000135821 | -91  | 0.2  | 0.21 | 0.71 | -0.012  | NA |
| chr1 | 241682473 | 241683112 | FH            | ENSG00000091483 | -188 | 0.23 | 0.2  | 0.71 | 0.026   | NA |
| chr1 | 35450649  | 35451037  | RP11-244H3.1  | ENSG00000241014 | 71   | 0.27 | 0.18 | 0.72 | 0.091   | NA |
| chr1 | 36234924  | 36235800  | CLSPN         | ENSG00000092853 | 167  | 0.24 | 0.27 | 0.72 | -0.024  | NA |
| chr1 | 75595813  | 75596162  | LHX8          | ENSG00000162624 | 1868 | 0.27 | 0.35 | 0.72 | -0.078  | NA |
| chr1 | 85513509  | 85514555  | MCOLN3        | ENSG00000055732 | 97   | 0.22 | 0.2  | 0.72 | 0.016   | NA |
| chr1 | 114471965 | 114472899 | HIPK1         | ENSG00000163349 | 436  | 0.22 | 0.2  | 0.72 | 0.016   | NA |
| chr1 | 149982153 | 149982860 | OTUD7B        | ENSG00000163113 | 118  | 0.19 | 0.15 | 0.72 | 0.04    | NA |
| chr1 | 155224624 | 155225655 | FAM189B       | ENSG00000160767 | -440 | 0.18 | 0.2  | 0.72 | -0.019  | NA |
| chr1 | 176175711 | 176176811 | RFWD2         | ENSG00000143207 | -434 | 0.21 | 0.22 | 0.72 | -0.017  | NA |
| chr1 | 183774193 | 183774416 | RGL1          | ENSG00000143344 | 50   | 0.4  | 0.27 | 0.72 | 0.13    | NA |
| chr1 | 192777632 | 192778198 | RGS2          | ENSG00000116741 | -254 | 0.21 | 0.19 | 0.72 | 0.024   | NA |
| chr1 | 205197632 | 205197959 | TMCC2         | ENSG00000133069 | -264 | 0.23 | 0.28 | 0.72 | -0.055  | NA |
| chr1 | 224622597 | 224622818 | CNIH3         | ENSG00000143786 | 93   | 0.23 | 0.2  | 0.72 | 0.028   | NA |
| chr1 | 982152    | 982511    | AGRN          | ENSG00000188157 | -250 | 0.99 | 0.98 | 0.73 | 0.014   | NA |
| chr1 | 984206    | 984429    | AGRN          | ENSG00000188157 | 408  | 0.86 | 0.89 | 0.73 | -0.032  | NA |
| chr1 | 9749295   | 9750228   | PIK3CD        | ENSG00000171608 | 1527 | 0.23 | 0.21 | 0.73 | 0.018   | NA |
| chr1 | 38157295  | 38158586  | C1orf109      | ENSG00000116922 | -63  | 0.29 | 0.24 | 0.73 | 0.044   | NA |
| chr1 | 89149594  | 89150658  | PKN2          | ENSG00000065243 | 221  | 0.19 | 0.21 | 0.73 | -0.017  | NA |
| chr1 | 113741473 | 113741745 | RP11-389O22.5 | ENSG00000236887 | 162  | 0.97 | 0.99 | 0.73 | -0.015  | NA |
| chr1 | 150946496 | 150947950 | LASS2         | ENSG00000143418 | -312 | 0.24 | 0.22 | 0.73 | 0.014   | NA |
| chr1 | 223899990 | 223900823 | CAPN2         | ENSG00000162909 | 372  | 0.19 | 0.17 | 0.73 | 0.013   | NA |
| chr1 | 240986654 | 240986909 | RFKP1         | ENSG00000215802 | -48  | 1    | 0.97 | 0.73 | 0.031   | NA |

|      |           |           |              |                 |      |      |      |      |        |    |
|------|-----------|-----------|--------------|-----------------|------|------|------|------|--------|----|
| chr1 | 2449922   | 2450206   | PANK4        | ENSG00000157881 | 670  | 0.94 | 0.91 | 0.74 | 0.031  | NA |
| chr1 | 21043832  | 21044771  | KIF17        | ENSG00000117245 | -317 | 0.25 | 0.24 | 0.74 | 0.015  | NA |
| chr1 | 22149683  | 22149897  | HSPG2        | ENSG00000142798 | 969  | 0.96 | 0.93 | 0.74 | 0.022  | NA |
| chr1 | 28240584  | 28241535  | RPA2         | ENSG00000117748 | -35  | 0.37 | 0.3  | 0.74 | 0.073  | NA |
| chr1 | 51796097  | 51796589  | TTC39A       | ENSG00000085831 | -111 | 0.15 | 0.18 | 0.74 | -0.03  | NA |
| chr1 | 95582750  | 95583572  | TMEM56       | ENSG00000152078 | 267  | 0.29 | 0.27 | 0.74 | 0.023  | NA |
| chr1 | 100817709 | 100818899 | CDC14A       | ENSG00000079335 | 281  | 0.24 | 0.21 | 0.74 | 0.022  | NA |
| chr1 | 160370112 | 160370658 | VANGL2       | ENSG00000162738 | 9    | 0.2  | 0.18 | 0.74 | 0.019  | NA |
| chr1 | 196577708 | 196578011 | KCNT2        | ENSG00000162687 | -318 | 0.16 | 0.2  | 0.74 | -0.044 | NA |
| chr1 | 214776256 | 214776935 | CENPF        | ENSG00000117724 | 57   | 0.26 | 0.21 | 0.74 | 0.045  | NA |
| chr1 | 43637503  | 43638052  | WDR65        | ENSG00000243710 | -43  | 0.25 | 0.22 | 0.75 | 0.034  | NA |
| chr1 | 43855375  | 43855921  | MED8         | ENSG00000159479 | -193 | 0.25 | 0.22 | 0.75 | 0.026  | NA |
| chr1 | 55505060  | 55506015  | PCSK9        | ENSG00000169174 | 316  | 0.46 | 0.44 | 0.75 | 0.02   | NA |
| chr1 | 111746337 | 111747303 | DENND2D      | ENSG00000162777 | 104  | 0.27 | 0.3  | 0.75 | -0.023 | NA |
| chr1 | 200116696 | 200117204 | RP11-47A17.2 | ENSG00000229220 | 457  | 0.99 | 0.99 | 0.75 | 0.0083 | NA |
| chr1 | 203097233 | 203097496 | ADORA1       | ENSG00000163485 | -70  | 0.21 | 0.17 | 0.75 | 0.039  | NA |
| chr1 | 214160798 | 214161034 | PROX1        | ENSG00000117707 | -364 | 0.27 | 0.23 | 0.75 | 0.038  | NA |
| chr1 | 236304758 | 236305025 | GPR137B      | ENSG00000077585 | -941 | 0.21 | 0.26 | 0.75 | -0.044 | NA |
| chr1 | 906296    | 906538    | PLEKHN1      | ENSG00000187583 | 162  | 0.26 | 0.23 | 0.76 | 0.028  | NA |
| chr1 | 16070628  | 16070853  | TMEM82       | ENSG00000162460 | 1698 | 0.7  | 1    | 0.76 | -0.3   | NA |
| chr1 | 20834416  | 20834883  | MUL1         | ENSG00000090432 | 5    | 0.22 | 0.2  | 0.76 | 0.027  | NA |
| chr1 | 147999931 | 148000778 | RP3-328E19.4 | ENSG00000223491 | 141  | 0.29 | 0.35 | 0.76 | -0.062 | NA |
| chr1 | 156215368 | 156215899 | PAQR6        | ENSG00000160781 | 52   | 0.24 | 0.22 | 0.76 | 0.02   | NA |
| chr1 | 159141202 | 159141718 | CADM3        | ENSG00000162706 | 61   | 0.16 | 0.2  | 0.76 | -0.041 | NA |
| chr1 | 185285329 | 185286735 | IVNS1ABP     | ENSG00000116679 | 373  | 0.16 | 0.17 | 0.76 | -0.015 | NA |
| chr1 | 6086244   | 6086494   | KCNAB2       | ENSG00000069424 | 9    | 0.78 | 0.89 | 0.77 | -0.11  | NA |
| chr1 | 38061428  | 38061740  | GNL2         | ENSG00000134697 | -62  | 0.33 | 0.14 | 0.77 | 0.19   | NA |
| chr1 | 47489226  | 47489633  | CYP4X1       | ENSG00000186377 | 189  | 0.26 | 0.3  | 0.77 | -0.04  | NA |
| chr1 | 97187102  | 97187606  | PTBP2        | ENSG00000117569 | 133  | 0.29 | 0.26 | 0.77 | 0.025  | NA |
| chr1 | 118147958 | 118149670 | AL157902.3   | ENSG00000236866 | -507 | 0.32 | 0.3  | 0.77 | 0.019  | NA |

|      |           |           |              |                 |       |      |      |      |         |    |
|------|-----------|-----------|--------------|-----------------|-------|------|------|------|---------|----|
| chr1 | 214162508 | 214162737 | PROX1        | ENSG00000117707 | 762   | 0.33 | 0.3  | 0.77 | 0.033   | NA |
| chr1 | 228645196 | 228646434 | HIST3H2A     | ENSG00000181218 | -255  | 0.24 | 0.23 | 0.77 | 0.016   | NA |
| chr1 | 244624501 | 244624920 | C1orf101     | ENSG00000179397 | 37    | 0.24 | 0.22 | 0.77 | 0.022   | NA |
| chr1 | 27226492  | 27227009  | NUDC         | ENSG00000090273 | 21    | 0.22 | 0.18 | 0.78 | 0.036   | NA |
| chr1 | 40997160  | 40997439  | ZNF684       | ENSG00000117010 | 66    | 0.17 | 0.19 | 0.78 | -0.018  | NA |
| chr1 | 92350913  | 92352085  | TGFBR3       | ENSG00000069702 | -10   | 0.27 | 0.26 | 0.78 | 0.01    | NA |
| chr1 | 108742400 | 108743201 | SLC25A24     | ENSG00000085491 | 98    | 0.23 | 0.28 | 0.78 | -0.045  | NA |
| chr1 | 153747655 | 153748698 | SLC27A3      | ENSG00000143554 | 408   | 0.23 | 0.22 | 0.78 | 0.017   | NA |
| chr1 | 167522469 | 167523070 | CREG1        | ENSG00000143162 | 235   | 0.22 | 0.24 | 0.78 | -0.015  | NA |
| chr1 | 1600981   | 1601231   | SLC35E2B     | ENSG00000189339 | 472   | 0.94 | 0.97 | 0.79 | -0.028  | NA |
| chr1 | 2527239   | 2527503   | MMEL1        | ENSG00000142606 | -1859 | 0.71 | 0.82 | 0.79 | -0.1    | NA |
| chr1 | 22213902  | 22214119  | HSPG2        | ENSG00000142798 | 1204  | 0.94 | 0.96 | 0.79 | -0.021  | NA |
| chr1 | 31885794  | 31887010  | SERINC2      | ENSG00000168528 | 439   | 0.23 | 0.24 | 0.79 | -0.012  | NA |
| chr1 | 92545819  | 92546480  | BTBD8        | ENSG00000189195 | 287   | 0.15 | 0.18 | 0.79 | -0.024  | NA |
| chr1 | 165667544 | 165667817 | ALDH9A1      | ENSG00000143149 | -135  | 0.32 | 0.39 | 0.79 | -0.068  | NA |
| chr1 | 183440351 | 183442255 | RP11-74N20.1 | ENSG00000232860 | -439  | 0.22 | 0.21 | 0.79 | 0.012   | NA |
| chr1 | 204950982 | 204951210 | NFASC        | ENSG00000163531 | 112   | 1    | 0.92 | 0.79 | 0.075   | NA |
| chr1 | 207842805 | 207843259 | CR1L         | ENSG00000197721 | 248   | 0.27 | 0.3  | 0.79 | -0.022  | NA |
| chr1 | 237205126 | 237206644 | RYR2         | ENSG00000198626 | 380   | 0.19 | 0.18 | 0.79 | 0.0095  | NA |
| chr1 | 762416    | 763445    | NCRNA00115   | ENSG00000225880 | -44   | 0.23 | 0.21 | 0.8  | 0.024   | NA |
| chr1 | 16173889  | 16175396  | SPEN         | ENSG00000065526 | 283   | 0.23 | 0.24 | 0.8  | -0.0094 | NA |
| chr1 | 18435566  | 18435904  | IGSF21       | ENSG00000117154 | 1495  | 0.31 | 0.27 | 0.8  | 0.037   | NA |
| chr1 | 67390468  | 67391109  | WDR78        | ENSG00000152763 | -286  | 0.22 | 0.19 | 0.8  | 0.022   | NA |
| chr1 | 154540233 | 154540573 | CHRNA2       | ENSG00000160716 | 146   | 0.26 | 0.24 | 0.8  | 0.022   | NA |
| chr1 | 1322644   | 1322924   | CCNL2        | ENSG00000221978 | 1309  | 0.93 | 0.94 | 0.81 | -0.013  | NA |
| chr1 | 16011266  | 16011502  | PLEKHM2      | ENSG00000116786 | 348   | 0.33 | 0.24 | 0.81 | 0.089   | NA |
| chr1 | 40781004  | 40781445  | COL9A2       | ENSG00000049089 | -114  | 0.27 | 0.25 | 0.81 | 0.028   | NA |
| chr1 | 42921716  | 42922575  | PPCS         | ENSG00000127125 | 357   | 0.2  | 0.21 | 0.81 | -0.013  | NA |
| chr1 | 59012326  | 59012577  | OMA1         | ENSG00000162600 | -73   | 0.14 | 0.18 | 0.81 | -0.035  | NA |
| chr1 | 153650830 | 153652375 | NPR1         | ENSG00000169418 | 489   | 0.19 | 0.18 | 0.81 | 0.011   | NA |

|      |           |           |              |                 |      |      |      |      |         |    |
|------|-----------|-----------|--------------|-----------------|------|------|------|------|---------|----|
| chr1 | 1019818   | 1020026   | C1orf159     | ENSG00000131591 | -470 | 0.93 | 0.95 | 0.82 | -0.015  | NA |
| chr1 | 15853108  | 15853663  | DNAJC16      | ENSG00000116138 | 77   | 0.21 | 0.22 | 0.82 | -0.014  | NA |
| chr1 | 62901651  | 62903667  | USP1         | ENSG00000162607 | 691  | 0.2  | 0.2  | 0.82 | 0.006   | NA |
| chr1 | 92001023  | 92001444  | RP11-47K11.2 | ENSG00000241318 | -70  | 1    | 0.98 | 0.82 | 0.023   | NA |
| chr1 | 117112960 | 117113883 | CD58         | ENSG00000116815 | 185  | 0.18 | 0.17 | 0.82 | 0.011   | NA |
| chr1 | 174968490 | 174969624 | CACYBP       | ENSG00000116161 | 486  | 0.25 | 0.27 | 0.82 | -0.016  | NA |
| chr1 | 2333550   | 2334172   | RER1         | ENSG00000157916 | 471  | 0.97 | 0.96 | 0.83 | 0.012   | NA |
| chr1 | 8877012   | 8877283   | RERE         | ENSG00000142599 | 377  | 0.22 | 0.12 | 0.83 | 0.099   | NA |
| chr1 | 29063066  | 29064315  | YTHDF2       | ENSG00000198492 | 557  | 0.2  | 0.19 | 0.83 | 0.01    | NA |
| chr1 | 33116543  | 33117363  | RBBP4        | ENSG00000162521 | 210  | 0.2  | 0.18 | 0.83 | 0.029   | NA |
| chr1 | 40348941  | 40349288  | TRIT1        | ENSG00000043514 | -8   | 0.2  | 0.19 | 0.83 | 0.015   | NA |
| chr1 | 204654132 | 204654885 | LRRN2        | ENSG00000170382 | -27  | 0.23 | 0.25 | 0.83 | -0.012  | NA |
| chr1 | 215740507 | 215741266 | KCTD3        | ENSG00000136636 | 151  | 0.2  | 0.18 | 0.83 | 0.021   | NA |
| chr1 | 25944099  | 25944772  | MAN1C1       | ENSG00000117643 | 94   | 0.36 | 0.38 | 0.84 | -0.023  | NA |
| chr1 | 84944932  | 84945350  | RPF1         | ENSG00000117133 | 199  | 0.28 | 0.22 | 0.84 | 0.059   | NA |
| chr1 | 152161321 | 152161928 | RP1-14N1.2   | ENSG00000237975 | -203 | 0.28 | 0.29 | 0.84 | -0.014  | NA |
| chr1 | 165323486 | 165323811 | LMX1A        | ENSG00000162761 | 1335 | 1    | 0.39 | 0.84 | 0.61    | NA |
| chr1 | 193028221 | 193029271 | UCHL5        | ENSG00000116750 | -399 | 0.16 | 0.17 | 0.84 | -0.0074 | NA |
| chr1 | 201123245 | 201123746 | TMEM9        | ENSG00000116857 | 51   | 0.33 | 0.29 | 0.84 | 0.036   | NA |
| chr1 | 242011151 | 242011744 | EXO1         | ENSG00000174371 | 178  | 0.28 | 0.31 | 0.84 | -0.025  | NA |
| chr1 | 1362954   | 1363299   | RP4-758J18.8 | ENSG00000230270 | 53   | 0.33 | 0.36 | 0.85 | -0.026  | NA |
| chr1 | 38156042  | 38156279  | C1orf109     | ENSG00000116922 | -6   | 0.19 | 0.33 | 0.85 | -0.14   | NA |
| chr1 | 39456655  | 39457271  | AKIRIN1      | ENSG00000174574 | 68   | 0.2  | 0.21 | 0.85 | -0.011  | NA |
| chr1 | 43123977  | 43124422  | PPIH         | ENSG00000171960 | 103  | 0.33 | 0.26 | 0.85 | 0.072   | NA |
| chr1 | 46598126  | 46599129  | PIK3R3       | ENSG00000117461 | -339 | 0.25 | 0.26 | 0.85 | -0.012  | NA |
| chr1 | 148605087 | 148605420 | U1           | ENSG00000207205 | -181 | 0.94 | 0.88 | 0.85 | 0.062   | NA |
| chr1 | 149398825 | 149399250 | RP5-998N21.5 | ENSG00000240929 | 142  | 0.38 | 1    | 0.85 | -0.62   | NA |
| chr1 | 151170847 | 151171532 | PIP5K1A      | ENSG00000143398 | 162  | 0.15 | 0.16 | 0.85 | -0.016  | NA |
| chr1 | 223566642 | 223567268 | C1orf65      | ENSG00000178395 | 240  | 0.26 | 0.25 | 0.85 | 0.013   | NA |
| chr1 | 228742996 | 228743461 | 5S_rRNA      | ENSG00000202056 | -266 | 0.63 | 0.64 | 0.85 | -0.011  | NA |



|      |           |           |         |                 |       |      |      |      |         |    |
|------|-----------|-----------|---------|-----------------|-------|------|------|------|---------|----|
| chr1 | 231473012 | 231474382 | EXOC8   | ENSG00000116903 | -119  | 0.22 | 0.22 | 0.85 | 0.0072  | NA |
| chr1 | 45251962  | 45252292  | BEST4   | ENSG00000142959 | 1250  | 0.25 | 0.14 | 0.86 | 0.11    | NA |
| chr1 | 48937304  | 48937683  | SPATA6  | ENSG00000132122 | 189   | 0.26 | 0.28 | 0.86 | -0.018  | NA |
| chr1 | 70032967  | 70034495  | LRRC7   | ENSG00000033122 | -350  | 0.27 | 0.25 | 0.86 | 0.025   | NA |
| chr1 | 110162464 | 110162716 | AMPD2   | ENSG00000116337 | 122   | 0.35 | 0.29 | 0.86 | 0.062   | NA |
| chr1 | 158150620 | 158151503 | CD1D    | ENSG00000158473 | 1324  | 0.25 | 0.24 | 0.86 | 0.011   | NA |
| chr1 | 207494543 | 207495364 | CD55    | ENSG00000196352 | 100   | 0.29 | 0.26 | 0.86 | 0.025   | NA |
| chr1 | 207925171 | 207925964 | CD46    | ENSG00000117335 | 165   | 0.35 | 0.32 | 0.86 | 0.027   | NA |
| chr1 | 66258440  | 66258918  | PDE4B   | ENSG00000184588 | -185  | 0.29 | 0.26 | 0.87 | 0.027   | NA |
| chr1 | 954768    | 956343    | AGRN    | ENSG00000188157 | 52    | 0.22 | 0.22 | 0.88 | -0.0094 | NA |
| chr1 | 23809977  | 23810693  | ASAP3   | ENSG00000088280 | 336   | 0.23 | 0.22 | 0.88 | 0.011   | NA |
| chr1 | 28655365  | 28655667  | MED18   | ENSG00000130772 | 3     | 0.25 | 0.24 | 0.88 | 0.014   | NA |
| chr1 | 28969553  | 28969898  | TAF12   | ENSG00000120656 | -147  | 0.36 | 0.32 | 0.88 | 0.043   | NA |
| chr1 | 67773329  | 67773767  | IL12RB2 | ENSG00000081985 | -8    | 0.26 | 0.25 | 0.88 | 0.011   | NA |
| chr1 | 149224358 | 149224642 | RNU1-5  | ENSG00000206737 | -279  | 0.17 | 0.22 | 0.88 | -0.048  | NA |
| chr1 | 154946742 | 154947486 | SHC1    | ENSG00000160691 | -302  | 0.24 | 0.18 | 0.88 | 0.055   | NA |
| chr1 | 193074174 | 193074778 | GLRX2   | ENSG00000023572 | 85    | 0.4  | 0.42 | 0.88 | -0.028  | NA |
| chr1 | 5937157   | 5937392   | NPHP4   | ENSG00000131697 | 252   | 0.88 | 0.9  | 0.89 | -0.022  | NA |
| chr1 | 17380456  | 17380722  | SDHB    | ENSG00000117118 | -87   | 0.19 | 0.17 | 0.89 | 0.018   | NA |
| chr1 | 55352463  | 55353328  | DHCR24  | ENSG00000116133 | -414  | 0.26 | 0.25 | 0.89 | 0.0099  | NA |
| chr1 | 110692988 | 110694264 | SLC6A17 | ENSG00000197106 | 518   | 0.19 | 0.18 | 0.89 | 0.0076  | NA |
| chr1 | 113249342 | 113250198 | RHOC    | ENSG00000155366 | -92   | 0.27 | 0.26 | 0.89 | 0.0097  | NA |
| chr1 | 201617041 | 201619788 | NAV1    | ENSG00000134369 | 1037  | 0.23 | 0.23 | 0.89 | 0.0066  | NA |
| chr1 | 213224611 | 213224867 | RPS6KC1 | ENSG00000136643 | 135   | 0.21 | 0.27 | 0.89 | -0.053  | NA |
| chr1 | 1457954   | 1459029   | ATAD3A  | ENSG00000197785 | -1162 | 0.96 | 0.95 | 0.9  | 0.0063  | NA |
| chr1 | 27248048  | 27248619  | NUDC    | ENSG00000090273 | 116   | 0.17 | 0.16 | 0.9  | 0.0068  | NA |
| chr1 | 70687300  | 70687560  | SRSF11  | ENSG00000116754 | 23    | 0.44 | 0.4  | 0.9  | 0.036   | NA |
| chr1 | 85463884  | 85464167  | WDR63   | ENSG00000162643 | -805  | 0.25 | 0.23 | 0.9  | 0.024   | NA |
| chr1 | 204226544 | 204226908 | PLEKHA6 | ENSG00000143850 | -119  | 0.67 | 0.73 | 0.9  | -0.06   | NA |
| chr1 | 31380844  | 31381078  | SDC3    | ENSG00000162512 | 647   | 0.31 | 0.27 | 0.91 | 0.04    | NA |

|      |           |           |             |                 |       |      |      |      |         |    |
|------|-----------|-----------|-------------|-----------------|-------|------|------|------|---------|----|
| chr1 | 47069615  | 47070179  | MKNK1       | ENSG00000079277 | -11   | 0.23 | 0.24 | 0.91 | -0.012  | NA |
| chr1 | 55007704  | 55008448  | ACOT11      | ENSG00000162390 | 146   | 0.22 | 0.21 | 0.91 | 0.011   | NA |
| chr1 | 149286812 | 149287773 | AL356957.2  | ENSG00000241802 | 138   | 0.21 | 0.22 | 0.91 | -0.011  | NA |
| chr1 | 156469617 | 156471060 | MEF2D       | ENSG00000116604 | 191   | 0.26 | 0.27 | 0.91 | -0.013  | NA |
| chr1 | 202678881 | 202679769 | SYT2        | ENSG00000143858 | 220   | 0.31 | 0.32 | 0.91 | -0.016  | NA |
| chr1 | 242687922 | 242688682 | PLD5        | ENSG00000180287 | -329  | 0.2  | 0.21 | 0.91 | -0.0088 | NA |
| chr1 | 15929823  | 15930289  | RP4-680D5.2 | ENSG00000237301 | 65    | 0.2  | 0.19 | 0.92 | 0.019   | NA |
| chr1 | 20126029  | 20126780  | TMCO4       | ENSG00000162542 | 6     | 0.21 | 0.2  | 0.92 | 0.014   | NA |
| chr1 | 34628783  | 34630976  | CSMD2       | ENSG00000121904 | 996   | 0.21 | 0.22 | 0.92 | -0.0083 | NA |
| chr1 | 43824134  | 43825059  | RP1-92O14.3 | ENSG00000234694 | -267  | 0.29 | 0.28 | 0.92 | 0.0083  | NA |
| chr1 | 153949712 | 153950525 | JTB         | ENSG00000143543 | -248  | 0.22 | 0.2  | 0.92 | 0.019   | NA |
| chr1 | 220863507 | 220864249 | C1orf115    | ENSG00000162817 | 691   | 0.21 | 0.2  | 0.92 | 0.01    | NA |
| chr1 | 8385895   | 8386168   | SLC45A1     | ENSG00000162426 | 1641  | 0.98 | 0.96 | 0.93 | 0.015   | NA |
| chr1 | 28857037  | 28857311  | RCC1        | ENSG00000180198 | -1273 | 0.96 | 0.95 | 0.93 | 0.012   | NA |
| chr1 | 35258564  | 35258791  | GJA4        | ENSG00000187513 | 78    | 0.34 | 0.38 | 0.93 | -0.038  | NA |
| chr1 | 85462585  | 85463435  | MCOLN2      | ENSG00000153898 | -387  | 0.47 | 0.46 | 0.93 | 0.013   | NA |
| chr1 | 151372014 | 151372582 | PSMB4       | ENSG00000159377 | 262   | 0.24 | 0.22 | 0.93 | 0.024   | NA |
| chr1 | 157963540 | 157963947 | KIRREL      | ENSG00000183853 | 308   | 0.31 | 0.27 | 0.93 | 0.038   | NA |
| chr1 | 1414034   | 1414532   | ATAD3B      | ENSG00000160072 | -146  | 0.89 | 1    | 0.94 | -0.11   | NA |
| chr1 | 1562049   | 1562398   | MIB2        | ENSG00000197530 | -17   | 0.94 | 0.93 | 0.94 | 0.016   | NA |
| chr1 | 14924610  | 14925993  | KAZN        | ENSG00000189337 | 101   | 0.22 | 0.21 | 0.94 | 0.0061  | NA |
| chr1 | 40136988  | 40138087  | NT5C1A      | ENSG00000116981 | 173   | 0.21 | 0.21 | 0.94 | -0.0087 | NA |
| chr1 | 40204312  | 40204739  | PPIE        | ENSG00000084072 | -26   | 0.16 | 0.18 | 0.94 | -0.023  | NA |
| chr1 | 51984547  | 51985216  | EPS15       | ENSG00000085832 | 18    | 0.16 | 0.18 | 0.94 | -0.015  | NA |
| chr1 | 109234788 | 109235161 | PRPF38B     | ENSG00000134186 | 29    | 0.17 | 0.19 | 0.94 | -0.016  | NA |
| chr1 | 153935781 | 153936276 | SLC39A1     | ENSG00000143570 | -230  | 0.22 | 0.2  | 0.94 | 0.019   | NA |
| chr1 | 156737035 | 156738013 | PRCC        | ENSG00000143294 | 232   | 0.21 | 0.21 | 0.94 | -0.0079 | NA |
| chr1 | 248020330 | 248021252 | TRIM58      | ENSG00000162722 | 290   | 0.26 | 0.27 | 0.94 | -0.0056 | NA |
| chr1 | 6259178   | 6259883   | RPL22       | ENSG00000116251 | 83    | 0.16 | 0.17 | 0.95 | -0.013  | NA |
| chr1 | 9324687   | 9325016   | H6PD        | ENSG00000049239 | -738  | 0.96 | 1    | 0.95 | -0.04   | NA |

|      |           |           |               |                 |       |      |      |      |         |    |
|------|-----------|-----------|---------------|-----------------|-------|------|------|------|---------|----|
| chr1 | 43919083  | 43919814  | HYI           | ENSG00000178922 | -325  | 0.22 | 0.21 | 0.95 | 0.0058  | NA |
| chr1 | 202311043 | 202311312 | UBE2T         | ENSG00000077152 | -69   | 0.28 | 0.24 | 0.95 | 0.035   | NA |
| chr1 | 220921411 | 220922176 | MOSC2         | ENSG00000117791 | 226   | 0.16 | 0.15 | 0.95 | 0.0087  | NA |
| chr1 | 228353108 | 228353986 | C1orf148      | ENSG00000203684 | -334  | 0.28 | 0.27 | 0.95 | 0.007   | NA |
| chr1 | 1023143   | 1023347   | C1orf159      | ENSG00000131591 | -229  | 0.98 | 0.96 | 0.96 | 0.017   | NA |
| chr1 | 8877598   | 8878092   | RERE          | ENSG00000142599 | -143  | 0.33 | 0.25 | 0.96 | 0.083   | NA |
| chr1 | 91182097  | 91182364  | BARHL2        | ENSG00000143032 | 564   | 0.4  | 0.37 | 0.96 | 0.033   | NA |
| chr1 | 147806900 | 147807170 | U1            | ENSG00000202408 | -149  | 0.24 | 0.3  | 0.96 | -0.065  | NA |
| chr1 | 155164199 | 155165160 | MIR92B        | ENSG00000208011 | -289  | 0.22 | 0.22 | 0.96 | 0.0061  | NA |
| chr1 | 155947678 | 155948490 | ARHGEF2       | ENSG00000116584 | -133  | 0.28 | 0.28 | 0.96 | -0.0051 | NA |
| chr1 | 218519057 | 218519674 | TGFB2         | ENSG00000092969 | -212  | 0.29 | 0.2  | 0.96 | 0.086   | NA |
| chr1 | 16270591  | 16271582  | ZBTB17        | ENSG00000116809 | -233  | 0.96 | 0.96 | 0.97 | 0.0051  | NA |
| chr1 | 27320127  | 27321146  | TRNP1         | ENSG00000253368 | 438   | 0.28 | 0.29 | 0.97 | -0.011  | NA |
| chr1 | 41444870  | 41446116  | CTPS          | ENSG00000171793 | 486   | 0.23 | 0.22 | 0.97 | 0.0039  | NA |
| chr1 | 109791945 | 109792723 | CELSR2        | ENSG00000143126 | -307  | 0.21 | 0.21 | 0.97 | -0.0047 | NA |
| chr1 | 151584374 | 151585205 | RP11-404E16.1 | ENSG00000250734 | 275   | 0.29 | 0.3  | 0.97 | -0.016  | NA |
| chr1 | 155239278 | 155239494 | CLK2          | ENSG00000176444 | -232  | 0.93 | 0.92 | 0.97 | 0.013   | NA |
| chr1 | 155278407 | 155278743 | FDPS          | ENSG00000160752 | 36    | 0.23 | 0.5  | 0.97 | -0.27   | NA |
| chr1 | 160068040 | 160068430 | IGSF8         | ENSG00000162729 | 174   | 0.33 | 0.31 | 0.97 | 0.028   | NA |
| chr1 | 182758395 | 182759097 | NPL           | ENSG00000135838 | 318   | 0.18 | 0.17 | 0.97 | 0.0066  | NA |
| chr1 | 202995472 | 202996185 | PPFIA4        | ENSG00000143847 | 202   | 0.27 | 0.26 | 0.97 | 0.0085  | NA |
| chr1 | 215256051 | 215256636 | KCNK2         | ENSG00000082482 | -124  | 0.25 | 0.26 | 0.97 | -0.0062 | NA |
| chr1 | 235324264 | 235324717 | RBM34         | ENSG00000188739 | -213  | 0.28 | 0.3  | 0.97 | -0.019  | NA |
| chr1 | 247373735 | 247374304 | RP11-488L18.4 | ENSG00000227671 | -1224 | 0.22 | 0.23 | 0.97 | -0.016  | NA |
| chr1 | 1886344   | 1886870   | C1orf222      | ENSG00000142609 | 547   | 0.9  | 0.91 | 0.98 | -0.012  | NA |
| chr1 | 21835548  | 21836344  | ALPL          | ENSG00000162551 | 88    | 0.22 | 0.23 | 0.98 | -0.0043 | NA |
| chr1 | 45308543  | 45309159  | PTCH2         | ENSG00000117425 | -235  | 0.26 | 0.26 | 0.98 | -0.0046 | NA |
| chr1 | 46151751  | 46153080  | GPBP1L1       | ENSG00000159592 | -207  | 0.21 | 0.21 | 0.98 | -0.0029 | NA |
| chr1 | 155034925 | 155036578 | EFNA4         | ENSG00000243364 | -456  | 0.3  | 0.31 | 0.98 | -0.0061 | NA |
| chr1 | 180991719 | 180992149 | STX6          | ENSG00000135823 | 71    | 0.24 | 0.27 | 0.98 | -0.036  | NA |

|      |           |           |              |                 |       |      |      |      |         |    |
|------|-----------|-----------|--------------|-----------------|-------|------|------|------|---------|----|
| chr1 | 200378899 | 200379365 | ZNF281       | ENSG00000162702 | -16   | 0.28 | 0.3  | 0.98 | -0.013  | NA |
| chr1 | 217311467 | 217311773 | ESRRG        | ENSG00000196482 | -523  | 0.77 | 0.5  | 0.98 | 0.27    | NA |
| chr1 | 245026434 | 245028020 | HNRNPU       | ENSG00000153187 | -270  | 0.22 | 0.22 | 0.98 | -0.0031 | NA |
| chr1 | 2040997   | 2041302   | PRKCZ        | ENSG00000067606 | -1944 | 0.97 | 0.96 | 0.99 | 0.0081  | NA |
| chr1 | 22778236  | 22778817  | ZBTB40       | ENSG00000184677 | 182   | 0.22 | 0.22 | 0.99 | -0.0055 | NA |
| chr1 | 109824313 | 109824526 | PSRC1        | ENSG00000134222 | 622   | 0.89 | 1    | 0.99 | -0.11   | NA |
| chr1 | 110091039 | 110091590 | GNAI3        | ENSG00000065135 | 81    | 0.22 | 0.21 | 0.99 | 0.0061  | NA |
| chr1 | 143743395 | 143744949 | BX284650.1   | ENSG00000223804 | 183   | 0.21 | 0.22 | 0.99 | -0.016  | NA |
| chr1 | 241802960 | 241803649 | OPN3         | ENSG00000054277 | 208   | 0.25 | 0.2  | 0.99 | 0.05    | NA |
| chr1 | 135124    | 135563    | RP11-34P13.7 | ENSG00000238009 | -1777 | 1    | 1    | 1    | 0       | NA |
| chr1 | 912869    | 913153    | C1orf170     | ENSG00000187642 | -990  | 1    | 1    | 1    | 0       | NA |
| chr1 | 1024075   | 1024614   | C1orf159     | ENSG00000131591 | -1328 | 0.92 | 0.92 | 1    | -0.0034 | NA |
| chr1 | 1406844   | 1407821   | ATAD3B       | ENSG00000160072 | 189   | 0.36 | 0.36 | 1    | 0.0046  | NA |
| chr1 | 1452701   | 1453199   | ATAD3A       | ENSG00000197785 | -51   | 0.84 | 0.89 | 1    | -0.047  | NA |
| chr1 | 1560780   | 1561055   | MIB2         | ENSG00000197530 | -30   | 0.88 | 1    | 1    | -0.12   | NA |
| chr1 | 1685373   | 1685971   | NADK         | ENSG00000008130 | 150   | 0.91 | 0.91 | 1    | 0.0023  | NA |
| chr1 | 2345891   | 2346156   | PEX10        | ENSG00000157911 | -787  | 0.32 | 0.32 | 1    | 0.00085 | NA |
| chr1 | 2409757   | 2410049   | PLCH2        | ENSG00000149527 | -12   | 1    | 0.92 | 1    | 0.083   | NA |
| chr1 | 2445355   | 2445648   | PANK4        | ENSG00000157881 | 23    | 0.77 | 0.77 | 1    | 0.0062  | NA |
| chr1 | 3527619   | 3528078   | MEGF6        | ENSG00000162591 | 211   | 0.21 | 0.21 | 1    | 0.0021  | NA |
| chr1 | 6202118   | 6202359   | CHD5         | ENSG00000116254 | 1926  | 0.93 | 1    | 1    | -0.067  | NA |
| chr1 | 6525996   | 6526228   | TNFRSF25     | ENSG00000215788 | 47    | 0.82 | 0.83 | 1    | -0.011  | NA |
| chr1 | 8021301   | 8022226   | PARK7        | ENSG00000116288 | 40    | 0.21 | 0.21 | 1    | -0.0006 | NA |
| chr1 | 8390202   | 8390800   | SLC45A1      | ENSG00000162426 | 13    | 0.91 | 0.91 | 1    | -0.0043 | NA |
| chr1 | 9324202   | 9324439   | H6PD         | ENSG00000049239 | -1269 | 0.61 | 0.62 | 1    | -0.0047 | NA |
| chr1 | 9416126   | 9416404   | SPSB1        | ENSG00000171621 | 499   | 1    | 1    | 1    | 0       | NA |
| chr1 | 9775708   | 9775997   | PIK3CD       | ENSG00000171608 | 95    | 0.95 | 1    | 1    | -0.053  | NA |
| chr1 | 10003165  | 10003585  | LZIC         | ENSG00000162441 | 12    | 0.27 | 0.28 | 1    | -0.008  | NA |
| chr1 | 11822139  | 11822363  | C1orf167     | ENSG00000215910 | 407   | 0.26 | 0.23 | 1    | 0.034   | NA |
| chr1 | 12079251  | 12079903  | MIIP         | ENSG00000116691 | 54    | 0.19 | 0.19 | 1    | 0.0032  | NA |

|      |          |          |              |                 |      |      |      |   |         |    |
|------|----------|----------|--------------|-----------------|------|------|------|---|---------|----|
| chr1 | 15911088 | 15911608 | AGMAT        | ENSG00000116771 | 257  | 0.17 | 0.16 | 1 | 0.011   | NA |
| chr1 | 16399648 | 16400072 | FAM131C      | ENSG00000185519 | 261  | 0.2  | 0.19 | 1 | 0.012   | NA |
| chr1 | 16678574 | 16679192 | FBXO42       | ENSG00000037637 | 66   | 0.28 | 0.27 | 1 | 0.0063  | NA |
| chr1 | 16766998 | 16767803 | NECAP2       | ENSG00000157191 | 233  | 0.23 | 0.23 | 1 | -0.0014 | NA |
| chr1 | 17331885 | 17332093 | ATP13A2      | ENSG00000159363 | -99  | 1    | 0.95 | 1 | 0.049   | NA |
| chr1 | 17337829 | 17338590 | ATP13A2      | ENSG00000159363 | 58   | 0.37 | 0.37 | 1 | 0.0023  | NA |
| chr1 | 19536151 | 19537046 | UBR4         | ENSG00000127481 | 148  | 0.19 | 0.19 | 1 | -0.0008 | NA |
| chr1 | 19923341 | 19924002 | C1orf151     | ENSG00000173436 | 194  | 0.22 | 0.22 | 1 | 0.00057 | NA |
| chr1 | 21022939 | 21023189 | KIF17        | ENSG00000117245 | 1868 | 0.45 | 0.42 | 1 | 0.027   | NA |
| chr1 | 21996161 | 21996409 | RAP1GAP      | ENSG00000076864 | -429 | 0.36 | 0.33 | 1 | 0.035   | NA |
| chr1 | 22456023 | 22456225 | WNT4         | ENSG00000162552 | 220  | 1    | 1    | 1 | 0       | NA |
| chr1 | 24069695 | 24070615 | TCEB3        | ENSG00000011007 | -369 | 0.18 | 0.18 | 1 | #####   | NA |
| chr1 | 24117482 | 24117824 | LYPLA2       | ENSG00000011009 | 7    | 0.26 | 0.26 | 1 | 0.0027  | NA |
| chr1 | 24739857 | 24740262 | C1orf201     | ENSG00000001460 | 156  | 0.36 | 0.37 | 1 | -0.0097 | NA |
| chr1 | 26097904 | 26098107 | MAN1C1       | ENSG00000117643 | -555 | 0.27 | 0.27 | 1 | 0.0059  | NA |
| chr1 | 26632836 | 26633316 | UBXN11       | ENSG00000158062 | -9   | 1    | 1    | 1 | 0       | NA |
| chr1 | 26662538 | 26663466 | AIM1L        | ENSG00000176092 | -128 | 0.26 | 0.27 | 1 | -0.002  | NA |
| chr1 | 27114118 | 27114692 | PIGV         | ENSG00000060642 | -50  | 0.23 | 0.23 | 1 | 0.0013  | NA |
| chr1 | 27527884 | 27528085 | RP11-40H20.1 | ENSG00000214973 | -20  | 0.96 | 0.96 | 1 | 0.0034  | NA |
| chr1 | 29240768 | 29241969 | EPB41        | ENSG00000159023 | 277  | 0.23 | 0.23 | 1 | -0.0011 | NA |
| chr1 | 29587087 | 29587412 | PTPRU        | ENSG00000060656 | 556  | 0.83 | 0.85 | 1 | -0.013  | NA |
| chr1 | 31769246 | 31769978 | SNRNP40      | ENSG00000060688 | 5    | 0.28 | 0.27 | 1 | 0.0015  | NA |
| chr1 | 32083149 | 32084069 | HCRTR1       | ENSG00000121764 | 322  | 0.23 | 0.23 | 1 | #####   | NA |
| chr1 | 32254004 | 32254353 | RP11-84A19.3 | ENSG00000254545 | -553 | 0.34 | 0.33 | 1 | 0.0088  | NA |
| chr1 | 32930500 | 32931061 | RP1-27O5.3   | ENSG00000254553 | 122  | 0.2  | 0.5  | 1 | -0.3    | NA |
| chr1 | 33745741 | 33745990 | ZNF362       | ENSG00000160094 | -86  | 1    | 1    | 1 | 0       | NA |
| chr1 | 33815950 | 33816193 | RP11-415J8.5 | ENSG00000233246 | 118  | 0.33 | 0.33 | 1 | 0.00033 | NA |
| chr1 | 36554325 | 36554955 | ADPRHL2      | ENSG00000116863 | 164  | 0.16 | 0.16 | 1 | 0.0013  | NA |
| chr1 | 38478082 | 38478727 | UTP11L       | ENSG00000183520 | -2   | 0.22 | 0.2  | 1 | 0.022   | NA |
| chr1 | 39547013 | 39547959 | MACF1        | ENSG00000127603 | 498  | 0.24 | 0.24 | 1 | 0.0038  | NA |

|      |          |          |              |                 |       |      |      |   |         |    |
|------|----------|----------|--------------|-----------------|-------|------|------|---|---------|----|
| chr1 | 40562666 | 40563128 | PPT1         | ENSG00000131238 | -172  | 0.16 | 0.15 | 1 | 0.0084  | NA |
| chr1 | 43613488 | 43613842 | FAM183A      | ENSG00000186973 | 127   | 0.14 | 0.07 | 1 | 0.072   | NA |
| chr1 | 43833828 | 43834137 | ELOVL1       | ENSG00000066322 | -285  | 0.16 | 0.17 | 1 | -0.0088 | NA |
| chr1 | 44056755 | 44057179 | PTPRF        | ENSG00000142949 | -154  | 0.9  | 1    | 1 | -0.1    | NA |
| chr1 | 44070892 | 44071142 | PTPRF        | ENSG00000142949 | -236  | 1    | 1    | 1 | 0       | NA |
| chr1 | 45241013 | 45241900 | RPS8         | ENSG00000142937 | 347   | 0.24 | 0.21 | 1 | 0.027   | NA |
| chr1 | 45805564 | 45805983 | MUTYH        | ENSG00000132781 | -166  | 0.43 | 0.5  | 1 | -0.071  | NA |
| chr1 | 46016403 | 46016694 | AKR1A1       | ENSG00000117448 | 72    | 0.19 | 0.19 | 1 | -0.0021 | NA |
| chr1 | 48459812 | 48460061 | RP4-683M8.1  | ENSG00000239802 | 336   | 1    | 1    | 1 | 0       | NA |
| chr1 | 52869867 | 52870305 | ORC1         | ENSG00000085840 | -27   | 0.25 | 0.25 | 1 | 0.003   | NA |
| chr1 | 53192023 | 53192428 | ZYG11B       | ENSG00000162378 | 99    | 0.67 | 0.79 | 1 | -0.12   | NA |
| chr1 | 53544104 | 53544683 | PODN         | ENSG00000174348 | 110   | 1    | 1    | 1 | 0       | NA |
| chr1 | 53558388 | 53558642 | SLC1A7       | ENSG00000162383 | -1861 | 1    | 1    | 1 | 0       | NA |
| chr1 | 53662309 | 53662815 | CPT2         | ENSG00000157184 | 31    | 0.22 | 0.22 | 1 | 0.00019 | NA |
| chr1 | 53685945 | 53686391 | C1orf123     | ENSG00000162384 | 96    | 0.33 | 0.37 | 1 | -0.035  | NA |
| chr1 | 54355354 | 54355656 | YIPF1        | ENSG00000058799 | -53   | 0.17 | 0.16 | 1 | 0.0052  | NA |
| chr1 | 54665821 | 54666259 | MRPL37       | ENSG00000116221 | 200   | 0.21 | 0.25 | 1 | -0.031  | NA |
| chr1 | 54723696 | 54724019 | SSBP3        | ENSG00000157216 | -918  | 0.97 | 0.96 | 1 | 0.0074  | NA |
| chr1 | 55181345 | 55181853 | TTC4         | ENSG00000243725 | 104   | 0.2  | 0.19 | 1 | 0.011   | NA |
| chr1 | 57044102 | 57045117 | PPAP2B       | ENSG00000162407 | 632   | 0.28 | 0.27 | 1 | 0.0027  | NA |
| chr1 | 61548753 | 61549564 | NFIA         | ENSG00000162599 | 763   | 0.2  | 0.2  | 1 | -0.0015 | NA |
| chr1 | 68628999 | 68629202 | RP11-518D3.3 | ENSG00000234383 | -327  | 0.98 | 1    | 1 | -0.023  | NA |
| chr1 | 71546486 | 71546783 | ZRANB2       | ENSG00000132485 | 60    | 0.21 | 0.2  | 1 | 0.012   | NA |
| chr1 | 78354381 | 78354673 | NEXN         | ENSG00000162614 | 180   | 0.22 | 0.24 | 1 | -0.013  | NA |
| chr1 | 86861566 | 86862083 | ODF2L        | ENSG00000122417 | -164  | 0.21 | 0.19 | 1 | 0.025   | NA |
| chr1 | 87793802 | 87795142 | LMO4         | ENSG00000143013 | 321   | 0.24 | 0.24 | 1 | -0.0047 | NA |
| chr1 | 89356963 | 89357391 | GTF2B        | ENSG00000137947 | 2     | 0.17 | 0.18 | 1 | -0.01   | NA |
| chr1 | 91182509 | 91182857 | BARHL2       | ENSG00000143032 | 111   | 0.25 | 0.25 | 1 | -0.0036 | NA |
| chr1 | 91359122 | 91359563 | PHKA1P1      | ENSG00000232882 | -173  | 0.97 | 0.98 | 1 | -0.0045 | NA |
| chr1 | 92764173 | 92764926 | RPAP2        | ENSG00000122484 | 27    | 0.18 | 0.18 | 1 | 0.0032  | NA |

|      |           |           |               |                 |       |      |      |   |         |    |
|------|-----------|-----------|---------------|-----------------|-------|------|------|---|---------|----|
| chr1 | 93544558  | 93545032  | MTF2          | ENSG00000143033 | 3     | 0.25 | 0.24 | 1 | 0.012   | NA |
| chr1 | 93811218  | 93811940  | RP4-717I23.3  | ENSG00000223745 | -239  | 0.18 | 0.19 | 1 | -0.01   | NA |
| chr1 | 95538251  | 95538551  | ALG14         | ENSG00000172339 | 29    | 0.27 | 0.27 | 1 | #####   | NA |
| chr1 | 108735227 | 108735513 | SLC25A24      | ENSG00000085491 | 61    | 0.97 | 0.96 | 1 | 0.014   | NA |
| chr1 | 109642663 | 109643384 | SCARNA2       | ENSG00000238881 | 208   | 0.27 | 0.3  | 1 | -0.027  | NA |
| chr1 | 110026630 | 110026903 | ATXN7L2       | ENSG00000162650 | 205   | 0.28 | 0.27 | 1 | 0.0039  | NA |
| chr1 | 110577199 | 110577942 | FAM40A        | ENSG00000143093 | 332   | 0.19 | 0.19 | 1 | -0.0003 | NA |
| chr1 | 110765665 | 110766012 | KCNC4         | ENSG00000116396 | -622  | 0.98 | 0.98 | 1 | 0.0026  | NA |
| chr1 | 111682227 | 111683303 | CEPT1         | ENSG00000134255 | 516   | 0.28 | 0.27 | 1 | 0.0071  | NA |
| chr1 | 111991304 | 111992202 | WDR77         | ENSG00000116455 | -402  | 0.26 | 0.26 | 1 | 0.0057  | NA |
| chr1 | 112162204 | 112162837 | RAP1A         | ENSG00000116473 | 121   | 0.23 | 0.23 | 1 | 0.0029  | NA |
| chr1 | 116961182 | 116961542 | ATP1A1OS      | ENSG00000203865 | -176  | 0.16 | 0.16 | 1 | -0.0051 | NA |
| chr1 | 120611348 | 120612440 | NOTCH2        | ENSG00000134250 | 181   | 0.1  | 0.09 | 1 | 0.0047  | NA |
| chr1 | 120905971 | 120906396 | HIST2H2BA     | ENSG00000223345 | 155   | 0.14 | 0.2  | 1 | -0.057  | NA |
| chr1 | 120925178 | 120926081 | RP11-439A17.9 | ENSG00000233029 | -5    | 0.27 | 0.31 | 1 | -0.048  | NA |
| chr1 | 145208944 | 145210075 | NOTCH2NL      | ENSG00000213240 | 390   | 0.12 | 0.12 | 1 | 0.0014  | NA |
| chr1 | 145507588 | 145507931 | RBM8A         | ENSG00000131795 | 161   | 0.28 | 0.29 | 1 | -0.0017 | NA |
| chr1 | 145826491 | 145827224 | GPR89A        | ENSG00000117262 | 158   | 0.27 | 0.27 | 1 | 0.00066 | NA |
| chr1 | 146556312 | 146556676 | RP11-325P15.2 | ENSG00000230832 | -1367 | 0.2  | 0.2  | 1 | 0.0034  | NA |
| chr1 | 147071249 | 147071875 | BCL9          | ENSG00000116128 | -426  | 0.3  | 0.29 | 1 | 0.004   | NA |
| chr1 | 147400354 | 147401087 | GPR89B        | ENSG00000188092 | 214   | 0.22 | 0.21 | 1 | 0.0047  | NA |
| chr1 | 148241109 | 148241449 | U1            | ENSG00000207501 | -186  | 0.76 | 0.79 | 1 | -0.033  | NA |
| chr1 | 149230771 | 149231197 | RP11-403I13.5 | ENSG00000232721 | 268   | 0.29 | 0.27 | 1 | 0.015   | NA |
| chr1 | 149399898 | 149400518 | RP5-998N21.7  | ENSG00000230186 | 145   | 0.17 | 0.17 | 1 | -0.0069 | NA |
| chr1 | 149811754 | 149815044 | HIST2H3C      | ENSG00000203811 | -634  | 0.2  | 0.23 | 1 | -0.027  | NA |
| chr1 | 149821901 | 149825191 | HIST2H2BD     | ENSG00000203819 | -1206 | 1    | 1    | 1 | 0       | NA |
| chr1 | 149899625 | 149899893 | SF3B4         | ENSG00000143368 | -276  | 0.23 | 0.21 | 1 | 0.018   | NA |
| chr1 | 150336831 | 150337289 | RPRD2         | ENSG00000163125 | -66   | 0.17 | 0.17 | 1 | 0       | NA |
| chr1 | 150848994 | 150849265 | ARNT          | ENSG00000143437 | -85   | 0.33 | 0.27 | 1 | 0.066   | NA |
| chr1 | 151762604 | 151764007 | TDRKH         | ENSG00000182134 | -399  | 0.28 | 0.27 | 1 | 0.0074  | NA |

|      |           |           |               |                 |      |      |      |   |         |    |
|------|-----------|-----------|---------------|-----------------|------|------|------|---|---------|----|
| chr1 | 153700216 | 153700607 | INTS3         | ENSG00000143624 | -132 | 0.42 | 0.42 | 1 | -0.0039 | NA |
| chr1 | 153894837 | 153895921 | GATAD2B       | ENSG00000143614 | 72   | 0.25 | 0.24 | 1 | 0.0043  | NA |
| chr1 | 153939643 | 153939980 | CREB3L4       | ENSG00000143578 | -199 | 0.32 | 0.32 | 1 | -0.0042 | NA |
| chr1 | 153963227 | 153963510 | RPS27         | ENSG00000177954 | 133  | 1    | 1    | 1 | 0       | NA |
| chr1 | 154531054 | 154531565 | UBE2Q1        | ENSG00000160714 | -200 | 0.2  | 0.18 | 1 | 0.016   | NA |
| chr1 | 154975209 | 154975411 | ZBTB7B        | ENSG00000160685 | 15   | 0.27 | 0.5  | 1 | -0.23   | NA |
| chr1 | 155231812 | 155232312 | SCAMP3        | ENSG00000116521 | -44  | 0.29 | 0.35 | 1 | -0.064  | NA |
| chr1 | 155242861 | 155243436 | CLK2          | ENSG00000176444 | -70  | 0.22 | 0.2  | 1 | 0.013   | NA |
| chr1 | 155246991 | 155247748 | HCN3          | ENSG00000143630 | -5   | 0.21 | 0.2  | 1 | 0.011   | NA |
| chr1 | 156426549 | 156427362 | RP11-98G7.1   | ENSG00000236947 | -586 | 0.22 | 0.23 | 1 | -0.0081 | NA |
| chr1 | 156593657 | 156595283 | HAPLN2        | ENSG00000132702 | 614  | 0.31 | 0.31 | 1 | 0.0031  | NA |
| chr1 | 159869901 | 159870143 | CCDC19        | ENSG00000213085 | -120 | 0.17 | 0.17 | 1 | -0.0027 | NA |
| chr1 | 159915368 | 159915797 | IGSF9         | ENSG00000085552 | -199 | 0.17 | 0.33 | 1 | -0.17   | NA |
| chr1 | 160231755 | 160232451 | DCAF8         | ENSG00000132716 | 94   | 0.26 | 0.26 | 1 | -0.0002 | NA |
| chr1 | 160990718 | 160991225 | F11R          | ENSG00000158769 | -85  | 0.5  | 0.33 | 1 | 0.17    | NA |
| chr1 | 161087722 | 161088112 | PFDN2         | ENSG00000143256 | -72  | 0.17 | 0.17 | 1 | 0.005   | NA |
| chr1 | 161171809 | 161172256 | NDUFS2        | ENSG00000158864 | 196  | 0.23 | 0.23 | 1 | #####   | NA |
| chr1 | 161283775 | 161284007 | SDHC          | ENSG00000143252 | -156 | 1    | 1    | 1 | 0       | NA |
| chr1 | 163392877 | 163393100 | RP11-408E1.1  | ENSG00000225122 | -34  | 1    | 0.99 | 1 | 0.0098  | NA |
| chr1 | 166958220 | 166958683 | MAEL          | ENSG00000143194 | 105  | 0.97 | 0.98 | 1 | -0.0059 | NA |
| chr1 | 171454517 | 171455239 | PRRC2C        | ENSG00000117523 | 227  | 0.24 | 0.24 | 1 | -0.0028 | NA |
| chr1 | 171639947 | 171640224 | RP4-560B9.2   | ENSG00000233328 | -6   | 1    | 1    | 1 | 0       | NA |
| chr1 | 178511362 | 178512356 | C1orf220      | ENSG00000213057 | -28  | 0.2  | 0.2  | 1 | -0.0008 | NA |
| chr1 | 184020781 | 184021054 | TSEN15        | ENSG00000198860 | 106  | 0.31 | 0.33 | 1 | -0.024  | NA |
| chr1 | 193090728 | 193091224 | CDC73         | ENSG00000134371 | -171 | 0.19 | 0.33 | 1 | -0.14   | NA |
| chr1 | 197887088 | 197887791 | LHX9          | ENSG00000143355 | 910  | 0.27 | 0.26 | 1 | 0.0061  | NA |
| chr1 | 200010625 | 200010832 | NR5A2         | ENSG00000116833 | -989 | 0.5  | 0.43 | 1 | 0.072   | NA |
| chr1 | 200860076 | 200860576 | C1orf106      | ENSG00000163362 | 150  | 0.24 | 0.27 | 1 | -0.031  | NA |
| chr1 | 202611668 | 202613039 | SYT2          | ENSG00000143858 | 228  | 0.34 | 0.34 | 1 | -0.001  | NA |
| chr1 | 202779790 | 202780684 | RP11-480I12.3 | ENSG00000228288 | 155  | 0.25 | 0.24 | 1 | 0.00059 | NA |



|      |           |           |               |                 |       |      |      |   |         |    |
|------|-----------|-----------|---------------|-----------------|-------|------|------|---|---------|----|
| chr1 | 203764568 | 203765293 | ZC3H11A       | ENSG00000058673 | 148   | 0.35 | 0.35 | 1 | -0.0045 | NA |
| chr1 | 204346732 | 204347430 | RP11-739N20.1 | ENSG00000223673 | -288  | 0.25 | 0.25 | 1 | 0.00043 | NA |
| chr1 | 205290232 | 205291035 | NUAK2         | ENSG00000163545 | 250   | 0.23 | 0.23 | 1 | -0.0003 | NA |
| chr1 | 205631977 | 205632254 | SLC45A3       | ENSG00000158715 | -319  | 1    | 1    | 1 | 0       | NA |
| chr1 | 208084098 | 208084513 | CD34          | ENSG00000174059 | 156   | 0.15 | 0.12 | 1 | 0.026   | NA |
| chr1 | 214161197 | 214161415 | PROX1         | ENSG00000117707 | 26    | 0.33 | 0.32 | 1 | 0.0054  | NA |
| chr1 | 215043777 | 215044003 | GAPDHP24      | ENSG00000185221 | -187  | 1    | 1    | 1 | 0       | NA |
| chr1 | 218458019 | 218458684 | RRP15         | ENSG00000067533 | -278  | 0.33 | 0.31 | 1 | 0.02    | NA |
| chr1 | 219786334 | 219786562 | ZC3H11B       | ENSG00000215817 | 14    | 1    | 1    | 1 | 0       | NA |
| chr1 | 220219416 | 220219824 | EPRS          | ENSG00000136628 | 178   | 0.28 | 0.29 | 1 | -0.011  | NA |
| chr1 | 220267314 | 220267934 | IARS2         | ENSG00000067704 | 180   | 0.18 | 0.18 | 1 | -0.0003 | NA |
| chr1 | 220445480 | 220445933 | RAB3GAP2      | ENSG00000118873 | -27   | 0.19 | 0.19 | 1 | 0.0038  | NA |
| chr1 | 223741965 | 223744525 | WI2-2998D17.2 | ENSG00000235428 | -383  | 0.5  | 0.4  | 1 | 0.1     | NA |
| chr1 | 226496361 | 226497501 | LIN9          | ENSG00000183814 | -159  | 0.2  | 0.2  | 1 | -0.0009 | NA |
| chr1 | 227505446 | 227506752 | CDC42BPA      | ENSG00000143776 | -273  | 0.21 | 0.21 | 1 | -0.0023 | NA |
| chr1 | 228003827 | 228004083 | PRSS38        | ENSG00000185888 | 561   | 1    | 1    | 1 | 0       | NA |
| chr1 | 228161368 | 228161576 | RP11-192I3.2  | ENSG00000233003 | 1914  | 0.98 | 1    | 1 | -0.024  | NA |
| chr1 | 228403232 | 228403528 | OBSCN         | ENSG00000154358 | -10   | 0.94 | 0.96 | 1 | -0.014  | NA |
| chr1 | 228463249 | 228464488 | OBSCN         | ENSG00000154358 | -1011 | 0.24 | 0.24 | 1 | 0.0031  | NA |
| chr1 | 228603706 | 228604567 | TRIM17        | ENSG00000162931 | -406  | 0.2  | 0.19 | 1 | 0.0079  | NA |
| chr1 | 228870810 | 228872297 | RHOU          | ENSG00000116574 | 729   | 0.24 | 0.24 | 1 | 0.0014  | NA |
| chr1 | 229478014 | 229478935 | C1orf96       | ENSG00000154429 | -210  | 0.2  | 0.2  | 1 | -0.0042 | NA |
| chr1 | 231003631 | 231004655 | C1orf198      | ENSG00000119280 | 256   | 0.26 | 0.25 | 1 | 0.0028  | NA |
| chr1 | 231176785 | 231177009 | FAM89A        | ENSG00000182118 | -905  | 0.24 | 0.22 | 1 | 0.016   | NA |
| chr1 | 231376796 | 231377243 | C1orf131      | ENSG00000143633 | -183  | 0.21 | 0.21 | 1 | 0.0025  | NA |
| chr1 | 232941054 | 232941707 | KIAA1383      | ENSG00000212916 | 737   | 0.2  | 0.19 | 1 | 0.0059  | NA |
| chr1 | 233121927 | 233122136 | PCNXL2        | ENSG00000135749 | -401  | 0.99 | 0.99 | 1 | 0.003   | NA |
| chr1 | 234508994 | 234509501 | C1orf31       | ENSG00000168275 | 45    | 0.26 | 0.26 | 1 | -0.0083 | NA |
| chr1 | 242220284 | 242220615 | RP11-323D18.4 | ENSG00000224625 | 62    | 0.89 | 0.88 | 1 | 0.012   | NA |
| chr1 | 242220749 | 242221000 | RP11-323D18.4 | ENSG00000224625 | 487   | 1    | 1    | 1 | 0       | NA |

|      |           |           |               |                 |       |      |      |    |        |    |
|------|-----------|-----------|---------------|-----------------|-------|------|------|----|--------|----|
| chr1 | 247094485 | 247095667 | AHCTF1        | ENSG00000153207 | -411  | 0.24 | 0.23 | 1  | 0.0023 | NA |
| chr1 | 248100325 | 248100726 | OR2L13        | ENSG00000196071 | 32    | 0.25 | 0.24 | 1  | 0.0078 | NA |
| chr1 | 327790    | 328229    | RP4-669L17.4  | ENSG00000224813 | -1775 | NA   | 1    | NA | NA     | NA |
| chr1 | 981068    | 981400    | AGRN          | ENSG00000188157 | 455   | 0.77 | NA   | NA | NA     | NA |
| chr1 | 1026377   | 1026625   | C1orf159      | ENSG00000131591 | 956   | 1    | NA   | NA | NA     | NA |
| chr1 | 1691767   | 1692063   | NADK          | ENSG00000008130 | -1834 | 0.88 | NA   | NA | NA     | NA |
| chr1 | 2938633   | 2939043   | ACTRT2        | ENSG00000169717 | 587   | 0.86 | NA   | NA | NA     | NA |
| chr1 | 6268820   | 6269588   | RNF207        | ENSG00000158286 | 284   | 0.2  | NA   | NA | NA     | NA |
| chr1 | 11795975  | 11796263  | AGTRAP        | ENSG00000177674 | -22   | 0.38 | NA   | NA | NA     | NA |
| chr1 | 17734435  | 17734645  | RCC2          | ENSG00000179051 | 1002  | 1    | NA   | NA | NA     | NA |
| chr1 | 22351917  | 22352194  | RP1-224A6.4   | ENSG00000218510 | 51    | 0.62 | NA   | NA | NA     | NA |
| chr1 | 23945941  | 23946295  | AL451000.1    | ENSG00000247296 | -161  | 0.19 | NA   | NA | NA     | NA |
| chr1 | 24285785  | 24286701  | PNRC2         | ENSG00000189266 | -59   | NA   | 1    | NA | NA     | NA |
| chr1 | 25593277  | 25593678  | C1orf63       | ENSG00000117616 | 850   | 1    | NA   | NA | NA     | NA |
| chr1 | 25593957  | 25594487  | C1orf63       | ENSG00000117616 | 105   | 0.18 | NA   | NA | NA     | NA |
| chr1 | 31190972  | 31191221  | RP5-1166H10.2 | ENSG00000186056 | 156   | NA   | 1    | NA | NA     | NA |
| chr1 | 32713918  | 32714186  | FAM167B       | ENSG00000183615 | 1218  | NA   | 0.5  | NA | NA     | NA |
| chr1 | 35227028  | 35227276  | GJB4          | ENSG00000189433 | 1810  | 1    | NA   | NA | NA     | NA |
| chr1 | 36689759  | 36690087  | THRAP3        | ENSG00000054118 | -94   | NA   | 0.83 | NA | NA     | NA |
| chr1 | 40781679  | 40781956  | COL9A2        | ENSG00000049089 | -110  | 0.22 | NA   | NA | NA     | NA |
| chr1 | 43204115  | 43204323  | CLDN19        | ENSG00000164007 | 1592  | 1    | NA   | NA | NA     | NA |
| chr1 | 54821990  | 54822333  | SSBP3         | ENSG00000157216 | 330   | 0.19 | NA   | NA | NA     | NA |
| chr1 | 54872673  | 54873000  | SSBP3         | ENSG00000157216 | -744  | NA   | 0.31 | NA | NA     | NA |
| chr1 | 62119874  | 62120093  | RP11-430G17.1 | ENSG00000223920 | 162   | 1    | NA   | NA | NA     | NA |
| chr1 | 65533592  | 65533965  | RP4-535B20.1  | ENSG00000231485 | -358  | 0.27 | NA   | NA | NA     | NA |
| chr1 | 78277366  | 78277607  | RP11-181C21.4 | ENSG00000219201 | -20   | NA   | 0.46 | NA | NA     | NA |
| chr1 | 78444303  | 78444605  | FUBP1         | ENSG00000162613 | 291   | NA   | 0.21 | NA | NA     | NA |
| chr1 | 101360588 | 101360832 | EXTL2         | ENSG00000162694 | -323  | NA   | 0.33 | NA | NA     | NA |
| chr1 | 108815330 | 108815872 | RP11-483I13.4 | ENSG00000188740 | 36    | NA   | 1    | NA | NA     | NA |
| chr1 | 108963749 | 108964291 | RP11-242D10.2 | ENSG00000238118 | -103  | NA   | 1    | NA | NA     | NA |

|      |           |           |               |                 |      |      |      |    |    |    |
|------|-----------|-----------|---------------|-----------------|------|------|------|----|----|----|
| chr1 | 109656095 | 109656611 | KIAA1324      | ENSG00000116299 | 52   | 1    | NA   | NA | NA | NA |
| chr1 | 110230238 | 110230614 | GSTM1         | ENSG00000134184 | -10  | NA   | 0.54 | NA | NA | NA |
| chr1 | 110880394 | 110880624 | RBM15         | ENSG00000162775 | -619 | 0.26 | NA   | NA | NA | NA |
| chr1 | 111889138 | 111889539 | C1orf88       | ENSG00000173947 | 116  | 0.42 | NA   | NA | NA | NA |
| chr1 | 113497986 | 113498206 | SLC16A1       | ENSG00000155380 | 520  | 1    | NA   | NA | NA | NA |
| chr1 | 118727816 | 118728097 | SPAG17        | ENSG00000155761 | -110 | 0.33 | NA   | NA | NA | NA |
| chr1 | 120254844 | 120255499 | PHGDH         | ENSG00000092621 | 585  | 1    | NA   | NA | NA | NA |
| chr1 | 120395809 | 120396075 | RP5-1042I8.3  | ENSG00000227205 | 3    | NA   | 1    | NA | NA | NA |
| chr1 | 144481122 | 144481711 | AL592284.1    | ENSG00000236943 | 93   | 0.64 | NA   | NA | NA | NA |
| chr1 | 145611270 | 145611519 | RNF115        | ENSG00000121848 | 99   | NA   | 0.12 | NA | NA | NA |
| chr1 | 146550290 | 146551260 | U1            | ENSG00000201142 | -520 | 0.22 | NA   | NA | NA | NA |
| chr1 | 147486967 | 147487310 | U1            | ENSG00000206791 | -323 | 1    | NA   | NA | NA | NA |
| chr1 | 147752859 | 147753165 | RP11-495P10.6 | ENSG00000234283 | -157 | 0.33 | NA   | NA | NA | NA |
| chr1 | 147930918 | 147932478 | RP11-495P10.2 | ENSG00000215863 | 183  | 0.56 | NA   | NA | NA | NA |
| chr1 | 148247245 | 148248092 | RP11-89F3.2   | ENSG00000236140 | 436  | 0.21 | NA   | NA | NA | NA |
| chr1 | 148598409 | 148599257 | RP11-666A1.3  | ENSG00000226675 | 143  | 0.46 | NA   | NA | NA | NA |
| chr1 | 149575948 | 149577505 | RP11-277L2.2  | ENSG00000232151 | 565  | 1    | NA   | NA | NA | NA |
| chr1 | 149832164 | 149833251 | HIST2H4B      | ENSG00000182217 | -3   | NA   | 1    | NA | NA | NA |
| chr1 | 150266476 | 150266689 | MRPS21        | ENSG00000187145 | 242  | 0.39 | NA   | NA | NA | NA |
| chr1 | 150534075 | 150534301 | C1orf138      | ENSG00000203804 | -219 | 0.3  | NA   | NA | NA | NA |
| chr1 | 150898619 | 150898839 | SETDB1        | ENSG00000143379 | -10  | 0.27 | NA   | NA | NA | NA |
| chr1 | 151300522 | 151300724 | PI4KB         | ENSG00000143393 | -432 | 1    | NA   | NA | NA | NA |
| chr1 | 154946237 | 154946498 | SHC1          | ENSG00000160691 | 445  | 0.4  | NA   | NA | NA | NA |
| chr1 | 155197116 | 155197534 | GBAP1         | ENSG00000160766 | -112 | 0.33 | NA   | NA | NA | NA |
| chr1 | 156308173 | 156308442 | CCT3          | ENSG00000163468 | -51  | 0.26 | NA   | NA | NA | NA |
| chr1 | 167789396 | 167789647 | RP1-313L4.4   | ENSG00000250762 | -35  | NA   | 0.67 | NA | NA | NA |
| chr1 | 180991227 | 180991465 | STX6          | ENSG00000135823 | 659  | 0.5  | NA   | NA | NA | NA |
| chr1 | 182573375 | 182573760 | RGS16         | ENSG00000143333 | -24  | 1    | NA   | NA | NA | NA |
| chr1 | 185703458 | 185703662 | HMCN1         | ENSG00000143341 | -123 | 0.2  | NA   | NA | NA | NA |
| chr1 | 203830507 | 203830901 | SNRPE         | ENSG00000182004 | -27  | 0.26 | NA   | NA | NA | NA |

|       |           |           |               |                 |       |      |      |          |       |    |
|-------|-----------|-----------|---------------|-----------------|-------|------|------|----------|-------|----|
| chr1  | 205561089 | 205561473 | MFSD4         | ENSG00000174514 | 116   | 1    | NA   | NA       | NA    | NA |
| chr1  | 222790947 | 222791220 | MIA3          | ENSG00000154305 | -345  | 0.29 | NA   | NA       | NA    | NA |
| chr1  | 227682216 | 227682938 | RP11-275O4.1  | ENSG00000237469 | 266   | NA   | 1    | NA       | NA    | NA |
| chr1  | 227693787 | 227694509 | RP11-275O4.2  | ENSG00000235827 | 265   | 1    | NA   | NA       | NA    | NA |
| chr1  | 227916425 | 227916736 | SNAP47        | ENSG00000143740 | 172   | 0.24 | NA   | NA       | NA    | NA |
| chr1  | 228612580 | 228613103 | HIST3H3       | ENSG00000168148 | 185   | 1    | NA   | NA       | NA    | NA |
| chr1  | 230778077 | 230778593 | COG2          | ENSG00000135775 | 100   | 0.22 | NA   | NA       | NA    | NA |
| chr1  | 243264940 | 243265196 | RP11-261C10.3 | ENSG00000214837 | -48   | 0.5  | NA   | NA       | NA    | NA |
| chr10 | 135123238 | 135123448 | ZNF511        | ENSG00000198546 | 399   | 0.96 | 0.52 | 1.70E-09 | 0.45  | NA |
| chr10 | 49674243  | 49674776  | ARHGAP22      | ENSG00000128805 | 230   | 0.42 | 0.17 | 2.20E-09 | 0.24  | NA |
| chr10 | 101874821 | 101875139 | RP11-316M21.8 | ENSG00000232230 | 0     | 0.97 | 0.37 | 3.70E-09 | 0.6   | NA |
| chr10 | 8100384   | 8100768   | GATA3         | ENSG00000107485 | 214   | 0.96 | 0.62 | 6.20E-09 | 0.35  | NA |
| chr10 | 99531025  | 99531968  | SFRP5         | ENSG00000120057 | 213   | 0.48 | 0.14 | 9.40E-09 | 0.34  | NA |
| chr10 | 3823789   | 3824017   | KLF6          | ENSG00000067082 | 340   | 0.98 | 0.68 | 1.10E-08 | 0.3   | NA |
| chr10 | 82295501  | 82296192  | RP11-137H2.4  | ENSG00000226659 | -148  | 0.91 | 0.65 | 1.20E-08 | 0.26  | NA |
| chr10 | 118895963 | 118898037 | VAX1          | ENSG00000148704 | 567   | 0.57 | 0.37 | 3.90E-08 | 0.2   | NA |
| chr10 | 44101813  | 44102366  | ZNF485        | ENSG00000198298 | 234   | 0.42 | 0.15 | 6.20E-08 | 0.26  | NA |
| chr10 | 1404659   | 1406219   | RP11-398B16.2 | ENSG00000233052 | -1607 | 0.97 | 0.87 | 6.50E-08 | 0.1   | NA |
| chr10 | 27529218  | 27530102  | ACBD5         | ENSG00000107897 | -173  | 0.32 | 0.14 | 1.30E-07 | 0.18  | NA |
| chr10 | 101989127 | 101989533 | CHUK          | ENSG00000213341 | 46    | 0.35 | 0.11 | 1.30E-07 | 0.24  | NA |
| chr10 | 134209367 | 134211056 | PWWP2B        | ENSG00000171813 | -461  | 0.36 | 0.21 | 1.40E-07 | 0.15  | NA |
| chr10 | 99078811  | 99081048  | FRAT1         | ENSG00000165879 | 907   | 0.31 | 0.17 | 1.50E-07 | 0.14  | NA |
| chr10 | 125751132 | 125751984 | RP11-47G11.3  | ENSG00000213438 | 132   | 0.54 | 0.27 | 2.30E-07 | 0.28  | NA |
| chr10 | 25305318  | 25306024  | THNSL1        | ENSG00000185875 | 84    | 0.59 | 0.16 | 2.60E-07 | 0.43  | NA |
| chr10 | 133998912 | 134001500 | RP11-140A10.3 | ENSG00000235010 | -740  | 0.4  | 0.27 | 2.60E-07 | 0.13  | NA |
| chr10 | 15412419  | 15413040  | FAM171A1      | ENSG00000148468 | 329   | 0.44 | 0.22 | 3.20E-07 | 0.23  | NA |
| chr10 | 105420685 | 105421076 | SH3PXD2A      | ENSG00000107957 | 582   | 0.75 | 0.41 | 6.90E-07 | 0.34  | NA |
| chr10 | 106399567 | 106402812 | SORCS3        | ENSG00000156395 | 330   | 0.29 | 0.18 | 7.80E-07 | 0.11  | NA |
| chr10 | 127407627 | 127408566 | RP11-383C5.5  | ENSG00000234134 | -162  | 0.22 | 0.43 | 7.90E-07 | -0.21 | NA |
| chr10 | 27702368  | 27703378  | PTCHD3        | ENSG00000182077 | 424   | 0.76 | 0.52 | 1.10E-06 | 0.24  | NA |

|       |           |           |               |                 |       |      |      |          |       |    |
|-------|-----------|-----------|---------------|-----------------|-------|------|------|----------|-------|----|
| chr10 | 102503913 | 102506146 | PAX2          | ENSG00000075891 | -439  | 0.3  | 0.18 | 1.10E-06 | 0.12  | NA |
| chr10 | 22634000  | 22634862  | SPAG6         | ENSG00000077327 | 32    | 0.33 | 0.21 | 1.50E-06 | 0.12  | NA |
| chr10 | 103588913 | 103589254 | KCNIP2        | ENSG00000120049 | 221   | 0.86 | 0.53 | 1.70E-06 | 0.33  | NA |
| chr10 | 70091055  | 70092573  | HNRNPH3       | ENSG00000096746 | 336   | 0.6  | 0.17 | 2.10E-06 | 0.43  | NA |
| chr10 | 104401821 | 104404968 | TRIM8         | ENSG00000171206 | -858  | 0.33 | 0.21 | 2.10E-06 | 0.12  | NA |
| chr10 | 118500868 | 118502706 | HSPA12A       | ENSG00000165868 | 298   | 0.29 | 0.15 | 2.60E-06 | 0.14  | NA |
| chr10 | 132893428 | 132893688 | RP11-462G8.3  | ENSG00000230098 | 77    | 0.22 | 0.84 | 3.00E-06 | -0.62 | NA |
| chr10 | 120353692 | 120355821 | PRLHR         | ENSG00000119973 | 0     | 0.31 | 0.18 | 4.40E-06 | 0.13  | NA |
| chr10 | 104000254 | 104001741 | PITX3         | ENSG00000107859 | 234   | 0.38 | 0.21 | 5.70E-06 | 0.16  | NA |
| chr10 | 116391466 | 116391827 | ABLIM1        | ENSG00000099204 | 96    | 0.65 | 0.19 | 6.10E-06 | 0.46  | NA |
| chr10 | 94452200  | 94452428  | HHEX          | ENSG00000152804 | 702   | 0.57 | 0.27 | 6.40E-06 | 0.3   | NA |
| chr10 | 102766321 | 102766693 | RP11-108L7.7  | ENSG00000224915 | 1005  | 0.8  | 0.24 | 8.90E-06 | 0.57  | NA |
| chr10 | 122216259 | 122217377 | PPAPDC1A      | ENSG00000203805 | 352   | 0.36 | 0.17 | 9.10E-06 | 0.19  | NA |
| chr10 | 72575513  | 72576302  | SGPL1         | ENSG00000166224 | 190   | 0.36 | 0.13 | 9.40E-06 | 0.23  | NA |
| chr10 | 73846806  | 73848233  | SPOCK2        | ENSG00000107742 | 567   | 0.46 | 0.27 | 9.60E-06 | 0.19  | NA |
| chr10 | 12171225  | 12172038  | SEC61A2       | ENSG00000065665 | -5    | 0.36 | 0.14 | 1.00E-05 | 0.22  | NA |
| chr10 | 134597357 | 134602649 | RP11-288G11.3 | ENSG00000234531 | -1734 | 0.33 | 0.27 | 1.20E-05 | 0.061 | NA |
| chr10 | 135270783 | 135271061 | RP11-108K14.4 | ENSG00000214279 | 965   | 0.72 | 0.99 | 1.20E-05 | -0.27 | NA |
| chr10 | 75633600  | 75634796  | CAMK2G        | ENSG00000148660 | 21    | 0.26 | 0.13 | 1.40E-05 | 0.13  | NA |
| chr10 | 101290625 | 101291178 | RP11-129J12.2 | ENSG00000257582 | 33    | 0.53 | 0.24 | 1.40E-05 | 0.29  | NA |
| chr10 | 102790820 | 102791049 | PDZD7         | ENSG00000186862 | -72   | 0.41 | 0.15 | 1.60E-05 | 0.26  | NA |
| chr10 | 102893660 | 102895059 | TLX1          | ENSG00000107807 | 288   | 0.37 | 0.16 | 1.80E-05 | 0.21  | NA |
| chr10 | 26504383  | 26507434  | GAD2          | ENSG00000136750 | 672   | 0.35 | 0.21 | 2.30E-05 | 0.14  | NA |
| chr10 | 50822350  | 50822666  | CHAT          | ENSG00000070748 | 28    | 0.24 | 0.54 | 2.50E-05 | -0.3  | NA |
| chr10 | 128076155 | 128077482 | ADAM12        | ENSG00000148848 | 206   | 0.37 | 0.23 | 3.10E-05 | 0.14  | NA |
| chr10 | 102789777 | 102789994 | PDZD7         | ENSG00000186862 | 2     | 0.95 | 0.48 | 3.60E-05 | 0.47  | NA |
| chr10 | 135383225 | 135383518 | SPRNP1        | ENSG00000230786 | 91    | 0.81 | 0.47 | 4.30E-05 | 0.34  | NA |
| chr10 | 94526     | 95301     | RP11-631M21.2 | ENSG00000173876 | 296   | 0.99 | 0.76 | 4.90E-05 | 0.23  | NA |
| chr10 | 74033167  | 74034698  | DDIT4         | ENSG00000168209 | 254   | 0.31 | 0.17 | 5.70E-05 | 0.15  | NA |
| chr10 | 35625049  | 35626540  | CCNY          | ENSG00000108100 | 339   | 0.24 | 0.15 | 6.10E-05 | 0.094 | NA |

|       |           |           |               |                 |       |      |      |          |       |    |
|-------|-----------|-----------|---------------|-----------------|-------|------|------|----------|-------|----|
| chr10 | 13043094  | 13043781  | CCDC3         | ENSG00000151468 | 260   | 0.45 | 0.25 | 6.60E-05 | 0.21  | NA |
| chr10 | 32635217  | 32636655  | RP11-135A24.4 | ENSG00000233825 | 509   | 0.34 | 0.22 | 7.20E-05 | 0.12  | NA |
| chr10 | 44879714  | 44882391  | CXCL12        | ENSG00000107562 | -561  | 0.38 | 0.25 | 7.40E-05 | 0.13  | NA |
| chr10 | 124905634 | 124906161 | HMX2          | ENSG00000188816 | -1741 | 0.41 | 0.19 | 7.80E-05 | 0.21  | NA |
| chr10 | 93557970  | 93558699  | RP11-251A15.4 | ENSG00000228701 | -286  | 0.31 | 0.17 | 7.90E-05 | 0.13  | NA |
| chr10 | 83633820  | 83635729  | NRG3          | ENSG00000185737 | -32   | 0.27 | 0.16 | 8.70E-05 | 0.11  | NA |
| chr10 | 43724528  | 43725613  | RASGEF1A      | ENSG00000198915 | 117   | 0.35 | 0.21 | 1.00E-04 | 0.14  | NA |
| chr10 | 28030182  | 28035211  | MKX           | ENSG00000150051 | -406  | 0.28 | 0.21 | 0.00015  | 0.075 | NA |
| chr10 | 124739792 | 124740292 | PSTK          | ENSG00000179988 | 112   | 0.28 | 0.14 | 0.00019  | 0.14  | NA |
| chr10 | 112402953 | 112404328 | RBM20         | ENSG00000203867 | -515  | 0.29 | 0.16 | 0.00021  | 0.13  | NA |
| chr10 | 35103124  | 35105243  | PARD3         | ENSG00000148498 | 66    | 0.32 | 0.22 | 0.00025  | 0.1   | NA |
| chr10 | 125851151 | 125853233 | CHST15        | ENSG00000182022 | -262  | 0.32 | 0.22 | 0.00025  | 0.1   | NA |
| chr10 | 135278716 | 135279116 | RP11-108K14.4 | ENSG00000214279 | 1180  | 0.4  | 0.63 | 0.00025  | -0.23 | NA |
| chr10 | 120938028 | 120938418 | PRDX3         | ENSG00000165672 | 122   | 0.41 | 0.18 | 0.00027  | 0.23  | NA |
| chr10 | 105211950 | 105212306 | CALHM2        | ENSG00000138172 | -84   | 0.9  | 0.52 | 3.00E-04 | 0.38  | NA |
| chr10 | 129705217 | 129706237 | PTPRE         | ENSG00000132334 | 402   | 0.28 | 0.18 | 0.00031  | 0.097 | NA |
| chr10 | 135020618 | 135020932 | KNDC1         | ENSG00000171798 | 9     | 0.79 | 0.95 | 0.00032  | -0.16 | NA |
| chr10 | 81892222  | 81892640  | PLAC9         | ENSG00000189129 | 84    | 0.32 | 0.16 | 0.00033  | 0.16  | NA |
| chr10 | 82116202  | 82117120  | DYDC1         | ENSG00000170788 | -191  | 0.2  | 0.43 | 0.00034  | -0.23 | NA |
| chr10 | 73723711  | 73724770  | CHST3         | ENSG00000122863 | 117   | 0.37 | 0.23 | 0.00035  | 0.13  | NA |
| chr10 | 103329852 | 103330311 | DPCD          | ENSG00000166171 | -236  | 0.46 | 0.15 | 0.00039  | 0.31  | NA |
| chr10 | 126847224 | 126851327 | CTBP2         | ENSG00000175029 | -1990 | 0.38 | 0.28 | 0.00039  | 0.095 | NA |
| chr10 | 94448693  | 94450479  | HHEX          | ENSG00000152804 | -126  | 0.28 | 0.2  | 0.00041  | 0.084 | NA |
| chr10 | 101379708 | 101381445 | SLC25A28      | ENSG00000155287 | -672  | 0.29 | 0.16 | 0.00041  | 0.13  | NA |
| chr10 | 43571939  | 43573434  | RET           | ENSG00000165731 | 211   | 0.22 | 0.14 | 0.00046  | 0.085 | NA |
| chr10 | 60935827  | 60937049  | PHYHIP1L      | ENSG00000165443 | 88    | 0.33 | 0.16 | 0.00048  | 0.17  | NA |
| chr10 | 31607227  | 31610094  | ZEB1          | ENSG00000148516 | 913   | 0.26 | 0.19 | 5.00E-04 | 0.071 | NA |
| chr10 | 72977123  | 72977774  | RP11-790G19.2 | ENSG00000237512 | 134   | 0.45 | 0.15 | 0.00051  | 0.3   | NA |
| chr10 | 101418868 | 101419589 | ENTPD7        | ENSG00000198018 | -35   | 0.34 | 0.18 | 0.00051  | 0.16  | NA |
| chr10 | 135121991 | 135122669 | TUBGCP2       | ENSG00000130640 | 22    | 0.29 | 0.16 | 0.00055  | 0.13  | NA |

|       |           |           |               |                 |       |      |      |         |       |    |
|-------|-----------|-----------|---------------|-----------------|-------|------|------|---------|-------|----|
| chr10 | 119133803 | 119135632 | PDZD8         | ENSG00000165650 | -725  | 0.28 | 0.2  | 0.00062 | 0.085 | NA |
| chr10 | 104952242 | 104953232 | NT5C2         | ENSG00000076685 | 292   | 0.29 | 0.15 | 0.00063 | 0.14  | NA |
| chr10 | 62492785  | 62493376  | ANK3          | ENSG00000151150 | 2     | 0.43 | 0.2  | 0.00068 | 0.23  | NA |
| chr10 | 123686972 | 123688109 | ATE1          | ENSG00000107669 | -124  | 0.31 | 0.2  | 0.00073 | 0.11  | NA |
| chr10 | 99609425  | 99610116  | RP11-459F3.3  | ENSG00000227356 | -235  | 0.38 | 0.2  | 0.00074 | 0.18  | NA |
| chr10 | 94050423  | 94051412  | CPEB3         | ENSG00000107864 | -73   | 0.3  | 0.14 | 0.00082 | 0.15  | NA |
| chr10 | 99093406  | 99094955  | RP11-452K12.4 | ENSG00000225850 | -141  | 0.29 | 0.17 | 0.00085 | 0.12  | NA |
| chr10 | 135138682 | 135139717 | CALY          | ENSG00000130643 | 480   | 0.37 | 0.19 | 0.00091 | 0.18  | NA |
| chr10 | 96305116  | 96305893  | HELLS         | ENSG00000119969 | -43   | 0.39 | 0.16 | 0.001   | 0.23  | NA |
| chr10 | 43047584  | 43048472  | ZNF37BP       | ENSG00000234420 | 214   | 0.34 | 0.15 | 0.0011  | 0.19  | NA |
| chr10 | 94820026  | 94823252  | RP11-348J12.2 | ENSG00000226425 | -1456 | 0.72 | 0.64 | 0.0011  | 0.081 | NA |
| chr10 | 99185778  | 99186294  | AL355490.1    | ENSG00000224474 | -205  | 0.31 | 0.14 | 0.0011  | 0.16  | NA |
| chr10 | 120839592 | 120840480 | EIF3A         | ENSG00000107581 | -5    | 0.32 | 0.19 | 0.0011  | 0.13  | NA |
| chr10 | 134350302 | 134351119 | INPP5A        | ENSG00000068383 | -614  | 0.34 | 0.15 | 0.0012  | 0.19  | NA |
| chr10 | 48964083  | 48964976  | RP11-508M1.9  | ENSG00000213686 | 1348  | 0.98 | 0.78 | 0.0013  | 0.2   | NA |
| chr10 | 121301478 | 121303169 | RGS10         | ENSG00000148908 | -103  | 0.28 | 0.19 | 0.0014  | 0.087 | NA |
| chr10 | 126106818 | 126107862 | OAT           | ENSG00000065154 | 165   | 0.24 | 0.15 | 0.0014  | 0.094 | NA |
| chr10 | 94608037  | 94609039  | EXOC6         | ENSG00000138190 | 296   | 0.34 | 0.2  | 0.0015  | 0.14  | NA |
| chr10 | 118429430 | 118429853 | C10orf82      | ENSG00000165863 | -171  | 0.59 | 0.3  | 0.0015  | 0.29  | NA |
| chr10 | 6242975   | 6246457   | RP11-414H17.5 | ENSG00000213994 | -60   | 0.28 | 0.21 | 0.0016  | 0.068 | NA |
| chr10 | 76969992  | 76971002  | VDAC2         | ENSG00000165637 | 94    | 0.3  | 0.16 | 0.0016  | 0.14  | NA |
| chr10 | 102899177 | 102899489 | RP11-31L23.3  | ENSG00000226740 | 135   | 0.8  | 0.38 | 0.0016  | 0.41  | NA |
| chr10 | 119494493 | 119494991 | RP11-328K15.1 | ENSG00000234952 | -82   | 0.44 | 0.26 | 0.0016  | 0.18  | NA |
| chr10 | 101491680 | 101492232 | COX15         | ENSG00000014919 | -99   | 0.31 | 0.15 | 0.0017  | 0.15  | NA |
| chr10 | 105036628 | 105038084 | AL360001.1    | ENSG00000244967 | -605  | 0.32 | 0.19 | 0.0017  | 0.12  | NA |
| chr10 | 121631654 | 121633104 | MCMBP         | ENSG00000197771 | -113  | 0.3  | 0.19 | 0.0017  | 0.11  | NA |
| chr10 | 64564435  | 64565818  | ADO           | ENSG00000181915 | 610   | 0.24 | 0.15 | 0.0018  | 0.091 | NA |
| chr10 | 75545264  | 75546124  | KIAA0913      | ENSG00000214655 | 311   | 0.25 | 0.15 | 0.0019  | 0.093 | NA |
| chr10 | 88122924  | 88127364  | GRID1         | ENSG00000182771 | 1091  | 0.24 | 0.3  | 0.002   | -0.06 | NA |
| chr10 | 13203436  | 13203790  | MCM10         | ENSG00000065328 | 59    | 0.34 | 0.19 | 0.0023  | 0.15  | NA |

|       |           |           |               |                 |       |      |      |        |       |    |
|-------|-----------|-----------|---------------|-----------------|-------|------|------|--------|-------|----|
| chr10 | 72141560  | 72142637  | LRRC20        | ENSG00000172731 | -428  | 0.36 | 0.17 | 0.0023 | 0.18  | NA |
| chr10 | 126150243 | 126150740 | LHPP          | ENSG00000107902 | 88    | 0.2  | 0.11 | 0.0026 | 0.087 | NA |
| chr10 | 131934520 | 131935324 | GLRX3         | ENSG00000108010 | 259   | 0.27 | 0.16 | 0.0027 | 0.12  | NA |
| chr10 | 80827070  | 80830537  | RP11-202P11.1 | ENSG00000224596 | -1578 | 0.27 | 0.2  | 0.0028 | 0.068 | NA |
| chr10 | 25011963  | 25013816  | ARHGAP21      | ENSG00000107863 | -720  | 0.26 | 0.16 | 0.003  | 0.1   | NA |
| chr10 | 23002155  | 23003790  | PIP4K2A       | ENSG00000150867 | 65    | 0.22 | 0.14 | 0.0031 | 0.076 | NA |
| chr10 | 50323184  | 50323735  | C10orf72      | ENSG00000165633 | 95    | 0.31 | 0.18 | 0.0032 | 0.13  | NA |
| chr10 | 79396095  | 79398495  | KCNMA1        | ENSG00000156113 | -90   | 0.29 | 0.21 | 0.0032 | 0.086 | NA |
| chr10 | 88391746  | 88392242  | RPL7AP8       | ENSG00000230507 | -609  | 0.43 | 0.23 | 0.0032 | 0.2   | NA |
| chr10 | 60094731  | 60095306  | UBE2D1        | ENSG00000072401 | 283   | 0.26 | 0.14 | 0.0033 | 0.12  | NA |
| chr10 | 97802871  | 97804262  | CCNJ          | ENSG00000107443 | 415   | 0.25 | 0.17 | 0.0033 | 0.084 | NA |
| chr10 | 75570928  | 75571809  | NDST2         | ENSG00000166507 | -26   | 0.38 | 0.22 | 0.0035 | 0.16  | NA |
| chr10 | 77054582  | 77054929  | RP11-399K21.6 | ENSG00000226051 | -1386 | 0.39 | 0.16 | 0.0038 | 0.23  | NA |
| chr10 | 135191594 | 135193307 | PAOX          | ENSG00000148832 | -245  | 0.28 | 0.18 | 0.0039 | 0.095 | NA |
| chr10 | 70939896  | 70940304  | SUPV3L1       | ENSG00000156502 | 112   | 0.15 | 0.29 | 0.004  | -0.15 | NA |
| chr10 | 90750293  | 90751108  | FAS           | ENSG00000026103 | 286   | 0.28 | 0.16 | 0.004  | 0.12  | NA |
| chr10 | 6018944   | 6020073   | IL15RA        | ENSG00000134470 | -331  | 0.23 | 0.16 | 0.0041 | 0.075 | NA |
| chr10 | 104677315 | 104679312 | CNNM2         | ENSG00000148842 | 242   | 0.27 | 0.2  | 0.0041 | 0.071 | NA |
| chr10 | 44788811  | 44789120  | RP11-20J15.3  | ENSG00000229116 | 192   | 1    | 0.78 | 0.0044 | 0.22  | NA |
| chr10 | 75489947  | 75490554  | RP11-464F9.1  | ENSG00000242288 | -26   | 0.25 | 0.13 | 0.0045 | 0.12  | NA |
| chr10 | 52382472  | 52385155  | SGMS1         | ENSG00000198964 | -70   | 0.25 | 0.17 | 0.0046 | 0.076 | NA |
| chr10 | 126431314 | 126433285 | FAM53B        | ENSG00000189319 | -760  | 0.27 | 0.19 | 0.0047 | 0.075 | NA |
| chr10 | 73156164  | 73157954  | CDH23         | ENSG00000107736 | 368   | 0.27 | 0.2  | 0.0048 | 0.074 | NA |
| chr10 | 15138965  | 15139851  | RPP38         | ENSG00000152464 | 229   | 0.27 | 0.17 | 0.0049 | 0.1   | NA |
| chr10 | 135018677 | 135019084 | KNDC1         | ENSG00000171798 | -1886 | 0.71 | 0.89 | 0.0053 | -0.18 | NA |
| chr10 | 75012126  | 75012531  | MRPS16        | ENSG00000182180 | -166  | 0.23 | 0.11 | 0.0056 | 0.12  | NA |
| chr10 | 101824961 | 101825186 | CPN1          | ENSG00000120054 | 78    | 0.73 | 0.17 | 0.0056 | 0.56  | NA |
| chr10 | 72163717  | 72164573  | EIF4EBP2      | ENSG00000148730 | 10    | 0.24 | 0.16 | 0.0057 | 0.086 | NA |
| chr10 | 105726687 | 105727255 | SLK           | ENSG00000065613 | 12    | 0.32 | 0.09 | 0.0059 | 0.23  | NA |
| chr10 | 21805879  | 21806630  | C10orf140     | ENSG00000180592 | 594   | 0.23 | 0.14 | 0.0061 | 0.082 | NA |



|       |           |           |               |                 |       |      |      |        |       |    |
|-------|-----------|-----------|---------------|-----------------|-------|------|------|--------|-------|----|
| chr10 | 69834413  | 69835233  | HERC4         | ENSG00000148634 | -209  | 0.27 | 0.17 | 0.0061 | 0.096 | NA |
| chr10 | 100028204 | 100028508 | LOXL4         | ENSG00000138131 | -349  | 0.57 | 0.21 | 0.0061 | 0.37  | NA |
| chr10 | 106097595 | 106098556 | ITPRIP        | ENSG00000148841 | 87    | 0.35 | 0.23 | 0.0061 | 0.12  | NA |
| chr10 | 14879769  | 14881041  | CDNF          | ENSG00000185267 | -484  | 0.32 | 0.24 | 0.0065 | 0.086 | NA |
| chr10 | 88515426  | 88517217  | BMPR1A        | ENSG00000107779 | -75   | 0.26 | 0.2  | 0.007  | 0.069 | NA |
| chr10 | 48438411  | 48439320  | GDF10         | ENSG00000107623 | 111   | 0.33 | 0.21 | 0.0071 | 0.12  | NA |
| chr10 | 104153729 | 104155557 | NFKB2         | ENSG00000077150 | 414   | 0.26 | 0.19 | 0.0071 | 0.073 | NA |
| chr10 | 28287447  | 28288057  | ARMC4         | ENSG00000169126 | 225   | 0.25 | 0.14 | 0.0073 | 0.11  | NA |
| chr10 | 91404237  | 91405048  | PANK1         | ENSG00000152782 | 330   | 0.33 | 0.15 | 0.0073 | 0.19  | NA |
| chr10 | 88022640  | 88023279  | MIR346        | ENSG00000199104 | 1586  | 0.27 | 0.67 | 0.0075 | -0.39 | NA |
| chr10 | 26986142  | 26987088  | PDSS1         | ENSG00000148459 | 27    | 0.28 | 0.2  | 0.008  | 0.081 | NA |
| chr10 | 31892189  | 31892752  | RP11-472N13.2 | ENSG00000223834 | -1058 | 0.35 | 0.2  | 0.008  | 0.15  | NA |
| chr10 | 30722378  | 30723707  | MAP3K8        | ENSG00000107968 | 176   | 0.24 | 0.16 | 0.0082 | 0.081 | NA |
| chr10 | 70166206  | 70167342  | RUFY2         | ENSG00000204130 | -67   | 0.3  | 0.19 | 0.0083 | 0.11  | NA |
| chr10 | 75936217  | 75936726  | ADK           | ENSG00000156110 | 27    | 0.1  | 1    | 0.0083 | -0.9  | NA |
| chr10 | 104614000 | 104614326 | C10orf32      | ENSG00000166275 | 144   | 0.17 | 0.42 | 0.0086 | -0.25 | NA |
| chr10 | 977260    | 978072    | LARP4B        | ENSG00000107929 | -250  | 0.3  | 0.19 | 0.0087 | 0.11  | NA |
| chr10 | 114712115 | 114712544 | RP11-57H14.2  | ENSG00000233547 | -695  | 0.41 | 0.24 | 0.0089 | 0.17  | NA |
| chr10 | 54170771  | 54170978  | PRKRIRP3      | ENSG00000227972 | -21   | 0.94 | 0.65 | 0.0091 | 0.29  | NA |
| chr10 | 27793049  | 27793764  | RAB18         | ENSG00000099246 | 209   | 0.21 | 0.11 | 0.0092 | 0.1   | NA |
| chr10 | 42971195  | 42971834  | RP11-178A10.1 | ENSG00000185904 | 438   | 0.32 | 0.2  | 0.0092 | 0.12  | NA |
| chr10 | 42972752  | 42972953  | RP11-178A10.1 | ENSG00000185904 | 1776  | 0.49 | 0.8  | 0.0094 | -0.31 | NA |
| chr10 | 134120447 | 134122422 | STK32C        | ENSG00000165752 | -716  | 0.26 | 0.2  | 0.0098 | 0.066 | NA |
| chr10 | 135450883 | 135451867 | XX-2136C111.2 | ENSG00000213543 | 21    | 0.75 | 0.53 | 0.011  | 0.22  | NA |
| chr10 | 6186520   | 6187855   | PFKFB3        | ENSG00000170525 | 306   | 0.26 | 0.18 | 0.012  | 0.086 | NA |
| chr10 | 65280870  | 65282030  | REEP3         | ENSG00000165476 | 327   | 0.22 | 0.37 | 0.012  | -0.15 | NA |
| chr10 | 90967555  | 90967900  | CH25H         | ENSG00000138135 | -656  | 0.35 | 0.19 | 0.012  | 0.16  | NA |
| chr10 | 38265075  | 38265723  | ZNF25         | ENSG00000175395 | 121   | 0.27 | 0.18 | 0.013  | 0.089 | NA |
| chr10 | 118927021 | 118928132 | RP11-501J20.2 | ENSG00000234474 | 990   | 0.25 | 0.17 | 0.013  | 0.085 | NA |
| chr10 | 12390802  | 12392589  | CAMK1D        | ENSG00000183049 | 214   | 0.25 | 0.19 | 0.014  | 0.059 | NA |

|       |           |           |               |                 |       |      |      |       |       |    |
|-------|-----------|-----------|---------------|-----------------|-------|------|------|-------|-------|----|
| chr10 | 64574660  | 64578778  | EGR2          | ENSG00000122877 | -604  | 0.23 | 0.18 | 0.014 | 0.048 | NA |
| chr10 | 97453478  | 97454013  | TCTN3         | ENSG00000119977 | -150  | 0.32 | 0.15 | 0.014 | 0.17  | NA |
| chr10 | 113943283 | 113943657 | GPAM          | ENSG00000119927 | -2    | 0.42 | 0.24 | 0.014 | 0.19  | NA |
| chr10 | 5454431   | 5454779   | NET1          | ENSG00000173848 | 91    | 0.28 | 0.16 | 0.015 | 0.12  | NA |
| chr10 | 13698562  | 13699540  | FRMD4A        | ENSG00000151474 | -268  | 0.98 | 0.91 | 0.015 | 0.078 | NA |
| chr10 | 65224870  | 65225887  | JMJD1C        | ENSG00000171988 | 263   | 0.23 | 0.16 | 0.015 | 0.071 | NA |
| chr10 | 71331926  | 71333392  | NEUROG3       | ENSG00000122859 | 335   | 0.25 | 0.18 | 0.015 | 0.068 | NA |
| chr10 | 75910836  | 75911480  | ADK           | ENSG00000156110 | 198   | 0.3  | 0.13 | 0.015 | 0.17  | NA |
| chr10 | 43891546  | 43892917  | HNRNPF        | ENSG00000169813 | 34    | 0.3  | 0.2  | 0.016 | 0.098 | NA |
| chr10 | 74855858  | 74856985  | P4HA1         | ENSG00000122884 | 187   | 0.23 | 0.14 | 0.016 | 0.094 | NA |
| chr10 | 81585357  | 81586971  | RP11-773D16.1 | ENSG00000225484 | -626  | 0.31 | 0.53 | 0.016 | -0.22 | NA |
| chr10 | 86088395  | 86088791  | FAM190B       | ENSG00000107771 | 174   | 0.45 | 0.2  | 0.016 | 0.24  | NA |
| chr10 | 118764228 | 118765146 | KIAA1598      | ENSG00000187164 | 189   | 0.27 | 0.18 | 0.016 | 0.084 | NA |
| chr10 | 135043221 | 135044560 | UTF1          | ENSG00000171794 | 112   | 0.29 | 0.21 | 0.016 | 0.079 | NA |
| chr10 | 11059442  | 11060524  | CELF2         | ENSG00000048740 | 90    | 0.25 | 0.18 | 0.017 | 0.07  | NA |
| chr10 | 4868125   | 4868949   | AKR1E2        | ENSG00000165568 | 168   | 0.31 | 0.19 | 0.018 | 0.13  | NA |
| chr10 | 5930914   | 5932389   | ANKRD16       | ENSG00000134461 | -330  | 0.28 | 0.21 | 0.018 | 0.07  | NA |
| chr10 | 6130786   | 6131774   | RBM17         | ENSG00000134453 | 331   | 0.3  | 0.19 | 0.018 | 0.12  | NA |
| chr10 | 104159096 | 104159536 | NFKB2         | ENSG00000077150 | -1019 | 0.25 | 0.13 | 0.018 | 0.12  | NA |
| chr10 | 20104451  | 20106105  | PLXDC2        | ENSG00000120594 | 110   | 0.23 | 0.15 | 0.019 | 0.075 | NA |
| chr10 | 104263676 | 104264155 | SUFU          | ENSG00000107882 | 171   | 0.27 | 0.55 | 0.019 | -0.28 | NA |
| chr10 | 127511329 | 127512197 | UROS          | ENSG00000188690 | -105  | 0.24 | 0.14 | 0.019 | 0.095 | NA |
| chr10 | 23480697  | 23482455  | PTF1A         | ENSG00000168267 | 320   | 0.29 | 0.22 | 0.02  | 0.078 | NA |
| chr10 | 92980347  | 92980832  | PCGF5         | ENSG00000180628 | 49    | 0.24 | 0.13 | 0.02  | 0.11  | NA |
| chr10 | 103892659 | 103893590 | PPRC1         | ENSG00000148840 | 337   | 0.24 | 0.15 | 0.02  | 0.092 | NA |
| chr10 | 71812318  | 71813693  | H2AFY2        | ENSG00000099284 | 453   | 0.33 | 0.25 | 0.021 | 0.079 | NA |
| chr10 | 115803358 | 115805468 | ADRB1         | ENSG00000043591 | 607   | 0.34 | 0.25 | 0.021 | 0.088 | NA |
| chr10 | 133058338 | 133058609 | TCERG1L       | ENSG00000176769 | 126   | 0.99 | 0.89 | 0.021 | 0.097 | NA |
| chr10 | 135089969 | 135090491 | ADAM8         | ENSG00000151651 | 130   | 0.36 | 0.23 | 0.021 | 0.13  | NA |
| chr10 | 26222921  | 26224022  | MYO3A         | ENSG00000095777 | 275   | 0.25 | 0.18 | 0.022 | 0.068 | NA |

|       |           |           |               |                 |      |      |      |       |        |    |
|-------|-----------|-----------|---------------|-----------------|------|------|------|-------|--------|----|
| chr10 | 134504420 | 134505591 | INPP5A        | ENSG00000068383 | 1109 | 0.98 | 0.92 | 0.022 | 0.063  | NA |
| chr10 | 79793494  | 79793952  | RPS24         | ENSG00000138326 | 205  | 0.22 | 0.42 | 0.024 | -0.21  | NA |
| chr10 | 99400263  | 99400982  | PI4K2A        | ENSG00000155252 | 179  | 0.23 | 0.13 | 0.024 | 0.11   | NA |
| chr10 | 126605120 | 126606212 | RP11-298J20.4 | ENSG00000249456 | -46  | 0.21 | 0.14 | 0.024 | 0.072  | NA |
| chr10 | 111985563 | 111986204 | MXI1          | ENSG00000119950 | 132  | 0.22 | 0.14 | 0.026 | 0.083  | NA |
| chr10 | 124913631 | 124914726 | BUB3          | ENSG00000154473 | 385  | 0.25 | 0.34 | 0.026 | -0.094 | NA |
| chr10 | 54073989  | 54074827  | DKK1          | ENSG00000107984 | 352  | 0.42 | 0.27 | 0.027 | 0.16   | NA |
| chr10 | 17270430  | 17272617  | VIM           | ENSG00000026025 | 1009 | 0.26 | 0.2  | 0.028 | 0.068  | NA |
| chr10 | 98945062  | 98946239  | SLIT1         | ENSG00000187122 | -270 | 0.33 | 0.45 | 0.028 | -0.12  | NA |
| chr10 | 45938626  | 45939679  | ALOX5         | ENSG00000012779 | 462  | 1    | 0.97 | 0.029 | 0.026  | NA |
| chr10 | 1102144   | 1103341   | WDR37         | ENSG00000047056 | 398  | 0.28 | 0.18 | 0.03  | 0.093  | NA |
| chr10 | 75173411  | 75173950  | ANXA7         | ENSG00000138279 | 136  | 0.29 | 0.18 | 0.03  | 0.11   | NA |
| chr10 | 27541297  | 27541883  | RP11-85G18.4  | ENSG00000230445 | -868 | 0.65 | 0.47 | 0.031 | 0.18   | NA |
| chr10 | 43902580  | 43904792  | HNRNPF        | ENSG00000169813 | -419 | 0.23 | 0.18 | 0.032 | 0.047  | NA |
| chr10 | 98479725  | 98480487  | PIK3AP1       | ENSG00000155629 | 165  | 0.11 | 0.28 | 0.032 | -0.17  | NA |
| chr10 | 123922850 | 123923542 | TACC2         | ENSG00000138162 | 255  | 0.38 | 0.24 | 0.032 | 0.14   | NA |
| chr10 | 129534410 | 129537366 | AL391005.1    | ENSG00000188722 | -919 | 0.23 | 0.18 | 0.032 | 0.05   | NA |
| chr10 | 104473399 | 104474711 | ARL3          | ENSG00000138175 | 109  | 0.23 | 0.42 | 0.035 | -0.19  | NA |
| chr10 | 116163391 | 116164599 | AFAP1L2       | ENSG00000169129 | 244  | 0.27 | 0.2  | 0.035 | 0.071  | NA |
| chr10 | 135186693 | 135187181 | ECHS1         | ENSG00000127884 | 256  | 0.3  | 0.16 | 0.035 | 0.15   | NA |
| chr10 | 22614275  | 22614934  | BMI1          | ENSG00000168283 | 29   | 0.44 | 0.26 | 0.036 | 0.19   | NA |
| chr10 | 32217353  | 32218392  | ARHGAP12      | ENSG00000165322 | -144 | 0.24 | 0.17 | 0.036 | 0.075  | NA |
| chr10 | 104168558 | 104169153 | PSD           | ENSG00000059915 | 192  | 0.29 | 0.11 | 0.037 | 0.18   | NA |
| chr10 | 38893386  | 38894333  | ABCD1P2       | ENSG00000215151 | -690 | 0.83 | 0.73 | 0.038 | 0.094  | NA |
| chr10 | 103535636 | 103536505 | FGF8          | ENSG00000107831 | -413 | 0.34 | 0.25 | 0.038 | 0.085  | NA |
| chr10 | 85954199  | 85955303  | CDHR1         | ENSG00000148600 | 341  | 0.31 | 0.17 | 0.039 | 0.14   | NA |
| chr10 | 89264370  | 89265371  | MINPP1        | ENSG00000107789 | 238  | 0.23 | 0.17 | 0.039 | 0.064  | NA |
| chr10 | 93683430  | 93683839  | BTAF1         | ENSG00000095564 | -188 | 0.2  | 0.12 | 0.04  | 0.078  | NA |
| chr10 | 99789614  | 99791320  | CRTAC1        | ENSG00000095713 | 118  | 0.19 | 0.24 | 0.04  | -0.056 | NA |
| chr10 | 44143856  | 44144698  | ZNF32         | ENSG00000169740 | -132 | 0.33 | 0.2  | 0.041 | 0.13   | NA |

|       |           |           |               |                 |      |      |      |       |        |    |
|-------|-----------|-----------|---------------|-----------------|------|------|------|-------|--------|----|
| chr10 | 17658665  | 17659639  | PTPLA         | ENSG00000165996 | 82   | 0.27 | 0.18 | 0.042 | 0.094  | NA |
| chr10 | 81964681  | 81965558  | ANXA11        | ENSG00000122359 | 154  | 0.32 | 0.22 | 0.042 | 0.098  | NA |
| chr10 | 15761423  | 15762101  | ITGA8         | ENSG00000077943 | 8    | 0.27 | 0.19 | 0.043 | 0.078  | NA |
| chr10 | 32216901  | 32217102  | ARHGAP12      | ENSG00000165322 | 727  | 0.18 | 0.48 | 0.047 | -0.3   | NA |
| chr10 | 47254936  | 47256041  | RP11-144G6.9  | ENSG00000215065 | 1241 | 0.88 | 0.5  | 0.048 | 0.38   | NA |
| chr10 | 96943195  | 96943737  | RP11-310E22.2 | ENSG00000225533 | 56   | 0.25 | 0.16 | 0.049 | 0.093  | NA |
| chr10 | 135333722 | 135334062 | CYP2E1        | ENSG00000130649 | -18  | 0.42 | 0.14 | 0.05  | 0.27   | NA |
| chr10 | 134016043 | 134016344 | DPYSL4        | ENSG00000151640 | -864 | 0.87 | 0.95 | 0.052 | -0.075 | NA |
| chr10 | 734707    | 735606    | DIP2C         | ENSG00000151240 | 450  | 0.3  | 0.19 | 0.053 | 0.11   | NA |
| chr10 | 25241110  | 25241900  | PRTFDC1       | ENSG00000099256 | 8    | 0.19 | 0.26 | 0.053 | -0.075 | NA |
| chr10 | 72200065  | 72201368  | NODAL         | ENSG00000156574 | 707  | 0.25 | 0.31 | 0.053 | -0.053 | NA |
| chr10 | 72432242  | 72432738  | ADAMTS14      | ENSG00000138316 | -69  | 0.22 | 0.13 | 0.054 | 0.092  | NA |
| chr10 | 13570128  | 13570864  | RP11-214D15.2 | ENSG00000227175 | -20  | 0.23 | 0.12 | 0.055 | 0.1    | NA |
| chr10 | 134973510 | 134974311 | KNDC1         | ENSG00000171798 | -41  | 0.22 | 0.15 | 0.056 | 0.069  | NA |
| chr10 | 128993505 | 128995167 | FAM196A       | ENSG00000188916 | 86   | 0.25 | 0.2  | 0.057 | 0.056  | NA |
| chr10 | 52499392  | 52500021  | ASAH2B        | ENSG00000204147 | 10   | 0.2  | 0.14 | 0.06  | 0.06   | NA |
| chr10 | 62761163  | 62761595  | RHOBTB1       | ENSG00000072422 | -181 | 0.3  | 0.18 | 0.06  | 0.12   | NA |
| chr10 | 135378883 | 135379767 | SYCE1         | ENSG00000171772 | -238 | 0.76 | 0.68 | 0.06  | 0.079  | NA |
| chr10 | 89101402  | 89103018  | RP11-322M19.1 | ENSG00000223482 | -166 | 0.38 | 0.15 | 0.061 | 0.24   | NA |
| chr10 | 64133789  | 64134420  | ZNF365        | ENSG00000138311 | 153  | 0.28 | 0.18 | 0.062 | 0.094  | NA |
| chr10 | 45868718  | 45870156  | ALOX5         | ENSG00000012779 | -224 | 0.26 | 0.18 | 0.066 | 0.076  | NA |
| chr10 | 76993892  | 76995953  | COMTD1        | ENSG00000165644 | 172  | 0.24 | 0.2  | 0.066 | 0.045  | NA |
| chr10 | 102825929 | 102827693 | KAZALD1       | ENSG00000107821 | 755  | 0.28 | 0.21 | 0.066 | 0.066  | NA |
| chr10 | 105217966 | 105218287 | CALHM1        | ENSG00000185933 | 519  | 0.91 | 0.82 | 0.066 | 0.088  | NA |
| chr10 | 120966127 | 120967623 | GRK5          | ENSG00000198873 | -226 | 0.24 | 0.2  | 0.067 | 0.048  | NA |
| chr10 | 111682775 | 111683483 | XPNPEP1       | ENSG00000108039 | -272 | 0.24 | 0.33 | 0.068 | -0.09  | NA |
| chr10 | 118885565 | 118885884 | KIAA1598      | ENSG00000187164 | 373  | 0.92 | 0.81 | 0.068 | 0.11   | NA |
| chr10 | 82213556  | 82214760  | TSPAN14       | ENSG00000108219 | 236  | 0.18 | 0.23 | 0.07  | -0.052 | NA |
| chr10 | 120863620 | 120864216 | FAM45A        | ENSG00000119979 | 289  | 0.21 | 0.14 | 0.07  | 0.076  | NA |
| chr10 | 103454126 | 103454478 | FBXW4         | ENSG00000107829 | 168  | 0.2  | 0.12 | 0.072 | 0.077  | NA |

|       |           |           |               |                 |       |      |      |       |        |    |
|-------|-----------|-----------|---------------|-----------------|-------|------|------|-------|--------|----|
| chr10 | 72043446  | 72043886  | NPFFR1        | ENSG00000148734 | -226  | 0.23 | 0.15 | 0.074 | 0.078  | NA |
| chr10 | 115439007 | 115440196 | CASP7         | ENSG00000165806 | 175   | 0.2  | 0.29 | 0.075 | -0.088 | NA |
| chr10 | 94180315  | 94180754  | AL161652.2    | ENSG00000256759 | -187  | 0.38 | 0.51 | 0.076 | -0.13  | NA |
| chr10 | 74113815  | 74114792  | DNAJB12       | ENSG00000148719 | -165  | 0.28 | 0.21 | 0.078 | 0.07   | NA |
| chr10 | 102046142 | 102046632 | BLOC1S2       | ENSG00000196072 | 50    | 0.27 | 0.18 | 0.078 | 0.098  | NA |
| chr10 | 12084236  | 12085431  | UPF2          | ENSG00000151461 | 0     | 0.31 | 0.21 | 0.08  | 0.095  | NA |
| chr10 | 22292300  | 22292897  | DNAJC1        | ENSG00000136770 | -270  | 0.27 | 0.16 | 0.08  | 0.1    | NA |
| chr10 | 14645752  | 14646705  | FAM107B       | ENSG00000065809 | 41    | 0.29 | 0.19 | 0.081 | 0.097  | NA |
| chr10 | 74451828  | 74452597  | CCDC109A      | ENSG00000156026 | 323   | 0.38 | 0.28 | 0.081 | 0.099  | NA |
| chr10 | 102672367 | 102673159 | FAM178A       | ENSG00000119906 | 43    | 0.28 | 0.2  | 0.082 | 0.078  | NA |
| chr10 | 102891010 | 102891794 | TLX1          | ENSG00000107807 | -83   | 0.26 | 0.18 | 0.083 | 0.085  | NA |
| chr10 | 13344235  | 13344498  | PHYH          | ENSG00000107537 | 46    | 0.27 | 0.17 | 0.084 | 0.1    | NA |
| chr10 | 7449376   | 7455339   | SFMBT2        | ENSG00000198879 | -1650 | 0.25 | 0.22 | 0.086 | 0.033  | NA |
| chr10 | 38691424  | 38692162  | SEPT7L        | ENSG00000120555 | -272  | 0.26 | 0.18 | 0.087 | 0.079  | NA |
| chr10 | 43632966  | 43634222  | CSGALNACT2    | ENSG00000169826 | -340  | 0.23 | 0.18 | 0.088 | 0.054  | NA |
| chr10 | 95326229  | 95327108  | O3FAR1        | ENSG00000186188 | 246   | 0.18 | 0.29 | 0.088 | -0.11  | NA |
| chr10 | 129923813 | 129924962 | MKI67         | ENSG00000148773 | -456  | 0.34 | 0.24 | 0.09  | 0.1    | NA |
| chr10 | 6621907   | 6622642   | PRKCQ         | ENSG00000065675 | -73   | 0.21 | 0.15 | 0.091 | 0.064  | NA |
| chr10 | 134778683 | 134779073 | RP13-137A17.4 | ENSG00000232903 | -85   | 1    | 0.91 | 0.091 | 0.091  | NA |
| chr10 | 111767087 | 111768355 | ADD3          | ENSG00000148700 | 1     | 0.27 | 0.21 | 0.093 | 0.064  | NA |
| chr10 | 134755663 | 134756852 | C10orf93      | ENSG00000171811 | -210  | 0.29 | 0.35 | 0.094 | -0.065 | NA |
| chr10 | 60027007  | 60029241  | IPMK          | ENSG00000151151 | -430  | 0.26 | 0.21 | 0.095 | 0.048  | NA |
| chr10 | 106014667 | 106015087 | GSTO1         | ENSG00000148834 | 133   | 0.28 | 0.21 | 0.096 | 0.076  | NA |
| chr10 | 106074965 | 106075368 | ITPRIP        | ENSG00000148841 | -1527 | 1    | 0.95 | 0.098 | 0.052  | NA |
| chr10 | 71211116  | 71211780  | TSPAN15       | ENSG00000099282 | 219   | 0.39 | 0.25 | 0.099 | 0.14   | NA |
| chr10 | 121485063 | 121485319 | INPP5F        | ENSG00000198825 | -418  | 0.17 | 0.33 | 0.099 | -0.16  | NA |
| chr10 | 49731448  | 49732638  | ARHGAP22      | ENSG00000128805 | 238   | 0.19 | 0.15 | 0.1   | 0.045  | NA |
| chr10 | 70480704  | 70481598  | CCAR1         | ENSG00000060339 | 382   | 0.24 | 0.32 | 0.1   | -0.08  | NA |
| chr10 | 91174405  | 91175166  | IFIT5         | ENSG00000152778 | 266   | 0.27 | 0.19 | 0.1   | 0.077  | NA |
| chr10 | 99446696  | 99447400  | AVPI1         | ENSG00000119986 | 32    | 0.25 | 0.18 | 0.1   | 0.067  | NA |

|       |           |           |               |                 |       |      |      |      |        |    |
|-------|-----------|-----------|---------------|-----------------|-------|------|------|------|--------|----|
| chr10 | 1033790   | 1034615   | AL359878.1    | ENSG00000205740 | 79    | 0.23 | 0.18 | 0.11 | 0.053  | NA |
| chr10 | 11652834  | 11653962  | AL512631.1    | ENSG00000249107 | 267   | 0.23 | 0.17 | 0.11 | 0.069  | NA |
| chr10 | 15130386  | 15130913  | ACBD7         | ENSG00000176244 | -169  | 0.29 | 0.22 | 0.11 | 0.074  | NA |
| chr10 | 16859089  | 16859975  | RSU1          | ENSG00000148484 | -150  | 0.32 | 0.46 | 0.11 | -0.14  | NA |
| chr10 | 25463756  | 25465639  | GPR158        | ENSG00000151025 | 706   | 0.26 | 0.22 | 0.11 | 0.038  | NA |
| chr10 | 33623120  | 33626197  | NRP1          | ENSG00000099250 | -1348 | 0.26 | 0.21 | 0.11 | 0.047  | NA |
| chr10 | 46222416  | 46223287  | FAM21C        | ENSG00000172661 | 203   | 0.27 | 0.21 | 0.11 | 0.064  | NA |
| chr10 | 53459251  | 53459759  | CSTF2T        | ENSG00000177613 | -150  | 0.28 | 0.2  | 0.11 | 0.079  | NA |
| chr10 | 63422538  | 63423105  | C10orf107     | ENSG00000183346 | 102   | 0.25 | 0.14 | 0.11 | 0.11   | NA |
| chr10 | 97050185  | 97051124  | PDLIM1        | ENSG00000107438 | 115   | 0.28 | 0.2  | 0.11 | 0.072  | NA |
| chr10 | 102106182 | 102107722 | SCD           | ENSG00000099194 | 75    | 0.26 | 0.21 | 0.11 | 0.052  | NA |
| chr10 | 102792042 | 102792266 | SFXN3         | ENSG00000107819 | 1158  | 0.37 | 0.18 | 0.11 | 0.19   | NA |
| chr10 | 106028542 | 106029047 | GSTO2         | ENSG00000065621 | 163   | 0.32 | 0.2  | 0.11 | 0.12   | NA |
| chr10 | 106034574 | 106034803 | GSTO2         | ENSG00000065621 | 39    | 0.31 | 0.13 | 0.11 | 0.17   | NA |
| chr10 | 135170645 | 135171954 | C10orf125     | ENSG00000148803 | -58   | 0.32 | 0.25 | 0.11 | 0.067  | NA |
| chr10 | 1094337   | 1095594   | IDI1          | ENSG00000067064 | -628  | 0.23 | 0.18 | 0.12 | 0.047  | NA |
| chr10 | 21822850  | 21824410  | MLLT10        | ENSG00000078403 | 536   | 0.19 | 0.15 | 0.12 | 0.044  | NA |
| chr10 | 71561302  | 71562876  | COL13A1       | ENSG00000197467 | 445   | 0.21 | 0.26 | 0.12 | -0.046 | NA |
| chr10 | 75757484  | 75758227  | VCL           | ENSG00000035403 | -17   | 0.18 | 0.13 | 0.12 | 0.054  | NA |
| chr10 | 102756834 | 102759798 | LZTS2         | ENSG00000107816 | 1445  | 0.24 | 0.2  | 0.12 | 0.044  | NA |
| chr10 | 104180478 | 104182042 | FBXL15        | ENSG00000107872 | 662   | 0.27 | 0.22 | 0.12 | 0.05   | NA |
| chr10 | 116697893 | 116698376 | TRUB1         | ENSG00000165832 | 182   | 0.48 | 0.2  | 0.12 | 0.27   | NA |
| chr10 | 96162023  | 96163327  | TBC1D12       | ENSG00000108239 | 414   | 0.2  | 0.28 | 0.13 | -0.078 | NA |
| chr10 | 105677555 | 105678040 | OBFC1         | ENSG00000107960 | 91    | 0.33 | 0.2  | 0.13 | 0.13   | NA |
| chr10 | 124907283 | 124911035 | HMX2          | ENSG00000188816 | 1521  | 0.26 | 0.23 | 0.13 | 0.033  | NA |
| chr10 | 15902079  | 15902402  | FAM188A       | ENSG00000148481 | 257   | 0.31 | 0.19 | 0.14 | 0.13   | NA |
| chr10 | 21462128  | 21463808  | NEBL          | ENSG00000078114 | -201  | 0.2  | 0.24 | 0.14 | -0.042 | NA |
| chr10 | 43697777  | 43698177  | RASGEF1A      | ENSG00000198915 | 153   | 0.24 | 0.47 | 0.14 | -0.23  | NA |
| chr10 | 70660525  | 70661473  | DDX50         | ENSG00000107625 | -35   | 0.2  | 0.27 | 0.14 | -0.071 | NA |
| chr10 | 103070291 | 103070504 | RP11-107114.2 | ENSG00000225208 | -378  | 0.2  | 0.4  | 0.14 | -0.2   | NA |

|       |           |           |               |                 |       |      |      |      |        |    |
|-------|-----------|-----------|---------------|-----------------|-------|------|------|------|--------|----|
| chr10 | 103990213 | 103991829 | PITX3         | ENSG00000107859 | 819   | 0.25 | 0.21 | 0.14 | 0.04   | NA |
| chr10 | 133794406 | 133794637 | BNIP3         | ENSG00000176171 | 906   | 0.6  | 0.19 | 0.14 | 0.41   | NA |
| chr10 | 27149166  | 27150229  | ABI1          | ENSG00000136754 | 95    | 0.31 | 0.22 | 0.15 | 0.084  | NA |
| chr10 | 38383200  | 38383962  | ZNF37A        | ENSG00000075407 | 317   | 0.5  | 1    | 0.15 | -0.5   | NA |
| chr10 | 47083341  | 47083633  | PPYR1         | ENSG00000204174 | -47   | 0.23 | 0.41 | 0.15 | -0.18  | NA |
| chr10 | 79789138  | 79789441  | POLR3A        | ENSG00000148606 | -11   | 0.15 | 0.25 | 0.15 | -0.099 | NA |
| chr10 | 88728039  | 88728720  | C10orf116     | ENSG00000148671 | 190   | 0.29 | 0.22 | 0.15 | 0.077  | NA |
| chr10 | 43837787  | 43838144  | U6atac        | ENSG00000221468 | 731   | 0.93 | 0.86 | 0.16 | 0.075  | NA |
| chr10 | 120513949 | 120515108 | C10orf46      | ENSG00000151893 | -539  | 0.24 | 0.18 | 0.16 | 0.061  | NA |
| chr10 | 124713268 | 124714249 | C10orf88      | ENSG00000119965 | 69    | 0.3  | 0.23 | 0.16 | 0.066  | NA |
| chr10 | 125425495 | 125426642 | GPR26         | ENSG00000154478 | 197   | 0.22 | 0.27 | 0.16 | -0.045 | NA |
| chr10 | 135453951 | 135454528 | AGGF1P2       | ENSG00000233435 | -1351 | 0.15 | 0.28 | 0.16 | -0.13  | NA |
| chr10 | 28957408  | 28958116  | U6            | ENSG00000207483 | 914   | 0.29 | 0.39 | 0.17 | -0.095 | NA |
| chr10 | 104005139 | 104005592 | GBF1          | ENSG00000107862 | 76    | 0.23 | 0.32 | 0.17 | -0.09  | NA |
| chr10 | 3826853   | 3828126   | KLF6          | ENSG00000067082 | -114  | 0.27 | 0.23 | 0.18 | 0.038  | NA |
| chr10 | 5854706   | 5855965   | GDI2          | ENSG00000057608 | 15    | 0.29 | 0.25 | 0.18 | 0.041  | NA |
| chr10 | 15001272  | 15001840  | MEIG1         | ENSG00000197889 | 118   | 0.19 | 0.14 | 0.18 | 0.057  | NA |
| chr10 | 73975671  | 73976115  | ASCC1         | ENSG00000138303 | -199  | 0.33 | 0.12 | 0.18 | 0.21   | NA |
| chr10 | 75255033  | 75255808  | RP11-137L10.6 | ENSG00000221817 | 137   | 0.28 | 0.23 | 0.18 | 0.048  | NA |
| chr10 | 97320424  | 97321483  | SORBS1        | ENSG00000095637 | 177   | 0.18 | 0.22 | 0.18 | -0.045 | NA |
| chr10 | 119805825 | 119806544 | RAB11FIP2     | ENSG00000107560 | -70   | 0.4  | 0.29 | 0.18 | 0.11   | NA |
| chr10 | 124134088 | 124134933 | PLEKHA1       | ENSG00000107679 | 337   | 0.21 | 0.26 | 0.18 | -0.047 | NA |
| chr10 | 98346049  | 98347064  | TM9SF3        | ENSG00000077147 | -40   | 0.26 | 0.21 | 0.19 | 0.049  | NA |
| chr10 | 69990893  | 69991523  | ATOH7         | ENSG00000179774 | 663   | 0.22 | 0.17 | 0.2  | 0.05   | NA |
| chr10 | 71892092  | 71892802  | AIFM2         | ENSG00000042286 | 121   | 0.25 | 0.21 | 0.2  | 0.041  | NA |
| chr10 | 71905215  | 71906675  | TYSND1        | ENSG00000156521 | 397   | 0.26 | 0.21 | 0.2  | 0.046  | NA |
| chr10 | 72972075  | 72973895  | UNC5B         | ENSG00000107731 | 658   | 0.21 | 0.18 | 0.2  | 0.033  | NA |
| chr10 | 94333247  | 94334467  | IDE           | ENSG00000119912 | -33   | 0.24 | 0.19 | 0.2  | 0.047  | NA |
| chr10 | 105110265 | 105111008 | PCGF6         | ENSG00000156374 | 47    | 0.2  | 0.14 | 0.2  | 0.057  | NA |
| chr10 | 23727836  | 23729523  | OTUD1         | ENSG00000165312 | 481   | 0.21 | 0.17 | 0.21 | 0.034  | NA |

|       |           |           |               |                 |      |      |      |      |        |    |
|-------|-----------|-----------|---------------|-----------------|------|------|------|------|--------|----|
| chr10 | 81743127  | 81743547  | RP11-479O17.7 | ENSG00000225100 | -341 | 0.68 | 0.83 | 0.21 | -0.15  | NA |
| chr10 | 35415788  | 35416685  | CREM          | ENSG00000095794 | 435  | 0.22 | 0.17 | 0.22 | 0.049  | NA |
| chr10 | 134145177 | 134146025 | STK32C        | ENSG00000165752 | -275 | 0.33 | 0.46 | 0.22 | -0.13  | NA |
| chr10 | 7829588   | 7830517   | KIN           | ENSG00000151657 | -108 | 0.35 | 0.46 | 0.23 | -0.11  | NA |
| chr10 | 97849568  | 97850095  | RP11-429G19.2 | ENSG00000226688 | 81   | 0.22 | 0.17 | 0.23 | 0.042  | NA |
| chr10 | 133794898 | 133796598 | BNIP3         | ENSG00000176171 | -321 | 0.23 | 0.2  | 0.23 | 0.031  | NA |
| chr10 | 43600146  | 43601165  | RET           | ENSG00000165731 | 475  | 0.23 | 0.19 | 0.24 | 0.039  | NA |
| chr10 | 45455239  | 45455474  | RASSF4        | ENSG00000107551 | 116  | 0.5  | 0.17 | 0.24 | 0.33   | NA |
| chr10 | 81838359  | 81839078  | C10orf57      | ENSG00000133678 | 316  | 0.23 | 0.32 | 0.24 | -0.091 | NA |
| chr10 | 94833272  | 94835256  | CYP26A1       | ENSG00000095596 | 617  | 0.27 | 0.22 | 0.24 | 0.045  | NA |
| chr10 | 101945571 | 101945907 | ERLIN1        | ENSG00000107566 | 47   | 0.2  | 0.12 | 0.24 | 0.082  | NA |
| chr10 | 30637961  | 30638279  | MTPAP         | ENSG00000107951 | -30  | 0.26 | 0.12 | 0.25 | 0.14   | NA |
| chr10 | 52833539  | 52834752  | PRKG1         | ENSG00000185532 | 211  | 0.28 | 0.22 | 0.25 | 0.058  | NA |
| chr10 | 75118205  | 75118679  | TTC18         | ENSG00000156042 | 9    | 0.19 | 0.27 | 0.25 | -0.081 | NA |
| chr10 | 98272207  | 98273939  | TLL2          | ENSG00000095587 | 595  | 0.26 | 0.3  | 0.25 | -0.041 | NA |
| chr10 | 112835990 | 112839303 | ADRA2A        | ENSG00000150594 | 856  | 0.42 | 0.39 | 0.25 | 0.027  | NA |
| chr10 | 115614373 | 115615056 | NHLRC2        | ENSG00000196865 | 294  | 0.19 | 0.24 | 0.25 | -0.053 | NA |
| chr10 | 133793426 | 133793647 | BNIP3         | ENSG00000176171 | 1891 | 0.45 | 0.36 | 0.25 | 0.094  | NA |
| chr10 | 30347599  | 30348416  | KIAA1462      | ENSG00000165757 | 446  | 0.18 | 0.14 | 0.26 | 0.042  | NA |
| chr10 | 76584625  | 76586746  | MYST4         | ENSG00000156650 | 345  | 0.23 | 0.19 | 0.26 | 0.036  | NA |
| chr10 | 88730554  | 88731632  | AGAP11        | ENSG00000151303 | 595  | 0.64 | 0.58 | 0.26 | 0.056  | NA |
| chr10 | 101287162 | 101287920 | RP11-129J12.2 | ENSG00000257582 | -341 | 0.69 | 0.55 | 0.26 | 0.14   | NA |
| chr10 | 51827416  | 51828287  | RP11-324H6.5  | ENSG00000235618 | -288 | 0.18 | 0.23 | 0.27 | -0.049 | NA |
| chr10 | 11784407  | 11784937  | ECHDC3        | ENSG00000134463 | 227  | 0.34 | 0.29 | 0.28 | 0.051  | NA |
| chr10 | 58121059  | 58121275  | ZWINT         | ENSG00000122952 | -131 | 0.14 | 0.26 | 0.28 | -0.12  | NA |
| chr10 | 64892879  | 64893336  | NRBF2         | ENSG00000148572 | 57   | 0.21 | 0.14 | 0.28 | 0.067  | NA |
| chr10 | 70715938  | 70716494  | DDX21         | ENSG00000165732 | 287  | 0.22 | 0.18 | 0.28 | 0.042  | NA |
| chr10 | 71389862  | 71390355  | C10orf35      | ENSG00000171224 | 101  | 0.29 | 0.2  | 0.28 | 0.088  | NA |
| chr10 | 73078857  | 73079181  | SLC29A3       | ENSG00000198246 | 4    | 0.35 | 0.22 | 0.28 | 0.12   | NA |
| chr10 | 94352667  | 94353159  | KIF11         | ENSG00000138160 | -130 | 0.24 | 0.18 | 0.28 | 0.06   | NA |



|       |           |           |               |                 |       |      |      |      |        |    |
|-------|-----------|-----------|---------------|-----------------|-------|------|------|------|--------|----|
| chr10 | 95653641  | 95654181  | TMEM20        | ENSG00000176273 | 181   | 0.23 | 0.18 | 0.28 | 0.053  | NA |
| chr10 | 108923780 | 108924805 | SORCS1        | ENSG00000108018 | -8    | 0.21 | 0.17 | 0.28 | 0.036  | NA |
| chr10 | 126135809 | 126138896 | NKX1-2        | ENSG00000229544 | 1198  | 0.27 | 0.29 | 0.28 | -0.029 | NA |
| chr10 | 135148196 | 135150565 | CALY          | ENSG00000130643 | 996   | 0.25 | 0.28 | 0.28 | -0.032 | NA |
| chr10 | 12110700  | 12111303  | DHTKD1        | ENSG00000181192 | 30    | 0.22 | 0.18 | 0.29 | 0.045  | NA |
| chr10 | 46167677  | 46168642  | ANUBL1        | ENSG00000172671 | -437  | 0.21 | 0.17 | 0.29 | 0.044  | NA |
| chr10 | 70231396  | 70231797  | DNA2          | ENSG00000138346 | 47    | 0.21 | 0.14 | 0.29 | 0.072  | NA |
| chr10 | 70586917  | 70588209  | STOX1         | ENSG00000165730 | 265   | 0.29 | 0.23 | 0.29 | 0.064  | NA |
| chr10 | 73610661  | 73611145  | PSAP          | ENSG00000197746 | 103   | 0.27 | 0.4  | 0.29 | -0.13  | NA |
| chr10 | 97667243  | 97667978  | RP11-429G19.2 | ENSG00000226688 | -78   | 0.14 | 0.18 | 0.29 | -0.043 | NA |
| chr10 | 30024072  | 30026077  | SVIL          | ENSG00000197321 | -344  | 0.21 | 0.18 | 0.3  | 0.025  | NA |
| chr10 | 81205001  | 81205811  | ZCCHC24       | ENSG00000165424 | -23   | 0.17 | 0.23 | 0.3  | -0.061 | NA |
| chr10 | 91460899  | 91461615  | RP11-80H5.4   | ENSG00000235100 | -80   | 0.21 | 0.38 | 0.3  | -0.17  | NA |
| chr10 | 118899247 | 118900329 | VAX1          | ENSG00000148704 | -1976 | 0.47 | 0.41 | 0.3  | 0.06   | NA |
| chr10 | 123356616 | 123358285 | FGFR2         | ENSG00000066468 | 136   | 0.22 | 0.19 | 0.3  | 0.032  | NA |
| chr10 | 17495407  | 17496721  | ST8SIA6       | ENSG00000148488 | 265   | 0.21 | 0.18 | 0.31 | 0.029  | NA |
| chr10 | 103879633 | 103880628 | LDB1          | ENSG00000198728 | 75    | 0.35 | 0.27 | 0.31 | 0.085  | NA |
| chr10 | 116581522 | 116582434 | FAM160B1      | ENSG00000151553 | 449   | 0.19 | 0.23 | 0.31 | -0.038 | NA |
| chr10 | 121652003 | 121652507 | SEC23IP       | ENSG00000107651 | 32    | 0.17 | 0.26 | 0.31 | -0.091 | NA |
| chr10 | 11911554  | 11912432  | C10orf47      | ENSG00000148426 | 350   | 0.39 | 0.33 | 0.32 | 0.059  | NA |
| chr10 | 18948113  | 18948711  | RP11-139J15.2 | ENSG00000152487 | -245  | 0.19 | 0.16 | 0.32 | 0.029  | NA |
| chr10 | 74385467  | 74386041  | CBARA1        | ENSG00000107745 | 83    | 0.27 | 0.35 | 0.32 | -0.087 | NA |
| chr10 | 95753347  | 95754201  | PLCE1         | ENSG00000138193 | 28    | 0.21 | 0.25 | 0.32 | -0.041 | NA |
| chr10 | 32344550  | 32345570  | KIF5B         | ENSG00000170759 | 299   | 0.17 | 0.2  | 0.33 | -0.029 | NA |
| chr10 | 37414145  | 37414769  | ANKRD30A      | ENSG00000148513 | -328  | 0.88 | 0.92 | 0.33 | -0.034 | NA |
| chr10 | 52750956  | 52751765  | PRKG1         | ENSG00000185532 | 242   | 0.21 | 0.14 | 0.33 | 0.07   | NA |
| chr10 | 70748435  | 70749334  | KIAA1279      | ENSG00000198954 | 397   | 0.18 | 0.22 | 0.33 | -0.044 | NA |
| chr10 | 71930007  | 71930587  | SAR1A         | ENSG00000079332 | -69   | 0.28 | 0.21 | 0.33 | 0.071  | NA |
| chr10 | 75503973  | 75504222  | SEC24C        | ENSG00000176986 | -23   | 0.32 | 0.24 | 0.33 | 0.079  | NA |
| chr10 | 91011325  | 91011864  | LIPA          | ENSG00000107798 | -62   | 0.33 | 0.52 | 0.33 | -0.19  | NA |

|       |           |           |               |                 |      |      |      |      |        |    |
|-------|-----------|-----------|---------------|-----------------|------|------|------|------|--------|----|
| chr10 | 102279162 | 102279730 | SEC31B        | ENSG00000075826 | 145  | 0.26 | 0.21 | 0.33 | 0.048  | NA |
| chr10 | 114206604 | 114207320 | ZDHHC6        | ENSG00000023041 | -303 | 0.26 | 0.22 | 0.33 | 0.035  | NA |
| chr10 | 180582    | 182452    | ZMYND11       | ENSG00000015171 | 874  | 0.25 | 0.22 | 0.34 | 0.028  | NA |
| chr10 | 14920320  | 14921688  | SUV39H2       | ENSG00000152455 | 185  | 0.21 | 0.18 | 0.35 | 0.027  | NA |
| chr10 | 120924785 | 120925558 | SFXN4         | ENSG00000183605 | -117 | 0.24 | 0.2  | 0.35 | 0.036  | NA |
| chr10 | 60272467  | 60273456  | BICC1         | ENSG00000122870 | 61   | 0.3  | 0.23 | 0.36 | 0.071  | NA |
| chr10 | 124578126 | 124578443 | RP11-107C16.2 | ENSG00000176584 | -48  | 0.38 | 0.33 | 0.36 | 0.05   | NA |
| chr10 | 27443030  | 27443405  | YME1L1        | ENSG00000136758 | -62  | 0.19 | 0.28 | 0.37 | -0.089 | NA |
| chr10 | 35378834  | 35379632  | CUL2          | ENSG00000108094 | -270 | 0.35 | 0.28 | 0.37 | 0.066  | NA |
| chr10 | 43931958  | 43932879  | ZNF487P       | ENSG00000243660 | 136  | 0.18 | 0.15 | 0.37 | 0.038  | NA |
| chr10 | 44069359  | 44070179  | ZNF239        | ENSG00000196793 | 263  | 0.19 | 0.15 | 0.37 | 0.038  | NA |
| chr10 | 50817095  | 50817309  | CHAT          | ENSG00000070748 | 61   | 0.18 | 0.33 | 0.37 | -0.15  | NA |
| chr10 | 73533091  | 73533492  | C10orf54      | ENSG00000107738 | -36  | 0.26 | 0.19 | 0.37 | 0.066  | NA |
| chr10 | 99392786  | 99393375  | MORN4         | ENSG00000171160 | 157  | 0.23 | 0.17 | 0.37 | 0.055  | NA |
| chr10 | 102729299 | 102729710 | SEMA4G        | ENSG00000095539 | 214  | 0.18 | 0.24 | 0.37 | -0.055 | NA |
| chr10 | 115933379 | 115934262 | C10orf118     | ENSG00000165813 | 86   | 0.24 | 0.29 | 0.37 | -0.05  | NA |
| chr10 | 23983366  | 23984978  | KIAA1217      | ENSG00000120549 | 497  | 0.27 | 0.23 | 0.38 | 0.04   | NA |
| chr10 | 71331449  | 71331691  | NEUROG3       | ENSG00000122859 | 1424 | 0.36 | 0.26 | 0.38 | 0.097  | NA |
| chr10 | 102133021 | 102133557 | NCRNA00263    | ENSG00000235823 | -83  | 0.3  | 0.24 | 0.38 | 0.065  | NA |
| chr10 | 43133523  | 43134150  | ZNF33B        | ENSG00000196693 | 133  | 0.26 | 0.37 | 0.39 | -0.11  | NA |
| chr10 | 69644169  | 69645178  | SIRT1         | ENSG00000096717 | 246  | 0.2  | 0.17 | 0.39 | 0.036  | NA |
| chr10 | 124220338 | 124222240 | HTRA1         | ENSG00000166033 | 248  | 0.28 | 0.25 | 0.39 | 0.036  | NA |
| chr10 | 76871055  | 76871620  | SAMD8         | ENSG00000156671 | 108  | 0.32 | 0.26 | 0.4  | 0.06   | NA |
| chr10 | 81664389  | 81665076  | MBL1P         | ENSG00000242600 | 78   | 0.15 | 0.19 | 0.4  | -0.036 | NA |
| chr10 | 102748870 | 102749088 | C10orf2       | ENSG00000107815 | 1196 | 0.88 | 0.73 | 0.4  | 0.15   | NA |
| chr10 | 71077946  | 71079377  | HK1           | ENSG00000156515 | 61   | 0.21 | 0.19 | 0.41 | 0.023  | NA |
| chr10 | 85899058  | 85899640  | GHITM         | ENSG00000165678 | 153  | 0.37 | 0.29 | 0.41 | 0.081  | NA |
| chr10 | 102746533 | 102747501 | MRPL43        | ENSG00000055950 | -64  | 0.2  | 0.23 | 0.41 | -0.037 | NA |
| chr10 | 112678307 | 112679894 | BBIP1         | ENSG00000214413 | -185 | 0.24 | 0.28 | 0.41 | -0.04  | NA |
| chr10 | 134901198 | 134902619 | GPR123        | ENSG00000197177 | 499  | 0.25 | 0.22 | 0.41 | 0.032  | NA |

|       |           |           |               |                 |      |      |      |      |        |    |
|-------|-----------|-----------|---------------|-----------------|------|------|------|------|--------|----|
| chr10 | 13628789  | 13629266  | PRPF18        | ENSG00000165630 | 100  | 0.34 | 0.41 | 0.42 | -0.073 | NA |
| chr10 | 89621772  | 89624128  | KLLN          | ENSG00000227268 | -706 | 0.27 | 0.31 | 0.42 | -0.04  | NA |
| chr10 | 135236687 | 135238237 | SPRN          | ENSG00000203772 | 614  | 0.35 | 0.24 | 0.43 | 0.12   | NA |
| chr10 | 28821189  | 28823092  | RP11-164A7.1  | ENSG00000254635 | -857 | 0.26 | 0.24 | 0.44 | 0.023  | NA |
| chr10 | 112064137 | 112064859 | SMNDC1        | ENSG00000119953 | -43  | 0.19 | 0.23 | 0.45 | -0.042 | NA |
| chr10 | 64028041  | 64028706  | RTKN2         | ENSG00000182010 | 93   | 0.27 | 0.19 | 0.46 | 0.078  | NA |
| chr10 | 103911696 | 103912546 | NOLC1         | ENSG00000166197 | 188  | 0.32 | 0.24 | 0.47 | 0.082  | NA |
| chr10 | 104262224 | 104262524 | ACTR1A        | ENSG00000138107 | 37   | 0.23 | 0.18 | 0.47 | 0.047  | NA |
| chr10 | 112631414 | 112632476 | PDCD4         | ENSG00000150593 | 380  | 0.25 | 0.21 | 0.47 | 0.035  | NA |
| chr10 | 82168064  | 82168917  | C10orf58      | ENSG00000122378 | 241  | 0.2  | 0.23 | 0.49 | -0.028 | NA |
| chr10 | 105128002 | 105128463 | TAF5          | ENSG00000148835 | 508  | 0.24 | 0.19 | 0.49 | 0.047  | NA |
| chr10 | 105991899 | 105992248 | WDR96         | ENSG00000197748 | -10  | 0.35 | 0.28 | 0.49 | 0.073  | NA |
| chr10 | 5540785   | 5541515   | CALML5        | ENSG00000178372 | 383  | 0.94 | 0.91 | 0.5  | 0.028  | NA |
| chr10 | 81204452  | 81204790  | ZCCHC24       | ENSG00000165424 | -646 | 0.37 | 0.47 | 0.5  | -0.1   | NA |
| chr10 | 99473520  | 99474664  | MARVELD1      | ENSG00000155254 | -359 | 0.2  | 0.24 | 0.5  | -0.042 | NA |
| chr10 | 31320483  | 31321553  | ZNF438        | ENSG00000183621 | -234 | 0.22 | 0.25 | 0.51 | -0.036 | NA |
| chr10 | 71992414  | 71993467  | PPA1          | ENSG00000180817 | 153  | 0.23 | 0.2  | 0.51 | 0.03   | NA |
| chr10 | 7860261   | 7861107   | TAF3          | ENSG00000165632 | 217  | 0.24 | 0.2  | 0.52 | 0.042  | NA |
| chr10 | 22604907  | 22605632  | COMMD3        | ENSG00000148444 | -45  | 0.33 | 0.39 | 0.53 | -0.06  | NA |
| chr10 | 61122306  | 61122536  | FAM13C        | ENSG00000148541 | -113 | 0.17 | 0.13 | 0.53 | 0.039  | NA |
| chr10 | 43277849  | 43278532  | BMS1          | ENSG00000165733 | -59  | 0.28 | 0.31 | 0.54 | -0.034 | NA |
| chr10 | 97415860  | 97416726  | ALDH18A1      | ENSG00000059573 | 73   | 0.2  | 0.23 | 0.54 | -0.023 | NA |
| chr10 | 122739052 | 122739391 | RP11-95116.2  | ENSG00000227307 | 992  | 0.25 | 0.3  | 0.54 | -0.046 | NA |
| chr10 | 38299490  | 38300099  | ZNF33A        | ENSG00000189180 | 216  | 0.24 | 0.28 | 0.55 | -0.039 | NA |
| chr10 | 103113523 | 103114414 | BTRC          | ENSG00000166167 | 148  | 0.18 | 0.15 | 0.55 | 0.027  | NA |
| chr10 | 103603166 | 103603642 | KCNIP2        | ENSG00000120049 | -79  | 0.22 | 0.26 | 0.55 | -0.041 | NA |
| chr10 | 131908731 | 131909886 | RP11-500G10.1 | ENSG00000237489 | -227 | 0.18 | 0.2  | 0.55 | -0.025 | NA |
| chr10 | 27530938  | 27531363  | ACBD5         | ENSG00000107897 | -133 | 0.25 | 0.21 | 0.56 | 0.041  | NA |
| chr10 | 48354459  | 48355197  | ZNF488        | ENSG00000165388 | -196 | 0.39 | 0.3  | 0.56 | 0.091  | NA |
| chr10 | 89419346  | 89420027  | PAPSS2        | ENSG00000198682 | 316  | 0.23 | 0.26 | 0.56 | -0.027 | NA |

|       |           |           |               |                 |       |      |      |      |        |    |
|-------|-----------|-----------|---------------|-----------------|-------|------|------|------|--------|----|
| chr10 | 122610678 | 122611052 | WDR11         | ENSG00000120008 | 170   | 0.11 | 0.17 | 0.56 | -0.058 | NA |
| chr10 | 127464156 | 127464385 | MMP21         | ENSG00000154485 | 120   | 0.96 | 0.93 | 0.56 | 0.034  | NA |
| chr10 | 135048797 | 135052077 | VENTX         | ENSG00000151650 | -971  | 0.25 | 0.24 | 0.56 | 0.012  | NA |
| chr10 | 6262647   | 6262871   | PFKFB3        | ENSG00000170525 | -608  | 0.93 | 0.95 | 0.58 | -0.022 | NA |
| chr10 | 88280635  | 88282089  | WAPAL         | ENSG00000062650 | 125   | 0.21 | 0.23 | 0.58 | -0.019 | NA |
| chr10 | 15209824  | 15210714  | NMT2          | ENSG00000152465 | 176   | 0.18 | 0.16 | 0.59 | 0.019  | NA |
| chr10 | 26855906  | 26856198  | AL160287.1    | ENSG00000246873 | -214  | 0.34 | 0.28 | 0.59 | 0.067  | NA |
| chr10 | 42644821  | 42646412  | AL031601.3    | ENSG00000229485 | -619  | 0.66 | 0.68 | 0.59 | -0.021 | NA |
| chr10 | 97889636  | 97890412  | ZNF518A       | ENSG00000177853 | 368   | 0.24 | 0.21 | 0.59 | 0.025  | NA |
| chr10 | 133109193 | 133111052 | TCERG1L       | ENSG00000176769 | -138  | 0.24 | 0.23 | 0.59 | 0.016  | NA |
| chr10 | 99205476  | 99206274  | EXOSC1        | ENSG00000171311 | -285  | 0.18 | 0.16 | 0.6  | 0.021  | NA |
| chr10 | 124894075 | 124897366 | HMX3          | ENSG00000188620 | 242   | 0.23 | 0.22 | 0.6  | 0.011  | NA |
| chr10 | 135044780 | 135044992 | UTF1          | ENSG00000171794 | 1108  | 0.4  | 0.2  | 0.6  | 0.2    | NA |
| chr10 | 98591707  | 98593273  | LCOR          | ENSG00000196233 | 473   | 0.19 | 0.18 | 0.61 | 0.014  | NA |
| chr10 | 103985852 | 103986246 | ELOVL3        | ENSG00000119915 | -36   | 0.27 | 0.18 | 0.61 | 0.09   | NA |
| chr10 | 134774213 | 134774485 | RP13-137A17.5 | ENSG00000224758 | 1392  | 0.89 | 1    | 0.61 | -0.11  | NA |
| chr10 | 18940528  | 18940765  | NSUN6         | ENSG00000241058 | -95   | 0.27 | 0.24 | 0.62 | 0.036  | NA |
| chr10 | 45496275  | 45496550  | C10orf25      | ENSG00000165511 | -76   | 0.17 | 0.2  | 0.63 | -0.027 | NA |
| chr10 | 94831512  | 94832312  | CYP26A1       | ENSG00000095596 | -1320 | 0.18 | 0.16 | 0.63 | 0.024  | NA |
| chr10 | 112257163 | 112258684 | DUSP5         | ENSG00000138166 | 327   | 0.19 | 0.21 | 0.63 | -0.017 | NA |
| chr10 | 23982382  | 23982589  | KIAA1217      | ENSG00000120549 | -1190 | 0.24 | 0.2  | 0.64 | 0.039  | NA |
| chr10 | 49812852  | 49813352  | ARHGAP22      | ENSG00000128805 | -105  | 0.27 | 0.38 | 0.64 | -0.11  | NA |
| chr10 | 49863620  | 49864601  | ARHGAP22      | ENSG00000128805 | 200   | 0.25 | 0.21 | 0.64 | 0.038  | NA |
| chr10 | 75670696  | 75671379  | PLAU          | ENSG00000122861 | 175   | 0.32 | 0.27 | 0.64 | 0.048  | NA |
| chr10 | 13341377  | 13342223  | PHYH          | ENSG00000107537 | -251  | 0.24 | 0.21 | 0.65 | 0.023  | NA |
| chr10 | 105614511 | 105615456 | SH3PXD2A      | ENSG00000107957 | 181   | 0.21 | 0.24 | 0.65 | -0.033 | NA |
| chr10 | 3214721   | 3215260   | PITRM1        | ENSG00000107959 | -16   | 0.38 | 0.32 | 0.66 | 0.057  | NA |
| chr10 | 49514331  | 49515400  | MAPK8         | ENSG00000107643 | 167   | 0.21 | 0.24 | 0.66 | -0.026 | NA |
| chr10 | 70286960  | 70287396  | SLC25A16      | ENSG00000122912 | -5    | 0.2  | 0.17 | 0.66 | 0.028  | NA |
| chr10 | 105155820 | 105156484 | USMG5         | ENSG00000173915 | -321  | 0.26 | 0.29 | 0.66 | -0.031 | NA |

|       |           |           |               |                 |       |      |      |      |         |    |
|-------|-----------|-----------|---------------|-----------------|-------|------|------|------|---------|----|
| chr10 | 105452338 | 105453230 | SH3PXD2A      | ENSG00000107957 | 146   | 0.22 | 0.25 | 0.67 | -0.023  | NA |
| chr10 | 3108650   | 3111419   | PFKP          | ENSG00000067057 | 322   | 0.27 | 0.26 | 0.68 | 0.01    | NA |
| chr10 | 105315007 | 105315244 | NEURL         | ENSG00000107954 | -12   | 0.28 | 0.24 | 0.68 | 0.041   | NA |
| chr10 | 115999008 | 115999603 | VWA2          | ENSG00000165816 | 216   | 0.24 | 0.21 | 0.68 | 0.033   | NA |
| chr10 | 12237832  | 12238377  | NUDT5         | ENSG00000165609 | -260  | 0.38 | 0.41 | 0.69 | -0.028  | NA |
| chr10 | 50746634  | 50747329  | ERCC6         | ENSG00000225830 | 91    | 0.21 | 0.19 | 0.69 | 0.027   | NA |
| chr10 | 126480092 | 126480810 | FAM53B        | ENSG00000189319 | -155  | 0.22 | 0.2  | 0.69 | 0.028   | NA |
| chr10 | 50969658  | 50970605  | OGDHL         | ENSG00000197444 | 238   | 0.28 | 0.23 | 0.7  | 0.049   | NA |
| chr10 | 81741228  | 81742293  | RP11-479O17.8 | ENSG00000235924 | 165   | 0.21 | 0.18 | 0.7  | 0.022   | NA |
| chr10 | 21805197  | 21805459  | C10orf140     | ENSG00000180592 | 1520  | 0.19 | 0.26 | 0.71 | -0.072  | NA |
| chr10 | 38146502  | 38147104  | ZNF248        | ENSG00000198105 | -265  | 0.29 | 0.2  | 0.72 | 0.088   | NA |
| chr10 | 90342528  | 90343221  | RNLS          | ENSG00000184719 | 73    | 0.21 | 0.19 | 0.72 | 0.02    | NA |
| chr10 | 99894265  | 99894914  | C10orf28      | ENSG00000166024 | 202   | 0.26 | 0.22 | 0.72 | 0.039   | NA |
| chr10 | 111967428 | 111970723 | MXI1          | ENSG00000119950 | 1633  | 0.22 | 0.23 | 0.72 | -0.012  | NA |
| chr10 | 101190451 | 101190925 | RP11-441O15.3 | ENSG00000224934 | -260  | 0.22 | 0.2  | 0.73 | 0.019   | NA |
| chr10 | 61468610  | 61469999  | SLC16A9       | ENSG00000165449 | -24   | 0.21 | 0.23 | 0.74 | -0.013  | NA |
| chr10 | 79685719  | 79686507  | DLG5          | ENSG00000151208 | 171   | 0.21 | 0.24 | 0.74 | -0.021  | NA |
| chr10 | 120101564 | 120101937 | C10orf84      | ENSG00000165669 | 2     | 0.26 | 0.3  | 0.74 | -0.043  | NA |
| chr10 | 11936169  | 11937060  | RP11-401F24.4 | ENSG00000225778 | 85    | 0.95 | 0.96 | 0.75 | -0.012  | NA |
| chr10 | 102778604 | 102778922 | PDZD7         | ENSG00000186862 | -137  | 0.25 | 0.24 | 0.75 | 0.016   | NA |
| chr10 | 21814786  | 21815716  | C10orf140     | ENSG00000180592 | -640  | 0.22 | 0.2  | 0.78 | 0.021   | NA |
| chr10 | 50887565  | 50887862  | C10orf53      | ENSG00000178645 | 16    | 0.62 | 0.5  | 0.78 | 0.12    | NA |
| chr10 | 5726455   | 5727697   | C10orf18      | ENSG00000108021 | 275   | 0.19 | 0.2  | 0.79 | -0.011  | NA |
| chr10 | 50602989  | 50606783  | DRGX          | ENSG00000165606 | -900  | 0.28 | 0.29 | 0.8  | -0.0086 | NA |
| chr10 | 72360255  | 72360605  | PRF1          | ENSG00000180644 | -1593 | 0.95 | 1    | 0.8  | -0.045  | NA |
| chr10 | 104220983 | 104221287 | TMEM180       | ENSG00000138111 | -14   | 0.16 | 0.19 | 0.8  | -0.023  | NA |
| chr10 | 135381534 | 135383032 | SYCE1         | ENSG00000171772 | -488  | 0.96 | 0.98 | 0.8  | -0.015  | NA |
| chr10 | 5707980   | 5708798   | ASB13         | ENSG00000196372 | 152   | 0.32 | 0.3  | 0.81 | 0.027   | NA |
| chr10 | 27389075  | 27389622  | ANKRD26       | ENSG00000107890 | -28   | 0.18 | 0.21 | 0.81 | -0.028  | NA |
| chr10 | 63212495  | 63213009  | TMEM26        | ENSG00000196932 | 173   | 0.18 | 0.2  | 0.81 | -0.019  | NA |

|       |           |           |               |                 |      |      |      |      |         |    |
|-------|-----------|-----------|---------------|-----------------|------|------|------|------|---------|----|
| chr10 | 102820488 | 102822874 | KAZALD1       | ENSG00000107821 | 682  | 0.3  | 0.3  | 0.81 | -0.0075 | NA |
| chr10 | 116852261 | 116854094 | ATRNL1        | ENSG00000107518 | 53   | 0.23 | 0.22 | 0.81 | 0.0093  | NA |
| chr10 | 50821487  | 50821688  | CHAT          | ENSG00000070748 | 422  | 0.52 | 0.57 | 0.82 | -0.056  | NA |
| chr10 | 62703307  | 62704290  | RHOBTB1       | ENSG00000072422 | 207  | 0.24 | 0.23 | 0.83 | 0.013   | NA |
| chr10 | 75385082  | 75385994  | USP54         | ENSG00000166348 | -130 | 0.27 | 0.29 | 0.83 | -0.019  | NA |
| chr10 | 121355813 | 121356958 | TIAL1         | ENSG00000151923 | -378 | 0.24 | 0.25 | 0.84 | -0.012  | NA |
| chr10 | 26727061  | 26727992  | APBB1IP       | ENSG00000077420 | 394  | 0.27 | 0.29 | 0.85 | -0.012  | NA |
| chr10 | 88853757  | 88855498  | GLUD1         | ENSG00000148672 | -800 | 0.21 | 0.2  | 0.85 | 0.0071  | NA |
| chr10 | 91294947  | 91295925  | SLC16A12      | ENSG00000152779 | -123 | 0.26 | 0.25 | 0.85 | 0.012   | NA |
| chr10 | 90639787  | 90640623  | STAMBPL1      | ENSG00000138134 | 224  | 0.23 | 0.21 | 0.86 | 0.016   | NA |
| chr10 | 112327072 | 112327870 | SMC3          | ENSG00000108055 | 22   | 0.2  | 0.22 | 0.86 | -0.021  | NA |
| chr10 | 135207467 | 135208073 | AL360181.1    | ENSG00000148824 | 172  | 0.24 | 0.22 | 0.87 | 0.012   | NA |
| chr10 | 29698362  | 29699044  | RP11-534G20.3 | ENSG00000224597 | 235  | 0.21 | 0.2  | 0.88 | 0.017   | NA |
| chr10 | 104178528 | 104179548 | PSD           | ENSG00000059915 | -137 | 0.16 | 0.2  | 0.88 | -0.04   | NA |
| chr10 | 14995680  | 14996431  | DCLRE1C       | ENSG00000152457 | -38  | 0.26 | 0.25 | 0.89 | 0.011   | NA |
| chr10 | 126490161 | 126490934 | FAM175B       | ENSG00000165660 | 193  | 0.2  | 0.18 | 0.89 | 0.014   | NA |
| chr10 | 5683648   | 5683878   | ASB13         | ENSG00000196372 | 12   | 0.97 | 0.96 | 0.9  | 0.011   | NA |
| chr10 | 33246271  | 33247707  | ITGB1         | ENSG00000150093 | -267 | 0.19 | 0.19 | 0.9  | 0.0061  | NA |
| chr10 | 77191061  | 77191571  | C10orf11      | ENSG00000148655 | 105  | 0.3  | 0.28 | 0.9  | 0.023   | NA |
| chr10 | 99496649  | 99497451  | ZFYVE27       | ENSG00000155256 | 172  | 0.22 | 0.21 | 0.9  | 0.013   | NA |
| chr10 | 93392667  | 93393147  | PPP1R3C       | ENSG00000119938 | -158 | 0.2  | 0.19 | 0.91 | 0.0093  | NA |
| chr10 | 131264948 | 131265710 | MGMT          | ENSG00000170430 | -119 | 0.29 | 0.29 | 0.91 | -0.0072 | NA |
| chr10 | 134729798 | 134730022 | C10orf93      | ENSG00000171811 | 276  | 0.94 | 0.97 | 0.91 | -0.029  | NA |
| chr10 | 3145919   | 3146206   | PFKP          | ENSG00000067057 | -854 | 0.93 | 0.95 | 0.92 | -0.028  | NA |
| chr10 | 70883663  | 70884353  | VPS26A        | ENSG00000122958 | 100  | 0.21 | 0.2  | 0.92 | 0.011   | NA |
| chr10 | 71168699  | 71168952  | TACR2         | ENSG00000075073 | 213  | 0.24 | 0.12 | 0.92 | 0.11    | NA |
| chr10 | 72647738  | 72648317  | PCBD1         | ENSG00000166228 | -16  | 0.23 | 0.21 | 0.92 | 0.019   | NA |
| chr10 | 95462160  | 95462500  | FRA10AC1      | ENSG00000148690 | -5   | 0.36 | 0.41 | 0.92 | -0.042  | NA |
| chr10 | 118608599 | 118609377 | ENO4          | ENSG00000188316 | -35  | 0.26 | 0.24 | 0.92 | 0.018   | NA |
| chr10 | 81107667  | 81107947  | PPIF          | ENSG00000108179 | 393  | 0.28 | 0.24 | 0.93 | 0.041   | NA |

|       |           |           |              |                 |       |      |      |      |          |    |
|-------|-----------|-----------|--------------|-----------------|-------|------|------|------|----------|----|
| chr10 | 103347679 | 103348215 | POLL         | ENSG00000166169 | -64   | 0.18 | 0.2  | 0.93 | -0.017   | NA |
| chr10 | 75531970  | 75532817  | FUT11        | ENSG00000196968 | 344   | 0.3  | 0.3  | 0.94 | 0.0059   | NA |
| chr10 | 99257940  | 99259520  | MMS19        | ENSG00000155229 | -589  | 0.24 | 0.25 | 0.94 | -0.0052  | NA |
| chr10 | 103542711 | 103543290 | NPM3         | ENSG00000107833 | 132   | 0.23 | 0.26 | 0.94 | -0.026   | NA |
| chr10 | 135083739 | 135083962 | ADAM8        | ENSG00000151651 | 1079  | 0.84 | 0.82 | 0.94 | 0.018    | NA |
| chr10 | 75006629  | 75007184  | C10orf103    | ENSG00000236756 | -40   | 0.24 | 0.25 | 0.95 | -0.01    | NA |
| chr10 | 127584249 | 127585538 | DHX32        | ENSG00000089876 | 112   | 0.56 | 0.56 | 0.96 | -0.0011  | NA |
| chr10 | 11865125  | 11865984  | C10orf47     | ENSG00000148426 | 216   | 0.23 | 0.24 | 0.97 | -0.0055  | NA |
| chr10 | 21783198  | 21786420  | MIR1915      | ENSG00000222071 | 761   | 0.21 | 0.2  | 0.97 | 0.0024   | NA |
| chr10 | 50817601  | 50820356  | SLC18A3      | ENSG00000187714 | 631   | 0.27 | 0.27 | 0.97 | -0.0039  | NA |
| chr10 | 124638743 | 124639793 | FAM24B       | ENSG00000213185 | -171  | 0.19 | 0.19 | 0.97 | -0.0056  | NA |
| chr10 | 33269511  | 33269870  | RP11-462L8.1 | ENSG00000229656 | -1779 | 0.4  | 0.25 | 0.98 | 0.15     | NA |
| chr10 | 61665656  | 61666794  | CCDC6        | ENSG00000108091 | 189   | 0.23 | 0.23 | 0.98 | 0.0048   | NA |
| chr10 | 98510218  | 98510427  | RPL13AP5     | ENSG00000236552 | 277   | 1    | 0.94 | 0.98 | 0.056    | NA |
| chr10 | 104210095 | 104210985 | C10orf95     | ENSG00000120055 | 662   | 0.2  | 0.21 | 0.98 | -0.015   | NA |
| chr10 | 391382    | 394008    | DIP2C        | ENSG00000151240 | 1190  | 0.99 | 0.99 | 0.99 | 0.0015   | NA |
| chr10 | 60144723  | 60145335  | TFAM         | ENSG00000108064 | 247   | 0.17 | 0.17 | 0.99 | 0.0042   | NA |
| chr10 | 72237661  | 72238821  | KIAA1274     | ENSG00000107719 | -323  | 0.23 | 0.23 | 0.99 | -0.0023  | NA |
| chr10 | 81966989  | 81967517  | RP11-40F6.2  | ENSG00000237523 | -213  | 0.95 | 0.97 | 0.99 | -0.022   | NA |
| chr10 | 1205562   | 1205859   | NCRNA00200   | ENSG00000229205 | 2     | 0.98 | 0.97 | 1    | 0.0041   | NA |
| chr10 | 1230813   | 1231214   | ADARB2       | ENSG00000185736 | 1493  | 0.87 | 0.87 | 1    | 1.00E-04 | NA |
| chr10 | 1778784   | 1780018   | ADARB2       | ENSG00000185736 | 269   | 0.24 | 0.24 | 1    | -0.0019  | NA |
| chr10 | 3180174   | 3180578   | PITRM1       | ENSG00000107959 | 406   | 0.95 | 0.96 | 1    | -0.0092  | NA |
| chr10 | 5567122   | 5567828   | RP11-116G8.5 | ENSG00000256462 | 230   | 0.93 | 0.93 | 1    | 0.0031   | NA |
| chr10 | 7618377   | 7618615   | ITIH5        | ENSG00000123243 | 64    | 0.98 | 0.98 | 1    | -0.0042  | NA |
| chr10 | 8555658   | 8556102   | KRT8P37      | ENSG00000213771 | 1189  | 0.92 | 0.93 | 1    | -0.0024  | NA |
| chr10 | 13141778  | 13142493  | OPTN         | ENSG00000123240 | -24   | 0.2  | 0.21 | 1    | -0.0085  | NA |
| chr10 | 16478803  | 16479303  | PTER         | ENSG00000165983 | 89    | 0.32 | 0.32 | 1    | 0.0014   | NA |
| chr10 | 17686097  | 17686335  | STAM         | ENSG00000136738 | 92    | 0.12 | 0.11 | 1    | 0.017    | NA |
| chr10 | 18429125  | 18430234  | CACNB2       | ENSG00000165995 | 73    | 0.24 | 0.24 | 1    | -0.002   | NA |

|       |          |          |               |                 |       |      |      |   |          |    |
|-------|----------|----------|---------------|-----------------|-------|------|------|---|----------|----|
| chr10 | 23384533 | 23385078 | MSRB2         | ENSG00000148450 | 370   | 0.29 | 0.3  | 1 | -0.014   | NA |
| chr10 | 28591622 | 28592117 | MPP7          | ENSG00000150054 | 126   | 0.24 | 0.23 | 1 | 0.0083   | NA |
| chr10 | 28965704 | 28967266 | BAMBI         | ENSG00000095739 | 214   | 0.19 | 0.18 | 1 | 0.0027   | NA |
| chr10 | 38645112 | 38645513 | HSD17B7P2     | ENSG00000099251 | 7     | 0.29 | 0.3  | 1 | -0.0082  | NA |
| chr10 | 43818074 | 43818604 | RP11-168L22.2 | ENSG00000224265 | -774  | 0.26 | 0.26 | 1 | -0.0057  | NA |
| chr10 | 45454795 | 45455044 | RASSF4        | ENSG00000107551 | 64    | 0.16 | 0.18 | 1 | -0.026   | NA |
| chr10 | 46089871 | 46090462 | RP11-358L16.2 | ENSG00000242639 | -120  | 0.25 | 0.25 | 1 | 0.00053  | NA |
| chr10 | 46992447 | 46993295 | GPRIN2        | ENSG00000204175 | -1216 | 0.19 | 0.18 | 1 | 0.0015   | NA |
| chr10 | 47151424 | 47151676 | AL391137.1    | ENSG00000179251 | 298   | 0.17 | 0.17 | 1 | 0.0082   | NA |
| chr10 | 47395840 | 47396088 | RP11-575L16.2 | ENSG00000226964 | -259  | 0.4  | 0.33 | 1 | 0.07     | NA |
| chr10 | 48389019 | 48389375 | RBP3          | ENSG00000107618 | 1794  | 1    | 0.99 | 1 | 0.012    | NA |
| chr10 | 49348137 | 49348676 | PTPN20C       | ENSG00000126542 | 63    | 0.99 | 0.99 | 1 | 0.0027   | NA |
| chr10 | 49687661 | 49687870 | ARHGAP22      | ENSG00000128805 | -516  | 1    | 0.86 | 1 | 0.14     | NA |
| chr10 | 51565071 | 51565648 | NCOA4         | ENSG00000138293 | 251   | 0.41 | 0.39 | 1 | 0.017    | NA |
| chr10 | 57388068 | 57388528 | PCDH15        | ENSG00000150275 | -596  | 0.25 | 0.22 | 1 | 0.028    | NA |
| chr10 | 59866382 | 59866798 | RP11-123G9.1  | ENSG00000232115 | 50    | 1    | 1    | 1 | 0        | NA |
| chr10 | 62537970 | 62538862 | CDK1          | ENSG00000170312 | 327   | 0.27 | 0.27 | 1 | -0.0005  | NA |
| chr10 | 65930617 | 65930890 | RP11-386C23.1 | ENSG00000235489 | -142  | 0.98 | 1    | 1 | -0.023   | NA |
| chr10 | 70320130 | 70320822 | TET1          | ENSG00000138336 | 63    | 0.21 | 0.21 | 1 | -0.0012  | NA |
| chr10 | 71008272 | 71008478 | HKDC1         | ENSG00000156510 | 1109  | 0.83 | 0.86 | 1 | -0.031   | NA |
| chr10 | 74927642 | 74928063 | ECD           | ENSG00000122882 | -153  | 0.33 | 0.28 | 1 | 0.052    | NA |
| chr10 | 75541557 | 75542206 | CHCHD1        | ENSG00000172586 | 76    | 0.24 | 0.24 | 1 | 8.60E-05 | NA |
| chr10 | 81107082 | 81107488 | PPIF          | ENSG00000108179 | 60    | 0.22 | 0.22 | 1 | -0.0087  | NA |
| chr10 | 81444163 | 81444474 | RP11-119F19.4 | ENSG00000224886 | 421   | 1    | 1    | 1 | 0        | NA |
| chr10 | 89577481 | 89578287 | CFL1P1        | ENSG00000223820 | 199   | 0.28 | 0.28 | 1 | 1.00E-04 | NA |
| chr10 | 93169487 | 93170573 | HECTD2        | ENSG00000165338 | -66   | 0.23 | 0.24 | 1 | -0.0071  | NA |
| chr10 | 93668002 | 93668771 | FGFBP3        | ENSG00000174721 | 854   | 0.21 | 0.21 | 1 | 0.0057   | NA |
| chr10 | 95256133 | 95256562 | CEP55         | ENSG00000138180 | -42   | 0.13 | 0.12 | 1 | 0.0095   | NA |
| chr10 | 96122540 | 96122904 | NOC3L         | ENSG00000173145 | -26   | 0.24 | 0.24 | 1 | 0.0048   | NA |
| chr10 | 99160814 | 99161116 | RP11-452K12.7 | ENSG00000231970 | 93    | 0.2  | 0.21 | 1 | -0.01    | NA |



|       |           |           |               |                 |       |      |      |    |          |    |
|-------|-----------|-----------|---------------|-----------------|-------|------|------|----|----------|----|
| chr10 | 100993820 | 100994188 | HPSE2         | ENSG00000172987 | 1555  | 0.2  | 0.2  | 1  | 0.0015   | NA |
| chr10 | 101292436 | 101292851 | NKX2-3        | ENSG00000119919 | -47   | 0.26 | 0.25 | 1  | 0.012    | NA |
| chr10 | 101293015 | 101293238 | NKX2-3        | ENSG00000119919 | 436   | 0.33 | 1    | 1  | -0.67    | NA |
| chr10 | 102289150 | 102289742 | NDUFB8        | ENSG00000166136 | 173   | 0.2  | 0.21 | 1  | -0.0096  | NA |
| chr10 | 103329326 | 103329535 | DPCD          | ENSG00000166171 | -887  | 0.19 | 0.2  | 1  | -0.0083  | NA |
| chr10 | 103577394 | 103578256 | MGEA5         | ENSG00000198408 | -202  | 0.34 | 0.33 | 1  | 0.0079   | NA |
| chr10 | 103815502 | 103816105 | C10orf76      | ENSG00000120029 | 147   | 0.3  | 0.3  | 1  | 0.0066   | NA |
| chr10 | 103824894 | 103825778 | HPS6          | ENSG00000166189 | 189   | 0.19 | 0.19 | 1  | 0.0011   | NA |
| chr10 | 104191984 | 104192527 | CUEDC2        | ENSG00000107874 | 70    | 0.15 | 0.12 | 1  | 0.035    | NA |
| chr10 | 104416555 | 104417165 | TRIM8         | ENSG00000171206 | 1822  | 0.89 | 0.89 | 1  | -0.0058  | NA |
| chr10 | 105253191 | 105254428 | NEURL         | ENSG00000107954 | 73    | 0.25 | 0.25 | 1  | 0.0017   | NA |
| chr10 | 119000435 | 119001530 | SLC18A2       | ENSG00000165646 | 378   | 0.2  | 0.2  | 1  | 4.00E-04 | NA |
| chr10 | 123734027 | 123734865 | NSMCE4A       | ENSG00000107672 | -192  | 0.25 | 0.25 | 1  | 0.0023   | NA |
| chr10 | 123872119 | 123873462 | TACC2         | ENSG00000138162 | 245   | 0.19 | 0.19 | 1  | 0.00051  | NA |
| chr10 | 124767758 | 124768897 | IKZF5         | ENSG00000095574 | -38   | 0.22 | 0.23 | 1  | -0.0047  | NA |
| chr10 | 128193311 | 128193531 | C10orf90      | ENSG00000154493 | -734  | 0.95 | 1    | 1  | -0.046   | NA |
| chr10 | 128973590 | 128974064 | FAM196A       | ENSG00000188916 | 1446  | 0.99 | 0.98 | 1  | 0.0077   | NA |
| chr10 | 134672369 | 134672604 | C10orf93      | ENSG00000171811 | -1250 | 0.95 | 0.94 | 1  | 0.0081   | NA |
| chr10 | 134884426 | 134884646 | GPR123        | ENSG00000197177 | 103   | 1    | 0.95 | 1  | 0.048    | NA |
| chr10 | 134980302 | 134981059 | KNDC1         | ENSG00000171798 | -8    | 0.63 | 0.64 | 1  | -0.011   | NA |
| chr10 | 135103295 | 135103554 | TUBGCP2       | ENSG00000130640 | 1114  | 0.98 | 0.98 | 1  | 0.0083   | NA |
| chr10 | 669070    | 669336    | AL358216.1    | ENSG00000236454 | 1826  | 1    | NA   | NA | NA       | NA |
| chr10 | 1284151   | 1284422   | ADARB2        | ENSG00000185736 | -1693 | 0.83 | NA   | NA | NA       | NA |
| chr10 | 2357248   | 2357471   | RP11-311B18.1 | ENSG00000234556 | -90   | NA   | 1    | NA | NA       | NA |
| chr10 | 5488484   | 5488686   | NET1          | ENSG00000173848 | 13    | 0.89 | NA   | NA | NA       | NA |
| chr10 | 17243304  | 17243787  | TRDMT1        | ENSG00000107614 | -118  | 0.15 | NA   | NA | NA       | NA |
| chr10 | 20106643  | 20106946  | PLXDC2        | ENSG00000120594 | 1428  | 0.29 | NA   | NA | NA       | NA |
| chr10 | 21816296  | 21816528  | C10orf140     | ENSG00000180592 | -1801 | 0.19 | NA   | NA | NA       | NA |
| chr10 | 27444133  | 27444494  | YME1L1        | ENSG00000136758 | -118  | NA   | 0.11 | NA | NA       | NA |
| chr10 | 32398836  | 32399096  | RP11-241I20.4 | ENSG00000235113 | 177   | 0.87 | NA   | NA | NA       | NA |

|       |           |           |                |                 |       |      |      |          |       |    |
|-------|-----------|-----------|----------------|-----------------|-------|------|------|----------|-------|----|
| chr10 | 47967314  | 47967636  | SLC9A3P4       | ENSG00000237393 | 1715  | 0.14 | NA   | NA       | NA    | NA |
| chr10 | 51623044  | 51623943  | TIMM23         | ENSG00000138297 | -290  | NA   | 0.23 | NA       | NA    | NA |
| chr10 | 92913390  | 92913694  | RP11-56M3.1    | ENSG00000234043 | -436  | 0.88 | NA   | NA       | NA    | NA |
| chr10 | 99051934  | 99052490  | ARHGAP19       | ENSG00000213390 | 168   | 0.5  | NA   | NA       | NA    | NA |
| chr10 | 99473084  | 99473291  | MARVELD1       | ENSG00000155254 | -87   | 0.4  | NA   | NA       | NA    | NA |
| chr10 | 102027099 | 102027490 | CWF19L1        | ENSG00000095485 | 61    | 0.23 | NA   | NA       | NA    | NA |
| chr10 | 103590286 | 103590609 | KCNIP2         | ENSG00000120049 | -252  | NA   | 1    | NA       | NA    | NA |
| chr10 | 104629038 | 104629479 | AS3MT          | ENSG00000214435 | -15   | 0.2  | NA   | NA       | NA    | NA |
| chr10 | 105881449 | 105881947 | MEIR5          | ENSG00000156384 | -118  | 0.13 | NA   | NA       | NA    | NA |
| chr10 | 115938962 | 115939292 | TDRD1          | ENSG00000095627 | 98    | 1    | NA   | NA       | NA    | NA |
| chr10 | 134165143 | 134166313 | LRRC27         | ENSG00000148814 | 617   | 1    | NA   | NA       | NA    | NA |
| chr10 | 135122851 | 135123109 | ZNF511         | ENSG00000198546 | 66    | 1    | NA   | NA       | NA    | NA |
| chr10 | 135203101 | 135203316 | MTG1           | ENSG00000254536 | -1130 | 1    | NA   | NA       | NA    | NA |
| chr10 | 135238430 | 135238747 | SPRN           | ENSG00000203772 | -512  | 1    | NA   | NA       | NA    | NA |
| chr10 | 135390624 | 135390978 | RP11-108K14.7  | ENSG00000233685 | -1266 | 1    | NA   | NA       | NA    | NA |
| chr11 | 64509433  | 64513826  | RASGRP2        | ENSG00000068831 | -1220 | 0.49 | 0.32 | 3.80E-09 | 0.17  | NA |
| chr11 | 64335489  | 64335965  | SLC22A11       | ENSG00000168065 | 655   | 0.74 | 0.3  | 4.80E-09 | 0.44  | NA |
| chr11 | 65374699  | 65375308  | MAP3K11        | ENSG00000173327 | 338   | 0.43 | 0.12 | 6.10E-09 | 0.3   | NA |
| chr11 | 68205925  | 68206126  | LRP5           | ENSG00000162337 | -36   | 0.96 | 0.49 | 6.30E-09 | 0.47  | NA |
| chr11 | 66102024  | 66102279  | RP11-867G23.12 | ENSG00000254756 | 186   | 0.74 | 0.26 | 9.20E-09 | 0.48  | NA |
| chr11 | 16759945  | 16760386  | C11orf58       | ENSG00000110696 | 217   | 0.77 | 0.09 | 1.50E-08 | 0.68  | NA |
| chr11 | 94770606  | 94771404  | RP11-60C6.5    | ENSG00000256779 | 359   | 0.61 | 0.39 | 3.00E-08 | 0.22  | NA |
| chr11 | 32913989  | 32915514  | QSER1          | ENSG00000060749 | 27    | 0.3  | 0.14 | 3.80E-08 | 0.16  | NA |
| chr11 | 116371182 | 116371606 | AP001891.1     | ENSG00000236437 | -47   | 0.36 | 0.97 | 4.90E-08 | -0.61 | NA |
| chr11 | 119191535 | 119192182 | MCAM           | ENSG00000076706 | -59   | 0.74 | 0.37 | 8.80E-08 | 0.37  | NA |
| chr11 | 121233742 | 121233995 | BMPR1APS2      | ENSG00000232460 | -294  | 0.76 | 1    | 2.20E-07 | -0.24 | NA |
| chr11 | 45907006  | 45907809  | MAPK8IP1       | ENSG00000121653 | 205   | 0.35 | 0.14 | 2.30E-07 | 0.21  | NA |
| chr11 | 72295167  | 72295875  | PDE2A          | ENSG00000186642 | -4    | 0.52 | 0.3  | 2.60E-07 | 0.21  | NA |
| chr11 | 420265    | 420975    | ANO9           | ENSG00000185101 | 666   | 0.8  | 0.58 | 3.60E-07 | 0.22  | NA |
| chr11 | 35965642  | 35966454  | LDLRAD3        | ENSG00000179241 | 399   | 0.39 | 0.13 | 4.00E-07 | 0.25  | NA |

|       |           |           |               |                 |       |      |      |          |       |    |
|-------|-----------|-----------|---------------|-----------------|-------|------|------|----------|-------|----|
| chr11 | 134123209 | 134123996 | THYN1         | ENSG00000151500 | -364  | 0.45 | 0.17 | 5.10E-07 | 0.28  | NA |
| chr11 | 72145155  | 72145636  | CLPB          | ENSG00000162129 | -210  | 0.22 | 0.59 | 6.40E-07 | -0.37 | NA |
| chr11 | 624780    | 625053    | CDHR5         | ENSG00000099834 | 16    | 0.18 | 0.73 | 8.30E-07 | -0.55 | NA |
| chr11 | 78673007  | 78673213  | ODZ4          | ENSG00000149256 | 154   | 0.76 | 0.2  | 1.10E-06 | 0.56  | NA |
| chr11 | 6676496   | 6677096   | DCHS1         | ENSG00000166341 | 289   | 0.38 | 0.19 | 1.40E-06 | 0.19  | NA |
| chr11 | 48921725  | 48922742  | RP11-56P9.10  | ENSG00000254728 | 1500  | 0.93 | 0.77 | 1.60E-06 | 0.16  | NA |
| chr11 | 64428238  | 64428459  | NRXN2         | ENSG00000110076 | 502   | 0.94 | 0.7  | 2.30E-06 | 0.24  | NA |
| chr11 | 110581839 | 110583883 | ARHGAP20      | ENSG00000137727 | -88   | 0.31 | 0.17 | 2.30E-06 | 0.14  | NA |
| chr11 | 57334971  | 57335486  | UBE2L6        | ENSG00000156587 | 52    | 0.31 | 0.09 | 2.40E-06 | 0.22  | NA |
| chr11 | 120039601 | 120040210 | AP000679.2    | ENSG00000176984 | 220   | 0.36 | 0.14 | 3.00E-06 | 0.22  | NA |
| chr11 | 61544727  | 61545563  | C11orf9       | ENSG00000124920 | 67    | 0.52 | 0.33 | 3.60E-06 | 0.19  | NA |
| chr11 | 62446038  | 62446613  | UBXN1         | ENSG00000162191 | 157   | 0.39 | 0.16 | 4.10E-06 | 0.23  | NA |
| chr11 | 74659931  | 74660373  | XRRA1         | ENSG00000166435 | -87   | 0.4  | 0.15 | 5.70E-06 | 0.26  | NA |
| chr11 | 32851160  | 32851951  | PRRG4         | ENSG00000135378 | 66    | 0.33 | 0.18 | 5.90E-06 | 0.15  | NA |
| chr11 | 64066757  | 64068741  | C11orf20      | ENSG00000219435 | -114  | 0.34 | 0.22 | 6.30E-06 | 0.12  | NA |
| chr11 | 111749570 | 111750078 | C11orf1       | ENSG00000137720 | 165   | 0.42 | 0.1  | 6.30E-06 | 0.33  | NA |
| chr11 | 62648237  | 62649161  | SLC3A2        | ENSG00000168003 | 355   | 0.27 | 0.12 | 6.40E-06 | 0.16  | NA |
| chr11 | 60619924  | 60621111  | RP11-804A23.4 | ENSG00000256813 | -1963 | 0.85 | 0.74 | 7.50E-06 | 0.11  | NA |
| chr11 | 554713    | 556560    | C11orf35      | ENSG00000185522 | 784   | 0.35 | 0.22 | 8.30E-06 | 0.14  | NA |
| chr11 | 64135815  | 64136381  | MIR1237       | ENSG00000221273 | 24    | 0.93 | 0.64 | 8.80E-06 | 0.29  | NA |
| chr11 | 9779592   | 9780470   | RP11-540A21.2 | ENSG00000245522 | -320  | 0.32 | 0.09 | 1.20E-05 | 0.22  | NA |
| chr11 | 65314912  | 65315476  | LTBP3         | ENSG00000168056 | -158  | 0.92 | 0.7  | 1.20E-05 | 0.22  | NA |
| chr11 | 76750692  | 76751778  | B3GNT6        | ENSG00000198488 | 639   | 0.38 | 0.26 | 1.30E-05 | 0.12  | NA |
| chr11 | 30038934  | 30039148  | KCNA4         | ENSG00000182255 | -471  | 0.59 | 0.25 | 1.40E-05 | 0.34  | NA |
| chr11 | 64532936  | 64533763  | SF1           | ENSG00000168066 | 1740  | 0.85 | 0.5  | 1.50E-05 | 0.35  | NA |
| chr11 | 6502423   | 6502927   | ARFIP2        | ENSG00000132254 | -148  | 0.32 | 0.15 | 1.90E-05 | 0.17  | NA |
| chr11 | 119252130 | 119252564 | USP2          | ENSG00000036672 | -26   | 0.44 | 0.16 | 1.90E-05 | 0.28  | NA |
| chr11 | 31827696  | 31827921  | PAX6          | ENSG00000007372 | -247  | 0.61 | 0.32 | 2.20E-05 | 0.29  | NA |
| chr11 | 79148358  | 79152200  | ODZ4          | ENSG00000149256 | -35   | 0.3  | 0.19 | 2.40E-05 | 0.11  | NA |
| chr11 | 66056209  | 66057324  | YIF1A         | ENSG00000174851 | -288  | 0.3  | 0.16 | 2.70E-05 | 0.14  | NA |

|       |           |           |                |                 |       |      |      |          |       |    |
|-------|-----------|-----------|----------------|-----------------|-------|------|------|----------|-------|----|
| chr11 | 13030330  | 13032584  | RASSF10        | ENSG00000189431 | 761   | 0.28 | 0.15 | 2.90E-05 | 0.13  | NA |
| chr11 | 6591960   | 6592795   | DNHD1          | ENSG00000179532 | 81    | 0.99 | 0.86 | 3.30E-05 | 0.13  | NA |
| chr11 | 124629723 | 124629926 | RP11-677M14.3  | ENSG00000250073 | 799   | 0.93 | 0.55 | 3.30E-05 | 0.37  | NA |
| chr11 | 65029040  | 65029926  | POLA2          | ENSG00000014138 | 250   | 0.35 | 0.17 | 3.80E-05 | 0.18  | NA |
| chr11 | 96122536  | 96123587  | CCDC82         | ENSG00000149231 | -485  | 0.32 | 0.16 | 3.90E-05 | 0.16  | NA |
| chr11 | 7534554   | 7535727   | PPFIBP2        | ENSG00000166387 | 141   | 0.3  | 0.15 | 4.10E-05 | 0.16  | NA |
| chr11 | 12131813  | 12133016  | MICAL2         | ENSG00000133816 | 276   | 0.31 | 0.17 | 4.20E-05 | 0.15  | NA |
| chr11 | 65340117  | 65340483  | FAM89B         | ENSG00000176973 | 159   | 0.49 | 0.23 | 4.20E-05 | 0.25  | NA |
| chr11 | 849087    | 850982    | TSPAN4         | ENSG00000214063 | 218   | 0.27 | 0.17 | 4.80E-05 | 0.099 | NA |
| chr11 | 72437676  | 72438005  | ARAP1          | ENSG00000186635 | 333   | 0.74 | 0.95 | 4.90E-05 | -0.22 | NA |
| chr11 | 46402624  | 46404139  | MDK            | ENSG00000110492 | 624   | 0.3  | 0.18 | 5.30E-05 | 0.11  | NA |
| chr11 | 534691    | 537718    | HRAS           | ENSG00000174775 | -865  | 0.28 | 0.19 | 5.60E-05 | 0.092 | NA |
| chr11 | 2158951   | 2162484   | IGF2           | ENSG00000167244 | -513  | 0.28 | 0.18 | 5.70E-05 | 0.093 | NA |
| chr11 | 73371800  | 73372632  | PLEKHB1        | ENSG00000021300 | 862   | 0.39 | 0.19 | 5.80E-05 | 0.2   | NA |
| chr11 | 63766058  | 63768666  | MACROD1        | ENSG00000133315 | -668  | 0.3  | 0.41 | 5.90E-05 | -0.11 | NA |
| chr11 | 2017459   | 2018253   | H19            | ENSG00000130600 | -159  | 0.69 | 0.85 | 6.30E-05 | -0.16 | NA |
| chr11 | 65657874  | 65658970  | CCDC85B        | ENSG00000175602 | 547   | 0.27 | 0.15 | 6.50E-05 | 0.12  | NA |
| chr11 | 120206460 | 120207649 | ARHGEF12       | ENSG00000196914 | -733  | 0.3  | 0.18 | 6.70E-05 | 0.12  | NA |
| chr11 | 12695414  | 12696981  | TEAD1          | ENSG00000187079 | 228   | 0.33 | 0.16 | 7.10E-05 | 0.16  | NA |
| chr11 | 65413778  | 65415203  | SIPA1          | ENSG00000213445 | -347  | 0.53 | 0.41 | 7.10E-05 | 0.12  | NA |
| chr11 | 65341620  | 65342501  | EHBP1L1        | ENSG00000173442 | -1449 | 0.34 | 0.16 | 7.50E-05 | 0.19  | NA |
| chr11 | 65121938  | 65122712  | TIGD3          | ENSG00000173825 | 87    | 0.26 | 0.11 | 8.40E-05 | 0.14  | NA |
| chr11 | 9025095   | 9026315   | NRIP3          | ENSG00000175352 | -157  | 0.37 | 0.2  | 8.60E-05 | 0.16  | NA |
| chr11 | 57226766  | 57228707  | RTN4RL2        | ENSG00000186907 | -286  | 0.27 | 0.42 | 8.60E-05 | -0.15 | NA |
| chr11 | 55641710  | 55642120  | RP11-738O11.13 | ENSG00000254547 | 98    | 0.73 | 0.93 | 9.50E-05 | -0.2  | NA |
| chr11 | 66824118  | 66824621  | RHOD           | ENSG00000173156 | 80    | 0.57 | 0.27 | 9.50E-05 | 0.3   | NA |
| chr11 | 76571963  | 76572291  | ACER3          | ENSG00000078124 | 162   | 0.33 | 0.14 | 9.50E-05 | 0.19  | NA |
| chr11 | 66627530  | 66627732  | PC             | ENSG00000173599 | 315   | 0.9  | 0.62 | 9.60E-05 | 0.28  | NA |
| chr11 | 2949788   | 2951756   | PHLDA2         | ENSG00000181649 | -87   | 0.38 | 0.2  | 1.00E-04 | 0.18  | NA |
| chr11 | 1410119   | 1412346   | BRSK2          | ENSG00000174672 | 103   | 0.35 | 0.2  | 0.00011  | 0.15  | NA |

|       |           |           |          |                 |      |      |      |          |        |    |
|-------|-----------|-----------|----------|-----------------|------|------|------|----------|--------|----|
| chr11 | 1947531   | 1947958   | TNNT3    | ENSG00000130595 | 1596 | 0.77 | 0.97 | 0.00011  | -0.21  | NA |
| chr11 | 63741900  | 63742614  | COX8A    | ENSG00000176340 | 178  | 0.35 | 0.14 | 0.00011  | 0.21   | NA |
| chr11 | 2923301   | 2923817   | SLC22A18 | ENSG00000110628 | 136  | 0.3  | 0.14 | 0.00012  | 0.16   | NA |
| chr11 | 30606004  | 30608128  | MPPED2   | ENSG00000066382 | 762  | 0.26 | 0.17 | 0.00012  | 0.093  | NA |
| chr11 | 45868742  | 45869413  | CRY2     | ENSG00000121671 | 120  | 0.25 | 0.14 | 0.00012  | 0.11   | NA |
| chr11 | 61447599  | 61448273  | DAGLA    | ENSG00000134780 | 31   | 0.31 | 0.16 | 0.00012  | 0.15   | NA |
| chr11 | 8289532   | 8290322   | LMO1     | ENSG00000166407 | 336  | 0.35 | 0.16 | 0.00013  | 0.19   | NA |
| chr11 | 13689588  | 13690724  | FAR1     | ENSG00000197601 | -61  | 0.26 | 0.15 | 0.00014  | 0.11   | NA |
| chr11 | 64875134  | 64876243  | C11orf2  | ENSG00000149823 | -839 | 0.82 | 0.7  | 0.00014  | 0.12   | NA |
| chr11 | 92702789  | 92703434  | MTNR1B   | ENSG00000134640 | 225  | 0.37 | 0.18 | 0.00014  | 0.19   | NA |
| chr11 | 111636594 | 111637214 | PPP2R1B  | ENSG00000137713 | -118 | 0.35 | 0.16 | 0.00014  | 0.19   | NA |
| chr11 | 57424937  | 57425262  | CLP1     | ENSG00000172409 | -125 | 0.33 | 0.18 | 0.00015  | 0.16   | NA |
| chr11 | 406491    | 407871    | SIGIRR   | ENSG00000185187 | -46  | 0.45 | 0.31 | 0.00018  | 0.15   | NA |
| chr11 | 31839363  | 31839813  | PAX6     | ENSG00000007372 | -103 | 0.38 | 0.17 | 0.00018  | 0.2    | NA |
| chr11 | 63997662  | 63998412  | DNAJC4   | ENSG00000110011 | 287  | 0.3  | 0.16 | 0.00018  | 0.14   | NA |
| chr11 | 118781060 | 118781732 | BCL9L    | ENSG00000186174 | 217  | 0.4  | 0.21 | 0.00018  | 0.19   | NA |
| chr11 | 61275825  | 61277329  | LRRC10B  | ENSG00000204950 | 305  | 0.22 | 0.3  | 0.00019  | -0.084 | NA |
| chr11 | 64611714  | 64612634  | CDC42BPG | ENSG00000171219 | -133 | 0.3  | 0.12 | 0.00019  | 0.18   | NA |
| chr11 | 44330542  | 44331761  | ALX4     | ENSG00000052850 | 565  | 0.41 | 0.28 | 0.00025  | 0.13   | NA |
| chr11 | 69588826  | 69590546  | FGF4     | ENSG00000075388 | 246  | 0.28 | 0.18 | 0.00025  | 0.098  | NA |
| chr11 | 73087229  | 73088294  | RELT     | ENSG00000054967 | 452  | 0.33 | 0.17 | 0.00025  | 0.16   | NA |
| chr11 | 1330390   | 1331498   | TOLLIP   | ENSG00000078902 | -131 | 0.27 | 0.17 | 0.00027  | 0.1    | NA |
| chr11 | 74442260  | 74442874  | CHRDL2   | ENSG00000054938 | -137 | 0.32 | 0.17 | 0.00028  | 0.15   | NA |
| chr11 | 32448261  | 32449744  | WT1      | ENSG00000184937 | 1573 | 0.32 | 0.19 | 3.00E-04 | 0.12   | NA |
| chr11 | 102322529 | 102323762 | TMEM123  | ENSG00000152558 | -59  | 0.37 | 0.15 | 0.00032  | 0.23   | NA |
| chr11 | 66083955  | 66084535  | CD248    | ENSG00000174807 | 270  | 0.41 | 0.62 | 0.00033  | -0.21  | NA |
| chr11 | 118661305 | 118663026 | DDX6     | ENSG00000110367 | -577 | 0.27 | 0.17 | 0.00034  | 0.095  | NA |
| chr11 | 14541600  | 14542225  | PSMA1    | ENSG00000129084 | -294 | 0.42 | 0.2  | 0.00036  | 0.22   | NA |
| chr11 | 117666634 | 117668141 | DSCAML1  | ENSG00000177103 | 419  | 0.28 | 0.16 | 0.00036  | 0.12   | NA |
| chr11 | 67980011  | 67982068  | SUV420H1 | ENSG00000110066 | -818 | 0.29 | 0.19 | 0.00037  | 0.099  | NA |

|       |           |           |               |                 |       |      |      |         |       |    |
|-------|-----------|-----------|---------------|-----------------|-------|------|------|---------|-------|----|
| chr11 | 92930760  | 92931391  | SLC36A4       | ENSG00000180773 | 20    | 0.32 | 0.18 | 0.00039 | 0.14  | NA |
| chr11 | 64112327  | 64112607  | CCDC88B       | ENSG00000168071 | 821   | 0.99 | 0.78 | 0.00043 | 0.2   | NA |
| chr11 | 67275067  | 67276431  | CDK2AP2       | ENSG00000167797 | -202  | 0.28 | 0.18 | 0.00047 | 0.098 | NA |
| chr11 | 1007921   | 1008343   | AP2A2         | ENSG00000183020 | -1223 | 0.79 | 0.6  | 0.00049 | 0.19  | NA |
| chr11 | 10829361  | 10831121  | EIF4G2        | ENSG00000110321 | -818  | 0.22 | 0.13 | 0.00056 | 0.098 | NA |
| chr11 | 66511803  | 66512719  | C11orf80      | ENSG00000173715 | 339   | 0.24 | 0.13 | 0.00057 | 0.11  | NA |
| chr11 | 89519060  | 89519482  | RP11-358N4.3  | ENSG00000255162 | 158   | 0.92 | 0.53 | 0.00058 | 0.39  | NA |
| chr11 | 72928982  | 72929885  | P2RY2         | ENSG00000175591 | 90    | 0.37 | 0.24 | 0.00059 | 0.13  | NA |
| chr11 | 27721661  | 27722639  | BDNF          | ENSG00000176697 | -115  | 0.31 | 0.17 | 0.00061 | 0.14  | NA |
| chr11 | 47600129  | 47600927  | KBTBD4        | ENSG00000123444 | -208  | 0.12 | 0.31 | 0.00061 | -0.19 | NA |
| chr11 | 1593550   | 1594378   | RP13-25N22.1  | ENSG00000233930 | -7    | 0.52 | 0.28 | 0.00067 | 0.25  | NA |
| chr11 | 30605558  | 30605800  | RP5-1024C24.1 | ENSG00000254489 | 2     | 0.63 | 0.2  | 0.00071 | 0.42  | NA |
| chr11 | 69924338  | 69925197  | ANO1          | ENSG00000131620 | 359   | 0.27 | 0.17 | 0.00077 | 0.1   | NA |
| chr11 | 72975469  | 72975797  | P2RY6         | ENSG00000171631 | 83    | 0.37 | 0.23 | 0.00092 | 0.14  | NA |
| chr11 | 117198423 | 117198950 | CEP164        | ENSG00000110274 | 120   | 0.22 | 0.43 | 0.00092 | -0.2  | NA |
| chr11 | 134211759 | 134212611 | GLB1L2        | ENSG00000149328 | -562  | 0.97 | 0.91 | 0.00097 | 0.067 | NA |
| chr11 | 27743472  | 27744564  | BDNF          | ENSG00000176697 | -413  | 0.4  | 0.2  | 0.001   | 0.2   | NA |
| chr11 | 66335575  | 66336151  | CTSF          | ENSG00000174080 | 204   | 0.32 | 0.15 | 0.001   | 0.17  | NA |
| chr11 | 67271659  | 67272942  | PITPNM1       | ENSG00000110697 | -577  | 0.4  | 0.26 | 0.001   | 0.14  | NA |
| chr11 | 118305422 | 118307705 | RP11-770J1.4  | ENSG00000255384 | -642  | 0.33 | 0.22 | 0.001   | 0.1   | NA |
| chr11 | 206975    | 209225    | BET1L         | ENSG00000177951 | -879  | 0.34 | 0.23 | 0.0011  | 0.12  | NA |
| chr11 | 66233899  | 66234964  | MRPL11        | ENSG00000174547 | -222  | 0.26 | 0.17 | 0.0011  | 0.09  | NA |
| chr11 | 66113970  | 66114258  | B3GNT1        | ENSG00000174684 | 950   | 0.62 | 0.27 | 0.0013  | 0.35  | NA |
| chr11 | 72852176  | 72854160  | FCHSD2        | ENSG00000137478 | -779  | 0.23 | 0.15 | 0.0014  | 0.081 | NA |
| chr11 | 746877    | 748032    | TALDO1        | ENSG00000177156 | 125   | 0.23 | 0.14 | 0.0015  | 0.082 | NA |
| chr11 | 67396844  | 67398294  | NUDT8         | ENSG00000167799 | -177  | 0.26 | 0.18 | 0.0016  | 0.078 | NA |
| chr11 | 9406108   | 9406702   | IPO7          | ENSG00000205339 | 236   | 0.23 | 0.15 | 0.0017  | 0.088 | NA |
| chr11 | 107798958 | 107799980 | SLC35F2       | ENSG00000110660 | -450  | 0.32 | 0.19 | 0.0017  | 0.13  | NA |
| chr11 | 128391712 | 128392611 | ETS1          | ENSG00000134954 | -65   | 0.31 | 0.18 | 0.0017  | 0.13  | NA |
| chr11 | 394257    | 394619    | PKP3          | ENSG00000184363 | 195   | 0.97 | 0.82 | 0.0018  | 0.15  | NA |

|       |           |           |               |                 |      |      |      |        |       |    |
|-------|-----------|-----------|---------------|-----------------|------|------|------|--------|-------|----|
| chr11 | 33721713  | 33721978  | C11orf91      | ENSG00000205177 | 98   | 0.58 | 0.29 | 0.0018 | 0.28  | NA |
| chr11 | 124735069 | 124736465 | ROBO3         | ENSG00000154134 | 485  | 0.3  | 0.2  | 0.0018 | 0.1   | NA |
| chr11 | 125757055 | 125758107 | HYLS1         | ENSG00000198331 | -96  | 0.39 | 0.25 | 0.0018 | 0.13  | NA |
| chr11 | 6439863   | 6440732   | APBB1         | ENSG00000166313 | 3    | 0.44 | 0.21 | 0.0019 | 0.23  | NA |
| chr11 | 3876287   | 3877431   | AC090587.5    | ENSG00000228661 | -120 | 0.17 | 0.31 | 0.002  | -0.14 | NA |
| chr11 | 7272757   | 7274235   | SYT9          | ENSG00000170743 | 315  | 0.34 | 0.24 | 0.002  | 0.11  | NA |
| chr11 | 76155407  | 76156827  | RP11-111M22.3 | ENSG00000255135 | -499 | 0.34 | 0.19 | 0.002  | 0.15  | NA |
| chr11 | 3012799   | 3014181   | NAP1L4        | ENSG00000205531 | -158 | 0.25 | 0.12 | 0.0021 | 0.13  | NA |
| chr11 | 63706029  | 63706868  | NAA40         | ENSG00000110583 | 17   | 0.3  | 0.16 | 0.0022 | 0.14  | NA |
| chr11 | 124823793 | 124824329 | CCDC15        | ENSG00000149548 | 44   | 0.4  | 0.2  | 0.0022 | 0.2   | NA |
| chr11 | 71318220  | 71319488  | AP000867.1    | ENSG00000187811 | -367 | 0.16 | 0.26 | 0.0023 | -0.1  | NA |
| chr11 | 89784903  | 89785927  | RP11-529A4.12 | ENSG00000254916 | 1489 | 1    | 0.43 | 0.0023 | 0.57  | NA |
| chr11 | 8040409   | 8041558   | TUB           | ENSG00000166402 | 192  | 0.34 | 0.22 | 0.0024 | 0.12  | NA |
| chr11 | 77531186  | 77532262  | RSF1          | ENSG00000048649 | 21   | 0.26 | 0.16 | 0.0024 | 0.097 | NA |
| chr11 | 76494416  | 76495672  | TSKU          | ENSG00000182704 | -148 | 0.25 | 0.42 | 0.0025 | -0.17 | NA |
| chr11 | 102217574 | 102218247 | BIRC2         | ENSG00000110330 | -32  | 0.32 | 0.17 | 0.0025 | 0.16  | NA |
| chr11 | 94226672  | 94227412  | ANKRD49       | ENSG00000168876 | 247  | 0.11 | 0.33 | 0.0027 | -0.22 | NA |
| chr11 | 64109822  | 64110228  | CCDC88B       | ENSG00000168071 | -178 | 0.32 | 1    | 0.0029 | -0.68 | NA |
| chr11 | 45234222  | 45234428  | AC103681.1    | ENSG00000246343 | 1964 | 0.94 | 0.74 | 0.0031 | 0.2   | NA |
| chr11 | 20408755  | 20409781  | PRMT3         | ENSG00000185238 | 192  | 0.18 | 0.28 | 0.0032 | -0.11 | NA |
| chr11 | 64815040  | 64815722  | NAALADL1      | ENSG00000168060 | -177 | 0.84 | 0.69 | 0.0032 | 0.15  | NA |
| chr11 | 6704296   | 6704943   | MRPL17        | ENSG00000158042 | -92  | 0.3  | 0.09 | 0.0033 | 0.22  | NA |
| chr11 | 66790543  | 66791440  | SYT12         | ENSG00000173227 | 175  | 0.25 | 0.17 | 0.0033 | 0.086 | NA |
| chr11 | 118023352 | 118024194 | SCN4B         | ENSG00000177098 | -238 | 0.29 | 0.17 | 0.0036 | 0.13  | NA |
| chr11 | 43963626  | 43966048  | C11orf96      | ENSG00000187479 | 782  | 0.29 | 0.2  | 0.0037 | 0.091 | NA |
| chr11 | 77348423  | 77348959  | CLNS1A        | ENSG00000074201 | 105  | 0.42 | 0.15 | 0.0037 | 0.27  | NA |
| chr11 | 2290104   | 2292932   | ASCL2         | ENSG00000183734 | 664  | 0.35 | 0.27 | 0.0039 | 0.077 | NA |
| chr11 | 65547499  | 65549261  | RP11-770G2.3  | ENSG00000254470 | -884 | 0.27 | 0.17 | 0.0044 | 0.11  | NA |
| chr11 | 47198027  | 47198885  | ARFGAP2       | ENSG00000149182 | -121 | 0.22 | 0.36 | 0.0045 | -0.13 | NA |
| chr11 | 115373574 | 115375881 | CADM1         | ENSG00000182985 | 380  | 0.26 | 0.2  | 0.0045 | 0.065 | NA |

|       |           |           |               |                 |      |      |      |        |       |    |
|-------|-----------|-----------|---------------|-----------------|------|------|------|--------|-------|----|
| chr11 | 1768979   | 1770712   | IFITM10       | ENSG00000244242 | 487  | 0.29 | 0.21 | 0.0047 | 0.077 | NA |
| chr11 | 47207188  | 47209176  | PACSIN3       | ENSG00000165912 | -750 | 0.28 | 0.18 | 0.0047 | 0.11  | NA |
| chr11 | 4115689   | 4116489   | RRM1          | ENSG00000167325 | 152  | 0.4  | 0.21 | 0.0048 | 0.19  | NA |
| chr11 | 59383165  | 59383410  | OSBP          | ENSG00000110048 | -150 | 0.31 | 0.16 | 0.0048 | 0.15  | NA |
| chr11 | 94800243  | 94801117  | SRSF8         | ENSG00000180771 | 319  | 0.32 | 0.2  | 0.0048 | 0.12  | NA |
| chr11 | 46958170  | 46958529  | C11orf49      | ENSG00000149179 | 109  | 0.24 | 0.73 | 0.005  | -0.49 | NA |
| chr11 | 76091524  | 76092638  | PRKRIR        | ENSG00000137492 | -95  | 0.28 | 0.17 | 0.005  | 0.11  | NA |
| chr11 | 65655469  | 65656206  | FIBP          | ENSG00000172500 | 70   | 0.31 | 0.17 | 0.0055 | 0.14  | NA |
| chr11 | 299389    | 299635    | IFITM5        | ENSG00000206013 | 14   | 0.81 | 0.95 | 0.0056 | -0.13 | NA |
| chr11 | 64072064  | 64073914  | ESRRA         | ENSG00000173153 | -55  | 0.29 | 0.21 | 0.0058 | 0.083 | NA |
| chr11 | 89224416  | 89224718  | NOX4          | ENSG00000086991 | -71  | 0.42 | 0.26 | 0.0058 | 0.16  | NA |
| chr11 | 2465171   | 2465648   | KCNQ1         | ENSG00000053918 | -505 | 0.32 | 0.21 | 0.0063 | 0.12  | NA |
| chr11 | 67139887  | 67141146  | AP003419.11   | ENSG00000256514 | 539  | 0.25 | 0.17 | 0.0063 | 0.079 | NA |
| chr11 | 128562671 | 128565011 | FLI1          | ENSG00000151702 | -49  | 0.29 | 0.21 | 0.0067 | 0.072 | NA |
| chr11 | 118977878 | 118978785 | C2CD2L        | ENSG00000172375 | 238  | 0.24 | 0.15 | 0.0069 | 0.093 | NA |
| chr11 | 20690579  | 20691845  | NELL1         | ENSG00000165973 | 95   | 0.24 | 0.14 | 0.0071 | 0.098 | NA |
| chr11 | 73498947  | 73499265  | MRPL48        | ENSG00000175581 | 155  | 0.23 | 0.38 | 0.0071 | -0.14 | NA |
| chr11 | 379295    | 380768    | B4GALNT4      | ENSG00000182272 | 49   | 0.96 | 0.92 | 0.0074 | 0.04  | NA |
| chr11 | 1784805   | 1785553   | AC068580.5    | ENSG00000229512 | -200 | 0.36 | 0.21 | 0.0074 | 0.15  | NA |
| chr11 | 67195800  | 67196190  | RPS6KB2       | ENSG00000175634 | 64   | 0.28 | 0.15 | 0.0077 | 0.13  | NA |
| chr11 | 35160375  | 35161000  | CD44          | ENSG00000026508 | 270  | 0.37 | 0.18 | 0.0078 | 0.18  | NA |
| chr11 | 70049099  | 70049806  | FADD          | ENSG00000168040 | 183  | 0.25 | 0.15 | 0.0088 | 0.094 | NA |
| chr11 | 63532453  | 63532700  | C11orf95      | ENSG00000188070 | 858  | 0.91 | 0.72 | 0.0089 | 0.2   | NA |
| chr11 | 93583374  | 93583717  | C11orf90      | ENSG00000214376 | 152  | 0.31 | 0.15 | 0.0093 | 0.16  | NA |
| chr11 | 63535652  | 63537435  | C11orf95      | ENSG00000188070 | -430 | 0.26 | 0.17 | 0.0094 | 0.09  | NA |
| chr11 | 2466247   | 2466818   | KCNQ1         | ENSG00000053918 | -20  | 0.25 | 0.14 | 0.0096 | 0.11  | NA |
| chr11 | 18343625  | 18344238  | HPS5          | ENSG00000110756 | -210 | 0.19 | 0.33 | 0.01   | -0.13 | NA |
| chr11 | 82904478  | 82905660  | RP11-727A23.5 | ENSG00000247137 | -458 | 0.23 | 0.1  | 0.01   | 0.14  | NA |
| chr11 | 17410436  | 17411287  | KCNJ11        | ENSG00000187486 | -229 | 0.37 | 0.21 | 0.011  | 0.16  | NA |
| chr11 | 27740644  | 27741236  | BDNF          | ENSG00000176697 | 354  | 0.41 | 0.17 | 0.011  | 0.24  | NA |



|       |           |           |               |                 |       |      |      |       |       |    |
|-------|-----------|-----------|---------------|-----------------|-------|------|------|-------|-------|----|
| chr11 | 35547139  | 35547396  | PAMR1         | ENSG00000149090 | -122  | 0.37 | 0.2  | 0.011 | 0.17  | NA |
| chr11 | 2883689   | 2884461   | KCNQ1OT1      | ENSG00000229414 | -1277 | 0.35 | 0.25 | 0.012 | 0.11  | NA |
| chr11 | 35639629  | 35641485  | FJX1          | ENSG00000179431 | 822   | 0.27 | 0.2  | 0.012 | 0.07  | NA |
| chr11 | 64058808  | 64060118  | KCNK4         | ENSG00000182450 | 582   | 0.27 | 0.19 | 0.012 | 0.075 | NA |
| chr11 | 66035828  | 66036808  | RAB1B         | ENSG00000174903 | 314   | 0.27 | 0.16 | 0.012 | 0.1   | NA |
| chr11 | 71164097  | 71164680  | NADSYN1       | ENSG00000172890 | 233   | 0.31 | 0.14 | 0.012 | 0.17  | NA |
| chr11 | 85339343  | 85339629  | TMEM126B      | ENSG00000171204 | -143  | 0.3  | 0.13 | 0.012 | 0.17  | NA |
| chr11 | 115630398 | 115631117 | CTC-774J1.2   | ENSG00000246100 | 147   | 0.44 | 0.29 | 0.012 | 0.15  | NA |
| chr11 | 49873117  | 49874152  | RP11-163O19.1 | ENSG00000254714 | 1453  | 0.52 | 0.4  | 0.013 | 0.12  | NA |
| chr11 | 1958934   | 1959247   | TNNT3         | ENSG00000130595 | -340  | 0.4  | 0.65 | 0.014 | -0.25 | NA |
| chr11 | 117102742 | 117103452 | PCSK7         | ENSG00000160613 | -338  | 0.26 | 0.15 | 0.014 | 0.11  | NA |
| chr11 | 2890388   | 2891337   | KCNQ1DN       | ENSG00000237941 | -401  | 0.29 | 0.17 | 0.015 | 0.12  | NA |
| chr11 | 65189463  | 65190295  | NEAT1         | ENSG00000245532 | -366  | 0.25 | 0.17 | 0.015 | 0.08  | NA |
| chr11 | 65769397  | 65770057  | BANF1         | ENSG00000175334 | 177   | 0.18 | 0.29 | 0.015 | -0.11 | NA |
| chr11 | 116661034 | 116661410 | APOA5         | ENSG00000110243 | 1389  | 0.9  | 0.78 | 0.015 | 0.12  | NA |
| chr11 | 67070807  | 67071801  | SSH3          | ENSG00000172830 | 385   | 0.34 | 0.21 | 0.017 | 0.12  | NA |
| chr11 | 124738712 | 124739011 | ROBO3         | ENSG00000154134 | 497   | 0.78 | 0.33 | 0.017 | 0.44  | NA |
| chr11 | 17098839  | 17099506  | RPS13         | ENSG00000110700 | 22    | 0.18 | 0.36 | 0.018 | -0.18 | NA |
| chr11 | 68671107  | 68671982  | MRPL21        | ENSG00000197345 | -290  | 0.29 | 0.2  | 0.018 | 0.094 | NA |
| chr11 | 71497571  | 71499065  | FAM86C        | ENSG00000158483 | -238  | 0.33 | 0.16 | 0.018 | 0.17  | NA |
| chr11 | 118927374 | 118928412 | HYOU1         | ENSG00000149428 | -332  | 0.3  | 0.2  | 0.018 | 0.11  | NA |
| chr11 | 818974    | 820271    | PNPLA2        | ENSG00000177666 | 720   | 0.25 | 0.18 | 0.019 | 0.067 | NA |
| chr11 | 7110132   | 7111376   | RBMXL2        | ENSG00000170748 | 589   | 0.94 | 0.9  | 0.019 | 0.038 | NA |
| chr11 | 34072986  | 34074703  | CAPRN1        | ENSG00000135387 | 614   | 0.28 | 0.2  | 0.019 | 0.072 | NA |
| chr11 | 34378229  | 34379993  | ABTB2         | ENSG00000166016 | -309  | 0.28 | 0.21 | 0.019 | 0.069 | NA |
| chr11 | 46299544  | 46300216  | CREB3L1       | ENSG00000157613 | 652   | 0.49 | 0.28 | 0.02  | 0.21  | NA |
| chr11 | 57102841  | 57103430  | SSRP1         | ENSG00000149136 | -188  | 0.34 | 0.16 | 0.02  | 0.18  | NA |
| chr11 | 57267006  | 57267316  | SLC43A1       | ENSG00000149150 | -11   | 0.46 | 0.19 | 0.02  | 0.27  | NA |
| chr11 | 111945058 | 111945451 | C11orf57      | ENSG00000150776 | 199   | 0.22 | 0.56 | 0.02  | -0.35 | NA |
| chr11 | 61100073  | 61100972  | DDB1          | ENSG00000167986 | -215  | 0.22 | 0.15 | 0.021 | 0.078 | NA |

|       |           |           |               |                 |      |      |      |       |        |    |
|-------|-----------|-----------|---------------|-----------------|------|------|------|-------|--------|----|
| chr11 | 130183948 | 130184668 | ZBTB44        | ENSG00000196323 | 13   | 0.21 | 0.32 | 0.021 | -0.12  | NA |
| chr11 | 626728    | 628037    | SCT           | ENSG00000070031 | -239 | 0.39 | 0.27 | 0.022 | 0.12   | NA |
| chr11 | 63993589  | 63993834  | TRPT1         | ENSG00000149743 | -98  | 1    | 0.15 | 0.022 | 0.85   | NA |
| chr11 | 101980632 | 101982330 | YAP1          | ENSG00000137693 | 289  | 0.26 | 0.2  | 0.022 | 0.064  | NA |
| chr11 | 119181396 | 119181670 | MCAM          | ENSG00000076706 | 51   | 1    | 0.75 | 0.022 | 0.25   | NA |
| chr11 | 43543835  | 43544086  | RP11-513I7.2  | ENSG00000213697 | 374  | 0.82 | 0.93 | 0.024 | -0.11  | NA |
| chr11 | 64948715  | 64949060  | CAPN1         | ENSG00000014216 | 3    | 0.23 | 0.13 | 0.024 | 0.095  | NA |
| chr11 | 560382    | 561397    | RASSF7        | ENSG00000099849 | 485  | 0.26 | 0.17 | 0.026 | 0.095  | NA |
| chr11 | 19798537  | 19798949  | NAV2          | ENSG00000166833 | -270 | 0.38 | 0.16 | 0.026 | 0.22   | NA |
| chr11 | 62313282  | 62314314  | RP11-864I4.4  | ENSG00000257058 | 327  | 0.3  | 0.16 | 0.026 | 0.15   | NA |
| chr11 | 797640    | 798544    | SLC25A22      | ENSG00000177542 | -98  | 0.22 | 0.14 | 0.027 | 0.08   | NA |
| chr11 | 2421040   | 2422474   | TSSC4         | ENSG00000184281 | 39   | 0.25 | 0.17 | 0.027 | 0.073  | NA |
| chr11 | 2930289   | 2931093   | SLC22A18      | ENSG00000110628 | 188  | 0.36 | 0.24 | 0.028 | 0.12   | NA |
| chr11 | 58910127  | 58910584  | FAM111A       | ENSG00000166801 | 134  | 0.15 | 0.45 | 0.028 | -0.31  | NA |
| chr11 | 65382824  | 65383857  | MAP3K11       | ENSG00000173327 | -487 | 0.3  | 0.22 | 0.028 | 0.082  | NA |
| chr11 | 111807607 | 111808203 | DIXDC1        | ENSG00000150764 | -22  | 0.29 | 0.14 | 0.028 | 0.15   | NA |
| chr11 | 85565908  | 85566451  | AP000974.1    | ENSG00000215504 | -193 | 0.48 | 0.22 | 0.029 | 0.26   | NA |
| chr11 | 124932730 | 124933657 | SLC37A2       | ENSG00000134955 | 230  | 0.22 | 0.34 | 0.029 | -0.12  | NA |
| chr11 | 62368454  | 62370491  | MTA2          | ENSG00000149480 | -725 | 0.28 | 0.22 | 0.03  | 0.058  | NA |
| chr11 | 119039429 | 119039944 | NLRX1         | ENSG00000160703 | 249  | 0.39 | 0.23 | 0.03  | 0.17   | NA |
| chr11 | 129910305 | 129910950 | RP11-679I18.4 | ENSG00000255535 | 367  | 0.96 | 0.9  | 0.03  | 0.052  | NA |
| chr11 | 14665053  | 14666674  | PSMA1         | ENSG00000129084 | -700 | 0.24 | 0.17 | 0.031 | 0.072  | NA |
| chr11 | 46939358  | 46940118  | LRP4          | ENSG00000134569 | 435  | 0.26 | 0.15 | 0.031 | 0.1    | NA |
| chr11 | 108535584 | 108536196 | DDX10         | ENSG00000178105 | 138  | 0.16 | 0.24 | 0.031 | -0.089 | NA |
| chr11 | 48001604  | 48003170  | PTPRJ         | ENSG00000149177 | 277  | 0.28 | 0.21 | 0.032 | 0.065  | NA |
| chr11 | 74951647  | 74953491  | CTD-2562J17.4 | ENSG00000255136 | -351 | 0.23 | 0.29 | 0.032 | -0.068 | NA |
| chr11 | 118795950 | 118796819 | BCL9L         | ENSG00000186174 | -67  | 0.33 | 0.2  | 0.032 | 0.13   | NA |
| chr11 | 62554066  | 62555262  | TMEM179B      | ENSG00000185475 | -223 | 0.25 | 0.19 | 0.033 | 0.058  | NA |
| chr11 | 65081937  | 65083333  | CDC42EP2      | ENSG00000149798 | 346  | 0.27 | 0.21 | 0.033 | 0.06   | NA |
| chr11 | 65686287  | 65687554  | C11orf68      | ENSG00000175573 | -387 | 0.25 | 0.17 | 0.033 | 0.083  | NA |

|       |           |           |               |                 |       |      |      |       |        |    |
|-------|-----------|-----------|---------------|-----------------|-------|------|------|-------|--------|----|
| chr11 | 61347808  | 61349038  | SYT7          | ENSG00000011347 | -131  | 0.23 | 0.16 | 0.034 | 0.068  | NA |
| chr11 | 64545666  | 64546684  | SF1           | ENSG00000168066 | -234  | 0.26 | 0.14 | 0.034 | 0.12   | NA |
| chr11 | 1009403   | 1009649   | AP2A2         | ENSG00000183020 | 171   | 0.92 | 0.84 | 0.035 | 0.078  | NA |
| chr11 | 2905023   | 2907024   | CDKN1C        | ENSG00000129757 | -92   | 0.3  | 0.23 | 0.035 | 0.069  | NA |
| chr11 | 44087518  | 44088165  | ACCS          | ENSG00000110455 | 112   | 0.37 | 0.2  | 0.035 | 0.16   | NA |
| chr11 | 59522425  | 59523303  | AP000640.10   | ENSG00000254477 | -416  | 0.3  | 0.21 | 0.035 | 0.085  | NA |
| chr11 | 122753386 | 122753951 | C11orf63      | ENSG00000109944 | 277   | 0.33 | 0.23 | 0.035 | 0.11   | NA |
| chr11 | 126173539 | 126174042 | DCPS          | ENSG00000110063 | 143   | 0.16 | 0.35 | 0.035 | -0.19  | NA |
| chr11 | 134281380 | 134282919 | B3GAT1        | ENSG00000109956 | -337  | 0.31 | 0.23 | 0.036 | 0.08   | NA |
| chr11 | 318361    | 319052    | RP11-326C3.11 | ENSG00000251661 | 66    | 0.32 | 0.14 | 0.038 | 0.19   | NA |
| chr11 | 826941    | 827625    | EFCAB4A       | ENSG00000177685 | 35    | 0.31 | 0.23 | 0.038 | 0.08   | NA |
| chr11 | 6261340   | 6261735   | CNGA4         | ENSG00000132259 | 1215  | 0.92 | 0.99 | 0.038 | -0.068 | NA |
| chr11 | 124669377 | 124670519 | C11orf61      | ENSG00000120458 | 331   | 0.26 | 0.2  | 0.038 | 0.067  | NA |
| chr11 | 22646706  | 22647441  | AC103801.2    | ENSG00000229387 | 213   | 0.24 | 0.13 | 0.039 | 0.11   | NA |
| chr11 | 45671197  | 45672412  | CHST1         | ENSG00000175264 | -620  | 0.93 | 0.86 | 0.039 | 0.075  | NA |
| chr11 | 47447704  | 47448257  | PSMC3         | ENSG00000165916 | -231  | 0.35 | 0.21 | 0.039 | 0.14   | NA |
| chr11 | 129902811 | 129903119 | TCEB2P2       | ENSG00000255262 | 150   | 0.99 | 0.93 | 0.039 | 0.057  | NA |
| chr11 | 3239217   | 3239988   | C11orf36      | ENSG00000236301 | 40    | 0.86 | 0.97 | 0.041 | -0.11  | NA |
| chr11 | 14912900  | 14913771  | CYP2R1        | ENSG00000186104 | -297  | 0.3  | 0.18 | 0.042 | 0.12   | NA |
| chr11 | 118965017 | 118966464 | H2AFX         | ENSG00000188486 | 419   | 0.22 | 0.16 | 0.042 | 0.056  | NA |
| chr11 | 62413632  | 62414293  | GANAB         | ENSG00000089597 | 112   | 0.32 | 0.2  | 0.043 | 0.12   | NA |
| chr11 | 75272950  | 75273616  | SERPINH1      | ENSG00000149257 | 182   | 0.25 | 0.16 | 0.043 | 0.091  | NA |
| chr11 | 102962274 | 102963049 | DCUN1D5       | ENSG00000137692 | -71   | 0.35 | 0.25 | 0.043 | 0.095  | NA |
| chr11 | 131780328 | 131781532 | NTM           | ENSG00000182667 | 217   | 0.24 | 0.18 | 0.043 | 0.064  | NA |
| chr11 | 61159836  | 61160285  | TMEM216       | ENSG00000187049 | 195   | 0.21 | 0.13 | 0.044 | 0.079  | NA |
| chr11 | 64879046  | 64880413  | AP003068.9    | ENSG00000254501 | -562  | 0.25 | 0.18 | 0.044 | 0.071  | NA |
| chr11 | 133906735 | 133907359 | RP11-713P17.4 | ENSG00000254648 | -45   | 0.28 | 0.18 | 0.044 | 0.094  | NA |
| chr11 | 14995128  | 14995908  | CALCA         | ENSG00000110680 | -1618 | 0.29 | 0.19 | 0.046 | 0.1    | NA |
| chr11 | 113644299 | 113644657 | ZW10          | ENSG00000086827 | -65   | 1    | 0.18 | 0.047 | 0.82   | NA |
| chr11 | 122852411 | 122852699 | BSX           | ENSG00000188909 | -127  | 0.7  | 0.52 | 0.047 | 0.17   | NA |

|       |           |           |               |                 |       |      |      |       |        |    |
|-------|-----------|-----------|---------------|-----------------|-------|------|------|-------|--------|----|
| chr11 | 60928560  | 60929262  | VPS37C        | ENSG00000167987 | -303  | 0.17 | 0.11 | 0.048 | 0.052  | NA |
| chr11 | 120434822 | 120435940 | GRIK4         | ENSG00000149403 | 238   | 0.26 | 0.35 | 0.048 | -0.086 | NA |
| chr11 | 2019565   | 2019863   | H19           | ENSG00000130600 | -609  | 0.59 | 0.44 | 0.049 | 0.15   | NA |
| chr11 | 86667041  | 86667289  | RP11-736K20.6 | ENSG00000246523 | 32    | 0.28 | 0.56 | 0.049 | -0.29  | NA |
| chr11 | 15094957  | 15095872  | CALCB         | ENSG00000175868 | 306   | 0.37 | 0.2  | 0.05  | 0.17   | NA |
| chr11 | 118955574 | 118955832 | HMBS          | ENSG00000256269 | 127   | 0.24 | 0.1  | 0.05  | 0.14   | NA |
| chr11 | 10879102  | 10880453  | ZBED5         | ENSG00000236287 | -593  | 0.18 | 0.31 | 0.051 | -0.13  | NA |
| chr11 | 636435    | 636668    | DRD4          | ENSG00000069696 | -742  | 0.95 | 0.82 | 0.052 | 0.13   | NA |
| chr11 | 6255768   | 6256179   | FAM160A2      | ENSG00000051009 | -127  | 0.17 | 0.29 | 0.052 | -0.11  | NA |
| chr11 | 6411346   | 6411913   | SMPD1         | ENSG00000166311 | -26   | 0.36 | 0.21 | 0.052 | 0.15   | NA |
| chr11 | 129765145 | 129765617 | NFRKB         | ENSG00000170322 | 71    | 0.42 | 0.14 | 0.052 | 0.28   | NA |
| chr11 | 8710367   | 8710811   | RPL27A        | ENSG00000166441 | -88   | 0.31 | 0.18 | 0.053 | 0.13   | NA |
| chr11 | 77300360  | 77301391  | AQP11         | ENSG00000178301 | 439   | 0.24 | 0.17 | 0.053 | 0.068  | NA |
| chr11 | 132812662 | 132813075 | OPCML         | ENSG00000183715 | 37    | 0.77 | 0.57 | 0.053 | 0.2    | NA |
| chr11 | 304079    | 304379    | RP11-326C3.4  | ENSG00000255533 | -85   | 0.89 | 0.79 | 0.054 | 0.099  | NA |
| chr11 | 725596    | 726870    | EPS8L2        | ENSG00000177106 | 152   | 0.3  | 0.35 | 0.054 | -0.057 | NA |
| chr11 | 68778569  | 68778851  | AP003071.1    | ENSG00000256508 | -1189 | 0.4  | 0.24 | 0.054 | 0.17   | NA |
| chr11 | 18812572  | 18814079  | PTPN5         | ENSG00000110786 | -138  | 0.28 | 0.2  | 0.055 | 0.08   | NA |
| chr11 | 85374872  | 85376234  | CREBZF        | ENSG00000137504 | -650  | 0.27 | 0.2  | 0.057 | 0.076  | NA |
| chr11 | 70116237  | 70117497  | PPFIA1        | ENSG00000131626 | 61    | 0.25 | 0.19 | 0.058 | 0.06   | NA |
| chr11 | 10472000  | 10472857  | AMPD3         | ENSG00000133805 | 200   | 0.25 | 0.18 | 0.059 | 0.071  | NA |
| chr11 | 10562225  | 10562942  | RNF141        | ENSG00000110315 | -130  | 0.2  | 0.13 | 0.059 | 0.066  | NA |
| chr11 | 57435204  | 57436146  | ZDHHC5        | ENSG00000156599 | 456   | 0.3  | 0.21 | 0.06  | 0.097  | NA |
| chr11 | 126152722 | 126153400 | TIRAP         | ENSG00000150455 | 101   | 0.21 | 0.13 | 0.06  | 0.087  | NA |
| chr11 | 57281671  | 57283305  | SLC43A1       | ENSG00000149150 | -400  | 0.28 | 0.21 | 0.061 | 0.075  | NA |
| chr11 | 71791385  | 71791960  | NUMA1         | ENSG00000137497 | -237  | 0.24 | 0.15 | 0.061 | 0.09   | NA |
| chr11 | 126138359 | 126139166 | SRPR          | ENSG00000182934 | 53    | 0.26 | 0.2  | 0.061 | 0.066  | NA |
| chr11 | 61722744  | 61723483  | BEST1         | ENSG00000167995 | 484   | 0.19 | 0.28 | 0.062 | -0.095 | NA |
| chr11 | 59578090  | 59578379  | MRPL16        | ENSG00000166902 | 12    | 0.27 | 0.14 | 0.063 | 0.13   | NA |
| chr11 | 75140737  | 75141849  | KLHL35        | ENSG00000149243 | -186  | 0.24 | 0.17 | 0.063 | 0.07   | NA |

|       |           |           |            |                 |       |      |      |       |        |    |
|-------|-----------|-----------|------------|-----------------|-------|------|------|-------|--------|----|
| chr11 | 46721979  | 46722428  | ARHGAP1    | ENSG00000175220 | -54   | 0.23 | 0.33 | 0.064 | -0.11  | NA |
| chr11 | 58939046  | 58940308  | DTX4       | ENSG00000110042 | -288  | 0.19 | 0.26 | 0.064 | -0.072 | NA |
| chr11 | 118900986 | 118901749 | SLC37A4    | ENSG00000137700 | 204   | 0.24 | 0.16 | 0.064 | 0.085  | NA |
| chr11 | 3253768   | 3254066   | MIRGPRE    | ENSG00000184350 | -301  | 0.46 | 0.24 | 0.065 | 0.22   | NA |
| chr11 | 6624552   | 6625073   | RRP8       | ENSG00000132275 | -3    | 0.32 | 0.21 | 0.065 | 0.1    | NA |
| chr11 | 69517840  | 69519929  | FGF19      | ENSG00000162344 | 526   | 0.26 | 0.31 | 0.065 | -0.053 | NA |
| chr11 | 67236264  | 67236953  | TMEM134    | ENSG00000172663 | 31    | 0.24 | 0.13 | 0.066 | 0.11   | NA |
| chr11 | 75918741  | 75922084  | WNT11      | ENSG00000085741 | 1362  | 0.24 | 0.21 | 0.066 | 0.038  | NA |
| chr11 | 567938    | 569461    | MIR210     | ENSG00000199038 | -501  | 0.26 | 0.2  | 0.067 | 0.069  | NA |
| chr11 | 115529997 | 115530548 | AP000797.3 | ENSG00000256717 | -104  | 0.28 | 0.19 | 0.068 | 0.088  | NA |
| chr11 | 36397926  | 36399398  | PRR5L      | ENSG00000135362 | 731   | 0.2  | 0.26 | 0.069 | -0.064 | NA |
| chr11 | 72504665  | 72505127  | STARD10    | ENSG00000214530 | -208  | 0.21 | 0.29 | 0.07  | -0.082 | NA |
| chr11 | 82996642  | 82997536  | CCDC90B    | ENSG00000137500 | -82   | 0.21 | 0.5  | 0.07  | -0.29  | NA |
| chr11 | 107461743 | 107462648 | ELMOD1     | ENSG00000110675 | 378   | 0.24 | 0.17 | 0.07  | 0.071  | NA |
| chr11 | 130297401 | 130298517 | ADAMTS8    | ENSG00000134917 | 454   | 0.22 | 0.16 | 0.071 | 0.064  | NA |
| chr11 | 65779311  | 65779767  | CST6       | ENSG00000175315 | 227   | 0.3  | 0.18 | 0.072 | 0.12   | NA |
| chr11 | 66059287  | 66059935  | TMEM151A   | ENSG00000179292 | 270   | 0.24 | 0.18 | 0.072 | 0.067  | NA |
| chr11 | 129243998 | 129244567 | BARX2      | ENSG00000043039 | -1553 | 0.14 | 0.22 | 0.072 | -0.077 | NA |
| chr11 | 3861855   | 3862996   | RHOG       | ENSG00000177105 | -353  | 0.43 | 0.3  | 0.073 | 0.13   | NA |
| chr11 | 694761    | 696375    | DEAF1      | ENSG00000177030 | -637  | 0.25 | 0.19 | 0.079 | 0.057  | NA |
| chr11 | 705794    | 706534    | EPS8L2     | ENSG00000177106 | 51    | 0.32 | 0.21 | 0.079 | 0.11   | NA |
| chr11 | 74394410  | 74394761  | 7SK        | ENSG00000223202 | -1684 | 0.22 | 0.32 | 0.079 | -0.1   | NA |
| chr11 | 506353    | 508009    | RNH1       | ENSG00000023191 | -825  | 0.26 | 0.21 | 0.08  | 0.05   | NA |
| chr11 | 119076641 | 119077277 | CBL        | ENSG00000110395 | 207   | 0.4  | 0.29 | 0.081 | 0.11   | NA |
| chr11 | 10315279  | 10315933  | SBF2       | ENSG00000133812 | 148   | 0.28 | 0.16 | 0.082 | 0.12   | NA |
| chr11 | 65553749  | 65555573  | OVOL1      | ENSG00000172818 | 168   | 0.28 | 0.23 | 0.083 | 0.05   | NA |
| chr11 | 118505508 | 118505741 | PHLDB1     | ENSG00000019144 | -72   | 0.3  | 0.7  | 0.083 | -0.4   | NA |
| chr11 | 68518754  | 68518968  | MTL5       | ENSG00000132749 | 67    | 0.38 | 0.15 | 0.085 | 0.23   | NA |
| chr11 | 75378416  | 75379882  | MAP6       | ENSG00000171533 | 302   | 0.24 | 0.19 | 0.086 | 0.047  | NA |
| chr11 | 63683743  | 63684628  | RCOR2      | ENSG00000167771 | 131   | 0.25 | 0.18 | 0.087 | 0.069  | NA |

|       |           |           |               |                 |       |      |      |       |        |    |
|-------|-----------|-----------|---------------|-----------------|-------|------|------|-------|--------|----|
| chr11 | 67159170  | 67159971  | RAD9A         | ENSG00000172613 | 394   | 0.26 | 0.37 | 0.09  | -0.1   | NA |
| chr11 | 66383571  | 66385047  | RBM14         | ENSG00000239306 | 256   | 0.23 | 0.17 | 0.091 | 0.059  | NA |
| chr11 | 33890357  | 33891495  | LMO2          | ENSG00000135363 | 156   | 0.31 | 0.24 | 0.092 | 0.068  | NA |
| chr11 | 69831571  | 69832484  | RP11-626H12.1 | ENSG00000255191 | 45    | 0.22 | 0.32 | 0.092 | -0.099 | NA |
| chr11 | 62432319  | 62433417  | RP11-831H9.11 | ENSG00000255432 | -218  | 0.21 | 0.27 | 0.094 | -0.06  | NA |
| chr11 | 86511184  | 86511889  | PRSS23        | ENSG00000150687 | 254   | 0.24 | 0.17 | 0.095 | 0.073  | NA |
| chr11 | 22362862  | 22363377  | SLC17A6       | ENSG00000091664 | -1237 | 1    | 0.74 | 0.096 | 0.26   | NA |
| chr11 | 62341228  | 62341695  | EEF1G         | ENSG00000254772 | -129  | 0.27 | 0.1  | 0.096 | 0.17   | NA |
| chr11 | 101453357 | 101454684 | TRPC6         | ENSG00000137672 | 214   | 0.32 | 0.23 | 0.097 | 0.088  | NA |
| chr11 | 62598679  | 62600064  | STX5          | ENSG00000162236 | 132   | 0.3  | 0.22 | 0.099 | 0.088  | NA |
| chr11 | 464450    | 464685    | RP13-317D12.3 | ENSG00000255237 | -668  | 0.99 | 0.92 | 0.1   | 0.065  | NA |
| chr11 | 842293    | 843396    | POLR2L        | ENSG00000177700 | -315  | 0.27 | 0.22 | 0.1   | 0.053  | NA |
| chr11 | 27493640  | 27494357  | LGR4          | ENSG00000205213 | -137  | 0.21 | 0.15 | 0.1   | 0.06   | NA |
| chr11 | 114310001 | 114310586 | REXO2         | ENSG00000076043 | 185   | 0.28 | 0.19 | 0.1   | 0.094  | NA |
| chr11 | 449961    | 451178    | PTDSS2        | ENSG00000174915 | 289   | 0.26 | 0.19 | 0.11  | 0.065  | NA |
| chr11 | 776803    | 777998    | PDDC1         | ENSG00000177225 | -221  | 0.27 | 0.21 | 0.11  | 0.053  | NA |
| chr11 | 4629098   | 4629530   | TRIM68        | ENSG00000167333 | 54    | 0.5  | 0.28 | 0.11  | 0.22   | NA |
| chr11 | 17793276  | 17793959  | KCNC1         | ENSG00000129159 | -1481 | 0.95 | 0.76 | 0.11  | 0.19   | NA |
| chr11 | 31531131  | 31531501  | IMMP1L        | ENSG00000148950 | -177  | 0.19 | 0.08 | 0.11  | 0.12   | NA |
| chr11 | 43702016  | 43702597  | HSD17B12      | ENSG00000149084 | 76    | 0.29 | 0.22 | 0.11  | 0.076  | NA |
| chr11 | 47788200  | 47789022  | FNBP4         | ENSG00000109920 | 227   | 0.31 | 0.24 | 0.11  | 0.067  | NA |
| chr11 | 63685489  | 63685968  | RCOR2         | ENSG00000167771 | -1412 | 0.24 | 0.36 | 0.11  | -0.12  | NA |
| chr11 | 64008283  | 64009487  | FKBP2         | ENSG00000173486 | 410   | 0.23 | 0.18 | 0.11  | 0.046  | NA |
| chr11 | 64409877  | 64411253  | NRXN2         | ENSG00000110076 | -407  | 0.28 | 0.21 | 0.11  | 0.065  | NA |
| chr11 | 65837254  | 65838649  | PACS1         | ENSG00000175115 | 117   | 0.24 | 0.19 | 0.11  | 0.055  | NA |
| chr11 | 66083572  | 66083782  | CD248         | ENSG00000174807 | 838   | 0.81 | 0.89 | 0.11  | -0.086 | NA |
| chr11 | 67250344  | 67250864  | AIP           | ENSG00000110711 | 92    | 0.2  | 0.3  | 0.11  | -0.098 | NA |
| chr11 | 68608155  | 68609419  | CPT1A         | ENSG00000110090 | 597   | 0.26 | 0.2  | 0.11  | 0.063  | NA |
| chr11 | 71954816  | 71955659  | PHOX2A        | ENSG00000165462 | -17   | 0.27 | 0.21 | 0.11  | 0.059  | NA |
| chr11 | 111169304 | 111170428 | C11orf93      | ENSG00000214290 | 301   | 0.33 | 0.4  | 0.11  | -0.069 | NA |

|       |           |           |               |                 |      |      |      |      |        |    |
|-------|-----------|-----------|---------------|-----------------|------|------|------|------|--------|----|
| chr11 | 129245108 | 129246395 | BARX2         | ENSG00000043039 | -84  | 0.34 | 0.27 | 0.11 | 0.079  | NA |
| chr11 | 3601851   | 3602616   | RP13-726E6.2  | ENSG00000255367 | 208  | 0.39 | 0.24 | 0.12 | 0.16   | NA |
| chr11 | 8615397   | 8615889   | STK33         | ENSG00000130413 | -140 | 0.3  | 0.18 | 0.12 | 0.12   | NA |
| chr11 | 17373019  | 17373665  | RP1-239B22.1  | ENSG00000188211 | 69   | 0.2  | 0.13 | 0.12 | 0.075  | NA |
| chr11 | 17801026  | 17801277  | KCNC1         | ENSG00000129159 | 432  | 0.96 | 0.84 | 0.12 | 0.12   | NA |
| chr11 | 49913319  | 49914335  | RP11-163O19.8 | ENSG00000255111 | 1502 | 0.29 | 0.41 | 0.12 | -0.12  | NA |
| chr11 | 61594996  | 61596710  | FADS2         | ENSG00000134824 | 620  | 0.25 | 0.2  | 0.12 | 0.058  | NA |
| chr11 | 63952677  | 63954228  | STIP1         | ENSG00000168439 | 708  | 0.2  | 0.16 | 0.12 | 0.048  | NA |
| chr11 | 66138806  | 66139729  | SLC29A2       | ENSG00000174669 | -149 | 0.26 | 0.2  | 0.12 | 0.065  | NA |
| chr11 | 67188087  | 67188879  | CARNS1        | ENSG00000172508 | -96  | 0.36 | 0.22 | 0.12 | 0.14   | NA |
| chr11 | 74699815  | 74700186  | NEU3          | ENSG00000162139 | 30   | 0.29 | 0.16 | 0.12 | 0.13   | NA |
| chr11 | 133938850 | 133939681 | JAM3          | ENSG00000166086 | 299  | 0.26 | 0.2  | 0.12 | 0.064  | NA |
| chr11 | 279072    | 281700    | NLRP6         | ENSG00000174885 | 1327 | 0.26 | 0.23 | 0.13 | 0.032  | NA |
| chr11 | 9594346   | 9596536   | WEE1          | ENSG00000166483 | 213  | 0.24 | 0.2  | 0.13 | 0.047  | NA |
| chr11 | 63381143  | 63382096  | PLA2G16       | ENSG00000176485 | 11   | 0.31 | 0.25 | 0.13 | 0.067  | NA |
| chr11 | 67797802  | 67798413  | RP5-901A4.1   | ENSG00000255306 | -179 | 0.26 | 0.17 | 0.13 | 0.083  | NA |
| chr11 | 111472723 | 111473939 | SIK2          | ENSG00000170145 | 216  | 0.21 | 0.16 | 0.13 | 0.047  | NA |
| chr11 | 18655811  | 18656482  | SPTY2D1       | ENSG00000179119 | -210 | 0.14 | 0.25 | 0.14 | -0.11  | NA |
| chr11 | 34460165  | 34460857  | CAT           | ENSG00000121691 | 39   | 0.36 | 0.2  | 0.14 | 0.17   | NA |
| chr11 | 62493994  | 62495127  | HNRNPUL2      | ENSG00000214753 | 261  | 0.15 | 0.22 | 0.14 | -0.067 | NA |
| chr11 | 64781450  | 64782385  | ARL2          | ENSG00000213465 | 332  | 0.28 | 0.21 | 0.14 | 0.074  | NA |
| chr11 | 75136407  | 75136689  | KLHL35        | ENSG00000149243 | -607 | 0.96 | 0.88 | 0.14 | 0.074  | NA |
| chr11 | 78127965  | 78129400  | GAB2          | ENSG00000033327 | 135  | 0.23 | 0.18 | 0.14 | 0.046  | NA |
| chr11 | 112832524 | 112834490 | RP11-629G13.1 | ENSG00000247416 | 675  | 0.25 | 0.2  | 0.14 | 0.056  | NA |
| chr11 | 120894689 | 120895082 | TBCEL         | ENSG00000154114 | 104  | 0.25 | 0.17 | 0.14 | 0.085  | NA |
| chr11 | 124790814 | 124791354 | HEPN1         | ENSG00000221932 | 1944 | 0.34 | 0.27 | 0.14 | 0.071  | NA |
| chr11 | 45376931  | 45377243  | RP11-430H10.1 | ENSG00000254427 | 36   | 0.34 | 0.5  | 0.15 | -0.16  | NA |
| chr11 | 65479349  | 65480024  | KAT5          | ENSG00000172977 | 219  | 0.36 | 0.45 | 0.15 | -0.085 | NA |
| chr11 | 66725503  | 66726373  | PC            | ENSG00000173599 | -123 | 0.24 | 0.19 | 0.15 | 0.051  | NA |
| chr11 | 77850482  | 77850845  | ALG8          | ENSG00000159063 | -25  | 0.29 | 0.07 | 0.15 | 0.22   | NA |

|       |           |           |               |                 |      |      |      |      |        |    |
|-------|-----------|-----------|---------------|-----------------|------|------|------|------|--------|----|
| chr11 | 109293519 | 109294983 | C11orf87      | ENSG00000185742 | 1405 | 0.26 | 0.19 | 0.15 | 0.077  | NA |
| chr11 | 3663052   | 3663802   | ART5          | ENSG00000167311 | -205 | 0.26 | 0.19 | 0.16 | 0.074  | NA |
| chr11 | 18415922  | 18416680  | LDHA          | ENSG00000134333 | 366  | 0.3  | 0.25 | 0.16 | 0.051  | NA |
| chr11 | 49914943  | 49915372  | RP11-163O19.8 | ENSG00000255111 | 172  | 0.73 | 0.8  | 0.16 | -0.078 | NA |
| chr11 | 61891198  | 61891726  | INCENP        | ENSG00000149503 | 17   | 0.29 | 0.22 | 0.16 | 0.067  | NA |
| chr11 | 63885581  | 63885788  | RP11-21A7A.3  | ENSG00000256341 | 998  | 0.96 | 0.84 | 0.16 | 0.12   | NA |
| chr11 | 64570248  | 64570901  | MAP4K2        | ENSG00000168067 | -92  | 0.22 | 0.18 | 0.16 | 0.048  | NA |
| chr11 | 117856638 | 117857298 | IL10RA        | ENSG00000110324 | -95  | 0.18 | 0.29 | 0.16 | -0.11  | NA |
| chr11 | 119292689 | 119292891 | THY1          | ENSG00000154096 | 482  | 0.23 | 0.34 | 0.16 | -0.1   | NA |
| chr11 | 120008046 | 120008710 | TRIM29        | ENSG00000137699 | 444  | 0.88 | 0.94 | 0.16 | -0.06  | NA |
| chr11 | 10772493  | 10773089  | CTR9          | ENSG00000198730 | 257  | 0.23 | 0.17 | 0.17 | 0.053  | NA |
| chr11 | 27527863  | 27528517  | LIN7C         | ENSG00000148943 | 126  | 0.71 | 0.47 | 0.17 | 0.24   | NA |
| chr11 | 58873889  | 58874486  | FAM111B       | ENSG00000189057 | -471 | 0.43 | 0.1  | 0.17 | 0.33   | NA |
| chr11 | 65222490  | 65222750  | AP000769.1    | ENSG00000173727 | -108 | 1    | 0.2  | 0.17 | 0.8    | NA |
| chr11 | 82443435  | 82444976  | FAM181B       | ENSG00000182103 | 701  | 0.22 | 0.18 | 0.17 | 0.037  | NA |
| chr11 | 94822597  | 94823611  | ENDOD1        | ENSG00000149218 | 130  | 0.22 | 0.17 | 0.17 | 0.047  | NA |
| chr11 | 116643309 | 116643892 | BUD13         | ENSG00000137656 | 103  | 0.29 | 0.22 | 0.17 | 0.072  | NA |
| chr11 | 2398223   | 2399598   | CD81          | ENSG00000110651 | 386  | 0.27 | 0.21 | 0.18 | 0.059  | NA |
| chr11 | 9335730   | 9336477   | TMEM41B       | ENSG00000166471 | 11   | 0.19 | 0.12 | 0.18 | 0.069  | NA |
| chr11 | 17034843  | 17036404  | PLEKHA7       | ENSG00000166689 | -734 | 0.25 | 0.21 | 0.18 | 0.042  | NA |
| chr11 | 20622720  | 20623399  | SLC6A5        | ENSG00000165970 | 1919 | 0.3  | 0.24 | 0.18 | 0.061  | NA |
| chr11 | 43333439  | 43333887  | API5          | ENSG00000166181 | 150  | 0.44 | 0.28 | 0.18 | 0.17   | NA |
| chr11 | 65816404  | 65816665  | GAL3ST3       | ENSG00000175229 | 88   | 0.39 | 0.29 | 0.18 | 0.095  | NA |
| chr11 | 70508328  | 70508617  | SHANK2        | ENSG00000162105 | -527 | 0.36 | 0.25 | 0.18 | 0.11   | NA |
| chr11 | 74108894  | 74109937  | PGM2L1        | ENSG00000165434 | 38   | 0.25 | 0.19 | 0.18 | 0.056  | NA |
| chr11 | 75236189  | 75237781  | GDPD5         | ENSG00000158555 | -684 | 0.26 | 0.21 | 0.18 | 0.049  | NA |
| chr11 | 100557923 | 100558401 | ARHGAP42      | ENSG00000165895 | -222 | 0.3  | 0.21 | 0.18 | 0.09   | NA |
| chr11 | 111383168 | 111383892 | MIR34B        | ENSG00000207811 | -133 | 0.29 | 0.21 | 0.18 | 0.079  | NA |
| chr11 | 129148497 | 129149917 | ARHGAP32      | ENSG00000134909 | 12   | 0.28 | 0.22 | 0.18 | 0.065  | NA |
| chr11 | 1311351   | 1311619   | TOLLIP        | ENSG00000078902 | 1915 | 0.91 | 0.62 | 0.19 | 0.29   | NA |



|       |           |           |               |                 |       |      |      |      |        |    |
|-------|-----------|-----------|---------------|-----------------|-------|------|------|------|--------|----|
| chr11 | 18034129  | 18035268  | SERGEF        | ENSG00000129158 | -253  | 0.25 | 0.2  | 0.19 | 0.047  | NA |
| chr11 | 22688285  | 22688617  | GAS2          | ENSG00000148935 | -171  | 0.21 | 0.31 | 0.19 | -0.095 | NA |
| chr11 | 46368650  | 46369660  | DGKZ          | ENSG00000149091 | 199   | 0.27 | 0.31 | 0.19 | -0.038 | NA |
| chr11 | 67383537  | 67383809  | DOC2GP        | ENSG00000231793 | 55    | 0.18 | 0.33 | 0.19 | -0.16  | NA |
| chr11 | 89520089  | 89521109  | RP11-358N4.3  | ENSG00000255162 | 1486  | 0.33 | 0.2  | 0.19 | 0.13   | NA |
| chr11 | 94134226  | 94134848  | GPR83         | ENSG00000123901 | 21    | 0.19 | 0.25 | 0.19 | -0.063 | NA |
| chr11 | 111410932 | 111412199 | LAYN          | ENSG00000204381 | 560   | 0.29 | 0.21 | 0.19 | 0.073  | NA |
| chr11 | 117049399 | 117050234 | SIDT2         | ENSG00000149577 | 367   | 0.34 | 0.21 | 0.19 | 0.13   | NA |
| chr11 | 123065426 | 123066184 | CLMP          | ENSG00000166250 | 184   | 0.37 | 0.29 | 0.19 | 0.079  | NA |
| chr11 | 1595809   | 1596143   | RP13-25N22.1  | ENSG00000233930 | 1097  | 0.27 | 0.15 | 0.2  | 0.11   | NA |
| chr11 | 1978152   | 1978427   | MRPL23        | ENSG00000214026 | 1482  | 0.96 | 0.91 | 0.2  | 0.058  | NA |
| chr11 | 15136058  | 15136545  | INSC          | ENSG00000188487 | -183  | 1    | 0.62 | 0.2  | 0.38   | NA |
| chr11 | 16634957  | 16635969  | C11orf58      | ENSG00000110696 | 784   | 0.24 | 0.18 | 0.2  | 0.06   | NA |
| chr11 | 46260617  | 46260945  | CTD-2589M5.5  | ENSG00000254639 | 848   | 0.21 | 0.12 | 0.2  | 0.091  | NA |
| chr11 | 62138621  | 62138873  | CTD-2531D15.1 | ENSG00000254454 | 129   | 0.94 | 0.86 | 0.2  | 0.077  | NA |
| chr11 | 77184193  | 77185504  | PAK1          | ENSG00000149269 | -308  | 0.24 | 0.31 | 0.2  | -0.066 | NA |
| chr11 | 93275814  | 93276721  | C11orf75      | ENSG00000166002 | 254   | 0.28 | 0.22 | 0.2  | 0.058  | NA |
| chr11 | 94963753  | 94964573  | SESN3         | ENSG00000149212 | 47    | 0.21 | 0.17 | 0.2  | 0.042  | NA |
| chr11 | 110166564 | 110167759 | RDX           | ENSG00000137710 | 161   | 0.23 | 0.19 | 0.2  | 0.043  | NA |
| chr11 | 134093696 | 134095491 | NCAPD3        | ENSG00000151503 | -758  | 0.26 | 0.23 | 0.2  | 0.036  | NA |
| chr11 | 288847    | 289239    | ATHL1         | ENSG00000142102 | -92   | 0.28 | 0.16 | 0.21 | 0.12   | NA |
| chr11 | 72492281  | 72492644  | STARD10       | ENSG00000214530 | -301  | 0.17 | 0.23 | 0.21 | -0.059 | NA |
| chr11 | 101918073 | 101918493 | C11orf70      | ENSG00000137691 | 109   | 0.39 | 0.25 | 0.21 | 0.14   | NA |
| chr11 | 45201783  | 45202728  | PRDM11        | ENSG00000019485 | -1173 | 0.23 | 0.19 | 0.22 | 0.043  | NA |
| chr11 | 62539001  | 62539322  | TAF6L         | ENSG00000162227 | 286   | 0.18 | 0.5  | 0.22 | -0.32  | NA |
| chr11 | 62572710  | 62573149  | NXF1          | ENSG00000162231 | -28   | 0.31 | 0.24 | 0.22 | 0.07   | NA |
| chr11 | 70244288  | 70245001  | AP000487.5    | ENSG00000246889 | -236  | 0.25 | 0.2  | 0.22 | 0.048  | NA |
| chr11 | 85358865  | 85359226  | TMEM126A      | ENSG00000171202 | 34    | 0.17 | 0.24 | 0.22 | -0.071 | NA |
| chr11 | 123524733 | 123525685 | SCN3B         | ENSG00000166257 | 103   | 0.3  | 0.23 | 0.22 | 0.071  | NA |
| chr11 | 1968558   | 1969003   | MRPL23        | ENSG00000214026 | 218   | 0.17 | 0.11 | 0.23 | 0.056  | NA |

|       |           |           |                |                 |      |      |      |      |        |    |
|-------|-----------|-----------|----------------|-----------------|------|------|------|------|--------|----|
| chr11 | 14379808  | 14380737  | RRAS2          | ENSG00000133818 | -241 | 0.25 | 0.21 | 0.23 | 0.045  | NA |
| chr11 | 50227031  | 50227326  | RP11-347H15.2  | ENSG00000255500 | -154 | 0.77 | 0.71 | 0.23 | 0.064  | NA |
| chr11 | 64808330  | 64809264  | SAC3D1         | ENSG00000168061 | 424  | 0.18 | 0.15 | 0.23 | 0.033  | NA |
| chr11 | 112097022 | 112097547 | PTS            | ENSG00000150787 | 196  | 0.22 | 0.28 | 0.23 | -0.059 | NA |
| chr11 | 119598382 | 119600157 | PVRL1          | ENSG00000110400 | -6   | 0.19 | 0.23 | 0.23 | -0.041 | NA |
| chr11 | 8932573   | 8933294   | AKIP1          | ENSG00000166452 | 247  | 0.23 | 0.16 | 0.24 | 0.072  | NA |
| chr11 | 46259264  | 46260048  | CTD-2589M5.5   | ENSG00000254639 | -277 | 0.3  | 0.24 | 0.24 | 0.061  | NA |
| chr11 | 49229717  | 49230040  | FOLH1          | ENSG00000086205 | 1    | 0.4  | 1    | 0.24 | -0.6   | NA |
| chr11 | 67260413  | 67262715  | PITPNM1        | ENSG00000110697 | 852  | 0.9  | 0.93 | 0.24 | -0.025 | NA |
| chr11 | 67374150  | 67374726  | C11orf72       | ENSG00000184224 | -261 | 0.13 | 0.18 | 0.24 | -0.052 | NA |
| chr11 | 70672834  | 70673055  | SHANK2         | ENSG00000162105 | -82  | 0.17 | 0.24 | 0.24 | -0.068 | NA |
| chr11 | 72463092  | 72463717  | ARAP1          | ENSG00000186635 | 44   | 0.34 | 0.26 | 0.24 | 0.081  | NA |
| chr11 | 116968849 | 116969512 | SIK3           | ENSG00000160584 | -193 | 0.24 | 0.2  | 0.24 | 0.043  | NA |
| chr11 | 125462323 | 125462884 | RP11-791J7.2   | ENSG00000254671 | -140 | 0.4  | 0.24 | 0.24 | 0.16   | NA |
| chr11 | 4208448   | 4209153   | RP11-23F23.2   | ENSG00000254480 | 430  | 0.19 | 0.24 | 0.25 | -0.051 | NA |
| chr11 | 64001572  | 64002712  | RP11-783K16.14 | ENSG00000256116 | -378 | 0.21 | 0.25 | 0.25 | -0.043 | NA |
| chr11 | 125365137 | 125366319 | FEZ1           | ENSG00000149557 | -167 | 0.23 | 0.18 | 0.25 | 0.042  | NA |
| chr11 | 129685737 | 129686211 | TMEM45B        | ENSG00000151715 | 229  | 0.35 | 0.21 | 0.25 | 0.13   | NA |
| chr11 | 69489754  | 69490329  | ORAOV1         | ENSG00000149716 | -26  | 0.38 | 0.31 | 0.26 | 0.076  | NA |
| chr11 | 75525711  | 75525916  | RP11-535A19.2  | ENSG00000255507 | 29   | 0.22 | 0.15 | 0.26 | 0.066  | NA |
| chr11 | 124609552 | 124610471 | NRGN           | ENSG00000154146 | 182  | 0.27 | 0.21 | 0.26 | 0.063  | NA |
| chr11 | 35440375  | 35441882  | RP4-683L5.1    | ENSG00000255542 | 524  | 0.22 | 0.26 | 0.27 | -0.036 | NA |
| chr11 | 46164651  | 46164852  | RP11-702F3.2   | ENSG00000254871 | 484  | 0.91 | 0.8  | 0.27 | 0.11   | NA |
| chr11 | 46638637  | 46639486  | HARBI1         | ENSG00000180423 | -284 | 0.21 | 0.15 | 0.27 | 0.064  | NA |
| chr11 | 62623359  | 62623877  | SNHG1          | ENSG00000255717 | -232 | 0.19 | 0.13 | 0.27 | 0.062  | NA |
| chr11 | 71159014  | 71159831  | DHCR7          | ENSG00000172893 | -298 | 0.21 | 0.15 | 0.27 | 0.058  | NA |
| chr11 | 77705600  | 77706035  | INTS4          | ENSG00000149262 | -118 | 0.24 | 0.16 | 0.27 | 0.084  | NA |
| chr11 | 114270799 | 114271690 | C11orf71       | ENSG00000180425 | -105 | 0.24 | 0.16 | 0.27 | 0.08   | NA |
| chr11 | 125932082 | 125933003 | CDON           | ENSG00000064309 | 164  | 0.16 | 0.21 | 0.27 | -0.046 | NA |
| chr11 | 133825337 | 133827457 | IGSF9B         | ENSG00000080854 | 483  | 0.25 | 0.28 | 0.27 | -0.035 | NA |

|       |           |           |               |                 |       |      |      |      |        |    |
|-------|-----------|-----------|---------------|-----------------|-------|------|------|------|--------|----|
| chr11 | 611691    | 611943    | IRF7          | ENSG00000185507 | 1774  | 0.8  | 0.87 | 0.28 | -0.078 | NA |
| chr11 | 65819367  | 65820224  | SF3B2         | ENSG00000087365 | -7    | 0.26 | 0.32 | 0.28 | -0.057 | NA |
| chr11 | 73018452  | 73020563  | ARHGEF17      | ENSG00000110237 | 173   | 0.37 | 0.33 | 0.28 | 0.04   | NA |
| chr11 | 75526396  | 75526926  | RP11-535A19.2 | ENSG00000255507 | -210  | 0.22 | 0.18 | 0.28 | 0.041  | NA |
| chr11 | 110300574 | 110301334 | FDX1          | ENSG00000137714 | 347   | 0.2  | 0.17 | 0.28 | 0.032  | NA |
| chr11 | 118888878 | 118890115 | RPS25         | ENSG00000118181 | -456  | 0.26 | 0.35 | 0.28 | -0.095 | NA |
| chr11 | 124632063 | 124633239 | ESAM          | ENSG00000149564 | -475  | 0.19 | 0.15 | 0.28 | 0.043  | NA |
| chr11 | 132813562 | 132814395 | OPCML         | ENSG00000183715 | -412  | 0.23 | 0.31 | 0.28 | -0.074 | NA |
| chr11 | 575464    | 577093    | AP006284.1    | ENSG00000246532 | -393  | 0.33 | 0.27 | 0.29 | 0.061  | NA |
| chr11 | 30038522  | 30038823  | KCNA4         | ENSG00000182255 | -102  | 0.29 | 0.19 | 0.29 | 0.094  | NA |
| chr11 | 34380488  | 34380710  | ABTB2         | ENSG00000166016 | -1044 | 0.23 | 0.15 | 0.29 | 0.074  | NA |
| chr11 | 44586602  | 44587404  | CD82          | ENSG00000085117 | -138  | 0.25 | 0.21 | 0.29 | 0.048  | NA |
| chr11 | 63580537  | 63581740  | C11orf84      | ENSG00000168005 | 278   | 0.32 | 0.27 | 0.3  | 0.045  | NA |
| chr11 | 74459858  | 74460558  | RNF169        | ENSG00000166439 | 295   | 0.24 | 0.17 | 0.3  | 0.062  | NA |
| chr11 | 75139454  | 75139817  | KLHL35        | ENSG00000149243 | 1472  | 0.28 | 0.23 | 0.3  | 0.053  | NA |
| chr11 | 111741953 | 111742292 | ALG9          | ENSG00000086848 | -116  | 0.2  | 0.28 | 0.3  | -0.081 | NA |
| chr11 | 126225355 | 126226073 | AP001318.3    | ENSG00000247445 | -283  | 0.24 | 0.31 | 0.3  | -0.063 | NA |
| chr11 | 71934247  | 71936321  | INPPL1        | ENSG00000165458 | 539   | 0.24 | 0.21 | 0.31 | 0.031  | NA |
| chr11 | 111385337 | 111385712 | C11orf88      | ENSG00000183644 | 14    | 0.21 | 0.27 | 0.31 | -0.061 | NA |
| chr11 | 117186344 | 117186979 | BACE1         | ENSG00000186318 | -150  | 0.25 | 0.32 | 0.31 | -0.068 | NA |
| chr11 | 119234480 | 119235214 | USP2          | ENSG00000036672 | -223  | 0.27 | 0.22 | 0.31 | 0.049  | NA |
| chr11 | 17229114  | 17229833  | PIK3C2A       | ENSG00000011405 | -6    | 0.21 | 0.16 | 0.32 | 0.054  | NA |
| chr11 | 45686160  | 45687495  | CHST1         | ENSG00000175264 | 317   | 0.19 | 0.22 | 0.32 | -0.028 | NA |
| chr11 | 65153726  | 65154606  | FRMD8         | ENSG00000126391 | 96    | 0.26 | 0.21 | 0.32 | 0.044  | NA |
| chr11 | 70962173  | 70964161  | SHANK2        | ENSG00000162105 | 456   | 0.27 | 0.24 | 0.32 | 0.028  | NA |
| chr11 | 77899564  | 77899990  | KCTD21        | ENSG00000188997 | -143  | 0.25 | 0.21 | 0.32 | 0.044  | NA |
| chr11 | 117014699 | 117015560 | RP11-109L13.5 | ENSG00000254678 | -222  | 0.26 | 0.21 | 0.33 | 0.055  | NA |
| chr11 | 3400155   | 3400419   | ZNF195        | ENSG00000005801 | 43    | 0.26 | 0.18 | 0.34 | 0.082  | NA |
| chr11 | 63974829  | 63975048  | FERMT3        | ENSG00000149781 | -351  | 0.85 | 1    | 0.34 | -0.15  | NA |
| chr11 | 85779725  | 85780397  | PICALM        | ENSG00000073921 | -239  | 0.26 | 0.21 | 0.34 | 0.052  | NA |

|       |           |           |               |                 |       |      |      |      |        |    |
|-------|-----------|-----------|---------------|-----------------|-------|------|------|------|--------|----|
| chr11 | 119205023 | 119205568 | RNF26         | ENSG00000173456 | 58    | 0.26 | 0.21 | 0.34 | 0.057  | NA |
| chr11 | 18610010  | 18610463  | UEVLD         | ENSG00000151116 | -15   | 0.32 | 0.26 | 0.35 | 0.059  | NA |
| chr11 | 59382687  | 59382929  | OSBP          | ENSG00000110048 | 329   | 0.18 | 0.24 | 0.35 | -0.056 | NA |
| chr11 | 62473453  | 62474156  | BSCL2         | ENSG00000168000 | -114  | 0.28 | 0.22 | 0.35 | 0.062  | NA |
| chr11 | 66035216  | 66035447  | RP11-867G23.2 | ENSG00000254762 | 269   | 0.33 | 0.16 | 0.35 | 0.17   | NA |
| chr11 | 118991886 | 118992751 | HINFP         | ENSG00000172273 | 21    | 0.25 | 0.2  | 0.35 | 0.05   | NA |
| chr11 | 124492664 | 124493153 | TBRG1         | ENSG00000154144 | 176   | 0.2  | 0.17 | 0.35 | 0.034  | NA |
| chr11 | 396685    | 397462    | PKP3          | ENSG00000184363 | -299  | 0.22 | 0.26 | 0.36 | -0.042 | NA |
| chr11 | 35684421  | 35684846  | TRIM44        | ENSG00000166326 | 280   | 0.31 | 0.25 | 0.36 | 0.059  | NA |
| chr11 | 61129221  | 61129879  | CYBASC3       | ENSG00000162144 | -238  | 0.22 | 0.17 | 0.36 | 0.048  | NA |
| chr11 | 1892037   | 1892556   | LSP1          | ENSG00000130592 | 180   | 0.23 | 0.16 | 0.37 | 0.071  | NA |
| chr11 | 30037672  | 30037944  | KCNA4         | ENSG00000182255 | 98    | 0.25 | 0.67 | 0.37 | -0.42  | NA |
| chr11 | 67182965  | 67183393  | CARNS1        | ENSG00000172508 | 30    | 0.25 | 0.19 | 0.37 | 0.066  | NA |
| chr11 | 73308799  | 73309500  | FAM168A       | ENSG00000054965 | -6    | 0.22 | 0.18 | 0.37 | 0.039  | NA |
| chr11 | 86382695  | 86383586  | ME3           | ENSG00000151376 | -276  | 0.26 | 0.19 | 0.37 | 0.067  | NA |
| chr11 | 121163244 | 121163952 | SC5DL         | ENSG00000109929 | 208   | 0.28 | 0.2  | 0.37 | 0.079  | NA |
| chr11 | 125439122 | 125439730 | EI24          | ENSG00000149547 | 250   | 0.15 | 0.2  | 0.37 | -0.047 | NA |
| chr11 | 65337213  | 65338474  | SSSCA1        | ENSG00000173465 | -58   | 0.22 | 0.2  | 0.38 | 0.026  | NA |
| chr11 | 77790478  | 77791101  | NDUFC2        | ENSG00000151366 | 76    | 0.3  | 0.26 | 0.38 | 0.041  | NA |
| chr11 | 119186947 | 119187894 | MCAM          | ENSG00000076706 | 132   | 0.24 | 0.3  | 0.38 | -0.053 | NA |
| chr11 | 130318234 | 130320198 | ADAMTS15      | ENSG00000166106 | 347   | 0.24 | 0.2  | 0.38 | 0.036  | NA |
| chr11 | 9482109   | 9483152   | ZNF143        | ENSG00000166478 | 118   | 0.27 | 0.23 | 0.39 | 0.046  | NA |
| chr11 | 17740789  | 17743779  | MYOD1         | ENSG00000129152 | 1169  | 0.2  | 0.22 | 0.39 | -0.019 | NA |
| chr11 | 33278657  | 33280175  | HIPK3         | ENSG00000110422 | 283   | 0.27 | 0.24 | 0.39 | 0.027  | NA |
| chr11 | 74303529  | 74304040  | POLD3         | ENSG00000077514 | 209   | 0.22 | 0.35 | 0.39 | -0.12  | NA |
| chr11 | 125034896 | 125036426 | PKNOX2        | ENSG00000165495 | 1011  | 0.23 | 0.2  | 0.39 | 0.029  | NA |
| chr11 | 1471339   | 1471595   | BRSK2         | ENSG00000174672 | -448  | 0.78 | 0.54 | 0.4  | 0.24   | NA |
| chr11 | 3435033   | 3435239   | AC123788.1    | ENSG00000182139 | -1016 | 0.88 | 0.94 | 0.4  | -0.063 | NA |
| chr11 | 44748205  | 44749761  | TSPAN18       | ENSG00000157570 | 622   | 0.26 | 0.23 | 0.4  | 0.029  | NA |
| chr11 | 64013772  | 64015341  | PPP1R14B      | ENSG00000173457 | -143  | 0.18 | 0.21 | 0.4  | -0.037 | NA |

|       |           |           |                   |                 |      |      |      |      |        |    |
|-------|-----------|-----------|-------------------|-----------------|------|------|------|------|--------|----|
| chr11 | 64901526  | 64902107  | SYVN1             | ENSG00000162298 | 84   | 0.27 | 0.21 | 0.4  | 0.057  | NA |
| chr11 | 113345068 | 113346328 | DRD2              | ENSG00000149295 | 144  | 0.22 | 0.19 | 0.4  | 0.027  | NA |
| chr11 | 118868641 | 118869204 | RP11-110I1.12     | ENSG00000255121 | -208 | 0.38 | 0.23 | 0.4  | 0.16   | NA |
| chr11 | 12029737  | 12030841  | DKK3              | ENSG00000050165 | -159 | 0.2  | 0.24 | 0.41 | -0.042 | NA |
| chr11 | 43902254  | 43902528  | RP11-613D13.5     | ENSG00000246250 | -115 | 0.2  | 0.29 | 0.41 | -0.089 | NA |
| chr11 | 94706291  | 94707060  | CWC15             | ENSG00000150316 | 33   | 0.38 | 0.59 | 0.41 | -0.21  | NA |
| chr11 | 98891543  | 98891821  | CNTN5             | ENSG00000149972 | -1   | 0.23 | 0.16 | 0.41 | 0.072  | NA |
| chr11 | 3443245   | 3444896   | AC123788.4        | ENSG00000166492 | -344 | 0.19 | 0.23 | 0.42 | -0.047 | NA |
| chr11 | 13484273  | 13485290  | BTBD10            | ENSG00000148925 | -54  | 0.24 | 0.19 | 0.42 | 0.046  | NA |
| chr11 | 19138497  | 19139216  | ZDHHC13           | ENSG00000177054 | 210  | 0.24 | 0.27 | 0.42 | -0.038 | NA |
| chr11 | 289771    | 290010    | ATHL1             | ENSG00000142102 | -30  | 0.85 | 0.9  | 0.43 | -0.048 | NA |
| chr11 | 2154033   | 2154387   | MIR483            | ENSG00000207805 | 1229 | 0.22 | 0.29 | 0.43 | -0.068 | NA |
| chr11 | 3829696   | 3830004   | PGAP2             | ENSG00000148985 | 79   | 0.17 | 0.12 | 0.43 | 0.048  | NA |
| chr11 | 13298796  | 13300735  | ARNTL             | ENSG00000133794 | 579  | 0.25 | 0.23 | 0.43 | 0.026  | NA |
| chr11 | 61106710  | 61106927  | DAK               | ENSG00000149476 | 228  | 0.93 | 0.96 | 0.43 | -0.031 | NA |
| chr11 | 129871690 | 129873423 | PRDM10            | ENSG00000170325 | 124  | 0.18 | 0.2  | 0.43 | -0.022 | NA |
| chr11 | 8892072   | 8892794   | ST5               | ENSG00000166444 | 31   | 0.24 | 0.19 | 0.44 | 0.048  | NA |
| chr11 | 18417667  | 18417925  | LDHA              | ENSG00000134333 | -17  | 0.33 | 0.26 | 0.44 | 0.076  | NA |
| chr11 | 62104779  | 62105636  | ASRGL1            | ENSG00000162174 | 287  | 0.23 | 0.2  | 0.44 | 0.027  | NA |
| chr11 | 118272261 | 118272546 | ATP5L             | ENSG00000167283 | 78   | 0.21 | 0.15 | 0.44 | 0.057  | NA |
| chr11 | 10324353  | 10324828  | RP11-351I24.1     | ENSG00000254554 | 661  | 0.23 | 0.13 | 0.45 | 0.096  | NA |
| chr11 | 61559907  | 61560549  | MIR611            | ENSG00000207601 | -195 | 0.26 | 0.19 | 0.45 | 0.071  | NA |
| chr11 | 76381449  | 76382295  | LRRC32            | ENSG00000137507 | -81  | 0.26 | 0.22 | 0.45 | 0.042  | NA |
| chr11 | 77122736  | 77123088  | PAK1              | ENSG00000149269 | 37   | 0.23 | 0.13 | 0.45 | 0.095  | NA |
| chr11 | 101785594 | 101786128 | KIAA1377          | ENSG00000110318 | 115  | 0.22 | 0.18 | 0.45 | 0.037  | NA |
| chr11 | 124615389 | 124617006 | RP11-677M14.2-001 | ENSG00000255045 | 36   | 0.24 | 0.27 | 0.45 | -0.039 | NA |
| chr11 | 49839280  | 49839568  | RP11-707M1.5      | ENSG00000254520 | 237  | 0.86 | 0.83 | 0.46 | 0.032  | NA |
| chr11 | 50257255  | 50257772  | RP11-347H15.4     | ENSG00000254518 | -237 | 0.63 | 0.59 | 0.46 | 0.041  | NA |
| chr11 | 60609392  | 60609786  | CCDC86            | ENSG00000110104 | 45   | 0.35 | 0.44 | 0.46 | -0.091 | NA |
| chr11 | 61196921  | 61197697  | CPSF7             | ENSG00000149532 | -304 | 0.24 | 0.28 | 0.46 | -0.038 | NA |

|       |           |           |                |                 |       |      |      |      |        |    |
|-------|-----------|-----------|----------------|-----------------|-------|------|------|------|--------|----|
| chr11 | 65101109  | 65101843  | DPF2           | ENSG00000133884 | 251   | 0.14 | 0.17 | 0.46 | -0.034 | NA |
| chr11 | 66114497  | 66115525  | B3GNT1         | ENSG00000174684 | 53    | 0.25 | 0.3  | 0.46 | -0.049 | NA |
| chr11 | 636906    | 640628    | DRD4           | ENSG00000069696 | 1474  | 0.28 | 0.26 | 0.47 | 0.022  | NA |
| chr11 | 63606114  | 63607474  | MARK2          | ENSG00000072518 | 394   | 0.25 | 0.23 | 0.47 | 0.023  | NA |
| chr11 | 64577277  | 64578349  | MEN1           | ENSG00000133895 | -209  | 0.23 | 0.2  | 0.47 | 0.031  | NA |
| chr11 | 69258149  | 69258544  | AP000439.2     | ENSG00000255606 | 1165  | 0.17 | 0.22 | 0.47 | -0.044 | NA |
| chr11 | 64972185  | 64972404  | CAPN1          | ENSG00000014216 | -1434 | 0.83 | 0.71 | 0.48 | 0.12   | NA |
| chr11 | 789871    | 790133    | CEND1          | ENSG00000184524 | 111   | 0.37 | 0.29 | 0.49 | 0.08   | NA |
| chr11 | 6292256   | 6292693   | CCKBR          | ENSG00000110148 | 468   | 0.93 | 0.96 | 0.49 | -0.027 | NA |
| chr11 | 74022428  | 74022703  | P4HA3          | ENSG00000149380 | 104   | 0.2  | 1    | 0.49 | -0.8   | NA |
| chr11 | 89955742  | 89956358  | CHORDC1        | ENSG00000110172 | 148   | 0.29 | 0.32 | 0.49 | -0.034 | NA |
| chr11 | 108368498 | 108369407 | KDEL2          | ENSG00000178202 | 207   | 0.27 | 0.32 | 0.49 | -0.05  | NA |
| chr11 | 118842379 | 118842933 | FOXR1          | ENSG00000176302 | 239   | 0.82 | 0.88 | 0.49 | -0.054 | NA |
| chr11 | 124745909 | 124746773 | ROBO3          | ENSG00000154134 | 324   | 0.23 | 0.19 | 0.49 | 0.043  | NA |
| chr11 | 62528903  | 62529428  | POLR2G         | ENSG00000168002 | 149   | 0.23 | 0.14 | 0.5  | 0.088  | NA |
| chr11 | 66112251  | 66112803  | BRMS1          | ENSG00000174744 | -244  | 0.26 | 0.31 | 0.5  | -0.053 | NA |
| chr11 | 66176034  | 66176649  | RP11-867G23.10 | ENSG00000254510 | -288  | 0.2  | 0.15 | 0.5  | 0.047  | NA |
| chr11 | 720561    | 721369    | EPS8L2         | ENSG00000177106 | 359   | 0.25 | 0.21 | 0.51 | 0.035  | NA |
| chr11 | 7041072   | 7041949   | ZNF214         | ENSG00000149050 | -44   | 0.29 | 0.22 | 0.51 | 0.071  | NA |
| chr11 | 65666676  | 65668209  | FOSL1          | ENSG00000175592 | 417   | 0.21 | 0.23 | 0.51 | -0.019 | NA |
| chr11 | 73471275  | 73472483  | RP11-707G14.1  | ENSG00000256034 | 271   | 0.19 | 0.21 | 0.51 | -0.023 | NA |
| chr11 | 95656912  | 95657365  | MTMR2          | ENSG00000087053 | -211  | 0.33 | 0.27 | 0.51 | 0.051  | NA |
| chr11 | 621963    | 622176    | CDHR5          | ENSG00000099834 | -932  | 0.88 | 0.92 | 0.52 | -0.045 | NA |
| chr11 | 9286273   | 9287091   | DENND5A        | ENSG00000184014 | -48   | 0.28 | 0.23 | 0.52 | 0.05   | NA |
| chr11 | 60691785  | 60692532  | TMEM132A       | ENSG00000006118 | 223   | 0.27 | 0.23 | 0.52 | 0.04   | NA |
| chr11 | 64490493  | 64491146  | NRXN2          | ENSG00000110076 | -159  | 0.57 | 0.7  | 0.52 | -0.13  | NA |
| chr11 | 120381877 | 120382935 | GRIK4          | ENSG00000149403 | -62   | 0.23 | 0.2  | 0.52 | 0.025  | NA |
| chr11 | 126081369 | 126082028 | RPUSD4         | ENSG00000165526 | -174  | 0.28 | 0.23 | 0.52 | 0.051  | NA |
| chr11 | 126873091 | 126873809 | AP002833.1     | ENSG00000256527 | 152   | 0.26 | 0.22 | 0.52 | 0.036  | NA |
| chr11 | 43380241  | 43381040  | TTC17          | ENSG00000052841 | 158   | 0.44 | 0.33 | 0.53 | 0.11   | NA |

|       |           |           |                |                 |       |      |      |      |        |    |
|-------|-----------|-----------|----------------|-----------------|-------|------|------|------|--------|----|
| chr11 | 67168616  | 67169098  | PPP1CA         | ENSG00000172531 | 191   | 0.22 | 0.18 | 0.53 | 0.041  | NA |
| chr11 | 430814    | 431775    | ANO9           | ENSG00000185101 | -1181 | 0.9  | 0.85 | 0.54 | 0.059  | NA |
| chr11 | 33060699  | 33061846  | TCP11L1        | ENSG00000176148 | 309   | 0.19 | 0.16 | 0.54 | 0.026  | NA |
| chr11 | 61684591  | 61685216  | RAB3IL1        | ENSG00000167994 | 94    | 0.19 | 0.22 | 0.54 | -0.023 | NA |
| chr11 | 64329520  | 64329825  | SLC22A11       | ENSG00000168065 | 118   | 0.5  | 1    | 0.54 | -0.5   | NA |
| chr11 | 64884115  | 64885448  | AP003068.12    | ENSG00000255173 | 152   | 0.2  | 0.18 | 0.54 | 0.022  | NA |
| chr11 | 73587673  | 73588102  | CHCHD8         | ENSG00000181924 | -168  | 0.29 | 0.38 | 0.54 | -0.086 | NA |
| chr11 | 32460586  | 32461004  | WT1-AS         | ENSG00000183242 | 879   | 0.28 | 0.16 | 0.55 | 0.12   | NA |
| chr11 | 49455935  | 49456211  | RP11-61N20.3   | ENSG00000226268 | -83   | 0.99 | 0.97 | 0.55 | 0.022  | NA |
| chr11 | 62439047  | 62439803  | C11orf48       | ENSG00000162194 | -339  | 0.28 | 0.24 | 0.55 | 0.039  | NA |
| chr11 | 65408344  | 65408631  | SIPA1          | ENSG00000213445 | 188   | 0.9  | 0.94 | 0.55 | -0.042 | NA |
| chr11 | 72353222  | 72354358  | PDE2A          | ENSG00000186642 | -335  | 0.26 | 0.23 | 0.55 | 0.034  | NA |
| chr11 | 87908243  | 87908614  | RAB38          | ENSG00000123892 | 173   | 0.21 | 0.17 | 0.55 | 0.041  | NA |
| chr11 | 111895576 | 111896447 | DLAT           | ENSG00000150768 | -121  | 0.2  | 0.25 | 0.55 | -0.047 | NA |
| chr11 | 46354091  | 46355190  | DGKZ           | ENSG00000149091 | 185   | 0.18 | 0.16 | 0.56 | 0.027  | NA |
| chr11 | 60775036  | 60776307  | CD6            | ENSG0000013725  | -152  | 0.49 | 0.52 | 0.56 | -0.03  | NA |
| chr11 | 72532612  | 72533774  | ATG16L2        | ENSG00000168010 | 260   | 0.24 | 0.22 | 0.56 | 0.025  | NA |
| chr11 | 86665901  | 86666567  | FZD4           | ENSG00000174804 | 199   | 0.23 | 0.2  | 0.56 | 0.023  | NA |
| chr11 | 119019643 | 119020887 | ABCG4          | ENSG00000172350 | 543   | 0.21 | 0.19 | 0.56 | 0.021  | NA |
| chr11 | 460468    | 460715    | PTDSS2         | ENSG00000174915 | 1917  | 0.94 | 0.97 | 0.57 | -0.027 | NA |
| chr11 | 47416357  | 47416598  | RP11-750H9.5   | ENSG00000255197 | 714   | 0.92 | 0.89 | 0.57 | 0.031  | NA |
| chr11 | 57194340  | 57194650  | SLC43A3        | ENSG00000134802 | -77   | 0.25 | 0.32 | 0.57 | -0.065 | NA |
| chr11 | 60681552  | 60682268  | TMEM109        | ENSG00000110108 | 233   | 0.25 | 0.31 | 0.57 | -0.055 | NA |
| chr11 | 66079092  | 66080920  | RP11-867G23.13 | ENSG00000254458 | -318  | 0.25 | 0.27 | 0.57 | -0.023 | NA |
| chr11 | 107992004 | 107992731 | ACAT1          | ENSG00000075239 | 124   | 0.17 | 0.2  | 0.57 | -0.03  | NA |
| chr11 | 2013333   | 2013617   | AC051649.6     | ENSG00000232987 | 1149  | 0.85 | 0.92 | 0.58 | -0.074 | NA |
| chr11 | 17409452  | 17409692  | KCNJ11         | ENSG00000187486 | 634   | 0.93 | 0.85 | 0.58 | 0.077  | NA |
| chr11 | 62420544  | 62420924  | INTS5          | ENSG00000185085 | 40    | 0.16 | 0.18 | 0.58 | -0.022 | NA |
| chr11 | 66494937  | 66496387  | SPTBN2         | ENSG00000173898 | 768   | 0.23 | 0.21 | 0.58 | 0.018  | NA |
| chr11 | 69451136  | 69458596  | CCND1          | ENSG00000110092 | -989  | 0.24 | 0.25 | 0.58 | -0.012 | NA |

|       |           |           |               |                 |      |      |      |      |        |    |
|-------|-----------|-----------|---------------|-----------------|------|------|------|------|--------|----|
| chr11 | 122526278 | 122527479 | UBASH3B       | ENSG00000154127 | 495  | 0.3  | 0.27 | 0.58 | 0.033  | NA |
| chr11 | 61734760  | 61735932  | FTH1          | ENSG00000167996 | -288 | 0.32 | 0.29 | 0.59 | 0.034  | NA |
| chr11 | 118401235 | 118402069 | RP11-770J1.3  | ENSG00000255435 | -368 | 0.21 | 0.18 | 0.59 | 0.028  | NA |
| chr11 | 375851    | 377380    | B4GALNT4      | ENSG00000182272 | 1154 | 0.96 | 0.95 | 0.6  | 0.0069 | NA |
| chr11 | 8985452   | 8986507   | TMEM9B        | ENSG00000175348 | -252 | 0.19 | 0.21 | 0.6  | -0.024 | NA |
| chr11 | 11642121  | 11643819  | GALNTL4       | ENSG00000110328 | 335  | 0.22 | 0.2  | 0.6  | 0.016  | NA |
| chr11 | 44971048  | 44972685  | TP53I11       | ENSG00000175274 | -155 | 0.23 | 0.21 | 0.6  | 0.019  | NA |
| chr11 | 73693702  | 73694802  | UCP2          | ENSG00000175567 | -377 | 0.24 | 0.21 | 0.6  | 0.031  | NA |
| chr11 | 76777569  | 76778453  | CAPN5         | ENSG00000149260 | 32   | 0.25 | 0.23 | 0.6  | 0.022  | NA |
| chr11 | 45825615  | 45826872  | SLC35C1       | ENSG00000181830 | 620  | 0.27 | 0.24 | 0.61 | 0.025  | NA |
| chr11 | 47663577  | 47664331  | MTCH2         | ENSG00000109919 | 50   | 0.18 | 0.15 | 0.61 | 0.031  | NA |
| chr11 | 57091614  | 57092831  | TNKS1BP1      | ENSG00000149115 | 179  | 0.25 | 0.23 | 0.61 | 0.021  | NA |
| chr11 | 63932990  | 63934070  | MACROD1       | ENSG00000133315 | -283 | 0.19 | 0.18 | 0.61 | 0.017  | NA |
| chr11 | 67120856  | 67121228  | POLD4         | ENSG00000175482 | -81  | 0.25 | 0.18 | 0.61 | 0.07   | NA |
| chr11 | 75917271  | 75917926  | WNT11         | ENSG00000085741 | -22  | 0.2  | 0.22 | 0.61 | -0.018 | NA |
| chr11 | 118972181 | 118972409 | DPAGT1        | ENSG00000172269 | 247  | 0.16 | 0.22 | 0.61 | -0.058 | NA |
| chr11 | 11863272  | 11864018  | USP47         | ENSG00000170242 | 158  | 0.27 | 0.23 | 0.62 | 0.035  | NA |
| chr11 | 18720271  | 18720821  | TMEM86A       | ENSG00000151117 | 220  | 0.22 | 0.19 | 0.62 | 0.033  | NA |
| chr11 | 19733936  | 19735320  | NAV2          | ENSG00000166833 | -253 | 0.21 | 0.23 | 0.62 | -0.022 | NA |
| chr11 | 22850765  | 22851367  | SVIP          | ENSG00000198168 | -147 | 0.22 | 0.2  | 0.62 | 0.024  | NA |
| chr11 | 61355038  | 61355363  | RP11-855O10.2 | ENSG00000250230 | -766 | 0.31 | 0.22 | 0.62 | 0.094  | NA |
| chr11 | 65430142  | 65431079  | RELA          | ENSG00000173039 | -359 | 0.24 | 0.22 | 0.62 | 0.021  | NA |
| chr11 | 73881899  | 73882572  | C2CD3         | ENSG00000168014 | -322 | 0.35 | 0.32 | 0.62 | 0.029  | NA |
| chr11 | 85955385  | 85955590  | EED           | ENSG00000074266 | -99  | 0.19 | 0.33 | 0.62 | -0.14  | NA |
| chr11 | 94501366  | 94502696  | AMOTL1        | ENSG00000166025 | 523  | 0.21 | 0.23 | 0.62 | -0.021 | NA |
| chr11 | 116658411 | 116658895 | ZNF259        | ENSG00000109917 | -39  | 0.17 | 0.2  | 0.62 | -0.027 | NA |
| chr11 | 910677    | 911581    | CHID1         | ENSG00000177830 | -338 | 0.21 | 0.19 | 0.63 | 0.023  | NA |
| chr11 | 6494725   | 6495453   | TRIM3         | ENSG00000110171 | -103 | 0.25 | 0.35 | 0.63 | -0.1   | NA |
| chr11 | 61519741  | 61519972  | C11orf9       | ENSG00000124920 | -258 | 0.27 | 0.2  | 0.63 | 0.065  | NA |
| chr11 | 64216411  | 64216709  | AP003774.4    | ENSG00000181908 | 14   | 0.2  | 0.26 | 0.63 | -0.053 | NA |



|       |           |           |               |                  |      |      |      |      |        |    |
|-------|-----------|-----------|---------------|------------------|------|------|------|------|--------|----|
| chr11 | 64863698  | 64863980  | C11orf2       | ENSG00000149823  | 140  | 0.29 | 0.22 | 0.63 | 0.067  | NA |
| chr11 | 68080365  | 68080931  | LRP5          | ENSG00000162337  | 496  | 0.16 | 0.18 | 0.63 | -0.022 | NA |
| chr11 | 120081487 | 120082345 | OAF           | ENSG00000184232  | -93  | 0.18 | 0.2  | 0.63 | -0.013 | NA |
| chr11 | 67176945  | 67177169  | TBC1D10C      | ENSG00000175463  | 719  | 0.59 | 0.64 | 0.64 | -0.049 | NA |
| chr11 | 93474085  | 93475075  | TAF1D         | ENSG00000166012  | 62   | 0.22 | 0.2  | 0.64 | 0.022  | NA |
| chr11 | 130029658 | 130030262 | ST14          | ENSG00000149418  | 237  | 0.2  | 0.18 | 0.64 | 0.023  | NA |
| chr11 | 6477603   | 6478178   | TRIM3         | ENSG00000110171  | -49  | 0.96 | 0.94 | 0.65 | 0.018  | NA |
| chr11 | 62521370  | 62521962  | ZBTB3         | ENSG00000185670  | -35  | 0.33 | 0.28 | 0.65 | 0.05   | NA |
| chr11 | 65321225  | 65321823  | LTBP3         | ENSG00000168056  | -190 | 0.91 | 0.89 | 0.65 | 0.019  | NA |
| chr11 | 68039300  | 68039880  | C11orf24      | ENSG00000171067  | -206 | 0.26 | 0.28 | 0.65 | -0.025 | NA |
| chr11 | 68227860  | 68228608  | PPP6R3        | ENSG00000110075  | 48   | 0.28 | 0.24 | 0.65 | 0.04   | NA |
| chr11 | 26353537  | 26353812  | ANO3          | ENSG00000134343  | 6    | 0.18 | 0.21 | 0.66 | -0.031 | NA |
| chr11 | 64009698  | 64009999  | FKBP2         | ENSG00000173486  | 628  | 0.33 | 0.12 | 0.66 | 0.21   | NA |
| chr11 | 64739010  | 64739750  | C11orf85      | ENSG00000168070  | -22  | 0.42 | 0.39 | 0.66 | 0.031  | NA |
| chr11 | 45943513  | 45944852  | GYLTL1B       | ENSG00000165905  | -61  | 0.21 | 0.19 | 0.67 | 0.014  | NA |
| chr11 | 134201784 | 134202407 | GLB1L2        | ENSG00000149328  | 233  | 0.23 | 0.21 | 0.67 | 0.019  | NA |
| chr11 | 47270234  | 47270633  | ACP2          | ENSG00000134575  | -80  | 0.25 | 0.21 | 0.68 | 0.037  | NA |
| chr11 | 61061751  | 61063063  | VWCE          | ENSG00000167992  | 91   | 0.34 | 0.33 | 0.68 | 0.018  | NA |
| chr11 | 62559099  | 62559555  | TMEM223       | ENSG00000168569  | -112 | 0.23 | 0.18 | 0.68 | 0.047  | NA |
| chr11 | 102188179 | 102188440 | BIRC3         | ENSG00000023445  | 94   | 0.27 | 0.16 | 0.68 | 0.11   | NA |
| chr11 | 31820060  | 31821416  | PAX6          | ENSG00000007372  | 1456 | 0.41 | 0.37 | 0.69 | 0.04   | NA |
| chr11 | 123611898 | 123612545 | ZNF202        | ENSG00000166261  | 101  | 0.21 | 0.24 | 0.69 | -0.037 | NA |
| chr11 | 57479486  | 57480308  | MED19         | ENSG00000156603  | -224 | 0.15 | 0.29 | 0.7  | -0.14  | NA |
| chr11 | 64794832  | 64795362  | SNX15         | ENSG00000110025  | 217  | 0.2  | 0.16 | 0.7  | 0.038  | NA |
| chr11 | 67033675  | 67034660  | ADRBK1        | ENSG00000173020  | 286  | 0.22 | 0.21 | 0.7  | 0.017  | NA |
| chr11 | 68451359  | 68452846  | GAL           | ENSG00000069482  | 159  | 0.32 | 0.3  | 0.7  | 0.018  | NA |
| chr11 | 108463598 | 108464103 | EXPH5         | ENSG00000110723  | 524  | 0.29 | 0.14 | 0.7  | 0.15   | NA |
| chr11 | 123301049 | 123302149 | AP000783.1    | ENSG000000254667 | 541  | 0.23 | 0.21 | 0.7  | 0.018  | NA |
| chr11 | 125034243 | 125034495 | RP11-687M24.5 | ENSG000000254880 | 136  | 0.26 | 0.36 | 0.7  | -0.093 | NA |
| chr11 | 31391087  | 31391498  | DCDC1         | ENSG00000188682  | 29   | 0.18 | 0.22 | 0.71 | -0.04  | NA |

|       |           |           |               |                 |       |      |      |      |        |    |
|-------|-----------|-----------|---------------|-----------------|-------|------|------|------|--------|----|
| chr11 | 34937328  | 34938380  | PDHX          | ENSG00000110435 | 478   | 0.24 | 0.27 | 0.71 | -0.03  | NA |
| chr11 | 44117117  | 44117994  | EXT2          | ENSG00000151348 | 332   | 0.24 | 0.26 | 0.71 | -0.024 | NA |
| chr11 | 58345673  | 58347321  | LPXN          | ENSG00000110031 | -804  | 0.25 | 0.23 | 0.71 | 0.018  | NA |
| chr11 | 60673597  | 60674184  | PRPF19        | ENSG00000110107 | 123   | 0.28 | 0.31 | 0.71 | -0.027 | NA |
| chr11 | 95522460  | 95524043  | FAM76B        | ENSG00000077458 | -526  | 0.24 | 0.22 | 0.71 | 0.02   | NA |
| chr11 | 120195805 | 120196372 | TMEM136       | ENSG00000181264 | 250   | 0.29 | 0.23 | 0.71 | 0.066  | NA |
| chr11 | 46316875  | 46317485  | CREB3L1       | ENSG00000157613 | 503   | 0.24 | 0.26 | 0.72 | -0.026 | NA |
| chr11 | 804827    | 805608    | LRDD          | ENSG00000177595 | -114  | 0.18 | 0.2  | 0.73 | -0.015 | NA |
| chr11 | 8102358   | 8102913   | TUB           | ENSG00000166402 | -274  | 0.24 | 0.21 | 0.73 | 0.03   | NA |
| chr11 | 34126828  | 34127573  | NAT10         | ENSG00000135372 | 51    | 0.24 | 0.21 | 0.73 | 0.033  | NA |
| chr11 | 66405742  | 66406691  | RBM4          | ENSG00000173933 | 128   | 0.27 | 0.31 | 0.73 | -0.033 | NA |
| chr11 | 113660755 | 113661046 | RP11-667M19.6 | ENSG00000256167 | -140  | 0.9  | 1    | 0.73 | -0.095 | NA |
| chr11 | 119210290 | 119211658 | C1QTNF5       | ENSG00000223953 | 534   | 0.21 | 0.2  | 0.73 | 0.014  | NA |
| chr11 | 124981319 | 124981769 | TMEM218       | ENSG00000150433 | -69   | 0.33 | 1    | 0.73 | -0.67  | NA |
| chr11 | 3078142   | 3078984   | CARS          | ENSG00000110619 | 47    | 0.26 | 0.23 | 0.74 | 0.026  | NA |
| chr11 | 3818447   | 3819307   | NUP98         | ENSG00000110713 | -189  | 0.18 | 0.22 | 0.74 | -0.04  | NA |
| chr11 | 6947520   | 6948212   | ZNF215        | ENSG00000149054 | 231   | 0.27 | 0.33 | 0.74 | -0.06  | NA |
| chr11 | 30040072  | 30040294  | KCNA4         | ENSG00000182255 | -1613 | 0.92 | 1    | 0.74 | -0.083 | NA |
| chr11 | 33037206  | 33037917  | DEPDC7        | ENSG00000121690 | 151   | 0.21 | 0.19 | 0.74 | 0.017  | NA |
| chr11 | 33722142  | 33722599  | C11orf91      | ENSG00000205177 | -84   | 0.2  | 0.23 | 0.74 | -0.025 | NA |
| chr11 | 43600712  | 43601409  | HSD17B12      | ENSG00000149084 | 15    | 0.39 | 0.34 | 0.74 | 0.041  | NA |
| chr11 | 65292571  | 65292940  | SCYL1         | ENSG00000142186 | 172   | 0.18 | 0.2  | 0.74 | -0.021 | NA |
| chr11 | 130416800 | 130417098 | BAK1P2        | ENSG00000236616 | 375   | 0.96 | 0.99 | 0.74 | -0.023 | NA |
| chr11 | 130786111 | 130786634 | SNX19         | ENSG00000120451 | -33   | 0.17 | 0.19 | 0.74 | -0.018 | NA |
| chr11 | 3612650   | 3612885   | AP006294.2    | ENSG00000230851 | 78    | 0.97 | 0.94 | 0.75 | 0.032  | NA |
| chr11 | 6281076   | 6281307   | CCKBR         | ENSG00000110148 | 86    | 0.18 | 0.15 | 0.75 | 0.033  | NA |
| chr11 | 8703783   | 8704616   | RPL27A        | ENSG00000166441 | 241   | 0.33 | 0.29 | 0.75 | 0.037  | NA |
| chr11 | 62606541  | 62607120  | WDR74         | ENSG00000133316 | 186   | 0.18 | 0.15 | 0.75 | 0.027  | NA |
| chr11 | 66458783  | 66459123  | SPTBN2        | ENSG00000173898 | -1124 | 0.9  | 1    | 0.75 | -0.1   | NA |
| chr11 | 68816341  | 68816951  | TPCN2         | ENSG00000162341 | 296   | 0.2  | 0.18 | 0.75 | 0.025  | NA |

|       |           |           |              |                 |      |      |      |      |        |    |
|-------|-----------|-----------|--------------|-----------------|------|------|------|------|--------|----|
| chr11 | 106888323 | 106890203 | GUCY1A2      | ENSG00000152402 | -386 | 0.21 | 0.23 | 0.75 | -0.021 | NA |
| chr11 | 1592498   | 1592810   | RP13-25N22.1 | ENSG00000233930 | 71   | 0.23 | 0.27 | 0.76 | -0.036 | NA |
| chr11 | 2907308   | 2907675   | CDKN1C       | ENSG00000129757 | -380 | 0.18 | 0.21 | 0.76 | -0.03  | NA |
| chr11 | 9112461   | 9113459   | SCUBE2       | ENSG00000175356 | 133  | 0.27 | 0.29 | 0.76 | -0.019 | NA |
| chr11 | 22214172  | 22215320  | ANO5         | ENSG00000171714 | 24   | 0.26 | 0.28 | 0.76 | -0.019 | NA |
| chr11 | 66024910  | 66026253  | KLC2         | ENSG00000174996 | 490  | 0.21 | 0.2  | 0.76 | 0.014  | NA |
| chr11 | 69632033  | 69634710  | FGF3         | ENSG00000186895 | 421  | 0.31 | 0.3  | 0.76 | 0.0096 | NA |
| chr11 | 12398965  | 12399863  | PARVA        | ENSG00000197702 | 304  | 0.24 | 0.26 | 0.77 | -0.024 | NA |
| chr11 | 57434542  | 57434788  | ZDHHC5       | ENSG00000156599 | -554 | 0.24 | 0.2  | 0.77 | 0.041  | NA |
| chr11 | 67055931  | 67057249  | ANKRD13D     | ENSG00000172932 | 572  | 0.19 | 0.2  | 0.77 | -0.011 | NA |
| chr11 | 75110493  | 75110924  | RPS3         | ENSG00000149273 | 178  | 0.2  | 0.24 | 0.77 | -0.042 | NA |
| chr11 | 105892725 | 105892952 | KIAA1826     | ENSG00000170903 | 116  | 0.24 | 0.2  | 0.77 | 0.033  | NA |
| chr11 | 800551    | 800866    | LRDD         | ENSG00000177595 | 1378 | 0.98 | 0.95 | 0.78 | 0.022  | NA |
| chr11 | 1903078   | 1903334   | LSP1         | ENSG00000130592 | 1299 | 0.73 | 0.77 | 0.78 | -0.043 | NA |
| chr11 | 46406904  | 46407441  | CHRM4        | ENSG00000180720 | 935  | 0.98 | 0.96 | 0.78 | 0.015  | NA |
| chr11 | 65325081  | 65326209  | LTBP3        | ENSG00000168056 | -409 | 0.22 | 0.2  | 0.78 | 0.013  | NA |
| chr11 | 67052394  | 67053110  | ADRBK1       | ENSG00000173020 | 1010 | 0.91 | 0.92 | 0.78 | -0.018 | NA |
| chr11 | 47615710  | 47616055  | C1QTNF4      | ENSG00000172247 | 329  | 0.19 | 0.14 | 0.79 | 0.05   | NA |
| chr11 | 93517309  | 93518130  | MED17        | ENSG00000042429 | 326  | 0.22 | 0.24 | 0.79 | -0.019 | NA |
| chr11 | 118016237 | 118016984 | SCN4B        | ENSG00000177098 | -195 | 0.2  | 0.18 | 0.79 | 0.016  | NA |
| chr11 | 126870226 | 126870552 | KIRREL3      | ENSG00000149571 | 27   | 0.2  | 0.22 | 0.79 | -0.023 | NA |
| chr11 | 13984066  | 13986349  | SPON1        | ENSG00000152268 | 1023 | 0.25 | 0.26 | 0.8  | -0.011 | NA |
| chr11 | 18548060  | 18548629  | TSG101       | ENSG00000074319 | 24   | 0.19 | 0.21 | 0.8  | -0.024 | NA |
| chr11 | 46867194  | 46868077  | CKAP5        | ENSG00000175216 | 145  | 0.28 | 0.26 | 0.8  | 0.016  | NA |
| chr11 | 64018435  | 64019377  | PLCB3        | ENSG00000149782 | -89  | 0.2  | 0.21 | 0.8  | -0.014 | NA |
| chr11 | 64480199  | 64481344  | NRXN2        | ENSG00000110076 | -554 | 0.47 | 0.49 | 0.81 | -0.011 | NA |
| chr11 | 66610366  | 66611267  | RCE1         | ENSG00000173653 | -67  | 0.26 | 0.27 | 0.81 | -0.016 | NA |
| chr11 | 71952112  | 71952528  | PHOX2A       | ENSG00000165462 | -84  | 0.27 | 0.25 | 0.81 | 0.018  | NA |
| chr11 | 85521991  | 85522285  | SYTL2        | ENSG00000137501 | 34   | 0.16 | 0.14 | 0.81 | 0.02   | NA |
| chr11 | 119293320 | 119293943 | THY1         | ENSG00000154096 | 251  | 0.18 | 0.16 | 0.81 | 0.02   | NA |

|       |           |           |               |                 |       |      |      |      |         |    |
|-------|-----------|-----------|---------------|-----------------|-------|------|------|------|---------|----|
| chr11 | 129938936 | 129940798 | APLP2         | ENSG00000084234 | 135   | 0.22 | 0.21 | 0.81 | 0.0083  | NA |
| chr11 | 57508730  | 57509569  | C11orf31      | ENSG00000211450 | 324   | 0.24 | 0.23 | 0.82 | 0.018   | NA |
| chr11 | 63438301  | 63439314  | ATL3          | ENSG00000184743 | 277   | 0.28 | 0.29 | 0.82 | -0.014  | NA |
| chr11 | 64052607  | 64053652  | GPR137        | ENSG00000173264 | 403   | 0.2  | 0.19 | 0.82 | 0.01    | NA |
| chr11 | 64645429  | 64646566  | EHD1          | ENSG00000110047 | 16    | 0.2  | 0.21 | 0.82 | -0.011  | NA |
| chr11 | 65789909  | 65790168  | CATSPER1      | ENSG00000175294 | -1353 | 0.24 | 0.19 | 0.82 | 0.041   | NA |
| chr11 | 71823668  | 71823975  | C11orf51      | ENSG00000110200 | -89   | 0.21 | 0.19 | 0.82 | 0.021   | NA |
| chr11 | 121322538 | 121323302 | SORL1         | ENSG00000137642 | 8     | 0.18 | 0.17 | 0.82 | 0.011   | NA |
| chr11 | 134145559 | 134147180 | GLB1L3        | ENSG00000166105 | -266  | 0.31 | 0.29 | 0.82 | 0.016   | NA |
| chr11 | 20181200  | 20182325  | DBX1          | ENSG00000109851 | 108   | 0.31 | 0.3  | 0.83 | 0.013   | NA |
| chr11 | 30344536  | 30344946  | C11orf46      | ENSG00000152219 | 143   | 0.2  | 0.18 | 0.83 | 0.025   | NA |
| chr11 | 32459422  | 32459878  | WT1-AS        | ENSG00000183242 | 175   | 0.5  | 0.25 | 0.83 | 0.25    | NA |
| chr11 | 123172454 | 123173104 | U8            | ENSG00000200496 | 681   | 0.21 | 0.22 | 0.83 | -0.015  | NA |
| chr11 | 23751953  | 23752361  | RP11-945A11.1 | ENSG00000255193 | 23    | 0.98 | 0.97 | 0.84 | 0.0084  | NA |
| chr11 | 27384359  | 27384870  | CCDC34        | ENSG00000109881 | 167   | 0.33 | 0.1  | 0.84 | 0.23    | NA |
| chr11 | 58672851  | 58673288  | GLYATL1       | ENSG00000166840 | 198   | 0.5  | 0.25 | 0.84 | 0.25    | NA |
| chr11 | 63753414  | 63754454  | OTUB1         | ENSG00000167770 | 465   | 0.31 | 0.29 | 0.84 | 0.017   | NA |
| chr11 | 66314207  | 66314455  | ACTN3         | ENSG00000248746 | 19    | 0.4  | 0.42 | 0.84 | -0.019  | NA |
| chr11 | 118938193 | 118938815 | VPS11         | ENSG00000160695 | 101   | 0.19 | 0.18 | 0.84 | 0.016   | NA |
| chr11 | 1034834   | 1035146   | MUC6          | ENSG00000184956 | 1716  | 0.23 | 0.3  | 0.85 | -0.071  | NA |
| chr11 | 1247830   | 1248140   | MUC5B         | ENSG00000117983 | -1765 | 0.93 | 0.96 | 0.85 | -0.029  | NA |
| chr11 | 92648683  | 92649103  | EEF1A1P18     | ENSG00000255127 | 1125  | 0.97 | 0.98 | 0.85 | -0.0073 | NA |
| chr11 | 1774588   | 1775040   | CTSD          | ENSG00000117984 | 1362  | 0.85 | 1    | 0.86 | -0.15   | NA |
| chr11 | 36531167  | 36531915  | TRAF6         | ENSG00000175104 | 265   | 0.18 | 0.14 | 0.86 | 0.037   | NA |
| chr11 | 47291200  | 47291858  | MADD          | ENSG00000110514 | 306   | 0.18 | 0.16 | 0.86 | 0.022   | NA |
| chr11 | 47736739  | 47737106  | AGBL2         | ENSG00000165923 | -18   | 0.16 | 0.17 | 0.86 | -0.013  | NA |
| chr11 | 49123969  | 49124178  | RP11-107P7.6  | ENSG00000254412 | -1353 | 0.83 | 0.92 | 0.86 | -0.083  | NA |
| chr11 | 63448704  | 63449386  | RTN3          | ENSG00000133318 | 127   | 0.27 | 0.29 | 0.86 | -0.025  | NA |
| chr11 | 105948097 | 105948830 | KBTD3         | ENSG00000182359 | -277  | 0.2  | 0.22 | 0.86 | -0.022  | NA |
| chr11 | 64851302  | 64851828  | CDCA5         | ENSG00000146670 | -197  | 0.24 | 0.26 | 0.87 | -0.017  | NA |

|       |           |           |               |                 |       |      |      |      |         |    |
|-------|-----------|-----------|---------------|-----------------|-------|------|------|------|---------|----|
| chr11 | 117103725 | 117103941 | RNF214        | ENSG00000167257 | 381   | 0.23 | 0.2  | 0.87 | 0.027   | NA |
| chr11 | 117747102 | 117747717 | FXVD6         | ENSG00000137726 | -51   | 0.25 | 0.28 | 0.87 | -0.033  | NA |
| chr11 | 235918    | 237290    | SIRT3         | ENSG00000142082 | -278  | 0.22 | 0.22 | 0.88 | 0.0057  | NA |
| chr11 | 925183    | 926083    | AP2A2         | ENSG00000183020 | -237  | 0.2  | 0.19 | 0.88 | 0.0093  | NA |
| chr11 | 10326048  | 10326590  | ADM           | ENSG00000148926 | 92    | 0.24 | 0.22 | 0.88 | 0.018   | NA |
| chr11 | 47869793  | 47870356  | NUP160        | ENSG0000030066  | -209  | 0.36 | 0.34 | 0.88 | 0.028   | NA |
| chr11 | 64036875  | 64037974  | GPR137        | ENSG00000173264 | -110  | 0.23 | 0.22 | 0.88 | 0.0091  | NA |
| chr11 | 64084646  | 64086057  | TRMT112       | ENSG00000173113 | -538  | 0.32 | 0.33 | 0.88 | -0.016  | NA |
| chr11 | 109963240 | 109964677 | ZC3H12C       | ENSG00000149289 | -129  | 0.25 | 0.24 | 0.88 | 0.0085  | NA |
| chr11 | 124543384 | 124544046 | SPA17         | ENSG00000064199 | 21    | 0.21 | 0.2  | 0.88 | 0.011   | NA |
| chr11 | 489247    | 490115    | PTDSS2        | ENSG00000174915 | 331   | 0.94 | 0.93 | 0.89 | 0.0067  | NA |
| chr11 | 47573911  | 47574899  | CELF1         | ENSG00000149187 | 264   | 0.18 | 0.17 | 0.89 | 0.0092  | NA |
| chr11 | 75062224  | 75062977  | ARRB1         | ENSG00000137486 | 104   | 0.27 | 0.25 | 0.89 | 0.02    | NA |
| chr11 | 72408050  | 72408513  | ARAP1         | ENSG00000186635 | -215  | 0.84 | 0.88 | 0.9  | -0.035  | NA |
| chr11 | 75294067  | 75294815  | CTD-2530H12.4 | ENSG00000255326 | 200   | 0.25 | 0.27 | 0.9  | -0.013  | NA |
| chr11 | 100998030 | 100999774 | PGR           | ENSG00000082175 | 899   | 0.21 | 0.22 | 0.9  | -0.0058 | NA |
| chr11 | 107328441 | 107328691 | CWF19L2       | ENSG00000152404 | 4     | 0.37 | 0.33 | 0.9  | 0.036   | NA |
| chr11 | 107879500 | 107880398 | CUL5          | ENSG00000166266 | 303   | 0.23 | 0.24 | 0.9  | -0.0097 | NA |
| chr11 | 45168618  | 45169101  | PRDM11        | ENSG00000019485 | -35   | 0.23 | 0.21 | 0.91 | 0.014   | NA |
| chr11 | 46389074  | 46389378  | DGKZ          | ENSG00000149091 | 24    | 0.63 | 0.59 | 0.91 | 0.042   | NA |
| chr11 | 67350928  | 67351953  | GSTP1         | ENSG00000084207 | 374   | 0.25 | 0.25 | 0.91 | 0.0076  | NA |
| chr11 | 43602545  | 43603215  | MIR129-2      | ENSG00000199077 | -64   | 0.23 | 0.21 | 0.92 | 0.017   | NA |
| chr11 | 60701682  | 60702219  | TMEM132A      | ENSG00000006118 | 140   | 0.94 | 0.93 | 0.92 | 0.011   | NA |
| chr11 | 66313169  | 66313822  | ZDHHC24       | ENSG00000174165 | -18   | 0.15 | 0.16 | 0.92 | -0.0086 | NA |
| chr11 | 17297779  | 17298694  | NUCB2         | ENSG00000070081 | -42   | 0.22 | 0.23 | 0.93 | -0.0098 | NA |
| chr11 | 46387905  | 46388535  | DGKZ          | ENSG00000149091 | -645  | 0.94 | 0.95 | 0.93 | -0.011  | NA |
| chr11 | 59436201  | 59437232  | PATL1         | ENSG00000166889 | -263  | 0.28 | 0.27 | 0.93 | 0.0073  | NA |
| chr11 | 61658569  | 61659592  | FADS3         | ENSG00000221968 | -227  | 0.23 | 0.24 | 0.93 | -0.008  | NA |
| chr11 | 10327013  | 10329831  | AMPD3         | ENSG00000133805 | -1438 | 0.23 | 0.23 | 0.94 | 0.0051  | NA |
| chr11 | 33795392  | 33796319  | FBXO3         | ENSG00000110429 | 5     | 0.3  | 0.29 | 0.94 | 0.012   | NA |

|       |           |           |               |                 |       |      |      |      |         |    |
|-------|-----------|-----------|---------------|-----------------|-------|------|------|------|---------|----|
| chr11 | 71524539  | 71524853  | CTD-2313N18.5 | ENSG00000248671 | 195   | 0.2  | 0.22 | 0.94 | -0.019  | NA |
| chr11 | 72525005  | 72526098  | ATG16L2       | ENSG00000168010 | 198   | 0.21 | 0.21 | 0.94 | -0.0058 | NA |
| chr11 | 16626053  | 16629180  | SOX6          | ENSG00000110693 | -78   | 0.25 | 0.25 | 0.95 | 0.0029  | NA |
| chr11 | 64692060  | 64692496  | PPP2R5B       | ENSG00000068971 | 135   | 0.17 | 0.16 | 0.95 | 0.0053  | NA |
| chr11 | 64889136  | 64889931  | FAU           | ENSG00000149806 | -240  | 0.2  | 0.18 | 0.95 | 0.019   | NA |
| chr11 | 128760441 | 128761233 | KCNJ5         | ENSG00000120457 | -414  | 0.17 | 0.18 | 0.95 | -0.0076 | NA |
| chr11 | 416419    | 417650    | SIGIRR        | ENSG00000185187 | 291   | 0.28 | 0.27 | 0.96 | 0.01    | NA |
| chr11 | 617226    | 617797    | IRF7          | ENSG00000185507 | -1512 | 0.97 | 0.98 | 0.96 | -0.0082 | NA |
| chr11 | 60282783  | 60283045  | MS4A13        | ENSG00000204979 | 28    | 0.98 | 0.96 | 0.96 | 0.017   | NA |
| chr11 | 65264957  | 65265398  | MALAT1        | ENSG00000251562 | -56   | 0.33 | 0.31 | 0.96 | 0.019   | NA |
| chr11 | 66045211  | 66045708  | CNIH2         | ENSG00000174871 | -202  | 0.23 | 0.21 | 0.96 | 0.015   | NA |
| chr11 | 66444997  | 66445471  | RBM4B         | ENSG00000173914 | -15   | 0.21 | 0.2  | 0.96 | 0.0098  | NA |
| chr11 | 82612259  | 82612844  | PRCP          | ENSG00000137509 | 24    | 0.29 | 0.31 | 0.96 | -0.016  | NA |
| chr11 | 82867960  | 82868560  | PCF11         | ENSG00000165494 | 230   | 0.3  | 0.28 | 0.96 | 0.019   | NA |
| chr11 | 113929633 | 113932190 | ZBTB16        | ENSG00000109906 | 596   | 0.24 | 0.24 | 0.96 | 0.0026  | NA |
| chr11 | 122932173 | 122933803 | HSPA8         | ENSG00000109971 | -797  | 0.2  | 0.19 | 0.96 | 0.0055  | NA |
| chr11 | 129306659 | 129306882 | BARX2         | ENSG00000043039 | 701   | 0.95 | 0.9  | 0.96 | 0.052   | NA |
| chr11 | 3186131   | 3186768   | OSBPL5        | ENSG00000021762 | 54    | 0.21 | 0.2  | 0.97 | 0.0079  | NA |
| chr11 | 45921387  | 45922167  | MAPK8IP1      | ENSG00000121653 | 68    | 0.25 | 0.24 | 0.97 | 0.01    | NA |
| chr11 | 65601069  | 65601551  | SNX32         | ENSG00000172803 | 198   | 0.18 | 0.18 | 0.97 | -0.0044 | NA |
| chr11 | 67806251  | 67806611  | TCIRG1        | ENSG00000110719 | -52   | 0.18 | 0.19 | 0.98 | -0.0088 | NA |
| chr11 | 76890783  | 76890986  | MYO7A         | ENSG00000137474 | 13    | 0.98 | 0.96 | 0.98 | 0.018   | NA |
| chr11 | 134582296 | 134582581 | RP11-469N6.2  | ENSG00000255344 | -1998 | 0.94 | 1    | 0.98 | -0.059  | NA |
| chr11 | 809202    | 810509    | LRDD          | ENSG00000177595 | -356  | 0.21 | 0.21 | 0.99 | 0.0071  | NA |
| chr11 | 9685520   | 9686050   | SWAP70        | ENSG00000133789 | 161   | 0.22 | 0.24 | 0.99 | -0.015  | NA |
| chr11 | 47399788  | 47400006  | SPI1          | ENSG00000066336 | 45    | 0.81 | 0.84 | 0.99 | -0.027  | NA |
| chr11 | 47429733  | 47430346  | SLC39A13      | ENSG00000165915 | -96   | 0.19 | 0.18 | 0.99 | 0.0051  | NA |
| chr11 | 86085693  | 86086006  | CCDC81        | ENSG00000149201 | 71    | 0.27 | 0.27 | 0.99 | 0.0069  | NA |
| chr11 | 133994709 | 133995090 | PTP4A2P2      | ENSG00000254481 | -675  | 0.33 | 0.36 | 0.99 | -0.025  | NA |
| chr11 | 459088    | 459345    | PTDSS2        | ENSG00000174915 | 542   | 1    | 0.8  | 1    | 0.2     | NA |

|       |          |          |               |                 |      |      |      |   |         |    |
|-------|----------|----------|---------------|-----------------|------|------|------|---|---------|----|
| chr11 | 1312846  | 1313129  | TOLLIP        | ENSG00000078902 | 413  | 1    | 1    | 1 | 0       | NA |
| chr11 | 2187488  | 2188245  | TH            | ENSG00000180176 | 138  | 0.25 | 0.26 | 1 | -0.009  | NA |
| chr11 | 2417650  | 2417993  | CD81          | ENSG00000110651 | 278  | 0.91 | 0.92 | 1 | -0.0089 | NA |
| chr11 | 2942794  | 2943066  | SLC22A18      | ENSG00000110628 | -268 | 1    | 0.89 | 1 | 0.11    | NA |
| chr11 | 3141642  | 3141877  | OSBPL5        | ENSG00000021762 | -542 | 0.97 | 0.97 | 1 | 0.0029  | NA |
| chr11 | 3181574  | 3182120  | OSBPL5        | ENSG00000021762 | 776  | 1    | 1    | 1 | 0       | NA |
| chr11 | 3254239  | 3254476  | MRGPRE        | ENSG00000184350 | -741 | 0.97 | 1    | 1 | -0.026  | NA |
| chr11 | 6291338  | 6291558  | CCKBR         | ENSG00000110148 | -558 | 1    | 1    | 1 | 0       | NA |
| chr11 | 6632879  | 6633787  | TAF10         | ENSG00000166337 | -154 | 0.23 | 0.23 | 1 | 0.0046  | NA |
| chr11 | 8009047  | 8009251  | EIF3F         | ENSG00000175390 | 246  | 0.11 | 0.05 | 1 | 0.058   | NA |
| chr11 | 8284102  | 8285032  | LMO1          | ENSG00000166407 | 368  | 0.22 | 0.2  | 1 | 0.023   | NA |
| chr11 | 10316232 | 10316469 | SBF2          | ENSG00000133812 | -596 | 0.31 | 0.35 | 1 | -0.046  | NA |
| chr11 | 17374928 | 17375422 | RP1-239B22.1  | ENSG00000188211 | 1729 | 0.25 | 0.2  | 1 | 0.054   | NA |
| chr11 | 17497463 | 17498626 | ABCC8         | ENSG00000006071 | 310  | 0.19 | 0.2  | 1 | -0.0017 | NA |
| chr11 | 17717505 | 17717767 | RP11-358H18.2 | ENSG00000255335 | 851  | 0.32 | 0.35 | 1 | -0.022  | NA |
| chr11 | 18127296 | 18127711 | SAAL1         | ENSG00000166788 | 63   | 0.25 | 0.25 | 1 | -0.0005 | NA |
| chr11 | 18210884 | 18211205 | AC090099.2    | ENSG00000224002 | -3   | 0.96 | 1    | 1 | -0.044  | NA |
| chr11 | 19261912 | 19262156 | E2F8          | ENSG00000129173 | 417  | 0.21 | 0.21 | 1 | 0.0043  | NA |
| chr11 | 20385161 | 20385673 | HTATIP2       | ENSG00000109854 | 186  | 0.21 | 0.21 | 1 | 0.0072  | NA |
| chr11 | 23426952 | 23427349 | RP11-787P24.1 | ENSG00000255293 | 1799 | 1    | 0.99 | 1 | 0.01    | NA |
| chr11 | 24518224 | 24518738 | LUZP2         | ENSG00000187398 | -35  | 0.2  | 0.2  | 1 | 0.00072 | NA |
| chr11 | 28131863 | 28132221 | METTL15       | ENSG00000169519 | 180  | 0.16 | 0.17 | 1 | -0.014  | NA |
| chr11 | 32112394 | 32113277 | RCN1          | ENSG00000049449 | 385  | 0.26 | 0.26 | 1 | -0.0016 | NA |
| chr11 | 32605183 | 32605729 | EIF3M         | ENSG00000149100 | 112  | 0.23 | 0.22 | 1 | 0.0098  | NA |
| chr11 | 33182987 | 33183264 | CSTF3         | ENSG00000176102 | -119 | 0.15 | 0.15 | 1 | -0.0035 | NA |
| chr11 | 33757476 | 33758122 | CD59          | ENSG00000085063 | 155  | 0.22 | 0.22 | 1 | 0.0022  | NA |
| chr11 | 45307441 | 45307975 | SYT13         | ENSG00000019505 | -233 | 0.19 | 0.19 | 1 | -0.0054 | NA |
| chr11 | 45939296 | 45940141 | PEX16         | ENSG00000121680 | -342 | 0.23 | 0.23 | 1 | -0.0012 | NA |
| chr11 | 46366876 | 46367101 | DGKZ          | ENSG00000149091 | 35   | 0.8  | 0.8  | 1 | -0.0019 | NA |
| chr11 | 46615197 | 46615664 | AMBRA1        | ENSG00000110497 | 68   | 0.24 | 0.23 | 1 | 0.003   | NA |

|       |          |          |               |                 |      |      |      |   |         |    |
|-------|----------|----------|---------------|-----------------|------|------|------|---|---------|----|
| chr11 | 47236404 | 47236933 | DDB2          | ENSG00000134574 | 175  | 0.21 | 0.23 | 1 | -0.021  | NA |
| chr11 | 48901697 | 48901915 | RP11-56P9.5   | ENSG00000255551 | 143  | 1    | 0.93 | 1 | 0.072   | NA |
| chr11 | 49872066 | 49872440 | RP11-163O19.1 | ENSG00000254714 | 72   | 0.96 | 1    | 1 | -0.04   | NA |
| chr11 | 57520333 | 57520753 | CTNND1        | ENSG00000198561 | -172 | 0.96 | 0.97 | 1 | -0.015  | NA |
| chr11 | 58940830 | 58941052 | DTX4          | ENSG00000110042 | 976  | 0.2  | 0.19 | 1 | 0.007   | NA |
| chr11 | 62358813 | 62359674 | TUT1          | ENSG00000149016 | -248 | 0.22 | 0.22 | 1 | 0.0014  | NA |
| chr11 | 62379638 | 62380556 | EML3          | ENSG00000149499 | -345 | 0.25 | 0.25 | 1 | 0.00085 | NA |
| chr11 | 62389337 | 62389791 | B3GAT3        | ENSG00000149541 | -108 | 0.32 | 0.32 | 1 | -0.0055 | NA |
| chr11 | 62476770 | 62477481 | BSCL2         | ENSG00000168000 | -333 | 0.19 | 0.2  | 1 | -0.0012 | NA |
| chr11 | 63258378 | 63258804 | HRASLS5       | ENSG00000168004 | -180 | 1    | 0.5  | 1 | 0.5     | NA |
| chr11 | 63803375 | 63804365 | RP11-21A7A.2  | ENSG00000256824 | 428  | 0.19 | 0.2  | 1 | -0.004  | NA |
| chr11 | 64038964 | 64039306 | BAD           | ENSG00000002330 | 205  | 0.31 | 0.32 | 1 | -0.0091 | NA |
| chr11 | 64055167 | 64055388 | GPR137        | ENSG00000173264 | -278 | 0.89 | 0.91 | 1 | -0.02   | NA |
| chr11 | 64126430 | 64126960 | RPS6KA4       | ENSG00000162302 | 75   | 0.23 | 0.24 | 1 | -0.0077 | NA |
| chr11 | 64405451 | 64406006 | NRXN2         | ENSG00000110076 | -811 | 0.26 | 0.23 | 1 | 0.033   | NA |
| chr11 | 64478843 | 64479598 | NRXN2         | ENSG00000110076 | 997  | 0.22 | 0.21 | 1 | 0.0082  | NA |
| chr11 | 64684599 | 64684826 | ATG2A         | ENSG00000110046 | -34  | 0.25 | 0.2  | 1 | 0.053   | NA |
| chr11 | 65343329 | 65343849 | EHBP1L1       | ENSG00000173442 | 80   | 0.24 | 0.24 | 1 | -0.0015 | NA |
| chr11 | 65381582 | 65381872 | MAP3K11       | ENSG00000173327 | -20  | 0.24 | 0.24 | 1 | 0.00012 | NA |
| chr11 | 65487660 | 65488348 | RNASEH2C      | ENSG00000172922 | -65  | 0.18 | 0.18 | 1 | -0.0007 | NA |
| chr11 | 65639835 | 65641374 | EFEMP2        | ENSG00000172638 | -479 | 0.3  | 0.3  | 1 | 0.0018  | NA |
| chr11 | 66034751 | 66035054 | RP11-867G23.2 | ENSG00000254762 | 698  | 0.23 | 0.24 | 1 | -0.012  | NA |
| chr11 | 66049750 | 66050229 | CNIH2         | ENSG00000174871 | -76  | 0.23 | 0.33 | 1 | -0.1    | NA |
| chr11 | 66188130 | 66189397 | NPAS4         | ENSG00000174576 | 288  | 0.23 | 0.23 | 1 | 0.0037  | NA |
| chr11 | 66247269 | 66248249 | DPP3          | ENSG00000254986 | 275  | 0.29 | 0.29 | 1 | 0.0039  | NA |
| chr11 | 66326639 | 66326840 | CTD-3074O7.2  | ENSG00000250105 | 1116 | 0.33 | 0.29 | 1 | 0.047   | NA |
| chr11 | 66360097 | 66360834 | CCS           | ENSG00000173992 | 173  | 0.33 | 0.34 | 1 | -0.0031 | NA |
| chr11 | 66529656 | 66529896 | RP11-658F2.3  | ENSG00000213409 | 94   | 1    | 0.98 | 1 | 0.024   | NA |
| chr11 | 67166292 | 67166522 | PPP1CA        | ENSG00000172531 | 670  | 0.75 | 1    | 1 | -0.25   | NA |
| chr11 | 67572486 | 67573851 | RP11-119D9.2  | ENSG00000160172 | -384 | 0.23 | 0.23 | 1 | -0.0013 | NA |



|       |           |           |               |                 |       |      |      |   |         |    |
|-------|-----------|-----------|---------------|-----------------|-------|------|------|---|---------|----|
| chr11 | 67764918  | 67765256  | UNC93B1       | ENSG00000110057 | 1577  | 1    | 1    | 1 | 0       | NA |
| chr11 | 67895786  | 67896104  | CTD-2655K5.1  | ENSG00000255236 | -1320 | 0.22 | 0.21 | 1 | 0.0052  | NA |
| chr11 | 68178918  | 68179162  | LRP5          | ENSG00000162337 | 1543  | 0.95 | 0.96 | 1 | -0.0019 | NA |
| chr11 | 68216289  | 68216547  | LRP5          | ENSG00000162337 | 1969  | 1    | 1    | 1 | 0       | NA |
| chr11 | 71814203  | 71814529  | LAMTOR1       | ENSG00000149357 | -84   | 0.23 | 0.23 | 1 | 0.0063  | NA |
| chr11 | 71950815  | 71951408  | PHOX2A        | ENSG00000165462 | 1125  | 0.22 | 0.21 | 1 | 0.014   | NA |
| chr11 | 72465884  | 72466209  | STARD10-AS1   | ENSG00000255709 | -328  | 0.92 | 0.91 | 1 | 0.0057  | NA |
| chr11 | 75277366  | 75278032  | SERPINH1      | ENSG00000149257 | -1128 | 0.89 | 0.88 | 1 | 0.0053  | NA |
| chr11 | 76813889  | 76814339  | OMP           | ENSG00000254550 | 228   | 1    | 0.88 | 1 | 0.12    | NA |
| chr11 | 77524642  | 77524844  | AP000580.1    | ENSG00000219529 | -21   | 0.97 | 1    | 1 | -0.03   | NA |
| chr11 | 78614205  | 78614597  | ODZ4          | ENSG00000149256 | 530   | 0.96 | 0.97 | 1 | -0.0069 | NA |
| chr11 | 82400585  | 82400858  | RP11-742N3.1  | ENSG00000227097 | 120   | 0.99 | 0.98 | 1 | 0.011   | NA |
| chr11 | 85645714  | 85646191  | RP11-878E11.1 | ENSG00000254479 | 172   | 0.67 | 0.65 | 1 | 0.018   | NA |
| chr11 | 85955808  | 85956517  | EED           | ENSG00000074266 | 347   | 0.27 | 0.29 | 1 | -0.015  | NA |
| chr11 | 86748660  | 86749093  | TMEM135       | ENSG00000166575 | -10   | 0.19 | 0.17 | 1 | 0.023   | NA |
| chr11 | 89463449  | 89463690  | RP11-313I2.5  | ENSG00000255540 | -616  | 1    | 0.97 | 1 | 0.03    | NA |
| chr11 | 92615835  | 92616668  | FAT3          | ENSG00000165323 | -214  | 0.98 | 0.99 | 1 | -0.0031 | NA |
| chr11 | 93394678  | 93395273  | KIAA1731      | ENSG00000166004 | 170   | 0.21 | 0.2  | 1 | 0.0034  | NA |
| chr11 | 93861560  | 93862773  | PANX1         | ENSG00000110218 | 72    | 0.38 | 0.38 | 1 | 0.0028  | NA |
| chr11 | 94473535  | 94474338  | RP11-867G2.8  | ENSG00000255929 | -415  | 0.22 | 0.22 | 1 | 0.0011  | NA |
| chr11 | 103907405 | 103907990 | PDGFD         | ENSG00000170962 | 57    | 0.98 | 0.97 | 1 | 0.01    | NA |
| chr11 | 104034536 | 104035058 | PDGFD         | ENSG00000170962 | 38    | 0.27 | 0.28 | 1 | -0.006  | NA |
| chr11 | 107728949 | 107729586 | SLC35F2       | ENSG00000110660 | 20    | 0.23 | 0.23 | 1 | -0.0039 | NA |
| chr11 | 108093211 | 108093969 | ATM           | ENSG00000149311 | 379   | 0.17 | 0.21 | 1 | -0.047  | NA |
| chr11 | 111797551 | 111798030 | DIXDC1        | ENSG00000150764 | -78   | 0.18 | 0.16 | 1 | 0.017   | NA |
| chr11 | 111847927 | 111848401 | DIXDC1        | ENSG00000150764 | 131   | 0.21 | 0.2  | 1 | 0.008   | NA |
| chr11 | 111957352 | 111957681 | TIMM8B        | ENSG00000150779 | -70   | 0.33 | 0.25 | 1 | 0.083   | NA |
| chr11 | 112160815 | 112161201 | RP11-356J5.12 | ENSG00000250303 | 84    | 0.29 | 0.28 | 1 | 0.0025  | NA |
| chr11 | 113745816 | 113746693 | USP28         | ENSG00000048028 | -36   | 0.23 | 0.23 | 1 | -0.0036 | NA |
| chr11 | 116706481 | 116706910 | AP006216.12   | ENSG00000235910 | -138  | 0.21 | 0.21 | 1 | 0.0013  | NA |

|       |           |           |               |                 |       |      |      |    |        |    |
|-------|-----------|-----------|---------------|-----------------|-------|------|------|----|--------|----|
| chr11 | 118230164 | 118230368 | UBE4A         | ENSG00000110344 | -34   | 0.75 | 0.77 | 1  | -0.019 | NA |
| chr11 | 118443087 | 118443631 | ARCN1         | ENSG00000095139 | 254   | 0.24 | 0.23 | 1  | 0.0092 | NA |
| chr11 | 120110497 | 120110719 | POU2F3        | ENSG00000137709 | -295  | 0.17 | 0.12 | 1  | 0.047  | NA |
| chr11 | 125495233 | 125495866 | CHEK1         | ENSG00000149554 | -11   | 0.33 | 0.28 | 1  | 0.055  | NA |
| chr11 | 125774292 | 125774584 | DDX25         | ENSG00000109832 | 34    | 0.22 | 0.24 | 1  | -0.01  | NA |
| chr11 | 133734701 | 133735164 | RP11-259P6.3  | ENSG00000213153 | 590   | 0.98 | 1    | 1  | -0.015 | NA |
| chr11 | 134122762 | 134122981 | THYN1         | ENSG00000151500 | 271   | 0.2  | 0.2  | 1  | 0      | NA |
| chr11 | 134336292 | 134336502 | RP11-627G23.1 | ENSG00000255545 | 318   | 0.29 | 0.31 | 1  | -0.029 | NA |
| chr11 | 471871    | 472145    | PTDSS2        | ENSG00000174915 | -1912 | 1    | NA   | NA | NA     | NA |
| chr11 | 910242    | 910500    | CHID1         | ENSG00000177830 | 420   | NA   | 0.38 | NA | NA     | NA |
| chr11 | 1010479   | 1010753   | AP2A2         | ENSG00000183020 | 1261  | 1    | NA   | NA | NA     | NA |
| chr11 | 1033084   | 1033356   | MUC6          | ENSG00000184956 | -11   | 0.83 | NA   | NA | NA     | NA |
| chr11 | 1430939   | 1431834   | BRSK2         | ENSG00000174672 | 397   | 0.56 | NA   | NA | NA     | NA |
| chr11 | 1977523   | 1977765   | MRPL23        | ENSG00000214026 | 837   | 0.79 | NA   | NA | NA     | NA |
| chr11 | 2965785   | 2966102   | AC131971.3    | ENSG00000224636 | 275   | 0.92 | NA   | NA | NA     | NA |
| chr11 | 8190226   | 8190671   | RIC3          | ENSG00000166405 | 88    | 0.15 | NA   | NA | NA     | NA |
| chr11 | 17249822  | 17250033  | RP11-452G18.2 | ENSG00000197149 | 101   | 0.97 | NA   | NA | NA     | NA |
| chr11 | 27742059  | 27742273  | BDNF          | ENSG00000176697 | 104   | 0.75 | NA   | NA | NA     | NA |
| chr11 | 44332314  | 44332757  | ALX4          | ENSG00000052850 | -819  | NA   | NA   | NA | NA     | NA |
| chr11 | 46396983  | 46397186  | DGKZ          | ENSG00000149091 | 510   | 1    | NA   | NA | NA     | NA |
| chr11 | 57414400  | 57414664  | AP000662.4    | ENSG00000254602 | 173   | NA   | 0.19 | NA | NA     | NA |
| chr11 | 62690974  | 62691488  | CHRM1         | ENSG00000168539 | -1952 | 0.33 | NA   | NA | NA     | NA |
| chr11 | 63679403  | 63679638  | RCOR2         | ENSG00000167771 | 259   | NA   | 1    | NA | NA     | NA |
| chr11 | 63887355  | 63887600  | RP11-21A7A.3  | ENSG00000256341 | -795  | 0.81 | NA   | NA | NA     | NA |
| chr11 | 67432755  | 67433051  | ALDH3B2       | ENSG00000132746 | -131  | 1    | NA   | NA | NA     | NA |
| chr11 | 67789044  | 67789339  | ALDH3B1       | ENSG00000006534 | -121  | 1    | NA   | NA | NA     | NA |
| chr11 | 74204135  | 74204856  | LIPT2         | ENSG00000175536 | -135  | 0.29 | NA   | NA | NA     | NA |
| chr11 | 75922169  | 75922376  | WNT11         | ENSG00000085741 | -469  | NA   | 0.69 | NA | NA     | NA |
| chr11 | 77446042  | 77446274  | FTH1P16       | ENSG00000227376 | -87   | NA   | 1    | NA | NA     | NA |
| chr11 | 78285405  | 78285995  | NARS2         | ENSG00000137513 | -137  | 1    | NA   | NA | NA     | NA |

|       |           |           |               |                 |       |      |      |          |      |    |
|-------|-----------|-----------|---------------|-----------------|-------|------|------|----------|------|----|
| chr11 | 88070501  | 88071042  | CTSC          | ENSG00000109861 | 69    | NA   | 0.31 | NA       | NA   | NA |
| chr11 | 89713070  | 89713801  | RP11-529A4.7  | ENSG00000255305 | 1727  | 1    | NA   | NA       | NA   | NA |
| chr11 | 89786602  | 89786956  | RP11-529A4.12 | ENSG00000254916 | 125   | 0.8  | NA   | NA       | NA   | NA |
| chr11 | 93063598  | 93064076  | CCDC67        | ENSG00000165325 | 69    | NA   | 0.12 | NA       | NA   | NA |
| chr11 | 94245546  | 94245891  | RP11-867G2.2  | ENSG00000257057 | -29   | 0.5  | NA   | NA       | NA   | NA |
| chr11 | 105481126 | 105481422 | GRIA4         | ENSG00000152578 | -125  | NA   | 0.17 | NA       | NA   | NA |
| chr11 | 116691949 | 116692360 | APOA4         | ENSG00000110244 | 1868  | 0.87 | NA   | NA       | NA   | NA |
| chr12 | 54387825  | 54388732  | HOXC9         | ENSG00000180806 | -401  | 0.47 | 0.17 | 1.20E-09 | 0.29 | NA |
| chr12 | 101801047 | 101802153 | ARL1          | ENSG00000120805 | -361  | 0.33 | 0.14 | 1.20E-08 | 0.19 | NA |
| chr12 | 56329518  | 56329790  | DGKA          | ENSG00000065357 | 36    | 0.86 | 0.32 | 1.70E-08 | 0.54 | NA |
| chr12 | 101109863 | 101111622 | ANO4          | ENSG00000151572 | -562  | 0.52 | 0.19 | 1.80E-08 | 0.33 | NA |
| chr12 | 96350518  | 96350721  | AMDHD1        | ENSG00000139344 | 200   | 0.83 | 0.35 | 3.90E-08 | 0.48 | NA |
| chr12 | 3067960   | 3069444   | TEAD4         | ENSG00000197905 | 206   | 0.28 | 0.15 | 4.40E-08 | 0.13 | NA |
| chr12 | 52473350  | 52474178  | RP1-288H2.1   | ENSG00000257542 | 284   | 0.93 | 0.77 | 5.50E-08 | 0.16 | NA |
| chr12 | 94541727  | 94544000  | PLXNC1        | ENSG00000136040 | 364   | 0.29 | 0.14 | 5.60E-08 | 0.15 | NA |
| chr12 | 42982832  | 42983881  | PRICKLE1      | ENSG00000139174 | 122   | 0.33 | 0.12 | 7.30E-08 | 0.21 | NA |
| chr12 | 65514878  | 65515863  | WIF1          | ENSG00000156076 | -24   | 0.6  | 0.34 | 1.20E-07 | 0.26 | NA |
| chr12 | 132862586 | 132862956 | GALNT9        | ENSG00000182870 | 286   | 0.96 | 0.5  | 1.70E-07 | 0.46 | NA |
| chr12 | 133812403 | 133813102 | AC226150.2    | ENSG00000227059 | -338  | 0.76 | 0.55 | 2.10E-07 | 0.21 | NA |
| chr12 | 96252020  | 96252246  | RP11-536G4.2  | ENSG00000258343 | 338   | 0.65 | 0.13 | 2.30E-07 | 0.51 | NA |
| chr12 | 50361367  | 50361652  | AQP6          | ENSG00000086159 | 487   | 1    | 0.2  | 2.50E-07 | 0.8  | NA |
| chr12 | 81471569  | 81472119  | ACSS3         | ENSG00000111058 | 8     | 0.5  | 0.23 | 2.80E-07 | 0.27 | NA |
| chr12 | 51157498  | 51158842  | ATF1          | ENSG00000123268 | 309   | 0.29 | 0.11 | 3.70E-07 | 0.17 | NA |
| chr12 | 124456573 | 124458728 | CCDC92        | ENSG00000119242 | -1052 | 0.35 | 0.21 | 4.10E-07 | 0.13 | NA |
| chr12 | 120554162 | 120555224 | RAB35         | ENSG00000111737 | -153  | 0.33 | 0.18 | 4.20E-07 | 0.14 | NA |
| chr12 | 96183873  | 96185199  | NTN4          | ENSG00000074527 | -449  | 0.24 | 0.12 | 5.90E-07 | 0.12 | NA |
| chr12 | 109490238 | 109490673 | USP30         | ENSG00000135093 | 64    | 0.38 | 0.13 | 8.10E-07 | 0.25 | NA |
| chr12 | 117627650 | 117628488 | FBXO21        | ENSG00000135108 | 22    | 0.33 | 0.18 | 9.10E-07 | 0.15 | NA |
| chr12 | 96883286  | 96883737  | C12orf63      | ENSG00000188596 | 126   | 0.39 | 0.14 | 9.20E-07 | 0.24 | NA |
| chr12 | 5603587   | 5603990   | NTF3          | ENSG00000185652 | 490   | 0.88 | 0.55 | 1.50E-06 | 0.33 | NA |

|       |           |           |               |                 |       |      |      |          |       |    |
|-------|-----------|-----------|---------------|-----------------|-------|------|------|----------|-------|----|
| chr12 | 1099557   | 1100785   | ERC1          | ENSG00000082805 | 496   | 0.18 | 0.46 | 1.90E-06 | -0.28 | NA |
| chr12 | 133337981 | 133338989 | ANKLE2        | ENSG00000176915 | -86   | 0.31 | 0.15 | 2.80E-06 | 0.16  | NA |
| chr12 | 131647814 | 131648375 | RP11-638F5.1  | ENSG00000204603 | -1462 | 0.92 | 0.73 | 3.60E-06 | 0.19  | NA |
| chr12 | 124118097 | 124118479 | EIF2B1        | ENSG00000111361 | -137  | 0.58 | 0.23 | 4.10E-06 | 0.35  | NA |
| chr12 | 48723323  | 48723876  | H1FNT         | ENSG00000187166 | 836   | 0.95 | 0.78 | 5.20E-06 | 0.16  | NA |
| chr12 | 104323017 | 104324811 | HSP90B1       | ENSG00000166598 | 29    | 0.42 | 0.19 | 5.20E-06 | 0.23  | NA |
| chr12 | 48399168  | 48399372  | COL2A1        | ENSG00000139219 | -1001 | 0.64 | 0.29 | 5.80E-06 | 0.35  | NA |
| chr12 | 49760221  | 49761127  | SPATS2        | ENSG00000123352 | 307   | 0.27 | 0.15 | 8.60E-06 | 0.12  | NA |
| chr12 | 6472660   | 6473322   | SCNN1A        | ENSG00000111319 | -200  | 0.68 | 0.46 | 1.20E-05 | 0.22  | NA |
| chr12 | 9066946   | 9067480   | PHC1          | ENSG00000111752 | 64    | 0.51 | 0.18 | 1.20E-05 | 0.33  | NA |
| chr12 | 24714956  | 24716243  | RP11-444D3.1  | ENSG00000255864 | -283  | 0.35 | 0.19 | 1.20E-05 | 0.16  | NA |
| chr12 | 49729728  | 49731162  | C1QL4         | ENSG00000186897 | 526   | 0.52 | 0.32 | 1.30E-05 | 0.2   | NA |
| chr12 | 54360374  | 54360660  | HOTAIR        | ENSG00000228630 | -103  | 0.99 | 0.7  | 1.60E-05 | 0.29  | NA |
| chr12 | 96793191  | 96794530  | CDK17         | ENSG00000059758 | -8    | 0.24 | 0.14 | 2.10E-05 | 0.096 | NA |
| chr12 | 123634826 | 123636176 | PITPNM2       | ENSG00000090975 | -939  | 0.27 | 0.15 | 2.10E-05 | 0.12  | NA |
| chr12 | 117316389 | 117317611 | HRK           | ENSG00000135116 | 422   | 0.44 | 0.25 | 2.30E-05 | 0.19  | NA |
| chr12 | 128751041 | 128753151 | TMEM132C      | ENSG00000181234 | 148   | 0.31 | 0.16 | 2.90E-05 | 0.15  | NA |
| chr12 | 99139386  | 99139769  | ANKS1B        | ENSG00000185046 | 40    | 0.98 | 0.62 | 3.50E-05 | 0.36  | NA |
| chr12 | 13197238  | 13197781  | KIAA1467      | ENSG00000084444 | 194   | 0.27 | 0.12 | 3.60E-05 | 0.14  | NA |
| chr12 | 120806251 | 120807026 | MSI1          | ENSG00000135097 | 345   | 0.49 | 0.24 | 3.80E-05 | 0.25  | NA |
| chr12 | 132413338 | 132414801 | PUS1          | ENSG00000177192 | 324   | 0.34 | 0.19 | 3.90E-05 | 0.15  | NA |
| chr12 | 127210778 | 127211651 | RP11-173C20.1 | ENSG00000189238 | 398   | 0.34 | 0.19 | 4.60E-05 | 0.16  | NA |
| chr12 | 81102034  | 81102716  | MYF6          | ENSG00000111046 | 1098  | 0.8  | 0.58 | 4.70E-05 | 0.22  | NA |
| chr12 | 133136392 | 133137480 | FBRSL1        | ENSG00000112787 | 307   | 0.41 | 0.21 | 6.20E-05 | 0.2   | NA |
| chr12 | 48153329  | 48153551  | RAPGEF3       | ENSG00000079337 | -579  | 0.74 | 0.27 | 6.50E-05 | 0.47  | NA |
| chr12 | 53591254  | 53591767  | ITGB7         | ENSG00000139626 | -17   | 0.26 | 0.44 | 6.70E-05 | -0.18 | NA |
| chr12 | 44229710  | 44230164  | TMEM117       | ENSG00000139173 | 167   | 0.26 | 0.14 | 7.30E-05 | 0.12  | NA |
| chr12 | 130387609 | 130389139 | TMEM132D      | ENSG00000151952 | -163  | 0.31 | 0.19 | 7.40E-05 | 0.12  | NA |
| chr12 | 133463807 | 133464858 | CHFR          | ENSG00000072609 | -224  | 0.41 | 0.2  | 8.10E-05 | 0.21  | NA |
| chr12 | 56472792  | 56474393  | ERBB3         | ENSG00000065361 | -49   | 0.33 | 0.2  | 8.50E-05 | 0.13  | NA |

|       |           |           |               |                 |       |      |      |          |       |    |
|-------|-----------|-----------|---------------|-----------------|-------|------|------|----------|-------|----|
| chr12 | 95610834  | 95611997  | FGD6          | ENSG00000180263 | -260  | 0.28 | 0.16 | 8.90E-05 | 0.12  | NA |
| chr12 | 56122017  | 56123186  | CD63          | ENSG00000135404 | -468  | 0.42 | 0.22 | 0.00011  | 0.2   | NA |
| chr12 | 127630511 | 127631199 | RP11-575F12.2 | ENSG00000256001 | -321  | 0.33 | 0.21 | 0.00011  | 0.12  | NA |
| chr12 | 6664425   | 6665336   | IFFO1         | ENSG00000010295 | 349   | 0.29 | 0.15 | 0.00012  | 0.14  | NA |
| chr12 | 56881401  | 56882702  | GLS2          | ENSG00000135423 | -149  | 0.39 | 0.24 | 0.00012  | 0.15  | NA |
| chr12 | 95043551  | 95044312  | TMCC3         | ENSG00000057704 | 407   | 0.32 | 0.19 | 0.00012  | 0.14  | NA |
| chr12 | 46120726  | 46124104  | ARID2         | ENSG00000189079 | -1033 | 0.25 | 0.18 | 0.00013  | 0.078 | NA |
| chr12 | 56320739  | 56321628  | WIBG          | ENSG00000170473 | -288  | 0.36 | 0.16 | 0.00013  | 0.21  | NA |
| chr12 | 49371690  | 49375550  | WNT1          | ENSG00000125084 | 1222  | 0.29 | 0.2  | 0.00014  | 0.087 | NA |
| chr12 | 123873794 | 123874597 | SETD8         | ENSG00000183955 | 377   | 0.38 | 0.15 | 0.00014  | 0.24  | NA |
| chr12 | 132434352 | 132435241 | EP400         | ENSG00000183495 | 291   | 0.27 | 0.15 | 0.00015  | 0.12  | NA |
| chr12 | 50451197  | 50451943  | ACCN2         | ENSG00000110881 | 239   | 0.4  | 0.16 | 0.00017  | 0.24  | NA |
| chr12 | 49688873  | 49691360  | PRPH          | ENSG00000135406 | 971   | 0.22 | 0.32 | 2.00E-04 | -0.1  | NA |
| chr12 | 54423427  | 54423712  | HOXC6         | ENSG00000197757 | 1427  | 0.53 | 0.26 | 2.00E-04 | 0.27  | NA |
| chr12 | 85673878  | 85674700  | ALX1          | ENSG00000180318 | 404   | 0.32 | 0.14 | 2.00E-04 | 0.18  | NA |
| chr12 | 93834935  | 93836089  | UBE2N         | ENSG00000177889 | -480  | 0.33 | 0.19 | 0.00022  | 0.14  | NA |
| chr12 | 53574025  | 53575150  | CSAD          | ENSG00000139631 | -207  | 0.35 | 0.18 | 0.00023  | 0.17  | NA |
| chr12 | 109124224 | 109125964 | CORO1C        | ENSG00000110880 | -767  | 0.27 | 0.14 | 0.00025  | 0.13  | NA |
| chr12 | 120632222 | 120632784 | GCN1L1        | ENSG00000089154 | 10    | 0.46 | 0.18 | 0.00027  | 0.28  | NA |
| chr12 | 123444211 | 123444565 | ABCB9         | ENSG00000150967 | -54   | 1    | 0.72 | 0.00028  | 0.28  | NA |
| chr12 | 50898621  | 50899164  | DIP2B         | ENSG00000066084 | 124   | 0.37 | 0.19 | 0.00029  | 0.18  | NA |
| chr12 | 129337870 | 129338653 | GLT1D1        | ENSG00000151948 | 289   | 0.31 | 0.16 | 0.00029  | 0.14  | NA |
| chr12 | 111806559 | 111807060 | FAM109A       | ENSG00000198324 | 17    | 0.37 | 0.17 | 0.00032  | 0.19  | NA |
| chr12 | 48213109  | 48214188  | HDAC7         | ENSG00000061273 | -80   | 0.41 | 0.22 | 0.00034  | 0.19  | NA |
| chr12 | 123319750 | 123321043 | HIP1R         | ENSG00000130787 | 423   | 0.42 | 0.24 | 0.00034  | 0.18  | NA |
| chr12 | 58290232  | 58290466  | RP11-620J15.2 | ENSG00000245651 | -84   | 0.09 | 0.41 | 0.00038  | -0.32 | NA |
| chr12 | 113590806 | 113591304 | CCDC42B       | ENSG00000186710 | 20    | 0.32 | 0.13 | 0.00039  | 0.19  | NA |
| chr12 | 50236638  | 50236975  | BCDIN3D       | ENSG00000186666 | 71    | 0.38 | 0.16 | 4.00E-04 | 0.22  | NA |
| chr12 | 100594486 | 100594799 | ACTR6         | ENSG00000075089 | 53    | 0.3  | 0.12 | 0.00043  | 0.18  | NA |
| chr12 | 31079243  | 31079878  | TSPAN11       | ENSG00000110900 | 198   | 0.28 | 0.12 | 0.00049  | 0.15  | NA |

|       |           |           |               |                 |       |      |      |         |       |    |
|-------|-----------|-----------|---------------|-----------------|-------|------|------|---------|-------|----|
| chr12 | 132145704 | 132146810 | 5S_rRNA       | ENSG00000212154 | 649   | 0.36 | 0.7  | 0.00049 | -0.33 | NA |
| chr12 | 54981933  | 54982591  | PPP1R1A       | ENSG00000135447 | 37    | 0.51 | 0.22 | 0.00056 | 0.29  | NA |
| chr12 | 95941906  | 95942979  | USP44         | ENSG00000136014 | -394  | 0.28 | 0.18 | 0.00057 | 0.1   | NA |
| chr12 | 13153421  | 13153749  | RP11-377D9.3  | ENSG00000255621 | 200   | 0.14 | 0.5  | 0.00058 | -0.36 | NA |
| chr12 | 64061836  | 64062774  | DPY19L2       | ENSG00000177990 | 10    | 0.28 | 0.15 | 0.00058 | 0.13  | NA |
| chr12 | 126675561 | 126676195 | RP4-765H13.1  | ENSG00000255778 | -46   | 0.84 | 0.53 | 0.00067 | 0.3   | NA |
| chr12 | 3475010   | 3475654   | RP11-476M19.2 | ENSG00000257048 | -1667 | 0.23 | 0.11 | 0.00072 | 0.12  | NA |
| chr12 | 49183049  | 49183282  | RP11-579D7.4  | ENSG00000257660 | -194  | 0.32 | 1    | 0.00079 | -0.68 | NA |
| chr12 | 57914385  | 57914820  | MBD6          | ENSG00000166987 | 109   | 0.57 | 0.23 | 0.00085 | 0.33  | NA |
| chr12 | 93322342  | 93323498  | EEA1          | ENSG00000102189 | 118   | 0.26 | 0.14 | 0.00092 | 0.12  | NA |
| chr12 | 32259249  | 32260165  | BICD1         | ENSG00000151746 | -62   | 0.29 | 0.15 | 0.00096 | 0.14  | NA |
| chr12 | 106751416 | 106751965 | POLR3B        | ENSG0000013503  | 254   | 0.32 | 0.18 | 0.0011  | 0.14  | NA |
| chr12 | 123380333 | 123380894 | VPS37B        | ENSG00000139722 | 61    | 0.3  | 0.11 | 0.0011  | 0.19  | NA |
| chr12 | 12419679  | 12420541  | LRP6          | ENSG00000070018 | -407  | 0.28 | 0.15 | 0.0012  | 0.13  | NA |
| chr12 | 16034931  | 16035836  | EPS8          | ENSG00000151491 | -120  | 0.33 | 0.19 | 0.0012  | 0.14  | NA |
| chr12 | 186863    | 187610    | IQSEC3        | ENSG00000120645 | 694   | 0.31 | 0.18 | 0.0013  | 0.13  | NA |
| chr12 | 53894450  | 53895313  | TARBP2        | ENSG00000139546 | 176   | 0.36 | 0.2  | 0.0013  | 0.15  | NA |
| chr12 | 71833192  | 71834389  | LGR5          | ENSG00000139292 | 240   | 0.16 | 0.29 | 0.0013  | -0.13 | NA |
| chr12 | 96429014  | 96429509  | LTA4H         | ENSG00000111144 | 45    | 0.33 | 0.12 | 0.0013  | 0.21  | NA |
| chr12 | 130645327 | 130648988 | RP11-143E21.7 | ENSG00000250208 | -934  | 0.29 | 0.24 | 0.0013  | 0.057 | NA |
| chr12 | 51236633  | 51236924  | TMPRSS12      | ENSG00000186452 | 75    | 0.91 | 0.53 | 0.0014  | 0.38  | NA |
| chr12 | 80083531  | 80085154  | PAWR          | ENSG00000177425 | -532  | 0.28 | 0.19 | 0.0016  | 0.091 | NA |
| chr12 | 56401083  | 56401506  | IKZF4         | ENSG00000123411 | -149  | 0.35 | 0.08 | 0.0017  | 0.26  | NA |
| chr12 | 56842846  | 56843255  | TIMELESS      | ENSG00000111602 | 150   | 0.23 | 0.13 | 0.0017  | 0.1   | NA |
| chr12 | 108908702 | 108909475 | FICD          | ENSG00000198855 | 126   | 0.27 | 0.14 | 0.0017  | 0.13  | NA |
| chr12 | 42876654  | 42878193  | PRICKLE1      | ENSG00000139174 | -549  | 0.27 | 0.16 | 0.0018  | 0.11  | NA |
| chr12 | 49412299  | 49412756  | PRKAG1        | ENSG00000181929 | -1    | 0.27 | 0.5  | 0.0018  | -0.23 | NA |
| chr12 | 89745168  | 89748144  | DUSP6         | ENSG00000139318 | -1297 | 0.31 | 0.23 | 0.0018  | 0.087 | NA |
| chr12 | 11802752  | 11802983  | ETV6          | ENSG00000139083 | 79    | 0.37 | 0.1  | 0.0019  | 0.27  | NA |
| chr12 | 30907359  | 30908245  | CAPRN2        | ENSG00000110888 | -354  | 0.3  | 0.18 | 0.002   | 0.12  | NA |

|       |           |           |              |                 |      |      |      |        |        |    |
|-------|-----------|-----------|--------------|-----------------|------|------|------|--------|--------|----|
| chr12 | 49212162  | 49212642  | CACNB3       | ENSG00000167535 | 233  | 0.33 | 0.17 | 0.0021 | 0.16   | NA |
| chr12 | 69863994  | 69864473  | FRS2         | ENSG00000166225 | 104  | 0.39 | 0.18 | 0.0021 | 0.21   | NA |
| chr12 | 3947922   | 3948620   | AC006207.1   | ENSG00000118976 | -354 | 0.95 | 0.85 | 0.0022 | 0.1    | NA |
| chr12 | 125549672 | 125550311 | AACS         | ENSG00000081760 | 66   | 0.26 | 0.12 | 0.0023 | 0.14   | NA |
| chr12 | 89919012  | 89919904  | POC1B        | ENSG00000139323 | -266 | 0.26 | 0.18 | 0.0024 | 0.081  | NA |
| chr12 | 40498962  | 40500017  | SLC2A13      | ENSG00000151229 | 172  | 0.29 | 0.18 | 0.0025 | 0.1    | NA |
| chr12 | 106696232 | 106697199 | TCP11L2      | ENSG00000166046 | 134  | 0.26 | 0.13 | 0.0025 | 0.13   | NA |
| chr12 | 132312439 | 132315739 | MMP17        | ENSG00000198598 | 1151 | 0.25 | 0.18 | 0.0025 | 0.068  | NA |
| chr12 | 132329177 | 132330089 | MMP17        | ENSG00000198598 | 218  | 0.86 | 0.96 | 0.0025 | -0.096 | NA |
| chr12 | 132627866 | 132629469 | DDX51        | ENSG00000185163 | -483 | 0.26 | 0.17 | 0.0026 | 0.085  | NA |
| chr12 | 46776731  | 46777856  | RP11-96H19.1 | ENSG00000257261 | -169 | 0.27 | 0.16 | 0.0027 | 0.11   | NA |
| chr12 | 133414254 | 133414463 | POLE         | ENSG00000177084 | -971 | 0.5  | 0.17 | 0.0028 | 0.33   | NA |
| chr12 | 64237403  | 64238401  | SRGAP1       | ENSG00000196935 | -171 | 0.26 | 0.15 | 0.0032 | 0.11   | NA |
| chr12 | 112546147 | 112546706 | NAA25        | ENSG00000111300 | 121  | 0.25 | 0.13 | 0.0033 | 0.12   | NA |
| chr12 | 56709458  | 56710110  | CNPY2        | ENSG00000257727 | -250 | 0.31 | 0.13 | 0.0034 | 0.18   | NA |
| chr12 | 100967293 | 100967845 | GAS2L3       | ENSG00000139354 | 108  | 0.3  | 0.11 | 0.0036 | 0.18   | NA |
| chr12 | 50505138  | 50506235  | C12orf62     | ENSG00000178449 | -76  | 0.29 | 0.17 | 0.0037 | 0.12   | NA |
| chr12 | 106640880 | 106642374 | CKAP4        | ENSG00000136026 | 139  | 0.2  | 0.12 | 0.0038 | 0.078  | NA |
| chr12 | 118541054 | 118542135 | VSIG10       | ENSG00000176834 | 73   | 0.36 | 0.23 | 0.0039 | 0.13   | NA |
| chr12 | 52400467  | 52401696  | GRASP        | ENSG00000161835 | 357  | 0.28 | 0.2  | 0.0041 | 0.083  | NA |
| chr12 | 131323203 | 131323959 | STX2         | ENSG00000111450 | 158  | 0.32 | 0.18 | 0.0041 | 0.14   | NA |
| chr12 | 3308812   | 3310270   | TSPAN9       | ENSG00000011105 | -800 | 0.3  | 0.22 | 0.0042 | 0.088  | NA |
| chr12 | 10264075  | 10264438  | CLEC1A       | ENSG00000150048 | -30  | 0.94 | 0.75 | 0.0042 | 0.19   | NA |
| chr12 | 2903389   | 2905189   | RP4-816N1.3  | ENSG00000256030 | -828 | 0.21 | 0.15 | 0.0043 | 0.062  | NA |
| chr12 | 121148239 | 121148853 | UNC119B      | ENSG00000175970 | 285  | 0.2  | 0.41 | 0.0043 | -0.21  | NA |
| chr12 | 14922877  | 14923974  | HIST4H4      | ENSG00000197837 | -321 | 0.26 | 0.16 | 0.0044 | 0.096  | NA |
| chr12 | 133484658 | 133485739 | CHFR         | ENSG00000072609 | 535  | 0.28 | 0.18 | 0.0047 | 0.1    | NA |
| chr12 | 57480797  | 57483116  | NAB2         | ENSG00000166886 | -721 | 0.32 | 0.22 | 0.0048 | 0.1    | NA |
| chr12 | 58025661  | 58027056  | B4GALNT1     | ENSG00000135454 | 72   | 0.25 | 0.18 | 0.0049 | 0.076  | NA |
| chr12 | 123717367 | 123718388 | C12orf65     | ENSG00000130921 | 414  | 0.34 | 0.17 | 0.0049 | 0.16   | NA |

|       |           |           |               |                 |      |      |      |        |        |    |
|-------|-----------|-----------|---------------|-----------------|------|------|------|--------|--------|----|
| chr12 | 112856457 | 112857243 | RPL6          | ENSG00000089009 | -208 | 0.16 | 0.28 | 0.0051 | -0.13  | NA |
| chr12 | 54812702  | 54813191  | ITGA5         | ENSG00000161638 | -35  | 0.26 | 0.14 | 0.0054 | 0.13   | NA |
| chr12 | 131783093 | 131784199 | 5S_rRNA       | ENSG00000212251 | 650  | 0.28 | 1    | 0.0057 | -0.72  | NA |
| chr12 | 54519768  | 54520457  | RP11-834C11.5 | ENSG00000250432 | -336 | 0.38 | 0.18 | 0.0058 | 0.2    | NA |
| chr12 | 113013099 | 113013529 | RPH3A         | ENSG00000089169 | 245  | 0.5  | 0.31 | 0.0058 | 0.18   | NA |
| chr12 | 120906678 | 120907894 | SRSF9         | ENSG00000111786 | 88   | 0.25 | 0.37 | 0.0065 | -0.13  | NA |
| chr12 | 118809324 | 118811021 | TAOK3         | ENSG00000135090 | 522  | 0.26 | 0.18 | 0.0066 | 0.076  | NA |
| chr12 | 4918273   | 4919657   | KCNA6         | ENSG00000151079 | 623  | 0.3  | 0.21 | 0.0067 | 0.089  | NA |
| chr12 | 10875137  | 10876180  | CSDA          | ENSG00000060138 | -150 | 0.16 | 0.24 | 0.0068 | -0.078 | NA |
| chr12 | 64797934  | 64798944  | XPOT          | ENSG00000184575 | 309  | 0.25 | 0.16 | 0.0072 | 0.092  | NA |
| chr12 | 312591    | 313331    | SLC6A12       | ENSG00000111181 | -288 | 0.19 | 0.32 | 0.0078 | -0.14  | NA |
| chr12 | 124196646 | 124197507 | ATP6V0A2      | ENSG00000185344 | 211  | 0.24 | 0.16 | 0.008  | 0.082  | NA |
| chr12 | 124821019 | 124821593 | NCOR2         | ENSG00000196498 | -368 | 0.94 | 0.99 | 0.0082 | -0.059 | NA |
| chr12 | 49363664  | 49364443  | WNT10B        | ENSG00000169884 | 382  | 0.71 | 0.51 | 0.0089 | 0.2    | NA |
| chr12 | 49931623  | 49933637  | KCNH3         | ENSG00000135519 | -310 | 0.26 | 0.19 | 0.0089 | 0.068  | NA |
| chr12 | 103889148 | 103889843 | C12orf42      | ENSG00000179088 | 208  | 0.28 | 0.16 | 0.009  | 0.12   | NA |
| chr12 | 62996159  | 62997632  | RP11-631N16.2 | ENSG00000257354 | 363  | 0.32 | 0.2  | 0.0094 | 0.13   | NA |
| chr12 | 117318708 | 117319521 | HRK           | ENSG00000135116 | -221 | 0.31 | 0.14 | 0.0096 | 0.17   | NA |
| chr12 | 65218245  | 65219143  | TBC1D30       | ENSG00000111490 | 342  | 0.25 | 0.14 | 0.0097 | 0.11   | NA |
| chr12 | 122240899 | 122243390 | RP11-347I19.3 | ENSG00000256392 | -835 | 0.26 | 0.18 | 0.0098 | 0.075  | NA |
| chr12 | 26985453  | 26986304  | ITPR2         | ENSG00000123104 | -164 | 0.33 | 0.18 | 0.0099 | 0.15   | NA |
| chr12 | 19282641  | 19283901  | PLEKHA5       | ENSG00000052126 | 623  | 0.3  | 0.2  | 0.01   | 0.092  | NA |
| chr12 | 56136783  | 56137784  | GDF11         | ENSG00000135414 | 219  | 0.39 | 0.18 | 0.01   | 0.21   | NA |
| chr12 | 3982246   | 3982708   | PARP11        | ENSG00000111224 | 39   | 0.2  | 0.37 | 0.011  | -0.17  | NA |
| chr12 | 52345531  | 52345903  | ACVR1B        | ENSG00000135503 | 189  | 0.37 | 0.16 | 0.011  | 0.21   | NA |
| chr12 | 64173448  | 64174238  | TMEM5         | ENSG00000118600 | 260  | 0.35 | 0.2  | 0.011  | 0.15   | NA |
| chr12 | 104682601 | 104682993 | TXNRD1        | ENSG00000198431 | 124  | 0.43 | 0.17 | 0.011  | 0.26   | NA |
| chr12 | 107486612 | 107487811 | RP11-797M17.1 | ENSG00000257548 | 135  | 0.31 | 0.2  | 0.011  | 0.1    | NA |
| chr12 | 132673993 | 132675241 | RP13-977J11.2 | ENSG00000256576 | -377 | 0.4  | 0.31 | 0.011  | 0.09   | NA |
| chr12 | 6982319   | 6982936   | SPSB2         | ENSG00000111671 | -178 | 0.32 | 0.16 | 0.012  | 0.16   | NA |



|       |           |           |             |                 |       |      |      |       |        |    |
|-------|-----------|-----------|-------------|-----------------|-------|------|------|-------|--------|----|
| chr12 | 14955991  | 14956471  | WBP11       | ENSG00000084463 | 179   | 0.38 | 0.21 | 0.012 | 0.17   | NA |
| chr12 | 43965757  | 43965986  | RP11-73B8.2 | ENSG00000257813 | -28   | 0.64 | 0.83 | 0.012 | -0.19  | NA |
| chr12 | 50426552  | 50426918  | RACGAP1     | ENSG00000161800 | 184   | 0.21 | 0.4  | 0.012 | -0.18  | NA |
| chr12 | 29533446  | 29533916  | ERGIC2      | ENSG00000087502 | 402   | 0.22 | 0.11 | 0.013 | 0.11   | NA |
| chr12 | 111842938 | 111844392 | SH2B3       | ENSG00000111252 | -87   | 0.4  | 0.29 | 0.013 | 0.11   | NA |
| chr12 | 133706528 | 133707594 | ZNF891      | ENSG00000214029 | -2    | 0.2  | 0.28 | 0.013 | -0.083 | NA |
| chr12 | 5539895   | 5540703   | NTF3        | ENSG00000185652 | -979  | 0.54 | 0.86 | 0.014 | -0.32  | NA |
| chr12 | 81110725  | 81111126  | MYF5        | ENSG00000111049 | 234   | 0.96 | 0.78 | 0.014 | 0.18   | NA |
| chr12 | 102513668 | 102514076 | NUP37       | ENSG00000075188 | -5    | 0.31 | 0.18 | 0.014 | 0.12   | NA |
| chr12 | 50297580  | 50297988  | FAIM2       | ENSG00000135472 | -132  | 0.33 | 0.2  | 0.016 | 0.13   | NA |
| chr12 | 51818460  | 51819166  | SLC4A8      | ENSG00000050438 | 258   | 0.34 | 0.21 | 0.016 | 0.13   | NA |
| chr12 | 54411709  | 54412131  | HOXC5       | ENSG00000172789 | 1026  | 0.16 | 0.43 | 0.016 | -0.27  | NA |
| chr12 | 96336245  | 96337411  | CCDC38      | ENSG00000165972 | -451  | 0.31 | 0.21 | 0.016 | 0.11   | NA |
| chr12 | 108154394 | 108155137 | PRDM4       | ENSG00000110851 | -60   | 0.23 | 0.14 | 0.017 | 0.086  | NA |
| chr12 | 133135293 | 133135722 | FBRSL1      | ENSG00000112787 | -1122 | 0.44 | 0.31 | 0.018 | 0.12   | NA |
| chr12 | 47473177  | 47474120  | FAM113B     | ENSG00000179715 | 262   | 0.26 | 0.17 | 0.019 | 0.09   | NA |
| chr12 | 63543636  | 63544967  | AVPR1A      | ENSG00000166148 | -342  | 0.35 | 0.26 | 0.019 | 0.094  | NA |
| chr12 | 111800834 | 111801244 | FAM109A     | ENSG00000198324 | 477   | 0.9  | 0.96 | 0.019 | -0.059 | NA |
| chr12 | 118573730 | 118574731 | VSIG10      | ENSG00000176834 | -477  | 0.26 | 0.18 | 0.019 | 0.083  | NA |
| chr12 | 11801853  | 11802218  | ETV6        | ENSG00000139083 | -753  | 0.23 | 0.14 | 0.02  | 0.096  | NA |
| chr12 | 111471960 | 111473546 | CUX2        | ENSG00000111249 | 925   | 0.26 | 0.2  | 0.02  | 0.058  | NA |
| chr12 | 133249979 | 133250243 | POLE        | ENSG00000177084 | 116   | 0.77 | 0.63 | 0.02  | 0.14   | NA |
| chr12 | 133294088 | 133294878 | PGAM5       | ENSG00000247077 | -69   | 0.87 | 0.95 | 0.02  | -0.079 | NA |
| chr12 | 50135029  | 50136043  | TMBIM6      | ENSG00000139644 | 209   | 0.28 | 0.16 | 0.021 | 0.12   | NA |
| chr12 | 53661928  | 53662429  | ESPL1       | ENSG00000135476 | 95    | 0.14 | 0.26 | 0.021 | -0.12  | NA |
| chr12 | 125050796 | 125052051 | NCOR2       | ENSG00000196498 | 587   | 0.28 | 0.2  | 0.021 | 0.081  | NA |
| chr12 | 12509911  | 12510428  | LOH12CR2    | ENSG00000205791 | -168  | 0.3  | 0.2  | 0.022 | 0.1    | NA |
| chr12 | 52417018  | 52417703  | NR4A1       | ENSG00000123358 | 744   | 0.32 | 0.18 | 0.022 | 0.14   | NA |
| chr12 | 53613716  | 53615103  | RARG        | ENSG00000172819 | -541  | 0.4  | 0.26 | 0.022 | 0.14   | NA |
| chr12 | 62584768  | 62586268  | FAM19A2     | ENSG00000198673 | -301  | 0.26 | 0.17 | 0.022 | 0.082  | NA |

|       |           |           |          |                 |      |      |      |       |       |    |
|-------|-----------|-----------|----------|-----------------|------|------|------|-------|-------|----|
| chr12 | 65003793  | 65004899  | RASSF3   | ENSG00000153179 | 53   | 0.21 | 0.16 | 0.022 | 0.051 | NA |
| chr12 | 98909052  | 98910261  | TMPO     | ENSG00000120802 | 366  | 0.26 | 0.19 | 0.022 | 0.079 | NA |
| chr12 | 117348645 | 117349207 | FBXW8    | ENSG00000174989 | 165  | 0.33 | 0.19 | 0.023 | 0.14  | NA |
| chr12 | 31476717  | 31479466  | FAM60A   | ENSG00000139146 | -995 | 0.27 | 0.21 | 0.025 | 0.057 | NA |
| chr12 | 38557328  | 38557693  | 5S_rRNA  | ENSG00000201708 | -193 | 0.74 | 0.87 | 0.026 | -0.13 | NA |
| chr12 | 6676999   | 6677755   | NOP2     | ENSG00000111641 | -249 | 0.31 | 0.17 | 0.027 | 0.14  | NA |
| chr12 | 51476859  | 51477552  | CSRNP2   | ENSG00000110925 | -312 | 0.3  | 0.21 | 0.027 | 0.093 | NA |
| chr12 | 57023296  | 57024233  | BAZ2A    | ENSG00000076108 | 231  | 0.3  | 0.2  | 0.027 | 0.096 | NA |
| chr12 | 4758177   | 4758431   | AKAP3    | ENSG00000111254 | -91  | 0.25 | 0.47 | 0.028 | -0.22 | NA |
| chr12 | 133146517 | 133148261 | FBRSL1   | ENSG00000112787 | -349 | 0.95 | 0.9  | 0.028 | 0.052 | NA |
| chr12 | 56511861  | 56512409  | ZC3H10   | ENSG00000135482 | 192  | 0.21 | 0.1  | 0.029 | 0.11  | NA |
| chr12 | 110887861 | 110888245 | ARPC3    | ENSG00000111229 | 37   | 0.3  | 0.19 | 0.029 | 0.11  | NA |
| chr12 | 34175230  | 34175455  | ALG10    | ENSG00000139133 | -61  | 0.6  | 1    | 0.03  | -0.4  | NA |
| chr12 | 131199824 | 131200157 | RIMBP2   | ENSG00000060709 | 836  | 0.33 | 0.18 | 0.03  | 0.15  | NA |
| chr12 | 53715133  | 53715516  | AAAS     | ENSG00000094914 | 20   | 0.27 | 0.17 | 0.031 | 0.091 | NA |
| chr12 | 110562095 | 110562700 | IFT81    | ENSG00000122970 | 257  | 0.27 | 0.19 | 0.031 | 0.085 | NA |
| chr12 | 119772353 | 119772594 | CCDC60   | ENSG00000183273 | -44  | 0.79 | 0.33 | 0.031 | 0.46  | NA |
| chr12 | 8332788   | 8333193   | FAM66C   | ENSG00000226711 | 185  | 0.32 | 0.15 | 0.033 | 0.17  | NA |
| chr12 | 59989651  | 59990507  | SLC16A7  | ENSG00000118596 | 231  | 0.19 | 0.38 | 0.033 | -0.19 | NA |
| chr12 | 28123023  | 28123773  | PTHLH    | ENSG00000087494 | -331 | 0.29 | 0.18 | 0.034 | 0.11  | NA |
| chr12 | 76477717  | 76479131  | NAP1L1   | ENSG00000187109 | -550 | 0.28 | 0.21 | 0.034 | 0.078 | NA |
| chr12 | 107167762 | 107168747 | RIC8B    | ENSG00000111785 | -119 | 0.26 | 0.18 | 0.035 | 0.079 | NA |
| chr12 | 120426547 | 120428066 | CCDC64   | ENSG00000135127 | -342 | 0.22 | 0.17 | 0.036 | 0.056 | NA |
| chr12 | 123920582 | 123921462 | RILPL2   | ENSG00000150977 | 242  | 0.25 | 0.16 | 0.037 | 0.097 | NA |
| chr12 | 50016973  | 50017466  | PRPF40B  | ENSG00000110844 | 22   | 0.31 | 0.17 | 0.039 | 0.15  | NA |
| chr12 | 132636037 | 132636303 | NOC4L    | ENSG00000184967 | 784  | 0.98 | 0.8  | 0.039 | 0.18  | NA |
| chr12 | 48577361  | 48578574  | C12orf68 | ENSG00000177875 | 601  | 0.28 | 0.2  | 0.04  | 0.078 | NA |
| chr12 | 58003880  | 58004249  | ARHGEF25 | ENSG00000240771 | 101  | 0.91 | 0.72 | 0.04  | 0.2   | NA |
| chr12 | 113772633 | 113772934 | SLC24A6  | ENSG00000089060 | -145 | 0.58 | 0.24 | 0.041 | 0.35  | NA |
| chr12 | 117319820 | 117320053 | HRK      | ENSG00000135116 | -704 | 0.29 | 0.15 | 0.041 | 0.15  | NA |

|       |           |           |               |                 |       |      |      |       |        |    |
|-------|-----------|-----------|---------------|-----------------|-------|------|------|-------|--------|----|
| chr12 | 53893195  | 53893610  | MAP3K12       | ENSG00000139625 | -162  | 0.29 | 0.14 | 0.042 | 0.15   | NA |
| chr12 | 54359658  | 54359906  | HOTAIR        | ENSG00000228630 | 632   | 0.43 | 0.25 | 0.042 | 0.18   | NA |
| chr12 | 104850253 | 104852395 | CHST11        | ENSG00000171310 | 578   | 0.3  | 0.23 | 0.042 | 0.067  | NA |
| chr12 | 114843022 | 114843610 | TBX5          | ENSG00000089225 | 573   | 0.25 | 0.16 | 0.043 | 0.094  | NA |
| chr12 | 110150047 | 110150262 | C12orf34      | ENSG00000139438 | -1879 | 0.62 | 0.28 | 0.044 | 0.34   | NA |
| chr12 | 124017593 | 124018994 | RILPL1        | ENSG00000188026 | -28   | 0.29 | 0.22 | 0.044 | 0.068  | NA |
| chr12 | 68042166  | 68043876  | DYRK2         | ENSG00000127334 | 520   | 0.26 | 0.2  | 0.045 | 0.053  | NA |
| chr12 | 131605558 | 131605767 | GPR133        | ENSG00000111452 | 418   | 0.8  | 0.93 | 0.045 | -0.13  | NA |
| chr12 | 20521616  | 20523122  | PDE3A         | ENSG00000172572 | 190   | 0.21 | 0.16 | 0.049 | 0.057  | NA |
| chr12 | 12876630  | 12879002  | RP11-180M15.4 | ENSG00000256658 | -871  | 0.28 | 0.23 | 0.05  | 0.05   | NA |
| chr12 | 54473305  | 54473562  | RP11-834C11.7 | ENSG00000250654 | 639   | 0.98 | 0.89 | 0.05  | 0.091  | NA |
| chr12 | 43944719  | 43946285  | ADAMTS20      | ENSG00000173157 | 222   | 0.33 | 0.23 | 0.051 | 0.097  | NA |
| chr12 | 49208205  | 49209439  | CACNB3        | ENSG00000167535 | 607   | 0.28 | 0.19 | 0.053 | 0.089  | NA |
| chr12 | 56360467  | 56360909  | PMEL          | ENSG00000185664 | -195  | 0.19 | 0.39 | 0.054 | -0.2   | NA |
| chr12 | 57881750  | 57882035  | MARS          | ENSG00000166986 | 85    | 0.48 | 0.26 | 0.054 | 0.22   | NA |
| chr12 | 51785279  | 51785821  | GALNT6        | ENSG00000139629 | -114  | 0.31 | 0.22 | 0.055 | 0.091  | NA |
| chr12 | 54378696  | 54380102  | HOXC10        | ENSG00000180818 | 550   | 0.28 | 0.2  | 0.055 | 0.075  | NA |
| chr12 | 111834869 | 111835085 | RP3-473L9.4   | ENSG00000257595 | 338   | 0.37 | 0.19 | 0.055 | 0.18   | NA |
| chr12 | 48152554  | 48153146  | RAPGEF3       | ENSG00000079337 | -293  | 0.23 | 0.35 | 0.056 | -0.12  | NA |
| chr12 | 44199630  | 44200405  | TWF1          | ENSG00000151239 | 35    | 0.23 | 0.31 | 0.06  | -0.084 | NA |
| chr12 | 49318486  | 49319476  | FKBP11        | ENSG00000134285 | -469  | 0.36 | 0.25 | 0.06  | 0.11   | NA |
| chr12 | 104234273 | 104235327 | NT5DC3        | ENSG00000111696 | 175   | 0.24 | 0.16 | 0.06  | 0.082  | NA |
| chr12 | 50100442  | 50101587  | FMNL3         | ENSG00000161791 | -11   | 0.23 | 0.18 | 0.061 | 0.049  | NA |
| chr12 | 52463348  | 52464202  | C12orf44      | ENSG00000123395 | 20    | 0.41 | 0.24 | 0.061 | 0.17   | NA |
| chr12 | 58130870  | 58132047  | AGAP2         | ENSG00000135439 | 161   | 0.26 | 0.2  | 0.061 | 0.064  | NA |
| chr12 | 124068935 | 124069699 | TMED2         | ENSG00000086598 | 239   | 0.27 | 0.17 | 0.063 | 0.099  | NA |
| chr12 | 133067072 | 133067735 | FBRSL1        | ENSG00000112787 | 246   | 0.28 | 0.17 | 0.063 | 0.11   | NA |
| chr12 | 113796217 | 113796847 | PLBD2         | ENSG00000151176 | 161   | 0.24 | 0.16 | 0.065 | 0.081  | NA |
| chr12 | 65174230  | 65175169  | TBC1D30       | ENSG00000111490 | 110   | 0.3  | 0.21 | 0.066 | 0.092  | NA |
| chr12 | 118454391 | 118454996 | RFC5          | ENSG00000111445 | 187   | 0.25 | 0.15 | 0.067 | 0.1    | NA |

|       |           |           |                |                 |      |      |      |       |        |    |
|-------|-----------|-----------|----------------|-----------------|------|------|------|-------|--------|----|
| chr12 | 34371627  | 34372304  | RP11-313F23.4  | ENSG00000255652 | -177 | 0.54 | 0.39 | 0.068 | 0.15   | NA |
| chr12 | 130822360 | 130822696 | PIWIL1         | ENSG00000125207 | 96   | 0.83 | 0.62 | 0.068 | 0.21   | NA |
| chr12 | 77157518  | 77158405  | ZDHHC17        | ENSG00000186908 | 78   | 0.17 | 0.22 | 0.07  | -0.051 | NA |
| chr12 | 124873241 | 124874008 | NCOR2          | ENSG00000196498 | -254 | 0.34 | 0.25 | 0.072 | 0.09   | NA |
| chr12 | 10765955  | 10766331  | MAGOHB         | ENSG00000111196 | 29   | 0.29 | 0.2  | 0.074 | 0.091  | NA |
| chr12 | 52408381  | 52408675  | GRASP          | ENSG00000161835 | 1065 | 0.64 | 0.47 | 0.074 | 0.18   | NA |
| chr12 | 27863633  | 27864081  | RP11-1060J15.4 | ENSG00000256377 | -193 | 0.29 | 0.2  | 0.075 | 0.088  | NA |
| chr12 | 48166997  | 48167578  | SLC48A1        | ENSG00000211584 | 289  | 0.3  | 0.15 | 0.075 | 0.15   | NA |
| chr12 | 53625629  | 53625993  | RARG           | ENSG00000172819 | 147  | 0.3  | 0.16 | 0.075 | 0.13   | NA |
| chr12 | 12869798  | 12871248  | CDKN1B         | ENSG00000111276 | 465  | 0.22 | 0.17 | 0.076 | 0.055  | NA |
| chr12 | 105478089 | 105478517 | ALDH1L2        | ENSG00000136010 | -81  | 0.18 | 0.33 | 0.076 | -0.15  | NA |
| chr12 | 109531107 | 109531359 | ALKBH2         | ENSG00000189046 | 31   | 0.3  | 0.14 | 0.076 | 0.16   | NA |
| chr12 | 122710054 | 122711371 | DIABLO         | ENSG00000184047 | -192 | 0.27 | 0.21 | 0.076 | 0.059  | NA |
| chr12 | 101603387 | 101603933 | SLC5A8         | ENSG00000256870 | 525  | 0.15 | 0.27 | 0.077 | -0.12  | NA |
| chr12 | 66563202  | 66563945  | TMBIM4         | ENSG00000155957 | -282 | 0.32 | 0.22 | 0.078 | 0.095  | NA |
| chr12 | 51984474  | 51985284  | SCN8A          | ENSG00000196876 | 169  | 0.32 | 0.23 | 0.079 | 0.092  | NA |
| chr12 | 107711603 | 107714107 | BTBD11         | ENSG00000151136 | 665  | 0.24 | 0.19 | 0.079 | 0.045  | NA |
| chr12 | 57940563  | 57940981  | DCTN2          | ENSG00000175203 | 131  | 0.2  | 0.12 | 0.081 | 0.08   | NA |
| chr12 | 123848617 | 123849919 | RP13-942N8.1   | ENSG00000256092 | -232 | 0.22 | 0.16 | 0.082 | 0.063  | NA |
| chr12 | 77272632  | 77273216  | CSRP2          | ENSG00000175183 | -170 | 0.19 | 0.31 | 0.083 | -0.12  | NA |
| chr12 | 107349152 | 107350089 | C12orf23       | ENSG00000151135 | 123  | 0.27 | 0.17 | 0.083 | 0.1    | NA |
| chr12 | 53472814  | 53473491  | SPRYD3         | ENSG00000167778 | 9    | 0.28 | 0.19 | 0.084 | 0.092  | NA |
| chr12 | 111020507 | 111021192 | PPTC7          | ENSG00000196850 | 276  | 0.31 | 0.18 | 0.085 | 0.13   | NA |
| chr12 | 74931492  | 74931879  | ATXN7L3B       | ENSG00000253719 | 134  | 0.24 | 0.13 | 0.086 | 0.11   | NA |
| chr12 | 4671309   | 4671704   | DYRK4          | ENSG0000010219  | 136  | 0.29 | 0.2  | 0.088 | 0.091  | NA |
| chr12 | 113530914 | 113531476 | DTX1           | ENSG00000135144 | -100 | 0.87 | 0.78 | 0.088 | 0.088  | NA |
| chr12 | 52408860  | 52409121  | GRASP          | ENSG00000161835 | 1527 | 0.7  | 0.51 | 0.091 | 0.18   | NA |
| chr12 | 96588665  | 96589145  | ELK3           | ENSG00000111145 | 513  | 0.25 | 0.39 | 0.091 | -0.15  | NA |
| chr12 | 2985978   | 2986639   | FOXM1          | ENSG00000111206 | -201 | 0.22 | 0.32 | 0.092 | -0.095 | NA |
| chr12 | 45609713  | 45610752  | ANO6           | ENSG00000177119 | 462  | 0.23 | 0.3  | 0.092 | -0.069 | NA |

|       |           |           |               |                 |      |      |      |       |        |    |
|-------|-----------|-----------|---------------|-----------------|------|------|------|-------|--------|----|
| chr12 | 52643982  | 52644411  | KRT86         | ENSG00000170442 | 1112 | 0.67 | 0.54 | 0.092 | 0.13   | NA |
| chr12 | 103311040 | 103311253 | PAH           | ENSG00000171759 | -114 | 0.57 | 0.38 | 0.094 | 0.19   | NA |
| chr12 | 29542218  | 29542838  | RP11-677C1.2  | ENSG00000257599 | 301  | 0.96 | 0.9  | 0.095 | 0.056  | NA |
| chr12 | 4383193   | 4384405   | RP11-264F23.4 | ENSG00000255920 | 432  | 0.26 | 0.19 | 0.097 | 0.069  | NA |
| chr12 | 49110055  | 49110881  | CCNT1         | ENSG00000129315 | -10  | 0.18 | 0.29 | 0.097 | -0.11  | NA |
| chr12 | 27166996  | 27167464  | TM7SF3        | ENSG00000064115 | -86  | 0.31 | 0.23 | 0.098 | 0.071  | NA |
| chr12 | 133263462 | 133264711 | POLE          | ENSG00000177084 | -172 | 0.26 | 0.21 | 0.098 | 0.052  | NA |
| chr12 | 58068473  | 58068774  | RP11-571M6.1  | ENSG00000242990 | 175  | 0.88 | 0.98 | 0.099 | -0.1   | NA |
| chr12 | 64845599  | 64846314  | TBK1          | ENSG00000183735 | 296  | 0.26 | 0.16 | 0.099 | 0.099  | NA |
| chr12 | 69004220  | 69005377  | RAP1B         | ENSG00000127314 | 179  | 0.35 | 0.26 | 0.099 | 0.089  | NA |
| chr12 | 95867584  | 95868019  | METAP2        | ENSG00000111142 | 74   | 0.23 | 0.16 | 0.099 | 0.071  | NA |
| chr12 | 27091158  | 27091857  | C12orf11      | ENSG00000064102 | -270 | 0.32 | 0.24 | 0.1   | 0.083  | NA |
| chr12 | 29935995  | 29937433  | TMTC1         | ENSG00000133687 | 17   | 0.29 | 0.23 | 0.1   | 0.058  | NA |
| chr12 | 65563195  | 65564396  | LEMD3         | ENSG00000174106 | 444  | 0.27 | 0.2  | 0.1   | 0.061  | NA |
| chr12 | 66524464  | 66524792  | LLPH          | ENSG00000139233 | -146 | 0.24 | 0.34 | 0.1   | -0.1   | NA |
| chr12 | 93963963  | 93967395  | SOCS2         | ENSG00000120833 | 1504 | 0.25 | 0.2  | 0.1   | 0.041  | NA |
| chr12 | 106977388 | 106977713 | RFX4          | ENSG00000111783 | 127  | 0.19 | 0.26 | 0.1   | -0.068 | NA |
| chr12 | 108079442 | 108079893 | PWP1          | ENSG00000136045 | 158  | 0.24 | 0.13 | 0.1   | 0.11   | NA |
| chr12 | 110437137 | 110437651 | ANKRD13A      | ENSG00000076513 | 159  | 0.32 | 0.2  | 0.1   | 0.12   | NA |
| chr12 | 113572977 | 113573758 | RASAL1        | ENSG00000111344 | -58  | 0.53 | 0.29 | 0.1   | 0.24   | NA |
| chr12 | 117798076 | 117799448 | NOS1          | ENSG00000089250 | 672  | 0.22 | 0.17 | 0.1   | 0.05   | NA |
| chr12 | 22696780  | 22697728  | KIAA0528      | ENSG00000111731 | -131 | 0.16 | 0.23 | 0.11  | -0.076 | NA |
| chr12 | 38710392  | 38710643  | ALG10B        | ENSG00000175548 | -47  | 0.28 | 0.18 | 0.11  | 0.1    | NA |
| chr12 | 39836211  | 39837499  | KIF21A        | ENSG00000139116 | -83  | 0.24 | 0.19 | 0.11  | 0.051  | NA |
| chr12 | 54019812  | 54020283  | ATF7          | ENSG00000170653 | 152  | 0.23 | 0.14 | 0.11  | 0.084  | NA |
| chr12 | 56583406  | 56583682  | SMARCC2       | ENSG00000139613 | -193 | 0.27 | 1    | 0.11  | -0.73  | NA |
| chr12 | 57118977  | 57119374  | NACA          | ENSG00000196531 | -135 | 0.18 | 0.27 | 0.11  | -0.093 | NA |
| chr12 | 57399868  | 57400226  | ZBTB39        | ENSG00000166860 | 183  | 0.37 | 0.27 | 0.11  | 0.1    | NA |
| chr12 | 59313559  | 59314452  | LRIG3         | ENSG00000139263 | -68  | 0.45 | 0.21 | 0.11  | 0.24   | NA |
| chr12 | 90101436  | 90104065  | ATP2B1        | ENSG00000070961 | -142 | 0.23 | 0.19 | 0.11  | 0.043  | NA |

|       |           |           |                    |                 |      |      |      |      |        |    |
|-------|-----------|-----------|--------------------|-----------------|------|------|------|------|--------|----|
| chr12 | 95466650  | 95467464  | NR2C1              | ENSG00000120798 | -264 | 0.27 | 0.2  | 0.11 | 0.062  | NA |
| chr12 | 132905449 | 132906206 | GALNT9             | ENSG00000182870 | -38  | 0.29 | 0.2  | 0.11 | 0.091  | NA |
| chr12 | 7079500   | 7080129   | PHB2               | ENSG00000215021 | -9   | 0.22 | 0.31 | 0.12 | -0.097 | NA |
| chr12 | 27932789  | 27933738  | KLHDC5             | ENSG00000087448 | 310  | 0.26 | 0.19 | 0.12 | 0.07   | NA |
| chr12 | 120875654 | 120876366 | COX6A1             | ENSG00000111775 | 117  | 0.2  | 0.28 | 0.12 | -0.084 | NA |
| chr12 | 120972167 | 120972447 | COQ5               | ENSG00000110871 | -70  | 0.38 | 0.19 | 0.12 | 0.19   | NA |
| chr12 | 73948     | 74950     | ABC7-42389800N19.1 | ENSG00000226210 | 108  | 0.47 | 0.21 | 0.13 | 0.25   | NA |
| chr12 | 3862068   | 3862606   | EFCAB4B            | ENSG00000130038 | -74  | 0.48 | 0.4  | 0.13 | 0.086  | NA |
| chr12 | 6809214   | 6809816   | C12orf53           | ENSG00000139200 | 81   | 0.24 | 0.12 | 0.13 | 0.12   | NA |
| chr12 | 53845668  | 53846606  | PCBP2              | ENSG00000197111 | 251  | 0.23 | 0.17 | 0.13 | 0.055  | NA |
| chr12 | 83080662  | 83081646  | TMTC2              | ENSG00000179104 | 374  | 0.26 | 0.2  | 0.13 | 0.065  | NA |
| chr12 | 132324953 | 132325406 | MMP17              | ENSG00000198598 | -102 | 0.85 | 0.93 | 0.13 | -0.081 | NA |
| chr12 | 1739286   | 1739833   | WNT5B              | ENSG00000111186 | -419 | 0.26 | 0.17 | 0.14 | 0.09   | NA |
| chr12 | 44152506  | 44152922  | PUS7L              | ENSG00000129317 | -153 | 0.2  | 0.37 | 0.14 | -0.17  | NA |
| chr12 | 48099317  | 48099905  | RPAP3              | ENSG00000005175 | 158  | 0.3  | 0.23 | 0.14 | 0.071  | NA |
| chr12 | 49245656  | 49246173  | DDX23              | ENSG00000174243 | 7    | 0.26 | 0.19 | 0.14 | 0.07   | NA |
| chr12 | 58129828  | 58130361  | AGAP2              | ENSG00000135439 | 1525 | 0.24 | 0.15 | 0.14 | 0.091  | NA |
| chr12 | 70636617  | 70637749  | CNOT2              | ENSG00000111596 | 409  | 0.18 | 0.23 | 0.14 | -0.055 | NA |
| chr12 | 99038272  | 99039483  | IKBIP              | ENSG00000166130 | -288 | 0.17 | 0.21 | 0.14 | -0.046 | NA |
| chr12 | 108522950 | 108523852 | WSCD2              | ENSG00000075035 | 153  | 0.26 | 0.2  | 0.14 | 0.059  | NA |
| chr12 | 125398558 | 125399899 | UBC                | ENSG00000150991 | -617 | 0.18 | 0.24 | 0.14 | -0.06  | NA |
| chr12 | 7036955   | 7037924   | ATN1               | ENSG00000111676 | -37  | 0.22 | 0.18 | 0.15 | 0.048  | NA |
| chr12 | 8184964   | 8185616   | FOXJ2              | ENSG00000065970 | -9   | 0.23 | 0.18 | 0.15 | 0.054  | NA |
| chr12 | 31226343  | 31227186  | DDX11              | ENSG00000013573 | -15  | 0.18 | 0.29 | 0.15 | -0.12  | NA |
| chr12 | 49738680  | 49740841  | DNAJC22            | ENSG00000178401 | -940 | 0.2  | 0.23 | 0.15 | -0.035 | NA |
| chr12 | 51419640  | 51420347  | SLC11A2            | ENSG00000110911 | -69  | 0.2  | 0.15 | 0.15 | 0.052  | NA |
| chr12 | 53441384  | 53441706  | RP11-983P16.4      | ENSG00000257337 | -711 | 0.31 | 0.21 | 0.15 | 0.1    | NA |
| chr12 | 57472274  | 57472619  | TMEM194A           | ENSG00000166881 | 128  | 0.34 | 0.19 | 0.15 | 0.15   | NA |
| chr12 | 66217627  | 66220181  | HMGA2              | ENSG00000149948 | 993  | 0.22 | 0.18 | 0.15 | 0.037  | NA |
| chr12 | 119418591 | 119418834 | SRRM4              | ENSG00000139767 | -588 | 0.47 | 0.26 | 0.15 | 0.21   | NA |

|       |           |           |               |                 |       |      |      |      |        |    |
|-------|-----------|-----------|---------------|-----------------|-------|------|------|------|--------|----|
| chr12 | 122238028 | 122239351 | RP11-347119.3 | ENSG00000256392 | -106  | 0.26 | 0.21 | 0.15 | 0.048  | NA |
| chr12 | 125347784 | 125348688 | SCARB1        | ENSG00000073060 | 93    | 0.34 | 0.26 | 0.15 | 0.081  | NA |
| chr12 | 8548855   | 8549512   | RP11-90D4.2   | ENSG00000226091 | -92   | 0.26 | 0.19 | 0.16 | 0.063  | NA |
| chr12 | 27175342  | 27175843  | MED21         | ENSG00000152944 | 113   | 0.43 | 0.1  | 0.16 | 0.33   | NA |
| chr12 | 110939456 | 110940173 | RAD9B         | ENSG00000151164 | 354   | 0.3  | 0.42 | 0.16 | -0.12  | NA |
| chr12 | 12502942  | 12503465  | MANSC1        | ENSG00000111261 | -45   | 0.16 | 0.21 | 0.17 | -0.053 | NA |
| chr12 | 42631224  | 42632619  | YAF2          | ENSG00000015153 | -607  | 0.21 | 0.17 | 0.17 | 0.036  | NA |
| chr12 | 53399872  | 53400896  | EIF4B         | ENSG00000063046 | 442   | 0.43 | 0.31 | 0.17 | 0.13   | NA |
| chr12 | 57039047  | 57039823  | ATP5B         | ENSG00000110955 | -372  | 0.35 | 0.27 | 0.17 | 0.081  | NA |
| chr12 | 121018728 | 121019369 | POP5          | ENSG00000167272 | 6     | 0.39 | 0.54 | 0.17 | -0.16  | NA |
| chr12 | 7342074   | 7342417   | PEX5          | ENSG00000139197 | 65    | 0.25 | 0.12 | 0.18 | 0.13   | NA |
| chr12 | 15941718  | 15942740  | EPS8          | ENSG00000151491 | 75    | 0.27 | 0.22 | 0.18 | 0.047  | NA |
| chr12 | 22486835  | 22488666  | ST8SIA1       | ENSG00000111728 | -653  | 0.25 | 0.29 | 0.18 | -0.046 | NA |
| chr12 | 45269830  | 45270835  | NELL2         | ENSG00000184613 | -263  | 0.26 | 0.22 | 0.18 | 0.042  | NA |
| chr12 | 48550824  | 48551518  | ASB8          | ENSG00000177981 | 76    | 0.19 | 0.3  | 0.18 | -0.11  | NA |
| chr12 | 53645719  | 53646071  | MFSD5         | ENSG00000182544 | 15    | 0.44 | 0.3  | 0.18 | 0.14   | NA |
| chr12 | 108168986 | 108169570 | ASCL4         | ENSG00000187855 | 1116  | 0.2  | 0.15 | 0.18 | 0.053  | NA |
| chr12 | 123868267 | 123869381 | SETD8         | ENSG00000183955 | 504   | 0.32 | 0.25 | 0.18 | 0.072  | NA |
| chr12 | 6602919   | 6603306   | MRPL51        | ENSG00000111639 | -106  | 0.27 | 0.16 | 0.19 | 0.11   | NA |
| chr12 | 21654396  | 21654956  | RECQL         | ENSG00000004700 | -191  | 0.3  | 0.23 | 0.19 | 0.067  | NA |
| chr12 | 26278540  | 26279707  | RP11-283G6.3  | ENSG00000256894 | -106  | 0.28 | 0.23 | 0.19 | 0.049  | NA |
| chr12 | 50418935  | 50419400  | RACGAP1       | ENSG00000161800 | 16    | 0.21 | 0.32 | 0.19 | -0.11  | NA |
| chr12 | 57521524  | 57522159  | LRP1          | ENSG00000123384 | -441  | 0.27 | 0.21 | 0.19 | 0.069  | NA |
| chr12 | 63328143  | 63329135  | PPM1H         | ENSG00000111110 | 178   | 0.31 | 0.24 | 0.19 | 0.066  | NA |
| chr12 | 72233323  | 72233635  | TBC1D15       | ENSG00000121749 | -8    | 0.54 | 0.38 | 0.19 | 0.16   | NA |
| chr12 | 131356094 | 131357228 | RAN           | ENSG00000132341 | 237   | 0.24 | 0.18 | 0.19 | 0.066  | NA |
| chr12 | 132379542 | 132380052 | ULK1          | ENSG00000177169 | 601   | 0.29 | 0.21 | 0.19 | 0.084  | NA |
| chr12 | 5541210   | 5542973   | NTF3          | ENSG00000185652 | 813   | 0.26 | 0.2  | 0.2  | 0.055  | NA |
| chr12 | 42538125  | 42538902  | GXYLT1        | ENSG00000151233 | 1     | 0.21 | 0.15 | 0.2  | 0.059  | NA |
| chr12 | 54408426  | 54408713  | HOXC6         | ENSG00000197757 | -1112 | 0.27 | 0.15 | 0.2  | 0.12   | NA |

|       |           |           |               |                 |      |      |      |      |        |    |
|-------|-----------|-----------|---------------|-----------------|------|------|------|------|--------|----|
| chr12 | 75905219  | 75905518  | KRR1          | ENSG00000111615 | 9    | 0.33 | 0.18 | 0.2  | 0.16   | NA |
| chr12 | 96587839  | 96588090  | ELK3          | ENSG00000111145 | -196 | 0.19 | 0.12 | 0.2  | 0.066  | NA |
| chr12 | 122150513 | 122151091 | TMEM120B      | ENSG00000188735 | 144  | 0.27 | 0.19 | 0.2  | 0.081  | NA |
| chr12 | 6716080   | 6716790   | CHD4          | ENSG00000111642 | 99   | 0.19 | 0.25 | 0.21 | -0.062 | NA |
| chr12 | 50221558  | 50222609  | NCKAP5L       | ENSG00000167566 | 125  | 0.42 | 0.33 | 0.21 | 0.094  | NA |
| chr12 | 69139815  | 69140206  | SLC35E3       | ENSG00000175782 | 124  | 0.31 | 0.18 | 0.21 | 0.13   | NA |
| chr12 | 69753445  | 69754088  | YEATS4        | ENSG00000127337 | 283  | 0.32 | 0.22 | 0.21 | 0.11   | NA |
| chr12 | 96389405  | 96389675  | HAL           | ENSG00000084110 | 166  | 0.96 | 1    | 0.21 | -0.043 | NA |
| chr12 | 112450905 | 112451856 | TMEM116       | ENSG00000198270 | -465 | 0.23 | 0.16 | 0.21 | 0.075  | NA |
| chr12 | 120966788 | 120967038 | COQ5          | ENSG00000110871 | 30   | 0.18 | 0.25 | 0.21 | -0.066 | NA |
| chr12 | 122235106 | 122235310 | AC084018.1    | ENSG00000212694 | -423 | 0.53 | 0.34 | 0.21 | 0.19   | NA |
| chr12 | 124246524 | 124247254 | DNAH10        | ENSG00000197653 | -153 | 0.64 | 0.59 | 0.21 | 0.049  | NA |
| chr12 | 568702    | 570362    | B4GALNT3      | ENSG00000139044 | 2    | 0.26 | 0.21 | 0.22 | 0.043  | NA |
| chr12 | 15373986  | 15374514  | RERG          | ENSG00000134533 | -48  | 0.39 | 0.11 | 0.22 | 0.27   | NA |
| chr12 | 42719761  | 42720119  | ZCRB1         | ENSG00000139168 | -141 | 0.18 | 0.12 | 0.22 | 0.065  | NA |
| chr12 | 42984087  | 42984380  | PRICKLE1      | ENSG00000139174 | -76  | 0.43 | 0.17 | 0.22 | 0.26   | NA |
| chr12 | 58013171  | 58013652  | SLC26A10      | ENSG00000135502 | 101  | 0.89 | 0.84 | 0.22 | 0.05   | NA |
| chr12 | 77718453  | 77719440  | RP1-34H18.1   | ENSG00000231121 | 525  | 0.27 | 0.17 | 0.22 | 0.1    | NA |
| chr12 | 120536640 | 120536951 | RAB35         | ENSG00000111737 | 99   | 1    | 0.93 | 0.22 | 0.073  | NA |
| chr12 | 121416485 | 121416817 | HNF1A         | ENSG00000135100 | 153  | 0.87 | 0.81 | 0.22 | 0.059  | NA |
| chr12 | 7592406   | 7593030   | RP11-157G21.2 | ENSG00000255836 | -132 | 0.29 | 0.22 | 0.23 | 0.071  | NA |
| chr12 | 41582155  | 41582975  | PDZRN4        | ENSG00000165966 | 315  | 0.21 | 0.25 | 0.23 | -0.044 | NA |
| chr12 | 65672391  | 65673250  | MSRB3         | ENSG00000174099 | 397  | 0.16 | 0.21 | 0.23 | -0.048 | NA |
| chr12 | 112123246 | 112124059 | BRAP          | ENSG00000089234 | -128 | 0.19 | 0.25 | 0.23 | -0.064 | NA |
| chr12 | 7125534   | 7126356   | LPCAT3        | ENSG00000111684 | -167 | 0.27 | 0.33 | 0.24 | -0.066 | NA |
| chr12 | 41086522  | 41087102  | CNTN1         | ENSG00000018236 | 458  | 0.19 | 0.15 | 0.24 | 0.048  | NA |
| chr12 | 56367636  | 56368172  | RAB5B         | ENSG00000111540 | 207  | 0.26 | 0.19 | 0.24 | 0.076  | NA |
| chr12 | 100535916 | 100536620 | UHRF1BP1L     | ENSG00000111647 | 334  | 0.21 | 0.17 | 0.24 | 0.042  | NA |
| chr12 | 124155578 | 124156171 | TCTN2         | ENSG00000168778 | 214  | 0.26 | 0.19 | 0.24 | 0.061  | NA |
| chr12 | 130823502 | 130824083 | PIWIL1        | ENSG00000125207 | -215 | 0.28 | 0.36 | 0.24 | -0.088 | NA |



|       |           |           |               |                 |      |      |      |      |        |    |
|-------|-----------|-----------|---------------|-----------------|------|------|------|------|--------|----|
| chr12 | 25055599  | 25056246  | BCAT1         | ENSG00000060982 | 87   | 0.28 | 0.34 | 0.25 | -0.057 | NA |
| chr12 | 49075489  | 49076301  | C12orf41      | ENSG00000139620 | 46   | 0.19 | 0.26 | 0.25 | -0.07  | NA |
| chr12 | 49463441  | 49463989  | RHEBL1        | ENSG00000167550 | -95  | 0.19 | 0.12 | 0.25 | 0.066  | NA |
| chr12 | 58158855  | 58160000  | CYP27B1       | ENSG00000111012 | 41   | 0.17 | 0.22 | 0.25 | -0.047 | NA |
| chr12 | 81330608  | 81331514  | LIN7A         | ENSG00000111052 | 422  | 0.29 | 0.2  | 0.25 | 0.085  | NA |
| chr12 | 125578348 | 125578588 | AACS          | ENSG00000081760 | 1442 | 0.66 | 0.55 | 0.25 | 0.11   | NA |
| chr12 | 6833058   | 6833491   | COPS7A        | ENSG00000111652 | 94   | 0.39 | 0.28 | 0.26 | 0.11   | NA |
| chr12 | 8542555   | 8543334   | RP11-90D4.2   | ENSG00000226091 | -11  | 0.19 | 0.16 | 0.26 | 0.032  | NA |
| chr12 | 9217328   | 9217715   | C12orf33      | ENSG00000214851 | 145  | 0.29 | 0.24 | 0.26 | 0.054  | NA |
| chr12 | 50478886  | 50479329  | SMARCD1       | ENSG00000066117 | 124  | 0.29 | 0.41 | 0.26 | -0.12  | NA |
| chr12 | 57145948  | 57146333  | PRIM1         | ENSG00000198056 | -87  | 0.37 | 0.24 | 0.26 | 0.12   | NA |
| chr12 | 58014708  | 58015697  | SLC26A10      | ENSG00000135502 | 372  | 0.26 | 0.31 | 0.26 | -0.051 | NA |
| chr12 | 58166252  | 58166741  | METTL21B      | ENSG00000123427 | 113  | 0.21 | 0.29 | 0.26 | -0.079 | NA |
| chr12 | 133757946 | 133758188 | ZNF268        | ENSG00000256825 | 72   | 0.85 | 0.59 | 0.26 | 0.26   | NA |
| chr12 | 861442    | 863413    | WNK1          | ENSG00000060237 | 668  | 0.25 | 0.22 | 0.27 | 0.029  | NA |
| chr12 | 1702638   | 1704232   | FBXL14        | ENSG00000171823 | -104 | 0.23 | 0.2  | 0.27 | 0.032  | NA |
| chr12 | 49487963  | 49488202  | DHH           | ENSG00000139549 | 520  | 0.2  | 0.14 | 0.27 | 0.06   | NA |
| chr12 | 56522240  | 56522454  | RP11-603J24.5 | ENSG00000258317 | 291  | 0.21 | 0.16 | 0.27 | 0.048  | NA |
| chr12 | 112819039 | 112819250 | C12orf51      | ENSG00000173064 | 752  | 0.13 | 0.33 | 0.27 | -0.2   | NA |
| chr12 | 130526915 | 130527117 | RP11-474D1.4  | ENSG00000214039 | -129 | 0.16 | 0.26 | 0.27 | -0.093 | NA |
| chr12 | 26348260  | 26349130  | SSPN          | ENSG00000123096 | 422  | 0.23 | 0.32 | 0.28 | -0.089 | NA |
| chr12 | 50560726  | 50561386  | LASS5         | ENSG00000139624 | 27   | 0.22 | 0.27 | 0.28 | -0.053 | NA |
| chr12 | 51663404  | 51664411  | SMAGP         | ENSG00000170545 | 87   | 0.27 | 0.23 | 0.28 | 0.041  | NA |
| chr12 | 52430519  | 52431598  | NR4A1         | ENSG00000123358 | 97   | 0.26 | 0.21 | 0.28 | 0.049  | NA |
| chr12 | 54772687  | 54773028  | ZNF385A       | ENSG00000161642 | 116  | 0.2  | 0.34 | 0.28 | -0.14  | NA |
| chr12 | 56325774  | 56326223  | DGKA          | ENSG00000065357 | 186  | 0.26 | 0.18 | 0.28 | 0.086  | NA |
| chr12 | 103218120 | 103218688 | RP11-478G16.1 | ENSG00000258169 | -227 | 0.37 | 1    | 0.28 | -0.63  | NA |
| chr12 | 54366815  | 54369103  | HOXC11        | ENSG00000123388 | 1049 | 0.23 | 0.2  | 0.29 | 0.031  | NA |
| chr12 | 69080580  | 69081152  | RP11-637A17.2 | ENSG00000247363 | -249 | 0.16 | 0.5  | 0.29 | -0.34  | NA |
| chr12 | 115120774 | 115122945 | TBX3          | ENSG00000135111 | -620 | 0.21 | 0.19 | 0.29 | 0.029  | NA |

|       |           |           |               |                 |       |      |      |      |        |    |
|-------|-----------|-----------|---------------|-----------------|-------|------|------|------|--------|----|
| chr12 | 121647705 | 121648216 | P2RX4         | ENSG00000135124 | 92    | 0.17 | 0.25 | 0.29 | -0.076 | NA |
| chr12 | 53448008  | 53448406  | RP11-983P16.4 | ENSG00000257337 | -39   | 0.19 | 0.14 | 0.3  | 0.048  | NA |
| chr12 | 53689227  | 53689570  | PFDN5         | ENSG00000123349 | 117   | 0.28 | 0.19 | 0.3  | 0.092  | NA |
| chr12 | 72056768  | 72057787  | THAP2         | ENSG00000173451 | 488   | 0.22 | 0.18 | 0.3  | 0.041  | NA |
| chr12 | 98897604  | 98897849  | RP11-181C3.1  | ENSG00000245017 | -93   | 0.6  | 0.35 | 0.3  | 0.25   | NA |
| chr12 | 110718392 | 110720062 | ATP2A2        | ENSG00000174437 | 666   | 0.26 | 0.22 | 0.3  | 0.043  | NA |
| chr12 | 110841021 | 110841548 | ANAPC7        | ENSG00000196510 | 185   | 0.45 | 0.36 | 0.3  | 0.088  | NA |
| chr12 | 125478162 | 125478849 | BRI3BP        | ENSG00000184992 | 259   | 0.28 | 0.23 | 0.3  | 0.048  | NA |
| chr12 | 1058481   | 1059430   | RAD52         | ENSG00000002016 | -270  | 0.24 | 0.2  | 0.31 | 0.039  | NA |
| chr12 | 1799874   | 1800739   | ADIPOR2       | ENSG00000006831 | 113   | 0.26 | 0.2  | 0.31 | 0.058  | NA |
| chr12 | 3599966   | 3603008   | PRMT8         | ENSG00000111218 | 1085  | 0.29 | 0.26 | 0.31 | 0.028  | NA |
| chr12 | 8849963   | 8851403   | RIMKLB        | ENSG00000166532 | 406   | 0.25 | 0.21 | 0.31 | 0.039  | NA |
| chr12 | 38532028  | 38532615  | AC079460.1    | ENSG00000239943 | 873   | 0.38 | 0.3  | 0.31 | 0.08   | NA |
| chr12 | 97300802  | 97301287  | NEDD1         | ENSG00000139350 | 43    | 0.25 | 0.21 | 0.31 | 0.047  | NA |
| chr12 | 105501333 | 105501908 | KIAA1033      | ENSG00000136051 | 128   | 0.33 | 0.55 | 0.31 | -0.21  | NA |
| chr12 | 109592315 | 109592633 | ACACB         | ENSG00000076555 | -13   | 0.28 | 0.19 | 0.31 | 0.09   | NA |
| chr12 | 118406590 | 118407364 | KSR2          | ENSG00000171435 | -189  | 0.25 | 0.19 | 0.31 | 0.054  | NA |
| chr12 | 120702976 | 120703541 | PXN           | ENSG00000089159 | 237   | 0.26 | 0.2  | 0.31 | 0.057  | NA |
| chr12 | 7023261   | 7024089   | ENO2          | ENSG00000111674 | 285   | 0.22 | 0.19 | 0.32 | 0.032  | NA |
| chr12 | 14720248  | 14721093  | PLBD1         | ENSG00000121316 | -8    | 0.38 | 0.46 | 0.32 | -0.073 | NA |
| chr12 | 46383561  | 46384756  | SCAF11        | ENSG00000139218 | 190   | 0.24 | 0.2  | 0.32 | 0.034  | NA |
| chr12 | 54346777  | 54347101  | HOXC12        | ENSG00000123407 | -1679 | 0.3  | 0.25 | 0.32 | 0.053  | NA |
| chr12 | 56651692  | 56652527  | ANKRD52       | ENSG00000139645 | 51    | 0.24 | 0.19 | 0.32 | 0.045  | NA |
| chr12 | 132834178 | 132834430 | GALNT9        | ENSG00000182870 | -23   | 0.98 | 0.92 | 0.32 | 0.064  | NA |
| chr12 | 48357195  | 48357507  | TMEM106C      | ENSG00000134291 | -1    | 0.23 | 0.31 | 0.33 | -0.088 | NA |
| chr12 | 51610892  | 51611724  | POU6F1        | ENSG00000184271 | 143   | 0.23 | 0.19 | 0.33 | 0.036  | NA |
| chr12 | 57081290  | 57082445  | PTGES3        | ENSG00000110958 | -86   | 0.28 | 0.24 | 0.33 | 0.039  | NA |
| chr12 | 58087531  | 58088029  | OS9           | ENSG00000135506 | 42    | 0.12 | 0.18 | 0.33 | -0.052 | NA |
| chr12 | 109729572 | 109729826 | FOXN4         | ENSG00000139445 | -1642 | 0.39 | 0.29 | 0.33 | 0.091  | NA |
| chr12 | 131488696 | 131488975 | GPR133        | ENSG00000111452 | 1791  | 0.67 | 0.76 | 0.33 | -0.084 | NA |

|       |           |           |                |                 |      |      |      |      |        |    |
|-------|-----------|-----------|----------------|-----------------|------|------|------|------|--------|----|
| chr12 | 6309152   | 6310392   | CD9            | ENSG00000010278 | 221  | 0.19 | 0.23 | 0.34 | -0.035 | NA |
| chr12 | 31742760  | 31744324  | RP11-820K3.5   | ENSG00000255867 | 685  | 0.24 | 0.2  | 0.34 | 0.04   | NA |
| chr12 | 1754997   | 1755243   | WNT5B          | ENSG00000111186 | 1157 | 1    | 0.98 | 0.35 | 0.019  | NA |
| chr12 | 22093954  | 22095357  | ABCC9          | ENSG00000069431 | -488 | 0.27 | 0.24 | 0.35 | 0.03   | NA |
| chr12 | 52701962  | 52702560  | RP11-845M18.6  | ENSG00000257829 | -106 | 0.23 | 0.31 | 0.35 | -0.082 | NA |
| chr12 | 56615523  | 56615767  | RNF41          | ENSG00000181852 | -18  | 0.3  | 0.1  | 0.35 | 0.2    | NA |
| chr12 | 58238840  | 58241046  | CTDSP2         | ENSG00000175215 | -626 | 0.24 | 0.22 | 0.35 | 0.026  | NA |
| chr12 | 112035612 | 112037558 | ATXN2          | ENSG00000204842 | -215 | 0.26 | 0.23 | 0.35 | 0.028  | NA |
| chr12 | 6419603   | 6420024   | PLEKHG6        | ENSG00000008323 | -91  | 0.23 | 0.18 | 0.36 | 0.052  | NA |
| chr12 | 40618355  | 40618913  | LRRK2          | ENSG00000188906 | -179 | 0.17 | 0.13 | 0.36 | 0.04   | NA |
| chr12 | 49582096  | 49582881  | TUBA1C         | ENSG00000167553 | -31  | 0.23 | 0.29 | 0.36 | -0.067 | NA |
| chr12 | 52300801  | 52301583  | ACVRL1         | ENSG00000139567 | -10  | 0.2  | 0.24 | 0.36 | -0.039 | NA |
| chr12 | 57916322  | 57916810  | MBD6           | ENSG00000166987 | 39   | 1    | 0.54 | 0.36 | 0.46   | NA |
| chr12 | 120105502 | 120106232 | PRKAB1         | ENSG00000111725 | 309  | 0.23 | 0.28 | 0.36 | -0.052 | NA |
| chr12 | 122356315 | 122356853 | WDR66          | ENSG00000158023 | 86   | 0.17 | 0.24 | 0.36 | -0.069 | NA |
| chr12 | 122750769 | 122751228 | VPS33A         | ENSG00000139719 | -135 | 0.22 | 0.17 | 0.36 | 0.056  | NA |
| chr12 | 4554405   | 4554624   | FGF6           | ENSG00000111241 | 266  | 0.94 | 0.89 | 0.37 | 0.049  | NA |
| chr12 | 9600415   | 9601259   | DDX12          | ENSG00000214826 | -28  | 0.22 | 0.14 | 0.37 | 0.083  | NA |
| chr12 | 30948548  | 30949757  | RP11-77I22.3   | ENSG00000235884 | 537  | 0.21 | 0.16 | 0.37 | 0.043  | NA |
| chr12 | 49524072  | 49525492  | RP11-386G11.10 | ENSG00000258017 | -172 | 0.28 | 0.24 | 0.37 | 0.045  | NA |
| chr12 | 54475512  | 54475816  | RP11-834C11.7  | ENSG00000250654 | -57  | 1    | 0.91 | 0.37 | 0.086  | NA |
| chr12 | 64615824  | 64616386  | C12orf66       | ENSG00000174206 | -62  | 0.24 | 0.16 | 0.37 | 0.073  | NA |
| chr12 | 122064176 | 122065142 | ORAI1          | ENSG00000182500 | 204  | 0.19 | 0.15 | 0.37 | 0.035  | NA |
| chr12 | 133065843 | 133066393 | FBRSL1         | ENSG00000112787 | -19  | 0.29 | 0.21 | 0.37 | 0.077  | NA |
| chr12 | 6798113   | 6798922   | ZNF384         | ENSG00000126746 | -59  | 0.3  | 0.24 | 0.38 | 0.061  | NA |
| chr12 | 105351573 | 105352055 | SLC41A2        | ENSG00000136052 | 252  | 0.22 | 0.18 | 0.38 | 0.04   | NA |
| chr12 | 132380629 | 132380942 | ULK1           | ENSG00000177169 | 1589 | 0.35 | 0.28 | 0.38 | 0.066  | NA |
| chr12 | 53886562  | 53887101  | MAP3K12        | ENSG00000139625 | 23   | 0.23 | 0.17 | 0.39 | 0.06   | NA |
| chr12 | 56223786  | 56224312  | DNAJC14        | ENSG00000135392 | 293  | 0.62 | 0.33 | 0.39 | 0.28   | NA |
| chr12 | 64784010  | 64784664  | C12orf56       | ENSG00000185306 | -31  | 0.38 | 0.33 | 0.39 | 0.051  | NA |

|       |           |           |               |                 |      |      |      |      |        |    |
|-------|-----------|-----------|---------------|-----------------|------|------|------|------|--------|----|
| chr12 | 82752004  | 82752746  | CCDC59        | ENSG00000133773 | -304 | 0.23 | 0.29 | 0.39 | -0.064 | NA |
| chr12 | 92538710  | 92540333  | BTG1          | ENSG00000133639 | -512 | 0.23 | 0.2  | 0.39 | 0.029  | NA |
| chr12 | 111126611 | 111127347 | HVCN1         | ENSG00000122986 | -17  | 0.19 | 0.16 | 0.39 | 0.035  | NA |
| chr12 | 25101607  | 25102073  | BCAT1         | ENSG00000060982 | 137  | 0.13 | 0.18 | 0.4  | -0.049 | NA |
| chr12 | 49390617  | 49392441  | RP11-386G11.5 | ENSG00000257913 | -621 | 0.28 | 0.24 | 0.4  | 0.036  | NA |
| chr12 | 124810739 | 124810977 | NCOR2         | ENSG00000196498 | 1273 | 0.49 | 0.65 | 0.4  | -0.16  | NA |
| chr12 | 47629034  | 47629680  | FAM113B       | ENSG00000179715 | 150  | 0.98 | 0.94 | 0.41 | 0.035  | NA |
| chr12 | 110433797 | 110434205 | GIT2          | ENSG00000139436 | 28   | 0.26 | 0.2  | 0.41 | 0.063  | NA |
| chr12 | 6861821   | 6862405   | MLF2          | ENSG00000089693 | -269 | 0.18 | 0.23 | 0.42 | -0.056 | NA |
| chr12 | 77458947  | 77459942  | E2F7          | ENSG00000165891 | -114 | 0.27 | 0.23 | 0.42 | 0.036  | NA |
| chr12 | 101673790 | 101674156 | UTP20         | ENSG00000120800 | 86   | 0.14 | 0.23 | 0.42 | -0.091 | NA |
| chr12 | 122906404 | 122907011 | CLIP1         | ENSG00000130779 | 409  | 0.27 | 0.21 | 0.42 | 0.054  | NA |
| chr12 | 120638588 | 120639116 | RPLP0         | ENSG00000089157 | -234 | 0.31 | 0.21 | 0.43 | 0.1    | NA |
| chr12 | 133429925 | 133430579 | CHFR          | ENSG00000072609 | -177 | 0.98 | 0.95 | 0.43 | 0.028  | NA |
| chr12 | 69979065  | 69979724  | CCT2          | ENSG00000166226 | 280  | 0.23 | 0.19 | 0.44 | 0.041  | NA |
| chr12 | 102270754 | 102271801 | DRAM1         | ENSG00000136048 | 148  | 0.24 | 0.22 | 0.44 | 0.025  | NA |
| chr12 | 103344398 | 103344640 | PAH           | ENSG00000171759 | 104  | 0.36 | 0.21 | 0.44 | 0.15   | NA |
| chr12 | 120314847 | 120315169 | CIT           | ENSG00000122966 | 84   | 0.29 | 0.18 | 0.44 | 0.1    | NA |
| chr12 | 6976392   | 6977393   | TPI1          | ENSG00000111669 | 199  | 0.25 | 0.22 | 0.45 | 0.035  | NA |
| chr12 | 51441598  | 51442187  | LETMD1        | ENSG00000050426 | 147  | 0.17 | 0.21 | 0.45 | -0.045 | NA |
| chr12 | 51632489  | 51633162  | DAZAP2        | ENSG00000183283 | 317  | 0.22 | 0.29 | 0.45 | -0.065 | NA |
| chr12 | 52652018  | 52652743  | RP11-845M18.1 | ENSG00000135477 | -43  | 0.39 | 0.42 | 0.45 | -0.029 | NA |
| chr12 | 56693680  | 56694345  | CS            | ENSG00000062485 | -254 | 0.23 | 0.19 | 0.45 | 0.042  | NA |
| chr12 | 94853336  | 94854307  | CCDC41        | ENSG00000173588 | -367 | 0.21 | 0.17 | 0.45 | 0.042  | NA |
| chr12 | 133194868 | 133195544 | P2RX2         | ENSG00000187848 | -160 | 0.24 | 0.28 | 0.45 | -0.036 | NA |
| chr12 | 52714800  | 52715051  | KRT83         | ENSG00000170523 | 257  | 0.66 | 0.61 | 0.46 | 0.051  | NA |
| chr12 | 93861204  | 93861539  | MRPL42        | ENSG00000198015 | 107  | 0.23 | 0.33 | 0.46 | -0.097 | NA |
| chr12 | 94580656  | 94580874  | RP11-74K11.2  | ENSG00000258035 | -945 | 0.17 | 0.28 | 0.46 | -0.11  | NA |
| chr12 | 121454153 | 121454357 | C12orf43      | ENSG00000157895 | -23  | 0.1  | 0.27 | 0.46 | -0.17  | NA |
| chr12 | 122326482 | 122327044 | HPD           | ENSG00000158104 | -246 | 0.23 | 0.27 | 0.46 | -0.037 | NA |

|       |           |           |              |                 |       |      |      |      |        |    |
|-------|-----------|-----------|--------------|-----------------|-------|------|------|------|--------|----|
| chr12 | 125002006 | 125002433 | NCOR2        | ENSG00000196498 | 621   | 0.2  | 0.29 | 0.46 | -0.093 | NA |
| chr12 | 7053149   | 7053927   | C12orf57     | ENSG00000111678 | 352   | 0.19 | 0.23 | 0.47 | -0.033 | NA |
| chr12 | 53718632  | 53719778  | AAAS         | ENSG00000094914 | -557  | 0.23 | 0.26 | 0.47 | -0.033 | NA |
| chr12 | 72665683  | 72667551  | AC087886.1   | ENSG00000236333 | -846  | 0.19 | 0.17 | 0.47 | 0.018  | NA |
| chr12 | 123236994 | 123237664 | DENR         | ENSG00000139726 | 8     | 0.21 | 0.25 | 0.47 | -0.035 | NA |
| chr12 | 12966123  | 12966349  | DDX47        | ENSG00000213782 | -14   | 0.27 | 0.13 | 0.48 | 0.14   | NA |
| chr12 | 54673814  | 54674988  | CBX5         | ENSG00000094916 | -515  | 0.36 | 0.5  | 0.48 | -0.14  | NA |
| chr12 | 76952707  | 76953830  | OSBPL8       | ENSG00000091039 | 16    | 0.19 | 0.23 | 0.48 | -0.043 | NA |
| chr12 | 117536290 | 117537421 | TESC         | ENSG00000088992 | -395  | 0.27 | 0.24 | 0.48 | 0.033  | NA |
| chr12 | 124086217 | 124087015 | DDX55        | ENSG00000111364 | -8    | 0.29 | 0.24 | 0.48 | 0.048  | NA |
| chr12 | 132334377 | 132334786 | MMP17        | ENSG00000198598 | 201   | 0.91 | 0.95 | 0.48 | -0.043 | NA |
| chr12 | 19592183  | 19593685  | AEBP2        | ENSG00000139154 | 326   | 0.15 | 0.17 | 0.49 | -0.022 | NA |
| chr12 | 33591763  | 33593050  | SYT10        | ENSG00000110975 | 175   | 0.22 | 0.2  | 0.49 | 0.019  | NA |
| chr12 | 65152869  | 65153489  | GNS          | ENSG00000135677 | 7     | 0.19 | 0.16 | 0.49 | 0.032  | NA |
| chr12 | 111051693 | 111052150 | TCTN1        | ENSG00000204852 | 89    | 0.17 | 0.14 | 0.49 | 0.03   | NA |
| chr12 | 121880053 | 121880718 | KDM2B        | ENSG00000089094 | -1338 | 0.91 | 0.94 | 0.49 | -0.021 | NA |
| chr12 | 6586820   | 6587112   | RP1-102E24.6 | ENSG00000256913 | 86    | 0.97 | 1    | 0.5  | -0.031 | NA |
| chr12 | 52994772  | 52995312  | KRT72        | ENSG00000170486 | 151   | 0.44 | 0.39 | 0.5  | 0.056  | NA |
| chr12 | 132568607 | 132569715 | EP400NL      | ENSG00000185684 | 333   | 0.24 | 0.2  | 0.5  | 0.044  | NA |
| chr12 | 132689880 | 132690197 | GALNT9       | ENSG00000182870 | 299   | 0.2  | 0.24 | 0.5  | -0.033 | NA |
| chr12 | 21680408  | 21680982  | C12orf39     | ENSG00000134548 | -175  | 0.23 | 0.2  | 0.51 | 0.027  | NA |
| chr12 | 53342805  | 53343162  | KRT18        | ENSG00000111057 | 72    | 0.42 | 0.35 | 0.51 | 0.067  | NA |
| chr12 | 70759437  | 70761052  | KCNMB4       | ENSG00000135643 | 188   | 0.23 | 0.2  | 0.51 | 0.028  | NA |
| chr12 | 48744318  | 48745099  | ZNF641       | ENSG00000167528 | -154  | 0.27 | 0.19 | 0.52 | 0.084  | NA |
| chr12 | 50188655  | 50188961  | NCKAP5L      | ENSG00000167566 | 1977  | 0.85 | 1    | 0.52 | -0.15  | NA |
| chr12 | 54332805  | 54333731  | AC012531.10  | ENSG00000249641 | 159   | 0.22 | 0.2  | 0.52 | 0.026  | NA |
| chr12 | 54348695  | 54349378  | HOXC12       | ENSG00000123407 | 418   | 0.36 | 0.31 | 0.52 | 0.05   | NA |
| chr12 | 88535735  | 88536148  | CEP290       | ENSG00000198707 | -194  | 0.26 | 0.21 | 0.52 | 0.056  | NA |
| chr12 | 102224262 | 102224614 | GNPTAB       | ENSG00000111670 | 19    | 0.27 | 0.18 | 0.52 | 0.089  | NA |
| chr12 | 102455420 | 102455983 | CCDC53       | ENSG00000120860 | 51    | 0.2  | 0.25 | 0.52 | -0.055 | NA |

|       |           |           |               |                 |       |      |      |      |        |    |
|-------|-----------|-----------|---------------|-----------------|-------|------|------|------|--------|----|
| chr12 | 104457766 | 104459087 | GLT8D2        | ENSG00000120820 | -465  | 0.28 | 0.24 | 0.52 | 0.044  | NA |
| chr12 | 110486083 | 110486574 | C12orf76      | ENSG00000174456 | -1    | 0.19 | 0.27 | 0.52 | -0.077 | NA |
| chr12 | 117175623 | 117176436 | C12orf49      | ENSG00000111412 | -388  | 0.32 | 0.28 | 0.52 | 0.039  | NA |
| chr12 | 121734045 | 121735169 | CAMKK2        | ENSG00000110931 | -118  | 0.33 | 0.29 | 0.52 | 0.043  | NA |
| chr12 | 123459151 | 123460032 | OGFOD2        | ENSG00000111325 | 364   | 0.37 | 0.46 | 0.52 | -0.089 | NA |
| chr12 | 751752    | 752014    | RP11-218M22.1 | ENSG00000177406 | 43    | 0.2  | 0.17 | 0.53 | 0.034  | NA |
| chr12 | 13152819  | 13153084  | HTR7P1        | ENSG00000183935 | 139   | 0.21 | 1    | 0.53 | -0.79  | NA |
| chr12 | 48298645  | 48299537  | VDR           | ENSG00000111424 | -305  | 0.2  | 0.23 | 0.53 | -0.027 | NA |
| chr12 | 56223263  | 56223598  | DNAJC14       | ENSG00000135392 | -43   | 0.29 | 0.22 | 0.53 | 0.063  | NA |
| chr12 | 88973460  | 88974666  | KITLG         | ENSG00000049130 | 175   | 0.18 | 0.15 | 0.53 | 0.025  | NA |
| chr12 | 6961005   | 6961873   | CDCA3         | ENSG00000111665 | -209  | 0.22 | 0.25 | 0.54 | -0.033 | NA |
| chr12 | 12849067  | 12849270  | GPR19         | ENSG00000183150 | -51   | 0.23 | 0.15 | 0.54 | 0.076  | NA |
| chr12 | 13044042  | 13044667  | GPRC5A        | ENSG00000013588 | -139  | 0.27 | 0.24 | 0.54 | 0.038  | NA |
| chr12 | 106975195 | 106975714 | RFX4          | ENSG00000111783 | -1231 | 0.31 | 0.39 | 0.54 | -0.081 | NA |
| chr12 | 112819466 | 112820489 | C12orf51      | ENSG00000173064 | -81   | 0.21 | 0.17 | 0.54 | 0.038  | NA |
| chr12 | 119419105 | 119419810 | SRRM4         | ENSG00000139767 | 157   | 0.23 | 0.18 | 0.54 | 0.044  | NA |
| chr12 | 132392635 | 132394546 | ULK1          | ENSG00000177169 | 426   | 0.92 | 0.93 | 0.54 | -0.015 | NA |
| chr12 | 6772258   | 6772579   | ING4          | ENSG00000111653 | -151  | 0.65 | 0.8  | 0.55 | -0.15  | NA |
| chr12 | 57943662  | 57943926  | KIF5A         | ENSG00000155980 | 13    | 0.42 | 0.3  | 0.55 | 0.12   | NA |
| chr12 | 120241921 | 120242233 | CIT           | ENSG00000122966 | 205   | 0.17 | 0.23 | 0.55 | -0.059 | NA |
| chr12 | 16064080  | 16064534  | DERA          | ENSG00000023697 | 201   | 0.22 | 0.18 | 0.56 | 0.042  | NA |
| chr12 | 71003624  | 71004057  | PTPRB         | ENSG00000127329 | -216  | 0.19 | 0.23 | 0.56 | -0.038 | NA |
| chr12 | 124872135 | 124872419 | NCOR2         | ENSG00000196498 | 1093  | 0.46 | 0.37 | 0.56 | 0.085  | NA |
| chr12 | 30848264  | 30849016  | IPO8          | ENSG00000133704 | 163   | 0.2  | 0.18 | 0.57 | 0.027  | NA |
| chr12 | 8171336   | 8171790   | RP11-69M1.4   | ENSG00000255581 | -1107 | 0.32 | 0.38 | 0.58 | -0.064 | NA |
| chr12 | 14134626  | 14135242  | GRIN2B        | ENSG00000150086 | -1881 | 0.36 | 0.31 | 0.58 | 0.047  | NA |
| chr12 | 26275049  | 26275878  | SSPN          | ENSG00000123096 | 478   | 0.22 | 0.3  | 0.58 | -0.082 | NA |
| chr12 | 58329723  | 58330004  | RP11-620J15.3 | ENSG00000257698 | -21   | 0.31 | 0.25 | 0.58 | 0.065  | NA |
| chr12 | 104359406 | 104360023 | C12orf73      | ENSG00000204954 | -241  | 0.6  | 0.75 | 0.58 | -0.15  | NA |
| chr12 | 561109798 | 56110298  | BLOC1S1       | ENSG00000135441 | 228   | 0.21 | 0.26 | 0.59 | -0.059 | NA |

|       |           |           |               |                 |      |      |      |      |        |    |
|-------|-----------|-----------|---------------|-----------------|------|------|------|------|--------|----|
| chr12 | 110151327 | 110152758 | C12orf34      | ENSG00000139438 | 9    | 0.24 | 0.22 | 0.59 | 0.019  | NA |
| chr12 | 121078161 | 121079483 | CABP1         | ENSG00000157782 | 467  | 0.21 | 0.19 | 0.59 | 0.019  | NA |
| chr12 | 133186737 | 133187103 | RP13-554M15.6 | ENSG00000204583 | 63   | 0.45 | 0.64 | 0.59 | -0.19  | NA |
| chr12 | 6862672   | 6862989   | MLF2          | ENSG00000089693 | -109 | 0.25 | 0.12 | 0.6  | 0.12   | NA |
| chr12 | 54402682  | 54403347  | HOXC8         | ENSG00000037965 | 182  | 0.2  | 0.24 | 0.6  | -0.036 | NA |
| chr12 | 110905879 | 110907183 | GPN3          | ENSG00000111231 | -465 | 0.27 | 0.25 | 0.6  | 0.025  | NA |
| chr12 | 2861782   | 2862472   | RP11-986G18.1 | ENSG00000256902 | 171  | 0.21 | 0.17 | 0.61 | 0.031  | NA |
| chr12 | 10826531  | 10826786  | STYK1         | ENSG00000060140 | -29  | 0.16 | 0.2  | 0.61 | -0.046 | NA |
| chr12 | 54784900  | 54785238  | ZNF385A       | ENSG00000161642 | -4   | 0.23 | 0.26 | 0.61 | -0.038 | NA |
| chr12 | 66582695  | 66583345  | IRAK3         | ENSG00000090376 | 45   | 0.21 | 0.18 | 0.61 | 0.029  | NA |
| chr12 | 76741909  | 76742286  | BBS10         | ENSG00000179941 | 79   | 0.3  | 0.2  | 0.61 | 0.1    | NA |
| chr12 | 123464820 | 123465972 | ARL6IP4       | ENSG00000182196 | 523  | 0.22 | 0.23 | 0.61 | -0.017 | NA |
| chr12 | 4430043   | 4430747   | C12orf5       | ENSG00000078237 | 24   | 0.16 | 0.18 | 0.62 | -0.022 | NA |
| chr12 | 12714633  | 12715200  | DUSP16        | ENSG00000111266 | 401  | 0.25 | 0.21 | 0.62 | 0.036  | NA |
| chr12 | 62653865  | 62654677  | FAM19A2       | ENSG00000198673 | -377 | 0.26 | 0.29 | 0.62 | -0.037 | NA |
| chr12 | 72079789  | 72080261  | TMEM19        | ENSG00000139291 | 158  | 0.21 | 0.18 | 0.62 | 0.025  | NA |
| chr12 | 100660748 | 100661646 | DEPDC4        | ENSG00000166153 | -364 | 0.35 | 0.38 | 0.62 | -0.035 | NA |
| chr12 | 109915131 | 109915638 | KCTD10        | ENSG00000110906 | -246 | 0.3  | 0.26 | 0.62 | 0.035  | NA |
| chr12 | 110337980 | 110338591 | TCHP          | ENSG00000139437 | 216  | 0.25 | 0.22 | 0.62 | 0.028  | NA |
| chr12 | 122018170 | 122018457 | KDM2B         | ENSG00000089094 | 51   | 0.18 | 0.16 | 0.62 | 0.022  | NA |
| chr12 | 27485683  | 27486676  | ARNTL2        | ENSG00000029153 | 392  | 0.27 | 0.25 | 0.63 | 0.022  | NA |
| chr12 | 28343289  | 28343907  | RP11-967K21.1 | ENSG00000247934 | -299 | 0.21 | 0.24 | 0.63 | -0.03  | NA |
| chr12 | 49453637  | 49454762  | MLL2          | ENSG00000167548 | -642 | 0.24 | 0.26 | 0.63 | -0.019 | NA |
| chr12 | 52626793  | 52627577  | KRT7          | ENSG00000135480 | 287  | 0.22 | 0.19 | 0.63 | 0.027  | NA |
| chr12 | 106532106 | 106533696 | NUAK1         | ENSG00000074590 | -410 | 0.21 | 0.23 | 0.63 | -0.018 | NA |
| chr12 | 120799372 | 120799912 | MSI1          | ENSG00000135097 | -331 | 0.19 | 0.25 | 0.63 | -0.058 | NA |
| chr12 | 132514283 | 132514525 | EP400         | ENSG00000183495 | 913  | 0.97 | 0.93 | 0.63 | 0.033  | NA |
| chr12 | 46765134  | 46766633  | SLC38A2       | ENSG00000134294 | -667 | 0.29 | 0.31 | 0.64 | -0.02  | NA |
| chr12 | 56101212  | 56101600  | ITGA7         | ENSG00000135424 | 280  | 0.39 | 0.31 | 0.65 | 0.076  | NA |
| chr12 | 57028393  | 57028747  | BAZ2A         | ENSG00000076108 | 1532 | 0.19 | 0.22 | 0.65 | -0.035 | NA |

|       |           |           |               |                 |      |      |      |      |        |    |
|-------|-----------|-----------|---------------|-----------------|------|------|------|------|--------|----|
| chr12 | 105724272 | 105725052 | C12orf75      | ENSG00000235162 | 248  | 0.27 | 0.3  | 0.65 | -0.032 | NA |
| chr12 | 110318011 | 110318778 | GLTP          | ENSG00000139433 | -264 | 0.33 | 0.3  | 0.65 | 0.026  | NA |
| chr12 | 57623420  | 57623903  | SHMT2         | ENSG00000182199 | -167 | 0.24 | 0.33 | 0.66 | -0.096 | NA |
| chr12 | 6657727   | 6657973   | IFFO1         | ENSG00000010295 | 489  | 0.87 | 0.82 | 0.67 | 0.051  | NA |
| chr12 | 22199062  | 22199589  | CMAS          | ENSG00000111726 | 217  | 0.22 | 0.17 | 0.67 | 0.043  | NA |
| chr12 | 57984776  | 57985302  | PIP4K2C       | ENSG00000166908 | 82   | 0.31 | 0.28 | 0.67 | 0.035  | NA |
| chr12 | 121124111 | 121125479 | MLEC          | ENSG00000110917 | 123  | 0.23 | 0.21 | 0.68 | 0.022  | NA |
| chr12 | 15475318  | 15475901  | PTPRO         | ENSG00000151490 | 278  | 0.18 | 0.14 | 0.69 | 0.039  | NA |
| chr12 | 56435573  | 56436406  | RP11-603J24.4 | ENSG00000257449 | -399 | 0.24 | 0.27 | 0.69 | -0.028 | NA |
| chr12 | 7046237   | 7047257   | ATN1          | ENSG00000111676 | -114 | 0.31 | 0.28 | 0.7  | 0.03   | NA |
| chr12 | 11653232  | 11653775  | PRB2          | ENSG00000121335 | 472  | 0.17 | 0.19 | 0.7  | -0.024 | NA |
| chr12 | 56727661  | 56727996  | PAN2          | ENSG00000135473 | -107 | 0.22 | 0.25 | 0.7  | -0.031 | NA |
| chr12 | 114404002 | 114404377 | RBM19         | ENSG00000122965 | -175 | 0.17 | 0.2  | 0.7  | -0.032 | NA |
| chr12 | 133286760 | 133287992 | PGAM5         | ENSG00000247077 | -29  | 0.21 | 0.22 | 0.7  | -0.013 | NA |
| chr12 | 54069625  | 54070177  | ATP5G2        | ENSG00000135390 | -35  | 0.33 | 0.47 | 0.71 | -0.13  | NA |
| chr12 | 54071053  | 54071265  | ATP5G2        | ENSG00000135390 | 23   | 0.37 | 0.51 | 0.71 | -0.13  | NA |
| chr12 | 103351579 | 103352695 | PAH           | ENSG00000171759 | 7    | 0.24 | 0.26 | 0.71 | -0.017 | NA |
| chr12 | 121837380 | 121838396 | ANAPC5        | ENSG00000089053 | -189 | 0.28 | 0.26 | 0.71 | 0.02   | NA |
| chr12 | 6715500   | 6715829   | CHD4          | ENSG00000111642 | 182  | 0.35 | 0.23 | 0.72 | 0.12   | NA |
| chr12 | 104531174 | 104532539 | NFYB          | ENSG00000120837 | -61  | 0.25 | 0.22 | 0.72 | 0.025  | NA |
| chr12 | 109535264 | 109536431 | UNG           | ENSG00000076248 | 468  | 0.22 | 0.25 | 0.72 | -0.024 | NA |
| chr12 | 123351641 | 123351918 | RP11-463O12.3 | ENSG00000256152 | 1897 | 0.68 | 0.62 | 0.72 | 0.056  | NA |
| chr12 | 10365369  | 10365721  | GABARAPL1     | ENSG00000139112 | 141  | 0.2  | 0.29 | 0.73 | -0.09  | NA |
| chr12 | 22777988  | 22778301  | ETNK1         | ENSG00000139163 | 135  | 0.27 | 0.19 | 0.73 | 0.072  | NA |
| chr12 | 31944806  | 31945230  | H3F3C         | ENSG00000188375 | 157  | 0.83 | 0.92 | 0.73 | -0.083 | NA |
| chr12 | 50349079  | 50349525  | RP11-469H8.8  | ENSG00000257378 | 606  | 0.66 | 0.57 | 0.73 | 0.091  | NA |
| chr12 | 58119909  | 58121551  | RP11-571M6.6  | ENSG00000255737 | 676  | 0.23 | 0.25 | 0.73 | -0.015 | NA |
| chr12 | 68725847  | 68726475  | MDM1          | ENSG00000111554 | -126 | 0.22 | 0.19 | 0.73 | 0.028  | NA |
| chr12 | 118499103 | 118499473 | WSB2          | ENSG00000176871 | -293 | 0.33 | 0.29 | 0.73 | 0.04   | NA |
| chr12 | 122667648 | 122668038 | LRRC43        | ENSG00000158113 | 179  | 0.24 | 0.21 | 0.73 | 0.034  | NA |



|       |           |           |               |                 |       |      |      |      |         |    |
|-------|-----------|-----------|---------------|-----------------|-------|------|------|------|---------|----|
| chr12 | 13154088  | 13154866  | HTR7P1        | ENSG00000183935 | 44    | 0.22 | 0.24 | 0.74 | -0.016  | NA |
| chr12 | 80328326  | 80329302  | PPP1R12A      | ENSG00000058272 | -319  | 0.21 | 0.22 | 0.74 | -0.017  | NA |
| chr12 | 94533729  | 94533952  | RP11-74K11.1  | ENSG00000257360 | -13   | 1    | 0.98 | 0.74 | 0.02    | NA |
| chr12 | 131200509 | 131200726 | RIMBP2        | ENSG00000060709 | 209   | 0.23 | 0.2  | 0.74 | 0.038   | NA |
| chr12 | 25348039  | 25348399  | CASC1         | ENSG00000118307 | -159  | 0.29 | 0.34 | 0.75 | -0.053  | NA |
| chr12 | 75699310  | 75699513  | RP11-560G2.2  | ENSG00000257823 | 179   | 0.98 | 0.96 | 0.75 | 0.022   | NA |
| chr12 | 112563184 | 112563788 | TRAFD1        | ENSG00000135148 | 181   | 0.22 | 0.2  | 0.75 | 0.023   | NA |
| chr12 | 33049301  | 33050098  | PKP2          | ENSG00000057294 | -164  | 0.23 | 0.22 | 0.76 | 0.014   | NA |
| chr12 | 48206721  | 48207126  | HDAC7         | ENSG00000061273 | -89   | 0.36 | 0.39 | 0.76 | -0.028  | NA |
| chr12 | 58165563  | 58165962  | METTL1        | ENSG00000037897 | 97    | 0.26 | 0.21 | 0.76 | 0.045   | NA |
| chr12 | 6875481   | 6876923   | PTMS          | ENSG00000159335 | 661   | 0.24 | 0.23 | 0.77 | 0.012   | NA |
| chr12 | 56617995  | 56618374  | OBFC2B        | ENSG00000139579 | 75    | 0.28 | 0.25 | 0.77 | 0.033   | NA |
| chr12 | 72148477  | 72149340  | RAB21         | ENSG00000080371 | 254   | 0.26 | 0.24 | 0.77 | 0.023   | NA |
| chr12 | 105629690 | 105630099 | APPL2         | ENSG00000136044 | -33   | 0.26 | 0.23 | 0.77 | 0.03    | NA |
| chr12 | 53440579  | 53440840  | RP11-983P16.4 | ENSG00000257337 | 34    | 0.27 | 0.31 | 0.78 | -0.038  | NA |
| chr12 | 70132340  | 70133559  | RP11-588G21.2 | ENSG00000247131 | -607  | 0.17 | 0.18 | 0.78 | -0.0096 | NA |
| chr12 | 75784799  | 75785241  | GLIPR1L2      | ENSG00000180481 | 170   | 0.21 | 0.18 | 0.78 | 0.035   | NA |
| chr12 | 93771465  | 93772289  | RP11-486A14.2 | ENSG00000257252 | -393  | 0.27 | 0.25 | 0.78 | 0.02    | NA |
| chr12 | 112279692 | 112280714 | C12orf47      | ENSG00000234608 | -497  | 0.3  | 0.36 | 0.78 | -0.064  | NA |
| chr12 | 122984995 | 122985644 | ZCCHC8        | ENSG00000033030 | -252  | 0.17 | 0.19 | 0.78 | -0.016  | NA |
| chr12 | 133148706 | 133149021 | FBRSL1        | ENSG00000112787 | -250  | 0.87 | 0.9  | 0.78 | -0.032  | NA |
| chr12 | 49485766  | 49485977  | RP11-386G11.8 | ENSG00000257346 | -120  | 0.33 | 0.31 | 0.79 | 0.025   | NA |
| chr12 | 51566680  | 51567072  | TFCP2         | ENSG00000135457 | -181  | 0.21 | 0.23 | 0.79 | -0.026  | NA |
| chr12 | 54393374  | 54394648  | AC012531.17   | ENSG00000250451 | -607  | 0.23 | 0.21 | 0.79 | 0.017   | NA |
| chr12 | 67462670  | 67463724  | RP11-123O10.4 | ENSG00000256248 | -255  | 0.23 | 0.22 | 0.79 | 0.013   | NA |
| chr12 | 69201622  | 69202663  | MDM2          | ENSG00000135679 | 186   | 0.42 | 0.38 | 0.79 | 0.031   | NA |
| chr12 | 98850690  | 98851002  | AC013418.1    | ENSG00000227825 | 77    | 0.21 | 0.22 | 0.79 | -0.018  | NA |
| chr12 | 103350089 | 103350422 | ASCL1         | ENSG00000139352 | -1209 | 0.17 | 0.29 | 0.79 | -0.11   | NA |
| chr12 | 131977468 | 131977843 | RP11-897M7.1  | ENSG00000256209 | -159  | 1    | 0.8  | 0.79 | 0.2     | NA |
| chr12 | 9102150   | 9102803   | M6PR          | ENSG00000003056 | -270  | 0.17 | 0.19 | 0.8  | -0.015  | NA |

|       |           |           |                |                 |      |      |      |      |         |    |
|-------|-----------|-----------|----------------|-----------------|------|------|------|------|---------|----|
| chr12 | 123450868 | 123451207 | ABCB9          | ENSG00000150967 | -88  | 0.28 | 0.43 | 0.8  | -0.15   | NA |
| chr12 | 129307947 | 129308724 | SLC15A4        | ENSG00000139370 | -268 | 0.23 | 0.25 | 0.8  | -0.018  | NA |
| chr12 | 49176427  | 49177154  | ADCY6          | ENSG00000174233 | 1087 | 0.87 | 0.89 | 0.81 | -0.021  | NA |
| chr12 | 49484920  | 49485178  | RP11-386G11.8  | ENSG00000257346 | -942 | 0.96 | 1    | 0.81 | -0.044  | NA |
| chr12 | 132195034 | 132196454 | SFSWAP         | ENSG00000061936 | 118  | 0.23 | 0.24 | 0.81 | -0.011  | NA |
| chr12 | 1639033   | 1640750   | WNT5B          | ENSG00000111186 | 834  | 0.2  | 0.2  | 0.82 | 0.0059  | NA |
| chr12 | 6643261   | 6644607   | GAPDH          | ENSG00000111640 | 256  | 0.22 | 0.22 | 0.83 | -0.0073 | NA |
| chr12 | 32908374  | 32908981  | YARS2          | ENSG00000139131 | 53   | 0.2  | 0.27 | 0.83 | -0.066  | NA |
| chr12 | 53738546  | 53738986  | SP7            | ENSG00000170374 | 333  | 0.22 | 0.21 | 0.83 | 0.015   | NA |
| chr12 | 102091044 | 102092366 | CHPT1          | ENSG00000111666 | 300  | 0.25 | 0.24 | 0.83 | 0.014   | NA |
| chr12 | 175666    | 176400    | IQSEC3         | ENSG00000120645 | 102  | 0.2  | 0.17 | 0.84 | 0.024   | NA |
| chr12 | 49782965  | 49783193  | RP11-161H23.10 | ENSG00000257954 | -220 | 0.81 | 0.74 | 0.84 | 0.071   | NA |
| chr12 | 69633272  | 69634095  | CPSF6          | ENSG00000111605 | 366  | 0.21 | 0.19 | 0.84 | 0.023   | NA |
| chr12 | 54447744  | 54448091  | HOXC4          | ENSG00000198353 | 256  | 0.2  | 0.22 | 0.85 | -0.023  | NA |
| chr12 | 133195922 | 133196556 | P2RX2          | ENSG00000187848 | 254  | 0.25 | 0.43 | 0.85 | -0.18   | NA |
| chr12 | 6937570   | 6938639   | LEPREL2        | ENSG00000110811 | 532  | 0.2  | 0.19 | 0.86 | 0.0093  | NA |
| chr12 | 12939713  | 12940391  | APOLD1         | ENSG00000178878 | 1511 | 0.17 | 0.17 | 0.86 | 0.0064  | NA |
| chr12 | 56546192  | 56546411  | MYL6B          | ENSG00000196465 | 78   | 0.14 | 0.18 | 0.86 | -0.031  | NA |
| chr12 | 121905463 | 121905956 | KDM2B          | ENSG00000089094 | -606 | 0.24 | 0.25 | 0.86 | -0.015  | NA |
| chr12 | 107380558 | 107381076 | MTERFD3        | ENSG00000120832 | 51   | 0.14 | 0.25 | 0.87 | -0.11   | NA |
| chr12 | 9800543   | 9800852   | RP11-705C15.4  | ENSG00000256442 | -92  | 0.21 | 0.24 | 0.88 | -0.039  | NA |
| chr12 | 27396982  | 27397646  | STK38L         | ENSG00000211455 | 206  | 0.24 | 0.22 | 0.88 | 0.018   | NA |
| chr12 | 113494389 | 113495534 | DTX1           | ENSG00000135144 | 447  | 0.22 | 0.21 | 0.88 | 0.009   | NA |
| chr12 | 56497868  | 56499047  | PA2G4          | ENSG00000170515 | 354  | 0.25 | 0.26 | 0.89 | -0.0098 | NA |
| chr12 | 20094137  | 20094358  | RP11-405A12.1  | ENSG00000256849 | -208 | 0.97 | 0.96 | 0.9  | 0.015   | NA |
| chr12 | 53835295  | 53835568  | PRR13          | ENSG00000205352 | 42   | 0.42 | 0.3  | 0.9  | 0.12    | NA |
| chr12 | 121882191 | 121882416 | KDM2B          | ENSG00000089094 | 842  | 0.78 | 0.82 | 0.9  | -0.046  | NA |
| chr12 | 129429603 | 129429843 | RP11-753B7.2   | ENSG00000255838 | 25   | 1    | 0.99 | 0.9  | 0.011   | NA |
| chr12 | 131649194 | 131649608 | RP11-638F5.1   | ENSG00000204603 | -155 | 0.95 | 0.97 | 0.9  | -0.019  | NA |
| chr12 | 132603367 | 132603646 | EP400NL        | ENSG00000185684 | 815  | 0.91 | 0.89 | 0.9  | 0.023   | NA |

|       |           |           |               |                 |      |      |      |      |         |    |
|-------|-----------|-----------|---------------|-----------------|------|------|------|------|---------|----|
| chr12 | 6579555   | 6580429   | VAMP1         | ENSG00000139190 | -212 | 0.2  | 0.21 | 0.91 | -0.012  | NA |
| chr12 | 32552025  | 32553038  | FGD4          | ENSG00000139132 | 68   | 0.23 | 0.22 | 0.91 | 0.0089  | NA |
| chr12 | 53693441  | 53694028  | C12orf10      | ENSG00000139637 | 264  | 0.3  | 0.28 | 0.91 | 0.014   | NA |
| chr12 | 57635240  | 57635572  | NDUFA4L2      | ENSG00000185633 | -931 | 0.21 | 0.18 | 0.91 | 0.029   | NA |
| chr12 | 109251205 | 109251586 | SSH1          | ENSG00000084112 | -106 | 0.25 | 0.17 | 0.91 | 0.08    | NA |
| chr12 | 31405184  | 31405545  | RP11-627K11.1 | ENSG00000243517 | 167  | 0.97 | 0.95 | 0.92 | 0.017   | NA |
| chr12 | 48397889  | 48398731  | COL2A1        | ENSG00000139219 | -206 | 0.19 | 0.17 | 0.92 | 0.011   | NA |
| chr12 | 49350839  | 49351387  | ARF3          | ENSG00000134287 | -261 | 0.21 | 0.22 | 0.92 | -0.012  | NA |
| chr12 | 58145853  | 58146360  | CDK4          | ENSG00000135446 | -208 | 0.21 | 0.22 | 0.92 | -0.011  | NA |
| chr12 | 109746826 | 109748378 | FOXN4         | ENSG00000139445 | -577 | 0.21 | 0.2  | 0.92 | 0.0093  | NA |
| chr12 | 8234689   | 8235020   | NECAP1        | ENSG00000089818 | 47   | 0.17 | 0.11 | 0.93 | 0.055   | NA |
| chr12 | 14927291  | 14928023  | H2AFJ         | ENSG00000246705 | 304  | 0.2  | 0.19 | 0.93 | 0.0082  | NA |
| chr12 | 48499463  | 48500232  | SENP1         | ENSG00000079387 | -256 | 0.22 | 0.2  | 0.93 | 0.023   | NA |
| chr12 | 119212110 | 119212393 | RP11-357K6.1  | ENSG00000255618 | 691  | 0.14 | 0.33 | 0.93 | -0.2    | NA |
| chr12 | 32112161  | 32112833  | C12orf35      | ENSG00000174718 | 193  | 0.22 | 0.21 | 0.94 | 0.011   | NA |
| chr12 | 49716630  | 49717018  | TROAP         | ENSG00000135451 | -195 | 0.23 | 0.23 | 0.94 | -0.0079 | NA |
| chr12 | 49961630  | 49962219  | MCRS1         | ENSG00000187778 | -291 | 0.42 | 0.4  | 0.94 | 0.017   | NA |
| chr12 | 118814014 | 118814839 | SUDS3         | ENSG00000111707 | 241  | 0.18 | 0.19 | 0.94 | -0.0095 | NA |
| chr12 | 133179886 | 133180351 | RP13-554M15.6 | ENSG00000204583 | 1001 | 0.67 | 0.68 | 0.94 | -0.012  | NA |
| chr12 | 75601081  | 75601752  | KCNC2         | ENSG00000166006 | 368  | 0.28 | 0.27 | 0.95 | 0.0066  | NA |
| chr12 | 100593253 | 100593814 | RP11-175P13.3 | ENSG00000257489 | 7    | 0.21 | 0.23 | 0.95 | -0.022  | NA |
| chr12 | 120884047 | 120884703 | TRIAP1        | ENSG00000170855 | -202 | 0.27 | 0.29 | 0.95 | -0.017  | NA |
| chr12 | 123755246 | 123756408 | CDK2AP1       | ENSG00000111328 | -139 | 0.18 | 0.19 | 0.95 | -0.004  | NA |
| chr12 | 32832130  | 32832978  | DNM1L         | ENSG00000087470 | 420  | 0.24 | 0.24 | 0.96 | 0.0087  | NA |
| chr12 | 52444553  | 524445421 | NR4A1         | ENSG00000123358 | -204 | 0.24 | 0.25 | 0.96 | -0.0067 | NA |
| chr12 | 52760834  | 52761099  | KRT85         | ENSG00000135443 | 299  | 1    | 0.94 | 0.96 | 0.055   | NA |
| chr12 | 57869075  | 57870182  | ARHGAP9       | ENSG00000123329 | -482 | 0.2  | 0.19 | 0.97 | 0.0079  | NA |
| chr12 | 110010994 | 110011599 | MVK           | ENSG00000110921 | 236  | 0.21 | 0.17 | 0.97 | 0.041   | NA |
| chr12 | 122516193 | 122517207 | MLXIP         | ENSG00000175727 | 72   | 0.23 | 0.23 | 0.97 | 0.0051  | NA |
| chr12 | 122687800 | 122689106 | B3GNT4        | ENSG00000176383 | 363  | 0.21 | 0.2  | 0.97 | 0.0032  | NA |

|       |           |           |               |                 |      |      |      |      |          |    |
|-------|-----------|-----------|---------------|-----------------|------|------|------|------|----------|----|
| chr12 | 125473414 | 125473824 | DHX37         | ENSG00000150990 | 48   | 0.21 | 0.21 | 0.97 | -0.0093  | NA |
| chr12 | 46661054  | 46663408  | SLC38A1       | ENSG00000111371 | -747 | 0.23 | 0.23 | 0.98 | -0.0025  | NA |
| chr12 | 94071293  | 94071655  | CRADD         | ENSG00000169372 | -19  | 0.22 | 0.27 | 0.98 | -0.05    | NA |
| chr12 | 132285972 | 132286527 | 5S_rRNA       | ENSG00000200516 | -270 | 0.95 | 0.97 | 0.98 | -0.015   | NA |
| chr12 | 57631932  | 57634578  | NDUFA4L2      | ENSG00000185633 | 1220 | 0.25 | 0.25 | 0.99 | 0.002    | NA |
| chr12 | 105379976 | 105380445 | C12orf45      | ENSG00000151131 | 122  | 0.2  | 0.21 | 0.99 | -0.0094  | NA |
| chr12 | 111180006 | 111181028 | PPP1CC        | ENSG00000186298 | 127  | 0.24 | 0.25 | 0.99 | -0.0068  | NA |
| chr12 | 121975028 | 121976140 | KDM2B         | ENSG00000089094 | -63  | 0.17 | 0.16 | 0.99 | 0.0042   | NA |
| chr12 | 125002880 | 125003101 | NCOR2         | ENSG00000196498 | -150 | 0.23 | 0.26 | 0.99 | -0.029   | NA |
| chr12 | 498098    | 498920    | KDM5A         | ENSG00000073614 | -79  | 0.23 | 0.23 | 1    | 2.00E-04 | NA |
| chr12 | 2113343   | 2113881   | DCP1B         | ENSG00000151065 | -19  | 0.18 | 0.17 | 1    | 0.0093   | NA |
| chr12 | 2999665   | 3000638   | TULP3         | ENSG00000078246 | 118  | 0.21 | 0.21 | 1    | 0.0057   | NA |
| chr12 | 4433733   | 4433984   | C12orf5       | ENSG00000078237 | 49   | 1    | 1    | 1    | 0        | NA |
| chr12 | 6602360   | 6602586   | MRPL51        | ENSG00000111639 | -12  | 0.17 | 0.25 | 1    | -0.077   | NA |
| chr12 | 6857973   | 6858257   | MLF2          | ENSG00000089693 | 1369 | 0.91 | 0.93 | 1    | -0.024   | NA |
| chr12 | 7342541   | 7342798   | PEX5          | ENSG00000139197 | 117  | 0.35 | 0.33 | 1    | 0.022    | NA |
| chr12 | 7781003   | 7781248   | AC006927.4    | ENSG00000244726 | -755 | 1    | 1    | 1    | 0        | NA |
| chr12 | 8395051   | 8396713   | RP11-266K4.8  | ENSG00000164845 | -338 | 0.32 | 0.31 | 1    | 0.0038   | NA |
| chr12 | 8757750   | 8758079   | AICDA         | ENSG00000111732 | 1698 | 1    | 0.98 | 1    | 0.023    | NA |
| chr12 | 9392459   | 9392686   | RP11-118B22.2 | ENSG00000237248 | -27  | 0.8  | 0.78 | 1    | 0.019    | NA |
| chr12 | 11323771  | 11324331  | RP11-785H5.2  | ENSG00000256712 | -99  | 0.25 | 0.25 | 1    | -0.003   | NA |
| chr12 | 12764751  | 12765205  | CREBL2        | ENSG00000111269 | 217  | 0.6  | 0.6  | 1    | #####    | NA |
| chr12 | 20704525  | 20706004  | RP11-424C20.2 | ENSG00000256663 | 740  | 0.98 | 0.99 | 1    | -0.0026  | NA |
| chr12 | 21590469  | 21590785  | PYROXD1       | ENSG00000121350 | 78   | 0.19 | 0.21 | 1    | -0.02    | NA |
| chr12 | 34319681  | 34319984  | RP11-313F23.1 | ENSG00000250788 | 57   | 0.89 | 0.88 | 1    | 0.013    | NA |
| chr12 | 39300469  | 39300680  | RP11-396F22.1 | ENSG00000257718 | 321  | 0.18 | 0.2  | 1    | -0.018   | NA |
| chr12 | 42680607  | 42680889  | RP11-76E16.2  | ENSG00000257674 | 35   | 0.94 | 0.95 | 1    | -0.0088  | NA |
| chr12 | 47224912  | 47225664  | SLC38A4       | ENSG00000139209 | 903  | 0.25 | 0.25 | 1    | -0.0035  | NA |
| chr12 | 49182421  | 49182658  | ADCY6         | ENSG00000174233 | 281  | 0.2  | 0.24 | 1    | -0.035   | NA |
| chr12 | 49393139  | 49393361  | DDN           | ENSG00000181418 | -158 | 0.21 | 0.2  | 1    | 0.01     | NA |

|       |           |           |               |                 |       |      |      |   |         |    |
|-------|-----------|-----------|---------------|-----------------|-------|------|------|---|---------|----|
| chr12 | 49420031  | 49420292  | MLL2          | ENSG00000167548 | -1754 | 0.91 | 1    | 1 | -0.087  | NA |
| chr12 | 49483601  | 49484255  | RP11-386G11.8 | ENSG00000257346 | -63   | 0.21 | 0.21 | 1 | 0.00085 | NA |
| chr12 | 49504035  | 49504642  | LMBR1L        | ENSG00000139636 | 112   | 0.3  | 0.31 | 1 | -0.0039 | NA |
| chr12 | 50474869  | 50475445  | ACCN2         | ENSG00000110881 | 1324  | 0.58 | 0.59 | 1 | -0.012  | NA |
| chr12 | 50794549  | 50794920  | LARP4         | ENSG00000161813 | 142   | 0.22 | 0.23 | 1 | -0.0095 | NA |
| chr12 | 52294173  | 52294632  | RP11-1100L3.4 | ENSG00000258021 | 53    | 1    | 0.98 | 1 | 0.016   | NA |
| chr12 | 53297442  | 53297824  | KRT8          | ENSG00000170421 | -201  | 0.37 | 0.37 | 1 | -0.0009 | NA |
| chr12 | 53774336  | 53774603  | SP1           | ENSG00000185591 | 46    | 0.12 | 0.12 | 1 | 0.0049  | NA |
| chr12 | 56522943  | 56523285  | RP11-603J24.5 | ENSG00000258317 | 289   | 0.3  | 0.28 | 1 | 0.021   | NA |
| chr12 | 56753861  | 56754323  | STAT2         | ENSG00000170581 | -182  | 0.23 | 0.24 | 1 | -0.0098 | NA |
| chr12 | 57609976  | 57611168  | NXPH4         | ENSG00000182379 | -6    | 0.21 | 0.21 | 1 | -0.0009 | NA |
| chr12 | 57824155  | 57824395  | R3HDM2        | ENSG00000179912 | 298   | 0.27 | 0.3  | 1 | -0.026  | NA |
| chr12 | 58004982  | 58005351  | ARHGEF25      | ENSG00000240771 | -52   | 0.39 | 0.39 | 1 | -0.0051 | NA |
| chr12 | 62860383  | 62860855  | MON2          | ENSG00000061987 | 22    | 0.22 | 0.23 | 1 | -0.0065 | NA |
| chr12 | 67663041  | 67664047  | CAND1         | ENSG00000111530 | 483   | 0.22 | 0.18 | 1 | 0.035   | NA |
| chr12 | 69327021  | 69327532  | CPM           | ENSG00000135678 | -294  | 0.28 | 0.27 | 1 | 0.015   | NA |
| chr12 | 74564752  | 74565178  | RP11-274M17.1 | ENSG00000258320 | 740   | 0.96 | 0.95 | 1 | 0.012   | NA |
| chr12 | 75602991  | 75603344  | KCNC2         | ENSG00000166006 | 48    | 0.26 | 0.24 | 1 | 0.023   | NA |
| chr12 | 75723829  | 75724206  | CAPS2         | ENSG00000180881 | -181  | 0.34 | 0.33 | 1 | 0.0064  | NA |
| chr12 | 76424634  | 76426316  | PHLDA1        | ENSG00000139289 | 19    | 0.21 | 0.21 | 1 | 0.0027  | NA |
| chr12 | 79198064  | 79198400  | RP11-123M21.1 | ENSG00000257948 | 104   | 0.98 | 0.98 | 1 | 0.0015  | NA |
| chr12 | 82152320  | 82152674  | PPFIA2        | ENSG00000139220 | -71   | 0.35 | 0.33 | 1 | 0.02    | NA |
| chr12 | 85306282  | 85306829  | SLC6A15       | ENSG00000072041 | 17    | 0.24 | 0.24 | 1 | -0.0014 | NA |
| chr12 | 91347804  | 91348096  | C12orf12      | ENSG00000197651 | -477  | 0.99 | 1    | 1 | -0.013  | NA |
| chr12 | 96252555  | 96253029  | RP11-536G4.2  | ENSG00000258343 | -216  | 1    | 1    | 1 | 0       | NA |
| chr12 | 96640797  | 96641167  | ELK3          | ENSG00000111145 | 73    | 0.98 | 1    | 1 | -0.02   | NA |
| chr12 | 98987193  | 98988203  | SLC25A3       | ENSG00000075415 | 329   | 0.21 | 0.19 | 1 | 0.02    | NA |
| chr12 | 102132753 | 102133415 | SYCP3         | ENSG00000139351 | 107   | 0.99 | 0.99 | 1 | 0.0034  | NA |
| chr12 | 104350503 | 104351069 | C12orf73      | ENSG00000204954 | -270  | 1    | 1    | 1 | 0       | NA |
| chr12 | 104659057 | 104659583 | RPL18AP3      | ENSG00000213442 | 233   | 1    | 1    | 1 | 0       | NA |

|       |           |           |               |                 |       |      |      |    |         |    |
|-------|-----------|-----------|---------------|-----------------|-------|------|------|----|---------|----|
| chr12 | 104680737 | 104681096 | TXNRD1        | ENSG00000198431 | 148   | 0.3  | 0.25 | 1  | 0.05    | NA |
| chr12 | 106979429 | 106981086 | RFX4          | ENSG00000111783 | 752   | 0.24 | 0.24 | 1  | 0.0026  | NA |
| chr12 | 108954495 | 108955023 | SART3         | ENSG00000075856 | 176   | 0.18 | 0.2  | 1  | -0.021  | NA |
| chr12 | 111471061 | 111471578 | CUX2          | ENSG00000111249 | -509  | 0.26 | 0.29 | 1  | -0.029  | NA |
| chr12 | 112204498 | 112204979 | ALDH2         | ENSG00000111275 | 47    | 0.17 | 0.17 | 1  | -0.0017 | NA |
| chr12 | 112846955 | 112847200 | RPL6          | ENSG00000089009 | 38    | 0.23 | 0.23 | 1  | 0.0061  | NA |
| chr12 | 113592203 | 113592620 | CCDC42B       | ENSG00000186710 | 1376  | 0.2  | 0.2  | 1  | -0.0029 | NA |
| chr12 | 113622761 | 113623931 | DDX54         | ENSG00000123064 | -101  | 0.29 | 0.29 | 1  | 0.0012  | NA |
| chr12 | 113659038 | 113659657 | TPCN1         | ENSG00000186815 | 113   | 1    | 0.86 | 1  | 0.14    | NA |
| chr12 | 117484305 | 117484627 | TESC          | ENSG00000088992 | 170   | 0.94 | 0.95 | 1  | -0.011  | NA |
| chr12 | 120651711 | 120651943 | PXN           | ENSG00000089159 | 1982  | 0.97 | 0.97 | 1  | 0.0054  | NA |
| chr12 | 120933649 | 120934713 | RP11-18C24.6  | ENSG00000248008 | -438  | 0.25 | 0.25 | 1  | -0.0011 | NA |
| chr12 | 121163472 | 121163913 | ACADS         | ENSG00000122971 | 154   | 0.19 | 0.19 | 1  | 0.0071  | NA |
| chr12 | 121341414 | 121342436 | AC069214.1    | ENSG00000157837 | 249   | 0.18 | 0.18 | 1  | 0.0031  | NA |
| chr12 | 123011261 | 123011765 | RSRC2         | ENSG00000111011 | -30   | 0.26 | 0.25 | 1  | 0.003   | NA |
| chr12 | 123754049 | 123754373 | CDK2AP1       | ENSG00000111328 | -425  | 0.19 | 0.2  | 1  | -0.014  | NA |
| chr12 | 124780105 | 124780306 | FAM101A       | ENSG00000178882 | 136   | 0.33 | 0.36 | 1  | -0.024  | NA |
| chr12 | 125003217 | 125003482 | NCOR2         | ENSG00000196498 | -509  | 0.12 | 0.15 | 1  | -0.02   | NA |
| chr12 | 125599306 | 125599625 | AACS          | ENSG00000081760 | 498   | 1    | 0.97 | 1  | 0.026   | NA |
| chr12 | 130184541 | 130184852 | RP11-174M13.2 | ENSG00000256137 | -1924 | 0.97 | 0.96 | 1  | 0.0056  | NA |
| chr12 | 131389263 | 131389783 | Y_RNA         | ENSG00000206850 | -1860 | 1    | 0.92 | 1  | 0.077   | NA |
| chr12 | 132284454 | 132284685 | 5S_rRNA       | ENSG00000200516 | 1410  | 0.3  | 0.3  | 1  | -0.0022 | NA |
| chr12 | 132601226 | 132601984 | EP400NL       | ENSG00000185684 | -1086 | 0.93 | 0.93 | 1  | 0.0017  | NA |
| chr12 | 132633217 | 132635301 | NOC4L         | ENSG00000184967 | -1127 | 0.96 | 0.98 | 1  | -0.016  | NA |
| chr12 | 132855170 | 132855382 | RP13-895J2.3  | ENSG00000256542 | 1341  | 0.5  | 0.5  | 1  | 0       | NA |
| chr12 | 133296223 | 133296495 | PGAM5         | ENSG00000247077 | 1807  | 1    | 1    | 1  | 0       | NA |
| chr12 | 133404789 | 133405985 | GOLGA3        | ENSG00000090615 | -99   | 0.3  | 0.3  | 1  | -0.0013 | NA |
| chr12 | 4647844   | 4648053   | RAD51AP1      | ENSG00000111247 | -2    | 0.44 | NA   | NA | NA      | NA |
| chr12 | 9436217   | 9436654   | RP11-22B23.1  | ENSG00000111788 | 190   | 0.26 | NA   | NA | NA      | NA |
| chr12 | 14518525  | 14518975  | ATF7IP        | ENSG00000171681 | 140   | NA   | 0.17 | NA | NA      | NA |

|       |           |           |               |                 |       |      |      |          |      |    |
|-------|-----------|-----------|---------------|-----------------|-------|------|------|----------|------|----|
| chr12 | 21810488  | 21810766  | LDHB          | ENSG00000111716 | 101   | 0.36 | NA   | NA       | NA   | NA |
| chr12 | 29534090  | 29534308  | ERGIC2        | ENSG00000087502 | -105  | 0.25 | NA   | NA       | NA   | NA |
| chr12 | 31881630  | 31882461  | AMN1          | ENSG00000151743 | -101  | 0.43 | NA   | NA       | NA   | NA |
| chr12 | 46385607  | 46385887  | SCAF11        | ENSG00000139218 | 156   | NA   | 0.22 | NA       | NA   | NA |
| chr12 | 52309034  | 52309337  | ACVRL1        | ENSG00000139567 | -47   | 0.93 | NA   | NA       | NA   | NA |
| chr12 | 52639195  | 52639416  | KRT7          | ENSG00000135480 | 82    | 0.33 | NA   | NA       | NA   | NA |
| chr12 | 52684945  | 52685222  | KRT81         | ENSG00000205426 | 216   | 0.83 | NA   | NA       | NA   | NA |
| chr12 | 52695727  | 52696004  | KRT86         | ENSG00000170442 | 216   | NA   | 1    | NA       | NA   | NA |
| chr12 | 53491572  | 53491955  | IGFBP6        | ENSG00000167779 | 312   | 0.21 | NA   | NA       | NA   | NA |
| chr12 | 54811981  | 54812202  | ITGA5         | ENSG00000161638 | 820   | 0.33 | NA   | NA       | NA   | NA |
| chr12 | 56660442  | 56661131  | COQ10A        | ENSG00000135469 | 144   | 0.17 | NA   | NA       | NA   | NA |
| chr12 | 57853715  | 57853973  | GLI1          | ENSG00000111087 | -74   | 0.4  | NA   | NA       | NA   | NA |
| chr12 | 58132478  | 58132734  | AGAP2         | ENSG00000135439 | -577  | NA   | 0.17 | NA       | NA   | NA |
| chr12 | 88429105  | 88429606  | C12orf29      | ENSG00000133641 | 132   | 0.15 | NA   | NA       | NA   | NA |
| chr12 | 95397382  | 95397611  | NDUFA12       | ENSG00000184752 | -112  | NA   | 0.19 | NA       | NA   | NA |
| chr12 | 100378243 | 100378582 | ANKS1B        | ENSG00000185046 | 20    | 0.33 | NA   | NA       | NA   | NA |
| chr12 | 108297426 | 108297743 | RP11-554D14.2 | ENSG00000258072 | 141   | NA   | 0.28 | NA       | NA   | NA |
| chr12 | 108956188 | 108956759 | ISCU          | ENSG00000136003 | 115   | NA   | 0.14 | NA       | NA   | NA |
| chr12 | 109548899 | 109549174 | RP11-443D10.3 | ENSG00000256139 | 13    | 0.25 | NA   | NA       | NA   | NA |
| chr12 | 113376185 | 113376493 | OAS3          | ENSG00000111331 | 90    | NA   | 0.21 | NA       | NA   | NA |
| chr12 | 121789970 | 121790274 | ANAPC5        | ENSG00000089053 | -15   | 0.27 | NA   | NA       | NA   | NA |
| chr12 | 123942639 | 123943001 | SNRNP35       | ENSG00000184209 | 154   | 0.22 | NA   | NA       | NA   | NA |
| chr12 | 131606751 | 131606999 | GPR133        | ENSG00000111452 | 376   | 0.95 | NA   | NA       | NA   | NA |
| chr12 | 132690339 | 132690571 | GALNT9        | ENSG00000182870 | -108  | 0.23 | NA   | NA       | NA   | NA |
| chr12 | 132853943 | 132854190 | RP13-895J2.3  | ENSG00000256542 | 131   | 0.52 | NA   | NA       | NA   | NA |
| chr13 | 52769556  | 52769878  | THSD1P1       | ENSG00000217576 | -1117 | 0.65 | 0.18 | 1.30E-09 | 0.47 | NA |
| chr13 | 100620241 | 100624348 | ZIC5          | ENSG00000139800 | 678   | 0.38 | 0.22 | 4.70E-09 | 0.17 | NA |
| chr13 | 103450877 | 103453216 | KDELC1        | ENSG00000134901 | -782  | 0.39 | 0.21 | 9.30E-09 | 0.18 | NA |
| chr13 | 44453207  | 44454295  | C13orf31      | ENSG00000179630 | 331   | 0.43 | 0.18 | 1.40E-08 | 0.25 | NA |
| chr13 | 28494001  | 28496099  | PDX1          | ENSG00000139515 | 893   | 0.33 | 0.16 | 2.50E-08 | 0.18 | NA |

|       |           |           |               |                 |      |      |      |          |       |    |
|-------|-----------|-----------|---------------|-----------------|------|------|------|----------|-------|----|
| chr13 | 31735109  | 31736670  | HSPH1         | ENSG00000120694 | 143  | 0.29 | 0.12 | 2.70E-08 | 0.17  | NA |
| chr13 | 111566486 | 111568366 | ANKRD10       | ENSG00000088448 | -462 | 0.36 | 0.18 | 4.10E-08 | 0.18  | NA |
| chr13 | 113633843 | 113634065 | MCF2L         | ENSG00000126217 | 299  | 0.97 | 0.39 | 1.60E-07 | 0.58  | NA |
| chr13 | 113951096 | 113951990 | LAMP1         | ENSG00000185896 | -13  | 0.36 | 0.14 | 3.50E-07 | 0.21  | NA |
| chr13 | 25254393  | 25255093  | ATP12A        | ENSG00000075673 | 194  | 0.4  | 0.16 | 5.30E-07 | 0.24  | NA |
| chr13 | 100258708 | 100259220 | CLYBL         | ENSG00000125246 | 45   | 0.53 | 0.13 | 6.10E-07 | 0.4   | NA |
| chr13 | 20436776  | 20439089  | ZMYM5         | ENSG00000132950 | -284 | 0.27 | 0.15 | 1.10E-06 | 0.13  | NA |
| chr13 | 101326329 | 101327723 | TMTC4         | ENSG00000125247 | 2    | 0.37 | 0.17 | 1.40E-06 | 0.21  | NA |
| chr13 | 36052553  | 36053119  | NBEA          | ENSG00000172915 | 1950 | 0.29 | 0.13 | 2.20E-06 | 0.16  | NA |
| chr13 | 80914013  | 80915574  | SPRY2         | ENSG00000136158 | -550 | 0.33 | 0.13 | 2.30E-06 | 0.2   | NA |
| chr13 | 21634519  | 21635907  | LATS2         | ENSG00000150457 | 473  | 0.36 | 0.21 | 3.10E-06 | 0.15  | NA |
| chr13 | 53774264  | 53776345  | PCDH8P1       | ENSG00000225510 | 1188 | 0.66 | 0.52 | 3.10E-06 | 0.15  | NA |
| chr13 | 28542221  | 28543544  | CDX2          | ENSG00000165556 | 623  | 0.32 | 0.18 | 4.00E-06 | 0.14  | NA |
| chr13 | 28540356  | 28541279  | CDX2          | ENSG00000165556 | 645  | 0.43 | 0.22 | 4.10E-06 | 0.2   | NA |
| chr13 | 41767827  | 41768762  | KBTBD7        | ENSG00000120696 | 313  | 0.74 | 0.29 | 5.10E-06 | 0.45  | NA |
| chr13 | 53024155  | 53024938  | VPS36         | ENSG00000136100 | -167 | 0.4  | 0.16 | 9.20E-06 | 0.24  | NA |
| chr13 | 32420630  | 32421274  | EEF1DP3       | ENSG00000229715 | -26  | 0.31 | 0.15 | 9.30E-06 | 0.16  | NA |
| chr13 | 33161192  | 33161835  | PDS5B         | ENSG00000083642 | 807  | 0.34 | 0.14 | 1.20E-05 | 0.21  | NA |
| chr13 | 20531548  | 20533630  | ZMYM2         | ENSG00000121741 | -221 | 0.3  | 0.17 | 1.30E-05 | 0.12  | NA |
| chr13 | 19918585  | 19919221  | ANKRD26P3     | ENSG00000237636 | 62   | 0.43 | 0.2  | 3.10E-05 | 0.24  | NA |
| chr13 | 76209540  | 76211213  | LMO7          | ENSG00000136153 | 430  | 0.35 | 0.21 | 3.50E-05 | 0.14  | NA |
| chr13 | 21277233  | 21278446  | IL17D         | ENSG00000172458 | 357  | 0.26 | 0.14 | 3.80E-05 | 0.12  | NA |
| chr13 | 95363152  | 95366051  | SOX21         | ENSG00000125285 | -212 | 0.25 | 0.16 | 4.20E-05 | 0.092 | NA |
| chr13 | 21893156  | 21893605  | GRK6P1        | ENSG00000215571 | 149  | 0.93 | 0.76 | 4.90E-05 | 0.17  | NA |
| chr13 | 114897358 | 114898516 | RASA3         | ENSG00000185989 | 90   | 0.31 | 0.17 | 5.20E-05 | 0.14  | NA |
| chr13 | 36705040  | 36705707  | DCLK1         | ENSG00000133083 | 70   | 0.42 | 0.17 | 5.60E-05 | 0.25  | NA |
| chr13 | 28674227  | 28675170  | FLT3          | ENSG00000122025 | 9    | 0.32 | 0.16 | 6.40E-05 | 0.16  | NA |
| chr13 | 111935411 | 111935682 | ARHGEF7       | ENSG00000102606 | 371  | 1    | 0.45 | 9.00E-05 | 0.55  | NA |
| chr13 | 29292670  | 29293329  | SLC46A3       | ENSG00000139508 | -21  | 0.27 | 0.12 | 9.60E-05 | 0.15  | NA |
| chr13 | 48877459  | 48878501  | RP11-305D15.2 | ENSG00000231473 | -185 | 0.32 | 0.18 | 9.60E-05 | 0.14  | NA |



|       |           |           |                  |                 |       |      |      |         |       |    |
|-------|-----------|-----------|------------------|-----------------|-------|------|------|---------|-------|----|
| chr13 | 44947371  | 44948443  | SERP2            | ENSG00000151778 | 106   | 0.4  | 0.21 | 0.00012 | 0.19  | NA |
| chr13 | 79232822  | 79233417  | RNF219           | ENSG00000152193 | 195   | 0.71 | 0.21 | 0.00012 | 0.49  | NA |
| chr13 | 23949134  | 23949940  | SACS             | ENSG00000151835 | 145   | 0.37 | 0.17 | 0.00021 | 0.2   | NA |
| chr13 | 38923957  | 38924413  | UFM1             | ENSG00000120686 | 199   | 0.5  | 0.2  | 0.00028 | 0.3   | NA |
| chr13 | 108519292 | 108521063 | FAM155A          | ENSG00000204442 | -1094 | 0.29 | 0.19 | 0.00033 | 0.1   | NA |
| chr13 | 25743998  | 25746127  | FAM123A          | ENSG00000165566 | 795   | 0.34 | 0.21 | 0.00041 | 0.12  | NA |
| chr13 | 20138855  | 20139323  | CASC4P1          | ENSG00000238132 | -49   | 0.72 | 0.47 | 0.00042 | 0.25  | NA |
| chr13 | 20735043  | 20736157  | GJA3             | ENSG00000121743 | -412  | 0.34 | 0.14 | 0.00043 | 0.2   | NA |
| chr13 | 115079664 | 115080365 | ZNF828           | ENSG00000198824 | 26    | 0.41 | 0.19 | 0.00049 | 0.22  | NA |
| chr13 | 91999541  | 92001441  | MIR17HG          | ENSG00000215417 | 417   | 0.28 | 0.19 | 0.00054 | 0.098 | NA |
| chr13 | 41345062  | 41345570  | MRPS31           | ENSG00000102738 | -237  | 0.34 | 0.15 | 0.00079 | 0.19  | NA |
| chr13 | 44359858  | 44361696  | ENOX1            | ENSG00000120658 | 267   | 0.28 | 0.19 | 0.00083 | 0.091 | NA |
| chr13 | 99228319  | 99229576  | STK24            | ENSG00000102572 | -489  | 0.35 | 0.2  | 0.00089 | 0.14  | NA |
| chr13 | 20766208  | 20767779  | GJB2             | ENSG00000165474 | 44    | 0.34 | 0.23 | 0.00091 | 0.1   | NA |
| chr13 | 103248813 | 103249992 | TPP2             | ENSG00000134900 | 49    | 0.3  | 0.19 | 0.00094 | 0.1   | NA |
| chr13 | 114875198 | 114875418 | RASA3-IT1        | ENSG00000232487 | -1013 | 0.87 | 0.59 | 0.00095 | 0.28  | NA |
| chr13 | 42030913  | 42032667  | C13orf15         | ENSG00000102760 | 95    | 0.35 | 0.17 | 0.0011  | 0.19  | NA |
| chr13 | 49794125  | 49795542  | MLNR             | ENSG00000102539 | 359   | 0.31 | 0.19 | 0.0013  | 0.13  | NA |
| chr13 | 45991974  | 45992591  | XXyac-YMR12DG2.1 | ENSG00000251015 | -15   | 0.27 | 0.11 | 0.0015  | 0.16  | NA |
| chr13 | 114505868 | 114506122 | FAM70B           | ENSG00000184497 | -28   | 0.24 | 0.55 | 0.0015  | -0.31 | NA |
| chr13 | 103425298 | 103426887 | C13orf27         | ENSG00000151287 | -204  | 0.59 | 0.45 | 0.0016  | 0.14  | NA |
| chr13 | 96328868  | 96329946  | DNAJC3-AS1       | ENSG00000247400 | -228  | 0.32 | 0.22 | 0.0022  | 0.11  | NA |
| chr13 | 100740956 | 100741805 | PCCA             | ENSG00000175198 | 111   | 0.36 | 0.21 | 0.0022  | 0.15  | NA |
| chr13 | 22243259  | 22245362  | FGF9             | ENSG00000102678 | -1212 | 0.32 | 0.2  | 0.0023  | 0.12  | NA |
| chr13 | 96204691  | 96205496  | CLDN10           | ENSG00000134873 | 114   | 0.39 | 0.24 | 0.0023  | 0.15  | NA |
| chr13 | 113343853 | 113345188 | ATP11A           | ENSG00000068650 | -123  | 0.35 | 0.21 | 0.0023  | 0.14  | NA |
| chr13 | 113622737 | 113623660 | MCF2L            | ENSG00000126217 | 441   | 0.31 | 0.16 | 0.0024  | 0.16  | NA |
| chr13 | 102568425 | 102569495 | FGF14            | ENSG00000102466 | 35    | 0.25 | 0.16 | 0.0025  | 0.094 | NA |
| chr13 | 25945993  | 25946953  | ATP8A2           | ENSG00000132932 | 264   | 0.28 | 0.19 | 0.0026  | 0.094 | NA |
| chr13 | 113656116 | 113656379 | MCF2L            | ENSG00000126217 | 40    | 0.38 | 0.18 | 0.0026  | 0.2   | NA |

|       |           |           |              |                 |       |      |      |        |        |    |
|-------|-----------|-----------|--------------|-----------------|-------|------|------|--------|--------|----|
| chr13 | 112758598 | 112760491 | RP11-450H6.2 | ENSG00000229520 | 1652  | 0.29 | 0.2  | 0.0027 | 0.093  | NA |
| chr13 | 24477426  | 24478053  | C1QTNF9B     | ENSG00000205863 | -945  | 0.46 | 0.3  | 0.0029 | 0.17   | NA |
| chr13 | 111364718 | 111368530 | CARS2        | ENSG00000134905 | -1791 | 0.27 | 0.19 | 0.003  | 0.072  | NA |
| chr13 | 24882098  | 24882951  | C1QTNF9      | ENSG00000240654 | -1192 | 0.92 | 0.82 | 0.0037 | 0.11   | NA |
| chr13 | 41363435  | 41364319  | SLC25A15     | ENSG00000102743 | 329   | 0.36 | 0.2  | 0.004  | 0.17   | NA |
| chr13 | 50366060  | 50367303  | KPNA3        | ENSG00000102753 | 376   | 0.3  | 0.18 | 0.004  | 0.12   | NA |
| chr13 | 37633395  | 37633966  | FAM48A       | ENSG00000102710 | -111  | 0.37 | 0.16 | 0.0046 | 0.21   | NA |
| chr13 | 113548643 | 113549127 | MCF2L        | ENSG00000126217 | 193   | 0.33 | 0.14 | 0.0051 | 0.19   | NA |
| chr13 | 79175610  | 79177985  | POU4F1       | ENSG00000152192 | 898   | 0.29 | 0.21 | 0.0052 | 0.076  | NA |
| chr13 | 20806016  | 20806867  | GJB6         | ENSG00000121742 | -1    | 0.39 | 0.23 | 0.0053 | 0.16   | NA |
| chr13 | 114534708 | 114535359 | GAS6         | ENSG00000183087 | 1681  | 0.96 | 0.75 | 0.0053 | 0.2    | NA |
| chr13 | 22247803  | 22249755  | FGF9         | ENSG00000102678 | 638   | 0.25 | 0.17 | 0.0059 | 0.071  | NA |
| chr13 | 22057995  | 22058261  | RP11-149B7.4 | ENSG00000226908 | 185   | 1    | 0.53 | 0.0064 | 0.47   | NA |
| chr13 | 40229743  | 40230181  | COG6         | ENSG00000133103 | 198   | 0.3  | 0.16 | 0.0079 | 0.14   | NA |
| chr13 | 99738331  | 99740225  | DOCK9        | ENSG00000088387 | -631  | 0.28 | 0.2  | 0.0091 | 0.079  | NA |
| chr13 | 114461829 | 114462490 | FAM70B       | ENSG00000184497 | -57   | 0.24 | 0.13 | 0.0094 | 0.11   | NA |
| chr13 | 58203586  | 58204322  | PCDH17       | ENSG00000118946 | -1990 | 0.48 | 0.22 | 0.014  | 0.26   | NA |
| chr13 | 22032862  | 22033730  | ZDHHC20      | ENSG00000180776 | 118   | 0.36 | 0.25 | 0.015  | 0.11   | NA |
| chr13 | 30423921  | 30424941  | UBL3         | ENSG00000122042 | 390   | 0.2  | 0.12 | 0.015  | 0.081  | NA |
| chr13 | 113750486 | 113751565 | MCF2L        | ENSG00000126217 | 1489  | 0.95 | 0.9  | 0.015  | 0.057  | NA |
| chr13 | 102068116 | 102069258 | NALCN        | ENSG00000102452 | 19    | 0.32 | 0.21 | 0.017  | 0.12   | NA |
| chr13 | 113729302 | 113729516 | MCF2L        | ENSG00000126217 | 628   | 0.97 | 0.84 | 0.018  | 0.13   | NA |
| chr13 | 27844658  | 27845525  | RASL11A      | ENSG00000122035 | -223  | 0.28 | 0.16 | 0.019  | 0.12   | NA |
| chr13 | 49106411  | 49107463  | RCBTB2       | ENSG00000136161 | 276   | 0.29 | 0.16 | 0.02   | 0.12   | NA |
| chr13 | 42614178  | 42615650  | DGKH         | ENSG00000102780 | 738   | 0.25 | 0.18 | 0.022  | 0.063  | NA |
| chr13 | 40176849  | 40177576  | LHFP         | ENSG00000183722 | 96    | 0.33 | 0.22 | 0.023  | 0.12   | NA |
| chr13 | 53226382  | 53226960  | SUGT1        | ENSG00000165416 | -173  | 0.43 | 0.15 | 0.024  | 0.27   | NA |
| chr13 | 114454895 | 114455871 | AC187648.1   | ENSG00000227208 | -1321 | 0.94 | 0.99 | 0.024  | -0.055 | NA |
| chr13 | 115046754 | 115048034 | UPF3A        | ENSG00000169062 | 335   | 0.28 | 0.2  | 0.025  | 0.087  | NA |
| chr13 | 21476759  | 21477384  | XPO4         | ENSG00000132953 | -185  | 0.44 | 0.26 | 0.026  | 0.18   | NA |

|       |           |           |               |                 |      |      |      |       |        |    |
|-------|-----------|-----------|---------------|-----------------|------|------|------|-------|--------|----|
| chr13 | 33589928  | 33591428  | KL            | ENSG00000133116 | 471  | 0.29 | 0.2  | 0.026 | 0.087  | NA |
| chr13 | 42621745  | 42623038  | DGKH          | ENSG00000102780 | -498 | 0.26 | 0.18 | 0.026 | 0.087  | NA |
| chr13 | 45914617  | 45915656  | TPT1          | ENSG00000133112 | 85   | 0.23 | 0.17 | 0.026 | 0.058  | NA |
| chr13 | 111213589 | 111214477 | RAB20         | ENSG00000139832 | 47   | 0.23 | 0.15 | 0.027 | 0.084  | NA |
| chr13 | 50655281  | 50656408  | DLEU2         | ENSG00000231607 | 264  | 0.37 | 0.21 | 0.028 | 0.16   | NA |
| chr13 | 108870502 | 108871328 | LIG4          | ENSG00000174405 | -199 | 0.34 | 0.24 | 0.029 | 0.1    | NA |
| chr13 | 111358080 | 111358894 | CARS2         | ENSG00000134905 | -343 | 0.31 | 0.2  | 0.029 | 0.11   | NA |
| chr13 | 48668845  | 48669392  | MED4          | ENSG00000136146 | 86   | 0.52 | 0.31 | 0.031 | 0.21   | NA |
| chr13 | 24463119  | 24463677  | MIPEP         | ENSG00000027001 | 139  | 0.39 | 0.22 | 0.032 | 0.16   | NA |
| chr13 | 80055066  | 80055713  | NDFIP2        | ENSG00000102471 | 102  | 0.3  | 0.22 | 0.032 | 0.073  | NA |
| chr13 | 46960684  | 46961670  | C13orf18      | ENSG00000102445 | 140  | 0.19 | 0.27 | 0.034 | -0.087 | NA |
| chr13 | 77600570  | 77601428  | FBXL3         | ENSG00000005812 | 221  | 0.37 | 0.23 | 0.034 | 0.14   | NA |
| chr13 | 29352787  | 29353205  | RP11-161P17.1 | ENSG00000236339 | 301  | 0.87 | 0.98 | 0.035 | -0.11  | NA |
| chr13 | 99404482  | 99405103  | SLC15A1       | ENSG00000088386 | 116  | 0.27 | 0.17 | 0.036 | 0.1    | NA |
| chr13 | 73632860  | 73634370  | KLF5          | ENSG00000102554 | 685  | 0.29 | 0.22 | 0.037 | 0.071  | NA |
| chr13 | 28712176  | 28713453  | PAN3          | ENSG00000152520 | 171  | 0.29 | 0.18 | 0.04  | 0.11   | NA |
| chr13 | 32885424  | 32885662  | ZAR1L         | ENSG00000189167 | 548  | 0.99 | 0.91 | 0.04  | 0.077  | NA |
| chr13 | 36049570  | 36050159  | MAB21L1       | ENSG00000180660 | 968  | 0.3  | 0.19 | 0.046 | 0.11   | NA |
| chr13 | 45011151  | 45011395  | FILIP1LP1     | ENSG00000225727 | -70  | 0.7  | 0.25 | 0.048 | 0.45   | NA |
| chr13 | 74708001  | 74709601  | KLF12         | ENSG00000118922 | -407 | 0.3  | 0.22 | 0.049 | 0.082  | NA |
| chr13 | 21099568  | 21100443  | CRYL1         | ENSG00000165475 | -9   | 0.26 | 0.16 | 0.05  | 0.11   | NA |
| chr13 | 26624725  | 26626265  | SHISA2        | ENSG00000180730 | -297 | 0.24 | 0.18 | 0.05  | 0.059  | NA |
| chr13 | 49549822  | 49551042  | FNDC3A        | ENSG00000102531 | 384  | 0.32 | 0.23 | 0.051 | 0.09   | NA |
| chr13 | 28194183  | 28196249  | LNX2          | ENSG00000139517 | -675 | 0.28 | 0.22 | 0.052 | 0.062  | NA |
| chr13 | 95953337  | 95954211  | ABCC4         | ENSG00000125257 | -185 | 0.29 | 0.2  | 0.053 | 0.093  | NA |
| chr13 | 31773919  | 31775034  | B3GALTL       | ENSG00000187676 | 403  | 0.27 | 0.2  | 0.054 | 0.076  | NA |
| chr13 | 93879245  | 93880877  | GPC6          | ENSG00000183098 | 966  | 0.24 | 0.17 | 0.054 | 0.069  | NA |
| chr13 | 27131568  | 27132677  | WASF3         | ENSG00000132970 | 282  | 0.32 | 0.24 | 0.055 | 0.086  | NA |
| chr13 | 30880899  | 30881939  | KATNAL1       | ENSG00000102781 | -426 | 0.31 | 0.56 | 0.06  | -0.25  | NA |
| chr13 | 111267780 | 111268778 | CARKD         | ENSG00000213995 | 398  | 0.25 | 0.15 | 0.066 | 0.098  | NA |

|       |           |           |               |                 |       |      |      |       |       |    |
|-------|-----------|-----------|---------------|-----------------|-------|------|------|-------|-------|----|
| chr13 | 46626454  | 46627019  | ZC3H13        | ENSG00000123200 | 84    | 0.35 | 0.25 | 0.067 | 0.097 | NA |
| chr13 | 41634172  | 41636120  | ELF1          | ENSG00000120690 | -70   | 0.27 | 0.22 | 0.068 | 0.051 | NA |
| chr13 | 114538394 | 114538673 | GAS6          | ENSG00000183087 | 484   | 0.94 | 0.83 | 0.07  | 0.11  | NA |
| chr13 | 27825351  | 27826049  | RPL21         | ENSG00000122026 | 254   | 0.27 | 0.19 | 0.071 | 0.077 | NA |
| chr13 | 28024165  | 28025278  | MTIF3         | ENSG00000122033 | -543  | 0.24 | 0.16 | 0.072 | 0.084 | NA |
| chr13 | 32889533  | 32889900  | BRCA2         | ENSG00000139618 | 105   | 0.32 | 0.21 | 0.076 | 0.11  | NA |
| chr13 | 38443682  | 38444228  | TRPC4         | ENSG00000133107 | -95   | 0.29 | 0.41 | 0.077 | -0.12 | NA |
| chr13 | 99852386  | 99853552  | RP11-87L10.1  | ENSG00000228889 | -5    | 0.25 | 0.2  | 0.079 | 0.054 | NA |
| chr13 | 72439362  | 72440059  | DACH1         | ENSG00000165659 | 1197  | 0.27 | 0.19 | 0.081 | 0.081 | NA |
| chr13 | 77566089  | 77566599  | CLN5          | ENSG00000102805 | 125   | 0.17 | 0.27 | 0.085 | -0.1  | NA |
| chr13 | 98794398  | 98796241  | FARP1         | ENSG00000152767 | -115  | 0.27 | 0.22 | 0.085 | 0.051 | NA |
| chr13 | 96296143  | 96297059  | DZIP1         | ENSG00000134874 | 319   | 0.2  | 0.15 | 0.09  | 0.054 | NA |
| chr13 | 41496587  | 41496806  | AL157877.1    | ENSG00000239827 | -786  | 0.64 | 1    | 0.095 | -0.36 | NA |
| chr13 | 48611646  | 48612268  | NUDT15        | ENSG00000136159 | 254   | 0.26 | 0.13 | 0.096 | 0.13  | NA |
| chr13 | 81229047  | 81229445  | PWWP2AP1      | ENSG00000226683 | 356   | 0.73 | 0.84 | 0.097 | -0.11 | NA |
| chr13 | 114144455 | 114145625 | DCUN1D2       | ENSG00000150401 | -231  | 0.31 | 0.22 | 0.097 | 0.084 | NA |
| chr13 | 28544524  | 28544890  | CDX2          | ENSG00000165556 | -1202 | 0.44 | 1    | 0.11  | -0.56 | NA |
| chr13 | 47012102  | 47012440  | PPP1R2P4      | ENSG00000241353 | -148  | 0.63 | 0.46 | 0.11  | 0.16  | NA |
| chr13 | 96742138  | 96744162  | HS6ST3        | ENSG00000185352 | 57    | 0.24 | 0.19 | 0.11  | 0.051 | NA |
| chr13 | 112760865 | 112761113 | RP11-450H6.2  | ENSG00000229520 | 207   | 0.35 | 0.2  | 0.11  | 0.15  | NA |
| chr13 | 23412207  | 23412623  | IPMKP1        | ENSG00000226507 | -396  | 0.6  | 0.2  | 0.12  | 0.4   | NA |
| chr13 | 23422687  | 23422896  | RFESDP1       | ENSG00000231650 | -1449 | 1    | 0.8  | 0.12  | 0.2   | NA |
| chr13 | 78271801  | 78272906  | SLAIN1        | ENSG00000139737 | 330   | 0.3  | 0.22 | 0.12  | 0.078 | NA |
| chr13 | 112984966 | 112985733 | RP11-315H15.1 | ENSG00000223626 | 190   | 0.31 | 0.24 | 0.12  | 0.068 | NA |
| chr13 | 113497296 | 113497661 | ATP11A        | ENSG00000068650 | 855   | 0.79 | 0.89 | 0.12  | -0.1  | NA |
| chr13 | 114427774 | 114429465 | GRK1          | ENSG00000185974 | -840  | 0.21 | 0.35 | 0.12  | -0.14 | NA |
| chr13 | 36871667  | 36872059  | C13orf38      | ENSG00000242715 | 23    | 0.28 | 0.14 | 0.13  | 0.14  | NA |
| chr13 | 41495776  | 41496213  | AL157877.1    | ENSG00000239827 | -139  | 0.14 | 0.25 | 0.13  | -0.11 | NA |
| chr13 | 45694522  | 45694966  | GTF2F2        | ENSG00000188342 | 94    | 0.32 | 0.16 | 0.13  | 0.16  | NA |
| chr13 | 60970403  | 60972045  | TDRD3         | ENSG00000083544 | 633   | 0.21 | 0.15 | 0.13  | 0.06  | NA |

|       |           |           |               |                 |       |      |      |      |        |    |
|-------|-----------|-----------|---------------|-----------------|-------|------|------|------|--------|----|
| chr13 | 29233148  | 29233513  | POMP          | ENSG00000132963 | 89    | 0.29 | 0.21 | 0.14 | 0.079  | NA |
| chr13 | 24734771  | 24735538  | SPATA13       | ENSG00000182957 | 293   | 0.22 | 0.32 | 0.15 | -0.1   | NA |
| chr13 | 25086522  | 25087067  | PARP4         | ENSG00000102699 | 154   | 0.2  | 0.27 | 0.16 | -0.07  | NA |
| chr13 | 26042693  | 26043486  | ATP8A2        | ENSG00000132932 | -24   | 0.3  | 0.2  | 0.16 | 0.1    | NA |
| chr13 | 28366549  | 28368505  | GSX1          | ENSG00000169840 | 747   | 0.27 | 0.2  | 0.16 | 0.066  | NA |
| chr13 | 37393213  | 37394092  | RFXAP         | ENSG00000133111 | 291   | 0.26 | 0.19 | 0.16 | 0.075  | NA |
| chr13 | 113862362 | 113864517 | PCID2         | ENSG00000126226 | -1072 | 0.23 | 0.19 | 0.16 | 0.044  | NA |
| chr13 | 115000148 | 115000874 | CDC16         | ENSG00000130177 | 149   | 0.29 | 0.17 | 0.16 | 0.12   | NA |
| chr13 | 39261236  | 39262299  | FREM2         | ENSG00000150893 | 501   | 0.2  | 0.16 | 0.18 | 0.041  | NA |
| chr13 | 112707804 | 112708696 | SNORD44       | ENSG00000200072 | 1858  | 0.33 | 0.23 | 0.18 | 0.1    | NA |
| chr13 | 20207461  | 20208252  | MPHOSPH8      | ENSG00000196199 | 68    | 0.6  | 0.22 | 0.2  | 0.38   | NA |
| chr13 | 22177803  | 22178452  | EFHA1         | ENSG00000165487 | -277  | 0.29 | 0.23 | 0.2  | 0.057  | NA |
| chr13 | 30054342  | 30054558  | MTUS2         | ENSG00000132938 | 256   | 0.92 | 0.86 | 0.2  | 0.068  | NA |
| chr13 | 77900504  | 77901140  | MYCBP2        | ENSG00000005810 | 355   | 0.26 | 0.17 | 0.2  | 0.089  | NA |
| chr13 | 96705229  | 96705909  | UGGT2         | ENSG00000102595 | 23    | 0.26 | 0.2  | 0.2  | 0.062  | NA |
| chr13 | 101240689 | 101241226 | A2LD1         | ENSG00000134864 | 28    | 0.34 | 0.26 | 0.2  | 0.088  | NA |
| chr13 | 52025691  | 52027946  | INTS6         | ENSG00000102786 | -1115 | 0.27 | 0.22 | 0.21 | 0.047  | NA |
| chr13 | 21714289  | 21715115  | SAP18         | ENSG00000150459 | 49    | 0.27 | 0.21 | 0.22 | 0.062  | NA |
| chr13 | 107219926 | 107220664 | ARGLU1        | ENSG00000134884 | -324  | 0.21 | 0.17 | 0.24 | 0.041  | NA |
| chr13 | 21572797  | 21573460  | U6            | ENSG00000251902 | 478   | 0.98 | 0.95 | 0.26 | 0.025  | NA |
| chr13 | 95354189  | 95355184  | RP11-477B16.4 | ENSG00000238230 | 430   | 0.34 | 0.26 | 0.26 | 0.081  | NA |
| chr13 | 50018121  | 50018738  | CAB39L        | ENSG00000102547 | -240  | 0.39 | 0.3  | 0.29 | 0.099  | NA |
| chr13 | 25496588  | 25497299  | CENPJ         | ENSG00000151849 | 5     | 0.3  | 0.23 | 0.3  | 0.064  | NA |
| chr13 | 25874994  | 25876200  | NUPL1         | ENSG00000139496 | -65   | 0.29 | 0.22 | 0.3  | 0.07   | NA |
| chr13 | 42845853  | 42846807  | AKAP11        | ENSG0000023516  | 41    | 0.32 | 0.26 | 0.3  | 0.056  | NA |
| chr13 | 48575080  | 48575575  | SUCLA2        | ENSG00000136143 | -217  | 0.29 | 0.36 | 0.3  | -0.074 | NA |
| chr13 | 60737660  | 60738285  | DIAPH3        | ENSG00000139734 | -72   | 0.24 | 0.18 | 0.31 | 0.052  | NA |
| chr13 | 67804593  | 67805459  | PCDH9         | ENSG00000184226 | -558  | 0.24 | 0.2  | 0.31 | 0.047  | NA |
| chr13 | 100153365 | 100154138 | TM9SF2        | ENSG00000125304 | 80    | 0.23 | 0.19 | 0.31 | 0.041  | NA |
| chr13 | 21140951  | 21141719  | IFT88         | ENSG00000032742 | 127   | 0.26 | 0.19 | 0.32 | 0.067  | NA |

|       |           |           |               |                 |       |      |      |      |        |    |
|-------|-----------|-----------|---------------|-----------------|-------|------|------|------|--------|----|
| chr13 | 49821925  | 49822703  | CDADC1        | ENSG00000102543 | 267   | 0.51 | 0.37 | 0.32 | 0.14   | NA |
| chr13 | 76123438  | 76124268  | COMMD6        | ENSG00000188243 | -289  | 0.29 | 0.2  | 0.32 | 0.096  | NA |
| chr13 | 78492425  | 78493382  | EDNRB         | ENSG00000136160 | 42    | 0.35 | 0.25 | 0.32 | 0.097  | NA |
| chr13 | 23489630  | 23490058  | NUS1P2        | ENSG00000234685 | 54    | 0.13 | 0.25 | 0.33 | -0.12  | NA |
| chr13 | 24152899  | 24154140  | TNFRSF19      | ENSG00000127863 | 21    | 0.19 | 0.15 | 0.33 | 0.033  | NA |
| chr13 | 19172475  | 19172841  | RP11-484H12.1 | ENSG00000230473 | -1466 | 0.91 | 0.72 | 0.35 | 0.19   | NA |
| chr13 | 19239270  | 19239918  | FEM1AP4       | ENSG00000235876 | 219   | 0.79 | 0.84 | 0.35 | -0.058 | NA |
| chr13 | 31191511  | 31192189  | HMGB1         | ENSG00000189403 | -116  | 0.18 | 0.27 | 0.35 | -0.098 | NA |
| chr13 | 47126970  | 47128706  | LRCH1         | ENSG00000136141 | 535   | 0.34 | 0.28 | 0.35 | 0.064  | NA |
| chr13 | 114462702 | 114462957 | FAM70B        | ENSG00000184497 | 613   | 0.26 | 0.44 | 0.35 | -0.18  | NA |
| chr13 | 33001249  | 33002078  | N4BP2L1       | ENSG00000139597 | 480   | 0.26 | 0.2  | 0.36 | 0.058  | NA |
| chr13 | 43566074  | 43566508  | EPSTI1        | ENSG00000133106 | 10    | 0.39 | 0.32 | 0.36 | 0.07   | NA |
| chr13 | 46038953  | 46039681  | COG3          | ENSG00000136152 | 257   | 0.25 | 0.2  | 0.36 | 0.049  | NA |
| chr13 | 30995685  | 30995947  | RP11-223E19.2 | ENSG00000225039 | 558   | 0.47 | 0.36 | 0.37 | 0.11   | NA |
| chr13 | 45149970  | 45152288  | TSC22D1       | ENSG00000102804 | -737  | 0.24 | 0.27 | 0.38 | -0.031 | NA |
| chr13 | 48806982  | 48807948  | ITM2B         | ENSG00000136156 | 171   | 0.3  | 0.23 | 0.38 | 0.068  | NA |
| chr13 | 50159386  | 50160106  | RCBTB1        | ENSG00000136144 | -32   | 0.29 | 0.23 | 0.38 | 0.069  | NA |
| chr13 | 52585314  | 52586567  | ATP7B         | ENSG00000123191 | -393  | 0.19 | 0.15 | 0.38 | 0.039  | NA |
| chr13 | 114537440 | 114537790 | GAS6          | ENSG00000183087 | -901  | 0.94 | 1    | 0.38 | -0.059 | NA |
| chr13 | 29067788  | 29069977  | FLT1          | ENSG00000102755 | 350   | 0.22 | 0.2  | 0.39 | 0.022  | NA |
| chr13 | 53313127  | 53314045  | LECT1         | ENSG00000136110 | -99   | 0.33 | 0.26 | 0.39 | 0.066  | NA |
| chr13 | 52377821  | 52378573  | DHRS12        | ENSG00000102796 | -338  | 0.39 | 0.32 | 0.4  | 0.067  | NA |
| chr13 | 53191405  | 53191872  | HNRNPA1L2     | ENSG00000139675 | 33    | 0.42 | 0.28 | 0.4  | 0.14   | NA |
| chr13 | 114018789 | 114019685 | GRTP1         | ENSG00000139835 | -791  | 0.41 | 0.45 | 0.4  | -0.045 | NA |
| chr13 | 95253814  | 95254569  | GPR180        | ENSG00000152749 | 34    | 0.37 | 0.19 | 0.41 | 0.19   | NA |
| chr13 | 113350478 | 113351511 | RP11-144L2.1  | ENSG00000237030 | -151  | 0.98 | 0.94 | 0.42 | 0.046  | NA |
| chr13 | 64385719  | 64386057  | RP11-394A14.1 | ENSG00000213232 | -147  | 0.98 | 0.94 | 0.43 | 0.045  | NA |
| chr13 | 73355703  | 73356612  | DIS3          | ENSG00000083520 | -165  | 0.31 | 0.25 | 0.43 | 0.065  | NA |
| chr13 | 45563288  | 45564002  | NUFIP1        | ENSG00000083635 | -27   | 0.25 | 0.2  | 0.46 | 0.051  | NA |
| chr13 | 113677627 | 113677836 | MCF2L         | ENSG00000126217 | -1247 | 0.52 | 0.38 | 0.46 | 0.13   | NA |

|       |           |           |               |                 |       |      |      |      |        |    |
|-------|-----------|-----------|---------------|-----------------|-------|------|------|------|--------|----|
| chr13 | 88323569  | 88324640  | RP11-342C20.3 | ENSG00000228824 | -590  | 0.25 | 0.22 | 0.47 | 0.031  | NA |
| chr13 | 100637112 | 100637472 | ZIC2          | ENSG00000043355 | 249   | 0.31 | 0.22 | 0.47 | 0.097  | NA |
| chr13 | 36044844  | 36045481  | NBEA          | ENSG00000172915 | -485  | 0.33 | 0.24 | 0.48 | 0.091  | NA |
| chr13 | 42534880  | 42535461  | KIAA0564      | ENSG00000102763 | 39    | 0.29 | 0.2  | 0.49 | 0.09   | NA |
| chr13 | 52768295  | 52768854  | MRPS31P3      | ENSG00000243406 | -61   | 0.43 | 0.32 | 0.49 | 0.11   | NA |
| chr13 | 77554263  | 77554535  | RPL7P44       | ENSG00000233873 | 1652  | 0.38 | 0.2  | 0.49 | 0.18   | NA |
| chr13 | 42623339  | 42623560  | DGKH          | ENSG00000102780 | 560   | 0.3  | 0.2  | 0.5  | 0.11   | NA |
| chr13 | 41885251  | 41886196  | NAA16         | ENSG00000172766 | 382   | 0.29 | 0.24 | 0.51 | 0.05   | NA |
| chr13 | 103498100 | 103498763 | ERCC5         | ENSG00000134899 | 257   | 0.29 | 0.23 | 0.51 | 0.061  | NA |
| chr13 | 111805638 | 111806531 | ARHGEF7       | ENSG00000102606 | 90    | 0.18 | 0.16 | 0.51 | 0.022  | NA |
| chr13 | 98628059  | 98629306  | IPO5          | ENSG00000065150 | -37   | 0.32 | 0.29 | 0.52 | 0.036  | NA |
| chr13 | 76055077  | 76056799  | TBC1D4        | ENSG00000136111 | 312   | 0.21 | 0.19 | 0.54 | 0.022  | NA |
| chr13 | 98085220  | 98087119  | RAP2A         | ENSG00000125249 | -307  | 0.29 | 0.27 | 0.54 | 0.029  | NA |
| chr13 | 110958891 | 110960590 | COL4A1        | ENSG00000187498 | -262  | 0.22 | 0.2  | 0.54 | 0.021  | NA |
| chr13 | 114198318 | 114198552 | TMCO3         | ENSG00000150403 | -1635 | 1    | 0.9  | 0.54 | 0.1    | NA |
| chr13 | 21750287  | 21751332  | SKA3          | ENSG00000165480 | -197  | 0.25 | 0.22 | 0.55 | 0.031  | NA |
| chr13 | 114586257 | 114586710 | RP11-199F6.5  | ENSG00000226921 | 45    | 1    | 0.97 | 0.55 | 0.028  | NA |
| chr13 | 37574792  | 37575223  | EXOSC8        | ENSG00000120699 | 90    | 0.27 | 0.2  | 0.56 | 0.067  | NA |
| chr13 | 48892635  | 48893857  | RP11-305D15.6 | ENSG00000238086 | 1365  | 0.86 | 0.83 | 0.59 | 0.027  | NA |
| chr13 | 114290024 | 114290262 | TFDP1         | ENSG00000198176 | -1323 | 0.95 | 0.98 | 0.59 | -0.034 | NA |
| chr13 | 25861234  | 25861794  | MTMR6         | ENSG00000139505 | 113   | 0.23 | 0.18 | 0.6  | 0.049  | NA |
| chr13 | 39612417  | 39612930  | NHLRC3        | ENSG00000188811 | 230   | 0.39 | 0.28 | 0.6  | 0.12   | NA |
| chr13 | 52702773  | 52703387  | AL139082.1    | ENSG00000245521 | 53    | 0.26 | 0.22 | 0.6  | 0.041  | NA |
| chr13 | 113540350 | 113540558 | AL356740.1    | ENSG00000234603 | 903   | 0.36 | 0.2  | 0.6  | 0.16   | NA |
| chr13 | 107186468 | 107189024 | EFNB2         | ENSG00000125266 | -284  | 0.23 | 0.22 | 0.62 | 0.013  | NA |
| chr13 | 114017866 | 114018463 | GRTP1         | ENSG00000139835 | 249   | 0.21 | 0.19 | 0.62 | 0.021  | NA |
| chr13 | 32605320  | 32605903  | FRY           | ENSG00000073910 | 174   | 0.27 | 0.23 | 0.63 | 0.04   | NA |
| chr13 | 36919737  | 36921004  | SPG20         | ENSG00000133104 | -599  | 0.22 | 0.2  | 0.63 | 0.022  | NA |
| chr13 | 88326600  | 88326919  | SLITRK5       | ENSG00000165300 | 1261  | 0.43 | 0.53 | 0.64 | -0.097 | NA |
| chr13 | 31377145  | 31377493  | RP11-469L23.2 | ENSG00000237879 | -24   | 0.33 | 0.17 | 0.65 | 0.17   | NA |

|       |           |           |               |                 |       |      |      |      |         |    |
|-------|-----------|-----------|---------------|-----------------|-------|------|------|------|---------|----|
| chr13 | 100631752 | 100635526 | ZIC2          | ENSG00000043355 | -387  | 0.26 | 0.26 | 0.67 | 0.0087  | NA |
| chr13 | 44542468  | 44542893  | DGKZP1        | ENSG00000179611 | 120   | 0.9  | 0.87 | 0.69 | 0.032   | NA |
| chr13 | 20356147  | 20357234  | PSPC1         | ENSG00000121390 | 367   | 0.23 | 0.22 | 0.71 | 0.013   | NA |
| chr13 | 44543782  | 44544018  | DGKZP1        | ENSG00000179611 | 1340  | 0.95 | 0.98 | 0.71 | -0.029  | NA |
| chr13 | 21833761  | 21834456  | RP11-101P17.6 | ENSG00000239501 | -60   | 0.97 | 0.98 | 0.74 | -0.011  | NA |
| chr13 | 95359641  | 95359874  | AL137061.2    | ENSG00000248922 | 993   | 0.21 | 0.19 | 0.75 | 0.028   | NA |
| chr13 | 19751260  | 19751483  | TUBA3C        | ENSG00000198033 | 1780  | 0.87 | 0.9  | 0.78 | -0.024  | NA |
| chr13 | 27998586  | 27999178  | GTF3A         | ENSG00000122034 | 201   | 0.21 | 0.2  | 0.79 | 0.014   | NA |
| chr13 | 20135399  | 20136041  | ESRRAP1       | ENSG00000215572 | -311  | 0.88 | 0.89 | 0.8  | -0.012  | NA |
| chr13 | 39611688  | 39612116  | C13orf23      | ENSG00000120685 | 72    | 0.29 | 0.33 | 0.8  | -0.033  | NA |
| chr13 | 95248288  | 95248672  | TGDS          | ENSG00000088451 | 16    | 0.23 | 0.25 | 0.8  | -0.02   | NA |
| chr13 | 98828563  | 98829385  | RNF113B       | ENSG00000139797 | 545   | 0.99 | 1    | 0.8  | -0.0073 | NA |
| chr13 | 47370763  | 47371484  | ESD           | ENSG00000139684 | 145   | 0.34 | 0.37 | 0.81 | -0.031  | NA |
| chr13 | 37005581  | 37006453  | CCNA1         | ENSG00000133101 | 50    | 0.19 | 0.18 | 0.84 | 0.0094  | NA |
| chr13 | 43148277  | 43149282  | TNFSF11       | ENSG00000120659 | 490   | 0.27 | 0.25 | 0.85 | 0.02    | NA |
| chr13 | 70681732  | 70682219  | KLHL1         | ENSG00000150361 | -161  | 0.25 | 0.27 | 0.85 | -0.016  | NA |
| chr13 | 73301230  | 73302154  | MZT1          | ENSG00000204899 | 133   | 0.23 | 0.22 | 0.85 | 0.013   | NA |
| chr13 | 43597504  | 43597856  | DNAJC15       | ENSG00000120675 | 341   | 0.19 | 0.21 | 0.87 | -0.018  | NA |
| chr13 | 52979999  | 52980586  | THSD1         | ENSG00000136114 | -29   | 0.22 | 0.24 | 0.9  | -0.021  | NA |
| chr13 | 113242125 | 113242656 | TUBGCP3       | ENSG00000126216 | 49    | 0.3  | 0.31 | 0.9  | -0.0086 | NA |
| chr13 | 79980004  | 79980723  | RBM26         | ENSG00000139746 | -13   | 0.24 | 0.23 | 0.91 | 0.0093  | NA |
| chr13 | 21347443  | 21348257  | N6AMT2        | ENSG00000150456 | 207   | 0.25 | 0.11 | 0.92 | 0.14    | NA |
| chr13 | 34392127  | 34392493  | RFC3          | ENSG00000133119 | 124   | 0.33 | 0.26 | 0.92 | 0.075   | NA |
| chr13 | 113745161 | 113745644 | MCF2L         | ENSG00000126217 | 119   | 0.97 | 1    | 0.93 | -0.03   | NA |
| chr13 | 113761566 | 113765534 | F7            | ENSG00000057593 | -1104 | 0.35 | 0.35 | 0.94 | -0.0049 | NA |
| chr13 | 33160284  | 33160913  | PDS5B         | ENSG00000083642 | 34    | 0.18 | 0.16 | 0.95 | 0.018   | NA |
| chr13 | 36788414  | 36789038  | SOHLH2        | ENSG00000120669 | -1    | 0.99 | 0.98 | 0.97 | 0.013   | NA |
| chr13 | 19173704  | 19174808  | RP11-484H12.1 | ENSG00000230473 | 132   | 0.54 | 0.54 | 1    | -0.0004 | NA |
| chr13 | 21872179  | 21872665  | RP11-101P17.7 | ENSG00000244054 | 144   | 0.32 | 0.33 | 1    | -0.012  | NA |
| chr13 | 21894085  | 21894606  | GRK6P1        | ENSG00000215571 | 1050  | 1    | 0.98 | 1    | 0.019   | NA |



|       |           |           |              |                 |       |      |      |    |         |    |
|-------|-----------|-----------|--------------|-----------------|-------|------|------|----|---------|----|
| chr13 | 23471763  | 23471969  | BASP1P1      | ENSG00000230535 | 278   | 1    | 1    | 1  | 0       | NA |
| chr13 | 25670041  | 25670531  | PABPC3       | ENSG00000151846 | -14   | 0.41 | 0.41 | 1  | 0.0061  | NA |
| chr13 | 26795809  | 26796712  | RNF6         | ENSG00000127870 | -432  | 0.23 | 0.23 | 1  | -0.0011 | NA |
| chr13 | 26827936  | 26829103  | CDK8         | ENSG00000132964 | 243   | 0.4  | 0.4  | 1  | -0.0041 | NA |
| chr13 | 27334226  | 27335205  | GPR12        | ENSG00000132975 | -288  | 0.22 | 0.23 | 1  | -0.0043 | NA |
| chr13 | 37247949  | 37248463  | C13orf36     | ENSG00000180440 | 157   | 0.25 | 0.26 | 1  | -0.011  | NA |
| chr13 | 41706202  | 41707120  | KBTBD6       | ENSG00000165572 | 221   | 0.36 | 0.37 | 1  | -0.0087 | NA |
| chr13 | 44544202  | 44544578  | DGKZP1       | ENSG00000179611 | 1830  | 0.98 | 0.98 | 1  | 0.0091  | NA |
| chr13 | 45965248  | 45965559  | RCN1P2       | ENSG00000214455 | -1    | 1    | 0.97 | 1  | 0.033   | NA |
| chr13 | 50509944  | 50511198  | C13orf1      | ENSG00000123178 | -95   | 0.25 | 0.24 | 1  | 0.0069  | NA |
| chr13 | 50570375  | 50571643  | TRIM13       | ENSG00000204977 | 370   | 0.26 | 0.27 | 1  | -0.003  | NA |
| chr13 | 51483747  | 51484591  | RNASEH2B     | ENSG00000136104 | 355   | 0.22 | 0.22 | 1  | 0.0029  | NA |
| chr13 | 51796492  | 51796888  | FAM124A      | ENSG00000150510 | 187   | 0.14 | 0.14 | 1  | 0.0044  | NA |
| chr13 | 52158056  | 52159235  | WDFY2        | ENSG00000139668 | 1     | 0.23 | 0.23 | 1  | -0.0015 | NA |
| chr13 | 52733378  | 52733861  | NEK3         | ENSG00000136098 | -109  | 0.2  | 0.21 | 1  | -0.012  | NA |
| chr13 | 57714971  | 57715304  | PRR20A       | ENSG00000204919 | 85    | 1    | 1    | 1  | 0       | NA |
| chr13 | 69558904  | 69559304  | ZDHHC20P4    | ENSG00000232380 | -86   | 0.98 | 1    | 1  | -0.025  | NA |
| chr13 | 76111673  | 76112044  | COMMD6       | ENSG00000188243 | -104  | 0.25 | 0.23 | 1  | 0.019   | NA |
| chr13 | 77459322  | 77461099  | KCTD12       | ENSG00000178695 | 315   | 0.22 | 0.22 | 1  | -0.0024 | NA |
| chr13 | 90015412  | 90015775  | SP3P         | ENSG00000225530 | -115  | 1    | 0.99 | 1  | 0.0084  | NA |
| chr13 | 100150692 | 100151020 | AL139035.1   | ENSG00000233552 | -1830 | 0.24 | 0.2  | 1  | 0.04    | NA |
| chr13 | 101184396 | 101184848 | A2LD1        | ENSG00000134864 | 1285  | 0.99 | 0.99 | 1  | 0.0037  | NA |
| chr13 | 103052361 | 103052944 | FGF14        | ENSG00000102466 | 1472  | 0.23 | 0.24 | 1  | -0.0029 | NA |
| chr13 | 108518334 | 108518633 | FAM155A      | ENSG00000204442 | 600   | 0.2  | 0.22 | 1  | -0.021  | NA |
| chr13 | 112238672 | 112238893 | RP11-65D24.2 | ENSG00000204398 | -1856 | 0.93 | 0.92 | 1  | 0.0067  | NA |
| chr13 | 113410004 | 113410362 | ATP11A-AS1   | ENSG00000232684 | -1176 | 0.95 | 0.98 | 1  | -0.027  | NA |
| chr13 | 113742736 | 113743019 | MCF2L        | ENSG00000126217 | 767   | 0.93 | 1    | 1  | -0.071  | NA |
| chr13 | 114507535 | 114507980 | FAM70B       | ENSG00000184497 | 1734  | 1    | 1    | 1  | 0       | NA |
| chr13 | 20134266  | 20134485  | ESRRAP1      | ENSG00000215572 | 1034  | 1    | NA   | NA | NA      | NA |
| chr13 | 21678416  | 21678648  | IPPKP1       | ENSG00000225585 | -22   | 1    | NA   | NA | NA      | NA |

|       |           |           |               |                 |       |      |      |          |       |    |
|-------|-----------|-----------|---------------|-----------------|-------|------|------|----------|-------|----|
| chr13 | 21835389  | 21835608  | ESRRAP2       | ENSG00000235438 | 1327  | 0.75 | NA   | NA       | NA    | NA |
| chr13 | 23270580  | 23270919  | FTH1P7        | ENSG00000232187 | -36   | NA   | 1    | NA       | NA    | NA |
| chr13 | 24553676  | 24554007  | RP11-309I15.1 | ENSG00000228741 | -108  | 0.22 | NA   | NA       | NA    | NA |
| chr13 | 24902292  | 24902696  | NUS1P3        | ENSG00000234627 | 145   | NA   | 1    | NA       | NA    | NA |
| chr13 | 28365545  | 28365785  | GSX1          | ENSG00000169840 | -1115 | NA   | 0.2  | NA       | NA    | NA |
| chr13 | 37573273  | 37573612  | ALG5          | ENSG00000120697 | 31    | 0.21 | NA   | NA       | NA    | NA |
| chr13 | 44715873  | 44716242  | RP11-478K15.2 | ENSG00000227258 | -625  | 1    | NA   | NA       | NA    | NA |
| chr13 | 50265224  | 50265598  | EBPL          | ENSG00000123179 | 149   | 0.33 | NA   | NA       | NA    | NA |
| chr13 | 53029194  | 53030128  | CKAP2         | ENSG00000136108 | 166   | 0.16 | NA   | NA       | NA    | NA |
| chr13 | 53063034  | 53063436  | RP11-78J21.4  | ENSG00000244471 | 107   | 1    | NA   | NA       | NA    | NA |
| chr13 | 80913157  | 80913461  | SPRY2         | ENSG00000136158 | -337  | 0.18 | NA   | NA       | NA    | NA |
| chr13 | 110960924 | 110961143 | COL4A2        | ENSG00000134871 | 1402  | NA   | 0.11 | NA       | NA    | NA |
| chr13 | 111290666 | 111290970 | AL139385.1    | ENSG00000255831 | -737  | 0.91 | NA   | NA       | NA    | NA |
| chr13 | 113241711 | 113241925 | TUBGCP3       | ENSG00000126216 | -158  | NA   | 1    | NA       | NA    | NA |
| chr13 | 114145965 | 114146172 | TMCO3         | ENSG00000150403 | 657   | NA   | 0.33 | NA       | NA    | NA |
| chr14 | 29234889  | 29235908  | FOXG1         | ENSG00000176165 | 348   | 0.61 | 0.32 | 2.50E-09 | 0.29  | NA |
| chr14 | 105932793 | 105933036 | MTA1          | ENSG00000182979 | 1243  | 0.82 | 0.41 | 4.80E-09 | 0.41  | NA |
| chr14 | 106938196 | 106938818 | NCRNA00221    | ENSG00000187156 | 62    | 0.86 | 0.72 | 1.40E-08 | 0.14  | NA |
| chr14 | 37053134  | 37053690  | NKX2-8        | ENSG00000136327 | -1600 | 0.52 | 0.29 | 4.80E-08 | 0.24  | NA |
| chr14 | 103655241 | 103655928 | AL161669.2    | ENSG00000251533 | -219  | 0.34 | 0.18 | 9.30E-08 | 0.16  | NA |
| chr14 | 51134480  | 51135304  | SAV1          | ENSG00000151748 | 157   | 0.34 | 0.15 | 1.70E-07 | 0.18  | NA |
| chr14 | 38678245  | 38680937  | SSTR1         | ENSG00000139874 | 1270  | 0.44 | 0.24 | 4.40E-07 | 0.2   | NA |
| chr14 | 50582970  | 50583504  | METTL21D      | ENSG00000100483 | -256  | 0.14 | 0.34 | 2.00E-06 | -0.2  | NA |
| chr14 | 104094551 | 104096361 | RP11-73M18.2  | ENSG00000256500 | -69   | 0.29 | 0.19 | 2.30E-06 | 0.11  | NA |
| chr14 | 31343355  | 31344757  | COCH          | ENSG00000100473 | 315   | 0.32 | 0.14 | 3.10E-06 | 0.18  | NA |
| chr14 | 103522988 | 103524431 | CDC42BPB      | ENSG00000198752 | 90    | 0.23 | 0.13 | 4.60E-06 | 0.1   | NA |
| chr14 | 105992499 | 105996414 | TMEM121       | ENSG00000184986 | 1516  | 0.42 | 0.33 | 8.00E-06 | 0.09  | NA |
| chr14 | 20106918  | 20107278  | RP11-244H18.3 | ENSG00000257357 | 1635  | 0.34 | 0.59 | 8.60E-06 | -0.25 | NA |
| chr14 | 105936264 | 105936558 | RP11-521B24.5 | ENSG00000257270 | 543   | 0.95 | 0.7  | 9.80E-06 | 0.25  | NA |
| chr14 | 38063663  | 38065665  | FOXA1         | ENSG00000129514 | -425  | 0.24 | 0.14 | 1.10E-05 | 0.1   | NA |

|       |           |           |               |                 |       |      |      |          |        |    |
|-------|-----------|-----------|---------------|-----------------|-------|------|------|----------|--------|----|
| chr14 | 92979726  | 92981228  | RIN3          | ENSG00000100599 | 352   | 0.66 | 0.49 | 1.10E-05 | 0.17   | NA |
| chr14 | 24044886  | 24046760  | JPH4          | ENSG00000092051 | 852   | 0.33 | 0.23 | 2.10E-05 | 0.1    | NA |
| chr14 | 35591126  | 35592003  | PPP2R3C       | ENSG00000092020 | -45   | 0.22 | 0.58 | 2.10E-05 | -0.36  | NA |
| chr14 | 103593234 | 103593923 | TNFAIP2       | ENSG00000185215 | -335  | 0.16 | 0.34 | 3.00E-05 | -0.18  | NA |
| chr14 | 105218946 | 105220090 | SIVA1         | ENSG00000184990 | 48    | 0.19 | 0.6  | 4.00E-05 | -0.41  | NA |
| chr14 | 21538006  | 21538665  | ARHGEF40      | ENSG00000165801 | -192  | 0.34 | 0.17 | 5.30E-05 | 0.17   | NA |
| chr14 | 36990873  | 36991209  | NKX2-1        | ENSG00000136352 | -687  | 0.58 | 0.22 | 7.20E-05 | 0.36   | NA |
| chr14 | 100437381 | 100438863 | EVL           | ENSG00000196405 | -29   | 0.32 | 0.2  | 0.00012  | 0.12   | NA |
| chr14 | 95237622  | 95238211  | GSC           | ENSG00000133937 | -1417 | 0.19 | 0.36 | 0.00013  | -0.18  | NA |
| chr14 | 58618291  | 58619220  | C14orf37      | ENSG00000139971 | 176   | 0.29 | 0.14 | 0.00015  | 0.15   | NA |
| chr14 | 51560116  | 51562487  | TRIM9         | ENSG00000100505 | 746   | 0.18 | 0.27 | 0.00016  | -0.094 | NA |
| chr14 | 104387580 | 104388036 | C14orf2       | ENSG00000156411 | 95    | 0.13 | 0.44 | 0.00016  | -0.31  | NA |
| chr14 | 100069475 | 100071813 | CCDC85C       | ENSG00000205476 | 83    | 0.23 | 0.15 | 0.00017  | 0.073  | NA |
| chr14 | 37049333  | 37051726  | NKX2-8        | ENSG00000136327 | 1283  | 0.24 | 0.16 | 0.00025  | 0.079  | NA |
| chr14 | 68066584  | 68067134  | PIGH          | ENSG00000100564 | 158   | 0.33 | 0.13 | 0.00032  | 0.21   | NA |
| chr14 | 101192851 | 101193499 | DLK1          | ENSG00000185559 | 11    | 0.43 | 0.27 | 0.00038  | 0.16   | NA |
| chr14 | 105189927 | 105190864 | ADSSL1        | ENSG00000185100 | -139  | 0.35 | 0.48 | 0.00038  | -0.13  | NA |
| chr14 | 37126786  | 37128274  | PAX9          | ENSG00000198807 | 757   | 0.27 | 0.17 | 0.00042  | 0.11   | NA |
| chr14 | 50234243  | 50235538  | KLHDC2        | ENSG00000165516 | 564   | 0.25 | 0.15 | 0.00042  | 0.092  | NA |
| chr14 | 51296727  | 51298477  | NIN           | ENSG00000100503 | -405  | 0.31 | 0.2  | 0.00047  | 0.12   | NA |
| chr14 | 77736733  | 77737772  | NGB           | ENSG00000165553 | 403   | 0.29 | 0.15 | 0.00047  | 0.14   | NA |
| chr14 | 37135513  | 37136348  | PAX9          | ENSG00000198807 | 732   | 0.4  | 0.23 | 0.00051  | 0.17   | NA |
| chr14 | 89258396  | 89259587  | EML5          | ENSG00000165521 | 105   | 0.26 | 0.16 | 0.00053  | 0.1    | NA |
| chr14 | 50100315  | 50102009  | C14orf104     | ENSG00000165506 | 786   | 0.25 | 0.17 | 0.00061  | 0.084  | NA |
| chr14 | 94253952  | 94255733  | PRIMA1        | ENSG00000175785 | -737  | 0.48 | 0.38 | 0.00063  | 0.1    | NA |
| chr14 | 37641232  | 37641879  | SLC25A21      | ENSG00000183032 | 310   | 0.17 | 0.3  | 0.00076  | -0.13  | NA |
| chr14 | 106333492 | 106333920 | IGHJ1P        | ENSG00000227335 | -1818 | 1    | 0.62 | 0.00079  | 0.38   | NA |
| chr14 | 23517223  | 23517741  | CDH24         | ENSG00000139880 | 1866  | 0.89 | 0.78 | 9.00E-04 | 0.11   | NA |
| chr14 | 36986362  | 36990576  | RP11-896J10.2 | ENSG00000253563 | -14   | 0.23 | 0.17 | 0.00091  | 0.055  | NA |
| chr14 | 65346111  | 65347346  | SPTB          | ENSG00000070182 | -173  | 0.27 | 0.16 | 0.00093  | 0.11   | NA |

|       |           |           |           |                 |      |      |      |        |        |    |
|-------|-----------|-----------|-----------|-----------------|------|------|------|--------|--------|----|
| chr14 | 55907197  | 55907433  | TBPL2     | ENSG00000182521 | 19   | 0.88 | 0.69 | 0.0011 | 0.19   | NA |
| chr14 | 60193831  | 60194302  | RTN1      | ENSG00000139970 | 365  | 0.91 | 0.99 | 0.0011 | -0.088 | NA |
| chr14 | 100625319 | 100626461 | DEGS2     | ENSG00000168350 | 122  | 0.19 | 0.13 | 0.0014 | 0.066  | NA |
| chr14 | 73358789  | 73360934  | DPF3      | ENSG00000205683 | -810 | 0.24 | 0.14 | 0.0016 | 0.1    | NA |
| chr14 | 36002598  | 36005013  | INSM2     | ENSG00000168348 | 557  | 0.21 | 0.16 | 0.0019 | 0.054  | NA |
| chr14 | 69658127  | 69658773  | EXD2      | ENSG00000081177 | 222  | 0.2  | 0.38 | 0.0019 | -0.18  | NA |
| chr14 | 24768620  | 24769364  | DHRS1     | ENSG00000157379 | -326 | 0.15 | 0.27 | 0.0022 | -0.12  | NA |
| chr14 | 58765173  | 58766386  | ARID4A    | ENSG00000032219 | 557  | 0.25 | 0.17 | 0.0023 | 0.084  | NA |
| chr14 | 73712288  | 73712911  | U6        | ENSG00000252839 | 989  | 0.69 | 0.56 | 0.0024 | 0.13   | NA |
| chr14 | 36277778  | 36278620  | RALGAPA1  | ENSG00000174373 | -59  | 0.1  | 0.46 | 0.0025 | -0.36  | NA |
| chr14 | 97263559  | 97264274  | VRK1      | ENSG00000100749 | 232  | 0.17 | 0.28 | 0.0025 | -0.12  | NA |
| chr14 | 103057926 | 103060044 | RCOR1     | ENSG00000089902 | -248 | 0.2  | 0.28 | 0.0029 | -0.083 | NA |
| chr14 | 35873047  | 35873990  | NFKBIA    | ENSG00000100906 | 434  | 0.23 | 0.12 | 0.003  | 0.11   | NA |
| chr14 | 62228974  | 62229268  | SNAPC1    | ENSG00000023608 | 28   | 0.34 | 1    | 0.0032 | -0.66  | NA |
| chr14 | 55518131  | 55518957  | MAPK1IP1L | ENSG00000168175 | 182  | 0.27 | 0.16 | 0.0033 | 0.11   | NA |
| chr14 | 24911411  | 24912119  | SDR39U1   | ENSG00000100445 | -106 | 0.28 | 0.52 | 0.0034 | -0.24  | NA |
| chr14 | 81686385  | 81687885  | GTF2A1    | ENSG00000165417 | 159  | 0.29 | 0.18 | 0.0035 | 0.11   | NA |
| chr14 | 77923870  | 77924596  | VIPAR     | ENSG00000151445 | -329 | 0.29 | 0.11 | 0.0043 | 0.18   | NA |
| chr14 | 101033876 | 101035229 | BEGAIN    | ENSG00000183092 | -145 | 0.27 | 0.18 | 0.0043 | 0.092  | NA |
| chr14 | 35098694  | 35099478  | SNX6      | ENSG00000129515 | 229  | 0.25 | 0.13 | 0.0048 | 0.12   | NA |
| chr14 | 68086277  | 68086957  | ARG2      | ENSG00000081181 | 38   | 0.25 | 0.14 | 0.005  | 0.11   | NA |
| chr14 | 106321750 | 106322002 | IGHM      | ENSG00000211899 | 447  | 0.85 | 0.99 | 0.0067 | -0.13  | NA |
| chr14 | 91883672  | 91885367  | CCDC88C   | ENSG00000015133 | -829 | 0.25 | 0.18 | 0.0068 | 0.071  | NA |
| chr14 | 69444639  | 69446826  | ACTN1     | ENSG00000072110 | -761 | 0.28 | 0.2  | 0.0079 | 0.074  | NA |
| chr14 | 88459118  | 88459689  | GALC      | ENSG00000054983 | 95   | 0.18 | 0.36 | 0.0087 | -0.18  | NA |
| chr14 | 35008526  | 35009049  | EAPP      | ENSG00000129518 | 156  | 0.33 | 0.18 | 0.0088 | 0.15   | NA |
| chr14 | 94640366  | 94641648  | PPP4R4    | ENSG00000119698 | 358  | 0.35 | 0.24 | 0.0088 | 0.11   | NA |
| chr14 | 105964988 | 105965304 | C14orf80  | ENSG00000185347 | 1183 | 0.83 | 0.94 | 0.0088 | -0.11  | NA |
| chr14 | 102771116 | 102771718 | RAGE      | ENSG00000080823 | 54   | 0.26 | 0.13 | 0.0092 | 0.13   | NA |
| chr14 | 56585042  | 56586234  | PELI2     | ENSG00000139946 | 545  | 0.23 | 0.15 | 0.0093 | 0.073  | NA |

|       |           |           |              |                 |      |      |      |        |        |    |
|-------|-----------|-----------|--------------|-----------------|------|------|------|--------|--------|----|
| chr14 | 69864713  | 69865073  | ERH          | ENSG00000100632 | 128  | 0.31 | 0.17 | 0.0093 | 0.15   | NA |
| chr14 | 55737940  | 55738999  | FBXO34       | ENSG00000178974 | 448  | 0.27 | 0.17 | 0.0099 | 0.1    | NA |
| chr14 | 93260307  | 93260924  | GOLGA5       | ENSG00000066455 | -35  | 0.19 | 0.12 | 0.01   | 0.07   | NA |
| chr14 | 105647469 | 105647827 | RP11-44N21.4 | ENSG00000257622 | -117 | 0.22 | 0.82 | 0.01   | -0.6   | NA |
| chr14 | 65878486  | 65880370  | FUT8         | ENSG00000033170 | -107 | 0.25 | 0.17 | 0.011  | 0.083  | NA |
| chr14 | 94547001  | 94547665  | DDX24        | ENSG00000089737 | 196  | 0.28 | 0.19 | 0.011  | 0.095  | NA |
| chr14 | 31926260  | 31926810  | RP11-176H8.1 | ENSG00000203546 | 47   | 0.32 | 0.19 | 0.012  | 0.13   | NA |
| chr14 | 101293427 | 101294433 | MEG3         | ENSG00000214548 | 182  | 0.66 | 0.48 | 0.012  | 0.18   | NA |
| chr14 | 50086955  | 50088261  | RPL36AL      | ENSG00000165502 | -247 | 0.14 | 0.2  | 0.013  | -0.062 | NA |
| chr14 | 50359340  | 50360797  | ARF6         | ENSG00000165527 | 258  | 0.18 | 0.29 | 0.013  | -0.1   | NA |
| chr14 | 104313161 | 104314990 | PPP1R13B     | ENSG00000088808 | -148 | 0.25 | 0.19 | 0.013  | 0.057  | NA |
| chr14 | 50998577  | 50999711  | MAP4K5       | ENSG00000012983 | 232  | 0.23 | 0.16 | 0.014  | 0.071  | NA |
| chr14 | 100149727 | 100151073 | CYP46A1      | ENSG00000036530 | -254 | 0.18 | 0.25 | 0.014  | -0.078 | NA |
| chr14 | 76044590  | 76045102  | AC007182.1   | ENSG00000119686 | -94  | 0.31 | 0.19 | 0.015  | 0.12   | NA |
| chr14 | 102829156 | 102829873 | CINP         | ENSG00000100865 | -261 | 0.18 | 0.11 | 0.015  | 0.062  | NA |
| chr14 | 81407710  | 81408133  | CEP128       | ENSG00000100629 | 110  | 0.22 | 0.64 | 0.017  | -0.42  | NA |
| chr14 | 93581083  | 93582797  | ITPK1        | ENSG00000100605 | 323  | 0.18 | 0.25 | 0.017  | -0.07  | NA |
| chr14 | 103851217 | 103852708 | MARK3        | ENSG00000075413 | 261  | 0.23 | 0.16 | 0.017  | 0.074  | NA |
| chr14 | 36295427  | 36296030  | BRMS1L       | ENSG00000100916 | 204  | 0.27 | 0.45 | 0.018  | -0.18  | NA |
| chr14 | 103995404 | 103995772 | TRMT61A      | ENSG00000166166 | 79   | 0.21 | 0.07 | 0.018  | 0.14   | NA |
| chr14 | 64931879  | 64932542  | AKAP5        | ENSG00000179841 | -7   | 0.29 | 0.2  | 0.019  | 0.096  | NA |
| chr14 | 101349372 | 101349860 | MIR127       | ENSG00000207608 | 300  | 0.99 | 0.93 | 0.019  | 0.059  | NA |
| chr14 | 48143433  | 48145589  | MDGA2        | ENSG00000139915 | -719 | 0.28 | 0.22 | 0.021  | 0.056  | NA |
| chr14 | 52780687  | 52781969  | PTGER2       | ENSG00000125384 | 215  | 0.19 | 0.26 | 0.021  | -0.067 | NA |
| chr14 | 64194241  | 64195049  | SGPP1        | ENSG00000126821 | 89   | 0.2  | 0.15 | 0.021  | 0.056  | NA |
| chr14 | 91975670  | 91977326  | SMEK1        | ENSG00000100796 | 146  | 0.22 | 0.3  | 0.021  | -0.08  | NA |
| chr14 | 105451903 | 105452561 | C14orf79     | ENSG00000140104 | 120  | 0.26 | 0.16 | 0.023  | 0.095  | NA |
| chr14 | 66974369  | 66976235  | GPHN         | ENSG00000171723 | 446  | 0.21 | 0.17 | 0.025  | 0.041  | NA |
| chr14 | 95623080  | 95624220  | DICER1       | ENSG00000100697 | -43  | 0.17 | 0.13 | 0.025  | 0.044  | NA |
| chr14 | 39639364  | 39639635  | TRAPPC6B     | ENSG00000182400 | 19   | 0.25 | 0.1  | 0.026  | 0.15   | NA |

|       |           |           |             |                 |       |      |      |       |        |    |
|-------|-----------|-----------|-------------|-----------------|-------|------|------|-------|--------|----|
| chr14 | 23425982  | 23426457  | HAUS4       | ENSG00000092036 | 78    | 0.25 | 0.17 | 0.027 | 0.083  | NA |
| chr14 | 45722148  | 45722802  | MIS18BP1    | ENSG00000129534 | -95   | 0.29 | 0.15 | 0.027 | 0.14   | NA |
| chr14 | 21492735  | 21494270  | NDRG2       | ENSG00000165795 | -283  | 0.17 | 0.25 | 0.029 | -0.08  | NA |
| chr14 | 51026872  | 51027570  | ATL1        | ENSG00000198513 | 405   | 0.38 | 0.19 | 0.03  | 0.19   | NA |
| chr14 | 77491938  | 77495276  | IRF2BPL     | ENSG00000119669 | 1427  | 0.18 | 0.22 | 0.03  | -0.036 | NA |
| chr14 | 24036399  | 24037076  | AP1G2       | ENSG00000213983 | -204  | 0.16 | 0.28 | 0.031 | -0.12  | NA |
| chr14 | 55595697  | 55596692  | LGALS3      | ENSG00000131981 | 259   | 0.31 | 0.23 | 0.031 | 0.08   | NA |
| chr14 | 45603373  | 45603906  | FKBP3       | ENSG00000100442 | 93    | 0.19 | 0.33 | 0.032 | -0.15  | NA |
| chr14 | 34419508  | 34420438  | EGLN3       | ENSG00000129521 | 59    | 0.34 | 0.25 | 0.034 | 0.087  | NA |
| chr14 | 70038108  | 70040302  | C14orf162   | ENSG00000255994 | -1173 | 0.93 | 0.9  | 0.034 | 0.026  | NA |
| chr14 | 75469315  | 75469882  | EIF2B2      | ENSG00000119718 | -14   | 0.29 | 0.18 | 0.034 | 0.11   | NA |
| chr14 | 77227569  | 77228691  | VASH1       | ENSG00000071246 | -105  | 0.18 | 0.27 | 0.036 | -0.091 | NA |
| chr14 | 105766558 | 105767996 | BRF1        | ENSG00000185024 | -472  | 0.19 | 0.15 | 0.037 | 0.043  | NA |
| chr14 | 54420184  | 54422958  | BMP4        | ENSG00000125378 | -301  | 0.25 | 0.2  | 0.038 | 0.052  | NA |
| chr14 | 64009645  | 64010525  | PPP2R5E     | ENSG00000154001 | 7     | 0.16 | 0.23 | 0.042 | -0.065 | NA |
| chr14 | 106916361 | 106916611 | AB019438.63 | ENSG00000228966 | 494   | 0.77 | 0.97 | 0.043 | -0.19  | NA |
| chr14 | 23815886  | 23816110  | SLC22A17    | ENSG00000092096 | 1432  | 0.97 | 0.81 | 0.048 | 0.16   | NA |
| chr14 | 60951976  | 60952946  | C14orf39    | ENSG00000179008 | 353   | 0.3  | 0.42 | 0.049 | -0.11  | NA |
| chr14 | 73392696  | 73393616  | DCAF4       | ENSG00000119599 | 116   | 0.19 | 0.3  | 0.049 | -0.1   | NA |
| chr14 | 24601498  | 24601700  | FITM1       | ENSG00000139914 | 1115  | 0.77 | 0.92 | 0.051 | -0.15  | NA |
| chr14 | 75894308  | 75895469  | JDP2        | ENSG00000140044 | 379   | 0.21 | 0.16 | 0.053 | 0.053  | NA |
| chr14 | 104583036 | 104584574 | MIR203      | ENSG00000207568 | 63    | 0.34 | 0.29 | 0.055 | 0.047  | NA |
| chr14 | 90526696  | 90528951  | KCNK13      | ENSG00000152315 | -285  | 0.19 | 0.22 | 0.059 | -0.037 | NA |
| chr14 | 20929157  | 20929708  | TMEM55B     | ENSG00000165782 | 160   | 0.24 | 0.17 | 0.06  | 0.067  | NA |
| chr14 | 105181017 | 105181450 | INF2        | ENSG00000203485 | -829  | 0.84 | 0.94 | 0.062 | -0.098 | NA |
| chr14 | 23755121  | 23755456  | HOMEZ       | ENSG00000215271 | 21    | 0.45 | 0.18 | 0.065 | 0.28   | NA |
| chr14 | 85999532  | 86000478  | FLRT2       | ENSG00000185070 | 461   | 0.2  | 0.15 | 0.065 | 0.057  | NA |
| chr14 | 105685452 | 105685733 | BRF1        | ENSG00000185024 | 873   | 0.86 | 0.96 | 0.067 | -0.1   | NA |
| chr14 | 21851498  | 21852550  | SUPT16H     | ENSG00000092201 | 401   | 0.25 | 0.16 | 0.068 | 0.089  | NA |
| chr14 | 53618865  | 53620039  | DDHD1       | ENSG00000100523 | 364   | 0.24 | 0.18 | 0.069 | 0.057  | NA |

|       |           |           |              |                 |       |      |      |       |        |    |
|-------|-----------|-----------|--------------|-----------------|-------|------|------|-------|--------|----|
| chr14 | 60975732  | 60978180  | SIX6         | ENSG00000184302 | 1087  | 0.27 | 0.22 | 0.069 | 0.052  | NA |
| chr14 | 74416857  | 74417358  | COQ6         | ENSG00000119723 | 151   | 0.27 | 0.19 | 0.07  | 0.08   | NA |
| chr14 | 92505998  | 92506811  | TRIP11       | ENSG00000100815 | -1    | 0.24 | 0.18 | 0.071 | 0.064  | NA |
| chr14 | 24657555  | 24658221  | IPO4         | ENSG00000196497 | 115   | 0.22 | 0.16 | 0.075 | 0.061  | NA |
| chr14 | 70345943  | 70346527  | SMOC1        | ENSG00000198732 | 92    | 0.1  | 0.29 | 0.076 | -0.19  | NA |
| chr14 | 104601959 | 104605672 | KIF26A       | ENSG00000066735 | -1245 | 0.25 | 0.21 | 0.077 | 0.035  | NA |
| chr14 | 24837872  | 24838324  | NFATC4       | ENSG00000100968 | -421  | 0.26 | 0.14 | 0.078 | 0.11   | NA |
| chr14 | 24898779  | 24899288  | KHNYN        | ENSG00000100441 | -108  | 0.26 | 0.11 | 0.083 | 0.14   | NA |
| chr14 | 60386271  | 60386750  | LRRC9        | ENSG00000131951 | 79    | 0.22 | 0.15 | 0.084 | 0.067  | NA |
| chr14 | 19720387  | 19720688  | RP11-496I2.5 | ENSG00000257573 | 58    | 0.6  | 1    | 0.085 | -0.4   | NA |
| chr14 | 105070518 | 105071463 | TMEM179      | ENSG00000189203 | 107   | 0.34 | 0.25 | 0.085 | 0.091  | NA |
| chr14 | 67878534  | 67879167  | PLEK2        | ENSG00000100558 | -22   | 0.25 | 0.17 | 0.087 | 0.079  | NA |
| chr14 | 100771820 | 100773673 | SLC25A29     | ENSG00000197119 | 32    | 0.25 | 0.2  | 0.088 | 0.047  | NA |
| chr14 | 65209843  | 65210089  | PLEKHG3      | ENSG00000126822 | 1652  | 0.98 | 0.93 | 0.089 | 0.05   | NA |
| chr14 | 78227054  | 78227575  | C14orf178    | ENSG00000197734 | 141   | 0.12 | 0.18 | 0.093 | -0.065 | NA |
| chr14 | 90863043  | 90864903  | CALM1        | ENSG00000198668 | 646   | 0.27 | 0.21 | 0.094 | 0.057  | NA |
| chr14 | 102973317 | 102976666 | ANKRD9       | ENSG00000156381 | 1137  | 0.52 | 0.56 | 0.097 | -0.046 | NA |
| chr14 | 56046634  | 56047986  | C14orf33     | ENSG00000186615 | -500  | 0.23 | 0.3  | 0.098 | -0.064 | NA |
| chr14 | 92302201  | 92303078  | TC2N         | ENSG00000165929 | 210   | 0.33 | 0.25 | 0.099 | 0.078  | NA |
| chr14 | 88851883  | 88852285  | SPATA7       | ENSG00000042317 | 96    | 0.19 | 0.12 | 0.1   | 0.069  | NA |
| chr14 | 23057921  | 23058359  | DAD1         | ENSG00000129562 | -77   | 0.3  | 0.18 | 0.11  | 0.11   | NA |
| chr14 | 23563978  | 23564724  | C14orf119    | ENSG00000179933 | 377   | 0.18 | 0.12 | 0.11  | 0.055  | NA |
| chr14 | 24563256  | 24563886  | PCK2         | ENSG00000100889 | 203   | 0.23 | 0.13 | 0.11  | 0.097  | NA |
| chr14 | 53019038  | 53020214  | TXNDC16      | ENSG00000087301 | -325  | 0.3  | 0.23 | 0.11  | 0.063  | NA |
| chr14 | 55031826  | 55035030  | SAMD4A       | ENSG00000020577 | -1207 | 0.24 | 0.2  | 0.11  | 0.038  | NA |
| chr14 | 89029178  | 89029938  | ZC3H14       | ENSG00000100722 | 305   | 0.17 | 0.13 | 0.11  | 0.04   | NA |
| chr14 | 91719576  | 91720228  | GPR68        | ENSG00000119714 | 265   | 0.19 | 0.26 | 0.11  | -0.072 | NA |
| chr14 | 102785930 | 102786538 | ZNF839       | ENSG00000022976 | 138   | 0.18 | 0.26 | 0.11  | -0.083 | NA |
| chr14 | 23526481  | 23527360  | CDH24        | ENSG00000139880 | -183  | 0.21 | 0.16 | 0.12  | 0.05   | NA |
| chr14 | 61447663  | 61448141  | TRMT5        | ENSG00000126814 | -120  | 0.19 | 0.32 | 0.12  | -0.12  | NA |

|       |           |           |           |                 |       |      |      |      |        |    |
|-------|-----------|-----------|-----------|-----------------|-------|------|------|------|--------|----|
| chr14 | 36991594  | 36992488  | NKX2-1    | ENSG00000136352 | -1687 | 0.37 | 0.25 | 0.13 | 0.12   | NA |
| chr14 | 60043242  | 60043594  | C14orf38  | ENSG00000151838 | 131   | 0.21 | 0.3  | 0.13 | -0.089 | NA |
| chr14 | 21537082  | 21537355  | ARHGEF40  | ENSG00000165801 | -1309 | 0.18 | 0.26 | 0.14 | -0.079 | NA |
| chr14 | 24711371  | 24712034  | TINF2     | ENSG00000092330 | 109   | 0.15 | 0.23 | 0.14 | -0.079 | NA |
| chr14 | 35761400  | 35761854  | PSMA6     | ENSG00000100902 | 64    | 0.32 | 0.23 | 0.14 | 0.09   | NA |
| chr14 | 61787880  | 61789467  | PRKCH     | ENSG00000027075 | 238   | 0.29 | 0.24 | 0.14 | 0.048  | NA |
| chr14 | 65016516  | 65016909  | C14orf50  | ENSG00000165807 | 92    | 0.3  | 0.22 | 0.14 | 0.076  | NA |
| chr14 | 67707753  | 67708647  | MPP5      | ENSG00000072415 | 179   | 0.31 | 0.26 | 0.14 | 0.06   | NA |
| chr14 | 73957750  | 73958889  | C14orf169 | ENSG00000255242 | 650   | 0.17 | 0.22 | 0.14 | -0.042 | NA |
| chr14 | 79745153  | 79746059  | NRXN3     | ENSG00000021645 | -48   | 0.35 | 0.22 | 0.14 | 0.13   | NA |
| chr14 | 103799809 | 103801661 | EIF5      | ENSG00000100664 | 242   | 0.17 | 0.2  | 0.14 | -0.033 | NA |
| chr14 | 24610406  | 24611158  | FAM158A   | ENSG00000100908 | -115  | 0.37 | 0.25 | 0.15 | 0.12   | NA |
| chr14 | 50065184  | 50066027  | LRR1      | ENSG00000165501 | 190   | 0.22 | 0.27 | 0.15 | -0.057 | NA |
| chr14 | 75422068  | 75422507  | PGF       | ENSG00000119630 | 4     | 0.14 | 0.19 | 0.15 | -0.052 | NA |
| chr14 | 102430636 | 102431898 | DYNC1H1   | ENSG00000197102 | 402   | 0.17 | 0.22 | 0.15 | -0.043 | NA |
| chr14 | 31494794  | 31496056  | AP4S1     | ENSG00000100478 | 568   | 0.27 | 0.22 | 0.16 | 0.054  | NA |
| chr14 | 35451634  | 35452544  | SRP54     | ENSG00000100883 | -15   | 0.23 | 0.35 | 0.16 | -0.12  | NA |
| chr14 | 50154754  | 50155239  | POLE2     | ENSG00000100479 | -61   | 0.29 | 0.24 | 0.16 | 0.057  | NA |
| chr14 | 73924588  | 73924980  | NUMB      | ENSG00000133961 | 441   | 0.19 | 0.32 | 0.16 | -0.14  | NA |
| chr14 | 85996494  | 85996958  | FLRT2     | ENSG00000185070 | 238   | 0.17 | 0.24 | 0.16 | -0.067 | NA |
| chr14 | 75348485  | 75349061  | DLST      | ENSG00000119689 | 179   | 0.17 | 0.24 | 0.17 | -0.065 | NA |
| chr14 | 94492639  | 94493297  | OTUB2     | ENSG00000089723 | 244   | 0.18 | 0.13 | 0.17 | 0.053  | NA |
| chr14 | 105622122 | 105622573 | JAG2      | ENSG00000184916 | 1799  | 0.76 | 0.83 | 0.17 | -0.071 | NA |
| chr14 | 24025006  | 24025577  | THTPA     | ENSG00000157306 | 93    | 0.22 | 0.14 | 0.18 | 0.078  | NA |
| chr14 | 54863423  | 54864254  | CDKN3     | ENSG00000100526 | 165   | 0.24 | 0.36 | 0.18 | -0.11  | NA |
| chr14 | 64760859  | 64761241  | ESR2      | ENSG00000140009 | 28    | 0.21 | 0.13 | 0.18 | 0.08   | NA |
| chr14 | 77563965  | 77564697  | KIAA1737  | ENSG00000198894 | -247  | 0.21 | 0.16 | 0.18 | 0.055  | NA |
| chr14 | 85997468  | 85998637  | FLRT2     | ENSG00000185070 | -1492 | 0.25 | 0.32 | 0.18 | -0.065 | NA |
| chr14 | 91282227  | 91282757  | TTC7B     | ENSG00000165914 | 269   | 0.23 | 0.18 | 0.18 | 0.054  | NA |
| chr14 | 93650745  | 93651652  | MOAP1     | ENSG00000165943 | 62    | 0.22 | 0.17 | 0.18 | 0.047  | NA |



|       |           |           |           |                 |      |      |      |      |        |    |
|-------|-----------|-----------|-----------|-----------------|------|------|------|------|--------|----|
| chr14 | 62161847  | 62163231  | HIF1A     | ENSG00000100644 | 308  | 0.21 | 0.17 | 0.19 | 0.039  | NA |
| chr14 | 77648108  | 77648328  | TMEM63C   | ENSG00000165548 | 116  | 0.22 | 0.11 | 0.19 | 0.1    | NA |
| chr14 | 93389245  | 93389899  | CHGA      | ENSG00000100604 | 127  | 0.22 | 0.18 | 0.19 | 0.046  | NA |
| chr14 | 21566540  | 21566822  | ZNF219    | ENSG00000165804 | 118  | 0.33 | 0.15 | 0.2  | 0.19   | NA |
| chr14 | 73704054  | 73705106  | PAPLN     | ENSG00000100767 | 375  | 0.23 | 0.19 | 0.2  | 0.034  | NA |
| chr14 | 74111560  | 74111766  | DNAL1     | ENSG00000119661 | 85   | 0.12 | 0.2  | 0.2  | -0.084 | NA |
| chr14 | 23305893  | 23307013  | MMP14     | ENSG00000157227 | -68  | 0.26 | 0.21 | 0.21 | 0.041  | NA |
| chr14 | 36983440  | 36983738  | SFTA3     | ENSG00000229415 | -599 | 0.28 | 0.4  | 0.21 | -0.13  | NA |
| chr14 | 39900676  | 39902206  | FBXO33    | ENSG00000165355 | 263  | 0.22 | 0.19 | 0.21 | 0.03   | NA |
| chr14 | 73602898  | 73603747  | PSEN1     | ENSG00000080815 | 167  | 0.21 | 0.17 | 0.21 | 0.034  | NA |
| chr14 | 75743683  | 75746798  | FOS       | ENSG00000170345 | -241 | 0.23 | 0.19 | 0.21 | 0.038  | NA |
| chr14 | 20881569  | 20881770  | TEP1      | ENSG00000129566 | -90  | 0.26 | 0.18 | 0.22 | 0.073  | NA |
| chr14 | 24838768  | 24838994  | NFATC4    | ENSG00000100968 | 362  | 1    | 0.91 | 0.22 | 0.093  | NA |
| chr14 | 105952603 | 105954296 | CRIP1     | ENSG00000213145 | 795  | 0.28 | 0.24 | 0.22 | 0.032  | NA |
| chr14 | 64319622  | 64320526  | SYNE2     | ENSG00000054654 | 391  | 0.25 | 0.22 | 0.23 | 0.034  | NA |
| chr14 | 74892466  | 74893184  | TMEM90A   | ENSG00000183379 | -20  | 0.29 | 0.4  | 0.23 | -0.11  | NA |
| chr14 | 105355854 | 105356084 | KIAA0284  | ENSG00000099814 | 1588 | 1    | 0.91 | 0.23 | 0.085  | NA |
| chr14 | 53257664  | 53258400  | GNPNAT1   | ENSG00000100522 | 287  | 0.22 | 0.29 | 0.24 | -0.076 | NA |
| chr14 | 64854203  | 64855024  | MTHFD1    | ENSG00000100714 | -136 | 0.15 | 0.23 | 0.24 | -0.078 | NA |
| chr14 | 23790212  | 23790659  | PABPN1    | ENSG00000100836 | -63  | 0.22 | 0.28 | 0.25 | -0.067 | NA |
| chr14 | 32545276  | 32547141  | ARHGAP5   | ENSG00000100852 | 19   | 0.21 | 0.24 | 0.25 | -0.029 | NA |
| chr14 | 60558340  | 60559176  | C14orf135 | ENSG00000126773 | 129  | 0.19 | 0.15 | 0.25 | 0.04   | NA |
| chr14 | 91883361  | 91883566  | CCDC88C   | ENSG00000015133 | 227  | 0.11 | 0.67 | 0.25 | -0.56  | NA |
| chr14 | 102227441 | 102228854 | PPP2R5C   | ENSG00000078304 | 12   | 0.27 | 0.23 | 0.25 | 0.039  | NA |
| chr14 | 60336951  | 60337461  | RTN1      | ENSG00000139970 | 264  | 0.27 | 0.2  | 0.26 | 0.066  | NA |
| chr14 | 65170876  | 65172007  | PLEKHG3   | ENSG00000126822 | 287  | 0.23 | 0.19 | 0.26 | 0.035  | NA |
| chr14 | 77843101  | 77843746  | TMED8     | ENSG00000100580 | -27  | 0.17 | 0.22 | 0.26 | -0.046 | NA |
| chr14 | 99736040  | 99737584  | BCL11B    | ENSG00000127152 | 753  | 0.19 | 0.23 | 0.26 | -0.033 | NA |
| chr14 | 65381075  | 65381382  | CHURC1    | ENSG00000258289 | 149  | 0.22 | 0.17 | 0.27 | 0.048  | NA |
| chr14 | 71373964  | 71375402  | PCNX      | ENSG00000100731 | 561  | 0.2  | 0.17 | 0.27 | 0.026  | NA |

|       |           |           |               |                 |       |      |      |      |        |    |
|-------|-----------|-----------|---------------|-----------------|-------|------|------|------|--------|----|
| chr14 | 105268485 | 105268763 | ZBTB42        | ENSG00000179627 | 1691  | 0.91 | 0.83 | 0.27 | 0.077  | NA |
| chr14 | 105332408 | 105332651 | KIAA0284      | ENSG00000099814 | 241   | 0.34 | 1    | 0.27 | -0.66  | NA |
| chr14 | 105615342 | 105615624 | JAG2          | ENSG00000184916 | -752  | 0.96 | 0.9  | 0.27 | 0.058  | NA |
| chr14 | 106936174 | 106936522 | IGHVIII-44    | ENSG00000253588 | -1949 | 0.86 | 0.76 | 0.27 | 0.11   | NA |
| chr14 | 20136633  | 20136959  | RP11-597A11.3 | ENSG00000257846 | -192  | 0.55 | 0.43 | 0.28 | 0.12   | NA |
| chr14 | 105486611 | 105487915 | CDCA4         | ENSG00000170779 | 162   | 0.24 | 0.2  | 0.28 | 0.041  | NA |
| chr14 | 21539711  | 21540045  | NDRG2         | ENSG00000165795 | -847  | 0.19 | 0.35 | 0.29 | -0.15  | NA |
| chr14 | 50319426  | 50319632  | NEMF          | ENSG00000165525 | -31   | 0.16 | 0.22 | 0.29 | -0.061 | NA |
| chr14 | 93813483  | 93814111  | COX8C         | ENSG00000187581 | 260   | 0.95 | 0.99 | 0.29 | -0.037 | NA |
| chr14 | 53417108  | 53418339  | FERMT2        | ENSG00000073712 | -86   | 0.19 | 0.23 | 0.3  | -0.039 | NA |
| chr14 | 78082584  | 78083250  | SPTLC2        | ENSG00000100596 | 193   | 0.19 | 0.16 | 0.3  | 0.032  | NA |
| chr14 | 105836031 | 105836386 | PACS2         | ENSG00000179364 | 1786  | 0.96 | 0.9  | 0.3  | 0.064  | NA |
| chr14 | 106066400 | 106067202 | AL928742.12   | ENSG00000227468 | -381  | 0.9  | 0.93 | 0.3  | -0.032 | NA |
| chr14 | 50697800  | 50698733  | SOS2          | ENSG00000100485 | -239  | 0.24 | 0.2  | 0.31 | 0.04   | NA |
| chr14 | 105614375 | 105614917 | JAG2          | ENSG00000184916 | 85    | 0.91 | 0.95 | 0.31 | -0.042 | NA |
| chr14 | 65438412  | 65439363  | RAB15         | ENSG00000139998 | -275  | 0.27 | 0.23 | 0.32 | 0.036  | NA |
| chr14 | 23398410  | 23398752  | PRMT5         | ENSG00000100462 | -16   | 0.13 | 0.19 | 0.33 | -0.059 | NA |
| chr14 | 47120868  | 47121159  | RPL10L        | ENSG00000165496 | 15    | 0.96 | 0.99 | 0.33 | -0.022 | NA |
| chr14 | 69950459  | 69951916  | PLEKHD1       | ENSG00000175985 | -284  | 0.34 | 0.3  | 0.33 | 0.039  | NA |
| chr14 | 23528360  | 23528582  | CDH24         | ENSG00000139880 | -1724 | 1    | 0.7  | 0.34 | 0.3    | NA |
| chr14 | 68140972  | 68141882  | VTI1B         | ENSG00000100568 | -88   | 0.21 | 0.24 | 0.34 | -0.028 | NA |
| chr14 | 76452079  | 76452542  | C14orf179     | ENSG00000119650 | 214   | 0.23 | 0.17 | 0.34 | 0.053  | NA |
| chr14 | 105940325 | 105941900 | CRIP2         | ENSG00000182809 | 625   | 0.18 | 0.21 | 0.34 | -0.027 | NA |
| chr14 | 35183385  | 35184196  | CFL2          | ENSG00000165410 | -7    | 0.22 | 0.18 | 0.35 | 0.046  | NA |
| chr14 | 38060841  | 38062119  | FOXA1         | ENSG00000129514 | 1981  | 0.23 | 0.2  | 0.35 | 0.033  | NA |
| chr14 | 23834435  | 23835947  | EFS           | ENSG00000100842 | -349  | 0.2  | 0.17 | 0.36 | 0.03   | NA |
| chr14 | 37131181  | 37132785  | PAX9          | ENSG00000198807 | 877   | 0.24 | 0.28 | 0.36 | -0.037 | NA |
| chr14 | 103987063 | 103989796 | CKB           | ENSG00000166165 | 741   | 0.17 | 0.19 | 0.36 | -0.021 | NA |
| chr14 | 58764507  | 58764961  | C14orf37      | ENSG00000139971 | 123   | 0.52 | 0.65 | 0.37 | -0.13  | NA |
| chr14 | 58862541  | 58863209  | TOMM20L       | ENSG00000196860 | 241   | 0.28 | 0.23 | 0.37 | 0.045  | NA |

|       |           |           |            |                 |      |      |      |      |        |    |
|-------|-----------|-----------|------------|-----------------|------|------|------|------|--------|----|
| chr14 | 90722855  | 90723302  | PSMC1      | ENSG00000100764 | 184  | 0.23 | 0.31 | 0.37 | -0.081 | NA |
| chr14 | 105261334 | 105261624 | AKT1       | ENSG00000142208 | 601  | 0.32 | 0.41 | 0.37 | -0.092 | NA |
| chr14 | 59950460  | 59951527  | C14orf149  | ENSG00000126790 | -269 | 0.21 | 0.19 | 0.38 | 0.021  | NA |
| chr14 | 23067443  | 23067773  | AL160314.1 | ENSG00000228313 | 247  | 0.22 | 0.13 | 0.39 | 0.089  | NA |
| chr14 | 23770512  | 23771902  | PPP1R3E    | ENSG00000235194 | 850  | 0.21 | 0.18 | 0.39 | 0.03   | NA |
| chr14 | 58711351  | 58711897  | PSMA3      | ENSG00000100567 | 75   | 0.21 | 0.28 | 0.39 | -0.067 | NA |
| chr14 | 103389016 | 103390248 | AMN        | ENSG00000166126 | 373  | 0.29 | 0.32 | 0.39 | -0.029 | NA |
| chr14 | 52117975  | 52119488  | FRMD6      | ENSG00000139926 | 155  | 0.18 | 0.15 | 0.4  | 0.026  | NA |
| chr14 | 57274607  | 57276840  | OTX2       | ENSG00000165588 | 1464 | 0.21 | 0.18 | 0.4  | 0.027  | NA |
| chr14 | 23298984  | 23299313  | SLC7A7     | ENSG00000155465 | -119 | 0.26 | 0.18 | 0.41 | 0.078  | NA |
| chr14 | 55493614  | 55494032  | WDHD1      | ENSG00000198554 | -54  | 0.22 | 0.18 | 0.41 | 0.041  | NA |
| chr14 | 73493461  | 73493970  | ZFYVE1     | ENSG00000165861 | 132  | 0.33 | 0.28 | 0.41 | 0.053  | NA |
| chr14 | 54955388  | 54955831  | GMFB       | ENSG00000197045 | 132  | 0.26 | 0.19 | 0.42 | 0.073  | NA |
| chr14 | 61114102  | 61116552  | SIX1       | ENSG00000126778 | 853  | 0.22 | 0.19 | 0.42 | 0.026  | NA |
| chr14 | 64969967  | 64972180  | ZBTB25     | ENSG00000089775 | -510 | 0.24 | 0.22 | 0.42 | 0.021  | NA |
| chr14 | 75593293  | 75594011  | NEK9       | ENSG00000119638 | -28  | 0.3  | 0.26 | 0.42 | 0.043  | NA |
| chr14 | 96000676  | 96001865  | SNHG10     | ENSG00000247092 | -61  | 0.22 | 0.2  | 0.42 | 0.029  | NA |
| chr14 | 23479310  | 23479532  | C14orf93   | ENSG00000100802 | -90  | 0.21 | 0.28 | 0.43 | -0.074 | NA |
| chr14 | 24605082  | 24605760  | PSME1      | ENSG00000092010 | 54   | 0.21 | 0.25 | 0.43 | -0.04  | NA |
| chr14 | 53173752  | 53174112  | PSMC6      | ENSG00000100519 | 42   | 0.25 | 0.21 | 0.43 | 0.047  | NA |
| chr14 | 24785147  | 24785869  | LTB4R      | ENSG00000213903 | 1602 | 0.29 | 0.33 | 0.44 | -0.048 | NA |
| chr14 | 52734207  | 52735486  | PTGDR      | ENSG00000168229 | 415  | 0.21 | 0.18 | 0.44 | 0.032  | NA |
| chr14 | 96857611  | 96858125  | AK7        | ENSG00000140057 | -580 | 0.17 | 0.2  | 0.44 | -0.036 | NA |
| chr14 | 24422770  | 24423141  | AL136419.1 | ENSG00000215256 | -79  | 0.57 | 0.63 | 0.45 | -0.054 | NA |
| chr14 | 59654630  | 59656330  | DAAM1      | ENSG00000100592 | 81   | 0.2  | 0.17 | 0.45 | 0.027  | NA |
| chr14 | 37666686  | 37667493  | MIPOL1     | ENSG00000151338 | -66  | 0.33 | 0.29 | 0.46 | 0.04   | NA |
| chr14 | 96968154  | 96969371  | PAPOLA     | ENSG00000090060 | 42   | 0.23 | 0.26 | 0.46 | -0.029 | NA |
| chr14 | 24701646  | 24701992  | GMPR2      | ENSG00000100938 | 171  | 0.18 | 0.23 | 0.47 | -0.058 | NA |
| chr14 | 64108343  | 64108952  | WDR89      | ENSG00000140006 | -522 | 0.17 | 0.21 | 0.47 | -0.047 | NA |
| chr14 | 24868163  | 24868590  | NYNRIN     | ENSG00000205978 | 384  | 0.21 | 0.24 | 0.48 | -0.036 | NA |

|       |           |           |               |                 |       |      |      |      |        |    |
|-------|-----------|-----------|---------------|-----------------|-------|------|------|------|--------|----|
| chr14 | 31676011  | 31677446  | HECTD1        | ENSG00000092148 | -39   | 0.22 | 0.19 | 0.48 | 0.025  | NA |
| chr14 | 74036127  | 74036662  | ACOT2         | ENSG00000119673 | 622   | 0.26 | 0.18 | 0.48 | 0.081  | NA |
| chr14 | 100704362 | 100707067 | YY1           | ENSG00000100811 | 392   | 0.19 | 0.2  | 0.48 | -0.017 | NA |
| chr14 | 104028308 | 104029671 | BAG5          | ENSG00000166170 | -375  | 0.18 | 0.21 | 0.48 | -0.026 | NA |
| chr14 | 29243403  | 29243763  | C14orf23      | ENSG00000186960 | 1582  | 0.31 | 0.36 | 0.49 | -0.055 | NA |
| chr14 | 58893618  | 58893953  | KIAA0586      | ENSG00000100578 | -318  | 0.24 | 0.19 | 0.49 | 0.057  | NA |
| chr14 | 77605885  | 77608304  | ZDHHC22       | ENSG00000177108 | 1040  | 0.2  | 0.18 | 0.49 | 0.02   | NA |
| chr14 | 100842339 | 100842931 | WARS          | ENSG00000140105 | 45    | 0.32 | 0.28 | 0.49 | 0.04   | NA |
| chr14 | 21077875  | 21078094  | RNASE11       | ENSG00000173464 | 59    | 0.2  | 0.24 | 0.5  | -0.039 | NA |
| chr14 | 37125219  | 37125661  | PAX9          | ENSG00000198807 | -1333 | 0.25 | 0.29 | 0.5  | -0.043 | NA |
| chr14 | 45553161  | 45553421  | AL121809.1    | ENSG00000249163 | -111  | 0.33 | 0.1  | 0.5  | 0.23   | NA |
| chr14 | 51410614  | 51411464  | PYGL          | ENSG00000100504 | 135   | 0.25 | 0.21 | 0.5  | 0.034  | NA |
| chr14 | 31028133  | 31028812  | G2E3          | ENSG00000092140 | 143   | 0.31 | 0.27 | 0.51 | 0.033  | NA |
| chr14 | 35342845  | 35344526  | BAZ1A         | ENSG00000198604 | 453   | 0.21 | 0.19 | 0.51 | 0.02   | NA |
| chr14 | 74318412  | 74318785  | PTGR2         | ENSG00000140043 | -23   | 0.27 | 0.22 | 0.51 | 0.052  | NA |
| chr14 | 74959680  | 74960907  | NPC2          | ENSG00000119655 | -309  | 0.17 | 0.19 | 0.51 | -0.024 | NA |
| chr14 | 31889168  | 31890024  | CTD-2213F21.2 | ENSG00000250365 | 104   | 0.17 | 0.19 | 0.52 | -0.02  | NA |
| chr14 | 60631740  | 60632254  | DHRS7         | ENSG00000100612 | 107   | 0.19 | 0.25 | 0.52 | -0.056 | NA |
| chr14 | 74058400  | 74059116  | ACOT4         | ENSG00000177465 | 348   | 0.19 | 0.21 | 0.52 | -0.025 | NA |
| chr14 | 102552721 | 102554068 | HSP90AA1      | ENSG00000080824 | 118   | 0.17 | 0.16 | 0.52 | 0.016  | NA |
| chr14 | 107221092 | 107221298 | IGHV3-74      | ENSG00000224650 | -1830 | 0.76 | 0.84 | 0.52 | -0.079 | NA |
| chr14 | 21978945  | 21979699  | METTL3        | ENSG00000165819 | 79    | 0.26 | 0.23 | 0.53 | 0.034  | NA |
| chr14 | 23821087  | 23822106  | SLC22A17      | ENSG00000092096 | -117  | 0.24 | 0.2  | 0.53 | 0.046  | NA |
| chr14 | 51338712  | 51339146  | ABHD12B       | ENSG00000131969 | 51    | 0.17 | 0.19 | 0.53 | -0.026 | NA |
| chr14 | 54907596  | 54908237  | CNIH          | ENSG00000100528 | 137   | 0.26 | 0.24 | 0.54 | 0.028  | NA |
| chr14 | 70655095  | 70656077  | SLC8A3        | ENSG00000100678 | 201   | 0.21 | 0.19 | 0.54 | 0.024  | NA |
| chr14 | 73925150  | 73925435  | NUMB          | ENSG00000133961 | -67   | 0.12 | 0.15 | 0.54 | -0.028 | NA |
| chr14 | 88789600  | 88790493  | KCNK10        | ENSG00000100433 | -453  | 0.22 | 0.2  | 0.54 | 0.021  | NA |
| chr14 | 54976311  | 54976995  | CGRRF1        | ENSG00000100532 | 29    | 0.2  | 0.25 | 0.55 | -0.045 | NA |
| chr14 | 69619828  | 69620458  | DCAF5         | ENSG00000139990 | -229  | 0.2  | 0.17 | 0.55 | 0.022  | NA |

|       |           |           |               |                 |       |      |      |      |        |    |
|-------|-----------|-----------|---------------|-----------------|-------|------|------|------|--------|----|
| chr14 | 105864480 | 105865465 | TEX22         | ENSG00000226174 | 56    | 0.25 | 0.23 | 0.55 | 0.023  | NA |
| chr14 | 91526233  | 91527552  | RPS6KA5       | ENSG00000100784 | -414  | 0.24 | 0.22 | 0.56 | 0.027  | NA |
| chr14 | 59104299  | 59105577  | DACT1         | ENSG00000165617 | 164   | 0.2  | 0.23 | 0.57 | -0.027 | NA |
| chr14 | 24641053  | 24642220  | REC8          | ENSG00000100918 | 534   | 0.24 | 0.21 | 0.58 | 0.026  | NA |
| chr14 | 60715365  | 60716759  | CTD-2184C24.2 | ENSG00000254718 | -579  | 0.16 | 0.17 | 0.58 | -0.017 | NA |
| chr14 | 23291689  | 23292278  | AL135998.1    | ENSG00000215306 | -233  | 0.29 | 0.34 | 0.59 | -0.054 | NA |
| chr14 | 75642864  | 75643376  | TMED10        | ENSG00000170348 | 229   | 0.22 | 0.18 | 0.59 | 0.037  | NA |
| chr14 | 99946161  | 99948188  | SETD3         | ENSG00000183576 | -49   | 0.2  | 0.22 | 0.59 | -0.017 | NA |
| chr14 | 76842506  | 76843846  | ESRRB         | ENSG00000119715 | 476   | 0.21 | 0.19 | 0.6  | 0.02   | NA |
| chr14 | 93673128  | 93673917  | UBR7          | ENSG0000012963  | 121   | 0.25 | 0.23 | 0.6  | 0.019  | NA |
| chr14 | 93798709  | 93799804  | BTBD7         | ENSG00000011114 | 129   | 0.21 | 0.19 | 0.6  | 0.016  | NA |
| chr14 | 55368547  | 55369913  | GCH1          | ENSG00000131979 | 250   | 0.19 | 0.21 | 0.61 | -0.018 | NA |
| chr14 | 55878302  | 55878681  | ATG14         | ENSG00000126775 | 85    | 0.19 | 0.22 | 0.61 | -0.034 | NA |
| chr14 | 61188116  | 61190772  | SIX4          | ENSG00000100625 | 1408  | 0.22 | 0.21 | 0.61 | 0.013  | NA |
| chr14 | 77786690  | 77787794  | POMT2         | ENSG00000009830 | -17   | 0.17 | 0.19 | 0.61 | -0.016 | NA |
| chr14 | 102226751 | 102227050 | PPP2R5C       | ENSG00000078304 | -1235 | 0.17 | 1    | 0.61 | -0.83  | NA |
| chr14 | 67999568  | 68000440  | PLEKHH1       | ENSG00000054690 | -4    | 0.19 | 0.17 | 0.62 | 0.021  | NA |
| chr14 | 74180518  | 74181264  | PNMA1         | ENSG00000176903 | 237   | 0.18 | 0.15 | 0.62 | 0.029  | NA |
| chr14 | 90422142  | 90422593  | TDP1          | ENSG00000042088 | 123   | 0.2  | 0.18 | 0.62 | 0.026  | NA |
| chr14 | 105956175 | 105958197 | C14orf80      | ENSG00000185347 | 994   | 0.21 | 0.23 | 0.62 | -0.013 | NA |
| chr14 | 24583268  | 24584243  | DCAF11        | ENSG00000100897 | -234  | 0.2  | 0.18 | 0.63 | 0.023  | NA |
| chr14 | 21737406  | 21738094  | HNRNPC        | ENSG00000092199 | -174  | 0.23 | 0.18 | 0.64 | 0.043  | NA |
| chr14 | 23340854  | 23341492  | LRP10         | ENSG00000197324 | -340  | 0.21 | 0.18 | 0.64 | 0.026  | NA |
| chr14 | 93689925  | 93690265  | RP11-85G20.1  | ENSG00000240096 | 390   | 0.94 | 0.96 | 0.64 | -0.018 | NA |
| chr14 | 24835810  | 24836220  | NFATC4        | ENSG00000100968 | -130  | 0.17 | 0.19 | 0.65 | -0.019 | NA |
| chr14 | 105451360 | 105451562 | C14orf79      | ENSG00000140104 | -651  | 0.98 | 0.89 | 0.65 | 0.088  | NA |
| chr14 | 88792904  | 88793324  | KCNK10        | ENSG00000100433 | 142   | 0.18 | 0.16 | 0.66 | 0.022  | NA |
| chr14 | 89017660  | 89017972  | PTPN21        | ENSG00000070778 | -850  | 0.25 | 0.22 | 0.66 | 0.033  | NA |
| chr14 | 105780339 | 105782027 | PACS2         | ENSG00000179364 | 431   | 0.23 | 0.22 | 0.66 | 0.013  | NA |
| chr14 | 96342209  | 96343570  | AL133167.1    | ENSG00000250366 | 160   | 0.2  | 0.21 | 0.67 | -0.012 | NA |

|       |           |           |            |                 |      |      |      |      |         |    |
|-------|-----------|-----------|------------|-----------------|------|------|------|------|---------|----|
| chr14 | 71108008  | 71109332  | AL357153.2 | ENSG00000245466 | -655 | 0.23 | 0.21 | 0.68 | 0.013   | NA |
| chr14 | 76448623  | 76449389  | TGFB3      | ENSG00000119699 | -914 | 0.16 | 0.18 | 0.68 | -0.021  | NA |
| chr14 | 100111120 | 100111906 | HHIPL1     | ENSG00000182218 | 33   | 0.15 | 0.17 | 0.68 | -0.021  | NA |
| chr14 | 21571835  | 21572520  | ZNF219     | ENSG00000165804 | 704  | 0.18 | 0.14 | 0.69 | 0.038   | NA |
| chr14 | 69726250  | 69728393  | GALNTL1    | ENSG00000100626 | 640  | 0.23 | 0.24 | 0.69 | -0.013  | NA |
| chr14 | 92572554  | 92573103  | ATXN3      | ENSG00000066427 | 78   | 0.2  | 0.22 | 0.69 | -0.025  | NA |
| chr14 | 78174054  | 78174550  | ALKBH1     | ENSG00000100601 | 54   | 0.18 | 0.21 | 0.7  | -0.028  | NA |
| chr14 | 105266444 | 105267838 | ZBTB42     | ENSG00000179627 | 208  | 0.18 | 0.19 | 0.7  | -0.0092 | NA |
| chr14 | 105330514 | 105332186 | KIAA0284   | ENSG00000099814 | -300 | 0.29 | 0.28 | 0.7  | 0.012   | NA |
| chr14 | 105820931 | 105821146 | PACS2      | ENSG00000179364 | -348 | 1    | 0.5  | 0.7  | 0.5     | NA |
| chr14 | 24740564  | 24740942  | RABGGTA    | ENSG00000100949 | -10  | 0.17 | 0.19 | 0.71 | -0.022  | NA |
| chr14 | 104181378 | 104182952 | XRCC3      | ENSG00000126215 | -371 | 0.27 | 0.25 | 0.71 | 0.014   | NA |
| chr14 | 20903395  | 20903720  | KLHL33     | ENSG00000185271 | 244  | 0.14 | 0.23 | 0.72 | -0.085  | NA |
| chr14 | 95785752  | 95786151  | CLMN       | ENSG00000165959 | 294  | 0.2  | 0.17 | 0.72 | 0.027   | NA |
| chr14 | 60097208  | 60097553  | RTN1       | ENSG00000139970 | -53  | 0.17 | 0.14 | 0.73 | 0.025   | NA |
| chr14 | 96829340  | 96830334  | ATG2B      | ENSG00000066739 | 370  | 0.25 | 0.26 | 0.73 | -0.014  | NA |
| chr14 | 23388092  | 23388857  | RBM23      | ENSG00000100461 | -116 | 0.39 | 0.6  | 0.74 | -0.21   | NA |
| chr14 | 23449886  | 23452174  | JUB        | ENSG00000129474 | 517  | 0.25 | 0.26 | 0.74 | -0.0097 | NA |
| chr14 | 73524989  | 73525752  | RBM25      | ENSG00000119707 | 226  | 0.31 | 0.34 | 0.74 | -0.032  | NA |
| chr14 | 105444319 | 105445225 | AHNAK2     | ENSG00000185567 | -78  | 0.21 | 0.19 | 0.74 | 0.015   | NA |
| chr14 | 19685063  | 19687329  | AL589743.2 | ENSG00000228294 | -194 | 0.77 | 0.73 | 0.75 | 0.034   | NA |
| chr14 | 21944914  | 21945812  | TOX4       | ENSG00000092203 | 449  | 0.32 | 0.29 | 0.75 | 0.029   | NA |
| chr14 | 65453387  | 65453998  | AL139022.1 | ENSG00000257365 | 254  | 0.19 | 0.22 | 0.75 | -0.026  | NA |
| chr14 | 77964571  | 77965670  | ISM2       | ENSG00000100593 | -111 | 0.18 | 0.19 | 0.75 | -0.01   | NA |
| chr14 | 39735802  | 39736902  | CTAGE5     | ENSG00000150527 | 24   | 0.19 | 0.21 | 0.76 | -0.014  | NA |
| chr14 | 69618336  | 69619091  | DCAF5      | ENSG00000139990 | 987  | 0.23 | 0.25 | 0.76 | -0.016  | NA |
| chr14 | 24664440  | 24665507  | TM9SF1     | ENSG00000100926 | -433 | 0.21 | 0.2  | 0.77 | 0.012   | NA |
| chr14 | 45431628  | 45432115  | FAM179B    | ENSG00000198718 | 429  | 0.14 | 0.16 | 0.77 | -0.027  | NA |
| chr14 | 76618138  | 76618452  | C14orf118  | ENSG00000089916 | 36   | 0.21 | 0.16 | 0.77 | 0.048   | NA |
| chr14 | 24802927  | 24803159  | ADCY4      | ENSG00000129467 | 910  | 0.14 | 0.16 | 0.78 | -0.021  | NA |

|       |           |           |               |                 |       |      |      |      |         |    |
|-------|-----------|-----------|---------------|-----------------|-------|------|------|------|---------|----|
| chr14 | 29236835  | 29237832  | FOXG1         | ENSG00000176165 | 1046  | 0.3  | 0.32 | 0.78 | -0.015  | NA |
| chr14 | 50778680  | 50779544  | L2HGDH        | ENSG00000087299 | -226  | 0.19 | 0.21 | 0.78 | -0.02   | NA |
| chr14 | 105930242 | 105931512 | MTA1          | ENSG00000182979 | -794  | 0.94 | 0.95 | 0.78 | -0.0076 | NA |
| chr14 | 52534581  | 52536722  | NID2          | ENSG00000087303 | 61    | 0.27 | 0.25 | 0.79 | 0.017   | NA |
| chr14 | 19614219  | 19614893  | CTD-2311B13.6 | ENSG00000257608 | 1328  | 0.7  | 0.68 | 0.8  | 0.023   | NA |
| chr14 | 19888058  | 19890323  | C14orf17      | ENSG00000215394 | -196  | 0.8  | 0.8  | 0.8  | 0.0061  | NA |
| chr14 | 100259160 | 100259542 | EML1          | ENSG00000066629 | -372  | 0.26 | 0.28 | 0.8  | -0.018  | NA |
| chr14 | 106188128 | 106188860 | AL901608.1    | ENSG00000258319 | -220  | 0.96 | 0.96 | 0.8  | 0.0094  | NA |
| chr14 | 74253387  | 74254188  | C14orf43      | ENSG00000156030 | 174   | 0.23 | 0.22 | 0.81 | 0.013   | NA |
| chr14 | 105559492 | 105560409 | RP11-44N21.1  | ENSG00000257556 | 4     | 0.21 | 0.23 | 0.81 | -0.014  | NA |
| chr14 | 23291078  | 23291337  | AL135998.1    | ENSG00000215306 | 543   | 0.98 | 0.96 | 0.82 | 0.027   | NA |
| chr14 | 29254365  | 29255069  | RP11-966I7.2  | ENSG00000257056 | 276   | 0.2  | 0.22 | 0.82 | -0.021  | NA |
| chr14 | 38067446  | 38069207  | FOXA1         | ENSG00000129514 | 919   | 0.25 | 0.24 | 0.82 | 0.01    | NA |
| chr14 | 24616322  | 24617115  | PSME2         | ENSG00000100911 | -288  | 0.19 | 0.18 | 0.83 | 0.011   | NA |
| chr14 | 38080239  | 38080678  | CTD-2058B24.1 | ENSG00000254868 | 2     | 0.35 | 0.31 | 0.83 | 0.043   | NA |
| chr14 | 74225626  | 74227209  | C14orf43      | ENSG00000156030 | 584   | 0.19 | 0.2  | 0.84 | -0.0088 | NA |
| chr14 | 105218366 | 105218620 | SIVA1         | ENSG00000184990 | -977  | 0.86 | 0.88 | 0.84 | -0.02   | NA |
| chr14 | 50863088  | 50863563  | CDKL1         | ENSG00000100490 | 274   | 0.17 | 0.19 | 0.85 | -0.019  | NA |
| chr14 | 52456128  | 52456593  | C14orf166     | ENSG00000087302 | 167   | 0.24 | 0.25 | 0.85 | -0.011  | NA |
| chr14 | 53196608  | 53197450  | STYX          | ENSG00000198252 | 146   | 0.2  | 0.18 | 0.85 | 0.019   | NA |
| chr14 | 57856944  | 57858351  | NAA30         | ENSG00000139977 | 376   | 0.19 | 0.18 | 0.85 | 0.0097  | NA |
| chr14 | 50159667  | 50160424  | KLHDC1        | ENSG00000197776 | 222   | 0.2  | 0.17 | 0.86 | 0.022   | NA |
| chr14 | 60973772  | 60974123  | SIX6          | ENSG00000184302 | -1922 | 0.26 | 0.3  | 0.86 | -0.037  | NA |
| chr14 | 65568454  | 65570009  | MAX           | ENSG00000125952 | -126  | 0.27 | 0.27 | 0.86 | -0.0069 | NA |
| chr14 | 76905703  | 76906057  | ESRRB         | ENSG00000119715 | -105  | 0.97 | 1    | 0.86 | -0.028  | NA |
| chr14 | 81999751  | 82000434  | SEL1L         | ENSG00000071537 | 113   | 0.27 | 0.24 | 0.86 | 0.029   | NA |
| chr14 | 102605597 | 102606977 | HSP90AA1      | ENSG00000080824 | -201  | 0.27 | 0.26 | 0.86 | 0.0081  | NA |
| chr14 | 58666567  | 58667198  | ACTR10        | ENSG00000131966 | 84    | 0.29 | 0.27 | 0.87 | 0.021   | NA |
| chr14 | 75760750  | 75761214  | AF111167.1    | ENSG00000119660 | 34    | 0.19 | 0.21 | 0.87 | -0.022  | NA |
| chr14 | 89290918  | 89291355  | TTC8          | ENSG00000165533 | 158   | 0.13 | 0.15 | 0.87 | -0.014  | NA |

|       |           |           |                |                 |      |      |      |      |         |    |
|-------|-----------|-----------|----------------|-----------------|------|------|------|------|---------|----|
| chr14 | 57046472  | 57046804  | C14orf101      | ENSG00000070269 | 127  | 0.26 | 0.32 | 0.88 | -0.055  | NA |
| chr14 | 74706188  | 74708192  | VSX2           | ENSG00000119614 | 1015 | 0.21 | 0.2  | 0.88 | 0.0037  | NA |
| chr14 | 105821482 | 105821768 | PACS2          | ENSG00000179364 | 239  | 0.79 | 0.67 | 0.88 | 0.12    | NA |
| chr14 | 24020002  | 24020251  | ZFHX2          | ENSG00000136367 | 641  | 0.18 | 0.15 | 0.89 | 0.03    | NA |
| chr14 | 53161838  | 53162780  | ERO1L          | ENSG00000197930 | 114  | 0.21 | 0.21 | 0.89 | 0.0055  | NA |
| chr14 | 75517717  | 75518224  | MLH3           | ENSG00000119684 | 265  | 0.23 | 0.22 | 0.89 | 0.012   | NA |
| chr14 | 24682402  | 24682837  | AL096870.1     | ENSG00000254505 | 19   | 0.21 | 0.5  | 0.9  | -0.29   | NA |
| chr14 | 71275512  | 71276571  | MAP3K9         | ENSG00000006432 | -153 | 0.19 | 0.18 | 0.9  | 0.0066  | NA |
| chr14 | 74485325  | 74486356  | ENTPD5         | ENSG00000187097 | 186  | 0.28 | 0.29 | 0.9  | -0.012  | NA |
| chr14 | 92587549  | 92589022  | NDUFB1         | ENSG00000183648 | -132 | 0.24 | 0.22 | 0.9  | 0.011   | NA |
| chr14 | 35515262  | 35515937  | FAM177A1       | ENSG00000151327 | 11   | 0.22 | 0.21 | 0.91 | 0.014   | NA |
| chr14 | 39572095  | 39572703  | SEC23A         | ENSG00000100934 | -120 | 0.27 | 0.28 | 0.91 | -0.012  | NA |
| chr14 | 75535825  | 75536376  | FAM164C        | ENSG00000119703 | 117  | 0.2  | 0.19 | 0.91 | 0.011   | NA |
| chr14 | 24438908  | 24439446  | DHRS4L2        | ENSG00000187630 | 29   | 0.08 | 0.08 | 0.92 | 0.0081  | NA |
| chr14 | 57735106  | 57735704  | EXOC5          | ENSG00000070367 | 150  | 0.2  | 0.21 | 0.92 | -0.0096 | NA |
| chr14 | 27066313  | 27066578  | NOVA1          | ENSG00000139910 | -157 | 0.33 | 0.14 | 0.94 | 0.19    | NA |
| chr14 | 92413581  | 92414324  | FBLN5          | ENSG00000140092 | 94   | 0.21 | 0.19 | 0.94 | 0.013   | NA |
| chr14 | 24520989  | 24521844  | LRRRC16B       | ENSG00000186648 | 210  | 0.23 | 0.24 | 0.95 | -0.007  | NA |
| chr14 | 32670417  | 32671092  | U6             | ENSG00000201654 | -497 | 0.23 | 0.22 | 0.95 | 0.0057  | NA |
| chr14 | 25518424  | 25519612  | STXBP6         | ENSG00000168952 | 77   | 0.17 | 0.16 | 0.96 | 0.0045  | NA |
| chr14 | 30396210  | 30397420  | PRKD1          | ENSG00000184304 | 33   | 0.25 | 0.26 | 0.96 | -0.0039 | NA |
| chr14 | 67981514  | 67982380  | TMEM229B       | ENSG00000198133 | 74   | 0.18 | 0.19 | 0.96 | -0.0053 | NA |
| chr14 | 75229927  | 75230531  | YLPM1          | ENSG00000119596 | 160  | 0.23 | 0.23 | 0.96 | 0.0074  | NA |
| chr14 | 64805109  | 64805785  | ESR2           | ENSG00000140009 | -179 | 0.19 | 0.21 | 0.97 | -0.014  | NA |
| chr14 | 62583679  | 62584279  | AL390816.1     | ENSG00000186369 | -218 | 0.18 | 0.18 | 0.98 | 0.0064  | NA |
| chr14 | 63512022  | 63512996  | KCNH5          | ENSG00000140015 | -336 | 0.23 | 0.24 | 0.98 | -0.0041 | NA |
| chr14 | 74769366  | 74769815  | ABCD4          | ENSG00000119688 | 47   | 0.22 | 0.21 | 0.99 | 0.0076  | NA |
| chr14 | 95234612  | 95236569  | GSC            | ENSG00000133937 | 909  | 0.23 | 0.23 | 0.99 | 0.0018  | NA |
| chr14 | 19422726  | 19423055  | RP11-536C10.11 | ENSG00000257731 | -192 | 0.79 | 0.8  | 1    | -0.0082 | NA |
| chr14 | 20922740  | 20924023  | OSGEP          | ENSG00000092094 | -447 | 0.18 | 0.17 | 1    | 0.0073  | NA |



|       |           |           |               |                 |       |      |      |   |         |    |
|-------|-----------|-----------|---------------|-----------------|-------|------|------|---|---------|----|
| chr14 | 21150918  | 21151224  | RNASE4        | ENSG00000181784 | -1301 | 0.2  | 0.19 | 1 | 0.0098  | NA |
| chr14 | 23235774  | 23236578  | OXA1L         | ENSG00000155463 | 292   | 0.2  | 0.2  | 1 | -0.0032 | NA |
| chr14 | 24020571  | 24021142  | ZFHX2         | ENSG00000136367 | -89   | 0.23 | 0.23 | 1 | -0.0044 | NA |
| chr14 | 24505567  | 24505796  | DHRS4L1       | ENSG00000225766 | -29   | 0.33 | 0.16 | 1 | 0.17    | NA |
| chr14 | 24550317  | 24551148  | NRL           | ENSG00000129535 | 405   | 0.19 | 0.19 | 1 | -0.0002 | NA |
| chr14 | 24803678  | 24804353  | ADCY4         | ENSG00000129467 | -62   | 0.23 | 0.22 | 1 | 0.0063  | NA |
| chr14 | 32672536  | 32672915  | U6            | ENSG00000202337 | -250  | 0.33 | 0.33 | 1 | -0.0038 | NA |
| chr14 | 38091469  | 38092176  | CTD-2058B24.1 | ENSG00000254868 | 552   | 0.15 | 0.25 | 1 | -0.1    | NA |
| chr14 | 39583458  | 39583701  | SIP1          | ENSG00000092208 | 90    | 0.2  | 0.25 | 1 | -0.05   | NA |
| chr14 | 39644344  | 39645022  | PNN           | ENSG00000100941 | 258   | 0.29 | 0.29 | 1 | -0.0012 | NA |
| chr14 | 45366387  | 45367108  | C14orf28      | ENSG00000179476 | 240   | 0.17 | 0.17 | 1 | -0.0041 | NA |
| chr14 | 45604969  | 45605475  | FANCM         | ENSG00000187790 | 86    | 0.27 | 0.17 | 1 | 0.1     | NA |
| chr14 | 55658232  | 55658550  | DLGAP5        | ENSG00000126787 | -129  | 1    | 1    | 1 | 0       | NA |
| chr14 | 56232945  | 56233281  | RPL13AP3      | ENSG00000177350 | 150   | 0.98 | 0.98 | 1 | 0.001   | NA |
| chr14 | 67826139  | 67827526  | ATP6V1D       | ENSG00000100554 | -241  | 0.21 | 0.21 | 1 | 0.0033  | NA |
| chr14 | 69259612  | 69262900  | ZFP36L1       | ENSG00000185650 | -1472 | 0.25 | 0.25 | 1 | -0.0009 | NA |
| chr14 | 70078317  | 70079077  | KIAA0247      | ENSG00000100647 | 387   | 0.26 | 0.27 | 1 | -0.0057 | NA |
| chr14 | 70233570  | 70234668  | SRSF5         | ENSG00000100650 | 290   | 0.17 | 0.17 | 1 | 0.003   | NA |
| chr14 | 74353202  | 74353831  | ZNF410        | ENSG00000119725 | 196   | 0.22 | 0.22 | 1 | -0.0032 | NA |
| chr14 | 75077317  | 75079596  | LTBP2         | ENSG00000119681 | 578   | 0.24 | 0.23 | 1 | 0.0013  | NA |
| chr14 | 75179629  | 75179875  | KIAA0317      | ENSG00000119682 | 18    | 0.16 | 0.14 | 1 | 0.024   | NA |
| chr14 | 75389712  | 75390133  | RPS6KL1       | ENSG00000198208 | -777  | 0.27 | 0.27 | 1 | -0.0014 | NA |
| chr14 | 76127255  | 76127914  | C14orf1       | ENSG00000133935 | -52   | 0.2  | 0.2  | 1 | 0.0044  | NA |
| chr14 | 77278573  | 77279409  | ANGEL1        | ENSG00000013523 | 292   | 0.22 | 0.22 | 1 | 0.0029  | NA |
| chr14 | 78266347  | 78266735  | ADCK1         | ENSG00000063761 | 115   | 0.24 | 0.23 | 1 | 0.0025  | NA |
| chr14 | 92040411  | 92040876  | C14orf184     | ENSG00000247097 | 313   | 0.15 | 0.2  | 1 | -0.051  | NA |
| chr14 | 92788913  | 92789204  | SLC24A4       | ENSG00000140090 | 133   | 1    | 1    | 1 | 0       | NA |
| chr14 | 92789494  | 92790712  | SLC24A4       | ENSG00000140090 | 566   | 0.2  | 0.2  | 1 | -0.0016 | NA |
| chr14 | 101292863 | 101293101 | MEG3          | ENSG00000214548 | 497   | 0.52 | 0.5  | 1 | 0.024   | NA |
| chr14 | 101348385 | 101348698 | MIR433        | ENSG00000207569 | 321   | 0.99 | 0.99 | 1 | 0.002   | NA |

|       |           |           |               |                 |       |      |      |          |         |    |
|-------|-----------|-----------|---------------|-----------------|-------|------|------|----------|---------|----|
| chr14 | 101531643 | 101532384 | MIR412        | ENSG00000199012 | 229   | 0.98 | 0.98 | 1        | -0.0041 | NA |
| chr14 | 103430534 | 103430787 | CDC42BPB      | ENSG00000198752 | 317   | 1    | 1    | 1        | 0       | NA |
| chr14 | 105155520 | 105156573 | INF2          | ENSG00000203485 | 103   | 0.25 | 0.24 | 1        | 0.001   | NA |
| chr14 | 105684955 | 105685159 | BRF1          | ENSG00000185024 | 1408  | 0.87 | 0.9  | 1        | -0.031  | NA |
| chr14 | 105915521 | 105915931 | MTA1          | ENSG00000182979 | 149   | 0.87 | 0.86 | 1        | 0.0029  | NA |
| chr14 | 105963578 | 105963808 | C14orf80      | ENSG00000185347 | -270  | 0.93 | 0.96 | 1        | -0.024  | NA |
| chr14 | 106138654 | 106139261 | ELK2AP        | ENSG00000213140 | 694   | 1    | 1    | 1        | 0       | NA |
| chr14 | 106743602 | 106743837 | AB019439.68   | ENSG00000238275 | 534   | 0.88 | 0.89 | 1        | -0.0058 | NA |
| chr14 | 106854805 | 106855153 | IGHV3-37      | ENSG00000253359 | -1953 | 0.96 | 1    | 1        | -0.043  | NA |
| chr14 | 19854718  | 19855019  | RP11-146E13.3 | ENSG00000258198 | 13    | NA   | 0.8  | NA       | NA      | NA |
| chr14 | 19960562  | 19961171  | RP11-146E13.6 | ENSG00000258363 | 1349  | 0.5  | NA   | NA       | NA      | NA |
| chr14 | 21458389  | 21458608  | METTL17       | ENSG00000165792 | 359   | 0.24 | NA   | NA       | NA      | NA |
| chr14 | 24457864  | 24458100  | DHRS4L2       | ENSG00000187630 | -45   | 1    | NA   | NA       | NA      | NA |
| chr14 | 35015567  | 35015911  | RNU1-7        | ENSG00000206596 | -181  | 1    | NA   | NA       | NA      | NA |
| chr14 | 38677154  | 38677787  | SSTR1         | ENSG00000139874 | 266   | 0.33 | NA   | NA       | NA      | NA |
| chr14 | 42075858  | 42076329  | LRFN5         | ENSG00000165379 | -680  | 0.67 | NA   | NA       | NA      | NA |
| chr14 | 50052650  | 50053033  | RPS29         | ENSG00000213741 | 253   | 0.32 | NA   | NA       | NA      | NA |
| chr14 | 70826255  | 70826580  | COX16         | ENSG00000133983 | 27    | 0.29 | NA   | NA       | NA      | NA |
| chr14 | 74004122  | 74004683  | ACOT1         | ENSG00000184227 | 584   | NA   | 0.14 | NA       | NA      | NA |
| chr14 | 74551326  | 74551706  | LIN52         | ENSG00000205659 | -140  | NA   | 0.5  | NA       | NA      | NA |
| chr14 | 81421294  | 81421561  | TSHR          | ENSG00000165409 | -282  | 0.33 | NA   | NA       | NA      | NA |
| chr14 | 90420900  | 90421175  | EFCAB11       | ENSG00000140025 | -9    | 0.31 | NA   | NA       | NA      | NA |
| chr14 | 90798164  | 90798394  | C14orf102     | ENSG00000119720 | 0     | 0.17 | NA   | NA       | NA      | NA |
| chr14 | 101292043 | 101292709 | MEG3          | ENSG00000214548 | -79   | 0.68 | NA   | NA       | NA      | NA |
| chr15 | 30114110  | 30115215  | TJP1          | ENSG00000104067 | 20    | 0.39 | 0.18 | 1.20E-08 | 0.21    | NA |
| chr15 | 29033878  | 29034710  | AC055876.1    | ENSG00000256951 | -51   | 0.95 | 0.4  | 1.30E-08 | 0.54    | NA |
| chr15 | 62359827  | 62360995  | C2CD4A        | ENSG00000198535 | 1235  | 0.32 | 0.16 | 2.60E-08 | 0.16    | NA |
| chr15 | 90357402  | 90358573  | ANPEP         | ENSG00000166825 | 107   | 0.44 | 0.24 | 5.00E-08 | 0.2     | NA |
| chr15 | 40763162  | 40764196  | CHST14        | ENSG00000169105 | 519   | 0.3  | 0.12 | 1.40E-07 | 0.18    | NA |
| chr15 | 63569296  | 63570100  | APH1B         | ENSG00000138613 | -51   | 0.41 | 0.19 | 2.00E-07 | 0.21    | NA |

|       |           |           |            |                 |       |      |      |          |       |    |
|-------|-----------|-----------|------------|-----------------|-------|------|------|----------|-------|----|
| chr15 | 67813370  | 67814181  | C15orf61   | ENSG00000189227 | 253   | 0.52 | 0.13 | 2.70E-07 | 0.39  | NA |
| chr15 | 76627523  | 76627838  | ISL2       | ENSG00000159556 | -1385 | 0.6  | 0.24 | 2.80E-07 | 0.35  | NA |
| chr15 | 91424576  | 91424837  | FURIN      | ENSG00000140564 | 1756  | 0.74 | 0.46 | 2.80E-07 | 0.28  | NA |
| chr15 | 100880957 | 100882438 | ADAMTS17   | ENSG00000140470 | 513   | 0.27 | 0.15 | 3.40E-07 | 0.12  | NA |
| chr15 | 84322322  | 84323771  | ADAMTSL3   | ENSG00000156218 | 208   | 0.39 | 0.21 | 4.60E-07 | 0.18  | NA |
| chr15 | 82335472  | 82339937  | AC026956.1 | ENSG00000222521 | 1069  | 0.24 | 0.35 | 6.50E-07 | -0.11 | NA |
| chr15 | 27112030  | 27113479  | GABRA5     | ENSG00000186297 | 481   | 0.29 | 0.16 | 9.40E-07 | 0.13  | NA |
| chr15 | 74218696  | 74220373  | LOXL1      | ENSG00000129038 | 742   | 0.45 | 0.31 | 1.40E-06 | 0.14  | NA |
| chr15 | 45722561  | 45722939  | C15orf48   | ENSG00000166920 | -13   | 0.69 | 0.42 | 1.50E-06 | 0.27  | NA |
| chr15 | 78799546  | 78800327  | AGPHD1     | ENSG00000188266 | 30    | 0.3  | 0.14 | 1.50E-06 | 0.16  | NA |
| chr15 | 76030564  | 76031664  | AC019294.4 | ENSG00000246877 | -150  | 0.35 | 0.17 | 1.70E-06 | 0.18  | NA |
| chr15 | 69109708  | 69114001  | ANP32A     | ENSG00000140350 | -1916 | 0.26 | 0.16 | 1.90E-06 | 0.095 | NA |
| chr15 | 76630029  | 76630970  | ISL2       | ENSG00000159556 | 1434  | 0.38 | 0.24 | 2.20E-06 | 0.14  | NA |
| chr15 | 78556405  | 78557542  | DNAJA4     | ENSG00000140403 | 545   | 0.44 | 0.27 | 2.30E-06 | 0.17  | NA |
| chr15 | 66083839  | 66084925  | DENND4A    | ENSG00000174485 | 249   | 0.39 | 0.12 | 3.40E-06 | 0.27  | NA |
| chr15 | 40986871  | 40987772  | RAD51      | ENSG00000051180 | 349   | 0.32 | 0.15 | 3.50E-06 | 0.18  | NA |
| chr15 | 58357309  | 58358776  | ALDH1A2    | ENSG00000128918 | -176  | 0.28 | 0.18 | 4.30E-06 | 0.1   | NA |
| chr15 | 48470007  | 48470628  | MYEF2      | ENSG00000104177 | 241   | 0.32 | 0.13 | 7.50E-06 | 0.18  | NA |
| chr15 | 63796129  | 63797638  | USP3       | ENSG00000140455 | 89    | 0.27 | 0.17 | 1.90E-05 | 0.098 | NA |
| chr15 | 99190446  | 99194559  | IGF1R      | ENSG00000140443 | 302   | 0.24 | 0.15 | 2.20E-05 | 0.087 | NA |
| chr15 | 83348839  | 83349865  | AP3B2      | ENSG00000103723 | -193  | 0.88 | 0.75 | 3.20E-05 | 0.13  | NA |
| chr15 | 80189006  | 80189695  | MTHFS      | ENSG00000136371 | 41    | 0.33 | 0.14 | 3.60E-05 | 0.2   | NA |
| chr15 | 31617763  | 31620908  | KLF13      | ENSG00000169926 | 277   | 0.25 | 0.17 | 4.80E-05 | 0.079 | NA |
| chr15 | 41165847  | 41166571  | RHOV       | ENSG00000104140 | 278   | 0.34 | 0.16 | 5.30E-05 | 0.18  | NA |
| chr15 | 63334233  | 63336063  | TPM1       | ENSG00000140416 | 317   | 0.35 | 0.21 | 6.90E-05 | 0.14  | NA |
| chr15 | 59225272  | 59226300  | SLTM       | ENSG00000137776 | -13   | 0.36 | 0.17 | 7.20E-05 | 0.19  | NA |
| chr15 | 72668041  | 72668658  | HEXA       | ENSG00000213614 | -164  | 0.37 | 0.17 | 7.50E-05 | 0.2   | NA |
| chr15 | 23931559  | 23932547  | NDN        | ENSG00000182636 | 397   | 0.41 | 0.74 | 7.90E-05 | -0.33 | NA |
| chr15 | 29967209  | 29967621  | AC022613.1 | ENSG00000256802 | 221   | 0.35 | 0.13 | 9.90E-05 | 0.23  | NA |
| chr15 | 75493982  | 75495331  | C15orf39   | ENSG00000167173 | 433   | 0.28 | 0.16 | 9.90E-05 | 0.12  | NA |

|       |          |          |            |                 |       |      |      |          |       |    |
|-------|----------|----------|------------|-----------------|-------|------|------|----------|-------|----|
| chr15 | 65116013 | 65116567 | PIF1       | ENSG00000140451 | 1577  | 0.39 | 0.15 | 0.00011  | 0.24  | NA |
| chr15 | 77197258 | 77197895 | SCAPER     | ENSG00000140386 | 168   | 0.33 | 0.18 | 0.00011  | 0.16  | NA |
| chr15 | 45814335 | 45815344 | SLC30A4    | ENSG00000104154 | 166   | 0.29 | 0.13 | 0.00012  | 0.16  | NA |
| chr15 | 69591246 | 69591754 | PAQR5      | ENSG00000137819 | 214   | 0.3  | 0.12 | 0.00013  | 0.18  | NA |
| chr15 | 64125514 | 64126665 | HERC1      | ENSG00000103657 | 58    | 0.31 | 0.17 | 0.00016  | 0.14  | NA |
| chr15 | 34629575 | 34630396 | SLC12A6    | ENSG00000140199 | -24   | 0.28 | 0.14 | 0.00019  | 0.14  | NA |
| chr15 | 83315116 | 83317541 | CPEB1      | ENSG00000214575 | 400   | 0.36 | 0.26 | 0.00019  | 0.1   | NA |
| chr15 | 74658038 | 74658574 | CYP11A1    | ENSG00000140459 | 193   | 0.33 | 0.18 | 2.00E-04 | 0.15  | NA |
| chr15 | 79237040 | 79237571 | CTSH       | ENSG00000103811 | 18    | 0.17 | 0.41 | 0.00021  | -0.24 | NA |
| chr15 | 66993543 | 66996571 | SMAD6      | ENSG00000137834 | 387   | 0.25 | 0.18 | 0.00022  | 0.074 | NA |
| chr15 | 66648784 | 66649178 | TIPIN      | ENSG00000075131 | 42    | 0.6  | 0.17 | 0.00023  | 0.43  | NA |
| chr15 | 75248277 | 75249922 | RPP25      | ENSG00000178718 | -145  | 0.29 | 0.21 | 0.00029  | 0.085 | NA |
| chr15 | 57025347 | 57026150 | ZNF280D    | ENSG00000137871 | 39    | 0.37 | 0.2  | 3.00E-04 | 0.18  | NA |
| chr15 | 70877380 | 70877958 | AC087699.1 | ENSG00000248804 | 1276  | 0.39 | 0.22 | 3.00E-04 | 0.17  | NA |
| chr15 | 45479509 | 45480498 | SHF        | ENSG00000138606 | 162   | 0.4  | 0.21 | 0.00035  | 0.19  | NA |
| chr15 | 34501701 | 34502499 | C15orf29   | ENSG00000134152 | 180   | 0.26 | 0.13 | 0.00047  | 0.13  | NA |
| chr15 | 69745049 | 69745746 | RPLP1      | ENSG00000137818 | 274   | 0.26 | 0.11 | 0.00052  | 0.15  | NA |
| chr15 | 38856262 | 38857658 | RASGRP1    | ENSG00000172575 | -124  | 0.31 | 0.19 | 0.00054  | 0.13  | NA |
| chr15 | 78632669 | 78633108 | CRABP1     | ENSG00000166426 | 70    | 0.42 | 0.2  | 0.00068  | 0.22  | NA |
| chr15 | 91478117 | 91478983 | AC068831.3 | ENSG00000224441 | -266  | 0.25 | 0.13 | 0.00068  | 0.11  | NA |
| chr15 | 60296135 | 60298520 | FOXB1      | ENSG00000171956 | 906   | 0.26 | 0.17 | 0.00069  | 0.084 | NA |
| chr15 | 74833241 | 74833961 | ARID3B     | ENSG00000179361 | 83    | 0.46 | 0.14 | 0.00069  | 0.31  | NA |
| chr15 | 81616253 | 81616963 | STARD5     | ENSG00000172345 | -126  | 0.32 | 0.18 | 7.00E-04 | 0.14  | NA |
| chr15 | 50474322 | 50475186 | SLC27A2    | ENSG00000140284 | 361   | 0.39 | 0.2  | 0.00082  | 0.19  | NA |
| chr15 | 43621830 | 43622953 | LCMT2      | ENSG00000168806 | 382   | 0.28 | 0.18 | 0.00093  | 0.11  | NA |
| chr15 | 89903446 | 89903720 | AC133637.1 | ENSG00000255571 | -1227 | 1    | 0.84 | 0.00095  | 0.16  | NA |
| chr15 | 68870633 | 68871974 | CORO2B     | ENSG00000103647 | -5    | 0.3  | 0.19 | 0.00096  | 0.11  | NA |
| chr15 | 43662605 | 43663666 | TUBGCP4    | ENSG00000137822 | -178  | 0.29 | 0.17 | 0.0011   | 0.12  | NA |
| chr15 | 59397270 | 59397749 | CCNB2      | ENSG00000157456 | 232   | 0.28 | 0.15 | 0.0011   | 0.14  | NA |
| chr15 | 68723367 | 68724691 | ITGA11     | ENSG00000137809 | 463   | 0.29 | 0.18 | 0.0011   | 0.11  | NA |

|       |          |          |            |                 |      |      |      |        |       |    |
|-------|----------|----------|------------|-----------------|------|------|------|--------|-------|----|
| chr15 | 40650055 | 40651102 | DISP2      | ENSG00000140323 | 142  | 0.33 | 0.16 | 0.0012 | 0.17  | NA |
| chr15 | 45421236 | 45422394 | DUOXA1     | ENSG00000140254 | 242  | 0.34 | 0.24 | 0.0012 | 0.1   | NA |
| chr15 | 92936677 | 92938521 | ST8SIA2    | ENSG00000140557 | 541  | 0.27 | 0.19 | 0.0012 | 0.089 | NA |
| chr15 | 55488742 | 55489294 | RSL24D1    | ENSG00000137876 | 247  | 0.37 | 0.19 | 0.0013 | 0.18  | NA |
| chr15 | 44719186 | 44720138 | CTDSPL2    | ENSG00000137770 | 230  | 0.18 | 0.35 | 0.0014 | -0.18 | NA |
| chr15 | 43802881 | 43803407 | TP53BP1    | ENSG00000067369 | -218 | 0.29 | 0.16 | 0.0016 | 0.14  | NA |
| chr15 | 66544432 | 66546134 | MEGF11     | ENSG00000157890 | 712  | 0.3  | 0.2  | 0.0017 | 0.096 | NA |
| chr15 | 41408059 | 41408856 | INO80      | ENSG00000128908 | -106 | 0.22 | 0.52 | 0.0019 | -0.3  | NA |
| chr15 | 45879274 | 45879918 | PLDN       | ENSG00000104164 | 179  | 0.26 | 0.15 | 0.0019 | 0.11  | NA |
| chr15 | 57883998 | 57884358 | GCOM1      | ENSG00000137878 | 72   | 0.21 | 0.11 | 0.0019 | 0.099 | NA |
| chr15 | 90545272 | 90545911 | ZNF710     | ENSG00000140548 | 967  | 0.5  | 0.14 | 0.002  | 0.36  | NA |
| chr15 | 78857725 | 78858269 | CHRNA5     | ENSG00000169684 | 135  | 0.26 | 0.12 | 0.0021 | 0.15  | NA |
| chr15 | 75165373 | 75165903 | SCAMP2     | ENSG00000140497 | 66   | 0.25 | 0.14 | 0.0022 | 0.11  | NA |
| chr15 | 48936810 | 48938577 | FBN1       | ENSG00000166147 | 213  | 0.29 | 0.2  | 0.0027 | 0.094 | NA |
| chr15 | 52587353 | 52588172 | MYO5C      | ENSG00000128833 | 203  | 0.26 | 0.15 | 0.0031 | 0.11  | NA |
| chr15 | 68346303 | 68347408 | PIAS1      | ENSG00000033800 | 283  | 0.26 | 0.19 | 0.0031 | 0.078 | NA |
| chr15 | 44486741 | 44487860 | FRMD5      | ENSG00000171877 | -62  | 0.25 | 0.16 | 0.0034 | 0.081 | NA |
| chr15 | 25200035 | 25201054 | SNRPN      | ENSG00000128739 | 470  | 0.39 | 0.56 | 0.0035 | -0.16 | NA |
| chr15 | 73925033 | 73925925 | NPTN       | ENSG00000156642 | 107  | 0.26 | 0.14 | 0.0036 | 0.12  | NA |
| chr15 | 65203730 | 65204392 | ANKDD1A    | ENSG00000166839 | -40  | 0.39 | 0.21 | 0.0044 | 0.17  | NA |
| chr15 | 34330569 | 34331478 | AVEN       | ENSG00000169857 | 354  | 0.24 | 0.14 | 0.0046 | 0.099 | NA |
| chr15 | 38364995 | 38365328 | AC087473.1 | ENSG00000236914 | -277 | 0.25 | 0.11 | 0.0046 | 0.13  | NA |
| chr15 | 55611085 | 55611608 | PIGB       | ENSG00000069943 | 213  | 0.17 | 0.34 | 0.0046 | -0.17 | NA |
| chr15 | 81071267 | 81073220 | KIAA1199   | ENSG00000103888 | 559  | 0.26 | 0.17 | 0.0046 | 0.093 | NA |
| chr15 | 89164376 | 89164952 | AEN        | ENSG00000181026 | 137  | 0.29 | 0.15 | 0.0046 | 0.13  | NA |
| chr15 | 62352227 | 62353092 | VPS13C     | ENSG00000129003 | -12  | 0.28 | 0.17 | 0.0048 | 0.12  | NA |
| chr15 | 90744131 | 90745323 | SEMA4B     | ENSG00000185033 | 165  | 0.18 | 0.35 | 0.0049 | -0.16 | NA |
| chr15 | 52471580 | 52472310 | GNB5       | ENSG00000069966 | 217  | 0.31 | 0.19 | 0.0054 | 0.12  | NA |
| chr15 | 55879792 | 55881228 | PYGO1      | ENSG00000171016 | -1   | 0.59 | 0.29 | 0.0056 | 0.3   | NA |
| chr15 | 39872527 | 39873567 | THBS1      | ENSG00000137801 | -80  | 0.37 | 0.21 | 0.0059 | 0.15  | NA |

|       |          |          |            |                 |      |      |      |        |        |    |
|-------|----------|----------|------------|-----------------|------|------|------|--------|--------|----|
| chr15 | 91260384 | 91260919 | BLM        | ENSG00000197299 | 93   | 0.43 | 0.23 | 0.0059 | 0.2    | NA |
| chr15 | 96873408 | 96877721 | NR2F2      | ENSG00000185551 | 1618 | 0.4  | 0.33 | 0.0062 | 0.066  | NA |
| chr15 | 76135311 | 76136946 | UBE2Q2     | ENSG00000140367 | 506  | 0.27 | 0.18 | 0.0065 | 0.085  | NA |
| chr15 | 27016892 | 27018943 | GABRB3     | ENSG00000166206 | 272  | 0.22 | 0.16 | 0.0066 | 0.063  | NA |
| chr15 | 65360024 | 65360542 | RASL12     | ENSG00000103710 | -23  | 0.21 | 0.32 | 0.0074 | -0.11  | NA |
| chr15 | 22891937 | 22893998 | CYFIP1     | ENSG00000068793 | 304  | 0.23 | 0.31 | 0.009  | -0.082 | NA |
| chr15 | 44955291 | 44955983 | SPG11      | ENSG00000104133 | 208  | 0.32 | 0.2  | 0.0095 | 0.12   | NA |
| chr15 | 72611946 | 72612802 | CELF6      | ENSG00000140488 | -246 | 0.25 | 0.16 | 0.0095 | 0.084  | NA |
| chr15 | 91537236 | 91538218 | PRC1       | ENSG00000198901 | 22   | 0.32 | 0.21 | 0.0095 | 0.1    | NA |
| chr15 | 63481449 | 63481975 | RAB8B      | ENSG00000166128 | 44   | 0.41 | 0.17 | 0.0097 | 0.24   | NA |
| chr15 | 57210226 | 57212005 | TCF12      | ENSG00000140262 | 792  | 0.25 | 0.19 | 0.011  | 0.058  | NA |
| chr15 | 76196103 | 76196950 | FBXO22     | ENSG00000167196 | 326  | 0.3  | 0.17 | 0.011  | 0.13   | NA |
| chr15 | 89010444 | 89011232 | MRPL46     | ENSG00000173867 | -188 | 0.21 | 0.39 | 0.011  | -0.18  | NA |
| chr15 | 42867337 | 42868254 | STARD9     | ENSG00000159433 | -62  | 0.34 | 0.2  | 0.012  | 0.14   | NA |
| chr15 | 67357339 | 67359061 | SMAD3      | ENSG00000166949 | 17   | 0.3  | 0.22 | 0.012  | 0.079  | NA |
| chr15 | 83620950 | 83621727 | HOMER2     | ENSG00000103942 | 135  | 0.3  | 0.16 | 0.012  | 0.14   | NA |
| chr15 | 44119074 | 44119277 | WDR76      | ENSG00000092470 | 14   | 0.58 | 0.17 | 0.013  | 0.41   | NA |
| chr15 | 65578613 | 65579490 | PARP16     | ENSG00000138617 | -221 | 0.27 | 0.18 | 0.014  | 0.086  | NA |
| chr15 | 65822685 | 65823540 | PTPLAD1    | ENSG00000074696 | 292  | 0.32 | 0.19 | 0.014  | 0.13   | NA |
| chr15 | 68569974 | 68571058 | FEM1B      | ENSG00000169018 | 375  | 0.31 | 0.21 | 0.014  | 0.1    | NA |
| chr15 | 43940866 | 43941702 | CATSPER2   | ENSG00000166762 | -261 | 0.96 | 0.9  | 0.016  | 0.06   | NA |
| chr15 | 88799522 | 88801017 | NTRK3      | ENSG00000140538 | -608 | 0.3  | 0.19 | 0.016  | 0.11   | NA |
| chr15 | 79381804 | 79384209 | RASGRF1    | ENSG00000058335 | 128  | 0.23 | 0.3  | 0.017  | -0.073 | NA |
| chr15 | 26874097 | 26874528 | GABRB3     | ENSG00000166206 | -75  | 0.97 | 0.9  | 0.018  | 0.07   | NA |
| chr15 | 75074425 | 75075146 | CSK        | ENSG00000103653 | 360  | 0.24 | 0.14 | 0.018  | 0.095  | NA |
| chr15 | 81281878 | 81282417 | MESDC2     | ENSG00000117899 | -8   | 0.21 | 0.32 | 0.018  | -0.1   | NA |
| chr15 | 57998704 | 57999385 | GRINL1A    | ENSG00000255529 | 217  | 0.19 | 0.31 | 0.019  | -0.11  | NA |
| chr15 | 65669310 | 65670617 | AC105129.1 | ENSG00000252907 | -202 | 0.26 | 0.19 | 0.019  | 0.066  | NA |
| chr15 | 75939504 | 75940831 | SNX33      | ENSG00000173548 | -80  | 0.23 | 0.17 | 0.02   | 0.061  | NA |
| chr15 | 52820333 | 52821639 | MYO5A      | ENSG00000197535 | 261  | 0.2  | 0.36 | 0.021  | -0.16  | NA |

|       |           |           |         |                 |       |      |      |       |       |    |
|-------|-----------|-----------|---------|-----------------|-------|------|------|-------|-------|----|
| chr15 | 94774615  | 94774979  | MCTP2   | ENSG00000140563 | 30    | 0.35 | 0.17 | 0.021 | 0.18  | NA |
| chr15 | 59949376  | 59949852  | GTF2A2  | ENSG00000140307 | 64    | 0.27 | 0.15 | 0.022 | 0.12  | NA |
| chr15 | 101791151 | 101792714 | CHSY1   | ENSG00000131873 | 205   | 0.22 | 0.16 | 0.024 | 0.055 | NA |
| chr15 | 77924568  | 77925988  | LINGO1  | ENSG00000169783 | -569  | 0.28 | 0.18 | 0.025 | 0.1   | NA |
| chr15 | 91642908  | 91643702  | SV2B    | ENSG00000185518 | 123   | 0.2  | 0.3  | 0.025 | -0.1  | NA |
| chr15 | 35838126  | 35838515  | ATPBD4  | ENSG00000134146 | 49    | 0.23 | 0.44 | 0.026 | -0.21 | NA |
| chr15 | 44116683  | 44117036  | MFAP1   | ENSG00000140259 | 141   | 0.27 | 0.53 | 0.026 | -0.26 | NA |
| chr15 | 29561494  | 29562143  | NDNL2   | ENSG00000185115 | 215   | 0.23 | 0.16 | 0.029 | 0.08  | NA |
| chr15 | 40211961  | 40213444  | GPR176  | ENSG00000166073 | 391   | 0.2  | 0.15 | 0.029 | 0.049 | NA |
| chr15 | 65066916  | 65068352  | RBPMS2  | ENSG00000166831 | 136   | 0.28 | 0.2  | 0.029 | 0.078 | NA |
| chr15 | 90792559  | 90792929  | TTL13   | ENSG00000213471 | -18   | 0.34 | 0.19 | 0.029 | 0.15  | NA |
| chr15 | 64443587  | 64444821  | SNX22   | ENSG00000157734 | 290   | 0.31 | 0.21 | 0.031 | 0.1   | NA |
| chr15 | 74725323  | 74726487  | SEMA7A  | ENSG00000138623 | 96    | 0.36 | 0.22 | 0.031 | 0.13  | NA |
| chr15 | 90543410  | 90543835  | ZNF710  | ENSG00000140548 | -1002 | 0.29 | 0.2  | 0.031 | 0.089 | NA |
| chr15 | 78832664  | 78833295  | PSMA4   | ENSG00000041357 | 232   | 0.36 | 0.17 | 0.036 | 0.19  | NA |
| chr15 | 59730070  | 59730738  | FAM81A  | ENSG00000157470 | 32    | 0.17 | 0.08 | 0.038 | 0.093 | NA |
| chr15 | 70387929  | 70393206  | TLE3    | ENSG00000140332 | -1506 | 0.27 | 0.22 | 0.038 | 0.046 | NA |
| chr15 | 63673888  | 63674160  | CA12    | ENSG00000074410 | 10    | 0.27 | 0.15 | 0.039 | 0.12  | NA |
| chr15 | 75018186  | 75019336  | CYP1A1  | ENSG00000140465 | -810  | 0.3  | 0.2  | 0.039 | 0.092 | NA |
| chr15 | 77223771  | 77224466  | RCN2    | ENSG00000117906 | 158   | 0.42 | 0.15 | 0.039 | 0.27  | NA |
| chr15 | 73976559  | 73977323  | CD276   | ENSG00000103855 | 217   | 0.46 | 0.25 | 0.04  | 0.2   | NA |
| chr15 | 41851723  | 41851970  | TYRO3   | ENSG00000092445 | 614   | 0.32 | 0.65 | 0.041 | -0.33 | NA |
| chr15 | 78423593  | 78424096  | CIB2    | ENSG00000136425 | 33    | 0.32 | 0.22 | 0.041 | 0.099 | NA |
| chr15 | 78912246  | 78913616  | CHRNA3  | ENSG00000080644 | 590   | 0.25 | 0.18 | 0.041 | 0.075 | NA |
| chr15 | 82824292  | 82825321  | RPS17   | ENSG00000184779 | 166   | 0.3  | 0.14 | 0.042 | 0.16  | NA |
| chr15 | 65809685  | 65810168  | DPP8    | ENSG00000074603 | 92    | 0.22 | 0.16 | 0.043 | 0.06  | NA |
| chr15 | 51914167  | 51915396  | DMXL2   | ENSG00000104093 | 168   | 0.33 | 0.18 | 0.044 | 0.15  | NA |
| chr15 | 92396013  | 92397682  | SLCO3A1 | ENSG00000176463 | -78   | 0.27 | 0.21 | 0.045 | 0.061 | NA |
| chr15 | 69222589  | 69223380  | SPESP1  | ENSG00000137808 | 145   | 0.49 | 0.6  | 0.046 | -0.11 | NA |
| chr15 | 75660388  | 75661060  | MAN2C1  | ENSG00000140400 | 217   | 0.27 | 0.17 | 0.046 | 0.1   | NA |

|       |           |           |            |                 |      |      |      |       |        |    |
|-------|-----------|-----------|------------|-----------------|------|------|------|-------|--------|----|
| chr15 | 33009530  | 33011696  | GREM1      | ENSG00000166923 | 438  | 0.22 | 0.17 | 0.047 | 0.047  | NA |
| chr15 | 60771068  | 60771558  | NARG2      | ENSG00000128915 | 31   | 0.33 | 0.11 | 0.047 | 0.22   | NA |
| chr15 | 28344188  | 28344489  | OCA2       | ENSG00000104044 | 101  | 0.19 | 0.43 | 0.049 | -0.24  | NA |
| chr15 | 42264156  | 42264861  | EHD4       | ENSG00000103966 | 268  | 0.38 | 0.2  | 0.051 | 0.19   | NA |
| chr15 | 63340256  | 63341464  | TPM1       | ENSG00000140416 | 261  | 0.2  | 0.14 | 0.051 | 0.054  | NA |
| chr15 | 101834943 | 101835946 | SNRPA1     | ENSG00000131876 | -56  | 0.43 | 0.51 | 0.051 | -0.076 | NA |
| chr15 | 77362740  | 77363560  | TSPAN3     | ENSG00000140391 | 301  | 0.27 | 0.18 | 0.052 | 0.089  | NA |
| chr15 | 69452451  | 69453939  | GLCE       | ENSG00000138604 | 222  | 0.3  | 0.24 | 0.054 | 0.062  | NA |
| chr15 | 72104191  | 72104418  | NR2E3      | ENSG00000031544 | 1410 | 0.82 | 0.95 | 0.054 | -0.13  | NA |
| chr15 | 90293221  | 90294733  | MESP1      | ENSG00000166823 | 564  | 0.26 | 0.17 | 0.054 | 0.086  | NA |
| chr15 | 90776699  | 90777636  | CIB1       | ENSG00000185043 | 112  | 0.24 | 0.17 | 0.054 | 0.068  | NA |
| chr15 | 71184276  | 71184689  | LRRC49     | ENSG00000137821 | -505 | 0.13 | 0.26 | 0.055 | -0.13  | NA |
| chr15 | 42120302  | 42120622  | JMJD7      | ENSG00000243789 | 157  | 0.25 | 0.16 | 0.057 | 0.089  | NA |
| chr15 | 49912985  | 49913482  | C15orf33   | ENSG00000166262 | -115 | 0.29 | 0.18 | 0.059 | 0.11   | NA |
| chr15 | 89910521  | 89912177  | MIR9-3     | ENSG00000207819 | 101  | 0.26 | 0.2  | 0.059 | 0.069  | NA |
| chr15 | 91427540  | 91427905  | FES        | ENSG00000182511 | 80   | 0.23 | 0.32 | 0.06  | -0.091 | NA |
| chr15 | 90644998  | 90646164  | IDH2       | ENSG00000182054 | 119  | 0.24 | 0.16 | 0.063 | 0.078  | NA |
| chr15 | 28982669  | 28983497  | WHAMML2    | ENSG00000248334 | 354  | 0.32 | 0.13 | 0.066 | 0.19   | NA |
| chr15 | 35046443  | 35047480  | GJD2       | ENSG00000159248 | -272 | 0.36 | 0.27 | 0.067 | 0.093  | NA |
| chr15 | 52043422  | 52044447  | LYSMD2     | ENSG00000140280 | -284 | 0.27 | 0.2  | 0.067 | 0.066  | NA |
| chr15 | 23207949  | 23208796  | WHAMML1    | ENSG00000187667 | -405 | 0.15 | 0.26 | 0.068 | -0.11  | NA |
| chr15 | 49338363  | 49338771  | SECISBP2L  | ENSG00000138593 | 63   | 0.26 | 0.17 | 0.069 | 0.09   | NA |
| chr15 | 100105368 | 100107065 | MEF2A      | ENSG00000068305 | 83   | 0.26 | 0.21 | 0.07  | 0.055  | NA |
| chr15 | 66678895  | 66679963  | MAP2K1     | ENSG00000169032 | 274  | 0.21 | 0.16 | 0.071 | 0.05   | NA |
| chr15 | 51200258  | 51201270  | AC021752.1 | ENSG00000247586 | 32   | 0.22 | 0.16 | 0.074 | 0.058  | NA |
| chr15 | 102501354 | 102502429 | WASH1      | ENSG00000185596 | 535  | 0.5  | 1    | 0.08  | -0.5   | NA |
| chr15 | 23033933  | 23034710  | NIPA2      | ENSG00000140157 | 87   | 0.28 | 0.17 | 0.082 | 0.11   | NA |
| chr15 | 59981234  | 59981795  | BNIP2      | ENSG00000140299 | -6   | 0.18 | 0.12 | 0.083 | 0.062  | NA |
| chr15 | 64679907  | 64680233  | TRIP4      | ENSG00000103671 | 67   | 0.36 | 0.21 | 0.083 | 0.15   | NA |
| chr15 | 89786998  | 89787691  | FANCI      | ENSG00000140525 | 164  | 0.18 | 0.32 | 0.083 | -0.14  | NA |



|       |           |           |            |                 |      |      |      |       |        |    |
|-------|-----------|-----------|------------|-----------------|------|------|------|-------|--------|----|
| chr15 | 44084144  | 44085272  | SERF2      | ENSG00000140264 | 180  | 0.26 | 0.17 | 0.088 | 0.096  | NA |
| chr15 | 102192165 | 102193345 | TM2D3      | ENSG00000184277 | -185 | 0.23 | 0.18 | 0.088 | 0.052  | NA |
| chr15 | 89877597  | 89878597  | POLG       | ENSG00000140521 | -19  | 0.23 | 0.15 | 0.089 | 0.076  | NA |
| chr15 | 65714742  | 65715571  | IGDCC4     | ENSG00000103742 | 254  | 0.2  | 0.13 | 0.092 | 0.068  | NA |
| chr15 | 20711403  | 20711823  | HERC2P3    | ENSG00000180229 | -199 | 1    | 0.5  | 0.093 | 0.5    | NA |
| chr15 | 75917646  | 75918212  | SNUPN      | ENSG00000169371 | 100  | 0.23 | 0.15 | 0.093 | 0.078  | NA |
| chr15 | 38544002  | 38545532  | SPRED1     | ENSG00000166068 | -285 | 0.27 | 0.21 | 0.095 | 0.061  | NA |
| chr15 | 55581772  | 55582571  | RAB27A     | ENSG00000069974 | -170 | 0.18 | 0.26 | 0.095 | -0.087 | NA |
| chr15 | 80215358  | 80216500  | C15orf37   | ENSG00000257028 | 422  | 0.27 | 0.19 | 0.095 | 0.079  | NA |
| chr15 | 64752626  | 64752850  | ZNF609     | ENSG00000180357 | -203 | 0.32 | 0.17 | 0.096 | 0.15   | NA |
| chr15 | 74906938  | 74908538  | CLK3       | ENSG00000179335 | 403  | 0.21 | 0.17 | 0.096 | 0.043  | NA |
| chr15 | 79724099  | 79725643  | KIAA1024   | ENSG00000169330 | 13   | 0.24 | 0.19 | 0.098 | 0.052  | NA |
| chr15 | 79102715  | 79104628  | MORF4L1    | ENSG00000185787 | 842  | 0.29 | 0.24 | 0.099 | 0.048  | NA |
| chr15 | 41793562  | 41795305  | ITPKA      | ENSG00000137825 | 796  | 0.35 | 0.3  | 0.1   | 0.054  | NA |
| chr15 | 79165102  | 79166057  | MORF4L1    | ENSG00000185787 | 407  | 0.24 | 0.19 | 0.1   | 0.055  | NA |
| chr15 | 101141975 | 101143137 | LINS       | ENSG00000140471 | -111 | 0.32 | 0.18 | 0.1   | 0.14   | NA |
| chr15 | 65369126  | 65370453  | KBTBD13    | ENSG00000234438 | 635  | 0.68 | 0.62 | 0.11  | 0.053  | NA |
| chr15 | 75229782  | 75230660  | COX5A      | ENSG00000178741 | 288  | 0.27 | 0.2  | 0.11  | 0.063  | NA |
| chr15 | 23157794  | 23158624  | AC138649.1 | ENSG00000230856 | -52  | 0.4  | 0.26 | 0.12  | 0.14   | NA |
| chr15 | 25683348  | 25684415  | UBE3A      | ENSG00000114062 | 247  | 0.2  | 0.29 | 0.12  | -0.086 | NA |
| chr15 | 40861411  | 40862115  | RPUSD2     | ENSG00000166133 | 264  | 0.14 | 0.21 | 0.12  | -0.07  | NA |
| chr15 | 43477588  | 43477816  | CCNDBP1    | ENSG00000166946 | 65   | 0.35 | 0.18 | 0.12  | 0.17   | NA |
| chr15 | 49254984  | 49255564  | SHC4       | ENSG00000185634 | 367  | 0.34 | 0.23 | 0.12  | 0.11   | NA |
| chr15 | 50716321  | 50716826  | USP8       | ENSG00000138592 | -6   | 0.34 | 0.25 | 0.12  | 0.091  | NA |
| chr15 | 59279741  | 59280720  | RNF111     | ENSG00000157450 | 368  | 0.24 | 0.16 | 0.12  | 0.076  | NA |
| chr15 | 63413918  | 63414852  | LACTB      | ENSG00000103642 | 386  | 0.21 | 0.15 | 0.12  | 0.061  | NA |
| chr15 | 69366321  | 69366796  | NCRNA00277 | ENSG00000212766 | 1292 | 0.28 | 0.15 | 0.12  | 0.13   | NA |
| chr15 | 79576059  | 79576270  | ANKRD34C   | ENSG00000235711 | 1018 | 0.26 | 0.17 | 0.12  | 0.089  | NA |
| chr15 | 80696076  | 80697393  | ARNT2      | ENSG00000172379 | 42   | 0.27 | 0.21 | 0.12  | 0.06   | NA |
| chr15 | 85197232  | 85197695  | WDR73      | ENSG00000177082 | 58   | 0.41 | 0.28 | 0.12  | 0.13   | NA |

|       |           |           |            |                 |      |      |      |      |       |    |
|-------|-----------|-----------|------------|-----------------|------|------|------|------|-------|----|
| chr15 | 99645030  | 99646444  | SYNM       | ENSG00000182253 | 451  | 0.29 | 0.18 | 0.12 | 0.11  | NA |
| chr15 | 34393814  | 34394264  | C15orf24   | ENSG00000134153 | -31  | 0.31 | 0.21 | 0.13 | 0.1   | NA |
| chr15 | 38746274  | 38746785  | FAM98B     | ENSG00000171262 | 201  | 0.3  | 0.22 | 0.13 | 0.082 | NA |
| chr15 | 41576041  | 41576536  | AC012652.1 | ENSG00000247556 | 85   | 0.33 | 0.14 | 0.13 | 0.19  | NA |
| chr15 | 49170144  | 49170710  | SHC4       | ENSG00000185634 | -176 | 0.27 | 0.18 | 0.13 | 0.086 | NA |
| chr15 | 59041081  | 59042283  | ADAM10     | ENSG00000137845 | -517 | 0.26 | 0.21 | 0.13 | 0.048 | NA |
| chr15 | 85360192  | 85360574  | ALPK3      | ENSG00000136383 | 472  | 0.36 | 0.28 | 0.13 | 0.081 | NA |
| chr15 | 42565452  | 42565791  | TMEM87A    | ENSG00000103978 | 17   | 0.29 | 0.53 | 0.14 | -0.25 | NA |
| chr15 | 43212416  | 43213601  | TTBK2      | ENSG00000128881 | -96  | 0.28 | 0.18 | 0.14 | 0.099 | NA |
| chr15 | 75870802  | 75871814  | PTPN9      | ENSG00000169410 | 322  | 0.27 | 0.21 | 0.14 | 0.064 | NA |
| chr15 | 101389732 | 101390260 | AC015712.1 | ENSG00000232386 | -40  | 0.38 | 0.28 | 0.14 | 0.1   | NA |
| chr15 | 40886396  | 40886918  | CASC5      | ENSG00000137812 | 210  | 0.21 | 0.34 | 0.15 | -0.13 | NA |
| chr15 | 50978343  | 50979199  | TRPM7      | ENSG00000092439 | 241  | 0.21 | 0.16 | 0.15 | 0.05  | NA |
| chr15 | 62456015  | 62457648  | C2CD4B     | ENSG00000205502 | 651  | 0.25 | 0.21 | 0.15 | 0.043 | NA |
| chr15 | 83775861  | 83776922  | TM6SF1     | ENSG00000136404 | 232  | 0.24 | 0.2  | 0.15 | 0.043 | NA |
| chr15 | 84115762  | 84116921  | SH3GL3     | ENSG00000140600 | 361  | 0.25 | 0.19 | 0.15 | 0.054 | NA |
| chr15 | 30113705  | 30113940  | TJP1       | ENSG00000104067 | -71  | 0.33 | 0.15 | 0.16 | 0.18  | NA |
| chr15 | 35280393  | 35280837  | ZNF770     | ENSG00000198146 | -141 | 0.2  | 0.14 | 0.16 | 0.063 | NA |
| chr15 | 45315201  | 45315543  | SORD       | ENSG00000140263 | 67   | 0.44 | 0.26 | 0.16 | 0.18  | NA |
| chr15 | 48009418  | 48011044  | SEMA6D     | ENSG00000137872 | 647  | 0.22 | 0.28 | 0.16 | -0.06 | NA |
| chr15 | 65689142  | 65689362  | IGDCC4     | ENSG00000103742 | -565 | 0.84 | 0.33 | 0.16 | 0.51  | NA |
| chr15 | 68115485  | 68122575  | SKOR1      | ENSG00000188779 | 1089 | 0.28 | 0.25 | 0.16 | 0.027 | NA |
| chr15 | 78730095  | 78731105  | IREB2      | ENSG00000136381 | 69   | 0.35 | 0.19 | 0.16 | 0.17  | NA |
| chr15 | 85113435  | 85114361  | UBE2Q2P1   | ENSG00000189136 | 128  | 0.21 | 0.15 | 0.16 | 0.06  | NA |
| chr15 | 90818314  | 90818601  | AC091167.2 | ENSG00000228998 | 191  | 0.97 | 0.93 | 0.16 | 0.042 | NA |
| chr15 | 83478366  | 83479273  | WHAMM      | ENSG00000156232 | 846  | 0.25 | 0.19 | 0.18 | 0.057 | NA |
| chr15 | 41055396  | 41056787  | GCHFR      | ENSG00000137880 | -127 | 0.29 | 0.22 | 0.19 | 0.068 | NA |
| chr15 | 41953823  | 41954338  | MGA        | ENSG00000174197 | 1470 | 0.25 | 0.44 | 0.19 | -0.19 | NA |
| chr15 | 49447339  | 49447576  | COPS2      | ENSG00000166200 | 344  | 0.09 | 0.2  | 0.19 | -0.11 | NA |
| chr15 | 34659475  | 34659970  | LPCAT4     | ENSG00000176454 | -327 | 0.22 | 0.15 | 0.2  | 0.08  | NA |

|       |          |          |              |                 |       |      |      |      |        |    |
|-------|----------|----------|--------------|-----------------|-------|------|------|------|--------|----|
| chr15 | 52311220 | 52312180 | MAPK6        | ENSG00000069956 | 283   | 0.23 | 0.28 | 0.2  | -0.043 | NA |
| chr15 | 59663863 | 59665081 | MYO1E        | ENSG00000157483 | 599   | 0.26 | 0.21 | 0.2  | 0.043  | NA |
| chr15 | 75315855 | 75316178 | PPCDC        | ENSG00000138621 | 120   | 0.36 | 0.17 | 0.2  | 0.19   | NA |
| chr15 | 83735240 | 83736089 | BTBD1        | ENSG00000064726 | 442   | 0.23 | 0.19 | 0.2  | 0.044  | NA |
| chr15 | 72522131 | 72524238 | PKM2         | ENSG00000067225 | 347   | 0.24 | 0.2  | 0.21 | 0.031  | NA |
| chr15 | 72564442 | 72565165 | PARP6        | ENSG00000137817 | -1175 | 0.21 | 0.16 | 0.21 | 0.054  | NA |
| chr15 | 22833282 | 22833911 | TUBGCP5      | ENSG00000153575 | 201   | 0.23 | 0.18 | 0.23 | 0.051  | NA |
| chr15 | 52404191 | 52404978 | BCL2L10      | ENSG00000137875 | 388   | 0.23 | 0.19 | 0.23 | 0.038  | NA |
| chr15 | 64338152 | 64338886 | DAPK2        | ENSG00000035664 | 2     | 0.25 | 0.19 | 0.23 | 0.06   | NA |
| chr15 | 78933187 | 78933821 | CHRNB4       | ENSG00000117971 | 83    | 0.41 | 0.32 | 0.23 | 0.093  | NA |
| chr15 | 82554785 | 82555476 | EFTUD1       | ENSG00000140598 | -26   | 0.17 | 0.21 | 0.23 | -0.039 | NA |
| chr15 | 21967418 | 21968306 | AC068446.2   | ENSG00000247765 | 289   | 0.5  | 0.65 | 0.24 | -0.15  | NA |
| chr15 | 66161549 | 66162593 | RAB11A       | ENSG00000103769 | 275   | 0.2  | 0.15 | 0.24 | 0.051  | NA |
| chr15 | 89904822 | 89906050 | AC133637.1   | ENSG00000255571 | 626   | 0.21 | 0.16 | 0.24 | 0.05   | NA |
| chr15 | 41135719 | 41137210 | SPINT1       | ENSG00000166145 | 223   | 0.21 | 0.17 | 0.26 | 0.034  | NA |
| chr15 | 31195673 | 31196392 | FAN1         | ENSG00000198690 | -44   | 0.21 | 0.15 | 0.27 | 0.057  | NA |
| chr15 | 43425772 | 43426263 | TMEM62       | ENSG00000137842 | 295   | 0.26 | 0.18 | 0.27 | 0.081  | NA |
| chr15 | 44038504 | 44039122 | PDIA3        | ENSG00000167004 | 223   | 0.24 | 0.17 | 0.27 | 0.064  | NA |
| chr15 | 65321431 | 65321996 | MTFMT        | ENSG00000103707 | 264   | 0.19 | 0.12 | 0.27 | 0.075  | NA |
| chr15 | 73343779 | 73345369 | NEO1         | ENSG00000067141 | -251  | 0.26 | 0.23 | 0.27 | 0.037  | NA |
| chr15 | 80987196 | 80988664 | FAM108C1     | ENSG00000136379 | 278   | 0.24 | 0.2  | 0.27 | 0.04   | NA |
| chr15 | 37782884 | 37783121 | RP11-25H11.1 | ENSG00000243122 | 110   | 1    | 0.94 | 0.28 | 0.061  | NA |
| chr15 | 42840462 | 42841116 | LRRC57       | ENSG00000180979 | 211   | 0.28 | 0.19 | 0.28 | 0.091  | NA |
| chr15 | 71054898 | 71056230 | UACA         | ENSG00000137831 | 205   | 0.22 | 0.25 | 0.28 | -0.037 | NA |
| chr15 | 74284252 | 74284821 | STOML1       | ENSG00000067221 | 28    | 0.39 | 0.26 | 0.28 | 0.13   | NA |
| chr15 | 98503534 | 98504649 | ARRDC4       | ENSG00000140450 | 163   | 0.19 | 0.24 | 0.28 | -0.048 | NA |
| chr15 | 75287694 | 75288699 | SCAMP5       | ENSG00000198794 | 320   | 0.23 | 0.34 | 0.29 | -0.12  | NA |
| chr15 | 90319583 | 90320476 | MESP2        | ENSG00000188095 | 440   | 0.37 | 0.42 | 0.29 | -0.055 | NA |
| chr15 | 52029230 | 52030135 | LYSMD2       | ENSG00000140280 | 652   | 0.21 | 0.16 | 0.3  | 0.052  | NA |
| chr15 | 83419022 | 83419592 | AC105339.1   | ENSG00000250988 | -17   | 0.29 | 0.43 | 0.3  | -0.14  | NA |

|       |           |           |          |                 |       |      |      |      |        |    |
|-------|-----------|-----------|----------|-----------------|-------|------|------|------|--------|----|
| chr15 | 40675019  | 40675628  | C15orf23 | ENSG00000128944 | 401   | 0.25 | 0.2  | 0.31 | 0.051  | NA |
| chr15 | 41624362  | 41625340  | OIP5     | ENSG00000104147 | -32   | 0.23 | 0.16 | 0.31 | 0.075  | NA |
| chr15 | 100346724 | 100347454 | DNM1P46  | ENSG00000182397 | 11    | 0.62 | 0.31 | 0.31 | 0.31   | NA |
| chr15 | 52121816  | 52122452  | TMOD3    | ENSG00000138594 | 289   | 0.23 | 0.2  | 0.32 | 0.036  | NA |
| chr15 | 52970730  | 52971886  | KIAA1370 | ENSG00000047346 | -488  | 0.25 | 0.21 | 0.32 | 0.038  | NA |
| chr15 | 57668337  | 57669028  | CGNL1    | ENSG00000128849 | -21   | 0.27 | 0.31 | 0.32 | -0.047 | NA |
| chr15 | 93198374  | 93199181  | FAM174B  | ENSG00000185442 | 254   | 0.17 | 0.13 | 0.32 | 0.043  | NA |
| chr15 | 41522828  | 41523732  | EXD1     | ENSG00000178997 | -391  | 0.22 | 0.18 | 0.33 | 0.033  | NA |
| chr15 | 51973533  | 51973838  | SCG3     | ENSG00000104112 | 135   | 0.56 | 0.38 | 0.33 | 0.19   | NA |
| chr15 | 40732929  | 40734697  | BAHD1    | ENSG00000140320 | 402   | 0.29 | 0.25 | 0.34 | 0.031  | NA |
| chr15 | 45926877  | 45927758  | SQRDL    | ENSG00000137767 | 316   | 0.23 | 0.27 | 0.34 | -0.044 | NA |
| chr15 | 72766260  | 72767693  | ARIH1    | ENSG00000166233 | 309   | 0.18 | 0.2  | 0.34 | -0.029 | NA |
| chr15 | 91497994  | 91498615  | RCCD1    | ENSG00000166965 | 198   | 0.29 | 0.24 | 0.34 | 0.053  | NA |
| chr15 | 65476794  | 65478055  | CLPX     | ENSG00000166855 | 236   | 0.2  | 0.17 | 0.35 | 0.029  | NA |
| chr15 | 73735322  | 73735609  | C15orf60 | ENSG00000183324 | -34   | 0.93 | 0.98 | 0.35 | -0.045 | NA |
| chr15 | 49103269  | 49103696  | CEP152   | ENSG00000103995 | -212  | 0.22 | 0.4  | 0.36 | -0.18  | NA |
| chr15 | 72409862  | 72411002  | MYO9A    | ENSG00000066933 | -10   | 0.22 | 0.18 | 0.36 | 0.037  | NA |
| chr15 | 27215951  | 27216856  | GABRG3   | ENSG00000182256 | -26   | 0.17 | 0.15 | 0.37 | 0.027  | NA |
| chr15 | 41047210  | 41047687  | FAM82A2  | ENSG00000137824 | -4    | 0.18 | 0.23 | 0.37 | -0.05  | NA |
| chr15 | 56034562  | 56035712  | PRTG     | ENSG00000166450 | 40    | 0.15 | 0.18 | 0.37 | -0.033 | NA |
| chr15 | 83378007  | 83379068  | AP3B2    | ENSG00000103723 | -6    | 0.32 | 0.22 | 0.37 | 0.096  | NA |
| chr15 | 75743081  | 75748449  | SIN3A    | ENSG00000169375 | -1839 | 0.27 | 0.25 | 0.38 | 0.022  | NA |
| chr15 | 89456224  | 89456830  | MFGE8    | ENSG00000140545 | 83    | 0.25 | 0.36 | 0.38 | -0.11  | NA |
| chr15 | 90233530  | 90234083  | PEX11A   | ENSG00000166821 | 207   | 0.27 | 0.2  | 0.38 | 0.066  | NA |
| chr15 | 83680007  | 83680532  | C15orf40 | ENSG00000169609 | 32    | 0.27 | 0.19 | 0.39 | 0.083  | NA |
| chr15 | 86337418  | 86338429  | KLHL25   | ENSG00000183655 | 177   | 0.2  | 0.14 | 0.39 | 0.055  | NA |
| chr15 | 45404769  | 45405482  | DUOXA2   | ENSG00000140274 | -1394 | 0.21 | 0.16 | 0.41 | 0.05   | NA |
| chr15 | 56657477  | 56657883  | TEX9     | ENSG00000151575 | 55    | 0.34 | 0.17 | 0.41 | 0.17   | NA |
| chr15 | 72489478  | 72490119  | GRAMD2   | ENSG00000175318 | 338   | 0.23 | 0.19 | 0.41 | 0.044  | NA |
| chr15 | 78369517  | 78369906  | TBC1D2B  | ENSG00000167202 | -72   | 0.24 | 0.18 | 0.41 | 0.053  | NA |

|       |           |           |               |                 |       |      |      |      |        |    |
|-------|-----------|-----------|---------------|-----------------|-------|------|------|------|--------|----|
| chr15 | 91423329  | 91423583  | FURIN         | ENSG00000140564 | 506   | 0.68 | 0.44 | 0.41 | 0.24   | NA |
| chr15 | 40330991  | 40331563  | SRP14         | ENSG00000140319 | 112   | 0.23 | 0.19 | 0.42 | 0.035  | NA |
| chr15 | 90727879  | 90728570  | SEMA4B        | ENSG00000185033 | 72    | 0.36 | 0.3  | 0.42 | 0.053  | NA |
| chr15 | 34874861  | 34876425  | GOLGA8B       | ENSG00000215252 | -582  | 0.21 | 0.19 | 0.43 | 0.022  | NA |
| chr15 | 40401053  | 40401298  | BMF           | ENSG00000104081 | -100  | 0.26 | 0.4  | 0.43 | -0.14  | NA |
| chr15 | 43028413  | 43029346  | AC090510.1    | ENSG00000246283 | -522  | 0.28 | 0.24 | 0.43 | 0.04   | NA |
| chr15 | 41708907  | 41709951  | RTF1          | ENSG00000137815 | 127   | 0.29 | 0.26 | 0.44 | 0.029  | NA |
| chr15 | 93631428  | 93633173  | RGMA          | ENSG00000182175 | -548  | 0.21 | 0.19 | 0.44 | 0.02   | NA |
| chr15 | 85201196  | 85201684  | NMB           | ENSG00000197696 | 339   | 0.26 | 0.2  | 0.46 | 0.065  | NA |
| chr15 | 64387985  | 64388628  | SNX1          | ENSG0000028528  | 129   | 0.25 | 0.22 | 0.47 | 0.034  | NA |
| chr15 | 68521418  | 68522237  | CLN6          | ENSG00000128973 | 181   | 0.23 | 0.2  | 0.47 | 0.027  | NA |
| chr15 | 72978290  | 72978758  | HIGD2B        | ENSG00000175202 | -34   | 0.51 | 0.41 | 0.47 | 0.1    | NA |
| chr15 | 45694410  | 45695794  | RP11-519G16.1 | ENSG00000230288 | -582  | 0.26 | 0.23 | 0.48 | 0.024  | NA |
| chr15 | 51633724  | 51634318  | GLDN          | ENSG00000186417 | 144   | 0.31 | 0.23 | 0.49 | 0.082  | NA |
| chr15 | 55700140  | 55700806  | DYX1C1        | ENSG00000256061 | -16   | 0.22 | 0.26 | 0.49 | -0.038 | NA |
| chr15 | 40531244  | 40531589  | PAK6          | ENSG00000137843 | 124   | 0.25 | 0.2  | 0.5  | 0.047  | NA |
| chr15 | 45406467  | 45406882  | DUOXA2        | ENSG00000140274 | 155   | 0.28 | 0.17 | 0.5  | 0.1    | NA |
| chr15 | 50646437  | 50647742  | GABPB1        | ENSG00000104064 | 232   | 0.22 | 0.17 | 0.51 | 0.049  | NA |
| chr15 | 75135186  | 75135905  | ULK3          | ENSG00000140474 | 7     | 0.23 | 0.2  | 0.51 | 0.034  | NA |
| chr15 | 91445563  | 91446768  | MAN2A2        | ENSG00000196547 | -1255 | 0.23 | 0.21 | 0.51 | 0.027  | NA |
| chr15 | 42119817  | 42120128  | RP11-23P13.4  | ENSG00000250379 | 81    | 0.29 | 0.11 | 0.52 | 0.17   | NA |
| chr15 | 44092737  | 44093140  | C15orf63      | ENSG00000242028 | 141   | 0.26 | 0.19 | 0.52 | 0.062  | NA |
| chr15 | 71407656  | 71408498  | CT62          | ENSG00000225362 | -238  | 0.25 | 0.21 | 0.52 | 0.036  | NA |
| chr15 | 76351684  | 76352129  | NRG4          | ENSG00000169752 | 163   | 0.14 | 0.24 | 0.53 | -0.099 | NA |
| chr15 | 79574830  | 79575211  | ANKRD34C      | ENSG00000235711 | -126  | 0.19 | 0.24 | 0.53 | -0.043 | NA |
| chr15 | 90118971  | 90119363  | C15orf42      | ENSG00000140534 | 454   | 0.23 | 0.16 | 0.53 | 0.069  | NA |
| chr15 | 89438176  | 89438850  | HAPLN3        | ENSG00000140511 | 344   | 0.31 | 0.28 | 0.54 | 0.034  | NA |
| chr15 | 102264097 | 102264750 | TARSL2        | ENSG00000185418 | 190   | 0.22 | 0.18 | 0.54 | 0.042  | NA |
| chr15 | 65425292  | 65426233  | PDCD7         | ENSG00000090470 | 403   | 0.2  | 0.18 | 0.55 | 0.022  | NA |
| chr15 | 85144078  | 85144611  | ZSCAN2        | ENSG00000176371 | 127   | 0.2  | 0.22 | 0.55 | -0.025 | NA |

|       |           |           |            |                 |       |      |      |      |        |    |
|-------|-----------|-----------|------------|-----------------|-------|------|------|------|--------|----|
| chr15 | 85174489  | 85174787  | SCAND2     | ENSG00000176700 | -44   | 0.2  | 0.33 | 0.55 | -0.13  | NA |
| chr15 | 101817246 | 101817915 | AC023024.1 | ENSG00000131871 | -91   | 0.25 | 0.22 | 0.55 | 0.037  | NA |
| chr15 | 52263568  | 52264225  | LEO1       | ENSG00000166477 | 83    | 0.29 | 0.33 | 0.56 | -0.047 | NA |
| chr15 | 65688039  | 65688539  | IGDCC4     | ENSG00000103742 | 398   | 0.73 | 1    | 0.56 | -0.27  | NA |
| chr15 | 74988166  | 74988669  | EDC3       | ENSG00000179151 | -33   | 0.18 | 0.24 | 0.56 | -0.057 | NA |
| chr15 | 56285260  | 56286295  | NEDD4      | ENSG00000069869 | -31   | 0.35 | 0.29 | 0.57 | 0.06   | NA |
| chr15 | 85923604  | 85924680  | AKAP13     | ENSG00000170776 | 271   | 0.18 | 0.21 | 0.58 | -0.029 | NA |
| chr15 | 37392601  | 37392829  | MEIS2      | ENSG00000134138 | -11   | 0.43 | 0.37 | 0.59 | 0.055  | NA |
| chr15 | 23085441  | 23086898  | NIPA1      | ENSG00000170113 | 132   | 0.24 | 0.22 | 0.6  | 0.02   | NA |
| chr15 | 35261686  | 35262124  | AQR        | ENSG00000021776 | 51    | 0.27 | 0.16 | 0.6  | 0.11   | NA |
| chr15 | 64385875  | 64386322  | FAM96A     | ENSG00000166797 | 109   | 0.23 | 0.18 | 0.6  | 0.056  | NA |
| chr15 | 89876390  | 89876956  | POLG       | ENSG00000140521 | -198  | 0.91 | 0.93 | 0.6  | -0.019 | NA |
| chr15 | 74044561  | 74045885  | C15orf59   | ENSG00000205363 | -1407 | 0.21 | 0.22 | 0.61 | -0.017 | NA |
| chr15 | 90198100  | 90198833  | KIF7       | ENSG00000166813 | 216   | 0.28 | 0.25 | 0.61 | 0.026  | NA |
| chr15 | 78236688  | 78237084  | AC104758.1 | ENSG00000214646 | -1795 | 0.19 | 0.23 | 0.62 | -0.039 | NA |
| chr15 | 24920613  | 24921252  | C15orf2    | ENSG00000185823 | 391   | 0.93 | 0.91 | 0.63 | 0.017  | NA |
| chr15 | 60690708  | 60690930  | ANXA2      | ENSG00000182718 | -634  | 0.23 | 0.16 | 0.63 | 0.076  | NA |
| chr15 | 89346043  | 89347203  | ACAN       | ENSG00000157766 | -51   | 0.23 | 0.19 | 0.63 | 0.032  | NA |
| chr15 | 91072689  | 91073976  | CRTC3      | ENSG00000140577 | 175   | 0.24 | 0.22 | 0.63 | 0.018  | NA |
| chr15 | 85258839  | 85259825  | SEC11A     | ENSG00000140612 | 10    | 0.25 | 0.21 | 0.64 | 0.036  | NA |
| chr15 | 89147660  | 89149198  | AC013489.2 | ENSG00000249487 | -595  | 0.21 | 0.19 | 0.64 | 0.023  | NA |
| chr15 | 48623185  | 48624651  | DUT        | ENSG00000128951 | 297   | 0.18 | 0.19 | 0.65 | -0.015 | NA |
| chr15 | 79603220  | 79604093  | TMED3      | ENSG00000166557 | 252   | 0.23 | 0.21 | 0.65 | 0.02   | NA |
| chr15 | 100890242 | 100890494 | AC015723.1 | ENSG00000189419 | 70    | 0.25 | 0.22 | 0.65 | 0.03   | NA |
| chr15 | 41217789  | 41223180  | DLL4       | ENSG00000128917 | -1063 | 0.33 | 0.31 | 0.66 | 0.012  | NA |
| chr15 | 73075586  | 73076663  | ADPGK      | ENSG00000159322 | -63   | 0.25 | 0.27 | 0.66 | -0.02  | NA |
| chr15 | 75198639  | 75199494  | C15orf17   | ENSG00000178761 | 112   | 0.23 | 0.21 | 0.66 | 0.019  | NA |
| chr15 | 30918312  | 30918565  | ARHGAP11B  | ENSG00000187951 | -441  | 0.21 | 0.15 | 0.67 | 0.062  | NA |
| chr15 | 40226210  | 40226631  | EIF2AK4    | ENSG00000128829 | 73    | 0.33 | 0.29 | 0.67 | 0.039  | NA |
| chr15 | 33486847  | 33487290  | AC090098.1 | ENSG00000186031 | -171  | 0.31 | 0.24 | 0.68 | 0.068  | NA |

|       |           |           |               |                 |      |      |      |      |        |    |
|-------|-----------|-----------|---------------|-----------------|------|------|------|------|--------|----|
| chr15 | 41694493  | 41694756  | NDUFAF1       | ENSG00000137806 | 34   | 0.16 | 0.13 | 0.68 | 0.027  | NA |
| chr15 | 65903211  | 65903670  | C15orf44      | ENSG00000138614 | 29   | 0.19 | 0.23 | 0.68 | -0.037 | NA |
| chr15 | 83951980  | 83953930  | BNC1          | ENSG00000169594 | -746 | 0.24 | 0.25 | 0.68 | -0.014 | NA |
| chr15 | 65281928  | 65282375  | SPG21         | ENSG00000090487 | 100  | 0.21 | 0.19 | 0.69 | 0.023  | NA |
| chr15 | 42500160  | 42500561  | VPS39         | ENSG00000166887 | -9   | 0.24 | 0.22 | 0.71 | 0.023  | NA |
| chr15 | 59063287  | 59064086  | FAM63B        | ENSG00000128923 | 293  | 0.24 | 0.26 | 0.71 | -0.014 | NA |
| chr15 | 74467613  | 74467892  | ISLR          | ENSG00000129009 | 910  | 0.98 | 1    | 0.71 | -0.022 | NA |
| chr15 | 77711625  | 77712910  | HMG20A        | ENSG00000140382 | -726 | 0.19 | 0.18 | 0.71 | 0.014  | NA |
| chr15 | 64647914  | 64648523  | CSNK1G1       | ENSG00000169118 | 168  | 0.27 | 0.36 | 0.72 | -0.093 | NA |
| chr15 | 37110361  | 37110778  | AC019016.1    | ENSG00000223518 | 138  | 0.99 | 0.98 | 0.73 | 0.012  | NA |
| chr15 | 85176628  | 85177414  | RP11-245C17.1 | ENSG00000254779 | -84  | 0.16 | 0.17 | 0.73 | -0.012 | NA |
| chr15 | 41099243  | 41099878  | ZFYVE19       | ENSG00000166140 | 286  | 0.19 | 0.23 | 0.74 | -0.047 | NA |
| chr15 | 90455562  | 90456263  | C15orf38      | ENSG00000242498 | 7    | 0.19 | 0.17 | 0.74 | 0.015  | NA |
| chr15 | 90808574  | 90809251  | NGRN          | ENSG00000182768 | 21   | 0.3  | 0.27 | 0.74 | 0.032  | NA |
| chr15 | 75182262  | 75182622  | MPI           | ENSG00000178802 | 79   | 0.28 | 0.25 | 0.75 | 0.027  | NA |
| chr15 | 90437025  | 90437602  | AP3S2         | ENSG00000157823 | -104 | 0.23 | 0.25 | 0.75 | -0.017 | NA |
| chr15 | 90895472  | 90895990  | ZNF774        | ENSG00000196391 | 254  | 0.19 | 0.23 | 0.75 | -0.039 | NA |
| chr15 | 61520423  | 61521716  | RORA          | ENSG00000069667 | 263  | 0.27 | 0.25 | 0.76 | 0.021  | NA |
| chr15 | 67546789  | 67547410  | AAGAB         | ENSG00000103591 | -25  | 0.19 | 0.23 | 0.76 | -0.034 | NA |
| chr15 | 74753413  | 74753979  | UBL7          | ENSG00000138629 | -177 | 0.28 | 0.32 | 0.77 | -0.037 | NA |
| chr15 | 71145995  | 71146820  | LARP6         | ENSG00000166173 | 59   | 0.25 | 0.23 | 0.78 | 0.02   | NA |
| chr15 | 91473314  | 91473592  | UNC45A        | ENSG00000140553 | 43   | 0.3  | 0.27 | 0.78 | 0.028  | NA |
| chr15 | 32322164  | 32323060  | CHRNA7        | ENSG00000175344 | -79  | 0.25 | 0.26 | 0.79 | -0.014 | NA |
| chr15 | 60689749  | 60690430  | ANXA2         | ENSG00000182718 | 96   | 0.19 | 0.21 | 0.79 | -0.02  | NA |
| chr15 | 41952535  | 41953222  | MGA           | ENSG00000174197 | 268  | 0.23 | 0.24 | 0.8  | -0.014 | NA |
| chr15 | 45003460  | 45004345  | B2M           | ENSG00000166710 | 227  | 0.23 | 0.26 | 0.81 | -0.032 | NA |
| chr15 | 83875648  | 83877079  | AC024270.1    | ENSG00000166503 | -42  | 0.22 | 0.21 | 0.81 | 0.0099 | NA |
| chr15 | 85777124  | 85778138  | AKAP13        | ENSG00000170776 | -186 | 0.24 | 0.2  | 0.82 | 0.034  | NA |
| chr15 | 100272901 | 100273891 | LYSMD4        | ENSG00000183060 | 148  | 0.2  | 0.22 | 0.82 | -0.02  | NA |
| chr15 | 81426499  | 81426702  | C15orf26      | ENSG00000156206 | -44  | 0.18 | 0.23 | 0.83 | -0.057 | NA |

|       |           |           |            |                 |      |      |      |      |         |    |
|-------|-----------|-----------|------------|-----------------|------|------|------|------|---------|----|
| chr15 | 91414311  | 91415427  | AC068831.1 | ENSG00000214432 | 1721 | 0.19 | 0.18 | 0.83 | 0.009   | NA |
| chr15 | 26107503  | 26108818  | ATP10A     | ENSG00000206190 | 195  | 0.21 | 0.21 | 0.84 | -0.008  | NA |
| chr15 | 44580804  | 44581543  | CASC4      | ENSG00000166734 | 244  | 0.22 | 0.23 | 0.84 | -0.016  | NA |
| chr15 | 37390175  | 37390380  | MEIS2      | ENSG00000134138 | 226  | 0.18 | 0.17 | 0.85 | 0.011   | NA |
| chr15 | 42782959  | 42783377  | ZFP106     | ENSG00000103994 | 168  | 0.36 | 0.33 | 0.85 | 0.033   | NA |
| chr15 | 68113241  | 68113520  | SKOR1      | ENSG00000188779 | 1338 | 0.29 | 0.33 | 0.85 | -0.04   | NA |
| chr15 | 51057603  | 51058123  | AC012100.1 | ENSG00000138600 | 47   | 0.18 | 0.17 | 0.86 | 0.013   | NA |
| chr15 | 63449418  | 63449874  | RPS27L     | ENSG00000185088 | -166 | 0.27 | 0.25 | 0.86 | 0.016   | NA |
| chr15 | 78441495  | 78442261  | IDH3A      | ENSG00000166411 | 215  | 0.24 | 0.22 | 0.86 | 0.015   | NA |
| chr15 | 37393666  | 37394248  | MEIS2      | ENSG00000134138 | -453 | 0.22 | 0.19 | 0.88 | 0.035   | NA |
| chr15 | 65133371  | 65134329  | AC069368.3 | ENSG00000249240 | -232 | 0.25 | 0.27 | 0.88 | -0.02   | NA |
| chr15 | 45669970  | 45671029  | GATM       | ENSG00000171766 | 480  | 0.22 | 0.21 | 0.9  | 0.0063  | NA |
| chr15 | 66585767  | 66586494  | DIS3L      | ENSG00000166938 | 219  | 0.3  | 0.32 | 0.9  | -0.017  | NA |
| chr15 | 67834786  | 67835510  | MAP2K5     | ENSG00000137764 | 127  | 0.2  | 0.21 | 0.9  | -0.012  | NA |
| chr15 | 91565454  | 91565920  | VPS33B     | ENSG00000184056 | 56   | 0.23 | 0.24 | 0.9  | -0.017  | NA |
| chr15 | 75628250  | 75628677  | COMMD4     | ENSG00000140365 | 48   | 0.34 | 0.36 | 0.91 | -0.025  | NA |
| chr15 | 33602816  | 33604003  | RYR3       | ENSG00000198838 | 232  | 0.19 | 0.2  | 0.92 | -0.0069 | NA |
| chr15 | 78894267  | 78894501  | CHRNA3     | ENSG00000080644 | 191  | 1    | 0.98 | 0.93 | 0.017   | NA |
| chr15 | 75639595  | 75640743  | NEIL1      | ENSG00000140398 | 838  | 0.2  | 0.19 | 0.94 | 0.0078  | NA |
| chr15 | 76352316  | 76352533  | C15orf27   | ENSG00000169758 | 125  | 0.28 | 0.32 | 0.94 | -0.044  | NA |
| chr15 | 101593447 | 101593882 | LRRK1      | ENSG00000154237 | 122  | 0.94 | 0.93 | 0.94 | 0.016   | NA |
| chr15 | 29862035  | 29863649  | FAM189A1   | ENSG00000104059 | 85   | 0.26 | 0.26 | 0.95 | -0.0051 | NA |
| chr15 | 31283404  | 31284414  | MTMR10     | ENSG00000166912 | -102 | 0.22 | 0.22 | 0.95 | 0.0052  | NA |
| chr15 | 61519621  | 61520031  | RORA       | ENSG00000069667 | 1506 | 0.26 | 0.27 | 0.95 | -0.013  | NA |
| chr15 | 40453005  | 40453685  | BUB1B      | ENSG00000156970 | 118  | 0.28 | 0.25 | 0.96 | 0.027   | NA |
| chr15 | 76603563  | 76604026  | ETFA       | ENSG00000140374 | -49  | 0.22 | 0.23 | 0.96 | -0.0096 | NA |
| chr15 | 76628998  | 76629207  | ISL2       | ENSG00000159556 | 37   | 0.19 | 0.18 | 0.96 | 0.017   | NA |
| chr15 | 93615622  | 93617185  | RGMA       | ENSG00000182175 | 506  | 0.3  | 0.3  | 0.97 | -0.0048 | NA |
| chr15 | 44828637  | 44829949  | AC009996.1 | ENSG00000179523 | -172 | 0.24 | 0.24 | 0.98 | 0.0057  | NA |
| chr15 | 41244885  | 41246004  | CHAC1      | ENSG00000128965 | 97   | 0.28 | 0.28 | 0.99 | 0.005   | NA |



|       |           |           |            |                 |       |      |      |      |          |    |
|-------|-----------|-----------|------------|-----------------|-------|------|------|------|----------|----|
| chr15 | 75251467  | 75251773  | RPP25      | ENSG00000178718 | -1815 | 0.33 | 0.3  | 0.99 | 0.034    | NA |
| chr15 | 36871459  | 36871897  | C15orf41   | ENSG00000186073 | -134  | 0.33 | 0.17 | 1    | 0.17     | NA |
| chr15 | 40074645  | 40075188  | FSIP1      | ENSG00000150667 | 123   | 0.2  | 0.2  | 1    | 0.0016   | NA |
| chr15 | 40697781  | 40698368  | IVD        | ENSG00000128928 | 78    | 0.22 | 0.2  | 1    | 0.022    | NA |
| chr15 | 41186255  | 41187169  | VPS18      | ENSG00000104142 | 85    | 0.21 | 0.21 | 1    | -0.0018  | NA |
| chr15 | 43785243  | 43785490  | TP53BP1    | ENSG00000067369 | -82   | 0.23 | 0.24 | 1    | -0.016   | NA |
| chr15 | 45490945  | 45491252  | SHF        | ENSG00000138606 | 1971  | 0.23 | 0.21 | 1    | 0.018    | NA |
| chr15 | 52860752  | 52861410  | ARPP19     | ENSG00000128989 | 132   | 0.23 | 0.24 | 1    | -0.0076  | NA |
| chr15 | 56535651  | 56536129  | RFX7       | ENSG00000181827 | -407  | 0.19 | 0.19 | 1    | 0.0045   | NA |
| chr15 | 60883298  | 60885350  | RORA       | ENSG00000069667 | 383   | 0.25 | 0.24 | 1    | 0.0016   | NA |
| chr15 | 66789933  | 66790248  | SNAPC5     | ENSG00000174446 | 12    | 0.23 | 0.22 | 1    | 0.01     | NA |
| chr15 | 69706516  | 69707352  | KIF23      | ENSG00000137807 | 246   | 0.3  | 0.3  | 1    | #####    | NA |
| chr15 | 73659860  | 73662015  | HCN4       | ENSG00000138622 | 668   | 0.24 | 0.24 | 1    | 2.30E-05 | NA |
| chr15 | 74392341  | 74392803  | AC010931.1 | ENSG00000214702 | -1814 | 0.2  | 0.28 | 1    | -0.082   | NA |
| chr15 | 78633322  | 78634089  | CRABP1     | ENSG00000166426 | 887   | 0.58 | 0.59 | 1    | -0.01    | NA |
| chr15 | 83654590  | 83655245  | AC022558.1 | ENSG00000245763 | -297  | 0.33 | 0.31 | 1    | 0.019    | NA |
| chr15 | 85523512  | 85525865  | PDE8A      | ENSG00000073417 | 1017  | 0.23 | 0.23 | 1    | 0.0015   | NA |
| chr15 | 86312153  | 86313047  | MIR1276    | ENSG00000221634 | 1209  | 0.99 | 0.99 | 1    | 0.0044   | NA |
| chr15 | 89631546  | 89632209  | ABHD2      | ENSG00000140526 | 472   | 0.22 | 0.22 | 1    | -0.0025  | NA |
| chr15 | 90931162  | 90932019  | IQGAP1     | ENSG00000140575 | 140   | 0.22 | 0.23 | 1    | -0.0022  | NA |
| chr15 | 91475626  | 91475926  | HDDC3      | ENSG00000184508 | 0     | 0.2  | 0.2  | 1    | 0.0016   | NA |
| chr15 | 93447556  | 93447823  | CHD2       | ENSG00000173575 | -14   | 0.27 | 0.33 | 1    | -0.064   | NA |
| chr15 | 99791328  | 99792042  | TTC23      | ENSG00000103852 | -263  | 0.18 | 0.18 | 1    | -0.0011  | NA |
| chr15 | 101458286 | 101460223 | LRRK1      | ENSG00000154237 | -166  | 0.25 | 0.24 | 1    | 0.0063   | NA |
| chr15 | 28834219  | 28834690  | HERC2P9    | ENSG00000206149 | -184  | 1    | NA   | NA   | NA       | NA |
| chr15 | 30762927  | 30763795  | AC019322.2 | ENSG00000215302 | -96   | 0.13 | NA   | NA   | NA       | NA |
| chr15 | 41836145  | 41836612  | RPAP1      | ENSG00000103932 | 86    | 0.5  | NA   | NA   | NA       | NA |
| chr15 | 42066488  | 42067230  | MAPKBP1    | ENSG00000137802 | 227   | 1    | NA   | NA   | NA       | NA |
| chr15 | 42566198  | 42566404  | GANC       | ENSG00000214013 | -139  | 0.5  | NA   | NA   | NA       | NA |
| chr15 | 55790301  | 55790754  | DYX1C1     | ENSG00000256061 | 12    | 0.22 | NA   | NA   | NA       | NA |

|       |          |          |               |                 |       |      |      |          |       |    |
|-------|----------|----------|---------------|-----------------|-------|------|------|----------|-------|----|
| chr15 | 56757179 | 56757383 | MNS1          | ENSG00000138587 | 54    | 0.13 | NA   | NA       | NA    | NA |
| chr15 | 68132640 | 68133071 | RNU6-1        | ENSG00000206625 | -472  | 1    | NA   | NA       | NA    | NA |
| chr15 | 95869955 | 95870322 | AC104260.1    | ENSG00000248441 | 191   | NA   | 1    | NA       | NA    | NA |
| chr16 | 31053479 | 31053800 | AC135050.2    | ENSG00000249093 | 1265  | 0.78 | 0.31 | 1.50E-09 | 0.47  | NA |
| chr16 | 86588435 | 86589513 | MTHFSD        | ENSG00000103248 | -133  | 0.45 | 0.2  | 3.20E-09 | 0.25  | NA |
| chr16 | 423871   | 424423   | TMEM8A        | ENSG00000129925 | 704   | 0.93 | 0.62 | 3.60E-09 | 0.31  | NA |
| chr16 | 57126044 | 57127110 | CPNE2         | ENSG00000140848 | 71    | 0.92 | 0.32 | 7.90E-09 | 0.6   | NA |
| chr16 | 2284626  | 2285598  | DNASE1L2      | ENSG00000167968 | -705  | 0.84 | 0.6  | 1.40E-08 | 0.24  | NA |
| chr16 | 3550108  | 3550346  | CLUAP1        | ENSG00000103351 | -736  | 0.95 | 0.42 | 2.40E-08 | 0.53  | NA |
| chr16 | 32857241 | 32858277 | IGHV2OR16-5   | ENSG00000214618 | -1199 | 0.81 | 0.63 | 3.10E-08 | 0.18  | NA |
| chr16 | 837376   | 839341   | CHTF18        | ENSG00000127586 | 312   | 0.34 | 0.21 | 6.20E-08 | 0.13  | NA |
| chr16 | 4321639  | 4324073  | TFAP4         | ENSG00000090447 | 145   | 0.29 | 0.16 | 9.00E-08 | 0.13  | NA |
| chr16 | 88869780 | 88870592 | CDT1          | ENSG00000167513 | 0     | 0.37 | 0.15 | 9.20E-08 | 0.22  | NA |
| chr16 | 19125136 | 19126607 | ITPRIPL2      | ENSG00000205730 | 617   | 0.39 | 0.23 | 1.10E-07 | 0.16  | NA |
| chr16 | 75033041 | 75034207 | ZNRF1         | ENSG00000186187 | 374   | 0.35 | 0.15 | 1.20E-07 | 0.21  | NA |
| chr16 | 318617   | 318901   | ARHGDIG       | ENSG00000242173 | 33    | 0.61 | 0.26 | 1.60E-07 | 0.34  | NA |
| chr16 | 1128223  | 1130394  | SSTR5         | ENSG00000162009 | 527   | 0.38 | 0.56 | 2.00E-07 | -0.18 | NA |
| chr16 | 89160018 | 89160706 | ACSF3         | ENSG00000176715 | 145   | 0.54 | 0.18 | 2.30E-07 | 0.35  | NA |
| chr16 | 29086220 | 29086434 | AC009093.1    | ENSG00000103472 | -13   | 0.75 | 0.34 | 3.20E-07 | 0.42  | NA |
| chr16 | 57317967 | 57318964 | PLLP          | ENSG00000102934 | 134   | 0.3  | 0.15 | 4.90E-07 | 0.15  | NA |
| chr16 | 67427284 | 67428950 | TPPP3         | ENSG00000159713 | -723  | 0.92 | 0.75 | 5.10E-07 | 0.17  | NA |
| chr16 | 431189   | 432810   | TMEM8A        | ENSG00000129925 | -21   | 0.39 | 0.2  | 5.40E-07 | 0.19  | NA |
| chr16 | 70472588 | 70473649 | ST3GAL2       | ENSG00000157350 | -127  | 0.33 | 0.14 | 6.20E-07 | 0.19  | NA |
| chr16 | 67195600 | 67195827 | FBXL8         | ENSG00000135722 | 121   | 0.93 | 0.3  | 7.60E-07 | 0.62  | NA |
| chr16 | 21531112 | 21532123 | CTD-2547E10.2 | ENSG00000180747 | -286  | 0.22 | 0.11 | 8.00E-07 | 0.11  | NA |
| chr16 | 2801913  | 2803409  | SRRM2         | ENSG00000167978 | 331   | 0.36 | 0.2  | 1.10E-06 | 0.17  | NA |
| chr16 | 22018987 | 22020057 | C16orf52      | ENSG00000185716 | 66    | 0.42 | 0.25 | 1.10E-06 | 0.17  | NA |
| chr16 | 66461071 | 66462213 | BEAN1         | ENSG00000166546 | 826   | 0.47 | 0.19 | 1.10E-06 | 0.27  | NA |
| chr16 | 2389706  | 2392164  | ABCA3         | ENSG00000167972 | -341  | 0.36 | 0.26 | 1.20E-06 | 0.1   | NA |
| chr16 | 15068516 | 15069461 | PDXDC1        | ENSG00000179889 | 389   | 0.42 | 0.17 | 1.20E-06 | 0.25  | NA |

|       |          |          |               |                 |       |      |      |          |       |    |
|-------|----------|----------|---------------|-----------------|-------|------|------|----------|-------|----|
| chr16 | 22448200 | 22449028 | RP11-368J21.1 | ENSG00000237296 | 285   | 0.4  | 0.16 | 1.20E-06 | 0.23  | NA |
| chr16 | 2149842  | 2150523  | PKD1          | ENSG00000008710 | 505   | 0.94 | 0.37 | 1.30E-06 | 0.56  | NA |
| chr16 | 30022651 | 30023007 | DOC2A         | ENSG00000149927 | -428  | 0.5  | 0.18 | 1.30E-06 | 0.32  | NA |
| chr16 | 29984664 | 29985459 | TAOK2         | ENSG00000149930 | -161  | 0.38 | 0.14 | 1.50E-06 | 0.24  | NA |
| chr16 | 576725   | 577927   | SOLH          | ENSG00000103326 | -530  | 0.29 | 0.15 | 1.80E-06 | 0.14  | NA |
| chr16 | 23846941 | 23848102 | PRKCB         | ENSG00000166501 | 199   | 0.34 | 0.19 | 2.20E-06 | 0.15  | NA |
| chr16 | 68480864 | 68482822 | SMPD3         | ENSG00000103056 | 748   | 0.46 | 0.21 | 3.40E-06 | 0.26  | NA |
| chr16 | 23193716 | 23194773 | SCNN1G        | ENSG00000166828 | 208   | 0.29 | 0.15 | 3.70E-06 | 0.14  | NA |
| chr16 | 68269010 | 68272143 | ESRP2         | ENSG00000103067 | -603  | 0.51 | 0.36 | 3.80E-06 | 0.15  | NA |
| chr16 | 82044886 | 82045306 | SDR42E1       | ENSG00000184860 | -26   | 0.75 | 0.35 | 3.80E-06 | 0.4   | NA |
| chr16 | 84220196 | 84220779 | TAF1C         | ENSG00000103168 | 108   | 0.3  | 0.12 | 5.60E-06 | 0.18  | NA |
| chr16 | 1979595  | 1980292  | AL031723.2    | ENSG00000220489 | -1135 | 0.32 | 0.15 | 6.80E-06 | 0.17  | NA |
| chr16 | 1478221  | 1478812  | C16orf91      | ENSG00000174109 | 829   | 0.89 | 0.59 | 7.40E-06 | 0.3   | NA |
| chr16 | 30006578 | 30007874 | INO80E        | ENSG00000169592 | 195   | 0.37 | 0.15 | 1.10E-05 | 0.22  | NA |
| chr16 | 56642129 | 56642595 | MT2A          | ENSG00000125148 | 251   | 0.52 | 0.28 | 1.20E-05 | 0.24  | NA |
| chr16 | 86599355 | 86602649 | MTHFSD        | ENSG00000103248 | -994  | 0.32 | 0.22 | 1.40E-05 | 0.1   | NA |
| chr16 | 638545   | 640705   | RAB40C        | ENSG00000197562 | 268   | 0.24 | 0.16 | 1.50E-05 | 0.088 | NA |
| chr16 | 56701863 | 56702208 | MT1G          | ENSG00000125144 | -58   | 0.39 | 0.18 | 1.50E-05 | 0.22  | NA |
| chr16 | 2835063  | 2835958  | PRSS33        | ENSG00000103355 | 1198  | 0.31 | 0.13 | 1.70E-05 | 0.17  | NA |
| chr16 | 790626   | 791332   | NARFL         | ENSG00000103245 | -45   | 0.4  | 0.15 | 1.80E-05 | 0.25  | NA |
| chr16 | 85644947 | 85649027 | KIAA0182      | ENSG00000131149 | 1964  | 0.31 | 0.21 | 1.80E-05 | 0.1   | NA |
| chr16 | 85171019 | 85171323 | AC026469.1    | ENSG00000248782 | 415   | 0.72 | 0.26 | 2.00E-05 | 0.47  | NA |
| chr16 | 698826   | 700244   | AL022341.3    | ENSG00000228201 | -335  | 0.33 | 0.22 | 2.10E-05 | 0.11  | NA |
| chr16 | 73081590 | 73082565 | ZFH3          | ENSG00000140836 | 197   | 0.35 | 0.18 | 2.60E-05 | 0.16  | NA |
| chr16 | 29911347 | 29912042 | ASPHD1        | ENSG00000174939 | -6    | 0.36 | 0.14 | 3.10E-05 | 0.22  | NA |
| chr16 | 28833904 | 28835873 | ATXN2L        | ENSG00000168488 | 568   | 0.29 | 0.19 | 3.50E-05 | 0.099 | NA |
| chr16 | 29675845 | 29676120 | QPRT          | ENSG00000103485 | 1382  | 0.74 | 0.32 | 3.50E-05 | 0.41  | NA |
| chr16 | 56623068 | 56623914 | MT3           | ENSG00000087250 | 307   | 0.38 | 0.13 | 4.70E-05 | 0.25  | NA |
| chr16 | 68118564 | 68119986 | NFATC3        | ENSG00000072736 | 621   | 0.29 | 0.15 | 4.70E-05 | 0.15  | NA |
| chr16 | 15149204 | 15150107 | NTAN1         | ENSG00000157045 | 266   | 0.3  | 0.15 | 4.90E-05 | 0.15  | NA |

|       |          |          |          |                 |       |      |      |          |       |    |
|-------|----------|----------|----------|-----------------|-------|------|------|----------|-------|----|
| chr16 | 28985881 | 28986661 | SPNS1    | ENSG00000169682 | 175   | 0.36 | 0.19 | 4.90E-05 | 0.17  | NA |
| chr16 | 67595868 | 67597554 | CTCF     | ENSG00000102974 | 401   | 0.27 | 0.15 | 5.80E-05 | 0.12  | NA |
| chr16 | 27560979 | 27561560 | GTF3C1   | ENSG00000077235 | -18   | 0.31 | 0.14 | 6.10E-05 | 0.17  | NA |
| chr16 | 58535040 | 58535596 | NDRG4    | ENSG00000103034 | 1271  | 0.52 | 0.19 | 6.80E-05 | 0.33  | NA |
| chr16 | 88518729 | 88522514 | ZFPM1    | ENSG00000179588 | 896   | 0.33 | 0.21 | 7.20E-05 | 0.12  | NA |
| chr16 | 3063679  | 3063981  | CLDN9    | ENSG00000213937 | 1373  | 0.35 | 0.94 | 7.30E-05 | -0.6  | NA |
| chr16 | 18937030 | 18938126 | SMG1     | ENSG00000157106 | 148   | 0.3  | 0.15 | 7.60E-05 | 0.14  | NA |
| chr16 | 67280023 | 67283152 | FHOD1    | ENSG00000135723 | -26   | 0.27 | 0.17 | 8.50E-05 | 0.1   | NA |
| chr16 | 2153239  | 2153872  | PKD1     | ENSG00000008710 | -23   | 1    | 0.6  | 8.80E-05 | 0.4   | NA |
| chr16 | 87902454 | 87903460 | SLC7A5   | ENSG00000103257 | 168   | 0.48 | 0.28 | 9.60E-05 | 0.2   | NA |
| chr16 | 68678686 | 68680149 | CDH3     | ENSG00000062038 | 678   | 0.3  | 0.17 | 0.00011  | 0.14  | NA |
| chr16 | 52579636 | 52580845 | TOX3     | ENSG00000103460 | 566   | 0.34 | 0.2  | 0.00012  | 0.14  | NA |
| chr16 | 14013751 | 14014295 | ERCC4    | ENSG00000175595 | 9     | 0.37 | 0.12 | 0.00013  | 0.25  | NA |
| chr16 | 30933637 | 30935774 | FBXL19   | ENSG00000099364 | 313   | 0.32 | 0.19 | 0.00013  | 0.13  | NA |
| chr16 | 31213566 | 31214287 | PYCARD   | ENSG00000103490 | 85    | 0.33 | 0.17 | 0.00013  | 0.16  | NA |
| chr16 | 66583236 | 66584135 | TK2      | ENSG00000166548 | 16    | 0.4  | 0.23 | 0.00013  | 0.16  | NA |
| chr16 | 15743759 | 15744423 | NDE1     | ENSG00000072864 | 7     | 0.31 | 0.16 | 0.00014  | 0.14  | NA |
| chr16 | 284478   | 285395   | ITFG3    | ENSG00000167930 | 391   | 0.32 | 0.16 | 0.00018  | 0.17  | NA |
| chr16 | 1411892  | 1412368  | GNPTG    | ENSG00000090581 | 1506  | 0.74 | 0.92 | 0.00018  | -0.18 | NA |
| chr16 | 4818667  | 4819033  | ZNF500   | ENSG00000103199 | -1633 | 0.59 | 0.31 | 0.00018  | 0.28  | NA |
| chr16 | 68771034 | 68772344 | CDH1     | ENSG00000039068 | 561   | 0.33 | 0.22 | 2.00E-04 | 0.11  | NA |
| chr16 | 50099720 | 50100534 | HEATR3   | ENSG00000155393 | 230   | 0.24 | 0.13 | 0.00022  | 0.11  | NA |
| chr16 | 53737617 | 53738235 | RPGRIP1L | ENSG00000103494 | -155  | 0.52 | 0.2  | 0.00022  | 0.33  | NA |
| chr16 | 56665945 | 56666641 | MT1M     | ENSG00000205364 | -241  | 0.36 | 0.19 | 0.00023  | 0.17  | NA |
| chr16 | 84178000 | 84179223 | HSDL1    | ENSG00000103160 | 184   | 0.3  | 0.15 | 0.00023  | 0.15  | NA |
| chr16 | 89626644 | 89627869 | RPL13    | ENSG00000167526 | 200   | 0.27 | 0.17 | 0.00023  | 0.1   | NA |
| chr16 | 89767253 | 89768882 | SPATA2L  | ENSG00000158792 | 36    | 0.25 | 0.14 | 0.00023  | 0.11  | NA |
| chr16 | 70284892 | 70285956 | EXOSC6   | ENSG00000223496 | 409   | 0.28 | 0.15 | 0.00026  | 0.13  | NA |
| chr16 | 11348541 | 11350803 | SOCS1    | ENSG00000185338 | 364   | 0.28 | 0.19 | 0.00035  | 0.092 | NA |
| chr16 | 50581475 | 50582735 | NKD1     | ENSG00000140807 | -136  | 0.31 | 0.15 | 0.00036  | 0.15  | NA |

|       |          |          |          |                 |       |      |      |          |       |    |
|-------|----------|----------|----------|-----------------|-------|------|------|----------|-------|----|
| chr16 | 30537528 | 30538893 | ZNF768   | ENSG00000169957 | -293  | 0.3  | 0.18 | 4.00E-04 | 0.12  | NA |
| chr16 | 2848426  | 2849145  | PRSS41   | ENSG00000215148 | 299   | 0.85 | 0.72 | 0.00041  | 0.13  | NA |
| chr16 | 81812710 | 81813707 | PLCG2    | ENSG00000197943 | 301   | 0.27 | 0.13 | 0.00041  | 0.14  | NA |
| chr16 | 75298976 | 75300186 | BCAR1    | ENSG00000050820 | -468  | 0.28 | 0.17 | 0.00042  | 0.12  | NA |
| chr16 | 4524138  | 4524712  | NMRAL1   | ENSG00000153406 | 107   | 0.29 | 0.16 | 0.00043  | 0.12  | NA |
| chr16 | 3450716  | 3451667  | ZNF434   | ENSG00000140987 | -227  | 0.3  | 0.16 | 0.00048  | 0.14  | NA |
| chr16 | 67514398 | 67515345 | ATP6V0D1 | ENSG00000159720 | 149   | 0.34 | 0.19 | 0.00048  | 0.15  | NA |
| chr16 | 67678592 | 67679196 | RLTPR    | ENSG00000159753 | -136  | 0.22 | 0.4  | 0.00055  | -0.18 | NA |
| chr16 | 2892579  | 2892810  | PRSS30P  | ENSG00000172460 | -55   | 0.31 | 0.52 | 0.00063  | -0.21 | NA |
| chr16 | 1524520  | 1525534  | CLCN7    | ENSG00000103249 | 51    | 0.25 | 0.15 | 0.00064  | 0.098 | NA |
| chr16 | 65154656 | 65157664 | CDH11    | ENSG00000140937 | -233  | 0.33 | 0.23 | 0.00064  | 0.11  | NA |
| chr16 | 67562575 | 67563390 | FAM65A   | ENSG00000039523 | 262   | 0.32 | 0.17 | 0.00064  | 0.15  | NA |
| chr16 | 2129159  | 2129669  | TSC2     | ENSG00000103197 | 1174  | 0.79 | 0.93 | 0.00068  | -0.14 | NA |
| chr16 | 70507026 | 70507246 | FUK      | ENSG00000157353 | -1392 | 0.41 | 0.14 | 0.00069  | 0.27  | NA |
| chr16 | 1202414  | 1204624  | CACNA1H  | ENSG00000196557 | 278   | 0.26 | 0.36 | 0.00071  | -0.1  | NA |
| chr16 | 1831721  | 1833568  | SPSB3    | ENSG00000162032 | -63   | 0.27 | 0.18 | 0.00072  | 0.088 | NA |
| chr16 | 87425137 | 87426677 | MAP1LC3B | ENSG00000140941 | 501   | 0.26 | 0.17 | 0.00081  | 0.095 | NA |
| chr16 | 1020219  | 1021303  | LMF1     | ENSG00000103227 | 199   | 0.38 | 0.26 | 0.00084  | 0.12  | NA |
| chr16 | 10479686 | 10480254 | ATF7IP2  | ENSG00000166669 | 58    | 0.38 | 0.21 | 0.00085  | 0.16  | NA |
| chr16 | 89894307 | 89895145 | SPIRE2   | ENSG00000204991 | -181  | 0.26 | 0.13 | 0.00098  | 0.13  | NA |
| chr16 | 2059326  | 2060032  | ZNF598   | ENSG00000167962 | 84    | 0.39 | 0.16 | 0.001    | 0.23  | NA |
| chr16 | 28565145 | 28565753 | CCDC101  | ENSG00000176476 | 202   | 0.29 | 0.14 | 0.001    | 0.15  | NA |
| chr16 | 81348350 | 81349526 | GAN      | ENSG00000127688 | 363   | 0.48 | 0.22 | 0.001    | 0.27  | NA |
| chr16 | 3284639  | 3285511  | ZNF200   | ENSG00000010539 | 100   | 0.28 | 0.14 | 0.0011   | 0.14  | NA |
| chr16 | 67840275 | 67841106 | RANBP10  | ENSG00000141084 | -230  | 0.38 | 0.19 | 0.0012   | 0.19  | NA |
| chr16 | 711065   | 711414   | WDR90    | ENSG00000161996 | 174   | 0.71 | 0.3  | 0.0013   | 0.41  | NA |
| chr16 | 3095600  | 3097033  | MMP25    | ENSG00000008516 | -366  | 0.3  | 0.18 | 0.0014   | 0.12  | NA |
| chr16 | 68572891 | 68573740 | ZFP90    | ENSG00000184939 | -346  | 0.34 | 0.18 | 0.0014   | 0.17  | NA |
| chr16 | 1358729  | 1360232  | UBE2I    | ENSG00000103275 | 316   | 0.33 | 0.22 | 0.0015   | 0.11  | NA |
| chr16 | 71841923 | 71843101 | AP1G1    | ENSG00000166747 | 221   | 0.31 | 0.17 | 0.0015   | 0.14  | NA |

|       |          |          |               |                 |       |      |      |        |       |    |
|-------|----------|----------|---------------|-----------------|-------|------|------|--------|-------|----|
| chr16 | 755037   | 756696   | FBXL16        | ENSG00000127585 | -58   | 0.32 | 0.21 | 0.0016 | 0.11  | NA |
| chr16 | 30772530 | 30774003 | C16orf93      | ENSG00000196118 | -197  | 0.24 | 0.15 | 0.0016 | 0.081 | NA |
| chr16 | 79632619 | 79635537 | MAF           | ENSG00000178573 | 533   | 0.31 | 0.22 | 0.0017 | 0.083 | NA |
| chr16 | 83932382 | 83933411 | MLYCD         | ENSG00000103150 | 166   | 0.27 | 0.15 | 0.0017 | 0.12  | NA |
| chr16 | 2478686  | 2479968  | CCNF          | ENSG00000162063 | -93   | 0.32 | 0.21 | 0.0018 | 0.11  | NA |
| chr16 | 21512854 | 21513971 | CTD-2547E10.2 | ENSG00000180747 | -205  | 0.25 | 0.1  | 0.0018 | 0.14  | NA |
| chr16 | 84733163 | 84734028 | USP10         | ENSG00000103194 | 40    | 0.31 | 0.17 | 0.0022 | 0.14  | NA |
| chr16 | 6068914  | 6070401  | RBFOX1        | ENSG00000078328 | 562   | 0.27 | 0.17 | 0.0024 | 0.093 | NA |
| chr16 | 15187935 | 15188329 | RRN3          | ENSG00000085721 | -26   | 0.29 | 0.1  | 0.0024 | 0.2   | NA |
| chr16 | 58549027 | 58550016 | SETD6         | ENSG00000103037 | 138   | 0.42 | 0.19 | 0.0024 | 0.24  | NA |
| chr16 | 2255168  | 2255828  | MLST8         | ENSG00000167965 | 260   | 0.32 | 0.17 | 0.0025 | 0.15  | NA |
| chr16 | 68013967 | 68014545 | DPEP3         | ENSG00000141096 | 457   | 0.82 | 0.68 | 0.0025 | 0.14  | NA |
| chr16 | 31469982 | 31471302 | ARMC5         | ENSG00000140691 | 374   | 0.22 | 0.34 | 0.0026 | -0.12 | NA |
| chr16 | 58059380 | 58061477 | MMP15         | ENSG00000102996 | 958   | 0.26 | 0.17 | 0.0026 | 0.088 | NA |
| chr16 | 84001805 | 84002011 | NECAB2        | ENSG00000103154 | -323  | 0.5  | 0.11 | 0.0027 | 0.39  | NA |
| chr16 | 420489   | 420736   | MRPL28        | ENSG00000086504 | -110  | 0.31 | 0.09 | 0.0029 | 0.22  | NA |
| chr16 | 48418902 | 48419901 | SIAH1         | ENSG00000196470 | -40   | 0.27 | 0.15 | 0.0035 | 0.12  | NA |
| chr16 | 69599437 | 69600736 | MIR1538       | ENSG00000223109 | -315  | 0.28 | 0.17 | 0.0035 | 0.11  | NA |
| chr16 | 1967799  | 1968970  | HS3ST6        | ENSG00000162040 | -153  | 0.31 | 0.2  | 0.0036 | 0.11  | NA |
| chr16 | 30134220 | 30134488 | MAPK3         | ENSG00000102882 | -65   | 0.15 | 0.3  | 0.0041 | -0.15 | NA |
| chr16 | 75466850 | 75467527 | CFDP1         | ENSG00000153774 | 195   | 0.29 | 0.13 | 0.0043 | 0.16  | NA |
| chr16 | 56225255 | 56226351 | GNAO1         | ENSG00000087258 | 501   | 0.27 | 0.17 | 0.0044 | 0.1   | NA |
| chr16 | 46655002 | 46655374 | SHCBP1        | ENSG00000171241 | 350   | 0.32 | 0.18 | 0.0045 | 0.14  | NA |
| chr16 | 330060   | 330994   | ARHGDI8       | ENSG00000242173 | 77    | 0.3  | 0.14 | 0.0046 | 0.15  | NA |
| chr16 | 24550618 | 24551723 | RBBP6         | ENSG00000122257 | 262   | 0.31 | 0.2  | 0.005  | 0.11  | NA |
| chr16 | 12994574 | 12997690 | SHISA9        | ENSG00000237515 | 677   | 0.25 | 0.19 | 0.0051 | 0.065 | NA |
| chr16 | 58662975 | 58664048 | CNOT1         | ENSG00000125107 | 237   | 0.3  | 0.18 | 0.0052 | 0.12  | NA |
| chr16 | 1029878  | 1035327  | AC009041.2    | ENSG00000223796 | -1330 | 0.45 | 0.4  | 0.0053 | 0.05  | NA |
| chr16 | 46917849 | 46918957 | GPT2          | ENSG00000166123 | 113   | 0.28 | 0.16 | 0.0053 | 0.12  | NA |
| chr16 | 85783862 | 85785131 | C16orf74      | ENSG00000154102 | 193   | 0.39 | 0.25 | 0.0053 | 0.14  | NA |

|       |          |          |            |                 |      |      |      |        |       |    |
|-------|----------|----------|------------|-----------------|------|------|------|--------|-------|----|
| chr16 | 23313239 | 23313946 | SCNN1B     | ENSG00000168447 | 1    | 0.32 | 0.19 | 0.0054 | 0.13  | NA |
| chr16 | 75656905 | 75657360 | ADAT1      | ENSG00000065457 | 47   | 0.4  | 0.26 | 0.0054 | 0.15  | NA |
| chr16 | 77224168 | 77225143 | MON1B      | ENSG00000103111 | -164 | 0.33 | 0.23 | 0.0055 | 0.11  | NA |
| chr16 | 67193546 | 67194039 | TRADD      | ENSG00000102871 | -3   | 0.35 | 0.18 | 0.0058 | 0.17  | NA |
| chr16 | 11038164 | 11038763 | CLEC16A    | ENSG00000038532 | 118  | 0.22 | 0.13 | 0.0065 | 0.089 | NA |
| chr16 | 89939432 | 89940812 | TCF25      | ENSG00000141002 | 152  | 0.32 | 0.22 | 0.0065 | 0.099 | NA |
| chr16 | 4986167  | 4987533  | PPL        | ENSG00000118898 | 286  | 0.26 | 0.16 | 0.0067 | 0.092 | NA |
| chr16 | 57496476 | 57497038 | POLR2C     | ENSG00000102978 | 458  | 0.28 | 0.13 | 0.0067 | 0.15  | NA |
| chr16 | 58497033 | 58498595 | NDRG4      | ENSG00000103034 | 208  | 0.25 | 0.17 | 0.0067 | 0.085 | NA |
| chr16 | 69760293 | 69760506 | NQO1       | ENSG00000181019 | 50   | 0.31 | 0.14 | 0.0069 | 0.16  | NA |
| chr16 | 29823163 | 29823906 | AC009133.1 | ENSG00000238045 | -175 | 0.26 | 0.15 | 0.007  | 0.1   | NA |
| chr16 | 2033492  | 2034800  | GFER       | ENSG00000127554 | -4   | 0.27 | 0.18 | 0.0071 | 0.086 | NA |
| chr16 | 88772237 | 88773195 | RNF166     | ENSG00000158717 | 84   | 0.3  | 0.2  | 0.0072 | 0.1   | NA |
| chr16 | 10673880 | 10674735 | EMP2       | ENSG00000213853 | 182  | 0.28 | 0.19 | 0.0079 | 0.093 | NA |
| chr16 | 18812387 | 18813399 | ARL6IP1    | ENSG00000170540 | -201 | 0.28 | 0.14 | 0.008  | 0.13  | NA |
| chr16 | 68001916 | 68002462 | SLC12A4    | ENSG00000124067 | 336  | 0.38 | 0.2  | 0.0081 | 0.18  | NA |
| chr16 | 2826761  | 2827795  | TCEB2      | ENSG00000103363 | -150 | 0.25 | 0.16 | 0.0083 | 0.088 | NA |
| chr16 | 30621000 | 30621826 | ZNF689     | ENSG00000156853 | 282  | 0.19 | 0.11 | 0.0086 | 0.072 | NA |
| chr16 | 71323115 | 71323514 | FTSJD1     | ENSG00000180917 | 195  | 0.35 | 0.21 | 0.0087 | 0.14  | NA |
| chr16 | 75284680 | 75285821 | BCAR1      | ENSG00000050820 | 257  | 0.32 | 0.21 | 0.0089 | 0.11  | NA |
| chr16 | 6533019  | 6533983  | RBFOX1     | ENSG00000078328 | 321  | 0.41 | 0.21 | 0.0093 | 0.21  | NA |
| chr16 | 55357521 | 55359040 | IRX6       | ENSG00000159387 | -191 | 0.26 | 0.17 | 0.0099 | 0.082 | NA |
| chr16 | 2198455  | 2199129  | RAB26      | ENSG00000167964 | 167  | 0.3  | 0.16 | 0.01   | 0.13  | NA |
| chr16 | 4896606  | 4898243  | GLYR1      | ENSG00000140632 | -142 | 0.23 | 0.17 | 0.011  | 0.063 | NA |
| chr16 | 19729194 | 19729896 | C16orf88   | ENSG00000103550 | -53  | 0.29 | 0.17 | 0.011  | 0.13  | NA |
| chr16 | 86612188 | 86613821 | FOXL1      | ENSG00000176678 | 889  | 0.35 | 0.27 | 0.011  | 0.079 | NA |
| chr16 | 1363813  | 1364496  | UBE2I      | ENSG00000103275 | 158  | 0.89 | 0.66 | 0.012  | 0.23  | NA |
| chr16 | 19079070 | 19079388 | COQ7       | ENSG00000167186 | -10  | 0.25 | 0.13 | 0.012  | 0.12  | NA |
| chr16 | 3766977  | 3767935  | TRAP1      | ENSG00000126602 | 58   | 0.28 | 0.16 | 0.013  | 0.13  | NA |
| chr16 | 66729825 | 66731262 | CMTM4      | ENSG00000183723 | 67   | 0.31 | 0.23 | 0.013  | 0.082 | NA |

|       |          |          |            |                 |      |      |      |       |        |    |
|-------|----------|----------|------------|-----------------|------|------|------|-------|--------|----|
| chr16 | 82660651 | 82661813 | CDH13      | ENSG00000140945 | 569  | 0.32 | 0.19 | 0.013 | 0.13   | NA |
| chr16 | 87799123 | 87799747 | KLHDC4     | ENSG00000104731 | 163  | 0.28 | 0.17 | 0.013 | 0.11   | NA |
| chr16 | 701828   | 702037   | WDR90      | ENSG00000161996 | -190 | 0.85 | 0.94 | 0.014 | -0.088 | NA |
| chr16 | 1583809  | 1584641  | TMEM204    | ENSG00000131634 | -6   | 0.84 | 0.91 | 0.014 | -0.074 | NA |
| chr16 | 3550773  | 3551274  | CLUAP1     | ENSG00000103351 | 60   | 0.27 | 0.17 | 0.014 | 0.099  | NA |
| chr16 | 30709274 | 30710364 | SRCAP      | ENSG00000080603 | 289  | 0.31 | 0.51 | 0.014 | -0.2   | NA |
| chr16 | 77468309 | 77469074 | ADAMTS18   | ENSG00000140873 | 240  | 0.22 | 0.12 | 0.014 | 0.1    | NA |
| chr16 | 57480995 | 57481666 | COQ9       | ENSG00000088682 | -72  | 0.44 | 0.28 | 0.015 | 0.16   | NA |
| chr16 | 57569848 | 57570844 | CCDC102A   | ENSG00000135736 | 165  | 0.33 | 0.22 | 0.015 | 0.11   | NA |
| chr16 | 84538884 | 84539115 | KIAA1609   | ENSG00000140950 | -703 | 0.49 | 0.3  | 0.015 | 0.19   | NA |
| chr16 | 1537699  | 1537927  | PTX4       | ENSG00000251692 | 655  | 0.76 | 0.88 | 0.016 | -0.12  | NA |
| chr16 | 28073817 | 28075296 | GSG1L      | ENSG00000169181 | 274  | 0.26 | 0.34 | 0.016 | -0.084 | NA |
| chr16 | 29801696 | 29802545 | KIF22      | ENSG00000079616 | 79   | 0.23 | 0.14 | 0.016 | 0.088  | NA |
| chr16 | 451474   | 452132   | DECR2      | ENSG00000242612 | -23  | 0.3  | 0.17 | 0.017 | 0.13   | NA |
| chr16 | 56484865 | 56485774 | NUDT21     | ENSG00000167005 | -73  | 0.24 | 0.14 | 0.017 | 0.1    | NA |
| chr16 | 57219486 | 57220583 | FAM192A    | ENSG00000172775 | -58  | 0.3  | 0.18 | 0.017 | 0.11   | NA |
| chr16 | 66968029 | 66968924 | FAM96B     | ENSG00000166595 | -156 | 0.28 | 0.18 | 0.017 | 0.1    | NA |
| chr16 | 77822375 | 77823134 | VAT1L      | ENSG00000171724 | 271  | 0.33 | 0.19 | 0.017 | 0.14   | NA |
| chr16 | 74330533 | 74331314 | PSMD7      | ENSG00000103035 | 250  | 0.29 | 0.14 | 0.019 | 0.14   | NA |
| chr16 | 81069532 | 81070163 | ATMIN      | ENSG00000166454 | 389  | 0.29 | 0.16 | 0.019 | 0.13   | NA |
| chr16 | 609772   | 611178   | C16orf11   | ENSG00000161992 | 53   | 0.22 | 0.15 | 0.02  | 0.074  | NA |
| chr16 | 4400955  | 4401572  | PAM16      | ENSG00000217930 | 110  | 0.28 | 0.17 | 0.022 | 0.11   | NA |
| chr16 | 71928861 | 71929953 | KIAA0174   | ENSG00000182149 | 255  | 0.26 | 0.17 | 0.022 | 0.095  | NA |
| chr16 | 30669107 | 30671155 | FBR3       | ENSG00000156860 | -158 | 0.29 | 0.22 | 0.023 | 0.073  | NA |
| chr16 | 691597   | 692700   | AL022341.1 | ENSG00000197727 | -460 | 0.28 | 0.19 | 0.023 | 0.087  | NA |
| chr16 | 31159576 | 31160009 | PRSS36     | ENSG00000178226 | 1595 | 0.22 | 0.33 | 0.023 | -0.11  | NA |
| chr16 | 69139628 | 69141900 | HAS3       | ENSG00000103044 | 604  | 0.26 | 0.19 | 0.023 | 0.069  | NA |
| chr16 | 71756949 | 71758166 | PHLPP2     | ENSG00000040199 | 158  | 0.22 | 0.15 | 0.023 | 0.071  | NA |
| chr16 | 619805   | 620195   | PIGQ       | ENSG00000007541 | 53   | 0.25 | 0.15 | 0.024 | 0.1    | NA |
| chr16 | 11035496 | 11036696 | DEXI       | ENSG00000182108 | -108 | 0.25 | 0.17 | 0.025 | 0.079  | NA |



|       |          |          |                |                 |       |      |      |       |       |    |
|-------|----------|----------|----------------|-----------------|-------|------|------|-------|-------|----|
| chr16 | 28375790 | 28376407 | RP11-57A19.3   | ENSG00000198156 | -1269 | 0.2  | 0.67 | 0.025 | -0.47 | NA |
| chr16 | 87416583 | 87418238 | FBXO31         | ENSG00000103264 | -16   | 0.36 | 0.25 | 0.025 | 0.12  | NA |
| chr16 | 72042347 | 72042888 | DHODH          | ENSG00000102967 | -26   | 0.24 | 0.15 | 0.028 | 0.09  | NA |
| chr16 | 2569559  | 2571071  | AMDHD2         | ENSG00000162066 | -48   | 0.34 | 0.26 | 0.029 | 0.082 | NA |
| chr16 | 23765969 | 23766869 | AC130454.2     | ENSG00000166869 | 471   | 0.32 | 0.23 | 0.029 | 0.092 | NA |
| chr16 | 2165378  | 2165620  | PKD1           | ENSG00000008710 | -1374 | 0.88 | 0.55 | 0.03  | 0.33  | NA |
| chr16 | 24740666 | 24741802 | TNRC6A         | ENSG00000090905 | 218   | 0.27 | 0.18 | 0.03  | 0.091 | NA |
| chr16 | 21610692 | 21611694 | AC005632.1     | ENSG00000245927 | -487  | 0.3  | 0.22 | 0.031 | 0.086 | NA |
| chr16 | 103424   | 104190   | POLR3K         | ENSG00000161980 | -179  | 0.3  | 0.2  | 0.032 | 0.11  | NA |
| chr16 | 68027074 | 68027396 | DPEP2          | ENSG00000167261 | -120  | 0.52 | 0.26 | 0.032 | 0.26  | NA |
| chr16 | 74700305 | 74701005 | RFWD3          | ENSG00000168411 | 124   | 0.21 | 0.36 | 0.032 | -0.15 | NA |
| chr16 | 76668835 | 76669152 | AC108125.1     | ENSG00000250514 | 98    | 0.97 | 0.87 | 0.032 | 0.1   | NA |
| chr16 | 89988830 | 89989746 | TUBB3          | ENSG00000198211 | -399  | 0.26 | 0.16 | 0.032 | 0.092 | NA |
| chr16 | 717931   | 719064   | RHOT2          | ENSG00000140983 | 411   | 0.25 | 0.17 | 0.033 | 0.07  | NA |
| chr16 | 29262896 | 29263126 | RUNDC2C        | ENSG00000198106 | 182   | 0.14 | 1    | 0.034 | -0.86 | NA |
| chr16 | 85722209 | 85722941 | GINS2          | ENSG00000131153 | 30    | 0.38 | 0.24 | 0.035 | 0.14  | NA |
| chr16 | 18487934 | 18488547 | RP11-1212A22.1 | ENSG00000205746 | 156   | 0.91 | 0.65 | 0.036 | 0.27  | NA |
| chr16 | 764748   | 765994   | METR1          | ENSG00000103260 | 209   | 0.24 | 0.17 | 0.037 | 0.077 | NA |
| chr16 | 11836073 | 11837092 | TXNDC11        | ENSG00000153066 | 66    | 0.21 | 0.15 | 0.04  | 0.055 | NA |
| chr16 | 24267040 | 24267527 | CACNG3         | ENSG00000006116 | 409   | 0.26 | 0.13 | 0.04  | 0.13  | NA |
| chr16 | 52581293 | 52581610 | TOX3           | ENSG00000103460 | 263   | 0.39 | 0.22 | 0.042 | 0.16  | NA |
| chr16 | 89723192 | 89724636 | CHMP1A         | ENSG00000131165 | 99    | 0.25 | 0.18 | 0.042 | 0.073 | NA |
| chr16 | 740007   | 740578   | WDR24          | ENSG00000127580 | 108   | 0.28 | 0.18 | 0.043 | 0.098 | NA |
| chr16 | 25078047 | 25078532 | AC133552.1     | ENSG00000245776 | 31    | 0.34 | 0.2  | 0.043 | 0.14  | NA |
| chr16 | 67183208 | 67184968 | B3GNT9         | ENSG00000237172 | 300   | 0.47 | 0.41 | 0.043 | 0.06  | NA |
| chr16 | 57278758 | 57279377 | ARL2BP         | ENSG00000102931 | 57    | 0.35 | 0.26 | 0.044 | 0.098 | NA |
| chr16 | 843069   | 843391   | CHTF18         | ENSG00000127586 | 706   | 0.98 | 0.9  | 0.045 | 0.08  | NA |
| chr16 | 2765619  | 2765855  | PRSS27         | ENSG00000172382 | -171  | 0.64 | 0.9  | 0.046 | -0.26 | NA |
| chr16 | 86541430 | 86545228 | AC009108.1     | ENSG00000246979 | -888  | 0.27 | 0.22 | 0.047 | 0.047 | NA |
| chr16 | 2301157  | 2301969  | ECI1           | ENSG00000167969 | 52    | 0.3  | 0.2  | 0.049 | 0.093 | NA |

|       |          |          |            |                 |       |      |      |       |        |    |
|-------|----------|----------|------------|-----------------|-------|------|------|-------|--------|----|
| chr16 | 226173   | 227254   | HBA1       | ENSG00000206172 | 34    | 1    | 0.17 | 0.051 | 0.83   | NA |
| chr16 | 85832420 | 85833842 | COX4NB     | ENSG00000131148 | 15    | 0.23 | 0.17 | 0.052 | 0.057  | NA |
| chr16 | 66864407 | 66864991 | NAE1       | ENSG00000159593 | 180   | 0.24 | 0.38 | 0.053 | -0.14  | NA |
| chr16 | 30582736 | 30583833 | AC002310.7 | ENSG00000239791 | -287  | 0.28 | 0.15 | 0.056 | 0.13   | NA |
| chr16 | 47006827 | 47008029 | DNAJA2     | ENSG00000069345 | 197   | 0.28 | 0.19 | 0.057 | 0.09   | NA |
| chr16 | 21831482 | 21831944 | RRN3P2     | ENSG00000248124 | -8    | 0.33 | 1    | 0.058 | -0.67  | NA |
| chr16 | 57023190 | 57023768 | NLRC5      | ENSG00000140853 | 82    | 0.34 | 0.22 | 0.059 | 0.12   | NA |
| chr16 | 2771081  | 2771365  | PRSS27     | ENSG00000172382 | -1007 | 0.75 | 0.22 | 0.061 | 0.53   | NA |
| chr16 | 5147250  | 5148840  | FAM86A     | ENSG00000118894 | -256  | 0.19 | 0.29 | 0.061 | -0.098 | NA |
| chr16 | 89555775 | 89557753 | ANKRD11    | ENSG00000167522 | -38   | 0.28 | 0.21 | 0.061 | 0.064  | NA |
| chr16 | 90038530 | 90039583 | CENPBD1    | ENSG00000177946 | -114  | 0.24 | 0.16 | 0.062 | 0.079  | NA |
| chr16 | 11762563 | 11763246 | SNN        | ENSG00000184602 | 634   | 0.2  | 0.28 | 0.063 | -0.08  | NA |
| chr16 | 69220880 | 69222107 | SNTB2      | ENSG00000168807 | 461   | 0.25 | 0.17 | 0.063 | 0.084  | NA |
| chr16 | 75563113 | 75564112 | CHST5      | ENSG00000135702 | 1926  | 0.99 | 0.96 | 0.063 | 0.033  | NA |
| chr16 | 832827   | 833042   | MSLNL      | ENSG00000162006 | -8    | 0.33 | 0.53 | 0.064 | -0.2   | NA |
| chr16 | 20817500 | 20818514 | AC004381.6 | ENSG00000005189 | 240   | 0.35 | 0.24 | 0.064 | 0.11   | NA |
| chr16 | 75497828 | 75498780 | TMEM170A   | ENSG00000166822 | 280   | 0.32 | 0.19 | 0.066 | 0.13   | NA |
| chr16 | 88788033 | 88789440 | FAM38A     | ENSG00000103335 | -1584 | 0.9  | 0.95 | 0.066 | -0.045 | NA |
| chr16 | 8768256  | 8768619  | ABAT       | ENSG00000183044 | 15    | 0.23 | 0.15 | 0.067 | 0.079  | NA |
| chr16 | 5083244  | 5084032  | NAGPA      | ENSG00000103174 | 297   | 0.22 | 0.14 | 0.07  | 0.074  | NA |
| chr16 | 8891322  | 8891928  | TMEM186    | ENSG00000184857 | -120  | 0.16 | 0.23 | 0.07  | -0.074 | NA |
| chr16 | 49314037 | 49316543 | CBLN1      | ENSG00000102924 | 183   | 0.23 | 0.19 | 0.07  | 0.042  | NA |
| chr16 | 2770137  | 2770500  | PRSS27     | ENSG00000172382 | -102  | 0.94 | 0.79 | 0.071 | 0.14   | NA |
| chr16 | 30087236 | 30087842 | PPP4C      | ENSG00000149923 | 228   | 0.36 | 0.24 | 0.071 | 0.13   | NA |
| chr16 | 4587836  | 4588890  | C16orf5    | ENSG00000089486 | 453   | 0.28 | 0.21 | 0.072 | 0.065  | NA |
| chr16 | 50775625 | 50776629 | CYLD       | ENSG00000083799 | 166   | 0.36 | 0.25 | 0.072 | 0.12   | NA |
| chr16 | 67204208 | 67204637 | NOL3       | ENSG00000140939 | 17    | 0.26 | 0.4  | 0.072 | -0.14  | NA |
| chr16 | 68676450 | 68676843 | CDH3       | ENSG00000062038 | -1505 | 0.3  | 0.21 | 0.072 | 0.096  | NA |
| chr16 | 89882392 | 89883458 | FANCA      | ENSG00000187741 | 138   | 0.3  | 0.22 | 0.072 | 0.084  | NA |
| chr16 | 2069718  | 2070865  | NPW        | ENSG00000183971 | 770   | 0.25 | 0.17 | 0.073 | 0.088  | NA |

|       |          |          |            |                 |      |      |      |       |        |    |
|-------|----------|----------|------------|-----------------|------|------|------|-------|--------|----|
| chr16 | 29816247 | 29817272 | MAZ        | ENSG00000103495 | -668 | 0.15 | 0.28 | 0.075 | -0.13  | NA |
| chr16 | 46864453 | 46865561 | C16orf87   | ENSG00000155330 | 67   | 0.23 | 0.14 | 0.075 | 0.083  | NA |
| chr16 | 278838   | 279495   | LUC7L      | ENSG00000007392 | -177 | 0.27 | 0.17 | 0.078 | 0.098  | NA |
| chr16 | 850227   | 850806   | GNG13      | ENSG00000127588 | 208  | 0.3  | 0.21 | 0.078 | 0.094  | NA |
| chr16 | 53536501 | 53537685 | AKTIP      | ENSG00000166971 | 70   | 0.25 | 0.19 | 0.079 | 0.063  | NA |
| chr16 | 89641053 | 89643415 | CPNE7      | ENSG00000178773 | 59   | 0.32 | 0.28 | 0.079 | 0.045  | NA |
| chr16 | 30381077 | 30381952 | TBC1D10B   | ENSG00000169221 | 71   | 0.22 | 0.13 | 0.081 | 0.086  | NA |
| chr16 | 75182243 | 75182846 | ZFP1       | ENSG00000184517 | 123  | 0.15 | 0.27 | 0.082 | -0.13  | NA |
| chr16 | 85061182 | 85061802 | KIAA0513   | ENSG00000135709 | 117  | 0.3  | 0.22 | 0.083 | 0.084  | NA |
| chr16 | 633867   | 634143   | PIGQ       | ENSG00000007541 | 1515 | 0.44 | 0.56 | 0.085 | -0.12  | NA |
| chr16 | 81478214 | 81479350 | AC092135.1 | ENSG00000153815 | 7    | 0.23 | 0.16 | 0.086 | 0.075  | NA |
| chr16 | 460245   | 460778   | DECR2      | ENSG00000242612 | 399  | 0.92 | 0.96 | 0.088 | -0.041 | NA |
| chr16 | 31225956 | 31228264 | PYDC1      | ENSG00000169900 | 1304 | 0.25 | 0.17 | 0.09  | 0.077  | NA |
| chr16 | 55513220 | 55513526 | MMP2       | ENSG00000087245 | 490  | 0.31 | 0.13 | 0.096 | 0.18   | NA |
| chr16 | 4321258  | 4321505  | TFAP4      | ENSG00000090447 | 1620 | 0.3  | 0.13 | 0.097 | 0.17   | NA |
| chr16 | 1992668  | 1993646  | SEPX1      | ENSG00000198736 | -33  | 0.27 | 0.2  | 0.098 | 0.067  | NA |
| chr16 | 89167116 | 89167482 | ACSF3      | ENSG00000176715 | 221  | 0.87 | 0.94 | 0.098 | -0.073 | NA |
| chr16 | 30107511 | 30107875 | YPEL3      | ENSG00000090238 | -172 | 0.25 | 0.15 | 0.099 | 0.1    | NA |
| chr16 | 81129361 | 81130218 | GCSH       | ENSG00000140905 | 219  | 0.38 | 0.21 | 0.099 | 0.17   | NA |
| chr16 | 1706695  | 1706941  | CRAMP1L    | ENSG00000007545 | 905  | 0.9  | 0.74 | 0.1   | 0.16   | NA |
| chr16 | 27214772 | 27215678 | JMJD5      | ENSG00000155666 | 418  | 0.24 | 0.18 | 0.1   | 0.056  | NA |
| chr16 | 67208067 | 67208678 | NOL3       | ENSG00000140939 | 502  | 0.28 | 0.19 | 0.1   | 0.083  | NA |
| chr16 | 67312896 | 67313731 | PLEKHG4    | ENSG00000196155 | 263  | 0.26 | 0.19 | 0.1   | 0.078  | NA |
| chr16 | 69363597 | 69364835 | COG8       | ENSG00000213380 | 282  | 0.22 | 0.16 | 0.1   | 0.055  | NA |
| chr16 | 75681264 | 75682579 | KARS       | ENSG00000065427 | -358 | 0.24 | 0.19 | 0.1   | 0.049  | NA |
| chr16 | 88706211 | 88706492 | IL17C      | ENSG00000124391 | 1350 | 0.4  | 0.57 | 0.1   | -0.17  | NA |
| chr16 | 1463762  | 1464716  | UNKL       | ENSG00000059145 | 453  | 0.18 | 0.24 | 0.11  | -0.065 | NA |
| chr16 | 27279886 | 27280243 | NSMCE1     | ENSG00000169189 | 32   | 0.22 | 0.11 | 0.11  | 0.1    | NA |
| chr16 | 28857204 | 28858139 | TUFM       | ENSG00000178952 | 58   | 0.21 | 0.3  | 0.11  | -0.089 | NA |
| chr16 | 31483276 | 31483646 | TGFB11     | ENSG00000140682 | 67   | 0.32 | 0.18 | 0.11  | 0.14   | NA |

|       |          |          |            |                 |       |      |      |      |        |    |
|-------|----------|----------|------------|-----------------|-------|------|------|------|--------|----|
| chr16 | 56965734 | 56966476 | HERPUD1    | ENSG00000051108 | 357   | 0.22 | 0.14 | 0.11 | 0.082  | NA |
| chr16 | 68344306 | 68345246 | SLC7A6OS   | ENSG00000103061 | 72    | 0.33 | 0.24 | 0.11 | 0.095  | NA |
| chr16 | 84681760 | 84682732 | KLHL36     | ENSG00000135686 | 139   | 0.25 | 0.17 | 0.11 | 0.078  | NA |
| chr16 | 1727939  | 1728858  | HN1L       | ENSG00000206053 | 141   | 0.3  | 0.19 | 0.12 | 0.11   | NA |
| chr16 | 11680008 | 11681275 | LITAF      | ENSG00000189067 | -412  | 0.26 | 0.21 | 0.12 | 0.058  | NA |
| chr16 | 30418557 | 30419272 | ZNF771     | ENSG00000179965 | 179   | 0.17 | 0.23 | 0.12 | -0.056 | NA |
| chr16 | 31724651 | 31725071 | ZNF720     | ENSG00000197302 | 234   | 0.22 | 0.15 | 0.12 | 0.075  | NA |
| chr16 | 67188613 | 67189652 | TRADD      | ENSG00000102871 | 1020  | 0.39 | 0.33 | 0.12 | 0.068  | NA |
| chr16 | 69458264 | 69458626 | CYB5B      | ENSG00000103018 | 17    | 0.26 | 0.16 | 0.12 | 0.1    | NA |
| chr16 | 85644089 | 85644323 | KIAA0182   | ENSG00000131149 | -817  | 0.5  | 0.15 | 0.12 | 0.35   | NA |
| chr16 | 88752520 | 88753278 | SNAI3      | ENSG00000185669 | -17   | 0.28 | 0.15 | 0.12 | 0.13   | NA |
| chr16 | 88922671 | 88923976 | GALNS      | ENSG00000141012 | -38   | 0.35 | 0.23 | 0.12 | 0.12   | NA |
| chr16 | 2273219  | 2274081  | E4F1       | ENSG00000167967 | 83    | 0.23 | 0.17 | 0.13 | 0.06   | NA |
| chr16 | 3013016  | 3013228  | KREMEN2    | ENSG00000131650 | -1038 | 0.19 | 0.4  | 0.13 | -0.21  | NA |
| chr16 | 4743043  | 4744231  | NUDT16L1   | ENSG00000168101 | -58   | 0.3  | 0.24 | 0.13 | 0.057  | NA |
| chr16 | 30102816 | 30103695 | TBX6       | ENSG00000149922 | -50   | 0.19 | 0.14 | 0.13 | 0.046  | NA |
| chr16 | 46722564 | 46724107 | VPS35      | ENSG00000069329 | -245  | 0.32 | 0.23 | 0.13 | 0.091  | NA |
| chr16 | 70488358 | 70488814 | FUK        | ENSG00000157353 | 88    | 0.24 | 0.16 | 0.13 | 0.072  | NA |
| chr16 | 30406290 | 30407290 | ZNF48      | ENSG00000180035 | 357   | 0.26 | 0.2  | 0.14 | 0.06   | NA |
| chr16 | 67752849 | 67753446 | GFOD2      | ENSG00000141098 | 177   | 0.35 | 0.23 | 0.14 | 0.11   | NA |
| chr16 | 88877712 | 88878936 | APRT       | ENSG00000198931 | 18    | 0.37 | 0.26 | 0.14 | 0.11   | NA |
| chr16 | 30661983 | 30663253 | PRR14      | ENSG00000156858 | 395   | 0.25 | 0.3  | 0.15 | -0.056 | NA |
| chr16 | 34256748 | 34257750 | AC135776.1 | ENSG00000179755 | 742   | 0.79 | 0.73 | 0.15 | 0.055  | NA |
| chr16 | 47176787 | 47178446 | NETO2      | ENSG00000171208 | 292   | 0.21 | 0.18 | 0.15 | 0.034  | NA |
| chr16 | 1827104  | 1827405  | SPSB3      | ENSG00000162032 | 988   | 0.67 | 0.77 | 0.16 | -0.11  | NA |
| chr16 | 2961641  | 2962532  | FLYWCH1    | ENSG00000059122 | 106   | 0.29 | 0.2  | 0.16 | 0.089  | NA |
| chr16 | 11369939 | 11370221 | PRM2       | ENSG00000122304 | 257   | 0.91 | 0.97 | 0.16 | -0.066 | NA |
| chr16 | 20084707 | 20085305 | GPR139     | ENSG00000180269 | 83    | 0.38 | 0.26 | 0.16 | 0.13   | NA |
| chr16 | 20752646 | 20753280 | THUMPD1    | ENSG00000066654 | 236   | 0.31 | 0.21 | 0.16 | 0.097  | NA |
| chr16 | 31438891 | 31439682 | COX6A2     | ENSG00000156885 | 445   | 0.2  | 0.3  | 0.16 | -0.11  | NA |

|       |          |          |            |                 |      |      |      |      |        |    |
|-------|----------|----------|------------|-----------------|------|------|------|------|--------|----|
| chr16 | 57768817 | 57769100 | KATNB1     | ENSG00000140854 | -684 | 0.33 | 0.18 | 0.16 | 0.14   | NA |
| chr16 | 58767447 | 58768328 | GOT2       | ENSG00000125166 | 297  | 0.31 | 0.24 | 0.16 | 0.07   | NA |
| chr16 | 66835271 | 66835790 | CCDC79     | ENSG00000177461 | -7   | 0.99 | 0.92 | 0.16 | 0.064  | NA |
| chr16 | 66958733 | 66959655 | RRAD       | ENSG00000166592 | 245  | 0.2  | 0.27 | 0.16 | -0.063 | NA |
| chr16 | 67700009 | 67701354 | C16orf48   | ENSG00000124074 | -14  | 0.24 | 0.2  | 0.16 | 0.041  | NA |
| chr16 | 89786837 | 89789089 | ZNF276     | ENSG00000158805 | 570  | 0.23 | 0.2  | 0.16 | 0.032  | NA |
| chr16 | 21289419 | 21289819 | CRYM       | ENSG00000103316 | 22   | 0.3  | 0.21 | 0.17 | 0.088  | NA |
| chr16 | 28223083 | 28223638 | XPO6       | ENSG00000169180 | -170 | 0.35 | 0.24 | 0.17 | 0.11   | NA |
| chr16 | 30064200 | 30064678 | ALDOA      | ENSG00000149925 | -5   | 0.17 | 0.27 | 0.17 | -0.091 | NA |
| chr16 | 33964362 | 33966423 | 5_8S_rRNA  | ENSG00000200434 | -34  | 0.53 | 0.51 | 0.17 | 0.017  | NA |
| chr16 | 56677120 | 56677598 | MT1DP      | ENSG00000205361 | -240 | 0.41 | 0.31 | 0.17 | 0.099  | NA |
| chr16 | 58426183 | 58426865 | GINS3      | ENSG00000181938 | 226  | 0.21 | 0.15 | 0.17 | 0.057  | NA |
| chr16 | 80574741 | 80575090 | DYNLRB2    | ENSG00000168589 | 61   | 0.22 | 0.37 | 0.17 | -0.15  | NA |
| chr16 | 2653221  | 2653847  | AC141586.5 | ENSG00000215154 | 183  | 0.17 | 0.28 | 0.18 | -0.11  | NA |
| chr16 | 30535841 | 30536536 | ZNF768     | ENSG00000169957 | 1729 | 0.98 | 0.93 | 0.18 | 0.049  | NA |
| chr16 | 30968425 | 30969815 | SETD1A     | ENSG00000099381 | 505  | 0.2  | 0.17 | 0.18 | 0.035  | NA |
| chr16 | 4465874  | 4466889  | CORO7      | ENSG00000103426 | -483 | 0.2  | 0.24 | 0.19 | -0.043 | NA |
| chr16 | 10972782 | 10973305 | CIITA      | ENSG00000179583 | 1855 | 0.25 | 0.19 | 0.19 | 0.056  | NA |
| chr16 | 28502813 | 28503491 | CLN3       | ENSG00000188603 | 30   | 0.24 | 0.31 | 0.19 | -0.066 | NA |
| chr16 | 33961237 | 33962487 | AC136932.1 | ENSG00000207986 | 210  | 0.61 | 0.58 | 0.19 | 0.027  | NA |
| chr16 | 67926918 | 67927696 | PSKH1      | ENSG00000159792 | 132  | 0.14 | 0.21 | 0.19 | -0.061 | NA |
| chr16 | 214343   | 216720   | HBM        | ENSG00000206177 | 1050 | 0.4  | 0.3  | 0.2  | 0.11   | NA |
| chr16 | 20911566 | 20912616 | DCUN1D3    | ENSG00000188215 | -385 | 0.25 | 0.19 | 0.2  | 0.064  | NA |
| chr16 | 50583175 | 50583465 | NKD1       | ENSG00000140807 | 1079 | 0.46 | 0.24 | 0.2  | 0.23   | NA |
| chr16 | 53088716 | 53089279 | CHD9       | ENSG00000177200 | 52   | 0.27 | 0.37 | 0.2  | -0.098 | NA |
| chr16 | 70380639 | 70380999 | DDX19A     | ENSG00000168872 | 87   | 0.19 | 0.12 | 0.2  | 0.068  | NA |
| chr16 | 70557089 | 70557486 | COG4       | ENSG00000103051 | -184 | 0.15 | 0.4  | 0.2  | -0.25  | NA |
| chr16 | 87738617 | 87738851 | AC010536.1 | ENSG00000205047 | 556  | 0.5  | 0.13 | 0.2  | 0.37   | NA |
| chr16 | 1921897  | 1922426  | C16orf73   | ENSG00000162039 | -65  | 0.25 | 0.16 | 0.21 | 0.09   | NA |
| chr16 | 30441095 | 30441675 | DCTPP1     | ENSG00000179958 | 11   | 0.22 | 0.15 | 0.21 | 0.074  | NA |

|       |          |          |               |                 |       |      |      |      |        |    |
|-------|----------|----------|---------------|-----------------|-------|------|------|------|--------|----|
| chr16 | 1493499  | 1493773  | CCDC154       | ENSG00000197599 | 854   | 0.5  | 0.71 | 0.22 | -0.21  | NA |
| chr16 | 11761859 | 11762127 | SNN           | ENSG00000184602 | -277  | 0.29 | 0.49 | 0.22 | -0.2   | NA |
| chr16 | 14723602 | 14724048 | PARN          | ENSG00000140694 | 250   | 0.27 | 0.19 | 0.22 | 0.074  | NA |
| chr16 | 28634440 | 28635031 | SULT1A1       | ENSG00000196502 | 139   | 0.17 | 0.21 | 0.22 | -0.039 | NA |
| chr16 | 4674706  | 4675453  | MGRN1         | ENSG00000102858 | 253   | 0.21 | 0.24 | 0.23 | -0.039 | NA |
| chr16 | 56553529 | 56554075 | BBS2          | ENSG00000125124 | 206   | 0.31 | 0.21 | 0.23 | 0.096  | NA |
| chr16 | 682634   | 687106   | C16orf13      | ENSG00000249124 | 853   | 0.7  | 0.66 | 0.24 | 0.032  | NA |
| chr16 | 2021739  | 2022590  | TBL3          | ENSG00000183751 | 126   | 0.29 | 0.24 | 0.24 | 0.051  | NA |
| chr16 | 23463990 | 23464629 | COG7          | ENSG00000168434 | 192   | 0.24 | 0.18 | 0.24 | 0.063  | NA |
| chr16 | 30545524 | 30546513 | ZNF747        | ENSG00000169955 | 155   | 0.28 | 0.23 | 0.24 | 0.05   | NA |
| chr16 | 73091514 | 73092395 | ZFH3          | ENSG00000140836 | 580   | 0.43 | 0.25 | 0.24 | 0.18   | NA |
| chr16 | 89225687 | 89226195 | NCRNA00304    | ENSG00000180422 | 313   | 0.56 | 1    | 0.24 | -0.44  | NA |
| chr16 | 1705866  | 1706244  | CRAMP1L       | ENSG00000007545 | 142   | 0.9  | 0.94 | 0.25 | -0.041 | NA |
| chr16 | 14395604 | 14397075 | MIR193B       | ENSG00000207639 | -1485 | 0.21 | 0.27 | 0.25 | -0.054 | NA |
| chr16 | 23568398 | 23569488 | UBFD1         | ENSG00000103353 | 260   | 0.2  | 0.28 | 0.25 | -0.076 | NA |
| chr16 | 28936053 | 28937036 | RABEP2        | ENSG00000177548 | -27   | 0.26 | 0.22 | 0.25 | 0.045  | NA |
| chr16 | 29605964 | 29606945 | AC009086.1    | ENSG00000205534 | -59   | 0.19 | 0.12 | 0.25 | 0.071  | NA |
| chr16 | 72127129 | 72127341 | TXNL4B        | ENSG00000140830 | 315   | 0.41 | 0.25 | 0.25 | 0.16   | NA |
| chr16 | 9058063  | 9058265  | USP7          | ENSG00000187555 | -823  | 0.33 | 0.47 | 0.26 | -0.15  | NA |
| chr16 | 29937038 | 29937761 | KCTD13        | ENSG00000174943 | 150   | 0.22 | 0.28 | 0.26 | -0.066 | NA |
| chr16 | 30759403 | 30760320 | PHKG2         | ENSG00000156873 | 270   | 0.23 | 0.18 | 0.26 | 0.042  | NA |
| chr16 | 595847   | 596197   | SOLH          | ENSG00000103326 | -817  | 0.89 | 0.94 | 0.27 | -0.053 | NA |
| chr16 | 2509816  | 2510482  | C16orf59      | ENSG00000162062 | 62    | 0.2  | 0.15 | 0.27 | 0.045  | NA |
| chr16 | 67564058 | 67564332 | FAM65A        | ENSG00000039523 | 565   | 0.31 | 0.14 | 0.27 | 0.17   | NA |
| chr16 | 81110485 | 81111243 | C16orf46      | ENSG00000166455 | -60   | 0.29 | 0.22 | 0.27 | 0.067  | NA |
| chr16 | 89650417 | 89650697 | CPNE7         | ENSG00000178773 | -672  | 0.89 | 0.95 | 0.27 | -0.056 | NA |
| chr16 | 4852117  | 4853176  | ROGDI         | ENSG00000067836 | 305   | 0.32 | 0.27 | 0.28 | 0.053  | NA |
| chr16 | 16451347 | 16451960 | RP11-958N24.2 | ENSG00000227827 | 1572  | 0.89 | 0.78 | 0.28 | 0.11   | NA |
| chr16 | 30959765 | 30960865 | ORAI3         | ENSG00000175938 | -72   | 0.27 | 0.23 | 0.28 | 0.041  | NA |
| chr16 | 67143282 | 67143827 | C16orf70      | ENSG00000125149 | -361  | 0.39 | 0.22 | 0.28 | 0.17   | NA |

|       |          |          |            |                 |       |      |      |      |        |    |
|-------|----------|----------|------------|-----------------|-------|------|------|------|--------|----|
| chr16 | 88781806 | 88782517 | FAM38A     | ENSG00000103335 | 459   | 0.88 | 0.92 | 0.28 | -0.037 | NA |
| chr16 | 2097465  | 2098365  | TSC2       | ENSG00000103197 | 449   | 0.28 | 0.21 | 0.29 | 0.065  | NA |
| chr16 | 3086283  | 3086968  | CCDC64B    | ENSG00000162069 | -1083 | 0.29 | 0.23 | 0.29 | 0.06   | NA |
| chr16 | 28874665 | 28875558 | SH2B1      | ENSG00000178188 | 231   | 0.26 | 0.19 | 0.29 | 0.069  | NA |
| chr16 | 1535925  | 1536576  | AL031705.2 | ENSG00000167957 | 330   | 0.83 | 0.87 | 0.3  | -0.042 | NA |
| chr16 | 1876113  | 1877633  | HAGH       | ENSG00000063854 | -38   | 0.19 | 0.16 | 0.3  | 0.03   | NA |
| chr16 | 2867245  | 2868002  | PRSS21     | ENSG00000007038 | 395   | 0.68 | 0.79 | 0.3  | -0.11  | NA |
| chr16 | 3070095  | 3071305  | TNFRSF12A  | ENSG00000006327 | 387   | 0.23 | 0.19 | 0.3  | 0.041  | NA |
| chr16 | 4366358  | 4366982  | GLIS2      | ENSG00000126603 | 1908  | 0.25 | 0.19 | 0.3  | 0.054  | NA |
| chr16 | 29873918 | 29874516 | CDIPT      | ENSG00000103502 | 131   | 0.19 | 0.24 | 0.3  | -0.049 | NA |
| chr16 | 30389035 | 30390631 | ZNF48      | ENSG00000180035 | 406   | 0.34 | 0.3  | 0.3  | 0.044  | NA |
| chr16 | 66785040 | 66785875 | DYNC1LI2   | ENSG00000135720 | 40    | 0.26 | 0.2  | 0.3  | 0.059  | NA |
| chr16 | 84149912 | 84151110 | MBTPS1     | ENSG00000140943 | 37    | 0.21 | 0.18 | 0.3  | 0.031  | NA |
| chr16 | 427415   | 427832   | TMEM8A     | ENSG00000129925 | -1148 | 0.84 | 0.79 | 0.31 | 0.053  | NA |
| chr16 | 1820311  | 1823954  | NME3       | ENSG00000103024 | -422  | 0.25 | 0.23 | 0.31 | 0.027  | NA |
| chr16 | 4783862  | 4785010  | ANKS3      | ENSG00000168096 | -273  | 0.27 | 0.23 | 0.32 | 0.041  | NA |
| chr16 | 9057644  | 9057886  | USP7       | ENSG00000187555 | -424  | 0.29 | 0.21 | 0.32 | 0.081  | NA |
| chr16 | 29826662 | 29828302 | C16orf53   | ENSG00000185928 | 197   | 0.21 | 0.17 | 0.32 | 0.042  | NA |
| chr16 | 67693451 | 67695560 | ACD        | ENSG00000102977 | 141   | 0.23 | 0.2  | 0.32 | 0.029  | NA |
| chr16 | 1401334  | 1402348  | C16orf42   | ENSG00000007520 | 71    | 0.24 | 0.19 | 0.33 | 0.047  | NA |
| chr16 | 3313946  | 3314789  | ZNF263     | ENSG00000006194 | 567   | 0.24 | 0.2  | 0.33 | 0.041  | NA |
| chr16 | 9184146  | 9186689  | C16orf72   | ENSG00000182831 | -58   | 0.24 | 0.21 | 0.33 | 0.029  | NA |
| chr16 | 30456730 | 30457071 | SEPHS2     | ENSG00000179918 | 148   | 0.18 | 0.14 | 0.33 | 0.038  | NA |
| chr16 | 31072988 | 31073606 | AC135050.1 | ENSG00000232748 | 484   | 0.98 | 0.97 | 0.33 | 0.016  | NA |
| chr16 | 31190820 | 31192225 | FUS        | ENSG00000089280 | 77    | 0.39 | 0.29 | 0.33 | 0.096  | NA |
| chr16 | 68877358 | 68877817 | TMCO7      | ENSG00000103047 | 78    | 0.33 | 0.1  | 0.33 | 0.23   | NA |
| chr16 | 84002269 | 84002860 | NECAB2     | ENSG00000103154 | 333   | 0.32 | 0.26 | 0.33 | 0.059  | NA |
| chr16 | 89237944 | 89238331 | CDH15      | ENSG00000129910 | -38   | 0.22 | 0.13 | 0.33 | 0.095  | NA |
| chr16 | 419860   | 420256   | MRPL28     | ENSG00000086504 | 167   | 0.36 | 0.17 | 0.34 | 0.18   | NA |
| chr16 | 2009496  | 2009919  | NDUFB10    | ENSG00000140990 | 188   | 0.23 | 0.18 | 0.34 | 0.053  | NA |

|       |          |          |               |                 |       |      |      |      |        |    |
|-------|----------|----------|---------------|-----------------|-------|------|------|------|--------|----|
| chr16 | 23521573 | 23521899 | GGA2          | ENSG00000103365 | 79    | 0.25 | 0.37 | 0.34 | -0.12  | NA |
| chr16 | 67571252 | 67572728 | FAM65A        | ENSG00000039523 | 556   | 0.26 | 0.22 | 0.34 | 0.036  | NA |
| chr16 | 75018396 | 75019245 | WDR59         | ENSG00000103091 | -96   | 0.26 | 0.17 | 0.34 | 0.097  | NA |
| chr16 | 87636506 | 87637284 | JPH3          | ENSG00000154118 | 384   | 0.22 | 0.26 | 0.34 | -0.044 | NA |
| chr16 | 48643589 | 48643860 | N4BP1         | ENSG00000102921 | 396   | 0.22 | 0.28 | 0.35 | -0.062 | NA |
| chr16 | 56703387 | 56703648 | MT1H          | ENSG00000205358 | -209  | 0.58 | 0.45 | 0.35 | 0.13   | NA |
| chr16 | 18995156 | 18995577 | TMC7          | ENSG00000170537 | 92    | 0.24 | 0.15 | 0.36 | 0.092  | NA |
| chr16 | 19421816 | 19422498 | TMC5          | ENSG00000103534 | 296   | 0.17 | 0.21 | 0.36 | -0.041 | NA |
| chr16 | 23607250 | 23607846 | NDUFAB1       | ENSG00000004779 | 76    | 0.19 | 0.16 | 0.36 | 0.038  | NA |
| chr16 | 74734152 | 74734572 | MLKL          | ENSG00000168404 | 427   | 0.33 | 0.17 | 0.36 | 0.16   | NA |
| chr16 | 188614   | 188904   | NPRL3         | ENSG00000103148 | -94   | 0.16 | 0.29 | 0.37 | -0.13  | NA |
| chr16 | 50058867 | 50059423 | TMEM188       | ENSG00000205423 | -7    | 0.25 | 0.19 | 0.37 | 0.059  | NA |
| chr16 | 77756416 | 77756681 | NUDT7         | ENSG00000140876 | 68    | 0.18 | 0.24 | 0.37 | -0.06  | NA |
| chr16 | 3192181  | 3192669  | AC108134.2    | ENSG00000228146 | -1819 | 0.97 | 0.94 | 0.38 | 0.032  | NA |
| chr16 | 18801251 | 18801866 | RPS15A        | ENSG00000134419 | 98    | 0.28 | 0.23 | 0.38 | 0.045  | NA |
| chr16 | 22217299 | 22218090 | EEF2K         | ENSG00000103319 | 78    | 0.21 | 0.17 | 0.38 | 0.037  | NA |
| chr16 | 31711839 | 31712343 | KIAA0664L3    | ENSG00000131797 | 180   | 0.22 | 0.18 | 0.38 | 0.038  | NA |
| chr16 | 58162754 | 58163682 | C16orf80      | ENSG00000070761 | 107   | 0.33 | 0.41 | 0.38 | -0.081 | NA |
| chr16 | 110995   | 113162   | RHBDF1        | ENSG00000007384 | 126   | 0.88 | 0.9  | 0.39 | -0.018 | NA |
| chr16 | 2155867  | 2156884  | PKD1          | ENSG00000008710 | 1382  | 0.52 | 0.37 | 0.39 | 0.15   | NA |
| chr16 | 3546366  | 3546769  | LA16c-306E5.1 | ENSG00000240311 | 366   | 0.98 | 0.95 | 0.39 | 0.029  | NA |
| chr16 | 19179002 | 19180217 | SYT17         | ENSG00000103528 | 38    | 0.23 | 0.2  | 0.39 | 0.031  | NA |
| chr16 | 22385077 | 22386485 | CDR2          | ENSG00000140743 | 157   | 0.18 | 0.21 | 0.39 | -0.03  | NA |
| chr16 | 30366206 | 30366761 | CD2BP2        | ENSG00000169217 | 199   | 0.31 | 0.25 | 0.39 | 0.061  | NA |
| chr16 | 74401546 | 74402639 | AC009053.1    | ENSG00000214331 | 46    | 0.18 | 0.21 | 0.39 | -0.027 | NA |
| chr16 | 85932121 | 85932942 | IRF8          | ENSG00000140968 | 122   | 0.21 | 0.25 | 0.39 | -0.039 | NA |
| chr16 | 15950839 | 15951266 | MYH11         | ENSG00000133392 | -165  | 0.22 | 0.29 | 0.4  | -0.075 | NA |
| chr16 | 69345137 | 69345905 | VPS4A         | ENSG00000132612 | 234   | 0.27 | 0.22 | 0.4  | 0.052  | NA |
| chr16 | 88871850 | 88872056 | CDT1          | ENSG00000167513 | 1767  | 0.5  | 0.7  | 0.4  | -0.2   | NA |
| chr16 | 2040034  | 2040628  | SYNGR3        | ENSG00000127561 | 331   | 0.21 | 0.3  | 0.41 | -0.095 | NA |



|       |          |          |            |                 |      |      |      |      |        |    |
|-------|----------|----------|------------|-----------------|------|------|------|------|--------|----|
| chr16 | 2581726  | 2582648  | CEMP1      | ENSG00000205923 | -767 | 0.28 | 0.35 | 0.41 | -0.067 | NA |
| chr16 | 2907574  | 2907836  | PRSS22     | ENSG00000005001 | 466  | 0.21 | 0.4  | 0.41 | -0.19  | NA |
| chr16 | 3661120  | 3661775  | SLX4       | ENSG00000188827 | 139  | 0.25 | 0.3  | 0.41 | -0.054 | NA |
| chr16 | 3929483  | 3929769  | CREBBP     | ENSG00000005339 | 495  | 0.62 | 0.41 | 0.41 | 0.21   | NA |
| chr16 | 31885042 | 31885600 | ZNF267     | ENSG00000185947 | 242  | 0.14 | 0.18 | 0.41 | -0.038 | NA |
| chr16 | 89283762 | 89284616 | ZNF778     | ENSG00000170100 | 78   | 0.25 | 0.21 | 0.41 | 0.04   | NA |
| chr16 | 2932267  | 2933765  | FLYWCH2    | ENSG00000162076 | -171 | 0.2  | 0.18 | 0.42 | 0.027  | NA |
| chr16 | 66878172 | 66879072 | CA7        | ENSG00000168748 | 340  | 0.2  | 0.18 | 0.42 | 0.026  | NA |
| chr16 | 67875717 | 67876740 | THAP11     | ENSG00000168286 | 15   | 0.27 | 0.23 | 0.42 | 0.034  | NA |
| chr16 | 75589560 | 75590359 | TMEM231    | ENSG00000205084 | 177  | 0.46 | 0.4  | 0.42 | 0.058  | NA |
| chr16 | 1420170  | 1420442  | UNKL       | ENSG00000059145 | -299 | 0.9  | 0.86 | 0.43 | 0.048  | NA |
| chr16 | 2205207  | 2205902  | TRAF7      | ENSG00000131653 | -212 | 0.36 | 0.31 | 0.43 | 0.057  | NA |
| chr16 | 10837584 | 10838196 | NUBP1      | ENSG00000103274 | 212  | 0.31 | 0.39 | 0.43 | -0.086 | NA |
| chr16 | 25026067 | 25026538 | ARHGAP17   | ENSG00000140750 | 373  | 0.24 | 0.2  | 0.43 | 0.04   | NA |
| chr16 | 28303973 | 28304770 | SBK1       | ENSG00000188322 | 531  | 0.33 | 0.27 | 0.43 | 0.062  | NA |
| chr16 | 78133174 | 78134066 | WVOX       | ENSG00000186153 | 69   | 0.24 | 0.18 | 0.43 | 0.053  | NA |
| chr16 | 84853348 | 84853714 | CRISPLD2   | ENSG00000103196 | -6   | 0.24 | 0.19 | 0.43 | 0.05   | NA |
| chr16 | 88716989 | 88717606 | CYBA       | ENSG00000051523 | 160  | 0.46 | 0.52 | 0.43 | -0.064 | NA |
| chr16 | 89573954 | 89575368 | SPG7       | ENSG00000197912 | -150 | 0.21 | 0.18 | 0.43 | 0.029  | NA |
| chr16 | 4526295  | 4526927  | HMOX2      | ENSG00000103415 | 270  | 0.19 | 0.15 | 0.44 | 0.036  | NA |
| chr16 | 8962189  | 8963190  | CARHSP1    | ENSG00000153048 | -431 | 0.18 | 0.15 | 0.44 | 0.032  | NA |
| chr16 | 11439186 | 11439767 | C16orf75   | ENSG00000175643 | 188  | 0.19 | 0.24 | 0.44 | -0.048 | NA |
| chr16 | 30596487 | 30596900 | ZNF785     | ENSG00000197162 | 352  | 0.21 | 0.16 | 0.44 | 0.052  | NA |
| chr16 | 69166352 | 69166908 | CIRH1A     | ENSG00000141076 | 212  | 0.37 | 0.24 | 0.44 | 0.13   | NA |
| chr16 | 89006334 | 89008600 | AC092384.1 | ENSG00000205018 | 918  | 0.23 | 0.21 | 0.44 | 0.025  | NA |
| chr16 | 122017   | 122873   | RHBDF1     | ENSG00000007384 | 121  | 0.23 | 0.18 | 0.45 | 0.05   | NA |
| chr16 | 1470502  | 1471164  | C16orf91   | ENSG00000174109 | -88  | 0.24 | 0.18 | 0.45 | 0.052  | NA |
| chr16 | 31519381 | 31519940 | C16orf58   | ENSG00000140688 | 45   | 0.26 | 0.22 | 0.45 | 0.038  | NA |
| chr16 | 74808313 | 74808986 | FA2H       | ENSG00000103089 | 80   | 0.26 | 0.21 | 0.45 | 0.047  | NA |
| chr16 | 90085109 | 90086419 | DBNDD1     | ENSG00000003249 | 117  | 0.32 | 0.28 | 0.45 | 0.037  | NA |

|       |          |          |                |                 |       |      |      |      |        |    |
|-------|----------|----------|----------------|-----------------|-------|------|------|------|--------|----|
| chr16 | 3029752  | 3030954  | PKMYT1         | ENSG00000127564 | 64    | 0.2  | 0.24 | 0.46 | -0.034 | NA |
| chr16 | 30428870 | 30429799 | SNORA42        | ENSG00000199787 | 1746  | 0.22 | 0.2  | 0.46 | 0.028  | NA |
| chr16 | 31075084 | 31075756 | ZNF668         | ENSG00000167394 | 870   | 0.98 | 0.94 | 0.46 | 0.034  | NA |
| chr16 | 48278058 | 48278655 | LONP2          | ENSG00000102910 | 149   | 0.3  | 0.25 | 0.46 | 0.053  | NA |
| chr16 | 712234   | 712440   | WDR90          | ENSG00000161996 | 62    | 0.91 | 0.97 | 0.47 | -0.063 | NA |
| chr16 | 1676042  | 1676297  | LA16c-395F10.1 | ENSG00000226890 | -8    | 0.94 | 0.98 | 0.47 | -0.045 | NA |
| chr16 | 2245866  | 2247100  | CASKIN1        | ENSG00000167971 | -18   | 0.25 | 0.23 | 0.47 | 0.025  | NA |
| chr16 | 3067521  | 3068358  | CLDN6          | ENSG00000184697 | 249   | 0.4  | 0.36 | 0.47 | 0.046  | NA |
| chr16 | 29818681 | 29819554 | MAZ            | ENSG00000103495 | 422   | 0.23 | 0.19 | 0.47 | 0.044  | NA |
| chr16 | 62069121 | 62070634 | CDH8           | ENSG00000150394 | 862   | 0.24 | 0.19 | 0.47 | 0.041  | NA |
| chr16 | 71917738 | 71918542 | ZNF821         | ENSG00000102984 | -90   | 0.38 | 0.33 | 0.47 | 0.048  | NA |
| chr16 | 18582324 | 18582652 | AC136618.1     | ENSG00000256340 | -22   | 1    | 0.12 | 0.48 | 0.88   | NA |
| chr16 | 47494697 | 47495207 | ITFG1          | ENSG00000129636 | 183   | 0.31 | 0.24 | 0.48 | 0.067  | NA |
| chr16 | 334444   | 334764   | PDIA2          | ENSG00000185615 | -271  | 0.9  | 0.96 | 0.49 | -0.053 | NA |
| chr16 | 22824616 | 22826459 | HS3ST2         | ENSG00000122254 | 39    | 0.25 | 0.24 | 0.49 | 0.018  | NA |
| chr16 | 25122810 | 25123442 | LCMT1          | ENSG00000205629 | 79    | 0.28 | 0.32 | 0.5  | -0.048 | NA |
| chr16 | 3332472  | 3333847  | ZNF263         | ENSG00000006194 | -289  | 0.22 | 0.25 | 0.51 | -0.031 | NA |
| chr16 | 3724344  | 3724849  | AC006111.1     | ENSG00000178430 | -815  | 0.75 | 0.94 | 0.51 | -0.19  | NA |
| chr16 | 4475429  | 4476330  | DNAJA3         | ENSG00000103423 | 73    | 0.15 | 0.18 | 0.51 | -0.029 | NA |
| chr16 | 12070257 | 12070870 | RP11-166B2.1   | ENSG00000234719 | -72   | 0.3  | 0.26 | 0.51 | 0.041  | NA |
| chr16 | 58058712 | 58058928 | MMP15          | ENSG00000102996 | -650  | 0.3  | 0.24 | 0.51 | 0.062  | NA |
| chr16 | 70099274 | 70100227 | RP11-106J23.2  | ENSG00000255185 | -71   | 0.22 | 0.17 | 0.51 | 0.044  | NA |
| chr16 | 81040134 | 81041325 | CENPN          | ENSG00000166451 | 572   | 0.36 | 0.29 | 0.51 | 0.068  | NA |
| chr16 | 88850204 | 88850537 | FAM38A         | ENSG00000103335 | 1002  | 0.29 | 0.37 | 0.51 | -0.087 | NA |
| chr16 | 90066317 | 90066643 | AFG3L1P        | ENSG00000223959 | 1466  | 0.92 | 0.95 | 0.51 | -0.028 | NA |
| chr16 | 15489526 | 15490075 | MPV17L         | ENSG00000156968 | 189   | 0.22 | 0.2  | 0.52 | 0.023  | NA |
| chr16 | 67969290 | 67970418 | PSMB10         | ENSG00000205220 | 1136  | 0.28 | 0.25 | 0.52 | 0.029  | NA |
| chr16 | 30032784 | 30033131 | C16orf92       | ENSG00000167194 | -1698 | 0.42 | 0.33 | 0.53 | 0.089  | NA |
| chr16 | 56458735 | 56459748 | AMFR           | ENSG00000159461 | 207   | 0.23 | 0.2  | 0.54 | 0.037  | NA |
| chr16 | 27324885 | 27325695 | IL4R           | ENSG00000077238 | 43    | 0.27 | 0.23 | 0.56 | 0.036  | NA |

|       |          |          |            |                 |       |      |      |      |        |    |
|-------|----------|----------|------------|-----------------|-------|------|------|------|--------|----|
| chr16 | 30991828 | 30992129 | SETD1A     | ENSG00000099381 | 604   | 0.89 | 0.94 | 0.56 | -0.045 | NA |
| chr16 | 55866647 | 55866998 | CES1       | ENSG00000198848 | 152   | 0.95 | 0.91 | 0.56 | 0.034  | NA |
| chr16 | 69419316 | 69420086 | TERF2      | ENSG00000132604 | 158   | 0.3  | 0.25 | 0.56 | 0.044  | NA |
| chr16 | 84401957 | 84402497 | ATP2C2     | ENSG00000064270 | 94    | 0.22 | 0.19 | 0.56 | 0.031  | NA |
| chr16 | 85044730 | 85045436 | ZDHHC7     | ENSG00000153786 | 58    | 0.18 | 0.16 | 0.56 | 0.026  | NA |
| chr16 | 841347   | 841551   | CHTF18     | ENSG00000127586 | -1075 | 1    | 0.93 | 0.57 | 0.072  | NA |
| chr16 | 2563430  | 2564903  | ATP6V0C    | ENSG00000185883 | 295   | 0.29 | 0.27 | 0.57 | 0.026  | NA |
| chr16 | 4303444  | 4304225  | AC009171.1 | ENSG00000245388 | -44   | 0.22 | 0.2  | 0.57 | 0.022  | NA |
| chr16 | 67449936 | 67450472 | ZDHHC1     | ENSG00000159714 | 173   | 0.25 | 0.22 | 0.57 | 0.034  | NA |
| chr16 | 83841412 | 83841988 | HSBP1      | ENSG00000230989 | 107   | 0.26 | 0.23 | 0.57 | 0.03   | NA |
| chr16 | 68298012 | 68298979 | SLC7A6     | ENSG00000103064 | 72    | 0.17 | 0.15 | 0.58 | 0.015  | NA |
| chr16 | 88636176 | 88637333 | C16orf85   | ENSG00000205036 | -206  | 0.19 | 0.16 | 0.58 | 0.034  | NA |
| chr16 | 4816764  | 4817353  | ZNF500     | ENSG00000103199 | 108   | 0.26 | 0.22 | 0.59 | 0.034  | NA |
| chr16 | 66969499 | 66969878 | CES2       | ENSG00000172831 | 1325  | 0.25 | 0.31 | 0.59 | -0.056 | NA |
| chr16 | 2018519  | 2018791  | RNF151     | ENSG00000179580 | 1380  | 0.91 | 0.88 | 0.6  | 0.034  | NA |
| chr16 | 66600024 | 66600619 | CMTM1      | ENSG00000089505 | 27    | 0.93 | 0.91 | 0.6  | 0.021  | NA |
| chr16 | 70147666 | 70148759 | PDPR       | ENSG00000090857 | -63   | 0.22 | 0.26 | 0.6  | -0.032 | NA |
| chr16 | 84650960 | 84651565 | COTL1      | ENSG00000103187 | 421   | 0.22 | 0.19 | 0.6  | 0.026  | NA |
| chr16 | 87984401 | 87985733 | BANP       | ENSG00000172530 | 29    | 0.36 | 0.32 | 0.6  | 0.042  | NA |
| chr16 | 88850744 | 88852274 | FAM38A     | ENSG00000103335 | -137  | 0.26 | 0.23 | 0.6  | 0.024  | NA |
| chr16 | 89167763 | 89167991 | ACSF3      | ENSG00000176715 | 799   | 0.91 | 0.95 | 0.6  | -0.044 | NA |
| chr16 | 67193005 | 67193219 | TRADD      | ENSG00000102871 | 677   | 0.22 | 0.4  | 0.61 | -0.18  | NA |
| chr16 | 71495773 | 71496260 | ZNF23      | ENSG00000167377 | 101   | 0.2  | 0.25 | 0.61 | -0.055 | NA |
| chr16 | 1543098  | 1544426  | TELO2      | ENSG00000100726 | 398   | 0.26 | 0.23 | 0.62 | 0.029  | NA |
| chr16 | 2125659  | 2125995  | TSC2       | ENSG00000103197 | -321  | 0.91 | 0.95 | 0.62 | -0.045 | NA |
| chr16 | 23724270 | 23724775 | ERN2       | ENSG00000134398 | 25    | 0.33 | 0.3  | 0.62 | 0.033  | NA |
| chr16 | 33777505 | 33779139 | AC133561.2 | ENSG00000205452 | -578  | 1    | 0.9  | 0.63 | 0.1    | NA |
| chr16 | 90143683 | 90144081 | PRDM7      | ENSG00000126856 | -1544 | 0.39 | 0.3  | 0.63 | 0.085  | NA |
| chr16 | 22308591 | 22309365 | POLR3E     | ENSG00000058600 | 248   | 0.26 | 0.29 | 0.64 | -0.033 | NA |
| chr16 | 89985913 | 89986356 | AC092143.2 | ENSG00000256390 | 861   | 0.86 | 0.9  | 0.65 | -0.039 | NA |

|       |          |          |            |                 |       |      |      |      |        |    |
|-------|----------|----------|------------|-----------------|-------|------|------|------|--------|----|
| chr16 | 74640468 | 74641197 | GLG1       | ENSG00000090863 | 210   | 0.27 | 0.25 | 0.66 | 0.021  | NA |
| chr16 | 90015551 | 90016120 | DEF8       | ENSG00000140995 | 652   | 0.41 | 0.35 | 0.66 | 0.06   | NA |
| chr16 | 4364966  | 4365716  | GLIS2      | ENSG00000126603 | 579   | 0.29 | 0.22 | 0.67 | 0.069  | NA |
| chr16 | 53468284 | 53469209 | RBL2       | ENSG00000103479 | 385   | 0.26 | 0.3  | 0.67 | -0.036 | NA |
| chr16 | 1660054  | 1665095  | IFT140     | ENSG00000187535 | -1880 | 0.25 | 0.24 | 0.68 | 0.0079 | NA |
| chr16 | 2263912  | 2265428  | PGP        | ENSG00000184207 | 152   | 0.19 | 0.2  | 0.68 | -0.012 | NA |
| chr16 | 31128799 | 31129200 | MYST1      | ENSG00000103510 | 16    | 0.37 | 0.28 | 0.68 | 0.091  | NA |
| chr16 | 84328519 | 84328720 | WFDC1      | ENSG00000103175 | 367   | 0.42 | 0.58 | 0.68 | -0.17  | NA |
| chr16 | 90014250 | 90014613 | DEF8       | ENSG00000140995 | -720  | 0.4  | 0.2  | 0.68 | 0.2    | NA |
| chr16 | 67217716 | 67219219 | KIAA0895L  | ENSG00000196123 | -584  | 0.31 | 0.28 | 0.69 | 0.031  | NA |
| chr16 | 71264360 | 71264659 | HYDIN      | ENSG00000157423 | 49    | 0.17 | 0.11 | 0.69 | 0.064  | NA |
| chr16 | 841900   | 842539   | CHTF18     | ENSG00000127586 | -305  | 0.94 | 0.93 | 0.7  | 0.013  | NA |
| chr16 | 2185139  | 2186406  | PKD1       | ENSG00000008710 | 127   | 0.21 | 0.17 | 0.7  | 0.043  | NA |
| chr16 | 69373061 | 69373882 | NIP7       | ENSG00000132603 | 128   | 0.31 | 0.28 | 0.7  | 0.026  | NA |
| chr16 | 3184276  | 3185312  | ZNF213     | ENSG00000085644 | -263  | 0.19 | 0.21 | 0.71 | -0.019 | NA |
| chr16 | 9056372  | 9056844  | USP7       | ENSG00000187555 | 733   | 0.31 | 0.28 | 0.71 | 0.025  | NA |
| chr16 | 11945065 | 11945517 | RSL1D1     | ENSG00000171490 | 110   | 0.45 | 0.49 | 0.71 | -0.046 | NA |
| chr16 | 25268786 | 25269728 | ZKSCAN2    | ENSG00000155592 | -402  | 0.22 | 0.2  | 0.72 | 0.02   | NA |
| chr16 | 2114025  | 2114244  | TSC2       | ENSG00000103197 | -1280 | 0.95 | 0.88 | 0.73 | 0.068  | NA |
| chr16 | 3220438  | 3221356  | AJ003147.1 | ENSG00000243941 | 134   | 0.2  | 0.21 | 0.73 | -0.014 | NA |
| chr16 | 15224916 | 15225536 | AC139256.2 | ENSG00000250251 | 130   | 0.92 | 0.83 | 0.73 | 0.083  | NA |
| chr16 | 57835955 | 57836989 | KIFC3      | ENSG00000140859 | -37   | 0.22 | 0.2  | 0.73 | 0.021  | NA |
| chr16 | 70719114 | 70720441 | MTSS1L     | ENSG00000132613 | -83   | 0.28 | 0.31 | 0.73 | -0.029 | NA |
| chr16 | 84224731 | 84225085 | ADAD2      | ENSG00000140955 | 164   | 0.89 | 1    | 0.73 | -0.11  | NA |
| chr16 | 426038   | 426290   | TMEM8A     | ENSG00000129925 | 311   | 0.97 | 0.91 | 0.74 | 0.06   | NA |
| chr16 | 474922   | 476815   | RAB11FIP3  | ENSG00000090565 | 249   | 0.21 | 0.22 | 0.74 | -0.011 | NA |
| chr16 | 32264531 | 32265444 | AC133485.1 | ENSG00000205456 | 344   | 0.8  | 1    | 0.75 | -0.2   | NA |
| chr16 | 55542920 | 55543274 | LPCAT2     | ENSG00000087253 | 187   | 0.29 | 0.25 | 0.76 | 0.046  | NA |
| chr16 | 89752878 | 89753684 | CDK10      | ENSG00000185324 | 205   | 0.23 | 0.22 | 0.76 | 0.019  | NA |
| chr16 | 1115827  | 1116468  | AC009041.1 | ENSG00000181791 | 202   | 0.52 | 0.55 | 0.77 | -0.028 | NA |

|       |          |          |               |                 |       |      |      |      |         |    |
|-------|----------|----------|---------------|-----------------|-------|------|------|------|---------|----|
| chr16 | 69788469 | 69788984 | NOB1          | ENSG00000141101 | 103   | 0.27 | 0.22 | 0.77 | 0.05    | NA |
| chr16 | 31084343 | 31086048 | ZNF668        | ENSG00000167394 | -621  | 0.21 | 0.19 | 0.78 | 0.011   | NA |
| chr16 | 89119306 | 89119664 | AC135782.1    | ENSG00000256982 | -112  | 0.32 | 0.26 | 0.78 | 0.059   | NA |
| chr16 | 19566486 | 19567388 | C16orf62      | ENSG00000103544 | 375   | 0.5  | 0.15 | 0.79 | 0.35    | NA |
| chr16 | 19535074 | 19535635 | AC012621.2    | ENSG00000103540 | 146   | 0.3  | 0.27 | 0.8  | 0.031   | NA |
| chr16 | 30346052 | 30346865 | RP11-347C12.2 | ENSG00000183604 | -83   | 0.25 | 0.23 | 0.8  | 0.017   | NA |
| chr16 | 71879763 | 71880296 | ATXN1L        | ENSG00000224470 | 130   | 0.39 | 0.42 | 0.8  | -0.034  | NA |
| chr16 | 58231265 | 58231610 | CSNK2A2       | ENSG00000070770 | 345   | 0.26 | 0.31 | 0.81 | -0.049  | NA |
| chr16 | 67034470 | 67035340 | CES4A         | ENSG00000172824 | 428   | 0.2  | 0.18 | 0.81 | 0.021   | NA |
| chr16 | 76268977 | 76269193 | RP11-150D5.1  | ENSG00000244485 | 436   | 0.93 | 0.96 | 0.81 | -0.025  | NA |
| chr16 | 86320175 | 86321055 | AC040170.1    | ENSG00000248463 | 582   | 0.15 | 0.17 | 0.81 | -0.023  | NA |
| chr16 | 127448   | 128631   | MPG           | ENSG00000103152 | -23   | 0.21 | 0.2  | 0.82 | 0.0085  | NA |
| chr16 | 67260744 | 67261155 | LRRC29        | ENSG00000125122 | -169  | 0.25 | 0.22 | 0.82 | 0.033   | NA |
| chr16 | 67464388 | 67465462 | HSD11B2       | ENSG00000176387 | -116  | 0.25 | 0.24 | 0.82 | 0.012   | NA |
| chr16 | 67062613 | 67064012 | CBFB          | ENSG00000067955 | 262   | 0.22 | 0.23 | 0.83 | -0.0081 | NA |
| chr16 | 2317445  | 2319000  | RNPS1         | ENSG00000205937 | -425  | 0.25 | 0.26 | 0.84 | -0.0094 | NA |
| chr16 | 30194747 | 30195357 | CORO1A        | ENSG00000102879 | 160   | 0.18 | 0.16 | 0.84 | 0.012   | NA |
| chr16 | 31105451 | 31106321 | VKORC1        | ENSG00000167397 | -16   | 0.21 | 0.2  | 0.84 | 0.012   | NA |
| chr16 | 56715992 | 56716425 | MT1X          | ENSG00000187193 | -128  | 0.17 | 0.15 | 0.84 | 0.018   | NA |
| chr16 | 75600006 | 75600860 | GABARAPL2     | ENSG00000034713 | 184   | 0.27 | 0.29 | 0.84 | -0.02   | NA |
| chr16 | 712735   | 713047   | WDR90         | ENSG00000161996 | -249  | 0.99 | 0.97 | 0.86 | 0.026   | NA |
| chr16 | 14726516 | 14727366 | BFAR          | ENSG00000103429 | 269   | 0.28 | 0.3  | 0.86 | -0.015  | NA |
| chr16 | 30959242 | 30959533 | ORAI3         | ENSG00000175938 | -1000 | 0.22 | 0.3  | 0.86 | -0.078  | NA |
| chr16 | 31044353 | 31045495 | STX4          | ENSG00000103496 | 508   | 0.21 | 0.21 | 0.86 | -0.0074 | NA |
| chr16 | 71659829 | 71660747 | MARVELD3      | ENSG00000140832 | 199   | 0.23 | 0.24 | 0.86 | -0.012  | NA |
| chr16 | 88134540 | 88134849 | AC134312.1    | ENSG00000205037 | -129  | 0.22 | 0.19 | 0.86 | 0.029   | NA |
| chr16 | 30569181 | 30570049 | ZNF764        | ENSG00000169951 | -31   | 0.21 | 0.22 | 0.87 | -0.011  | NA |
| chr16 | 30797744 | 30798777 | ZNF629        | ENSG00000102870 | 263   | 0.28 | 0.26 | 0.87 | 0.015   | NA |
| chr16 | 67918679 | 67918909 | NRN1L         | ENSG00000188038 | 13    | 0.21 | 0.22 | 0.87 | -0.016  | NA |
| chr16 | 66638254 | 66639561 | CMTM3         | ENSG00000140931 | 694   | 0.25 | 0.24 | 0.88 | 0.0069  | NA |

|       |          |          |            |                 |      |      |      |      |         |    |
|-------|----------|----------|------------|-----------------|------|------|------|------|---------|----|
| chr16 | 3073686  | 3074443  | THOC6      | ENSG00000131652 | 32   | 0.36 | 0.28 | 0.89 | 0.077   | NA |
| chr16 | 1122629  | 1123009  | SSTR5      | ENSG00000162009 | 63   | 0.21 | 0.24 | 0.9  | -0.032  | NA |
| chr16 | 1487017  | 1487260  | CCDC154    | ENSG00000197599 | 766  | 0.94 | 0.95 | 0.9  | -0.018  | NA |
| chr16 | 88793071 | 88793877 | FAM38A     | ENSG00000103335 | -722 | 0.94 | 0.89 | 0.9  | 0.043   | NA |
| chr16 | 447160   | 447649   | NME4       | ENSG00000103202 | 205  | 0.18 | 0.19 | 0.91 | -0.015  | NA |
| chr16 | 56224731 | 56224980 | AC007495.1 | ENSG00000246379 | 151  | 0.24 | 0.22 | 0.91 | 0.02    | NA |
| chr16 | 66914167 | 66914782 | PDP2       | ENSG00000172840 | 38   | 0.2  | 0.22 | 0.91 | -0.017  | NA |
| chr16 | 70834689 | 70835298 | VAC14      | ENSG00000103043 | 78   | 0.26 | 0.24 | 0.91 | 0.017   | NA |
| chr16 | 3507545  | 3508606  | NAT15      | ENSG00000122390 | 83   | 0.24 | 0.25 | 0.92 | -0.014  | NA |
| chr16 | 15247870 | 15249155 | AC139256.2 | ENSG00000250251 | -91  | 0.25 | 0.27 | 0.92 | -0.024  | NA |
| chr16 | 21312168 | 21313333 | NCRNA00169 | ENSG00000189149 | 580  | 0.27 | 0.29 | 0.92 | -0.022  | NA |
| chr16 | 67867658 | 67867898 | CENPT      | ENSG00000102901 | 10   | 0.17 | 0.15 | 0.92 | 0.024   | NA |
| chr16 | 87350634 | 87351570 | AC010531.1 | ENSG00000131152 | -80  | 0.27 | 0.3  | 0.92 | -0.023  | NA |
| chr16 | 4363935  | 4364151  | GLIS2      | ENSG00000126603 | -719 | 0.29 | 0.29 | 0.93 | -0.0084 | NA |
| chr16 | 89990069 | 89990507 | TUBB3      | ENSG00000198211 | 601  | 0.22 | 0.27 | 0.93 | -0.05   | NA |
| chr16 | 3013651  | 3015131  | KREMEN2    | ENSG00000131650 | 231  | 0.25 | 0.23 | 0.95 | 0.015   | NA |
| chr16 | 2014164  | 2015451  | RPS2       | ENSG00000140988 | -450 | 0.27 | 0.28 | 0.95 | -0.0057 | NA |
| chr16 | 68056582 | 68057353 | DUS2L      | ENSG00000167264 | -216 | 0.19 | 0.2  | 0.96 | -0.011  | NA |
| chr16 | 82203648 | 82204231 | MPHOSPH6   | ENSG00000135698 | -108 | 0.22 | 0.18 | 0.96 | 0.046   | NA |
| chr16 | 332514   | 332760   | PDIA2      | ENSG00000185615 | -515 | 0.9  | 0.85 | 0.97 | 0.05    | NA |
| chr16 | 16043218 | 16043927 | ABCC1      | ENSG00000103222 | 138  | 0.24 | 0.25 | 0.97 | -0.0084 | NA |
| chr16 | 2077042  | 2077470  | SLC9A3R2   | ENSG00000065054 | 368  | 0.19 | 0.18 | 0.98 | 0.011   | NA |
| chr16 | 11890324 | 11891521 | ZC3H7A     | ENSG00000122299 | 177  | 0.23 | 0.22 | 0.98 | 0.0053  | NA |
| chr16 | 15528350 | 15529086 | C16orf45   | ENSG00000166780 | 393  | 0.21 | 0.22 | 0.98 | -0.011  | NA |
| chr16 | 25702955 | 25704631 | HS3ST4     | ENSG00000182601 | 446  | 0.21 | 0.2  | 0.98 | 0.0033  | NA |
| chr16 | 90160332 | 90161075 | AC133919.1 | ENSG00000239076 | 1124 | 0.92 | 0.91 | 0.98 | 0.015   | NA |
| chr16 | 2105014  | 2105390  | TSC2       | ENSG00000103197 | -960 | 0.81 | 0.79 | 0.99 | 0.02    | NA |
| chr16 | 2112868  | 2113171  | TSC2       | ENSG00000103197 | 180  | 0.85 | 0.81 | 0.99 | 0.042   | NA |
| chr16 | 3493098  | 3493569  | ZNF597     | ENSG00000167981 | 204  | 0.63 | 0.61 | 0.99 | 0.015   | NA |
| chr16 | 335829   | 336034   | PDIA2      | ENSG00000185615 | 251  | 0.96 | 1    | 1    | -0.037  | NA |

|       |          |          |               |                 |       |      |      |   |         |    |
|-------|----------|----------|---------------|-----------------|-------|------|------|---|---------|----|
| chr16 | 450834   | 451140   | DECR2         | ENSG00000242612 | -839  | 0.54 | 0.53 | 1 | 0.0066  | NA |
| chr16 | 629463   | 629903   | PIGQ          | ENSG00000007541 | 592   | 1    | 1    | 1 | 0       | NA |
| chr16 | 1382916  | 1384735  | BAIAP3        | ENSG00000007516 | 179   | 0.23 | 0.23 | 1 | #####   | NA |
| chr16 | 1449295  | 1449545  | UNKL          | ENSG00000059145 | 89    | 0.95 | 0.95 | 1 | -0.0048 | NA |
| chr16 | 1480844  | 1481045  | C16orf91      | ENSG00000174109 | -1599 | 0.28 | 0.29 | 1 | -0.013  | NA |
| chr16 | 1495039  | 1495366  | CCDC154       | ENSG00000197599 | -645  | 1    | 0.97 | 1 | 0.032   | NA |
| chr16 | 1514412  | 1514859  | CLCN7         | ENSG00000103249 | 704   | 0.94 | 0.94 | 1 | -0.0018 | NA |
| chr16 | 2286600  | 2288073  | DNASE1L2      | ENSG00000167968 | 610   | 0.59 | 0.59 | 1 | -0.0028 | NA |
| chr16 | 2732272  | 2732940  | KCTD5         | ENSG00000167977 | 108   | 0.19 | 0.19 | 1 | 0.0032  | NA |
| chr16 | 3355020  | 3356012  | ZNF75A        | ENSG00000162086 | 30    | 0.2  | 0.19 | 1 | 0.0053  | NA |
| chr16 | 4166655  | 4167012  | ADCY9         | ENSG00000162104 | -647  | 0.19 | 0.21 | 1 | -0.021  | NA |
| chr16 | 4421642  | 4422240  | VASN          | ENSG00000168140 | 92    | 0.25 | 0.26 | 1 | -0.0032 | NA |
| chr16 | 5121749  | 5122192  | ALG1          | ENSG00000033011 | 150   | 0.22 | 0.2  | 1 | 0.022   | NA |
| chr16 | 8715416  | 8715724  | METTL22       | ENSG00000067365 | 25    | 0.17 | 0.5  | 1 | -0.33   | NA |
| chr16 | 14918471 | 14918799 | ABCC6P2       | ENSG00000255277 | -109  | 0.75 | 1    | 1 | -0.25   | NA |
| chr16 | 15012708 | 15013276 | RP11-958N24.1 | ENSG00000183458 | 177   | 1    | 1    | 1 | 0       | NA |
| chr16 | 15227122 | 15228137 | AC139256.2    | ENSG00000250251 | 73    | 0.87 | 1    | 1 | -0.13   | NA |
| chr16 | 19127121 | 19127324 | ITPRIPL2      | ENSG00000205730 | 1968  | 0.9  | 0.9  | 1 | -0.0051 | NA |
| chr16 | 19532981 | 19533516 | GDE1          | ENSG00000006007 | 202   | 0.28 | 0.29 | 1 | -0.012  | NA |
| chr16 | 21169810 | 21170278 | TMEM159       | ENSG00000011638 | 132   | 0.43 | 0.41 | 1 | 0.018   | NA |
| chr16 | 23159966 | 23160966 | USP31         | ENSG00000103404 | 125   | 0.18 | 0.18 | 1 | -0.0016 | NA |
| chr16 | 23652387 | 23652918 | PALB2         | ENSG00000083093 | 26    | 0.29 | 0.29 | 1 | -0.0004 | NA |
| chr16 | 23689891 | 23690671 | PLK1          | ENSG00000166851 | 138   | 0.22 | 0.22 | 1 | 0.0012  | NA |
| chr16 | 28761529 | 28762146 | CTB-134H23.1  | ENSG00000196993 | -1271 | 0.19 | 0.22 | 1 | -0.031  | NA |
| chr16 | 28890954 | 28891868 | ATP2A1        | ENSG00000196296 | 37    | 0.15 | 0.15 | 1 | 0.0072  | NA |
| chr16 | 28961913 | 28962791 | NFATC2IP      | ENSG00000176953 | 37    | 0.24 | 0.23 | 1 | 0.0038  | NA |
| chr16 | 29465353 | 29467143 | RP11-231C14.3 | ENSG00000254634 | -813  | 0.54 | 0.5  | 1 | 0.038   | NA |
| chr16 | 29912896 | 29913203 | ASPHD1        | ENSG00000174939 | 791   | 0.25 | 0.24 | 1 | 0.0054  | NA |
| chr16 | 29973023 | 29973570 | TMEM219       | ENSG00000149932 | -55   | 0.16 | 0.16 | 1 | -0.0005 | NA |
| chr16 | 30042307 | 30042612 | FAM57B        | ENSG00000149926 | -265  | 0.25 | 0.15 | 1 | 0.096   | NA |

|       |          |          |            |                 |       |      |      |    |         |    |
|-------|----------|----------|------------|-----------------|-------|------|------|----|---------|----|
| chr16 | 30076310 | 30077872 | ALDOA      | ENSG00000149925 | 57    | 0.29 | 0.28 | 1  | 0.0065  | NA |
| chr16 | 30204695 | 30206485 | SLX1A      | ENSG00000132207 | 373   | 1    | 1    | 1  | 0       | NA |
| chr16 | 31117101 | 31117435 | BCKDK      | ENSG00000103507 | -160  | 0.5  | 0.35 | 1  | 0.15    | NA |
| chr16 | 32896188 | 32897822 | SLC6A10P   | ENSG00000214617 | -542  | 0.9  | 0.91 | 1  | -0.0043 | NA |
| chr16 | 49316997 | 49317263 | CBLN1      | ENSG00000102924 | -1388 | 0.26 | 0.27 | 1  | -0.0062 | NA |
| chr16 | 55794661 | 55794939 | CES1P1     | ENSG00000228695 | 340   | 0.38 | 0.4  | 1  | -0.017  | NA |
| chr16 | 56671937 | 56672530 | MT1A       | ENSG00000205362 | -345  | 0.23 | 0.22 | 1  | 0.0062  | NA |
| chr16 | 56691689 | 56692034 | MT1F       | ENSG00000198417 | 6     | 0.24 | 0.24 | 1  | -0.0028 | NA |
| chr16 | 56763993 | 56764482 | NUP93      | ENSG00000102900 | 200   | 0.36 | 0.33 | 1  | 0.024   | NA |
| chr16 | 57769596 | 57769973 | KATNB1     | ENSG00000140854 | 142   | 0.33 | 0.37 | 1  | -0.037  | NA |
| chr16 | 58033947 | 58035548 | C16orf57   | ENSG00000103005 | -558  | 0.26 | 0.26 | 1  | 0.0031  | NA |
| chr16 | 58283703 | 58284084 | CCDC113    | ENSG00000103021 | 53    | 0.31 | 0.25 | 1  | 0.055   | NA |
| chr16 | 58718309 | 58718703 | SLC38A7    | ENSG00000103042 | 168   | 0.25 | 0.21 | 1  | 0.041   | NA |
| chr16 | 66440502 | 66440958 | AC132186.1 | ENSG00000246898 | -1697 | 0.2  | 0.15 | 1  | 0.047   | NA |
| chr16 | 67880678 | 67881516 | NUTF2      | ENSG00000102898 | 462   | 0.23 | 0.23 | 1  | -0.0011 | NA |
| chr16 | 67906809 | 67907311 | EDC4       | ENSG00000038358 | 85    | 0.2  | 0.2  | 1  | 0.0029  | NA |
| chr16 | 68003407 | 68003759 | SLC12A4    | ENSG00000124067 | -986  | 0.84 | 0.82 | 1  | 0.019   | NA |
| chr16 | 68278870 | 68279628 | PLA2G15    | ENSG00000103066 | 42    | 0.22 | 0.21 | 1  | 0.0059  | NA |
| chr16 | 71392415 | 71392749 | CALB2      | ENSG00000172137 | -34   | 0.21 | 0.19 | 1  | 0.021   | NA |
| chr16 | 88052061 | 88052392 | BANP       | ENSG00000172530 | 1430  | 1    | 1    | 1  | 0       | NA |
| chr16 | 88105640 | 88105908 | BANP       | ENSG00000172530 | 1095  | 0.95 | 0.98 | 1  | -0.028  | NA |
| chr16 | 88729108 | 88730410 | MVD        | ENSG00000167508 | -241  | 0.25 | 0.25 | 1  | 0.0013  | NA |
| chr16 | 89118801 | 89119152 | AC135782.1 | ENSG00000256982 | 397   | 0.21 | 0.23 | 1  | -0.023  | NA |
| chr16 | 89661799 | 89662043 | CPNE7      | ENSG00000178773 | -63   | 1    | 0.97 | 1  | 0.032   | NA |
| chr16 | 90001271 | 90002256 | AC092143.1 | ENSG00000239174 | -341  | 0.93 | 0.93 | 1  | -0.0008 | NA |
| chr16 | 203753   | 204866   | HBM        | ENSG00000206177 | 418   | NA   | 0.16 | NA | NA      | NA |
| chr16 | 222369   | 223447   | HBA2       | ENSG00000188536 | 62    | 0.5  | NA   | NA | NA      | NA |
| chr16 | 561007   | 561212   | RAB11FIP3  | ENSG00000090565 | 546   | 1    | NA   | NA | NA      | NA |
| chr16 | 2284116  | 2284346  | DNASE1L2   | ENSG00000167968 | -1586 | 0.8  | NA   | NA | NA      | NA |
| chr16 | 2588034  | 2588556  | PDPK1      | ENSG00000140992 | 261   | 0.62 | NA   | NA | NA      | NA |



|       |          |          |                |                 |       |      |      |          |      |    |
|-------|----------|----------|----------------|-----------------|-------|------|------|----------|------|----|
| chr16 | 2614920  | 2615173  | PDPK1          | ENSG00000140992 | -546  | NA   | 1    | NA       | NA   | NA |
| chr16 | 3085222  | 3085469  | CCDC64B        | ENSG00000162069 | 197   | 0.39 | NA   | NA       | NA   | NA |
| chr16 | 15004806 | 15006100 | MIR3180-3      | ENSG00000258354 | -251  | NA   | 0.15 | NA       | NA   | NA |
| chr16 | 15015131 | 15015384 | RP11-958N24.1  | ENSG00000183458 | 1064  | 1    | NA   | NA       | NA   | NA |
| chr16 | 15019654 | 15020646 | RP11-958N24.1  | ENSG00000183458 | -83   | NA   | 1    | NA       | NA   | NA |
| chr16 | 15223723 | 15224262 | AC139256.2     | ENSG00000250251 | 1364  | 0.5  | NA   | NA       | NA   | NA |
| chr16 | 16424958 | 16425595 | AC138969.4     | ENSG00000183889 | -458  | 0.95 | NA   | NA       | NA   | NA |
| chr16 | 18444453 | 18444659 | RP11-1212A22.1 | ENSG00000205746 | 1777  | 1    | NA   | NA       | NA   | NA |
| chr16 | 18444748 | 18445066 | RP11-1212A22.1 | ENSG00000205746 | 1426  | 1    | NA   | NA       | NA   | NA |
| chr16 | 18470834 | 18471471 | RP11-1212A22.4 | ENSG00000233024 | -456  | 1    | NA   | NA       | NA   | NA |
| chr16 | 18573029 | 18573610 | NOMO2          | ENSG00000185164 | 77    | NA   | 0.22 | NA       | NA   | NA |
| chr16 | 30216738 | 30217851 | RP11-347C12.3  | ENSG00000258130 | 71    | NA   | 1    | NA       | NA   | NA |
| chr16 | 30905549 | 30905783 | BCL7C          | ENSG00000099385 | -43   | NA   | 0.33 | NA       | NA   | NA |
| chr16 | 32199219 | 32199676 | AC133485.1     | ENSG00000230267 | -13   | 1    | NA   | NA       | NA   | NA |
| chr16 | 54316903 | 54317149 | IRX3           | ENSG00000177508 | 1863  | 1    | NA   | NA       | NA   | NA |
| chr16 | 66460503 | 66460850 | BEAN1          | ENSG00000166546 | -140  | NA   | 0.29 | NA       | NA   | NA |
| chr16 | 66586268 | 66586719 | CKLF           | ENSG00000217555 | 27    | NA   | 1    | NA       | NA   | NA |
| chr16 | 67144023 | 67144335 | C16orf70       | ENSG00000125149 | 264   | NA   | 0.2  | NA       | NA   | NA |
| chr16 | 70323127 | 70323489 | AARS           | ENSG00000090861 | 104   | 0.33 | NA   | NA       | NA   | NA |
| chr16 | 81477777 | 81477999 | AC092135.1     | ENSG00000153815 | -887  | NA   | 0.33 | NA       | NA   | NA |
| chr16 | 85317749 | 85318003 | NCRNA00311     | ENSG00000179219 | 1312  | 0.29 | NA   | NA       | NA   | NA |
| chr16 | 89352528 | 89352825 | ANKRD11        | ENSG00000167522 | -870  | 0.83 | NA   | NA       | NA   | NA |
| chr16 | 89588816 | 89589058 | AC092123.1     | ENSG00000245196 | -312  | 1    | NA   | NA       | NA   | NA |
| chr16 | 89713911 | 89714850 | CHMP1A         | ENSG00000131165 | -1092 | 1    | NA   | NA       | NA   | NA |
| chr16 | 89977562 | 89977851 | RP11-566K11.1  | ENSG00000255773 | -821  | 1    | NA   | NA       | NA   | NA |
| chr17 | 28088027 | 28088607 | SSH2           | ENSG00000141298 | -22   | 0.65 | 0.27 | 3.00E-09 | 0.38 | NA |
| chr17 | 11900442 | 11900984 | ZNF18          | ENSG00000154957 | -24   | 0.33 | 0.1  | 6.40E-09 | 0.22 | NA |
| chr17 | 46669434 | 46669811 | RP11-357H14.7  | ENSG00000233101 | 1003  | 0.52 | 0.19 | 9.50E-09 | 0.32 | NA |
| chr17 | 4692249  | 4693977  | GLTPD2         | ENSG00000182327 | 806   | 0.37 | 0.2  | 1.30E-08 | 0.17 | NA |
| chr17 | 28562387 | 28563186 | SLC6A4         | ENSG00000108576 | -117  | 0.4  | 0.16 | 4.00E-08 | 0.24 | NA |

|       |          |          |            |                 |       |      |      |          |       |    |
|-------|----------|----------|------------|-----------------|-------|------|------|----------|-------|----|
| chr17 | 72889349 | 72890060 | FADS6      | ENSG00000172782 | 1     | 0.15 | 0.47 | 5.90E-08 | -0.32 | NA |
| chr17 | 46607804 | 46608390 | HOXB1      | ENSG00000120094 | 262   | 0.6  | 0.26 | 1.40E-07 | 0.34  | NA |
| chr17 | 38210767 | 38210975 | MED24      | ENSG00000008838 | -210  | 0.27 | 1    | 1.50E-07 | -0.73 | NA |
| chr17 | 61523000 | 61524470 | CYB561     | ENSG00000008283 | -190  | 0.29 | 0.15 | 1.60E-07 | 0.13  | NA |
| chr17 | 46710812 | 46711419 | HOXB7      | ENSG00000120087 | -181  | 0.41 | 0.17 | 1.80E-07 | 0.25  | NA |
| chr17 | 41363727 | 41364273 | TMEM106A   | ENSG00000184988 | 106   | 0.38 | 0.71 | 2.70E-07 | -0.32 | NA |
| chr17 | 71306975 | 71308682 | CDC42EP4   | ENSG00000179604 | 304   | 0.3  | 0.15 | 4.80E-07 | 0.15  | NA |
| chr17 | 40274523 | 40275360 | HSPB9      | ENSG00000197723 | 185   | 0.88 | 0.71 | 5.70E-07 | 0.17  | NA |
| chr17 | 79006584 | 79006835 | AC127496.3 | ENSG00000226137 | -1394 | 0.66 | 0.16 | 8.50E-07 | 0.51  | NA |
| chr17 | 8702342  | 8702824  | MFSD6L     | ENSG00000185156 | 84    | 0.37 | 0.19 | 8.60E-07 | 0.18  | NA |
| chr17 | 4802265  | 4805402  | C17orf107  | ENSG00000205710 | 1120  | 0.54 | 0.43 | 1.10E-06 | 0.11  | NA |
| chr17 | 4710014  | 4710960  | PLD2       | ENSG00000129219 | 96    | 0.27 | 0.12 | 2.00E-06 | 0.14  | NA |
| chr17 | 80208196 | 80208439 | AC132872.1 | ENSG00000184551 | 1374  | 0.83 | 0.55 | 4.20E-06 | 0.28  | NA |
| chr17 | 46048069 | 46048823 | CDK5RAP3   | ENSG00000108465 | 17    | 0.17 | 0.73 | 5.50E-06 | -0.56 | NA |
| chr17 | 73083866 | 73084495 | SLC16A5    | ENSG00000170190 | 125   | 0.45 | 0.29 | 6.30E-06 | 0.16  | NA |
| chr17 | 77020023 | 77020868 | C1QTNF1    | ENSG00000173918 | 194   | 0.29 | 0.15 | 7.40E-06 | 0.15  | NA |
| chr17 | 71160922 | 71162350 | SSTR2      | ENSG00000180616 | 476   | 0.23 | 0.12 | 7.50E-06 | 0.11  | NA |
| chr17 | 62657409 | 62658858 | SMURF2     | ENSG00000108854 | 253   | 0.29 | 0.16 | 8.90E-06 | 0.13  | NA |
| chr17 | 26988721 | 26989391 | SDF2       | ENSG00000132581 | -122  | 0.28 | 0.56 | 1.20E-05 | -0.29 | NA |
| chr17 | 1619204  | 1620062  | C17orf91   | ENSG00000186594 | -129  | 0.27 | 0.13 | 1.50E-05 | 0.14  | NA |
| chr17 | 74864170 | 74866657 | MGAT5B     | ENSG00000167889 | 875   | 0.29 | 0.2  | 1.60E-05 | 0.087 | NA |
| chr17 | 36728633 | 36729284 | SRCIN1     | ENSG0000017373  | 109   | 0.3  | 0.14 | 1.70E-05 | 0.16  | NA |
| chr17 | 27619491 | 27620393 | NUFIP2     | ENSG00000108256 | 1224  | 0.42 | 0.22 | 2.10E-05 | 0.2   | NA |
| chr17 | 79848512 | 79849981 | THOC4      | ENSG00000183684 | -365  | 0.17 | 0.32 | 2.40E-05 | -0.15 | NA |
| chr17 | 934417   | 935088   | ABR        | ENSG00000159842 | 310   | 0.22 | 0.41 | 2.70E-05 | -0.19 | NA |
| chr17 | 12692737 | 12693690 | ARHGAP44   | ENSG00000006740 | 384   | 0.28 | 0.15 | 3.00E-05 | 0.13  | NA |
| chr17 | 79503586 | 79504181 | FSCN2      | ENSG00000186765 | 711   | 0.2  | 0.38 | 3.40E-05 | -0.18 | NA |
| chr17 | 7164285  | 7166245  | CLDN7      | ENSG00000181885 | 999   | 0.29 | 0.2  | 3.50E-05 | 0.086 | NA |
| chr17 | 27717135 | 27718037 | TAOK1      | ENSG00000160551 | -357  | 0.22 | 0.45 | 3.80E-05 | -0.23 | NA |
| chr17 | 14204168 | 14207702 | HS3ST3B1   | ENSG00000125430 | 1535  | 0.25 | 0.18 | 4.50E-05 | 0.068 | NA |

|       |          |          |               |                 |       |      |      |          |       |    |
|-------|----------|----------|---------------|-----------------|-------|------|------|----------|-------|----|
| chr17 | 33446426 | 33447063 | RAD51L3       | ENSG00000185379 | -9    | 0.18 | 0.41 | 4.80E-05 | -0.23 | NA |
| chr17 | 60757172 | 60758288 | MRC2          | ENSG00000011028 | -1089 | 0.75 | 0.56 | 5.20E-05 | 0.19  | NA |
| chr17 | 1390456  | 1390786  | MYO1C         | ENSG00000197879 | -1151 | 0.69 | 0.32 | 9.00E-05 | 0.38  | NA |
| chr17 | 80054171 | 80054392 | FASN          | ENSG00000169710 | 1825  | 0.97 | 0.49 | 9.30E-05 | 0.48  | NA |
| chr17 | 7756572  | 7757652  | TMEM88        | ENSG00000167874 | -1272 | 0.91 | 0.8  | 0.00011  | 0.12  | NA |
| chr17 | 72356096 | 72356327 | BTBD17        | ENSG00000204347 | 1747  | 1    | 0.84 | 0.00012  | 0.16  | NA |
| chr17 | 1173535  | 1174733  | BHLHA9        | ENSG00000205899 | 281   | 0.52 | 0.39 | 0.00013  | 0.13  | NA |
| chr17 | 35968980 | 35969757 | SYNRG         | ENSG00000006114 | 61    | 0.13 | 0.25 | 0.00014  | -0.12 | NA |
| chr17 | 75368688 | 75370506 | 9-Sep         | ENSG00000184640 | 325   | 0.23 | 0.15 | 0.00017  | 0.082 | NA |
| chr17 | 34900150 | 34901450 | AC126327.1    | ENSG00000245538 | -122  | 0.12 | 0.23 | 0.00018  | -0.11 | NA |
| chr17 | 48712050 | 48712705 | ABCC3         | ENSG00000108846 | 239   | 0.29 | 0.15 | 0.00022  | 0.14  | NA |
| chr17 | 40118605 | 40119301 | CNP           | ENSG00000173786 | 194   | 0.28 | 0.15 | 0.00023  | 0.12  | NA |
| chr17 | 18217821 | 18219056 | TOP3A         | ENSG00000177302 | -408  | 0.33 | 0.21 | 0.00027  | 0.12  | NA |
| chr17 | 46685244 | 46685449 | HOXB7         | ENSG00000120087 | 342   | 0.53 | 0.3  | 0.00027  | 0.23  | NA |
| chr17 | 16118275 | 16119510 | NCOR1         | ENSG00000141027 | -177  | 0.29 | 0.17 | 3.00E-04 | 0.12  | NA |
| chr17 | 46675044 | 46675589 | HOXB6         | ENSG00000108511 | -820  | 0.17 | 0.32 | 3.00E-04 | -0.15 | NA |
| chr17 | 3791944  | 3792153  | CAMKK1        | ENSG00000004660 | 1990  | 0.88 | 0.36 | 0.00033  | 0.51  | NA |
| chr17 | 18266422 | 18267007 | SHMT1         | ENSG00000176974 | 7     | 0.26 | 0.14 | 0.00034  | 0.12  | NA |
| chr17 | 26645290 | 26645614 | TMEM97        | ENSG00000109084 | -709  | 0.29 | 0.11 | 0.00034  | 0.18  | NA |
| chr17 | 38443815 | 38444152 | CDC6          | ENSG00000094804 | 98    | 0.3  | 0.12 | 0.00038  | 0.17  | NA |
| chr17 | 46629553 | 46629816 | HOXB3         | ENSG00000120093 | 1600  | 0.55 | 0.26 | 4.00E-04 | 0.29  | NA |
| chr17 | 47091037 | 47091567 | RP11-501C14.6 | ENSG00000251461 | -215  | 0.2  | 0.42 | 0.00041  | -0.22 | NA |
| chr17 | 79920529 | 79920756 | NOTUM         | ENSG00000185269 | -926  | 0.44 | 0.81 | 0.00041  | -0.37 | NA |
| chr17 | 34135878 | 34137007 | TAF15         | ENSG00000172660 | -46   | 0.25 | 0.14 | 0.00042  | 0.11  | NA |
| chr17 | 6925400  | 6927527  | BCL6B         | ENSG00000161940 | 94    | 0.52 | 0.4  | 0.00043  | 0.12  | NA |
| chr17 | 4542715  | 4544934  | ALOX15        | ENSG00000161905 | 1134  | 0.38 | 0.21 | 0.00046  | 0.17  | NA |
| chr17 | 30185764 | 30186580 | C17orf79      | ENSG00000172301 | -79   | 0.29 | 0.16 | 5.00E-04 | 0.14  | NA |
| chr17 | 46507344 | 46507778 | SKAP1         | ENSG00000141293 | 33    | 0.28 | 0.12 | 5.00E-04 | 0.16  | NA |
| chr17 | 80200604 | 80200876 | AC132872.3    | ENSG00000245410 | 197   | 0.77 | 0.52 | 0.00051  | 0.24  | NA |
| chr17 | 7307206  | 7308626  | PLSCR3        | ENSG00000187838 | -500  | 0.27 | 0.15 | 0.00057  | 0.12  | NA |

|       |          |          |            |                 |       |      |      |         |        |    |
|-------|----------|----------|------------|-----------------|-------|------|------|---------|--------|----|
| chr17 | 45771107 | 45772993 | TBKBP1     | ENSG00000198933 | -580  | 0.3  | 0.19 | 0.00061 | 0.11   | NA |
| chr17 | 25620999 | 25621730 | WSB1       | ENSG00000109046 | 258   | 0.18 | 0.37 | 0.00065 | -0.19  | NA |
| chr17 | 79899019 | 79899491 | AC137723.5 | ENSG00000235296 | -490  | 0.6  | 0.88 | 0.00068 | -0.27  | NA |
| chr17 | 9479007  | 9479225  | STX8       | ENSG00000170310 | 159   | 0.13 | 0.32 | 0.00072 | -0.19  | NA |
| chr17 | 6945389  | 6947521  | SLC16A11   | ENSG00000174326 | 787   | 0.21 | 0.29 | 0.00081 | -0.084 | NA |
| chr17 | 72968167 | 72969164 | C17orf28   | ENSG00000167861 | 146   | 0.25 | 0.17 | 0.00089 | 0.083  | NA |
| chr17 | 80709052 | 80710843 | TBCD       | ENSG00000141556 | 7     | 0.17 | 0.26 | 0.00095 | -0.086 | NA |
| chr17 | 20223749 | 20225068 | CCDC144C   | ENSG00000154898 | -69   | 0.75 | 0.58 | 0.001   | 0.17   | NA |
| chr17 | 42733486 | 42734626 | C17orf104  | ENSG00000180336 | 294   | 0.39 | 0.26 | 0.0012  | 0.12   | NA |
| chr17 | 38497527 | 38498963 | RARA       | ENSG00000131759 | 605   | 0.24 | 0.32 | 0.0013  | -0.085 | NA |
| chr17 | 40936445 | 40936668 | WNK4       | ENSG00000126562 | -789  | 0.22 | 1    | 0.0013  | -0.78  | NA |
| chr17 | 60704542 | 60705943 | MRC2       | ENSG00000011028 | 480   | 0.29 | 0.21 | 0.0013  | 0.084  | NA |
| chr17 | 80416004 | 80417259 | NARF       | ENSG00000141562 | 571   | 0.25 | 0.17 | 0.0014  | 0.084  | NA |
| chr17 | 34122024 | 34122801 | MMP28      | ENSG00000129270 | 228   | 0.22 | 0.13 | 0.0016  | 0.089  | NA |
| chr17 | 47754870 | 47755772 | SPOP       | ENSG00000121067 | 44    | 0.34 | 0.22 | 0.0016  | 0.12   | NA |
| chr17 | 38935799 | 38936093 | KRT27      | ENSG00000171446 | -1674 | 0.6  | 0.44 | 0.0019  | 0.16   | NA |
| chr17 | 40831682 | 40832452 | CCR10      | ENSG00000184451 | 1794  | 0.7  | 0.42 | 0.0019  | 0.28   | NA |
| chr17 | 20945386 | 20945633 | USP22      | ENSG00000124422 | 77    | 0.46 | 0.19 | 0.002   | 0.27   | NA |
| chr17 | 30813177 | 30815239 | CDK5R1     | ENSG00000176749 | 571   | 0.23 | 0.16 | 0.002   | 0.074  | NA |
| chr17 | 17875167 | 17875933 | TOM1L2     | ENSG00000175662 | 161   | 0.31 | 0.2  | 0.0022  | 0.11   | NA |
| chr17 | 26554244 | 26555018 | AC061975.3 | ENSG00000250301 | 299   | 0.37 | 0.25 | 0.0023  | 0.11   | NA |
| chr17 | 37793265 | 37793722 | STARD3     | ENSG00000131748 | 175   | 0.23 | 0.4  | 0.0023  | -0.17  | NA |
| chr17 | 56564854 | 56565891 | HSF5       | ENSG00000176160 | 327   | 0.93 | 0.86 | 0.0024  | 0.067  | NA |
| chr17 | 65989221 | 65989646 | C17orf58   | ENSG00000186665 | 235   | 0.26 | 0.14 | 0.0024  | 0.12   | NA |
| chr17 | 18163685 | 18164672 | SMCR7      | ENSG00000177427 | 309   | 0.22 | 0.13 | 0.0027  | 0.092  | NA |
| chr17 | 40714087 | 40715282 | COASY      | ENSG00000068120 | 592   | 0.33 | 0.23 | 0.0027  | 0.1    | NA |
| chr17 | 59488115 | 59490485 | C17orf82   | ENSG00000187013 | 188   | 0.33 | 0.27 | 0.0028  | 0.069  | NA |
| chr17 | 25783099 | 25784358 | KSR1       | ENSG00000141068 | 58    | 0.27 | 0.18 | 0.0029  | 0.085  | NA |
| chr17 | 7108304  | 7108654  | DLG4       | ENSG00000132535 | -30   | 0.24 | 0.47 | 0.0032  | -0.23  | NA |
| chr17 | 1587787  | 1588400  | PRPF8      | ENSG00000174231 | 48    | 0.28 | 0.15 | 0.0033  | 0.12   | NA |

|       |          |          |              |                 |      |      |      |        |        |    |
|-------|----------|----------|--------------|-----------------|------|------|------|--------|--------|----|
| chr17 | 73583838 | 73586337 | MYO15B       | ENSG00000188126 | 948  | 0.27 | 0.21 | 0.0034 | 0.058  | NA |
| chr17 | 73520956 | 73522540 | LLGL2        | ENSG00000073350 | -35  | 0.25 | 0.18 | 0.0036 | 0.077  | NA |
| chr17 | 60885408 | 60885857 | 10-Mar       | ENSG00000173838 | 19   | 0.4  | 0.18 | 0.0038 | 0.22   | NA |
| chr17 | 42143654 | 42144096 | LSM12        | ENSG00000161654 | 228  | 0.21 | 0.12 | 0.004  | 0.086  | NA |
| chr17 | 77752051 | 77752772 | CBX2         | ENSG00000173894 | 434  | 0.21 | 0.36 | 0.0041 | -0.15  | NA |
| chr17 | 56736754 | 56736962 | U1           | ENSG00000202077 | -192 | 0.51 | 0.18 | 0.0042 | 0.33   | NA |
| chr17 | 75524589 | 75525152 | AC021683.1   | ENSG00000250179 | 663  | 0.26 | 0.63 | 0.0042 | -0.37  | NA |
| chr17 | 3599052  | 3599551  | P2RX5        | ENSG00000083454 | 26   | 0.24 | 0.14 | 0.0043 | 0.11   | NA |
| chr17 | 40761059 | 40761761 | TUBG1        | ENSG00000131462 | 52   | 0.18 | 0.32 | 0.0043 | -0.15  | NA |
| chr17 | 6898820  | 6900427  | ALOX12       | ENSG00000108839 | 239  | 0.56 | 0.48 | 0.0052 | 0.085  | NA |
| chr17 | 19140307 | 19141648 | EPN2         | ENSG00000072134 | 287  | 0.28 | 0.55 | 0.0053 | -0.27  | NA |
| chr17 | 40440188 | 40441014 | STAT5A       | ENSG00000126561 | 94   | 0.48 | 0.35 | 0.0053 | 0.13   | NA |
| chr17 | 36829692 | 36831500 | C17orf96     | ENSG00000179294 | 591  | 0.24 | 0.18 | 0.0057 | 0.065  | NA |
| chr17 | 27919874 | 27921105 | ANKRD13B     | ENSG00000198720 | 3    | 0.19 | 0.28 | 0.0057 | -0.093 | NA |
| chr17 | 72208474 | 72208902 | CTD-2514K5.2 | ENSG00000246731 | 759  | 0.48 | 0.69 | 0.0057 | -0.22  | NA |
| chr17 | 17183886 | 17184699 | COPS3        | ENSG00000141030 | -280 | 0.16 | 0.27 | 0.0058 | -0.11  | NA |
| chr17 | 19247785 | 19248069 | MIR1180      | ENSG00000221540 | -40  | 0.89 | 0.73 | 0.006  | 0.15   | NA |
| chr17 | 27139185 | 27139671 | C17orf63     | ENSG00000173065 | 25   | 0.31 | 0.15 | 0.0061 | 0.16   | NA |
| chr17 | 40539837 | 40540775 | STAT3        | ENSG00000168610 | 99   | 0.34 | 0.19 | 0.0063 | 0.15   | NA |
| chr17 | 7760281  | 7761680  | LSMD1        | ENSG00000183011 | -199 | 0.22 | 0.11 | 0.0065 | 0.1    | NA |
| chr17 | 14200579 | 14200996 | AC005224.1   | ENSG00000245153 | 130  | 0.32 | 0.62 | 0.0065 | -0.3   | NA |
| chr17 | 47653211 | 47654369 | NXPH3        | ENSG00000182575 | 570  | 0.26 | 0.18 | 0.0067 | 0.082  | NA |
| chr17 | 79935137 | 79936051 | ASPSCR1      | ENSG00000169696 | 168  | 0.25 | 0.17 | 0.0067 | 0.076  | NA |
| chr17 | 48048953 | 48050616 | DLX4         | ENSG00000108813 | 456  | 0.31 | 0.22 | 0.007  | 0.093  | NA |
| chr17 | 1082376  | 1083833  | ABR          | ENSG00000159842 | 27   | 0.26 | 0.19 | 0.0071 | 0.073  | NA |
| chr17 | 66453349 | 66454137 | WIPI1        | ENSG00000070540 | -123 | 0.18 | 0.3  | 0.0077 | -0.12  | NA |
| chr17 | 13972630 | 13973085 | COX10-AS1    | ENSG00000223385 | -82  | 0.12 | 0.25 | 0.0079 | -0.12  | NA |
| chr17 | 37380953 | 37382363 | STAC2        | ENSG00000141750 | 382  | 0.26 | 0.2  | 0.008  | 0.066  | NA |
| chr17 | 36955256 | 36956380 | PIP4K2B      | ENSG00000141720 | 340  | 0.25 | 0.18 | 0.0081 | 0.068  | NA |
| chr17 | 5025798  | 5027064  | ZNF232       | ENSG00000167840 | -34  | 0.2  | 0.29 | 0.0085 | -0.089 | NA |

|       |          |          |                |                 |      |      |      |        |        |    |
|-------|----------|----------|----------------|-----------------|------|------|------|--------|--------|----|
| chr17 | 40912816 | 40913553 | RAMP2          | ENSG00000131477 | -28  | 0.33 | 0.19 | 0.0088 | 0.13   | NA |
| chr17 | 50235175 | 50236466 | CA10           | ENSG00000154975 | -397 | 0.3  | 0.18 | 0.0094 | 0.11   | NA |
| chr17 | 20746783 | 20747635 | AC126365.7     | ENSG00000227287 | 583  | 0.38 | 0.23 | 0.0096 | 0.15   | NA |
| chr17 | 72209669 | 72210290 | TTYH2          | ENSG00000141540 | 326  | 0.43 | 0.62 | 0.0096 | -0.19  | NA |
| chr17 | 43224933 | 43227616 | HEXIM1         | ENSG00000186834 | 1590 | 0.21 | 0.12 | 0.01   | 0.082  | NA |
| chr17 | 48132994 | 48134084 | RP11-1094H24.4 | ENSG00000246640 | -436 | 0.19 | 0.13 | 0.01   | 0.068  | NA |
| chr17 | 18150279 | 18151172 | FLII           | ENSG00000177731 | 25   | 0.9  | 0.76 | 0.011  | 0.14   | NA |
| chr17 | 30593198 | 30594033 | RHBDL3         | ENSG00000141314 | 419  | 0.26 | 0.16 | 0.011  | 0.1    | NA |
| chr17 | 42287692 | 42288392 | UBTF           | ENSG00000108312 | 328  | 0.17 | 0.37 | 0.012  | -0.2   | NA |
| chr17 | 46620367 | 46621373 | HOXB2          | ENSG00000173917 | 401  | 0.26 | 0.18 | 0.012  | 0.08   | NA |
| chr17 | 66507790 | 66508956 | PRKAR1A        | ENSG00000108946 | 263  | 0.13 | 0.22 | 0.012  | -0.088 | NA |
| chr17 | 76777510 | 76778390 | CYTH1          | ENSG00000108669 | 404  | 0.23 | 0.16 | 0.012  | 0.074  | NA |
| chr17 | 1732834  | 1733612  | SMYD4          | ENSG00000186532 | -79  | 0.24 | 0.15 | 0.013  | 0.091  | NA |
| chr17 | 72868922 | 72869703 | FDXR           | ENSG00000161513 | -213 | 0.21 | 0.32 | 0.013  | -0.11  | NA |
| chr17 | 60555507 | 60557168 | TLK2           | ENSG00000146872 | -49  | 0.25 | 0.38 | 0.014  | -0.13  | NA |
| chr17 | 79139501 | 79140028 | AATK           | ENSG00000181409 | 53   | 0.24 | 0.15 | 0.014  | 0.09   | NA |
| chr17 | 40729444 | 40729965 | PSMC3IP        | ENSG00000131470 | 43   | 0.3  | 0.18 | 0.015  | 0.12   | NA |
| chr17 | 80408294 | 80408879 | C17orf62       | ENSG00000178927 | 28   | 0.22 | 0.31 | 0.015  | -0.09  | NA |
| chr17 | 8868469  | 8869372  | PIK3R5         | ENSG00000141506 | 104  | 0.38 | 0.29 | 0.016  | 0.095  | NA |
| chr17 | 12920956 | 12921566 | ELAC2          | ENSG00000006744 | 77   | 0.25 | 0.14 | 0.016  | 0.11   | NA |
| chr17 | 39683908 | 39684599 | KRT19          | ENSG00000171345 | 298  | 0.3  | 0.17 | 0.016  | 0.13   | NA |
| chr17 | 76127521 | 76128406 | TMC6           | ENSG00000141524 | 525  | 0.26 | 0.37 | 0.016  | -0.12  | NA |
| chr17 | 80541912 | 80542119 | snoU13         | ENSG00000238403 | 1634 | 0.8  | 0.93 | 0.016  | -0.13  | NA |
| chr17 | 45726673 | 45728222 | KPNB1          | ENSG00000108424 | 605  | 0.25 | 0.32 | 0.017  | -0.073 | NA |
| chr17 | 55038057 | 55038530 | COIL           | ENSG00000121058 | 118  | 0.16 | 0.42 | 0.017  | -0.26  | NA |
| chr17 | 73178062 | 73179242 | SUMO2          | ENSG00000188612 | 446  | 0.18 | 0.33 | 0.017  | -0.15  | NA |
| chr17 | 80605301 | 80606324 | WDR45L         | ENSG00000141580 | 353  | 0.2  | 0.31 | 0.017  | -0.11  | NA |
| chr17 | 7311672  | 7312063  | NLGN2          | ENSG00000169992 | 365  | 0.95 | 0.86 | 0.018  | 0.087  | NA |
| chr17 | 33700989 | 33701657 | SLFN11         | ENSG00000172716 | -681 | 0.18 | 0.32 | 0.018  | -0.14  | NA |
| chr17 | 46969695 | 46970125 | ATP5G1         | ENSG00000159199 | -217 | 0.17 | 0.44 | 0.018  | -0.28  | NA |

|       |          |          |               |                 |      |      |      |       |        |    |
|-------|----------|----------|---------------|-----------------|------|------|------|-------|--------|----|
| chr17 | 48045788 | 48047207 | DLX4          | ENSG00000108813 | 163  | 0.23 | 0.17 | 0.018 | 0.067  | NA |
| chr17 | 28927092 | 28928454 | AC005562.2    | ENSG00000248121 | -110 | 0.21 | 0.15 | 0.019 | 0.056  | NA |
| chr17 | 78193980 | 78194954 | SGSH          | ENSG00000181523 | -330 | 0.26 | 0.16 | 0.019 | 0.096  | NA |
| chr17 | 4688628  | 4689563  | VMO1          | ENSG00000182853 | 634  | 0.25 | 0.46 | 0.02  | -0.2   | NA |
| chr17 | 35849290 | 35850483 | DUSP14        | ENSG00000161326 | -51  | 0.22 | 0.15 | 0.02  | 0.066  | NA |
| chr17 | 48636103 | 48639279 | RP11-94C24.10 | ENSG00000250107 | -920 | 0.22 | 0.18 | 0.02  | 0.04   | NA |
| chr17 | 66255192 | 66255556 | ARSG          | ENSG00000141337 | 51   | 0.72 | 0.34 | 0.02  | 0.38   | NA |
| chr17 | 80186135 | 80189990 | SLC16A3       | ENSG00000141526 | 1769 | 0.33 | 0.28 | 0.02  | 0.055  | NA |
| chr17 | 17398248 | 17400346 | RASD1         | ENSG00000108551 | 410  | 0.17 | 0.22 | 0.021 | -0.044 | NA |
| chr17 | 42091712 | 42091948 | TMEM101       | ENSG00000091947 | 515  | 0.45 | 0.12 | 0.021 | 0.33   | NA |
| chr17 | 62206971 | 62208050 | ERN1          | ENSG00000178607 | -8   | 0.27 | 0.2  | 0.021 | 0.071  | NA |
| chr17 | 79603627 | 79603886 | NPLOC4        | ENSG00000182446 | 349  | 0.28 | 0.59 | 0.021 | -0.31  | NA |
| chr17 | 40086751 | 40087098 | AC091172.1    | ENSG00000204815 | 26   | 0.26 | 0.5  | 0.022 | -0.24  | NA |
| chr17 | 55333068 | 55334245 | MSI2          | ENSG00000153944 | 444  | 0.18 | 0.12 | 0.022 | 0.061  | NA |
| chr17 | 56031843 | 56033160 | CUEDC1        | ENSG00000180891 | 183  | 0.21 | 0.3  | 0.022 | -0.086 | NA |
| chr17 | 2206517  | 2207248  | SMG6          | ENSG00000070366 | -69  | 0.19 | 0.27 | 0.023 | -0.083 | NA |
| chr17 | 55162173 | 55163908 | AKAP1         | ENSG00000121057 | 489  | 0.28 | 0.22 | 0.023 | 0.059  | NA |
| chr17 | 62492882 | 62493323 | POLG2         | ENSG00000256525 | 82   | 0.12 | 0.22 | 0.023 | -0.098 | NA |
| chr17 | 74261127 | 74262282 | FAM100B       | ENSG00000185262 | 421  | 0.21 | 0.15 | 0.024 | 0.052  | NA |
| chr17 | 7486285  | 7487431  | MPDU1         | ENSG00000129255 | -116 | 0.69 | 0.58 | 0.025 | 0.11   | NA |
| chr17 | 61627221 | 61628290 | DCAF7         | ENSG00000136485 | -67  | 0.43 | 0.22 | 0.025 | 0.2    | NA |
| chr17 | 26971782 | 26972481 | KIAA0100      | ENSG00000007202 | 18   | 0.26 | 0.15 | 0.026 | 0.11   | NA |
| chr17 | 73266340 | 73268052 | MIF4GD        | ENSG00000125457 | 58   | 0.24 | 0.17 | 0.026 | 0.061  | NA |
| chr17 | 19436788 | 19437692 | SLC47A1       | ENSG00000142494 | 99   | 0.36 | 0.25 | 0.027 | 0.1    | NA |
| chr17 | 20945912 | 20947069 | USP22         | ENSG00000124422 | -138 | 0.26 | 0.17 | 0.027 | 0.085  | NA |
| chr17 | 38136650 | 38137490 | PSMD3         | ENSG00000108344 | 20   | 0.23 | 0.17 | 0.027 | 0.066  | NA |
| chr17 | 48070698 | 48072654 | DLX3          | ENSG00000064195 | -609 | 0.25 | 0.18 | 0.027 | 0.061  | NA |
| chr17 | 26684165 | 26684875 | POLDIP2       | ENSG00000004142 | -47  | 0.29 | 0.21 | 0.029 | 0.085  | NA |
| chr17 | 27332268 | 27333188 | SEZ6          | ENSG00000063015 | 315  | 0.16 | 0.11 | 0.029 | 0.055  | NA |
| chr17 | 45973465 | 45974254 | SP2           | ENSG00000167182 | 343  | 0.15 | 0.24 | 0.029 | -0.089 | NA |

|       |          |          |            |                 |       |      |      |       |        |    |
|-------|----------|----------|------------|-----------------|-------|------|------|-------|--------|----|
| chr17 | 7199710  | 7200009  | YBX2       | ENSG00000006047 | -1983 | 0.36 | 0.15 | 0.03  | 0.2    | NA |
| chr17 | 17206527 | 17207306 | NT5M       | ENSG00000205309 | 267   | 0.22 | 0.16 | 0.032 | 0.065  | NA |
| chr17 | 45330928 | 45331766 | C17orf57   | ENSG00000178852 | 139   | 0.23 | 0.16 | 0.032 | 0.071  | NA |
| chr17 | 12568667 | 12569335 | MYOCD      | ENSG00000141052 | -206  | 0.17 | 0.26 | 0.033 | -0.084 | NA |
| chr17 | 47572345 | 47575316 | NGFR       | ENSG00000064300 | 1175  | 0.23 | 0.18 | 0.033 | 0.046  | NA |
| chr17 | 57298305 | 57298645 | GDPD1      | ENSG00000153982 | 647   | 0.17 | 0.33 | 0.033 | -0.16  | NA |
| chr17 | 79008929 | 79009762 | BAIAP2     | ENSG00000175866 | 398   | 0.14 | 0.22 | 0.033 | -0.076 | NA |
| chr17 | 16945384 | 16946317 | MPRIP      | ENSG00000133030 | -224  | 0.24 | 0.16 | 0.034 | 0.085  | NA |
| chr17 | 43567613 | 43568371 | PLEKHM1    | ENSG00000225190 | 102   | 0.33 | 0.1  | 0.034 | 0.23   | NA |
| chr17 | 63051893 | 63053355 | GNA13      | ENSG00000120063 | 296   | 0.18 | 0.23 | 0.034 | -0.05  | NA |
| chr17 | 6459129  | 6459829  | PITPNM3    | ENSG00000091622 | 398   | 0.26 | 0.17 | 0.036 | 0.088  | NA |
| chr17 | 37607393 | 37607718 | MED1       | ENSG00000125686 | -34   | 0.57 | 0.27 | 0.036 | 0.3    | NA |
| chr17 | 79495005 | 79496291 | FSCN2      | ENSG00000186765 | 226   | 0.46 | 0.37 | 0.037 | 0.084  | NA |
| chr17 | 7141121  | 7143071  | PHF23      | ENSG00000040633 | 153   | 0.26 | 0.21 | 0.039 | 0.05   | NA |
| chr17 | 46702280 | 46704166 | HOXB9      | ENSG00000170689 | 497   | 0.22 | 0.27 | 0.039 | -0.053 | NA |
| chr17 | 72772244 | 72772692 | NAT9       | ENSG00000109065 | 2     | 0.3  | 0.16 | 0.039 | 0.14   | NA |
| chr17 | 79917286 | 79920022 | NOTUM      | ENSG00000185269 | -968  | 0.23 | 0.19 | 0.039 | 0.036  | NA |
| chr17 | 5094839  | 5095456  | ZNF594     | ENSG00000180626 | 31    | 0.13 | 0.18 | 0.04  | -0.053 | NA |
| chr17 | 73760694 | 73761269 | GALK1      | ENSG00000108479 | 280   | 0.27 | 0.19 | 0.04  | 0.08   | NA |
| chr17 | 45000214 | 45000698 | GOSR2      | ENSG00000108433 | -30   | 0.26 | 0.11 | 0.041 | 0.15   | NA |
| chr17 | 80477098 | 80478553 | FOXK2      | ENSG00000141568 | 236   | 0.23 | 0.18 | 0.042 | 0.049  | NA |
| chr17 | 7197431  | 7198417  | YBX2       | ENSG00000006047 | -48   | 0.2  | 0.27 | 0.042 | -0.07  | NA |
| chr17 | 17715696 | 17716219 | SREBF1     | ENSG00000072310 | 1126  | 0.38 | 0.48 | 0.042 | -0.1   | NA |
| chr17 | 63557692 | 63557931 | AXIN2      | ENSG00000168646 | -46   | 0.25 | 0.15 | 0.043 | 0.093  | NA |
| chr17 | 46908301 | 46908844 | CALCOCO2   | ENSG00000136436 | 222   | 0.43 | 1    | 0.044 | -0.57  | NA |
| chr17 | 76250252 | 76250828 | THA1P      | ENSG00000237627 | -43   | 0.14 | 0.27 | 0.044 | -0.12  | NA |
| chr17 | 79650194 | 79651447 | ARL16      | ENSG00000214087 | 134   | 0.25 | 0.19 | 0.044 | 0.062  | NA |
| chr17 | 49197522 | 49198474 | SPAG9      | ENSG00000008294 | 97    | 0.2  | 0.14 | 0.045 | 0.059  | NA |
| chr17 | 36609705 | 36610320 | AC124789.1 | ENSG00000228576 | -1369 | 0.24 | 0.16 | 0.046 | 0.081  | NA |
| chr17 | 38599270 | 38599524 | IGFBP4     | ENSG00000141753 | -305  | 0.14 | 0.44 | 0.046 | -0.31  | NA |



|       |          |          |          |                 |      |      |      |       |        |    |
|-------|----------|----------|----------|-----------------|------|------|------|-------|--------|----|
| chr17 | 78388437 | 78389722 | ENDOV    | ENSG00000173818 | 114  | 0.21 | 0.16 | 0.046 | 0.042  | NA |
| chr17 | 58227241 | 58227720 | CA4      | ENSG00000167434 | 178  | 0.25 | 0.18 | 0.047 | 0.07   | NA |
| chr17 | 72744428 | 72745952 | SLC9A3R1 | ENSG00000109062 | 427  | 0.24 | 0.19 | 0.048 | 0.055  | NA |
| chr17 | 4268625  | 4270155  | UBE2G1   | ENSG00000132388 | 579  | 0.25 | 0.2  | 0.049 | 0.049  | NA |
| chr17 | 79868687 | 79869811 | PCYT2    | ENSG00000185813 | -198 | 0.18 | 0.25 | 0.05  | -0.067 | NA |
| chr17 | 46114573 | 46115059 | MIR152   | ENSG00000207947 | -203 | 0.35 | 0.25 | 0.051 | 0.097  | NA |
| chr17 | 79761267 | 79762807 | GCGR     | ENSG00000215644 | 27   | 0.16 | 0.21 | 0.051 | -0.044 | NA |
| chr17 | 4458183  | 4458984  | MYBBP1A  | ENSG00000132382 | 96   | 0.22 | 0.14 | 0.052 | 0.081  | NA |
| chr17 | 39967407 | 39968604 | LEPREL4  | ENSG00000141696 | -84  | 0.16 | 0.23 | 0.052 | -0.07  | NA |
| chr17 | 29298046 | 29298606 | RNF135   | ENSG00000181481 | 248  | 0.51 | 0.35 | 0.053 | 0.16   | NA |
| chr17 | 47113256 | 47113490 | U6       | ENSG00000252636 | -341 | 0.51 | 0.66 | 0.053 | -0.15  | NA |
| chr17 | 58677223 | 58678217 | PPM1D    | ENSG00000170836 | 166  | 0.14 | 0.2  | 0.053 | -0.062 | NA |
| chr17 | 80674547 | 80675236 | FN3KRP   | ENSG00000141560 | 309  | 0.16 | 0.25 | 0.053 | -0.085 | NA |
| chr17 | 53045603 | 53046368 | COX11    | ENSG00000166260 | 79   | 0.27 | 0.14 | 0.054 | 0.13   | NA |
| chr17 | 7210224  | 7211740  | EIF5A    | ENSG00000132507 | 664  | 0.25 | 0.19 | 0.055 | 0.067  | NA |
| chr17 | 19880676 | 19881633 | AKAP10   | ENSG00000108599 | -162 | 0.22 | 0.16 | 0.055 | 0.063  | NA |
| chr17 | 40835731 | 40836267 | CNTNAP1  | ENSG00000108797 | 1367 | 0.29 | 1    | 0.056 | -0.71  | NA |
| chr17 | 259754   | 260306   | C17orf97 | ENSG00000187624 | -88  | 0.26 | 0.19 | 0.057 | 0.069  | NA |
| chr17 | 16592835 | 16594147 | CCDC144A | ENSG00000170160 | 640  | 0.93 | 0.87 | 0.059 | 0.063  | NA |
| chr17 | 40020980 | 40021924 | KLHL11   | ENSG00000178502 | 224  | 0.24 | 0.17 | 0.059 | 0.074  | NA |
| chr17 | 19265403 | 19266444 | B9D1     | ENSG00000108641 | -68  | 0.22 | 0.16 | 0.06  | 0.065  | NA |
| chr17 | 56356374 | 56357013 | MPO      | ENSG00000005381 | 1603 | 0.27 | 0.35 | 0.06  | -0.08  | NA |
| chr17 | 42401501 | 42402427 | SLC25A39 | ENSG00000013306 | 246  | 0.17 | 0.23 | 0.061 | -0.063 | NA |
| chr17 | 17739511 | 17740525 | SREBF1   | ENSG00000072310 | 113  | 0.19 | 0.25 | 0.062 | -0.054 | NA |
| chr17 | 38518965 | 38520264 | GJD3     | ENSG00000183153 | 453  | 0.28 | 0.22 | 0.062 | 0.058  | NA |
| chr17 | 48503056 | 48503887 | ACSF2    | ENSG00000167107 | -48  | 0.21 | 0.15 | 0.063 | 0.063  | NA |
| chr17 | 41173821 | 41174436 | VAT1     | ENSG00000108828 | 252  | 0.23 | 0.17 | 0.065 | 0.063  | NA |
| chr17 | 8533004  | 8534933  | MYH10    | ENSG00000133026 | 67   | 0.17 | 0.21 | 0.066 | -0.045 | NA |
| chr17 | 17584480 | 17586361 | RAI1     | ENSG00000108557 | 633  | 0.22 | 0.18 | 0.066 | 0.036  | NA |
| chr17 | 27949429 | 27950277 | CORO6    | ENSG00000167549 | 7    | 0.26 | 0.2  | 0.066 | 0.065  | NA |

|       |          |          |                |                 |      |      |      |       |        |    |
|-------|----------|----------|----------------|-----------------|------|------|------|-------|--------|----|
| chr17 | 37783314 | 37783919 | PPP1R1B        | ENSG00000131771 | 61   | 0.24 | 0.16 | 0.067 | 0.076  | NA |
| chr17 | 17991080 | 17991581 | DRG2           | ENSG00000108591 | 91   | 0.28 | 0.2  | 0.068 | 0.088  | NA |
| chr17 | 27918161 | 27918398 | ANKRD13B       | ENSG00000198720 | 1478 | 0.22 | 0.13 | 0.069 | 0.098  | NA |
| chr17 | 10600425 | 10601199 | SCO1           | ENSG00000133028 | 35   | 0.22 | 0.16 | 0.069 | 0.063  | NA |
| chr17 | 33468896 | 33469418 | NLE1           | ENSG00000073536 | 146  | 0.26 | 0.17 | 0.069 | 0.091  | NA |
| chr17 | 27046856 | 27047273 | RPL23A         | ENSG00000198242 | -33  | 0.12 | 0.2  | 0.07  | -0.088 | NA |
| chr17 | 8295899  | 8296320  | RNF222         | ENSG00000189051 | 698  | 0.51 | 0.89 | 0.071 | -0.38  | NA |
| chr17 | 41177336 | 41177593 | RND2           | ENSG00000108830 | 206  | 0.15 | 0.32 | 0.071 | -0.17  | NA |
| chr17 | 46723731 | 46724383 | RP11-357H14.20 | ENSG00000233283 | 328  | 0.37 | 0.21 | 0.071 | 0.16   | NA |
| chr17 | 7254622  | 7255808  | KCTD11         | ENSG00000213859 | 7    | 0.22 | 0.18 | 0.072 | 0.042  | NA |
| chr17 | 15902500 | 15903688 | TTC19          | ENSG00000011295 | 312  | 0.21 | 0.16 | 0.074 | 0.045  | NA |
| chr17 | 7982631  | 7983560  | AC129492.6     | ENSG00000214999 | 295  | 0.21 | 0.28 | 0.076 | -0.073 | NA |
| chr17 | 68164913 | 68165720 | KCNJ2          | ENSG00000123700 | -360 | 0.25 | 0.18 | 0.076 | 0.068  | NA |
| chr17 | 4634567  | 4635230  | MED11          | ENSG00000161920 | 175  | 0.19 | 0.33 | 0.077 | -0.14  | NA |
| chr17 | 31203451 | 31204185 | AC084809.2     | ENSG00000226377 | 41   | 0.14 | 0.2  | 0.077 | -0.058 | NA |
| chr17 | 72983621 | 72984591 | CDR2L          | ENSG00000109089 | 379  | 0.16 | 0.21 | 0.077 | -0.047 | NA |
| chr17 | 80055179 | 80057276 | FASN           | ENSG00000169710 | -121 | 0.2  | 0.16 | 0.077 | 0.037  | NA |
| chr17 | 8286376  | 8287336  | RPL26          | ENSG00000161970 | -288 | 0.29 | 0.2  | 0.078 | 0.09   | NA |
| chr17 | 47438906 | 47439938 | ZNF652         | ENSG00000198740 | -67  | 0.28 | 0.22 | 0.078 | 0.064  | NA |
| chr17 | 48206663 | 48207601 | SAMD14         | ENSG00000167100 | -14  | 0.21 | 0.16 | 0.078 | 0.055  | NA |
| chr17 | 43298725 | 43299640 | AC008105.1     | ENSG00000246393 | -50  | 0.2  | 0.16 | 0.08  | 0.046  | NA |
| chr17 | 27503598 | 27504014 | MYO18A         | ENSG00000196535 | -36  | 0.25 | 0.17 | 0.081 | 0.076  | NA |
| chr17 | 4842858  | 4843636  | RNF167         | ENSG00000108523 | -176 | 0.26 | 0.2  | 0.082 | 0.062  | NA |
| chr17 | 73717023 | 73717847 | ITGB4          | ENSG00000132470 | -81  | 0.24 | 0.32 | 0.082 | -0.075 | NA |
| chr17 | 19281000 | 19282541 | MAPK7          | ENSG00000166484 | 736  | 0.24 | 0.19 | 0.083 | 0.059  | NA |
| chr17 | 7591494  | 7591839  | WRAP53         | ENSG00000141499 | 27   | 0.25 | 0.45 | 0.084 | -0.2   | NA |
| chr17 | 28705363 | 28706818 | CPD            | ENSG00000108582 | 148  | 0.18 | 0.14 | 0.084 | 0.038  | NA |
| chr17 | 73452534 | 73452898 | KIAA0195       | ENSG00000177728 | 52   | 0.32 | 0.19 | 0.084 | 0.13   | NA |
| chr17 | 57642720 | 57643294 | DHX40          | ENSG00000108406 | 121  | 0.25 | 0.37 | 0.088 | -0.11  | NA |
| chr17 | 6939137  | 6940090  | SLC16A13       | ENSG00000174327 | 136  | 0.25 | 0.14 | 0.089 | 0.12   | NA |

|       |          |          |            |                 |       |      |      |       |        |    |
|-------|----------|----------|------------|-----------------|-------|------|------|-------|--------|----|
| chr17 | 6554832  | 6555585  | MED31      | ENSG00000108590 | -254  | 0.27 | 0.19 | 0.091 | 0.075  | NA |
| chr17 | 43971410 | 43975040 | MAPT       | ENSG00000186868 | 1477  | 0.21 | 0.14 | 0.091 | 0.074  | NA |
| chr17 | 79268367 | 79269467 | SLC38A10   | ENSG00000157637 | -203  | 0.24 | 0.18 | 0.091 | 0.053  | NA |
| chr17 | 27052941 | 27054084 | TLCD1      | ENSG00000160606 | -286  | 0.17 | 0.26 | 0.092 | -0.081 | NA |
| chr17 | 62501479 | 62503566 | CEP95      | ENSG00000257066 | 267   | 0.23 | 0.2  | 0.092 | 0.038  | NA |
| chr17 | 1388686  | 1389730  | MYO1C      | ENSG00000197879 | -157  | 0.27 | 0.23 | 0.093 | 0.044  | NA |
| chr17 | 41561040 | 41561370 | DHX8       | ENSG00000067596 | -126  | 0.44 | 0.21 | 0.095 | 0.22   | NA |
| chr17 | 5371848  | 5372318  | DHX33      | ENSG00000005100 | 98    | 0.23 | 0.18 | 0.096 | 0.054  | NA |
| chr17 | 29994    | 31868    | DOC2B      | ENSG00000187939 | 339   | 0.23 | 0.2  | 0.098 | 0.035  | NA |
| chr17 | 4736432  | 4737100  | MINK1      | ENSG00000141503 | 131   | 0.18 | 0.13 | 0.098 | 0.054  | NA |
| chr17 | 7492314  | 7492945  | SOX15      | ENSG00000129194 | 761   | 0.16 | 0.23 | 0.1   | -0.072 | NA |
| chr17 | 8924167  | 8926920  | NTN1       | ENSG00000065320 | 684   | 0.22 | 0.19 | 0.1   | 0.031  | NA |
| chr17 | 73780846 | 73781308 | UNK        | ENSG00000132478 | 396   | 0.16 | 0.24 | 0.1   | -0.087 | NA |
| chr17 | 81009245 | 81009999 | B3GNTL1    | ENSG00000175711 | 64    | 0.16 | 0.22 | 0.1   | -0.06  | NA |
| chr17 | 8152514  | 8152833  | PFAS       | ENSG00000178921 | 69    | 0.18 | 0.11 | 0.11  | 0.071  | NA |
| chr17 | 14202632 | 14203258 | HS3ST3B1   | ENSG00000125430 | -1455 | 0.22 | 0.3  | 0.11  | -0.075 | NA |
| chr17 | 18684525 | 18685009 | FAM18B1    | ENSG00000171928 | 140   | 0.1  | 0.46 | 0.11  | -0.36  | NA |
| chr17 | 34890466 | 34891480 | MYO19      | ENSG00000141140 | -250  | 0.16 | 0.21 | 0.11  | -0.052 | NA |
| chr17 | 38256635 | 38257082 | NR1D1      | ENSG00000126368 | 120   | 0.27 | 0.17 | 0.11  | 0.095  | NA |
| chr17 | 46687527 | 46688730 | HOXB7      | ENSG00000120087 | 251   | 0.25 | 0.2  | 0.11  | 0.044  | NA |
| chr17 | 58228061 | 58228361 | CA4        | ENSG00000167434 | 909   | 0.43 | 0.86 | 0.11  | -0.42  | NA |
| chr17 | 79212416 | 79213771 | C17orf56   | ENSG00000167302 | -238  | 0.17 | 0.22 | 0.11  | -0.05  | NA |
| chr17 | 80332182 | 80333671 | UTS2R      | ENSG00000181408 | 773   | 0.33 | 0.38 | 0.11  | -0.051 | NA |
| chr17 | 4890282  | 4890991  | AC004771.1 | ENSG00000203562 | 334   | 0.21 | 0.16 | 0.12  | 0.051  | NA |
| chr17 | 16472074 | 16472800 | ZNF287     | ENSG00000141040 | 46    | 0.16 | 0.24 | 0.12  | -0.075 | NA |
| chr17 | 16556713 | 16557203 | ZNF624     | ENSG00000197566 | 183   | 0.23 | 0.17 | 0.12  | 0.063  | NA |
| chr17 | 27224005 | 27224873 | FLOT2      | ENSG00000132589 | 188   | 0.29 | 0.22 | 0.12  | 0.067  | NA |
| chr17 | 29421595 | 29422067 | NF1        | ENSG00000196712 | -114  | 0.25 | 0.37 | 0.12  | -0.12  | NA |
| chr17 | 33814234 | 33814947 | SLFN12L    | ENSG00000205045 | 263   | 0.27 | 0.4  | 0.12  | -0.13  | NA |
| chr17 | 34957833 | 34958790 | MRM1       | ENSG00000129282 | 310   | 0.27 | 0.22 | 0.12  | 0.05   | NA |

|       |          |          |                |                 |       |      |      |      |        |    |
|-------|----------|----------|----------------|-----------------|-------|------|------|------|--------|----|
| chr17 | 46658948 | 46660003 | RP11-357H14.16 | ENSG00000257178 | 146   | 0.22 | 0.31 | 0.12 | -0.096 | NA |
| chr17 | 46670522 | 46671458 | HOXB5          | ENSG00000120075 | 333   | 0.16 | 0.29 | 0.12 | -0.13  | NA |
| chr17 | 48194634 | 48195085 | SAMD14         | ENSG00000167100 | 304   | 0.58 | 0.5  | 0.12 | 0.07   | NA |
| chr17 | 48585385 | 48586167 | RP11-94C24.6   | ENSG00000249451 | -87   | 0.17 | 0.24 | 0.12 | -0.067 | NA |
| chr17 | 62223224 | 62224124 | SNORD104       | ENSG00000199753 | 231   | 0.27 | 0.19 | 0.12 | 0.08   | NA |
| chr17 | 80085040 | 80085333 | CCDC57         | ENSG00000176155 | 1246  | 0.93 | 0.85 | 0.12 | 0.086  | NA |
| chr17 | 4900357  | 4901798  | INCA1          | ENSG00000196388 | -172  | 0.25 | 0.21 | 0.13 | 0.042  | NA |
| chr17 | 7464666  | 7465823  | SENP3          | ENSG00000161956 | -28   | 0.19 | 0.26 | 0.13 | -0.062 | NA |
| chr17 | 18761273 | 18761853 | PRPSAP2        | ENSG00000141127 | 143   | 0.18 | 0.13 | 0.13 | 0.058  | NA |
| chr17 | 26645860 | 26646605 | TMEM97         | ENSG00000109084 | 71    | 0.1  | 0.32 | 0.13 | -0.22  | NA |
| chr17 | 26925742 | 26926512 | AC005726.11    | ENSG00000227543 | 319   | 0.25 | 0.32 | 0.13 | -0.072 | NA |
| chr17 | 32366900 | 32367406 | TLK2P1         | ENSG00000226049 | -262  | 0.87 | 0.75 | 0.13 | 0.12   | NA |
| chr17 | 46619087 | 46619314 | RP11-357H14.12 | ENSG00000230148 | -817  | 0.32 | 0.5  | 0.13 | -0.18  | NA |
| chr17 | 48942949 | 48944943 | TOB1           | ENSG00000141232 | -240  | 0.22 | 0.18 | 0.13 | 0.048  | NA |
| chr17 | 15466359 | 15466843 | FAM18B2        | ENSG00000175106 | 161   | 0.22 | 0.12 | 0.14 | 0.097  | NA |
| chr17 | 1627745  | 1629897  | WDR81          | ENSG00000167716 | 987   | 0.4  | 0.46 | 0.14 | -0.053 | NA |
| chr17 | 4166705  | 4167353  | ANKFY1         | ENSG00000185722 | 245   | 0.26 | 0.21 | 0.14 | 0.059  | NA |
| chr17 | 4850942  | 4853907  | ENO3           | ENSG00000108515 | 1037  | 0.22 | 0.25 | 0.14 | -0.031 | NA |
| chr17 | 7284223  | 7284687  | TNK1           | ENSG00000174292 | 90    | 0.3  | 0.21 | 0.14 | 0.089  | NA |
| chr17 | 16255618 | 16257148 | CENPV          | ENSG00000166582 | 387   | 0.19 | 0.24 | 0.14 | -0.048 | NA |
| chr17 | 16394833 | 16395843 | C17orf76       | ENSG00000181350 | -6    | 0.19 | 0.23 | 0.14 | -0.04  | NA |
| chr17 | 33416129 | 33416578 | RFFL           | ENSG00000092871 | -39   | 0.15 | 0.2  | 0.14 | -0.054 | NA |
| chr17 | 38219084 | 38219880 | THRA           | ENSG00000126351 | 330   | 0.24 | 0.18 | 0.14 | 0.053  | NA |
| chr17 | 38472958 | 38473201 | RARA           | ENSG00000131759 | -1394 | 0.26 | 0.38 | 0.14 | -0.12  | NA |
| chr17 | 48172460 | 48172994 | PDK2           | ENSG00000005882 | 88    | 0.27 | 0.19 | 0.14 | 0.081  | NA |
| chr17 | 72732848 | 72733545 | RAB37          | ENSG00000172794 | 237   | 0.17 | 0.24 | 0.14 | -0.062 | NA |
| chr17 | 635203   | 636499   | FAM57A         | ENSG00000167695 | 4     | 0.23 | 0.18 | 0.15 | 0.045  | NA |
| chr17 | 42440522 | 42441281 | FAM171A2       | ENSG00000161682 | 342   | 0.18 | 0.14 | 0.15 | 0.043  | NA |
| chr17 | 47865974 | 47866724 | MYST2          | ENSG00000136504 | 306   | 0.23 | 0.17 | 0.15 | 0.054  | NA |
| chr17 | 56769865 | 56770295 | RAD51C         | ENSG00000108384 | 146   | 0.2  | 0.28 | 0.15 | -0.074 | NA |

|       |          |          |            |                 |       |      |      |      |        |    |
|-------|----------|----------|------------|-----------------|-------|------|------|------|--------|----|
| chr17 | 74135922 | 74137802 | AC018665.1 | ENSG00000247180 | 225   | 0.29 | 0.24 | 0.15 | 0.047  | NA |
| chr17 | 79678936 | 79679805 | SLC25A10   | ENSG00000183048 | 33    | 0.28 | 0.22 | 0.15 | 0.055  | NA |
| chr17 | 80250226 | 80251057 | AC132872.2 | ENSG00000244773 | 49    | 0.32 | 0.43 | 0.15 | -0.11  | NA |
| chr17 | 5322507  | 5323716  | RPAIN      | ENSG00000129197 | 150   | 0.25 | 0.2  | 0.16 | 0.051  | NA |
| chr17 | 17726855 | 17727282 | SREBF1     | ENSG00000072310 | -160  | 0.17 | 0.25 | 0.16 | -0.074 | NA |
| chr17 | 40120233 | 40120471 | CNP        | ENSG00000173786 | 1393  | 1    | 0.88 | 0.16 | 0.12   | NA |
| chr17 | 45055317 | 45056838 | RPRML      | ENSG00000179673 | 537   | 0.22 | 0.26 | 0.16 | -0.043 | NA |
| chr17 | 46184836 | 46185174 | SNX11      | ENSG0000002919  | 94    | 0.25 | 0.35 | 0.16 | -0.096 | NA |
| chr17 | 61514752 | 61515386 | CYB561     | ENSG00000008283 | 603   | 0.87 | 0.76 | 0.16 | 0.11   | NA |
| chr17 | 73257180 | 73258101 | GGA3       | ENSG00000125447 | 34    | 0.18 | 0.27 | 0.16 | -0.094 | NA |
| chr17 | 74580974 | 74582396 | ST6GALNAC2 | ENSG00000070731 | 460   | 0.21 | 0.18 | 0.16 | 0.035  | NA |
| chr17 | 79987983 | 79990315 | RAC3       | ENSG00000169750 | -383  | 0.25 | 0.22 | 0.16 | 0.035  | NA |
| chr17 | 2652454  | 2653372  | MIR1253    | ENSG00000221200 | -1437 | 0.38 | 0.29 | 0.17 | 0.095  | NA |
| chr17 | 7348274  | 7348830  | CHRNA1     | ENSG00000170175 | 172   | 0.38 | 0.26 | 0.17 | 0.12   | NA |
| chr17 | 7554139  | 7555338  | ATP1B2     | ENSG00000129244 | 484   | 0.17 | 0.25 | 0.17 | -0.083 | NA |
| chr17 | 15602778 | 15603315 | ZNF286A    | ENSG00000187607 | 155   | 0.24 | 0.15 | 0.17 | 0.09   | NA |
| chr17 | 27038084 | 27038919 | PROCA1     | ENSG00000167525 | -397  | 0.18 | 0.24 | 0.17 | -0.058 | NA |
| chr17 | 32484007 | 32484280 | ACCN1      | ENSG00000108684 | -592  | 0.31 | 0.2  | 0.17 | 0.11   | NA |
| chr17 | 37557366 | 37558982 | FBXL20     | ENSG00000108306 | -276  | 0.26 | 0.2  | 0.17 | 0.064  | NA |
| chr17 | 45266251 | 45266974 | CDC27      | ENSG00000004897 | -310  | 0.25 | 0.19 | 0.17 | 0.057  | NA |
| chr17 | 46654053 | 46654369 | HOXB3      | ENSG00000120093 | -1299 | 0.23 | 0.31 | 0.17 | -0.078 | NA |
| chr17 | 48041282 | 48043064 | U6         | ENSG00000199492 | 1367  | 0.28 | 0.32 | 0.17 | -0.039 | NA |
| chr17 | 56609025 | 56609583 | 4-Sep      | ENSG00000108387 | 107   | 0.34 | 0.24 | 0.17 | 0.1    | NA |
| chr17 | 73873528 | 73874923 | TRIM47     | ENSG00000132481 | 431   | 0.2  | 0.25 | 0.17 | -0.051 | NA |
| chr17 | 263083   | 263412   | AC108004.3 | ENSG00000241525 | 567   | 0.92 | 0.99 | 0.18 | -0.069 | NA |
| chr17 | 1011844  | 1012968  | ABR        | ENSG00000159842 | -82   | 0.17 | 0.21 | 0.18 | -0.04  | NA |
| chr17 | 4045792  | 4047367  | ZZEF1      | ENSG00000074755 | -265  | 0.29 | 0.2  | 0.18 | 0.09   | NA |
| chr17 | 4401959  | 4403323  | SPNS2      | ENSG00000183018 | 512   | 0.28 | 0.23 | 0.18 | 0.046  | NA |
| chr17 | 5019637  | 5019879  | USP6       | ENSG00000129204 | 25    | 0.41 | 0.58 | 0.18 | -0.17  | NA |
| chr17 | 7342829  | 7344028  | FGF11      | ENSG00000161958 | 739   | 0.25 | 0.31 | 0.18 | -0.063 | NA |

|       |          |          |             |                 |      |      |      |      |        |    |
|-------|----------|----------|-------------|-----------------|------|------|------|------|--------|----|
| chr17 | 37823693 | 37824989 | PNMT        | ENSG00000141744 | 107  | 0.31 | 0.26 | 0.18 | 0.047  | NA |
| chr17 | 72667195 | 72667710 | RAB37       | ENSG00000172794 | 196  | 0.25 | 0.17 | 0.18 | 0.081  | NA |
| chr17 | 899842   | 900763   | TIMM22      | ENSG00000177370 | -55  | 0.21 | 0.25 | 0.19 | -0.045 | NA |
| chr17 | 17685016 | 17687240 | RAI1        | ENSG00000108557 | 682  | 0.21 | 0.26 | 0.19 | -0.041 | NA |
| chr17 | 31254874 | 31255392 | TMEM98      | ENSG00000006042 | 205  | 0.38 | 0.28 | 0.19 | 0.11   | NA |
| chr17 | 37353205 | 37353877 | CACNB1      | ENSG00000067191 | 360  | 0.23 | 0.15 | 0.19 | 0.074  | NA |
| chr17 | 40985007 | 40985922 | PSME3       | ENSG00000131467 | 41   | 0.21 | 0.16 | 0.19 | 0.051  | NA |
| chr17 | 43238260 | 43239233 | HEXIM2      | ENSG00000168517 | 475  | 0.18 | 0.31 | 0.19 | -0.13  | NA |
| chr17 | 72199932 | 72200428 | RPL38       | ENSG00000172809 | 336  | 0.36 | 0.22 | 0.19 | 0.14   | NA |
| chr17 | 74303478 | 74304428 | QRICH2      | ENSG00000129646 | -307 | 0.98 | 0.96 | 0.19 | 0.017  | NA |
| chr17 | 74722031 | 74723420 | JMJD6       | ENSG00000070495 | -67  | 0.18 | 0.15 | 0.19 | 0.03   | NA |
| chr17 | 79884679 | 79887084 | MAFG        | ENSG00000197063 | -293 | 0.22 | 0.18 | 0.19 | 0.037  | NA |
| chr17 | 80655335 | 80657183 | RAB40B      | ENSG00000141542 | 339  | 0.2  | 0.18 | 0.19 | 0.027  | NA |
| chr17 | 3795519  | 3796868  | CAMKK1      | ENSG00000004660 | 144  | 0.24 | 0.2  | 0.2  | 0.041  | NA |
| chr17 | 6543354  | 6544563  | TXNDC17     | ENSG00000129235 | -120 | 0.23 | 0.18 | 0.2  | 0.046  | NA |
| chr17 | 42276906 | 42278143 | ATXN7L3     | ENSG00000087152 | -71  | 0.26 | 0.32 | 0.2  | -0.063 | NA |
| chr17 | 74235758 | 74237211 | RNF157      | ENSG00000141576 | -94  | 0.23 | 0.18 | 0.2  | 0.045  | NA |
| chr17 | 77922721 | 77922973 | TBC1D16     | ENSG00000167291 | 1790 | 0.98 | 0.92 | 0.2  | 0.057  | NA |
| chr17 | 79614850 | 79615559 | NPLOC4      | ENSG00000182446 | 1172 | 0.17 | 0.22 | 0.2  | -0.049 | NA |
| chr17 | 5185519  | 5185873  | RABEP1      | ENSG00000029725 | 138  | 0.11 | 0.18 | 0.21 | -0.072 | NA |
| chr17 | 22016769 | 22017189 | AC131055.14 | ENSG00000243564 | 1920 | 0.71 | 0.82 | 0.21 | -0.11  | NA |
| chr17 | 30333963 | 30334815 | LRRRC37B    | ENSG00000185158 | -648 | 0.26 | 0.16 | 0.21 | 0.1    | NA |
| chr17 | 37356486 | 37356945 | RPL19       | ENSG00000108298 | 179  | 0.26 | 0.19 | 0.21 | 0.063  | NA |
| chr17 | 38024145 | 38024637 | ZPBP2       | ENSG00000186075 | -78  | 0.28 | 0.34 | 0.21 | -0.053 | NA |
| chr17 | 43339124 | 43339832 | C17orf46    | ENSG00000184361 | -17  | 0.24 | 0.16 | 0.21 | 0.08   | NA |
| chr17 | 61919659 | 61920656 | SMARCD2     | ENSG00000108604 | -228 | 0.32 | 0.26 | 0.21 | 0.057  | NA |
| chr17 | 1933138  | 1933852  | DPH1        | ENSG00000108963 | 64   | 0.19 | 0.14 | 0.22 | 0.052  | NA |
| chr17 | 27276219 | 27278877 | PHF12       | ENSG00000109118 | 374  | 0.21 | 0.24 | 0.22 | -0.033 | NA |
| chr17 | 34948053 | 34948902 | DHRS11      | ENSG00000108272 | 148  | 0.24 | 0.2  | 0.22 | 0.039  | NA |
| chr17 | 46125046 | 46126233 | NFE2L1      | ENSG00000082641 | -47  | 0.23 | 0.17 | 0.22 | 0.058  | NA |

|       |          |          |               |                 |       |      |      |      |        |    |
|-------|----------|----------|---------------|-----------------|-------|------|------|------|--------|----|
| chr17 | 73851260 | 73852222 | WBP2          | ENSG00000132471 | -351  | 0.24 | 0.18 | 0.22 | 0.059  | NA |
| chr17 | 76228110 | 76228380 | TMEM235       | ENSG00000204278 | 123   | 0.28 | 0.21 | 0.22 | 0.069  | NA |
| chr17 | 6915824  | 6916201  | RNASEK        | ENSG00000219200 | 61    | 0.26 | 0.16 | 0.23 | 0.11   | NA |
| chr17 | 8023960  | 8024239  | ALOXE3        | ENSG00000179148 | -1865 | 0.29 | 0.19 | 0.23 | 0.1    | NA |
| chr17 | 33776553 | 33776888 | SLFN13        | ENSG00000154760 | -864  | 0.19 | 0.14 | 0.23 | 0.052  | NA |
| chr17 | 59940825 | 59941067 | BRIP1         | ENSG00000136492 | -191  | 0.23 | 0.17 | 0.23 | 0.066  | NA |
| chr17 | 75136325 | 75137730 | SEC14L1       | ENSG00000129657 | 22    | 0.22 | 0.19 | 0.23 | 0.029  | NA |
| chr17 | 78233888 | 78235283 | RNF213        | ENSG00000173821 | -80   | 0.24 | 0.19 | 0.23 | 0.047  | NA |
| chr17 | 10632789 | 10633490 | TMEM220       | ENSG00000187824 | 507   | 0.21 | 0.5  | 0.24 | -0.29  | NA |
| chr17 | 18906909 | 18908243 | FAM83G        | ENSG00000188522 | -195  | 0.39 | 0.35 | 0.24 | 0.036  | NA |
| chr17 | 40332597 | 40333471 | KCNH4         | ENSG00000089558 | 262   | 0.41 | 0.29 | 0.24 | 0.12   | NA |
| chr17 | 5342128  | 5342631  | C1QBP         | ENSG00000108561 | 92    | 0.19 | 0.14 | 0.25 | 0.054  | NA |
| chr17 | 7382266  | 7382710  | ZBTB4         | ENSG00000174282 | 456   | 0.33 | 0.21 | 0.25 | 0.11   | NA |
| chr17 | 7818938  | 7819763  | AC025335.1    | ENSG00000179859 | 239   | 0.2  | 0.25 | 0.25 | -0.046 | NA |
| chr17 | 14201726 | 14202052 | AC005224.1    | ENSG00000245153 | -972  | 0.35 | 0.49 | 0.25 | -0.14  | NA |
| chr17 | 17067576 | 17067940 | MPRIP         | ENSG00000133030 | -216  | 0.92 | 0.96 | 0.25 | -0.042 | NA |
| chr17 | 46178149 | 46178943 | CBX1          | ENSG00000108468 | 14    | 0.26 | 0.2  | 0.25 | 0.062  | NA |
| chr17 | 7475916  | 7477330  | EIF4A1        | ENSG00000161960 | 599   | 0.24 | 0.21 | 0.26 | 0.033  | NA |
| chr17 | 9066152  | 9066388  | NTN1          | ENSG00000065320 | 18    | 0.99 | 0.96 | 0.26 | 0.03   | NA |
| chr17 | 35715796 | 35716627 | ACACA         | ENSG00000132142 | -152  | 0.3  | 0.22 | 0.26 | 0.072  | NA |
| chr17 | 42785900 | 42786278 | DBF4B         | ENSG00000161692 | 113   | 0.12 | 0.17 | 0.26 | -0.055 | NA |
| chr17 | 47209811 | 47210740 | B4GALNT2      | ENSG00000167080 | 453   | 0.17 | 0.13 | 0.26 | 0.044  | NA |
| chr17 | 48474516 | 48475047 | LRRC59        | ENSG00000108829 | 133   | 0.22 | 0.14 | 0.26 | 0.076  | NA |
| chr17 | 58156010 | 58156427 | HEATR6        | ENSG00000068097 | 64    | 0.15 | 0.2  | 0.26 | -0.049 | NA |
| chr17 | 65373224 | 65375131 | PITPNC1       | ENSG00000154217 | 253   | 0.18 | 0.2  | 0.26 | -0.026 | NA |
| chr17 | 1944947  | 1945621  | OVCA2         | ENSG00000214014 | 7     | 0.16 | 0.19 | 0.27 | -0.039 | NA |
| chr17 | 2239630  | 2241547  | TSR1          | ENSG00000167721 | 90    | 0.17 | 0.2  | 0.27 | -0.025 | NA |
| chr17 | 45400874 | 45401440 | C17orf57      | ENSG00000178852 | 263   | 0.26 | 0.38 | 0.27 | -0.13  | NA |
| chr17 | 46810609 | 46810945 | CTD-2377D24.4 | ENSG00000242407 | 324   | 0.33 | 0.12 | 0.27 | 0.21   | NA |
| chr17 | 57183628 | 57184441 | AC099850.1    | ENSG00000224738 | 75    | 0.17 | 0.2  | 0.27 | -0.035 | NA |

|       |          |          |                |                 |       |      |      |      |        |    |
|-------|----------|----------|----------------|-----------------|-------|------|------|------|--------|----|
| chr17 | 65040729 | 65041029 | CACNG1         | ENSG00000108878 | 173   | 0.91 | 1    | 0.27 | -0.087 | NA |
| chr17 | 72426783 | 72428977 | GPRC5C         | ENSG00000170412 | 828   | 0.21 | 0.19 | 0.27 | 0.025  | NA |
| chr17 | 79875425 | 79876124 | SIRT7          | ENSG00000187531 | 266   | 0.32 | 0.26 | 0.27 | 0.062  | NA |
| chr17 | 3571224  | 3572618  | TAX1BP3        | ENSG00000213977 | 55    | 0.18 | 0.21 | 0.28 | -0.032 | NA |
| chr17 | 61850684 | 61852062 | CCDC47         | ENSG00000108588 | -443  | 0.22 | 0.24 | 0.28 | -0.026 | NA |
| chr17 | 73008562 | 73009170 | ICT1           | ENSG00000167862 | 86    | 0.16 | 0.21 | 0.28 | -0.042 | NA |
| chr17 | 77901065 | 77901333 | AC100791.3     | ENSG00000248706 | -675  | 0.9  | 0.82 | 0.28 | 0.085  | NA |
| chr17 | 79846204 | 79846486 | THOC4          | ENSG00000183684 | 518   | 0.88 | 0.93 | 0.28 | -0.048 | NA |
| chr17 | 1302606  | 1303889  | YWHAE          | ENSG00000108953 | 182   | 0.25 | 0.22 | 0.29 | 0.029  | NA |
| chr17 | 2614320  | 2615630  | KIAA0664       | ENSG00000132361 | -48   | 0.23 | 0.18 | 0.29 | 0.05   | NA |
| chr17 | 7218175  | 7218960  | GPS2           | ENSG00000132522 | -125  | 0.23 | 0.19 | 0.29 | 0.036  | NA |
| chr17 | 11501631 | 11502328 | DNAH9          | ENSG00000007174 | 231   | 0.31 | 0.22 | 0.29 | 0.091  | NA |
| chr17 | 19770306 | 19771508 | ULK2           | ENSG00000083290 | 323   | 0.2  | 0.23 | 0.29 | -0.035 | NA |
| chr17 | 48613878 | 48614466 | EPN3           | ENSG00000049283 | 384   | 0.94 | 0.98 | 0.29 | -0.037 | NA |
| chr17 | 73774789 | 73776044 | H3F3B          | ENSG00000132475 | 444   | 0.24 | 0.2  | 0.29 | 0.036  | NA |
| chr17 | 73936881 | 73937417 | FBF1           | ENSG00000188878 | -43   | 0.13 | 0.17 | 0.29 | -0.036 | NA |
| chr17 | 78074902 | 78075761 | GAA            | ENSG00000171298 | -24   | 0.21 | 0.18 | 0.29 | 0.031  | NA |
| chr17 | 15165796 | 15166506 | PMP22          | ENSG00000109099 | -350  | 0.4  | 0.24 | 0.3  | 0.16   | NA |
| chr17 | 26898105 | 26898781 | PIGS           | ENSG00000087111 | 71    | 0.23 | 0.28 | 0.3  | -0.048 | NA |
| chr17 | 28443746 | 28444011 | CCDC55         | ENSG00000126653 | 79    | 0.13 | 0.27 | 0.3  | -0.14  | NA |
| chr17 | 34842308 | 34842930 | ZNHIT3         | ENSG00000108278 | 140   | 0.17 | 0.23 | 0.3  | -0.063 | NA |
| chr17 | 45908784 | 45909067 | MRPL10         | ENSG00000159111 | -42   | 0.14 | 0.18 | 0.3  | -0.041 | NA |
| chr17 | 4613400  | 4614423  | ARRB2          | ENSG00000141480 | 127   | 0.24 | 0.21 | 0.31 | 0.034  | NA |
| chr17 | 36412765 | 36413545 | RP11-1407O15.2 | ENSG00000174093 | -22   | 0.2  | 0.09 | 0.31 | 0.11   | NA |
| chr17 | 36858278 | 36861697 | MLLT6          | ENSG00000108292 | -1808 | 0.27 | 0.25 | 0.31 | 0.022  | NA |
| chr17 | 42219153 | 42219616 | C17orf53       | ENSG00000125319 | 110   | 0.23 | 0.18 | 0.31 | 0.051  | NA |
| chr17 | 46631800 | 46632212 | HOXB3          | ENSG00000120093 | -722  | 0.24 | 0.18 | 0.31 | 0.055  | NA |
| chr17 | 2496493  | 2498023  | PAFAH1B1       | ENSG00000007168 | 335   | 0.24 | 0.21 | 0.32 | 0.027  | NA |
| chr17 | 40976159 | 40976421 | BECN1          | ENSG00000126581 | 11    | 0.19 | 0.14 | 0.32 | 0.052  | NA |
| chr17 | 17108771 | 17109701 | PLD6           | ENSG00000179598 | 396   | 0.23 | 0.27 | 0.33 | -0.049 | NA |



|       |          |          |            |                 |      |      |      |      |        |    |
|-------|----------|----------|------------|-----------------|------|------|------|------|--------|----|
| chr17 | 47072820 | 47076042 | IGF2BP1    | ENSG00000159217 | -343 | 0.23 | 0.21 | 0.33 | 0.021  | NA |
| chr17 | 53828422 | 53828738 | PCTP       | ENSG00000141179 | -181 | 0.26 | 0.32 | 0.33 | -0.067 | NA |
| chr17 | 72855621 | 72858012 | GRIN2C     | ENSG00000161509 | -818 | 0.22 | 0.25 | 0.33 | -0.027 | NA |
| chr17 | 8092418  | 8093706  | C17orf59   | ENSG00000196544 | 502  | 0.21 | 0.19 | 0.34 | 0.024  | NA |
| chr17 | 30469332 | 30469942 | RHOT1      | ENSG00000126858 | 164  | 0.2  | 0.16 | 0.34 | 0.037  | NA |
| chr17 | 42263945 | 42264804 | C17orf65   | ENSG00000168597 | -292 | 0.25 | 0.33 | 0.34 | -0.085 | NA |
| chr17 | 46690390 | 46691055 | HOXB8      | ENSG00000120068 | 119  | 0.14 | 0.19 | 0.34 | -0.052 | NA |
| chr17 | 61699007 | 61700728 | MAP3K3     | ENSG00000198909 | 66   | 0.15 | 0.18 | 0.34 | -0.027 | NA |
| chr17 | 73127196 | 73127995 | NT5C       | ENSG00000125458 | 282  | 0.21 | 0.25 | 0.34 | -0.042 | NA |
| chr17 | 8059556  | 8060237  | PER1       | ENSG00000179094 | -218 | 0.29 | 0.35 | 0.35 | -0.063 | NA |
| chr17 | 8151126  | 8151520  | CTC1       | ENSG00000178971 | 90   | 0.17 | 0.25 | 0.35 | -0.077 | NA |
| chr17 | 36003250 | 36003528 | DDX52      | ENSG00000141141 | 85   | 0.28 | 0.22 | 0.35 | 0.062  | NA |
| chr17 | 55927212 | 55928098 | MRPS23     | ENSG00000181610 | -256 | 0.18 | 0.24 | 0.35 | -0.054 | NA |
| chr17 | 3749138  | 3749778  | C17orf85   | ENSG00000074356 | 82   | 0.21 | 0.18 | 0.36 | 0.031  | NA |
| chr17 | 15244705 | 15245126 | TEKT3      | ENSG00000125409 | -16  | 0.2  | 0.28 | 0.36 | -0.079 | NA |
| chr17 | 45773451 | 45773695 | TBKBP1     | ENSG00000198933 | 943  | 0.92 | 0.83 | 0.36 | 0.085  | NA |
| chr17 | 46800533 | 46800746 | HOXB13-AS1 | ENSG00000229637 | 109  | 0.76 | 0.5  | 0.36 | 0.26   | NA |
| chr17 | 61926232 | 61926943 | AC015651.1 | ENSG00000240280 | -65  | 0.18 | 0.14 | 0.36 | 0.043  | NA |
| chr17 | 3626924  | 3627839  | GSG2       | ENSG00000177602 | 170  | 0.21 | 0.25 | 0.37 | -0.035 | NA |
| chr17 | 9808067  | 9808339  | RCVRN      | ENSG00000109047 | 481  | 0.94 | 1    | 0.37 | -0.056 | NA |
| chr17 | 38255274 | 38255896 | NR1D1      | ENSG00000126368 | 1393 | 0.2  | 0.16 | 0.37 | 0.039  | NA |
| chr17 | 74732345 | 74734222 | MIR636     | ENSG00000207556 | -653 | 0.24 | 0.22 | 0.37 | 0.019  | NA |
| chr17 | 79669571 | 79670811 | SLC25A10   | ENSG00000183048 | -213 | 0.22 | 0.19 | 0.37 | 0.028  | NA |
| chr17 | 1613226  | 1614110  | TLCD2      | ENSG00000185561 | -17  | 0.25 | 0.22 | 0.38 | 0.034  | NA |
| chr17 | 2302892  | 2305402  | MNT        | ENSG00000070444 | 207  | 0.18 | 0.2  | 0.38 | -0.018 | NA |
| chr17 | 20492358 | 20492695 | MEIS3P2    | ENSG00000188013 | 155  | 0.26 | 0.2  | 0.38 | 0.058  | NA |
| chr17 | 21187552 | 21188443 | MAP2K3     | ENSG00000034152 | 13   | 0.19 | 0.22 | 0.38 | -0.03  | NA |
| chr17 | 36762334 | 36763118 | SRCIN1     | ENSG00000017373 | -543 | 0.23 | 0.18 | 0.38 | 0.044  | NA |
| chr17 | 41855634 | 41856346 | DUSP3      | ENSG00000108861 | 315  | 0.25 | 0.2  | 0.38 | 0.047  | NA |
| chr17 | 73974971 | 73975731 | ACOX1      | ENSG00000161533 | -142 | 0.24 | 0.2  | 0.38 | 0.041  | NA |

|       |          |          |            |                 |       |      |      |      |        |    |
|-------|----------|----------|------------|-----------------|-------|------|------|------|--------|----|
| chr17 | 8339002  | 8339960  | NDEL1      | ENSG00000166579 | 302   | 0.18 | 0.21 | 0.39 | -0.023 | NA |
| chr17 | 38501396 | 38501839 | RARA       | ENSG00000131759 | 124   | 0.2  | 0.11 | 0.39 | 0.085  | NA |
| chr17 | 46985588 | 46986537 | UBE2Z      | ENSG00000159202 | 331   | 0.17 | 0.15 | 0.39 | 0.022  | NA |
| chr17 | 56832961 | 56833986 | PPM1E      | ENSG00000175175 | 241   | 0.23 | 0.2  | 0.39 | 0.022  | NA |
| chr17 | 64298047 | 64299617 | PRKCA      | ENSG00000154229 | -112  | 0.27 | 0.24 | 0.39 | 0.026  | NA |
| chr17 | 76836060 | 76837438 | USP36      | ENSG00000055483 | -140  | 0.18 | 0.15 | 0.39 | 0.03   | NA |
| chr17 | 40074291 | 40075380 | ACLY       | ENSG00000131473 | 401   | 0.23 | 0.26 | 0.4  | -0.035 | NA |
| chr17 | 42092143 | 42092432 | TMEM101    | ENSG00000091947 | 58    | 0.24 | 0.33 | 0.4  | -0.091 | NA |
| chr17 | 79894668 | 79895533 | PYCR1      | ENSG00000183010 | -132  | 0.23 | 0.2  | 0.4  | 0.038  | NA |
| chr17 | 28618370 | 28619273 | BLMH       | ENSG00000108578 | 46    | 0.2  | 0.16 | 0.41 | 0.04   | NA |
| chr17 | 38803944 | 38804703 | SMARCE1    | ENSG00000073584 | -258  | 0.19 | 0.23 | 0.41 | -0.037 | NA |
| chr17 | 79859808 | 79860963 | NPB        | ENSG00000183979 | 313   | 0.22 | 0.18 | 0.41 | 0.032  | NA |
| chr17 | 7339808  | 7340896  | TMEM102    | ENSG00000181284 | 1579  | 0.23 | 0.25 | 0.42 | -0.026 | NA |
| chr17 | 17140117 | 17141080 | FLCN       | ENSG00000154803 | -145  | 0.18 | 0.23 | 0.42 | -0.051 | NA |
| chr17 | 28256826 | 28257408 | EFCAB5     | ENSG00000176927 | 243   | 0.18 | 0.36 | 0.42 | -0.18  | NA |
| chr17 | 36102033 | 36104766 | HNF1B      | ENSG00000108753 | 1610  | 0.23 | 0.25 | 0.42 | -0.018 | NA |
| chr17 | 40688033 | 40688745 | NAGLU      | ENSG00000108784 | 121   | 0.22 | 0.18 | 0.42 | 0.033  | NA |
| chr17 | 41910030 | 41910818 | MPP3       | ENSG00000161647 | 90    | 0.24 | 0.19 | 0.42 | 0.059  | NA |
| chr17 | 61904726 | 61905184 | PSMC5      | ENSG00000087191 | 145   | 0.11 | 0.12 | 0.42 | -0.02  | NA |
| chr17 | 76309952 | 76310551 | AC061992.2 | ENSG00000238167 | -1559 | 0.2  | 0.16 | 0.42 | 0.038  | NA |
| chr17 | 79826700 | 79827675 | ARHGDIA    | ENSG00000141522 | 1603  | 0.52 | 0.56 | 0.42 | -0.037 | NA |
| chr17 | 26368586 | 26369133 | NLK        | ENSG00000087095 | -323  | 0.23 | 0.28 | 0.43 | -0.052 | NA |
| chr17 | 30770960 | 30772137 | PSMD11     | ENSG00000108671 | 46    | 0.24 | 0.2  | 0.43 | 0.038  | NA |
| chr17 | 36886108 | 36886525 | CISD3      | ENSG00000230055 | -194  | 0.2  | 0.39 | 0.43 | -0.19  | NA |
| chr17 | 40119811 | 40120047 | CNP        | ENSG00000173786 | 970   | 0.94 | 0.71 | 0.43 | 0.22   | NA |
| chr17 | 5973315  | 5974449  | WSCD1      | ENSG00000179314 | -52   | 0.27 | 0.24 | 0.44 | 0.034  | NA |
| chr17 | 26219938 | 26220475 | C17orf108  | ENSG00000232859 | 179   | 0.23 | 0.26 | 0.44 | -0.033 | NA |
| chr17 | 27942532 | 27945388 | CORO6      | ENSG00000167549 | 1175  | 0.23 | 0.25 | 0.44 | -0.019 | NA |
| chr17 | 30228604 | 30228962 | UTP6       | ENSG00000108651 | -52   | 0.2  | 0.14 | 0.44 | 0.059  | NA |
| chr17 | 79478235 | 79482426 | ACTG1      | ENSG00000184009 | -503  | 0.23 | 0.21 | 0.44 | 0.014  | NA |

|       |          |          |            |                 |       |      |      |      |        |    |
|-------|----------|----------|------------|-----------------|-------|------|------|------|--------|----|
| chr17 | 79828636 | 79830135 | ARHGDI A   | ENSG00000141522 | -595  | 0.23 | 0.2  | 0.44 | 0.026  | NA |
| chr17 | 685150   | 685988   | GLOD4      | ENSG00000167699 | -62   | 0.21 | 0.24 | 0.45 | -0.031 | NA |
| chr17 | 4487398  | 4488482  | SMTNL2     | ENSG00000188176 | 106   | 0.17 | 0.19 | 0.45 | -0.022 | NA |
| chr17 | 8024758  | 8026862  | HES7       | ENSG00000179111 | 1600  | 0.21 | 0.19 | 0.45 | 0.016  | NA |
| chr17 | 10101034 | 10102440 | GAS7       | ENSG00000007237 | 131   | 0.2  | 0.22 | 0.45 | -0.019 | NA |
| chr17 | 19912539 | 19913409 | SPECC1     | ENSG00000128487 | 360   | 0.24 | 0.21 | 0.45 | 0.023  | NA |
| chr17 | 36584420 | 36585453 | ARHGAP23   | ENSG00000225485 | 216   | 0.26 | 0.22 | 0.45 | 0.037  | NA |
| chr17 | 40573740 | 40575526 | PTRF       | ENSG00000177469 | 482   | 0.23 | 0.2  | 0.45 | 0.027  | NA |
| chr17 | 40935964 | 40936180 | WNK4       | ENSG00000126562 | 445   | 0.24 | 0.31 | 0.45 | -0.062 | NA |
| chr17 | 42836548 | 42836932 | ADAM11     | ENSG00000073670 | 172   | 0.26 | 0.35 | 0.45 | -0.087 | NA |
| chr17 | 47091973 | 47092211 | IGF2BP1    | ENSG00000159217 | 813   | 0.82 | 1    | 0.45 | -0.18  | NA |
| chr17 | 60142247 | 60143516 | MED13      | ENSG00000108510 | -238  | 0.21 | 0.19 | 0.45 | 0.023  | NA |
| chr17 | 70587771 | 70589080 | AC007639.1 | ENSG00000227036 | 516   | 0.19 | 0.22 | 0.45 | -0.029 | NA |
| chr17 | 75447477 | 75447821 | 9-Sep      | ENSG00000184640 | 1036  | 0.24 | 0.33 | 0.45 | -0.094 | NA |
| chr17 | 33700487 | 33700760 | SLFN11     | ENSG00000172716 | 3     | 0.16 | 0.22 | 0.46 | -0.067 | NA |
| chr17 | 41622604 | 41624165 | ETV4       | ENSG00000175832 | -303  | 0.2  | 0.18 | 0.46 | 0.019  | NA |
| chr17 | 42906810 | 42908061 | GJC1       | ENSG00000182963 | 172   | 0.22 | 0.24 | 0.46 | -0.027 | NA |
| chr17 | 58041846 | 58042463 | RNFT1      | ENSG00000189050 | -74   | 0.18 | 0.21 | 0.46 | -0.038 | NA |
| chr17 | 58754625 | 58755480 | BCAS3      | ENSG00000141376 | -120  | 0.34 | 0.28 | 0.46 | 0.053  | NA |
| chr17 | 72918995 | 72921019 | USH1G      | ENSG00000182040 | -656  | 0.28 | 0.25 | 0.46 | 0.027  | NA |
| chr17 | 36903871 | 36906328 | PCGF2      | ENSG00000056661 | -541  | 0.23 | 0.21 | 0.47 | 0.018  | NA |
| chr17 | 48276877 | 48279008 | COL1A1     | ENSG00000108821 | -390  | 0.27 | 0.24 | 0.47 | 0.024  | NA |
| chr17 | 5389390  | 5390283  | DERL2      | ENSG00000072849 | -299  | 0.22 | 0.18 | 0.48 | 0.044  | NA |
| chr17 | 8028781  | 8029012  | HES7       | ENSG00000179111 | -1486 | 0.16 | 0.29 | 0.48 | -0.12  | NA |
| chr17 | 8191864  | 8192495  | RANGRF     | ENSG00000108961 | 210   | 0.23 | 0.2  | 0.48 | 0.029  | NA |
| chr17 | 33775294 | 33775794 | SLFN13     | ENSG00000154760 | -156  | 0.3  | 0.39 | 0.48 | -0.088 | NA |
| chr17 | 43024658 | 43025344 | KIF18B     | ENSG00000186185 | 81    | 0.25 | 0.22 | 0.48 | 0.035  | NA |
| chr17 | 48423773 | 48424111 | XYLT2      | ENSG00000015532 | 445   | 0.17 | 0.21 | 0.48 | -0.043 | NA |
| chr17 | 26662071 | 26663048 | IFT20      | ENSG00000109083 | -83   | 0.21 | 0.19 | 0.49 | 0.026  | NA |
| chr17 | 29151481 | 29151901 | CRLF3      | ENSG00000176390 | -2    | 0.17 | 0.11 | 0.49 | 0.061  | NA |

|       |          |          |            |                 |       |      |      |      |        |    |
|-------|----------|----------|------------|-----------------|-------|------|------|------|--------|----|
| chr17 | 35766664 | 35767335 | ACACA      | ENSG00000132142 | -128  | 0.2  | 0.23 | 0.49 | -0.03  | NA |
| chr17 | 41150292 | 41150649 | RPL27      | ENSG00000131469 | 24    | 0.28 | 0.33 | 0.49 | -0.054 | NA |
| chr17 | 46691520 | 46692097 | HOXB8      | ENSG00000120068 | 670   | 0.23 | 0.31 | 0.49 | -0.083 | NA |
| chr17 | 46805553 | 46806148 | HOXB13     | ENSG00000159184 | 690   | 0.21 | 0.18 | 0.49 | 0.032  | NA |
| chr17 | 58603022 | 58603710 | APPBP2     | ENSG00000062725 | 214   | 0.15 | 0.13 | 0.49 | 0.024  | NA |
| chr17 | 66097528 | 66098631 | AC005332.1 | ENSG00000237854 | 371   | 0.24 | 0.22 | 0.49 | 0.026  | NA |
| chr17 | 73149830 | 73150885 | HN1        | ENSG00000189159 | -436  | 0.18 | 0.16 | 0.49 | 0.019  | NA |
| chr17 | 37617531 | 37618045 | CDK12      | ENSG00000167258 | 49    | 0.28 | 0.36 | 0.5  | -0.074 | NA |
| chr17 | 617755   | 618559   | VPS53      | ENSG00000141252 | -208  | 0.21 | 0.19 | 0.5  | 0.021  | NA |
| chr17 | 37009471 | 37010118 | RPL23      | ENSG00000125691 | -117  | 0.18 | 0.23 | 0.5  | -0.05  | NA |
| chr17 | 56296488 | 56296842 | MKS1       | ENSG00000011143 | -72   | 0.15 | 0.18 | 0.5  | -0.029 | NA |
| chr17 | 32905965 | 32908951 | C17orf102  | ENSG00000197322 | -1070 | 0.22 | 0.21 | 0.51 | 0.014  | NA |
| chr17 | 21454388 | 21454938 | C17orf51   | ENSG00000212719 | -128  | 0.36 | 0.3  | 0.52 | 0.056  | NA |
| chr17 | 36105334 | 36105583 | HNF1B      | ENSG00000108753 | -221  | 0.44 | 0.63 | 0.52 | -0.19  | NA |
| chr17 | 42295861 | 42299719 | UBTF       | ENSG00000108312 | -1920 | 0.23 | 0.24 | 0.52 | -0.013 | NA |
| chr17 | 43506828 | 43510380 | ARHGAP27   | ENSG00000159314 | -959  | 0.39 | 0.45 | 0.52 | -0.056 | NA |
| chr17 | 57784754 | 57785108 | PTRH2      | ENSG00000141378 | -141  | 0.23 | 0.28 | 0.52 | -0.055 | NA |
| chr17 | 74070404 | 74073530 | GALR2      | ENSG00000182687 | 1092  | 0.23 | 0.22 | 0.52 | 0.015  | NA |
| chr17 | 79804259 | 79804488 | P4HB       | ENSG00000185624 | 10    | 0.96 | 0.92 | 0.52 | 0.033  | NA |
| chr17 | 26698359 | 26699557 | SARM1      | ENSG00000004139 | -29   | 0.24 | 0.27 | 0.53 | -0.021 | NA |
| chr17 | 29035201 | 29037521 | SUZ12P     | ENSG00000247185 | -296  | 0.21 | 0.24 | 0.53 | -0.023 | NA |
| chr17 | 37761691 | 37763551 | NEUROD2    | ENSG00000171532 | 1575  | 0.2  | 0.22 | 0.53 | -0.021 | NA |
| chr17 | 42835776 | 42836242 | ADAM11     | ENSG00000073670 | -559  | 0.24 | 0.33 | 0.53 | -0.097 | NA |
| chr17 | 44928287 | 44929690 | WNT9B      | ENSG00000158955 | 36    | 0.21 | 0.19 | 0.53 | 0.015  | NA |
| chr17 | 56234321 | 56234827 | AC005962.1 | ENSG00000229590 | -235  | 0.22 | 0.36 | 0.53 | -0.14  | NA |
| chr17 | 61678154 | 61678678 | TACO1      | ENSG00000136463 | 185   | 0.19 | 0.22 | 0.53 | -0.03  | NA |
| chr17 | 66596072 | 66597578 | FAM20A     | ENSG00000108950 | 270   | 0.24 | 0.23 | 0.53 | 0.015  | NA |
| chr17 | 8022050  | 8022306  | ALOXE3     | ENSG00000179148 | 56    | 0.17 | 0.26 | 0.54 | -0.091 | NA |
| chr17 | 40306909 | 40307263 | RAB5C      | ENSG00000108774 | -104  | 0.22 | 0.29 | 0.54 | -0.065 | NA |
| chr17 | 48784561 | 48785331 | ANKRD40    | ENSG00000154945 | 70    | 0.17 | 0.19 | 0.54 | -0.024 | NA |

|       |          |          |            |                 |      |      |      |      |        |    |
|-------|----------|----------|------------|-----------------|------|------|------|------|--------|----|
| chr17 | 79283863 | 79284131 | C17orf55   | ENSG00000185168 | -949 | 0.95 | 0.93 | 0.54 | 0.025  | NA |
| chr17 | 79790530 | 79791553 | FAM195B    | ENSG00000225663 | 126  | 0.15 | 0.17 | 0.54 | -0.017 | NA |
| chr17 | 79818230 | 79819299 | P4HB       | ENSG00000185624 | -376 | 0.34 | 0.29 | 0.54 | 0.044  | NA |
| chr17 | 1419442  | 1420434  | INPP5K     | ENSG00000132376 | -50  | 0.2  | 0.18 | 0.55 | 0.021  | NA |
| chr17 | 21116850 | 21118031 | AC087294.2 | ENSG00000235530 | -231 | 0.17 | 0.18 | 0.55 | -0.018 | NA |
| chr17 | 39942175 | 39943176 | JUP        | ENSG00000173801 | -353 | 0.21 | 0.19 | 0.55 | 0.023  | NA |
| chr17 | 6679205  | 6679710  | FBXO39     | ENSG00000177294 | -94  | 0.25 | 0.22 | 0.56 | 0.035  | NA |
| chr17 | 26879239 | 26879787 | UNC119     | ENSG00000109103 | 65   | 0.17 | 0.19 | 0.56 | -0.021 | NA |
| chr17 | 35305758 | 35306757 | AATF       | ENSG00000108270 | 82   | 0.23 | 0.21 | 0.56 | 0.022  | NA |
| chr17 | 66286541 | 66288532 | SLC16A6    | ENSG00000108932 | -131 | 0.2  | 0.21 | 0.56 | -0.018 | NA |
| chr17 | 72931729 | 72932601 | OTOP3      | ENSG00000182938 | 268  | 0.18 | 0.2  | 0.56 | -0.022 | NA |
| chr17 | 1927051  | 1929408  | RTN4RL1    | ENSG00000185924 | -51  | 0.19 | 0.18 | 0.57 | 0.012  | NA |
| chr17 | 16520938 | 16521317 | AC005822.1 | ENSG00000235554 | 68   | 0.96 | 0.98 | 0.57 | -0.019 | NA |
| chr17 | 36981373 | 36981750 | CWC25      | ENSG00000108296 | 7    | 0.15 | 0.19 | 0.57 | -0.036 | NA |
| chr17 | 41476220 | 41476715 | ARL4D      | ENSG00000175906 | 114  | 0.16 | 0.2  | 0.57 | -0.042 | NA |
| chr17 | 41977922 | 41978130 | MPP2       | ENSG00000108852 | -60  | 0.24 | 0.3  | 0.57 | -0.057 | NA |
| chr17 | 42276291 | 42276738 | ATXN7L3    | ENSG00000087152 | 939  | 0.27 | 0.5  | 0.57 | -0.23  | NA |
| chr17 | 7145479  | 7146709  | GABARAP    | ENSG00000170296 | -322 | 0.21 | 0.23 | 0.58 | -0.023 | NA |
| chr17 | 18585239 | 18585829 | FOXO3B     | ENSG00000213688 | -17  | 0.13 | 0.11 | 0.58 | 0.029  | NA |
| chr17 | 77751378 | 77751673 | CBX2       | ENSG00000173894 | -452 | 0.23 | 0.26 | 0.58 | -0.035 | NA |
| chr17 | 78518750 | 78519083 | RPTOR      | ENSG00000141564 | 291  | 0.49 | 0.4  | 0.58 | 0.083  | NA |
| chr17 | 1551730  | 1553249  | RILP       | ENSG00000167705 | 863  | 0.19 | 0.21 | 0.59 | -0.015 | NA |
| chr17 | 29248847 | 29249926 | ADAP2      | ENSG00000184060 | 688  | 0.23 | 0.2  | 0.59 | 0.023  | NA |
| chr17 | 38599669 | 38600306 | IGFBP4     | ENSG00000141753 | 285  | 0.22 | 0.2  | 0.59 | 0.028  | NA |
| chr17 | 73201326 | 73202122 | NUP85      | ENSG00000125450 | 127  | 0.25 | 0.22 | 0.59 | 0.027  | NA |
| chr17 | 74496992 | 74497632 | RHBDF2     | ENSG00000129667 | 196  | 0.25 | 0.29 | 0.59 | -0.035 | NA |
| chr17 | 7117596  | 7118085  | DLG4       | ENSG00000132535 | -609 | 0.18 | 0.15 | 0.6  | 0.029  | NA |
| chr17 | 16283927 | 16284768 | UBB        | ENSG00000170315 | 234  | 0.25 | 0.33 | 0.6  | -0.086 | NA |
| chr17 | 17697710 | 17698063 | RAI1       | ENSG00000108557 | 1623 | 0.93 | 0.87 | 0.6  | 0.061  | NA |
| chr17 | 38083226 | 38084052 | ORMDL3     | ENSG00000172057 | 215  | 0.25 | 0.22 | 0.6  | 0.023  | NA |

|       |          |          |            |                 |      |      |      |      |        |    |
|-------|----------|----------|------------|-----------------|------|------|------|------|--------|----|
| chr17 | 40896658 | 40897234 | EZH1       | ENSG00000108799 | 125  | 0.19 | 0.24 | 0.6  | -0.046 | NA |
| chr17 | 42200521 | 42201543 | HDAC5      | ENSG00000108840 | -18  | 0.16 | 0.19 | 0.6  | -0.034 | NA |
| chr17 | 73042577 | 73043316 | ATP5H      | ENSG00000167863 | 128  | 0.26 | 0.2  | 0.6  | 0.055  | NA |
| chr17 | 76374443 | 76375201 | PGS1       | ENSG00000087157 | 87   | 0.2  | 0.22 | 0.6  | -0.026 | NA |
| chr17 | 27279335 | 27279669 | PHF12      | ENSG00000109118 | -713 | 0.26 | 0.19 | 0.61 | 0.07   | NA |
| chr17 | 42402787 | 42403266 | SLC25A39   | ENSG00000013306 | -788 | 0.2  | 0.22 | 0.61 | -0.028 | NA |
| chr17 | 3375006  | 3375237  | SPATA22    | ENSG00000141255 | -80  | 1    | 0.94 | 0.62 | 0.055  | NA |
| chr17 | 27506889 | 27507607 | MYO18A     | ENSG00000196535 | 134  | 0.18 | 0.16 | 0.62 | 0.023  | NA |
| chr17 | 43318429 | 43319243 | AC138150.4 | ENSG00000233175 | -272 | 0.24 | 0.22 | 0.62 | 0.027  | NA |
| chr17 | 47652789 | 47653078 | NXPH3      | ENSG00000182575 | -287 | 0.3  | 0.21 | 0.62 | 0.086  | NA |
| chr17 | 74099738 | 74100055 | EXOC7      | ENSG00000182473 | -123 | 0.22 | 0.26 | 0.62 | -0.043 | NA |
| chr17 | 7184024  | 7185687  | SLC2A4     | ENSG00000181856 | -198 | 0.2  | 0.19 | 0.63 | 0.016  | NA |
| chr17 | 15163930 | 15164810 | PMP22      | ENSG00000109099 | 1431 | 0.19 | 0.23 | 0.63 | -0.038 | NA |
| chr17 | 28804336 | 28804693 | GOSR1      | ENSG00000108587 | 88   | 0.26 | 0.21 | 0.63 | 0.047  | NA |
| chr17 | 42976710 | 42977118 | EFTUD2     | ENSG00000108883 | -85  | 0.12 | 0.25 | 0.63 | -0.13  | NA |
| chr17 | 53498243 | 53499546 | MMD        | ENSG00000108960 | 447  | 0.2  | 0.21 | 0.63 | -0.015 | NA |
| chr17 | 5019050  | 5019551  | USP6       | ENSG00000129204 | -433 | 0.34 | 0.31 | 0.64 | 0.025  | NA |
| chr17 | 58468980 | 58469903 | USP32      | ENSG00000170832 | -105 | 0.18 | 0.2  | 0.64 | -0.019 | NA |
| chr17 | 64831193 | 64831574 | CACNG5     | ENSG00000075429 | 148  | 0.14 | 0.16 | 0.64 | -0.021 | NA |
| chr17 | 79633256 | 79634230 | C17orf90   | ENSG00000204237 | -125 | 0.2  | 0.21 | 0.64 | -0.013 | NA |
| chr17 | 15686218 | 15686474 | IL6STP1    | ENSG00000227018 | -256 | 0.14 | 0.1  | 0.65 | 0.037  | NA |
| chr17 | 41984148 | 41985012 | MPP2       | ENSG00000108852 | 21   | 0.22 | 0.25 | 0.65 | -0.024 | NA |
| chr17 | 48226223 | 48228625 | PPP1R9B    | ENSG00000108819 | 453  | 0.2  | 0.19 | 0.65 | 0.013  | NA |
| chr17 | 56160754 | 56161494 | DYNLL2     | ENSG00000121083 | 344  | 0.18 | 0.16 | 0.65 | 0.023  | NA |
| chr17 | 881733   | 883381   | NXN        | ENSG00000167693 | 453  | 0.19 | 0.21 | 0.66 | -0.017 | NA |
| chr17 | 3539318  | 3540484  | SHPK       | ENSG00000197417 | -285 | 0.19 | 0.21 | 0.66 | -0.015 | NA |
| chr17 | 7517690  | 7518748  | FXR2       | ENSG00000129245 | -4   | 0.24 | 0.21 | 0.66 | 0.027  | NA |
| chr17 | 7608376  | 7608956  | EFNB3      | ENSG00000108947 | 146  | 0.25 | 0.22 | 0.66 | 0.026  | NA |
| chr17 | 19483305 | 19483687 | AC025627.7 | ENSG00000228983 | -24  | 0.18 | 0.2  | 0.66 | -0.026 | NA |
| chr17 | 27229475 | 27230178 | DHRS13     | ENSG00000167536 | 157  | 0.18 | 0.16 | 0.66 | 0.019  | NA |

|       |          |          |           |                 |      |      |      |      |        |    |
|-------|----------|----------|-----------|-----------------|------|------|------|------|--------|----|
| chr17 | 40610746 | 40611032 | ATP6V0A1  | ENSG00000033627 | 27   | 0.24 | 0.19 | 0.66 | 0.046  | NA |
| chr17 | 61553834 | 61555063 | ACE       | ENSG00000159640 | 26   | 0.18 | 0.17 | 0.66 | 0.013  | NA |
| chr17 | 73285180 | 73285854 | SLC25A19  | ENSG00000125454 | -3   | 0.16 | 0.14 | 0.66 | 0.018  | NA |
| chr17 | 13503829 | 13505559 | HS3ST3A1  | ENSG00000153976 | 550  | 0.2  | 0.19 | 0.67 | 0.0099 | NA |
| chr17 | 36452840 | 36453141 | MRPL45    | ENSG00000174100 | 0    | 0.43 | 0.35 | 0.67 | 0.08   | NA |
| chr17 | 15847757 | 15849513 | ADORA2B   | ENSG00000170425 | 404  | 0.24 | 0.25 | 0.68 | -0.013 | NA |
| chr17 | 33905502 | 33905726 | PEX12     | ENSG00000108733 | -40  | 0.23 | 0.19 | 0.68 | 0.038  | NA |
| chr17 | 40834791 | 40835098 | CNTNAP1   | ENSG00000108797 | 312  | 0.29 | 0.36 | 0.68 | -0.071 | NA |
| chr17 | 56595080 | 56595619 | MTMR4     | ENSG00000108389 | -98  | 0.21 | 0.14 | 0.68 | 0.068  | NA |
| chr17 | 78009076 | 78011084 | TBC1D16   | ENSG00000167291 | -433 | 0.2  | 0.21 | 0.68 | -0.012 | NA |
| chr17 | 29718230 | 29719291 | RAB11FIP4 | ENSG00000131242 | 118  | 0.17 | 0.16 | 0.69 | 0.013  | NA |
| chr17 | 40427951 | 40429036 | STAT5B    | ENSG00000173757 | -69  | 0.19 | 0.18 | 0.69 | 0.015  | NA |
| chr17 | 56064830 | 56066051 | VEZF1     | ENSG00000136451 | 175  | 0.26 | 0.28 | 0.69 | -0.026 | NA |
| chr17 | 56083750 | 56085373 | SRSF1     | ENSG00000136450 | 146  | 0.21 | 0.24 | 0.69 | -0.033 | NA |
| chr17 | 73662999 | 73663628 | RECQL5    | ENSG00000108469 | -52  | 0.27 | 0.25 | 0.69 | 0.024  | NA |
| chr17 | 26732812 | 26733396 | SLC46A1   | ENSG00000076351 | 124  | 0.15 | 0.18 | 0.7  | -0.029 | NA |
| chr17 | 27915718 | 27916957 | GIT1      | ENSG00000108262 | 230  | 0.23 | 0.24 | 0.7  | -0.016 | NA |
| chr17 | 33288174 | 33288913 | CCT6B     | ENSG00000132141 | -126 | 0.23 | 0.29 | 0.7  | -0.058 | NA |
| chr17 | 37025737 | 37027104 | LASP1     | ENSG00000002834 | 164  | 0.25 | 0.27 | 0.7  | -0.021 | NA |
| chr17 | 37307498 | 37307775 | PLXDC1    | ENSG00000161381 | 232  | 0.14 | 0.16 | 0.7  | -0.025 | NA |
| chr17 | 40932329 | 40933299 | WNK4      | ENSG00000126562 | 165  | 0.23 | 0.22 | 0.7  | 0.014  | NA |
| chr17 | 74706465 | 74707067 | MXRA7     | ENSG00000182534 | 290  | 0.21 | 0.19 | 0.7  | 0.024  | NA |
| chr17 | 78449507 | 78452783 | NPTX1     | ENSG00000171246 | -741 | 0.22 | 0.21 | 0.7  | 0.0084 | NA |
| chr17 | 79518816 | 79519844 | C17orf70  | ENSG00000185504 | 72   | 0.24 | 0.23 | 0.7  | 0.013  | NA |
| chr17 | 74448388 | 74449424 | UBE2O     | ENSG00000175931 | 382  | 0.27 | 0.25 | 0.71 | 0.016  | NA |
| chr17 | 4981357  | 4981979  | ZFP3      | ENSG00000180787 | -86  | 0.17 | 0.19 | 0.71 | -0.016 | NA |
| chr17 | 42580377 | 42581046 | GPATCH8   | ENSG00000186566 | 58   | 0.17 | 0.19 | 0.71 | -0.021 | NA |
| chr17 | 71188407 | 71189458 | COG1      | ENSG00000166685 | 161  | 0.18 | 0.17 | 0.71 | 0.012  | NA |
| chr17 | 71228060 | 71229074 | C17orf80  | ENSG00000141219 | 195  | 0.21 | 0.23 | 0.71 | -0.022 | NA |
| chr17 | 73892496 | 73893448 | TRIM65    | ENSG00000141569 | -333 | 0.19 | 0.2  | 0.71 | -0.013 | NA |

|       |          |          |            |                 |      |      |      |      |         |    |
|-------|----------|----------|------------|-----------------|------|------|------|------|---------|----|
| chr17 | 1358888  | 1359814  | CRK        | ENSG00000167193 | 166  | 0.19 | 0.21 | 0.72 | -0.013  | NA |
| chr17 | 74378848 | 74382513 | PRPSAP1    | ENSG00000161542 | -115 | 0.24 | 0.24 | 0.72 | -0.0077 | NA |
| chr17 | 1395119  | 1395372  | MYO1C      | ENSG00000197879 | -273 | 0.24 | 0.3  | 0.73 | -0.055  | NA |
| chr17 | 8079490  | 8080125  | TMEM107    | ENSG00000179029 | -203 | 0.18 | 0.16 | 0.73 | 0.017   | NA |
| chr17 | 8198440  | 8199170  | SLC25A35   | ENSG00000125434 | -144 | 0.21 | 0.23 | 0.73 | -0.018  | NA |
| chr17 | 38347533 | 38347765 | RAPGEFL1   | ENSG00000108352 | -73  | 0.14 | 0.19 | 0.73 | -0.046  | NA |
| chr17 | 43138229 | 43138857 | DCAKD      | ENSG00000172992 | -70  | 0.24 | 0.26 | 0.73 | -0.018  | NA |
| chr17 | 54910496 | 54912470 | C17orf67   | ENSG00000214226 | -226 | 0.21 | 0.22 | 0.73 | -0.0099 | NA |
| chr17 | 67322709 | 67323837 | ABCA5      | ENSG00000154265 | 50   | 0.16 | 0.24 | 0.73 | -0.074  | NA |
| chr17 | 78965416 | 78966484 | CHMP6      | ENSG00000176108 | 309  | 0.26 | 0.24 | 0.73 | 0.014   | NA |
| chr17 | 4642038  | 4643410  | CXCL16     | ENSG00000161921 | 499  | 0.24 | 0.22 | 0.74 | 0.012   | NA |
| chr17 | 21279506 | 21281574 | KCNJ12     | ENSG00000184185 | 841  | 0.25 | 0.24 | 0.74 | 0.014   | NA |
| chr17 | 40171931 | 40172281 | NKIRAS2    | ENSG00000168256 | 19   | 0.26 | 0.21 | 0.74 | 0.056   | NA |
| chr17 | 43044369 | 43046424 | C1QL1      | ENSG00000131094 | 248  | 0.22 | 0.21 | 0.74 | 0.0094  | NA |
| chr17 | 49230686 | 49231247 | NME1       | ENSG00000239672 | 69   | 0.23 | 0.25 | 0.74 | -0.017  | NA |
| chr17 | 65989896 | 65990097 | C17orf58   | ENSG00000186665 | -231 | 0.54 | 0.43 | 0.74 | 0.11    | NA |
| chr17 | 80251357 | 80251673 | AC132872.2 | ENSG00000244773 | -825 | 0.67 | 0.25 | 0.74 | 0.42    | NA |
| chr17 | 8126224  | 8126486  | NCRNA00324 | ENSG00000178977 | 1006 | 0.22 | 0.25 | 0.75 | -0.028  | NA |
| chr17 | 21030056 | 21030814 | DHRS7B     | ENSG00000109016 | 177  | 0.2  | 0.18 | 0.75 | 0.015   | NA |
| chr17 | 43209347 | 43210746 | PLCD3      | ENSG00000161714 | -181 | 0.24 | 0.23 | 0.75 | 0.01    | NA |
| chr17 | 48422989 | 48423564 | XYLT2      | ENSG00000015532 | -177 | 0.18 | 0.17 | 0.75 | 0.013   | NA |
| chr17 | 61776890 | 61778733 | LIMD2      | ENSG00000136490 | -292 | 0.15 | 0.15 | 0.75 | -0.0062 | NA |
| chr17 | 62339803 | 62340799 | TEX2       | ENSG00000136478 | 352  | 0.22 | 0.2  | 0.75 | 0.018   | NA |
| chr17 | 79196345 | 79197419 | AZI1       | ENSG00000141577 | -131 | 0.14 | 0.15 | 0.75 | -0.011  | NA |
| chr17 | 7788261  | 7789091  | CHD3       | ENSG00000170004 | 552  | 0.24 | 0.26 | 0.76 | -0.021  | NA |
| chr17 | 40705176 | 40706983 | HSD17B1    | ENSG00000108786 | 1138 | 0.56 | 0.54 | 0.76 | 0.014   | NA |
| chr17 | 62971515 | 62972293 | AMZ2P1     | ENSG00000214174 | -218 | 0.26 | 0.28 | 0.76 | -0.025  | NA |
| chr17 | 63555902 | 63557362 | AXIN2      | ENSG00000168646 | 1133 | 0.25 | 0.24 | 0.76 | 0.011   | NA |
| chr17 | 77005746 | 77006106 | CANT1      | ENSG00000171302 | -66  | 0.17 | 0.15 | 0.76 | 0.023   | NA |
| chr17 | 15689697 | 15690227 | MEIS3P1    | ENSG00000179277 | 30   | 0.17 | 0.2  | 0.77 | -0.032  | NA |



|       |          |          |            |                 |      |      |      |      |         |    |
|-------|----------|----------|------------|-----------------|------|------|------|------|---------|----|
| chr17 | 30263761 | 30264515 | SUZ12      | ENSG00000178691 | 82   | 0.19 | 0.22 | 0.77 | -0.033  | NA |
| chr17 | 45928211 | 45928710 | SP6        | ENSG00000189120 | 99   | 0.15 | 0.16 | 0.77 | -0.014  | NA |
| chr17 | 79880449 | 79880872 | MAFG       | ENSG00000197063 | 748  | 0.91 | 0.93 | 0.77 | -0.017  | NA |
| chr17 | 80291020 | 80292394 | SECTM1     | ENSG00000141574 | 214  | 0.35 | 0.33 | 0.77 | 0.013   | NA |
| chr17 | 655026   | 656707   | GEMIN4     | ENSG00000179409 | -452 | 0.22 | 0.23 | 0.78 | -0.0095 | NA |
| chr17 | 57408787 | 57410145 | YPEL2      | ENSG00000175155 | 413  | 0.19 | 0.18 | 0.78 | 0.0076  | NA |
| chr17 | 48624415 | 48624723 | SPATA20    | ENSG00000006282 | 119  | 0.21 | 0.19 | 0.78 | 0.022   | NA |
| chr17 | 27169526 | 27169894 | C17orf63   | ENSG00000173065 | 131  | 0.32 | 0.27 | 0.79 | 0.045   | NA |
| chr17 | 39889956 | 39891489 | HAP1       | ENSG00000173805 | 174  | 0.18 | 0.17 | 0.79 | 0.0094  | NA |
| chr17 | 40335946 | 40336609 | HCRT       | ENSG00000161610 | 1193 | 0.18 | 0.16 | 0.79 | 0.015   | NA |
| chr17 | 41176670 | 41176966 | RND2       | ENSG00000108830 | -440 | 0.23 | 0.19 | 0.79 | 0.046   | NA |
| chr17 | 57231855 | 57232655 | SKA2       | ENSG00000182628 | 545  | 0.31 | 0.33 | 0.79 | -0.017  | NA |
| chr17 | 9548389  | 9549616  | USP43      | ENSG00000154914 | 52   | 0.22 | 0.21 | 0.8  | 0.012   | NA |
| chr17 | 38020381 | 38020645 | IKZF3      | ENSG00000161405 | -72  | 0.2  | 0.17 | 0.8  | 0.025   | NA |
| chr17 | 42385810 | 42386393 | RUNDC3A    | ENSG00000108309 | 158  | 0.35 | 0.31 | 0.8  | 0.04    | NA |
| chr17 | 46894293 | 46894809 | TTLL6      | ENSG00000170703 | -136 | 0.21 | 0.24 | 0.8  | -0.027  | NA |
| chr17 | 52977866 | 52978307 | TOM1L1     | ENSG00000141198 | 34   | 0.23 | 0.21 | 0.8  | 0.021   | NA |
| chr17 | 54670780 | 54672347 | NOG        | ENSG00000183691 | 503  | 0.19 | 0.18 | 0.8  | 0.0096  | NA |
| chr17 | 80231019 | 80231820 | CSNK1D     | ENSG00000141551 | -112 | 0.17 | 0.18 | 0.8  | -0.01   | NA |
| chr17 | 17380175 | 17380416 | MED9       | ENSG00000141026 | -5   | 0.13 | 0.16 | 0.81 | -0.034  | NA |
| chr17 | 38277760 | 38279504 | MSL1       | ENSG00000188895 | -158 | 0.19 | 0.19 | 0.81 | 0.0065  | NA |
| chr17 | 39992021 | 39992627 | NT5C3L     | ENSG00000141698 | 125  | 0.2  | 0.19 | 0.81 | 0.013   | NA |
| chr17 | 44270337 | 44271499 | AC217773.1 | ENSG00000214401 | -21  | 0.22 | 0.11 | 0.81 | 0.11    | NA |
| chr17 | 48556004 | 48556509 | RSAD1      | ENSG00000136444 | 95   | 0.19 | 0.21 | 0.81 | -0.022  | NA |
| chr17 | 3867059  | 3868095  | ATP2A3     | ENSG00000074370 | 159  | 0.23 | 0.22 | 0.82 | 0.0076  | NA |
| chr17 | 33307352 | 33308246 | LIG3       | ENSG00000005156 | 257  | 0.23 | 0.22 | 0.82 | 0.013   | NA |
| chr17 | 4870189  | 4871710  | SPAG7      | ENSG00000091640 | 183  | 0.21 | 0.22 | 0.83 | -0.0099 | NA |
| chr17 | 17494598 | 17495505 | PEMT       | ENSG00000133027 | -87  | 0.16 | 0.17 | 0.83 | -0.01   | NA |
| chr17 | 42462135 | 42463579 | ITGA2B     | ENSG00000005961 | -169 | 0.47 | 0.5  | 0.83 | -0.03   | NA |
| chr17 | 78977613 | 78978447 | AC127496.2 | ENSG00000222167 | -22  | 0.24 | 0.25 | 0.83 | -0.02   | NA |

|       |          |          |            |                 |       |      |      |      |         |    |
|-------|----------|----------|------------|-----------------|-------|------|------|------|---------|----|
| chr17 | 1394439  | 1394813  | MYO1C      | ENSG00000197879 | 346   | 0.18 | 0.17 | 0.84 | 0.015   | NA |
| chr17 | 6917569  | 6918539  | AC040977.1 | ENSG00000258315 | 240   | 0.23 | 0.22 | 0.84 | 0.0098  | NA |
| chr17 | 36507657 | 36508939 | SOCS7      | ENSG00000174111 | 293   | 0.2  | 0.19 | 0.84 | 0.0088  | NA |
| chr17 | 73511016 | 73513176 | CASKIN2    | ENSG00000177303 | -469  | 0.23 | 0.24 | 0.84 | -0.0076 | NA |
| chr17 | 76210129 | 76210627 | BIRC5      | ENSG00000089685 | 101   | 0.16 | 0.14 | 0.84 | 0.028   | NA |
| chr17 | 76920684 | 76921961 | TIMP2      | ENSG00000035862 | 147   | 0.22 | 0.21 | 0.84 | 0.0091  | NA |
| chr17 | 4606984  | 4607722  | AC091153.1 | ENSG00000141456 | 66    | 0.2  | 0.21 | 0.85 | -0.0085 | NA |
| chr17 | 5014705  | 5015356  | ZNF232     | ENSG00000167840 | 141   | 0.28 | 0.26 | 0.85 | 0.02    | NA |
| chr17 | 6347465  | 6348111  | FAM64A     | ENSG00000129195 | 27    | 0.25 | 0.26 | 0.85 | -0.01   | NA |
| chr17 | 8065909  | 8066494  | VAMP2      | ENSG00000220205 | 49    | 0.23 | 0.21 | 0.85 | 0.016   | NA |
| chr17 | 32909007 | 32909293 | TMEM132E   | ENSG00000181291 | 1208  | 0.21 | 0.17 | 0.85 | 0.048   | NA |
| chr17 | 34257646 | 34257848 | RDM1       | ENSG00000187456 | -3    | 0.25 | 0.15 | 0.85 | 0.096   | NA |
| chr17 | 40718686 | 40719633 | MLX        | ENSG00000108788 | 81    | 0.19 | 0.19 | 0.85 | 0.0082  | NA |
| chr17 | 57287355 | 57287792 | C17orf71   | ENSG00000167447 | 202   | 0.28 | 0.25 | 0.85 | 0.022   | NA |
| chr17 | 65362343 | 65362837 | PSMD12     | ENSG00000197170 | 131   | 0.18 | 0.16 | 0.85 | 0.019   | NA |
| chr17 | 11923951 | 11924871 | MAP2K4     | ENSG00000065559 | 276   | 0.25 | 0.27 | 0.86 | -0.021  | NA |
| chr17 | 17286964 | 17287372 | AC073621.1 | ENSG00000215030 | 158   | 0.98 | 0.97 | 0.86 | 0.0081  | NA |
| chr17 | 41477270 | 41477482 | ARL4D      | ENSG00000175906 | 1023  | 0.64 | 0.62 | 0.86 | 0.019   | NA |
| chr17 | 57696654 | 57697280 | CLTC       | ENSG00000141367 | -252  | 0.24 | 0.26 | 0.86 | -0.02   | NA |
| chr17 | 57970011 | 57971021 | TUBD1      | ENSG00000108423 | -297  | 0.21 | 0.19 | 0.86 | 0.021   | NA |
| chr17 | 66243583 | 66244403 | AMZ2       | ENSG00000196704 | -152  | 0.18 | 0.19 | 0.86 | -0.0075 | NA |
| chr17 | 49337102 | 49338583 | MBTD1      | ENSG00000011258 | -540  | 0.28 | 0.29 | 0.87 | -0.011  | NA |
| chr17 | 65713768 | 65714268 | NOL11      | ENSG00000130935 | -43   | 0.21 | 0.2  | 0.87 | 0.013   | NA |
| chr17 | 72321948 | 72322461 | KIF19      | ENSG00000196169 | -145  | 0.21 | 0.19 | 0.87 | 0.021   | NA |
| chr17 | 37886455 | 37887010 | C17orf37   | ENSG00000141741 | -78   | 0.3  | 0.32 | 0.88 | -0.018  | NA |
| chr17 | 40827975 | 40828659 | PLEKHH3    | ENSG00000068137 | -209  | 0.24 | 0.26 | 0.88 | -0.018  | NA |
| chr17 | 7452150  | 7452645  | TNFSF12    | ENSG00000239697 | 189   | 0.18 | 0.19 | 0.89 | -0.011  | NA |
| chr17 | 37774076 | 37774591 | AC087491.2 | ENSG00000214546 | -1533 | 0.24 | 0.23 | 0.89 | 0.0096  | NA |
| chr17 | 62832769 | 62833528 | AC103810.1 | ENSG00000214176 | 95    | 0.13 | 0.16 | 0.89 | -0.037  | NA |
| chr17 | 73900526 | 73901353 | MRPL38     | ENSG00000204316 | -20   | 0.24 | 0.23 | 0.89 | 0.01    | NA |

|       |          |          |               |                 |       |      |      |      |         |    |
|-------|----------|----------|---------------|-----------------|-------|------|------|------|---------|----|
| chr17 | 1465159  | 1466312  | PITPNA        | ENSG00000174238 | 375   | 0.2  | 0.2  | 0.9  | -0.005  | NA |
| chr17 | 7296504  | 7298466  | PLSCR3        | ENSG00000187838 | 347   | 0.51 | 0.5  | 0.9  | 0.0061  | NA |
| chr17 | 30669000 | 30669287 | C17orf75      | ENSG00000108666 | 46    | 0.19 | 0.21 | 0.9  | -0.021  | NA |
| chr17 | 30677001 | 30677460 | MIR632        | ENSG00000207928 | 102   | 0.36 | 0.44 | 0.9  | -0.086  | NA |
| chr17 | 79980199 | 79981548 | STRA13        | ENSG00000169689 | -79   | 0.22 | 0.23 | 0.9  | -0.0075 | NA |
| chr17 | 18575709 | 18576477 | AC026271.4    | ENSG00000240445 | 146   | 0.97 | 0.96 | 0.91 | 0.0087  | NA |
| chr17 | 41856470 | 41856687 | DUSP3         | ENSG00000108861 | -210  | 0.13 | 0.15 | 0.91 | -0.019  | NA |
| chr17 | 46673532 | 46674181 | RP11-357H14.7 | ENSG00000233101 | 55    | 0.24 | 0.23 | 0.91 | 0.013   | NA |
| chr17 | 80401644 | 80401858 | C17orf62      | ENSG00000178927 | 1311  | 0.92 | 0.83 | 0.91 | 0.083   | NA |
| chr17 | 47840834 | 47841377 | FAM117A       | ENSG00000121104 | 388   | 0.35 | 0.33 | 0.92 | 0.021   | NA |
| chr17 | 7253298  | 7253764  | KCTD11        | ENSG00000213859 | -1677 | 0.21 | 0.23 | 0.92 | -0.014  | NA |
| chr17 | 20059028 | 20060060 | SPECC1        | ENSG00000128487 | 226   | 0.19 | 0.18 | 0.92 | 0.0064  | NA |
| chr17 | 31618345 | 31620465 | ACCN1         | ENSG00000108684 | -946  | 0.22 | 0.22 | 0.92 | -0.0038 | NA |
| chr17 | 33569141 | 33570527 | AC022916.1    | ENSG00000247843 | -488  | 0.28 | 0.27 | 0.92 | 0.0065  | NA |
| chr17 | 45918094 | 45918774 | SCRN2         | ENSG00000141295 | 265   | 0.18 | 0.17 | 0.92 | 0.0098  | NA |
| chr17 | 48238772 | 48239073 | RP11-893F2.13 | ENSG00000253730 | -285  | 0.12 | 0.14 | 0.92 | -0.016  | NA |
| chr17 | 74349151 | 74350656 | PRPSAP1       | ENSG00000161542 | -370  | 0.22 | 0.22 | 0.92 | 0.0083  | NA |
| chr17 | 7835171  | 7835569  | TRAPPC1       | ENSG00000170043 | -104  | 0.2  | 0.21 | 0.93 | -0.007  | NA |
| chr17 | 46655215 | 46655604 | MIR10A        | ENSG00000207777 | 1900  | 0.18 | 0.2  | 0.93 | -0.016  | NA |
| chr17 | 71639028 | 71641670 | SDK2          | ENSG00000069188 | -122  | 0.24 | 0.25 | 0.93 | -0.0051 | NA |
| chr17 | 74553220 | 74553912 | AC090699.1    | ENSG00000163597 | -286  | 0.6  | 0.62 | 0.93 | -0.013  | NA |
| chr17 | 81036330 | 81039407 | METRNL        | ENSG00000176845 | 301   | 0.23 | 0.22 | 0.93 | 0.003   | NA |
| chr17 | 27070538 | 27071570 | TRAF4         | ENSG00000076604 | 18    | 0.19 | 0.19 | 0.94 | 0.0052  | NA |
| chr17 | 64961007 | 64962321 | CACNG4        | ENSG00000075461 | 651   | 0.25 | 0.26 | 0.94 | -0.0046 | NA |
| chr17 | 7589290  | 7589503  | WRAP53        | ENSG00000141499 | 7     | 0.45 | 0.43 | 0.95 | 0.016   | NA |
| chr17 | 27044168 | 27045049 | RAB34         | ENSG00000109113 | 117   | 0.22 | 0.22 | 0.95 | 0.0035  | NA |
| chr17 | 38474197 | 38474980 | RARA          | ENSG00000131759 | 115   | 0.26 | 0.25 | 0.96 | 0.007   | NA |
| chr17 | 47022062 | 47022344 | SNF8          | ENSG00000159210 | -133  | 0.11 | 0.14 | 0.96 | -0.035  | NA |
| chr17 | 73105229 | 73106667 | ARMC7         | ENSG00000125449 | -134  | 0.29 | 0.27 | 0.96 | 0.012   | NA |
| chr17 | 6616422  | 6617471  | SLC13A5       | ENSG00000141485 | -261  | 0.29 | 0.28 | 0.97 | 0.0067  | NA |

|       |          |          |                |                 |       |      |      |      |         |    |
|-------|----------|----------|----------------|-----------------|-------|------|------|------|---------|----|
| chr17 | 29158878 | 29159423 | ATAD5          | ENSG00000176208 | 162   | 0.23 | 0.24 | 0.97 | -0.0062 | NA |
| chr17 | 53342198 | 53343061 | HLF            | ENSG00000108924 | 308   | 0.2  | 0.19 | 0.97 | 0.0087  | NA |
| chr17 | 60004889 | 60005416 | INTS2          | ENSG00000108506 | 225   | 0.26 | 0.25 | 0.97 | 0.009   | NA |
| chr17 | 80008514 | 80010567 | RFNG           | ENSG00000169733 | 110   | 0.2  | 0.2  | 0.97 | -0.0024 | NA |
| chr17 | 80693067 | 80693729 | FN3K           | ENSG00000167363 | -54   | 0.24 | 0.26 | 0.97 | -0.011  | NA |
| chr17 | 18086258 | 18088360 | ALKBH5         | ENSG00000091542 | 917   | 0.23 | 0.23 | 0.98 | 0.002   | NA |
| chr17 | 7232330  | 7233151  | NEURL4         | ENSG00000215041 | -109  | 0.21 | 0.21 | 0.98 | 0.0037  | NA |
| chr17 | 8054550  | 8055835  | PER1           | ENSG00000179094 | 561   | 0.21 | 0.21 | 0.98 | -0.0044 | NA |
| chr17 | 18128577 | 18128821 | LLGL1          | ENSG00000131899 | -202  | 0.14 | 0.15 | 0.98 | -0.011  | NA |
| chr17 | 26732175 | 26732391 | SLC46A1        | ENSG00000076351 | 945   | 0.36 | 0.5  | 0.98 | -0.14   | NA |
| chr17 | 29233259 | 29233538 | C17orf42       | ENSG00000172171 | -112  | 0.3  | 0.29 | 0.98 | 0.0074  | NA |
| chr17 | 48074050 | 48074614 | RP11-1094H24.3 | ENSG00000248172 | 79    | 0.27 | 0.28 | 0.98 | -0.015  | NA |
| chr17 | 49243620 | 49244647 | NME1-NME2      | ENSG00000243678 | 494   | 0.2  | 0.19 | 0.98 | 0.0019  | NA |
| chr17 | 73401217 | 73401988 | GRB2           | ENSG00000177885 | -35   | 0.23 | 0.23 | 0.98 | 0.0037  | NA |
| chr17 | 39844833 | 39845950 | EIF1           | ENSG00000173812 | 254   | 0.21 | 0.21 | 1    | -0.0021 | NA |
| chr17 | 981508   | 981748   | ABR            | ENSG00000159842 | 613   | 0.89 | 0.95 | 1    | -0.063  | NA |
| chr17 | 1531110  | 1533229  | SLC43A2        | ENSG00000167703 | -39   | 0.18 | 0.18 | 1    | -0.001  | NA |
| chr17 | 7123038  | 7123718  | DLG4           | ENSG00000132535 | -321  | 0.22 | 0.23 | 1    | -0.005  | NA |
| chr17 | 7154424  | 7156126  | CTDNBP1        | ENSG00000175826 | 5     | 0.26 | 0.27 | 1    | -0.008  | NA |
| chr17 | 7387280  | 7388326  | ZBTB4          | ENSG00000174282 | -286  | 0.25 | 0.25 | 1    | 0.0016  | NA |
| chr17 | 7530705  | 7531251  | SAT2           | ENSG00000141504 | 209   | 0.23 | 0.22 | 1    | 0.0024  | NA |
| chr17 | 8113632  | 8113966  | AURKB          | ENSG00000178999 | 100   | 0.16 | 0.17 | 1    | -0.0042 | NA |
| chr17 | 8649003  | 8649513  | CCDC42         | ENSG00000161973 | -1104 | 0.23 | 0.23 | 1    | 0.0036  | NA |
| chr17 | 15607552 | 15608399 | AC005324.4     | ENSG00000233966 | 239   | 0.99 | 0.99 | 1    | 0.0022  | NA |
| chr17 | 16342504 | 16342897 | NCRNA00188     | ENSG00000175061 | 65    | 0.14 | 0.13 | 1    | 0.0094  | NA |
| chr17 | 17061857 | 17062186 | MPRIIP         | ENSG00000133030 | 210   | 0.96 | 0.94 | 1    | 0.014   | NA |
| chr17 | 17910139 | 17910468 | LRRC48         | ENSG00000171962 | 109   | 0.88 | 0.87 | 1    | 0.0058  | NA |
| chr17 | 17942198 | 17943495 | ATPAF2         | ENSG00000171953 | -457  | 0.17 | 0.17 | 1    | -0.0026 | NA |
| chr17 | 18161711 | 18162316 | FLII           | ENSG00000177731 | -2    | 0.18 | 0.17 | 1    | 0.0026  | NA |
| chr17 | 18476039 | 18476323 | AC107983.4     | ENSG00000227077 | 136   | 1    | 1    | 1    | 0       | NA |

|       |          |          |                |                 |       |      |      |   |         |    |
|-------|----------|----------|----------------|-----------------|-------|------|------|---|---------|----|
| chr17 | 19551344 | 19552483 | ALDH3A2        | ENSG00000072210 | 454   | 0.21 | 0.21 | 1 | 0.00073 | NA |
| chr17 | 20687569 | 20687913 | SCDP1          | ENSG00000226549 | -217  | 0.41 | 0.41 | 1 | -0.0044 | NA |
| chr17 | 27406753 | 27408059 | MYO18A         | ENSG00000196535 | -612  | 0.95 | 0.95 | 1 | -0.0021 | NA |
| chr17 | 27621169 | 27621455 | NUFIP2         | ENSG00000108256 | -146  | 0.21 | 0.23 | 1 | -0.016  | NA |
| chr17 | 27899511 | 27900067 | TP53I13        | ENSG00000167543 | 449   | 0.2  | 0.21 | 1 | -0.0023 | NA |
| chr17 | 28903507 | 28903832 | LRRRC37BP1     | ENSG00000214719 | 143   | 0.95 | 1    | 1 | -0.045  | NA |
| chr17 | 33894866 | 33895142 | RP11-1094M14.1 | ENSG00000242660 | 1468  | 0.14 | 0.13 | 1 | 0.0062  | NA |
| chr17 | 34058549 | 34058778 | RASL10B        | ENSG00000141150 | -16   | 0.42 | 0.5  | 1 | -0.079  | NA |
| chr17 | 36908107 | 36908510 | PSMB3          | ENSG00000108294 | -695  | 0.24 | 0.26 | 1 | -0.022  | NA |
| chr17 | 36908662 | 36909577 | PSMB3          | ENSG00000108294 | 116   | 0.14 | 0.14 | 1 | 0.0014  | NA |
| chr17 | 37321482 | 37322099 | ARL5C          | ENSG00000141748 | 624   | 0.28 | 0.28 | 1 | -0.0003 | NA |
| chr17 | 37844112 | 37844481 | PGAP3          | ENSG00000161395 | 14    | 0.17 | 0.16 | 1 | 0.0036  | NA |
| chr17 | 38375440 | 38375836 | WIPF2          | ENSG00000171475 | 64    | 0.24 | 0.24 | 1 | 0.0037  | NA |
| chr17 | 38573716 | 38574243 | TOP2A          | ENSG00000131747 | 190   | 0.18 | 0.18 | 1 | -0.0014 | NA |
| chr17 | 40168999 | 40169694 | NKIRAS2        | ENSG00000168256 | 308   | 0.21 | 0.2  | 1 | 0.0035  | NA |
| chr17 | 40811232 | 40811597 | TUBG2          | ENSG00000037042 | 148   | 0.18 | 0.18 | 1 | -0.0006 | NA |
| chr17 | 40937258 | 40937480 | WNK4           | ENSG00000126562 | 24    | 0.21 | 0.21 | 1 | 0.00078 | NA |
| chr17 | 40950474 | 40950902 | CCDC56         | ENSG00000183978 | 16    | 0.25 | 0.24 | 1 | 0.0034  | NA |
| chr17 | 41132462 | 41133367 | AARSD1         | ENSG00000108825 | -407  | 0.17 | 0.17 | 1 | 0.0016  | NA |
| chr17 | 41322972 | 41323363 | NBR1           | ENSG00000188554 | -52   | 0.19 | 0.25 | 1 | -0.064  | NA |
| chr17 | 41446166 | 41446547 | AC087650.2     | ENSG00000243582 | -906  | 0.18 | 0.19 | 1 | -0.0094 | NA |
| chr17 | 42147925 | 42148501 | G6PC3          | ENSG00000141349 | 115   | 0.23 | 0.23 | 1 | -0.0031 | NA |
| chr17 | 43128789 | 43129038 | DCAKD          | ENSG00000172992 | 65    | 0.12 | 0.11 | 1 | 0.011   | NA |
| chr17 | 43697922 | 43698336 | AC126544.1     | ENSG00000204650 | 153   | 0.2  | 0.18 | 1 | 0.023   | NA |
| chr17 | 45177258 | 45177755 | AC068152.2     | ENSG00000246634 | 121   | 0.24 | 0.21 | 1 | 0.025   | NA |
| chr17 | 45569833 | 45570134 | MRPL45P2       | ENSG00000228782 | -134  | 0.22 | 0.33 | 1 | -0.11   | NA |
| chr17 | 45810589 | 45811388 | TBX21          | ENSG00000073861 | 378   | 0.25 | 0.25 | 1 | -0.0023 | NA |
| chr17 | 47307740 | 47308276 | PHOSPHO1       | ENSG00000173868 | -118  | 0.16 | 0.16 | 1 | -0.0021 | NA |
| chr17 | 48350422 | 48350832 | TMEM92         | ENSG00000167105 | -1161 | 0.16 | 0.16 | 1 | 0.0022  | NA |
| chr17 | 48450456 | 48450665 | MRPL27         | ENSG00000108826 | -24   | 0.18 | 0.19 | 1 | -0.013  | NA |

|       |          |          |              |                 |       |      |      |   |         |    |
|-------|----------|----------|--------------|-----------------|-------|------|------|---|---------|----|
| chr17 | 48619111 | 48619794 | SPATA20      | ENSG00000006282 | -967  | 0.24 | 0.24 | 1 | -0.0006 | NA |
| chr17 | 48796750 | 48797317 | LUC7L3       | ENSG00000108848 | 128   | 0.19 | 0.18 | 1 | 0.013   | NA |
| chr17 | 49021856 | 49022279 | RP11-700H6.1 | ENSG00000247011 | 7     | 0.85 | 0.88 | 1 | -0.022  | NA |
| chr17 | 54990832 | 54991771 | TRIM25       | ENSG00000121060 | 87    | 0.16 | 0.16 | 1 | 0.0015  | NA |
| chr17 | 55055296 | 55055555 | SCPEP1       | ENSG00000121064 | -43   | 0.21 | 0.18 | 1 | 0.031   | NA |
| chr17 | 56429455 | 56429906 | SUPT4H1      | ENSG00000213246 | -117  | 0.29 | 0.5  | 1 | -0.21   | NA |
| chr17 | 60501111 | 60501756 | METTL2A      | ENSG00000087995 | 187   | 0.17 | 0.17 | 1 | -0.0044 | NA |
| chr17 | 61818684 | 61819397 | STRADA       | ENSG00000125695 | 290   | 0.19 | 0.18 | 1 | 0.0026  | NA |
| chr17 | 63133330 | 63133592 | RGS9         | ENSG00000108370 | 5     | 0.17 | 0.19 | 1 | -0.024  | NA |
| chr17 | 64187712 | 64188586 | CEP112       | ENSG00000154240 | -334  | 0.22 | 0.22 | 1 | -0.0049 | NA |
| chr17 | 65240725 | 65242498 | HELZ         | ENSG00000198265 | -312  | 0.18 | 0.18 | 1 | -0.0013 | NA |
| chr17 | 65821126 | 65821381 | BPTF         | ENSG00000171634 | -384  | 0.18 | 0.18 | 1 | -0.0056 | NA |
| chr17 | 66031784 | 66032292 | KPNA2        | ENSG00000182481 | 190   | 0.26 | 0.26 | 1 | 0.0016  | NA |
| chr17 | 71431621 | 71431878 | SDK2         | ENSG00000069188 | -66   | 0.97 | 0.96 | 1 | 0.0074  | NA |
| chr17 | 72270301 | 72270512 | DNAI2        | ENSG00000171595 | 20    | 0.35 | 0.34 | 1 | 0.0085  | NA |
| chr17 | 74068174 | 74068756 | SRP68        | ENSG00000167881 | 113   | 0.25 | 0.25 | 1 | #####   | NA |
| chr17 | 75084622 | 75085085 | C17orf86     | ENSG00000234912 | 98    | 0.19 | 0.22 | 1 | -0.03   | NA |
| chr17 | 75277317 | 75278172 | 9-Sep        | ENSG00000184640 | 252   | 0.26 | 0.26 | 1 | -0.002  | NA |
| chr17 | 76037074 | 76037323 | TNRC6C       | ENSG00000078687 | 70    | 0.12 | 0.12 | 1 | -0.0067 | NA |
| chr17 | 76164395 | 76165272 | SYNGR2       | ENSG00000108639 | 162   | 0.19 | 0.2  | 1 | -0.0018 | NA |
| chr17 | 76183077 | 76183449 | TK1          | ENSG00000167900 | -152  | 0.27 | 0.27 | 1 | -0.0003 | NA |
| chr17 | 76395406 | 76395617 | SNORA30      | ENSG00000200063 | -505  | 0.95 | 1    | 1 | -0.049  | NA |
| chr17 | 76421441 | 76421766 | DNAH17       | ENSG00000187775 | 1198  | 0.9  | 0.9  | 1 | 0.0082  | NA |
| chr17 | 77924080 | 77924423 | TBC1D16      | ENSG00000167291 | 386   | 0.95 | 0.92 | 1 | 0.024   | NA |
| chr17 | 78120322 | 78121543 | EIF4A3       | ENSG00000141543 | 50    | 0.34 | 0.34 | 1 | 0.00067 | NA |
| chr17 | 79994780 | 79995664 | DCXR         | ENSG00000169738 | 351   | 0.19 | 0.19 | 1 | -0.001  | NA |
| chr17 | 80170322 | 80171302 | CCDC57       | ENSG00000176155 | -123  | 0.23 | 0.23 | 1 | -0.001  | NA |
| chr17 | 80206689 | 80206927 | AC132872.1   | ENSG00000184551 | -135  | 0.93 | 0.92 | 1 | 0.009   | NA |
| chr17 | 80373276 | 80373490 | Y_RNA        | ENSG00000201239 | -1719 | 1    | 0.97 | 1 | 0.026   | NA |
| chr17 | 80376412 | 80376761 | C17orf101    | ENSG00000181396 | -73   | 0.2  | 0.21 | 1 | -0.013  | NA |

|       |           |          |            |                 |      |      |      |          |        |    |
|-------|-----------|----------|------------|-----------------|------|------|------|----------|--------|----|
| chr17 | 80541548  | 80541754 | snoU13     | ENSG00000238403 | 1270 | 0.94 | 1    | 1        | -0.059 | NA |
| chr17 | 2415061   | 2415362  | METTL16    | ENSG00000127804 | -82  | 0.75 | NA   | NA       | NA     | NA |
| chr17 | 2607735   | 2608005  | KIAA0664   | ENSG00000132361 | -26  | 0.88 | NA   | NA       | NA     | NA |
| chr17 | 4699383   | 4699638  | PSMB6      | ENSG00000142507 | 71   | 1    | NA   | NA       | NA     | NA |
| chr17 | 6460071   | 6460302  | PITPNM3    | ENSG00000091622 | -309 | 0.66 | NA   | NA       | NA     | NA |
| chr17 | 7137358   | 7138133  | DVL2       | ENSG00000004975 | 123  | 0.19 | NA   | NA       | NA     | NA |
| chr17 | 8279753   | 8280109  | KRBA2      | ENSG00000184619 | 98   | 0.32 | NA   | NA       | NA     | NA |
| chr17 | 171109893 | 17110296 | PLD6       | ENSG00000179598 | -448 | 0.17 | NA   | NA       | NA     | NA |
| chr17 | 18966946  | 18967196 | SNORD3B-2  | ENSG00000201750 | 378  | NA   | 0.25 | NA       | NA     | NA |
| chr17 | 19014144  | 19014604 | SNORD3D    | ENSG00000199663 | 1575 | 0.08 | NA   | NA       | NA     | NA |
| chr17 | 27055187  | 27056056 | NEK8       | ENSG00000160602 | -201 | 0.47 | NA   | NA       | NA     | NA |
| chr17 | 36719544  | 36719938 | SRCIN1     | ENSG00000017373 | -81  | 0.75 | NA   | NA       | NA     | NA |
| chr17 | 36997448  | 36997661 | C17orf98   | ENSG00000214556 | 110  | 1    | NA   | NA       | NA     | NA |
| chr17 | 37307962  | 37308166 | PLXDC1     | ENSG00000161381 | -162 | 0.17 | NA   | NA       | NA     | NA |
| chr17 | 37764092  | 37764304 | NEUROD2    | ENSG00000171532 | -2   | 0.17 | NA   | NA       | NA     | NA |
| chr17 | 41278134  | 41278460 | NBR2       | ENSG00000198496 | 636  | 1    | NA   | NA       | NA     | NA |
| chr17 | 44895800  | 44897025 | WNT3       | ENSG00000108379 | -330 | NA   | 1    | NA       | NA     | NA |
| chr17 | 45608280  | 45608981 | NPEPPS     | ENSG00000141279 | 200  | NA   | 0.25 | NA       | NA     | NA |
| chr17 | 46695325  | 46695553 | AC103702.1 | ENSG00000248304 | 979  | 0.27 | NA   | NA       | NA     | NA |
| chr17 | 51834650  | 51834900 | AC090079.1 | ENSG00000233380 | 456  | 1    | NA   | NA       | NA     | NA |
| chr17 | 74554140  | 74554361 | AC090699.1 | ENSG00000163597 | 390  | 1    | NA   | NA       | NA     | NA |
| chr17 | 77812016  | 77812276 | CBX4       | ENSG00000141582 | -466 | 1    | NA   | NA       | NA     | NA |
| chr17 | 79259282  | 79259537 | SLC38A10   | ENSG00000157637 | 105  | 0.78 | NA   | NA       | NA     | NA |
| chr17 | 79981682  | 79981963 | LRRC45     | ENSG00000169683 | 542  | 0.37 | NA   | NA       | NA     | NA |
| chr18 | 11750953  | 11752756 | GNAL       | ENSG00000141404 | 383  | 0.37 | 0.24 | 3.80E-07 | 0.13   | NA |
| chr18 | 8784147   | 8784583  | KIAA0802   | ENSG00000168502 | -178 | 0.98 | 0.73 | 8.80E-07 | 0.24   | NA |
| chr18 | 28621489  | 28623117 | DSC3       | ENSG00000134762 | 478  | 0.16 | 0.31 | 9.40E-07 | -0.15  | NA |
| chr18 | 71958141  | 71959770 | CYB5A      | ENSG00000166347 | 215  | 0.46 | 0.23 | 9.60E-07 | 0.23   | NA |
| chr18 | 19744936  | 19752363 | AC091588.1 | ENSG00000245382 | 280  | 0.27 | 0.2  | 3.30E-06 | 0.065  | NA |
| chr18 | 48494276  | 48494627 | ELAC1      | ENSG00000141642 | 65   | 1    | 0.34 | 6.70E-06 | 0.66   | NA |

|       |          |          |            |                 |       |      |      |          |       |    |
|-------|----------|----------|------------|-----------------|-------|------|------|----------|-------|----|
| chr18 | 72923054 | 72924182 | TSHZ1      | ENSG00000179981 | 866   | 0.23 | 0.13 | 7.40E-06 | 0.099 | NA |
| chr18 | 74533809 | 74535905 | ZNF236     | ENSG00000130856 | -1259 | 0.33 | 0.23 | 9.40E-06 | 0.11  | NA |
| chr18 | 52495604 | 52496007 | RAB27B     | ENSG00000041353 | 97    | 0.52 | 0.21 | 1.70E-05 | 0.3   | NA |
| chr18 | 77748045 | 77748905 | TXNL4A     | ENSG00000141759 | 43    | 0.24 | 0.1  | 1.80E-05 | 0.14  | NA |
| chr18 | 55862653 | 55862873 | NEDD4L     | ENSG00000049759 | 126   | 0.69 | 0.25 | 3.20E-05 | 0.44  | NA |
| chr18 | 77623265 | 77624280 | KCNG2      | ENSG00000178342 | 104   | 0.76 | 0.63 | 0.00012  | 0.13  | NA |
| chr18 | 77439094 | 77440398 | AC068473.1 | ENSG00000178412 | -1    | 0.21 | 0.13 | 0.00014  | 0.076 | NA |
| chr18 | 46065533 | 46067826 | CTIF       | ENSG00000134030 | 1252  | 0.24 | 0.16 | 0.00015  | 0.083 | NA |
| chr18 | 59000683 | 59001692 | CDH20      | ENSG00000101542 | 199   | 0.26 | 0.14 | 0.00035  | 0.13  | NA |
| chr18 | 6413959  | 6414873  | L3MBTL4    | ENSG00000154655 | 494   | 0.44 | 0.3  | 4.00E-04 | 0.14  | NA |
| chr18 | 29671757 | 29673314 | RNF138     | ENSG00000134758 | 707   | 0.22 | 0.15 | 0.00055  | 0.066 | NA |
| chr18 | 28681320 | 28682455 | DSC2       | ENSG00000134755 | -457  | 0.22 | 0.38 | 0.00064  | -0.16 | NA |
| chr18 | 32820785 | 32821203 | ZNF397     | ENSG00000186812 | 0     | 0.18 | 0.38 | 0.00074  | -0.2  | NA |
| chr18 | 811649   | 812709   | YES1       | ENSG00000176105 | 148   | 0.31 | 0.2  | 0.00098  | 0.11  | NA |
| chr18 | 32556654 | 32557883 | MAPRE2     | ENSG00000166974 | 376   | 0.16 | 0.26 | 0.0012   | -0.1  | NA |
| chr18 | 499315   | 500722   | COLEC12    | ENSG00000158270 | 711   | 0.22 | 0.35 | 0.0013   | -0.13 | NA |
| chr18 | 44336183 | 44337110 | ST8SIA5    | ENSG00000101638 | 126   | 0.2  | 0.13 | 0.0013   | 0.073 | NA |
| chr18 | 30349690 | 30352302 | AC012123.1 | ENSG00000228835 | 1238  | 0.35 | 0.26 | 0.002    | 0.092 | NA |
| chr18 | 25755414 | 25758175 | CDH2       | ENSG00000170558 | 616   | 0.23 | 0.17 | 0.0023   | 0.064 | NA |
| chr18 | 55019707 | 55021605 | ST8SIA3    | ENSG00000177511 | 935   | 0.32 | 0.21 | 0.0023   | 0.1   | NA |
| chr18 | 3012547  | 3013173  | LPIN2      | ENSG00000101577 | 453   | 0.21 | 0.38 | 0.0025   | -0.17 | NA |
| chr18 | 13217073 | 13219044 | C18orf1    | ENSG00000168675 | -728  | 0.25 | 0.18 | 0.0034   | 0.072 | NA |
| chr18 | 712232   | 713086   | ENOSF1     | ENSG00000132199 | -115  | 0.38 | 0.26 | 0.0039   | 0.12  | NA |
| chr18 | 21242366 | 21242805 | ANKRD29    | ENSG00000154065 | 264   | 0.67 | 0.78 | 0.0041   | -0.11 | NA |
| chr18 | 32870175 | 32870512 | ZSCAN30    | ENSG00000186814 | -147  | 0.33 | 0.15 | 0.0054   | 0.19  | NA |
| chr18 | 70533965 | 70536871 | NETO1      | ENSG00000166342 | -234  | 0.22 | 0.17 | 0.006    | 0.05  | NA |
| chr18 | 47087879 | 47088528 | LIPG       | ENSG00000101670 | -224  | 0.31 | 0.2  | 0.0071   | 0.11  | NA |
| chr18 | 9334778  | 9335359  | TWSG1      | ENSG00000128791 | 303   | 0.25 | 0.13 | 0.0074   | 0.12  | NA |
| chr18 | 5628324  | 5630785  | EPB41L3    | ENSG00000082397 | -564  | 0.2  | 0.14 | 0.0082   | 0.056 | NA |
| chr18 | 44676470 | 44677057 | HDHD2      | ENSG00000167220 | 108   | 0.27 | 0.16 | 0.0087   | 0.11  | NA |



|       |          |          |            |                 |       |      |      |       |        |    |
|-------|----------|----------|------------|-----------------|-------|------|------|-------|--------|----|
| chr18 | 2846565  | 2848175  | EMILIN2    | ENSG00000132205 | 342   | 0.16 | 0.23 | 0.011 | -0.064 | NA |
| chr18 | 18690940 | 18692059 | ROCK1      | ENSG00000067900 | 313   | 0.22 | 0.15 | 0.011 | 0.063  | NA |
| chr18 | 56939624 | 56941540 | RAX        | ENSG00000134438 | 35    | 0.28 | 0.21 | 0.012 | 0.064  | NA |
| chr18 | 3448006  | 3452360  | TGIF1      | ENSG00000177426 | 1686  | 0.22 | 0.18 | 0.015 | 0.045  | NA |
| chr18 | 11689061 | 11690108 | GNAL       | ENSG00000141404 | 400   | 0.32 | 0.22 | 0.015 | 0.1    | NA |
| chr18 | 12254147 | 12255089 | CIDEA      | ENSG00000176194 | 300   | 0.49 | 0.36 | 0.015 | 0.13   | NA |
| chr18 | 77793336 | 77793925 | RBFA       | ENSG00000101546 | -716  | 0.15 | 0.3  | 0.016 | -0.15  | NA |
| chr18 | 12376538 | 12377306 | AFG3L2     | ENSG00000141385 | 329   | 0.18 | 0.12 | 0.017 | 0.059  | NA |
| chr18 | 76737005 | 76741244 | SALL3      | ENSG00000151514 | -1151 | 0.22 | 0.26 | 0.017 | -0.04  | NA |
| chr18 | 49868377 | 49868759 | DCC        | ENSG00000187323 | 1410  | 0.22 | 1    | 0.018 | -0.78  | NA |
| chr18 | 72916107 | 72917233 | ZADH2      | ENSG00000180011 | 528   | 0.25 | 0.18 | 0.018 | 0.074  | NA |
| chr18 | 29077552 | 29078526 | DSG2       | ENSG00000046604 | 12    | 0.3  | 0.21 | 0.022 | 0.09   | NA |
| chr18 | 31020510 | 31020847 | C18orf34   | ENSG00000166960 | -21   | 0.18 | 0.09 | 0.022 | 0.095  | NA |
| chr18 | 74091237 | 74091900 | ZNF516     | ENSG00000101493 | 673   | 0.91 | 0.97 | 0.022 | -0.063 | NA |
| chr18 | 48085838 | 48087589 | MAPK4      | ENSG00000141639 | 229   | 0.24 | 0.19 | 0.023 | 0.052  | NA |
| chr18 | 74514040 | 74514292 | U6         | ENSG00000252097 | -1436 | 0.15 | 0.27 | 0.026 | -0.13  | NA |
| chr18 | 11980483 | 11982142 | IMPA2      | ENSG00000141401 | -115  | 0.21 | 0.16 | 0.027 | 0.051  | NA |
| chr18 | 12883285 | 12884578 | PTPN2      | ENSG00000175354 | 267   | 0.22 | 0.16 | 0.03  | 0.059  | NA |
| chr18 | 9474804  | 9475978  | RALBP1     | ENSG00000017797 | 384   | 0.19 | 0.26 | 0.031 | -0.068 | NA |
| chr18 | 32073444 | 32074292 | DTNA       | ENSG00000134769 | 587   | 0.29 | 0.19 | 0.033 | 0.093  | NA |
| chr18 | 12431189 | 12431659 | AP001029.2 | ENSG00000256786 | -157  | 0.89 | 0.96 | 0.036 | -0.072 | NA |
| chr18 | 42258983 | 42260795 | SETBP1     | ENSG00000152217 | -249  | 0.19 | 0.26 | 0.039 | -0.07  | NA |
| chr18 | 61637425 | 61637941 | SERPINB8   | ENSG00000166401 | 200   | 0.32 | 0.21 | 0.039 | 0.11   | NA |
| chr18 | 14378491 | 14378758 | TERF1P2    | ENSG00000187589 | 12    | 0.33 | 0.14 | 0.04  | 0.18   | NA |
| chr18 | 45662314 | 45663520 | ZBTB7C     | ENSG00000184828 | 751   | 0.19 | 0.27 | 0.04  | -0.082 | NA |
| chr18 | 48722530 | 48723760 | MEX3C      | ENSG00000176624 | 545   | 0.23 | 0.18 | 0.041 | 0.054  | NA |
| chr18 | 56530395 | 56531288 | ZNF532     | ENSG00000074657 | 1009  | 0.26 | 0.2  | 0.043 | 0.065  | NA |
| chr18 | 71982752 | 71983744 | AC008021.1 | ENSG00000206043 | 138   | 0.97 | 1    | 0.05  | -0.033 | NA |
| chr18 | 77710769 | 77712454 | PQLC1      | ENSG00000122490 | -794  | 0.22 | 0.17 | 0.06  | 0.045  | NA |
| chr18 | 11908222 | 11909082 | MPPE1      | ENSG00000154889 | -358  | 0.28 | 0.2  | 0.062 | 0.081  | NA |

|       |          |          |            |                 |       |      |      |       |        |    |
|-------|----------|----------|------------|-----------------|-------|------|------|-------|--------|----|
| chr18 | 15330548 | 15331174 | AP005901.1 | ENSG00000215512 | -580  | 0.97 | 0.9  | 0.065 | 0.073  | NA |
| chr18 | 32923915 | 32924585 | ZNF24      | ENSG00000172466 | 141   | 0.22 | 0.29 | 0.065 | -0.074 | NA |
| chr18 | 20513119 | 20513857 | RBBP8      | ENSG00000101773 | 198   | 0.25 | 0.18 | 0.067 | 0.069  | NA |
| chr18 | 47339411 | 47340956 | ACAA2      | ENSG00000167315 | 90    | 0.19 | 0.28 | 0.07  | -0.085 | NA |
| chr18 | 9707752  | 9709311  | RAB31      | ENSG00000168461 | 303   | 0.3  | 0.24 | 0.071 | 0.06   | NA |
| chr18 | 12991061 | 12991696 | CEP192     | ENSG00000101639 | 17    | 0.18 | 0.12 | 0.073 | 0.064  | NA |
| chr18 | 45456484 | 45458024 | SMAD2      | ENSG00000175387 | -324  | 0.23 | 0.19 | 0.073 | 0.041  | NA |
| chr18 | 47792742 | 47793036 | CCDC11     | ENSG00000172361 | -24   | 0.17 | 0.1  | 0.083 | 0.072  | NA |
| chr18 | 67067509 | 67069168 | DOK6       | ENSG00000206052 | 54    | 0.28 | 0.22 | 0.089 | 0.066  | NA |
| chr18 | 24764951 | 24765507 | CHST9      | ENSG00000154080 | 60    | 0.18 | 0.26 | 0.091 | -0.074 | NA |
| chr18 | 53257018 | 53257309 | TCF4       | ENSG00000196628 | -118  | 0.47 | 0.27 | 0.094 | 0.2    | NA |
| chr18 | 14132000 | 14132482 | ZNF519     | ENSG00000175322 | 248   | 0.22 | 0.41 | 0.097 | -0.19  | NA |
| chr18 | 10454082 | 10454296 | APCDD1     | ENSG00000154856 | -436  | 0.3  | 0.47 | 0.11  | -0.17  | NA |
| chr18 | 43753303 | 43755104 | C18orf25   | ENSG00000152242 | 215   | 0.21 | 0.25 | 0.11  | -0.047 | NA |
| chr18 | 55710828 | 55712532 | NEDD4L     | ENSG00000049759 | 61    | 0.23 | 0.19 | 0.12  | 0.039  | NA |
| chr18 | 66381934 | 66382575 | TMX3       | ENSG00000166479 | 40    | 0.18 | 0.12 | 0.13  | 0.059  | NA |
| chr18 | 72162935 | 72164039 | CNDP2      | ENSG00000133313 | 44    | 0.24 | 0.2  | 0.13  | 0.045  | NA |
| chr18 | 74961556 | 74963822 | GALR1      | ENSG00000166573 | 184   | 0.23 | 0.27 | 0.13  | -0.043 | NA |
| chr18 | 47087075 | 47087446 | LIPG       | ENSG00000101670 | -1167 | 0.15 | 0.21 | 0.14  | -0.067 | NA |
| chr18 | 47813434 | 47814546 | CXXC1      | ENSG00000154832 | 684   | 0.23 | 0.16 | 0.14  | 0.066  | NA |
| chr18 | 55288640 | 55289482 | NARS       | ENSG00000134440 | -44   | 0.21 | 0.16 | 0.14  | 0.057  | NA |
| chr18 | 21033071 | 21033657 | RIOK3      | ENSG00000101782 | 577   | 0.13 | 0.22 | 0.15  | -0.087 | NA |
| chr18 | 21977275 | 21978110 | OSBPL1A    | ENSG00000141447 | 60    | 0.21 | 0.16 | 0.15  | 0.047  | NA |
| chr18 | 72264517 | 72265964 | AC116904.1 | ENSG00000206029 | -169  | 0.24 | 0.19 | 0.15  | 0.042  | NA |
| chr18 | 267710   | 268382   | THOC1      | ENSG00000079134 | 13    | 0.2  | 0.27 | 0.16  | -0.067 | NA |
| chr18 | 29264703 | 29265504 | B4GALT6    | ENSG00000118276 | -417  | 0.17 | 0.13 | 0.16  | 0.032  | NA |
| chr18 | 33077545 | 33078063 | INO80C     | ENSG00000153391 | 117   | 0.5  | 1    | 0.17  | -0.5   | NA |
| chr18 | 48405135 | 48405983 | ME2        | ENSG00000082212 | 140   | 0.18 | 0.22 | 0.17  | -0.046 | NA |
| chr18 | 56806608 | 56807425 | SEC11C     | ENSG00000166562 | -71   | 0.18 | 0.23 | 0.17  | -0.055 | NA |
| chr18 | 22006310 | 22007007 | IMPACT     | ENSG00000154059 | 78    | 0.22 | 0.27 | 0.18  | -0.054 | NA |

|       |          |          |           |                 |       |      |      |      |        |    |
|-------|----------|----------|-----------|-----------------|-------|------|------|------|--------|----|
| chr18 | 45934453 | 45937265 | ZBTB7C    | ENSG00000184828 | -196  | 0.19 | 0.21 | 0.18 | -0.022 | NA |
| chr18 | 8704721  | 8707557  | KIAA0802  | ENSG00000168502 | -374  | 0.18 | 0.2  | 0.19 | -0.024 | NA |
| chr18 | 60986621 | 60988286 | BCL2      | ENSG00000171791 | -92   | 0.2  | 0.24 | 0.19 | -0.036 | NA |
| chr18 | 57566866 | 57567723 | PMAIP1    | ENSG00000141682 | 114   | 0.24 | 0.19 | 0.2  | 0.051  | NA |
| chr18 | 63417775 | 63418640 | CDH7      | ENSG00000081138 | 318   | 0.27 | 0.22 | 0.2  | 0.058  | NA |
| chr18 | 29522401 | 29523577 | TRAPPC8   | ENSG00000153339 | 74    | 0.17 | 0.14 | 0.21 | 0.038  | NA |
| chr18 | 7566557  | 7568830  | PTPRM     | ENSG00000173482 | -124  | 0.2  | 0.18 | 0.22 | 0.025  | NA |
| chr18 | 14747516 | 14748231 | ANKRD30B  | ENSG00000180777 | -366  | 0.18 | 0.25 | 0.22 | -0.071 | NA |
| chr18 | 21083161 | 21084153 | C18orf8   | ENSG00000141452 | 195   | 0.19 | 0.22 | 0.22 | -0.034 | NA |
| chr18 | 77170427 | 77171445 | NFATC1    | ENSG00000131196 | 848   | 0.97 | 0.99 | 0.22 | -0.026 | NA |
| chr18 | 3261708  | 3262671  | MYL12B    | ENSG00000118680 | 282   | 0.19 | 0.24 | 0.23 | -0.046 | NA |
| chr18 | 11851209 | 11852122 | CHMP1B    | ENSG00000255112 | 226   | 0.15 | 0.2  | 0.23 | -0.043 | NA |
| chr18 | 74202750 | 74203076 | ZNF516    | ENSG00000101493 | -178  | 0.18 | 0.23 | 0.23 | -0.049 | NA |
| chr18 | 3879202  | 3880087  | DLGAP1    | ENSG00000170579 | 432   | 0.98 | 0.96 | 0.24 | 0.022  | NA |
| chr18 | 2654918  | 2656817  | SMCHD1    | ENSG00000101596 | -19   | 0.19 | 0.16 | 0.25 | 0.032  | NA |
| chr18 | 46474931 | 46479364 | SMAD7     | ENSG00000101665 | -1444 | 0.22 | 0.2  | 0.27 | 0.021  | NA |
| chr18 | 47807857 | 47809365 | MBD1      | ENSG00000141644 | -741  | 0.29 | 0.34 | 0.27 | -0.043 | NA |
| chr18 | 21594013 | 21595464 | TTC39C    | ENSG00000168234 | 354   | 0.21 | 0.18 | 0.28 | 0.026  | NA |
| chr18 | 44337510 | 44338100 | ST8SIA5   | ENSG00000101638 | -673  | 0.18 | 0.23 | 0.29 | -0.047 | NA |
| chr18 | 51883947 | 51884994 | C18orf54  | ENSG00000166845 | -485  | 0.27 | 0.22 | 0.29 | 0.049  | NA |
| chr18 | 14178943 | 14179710 | ANKRD20A5 | ENSG00000186481 | 230   | 0.33 | 0.45 | 0.31 | -0.11  | NA |
| chr18 | 47719866 | 47721742 | MYO5B     | ENSG00000167306 | 647   | 0.25 | 0.22 | 0.31 | 0.03   | NA |
| chr18 | 31804480 | 31804875 | NOL4      | ENSG00000101746 | -1162 | 0.17 | 0.23 | 0.32 | -0.052 | NA |
| chr18 | 44561025 | 44561822 | TCEB3B    | ENSG00000206181 | 565   | 0.95 | 0.97 | 0.32 | -0.027 | NA |
| chr18 | 51750712 | 51751191 | MBD2      | ENSG00000134046 | 207   | 0.21 | 0.18 | 0.32 | 0.038  | NA |
| chr18 | 78004028 | 78005438 | PARD6G    | ENSG00000178184 | 696   | 0.21 | 0.19 | 0.32 | 0.019  | NA |
| chr18 | 657401   | 658745   | TYMS      | ENSG00000176890 | 469   | 0.2  | 0.16 | 0.33 | 0.038  | NA |
| chr18 | 9333896  | 9334244  | TWSG1     | ENSG00000128791 | -695  | 0.29 | 0.19 | 0.33 | 0.097  | NA |
| chr18 | 44772992 | 44775577 | SKOR2     | ENSG00000215474 | 1270  | 0.29 | 0.27 | 0.33 | 0.02   | NA |
| chr18 | 55102427 | 55102708 | ONECUT2   | ENSG00000119547 | -350  | 0.16 | 0.12 | 0.33 | 0.041  | NA |

|       |          |          |               |                 |      |      |      |      |        |    |
|-------|----------|----------|---------------|-----------------|------|------|------|------|--------|----|
| chr18 | 67955692 | 67957062 | SOCS6         | ENSG00000170677 | 209  | 0.25 | 0.22 | 0.33 | 0.03   | NA |
| chr18 | 77724352 | 77724836 | HSBP1L1       | ENSG00000226742 | 12   | 0.2  | 0.14 | 0.33 | 0.054  | NA |
| chr18 | 21166158 | 21167066 | NPC1          | ENSG00000141458 | -166 | 0.21 | 0.18 | 0.34 | 0.032  | NA |
| chr18 | 33647065 | 33647665 | RPRD1A        | ENSG00000141425 | 154  | 0.45 | 0.25 | 0.36 | 0.2    | NA |
| chr18 | 56338211 | 56339277 | MALT1         | ENSG00000172175 | 126  | 0.18 | 0.22 | 0.38 | -0.038 | NA |
| chr18 | 3247293  | 3248257  | MYL12A        | ENSG00000101608 | 247  | 0.2  | 0.17 | 0.39 | 0.032  | NA |
| chr18 | 30050115 | 30051345 | FAM59A        | ENSG00000141441 | -335 | 0.18 | 0.15 | 0.39 | 0.028  | NA |
| chr18 | 59853977 | 59855252 | PIGN          | ENSG00000197563 | -325 | 0.27 | 0.31 | 0.4  | -0.038 | NA |
| chr18 | 61089262 | 61090357 | VPS4B         | ENSG00000119541 | -116 | 0.2  | 0.23 | 0.41 | -0.03  | NA |
| chr18 | 21269269 | 21270349 | LAMA3         | ENSG00000053747 | 247  | 0.21 | 0.24 | 0.42 | -0.031 | NA |
| chr18 | 23806283 | 23807093 | TAF4B         | ENSG00000141384 | 279  | 0.17 | 0.2  | 0.42 | -0.026 | NA |
| chr18 | 44526866 | 44527137 | KATNAL2       | ENSG00000167216 | 214  | 0.19 | 0.27 | 0.42 | -0.079 | NA |
| chr18 | 60189509 | 60192109 | ZCCHC2        | ENSG00000141664 | 151  | 0.19 | 0.2  | 0.42 | -0.017 | NA |
| chr18 | 77794360 | 77794761 | RBFA          | ENSG00000101546 | 202  | 0.2  | 0.25 | 0.43 | -0.05  | NA |
| chr18 | 72919914 | 72921785 | ZADH2         | ENSG00000180011 | 454  | 0.25 | 0.23 | 0.44 | 0.022  | NA |
| chr18 | 48911    | 49655    | RP11-683L23.1 | ENSG00000173213 | 274  | 0.96 | 1    | 0.45 | -0.042 | NA |
| chr18 | 19284165 | 19285052 | ABHD3         | ENSG00000158201 | 158  | 0.21 | 0.25 | 0.45 | -0.045 | NA |
| chr18 | 158278   | 159311   | USP14         | ENSG00000101557 | 311  | 0.15 | 0.13 | 0.46 | 0.027  | NA |
| chr18 | 12307554 | 12309043 | TUBB6         | ENSG00000176014 | 228  | 0.2  | 0.22 | 0.46 | -0.021 | NA |
| chr18 | 47901254 | 47901662 | SKA1          | ENSG00000154839 | 93   | 0.13 | 0.21 | 0.46 | -0.079 | NA |
| chr18 | 9913464  | 9915164  | VAPA          | ENSG00000101558 | 315  | 0.16 | 0.18 | 0.48 | -0.024 | NA |
| chr18 | 10525841 | 10526433 | NAPG          | ENSG00000134265 | 264  | 0.22 | 0.18 | 0.48 | 0.033  | NA |
| chr18 | 33160891 | 33162264 | GALNT1        | ENSG00000141429 | 574  | 0.23 | 0.25 | 0.48 | -0.026 | NA |
| chr18 | 51795711 | 51796332 | POLI          | ENSG00000101751 | 132  | 0.32 | 0.25 | 0.49 | 0.072  | NA |
| chr18 | 43913345 | 43914477 | RNF165        | ENSG00000141622 | -276 | 0.21 | 0.25 | 0.5  | -0.04  | NA |
| chr18 | 12947924 | 12948654 | SEH1L         | ENSG00000085415 | 306  | 0.19 | 0.16 | 0.51 | 0.024  | NA |
| chr18 | 43651796 | 43652455 | PSTPIP2       | ENSG00000152229 | 98   | 0.22 | 0.24 | 0.52 | -0.027 | NA |
| chr18 | 7116852  | 7118241  | LAMA1         | ENSG00000101680 | 267  | 0.22 | 0.2  | 0.53 | 0.02   | NA |
| chr18 | 12076434 | 12076799 | AP002414.1    | ENSG00000256616 | 37   | 0.41 | 0.48 | 0.53 | -0.067 | NA |
| chr18 | 60382304 | 60384371 | PHLPP1        | ENSG00000081913 | 665  | 0.2  | 0.19 | 0.53 | 0.011  | NA |

|       |          |          |            |                 |       |      |      |      |        |    |
|-------|----------|----------|------------|-----------------|-------|------|------|------|--------|----|
| chr18 | 31802358 | 31803792 | NOL4       | ENSG00000101746 | 371   | 0.19 | 0.21 | 0.54 | -0.023 | NA |
| chr18 | 77905297 | 77905566 | AC139100.1 | ENSG00000226924 | -376  | 0.24 | 0.5  | 0.56 | -0.26  | NA |
| chr18 | 33876727 | 33878487 | FHOD3      | ENSG00000134775 | -95   | 0.19 | 0.18 | 0.57 | 0.015  | NA |
| chr18 | 11148307 | 11149936 | FAM38B     | ENSG00000154864 | -360  | 0.17 | 0.18 | 0.58 | -0.012 | NA |
| chr18 | 12657044 | 12658727 | SPIRE1     | ENSG00000134278 | 27    | 0.2  | 0.19 | 0.58 | 0.011  | NA |
| chr18 | 55253544 | 55254093 | FECH       | ENSG00000066926 | 68    | 0.19 | 0.16 | 0.58 | 0.032  | NA |
| chr18 | 46986504 | 46987194 | DYM        | ENSG00000141627 | 230   | 0.22 | 0.2  | 0.6  | 0.026  | NA |
| chr18 | 33708919 | 33710236 | SLC39A6    | ENSG00000141424 | -270  | 0.18 | 0.2  | 0.62 | -0.019 | NA |
| chr18 | 5196243  | 5197389  | C18orf42   | ENSG00000231824 | 439   | 0.21 | 0.24 | 0.64 | -0.023 | NA |
| chr18 | 23713728 | 23713953 | PSMA8      | ENSG00000154611 | 24    | 0.69 | 0.73 | 0.64 | -0.033 | NA |
| chr18 | 29598566 | 29599460 | RNF125     | ENSG00000101695 | 678   | 0.14 | 0.22 | 0.64 | -0.082 | NA |
| chr18 | 70208974 | 70211790 | CBLN2      | ENSG00000141668 | 1392  | 0.21 | 0.22 | 0.64 | -0.016 | NA |
| chr18 | 77171704 | 77172118 | NFATC1     | ENSG00000131196 | 1823  | 0.85 | 1    | 0.64 | -0.15  | NA |
| chr18 | 47013321 | 47013901 | C18orf32   | ENSG00000177576 | -10   | 0.16 | 0.18 | 0.65 | -0.015 | NA |
| chr18 | 35144907 | 35147628 | CELF4      | ENSG00000101489 | -267  | 0.23 | 0.22 | 0.66 | 0.015  | NA |
| chr18 | 74206239 | 74208638 | ZNF516     | ENSG00000101493 | -292  | 0.23 | 0.21 | 0.66 | 0.016  | NA |
| chr18 | 5542847  | 5543054  | EPB41L3    | ENSG00000082397 | 1061  | 0.5  | 1    | 0.67 | -0.5   | NA |
| chr18 | 24443200 | 24443458 | CHST9-AS1  | ENSG00000236721 | -1943 | 0.11 | 0.18 | 0.67 | -0.07  | NA |
| chr18 | 48724198 | 48724425 | MEX3C      | ENSG00000176624 | -621  | 0.17 | 0.15 | 0.68 | 0.024  | NA |
| chr18 | 12702184 | 12703242 | PSMG2      | ENSG00000128789 | 288   | 0.24 | 0.23 | 0.69 | 0.014  | NA |
| chr18 | 5543437  | 5544241  | EPB41L3    | ENSG00000082397 | 172   | 0.19 | 0.22 | 0.7  | -0.029 | NA |
| chr18 | 21017671 | 21018011 | C18orf45   | ENSG00000134490 | -24   | 0.33 | 0.24 | 0.72 | 0.098  | NA |
| chr18 | 47018434 | 47018948 | RPL17      | ENSG00000215472 | 158   | 0.24 | 0.21 | 0.72 | 0.022  | NA |
| chr18 | 48556291 | 48557333 | SMAD4      | ENSG00000141646 | 229   | 0.19 | 0.21 | 0.73 | -0.018 | NA |
| chr18 | 56887091 | 56887665 | GRP        | ENSG00000134443 | -22   | 0.18 | 0.2  | 0.74 | -0.019 | NA |
| chr18 | 5295323  | 5297099  | ZFP161     | ENSG00000198081 | -172  | 0.2  | 0.19 | 0.75 | 0.01   | NA |
| chr18 | 6729693  | 6730037  | ARHGAP28   | ENSG00000088756 | 44    | 0.22 | 0.19 | 0.75 | 0.032  | NA |
| chr18 | 61033978 | 61035056 | KDSR       | ENSG00000119537 | -80   | 0.2  | 0.21 | 0.75 | -0.011 | NA |
| chr18 | 32956764 | 32957406 | ZNF396     | ENSG00000186496 | 216   | 0.19 | 0.17 | 0.76 | 0.02   | NA |
| chr18 | 9102416  | 9102973  | NDUFV2     | ENSG00000178127 | 66    | 0.25 | 0.23 | 0.77 | 0.023  | NA |

|       |          |          |            |                 |       |      |      |      |         |    |
|-------|----------|----------|------------|-----------------|-------|------|------|------|---------|----|
| chr18 | 10454453 | 10455268 | APCDD1     | ENSG00000154856 | 235   | 0.21 | 0.24 | 0.77 | -0.026  | NA |
| chr18 | 18821383 | 18823349 | GREB1L     | ENSG00000141449 | 163   | 0.2  | 0.19 | 0.77 | 0.008   | NA |
| chr18 | 65183237 | 65184014 | AC114689.1 | ENSG00000246923 | -158  | 0.32 | 0.4  | 0.77 | -0.078  | NA |
| chr18 | 59992069 | 59993556 | TNFRSF11A  | ENSG00000141655 | 292   | 0.25 | 0.24 | 0.78 | 0.011   | NA |
| chr18 | 71814555 | 71815716 | FBXO15     | ENSG00000141665 | -69   | 0.2  | 0.17 | 0.78 | 0.028   | NA |
| chr18 | 55469056 | 55471263 | ATP8B1     | ENSG00000081923 | 168   | 0.29 | 0.28 | 0.79 | 0.011   | NA |
| chr18 | 53447074 | 53447842 | AC022031.1 | ENSG00000246990 | 1494  | 0.16 | 0.18 | 0.81 | -0.014  | NA |
| chr18 | 54318456 | 54318785 | TXNL1      | ENSG00000091164 | -115  | 0.18 | 0.16 | 0.82 | 0.028   | NA |
| chr18 | 43677956 | 43678352 | ATP5A1     | ENSG00000152234 | -141  | 0.26 | 0.24 | 0.83 | 0.022   | NA |
| chr18 | 19180049 | 19181026 | ESCO1      | ENSG00000141446 | 308   | 0.2  | 0.2  | 0.85 | 0.0087  | NA |
| chr18 | 43547176 | 43547702 | EPG5       | ENSG00000152223 | -199  | 0.2  | 0.22 | 0.85 | -0.023  | NA |
| chr18 | 19320589 | 19321939 | MIB1       | ENSG00000101752 | -17   | 0.23 | 0.22 | 0.86 | 0.0073  | NA |
| chr18 | 57363714 | 57365001 | CCBE1      | ENSG00000183287 | 217   | 0.19 | 0.2  | 0.87 | -0.0051 | NA |
| chr18 | 72123606 | 72124717 | FAM69C     | ENSG00000187773 | 342   | 0.21 | 0.22 | 0.87 | -0.0077 | NA |
| chr18 | 12432890 | 12433245 | AP001029.2 | ENSG00000256786 | 1486  | 0.99 | 0.98 | 0.88 | 0.0092  | NA |
| chr18 | 34408558 | 34409289 | C18orf10   | ENSG00000134779 | 17    | 0.19 | 0.19 | 0.88 | 0.0082  | NA |
| chr18 | 57026065 | 57026769 | LMAN1      | ENSG00000074695 | 86    | 0.17 | 0.17 | 0.88 | 0.0065  | NA |
| chr18 | 33552151 | 33552952 | C18orf21   | ENSG00000141428 | -197  | 0.19 | 0.2  | 0.89 | -0.008  | NA |
| chr18 | 54305419 | 54306087 | TXNL1      | ENSG00000091164 | 167   | 0.16 | 0.16 | 0.9  | 0.0088  | NA |
| chr18 | 32621215 | 32621689 | MAPRE2     | ENSG00000166974 | 118   | 0.21 | 0.22 | 0.92 | -0.014  | NA |
| chr18 | 43684113 | 43684847 | ATP5A1     | ENSG00000152234 | -287  | 0.25 | 0.26 | 0.96 | -0.018  | NA |
| chr18 | 44702571 | 44702840 | IER3IP1    | ENSG00000134049 | 40    | 0.19 | 0.18 | 0.96 | 0.012   | NA |
| chr18 | 20714968 | 20717071 | CABLES1    | ENSG00000134508 | 292   | 0.2  | 0.2  | 0.98 | 0.0015  | NA |
| chr18 | 44496910 | 44497832 | PIAS2      | ENSG00000078043 | 95    | 0.22 | 0.22 | 0.99 | -0.0031 | NA |
| chr18 | 67872521 | 67873358 | RTTN       | ENSG00000176225 | 23    | 0.21 | 0.21 | 0.99 | -0.007  | NA |
| chr18 | 74203538 | 74205017 | ZNF516     | ENSG00000101493 | -1542 | 0.18 | 0.19 | 0.99 | -0.0041 | NA |
| chr18 | 3729123  | 3729406  | DLGAP1     | ENSG00000170579 | 114   | 0.99 | 0.98 | 1    | 0.0065  | NA |
| chr18 | 5294737  | 5294941  | ZFP161     | ENSG00000198081 | 1200  | 0.29 | 0.27 | 1    | 0.013   | NA |
| chr18 | 9136088  | 9137594  | ANKRD12    | ENSG00000101745 | 83    | 0.21 | 0.21 | 1    | -0.0015 | NA |
| chr18 | 12093607 | 12093842 | ANKRD62    | ENSG00000181626 | -335  | 0.98 | 0.97 | 1    | 0.0037  | NA |

|       |          |          |              |                 |       |      |      |          |         |    |
|-------|----------|----------|--------------|-----------------|-------|------|------|----------|---------|----|
| chr18 | 12325040 | 12326049 | AP005264.1   | ENSG00000221088 | -193  | 0.98 | 0.98 | 1        | 0.0024  | NA |
| chr18 | 12407715 | 12408242 | SLMO1        | ENSG00000141391 | 83    | 0.24 | 0.23 | 1        | 0.0061  | NA |
| chr18 | 13725979 | 13727370 | C18orf19     | ENSG00000177150 | -115  | 0.21 | 0.21 | 1        | 0.0019  | NA |
| chr18 | 13824001 | 13824215 | AP001525.1   | ENSG00000211528 | -123  | 0.12 | 0.13 | 1        | -0.0057 | NA |
| chr18 | 13826186 | 13826523 | MC5R         | ENSG00000176136 | 811   | 0.99 | 0.98 | 1        | 0.0091  | NA |
| chr18 | 19192143 | 19192594 | SNRPD1       | ENSG00000167088 | 108   | 0.2  | 0.2  | 1        | 0.00088 | NA |
| chr18 | 21718862 | 21719550 | CABYR        | ENSG00000154040 | 264   | 0.19 | 0.18 | 1        | 0.013   | NA |
| chr18 | 21851399 | 21852169 | OSBPL1A      | ENSG00000141447 | 412   | 0.16 | 0.17 | 1        | -0.003  | NA |
| chr18 | 22930018 | 22930904 | ZNF521       | ENSG00000198795 | 1753  | 0.19 | 0.21 | 1        | -0.02   | NA |
| chr18 | 23669971 | 23671275 | SS18         | ENSG00000141380 | -62   | 0.26 | 0.26 | 1        | -0.0003 | NA |
| chr18 | 44140362 | 44140575 | LOXHD1       | ENSG00000167210 | -1193 | 0.99 | 1    | 1        | -0.01   | NA |
| chr18 | 59560494 | 59562016 | RNF152       | ENSG00000176641 | -263  | 0.22 | 0.22 | 1        | 0.0021  | NA |
| chr18 | 60985503 | 60985741 | BCL2         | ENSG00000171791 | 991   | 0.27 | 0.26 | 1        | 0.013   | NA |
| chr18 | 68097806 | 68098096 | RP11-644A7.1 | ENSG00000214255 | 484   | 1    | 1    | 1        | 0       | NA |
| chr18 | 76828638 | 76829796 | ATP9B        | ENSG00000166377 | -177  | 0.19 | 0.19 | 1        | -0.0019 | NA |
| chr18 | 2571286  | 2571580  | METTL4       | ENSG00000101574 | 75    | 0.58 | NA   | NA       | NA      | NA |
| chr18 | 44236839 | 44237056 | LOXHD1       | ENSG00000167210 | -10   | 1    | NA   | NA       | NA      | NA |
| chr18 | 44548964 | 44550756 | TCEB3CL      | ENSG00000234298 | 674   | 1    | NA   | NA       | NA      | NA |
| chr18 | 44554879 | 44556671 | TCEB3C       | ENSG00000183791 | 674   | 1    | NA   | NA       | NA      | NA |
| chr18 | 74325809 | 74326082 | AC034110.2   | ENSG00000247645 | -1224 | 0.75 | NA   | NA       | NA      | NA |
| chr19 | 1510493  | 1510725  | ADAMTSL5     | ENSG00000185761 | 342   | 0.15 | 0.68 | 1.30E-09 | -0.54   | NA |
| chr19 | 46916587 | 46916862 | CCDC8        | ENSG00000169515 | 102   | 0.93 | 0.3  | 2.30E-09 | 0.63    | NA |
| chr19 | 50192499 | 50192802 | C19orf76     | ENSG00000224420 | -445  | 0.79 | 0.27 | 2.70E-09 | 0.52    | NA |
| chr19 | 51069359 | 51069600 | LRRC4B       | ENSG00000131409 | 1823  | 0.65 | 0.17 | 3.60E-09 | 0.48    | NA |
| chr19 | 15344091 | 15344419 | EPHX3        | ENSG00000105131 | -397  | 0.77 | 0.38 | 1.20E-08 | 0.39    | NA |
| chr19 | 55895262 | 55898164 | AC020922.1   | ENSG00000233493 | -1086 | 0.38 | 0.23 | 1.40E-08 | 0.16    | NA |
| chr19 | 12917186 | 12917676 | RNASEH2A     | ENSG00000104889 | 3     | 0.1  | 0.46 | 1.70E-08 | -0.35   | NA |
| chr19 | 10196696 | 10197857 | C19orf66     | ENSG00000130813 | 470   | 0.39 | 0.14 | 3.30E-08 | 0.25    | NA |
| chr19 | 7983603  | 7983919  | SNAPC2       | ENSG00000104976 | -1433 | 0.56 | 0.25 | 3.90E-08 | 0.32    | NA |
| chr19 | 48675065 | 48675352 | C19orf68     | ENSG00000185453 | 1259  | 0.85 | 0.59 | 4.00E-08 | 0.26    | NA |

|       |          |          |               |                 |       |      |      |          |       |    |
|-------|----------|----------|---------------|-----------------|-------|------|------|----------|-------|----|
| chr19 | 57018743 | 57019506 | ZNF471        | ENSG00000196263 | -88   | 0.15 | 0.47 | 5.30E-08 | -0.32 | NA |
| chr19 | 50353790 | 50355483 | PTOV1         | ENSG00000104960 | 498   | 0.25 | 0.13 | 6.00E-08 | 0.12  | NA |
| chr19 | 7745490  | 7747714  | TRAPPC5       | ENSG00000181029 | 841   | 0.62 | 0.39 | 9.80E-08 | 0.23  | NA |
| chr19 | 18118741 | 18119553 | ARRDC2        | ENSG00000105643 | 170   | 0.27 | 0.15 | 1.20E-07 | 0.12  | NA |
| chr19 | 1980824  | 1981088  | CSNK1G2       | ENSG00000133275 | 1965  | 0.96 | 0.43 | 1.50E-07 | 0.53  | NA |
| chr19 | 39881332 | 39882164 | PAF1          | ENSG00000006712 | -69   | 0.17 | 0.45 | 1.80E-07 | -0.28 | NA |
| chr19 | 10443688 | 10446022 | RAVER1        | ENSG00000161847 | -541  | 0.3  | 0.16 | 2.10E-07 | 0.14  | NA |
| chr19 | 18313348 | 18313577 | RAB3A         | ENSG00000105649 | 1360  | 0.6  | 0.31 | 4.50E-07 | 0.29  | NA |
| chr19 | 1439951  | 1440423  | RPS15         | ENSG00000115268 | 1824  | 0.9  | 0.7  | 5.70E-07 | 0.2   | NA |
| chr19 | 40871617 | 40871824 | PLD3          | ENSG00000105223 | -82   | 0.88 | 0.1  | 7.10E-07 | 0.78  | NA |
| chr19 | 811904   | 813824   | MIR3187       | ENSG00000129951 | 1885  | 0.98 | 0.93 | 8.80E-07 | 0.05  | NA |
| chr19 | 7953280  | 7953708  | LRRC8E        | ENSG00000171017 | 104   | 0.42 | 0.21 | 1.00E-06 | 0.21  | NA |
| chr19 | 14529731 | 14530505 | DDX39A        | ENSG00000123136 | -212  | 0.27 | 0.11 | 1.10E-06 | 0.16  | NA |
| chr19 | 17982670 | 17983821 | SLC5A5        | ENSG00000105641 | 463   | 0.38 | 0.6  | 1.20E-06 | -0.22 | NA |
| chr19 | 56156312 | 56156543 | ZNF581        | ENSG00000171425 | 1441  | 0.83 | 0.52 | 1.30E-06 | 0.31  | NA |
| chr19 | 1863841  | 1864942  | KLF16         | ENSG00000129911 | -827  | 0.32 | 0.18 | 1.40E-06 | 0.13  | NA |
| chr19 | 39694476 | 39694994 | SYCN          | ENSG00000179751 | 171   | 0.61 | 0.33 | 4.10E-06 | 0.28  | NA |
| chr19 | 58728277 | 58728729 | CTD-3138B18.1 | ENSG00000213013 | 957   | 0.68 | 0.51 | 4.20E-06 | 0.17  | NA |
| chr19 | 407011   | 409511   | C2CD4C        | ENSG00000183186 | 909   | 0.36 | 0.5  | 5.10E-06 | -0.13 | NA |
| chr19 | 45596086 | 45596871 | LRRC68        | ENSG00000104866 | 260   | 0.13 | 0.29 | 6.10E-06 | -0.16 | NA |
| chr19 | 4402483  | 4403091  | CHAF1A        | ENSG00000167670 | 128   | 0.41 | 0.13 | 6.40E-06 | 0.28  | NA |
| chr19 | 57741955 | 57742457 | AURKC         | ENSG00000105146 | -171  | 0.93 | 0.69 | 6.60E-06 | 0.24  | NA |
| chr19 | 4044917  | 4045154  | AC016586.1    | ENSG00000205147 | -1881 | 0.43 | 0.89 | 7.10E-06 | -0.46 | NA |
| chr19 | 38746638 | 38747379 | PPP1R14A      | ENSG00000167641 | 164   | 0.45 | 0.28 | 7.40E-06 | 0.17  | NA |
| chr19 | 38865263 | 38865733 | PSMD8         | ENSG00000099341 | 322   | 0.15 | 0.34 | 7.90E-06 | -0.19 | NA |
| chr19 | 41106058 | 41106415 | LTBP4         | ENSG00000090006 | -1041 | 0.26 | 0.53 | 8.20E-06 | -0.27 | NA |
| chr19 | 41256317 | 41257234 | C19orf54      | ENSG00000188493 | -378  | 0.27 | 0.14 | 1.10E-05 | 0.13  | NA |
| chr19 | 58816527 | 58817018 | ERVK3-1       | ENSG00000142396 | 57    | 0.48 | 0.2  | 1.10E-05 | 0.29  | NA |
| chr19 | 40729087 | 40729430 | CNTD2         | ENSG00000105219 | 1586  | 0.45 | 0.65 | 1.30E-05 | -0.2  | NA |
| chr19 | 47922251 | 47922777 | MEIS3         | ENSG00000105419 | 271   | 0.39 | 0.14 | 1.70E-05 | 0.25  | NA |



|       |          |          |            |                 |       |      |      |          |       |    |
|-------|----------|----------|------------|-----------------|-------|------|------|----------|-------|----|
| chr19 | 36246328 | 36247982 | HSPB6      | ENSG00000004776 | 770   | 0.74 | 0.62 | 1.80E-05 | 0.12  | NA |
| chr19 | 2095395  | 2095727  | MOBK2A     | ENSG00000172081 | 708   | 0.52 | 0.27 | 2.10E-05 | 0.25  | NA |
| chr19 | 3611794  | 3613658  | C19orf29OS | ENSG00000226800 | 1160  | 0.94 | 0.87 | 2.20E-05 | 0.076 | NA |
| chr19 | 10981486 | 10983266 | CARM1      | ENSG00000142453 | 123   | 0.26 | 0.15 | 2.40E-05 | 0.11  | NA |
| chr19 | 35323531 | 35323952 | AC008555.3 | ENSG00000222766 | 1587  | 0.88 | 0.68 | 2.50E-05 | 0.19  | NA |
| chr19 | 41630485 | 41630794 | CYP2F1     | ENSG00000197446 | 16    | 0.83 | 0.98 | 2.70E-05 | -0.15 | NA |
| chr19 | 1490134  | 1491806  | PCSK4      | ENSG00000115257 | -629  | 0.28 | 0.17 | 3.00E-05 | 0.11  | NA |
| chr19 | 2307566  | 2308092  | LINGO3     | ENSG00000220008 | 327   | 0.49 | 0.27 | 3.90E-05 | 0.22  | NA |
| chr19 | 12767749 | 12767980 | MAN2B1     | ENSG00000104774 | 185   | 0.88 | 0.66 | 4.00E-05 | 0.22  | NA |
| chr19 | 19639552 | 19639788 | YJEFN3     | ENSG00000250067 | 0     | 0.39 | 0.12 | 4.00E-05 | 0.27  | NA |
| chr19 | 48965002 | 48965792 | KCNJ14     | ENSG00000182324 | 891   | 0.96 | 0.77 | 4.10E-05 | 0.19  | NA |
| chr19 | 58570393 | 58571779 | ZNF135     | ENSG00000176293 | 479   | 0.46 | 0.34 | 5.20E-05 | 0.13  | NA |
| chr19 | 4639218  | 4639750  | TNFAIP8L1  | ENSG00000185361 | -43   | 0.3  | 0.12 | 5.60E-05 | 0.19  | NA |
| chr19 | 16770636 | 16772632 | C19orf42   | ENSG00000214046 | -711  | 0.3  | 0.17 | 7.10E-05 | 0.13  | NA |
| chr19 | 1241619  | 1242569  | ATP5D      | ENSG00000099624 | 345   | 0.3  | 0.19 | 7.70E-05 | 0.11  | NA |
| chr19 | 5822284  | 5822532  | NRTN       | ENSG00000171119 | -1410 | 0.18 | 0.49 | 8.40E-05 | -0.32 | NA |
| chr19 | 18266882 | 18266889 | PIK3R2     | ENSG00000105647 | 353   | 0.93 | 0.68 | 8.80E-05 | 0.24  | NA |
| chr19 | 3358495  | 3361248  | NFIC       | ENSG00000141905 | 255   | 0.24 | 0.16 | 0.00012  | 0.079 | NA |
| chr19 | 10397603 | 10398703 | ICAM4      | ENSG00000105371 | 503   | 0.33 | 0.22 | 0.00013  | 0.11  | NA |
| chr19 | 12865419 | 12865825 | BEST2      | ENSG00000039987 | -1051 | 0.8  | 0.38 | 0.00013  | 0.42  | NA |
| chr19 | 13875044 | 13875951 | MRI1       | ENSG00000037757 | 160   | 0.29 | 0.12 | 0.00014  | 0.16  | NA |
| chr19 | 49140156 | 49141131 | DBP        | ENSG00000105516 | -4    | 0.34 | 0.08 | 0.00014  | 0.26  | NA |
| chr19 | 38876070 | 38876332 | GGN        | ENSG00000179168 | 1700  | 0.96 | 0.65 | 0.00015  | 0.31  | NA |
| chr19 | 55673460 | 55673663 | C19orf51   | ENSG00000167646 | -126  | 0.65 | 0.15 | 0.00015  | 0.5   | NA |
| chr19 | 16178396 | 16178609 | TPM4       | ENSG00000167460 | 154   | 0.84 | 0.49 | 0.00016  | 0.35  | NA |
| chr19 | 3586742  | 3587104  | AC116968.1 | ENSG00000256059 | 1354  | 0.94 | 0.39 | 0.00019  | 0.55  | NA |
| chr19 | 9879152  | 9879736  | ZNF846     | ENSG00000196605 | -34   | 0.29 | 0.14 | 0.00019  | 0.15  | NA |
| chr19 | 10529627 | 10532004 | PDE4A      | ENSG00000065989 | -518  | 0.27 | 0.18 | 0.00021  | 0.088 | NA |
| chr19 | 11493484 | 11494363 | EPOR       | ENSG00000187266 | 1095  | 0.37 | 0.18 | 0.00022  | 0.2   | NA |
| chr19 | 47910107 | 47910563 | MEIS3      | ENSG00000105419 | 814   | 0.96 | 0.74 | 0.00022  | 0.21  | NA |

|       |          |          |            |                 |      |      |      |          |       |    |
|-------|----------|----------|------------|-----------------|------|------|------|----------|-------|----|
| chr19 | 42724190 | 42724665 | ZNF526     | ENSG00000167625 | -21  | 0.13 | 1    | 0.00023  | -0.87 | NA |
| chr19 | 4669927  | 4670528  | C19orf10   | ENSG00000074842 | 188  | 0.3  | 0.17 | 0.00024  | 0.14  | NA |
| chr19 | 13905810 | 13906649 | ZSWIM4     | ENSG00000132003 | -45  | 0.42 | 0.22 | 0.00024  | 0.2   | NA |
| chr19 | 13029794 | 13030355 | SYCE2      | ENSG00000161860 | 2    | 0.61 | 0.3  | 0.00025  | 0.31  | NA |
| chr19 | 14196244 | 14196706 | C19orf67   | ENSG00000188032 | 99   | 0.84 | 0.67 | 0.00025  | 0.18  | NA |
| chr19 | 57630339 | 57630633 | USP29      | ENSG00000131864 | -925 | 0.79 | 0.62 | 0.00026  | 0.17  | NA |
| chr19 | 17931951 | 17932370 | INSL3      | ENSG00000248099 | 160  | 0.5  | 0.74 | 0.00028  | -0.24 | NA |
| chr19 | 49561094 | 49561620 | CGB7       | ENSG00000196337 | 760  | 0.34 | 0.7  | 0.00028  | -0.36 | NA |
| chr19 | 10230162 | 10230682 | EIF3G      | ENSG00000130811 | 177  | 0.29 | 0.13 | 3.00E-04 | 0.15  | NA |
| chr19 | 40950025 | 40950777 | SERTAD3    | ENSG00000167565 | -119 | 0.36 | 0.17 | 3.00E-04 | 0.19  | NA |
| chr19 | 42746314 | 42747318 | GSK3A      | ENSG00000105723 | -71  | 0.32 | 0.18 | 0.00031  | 0.14  | NA |
| chr19 | 1523705  | 1524565  | PLK5P      | ENSG00000185988 | -3   | 0.28 | 0.17 | 0.00035  | 0.11  | NA |
| chr19 | 19029924 | 19030653 | COPE       | ENSG00000105669 | -91  | 0.26 | 0.52 | 0.00035  | -0.26 | NA |
| chr19 | 10399844 | 10405375 | ICAM5      | ENSG00000105376 | 1954 | 0.3  | 0.24 | 0.00039  | 0.064 | NA |
| chr19 | 5339640  | 5341061  | PTPRS      | ENSG00000105426 | 464  | 0.27 | 0.16 | 0.00041  | 0.11  | NA |
| chr19 | 56089679 | 56090859 | ZNF579     | ENSG00000218891 | 1942 | 0.93 | 0.85 | 0.00046  | 0.081 | NA |
| chr19 | 15442261 | 15443077 | BRD4       | ENSG00000141867 | 687  | 0.28 | 0.16 | 0.00047  | 0.12  | NA |
| chr19 | 50249492 | 50249894 | TSKS       | ENSG00000126467 | 773  | 0.56 | 0.36 | 0.00048  | 0.21  | NA |
| chr19 | 32895975 | 32897233 | AC007773.1 | ENSG00000249530 | -159 | 0.25 | 0.16 | 0.00049  | 0.092 | NA |
| chr19 | 58193268 | 58193638 | ZNF551     | ENSG00000204519 | 96   | 0.11 | 0.34 | 0.00049  | -0.23 | NA |
| chr19 | 10679134 | 10680036 | CDKN2D     | ENSG00000129355 | 46   | 0.38 | 0.24 | 0.00051  | 0.14  | NA |
| chr19 | 58897721 | 58898878 | RPS5       | ENSG00000083845 | -337 | 0.34 | 0.18 | 0.00053  | 0.16  | NA |
| chr19 | 3585357  | 3585947  | GIPC3      | ENSG00000179855 | 101  | 0.34 | 0.2  | 0.00061  | 0.14  | NA |
| chr19 | 13988204 | 13988559 | NANOS3     | ENSG00000187556 | 318  | 0.62 | 0.88 | 0.00062  | -0.25 | NA |
| chr19 | 54040812 | 54041857 | ZNF331     | ENSG00000130844 | 395  | 0.43 | 0.73 | 0.00066  | -0.3  | NA |
| chr19 | 6767945  | 6768160  | SH2D3A     | ENSG00000125731 | -529 | 0.59 | 0.29 | 0.00069  | 0.3   | NA |
| chr19 | 39897241 | 39898942 | ZFP36      | ENSG00000128016 | 604  | 0.4  | 0.28 | 0.00073  | 0.12  | NA |
| chr19 | 1354420  | 1355350  | MUM1       | ENSG00000160953 | -119 | 0.22 | 0.34 | 0.00074  | -0.12 | NA |
| chr19 | 3006273  | 3006721  | TLE2       | ENSG00000065717 | 61   | 0.97 | 0.81 | 0.00087  | 0.16  | NA |
| chr19 | 36523391 | 36523887 | CLIP3      | ENSG00000105270 | -81  | 0.33 | 0.12 | 0.00087  | 0.21  | NA |

|       |          |          |             |                 |       |      |      |         |        |    |
|-------|----------|----------|-------------|-----------------|-------|------|------|---------|--------|----|
| chr19 | 29218001 | 29218733 | AC005394.1  | ENSG00000250689 | 220   | 0.27 | 0.17 | 0.00091 | 0.11   | NA |
| chr19 | 8578661  | 8579219  | ZNF414      | ENSG00000133250 | 108   | 0.29 | 0.16 | 0.00093 | 0.13   | NA |
| chr19 | 1070985  | 1071812  | HMHA1       | ENSG00000180448 | 178   | 0.41 | 0.27 | 0.00095 | 0.14   | NA |
| chr19 | 1265854  | 1269943  | CIRBP       | ENSG00000099622 | -1369 | 0.27 | 0.22 | 0.00095 | 0.056  | NA |
| chr19 | 2900329  | 2901203  | ZNF57       | ENSG00000171970 | -130  | 0.27 | 0.16 | 0.00095 | 0.11   | NA |
| chr19 | 639565   | 640370   | FGF22       | ENSG00000070388 | 41    | 0.19 | 0.3  | 0.0011  | -0.11  | NA |
| chr19 | 55769269 | 55770875 | PPP6R1      | ENSG00000105063 | -34   | 0.24 | 0.16 | 0.0011  | 0.082  | NA |
| chr19 | 911689   | 911996   | C19orf22    | ENSG00000198858 | 1383  | 0.9  | 0.73 | 0.0012  | 0.17   | NA |
| chr19 | 12758273 | 12758754 | MAN2B1      | ENSG00000104774 | -115  | 0.55 | 0.29 | 0.0012  | 0.26   | NA |
| chr19 | 54982388 | 54982897 | CDC42EP5    | ENSG00000167617 | 1676  | 0.33 | 0.18 | 0.0012  | 0.15   | NA |
| chr19 | 5338788  | 5339130  | PTPRS       | ENSG00000105426 | 1855  | 0.44 | 0.2  | 0.0013  | 0.24   | NA |
| chr19 | 54960191 | 54960948 | AC008746.11 | ENSG00000226696 | -377  | 0.23 | 0.13 | 0.0013  | 0.097  | NA |
| chr19 | 8554998  | 8555251  | PRAM1       | ENSG00000133246 | 1783  | 0.83 | 0.66 | 0.0014  | 0.17   | NA |
| chr19 | 19648134 | 19649390 | CILP2       | ENSG00000160161 | -312  | 0.35 | 0.22 | 0.0014  | 0.13   | NA |
| chr19 | 49223054 | 49223312 | MAMSTR      | ENSG00000176909 | -205  | 0.95 | 0.76 | 0.0014  | 0.19   | NA |
| chr19 | 50934904 | 50935677 | MYBPC2      | ENSG00000086967 | -870  | 0.41 | 0.22 | 0.0014  | 0.19   | NA |
| chr19 | 54382664 | 54382951 | PRKCG       | ENSG00000126583 | 363   | 0.32 | 0.16 | 0.0014  | 0.15   | NA |
| chr19 | 36248979 | 36249307 | C19orf55    | ENSG00000167595 | 99    | 0.36 | 0.12 | 0.0015  | 0.25   | NA |
| chr19 | 1063544  | 1064265  | ABCA7       | ENSG00000064687 | -147  | 0.91 | 0.76 | 0.0017  | 0.15   | NA |
| chr19 | 18343496 | 18344196 | PDE4C       | ENSG00000105650 | 635   | 0.33 | 0.2  | 0.0017  | 0.13   | NA |
| chr19 | 12551471 | 12551877 | ZNF443      | ENSG00000180855 | 89    | 0.52 | 0.19 | 0.0019  | 0.33   | NA |
| chr19 | 18451292 | 18451791 | PGPEP1      | ENSG00000130517 | 133   | 0.17 | 0.31 | 0.0019  | -0.14  | NA |
| chr19 | 46288988 | 46289934 | DMWD        | ENSG00000185800 | -544  | 0.88 | 0.79 | 0.0019  | 0.088  | NA |
| chr19 | 54693034 | 54695497 | MBOAT7      | ENSG00000125505 | -1119 | 0.25 | 0.17 | 0.0019  | 0.08   | NA |
| chr19 | 18390360 | 18392734 | JUND        | ENSG00000130522 | 885   | 0.17 | 0.25 | 0.0021  | -0.087 | NA |
| chr19 | 52511228 | 52511582 | ZNF615      | ENSG00000197619 | 53    | 0.09 | 0.5  | 0.0021  | -0.41  | NA |
| chr19 | 50093657 | 50095507 | PRR12       | ENSG00000126464 | -330  | 0.25 | 0.4  | 0.0022  | -0.14  | NA |
| chr19 | 10764244 | 10765807 | ILF3        | ENSG00000129351 | 88    | 0.31 | 0.19 | 0.0025  | 0.12   | NA |
| chr19 | 52598480 | 52599238 | ZNF841      | ENSG00000197608 | 159   | 0.3  | 0.14 | 0.0025  | 0.16   | NA |
| chr19 | 7598413  | 7601008  | PNPLA6      | ENSG00000032444 | 672   | 0.22 | 0.16 | 0.0026  | 0.06   | NA |

|       |          |          |            |                 |      |      |      |        |       |    |
|-------|----------|----------|------------|-----------------|------|------|------|--------|-------|----|
| chr19 | 19006031 | 19007546 | GDF1       | ENSG00000130283 | 165  | 0.26 | 0.15 | 0.0026 | 0.11  | NA |
| chr19 | 34895152 | 34895812 | PDCD2L     | ENSG00000126249 | 179  | 0.14 | 0.35 | 0.0026 | -0.2  | NA |
| chr19 | 58609338 | 58609988 | ZSCAN18    | ENSG00000121413 | 67   | 0.16 | 0.25 | 0.0027 | -0.09 | NA |
| chr19 | 1591998  | 1593095  | MBD3       | ENSG00000071655 | 106  | 0.25 | 0.17 | 0.0033 | 0.079 | NA |
| chr19 | 47776370 | 47778740 | AC008532.1 | ENSG00000257704 | -155 | 0.26 | 0.17 | 0.0035 | 0.095 | NA |
| chr19 | 7938332  | 7939779  | AC010336.1 | ENSG00000183248 | 271  | 0.3  | 0.19 | 0.004  | 0.11  | NA |
| chr19 | 54618652 | 54619167 | TFPT       | ENSG00000105619 | -244 | 0.37 | 0.11 | 0.004  | 0.26  | NA |
| chr19 | 12902107 | 12904954 | JUNB       | ENSG00000171223 | 1220 | 0.23 | 0.18 | 0.0041 | 0.053 | NA |
| chr19 | 13885180 | 13885793 | C19orf53   | ENSG00000104979 | 229  | 0.34 | 0.19 | 0.0041 | 0.16  | NA |
| chr19 | 17420717 | 17420939 | DDA1       | ENSG00000130311 | 491  | 0.25 | 0.1  | 0.0042 | 0.14  | NA |
| chr19 | 33165266 | 33168099 | ANKRD27    | ENSG00000105186 | -580 | 0.27 | 0.2  | 0.0043 | 0.064 | NA |
| chr19 | 1287416  | 1287885  | EFNA2      | ENSG00000099617 | 1482 | 0.7  | 0.49 | 0.0044 | 0.22  | NA |
| chr19 | 42599507 | 42600522 | POU2F2     | ENSG00000028277 | -457 | 0.86 | 0.72 | 0.0045 | 0.14  | NA |
| chr19 | 5455481  | 5456262  | ZNRF4      | ENSG00000105428 | 445  | 0.95 | 0.89 | 0.0047 | 0.068 | NA |
| chr19 | 40006098 | 40006626 | AC011500.1 | ENSG00000186838 | 609  | 0.31 | 0.17 | 0.0047 | 0.14  | NA |
| chr19 | 16222112 | 16223152 | RAB8A      | ENSG00000167461 | 142  | 0.26 | 0.14 | 0.0048 | 0.12  | NA |
| chr19 | 33555246 | 33556431 | RHPN2      | ENSG00000131941 | -44  | 0.3  | 0.19 | 0.0049 | 0.11  | NA |
| chr19 | 55672023 | 55673212 | C19orf51   | ENSG00000167646 | -590 | 0.38 | 0.24 | 0.005  | 0.14  | NA |
| chr19 | 12758975 | 12759210 | MAN2B1     | ENSG00000104774 | -605 | 0.6  | 0.32 | 0.0051 | 0.28  | NA |
| chr19 | 16186789 | 16188275 | TPM4       | ENSG00000167460 | 397  | 0.25 | 0.16 | 0.0051 | 0.09  | NA |
| chr19 | 796506   | 798936   | PTBP1      | ENSG00000011304 | 329  | 0.24 | 0.15 | 0.0052 | 0.086 | NA |
| chr19 | 33462715 | 33463308 | CEP89      | ENSG00000121289 | -142 | 0.16 | 0.28 | 0.0052 | -0.12 | NA |
| chr19 | 53289642 | 53290212 | ZNF600     | ENSG00000189190 | 107  | 0.33 | 0.2  | 0.0053 | 0.14  | NA |
| chr19 | 57351283 | 57351995 | ZIM2       | ENSG00000198300 | 455  | 0.66 | 0.49 | 0.0053 | 0.18  | NA |
| chr19 | 44576116 | 44576564 | ZNF284     | ENSG00000186026 | 43   | 0.37 | 0.18 | 0.0058 | 0.19  | NA |
| chr19 | 56154041 | 56154405 | ZNF580     | ENSG00000213015 | 760  | 0.28 | 0.17 | 0.0058 | 0.11  | NA |
| chr19 | 16682657 | 16683792 | SLC35E1    | ENSG00000127526 | -237 | 0.21 | 0.15 | 0.0059 | 0.062 | NA |
| chr19 | 1438287  | 1438869  | RPS15      | ENSG00000115268 | 215  | 0.26 | 0.14 | 0.0064 | 0.11  | NA |
| chr19 | 21265164 | 21265433 | ZNF714     | ENSG00000160352 | 287  | 0.18 | 0.42 | 0.0065 | -0.25 | NA |
| chr19 | 41220886 | 41221205 | ADCK4      | ENSG00000123815 | -67  | 0.37 | 0.15 | 0.0065 | 0.23  | NA |

|       |          |          |            |                 |       |      |      |        |        |    |
|-------|----------|----------|------------|-----------------|-------|------|------|--------|--------|----|
| chr19 | 13215244 | 13215543 | LYL1       | ENSG00000104903 | -1712 | 0.55 | 0.37 | 0.0069 | 0.18   | NA |
| chr19 | 19371675 | 19372393 | HAPLN4     | ENSG00000187664 | 1562  | 0.58 | 0.39 | 0.0071 | 0.2    | NA |
| chr19 | 40022952 | 40023667 | EID2B      | ENSG00000176401 | 185   | 0.28 | 0.17 | 0.0072 | 0.11   | NA |
| chr19 | 375830   | 376094   | THEG       | ENSG00000105549 | 8     | 0.73 | 0.91 | 0.0073 | -0.18  | NA |
| chr19 | 9731734  | 9731994  | ZNF561     | ENSG00000171469 | 0     | 0.31 | 0.17 | 0.0073 | 0.14   | NA |
| chr19 | 42348675 | 42348920 | LYPD4      | ENSG00000183103 | -61   | 0.63 | 0.77 | 0.0076 | -0.14  | NA |
| chr19 | 55857600 | 55858055 | SUV420H2   | ENSG00000133247 | 386   | 0.84 | 0.66 | 0.0076 | 0.18   | NA |
| chr19 | 49559222 | 49560497 | CGB7       | ENSG00000196337 | -862  | 0.27 | 0.17 | 0.0077 | 0.11   | NA |
| chr19 | 37063892 | 37064749 | AC092295.7 | ENSG00000233527 | 348   | 0.23 | 0.39 | 0.0078 | -0.16  | NA |
| chr19 | 7794793  | 7796410  | CLEC4G     | ENSG00000182566 | 1456  | 0.42 | 0.3  | 0.008  | 0.12   | NA |
| chr19 | 5903482  | 5905216  | NDUFA11    | ENSG00000174886 | -570  | 0.24 | 0.33 | 0.0081 | -0.094 | NA |
| chr19 | 12885756 | 12886519 | HOOK2      | ENSG00000095066 | 297   | 0.37 | 0.18 | 0.0081 | 0.19   | NA |
| chr19 | 38826303 | 38826573 | CATSPERG   | ENSG00000099338 | 23    | 0.34 | 0.11 | 0.0081 | 0.23   | NA |
| chr19 | 42363678 | 42364765 | RPS19      | ENSG00000105372 | 233   | 0.26 | 0.18 | 0.0081 | 0.083  | NA |
| chr19 | 18898228 | 18898449 | COMP       | ENSG00000105664 | -494  | 0.29 | 0.45 | 0.0082 | -0.16  | NA |
| chr19 | 38713166 | 38713458 | DPF1       | ENSG00000011332 | 501   | 0.93 | 0.77 | 0.0084 | 0.16   | NA |
| chr19 | 45970799 | 45972668 | FOSB       | ENSG00000125740 | 480   | 0.25 | 0.18 | 0.0087 | 0.073  | NA |
| chr19 | 57049675 | 57050646 | ZFP28      | ENSG00000196867 | -157  | 0.24 | 0.17 | 0.0087 | 0.078  | NA |
| chr19 | 35633847 | 35634629 | FXYD7      | ENSG00000221946 | 84    | 0.38 | 0.18 | 0.0088 | 0.2    | NA |
| chr19 | 41903114 | 41903361 | EXOSC5     | ENSG00000077348 | 19    | 0.17 | 0.37 | 0.0091 | -0.2   | NA |
| chr19 | 49457926 | 49458493 | BAX        | ENSG00000087088 | 137   | 0.3  | 0.2  | 0.0091 | 0.1    | NA |
| chr19 | 10513990 | 10515616 | MIR1181    | ENSG00000221566 | -589  | 0.34 | 0.23 | 0.0093 | 0.12   | NA |
| chr19 | 10627980 | 10628417 | S1PR5      | ENSG00000180739 | -72   | 0.38 | 0.24 | 0.0093 | 0.14   | NA |
| chr19 | 39217530 | 39217857 | ACTN4      | ENSG00000130402 | -803  | 0.65 | 1    | 0.0095 | -0.35  | NA |
| chr19 | 2235681  | 2237102  | PLEKHJ1    | ENSG00000104886 | -72   | 0.15 | 0.22 | 0.0099 | -0.073 | NA |
| chr19 | 10735999 | 10736396 | SLC44A2    | ENSG00000129353 | 26    | 0.37 | 0.16 | 0.01   | 0.21   | NA |
| chr19 | 18043480 | 18044143 | CCDC124    | ENSG00000007080 | -13   | 0.16 | 0.31 | 0.01   | -0.15  | NA |
| chr19 | 58094739 | 58095764 | ZIK1       | ENSG00000171649 | -257  | 0.14 | 0.25 | 0.01   | -0.1   | NA |
| chr19 | 39421063 | 39421615 | MRPS12     | ENSG00000128626 | -9    | 0.32 | 0.53 | 0.011  | -0.21  | NA |
| chr19 | 49116245 | 49116641 | FAM83E     | ENSG00000105523 | 251   | 0.26 | 0.1  | 0.011  | 0.16   | NA |

|       |          |          |            |                 |      |      |      |       |        |    |
|-------|----------|----------|------------|-----------------|------|------|------|-------|--------|----|
| chr19 | 54641071 | 54642325 | CNOT3      | ENSG00000088038 | 254  | 0.34 | 0.19 | 0.011 | 0.15   | NA |
| chr19 | 55850495 | 55851493 | SUV420H2   | ENSG00000133247 | -227 | 0.17 | 0.33 | 0.011 | -0.17  | NA |
| chr19 | 35224920 | 35225316 | ZNF181     | ENSG00000197841 | 57   | 0.28 | 0.16 | 0.012 | 0.12   | NA |
| chr19 | 35842430 | 35843187 | FFAR1      | ENSG00000126266 | 363  | 0.89 | 0.95 | 0.012 | -0.062 | NA |
| chr19 | 41354451 | 41354685 | CYP2A6     | ENSG00000255974 | 1784 | 0.33 | 0.15 | 0.012 | 0.18   | NA |
| chr19 | 56111498 | 56112063 | ZNF524     | ENSG00000171443 | 50   | 0.23 | 0.13 | 0.013 | 0.1    | NA |
| chr19 | 6425485  | 6425843  | KHSRP      | ENSG00000088247 | -842 | 0.27 | 0.55 | 0.014 | -0.28  | NA |
| chr19 | 11590295 | 11593643 | ELAVL3     | ENSG00000196361 | -166 | 0.26 | 0.2  | 0.014 | 0.06   | NA |
| chr19 | 46996327 | 46998437 | AC011484.1 | ENSG00000204850 | -383 | 0.72 | 0.66 | 0.014 | 0.062  | NA |
| chr19 | 57791462 | 57792223 | ZNF460     | ENSG00000197714 | -11  | 0.15 | 0.29 | 0.014 | -0.14  | NA |
| chr19 | 917034   | 920787   | KISS1R     | ENSG00000116014 | 1568 | 0.27 | 0.21 | 0.015 | 0.059  | NA |
| chr19 | 12844998 | 12845664 | C19orf43   | ENSG00000123144 | 198  | 0.32 | 0.15 | 0.015 | 0.17   | NA |
| chr19 | 6590340  | 6591072  | CD70       | ENSG00000125726 | 419  | 0.36 | 0.23 | 0.015 | 0.12   | NA |
| chr19 | 17958490 | 17958808 | JAK3       | ENSG00000105639 | 151  | 0.3  | 0.71 | 0.015 | -0.41  | NA |
| chr19 | 36604359 | 36606906 | TBCB       | ENSG00000105254 | -256 | 0.4  | 0.32 | 0.015 | 0.085  | NA |
| chr19 | 42720826 | 42722132 | DEDD2      | ENSG00000160570 | 334  | 0.28 | 0.2  | 0.015 | 0.078  | NA |
| chr19 | 54605985 | 54606590 | OSCAR      | ENSG00000170909 | -287 | 0.27 | 1    | 0.015 | -0.73  | NA |
| chr19 | 58427621 | 58428054 | ZNF417     | ENSG00000173480 | 108  | 0.33 | 0.16 | 0.015 | 0.17   | NA |
| chr19 | 8563441  | 8564225  | PRAM1      | ENSG00000133246 | 723  | 0.75 | 0.86 | 0.016 | -0.11  | NA |
| chr19 | 42386865 | 42387485 | ARHGEF1    | ENSG00000076928 | -92  | 0.25 | 0.15 | 0.016 | 0.094  | NA |
| chr19 | 12624273 | 12624477 | ZNF709     | ENSG00000242852 | 272  | 0.54 | 0.82 | 0.017 | -0.27  | NA |
| chr19 | 15217951 | 15218617 | SYDE1      | ENSG00000105137 | 70   | 0.32 | 0.23 | 0.017 | 0.091  | NA |
| chr19 | 34919127 | 34919960 | UBA2       | ENSG00000126261 | 279  | 0.3  | 0.2  | 0.017 | 0.1    | NA |
| chr19 | 57078365 | 57079301 | AC005498.1 | ENSG00000245443 | -59  | 0.27 | 0.16 | 0.017 | 0.1    | NA |
| chr19 | 58694501 | 58695107 | ZNF274     | ENSG00000171606 | 408  | 0.25 | 0.16 | 0.017 | 0.088  | NA |
| chr19 | 47290585 | 47291983 | SLC1A5     | ENSG00000105281 | 558  | 0.28 | 0.2  | 0.018 | 0.074  | NA |
| chr19 | 1815700  | 1816784  | MIR1909    | ENSG00000223244 | -5   | 0.9  | 0.83 | 0.019 | 0.071  | NA |
| chr19 | 17445072 | 17445807 | ANO8       | ENSG00000074855 | 199  | 0.25 | 0.16 | 0.019 | 0.087  | NA |
| chr19 | 57751888 | 57752286 | ZNF805     | ENSG00000204524 | 114  | 0.16 | 0.31 | 0.019 | -0.15  | NA |
| chr19 | 7852932  | 7854557  | CLEC4GP1   | ENSG00000248217 | 1374 | 0.27 | 0.17 | 0.02  | 0.096  | NA |

|       |          |          |            |                 |       |      |      |       |        |    |
|-------|----------|----------|------------|-----------------|-------|------|------|-------|--------|----|
| chr19 | 44008014 | 44008893 | PHLDB3     | ENSG00000176531 | 634   | 0.21 | 0.13 | 0.02  | 0.078  | NA |
| chr19 | 54057414 | 54058254 | ZNF331     | ENSG00000130844 | 50    | 0.55 | 0.44 | 0.02  | 0.12   | NA |
| chr19 | 54385315 | 54385604 | PRKCG      | ENSG00000126583 | 6     | 0.5  | 0.23 | 0.02  | 0.27   | NA |
| chr19 | 54668158 | 54668566 | TMC4       | ENSG00000167608 | 88    | 0.6  | 0.17 | 0.02  | 0.43   | NA |
| chr19 | 1000198  | 1000994  | GRIN3B     | ENSG00000116032 | 178   | 0.24 | 0.15 | 0.021 | 0.085  | NA |
| chr19 | 3626498  | 3627274  | C19orf29   | ENSG00000105298 | -126  | 0.17 | 0.11 | 0.022 | 0.058  | NA |
| chr19 | 10340776 | 10342254 | S1PR2      | ENSG00000175898 | 433   | 0.25 | 0.17 | 0.022 | 0.08   | NA |
| chr19 | 39687597 | 39687964 | NCCRP1     | ENSG00000188505 | 176   | 0.29 | 0.45 | 0.022 | -0.16  | NA |
| chr19 | 56631771 | 56633076 | ZNF787     | ENSG00000142409 | 226   | 0.22 | 0.17 | 0.022 | 0.053  | NA |
| chr19 | 50191330 | 50191559 | PRMT1      | ENSG00000126457 | 334   | 0.88 | 0.71 | 0.024 | 0.16   | NA |
| chr19 | 56879417 | 56879995 | ZNF542     | ENSG00000240225 | 238   | 0.26 | 0.16 | 0.024 | 0.1    | NA |
| chr19 | 49521087 | 49522241 | LHB        | ENSG00000104826 | -1317 | 0.28 | 0.2  | 0.025 | 0.078  | NA |
| chr19 | 38210107 | 38210692 | ZNF607     | ENSG00000198182 | 292   | 0.28 | 0.18 | 0.026 | 0.1    | NA |
| chr19 | 40971476 | 40973393 | BLVRB      | ENSG00000090013 | -709  | 0.19 | 0.13 | 0.026 | 0.065  | NA |
| chr19 | 17416304 | 17417253 | MRPL34     | ENSG00000130312 | 301   | 0.29 | 0.18 | 0.028 | 0.1    | NA |
| chr19 | 19843482 | 19843943 | ZNF14      | ENSG00000105708 | 209   | 0.26 | 0.15 | 0.028 | 0.12   | NA |
| chr19 | 49991240 | 49991518 | RPL13A     | ENSG00000142541 | 506   | 0.22 | 0.5  | 0.028 | -0.28  | NA |
| chr19 | 54684476 | 54684876 | MBOAT7     | ENSG00000125505 | -169  | 0.79 | 0.66 | 0.028 | 0.14   | NA |
| chr19 | 58070553 | 58071273 | AC003682.1 | ENSG00000251369 | 294   | 0.28 | 0.18 | 0.028 | 0.094  | NA |
| chr19 | 35738790 | 35740550 | LSR        | ENSG00000105699 | 111   | 0.29 | 0.22 | 0.029 | 0.07   | NA |
| chr19 | 10828657 | 10829340 | DNM2       | ENSG00000079805 | 269   | 0.22 | 0.34 | 0.03  | -0.12  | NA |
| chr19 | 36210687 | 36210926 | AD000671.1 | ENSG00000105663 | -998  | 0.79 | 0.92 | 0.03  | -0.13  | NA |
| chr19 | 2474610  | 2476828  | GADD45B    | ENSG00000099860 | -404  | 0.22 | 0.16 | 0.031 | 0.052  | NA |
| chr19 | 2819630  | 2820295  | ZNF554     | ENSG00000172006 | 90    | 0.28 | 0.15 | 0.032 | 0.13   | NA |
| chr19 | 4101029  | 4101515  | MAP2K2     | ENSG00000126934 | -595  | 0.9  | 0.97 | 0.032 | -0.074 | NA |
| chr19 | 45260352 | 45261809 | BCL3       | ENSG00000069399 | 234   | 0.3  | 0.23 | 0.032 | 0.061  | NA |
| chr19 | 12511608 | 12512144 | ZNF799     | ENSG00000196466 | -82   | 0.22 | 0.12 | 0.033 | 0.1    | NA |
| chr19 | 50666147 | 50666514 | IZUMO2     | ENSG00000161652 | 107   | 0.45 | 0.34 | 0.033 | 0.11   | NA |
| chr19 | 41816025 | 41816350 | CCDC97     | ENSG00000142039 | 93    | 0.26 | 0.46 | 0.034 | -0.21  | NA |
| chr19 | 39989397 | 39990140 | DLL3       | ENSG00000090932 | 211   | 0.25 | 0.17 | 0.035 | 0.086  | NA |

|       |          |          |          |                 |       |      |      |       |        |    |
|-------|----------|----------|----------|-----------------|-------|------|------|-------|--------|----|
| chr19 | 18335072 | 18337375 | PDE4C    | ENSG00000105650 | -920  | 0.25 | 0.2  | 0.036 | 0.048  | NA |
| chr19 | 36134153 | 36135781 | ETV2     | ENSG00000105672 | 1910  | 0.28 | 0.21 | 0.036 | 0.067  | NA |
| chr19 | 44716461 | 44716908 | ZNF227   | ENSG00000131115 | -7    | 0.21 | 0.44 | 0.036 | -0.24  | NA |
| chr19 | 51869400 | 51871587 | ETFB     | ENSG00000105379 | -821  | 0.27 | 0.19 | 0.036 | 0.086  | NA |
| chr19 | 56915356 | 56915856 | ZNF583   | ENSG00000198440 | 223   | 0.27 | 0.16 | 0.036 | 0.11   | NA |
| chr19 | 36485937 | 36486852 | SDHAF1   | ENSG00000205138 | 304   | 0.19 | 0.14 | 0.037 | 0.051  | NA |
| chr19 | 57182887 | 57183375 | ZNF835   | ENSG00000127903 | -8    | 0.3  | 0.2  | 0.037 | 0.096  | NA |
| chr19 | 709129   | 709990   | PALM     | ENSG00000099864 | 606   | 0.28 | 0.18 | 0.038 | 0.1    | NA |
| chr19 | 8397958  | 8400461  | KANK3    | ENSG00000186994 | -247  | 0.21 | 0.17 | 0.038 | 0.041  | NA |
| chr19 | 45647957 | 45648823 | LRRC68   | ENSG00000104866 | 0     | 0.9  | 0.96 | 0.038 | -0.06  | NA |
| chr19 | 45655293 | 45657246 | NKPD1    | ENSG00000179846 | 759   | 0.25 | 0.2  | 0.038 | 0.048  | NA |
| chr19 | 58144339 | 58144999 | ZNF211   | ENSG00000121417 | 133   | 0.27 | 0.17 | 0.038 | 0.098  | NA |
| chr19 | 2269115  | 2271364  | OAZ1     | ENSG00000104904 | 719   | 0.24 | 0.2  | 0.039 | 0.044  | NA |
| chr19 | 47522904 | 47525190 | NPAS1    | ENSG00000130751 | -96   | 0.25 | 0.2  | 0.039 | 0.056  | NA |
| chr19 | 1094797  | 1095649  | POLR2E   | ENSG00000099817 | 168   | 0.23 | 0.14 | 0.04  | 0.096  | NA |
| chr19 | 290594   | 292249   | PPAP2C   | ENSG00000141934 | -252  | 0.22 | 0.28 | 0.041 | -0.055 | NA |
| chr19 | 1068438  | 1068764  | HMHA1    | ENSG00000180448 | 999   | 0.87 | 0.7  | 0.041 | 0.17   | NA |
| chr19 | 11485286 | 11485769 | C19orf39 | ENSG00000173928 | 144   | 0.24 | 0.39 | 0.041 | -0.15  | NA |
| chr19 | 50713630 | 50714073 | MYH14    | ENSG00000105357 | 235   | 0.9  | 0.95 | 0.041 | -0.057 | NA |
| chr19 | 51221447 | 51222704 | SHANK1   | ENSG00000161681 | 632   | 0.24 | 0.18 | 0.041 | 0.061  | NA |
| chr19 | 7694095  | 7694597  | XAB2     | ENSG00000076924 | 93    | 0.2  | 0.31 | 0.043 | -0.11  | NA |
| chr19 | 12476049 | 12476372 | ZNF442   | ENSG00000198342 | 237   | 0.32 | 0.14 | 0.043 | 0.18   | NA |
| chr19 | 14116532 | 14118017 | RFX1     | ENSG00000132005 | -140  | 0.26 | 0.2  | 0.043 | 0.061  | NA |
| chr19 | 2807224  | 2808386  | THOP1    | ENSG00000172009 | -1721 | 0.9  | 0.96 | 0.044 | -0.062 | NA |
| chr19 | 33071875 | 33072808 | PDCD5    | ENSG00000105185 | 245   | 0.25 | 0.17 | 0.044 | 0.084  | NA |
| chr19 | 36360264 | 36360835 | APLP1    | ENSG00000105290 | 1148  | 0.31 | 0.17 | 0.044 | 0.14   | NA |
| chr19 | 662284   | 663337   | RNF126   | ENSG00000070423 | 374   | 0.25 | 0.18 | 0.045 | 0.065  | NA |
| chr19 | 1173240  | 1174343  | SBNO2    | ENSG00000064932 | 491   | 0.25 | 0.19 | 0.045 | 0.056  | NA |
| chr19 | 5567518  | 5567939  | PLAC2    | ENSG00000223573 | 317   | 0.62 | 0.31 | 0.045 | 0.31   | NA |
| chr19 | 58919548 | 58920529 | ZNF584   | ENSG00000171574 | -25   | 0.21 | 0.16 | 0.046 | 0.047  | NA |



|       |          |          |            |                 |       |      |      |       |        |    |
|-------|----------|----------|------------|-----------------|-------|------|------|-------|--------|----|
| chr19 | 7587271  | 7587825  | MCOLN1     | ENSG00000090674 | 52    | 0.38 | 0.26 | 0.047 | 0.11   | NA |
| chr19 | 36119899 | 36120274 | RBM42      | ENSG00000126254 | 106   | 0.18 | 0.27 | 0.047 | -0.085 | NA |
| chr19 | 46417528 | 46417745 | NANOS2     | ENSG00000188425 | 400   | 0.9  | 0.81 | 0.047 | 0.09   | NA |
| chr19 | 46850185 | 46850678 | PPP5C      | ENSG00000011485 | 180   | 0.17 | 0.31 | 0.047 | -0.14  | NA |
| chr19 | 56904636 | 56905355 | ZNF582     | ENSG00000018869 | -106  | 0.27 | 0.19 | 0.047 | 0.086  | NA |
| chr19 | 49946345 | 49947222 | SLC17A7    | ENSG00000104888 | -1166 | 0.25 | 0.12 | 0.048 | 0.13   | NA |
| chr19 | 50145078 | 50145764 | SCAF1      | ENSG00000126461 | 39    | 0.27 | 0.2  | 0.048 | 0.076  | NA |
| chr19 | 51611423 | 51612176 | CTU1       | ENSG00000142544 | -152  | 0.18 | 0.27 | 0.048 | -0.083 | NA |
| chr19 | 1103722  | 1105758  | GPX4       | ENSG00000167468 | 804   | 0.25 | 0.21 | 0.049 | 0.045  | NA |
| chr19 | 7991892  | 7992179  | CTXN1      | ENSG00000178531 | -984  | 0.77 | 0.63 | 0.049 | 0.14   | NA |
| chr19 | 18527651 | 18531118 | SSBP4      | ENSG00000130511 | -837  | 0.19 | 0.16 | 0.049 | 0.037  | NA |
| chr19 | 4182259  | 4182803  | SIRT6      | ENSG00000077463 | 8     | 0.27 | 0.2  | 0.05  | 0.068  | NA |
| chr19 | 40561820 | 40562150 | ZNF780B    | ENSG00000128000 | 127   | 0.24 | 0.36 | 0.051 | -0.11  | NA |
| chr19 | 46009778 | 46011060 | VASP       | ENSG00000125753 | -269  | 0.28 | 0.19 | 0.051 | 0.089  | NA |
| chr19 | 55591905 | 55593980 | EPS8L1     | ENSG00000131037 | 1182  | 0.24 | 0.3  | 0.051 | -0.064 | NA |
| chr19 | 2739851  | 2740393  | SLC39A3    | ENSG00000141873 | -107  | 0.29 | 0.17 | 0.052 | 0.11   | NA |
| chr19 | 10676267 | 10677064 | KRI1       | ENSG00000129347 | -18   | 0.19 | 0.13 | 0.052 | 0.065  | NA |
| chr19 | 1205368  | 1207422  | STK11      | ENSG00000118046 | 597   | 0.28 | 0.21 | 0.054 | 0.063  | NA |
| chr19 | 15342626 | 15343181 | EPHX3      | ENSG00000105131 | 328   | 0.61 | 0.37 | 0.054 | 0.24   | NA |
| chr19 | 30433004 | 30433865 | C19orf2    | ENSG00000105176 | 276   | 0.42 | 0.24 | 0.054 | 0.19   | NA |
| chr19 | 42579935 | 42580588 | ZNF574     | ENSG00000105732 | -29   | 0.29 | 0.18 | 0.054 | 0.11   | NA |
| chr19 | 58789914 | 58790972 | AC020915.1 | ENSG00000246051 | -269  | 0.3  | 0.22 | 0.055 | 0.079  | NA |
| chr19 | 1847689  | 1847893  | REXO1      | ENSG00000079313 | 661   | 0.26 | 0.16 | 0.056 | 0.1    | NA |
| chr19 | 8428965  | 8429492  | ANGPTL4    | ENSG00000167772 | 217   | 0.3  | 1    | 0.056 | -0.7   | NA |
| chr19 | 15947230 | 15947926 | AC004510.2 | ENSG00000248453 | 287   | 0.26 | 0.39 | 0.056 | -0.13  | NA |
| chr19 | 34286184 | 34289135 | KCTD15     | ENSG00000153885 | -92   | 0.24 | 0.2  | 0.056 | 0.04   | NA |
| chr19 | 48017717 | 48018782 | NAPA       | ENSG00000105402 | 248   | 0.25 | 0.18 | 0.056 | 0.068  | NA |
| chr19 | 19650683 | 19651274 | CILP2      | ENSG00000160161 | 1904  | 0.6  | 0.72 | 0.057 | -0.12  | NA |
| chr19 | 44098925 | 44099483 | IRGQ       | ENSG00000167378 | 1083  | 0.22 | 0.15 | 0.057 | 0.066  | NA |
| chr19 | 15235912 | 15236631 | ILVBL      | ENSG00000105135 | -98   | 0.32 | 0.22 | 0.058 | 0.091  | NA |

|       |          |          |            |                 |       |      |      |       |        |    |
|-------|----------|----------|------------|-----------------|-------|------|------|-------|--------|----|
| chr19 | 16296300 | 16296742 | FAM32A     | ENSG00000105058 | 286   | 0.3  | 0.18 | 0.058 | 0.13   | NA |
| chr19 | 35417701 | 35418217 | ZNF30      | ENSG00000168661 | 152   | 0.31 | 0.2  | 0.058 | 0.11   | NA |
| chr19 | 10526982 | 10527755 | PDE4A      | ENSG00000065989 | -81   | 0.24 | 0.14 | 0.059 | 0.1    | NA |
| chr19 | 11877720 | 11878280 | ZNF441     | ENSG00000197044 | 185   | 0.19 | 0.12 | 0.059 | 0.071  | NA |
| chr19 | 39804621 | 39805954 | LRFN1      | ENSG00000128011 | 689   | 0.97 | 0.94 | 0.059 | 0.027  | NA |
| chr19 | 45542202 | 45542711 | CLASRP     | ENSG00000104859 | 158   | 0.14 | 0.24 | 0.059 | -0.099 | NA |
| chr19 | 37328896 | 37329518 | ZNF790     | ENSG00000197863 | -278  | 0.37 | 0.22 | 0.06  | 0.15   | NA |
| chr19 | 48824529 | 48825493 | CCDC114    | ENSG00000105479 | 119   | 0.27 | 0.21 | 0.06  | 0.06   | NA |
| chr19 | 39339923 | 39343257 | HNRNPL     | ENSG00000104824 | -1014 | 0.25 | 0.2  | 0.061 | 0.05   | NA |
| chr19 | 46366202 | 46366605 | SYMPK      | ENSG00000125755 | 2     | 0.17 | 0.29 | 0.061 | -0.12  | NA |
| chr19 | 1555539  | 1556866  | AC027307.1 | ENSG00000222720 | -402  | 0.97 | 0.95 | 0.062 | 0.022  | NA |
| chr19 | 3572545  | 3574626  | HMG20B     | ENSG00000064961 | 810   | 0.42 | 0.36 | 0.062 | 0.054  | NA |
| chr19 | 3762655  | 3763109  | MRPL54     | ENSG00000183617 | 217   | 0.23 | 0.37 | 0.062 | -0.14  | NA |
| chr19 | 46105259 | 46105467 | GPR4       | ENSG00000177464 | 103   | 0.24 | 0.15 | 0.062 | 0.097  | NA |
| chr19 | 51142284 | 51142986 | SYT3       | ENSG00000213023 | -1333 | 0.23 | 0.15 | 0.063 | 0.086  | NA |
| chr19 | 4279042  | 4279809  | SHD        | ENSG00000105251 | 827   | 0.24 | 0.14 | 0.064 | 0.093  | NA |
| chr19 | 9545783  | 9546302  | ZNF266     | ENSG00000174652 | 192   | 0.32 | 0.23 | 0.064 | 0.088  | NA |
| chr19 | 49956279 | 49956837 | ALDH16A1   | ENSG00000161618 | 85    | 0.33 | 0.62 | 0.064 | -0.3   | NA |
| chr19 | 14800835 | 14801167 | ZNF333     | ENSG00000160961 | 120   | 0.15 | 0.25 | 0.068 | -0.097 | NA |
| chr19 | 8008049  | 8008964  | TIMM44     | ENSG00000104980 | 202   | 0.19 | 0.26 | 0.069 | -0.076 | NA |
| chr19 | 47633911 | 47634364 | SAE1       | ENSG00000142230 | 57    | 0.28 | 0.18 | 0.069 | 0.096  | NA |
| chr19 | 50979429 | 50980208 | C19orf63   | ENSG00000161671 | 82    | 0.18 | 0.11 | 0.069 | 0.071  | NA |
| chr19 | 48867188 | 48867607 | TMEM143    | ENSG00000161558 | -202  | 0.2  | 0.32 | 0.07  | -0.12  | NA |
| chr19 | 50370379 | 50370993 | PNKP       | ENSG00000039650 | 132   | 0.25 | 0.17 | 0.07  | 0.082  | NA |
| chr19 | 48246632 | 48247114 | GLTSCR2    | ENSG00000105373 | -1920 | 0.26 | 0.14 | 0.071 | 0.13   | NA |
| chr19 | 12595124 | 12595883 | ZNF709     | ENSG00000242852 | 140   | 0.28 | 0.17 | 0.072 | 0.1    | NA |
| chr19 | 18653766 | 18654531 | FKBP8      | ENSG00000105701 | -366  | 0.25 | 0.39 | 0.072 | -0.14  | NA |
| chr19 | 19322675 | 19322916 | NCAN       | ENSG00000130287 | 13    | 0.36 | 0.09 | 0.072 | 0.27   | NA |
| chr19 | 58873264 | 58874535 | ZNF497     | ENSG00000174586 | 180   | 0.23 | 0.17 | 0.072 | 0.065  | NA |
| chr19 | 12831793 | 12832225 | TNPO2      | ENSG00000105576 | 274   | 0.2  | 0.32 | 0.073 | -0.11  | NA |

|       |          |          |            |                 |       |      |      |       |        |    |
|-------|----------|----------|------------|-----------------|-------|------|------|-------|--------|----|
| chr19 | 15489856 | 15491258 | AKAP8      | ENSG00000105127 | 35    | 0.25 | 0.2  | 0.073 | 0.055  | NA |
| chr19 | 18497063 | 18497269 | GDF15      | ENSG00000130513 | 198   | 0.74 | 0.54 | 0.073 | 0.2    | NA |
| chr19 | 3801392  | 3801819  | MATK       | ENSG00000007264 | 205   | 0.32 | 0.19 | 0.074 | 0.13   | NA |
| chr19 | 52873084 | 52873572 | ZNF880     | ENSG00000221923 | 158   | 0.27 | 0.1  | 0.075 | 0.18   | NA |
| chr19 | 51294876 | 51295098 | ACPT       | ENSG00000142513 | 1315  | 0.61 | 0.75 | 0.076 | -0.13  | NA |
| chr19 | 55628488 | 55629105 | PPP1R12C   | ENSG00000125503 | 131   | 0.19 | 0.25 | 0.076 | -0.067 | NA |
| chr19 | 58325855 | 58326330 | ZNF552     | ENSG00000178935 | 189   | 0.18 | 0.3  | 0.076 | -0.12  | NA |
| chr19 | 12848278 | 12848586 | ASNA1      | ENSG00000198356 | 126   | 0.28 | 0.17 | 0.077 | 0.11   | NA |
| chr19 | 53868810 | 53869485 | ZNF525     | ENSG00000203326 | 201   | 0.36 | 0.25 | 0.077 | 0.11   | NA |
| chr19 | 12707696 | 12708114 | ZNF490     | ENSG00000188033 | 220   | 0.85 | 0.73 | 0.081 | 0.12   | NA |
| chr19 | 38879342 | 38879559 | GGN        | ENSG00000179168 | -782  | 0.42 | 0.88 | 0.081 | -0.45  | NA |
| chr19 | 49127388 | 49127720 | SPHK2      | ENSG00000063176 | -664  | 0.4  | 0.18 | 0.081 | 0.22   | NA |
| chr19 | 39522264 | 39523227 | FBXO27     | ENSG00000161243 | 420   | 0.29 | 0.21 | 0.083 | 0.077  | NA |
| chr19 | 36164077 | 36164286 | AC002115.7 | ENSG00000226510 | 12    | 0.35 | 0.17 | 0.084 | 0.18   | NA |
| chr19 | 36630420 | 36631142 | CAPNS1     | ENSG00000126247 | -137  | 0.3  | 0.2  | 0.084 | 0.096  | NA |
| chr19 | 54485303 | 54486322 | MIR935     | ENSG00000215998 | 251   | 0.24 | 0.2  | 0.085 | 0.045  | NA |
| chr19 | 45582337 | 45582936 | GEMIN7     | ENSG00000142252 | 106   | 0.28 | 0.19 | 0.087 | 0.092  | NA |
| chr19 | 8407674  | 8408338  | KANK3      | ENSG00000186994 | 140   | 0.43 | 0.31 | 0.089 | 0.13   | NA |
| chr19 | 36235807 | 36236548 | U2AF1L4    | ENSG00000161265 | 129   | 0.27 | 0.2  | 0.089 | 0.074  | NA |
| chr19 | 46526046 | 46526334 | PGLYRP1    | ENSG00000008438 | 366   | 0.4  | 0.54 | 0.089 | -0.14  | NA |
| chr19 | 50016531 | 50016851 | FCGRT      | ENSG00000104870 | 66    | 0.23 | 0.41 | 0.089 | -0.18  | NA |
| chr19 | 17666192 | 17666978 | GLT25D1    | ENSG00000130309 | 125   | 0.19 | 0.26 | 0.09  | -0.064 | NA |
| chr19 | 51014318 | 51014873 | JOSD2      | ENSG00000161677 | -250  | 0.24 | 0.17 | 0.09  | 0.064  | NA |
| chr19 | 52900955 | 52901158 | AC010332.1 | ENSG00000246015 | -71   | 0.31 | 0.48 | 0.092 | -0.17  | NA |
| chr19 | 13915618 | 13915840 | ZSWIM4     | ENSG00000132003 | -146  | 0.89 | 0.33 | 0.093 | 0.56   | NA |
| chr19 | 14228461 | 14229264 | PRKACA     | ENSG00000072062 | -303  | 0.35 | 0.23 | 0.093 | 0.12   | NA |
| chr19 | 21769189 | 21769786 | AC092364.2 | ENSG00000249576 | -109  | 0.18 | 0.26 | 0.093 | -0.074 | NA |
| chr19 | 41107297 | 41107580 | LTBP4      | ENSG00000090006 | 161   | 0.21 | 0.13 | 0.093 | 0.085  | NA |
| chr19 | 8214335  | 8214699  | FBN3       | ENSG00000142449 | -1867 | 0.27 | 0.5  | 0.094 | -0.23  | NA |
| chr19 | 54369387 | 54369809 | MYADM      | ENSG00000179820 | 121   | 0.28 | 0.45 | 0.094 | -0.18  | NA |

|       |          |          |            |                 |       |      |      |       |        |    |
|-------|----------|----------|------------|-----------------|-------|------|------|-------|--------|----|
| chr19 | 10491019 | 10491720 | TYK2       | ENSG00000105397 | -183  | 0.41 | 0.29 | 0.095 | 0.12   | NA |
| chr19 | 45873339 | 45874033 | ERCC2      | ENSG00000104884 | 100   | 0.57 | 0.31 | 0.095 | 0.26   | NA |
| chr19 | 52390841 | 52391368 | ZNF577     | ENSG00000161551 | 38    | 0.75 | 0.36 | 0.095 | 0.39   | NA |
| chr19 | 33571758 | 33572194 | GPATCH1    | ENSG00000076650 | 190   | 0.23 | 0.15 | 0.097 | 0.077  | NA |
| chr19 | 9434784  | 9435144  | ZNF559     | ENSG00000188321 | 91    | 0.19 | 0.3  | 0.099 | -0.11  | NA |
| chr19 | 41082615 | 41083355 | SHKBP1     | ENSG00000160410 | 228   | 0.17 | 0.28 | 0.099 | -0.11  | NA |
| chr19 | 57862441 | 57863236 | ZNF304     | ENSG00000131845 | 193   | 0.19 | 0.25 | 0.099 | -0.057 | NA |
| chr19 | 1039764  | 1040254  | ABCA7      | ENSG00000064687 | -93   | 0.27 | 0.2  | 0.1   | 0.072  | NA |
| chr19 | 1478603  | 1479621  | C19orf25   | ENSG00000119559 | 86    | 0.25 | 0.2  | 0.1   | 0.053  | NA |
| chr19 | 5690127  | 5692213  | RPL36      | ENSG00000130255 | 898   | 0.26 | 0.21 | 0.1   | 0.052  | NA |
| chr19 | 6459235  | 6460651  | SLC25A23   | ENSG00000125648 | -197  | 0.25 | 0.17 | 0.1   | 0.072  | NA |
| chr19 | 17356979 | 17357500 | NR2F6      | ENSG00000160113 | -1088 | 0.21 | 0.13 | 0.1   | 0.077  | NA |
| chr19 | 17597344 | 17598000 | SLC27A1    | ENSG00000130304 | 53    | 0.95 | 0.88 | 0.1   | 0.071  | NA |
| chr19 | 19383703 | 19384283 | TM6SF2     | ENSG00000213996 | 81    | 0.16 | 0.23 | 0.1   | -0.068 | NA |
| chr19 | 19430966 | 19432194 | SUGP1      | ENSG00000105705 | -262  | 0.33 | 0.24 | 0.1   | 0.09   | NA |
| chr19 | 53970802 | 53971473 | ZNF813     | ENSG00000198346 | 148   | 0.17 | 0.27 | 0.1   | -0.1   | NA |
| chr19 | 55493906 | 55494119 | NLRP2      | ENSG00000022556 | -842  | 0.78 | 0.62 | 0.1   | 0.15   | NA |
| chr19 | 506526   | 507133   | C19orf20   | ENSG00000141933 | -668  | 0.2  | 0.11 | 0.11  | 0.082  | NA |
| chr19 | 3761480  | 3761826  | APBA3      | ENSG00000011132 | 20    | 0.26 | 0.18 | 0.11  | 0.087  | NA |
| chr19 | 12661804 | 12662302 | ZNF564     | ENSG00000249709 | 193   | 0.38 | 0.25 | 0.11  | 0.13   | NA |
| chr19 | 15121590 | 15122143 | CCDC105    | ENSG00000160994 | 327   | 0.33 | 0.11 | 0.11  | 0.22   | NA |
| chr19 | 17186043 | 17187233 | HAUS8      | ENSG00000131351 | -295  | 0.2  | 0.27 | 0.11  | -0.067 | NA |
| chr19 | 17448735 | 17449043 | GTPBP3     | ENSG00000130299 | 495   | 0.15 | 0.22 | 0.11  | -0.066 | NA |
| chr19 | 35395938 | 35396476 | AC008555.4 | ENSG00000256946 | -12   | 0.2  | 0.14 | 0.11  | 0.066  | NA |
| chr19 | 45737482 | 45738145 | EXOC3L2    | ENSG00000130201 | -344  | 0.22 | 0.17 | 0.11  | 0.052  | NA |
| chr19 | 47219434 | 47220817 | PRKD2      | ENSG00000105287 | 259   | 0.29 | 0.22 | 0.11  | 0.068  | NA |
| chr19 | 49199964 | 49200184 | FUT2       | ENSG00000176920 | 784   | 0.25 | 0.36 | 0.11  | -0.11  | NA |
| chr19 | 49575129 | 49576076 | KCNA7      | ENSG00000104848 | 596   | 0.19 | 0.15 | 0.11  | 0.042  | NA |
| chr19 | 54412710 | 54413087 | CACNG7     | ENSG00000105605 | 309   | 0.26 | 0.2  | 0.11  | 0.061  | NA |
| chr19 | 59084201 | 59085059 | AC016629.2 | ENSG00000213753 | -240  | 0.27 | 0.21 | 0.11  | 0.063  | NA |

|       |          |          |          |                 |       |      |      |      |        |    |
|-------|----------|----------|----------|-----------------|-------|------|------|------|--------|----|
| chr19 | 1450056  | 1450387  | APC2     | ENSG00000115266 | 73    | 0.22 | 0.12 | 0.12 | 0.1    | NA |
| chr19 | 3481782  | 3482048  | C19orf77 | ENSG00000095932 | -1375 | 0.44 | 0.52 | 0.12 | -0.083 | NA |
| chr19 | 6737239  | 6737780  | GPR108   | ENSG00000125734 | -238  | 0.21 | 0.14 | 0.12 | 0.067  | NA |
| chr19 | 7565704  | 7566313  | C19orf45 | ENSG00000198723 | -151  | 0.14 | 0.2  | 0.12 | -0.061 | NA |
| chr19 | 12444032 | 12444548 | ZNF563   | ENSG00000188868 | 212   | 0.28 | 0.16 | 0.12 | 0.13   | NA |
| chr19 | 12911931 | 12912918 | PRDX2    | ENSG00000167815 | 177   | 0.24 | 0.18 | 0.12 | 0.059  | NA |
| chr19 | 17326114 | 17326551 | USE1     | ENSG00000053501 | 177   | 0.26 | 0.18 | 0.12 | 0.084  | NA |
| chr19 | 18209911 | 18210268 | MAST3    | ENSG00000099308 | 1486  | 0.25 | 0.16 | 0.12 | 0.089  | NA |
| chr19 | 36359232 | 36359775 | APLP1    | ENSG00000105290 | 102   | 0.17 | 0.24 | 0.12 | -0.071 | NA |
| chr19 | 37157632 | 37158119 | ZNF461   | ENSG00000197808 | -136  | 0.22 | 0.32 | 0.12 | -0.099 | NA |
| chr19 | 38307878 | 38308526 | ZNF573   | ENSG00000189144 | -262  | 0.19 | 0.29 | 0.12 | -0.099 | NA |
| chr19 | 39390033 | 39390895 | SIRT2    | ENSG00000068903 | -306  | 0.28 | 0.21 | 0.12 | 0.074  | NA |
| chr19 | 41698743 | 41699325 | CYP2S1   | ENSG00000167600 | -81   | 0.22 | 0.15 | 0.12 | 0.071  | NA |
| chr19 | 45393833 | 45394992 | TOMM40   | ENSG00000130204 | -65   | 0.25 | 0.34 | 0.12 | -0.091 | NA |
| chr19 | 49925626 | 49926012 | PTH2     | ENSG00000142538 | 879   | 0.26 | 0.13 | 0.12 | 0.13   | NA |
| chr19 | 50312011 | 50312821 | FUZ      | ENSG00000010361 | -334  | 0.26 | 0.16 | 0.12 | 0.1    | NA |
| chr19 | 55918699 | 55919816 | UBE2S    | ENSG00000108106 | 68    | 0.17 | 0.22 | 0.12 | -0.046 | NA |
| chr19 | 727956   | 728177   | PALM     | ENSG00000099864 | 280   | 0.8  | 0.72 | 0.13 | 0.087  | NA |
| chr19 | 4968557  | 4969417  | KDM4B    | ENSG00000127663 | -137  | 0.19 | 0.25 | 0.13 | -0.056 | NA |
| chr19 | 6108821  | 6109073  | RFX2     | ENSG00000087903 | 1628  | 0.19 | 0.5  | 0.13 | -0.31  | NA |
| chr19 | 7459779  | 7460376  | ARHGEF18 | ENSG00000104880 | 78    | 0.21 | 0.13 | 0.13 | 0.071  | NA |
| chr19 | 11071116 | 11072340 | SMARCA4  | ENSG00000127616 | 130   | 0.27 | 0.22 | 0.13 | 0.054  | NA |
| chr19 | 18111566 | 18112481 | ARRDC2   | ENSG00000105643 | 79    | 0.27 | 0.2  | 0.13 | 0.073  | NA |
| chr19 | 22469367 | 22469687 | ZNF729   | ENSG00000196350 | 275   | 0.44 | 0.24 | 0.13 | 0.19   | NA |
| chr19 | 34855910 | 34856915 | GPI      | ENSG00000105220 | 380   | 0.21 | 0.15 | 0.13 | 0.056  | NA |
| chr19 | 35758201 | 35759670 | USF2     | ENSG00000105698 | -961  | 0.22 | 0.27 | 0.13 | -0.05  | NA |
| chr19 | 37095680 | 37096589 | ZNF382   | ENSG00000161298 | 415   | 0.21 | 0.16 | 0.13 | 0.048  | NA |
| chr19 | 37340918 | 37341262 | ZNF790   | ENSG00000197863 | 125   | 0.3  | 0.2  | 0.13 | 0.095  | NA |
| chr19 | 40323907 | 40325005 | DYRK1B   | ENSG00000105204 | 385   | 0.28 | 0.21 | 0.13 | 0.077  | NA |
| chr19 | 40336877 | 40337211 | FBL      | ENSG00000105202 | 10    | 0.2  | 0.13 | 0.13 | 0.067  | NA |

|       |          |          |               |                 |       |      |      |      |        |    |
|-------|----------|----------|---------------|-----------------|-------|------|------|------|--------|----|
| chr19 | 49253688 | 49254221 | FUT1          | ENSG00000174951 | 584   | 0.86 | 0.92 | 0.13 | -0.063 | NA |
| chr19 | 49588358 | 49589080 | SNRNP70       | ENSG00000104852 | 254   | 0.28 | 0.22 | 0.13 | 0.059  | NA |
| chr19 | 50528176 | 50529486 | VRK3          | ENSG00000105053 | -205  | 0.19 | 0.3  | 0.13 | -0.11  | NA |
| chr19 | 54411376 | 54411968 | CACNG7        | ENSG00000105605 | -917  | 0.28 | 0.18 | 0.13 | 0.099  | NA |
| chr19 | 58125530 | 58125902 | ZNF134        | ENSG00000213762 | 97    | 0.18 | 0.13 | 0.13 | 0.059  | NA |
| chr19 | 2782894  | 2783619  | SGTA          | ENSG00000104969 | 98    | 0.21 | 0.3  | 0.14 | -0.094 | NA |
| chr19 | 10426381 | 10426723 | FDX1L         | ENSG00000167807 | -81   | 0.15 | 0.23 | 0.14 | -0.077 | NA |
| chr19 | 11616031 | 11616847 | ZNF653        | ENSG00000161914 | 299   | 0.22 | 0.15 | 0.14 | 0.077  | NA |
| chr19 | 13260562 | 13264924 | STX10         | ENSG00000104915 | -1756 | 0.22 | 0.26 | 0.14 | -0.035 | NA |
| chr19 | 14542768 | 14543102 | PKN1          | ENSG00000123143 | -1234 | 0.46 | 0.26 | 0.14 | 0.2    | NA |
| chr19 | 17622317 | 17623316 | PGLS          | ENSG00000130313 | 384   | 0.21 | 0.26 | 0.14 | -0.046 | NA |
| chr19 | 19302854 | 19303148 | MEF2BNB-MEF2B | ENSG00000064489 | -92   | 0.33 | 0.21 | 0.14 | 0.11   | NA |
| chr19 | 23941240 | 23941538 | ZNF681        | ENSG00000196172 | 250   | 0.23 | 0.37 | 0.14 | -0.14  | NA |
| chr19 | 36024182 | 36024803 | GAPDHS        | ENSG00000105679 | 178   | 0.59 | 0.49 | 0.14 | 0.1    | NA |
| chr19 | 41857247 | 41857586 | TMEM91        | ENSG00000142046 | 600   | 0.09 | 0.23 | 0.14 | -0.14  | NA |
| chr19 | 44529393 | 44529778 | ZNF222        | ENSG00000159885 | 91    | 0.21 | 0.36 | 0.14 | -0.15  | NA |
| chr19 | 44598374 | 44598854 | ZNF224        | ENSG00000186019 | 111   | 0.25 | 0.15 | 0.14 | 0.098  | NA |
| chr19 | 45908140 | 45908466 | PPP1R13L      | ENSG00000104881 | 9     | 0.35 | 0.24 | 0.14 | 0.1    | NA |
| chr19 | 49122277 | 49122923 | RPL18         | ENSG00000063177 | -216  | 0.19 | 0.26 | 0.14 | -0.067 | NA |
| chr19 | 49242018 | 49242962 | RASIP1        | ENSG00000105538 | 1480  | 0.22 | 0.17 | 0.14 | 0.053  | NA |
| chr19 | 531114   | 532896   | CDC34         | ENSG00000099804 | 272   | 0.22 | 0.18 | 0.15 | 0.044  | NA |
| chr19 | 2944682  | 2945507  | ZNF77         | ENSG00000175691 | -125  | 0.27 | 0.22 | 0.15 | 0.051  | NA |
| chr19 | 4007161  | 4008167  | PIAS4         | ENSG00000105229 | -84   | 0.21 | 0.18 | 0.15 | 0.039  | NA |
| chr19 | 5831595  | 5832297  | FUT6          | ENSG00000156413 | 632   | 0.52 | 0.74 | 0.15 | -0.22  | NA |
| chr19 | 34745218 | 34746204 | KIAA0355      | ENSG00000166398 | 255   | 0.37 | 0.29 | 0.15 | 0.082  | NA |
| chr19 | 37263381 | 37264083 | AC020928.1    | ENSG00000244997 | -323  | 0.32 | 0.23 | 0.15 | 0.093  | NA |
| chr19 | 38397003 | 38398165 | WDR87         | ENSG00000171804 | -331  | 0.26 | 0.21 | 0.15 | 0.049  | NA |
| chr19 | 41103966 | 41104322 | LTBP4         | ENSG00000090006 | 1003  | 0.23 | 0.09 | 0.15 | 0.14   | NA |
| chr19 | 44258613 | 44259343 | C19orf61      | ENSG00000105771 | 164   | 0.25 | 0.19 | 0.15 | 0.068  | NA |
| chr19 | 45347846 | 45348229 | PVRL2         | ENSG00000130202 | -1356 | 0.41 | 0.23 | 0.15 | 0.17   | NA |

|       |          |          |                |                 |       |      |      |      |        |    |
|-------|----------|----------|----------------|-----------------|-------|------|------|------|--------|----|
| chr19 | 46234041 | 46234378 | FBXO46         | ENSG00000177051 | -58   | 0.37 | 0.28 | 0.15 | 0.098  | NA |
| chr19 | 4246828  | 4247222  | CCDC94         | ENSG00000105248 | -62   | 0.67 | 0.32 | 0.16 | 0.35   | NA |
| chr19 | 14246899 | 14248520 | ASF1B          | ENSG00000105011 | -323  | 0.27 | 0.33 | 0.16 | -0.067 | NA |
| chr19 | 18682374 | 18683034 | UBA52          | ENSG00000221983 | 90    | 0.17 | 0.22 | 0.16 | -0.053 | NA |
| chr19 | 19639902 | 19640142 | YJEFN3         | ENSG00000250067 | 280   | 0.25 | 0.15 | 0.16 | 0.1    | NA |
| chr19 | 22034394 | 22034943 | ZNF43          | ENSG00000198521 | 162   | 0.22 | 0.3  | 0.16 | -0.073 | NA |
| chr19 | 41283880 | 41284276 | RAB4B          | ENSG00000167578 | -93   | 0.21 | 0.33 | 0.16 | -0.13  | NA |
| chr19 | 44439200 | 44439612 | ZNF45          | ENSG00000124459 | 5     | 0.21 | 0.14 | 0.16 | 0.072  | NA |
| chr19 | 58513455 | 58514498 | ZNF606         | ENSG00000166704 | 138   | 0.2  | 0.24 | 0.16 | -0.043 | NA |
| chr19 | 982689   | 983080   | WDR18          | ENSG00000065268 | -1444 | 0.27 | 0.15 | 0.17 | 0.12   | NA |
| chr19 | 4400117  | 4400782  | SH3GL1         | ENSG00000141985 | 47    | 0.15 | 0.2  | 0.17 | -0.054 | NA |
| chr19 | 6110066  | 6110878  | RFX2           | ENSG00000087903 | 103   | 0.21 | 0.16 | 0.17 | 0.056  | NA |
| chr19 | 7580824  | 7581415  | ZNF358         | ENSG00000198816 | 115   | 0.31 | 0.21 | 0.17 | 0.1    | NA |
| chr19 | 7985664  | 7985975  | SNAPC2         | ENSG00000104976 | 625   | 0.21 | 0.08 | 0.17 | 0.14   | NA |
| chr19 | 10613046 | 10614280 | KEAP1          | ENSG00000079999 | -182  | 0.18 | 0.23 | 0.17 | -0.045 | NA |
| chr19 | 11456744 | 11457251 | TMEM205        | ENSG00000105518 | -16   | 0.22 | 0.32 | 0.17 | -0.1   | NA |
| chr19 | 17858371 | 17858891 | FCHO1          | ENSG00000130475 | 104   | 0.23 | 0.14 | 0.17 | 0.083  | NA |
| chr19 | 30206040 | 30206497 | C19orf12       | ENSG00000131943 | -140  | 0.27 | 0.2  | 0.17 | 0.069  | NA |
| chr19 | 36103554 | 36103804 | HAUS5          | ENSG00000249115 | 33    | 0.18 | 0.12 | 0.17 | 0.06   | NA |
| chr19 | 37997790 | 37998125 | ZNF793         | ENSG00000188227 | 116   | 0.25 | 0.12 | 0.17 | 0.13   | NA |
| chr19 | 44100133 | 44100840 | IRGQ           | ENSG00000167378 | -199  | 0.33 | 0.19 | 0.17 | 0.14   | NA |
| chr19 | 44324436 | 44325009 | LYPD5          | ENSG00000159871 | 86    | 0.2  | 0.57 | 0.17 | -0.37  | NA |
| chr19 | 48866487 | 48866707 | TMEM143        | ENSG00000161558 | 598   | 0.5  | 0.19 | 0.17 | 0.31   | NA |
| chr19 | 49468372 | 49469376 | FTL            | ENSG00000087086 | 308   | 0.19 | 0.26 | 0.17 | -0.068 | NA |
| chr19 | 50222807 | 50223379 | CTB-33G10.1    | ENSG00000243829 | 245   | 0.95 | 0.87 | 0.17 | 0.071  | NA |
| chr19 | 51165249 | 51165775 | SHANK1         | ENSG00000161681 | 920   | 0.81 | 0.76 | 0.17 | 0.053  | NA |
| chr19 | 58258088 | 58258619 | ZNF776         | ENSG00000152443 | 189   | 0.27 | 0.2  | 0.17 | 0.068  | NA |
| chr19 | 12753237 | 12753583 | CTD-2192J16.15 | ENSG00000178464 | 1323  | 0.97 | 0.92 | 0.18 | 0.044  | NA |
| chr19 | 15090016 | 15090873 | SLC1A6         | ENSG00000105143 | 25    | 0.21 | 0.3  | 0.18 | -0.085 | NA |
| chr19 | 16308557 | 16309313 | AP1M1          | ENSG00000072958 | 270   | 0.27 | 0.2  | 0.18 | 0.067  | NA |

|       |          |          |            |                 |      |      |      |      |        |    |
|-------|----------|----------|------------|-----------------|------|------|------|------|--------|----|
| chr19 | 17530650 | 17531535 | FAM125A    | ENSG00000141971 | 236  | 0.16 | 0.12 | 0.18 | 0.041  | NA |
| chr19 | 36036002 | 36036607 | AD000090.2 | ENSG00000236144 | 101  | 0.23 | 0.18 | 0.18 | 0.056  | NA |
| chr19 | 41102845 | 41103281 | LTBP4      | ENSG00000090006 | -78  | 0.33 | 0.16 | 0.18 | 0.17   | NA |
| chr19 | 54466357 | 54466725 | CACNG8     | ENSG00000142408 | 247  | 0.32 | 0.45 | 0.18 | -0.13  | NA |
| chr19 | 57352050 | 57352284 | ZIM2       | ENSG00000198300 | -73  | 0.57 | 0.46 | 0.18 | 0.11   | NA |
| chr19 | 58986853 | 58988049 | ZNF446     | ENSG00000083838 | -344 | 0.29 | 0.24 | 0.18 | 0.049  | NA |
| chr19 | 1908118  | 1908509  | SCAMP4     | ENSG00000227500 | 50   | 0.93 | 0.85 | 0.19 | 0.078  | NA |
| chr19 | 2702532  | 2702987  | GNG7       | ENSG00000176533 | -13  | 0.27 | 0.19 | 0.19 | 0.076  | NA |
| chr19 | 58891834 | 58892641 | ZNF837     | ENSG00000152475 | 152  | 0.25 | 0.21 | 0.19 | 0.047  | NA |
| chr19 | 6463991  | 6464780  | CRB3       | ENSG00000130545 | 125  | 0.32 | 0.26 | 0.2  | 0.066  | NA |
| chr19 | 37861691 | 37862233 | ZNF527     | ENSG00000189164 | -97  | 0.3  | 0.2  | 0.2  | 0.099  | NA |
| chr19 | 39903036 | 39904490 | PLEKHG2    | ENSG00000090924 | 538  | 0.19 | 0.23 | 0.2  | -0.042 | NA |
| chr19 | 45251975 | 45252330 | BCL3       | ENSG00000069399 | 348  | 0.23 | 0.15 | 0.2  | 0.084  | NA |
| chr19 | 53193139 | 53193945 | ZNF83      | ENSG00000167766 | 199  | 0.14 | 0.22 | 0.2  | -0.08  | NA |
| chr19 | 58446336 | 58446800 | ZNF418     | ENSG00000196724 | 172  | 0.25 | 0.16 | 0.2  | 0.091  | NA |
| chr19 | 639150   | 639400   | FGF22      | ENSG00000070388 | -651 | 0.26 | 0.13 | 0.21 | 0.12   | NA |
| chr19 | 814444   | 815238   | MIR3187    | ENSG00000129951 | -92  | 0.9  | 0.95 | 0.21 | -0.05  | NA |
| chr19 | 2477134  | 2477377  | GADD45B    | ENSG00000099860 | 1132 | 0.26 | 0.15 | 0.21 | 0.11   | NA |
| chr19 | 5680433  | 5681417  | C19orf70   | ENSG00000174917 | -14  | 0.27 | 0.21 | 0.21 | 0.06   | NA |
| chr19 | 6530826  | 6531552  | TNFSF9     | ENSG00000125657 | 179  | 0.33 | 0.22 | 0.21 | 0.11   | NA |
| chr19 | 7660572  | 7661594  | KIAA1543   | ENSG00000076826 | 295  | 0.25 | 0.2  | 0.21 | 0.045  | NA |
| chr19 | 13226897 | 13227660 | TRMT1      | ENSG00000104907 | 185  | 0.23 | 0.32 | 0.21 | -0.084 | NA |
| chr19 | 36207084 | 36209691 | AD000671.1 | ENSG00000105663 | -534 | 0.2  | 0.18 | 0.21 | 0.025  | NA |
| chr19 | 42509859 | 42510094 | GRIK5      | ENSG00000105737 | 986  | 0.99 | 0.95 | 0.21 | 0.036  | NA |
| chr19 | 46318490 | 46319266 | RSPH6A     | ENSG00000104941 | -273 | 0.2  | 0.25 | 0.21 | -0.044 | NA |
| chr19 | 53696029 | 53696650 | ZNF665     | ENSG00000197497 | 280  | 0.17 | 0.31 | 0.21 | -0.14  | NA |
| chr19 | 56196666 | 56197119 | AC010525.2 | ENSG00000211571 | 754  | 0.91 | 0.95 | 0.21 | -0.04  | NA |
| chr19 | 913135   | 913715   | C19orf22   | ENSG00000198858 | -200 | 0.25 | 0.2  | 0.22 | 0.051  | NA |
| chr19 | 1064897  | 1065191  | ABCA7      | ENSG00000064687 | 386  | 0.18 | 0.26 | 0.22 | -0.085 | NA |
| chr19 | 1236946  | 1238311  | C19orf26   | ENSG00000099625 | 362  | 0.23 | 0.19 | 0.22 | 0.033  | NA |



|       |          |          |            |                 |       |      |      |      |        |    |
|-------|----------|----------|------------|-----------------|-------|------|------|------|--------|----|
| chr19 | 3178741  | 3179986  | S1PR4      | ENSG00000125910 | 627   | 0.76 | 0.82 | 0.22 | -0.061 | NA |
| chr19 | 8674332  | 8674764  | ADAMTS10   | ENSG00000142303 | -1365 | 0.19 | 0.26 | 0.22 | -0.067 | NA |
| chr19 | 13056458 | 13057125 | RAD23A     | ENSG00000179262 | 137   | 0.18 | 0.22 | 0.22 | -0.04  | NA |
| chr19 | 18271738 | 18272232 | PIK3R2     | ENSG00000105647 | 308   | 0.34 | 0.19 | 0.22 | 0.14   | NA |
| chr19 | 18303623 | 18304425 | MPV17L2    | ENSG00000254858 | -4    | 0.23 | 0.17 | 0.22 | 0.054  | NA |
| chr19 | 18942432 | 18943127 | UPF1       | ENSG00000005007 | 35    | 0.2  | 0.24 | 0.22 | -0.043 | NA |
| chr19 | 21688622 | 21688839 | ZNF429     | ENSG00000197013 | 293   | 0.26 | 0.12 | 0.22 | 0.13   | NA |
| chr19 | 39322264 | 39322574 | ECH1       | ENSG00000104823 | 78    | 0.2  | 0.3  | 0.22 | -0.1   | NA |
| chr19 | 41882507 | 41882773 | TMEM91     | ENSG00000142046 | 2     | 0.22 | 0.16 | 0.22 | 0.059  | NA |
| chr19 | 45458213 | 45459083 | CLPTM1     | ENSG00000104853 | 381   | 0.22 | 0.17 | 0.22 | 0.056  | NA |
| chr19 | 45843870 | 45844418 | KLC3       | ENSG00000104892 | 146   | 0.23 | 0.16 | 0.22 | 0.067  | NA |
| chr19 | 49622023 | 49623635 | C19orf73   | ENSG00000221916 | -432  | 0.25 | 0.22 | 0.22 | 0.032  | NA |
| chr19 | 53073308 | 53074039 | ZNF701     | ENSG00000167562 | 147   | 0.21 | 0.32 | 0.22 | -0.1   | NA |
| chr19 | 1383437  | 1384251  | NDUFS7     | ENSG00000115286 | 318   | 0.22 | 0.26 | 0.23 | -0.038 | NA |
| chr19 | 4909262  | 4910256  | UHRF1      | ENSG00000034063 | 249   | 0.27 | 0.22 | 0.23 | 0.044  | NA |
| chr19 | 9473589  | 9474001  | ZNF177     | ENSG00000188629 | 99    | 0.25 | 0.19 | 0.23 | 0.066  | NA |
| chr19 | 17413733 | 17414486 | ABHD8      | ENSG00000127220 | 126   | 0.27 | 0.2  | 0.23 | 0.07   | NA |
| chr19 | 37568952 | 37569549 | ZNF420     | ENSG00000197050 | -87   | 0.24 | 0.19 | 0.23 | 0.054  | NA |
| chr19 | 49315545 | 49315765 | BCAT2      | ENSG00000105552 | -1335 | 0.18 | 0.27 | 0.23 | -0.094 | NA |
| chr19 | 49617455 | 49618569 | LIN7B      | ENSG00000104863 | 431   | 0.23 | 0.19 | 0.23 | 0.045  | NA |
| chr19 | 690638   | 690927   | AC112708.1 | ENSG00000213726 | 401   | 0.88 | 0.96 | 0.24 | -0.078 | NA |
| chr19 | 11998804 | 11999131 | ZNF69      | ENSG00000198429 | 297   | 0.36 | 0.24 | 0.24 | 0.12   | NA |
| chr19 | 39109432 | 39109862 | EIF3K      | ENSG00000178982 | -75   | 0.24 | 0.35 | 0.24 | -0.11  | NA |
| chr19 | 40596540 | 40596863 | ZNF780A    | ENSG00000197782 | 94    | 0.25 | 0.18 | 0.24 | 0.07   | NA |
| chr19 | 47615253 | 47617101 | ZC3H4      | ENSG00000130749 | 832   | 0.21 | 0.24 | 0.24 | -0.038 | NA |
| chr19 | 49016737 | 49017207 | LMTK3      | ENSG00000142235 | -526  | 0.26 | 0.17 | 0.24 | 0.095  | NA |
| chr19 | 51815157 | 51815458 | IGLON5     | ENSG00000142549 | 205   | 0.32 | 0.2  | 0.24 | 0.12   | NA |
| chr19 | 1812465  | 1812733  | ATP8B3     | ENSG00000130270 | -324  | 0.25 | 0.18 | 0.25 | 0.077  | NA |
| chr19 | 1862962  | 1863257  | KLF16      | ENSG00000129911 | 387   | 0.21 | 0.17 | 0.25 | 0.045  | NA |
| chr19 | 5977440  | 5978816  | RANBP3     | ENSG00000031823 | 23    | 0.22 | 0.25 | 0.25 | -0.038 | NA |

|       |          |          |            |                 |      |      |      |      |        |    |
|-------|----------|----------|------------|-----------------|------|------|------|------|--------|----|
| chr19 | 38085148 | 38085811 | ZNF571     | ENSG00000180479 | 183  | 0.75 | 0.34 | 0.25 | 0.41   | NA |
| chr19 | 49944408 | 49944656 | SLC17A7    | ENSG00000104888 | 276  | 0.3  | 0.22 | 0.25 | 0.086  | NA |
| chr19 | 7584325  | 7585281  | ZNF358     | ENSG00000198816 | 715  | 0.97 | 0.95 | 0.26 | 0.023  | NA |
| chr19 | 39138062 | 39138570 | ACTN4      | ENSG00000130402 | 6    | 0.28 | 0.2  | 0.26 | 0.086  | NA |
| chr19 | 39616277 | 39616819 | PAK4       | ENSG00000130669 | 128  | 0.24 | 0.19 | 0.26 | 0.046  | NA |
| chr19 | 39926224 | 39926863 | RPS16      | ENSG00000105193 | 33   | 0.17 | 0.24 | 0.26 | -0.071 | NA |
| chr19 | 44507079 | 44507300 | ZNF230     | ENSG00000159882 | 112  | 0.22 | 0.15 | 0.26 | 0.07   | NA |
| chr19 | 45999761 | 46000210 | RTN2       | ENSG00000125744 | 326  | 0.19 | 0.15 | 0.26 | 0.039  | NA |
| chr19 | 46295855 | 46296347 | DMWD       | ENSG00000185800 | -75  | 0.16 | 0.23 | 0.26 | -0.068 | NA |
| chr19 | 49436695 | 49437055 | DHDH       | ENSG00000104808 | -64  | 0.11 | 1    | 0.26 | -0.89  | NA |
| chr19 | 51321267 | 51321781 | AC010325.1 | ENSG00000180279 | 587  | 0.3  | 0.22 | 0.26 | 0.081  | NA |
| chr19 | 54974175 | 54976819 | LENG9      | ENSG00000182909 | -603 | 0.24 | 0.22 | 0.26 | 0.026  | NA |
| chr19 | 55865824 | 55866324 | COX6B2     | ENSG00000160471 | 108  | 0.23 | 0.14 | 0.26 | 0.082  | NA |
| chr19 | 3984962  | 3985722  | EEF2       | ENSG00000167658 | 119  | 0.16 | 0.33 | 0.27 | -0.17  | NA |
| chr19 | 17558917 | 17559679 | TMEM221    | ENSG00000188051 | 78   | 0.21 | 0.28 | 0.27 | -0.067 | NA |
| chr19 | 33792061 | 33794944 | AC008738.2 | ENSG00000230259 | -72  | 0.25 | 0.23 | 0.27 | 0.023  | NA |
| chr19 | 36822395 | 36822690 | AC092296.1 | ENSG00000232677 | 60   | 0.3  | 0.17 | 0.27 | 0.14   | NA |
| chr19 | 49842654 | 49843628 | AC011450.1 | ENSG00000197813 | 418  | 0.46 | 0.39 | 0.27 | 0.07   | NA |
| chr19 | 57999025 | 57999613 | ZNF419     | ENSG00000105136 | 240  | 0.21 | 0.27 | 0.27 | -0.062 | NA |
| chr19 | 13106817 | 13107688 | NFIX       | ENSG00000008441 | 668  | 0.18 | 0.22 | 0.28 | -0.039 | NA |
| chr19 | 852855   | 853495   | ELANE      | ENSG00000197561 | 884  | 0.27 | 0.32 | 0.28 | -0.048 | NA |
| chr19 | 35760457 | 35760865 | USF2       | ENSG00000105698 | 656  | 0.16 | 0.28 | 0.28 | -0.12  | NA |
| chr19 | 38924239 | 38924519 | RYR1       | ENSG00000196218 | 39   | 0.47 | 0.28 | 0.28 | 0.19   | NA |
| chr19 | 40030126 | 40030410 | EID2       | ENSG00000176396 | 570  | 0.27 | 0.41 | 0.28 | -0.13  | NA |
| chr19 | 43967247 | 43968625 | LYPD3      | ENSG00000124466 | 1809 | 0.22 | 0.18 | 0.28 | 0.036  | NA |
| chr19 | 50432354 | 50433138 | NUP62      | ENSG00000213024 | 40   | 0.16 | 0.23 | 0.28 | -0.071 | NA |
| chr19 | 50706482 | 50707196 | MYH14      | ENSG00000105357 | -46  | 0.25 | 0.19 | 0.28 | 0.052  | NA |
| chr19 | 50836390 | 50837447 | KCNC3      | ENSG00000131398 | -146 | 0.21 | 0.17 | 0.28 | 0.045  | NA |
| chr19 | 52531323 | 52531724 | ZNF614     | ENSG00000142556 | 79   | 0.19 | 0.12 | 0.28 | 0.071  | NA |
| chr19 | 52800399 | 52800871 | ZNF480     | ENSG00000198464 | 210  | 0.35 | 0.23 | 0.28 | 0.12   | NA |

|       |          |          |              |                 |       |      |      |      |        |    |
|-------|----------|----------|--------------|-----------------|-------|------|------|------|--------|----|
| chr19 | 56186108 | 56186884 | EPN1         | ENSG00000063245 | -65   | 0.19 | 0.16 | 0.28 | 0.034  | NA |
| chr19 | 58951214 | 58952250 | ZNF132       | ENSG00000131849 | -143  | 0.21 | 0.16 | 0.28 | 0.049  | NA |
| chr19 | 59030657 | 59031426 | ZBTB45       | ENSG00000119574 | -120  | 0.19 | 0.23 | 0.28 | -0.04  | NA |
| chr19 | 1905106  | 1905835  | SCAMP4       | ENSG00000227500 | 99    | 0.23 | 0.27 | 0.29 | -0.04  | NA |
| chr19 | 3556962  | 3558293  | C19orf28     | ENSG00000161091 | -56   | 0.25 | 0.21 | 0.29 | 0.041  | NA |
| chr19 | 3982824  | 3983190  | SNORD37      | ENSG00000206775 | -437  | 0.79 | 0.63 | 0.29 | 0.16   | NA |
| chr19 | 8386082  | 8386972  | NDUFA7       | ENSG00000167774 | -247  | 0.2  | 0.16 | 0.29 | 0.038  | NA |
| chr19 | 35632356 | 35632572 | LG14         | ENSG00000153902 | 891   | 0.21 | 0.11 | 0.29 | 0.11   | NA |
| chr19 | 49061545 | 49061769 | hsa-mir-220c | ENSG00000216151 | 1954  | 0.35 | 0.26 | 0.29 | 0.09   | NA |
| chr19 | 4064086  | 4067980  | ZBTB7A       | ENSG00000178951 | 783   | 0.19 | 0.21 | 0.3  | -0.019 | NA |
| chr19 | 7293340  | 7294450  | INSR         | ENSG00000171105 | 116   | 0.21 | 0.25 | 0.3  | -0.036 | NA |
| chr19 | 10420107 | 10420442 | ZGLP1        | ENSG00000220201 | 185   | 0.94 | 0.88 | 0.3  | 0.061  | NA |
| chr19 | 11038956 | 11040285 | YIPF2        | ENSG00000130733 | -263  | 0.22 | 0.19 | 0.3  | 0.026  | NA |
| chr19 | 14168142 | 14168512 | PALM3        | ENSG00000187867 | 1644  | 0.15 | 0.21 | 0.3  | -0.056 | NA |
| chr19 | 34972054 | 34973645 | WTIP         | ENSG00000142279 | 975   | 0.22 | 0.19 | 0.3  | 0.025  | NA |
| chr19 | 35168145 | 35168979 | AC020910.2   | ENSG00000256383 | -76   | 0.19 | 0.23 | 0.3  | -0.044 | NA |
| chr19 | 50708601 | 50708855 | MYH14        | ENSG00000105357 | 1843  | 0.23 | 0.17 | 0.3  | 0.064  | NA |
| chr19 | 56615088 | 56615955 | Y_RNA        | ENSG00000223060 | -1264 | 0.98 | 0.92 | 0.3  | 0.056  | NA |
| chr19 | 2217742  | 2218096  | DOT1L        | ENSG00000104885 | 1754  | 0.99 | 0.94 | 0.31 | 0.047  | NA |
| chr19 | 3785511  | 3786653  | MATK         | ENSG00000007264 | 333   | 0.19 | 0.22 | 0.31 | -0.036 | NA |
| chr19 | 11750529 | 11751006 | ZNF833P      | ENSG00000197332 | 176   | 0.39 | 0.27 | 0.31 | 0.12   | NA |
| chr19 | 16652513 | 16653740 | CHERP        | ENSG00000085872 | -106  | 0.23 | 0.19 | 0.31 | 0.034  | NA |
| chr19 | 18313908 | 18315129 | RAB3A        | ENSG00000105649 | 304   | 0.25 | 0.19 | 0.31 | 0.061  | NA |
| chr19 | 19738572 | 19739821 | LPAR2        | ENSG00000064547 | -157  | 0.2  | 0.24 | 0.31 | -0.035 | NA |
| chr19 | 49314097 | 49314434 | BCAT2        | ENSG00000105552 | 19    | 0.23 | 0.33 | 0.31 | -0.098 | NA |
| chr19 | 53360824 | 53361067 | ZNF468       | ENSG00000204604 | -43   | 0.43 | 0.24 | 0.31 | 0.19   | NA |
| chr19 | 3028592  | 3029299  | TLE2         | ENSG00000065717 | -141  | 0.26 | 0.22 | 0.32 | 0.042  | NA |
| chr19 | 13049038 | 13049809 | CALR         | ENSG00000179218 | 9     | 0.22 | 0.27 | 0.32 | -0.052 | NA |
| chr19 | 13984606 | 13984918 | MIR181C      | ENSG00000207613 | -751  | 0.93 | 0.88 | 0.32 | 0.047  | NA |
| chr19 | 45281133 | 45281355 | CBLC         | ENSG00000142273 | 118   | 0.28 | 0.21 | 0.32 | 0.067  | NA |

|       |          |          |            |                 |       |      |      |      |        |    |
|-------|----------|----------|------------|-----------------|-------|------|------|------|--------|----|
| chr19 | 50168835 | 50169342 | BCL2L12    | ENSG00000126453 | 7     | 0.31 | 0.4  | 0.32 | -0.089 | NA |
| chr19 | 1604918  | 1605681  | UQCR11     | ENSG00000127540 | 184   | 0.22 | 0.19 | 0.33 | 0.033  | NA |
| chr19 | 1940303  | 1941940  | CSNK1G2    | ENSG00000133275 | -40   | 0.23 | 0.2  | 0.33 | 0.034  | NA |
| chr19 | 7985065  | 7985390  | SNAPC2     | ENSG00000104976 | 33    | 0.2  | 0.28 | 0.33 | -0.083 | NA |
| chr19 | 14628406 | 14629689 | DNAJB1     | ENSG00000132002 | 154   | 0.22 | 0.19 | 0.33 | 0.027  | NA |
| chr19 | 46974557 | 46975073 | PNMAL1     | ENSG00000182013 | -47   | 0.2  | 0.24 | 0.33 | -0.04  | NA |
| chr19 | 7989497  | 7991199  | CTXN1      | ENSG00000178531 | 703   | 0.41 | 0.44 | 0.34 | -0.031 | NA |
| chr19 | 8509635  | 8510765  | HNRNPM     | ENSG00000099783 | 549   | 0.2  | 0.23 | 0.34 | -0.028 | NA |
| chr19 | 19249182 | 19249443 | TMEM161A   | ENSG00000064545 | -45   | 0.25 | 0.18 | 0.34 | 0.066  | NA |
| chr19 | 30302856 | 30303681 | CCNE1      | ENSG00000105173 | 367   | 0.24 | 0.2  | 0.34 | 0.041  | NA |
| chr19 | 36239672 | 36239884 | LIN37      | ENSG00000188223 | 266   | 0.35 | 0.28 | 0.34 | 0.074  | NA |
| chr19 | 36427173 | 36427722 | LRFN3      | ENSG00000126243 | -575  | 0.23 | 0.18 | 0.34 | 0.05   | NA |
| chr19 | 38754846 | 38755699 | SPINT2     | ENSG00000167642 | 174   | 0.21 | 0.16 | 0.34 | 0.042  | NA |
| chr19 | 50100036 | 50101218 | PRR12      | ENSG00000126464 | 1848  | 0.95 | 0.93 | 0.34 | 0.019  | NA |
| chr19 | 50321414 | 50321762 | MED25      | ENSG00000104973 | 52    | 0.33 | 0.18 | 0.34 | 0.15   | NA |
| chr19 | 52452316 | 52452543 | AC011460.1 | ENSG00000246125 | 14    | 0.31 | 0.25 | 0.34 | 0.056  | NA |
| chr19 | 53445344 | 53445933 | ZNF321P    | ENSG00000221874 | 209   | 0.34 | 0.26 | 0.34 | 0.08   | NA |
| chr19 | 1028319  | 1028641  | CNN2       | ENSG00000064666 | 1854  | 0.25 | 0.2  | 0.35 | 0.053  | NA |
| chr19 | 12250694 | 12251217 | ZNF20      | ENSG00000132010 | 161   | 0.3  | 0.17 | 0.35 | 0.13   | NA |
| chr19 | 22193330 | 22193583 | ZNF208     | ENSG00000160321 | 289   | 0.32 | 0.22 | 0.35 | 0.098  | NA |
| chr19 | 41196279 | 41197107 | NUMBL      | ENSG00000105245 | -137  | 0.18 | 0.22 | 0.35 | -0.04  | NA |
| chr19 | 48896890 | 48897199 | GRIN2D     | ENSG00000105464 | -1088 | 0.33 | 0.12 | 0.35 | 0.21   | NA |
| chr19 | 50881418 | 50881664 | NR1H2      | ENSG00000131408 | 1796  | 0.69 | 0.63 | 0.35 | 0.061  | NA |
| chr19 | 7294882  | 7295108  | INSR       | ENSG00000171105 | -984  | 0.15 | 0.2  | 0.36 | -0.051 | NA |
| chr19 | 8807813  | 8808794  | ACTL9      | ENSG00000181786 | 869   | 0.71 | 0.77 | 0.36 | -0.065 | NA |
| chr19 | 10120750 | 10121231 | COL5A3     | ENSG00000080573 | 157   | 0.41 | 0.3  | 0.36 | 0.12   | NA |
| chr19 | 18721523 | 18721869 | TMEM59L    | ENSG00000105696 | -1986 | 0.44 | 0.52 | 0.36 | -0.081 | NA |
| chr19 | 50030981 | 50031300 | RCN3       | ENSG00000142552 | 265   | 0.52 | 0.7  | 0.36 | -0.18  | NA |
| chr19 | 51307439 | 51308380 | C19orf48   | ENSG00000167747 | 63    | 0.22 | 0.26 | 0.36 | -0.043 | NA |
| chr19 | 55972697 | 55973442 | ISOC2      | ENSG00000063241 | -20   | 0.23 | 0.19 | 0.36 | 0.042  | NA |

|       |          |          |               |                  |       |      |      |      |        |    |
|-------|----------|----------|---------------|------------------|-------|------|------|------|--------|----|
| chr19 | 795360   | 795561   | PTBP1         | ENSG00000011304  | -1932 | 0.26 | 0.32 | 0.37 | -0.058 | NA |
| chr19 | 17905579 | 17906317 | B3GNT3        | ENSG000000179913 | 29    | 0.24 | 0.28 | 0.37 | -0.044 | NA |
| chr19 | 46214961 | 46216180 | FBXO46        | ENSG000000177051 | -146  | 0.92 | 0.9  | 0.37 | 0.023  | NA |
| chr19 | 55791274 | 55791818 | HSPBP1        | ENSG000000133265 | -67   | 0.19 | 0.14 | 0.37 | 0.054  | NA |
| chr19 | 55987544 | 55988171 | ZNF628        | ENSG000000197483 | 158   | 0.25 | 0.2  | 0.37 | 0.045  | NA |
| chr19 | 7977471  | 7977717  | MAP2K7        | ENSG00000076984  | 1610  | 0.88 | 0.8  | 0.38 | 0.075  | NA |
| chr19 | 12371052 | 12371335 | CTD-2666L21.3 | ENSG000000213293 | 252   | 1    | 0.88 | 0.38 | 0.12   | NA |
| chr19 | 14682657 | 14682994 | NDUFB7        | ENSG00000099795  | 61    | 0.19 | 0.25 | 0.38 | -0.059 | NA |
| chr19 | 20149855 | 20150175 | ZNF682        | ENSG000000197124 | -1    | 0.21 | 0.27 | 0.39 | -0.057 | NA |
| chr19 | 41317792 | 41318151 | CYP2T2P       | ENSG000000233622 | -676  | 0.85 | 0.75 | 0.39 | 0.096  | NA |
| chr19 | 48111351 | 48113685 | GLTSCR1       | ENSG00000063169  | 1065  | 0.27 | 0.24 | 0.39 | 0.029  | NA |
| chr19 | 1512961  | 1514034  | ADAMTSL5      | ENSG000000185761 | -309  | 0.35 | 0.31 | 0.4  | 0.045  | NA |
| chr19 | 3699950  | 3700616  | PIP5K1C       | ENSG000000186111 | 105   | 0.16 | 0.2  | 0.4  | -0.047 | NA |
| chr19 | 5790551  | 5791291  | DUS3L         | ENSG000000141994 | 328   | 0.14 | 0.23 | 0.4  | -0.086 | NA |
| chr19 | 6361442  | 6362002  | CLPP          | ENSG000000125656 | 259   | 0.23 | 0.19 | 0.4  | 0.034  | NA |
| chr19 | 9648934  | 9649410  | ZNF426        | ENSG000000130818 | 131   | 0.25 | 0.31 | 0.4  | -0.06  | NA |
| chr19 | 19729127 | 19729814 | PBX4          | ENSG000000105717 | -8    | 0.12 | 0.18 | 0.4  | -0.058 | NA |
| chr19 | 36266234 | 36266622 | ARHGAP33      | ENSG00000004777  | 11    | 0.19 | 0.15 | 0.4  | 0.042  | NA |
| chr19 | 42927285 | 42928598 | AC011497.1    | ENSG000000213904 | -480  | 0.2  | 0.23 | 0.4  | -0.033 | NA |
| chr19 | 44952416 | 44952809 | ZNF229        | ENSG000000167383 | 53    | 0.19 | 0.15 | 0.4  | 0.039  | NA |
| chr19 | 45926661 | 45927191 | ERCC1         | ENSG00000012061  | -106  | 0.2  | 0.16 | 0.4  | 0.037  | NA |
| chr19 | 53465730 | 53466323 | ZNF321P       | ENSG000000221874 | 50    | 0.2  | 0.16 | 0.4  | 0.039  | NA |
| chr19 | 58331004 | 58331434 | ZNF587        | ENSG000000198466 | 125   | 0.23 | 0.29 | 0.4  | -0.065 | NA |
| chr19 | 2723168  | 2723390  | DIRAS1        | ENSG000000176490 | -1889 | 0.33 | 0.23 | 0.41 | 0.099  | NA |
| chr19 | 3868586  | 3869217  | ZFR2          | ENSG000000105278 | 125   | 0.18 | 0.26 | 0.41 | -0.084 | NA |
| chr19 | 4472119  | 4473123  | AC011498.1    | ENSG000000167674 | 366   | 0.22 | 0.17 | 0.41 | 0.049  | NA |
| chr19 | 11200919 | 11201686 | LDLR          | ENSG000000130164 | 1163  | 0.19 | 0.16 | 0.41 | 0.029  | NA |
| chr19 | 12944528 | 12945299 | RTBDN         | ENSG000000132026 | 1317  | 0.16 | 0.19 | 0.41 | -0.035 | NA |
| chr19 | 13135317 | 13136169 | NFIX          | ENSG00000008441  | 349   | 0.35 | 0.3  | 0.41 | 0.044  | NA |
| chr19 | 30097065 | 30097279 | POP4          | ENSG000000105171 | 2     | 0.19 | 0.24 | 0.41 | -0.047 | NA |

|       |          |          |            |                 |       |      |      |      |        |    |
|-------|----------|----------|------------|-----------------|-------|------|------|------|--------|----|
| chr19 | 33717512 | 33717930 | SLC7A10    | ENSG00000130876 | -965  | 0.22 | 0.26 | 0.41 | -0.045 | NA |
| chr19 | 34662931 | 34664060 | LSM14A     | ENSG00000105216 | 143   | 0.24 | 0.21 | 0.41 | 0.03   | NA |
| chr19 | 59066151 | 59066662 | CHMP2A     | ENSG00000130724 | 80    | 0.22 | 0.18 | 0.41 | 0.035  | NA |
| chr19 | 632697   | 633678   | POLRMT     | ENSG00000099821 | 381   | 0.27 | 0.22 | 0.42 | 0.046  | NA |
| chr19 | 11372679 | 11373126 | DOCK6      | ENSG00000130158 | 255   | 0.2  | 0.27 | 0.42 | -0.062 | NA |
| chr19 | 41858527 | 41860100 | TGFB1      | ENSG00000105329 | 518   | 0.23 | 0.21 | 0.42 | 0.024  | NA |
| chr19 | 44031127 | 44031504 | ETHE1      | ENSG00000105755 | 81    | 0.18 | 0.24 | 0.42 | -0.056 | NA |
| chr19 | 6392876  | 6393882  | GTF2F1     | ENSG00000125651 | -163  | 0.32 | 0.28 | 0.43 | 0.043  | NA |
| chr19 | 9785480  | 9785806  | ZNF562     | ENSG00000171466 | 113   | 0.17 | 0.26 | 0.43 | -0.088 | NA |
| chr19 | 21949903 | 21950217 | ZNF100     | ENSG00000197020 | 270   | 0.5  | 0.14 | 0.43 | 0.36   | NA |
| chr19 | 33716312 | 33716751 | SLC7A10    | ENSG00000130876 | 225   | 0.16 | 0.2  | 0.43 | -0.04  | NA |
| chr19 | 40732075 | 40732665 | CNTD2      | ENSG00000105219 | 194   | 0.3  | 0.34 | 0.43 | -0.034 | NA |
| chr19 | 58038572 | 58039208 | ZNF549     | ENSG00000121406 | 197   | 0.15 | 0.2  | 0.43 | -0.045 | NA |
| chr19 | 2720630  | 2721783  | DIRAS1     | ENSG00000176490 | 184   | 0.27 | 0.3  | 0.44 | -0.034 | NA |
| chr19 | 10654228 | 10655042 | ATG4D      | ENSG00000130734 | 42    | 0.23 | 0.2  | 0.44 | 0.03   | NA |
| chr19 | 11669789 | 11670244 | ELOF1      | ENSG00000130165 | 35    | 0.19 | 0.14 | 0.44 | 0.043  | NA |
| chr19 | 12792295 | 12792803 | DHPS       | ENSG00000095059 | 128   | 0.21 | 0.26 | 0.44 | -0.043 | NA |
| chr19 | 33864176 | 33865010 | CEBPG      | ENSG00000153879 | -16   | 0.15 | 0.18 | 0.44 | -0.033 | NA |
| chr19 | 35633409 | 35633697 | LGI4       | ENSG00000153902 | -198  | 0.22 | 0.43 | 0.44 | -0.21  | NA |
| chr19 | 37825101 | 37825756 | HKR1       | ENSG00000181666 | -123  | 0.19 | 0.26 | 0.44 | -0.068 | NA |
| chr19 | 42681304 | 42681513 | POU2F2     | ENSG00000028277 | -1231 | 0.15 | 0.36 | 0.44 | -0.2   | NA |
| chr19 | 51843075 | 51843926 | VSIG10L    | ENSG00000186806 | 1878  | 0.18 | 0.16 | 0.44 | 0.022  | NA |
| chr19 | 52839444 | 52839937 | ZNF610     | ENSG00000167554 | 192   | 0.27 | 0.23 | 0.44 | 0.038  | NA |
| chr19 | 55795470 | 55795820 | BRSK1      | ENSG00000160469 | 111   | 0.36 | 0.29 | 0.44 | 0.076  | NA |
| chr19 | 2840864  | 2842213  | ZNF555     | ENSG00000186300 | 105   | 0.18 | 0.2  | 0.45 | -0.018 | NA |
| chr19 | 12175460 | 12176057 | ZNF844     | ENSG00000223547 | 244   | 0.18 | 0.15 | 0.45 | 0.039  | NA |
| chr19 | 17970454 | 17971123 | RPL18A     | ENSG00000105640 | 58    | 0.22 | 0.26 | 0.45 | -0.046 | NA |
| chr19 | 37178104 | 37178589 | AC074138.3 | ENSG00000225975 | -34   | 0.3  | 0.26 | 0.45 | 0.041  | NA |
| chr19 | 38714548 | 38715065 | DPF1       | ENSG00000011332 | -205  | 0.17 | 0.14 | 0.45 | 0.03   | NA |
| chr19 | 45909062 | 45910124 | CD3EAP     | ENSG00000117877 | 126   | 0.19 | 0.23 | 0.45 | -0.037 | NA |

|       |          |          |          |                 |       |      |      |      |        |    |
|-------|----------|----------|----------|-----------------|-------|------|------|------|--------|----|
| chr19 | 47248749 | 47249948 | FKRP     | ENSG00000181027 | 45    | 0.22 | 0.2  | 0.45 | 0.028  | NA |
| chr19 | 58838198 | 58838639 | ZSCAN22  | ENSG00000182318 | 33    | 0.15 | 0.19 | 0.45 | -0.043 | NA |
| chr19 | 2810141  | 2810762  | THOP1    | ENSG00000172009 | 925   | 0.92 | 0.9  | 0.46 | 0.027  | NA |
| chr19 | 11529213 | 11529588 | RGL3     | ENSG00000205517 | 590   | 0.33 | 0.4  | 0.46 | -0.071 | NA |
| chr19 | 40476511 | 40476928 | PSMC4    | ENSG00000013275 | -354  | 0.26 | 0.38 | 0.46 | -0.12  | NA |
| chr19 | 47733884 | 47734806 | BBC3     | ENSG00000105327 | 106   | 0.25 | 0.22 | 0.46 | 0.031  | NA |
| chr19 | 50167690 | 50168198 | IRF3     | ENSG00000126456 | 151   | 0.15 | 0.2  | 0.46 | -0.049 | NA |
| chr19 | 50193020 | 50194798 | C19orf76 | ENSG00000224420 | 814   | 0.25 | 0.27 | 0.46 | -0.02  | NA |
| chr19 | 56108954 | 56109238 | FIZ1     | ENSG00000179943 | 1797  | 0.95 | 0.98 | 0.46 | -0.035 | NA |
| chr19 | 36389545 | 36389967 | NFKBID   | ENSG00000167604 | 1796  | 0.24 | 0.15 | 0.47 | 0.083  | NA |
| chr19 | 38719089 | 38720627 | DPF1     | ENSG00000011332 | 436   | 0.24 | 0.21 | 0.47 | 0.026  | NA |
| chr19 | 40931261 | 40932113 | SERTAD1  | ENSG00000197019 | 245   | 0.36 | 0.32 | 0.47 | 0.037  | NA |
| chr19 | 48673329 | 48673956 | LIG1     | ENSG00000105486 | -106  | 0.19 | 0.26 | 0.47 | -0.068 | NA |
| chr19 | 55865016 | 55865434 | COX6B2   | ENSG00000160471 | 957   | 0.17 | 0.22 | 0.47 | -0.048 | NA |
| chr19 | 6739883  | 6740158  | TRIP10   | ENSG00000125733 | 247   | 0.25 | 0.17 | 0.48 | 0.083  | NA |
| chr19 | 10542662 | 10543120 | PDE4A    | ENSG00000065989 | -220  | 0.35 | 0.31 | 0.48 | 0.047  | NA |
| chr19 | 13873429 | 13873885 | MRI1     | ENSG00000037757 | -1680 | 0.95 | 0.92 | 0.48 | 0.03   | NA |
| chr19 | 33211781 | 33212080 | TDRD12   | ENSG00000173809 | 1251  | 1    | 0.95 | 0.48 | 0.049  | NA |
| chr19 | 51568154 | 51568412 | KLK13    | ENSG00000167759 | 41    | 0.32 | 0.37 | 0.48 | -0.05  | NA |
| chr19 | 52692820 | 52693832 | PPP2R1A  | ENSG00000105568 | 52    | 0.22 | 0.27 | 0.48 | -0.058 | NA |
| chr19 | 10380287 | 10381965 | ICAM1    | ENSG00000090339 | -391  | 0.25 | 0.23 | 0.49 | 0.02   | NA |
| chr19 | 17487895 | 17488125 | PLVAP    | ENSG00000130300 | 138   | 0.5  | 0.8  | 0.49 | -0.3   | NA |
| chr19 | 34175344 | 34175768 | CHST8    | ENSG00000124302 | 122   | 0.12 | 0.17 | 0.49 | -0.053 | NA |
| chr19 | 36500169 | 36500530 | C19orf46 | ENSG00000181392 | -654  | 0.15 | 0.11 | 0.49 | 0.04   | NA |
| chr19 | 45004129 | 45004846 | ZNF180   | ENSG00000167384 | 85    | 0.2  | 0.15 | 0.49 | 0.048  | NA |
| chr19 | 52643037 | 52643274 | ZNF616   | ENSG00000204611 | 36    | 0.43 | 0.17 | 0.49 | 0.26   | NA |
| chr19 | 53898268 | 53898919 | ZNF765   | ENSG00000196417 | 196   | 0.25 | 0.13 | 0.49 | 0.12   | NA |
| chr19 | 1026311  | 1026908  | CNN2     | ENSG00000064666 | -17   | 0.24 | 0.21 | 0.5  | 0.026  | NA |
| chr19 | 1401092  | 1401784  | GAMT     | ENSG00000130005 | 105   | 0.21 | 0.17 | 0.5  | 0.039  | NA |
| chr19 | 2977241  | 2977471  | TLE6     | ENSG00000104953 | -88   | 0.24 | 0.29 | 0.5  | -0.053 | NA |

|       |          |          |            |                 |      |      |      |      |        |    |
|-------|----------|----------|------------|-----------------|------|------|------|------|--------|----|
| chr19 | 5622248  | 5623712  | SAFB2      | ENSG00000130254 | -199 | 0.2  | 0.18 | 0.5  | 0.018  | NA |
| chr19 | 13616752 | 13617267 | CACNA1A    | ENSG00000141837 | 29   | 0.2  | 0.18 | 0.5  | 0.027  | NA |
| chr19 | 36909281 | 36909854 | ZFP82      | ENSG00000181007 | -9   | 0.24 | 0.28 | 0.5  | -0.033 | NA |
| chr19 | 40949148 | 40949548 | SERTAD3    | ENSG00000167565 | -833 | 0.23 | 0.32 | 0.5  | -0.095 | NA |
| chr19 | 46367371 | 46367808 | FOXA3      | ENSG00000170608 | 71   | 0.22 | 0.18 | 0.5  | 0.045  | NA |
| chr19 | 55951800 | 55952103 | SHISA7     | ENSG00000187902 | 1753 | 0.35 | 0.3  | 0.5  | 0.046  | NA |
| chr19 | 58458686 | 58459219 | ZNF256     | ENSG00000152454 | 125  | 0.31 | 0.21 | 0.5  | 0.095  | NA |
| chr19 | 496158   | 496481   | MADCAM1    | ENSG00000099866 | -135 | 0.36 | 0.45 | 0.51 | -0.088 | NA |
| chr19 | 11307495 | 11308276 | KANK2      | ENSG00000197256 | 358  | 0.28 | 0.26 | 0.51 | 0.027  | NA |
| chr19 | 38826819 | 38827349 | CATSPERG   | ENSG00000099338 | 301  | 0.22 | 0.19 | 0.51 | 0.029  | NA |
| chr19 | 42497819 | 42498560 | ATP1A3     | ENSG00000105409 | 33   | 1    | 0.21 | 0.51 | 0.79   | NA |
| chr19 | 45594397 | 45595007 | LRRC68     | ENSG00000104866 | -348 | 0.19 | 0.12 | 0.51 | 0.064  | NA |
| chr19 | 1789459  | 1789880  | ATP8B3     | ENSG00000130270 | 1147 | 0.15 | 0.19 | 0.52 | -0.043 | NA |
| chr19 | 11466008 | 11466317 | AC024575.1 | ENSG00000105520 | 100  | 0.19 | 0.16 | 0.52 | 0.036  | NA |
| chr19 | 12266998 | 12267686 | AC022415.5 | ENSG00000257591 | 187  | 0.25 | 0.2  | 0.52 | 0.051  | NA |
| chr19 | 32836353 | 32836840 | ZNF507     | ENSG00000168813 | 82   | 0.28 | 0.24 | 0.52 | 0.038  | NA |
| chr19 | 45257703 | 45257918 | BCL3       | ENSG00000069399 | -596 | 1    | 0.44 | 0.52 | 0.56   | NA |
| chr19 | 47353614 | 47354150 | AP2S1      | ENSG00000042753 | 321  | 0.25 | 0.15 | 0.52 | 0.097  | NA |
| chr19 | 49660880 | 49661157 | TRPM4      | ENSG00000130529 | -34  | 0.31 | 0.21 | 0.52 | 0.096  | NA |
| chr19 | 53662189 | 53662500 | ZNF347     | ENSG00000197937 | -31  | 0.31 | 0.26 | 0.52 | 0.05   | NA |
| chr19 | 56151516 | 56152792 | ZNF580     | ENSG00000213015 | -238 | 0.28 | 0.24 | 0.52 | 0.036  | NA |
| chr19 | 1407109  | 1408843  | DAZAP1     | ENSG00000071626 | 392  | 0.2  | 0.18 | 0.53 | 0.018  | NA |
| chr19 | 4343266  | 4344027  | MPND       | ENSG00000008382 | 122  | 0.27 | 0.23 | 0.53 | 0.038  | NA |
| chr19 | 13067585 | 13068152 | GADD45GIP1 | ENSG00000179271 | 182  | 0.13 | 0.17 | 0.53 | -0.036 | NA |
| chr19 | 13213450 | 13213821 | LYL1       | ENSG00000104903 | 46   | 0.24 | 0.21 | 0.53 | 0.034  | NA |
| chr19 | 14181430 | 14181758 | AC022098.2 | ENSG00000228887 | 384  | 0.97 | 0.95 | 0.53 | 0.024  | NA |
| chr19 | 44455311 | 44455732 | ZNF221     | ENSG00000159905 | 141  | 0.26 | 0.35 | 0.53 | -0.098 | NA |
| chr19 | 44617490 | 44617831 | ZNF225     | ENSG00000256294 | 112  | 0.19 | 0.24 | 0.53 | -0.049 | NA |
| chr19 | 47103786 | 47104864 | AC011551.1 | ENSG00000230510 | 132  | 0.19 | 0.22 | 0.53 | -0.03  | NA |
| chr19 | 53661430 | 53661848 | ZNF347     | ENSG00000197937 | 674  | 0.36 | 0.24 | 0.53 | 0.12   | NA |



|       |          |          |               |                 |       |      |      |      |        |    |
|-------|----------|----------|---------------|-----------------|-------|------|------|------|--------|----|
| chr19 | 55953371 | 55954641 | SHISA7        | ENSG00000187902 | -302  | 0.17 | 0.15 | 0.53 | 0.021  | NA |
| chr19 | 3770566  | 3770942  | RAX2          | ENSG00000173976 | 1465  | 0.39 | 0.33 | 0.54 | 0.057  | NA |
| chr19 | 23299727 | 23300167 | ZNF730        | ENSG00000183850 | 170   | 0.25 | 0.16 | 0.54 | 0.092  | NA |
| chr19 | 36390613 | 36391589 | NFKBID        | ENSG00000167604 | 451   | 0.19 | 0.25 | 0.54 | -0.053 | NA |
| chr19 | 41035100 | 41035440 | SPTBN4        | ENSG00000160460 | -1125 | 1    | 0.14 | 0.54 | 0.86   | NA |
| chr19 | 47217161 | 47217555 | AC008635.1    | ENSG00000244388 | 746   | 0.18 | 0.14 | 0.54 | 0.045  | NA |
| chr19 | 48281585 | 48282351 | SEPW1         | ENSG00000178980 | 126   | 0.25 | 0.29 | 0.54 | -0.045 | NA |
| chr19 | 49990435 | 49990965 | RPL13A        | ENSG00000142541 | -111  | 0.2  | 0.24 | 0.54 | -0.035 | NA |
| chr19 | 56988313 | 56989741 | ZNF667        | ENSG00000198046 | -291  | 0.24 | 0.22 | 0.54 | 0.023  | NA |
| chr19 | 12777330 | 12777638 | MAN2B1        | ENSG00000104774 | 13    | 0.3  | 0.36 | 0.55 | -0.065 | NA |
| chr19 | 13002417 | 13002656 | GCDH          | ENSG00000105607 | 556   | 0.29 | 0.1  | 0.55 | 0.19   | NA |
| chr19 | 42817412 | 42818038 | TMEM145       | ENSG00000167619 | 248   | 0.21 | 0.25 | 0.55 | -0.042 | NA |
| chr19 | 54024645 | 54024923 | ZNF331        | ENSG00000130844 | -309  | 0.25 | 0.14 | 0.55 | 0.11   | NA |
| chr19 | 54927902 | 54928225 | TTYH1         | ENSG00000167614 | 1049  | 0.4  | 1    | 0.55 | -0.6   | NA |
| chr19 | 56159257 | 56159937 | CCDC106       | ENSG00000173581 | 643   | 0.2  | 0.17 | 0.55 | 0.034  | NA |
| chr19 | 56728588 | 56729375 | CTD-2086L14.1 | ENSG00000242411 | 167   | 0.31 | 0.28 | 0.55 | 0.03   | NA |
| chr19 | 708530   | 708742   | PALM          | ENSG00000099864 | -317  | 0.32 | 0.24 | 0.56 | 0.08   | NA |
| chr19 | 2216346  | 2216741  | DOT1L         | ENSG00000104885 | 378   | 0.93 | 0.9  | 0.56 | 0.027  | NA |
| chr19 | 2430281  | 2430598  | LMNB2         | ENSG00000176619 | 50    | 0.66 | 1    | 0.56 | -0.34  | NA |
| chr19 | 48775008 | 48775341 | ZNF114        | ENSG00000178150 | 520   | 0.28 | 0.24 | 0.56 | 0.041  | NA |
| chr19 | 51227661 | 51228883 | CLEC11A       | ENSG00000105472 | 1628  | 0.2  | 0.18 | 0.56 | 0.019  | NA |
| chr19 | 57702696 | 57703425 | ZNF264        | ENSG00000083844 | 192   | 0.2  | 0.15 | 0.56 | 0.044  | NA |
| chr19 | 2096043  | 2097491  | MOBK2A        | ENSG00000172081 | -498  | 0.27 | 0.25 | 0.57 | 0.021  | NA |
| chr19 | 9945505  | 9946389  | PIN1          | ENSG00000127445 | -52   | 0.22 | 0.2  | 0.57 | 0.023  | NA |
| chr19 | 10362771 | 10363384 | MRPL4         | ENSG00000105364 | 437   | 0.29 | 0.33 | 0.57 | -0.039 | NA |
| chr19 | 18263187 | 18264641 | PIK3R2        | ENSG00000105647 | -14   | 0.25 | 0.27 | 0.57 | -0.028 | NA |
| chr19 | 19495952 | 19497038 | GATAD2A       | ENSG00000167491 | -144  | 0.2  | 0.22 | 0.57 | -0.021 | NA |
| chr19 | 36736021 | 36736884 | ZNF565        | ENSG00000196357 | 707   | 0.21 | 0.19 | 0.57 | 0.025  | NA |
| chr19 | 42811013 | 42811219 | PRR19         | ENSG00000188368 | -1810 | 0.92 | 0.94 | 0.57 | -0.024 | NA |
| chr19 | 45349328 | 45350044 | PVRL2         | ENSG00000130202 | 293   | 0.25 | 0.22 | 0.57 | 0.028  | NA |

|       |          |          |              |                 |       |      |      |      |        |    |
|-------|----------|----------|--------------|-----------------|-------|------|------|------|--------|----|
| chr19 | 49340488 | 49340774 | HSD17B14     | ENSG00000087076 | -697  | 0.27 | 0.23 | 0.57 | 0.04   | NA |
| chr19 | 53030824 | 53031359 | ZNF808       | ENSG00000198482 | 186   | 0.25 | 0.2  | 0.57 | 0.043  | NA |
| chr19 | 54371854 | 54372990 | AC008753.6   | ENSG00000228323 | -61   | 0.25 | 0.23 | 0.57 | 0.02   | NA |
| chr19 | 13858446 | 13858904 | CCDC130      | ENSG00000104957 | -45   | 0.21 | 0.18 | 0.58 | 0.029  | NA |
| chr19 | 36231186 | 36232219 | IGFLR1       | ENSG00000126246 | 1649  | 0.17 | 0.14 | 0.58 | 0.029  | NA |
| chr19 | 47759648 | 47761016 | CCDC9        | ENSG00000105321 | 601   | 0.2  | 0.18 | 0.58 | 0.023  | NA |
| chr19 | 6279483  | 6280231  | MLLT1        | ENSG00000130382 | 102   | 0.2  | 0.17 | 0.59 | 0.026  | NA |
| chr19 | 8478005  | 8478226  | 2-Mar        | ENSG00000099785 | -72   | 0.12 | 0.23 | 0.59 | -0.11  | NA |
| chr19 | 44172916 | 44173252 | PLAUR        | ENSG00000011422 | 1418  | 0.27 | 0.22 | 0.59 | 0.048  | NA |
| chr19 | 54663103 | 54663909 | LENG1        | ENSG00000105617 | 114   | 0.22 | 0.19 | 0.59 | 0.032  | NA |
| chr19 | 58238585 | 58239028 | ZNF671       | ENSG00000083814 | 184   | 0.17 | 0.14 | 0.59 | 0.034  | NA |
| chr19 | 59055376 | 59056482 | TRIM28       | ENSG00000130726 | 93    | 0.21 | 0.17 | 0.59 | 0.046  | NA |
| chr19 | 48894463 | 48894927 | KDELRL1      | ENSG00000105438 | 115   | 0.24 | 0.19 | 0.6  | 0.047  | NA |
| chr19 | 1884768  | 1885608  | FAM108A1     | ENSG00000129968 | 330   | 0.25 | 0.22 | 0.61 | 0.031  | NA |
| chr19 | 10216812 | 10217340 | PPAN-P2RY11  | ENSG00000243207 | 177   | 0.17 | 0.15 | 0.61 | 0.021  | NA |
| chr19 | 12203028 | 12203503 | AC022415.1   | ENSG00000188474 | 187   | 0.18 | 0.23 | 0.61 | -0.054 | NA |
| chr19 | 12900676 | 12901254 | JUNB         | ENSG00000171223 | -1345 | 0.18 | 0.22 | 0.61 | -0.036 | NA |
| chr19 | 12996086 | 12997039 | KLF1         | ENSG00000105610 | 1455  | 0.22 | 0.23 | 0.61 | -0.016 | NA |
| chr19 | 17566532 | 17566778 | AC010319.1   | ENSG00000222805 | -1411 | 0.17 | 0.33 | 0.61 | -0.17  | NA |
| chr19 | 3505820  | 3506770  | FZR1         | ENSG00000105325 | 0     | 0.21 | 0.17 | 0.62 | 0.033  | NA |
| chr19 | 12098571 | 12098950 | CTD-2006C1.2 | ENSG00000219665 | 266   | 0.25 | 0.3  | 0.62 | -0.051 | NA |
| chr19 | 42806136 | 42806871 | PRR19        | ENSG00000188368 | 219   | 0.26 | 0.23 | 0.62 | 0.03   | NA |
| chr19 | 46270699 | 46275167 | SIX5         | ENSG00000177045 | -436  | 0.31 | 0.33 | 0.62 | -0.011 | NA |
| chr19 | 49403222 | 49403618 | NUCB1        | ENSG00000104805 | 113   | 0.34 | 0.25 | 0.62 | 0.091  | NA |
| chr19 | 50143223 | 50143975 | RRAS         | ENSG00000126458 | -199  | 0.3  | 0.26 | 0.62 | 0.038  | NA |
| chr19 | 3500416  | 3500840  | DOHH         | ENSG00000129932 | -7    | 0.26 | 0.23 | 0.63 | 0.037  | NA |
| chr19 | 10713015 | 10713555 | SLC44A2      | ENSG00000129353 | 164   | 0.31 | 0.35 | 0.63 | -0.04  | NA |
| chr19 | 10946516 | 10947416 | TMED1        | ENSG00000099203 | 17    | 0.21 | 0.26 | 0.63 | -0.043 | NA |
| chr19 | 12991690 | 12992508 | DNASE2       | ENSG00000105612 | 164   | 0.19 | 0.17 | 0.63 | 0.024  | NA |
| chr19 | 15542912 | 15543894 | WIZ          | ENSG00000011451 | 93    | 0.19 | 0.17 | 0.63 | 0.02   | NA |

|       |          |          |            |                 |      |      |      |      |        |    |
|-------|----------|----------|------------|-----------------|------|------|------|------|--------|----|
| chr19 | 49375484 | 49375928 | PPP1R15A   | ENSG00000087074 | 57   | 0.22 | 0.2  | 0.63 | 0.029  | NA |
| chr19 | 2785211  | 2785839  | THOP1      | ENSG00000172009 | 19   | 0.18 | 0.21 | 0.64 | -0.032 | NA |
| chr19 | 8274241  | 8275045  | LASS4      | ENSG00000090661 | 415  | 0.17 | 0.19 | 0.64 | -0.018 | NA |
| chr19 | 14182735 | 14184744 | AC022098.1 | ENSG00000141854 | 391  | 0.24 | 0.22 | 0.64 | 0.011  | NA |
| chr19 | 17797530 | 17797748 | UNC13A     | ENSG00000130477 | 1369 | 1    | 0.28 | 0.64 | 0.72   | NA |
| chr19 | 37406931 | 37407463 | ZNF829     | ENSG00000185869 | -4   | 0.23 | 0.32 | 0.64 | -0.081 | NA |
| chr19 | 47987329 | 47987622 | KPTN       | ENSG00000118162 | -56  | 0.23 | 0.12 | 0.64 | 0.11   | NA |
| chr19 | 48972225 | 48973157 | CYTH2      | ENSG00000105443 | 402  | 0.24 | 0.22 | 0.64 | 0.021  | NA |
| chr19 | 50269632 | 50270505 | AP2A1      | ENSG00000196961 | -112 | 0.22 | 0.19 | 0.64 | 0.024  | NA |
| chr19 | 52956656 | 52957245 | ZNF578     | ENSG00000241600 | 121  | 0.3  | 0.25 | 0.64 | 0.045  | NA |
| chr19 | 11450016 | 11450414 | RAB3D      | ENSG00000105514 | 129  | 0.26 | 0.19 | 0.65 | 0.068  | NA |
| chr19 | 11708277 | 11708683 | ZNF627     | ENSG00000198551 | 245  | 0.19 | 0.16 | 0.65 | 0.033  | NA |
| chr19 | 37018919 | 37019811 | ZNF260     | ENSG00000254004 | -198 | 0.22 | 0.29 | 0.65 | -0.07  | NA |
| chr19 | 44037297 | 44038286 | ZNF575     | ENSG00000176472 | 451  | 0.27 | 0.23 | 0.65 | 0.038  | NA |
| chr19 | 57106575 | 57106896 | ZNF71      | ENSG00000197951 | 71   | 0.18 | 0.16 | 0.65 | 0.019  | NA |
| chr19 | 3970847  | 3971478  | DAPK3      | ENSG00000167657 | -124 | 0.23 | 0.21 | 0.66 | 0.027  | NA |
| chr19 | 4723723  | 4723981  | DPP9       | ENSG00000142002 | 3    | 0.22 | 0.19 | 0.66 | 0.036  | NA |
| chr19 | 9938325  | 9938815  | UBL5       | ENSG00000198258 | 2    | 0.19 | 0.17 | 0.66 | 0.015  | NA |
| chr19 | 16582113 | 16583299 | EPS15L1    | ENSG00000127527 | 53   | 0.19 | 0.2  | 0.66 | -0.018 | NA |
| chr19 | 18284521 | 18285023 | IFI30      | ENSG00000216490 | 193  | 0.22 | 0.33 | 0.66 | -0.11  | NA |
| chr19 | 36705433 | 36706262 | ZNF146     | ENSG00000167635 | 343  | 0.22 | 0.16 | 0.66 | 0.057  | NA |
| chr19 | 36869564 | 36870279 | ZFP14      | ENSG00000142065 | 157  | 0.15 | 0.2  | 0.66 | -0.047 | NA |
| chr19 | 46236428 | 46236957 | AC074212.3 | ENSG00000237452 | 183  | 0.97 | 0.96 | 0.66 | 0.016  | NA |
| chr19 | 1862256  | 1862600  | KLF16      | ENSG00000129911 | 1068 | 0.21 | 0.18 | 0.67 | 0.027  | NA |
| chr19 | 2428349  | 2428731  | TIMM13     | ENSG00000099800 | -665 | 0.19 | 0.33 | 0.67 | -0.14  | NA |
| chr19 | 14316090 | 14318456 | LPHN1      | ENSG00000072071 | -301 | 0.33 | 0.36 | 0.67 | -0.022 | NA |
| chr19 | 36612342 | 36612932 | TBCB       | ENSG00000105254 | -160 | 0.91 | 0.89 | 0.67 | 0.02   | NA |
| chr19 | 53237861 | 53238499 | ZNF611     | ENSG00000213020 | 117  | 0.28 | 0.31 | 0.67 | -0.028 | NA |
| chr19 | 1811954  | 1812337  | ATP8B3     | ENSG00000130270 | 54   | 0.13 | 0.11 | 0.68 | 0.015  | NA |
| chr19 | 10463626 | 10464378 | TYK2       | ENSG00000105397 | -189 | 0.76 | 0.74 | 0.68 | 0.022  | NA |

|       |          |          |            |                 |      |      |      |      |        |    |
|-------|----------|----------|------------|-----------------|------|------|------|------|--------|----|
| chr19 | 19516021 | 19517383 | GATAD2A    | ENSG00000167491 | 97   | 0.24 | 0.22 | 0.68 | 0.018  | NA |
| chr19 | 36545001 | 36546065 | THAP8      | ENSG00000161277 | -367 | 0.24 | 0.22 | 0.68 | 0.016  | NA |
| chr19 | 38345808 | 38346160 | AC016582.2 | ENSG00000225868 | -148 | 0.3  | 0.35 | 0.68 | -0.051 | NA |
| chr19 | 42462945 | 42463695 | RABAC1     | ENSG00000105404 | 208  | 0.28 | 0.25 | 0.68 | 0.032  | NA |
| chr19 | 55667532 | 55668465 | TNNI3      | ENSG00000129991 | 1102 | 0.32 | 0.36 | 0.68 | -0.04  | NA |
| chr19 | 572278   | 573134   | BSG        | ENSG00000172270 | 169  | 0.19 | 0.18 | 0.69 | 0.017  | NA |
| chr19 | 984165   | 984866   | WDR18      | ENSG00000065268 | 187  | 0.16 | 0.22 | 0.69 | -0.062 | NA |
| chr19 | 1020511  | 1021395  | C19orf6    | ENSG00000182087 | 188  | 0.19 | 0.2  | 0.69 | -0.013 | NA |
| chr19 | 7069396  | 7069921  | ZNF557     | ENSG00000130544 | 187  | 0.19 | 0.24 | 0.69 | -0.055 | NA |
| chr19 | 8454831  | 8455845  | RAB11B     | ENSG00000185236 | 133  | 0.24 | 0.22 | 0.69 | 0.029  | NA |
| chr19 | 12035899 | 12036433 | ZNF700     | ENSG00000196757 | 266  | 0.18 | 0.17 | 0.69 | 0.014  | NA |
| chr19 | 38893480 | 38894383 | FAM98C     | ENSG00000130244 | 156  | 0.18 | 0.17 | 0.69 | 0.018  | NA |
| chr19 | 48306462 | 48306705 | TPRX1      | ENSG00000178928 | 232  | 1    | 0.77 | 0.69 | 0.23   | NA |
| chr19 | 507457   | 508079   | C19orf20   | ENSG00000141933 | 271  | 0.2  | 0.18 | 0.7  | 0.021  | NA |
| chr19 | 3224743  | 3225007  | CELF5      | ENSG00000161082 | 173  | 0.26 | 0.28 | 0.7  | -0.027 | NA |
| chr19 | 47551387 | 47552137 | TMEM160    | ENSG00000130748 | 120  | 0.19 | 0.21 | 0.7  | -0.023 | NA |
| chr19 | 49138699 | 49139085 | DBP        | ENSG00000105516 | 1747 | 0.17 | 0.14 | 0.7  | 0.03   | NA |
| chr19 | 56000722 | 56001026 | SSC5D      | ENSG00000179954 | 940  | 0.49 | 0.53 | 0.7  | -0.043 | NA |
| chr19 | 13044191 | 13044665 | FARSA      | ENSG00000179115 | 100  | 0.18 | 0.14 | 0.71 | 0.035  | NA |
| chr19 | 18794191 | 18794819 | CRTC1      | ENSG00000105662 | 80   | 0.21 | 0.19 | 0.71 | 0.025  | NA |
| chr19 | 40502749 | 40503294 | ZNF546     | ENSG00000187187 | 78   | 0.24 | 0.27 | 0.71 | -0.025 | NA |
| chr19 | 58089801 | 58090524 | ZNF416     | ENSG00000083817 | 81   | 0.2  | 0.18 | 0.71 | 0.02   | NA |
| chr19 | 1848058  | 1848776  | REXO1      | ENSG00000079313 | 35   | 0.17 | 0.16 | 0.72 | 0.017  | NA |
| chr19 | 4123521  | 4124346  | MAP2K2     | ENSG00000126934 | 181  | 0.28 | 0.26 | 0.72 | 0.022  | NA |
| chr19 | 18062912 | 18063314 | KCNN1      | ENSG00000105642 | 19   | 0.17 | 0.15 | 0.72 | 0.017  | NA |
| chr19 | 40854180 | 40854733 | C19orf47   | ENSG00000160392 | -163 | 0.19 | 0.17 | 0.72 | 0.025  | NA |
| chr19 | 45504865 | 45505299 | RELB       | ENSG00000104856 | 363  | 0.24 | 0.22 | 0.72 | 0.023  | NA |
| chr19 | 56652191 | 56652684 | ZNF444     | ENSG00000167685 | -119 | 0.27 | 0.22 | 0.72 | 0.043  | NA |
| chr19 | 58111229 | 58111770 | ZNF530     | ENSG00000183647 | 246  | 0.19 | 0.17 | 0.72 | 0.02   | NA |
| chr19 | 59086697 | 59087299 | AC016629.2 | ENSG00000213753 | 186  | 0.18 | 0.2  | 0.72 | -0.018 | NA |

|       |          |          |            |                 |       |      |      |      |         |    |
|-------|----------|----------|------------|-----------------|-------|------|------|------|---------|----|
| chr19 | 1046249  | 1047701  | ABCA7      | ENSG00000064687 | 1444  | 0.9  | 0.91 | 0.73 | -0.0098 | NA |
| chr19 | 2050630  | 2051566  | MKNK2      | ENSG00000099875 | -246  | 0.21 | 0.22 | 0.73 | -0.015  | NA |
| chr19 | 6710625  | 6710828  | C3         | ENSG00000125730 | 242   | 0.22 | 0.29 | 0.73 | -0.066  | NA |
| chr19 | 10304966 | 10305864 | DNMT1      | ENSG00000130816 | 340   | 0.17 | 0.16 | 0.73 | 0.015   | NA |
| chr19 | 11545948 | 11546544 | CCDC151    | ENSG00000198003 | -266  | 0.15 | 0.19 | 0.73 | -0.04   | NA |
| chr19 | 12721532 | 12722116 | ZNF490     | ENSG00000188033 | -207  | 0.21 | 0.23 | 0.73 | -0.021  | NA |
| chr19 | 18668474 | 18668937 | C19orf50   | ENSG00000105700 | 133   | 0.27 | 0.34 | 0.73 | -0.063  | NA |
| chr19 | 33622910 | 33623231 | WDR88      | ENSG00000166359 | 72    | 0.93 | 0.91 | 0.73 | 0.017   | NA |
| chr19 | 42757495 | 42759475 | ERF        | ENSG00000105722 | 302   | 0.21 | 0.22 | 0.73 | -0.01   | NA |
| chr19 | 10697786 | 10698099 | AP1M2      | ENSG00000129354 | 50    | 0.55 | 0.47 | 0.74 | 0.086   | NA |
| chr19 | 11909402 | 11909841 | ZNF491     | ENSG00000177599 | 218   | 0.31 | 0.29 | 0.74 | 0.021   | NA |
| chr19 | 38270279 | 38270617 | ZNF573     | ENSG00000189144 | 70    | 0.35 | 0.42 | 0.74 | -0.063  | NA |
| chr19 | 38810376 | 38810949 | KCNK6      | ENSG00000099337 | 180   | 0.23 | 0.2  | 0.74 | 0.028   | NA |
| chr19 | 45681323 | 45683156 | TRAPPC6A   | ENSG00000007255 | -754  | 0.24 | 0.23 | 0.74 | 0.013   | NA |
| chr19 | 46404537 | 46406545 | MYPOP      | ENSG00000176182 | 321   | 0.25 | 0.27 | 0.74 | -0.019  | NA |
| chr19 | 55880577 | 55880922 | IL11       | ENSG00000095752 | 1065  | 0.22 | 0.19 | 0.74 | 0.028   | NA |
| chr19 | 14543873 | 14544704 | PKN1       | ENSG00000123143 | 119   | 0.2  | 0.19 | 0.75 | 0.012   | NA |
| chr19 | 17581190 | 17581675 | SLC27A1    | ENSG00000130304 | 132   | 0.16 | 0.2  | 0.75 | -0.034  | NA |
| chr19 | 18896515 | 18896860 | COMP       | ENSG00000105664 | 1157  | 0.31 | 0.35 | 0.75 | -0.038  | NA |
| chr19 | 46087866 | 46088345 | OPA3       | ENSG00000125741 | -5    | 0.19 | 0.24 | 0.75 | -0.048  | NA |
| chr19 | 2163632  | 2165603  | DOT1L      | ENSG00000104885 | 469   | 0.24 | 0.23 | 0.76 | 0.011   | NA |
| chr19 | 2328364  | 2329089  | LSM7       | ENSG00000130332 | -112  | 0.19 | 0.21 | 0.76 | -0.013  | NA |
| chr19 | 37463991 | 37464606 | ZNF568     | ENSG00000198453 | 181   | 0.24 | 0.22 | 0.76 | 0.029   | NA |
| chr19 | 50083757 | 50083986 | NOSIP      | ENSG00000142546 | -68   | 0.2  | 0.17 | 0.76 | 0.027   | NA |
| chr19 | 50879606 | 50880094 | NR1H2      | ENSG00000131408 | 165   | 0.25 | 0.27 | 0.76 | -0.025  | NA |
| chr19 | 55677520 | 55678216 | C19orf51   | ENSG00000167646 | 52    | 0.23 | 0.26 | 0.76 | -0.028  | NA |
| chr19 | 58739943 | 58740554 | ZNF544     | ENSG00000198131 | 178   | 0.26 | 0.24 | 0.76 | 0.019   | NA |
| chr19 | 1753216  | 1755606  | ONECUT3    | ENSG00000205922 | 749   | 0.21 | 0.2  | 0.77 | 0.008   | NA |
| chr19 | 3606371  | 3607270  | TBXA2R     | ENSG00000006638 | 11    | 0.21 | 0.19 | 0.77 | 0.018   | NA |
| chr19 | 30015781 | 30021367 | AC011474.1 | ENSG00000245448 | -1913 | 0.26 | 0.25 | 0.77 | 0.0055  | NA |

|       |          |          |            |                 |       |      |      |      |         |    |
|-------|----------|----------|------------|-----------------|-------|------|------|------|---------|----|
| chr19 | 53836795 | 53837495 | ZNF845     | ENSG00000213799 | 143   | 0.18 | 0.21 | 0.77 | -0.023  | NA |
| chr19 | 58962740 | 58963343 | ZNF324B    | ENSG00000249471 | 70    | 0.32 | 0.35 | 0.77 | -0.028  | NA |
| chr19 | 860517   | 862123   | CFD        | ENSG00000197766 | 1655  | 0.3  | 0.31 | 0.78 | -0.0082 | NA |
| chr19 | 4831433  | 4831892  | TICAM1     | ENSG00000127666 | 75    | 0.19 | 0.21 | 0.78 | -0.021  | NA |
| chr19 | 20011910 | 20012238 | ZNF93      | ENSG00000184635 | 319   | 0.18 | 0.11 | 0.78 | 0.064   | NA |
| chr19 | 40723104 | 40724389 | TTC9B      | ENSG00000174521 | 560   | 0.24 | 0.22 | 0.78 | 0.014   | NA |
| chr19 | 49999252 | 49999839 | RPS11      | ENSG00000142534 | -89   | 0.21 | 0.18 | 0.78 | 0.026   | NA |
| chr19 | 52674327 | 52674855 | ZNF836     | ENSG00000196267 | 305   | 0.16 | 0.18 | 0.78 | -0.024  | NA |
| chr19 | 53635625 | 53636230 | ZNF415     | ENSG00000170954 | 218   | 0.24 | 0.22 | 0.78 | 0.02    | NA |
| chr19 | 12163326 | 12163560 | AC022415.4 | ENSG00000257446 | 311   | 0.3  | 0.25 | 0.79 | 0.046   | NA |
| chr19 | 18433642 | 18434178 | LSM4       | ENSG00000130520 | 91    | 0.15 | 0.14 | 0.79 | 0.0094  | NA |
| chr19 | 18899037 | 18902284 | COMP       | ENSG00000105664 | 1014  | 0.24 | 0.25 | 0.79 | -0.006  | NA |
| chr19 | 47214063 | 47214304 | MIR320E    | ENSG00000211513 | -1576 | 0.89 | 0.87 | 0.79 | 0.026   | NA |
| chr19 | 1248183  | 1251179  | MIDN       | ENSG00000167470 | 1129  | 0.23 | 0.22 | 0.8  | 0.0064  | NA |
| chr19 | 1615202  | 1615812  | U6         | ENSG00000252933 | 1087  | 0.94 | 0.88 | 0.8  | 0.055   | NA |
| chr19 | 2150990  | 2151963  | AP3D1      | ENSG00000065000 | 63    | 0.21 | 0.22 | 0.8  | -0.011  | NA |
| chr19 | 3061188  | 3061952  | AES        | ENSG00000104964 | 801   | 0.19 | 0.21 | 0.8  | -0.013  | NA |
| chr19 | 11689417 | 11689768 | ACP5       | ENSG00000102575 | 209   | 0.32 | 0.34 | 0.8  | -0.018  | NA |
| chr19 | 34112279 | 34114353 | CHST8      | ENSG00000124302 | 455   | 0.2  | 0.2  | 0.8  | 0.0062  | NA |
| chr19 | 39440404 | 39441011 | FBXO17     | ENSG00000104835 | -212  | 0.24 | 0.26 | 0.8  | -0.022  | NA |
| chr19 | 42829555 | 42830597 | MEGF8      | ENSG00000105429 | 315   | 0.19 | 0.18 | 0.8  | 0.011   | NA |
| chr19 | 49496448 | 49496773 | GYS1       | ENSG00000104812 | -70   | 0.24 | 0.2  | 0.8  | 0.042   | NA |
| chr19 | 710822   | 711066   | PALM       | ENSG00000099864 | 1991  | 0.24 | 0.2  | 0.81 | 0.036   | NA |
| chr19 | 13228886 | 13229576 | NACC1      | ENSG00000160877 | 122   | 0.22 | 0.24 | 0.81 | -0.018  | NA |
| chr19 | 16738315 | 16739679 | MED26      | ENSG00000105085 | -243  | 0.24 | 0.25 | 0.81 | -0.01   | NA |
| chr19 | 35491151 | 35492020 | GRAMD1A    | ENSG00000089351 | 358   | 0.19 | 0.18 | 0.81 | 0.01    | NA |
| chr19 | 44123485 | 44124244 | ZNF428     | ENSG00000131116 | -107  | 0.18 | 0.16 | 0.81 | 0.02    | NA |
| chr19 | 42700686 | 42700975 | POU2F2     | ENSG00000028277 | -93   | 0.95 | 1    | 0.82 | -0.053  | NA |
| chr19 | 47139337 | 47139547 | GNG8       | ENSG00000167414 | -1503 | 0.46 | 0.43 | 0.82 | 0.024   | NA |
| chr19 | 56154791 | 56155117 | ZNF581     | ENSG00000171425 | -32   | 0.18 | 0.2  | 0.82 | -0.025  | NA |

|       |          |          |               |                 |       |      |      |      |        |    |
|-------|----------|----------|---------------|-----------------|-------|------|------|------|--------|----|
| chr19 | 925120   | 926816   | ARID3A        | ENSG00000116017 | -69   | 0.29 | 0.28 | 0.83 | 0.0083 | NA |
| chr19 | 2432847  | 2435203  | LMNB2         | ENSG00000176619 | -128  | 0.93 | 0.92 | 0.83 | 0.0062 | NA |
| chr19 | 7968325  | 7969421  | AC010336.2    | ENSG00000214248 | -446  | 0.2  | 0.18 | 0.83 | 0.016  | NA |
| chr19 | 11849359 | 11849796 | ZNF823        | ENSG00000197933 | 183   | 0.2  | 0.22 | 0.83 | -0.021 | NA |
| chr19 | 14062785 | 14063430 | DCAF15        | ENSG00000132017 | -212  | 0.24 | 0.22 | 0.83 | 0.021  | NA |
| chr19 | 35645597 | 35646047 | FXVD5         | ENSG00000089327 | 189   | 0.22 | 0.26 | 0.83 | -0.035 | NA |
| chr19 | 40696811 | 40698193 | MAP3K10       | ENSG00000130758 | -149  | 0.21 | 0.21 | 0.83 | 0.0088 | NA |
| chr19 | 44079582 | 44079905 | XRCC1         | ENSG00000073050 | -35   | 0.16 | 0.15 | 0.83 | 0.017  | NA |
| chr19 | 46001830 | 46002686 | PPM1N         | ENSG00000213889 | 393   | 0.22 | 0.21 | 0.83 | 0.017  | NA |
| chr19 | 47126782 | 47127478 | PTGIR         | ENSG00000160013 | 1224  | 0.97 | 0.96 | 0.83 | 0.01   | NA |
| chr19 | 50831454 | 50832070 | KCNC3         | ENSG00000131398 | 741   | 0.2  | 0.18 | 0.83 | 0.027  | NA |
| chr19 | 7504923  | 7505186  | ARHGEF18      | ENSG00000104880 | 480   | 0.99 | 1    | 0.84 | -0.014 | NA |
| chr19 | 12779795 | 12781094 | WDR83         | ENSG00000123154 | 77    | 0.23 | 0.22 | 0.84 | 0.0094 | NA |
| chr19 | 14016665 | 14017435 | C19orf57      | ENSG00000132016 | -141  | 0.22 | 0.24 | 0.84 | -0.018 | NA |
| chr19 | 23945713 | 23946128 | RP11-255H23.2 | ENSG00000233836 | 174   | 0.23 | 0.28 | 0.84 | -0.045 | NA |
| chr19 | 46800053 | 46800603 | HIF3A         | ENSG00000124440 | 25    | 0.3  | 0.22 | 0.84 | 0.074  | NA |
| chr19 | 48949034 | 48949442 | GRWD1         | ENSG00000105447 | 208   | 0.31 | 0.29 | 0.84 | 0.019  | NA |
| chr19 | 57831599 | 57832250 | ZNF543        | ENSG00000178229 | 59    | 0.19 | 0.17 | 0.84 | 0.022  | NA |
| chr19 | 3185740  | 3186492  | NCLN          | ENSG00000125912 | 241   | 0.18 | 0.19 | 0.85 | -0.012 | NA |
| chr19 | 3933473  | 3933816  | ITGB1BP3      | ENSG00000077009 | 106   | 0.2  | 0.22 | 0.85 | -0.025 | NA |
| chr19 | 6502090  | 6502411  | TUBB4         | ENSG00000104833 | 54    | 0.2  | 0.19 | 0.85 | 0.014  | NA |
| chr19 | 9608804  | 9609343  | ZNF560        | ENSG00000198028 | 206   | 0.17 | 0.19 | 0.85 | -0.022 | NA |
| chr19 | 10823618 | 10823878 | DNM2          | ENSG00000079805 | -395  | 0.94 | 0.96 | 0.85 | -0.023 | NA |
| chr19 | 11959577 | 11960064 | ZNF439        | ENSG00000171291 | -58   | 0.28 | 0.31 | 0.85 | -0.025 | NA |
| chr19 | 28284528 | 28285129 | AC006504.2    | ENSG00000247687 | 20    | 0.19 | 0.22 | 0.85 | -0.027 | NA |
| chr19 | 45540657 | 45541055 | CLASRP        | ENSG00000104859 | -1442 | 0.93 | 0.91 | 0.85 | 0.016  | NA |
| chr19 | 45579321 | 45580018 | ZNF296        | ENSG00000170684 | 19    | 0.16 | 0.14 | 0.85 | 0.012  | NA |
| chr19 | 1555010  | 1555213  | AC027307.1    | ENSG00000222720 | -1493 | 0.88 | 1    | 0.86 | -0.12  | NA |
| chr19 | 35263648 | 35264275 | ZNF599        | ENSG00000153896 | 135   | 0.2  | 0.19 | 0.86 | 0.012  | NA |
| chr19 | 49014611 | 49014940 | LMTK3         | ENSG00000142235 | 1671  | 0.23 | 0.2  | 0.86 | 0.035  | NA |

|       |          |          |              |                 |       |      |      |      |         |    |
|-------|----------|----------|--------------|-----------------|-------|------|------|------|---------|----|
| chr19 | 52642613 | 52642841 | ZNF616       | ENSG00000204611 | 464   | 0.19 | 0.22 | 0.86 | -0.024  | NA |
| chr19 | 55690182 | 55691623 | SYT5         | ENSG00000129990 | -144  | 0.23 | 0.22 | 0.86 | 0.01    | NA |
| chr19 | 640789   | 641005   | FGF22        | ENSG00000070388 | -281  | 0.89 | 0.93 | 0.87 | -0.035  | NA |
| chr19 | 1390693  | 1391304  | AC005329.6   | ENSG00000176936 | -1348 | 0.96 | 0.95 | 0.87 | 0.0082  | NA |
| chr19 | 22817274 | 22817546 | ZNF492       | ENSG00000229676 | 284   | 0.43 | 0.25 | 0.87 | 0.18    | NA |
| chr19 | 37288342 | 37288723 | AC020928.2   | ENSG00000247207 | 112   | 0.14 | 0.17 | 0.87 | -0.027  | NA |
| chr19 | 37957726 | 37958390 | ZNF569       | ENSG00000196437 | 281   | 0.16 | 0.18 | 0.87 | -0.012  | NA |
| chr19 | 49865341 | 49865690 | TEAD2        | ENSG00000074219 | 183   | 0.14 | 0.16 | 0.87 | -0.013  | NA |
| chr19 | 4791194  | 4793217  | FEM1A        | ENSG00000141965 | 477   | 0.47 | 0.46 | 0.88 | 0.0066  | NA |
| chr19 | 19314137 | 19314416 | NR2C2AP      | ENSG00000184162 | -121  | 0.25 | 0.2  | 0.88 | 0.047   | NA |
| chr19 | 37959852 | 37960615 | ZNF570       | ENSG00000171827 | 251   | 0.35 | 0.33 | 0.88 | 0.022   | NA |
| chr19 | 42637277 | 42637684 | CTC-378H22.1 | ENSG00000254887 | 773   | 0.26 | 0.23 | 0.88 | 0.031   | NA |
| chr19 | 45312059 | 45312397 | BCAM         | ENSG00000187244 | -110  | 0.15 | 0.17 | 0.88 | -0.016  | NA |
| chr19 | 56825767 | 56826786 | ZSCAN5A      | ENSG00000131848 | 18    | 0.16 | 0.15 | 0.88 | 0.01    | NA |
| chr19 | 344164   | 344458   | MIER2        | ENSG00000105556 | 480   | 0.22 | 0.21 | 0.89 | 0.013   | NA |
| chr19 | 1566554  | 1568834  | MEX3D        | ENSG00000181588 | 182   | 0.21 | 0.22 | 0.89 | -0.0048 | NA |
| chr19 | 4304542  | 4305122  | FSD1         | ENSG00000105255 | 241   | 0.23 | 0.25 | 0.89 | -0.019  | NA |
| chr19 | 19174262 | 19174995 | SLC25A42     | ENSG00000181035 | -175  | 0.22 | 0.24 | 0.89 | -0.017  | NA |
| chr19 | 49954763 | 49955185 | PIH1D1       | ENSG00000104872 | 141   | 0.27 | 0.26 | 0.89 | 0.02    | NA |
| chr19 | 4198017  | 4198654  | ANKRD24      | ENSG00000089847 | 198   | 0.24 | 0.23 | 0.9  | 0.0093  | NA |
| chr19 | 4535069  | 4535339  | PLIN5        | ENSG00000214456 | 4     | 0.26 | 0.25 | 0.9  | 0.013   | NA |
| chr19 | 12076029 | 12076366 | ZNF763       | ENSG00000197054 | 300   | 0.2  | 0.25 | 0.9  | -0.046  | NA |
| chr19 | 12273794 | 12274291 | ZNF136       | ENSG00000196646 | 163   | 0.26 | 0.28 | 0.9  | -0.021  | NA |
| chr19 | 12949131 | 12949733 | MAST1        | ENSG00000105613 | 173   | 0.19 | 0.2  | 0.9  | -0.016  | NA |
| chr19 | 45147074 | 45147721 | PVR          | ENSG00000073008 | 299   | 0.2  | 0.21 | 0.9  | -0.0091 | NA |
| chr19 | 48216486 | 48216837 | EHD2         | ENSG00000024422 | 60    | 0.2  | 0.24 | 0.9  | -0.038  | NA |
| chr19 | 50097744 | 50098453 | PRR12        | ENSG00000126464 | -681  | 0.88 | 0.87 | 0.9  | 0.011   | NA |
| chr19 | 54496202 | 54496612 | CACNG6       | ENSG00000130433 | 275   | 0.73 | 0.69 | 0.9  | 0.036   | NA |
| chr19 | 58978209 | 58978958 | ZNF324       | ENSG00000083812 | 124   | 0.17 | 0.17 | 0.9  | 0.0074  | NA |
| chr19 | 6373427  | 6373631  | ALKBH7       | ENSG00000125652 | 1085  | 0.33 | 0.14 | 0.91 | 0.19    | NA |



|       |          |          |            |                 |       |      |      |      |         |    |
|-------|----------|----------|------------|-----------------|-------|------|------|------|---------|----|
| chr19 | 16635980 | 16636825 | CHERP      | ENSG00000085872 | 683   | 0.97 | 0.96 | 0.91 | 0.0094  | NA |
| chr19 | 30156038 | 30156795 | PLEKHF1    | ENSG00000166289 | 89    | 0.2  | 0.19 | 0.91 | 0.018   | NA |
| chr19 | 34012271 | 34012936 | PEPD       | ENSG00000124299 | 196   | 0.21 | 0.2  | 0.91 | 0.0079  | NA |
| chr19 | 44405817 | 44406053 | AC006213.1 | ENSG00000247377 | 22    | 0.27 | 0.3  | 0.91 | -0.028  | NA |
| chr19 | 54023868 | 54024560 | ZNF331     | ENSG00000130844 | -21   | 0.34 | 0.31 | 0.91 | 0.034   | NA |
| chr19 | 54704584 | 54705204 | RPS9       | ENSG00000170889 | 284   | 0.2  | 0.21 | 0.91 | -0.012  | NA |
| chr19 | 588250   | 588622   | HCN2       | ENSG00000099822 | -1457 | 0.16 | 0.17 | 0.92 | -0.014  | NA |
| chr19 | 1274469  | 1276358  | C19orf24   | ENSG00000228300 | -25   | 0.29 | 0.29 | 0.92 | 0.0038  | NA |
| chr19 | 7701661  | 7702336  | STXBP2     | ENSG00000076944 | 7     | 0.22 | 0.23 | 0.92 | -0.012  | NA |
| chr19 | 19143924 | 19144827 | SUGP2      | ENSG00000064607 | -76   | 0.2  | 0.21 | 0.92 | -0.0086 | NA |
| chr19 | 19779475 | 19780146 | ZNF101     | ENSG00000181896 | 205   | 0.27 | 0.29 | 0.92 | -0.015  | NA |
| chr19 | 22018594 | 22018827 | ZNF43      | ENSG00000198521 | 267   | 0.18 | 0.19 | 0.92 | -0.016  | NA |
| chr19 | 38145826 | 38147219 | ZFP30      | ENSG00000120784 | -233  | 0.33 | 0.35 | 0.92 | -0.021  | NA |
| chr19 | 38182793 | 38183327 | ZNF781     | ENSG00000196381 | 156   | 0.2  | 0.18 | 0.92 | 0.02    | NA |
| chr19 | 39971346 | 39971718 | TIMM50     | ENSG00000105197 | 14    | 0.2  | 0.23 | 0.92 | -0.03   | NA |
| chr19 | 33685146 | 33686085 | LRP3       | ENSG00000130881 | 449   | 0.19 | 0.19 | 0.93 | 0.0057  | NA |
| chr19 | 12405197 | 12405571 | ZNF44      | ENSG00000197857 | 225   | 0.33 | 0.28 | 0.93 | 0.058   | NA |
| chr19 | 37742738 | 37743029 | AC012309.5 | ENSG00000226686 | 55    | 0.23 | 0.15 | 0.93 | 0.073   | NA |
| chr19 | 4457493  | 4458040  | UBXN6      | ENSG00000167671 | 25    | 0.21 | 0.21 | 0.94 | 0.0072  | NA |
| chr19 | 12146030 | 12146649 | ZNF433     | ENSG00000197647 | 145   | 0.34 | 0.31 | 0.94 | 0.03    | NA |
| chr19 | 17830104 | 17830646 | MAP1S      | ENSG00000130479 | 84    | 0.2  | 0.19 | 0.94 | 0.0084  | NA |
| chr19 | 19754284 | 19754507 | GMIP       | ENSG00000089639 | 19    | 0.27 | 0.3  | 0.94 | -0.03   | NA |
| chr19 | 19773991 | 19774767 | ATP13A1    | ENSG00000105726 | -338  | 0.21 | 0.21 | 0.94 | 0.0048  | NA |
| chr19 | 45849852 | 45850054 | KLC3       | ENSG00000104892 | 1295  | 0.19 | 0.17 | 0.94 | 0.02    | NA |
| chr19 | 35521162 | 35522051 | SCN1B      | ENSG00000105711 | 14    | 0.19 | 0.18 | 0.95 | 0.0045  | NA |
| chr19 | 40790737 | 40791607 | AKT2       | ENSG00000105221 | -314  | 0.22 | 0.21 | 0.95 | 0.011   | NA |
| chr19 | 56135773 | 56136007 | ZNF784     | ENSG00000179922 | 51    | 0.19 | 0.21 | 0.95 | -0.014  | NA |
| chr19 | 58399945 | 58400276 | ZNF814     | ENSG00000204514 | 332   | 0.19 | 0.21 | 0.95 | -0.015  | NA |
| chr19 | 821345   | 822669   | MIR3187    | ENSG00000129951 | -317  | 0.23 | 0.23 | 0.96 | 0.0047  | NA |
| chr19 | 1066866  | 1067673  | HMHA1      | ENSG00000180448 | 95    | 0.19 | 0.2  | 0.96 | -0.0051 | NA |

|       |          |          |            |                 |      |      |      |      |         |    |
|-------|----------|----------|------------|-----------------|------|------|------|------|---------|----|
| chr19 | 10046824 | 10047067 | OLFM2      | ENSG00000105088 | 125  | 0.22 | 0.23 | 0.96 | -0.017  | NA |
| chr19 | 17336906 | 17337868 | OCEL1      | ENSG00000099330 | 332  | 0.23 | 0.22 | 0.96 | 0.0074  | NA |
| chr19 | 17798679 | 17799329 | UNC13A     | ENSG00000130477 | 4    | 0.26 | 0.27 | 0.96 | -0.0092 | NA |
| chr19 | 17952196 | 17953474 | JAK3       | ENSG00000105639 | 499  | 0.17 | 0.17 | 0.96 | 0.007   | NA |
| chr19 | 18632298 | 18633453 | ELL        | ENSG00000105656 | 62   | 0.21 | 0.19 | 0.96 | 0.012   | NA |
| chr19 | 49183498 | 49184167 | AC008888.7 | ENSG00000232871 | 494  | 0.97 | 0.96 | 0.96 | 0.0055  | NA |
| chr19 | 51522004 | 51522803 | KLK10      | ENSG00000129451 | 551  | 0.26 | 0.25 | 0.96 | 0.0085  | NA |
| chr19 | 843468   | 844085   | PRTN3      | ENSG00000196415 | 435  | 0.19 | 0.21 | 0.97 | -0.015  | NA |
| chr19 | 7553699  | 7554033  | PEX11G     | ENSG00000104883 | 39   | 0.16 | 0.16 | 0.97 | -0.006  | NA |
| chr19 | 7735081  | 7735456  | RETN       | ENSG00000104918 | 1055 | 0.23 | 0.22 | 0.97 | 0.0085  | NA |
| chr19 | 11639614 | 11639897 | ECSIT      | ENSG00000130159 | 232  | 0.21 | 0.25 | 0.97 | -0.035  | NA |
| chr19 | 18277954 | 18278164 | PIK3R2     | ENSG00000105647 | 1093 | 0.81 | 0.85 | 0.97 | -0.037  | NA |
| chr19 | 39660153 | 39660362 | PAK4       | ENSG00000130669 | 1006 | 0.95 | 0.94 | 0.97 | 0.01    | NA |
| chr19 | 50379396 | 50381565 | AKT1S1     | ENSG00000204673 | -974 | 0.18 | 0.18 | 0.97 | -0.0041 | NA |
| chr19 | 58629309 | 58630241 | ZSCAN18    | ENSG00000121413 | 18   | 0.25 | 0.24 | 0.97 | 0.012   | NA |
| chr19 | 15310519 | 15312027 | NOTCH3     | ENSG00000074181 | 519  | 0.24 | 0.23 | 0.98 | 0.0058  | NA |
| chr19 | 29703570 | 29704331 | UQCRFS1    | ENSG00000169021 | 186  | 0.17 | 0.17 | 0.98 | 0.006   | NA |
| chr19 | 51161923 | 51162514 | AC008743.7 | ENSG00000235034 | 465  | 0.22 | 0.23 | 0.98 | -0.0083 | NA |
| chr19 | 58361139 | 58361560 | ZNF587     | ENSG00000198466 | 121  | 0.18 | 0.16 | 0.98 | 0.016   | NA |
| chr19 | 675671   | 675881   | FSTL3      | ENSG00000070404 | -613 | 0.25 | 0.18 | 0.99 | 0.07    | NA |
| chr19 | 4102299  | 4103041  | MAP2K2     | ENSG00000126934 | -168 | 0.88 | 0.87 | 0.99 | 0.01    | NA |
| chr19 | 9929166  | 9930494  | FBXL12     | ENSG00000127452 | -99  | 0.18 | 0.18 | 0.99 | 0.0029  | NA |
| chr19 | 10047262 | 10047478 | OLFM2      | ENSG00000105088 | -300 | 0.18 | 0.15 | 0.99 | 0.028   | NA |
| chr19 | 18331046 | 18331395 | PDE4C      | ENSG00000105650 | 751  | 0.87 | 0.89 | 0.99 | -0.024  | NA |
| chr19 | 33182609 | 33183562 | NUDT19     | ENSG00000213965 | 218  | 0.16 | 0.16 | 0.99 | 0.0036  | NA |
| chr19 | 39935931 | 39936638 | SUPT5H     | ENSG00000196235 | 98   | 0.29 | 0.28 | 0.99 | 0.01    | NA |
| chr19 | 55574138 | 55574734 | RDH13      | ENSG00000160439 | 149  | 0.19 | 0.19 | 1    | -0.0007 | NA |
| chr19 | 58982329 | 58983512 | ZNF324     | ENSG00000083812 | 635  | 0.93 | 0.93 | 1    | -0.0032 | NA |
| chr19 | 453728   | 453971   | 5S_rRNA    | ENSG00000252539 | 715  | 0.91 | 0.88 | 1    | 0.033   | NA |
| chr19 | 891531   | 892150   | MED16      | ENSG00000175221 | 1360 | 0.53 | 0.6  | 1    | -0.07   | NA |

|       |          |          |            |                 |       |      |      |   |         |    |
|-------|----------|----------|------------|-----------------|-------|------|------|---|---------|----|
| chr19 | 893002   | 893270   | MED16      | ENSG00000175221 | 64    | 0.2  | 0.12 | 1 | 0.075   | NA |
| chr19 | 924788   | 925001   | ARID3A     | ENSG00000116017 | -1143 | 0.31 | 0.31 | 1 | 0.0092  | NA |
| chr19 | 1307428  | 1307684  | AC005330.1 | ENSG00000240846 | 164   | 0.97 | 0.98 | 1 | -0.008  | NA |
| chr19 | 1526462  | 1526681  | PLK5P      | ENSG00000185988 | 1613  | 0.67 | 1    | 1 | -0.33   | NA |
| chr19 | 1621666  | 1621901  | TCF3       | ENSG00000071564 | 442   | 1    | 1    | 1 | 0       | NA |
| chr19 | 1955331  | 1955572  | C19orf34   | ENSG00000180846 | -903  | 0.5  | 1    | 1 | -0.5    | NA |
| chr19 | 1978370  | 1979984  | CSNK1G2    | ENSG00000133275 | 186   | 0.95 | 0.96 | 1 | -0.0015 | NA |
| chr19 | 2213860  | 2214142  | DOT1L      | ENSG00000104885 | 96    | 1    | 1    | 1 | 0       | NA |
| chr19 | 2455863  | 2457078  | LMNB2      | ENSG00000176619 | 524   | 0.19 | 0.19 | 1 | -0.0017 | NA |
| chr19 | 3047224  | 3047444  | TLE2       | ENSG00000065717 | -1548 | 0.22 | 0.14 | 1 | 0.076   | NA |
| chr19 | 3094671  | 3095055  | GNA11      | ENSG00000088256 | 455   | 0.23 | 0.21 | 1 | 0.017   | NA |
| chr19 | 3366743  | 3367457  | NFIC       | ENSG00000141905 | 465   | 0.27 | 0.28 | 1 | -0.014  | NA |
| chr19 | 3721464  | 3721788  | TJP3       | ENSG00000105289 | -109  | 0.22 | 0.23 | 1 | -0.012  | NA |
| chr19 | 3880718  | 3881278  | ATCAY      | ENSG00000167654 | 315   | 0.27 | 0.29 | 1 | -0.012  | NA |
| chr19 | 3960981  | 3961241  | MIR637     | ENSG00000207733 | 399   | 0.92 | 0.93 | 1 | -0.01   | NA |
| chr19 | 3970536  | 3970746  | DAPK3      | ENSG00000167657 | 397   | 0.25 | 0.29 | 1 | -0.036  | NA |
| chr19 | 5719624  | 5720796  | LONP1      | ENSG00000196365 | -53   | 0.19 | 0.19 | 1 | -0.0008 | NA |
| chr19 | 5785399  | 5785819  | PRR22      | ENSG00000212123 | -833  | 0.96 | 1    | 1 | -0.036  | NA |
| chr19 | 5789198  | 5789735  | DUS3L      | ENSG00000141994 | 1783  | 0.92 | 0.91 | 1 | 0.0057  | NA |
| chr19 | 5824103  | 5824334  | NRTN       | ENSG00000171119 | 400   | 0.65 | 0.65 | 1 | -0.0035 | NA |
| chr19 | 5915007  | 5915301  | CAPS       | ENSG00000105519 | 961   | 0.83 | 0.87 | 1 | -0.033  | NA |
| chr19 | 6424430  | 6425169  | KHSRP      | ENSG00000088247 | -5    | 0.19 | 0.19 | 1 | -0.0025 | NA |
| chr19 | 6740669  | 6741203  | TRIP10     | ENSG00000125733 | 242   | 0.28 | 0.27 | 1 | 0.011   | NA |
| chr19 | 6746023  | 6746292  | TRIP10     | ENSG00000125733 | 1517  | 0.98 | 0.98 | 1 | 0.0016  | NA |
| chr19 | 7912629  | 7912895  | EVI5L      | ENSG00000142459 | 1376  | 1    | 1    | 1 | 0       | NA |
| chr19 | 8555436  | 8555650  | PRAM1      | ENSG00000133246 | 1364  | 0.9  | 0.91 | 1 | -0.0054 | NA |
| chr19 | 9204246  | 9204490  | OR1M1      | ENSG00000170929 | 447   | 0.6  | 0.58 | 1 | 0.017   | NA |
| chr19 | 9694921  | 9695433  | ZNF121     | ENSG00000197961 | 25    | 0.2  | 0.2  | 1 | 0.0082  | NA |
| chr19 | 10220612 | 10221147 | PPAN       | ENSG00000130810 | 241   | 0.96 | 0.96 | 1 | -0.005  | NA |
| chr19 | 10668267 | 10668582 | KRI1       | ENSG00000129347 | 473   | 0.97 | 0.96 | 1 | 0.0039  | NA |

|       |          |          |               |                 |       |      |      |   |         |    |
|-------|----------|----------|---------------|-----------------|-------|------|------|---|---------|----|
| chr19 | 10812017 | 10812455 | QTRT1         | ENSG00000213339 | 124   | 0.34 | 0.33 | 1 | 0.01    | NA |
| chr19 | 11143975 | 11144249 | SMARCA4       | ENSG00000127616 | 0     | 0.95 | 0.95 | 1 | 0.0033  | NA |
| chr19 | 11303697 | 11304609 | KANK2         | ENSG00000197256 | 1113  | 0.92 | 0.92 | 1 | -0.0031 | NA |
| chr19 | 11529722 | 11529966 | RGL3          | ENSG00000205517 | 146   | 0.2  | 0.14 | 1 | 0.057   | NA |
| chr19 | 11531278 | 11531590 | RGL3          | ENSG00000205517 | -1416 | 0.37 | 0.33 | 1 | 0.043   | NA |
| chr19 | 11925086 | 11925546 | ZNF440        | ENSG00000171295 | 217   | 0.27 | 0.28 | 1 | -0.0074 | NA |
| chr19 | 12305552 | 12306304 | CTD-2666L21.1 | ENSG00000234773 | 98    | 0.18 | 0.18 | 1 | -0.0034 | NA |
| chr19 | 12807005 | 12807561 | FBXW9         | ENSG00000132004 | 149   | 0.22 | 0.23 | 1 | -0.0047 | NA |
| chr19 | 12833104 | 12833574 | TNPO2         | ENSG00000105576 | -234  | 0.29 | 0.29 | 1 | -0.0042 | NA |
| chr19 | 12868396 | 12868840 | BEST2         | ENSG00000039987 | 1945  | 0.29 | 0.27 | 1 | 0.017   | NA |
| chr19 | 14142398 | 14142977 | IL27RA        | ENSG00000104998 | 425   | 0.15 | 0.15 | 1 | -0.0015 | NA |
| chr19 | 14606709 | 14607385 | GIPC1         | ENSG00000123159 | -130  | 0.17 | 0.17 | 1 | 0.001   | NA |
| chr19 | 14639879 | 14641040 | DNAJB1        | ENSG00000132002 | -410  | 0.27 | 0.25 | 1 | 0.018   | NA |
| chr19 | 15529290 | 15529902 | AKAP8L        | ENSG00000011243 | 237   | 0.2  | 0.2  | 1 | -0.0061 | NA |
| chr19 | 16606740 | 16607444 | CALR3         | ENSG00000141979 | -89   | 0.18 | 0.18 | 1 | 0.0052  | NA |
| chr19 | 17212479 | 17213332 | MYO9B         | ENSG00000099331 | 439   | 0.99 | 0.98 | 1 | 0.01    | NA |
| chr19 | 17355181 | 17356471 | NR2F6         | ENSG00000160113 | 203   | 0.22 | 0.22 | 1 | -0.0022 | NA |
| chr19 | 17392383 | 17393775 | ANKLE1        | ENSG00000160117 | 625   | 0.21 | 0.21 | 1 | -0.0008 | NA |
| chr19 | 17443965 | 17444633 | ANO8          | ENSG00000074855 | 1339  | 1    | 1    | 1 | 0       | NA |
| chr19 | 17448182 | 17448470 | GTPBP3        | ENSG00000130299 | -30   | 0.29 | 0.29 | 1 | -0.0081 | NA |
| chr19 | 17580197 | 17580598 | SLC27A1       | ENSG00000130304 | 819   | 0.22 | 0.22 | 1 | -0.0048 | NA |
| chr19 | 18120613 | 18120840 | ARRDC2        | ENSG00000105643 | 1749  | 0.99 | 0.98 | 1 | 0.0043  | NA |
| chr19 | 18279514 | 18280178 | PIK3R2        | ENSG00000105647 | 538   | 0.95 | 0.95 | 1 | -0.0036 | NA |
| chr19 | 18699422 | 18700554 | C19orf60      | ENSG00000006015 | 493   | 0.23 | 0.23 | 1 | -0.0023 | NA |
| chr19 | 18716229 | 18718743 | CRLF1         | ENSG00000006016 | 174   | 0.19 | 0.19 | 1 | 0.0013  | NA |
| chr19 | 18722358 | 18724001 | TMEM59L       | ENSG00000105696 | -503  | 0.18 | 0.18 | 1 | -0.0043 | NA |
| chr19 | 19051019 | 19051939 | HOMER3        | ENSG00000051128 | -366  | 0.19 | 0.19 | 1 | 0.0017  | NA |
| chr19 | 19280998 | 19281560 | MEF2B         | ENSG00000213999 | -225  | 0.2  | 0.23 | 1 | -0.031  | NA |
| chr19 | 33210453 | 33211039 | TDRD12        | ENSG00000173809 | 67    | 0.97 | 0.97 | 1 | -0.0023 | NA |
| chr19 | 35454467 | 35455247 | ZNF792        | ENSG00000180884 | 96    | 0.21 | 0.22 | 1 | -0.0099 | NA |

|       |          |          |            |                 |       |      |      |   |         |    |
|-------|----------|----------|------------|-----------------|-------|------|------|---|---------|----|
| chr19 | 36347044 | 36348101 | KIRREL2    | ENSG00000126259 | -238  | 0.28 | 0.28 | 1 | -0.0013 | NA |
| chr19 | 36980190 | 36980733 | ZNF566     | ENSG00000186017 | -124  | 0.21 | 0.22 | 1 | -0.006  | NA |
| chr19 | 37808538 | 37809033 | HKR1       | ENSG00000181666 | -28   | 0.22 | 0.25 | 1 | -0.033  | NA |
| chr19 | 38806485 | 38806747 | YIF1B      | ENSG00000167645 | -10   | 0.21 | 0.2  | 1 | 0.0035  | NA |
| chr19 | 39574700 | 39575137 | AC011443.1 | ENSG00000183760 | -27   | 0.19 | 0.18 | 1 | 0.012   | NA |
| chr19 | 39833383 | 39833673 | SAMD4B     | ENSG00000179134 | 420   | 0.24 | 0.26 | 1 | -0.026  | NA |
| chr19 | 40005648 | 40005869 | AC011500.1 | ENSG00000186838 | 5     | 0.2  | 0.2  | 1 | 0.0026  | NA |
| chr19 | 40030611 | 40030985 | EID2       | ENSG00000176396 | 40    | 0.17 | 0.16 | 1 | 0.0042  | NA |
| chr19 | 40895468 | 40895793 | HIPK4      | ENSG00000160396 | 454   | 0.92 | 1    | 1 | -0.077  | NA |
| chr19 | 41222598 | 41223162 | ADCK4      | ENSG00000123815 | -90   | 0.19 | 0.19 | 1 | -0.0002 | NA |
| chr19 | 41595895 | 41596140 | CYP2A13    | ENSG00000197838 | 1649  | 0.2  | 0.2  | 1 | #####   | NA |
| chr19 | 41770013 | 41771113 | HNRNPUL1   | ENSG00000105323 | 443   | 0.19 | 0.19 | 1 | -0.0024 | NA |
| chr19 | 41945690 | 41945904 | ATP5SL     | ENSG00000105341 | 46    | 0.17 | 0.14 | 1 | 0.029   | NA |
| chr19 | 42388144 | 42388723 | ARHGEF1    | ENSG00000076928 | -13   | 0.22 | 0.23 | 1 | -0.0022 | NA |
| chr19 | 43912167 | 43912635 | AC018758.1 | ENSG00000244667 | 458   | 0.94 | 0.94 | 1 | 0.0037  | NA |
| chr19 | 43918854 | 43919127 | TEX101     | ENSG00000131126 | -45   | 0.95 | 0.94 | 1 | 0.0043  | NA |
| chr19 | 44645494 | 44646069 | ZNF226     | ENSG00000167380 | 71    | 0.3  | 0.25 | 1 | 0.049   | NA |
| chr19 | 45754630 | 45755261 | MARK4      | ENSG00000007047 | 103   | 0.31 | 0.3  | 1 | 0.0091  | NA |
| chr19 | 45826801 | 45827164 | CKM        | ENSG00000104879 | -749  | 0.48 | 0.45 | 1 | 0.027   | NA |
| chr19 | 45997873 | 45998256 | RTN2       | ENSG00000125744 | -1590 | 0.97 | 0.97 | 1 | 0.0055  | NA |
| chr19 | 46580385 | 46580971 | AC007785.1 | ENSG00000203347 | 209   | 0.33 | 0.25 | 1 | 0.083   | NA |
| chr19 | 47137780 | 47138070 | GNG8       | ENSG00000167414 | 14    | 0.2  | 0.2  | 1 | -0.0047 | NA |
| chr19 | 47163886 | 47164783 | DACT3      | ENSG00000197380 | 61    | 0.19 | 0.19 | 1 | 0.00082 | NA |
| chr19 | 47852300 | 47852978 | DHX34      | ENSG00000134815 | 101   | 0.28 | 0.28 | 1 | -0.0026 | NA |
| chr19 | 48248729 | 48249110 | GLTSCR2    | ENSG00000105373 | 126   | 0.22 | 0.33 | 1 | -0.11   | NA |
| chr19 | 49255778 | 49256495 | FUT1       | ENSG00000174951 | -1598 | 0.24 | 0.24 | 1 | -0.0005 | NA |
| chr19 | 49631105 | 49631494 | PPFIA3     | ENSG00000177380 | -285  | 0.22 | 0.2  | 1 | 0.017   | NA |
| chr19 | 49828412 | 49828668 | SLC6A16    | ENSG00000063127 | -98   | 0.91 | 0.9  | 1 | 0.0043  | NA |
| chr19 | 49866752 | 49867209 | DKKL1      | ENSG00000104901 | -62   | 0.13 | 0.12 | 1 | 0.012   | NA |
| chr19 | 49891269 | 49891604 | CCDC155    | ENSG00000161609 | -39   | 0.69 | 0.67 | 1 | 0.021   | NA |

|       |          |          |              |                 |       |      |      |    |         |    |
|-------|----------|----------|--------------|-----------------|-------|------|------|----|---------|----|
| chr19 | 50180010 | 50180907 | PRMT1        | ENSG00000126457 | 128   | 0.21 | 0.21 | 1  | 0.0019  | NA |
| chr19 | 50554012 | 50554492 | CTD-2126E3.1 | ENSG00000204666 | 406   | 0.25 | 0.16 | 1  | 0.09    | NA |
| chr19 | 50887181 | 50887933 | POLD1        | ENSG00000062822 | -36   | 0.25 | 0.24 | 1  | 0.01    | NA |
| chr19 | 51220054 | 51220298 | SHANK1       | ENSG00000161681 | 19    | 0.74 | 0.8  | 1  | -0.061  | NA |
| chr19 | 52097252 | 52098000 | AC018755.11  | ENSG00000167765 | 7     | 0.23 | 0.23 | 1  | 0.006   | NA |
| chr19 | 52551831 | 52552214 | ZNF432       | ENSG00000256087 | 84    | 0.25 | 0.13 | 1  | 0.12    | NA |
| chr19 | 52772706 | 52773257 | ZNF766       | ENSG00000196214 | 157   | 0.27 | 0.26 | 1  | 0.006   | NA |
| chr19 | 53039077 | 53039920 | ZNF808       | ENSG00000198482 | 260   | 0.19 | 0.18 | 1  | 0.0054  | NA |
| chr19 | 53141175 | 53141813 | ZNF83        | ENSG00000167766 | 144   | 0.42 | 0.33 | 1  | 0.089   | NA |
| chr19 | 53606059 | 53606784 | ZNF160       | ENSG00000170949 | 235   | 0.18 | 0.18 | 1  | #####   | NA |
| chr19 | 53935554 | 53935823 | ZNF761       | ENSG00000160336 | 442   | 0.24 | 0.23 | 1  | 0.012   | NA |
| chr19 | 54271740 | 54271959 | HMG1P32      | ENSG00000237589 | -42   | 0.94 | 0.96 | 1  | -0.012  | NA |
| chr19 | 54377172 | 54377441 | AC008440.5   | ENSG00000232220 | 1997  | 0.93 | 0.93 | 1  | -0.0063 | NA |
| chr19 | 54494608 | 54494816 | CACNG6       | ENSG00000130433 | -830  | 0.24 | 0.24 | 1  | -0.0005 | NA |
| chr19 | 55790848 | 55791105 | HSPBP1       | ENSG00000133265 | 503   | 0.21 | 0.22 | 1  | -0.013  | NA |
| chr19 | 55814067 | 55814278 | BRSK1        | ENSG00000160469 | 570   | 1    | 0.88 | 1  | 0.12    | NA |
| chr19 | 55864130 | 55864379 | COX6B2       | ENSG00000160471 | 1928  | 1    | 0.78 | 1  | 0.22    | NA |
| chr19 | 55873636 | 55873993 | FAM71E2      | ENSG00000180043 | 806   | 0.91 | 0.92 | 1  | -0.013  | NA |
| chr19 | 55889005 | 55889476 | TMEM190      | ENSG00000160472 | 1036  | 0.3  | 0.3  | 1  | -0.0007 | NA |
| chr19 | 57874763 | 57875110 | TRAPPC2P1    | ENSG00000256060 | 57    | 0.22 | 0.22 | 1  | 0.0027  | NA |
| chr19 | 58011124 | 58011743 | ZNF773       | ENSG00000152439 | 124   | 0.22 | 0.22 | 1  | -0.0006 | NA |
| chr19 | 58220189 | 58220517 | AC003006.1   | ENSG00000249233 | 183   | 0.17 | 0.18 | 1  | -0.0054 | NA |
| chr19 | 58280926 | 58281486 | ZNF586       | ENSG00000083828 | 209   | 0.2  | 0.18 | 1  | 0.015   | NA |
| chr19 | 58545115 | 58545897 | ZSCAN1       | ENSG00000152467 | 106   | 0.25 | 0.17 | 1  | 0.083   | NA |
| chr19 | 58666023 | 58666833 | ZNF329       | ENSG00000181894 | 49    | 0.19 | 0.18 | 1  | 0.0047  | NA |
| chr19 | 59070085 | 59071100 | UBE2M        | ENSG00000130725 | -249  | 0.3  | 0.32 | 1  | -0.024  | NA |
| chr19 | 345260   | 345590   | MIER2        | ENSG00000105556 | -634  | 0.1  | NA   | NA | NA      | NA |
| chr19 | 497799   | 498135   | MADCAM1      | ENSG00000099866 | 1467  | 0.19 | NA   | NA | NA      | NA |
| chr19 | 1240154  | 1240546  | ATP5D        | ENSG00000099624 | -1399 | 0.36 | NA   | NA | NA      | NA |
| chr19 | 1525206  | 1525854  | PLK5P        | ENSG00000185988 | 572   | 0.36 | NA   | NA | NA      | NA |

|       |          |          |            |                 |       |      |      |    |    |    |
|-------|----------|----------|------------|-----------------|-------|------|------|----|----|----|
| chr19 | 1861711  | 1861914  | KLF16      | ENSG00000129911 | 1684  | 1    | NA   | NA | NA | NA |
| chr19 | 1920892  | 1921200  | SCAMP4     | ENSG00000227500 | -1086 | 0.75 | NA   | NA | NA | NA |
| chr19 | 4101771  | 4101973  | MAP2K2     | ENSG00000126934 | 630   | 1    | NA   | NA | NA | NA |
| chr19 | 6372722  | 6373218  | ALKBH7     | ENSG00000125652 | 526   | 0.16 | NA   | NA | NA | NA |
| chr19 | 10464666 | 10464927 | TYK2       | ENSG00000105397 | -42   | 1    | NA   | NA | NA | NA |
| chr19 | 11266230 | 11266726 | SPC24      | ENSG00000161888 | 5     | 0.5  | NA   | NA | NA | NA |
| chr19 | 12750871 | 12751156 | ZNF490     | ENSG00000188033 | -101  | 0.11 | NA   | NA | NA | NA |
| chr19 | 18117908 | 18118305 | ARRDC2     | ENSG00000105643 | -871  | 0.33 | NA   | NA | NA | NA |
| chr19 | 19303350 | 19303622 | MEF2BNB    | ENSG00000254901 | -89   | 0.5  | NA   | NA | NA | NA |
| chr19 | 21646328 | 21646536 | AC010615.2 | ENSG00000249756 | 254   | 0.5  | NA   | NA | NA | NA |
| chr19 | 30302295 | 30302510 | CCNE1      | ENSG00000105173 | -499  | NA   | 0.11 | NA | NA | NA |
| chr19 | 37341731 | 37342000 | ZNF345     | ENSG00000251247 | 85    | 0.5  | NA   | NA | NA | NA |
| chr19 | 37708883 | 37709181 | ZNF585B    | ENSG00000245680 | 23    | 0.31 | NA   | NA | NA | NA |
| chr19 | 40730385 | 40730712 | CNTD2      | ENSG00000105219 | 296   | 0.97 | NA   | NA | NA | NA |
| chr19 | 41304467 | 41305050 | EGLN2      | ENSG00000171570 | -290  | 0.58 | NA   | NA | NA | NA |
| chr19 | 41531804 | 41532051 | CYP2A7P1   | ENSG00000213908 | 1688  | 0.5  | NA   | NA | NA | NA |
| chr19 | 44808897 | 44809229 | ZNF235     | ENSG00000159917 | 115   | 0.4  | NA   | NA | NA | NA |
| chr19 | 44860657 | 44860928 | ZNF285     | ENSG00000062370 | 64    | 0.33 | NA   | NA | NA | NA |
| chr19 | 49223833 | 49224276 | MAMSTR     | ENSG00000176909 | -1076 | 0.33 | NA   | NA | NA | NA |
| chr19 | 49842018 | 49842323 | AC011450.1 | ENSG00000197813 | 1389  | 0.25 | NA   | NA | NA | NA |
| chr19 | 50096609 | 50096912 | PRR12      | ENSG00000126464 | 1848  | 0.18 | NA   | NA | NA | NA |
| chr19 | 50316211 | 50316469 | FUZ        | ENSG00000010361 | 73    | 0.6  | NA   | NA | NA | NA |
| chr19 | 51411634 | 51412004 | KLK4       | ENSG00000167749 | 765   | 0.5  | NA   | NA | NA | NA |
| chr19 | 52901306 | 52901527 | ZNF528     | ENSG00000167555 | 263   | NA   | 0.37 | NA | NA | NA |
| chr19 | 53360201 | 53360460 | ZNF468     | ENSG00000204604 | 572   | 0.13 | NA   | NA | NA | NA |
| chr19 | 53496732 | 53497028 | ZNF702P    | ENSG00000242779 | -103  | 0.21 | NA   | NA | NA | NA |
| chr19 | 53794411 | 53794732 | BIRC8      | ENSG00000163098 | 304   | 0.8  | NA   | NA | NA | NA |
| chr19 | 55494229 | 55494535 | NLRP2      | ENSG00000022556 | -472  | 0.78 | NA   | NA | NA | NA |
| chr19 | 55591433 | 55591644 | EPS8L1     | ENSG00000131037 | -222  | 0.22 | NA   | NA | NA | NA |
| chr19 | 56047403 | 56047668 | SBK2       | ENSG00000187550 | 126   | 0.67 | NA   | NA | NA | NA |

|       |           |           |             |                 |       |      |      |          |       |    |
|-------|-----------|-----------|-------------|-----------------|-------|------|------|----------|-------|----|
| chr19 | 57349997  | 57350470  | ZIM2        | ENSG00000198300 | 1861  | 0.46 | NA   | NA       | NA    | NA |
| chr2  | 101924364 | 101925357 | RNF149      | ENSG00000163162 | 298   | 0.32 | 0.11 | 1.10E-09 | 0.21  | NA |
| chr2  | 177052957 | 177054350 | AC009336.23 | ENSG00000224189 | -656  | 0.34 | 0.19 | 1.50E-09 | 0.16  | NA |
| chr2  | 220299483 | 220300243 | SPEG        | ENSG00000072195 | 295   | 0.43 | 0.23 | 1.80E-09 | 0.2   | NA |
| chr2  | 85645343  | 85645879  | CAPG        | ENSG00000042493 | -56   | 0.61 | 0.22 | 1.90E-09 | 0.38  | NA |
| chr2  | 37571676  | 37572397  | QPCT        | ENSG00000115828 | 319   | 0.44 | 0.23 | 2.90E-09 | 0.21  | NA |
| chr2  | 242755693 | 242756363 | NEU4        | ENSG00000204099 | 814   | 0.73 | 0.93 | 5.90E-09 | -0.2  | NA |
| chr2  | 232348216 | 232348866 | NCL         | ENSG00000115053 | -189  | 0.87 | 0.67 | 7.90E-09 | 0.21  | NA |
| chr2  | 27664939  | 27665151  | KRTCAP3     | ENSG00000157992 | -188  | 0.93 | 0.56 | 2.00E-08 | 0.38  | NA |
| chr2  | 45235511  | 45237792  | SIX2        | ENSG00000170577 | -108  | 0.38 | 0.24 | 2.00E-08 | 0.14  | NA |
| chr2  | 241459632 | 241460047 | ANKMY1      | ENSG00000144504 | 105   | 0.6  | 0.25 | 2.20E-08 | 0.35  | NA |
| chr2  | 203776859 | 203777522 | ALS2CR8     | ENSG00000138380 | 253   | 0.71 | 0.1  | 2.50E-08 | 0.61  | NA |
| chr2  | 97426800  | 97427208  | CNNM4       | ENSG00000158158 | 365   | 0.32 | 0.13 | 3.50E-08 | 0.19  | NA |
| chr2  | 233215680 | 233217556 | ECEL1P3     | ENSG00000230122 | -599  | 0.35 | 0.21 | 7.60E-08 | 0.14  | NA |
| chr2  | 130763483 | 130763764 | AC018865.7  | ENSG00000231147 | -150  | 0.41 | 0.12 | 1.00E-07 | 0.29  | NA |
| chr2  | 239147592 | 239149900 | HES6        | ENSG00000144485 | -434  | 0.28 | 0.17 | 1.10E-07 | 0.11  | NA |
| chr2  | 183730808 | 183731357 | FRZB        | ENSG00000162998 | 808   | 0.66 | 0.35 | 1.40E-07 | 0.3   | NA |
| chr2  | 170681219 | 170681587 | METTL5      | ENSG00000138382 | -79   | 0.7  | 0.16 | 1.60E-07 | 0.54  | NA |
| chr2  | 218898490 | 218898835 | RUFY4       | ENSG00000188282 | -1021 | 0.82 | 0.39 | 1.90E-07 | 0.42  | NA |
| chr2  | 241496576 | 241497600 | ANKMY1      | ENSG00000144504 | -265  | 0.4  | 0.21 | 2.10E-07 | 0.19  | NA |
| chr2  | 170624684 | 170625480 | AC009967.6  | ENSG00000231550 | 227   | 0.92 | 0.71 | 3.30E-07 | 0.2   | NA |
| chr2  | 177016416 | 177016632 | HOXD4       | ENSG00000170166 | -500  | 0.59 | 0.2  | 3.70E-07 | 0.39  | NA |
| chr2  | 29337983  | 29338909  | CLIP4       | ENSG00000115295 | 154   | 0.25 | 0.11 | 3.90E-07 | 0.14  | NA |
| chr2  | 1746833   | 1748971   | PXDN        | ENSG00000130508 | 312   | 0.32 | 0.19 | 4.30E-07 | 0.12  | NA |
| chr2  | 220361462 | 220363254 | SPEG        | ENSG00000072195 | -55   | 0.24 | 0.36 | 4.30E-07 | -0.11 | NA |
| chr2  | 208631558 | 208634934 | FZD5        | ENSG00000163251 | 1041  | 0.4  | 0.25 | 5.80E-07 | 0.14  | NA |
| chr2  | 54785026  | 54785969  | SPTBN1      | ENSG00000115306 | -34   | 0.43 | 0.2  | 6.00E-07 | 0.23  | NA |
| chr2  | 241758141 | 241760783 | KIF1A       | ENSG00000130294 | -1067 | 0.28 | 0.18 | 6.80E-07 | 0.1   | NA |
| chr2  | 233791783 | 233793922 | NGEF        | ENSG00000066248 | 12    | 0.43 | 0.29 | 7.00E-07 | 0.14  | NA |
| chr2  | 193058995 | 193060812 | TMEFF2      | ENSG00000144339 | -653  | 0.34 | 0.19 | 9.80E-07 | 0.15  | NA |



|      |           |           |            |                 |       |      |      |          |       |    |
|------|-----------|-----------|------------|-----------------|-------|------|------|----------|-------|----|
| chr2 | 196933310 | 196933665 | DNAH7      | ENSG00000118997 | 49    | 0.38 | 0.12 | 9.90E-07 | 0.26  | NA |
| chr2 | 208988834 | 208989269 | CRYGD      | ENSG00000118231 | 174   | 0.78 | 0.23 | 9.90E-07 | 0.55  | NA |
| chr2 | 91634538  | 91636111  | AC018696.1 | ENSG00000226615 | -607  | 0.17 | 0.09 | 1.00E-06 | 0.072 | NA |
| chr2 | 220312698 | 220314094 | SPEG       | ENSG00000072195 | -1996 | 0.9  | 0.8  | 1.10E-06 | 0.11  | NA |
| chr2 | 201390685 | 201391217 | SGOL2      | ENSG00000163535 | 71    | 0.17 | 0.55 | 1.50E-06 | -0.37 | NA |
| chr2 | 37458398  | 37459199  | CEBPZ      | ENSG00000115816 | -286  | 0.19 | 0.37 | 1.80E-06 | -0.18 | NA |
| chr2 | 175193398 | 175193764 | AC018470.4 | ENSG00000231453 | 81    | 0.9  | 0.42 | 2.00E-06 | 0.48  | NA |
| chr2 | 232650898 | 232651431 | PDE6D      | ENSG00000156973 | -182  | 0.35 | 0.16 | 4.10E-06 | 0.19  | NA |
| chr2 | 68694047  | 68695097  | FBXO48     | ENSG00000204923 | -182  | 0.46 | 0.22 | 4.30E-06 | 0.24  | NA |
| chr2 | 233251361 | 233253414 | AC068134.1 | ENSG00000244280 | -633  | 0.3  | 0.2  | 4.40E-06 | 0.11  | NA |
| chr2 | 58468113  | 58468632  | FANCL      | ENSG00000115392 | 65    | 0.18 | 1    | 4.80E-06 | -0.82 | NA |
| chr2 | 198380423 | 198381301 | MOBKL3     | ENSG00000115540 | 306   | 0.33 | 0.15 | 5.10E-06 | 0.18  | NA |
| chr2 | 191184323 | 191184767 | HIBCH      | ENSG00000198130 | 71    | 0.41 | 0.84 | 5.50E-06 | -0.43 | NA |
| chr2 | 219723702 | 219725010 | WNT6       | ENSG00000115596 | -188  | 0.31 | 0.15 | 5.90E-06 | 0.16  | NA |
| chr2 | 105275588 | 105275940 | AC013402.5 | ENSG00000230690 | -31   | 0.63 | 0.23 | 6.10E-06 | 0.41  | NA |
| chr2 | 7005163   | 7006340   | CMPK2      | ENSG00000134326 | 76    | 0.25 | 0.14 | 7.10E-06 | 0.11  | NA |
| chr2 | 100937779 | 100939059 | LONRF2     | ENSG00000170500 | 776   | 0.24 | 0.13 | 9.80E-06 | 0.11  | NA |
| chr2 | 56150340  | 56151180  | EFEMP1     | ENSG00000115380 | -404  | 0.54 | 0.29 | 1.00E-05 | 0.25  | NA |
| chr2 | 127413696 | 127414171 | GYPC       | ENSG00000136732 | 224   | 0.37 | 0.19 | 1.00E-05 | 0.18  | NA |
| chr2 | 129075197 | 129077639 | HS6ST1     | ENSG00000136720 | -448  | 0.41 | 0.27 | 1.50E-05 | 0.15  | NA |
| chr2 | 242844583 | 242844944 | AC131097.4 | ENSG00000216921 | -61   | 0.17 | 0.44 | 1.80E-05 | -0.27 | NA |
| chr2 | 238395061 | 238396241 | MLPH       | ENSG00000115648 | -160  | 0.38 | 0.21 | 2.50E-05 | 0.17  | NA |
| chr2 | 176973427 | 176973718 | HOXD10     | ENSG00000128710 | 54    | 0.41 | 0.13 | 3.20E-05 | 0.28  | NA |
| chr2 | 111489977 | 111490884 | ACOXL      | ENSG00000153093 | 280   | 0.29 | 0.15 | 3.60E-05 | 0.13  | NA |
| chr2 | 71115927  | 71116412  | AC007040.5 | ENSG00000237751 | 1168  | 0.44 | 0.25 | 3.70E-05 | 0.19  | NA |
| chr2 | 55844267  | 55845065  | SMEK2      | ENSG00000138041 | 57    | 0.16 | 0.73 | 4.50E-05 | -0.56 | NA |
| chr2 | 96011132  | 96013197  | KCNIP3     | ENSG00000115041 | -312  | 0.26 | 0.17 | 4.50E-05 | 0.092 | NA |
| chr2 | 236401799 | 236403946 | AGAP1      | ENSG00000157985 | 139   | 0.29 | 0.18 | 4.60E-05 | 0.11  | NA |
| chr2 | 133110316 | 133111319 | FAM201B    | ENSG00000230992 | 522   | 0.21 | 0.09 | 4.80E-05 | 0.12  | NA |
| chr2 | 36582397  | 36584260  | CRIM1      | ENSG00000150938 | 259   | 0.31 | 0.19 | 5.00E-05 | 0.11  | NA |

|      |           |           |            |                 |       |      |      |          |       |    |
|------|-----------|-----------|------------|-----------------|-------|------|------|----------|-------|----|
| chr2 | 73429283  | 73430647  | NOTO       | ENSG00000214513 | 535   | 0.31 | 0.2  | 5.30E-05 | 0.11  | NA |
| chr2 | 172952809 | 172953160 | DLX1       | ENSG00000144355 | 889   | 0.53 | 0.23 | 6.20E-05 | 0.3   | NA |
| chr2 | 132110849 | 132111169 | AC073869.2 | ENSG00000224425 | -197  | 1    | 0.12 | 6.50E-05 | 0.88  | NA |
| chr2 | 101434979 | 101437453 | NPAS2      | ENSG00000170485 | -398  | 0.27 | 0.18 | 6.70E-05 | 0.093 | NA |
| chr2 | 74667593  | 74669403  | RTKN       | ENSG00000114993 | -788  | 0.39 | 0.25 | 7.20E-05 | 0.14  | NA |
| chr2 | 69869986  | 69871716  | AAK1       | ENSG00000115977 | -65   | 0.27 | 0.16 | 8.00E-05 | 0.11  | NA |
| chr2 | 45877178  | 45879685  | PRKCE      | ENSG00000171132 | -53   | 0.28 | 0.2  | 8.40E-05 | 0.088 | NA |
| chr2 | 160760604 | 160761452 | LY75       | ENSG00000054219 | 132   | 0.4  | 0.24 | 8.90E-05 | 0.16  | NA |
| chr2 | 170590189 | 170590899 | KLHL23     | ENSG00000213160 | 188   | 0.22 | 0.44 | 9.30E-05 | -0.22 | NA |
| chr2 | 110370906 | 110373301 | 10-Sep     | ENSG00000186522 | -1022 | 0.27 | 0.2  | 1.00E-04 | 0.077 | NA |
| chr2 | 74691959  | 74692657  | MOGS       | ENSG00000115275 | 181   | 0.23 | 0.12 | 0.00011  | 0.11  | NA |
| chr2 | 136499145 | 136500144 | UBXN4      | ENSG00000144224 | 455   | 0.36 | 0.17 | 0.00011  | 0.19  | NA |
| chr2 | 11924983  | 11925253  | LPIN1      | ENSG00000134324 | 1123  | 0.26 | 0.12 | 0.00012  | 0.14  | NA |
| chr2 | 208976900 | 208977396 | AC093698.3 | ENSG00000229150 | 84    | 0.93 | 0.66 | 0.00012  | 0.27  | NA |
| chr2 | 239048071 | 239048454 | KLHL30     | ENSG00000168427 | 899   | 0.97 | 0.83 | 0.00013  | 0.14  | NA |
| chr2 | 166649909 | 166650966 | GALNT3     | ENSG00000115339 | -48   | 0.35 | 0.21 | 0.00014  | 0.15  | NA |
| chr2 | 18765745  | 18766180  | NT5C1B     | ENSG00000185013 | -785  | 0.96 | 0.85 | 0.00016  | 0.11  | NA |
| chr2 | 102758806 | 102759577 | IL1R1      | ENSG00000115594 | -55   | 0.38 | 0.17 | 0.00016  | 0.21  | NA |
| chr2 | 231902026 | 231903122 | C2orf72    | ENSG00000204128 | 369   | 0.24 | 0.12 | 0.00017  | 0.12  | NA |
| chr2 | 71017028  | 71017976  | FIGLA      | ENSG00000183733 | 273   | 0.33 | 0.2  | 0.00019  | 0.13  | NA |
| chr2 | 10587827  | 10589155  | ODC1       | ENSG00000115758 | -585  | 0.3  | 0.19 | 0.00021  | 0.12  | NA |
| chr2 | 238768073 | 238768831 | RAMP1      | ENSG00000132329 | 265   | 0.29 | 0.15 | 0.00022  | 0.14  | NA |
| chr2 | 72376055  | 72377175  | CYP26B1    | ENSG00000003137 | -1448 | 0.35 | 0.19 | 0.00023  | 0.16  | NA |
| chr2 | 219156977 | 219157380 | TMBIM1     | ENSG00000135926 | 48    | 0.61 | 0.32 | 0.00023  | 0.29  | NA |
| chr2 | 177029413 | 177029941 | HOXD3      | ENSG00000128652 | 872   | 0.6  | 0.34 | 3.00E-04 | 0.26  | NA |
| chr2 | 198174658 | 198175535 | ANKRD44    | ENSG00000065413 | 408   | 0.29 | 0.15 | 3.00E-04 | 0.14  | NA |
| chr2 | 105488368 | 105489991 | AC018730.3 | ENSG00000229743 | -269  | 0.26 | 0.16 | 0.00031  | 0.093 | NA |
| chr2 | 219848919 | 219850541 | FEV        | ENSG00000163497 | -533  | 0.26 | 0.36 | 0.00033  | -0.1  | NA |
| chr2 | 177027617 | 177028014 | HOXD3      | ENSG00000128652 | -990  | 0.6  | 0.3  | 0.00038  | 0.3   | NA |
| chr2 | 233350278 | 233352974 | ECEL1      | ENSG00000171551 | -263  | 0.25 | 0.18 | 0.00039  | 0.068 | NA |

|      |           |           |            |                 |       |      |      |          |        |    |
|------|-----------|-----------|------------|-----------------|-------|------|------|----------|--------|----|
| chr2 | 27484873  | 27488189  | SLC30A3    | ENSG00000115194 | -1503 | 0.22 | 0.16 | 0.00041  | 0.061  | NA |
| chr2 | 10829724  | 10830241  | NOL10      | ENSG00000115761 | 111   | 0.34 | 0.16 | 0.00046  | 0.18   | NA |
| chr2 | 172864613 | 172865064 | SLC25A12   | ENSG00000115840 | -139  | 0.24 | 0.54 | 0.00047  | -0.3   | NA |
| chr2 | 114736853 | 114737689 | AC010982.1 | ENSG00000234199 | 125   | 0.76 | 0.58 | 0.00048  | 0.18   | NA |
| chr2 | 54013801  | 54014498  | ASB3       | ENSG00000115239 | -163  | 0.24 | 0.12 | 0.00054  | 0.12   | NA |
| chr2 | 24232680  | 24233260  | MFSD2B     | ENSG00000205639 | 19    | 0.17 | 0.35 | 0.00055  | -0.18  | NA |
| chr2 | 202645387 | 202646155 | ALS2       | ENSG00000003393 | -137  | 0.39 | 0.19 | 0.00055  | 0.19   | NA |
| chr2 | 105468851 | 105473488 | AC018730.1 | ENSG00000233639 | -1528 | 0.3  | 0.2  | 0.00056  | 0.095  | NA |
| chr2 | 216300267 | 216300997 | FN1        | ENSG00000115414 | 158   | 0.34 | 0.16 | 0.00056  | 0.18   | NA |
| chr2 | 131594139 | 131595302 | ARHGEF4    | ENSG00000136002 | 231   | 0.22 | 0.14 | 0.00057  | 0.084  | NA |
| chr2 | 239196923 | 239197900 | PER2       | ENSG00000132326 | -204  | 0.28 | 0.16 | 6.00E-04 | 0.12   | NA |
| chr2 | 27529083  | 27531465  | UCN        | ENSG00000163794 | 1039  | 0.21 | 0.29 | 0.00063  | -0.082 | NA |
| chr2 | 124782252 | 124783255 | AC079154.1 | ENSG00000228400 | -3    | 0.33 | 0.15 | 0.00063  | 0.18   | NA |
| chr2 | 37423578  | 37424361  | AC007390.5 | ENSG00000218739 | 338   | 0.31 | 0.18 | 0.00068  | 0.13   | NA |
| chr2 | 232826077 | 232826836 | DIS3L2     | ENSG00000144535 | 163   | 0.23 | 0.13 | 0.00069  | 0.098  | NA |
| chr2 | 171672310 | 171675447 | GAD1       | ENSG00000128683 | 1254  | 0.27 | 0.2  | 7.00E-04 | 0.072  | NA |
| chr2 | 99346882  | 99348177  | MGAT4A     | ENSG00000071073 | 27    | 0.26 | 0.16 | 0.00072  | 0.098  | NA |
| chr2 | 19555789  | 19558403  | OSR1       | ENSG00000143867 | -423  | 0.48 | 0.37 | 0.00077  | 0.12   | NA |
| chr2 | 27308546  | 27309770  | KHK        | ENSG00000138030 | -457  | 0.23 | 0.15 | 0.00077  | 0.078  | NA |
| chr2 | 172778733 | 172779299 | HAT1       | ENSG00000128708 | 58    | 0.31 | 0.16 | 0.00077  | 0.16   | NA |
| chr2 | 131129718 | 131130511 | PTPN18     | ENSG00000072135 | -67   | 0.29 | 0.17 | 0.00078  | 0.12   | NA |
| chr2 | 111875206 | 111880965 | BCL2L11    | ENSG00000153094 | 1130  | 0.29 | 0.24 | 8.00E-04 | 0.057  | NA |
| chr2 | 87015974  | 87018182  | CD8A       | ENSG00000153563 | 870   | 0.29 | 0.21 | 0.00081  | 0.079  | NA |
| chr2 | 229045957 | 229046553 | SPHKAP     | ENSG00000153820 | 87    | 0.17 | 0.42 | 0.00082  | -0.25  | NA |
| chr2 | 73052637  | 73053227  | EXOC6B     | ENSG00000144036 | 202   | 0.26 | 0.13 | 0.00084  | 0.14   | NA |
| chr2 | 172378822 | 172380189 | CYBRD1     | ENSG00000071967 | 647   | 0.25 | 0.14 | 0.00084  | 0.11   | NA |
| chr2 | 191208306 | 191209000 | INPP1      | ENSG00000151689 | 280   | 0.25 | 0.15 | 0.00088  | 0.11   | NA |
| chr2 | 60983193  | 60983870  | PAPOLG     | ENSG00000115421 | 166   | 0.29 | 0.16 | 0.00089  | 0.13   | NA |
| chr2 | 175546862 | 175547880 | WIPF1      | ENSG00000115935 | 204   | 0.22 | 0.15 | 0.00091  | 0.077  | NA |
| chr2 | 85197445  | 85199321  | KCMF1      | ENSG00000176407 | 167   | 0.27 | 0.18 | 0.0011   | 0.091  | NA |

|      |           |           |            |                 |      |      |      |        |        |    |
|------|-----------|-----------|------------|-----------------|------|------|------|--------|--------|----|
| chr2 | 234776882 | 234777098 | MSL3P1     | ENSG00000224287 | 100  | 0.36 | 0.13 | 0.0011 | 0.23   | NA |
| chr2 | 131673686 | 131674150 | ARHGEF4    | ENSG00000136002 | -306 | 0.91 | 0.79 | 0.0012 | 0.11   | NA |
| chr2 | 209271337 | 209271987 | PTH2R      | ENSG00000144407 | 106  | 0.28 | 0.17 | 0.0012 | 0.1    | NA |
| chr2 | 11605743  | 11606385  | E2F6       | ENSG00000169016 | -59  | 0.34 | 0.19 | 0.0013 | 0.15   | NA |
| chr2 | 46523789  | 46527140  | EPAS1      | ENSG00000116016 | 923  | 0.24 | 0.18 | 0.0014 | 0.063  | NA |
| chr2 | 86422068  | 86422858  | IMMT       | ENSG00000132305 | -338 | 0.24 | 0.13 | 0.0014 | 0.11   | NA |
| chr2 | 235860117 | 235861716 | SH3BP4     | ENSG00000130147 | 299  | 0.27 | 0.17 | 0.0014 | 0.097  | NA |
| chr2 | 172290364 | 172291201 | METTL8     | ENSG00000123600 | -282 | 0.22 | 0.13 | 0.0015 | 0.094  | NA |
| chr2 | 50574045  | 50574817  | NRXN1      | ENSG00000179915 | -40  | 0.22 | 0.13 | 0.0016 | 0.092  | NA |
| chr2 | 97303912  | 97304387  | KIAA1310   | ENSG00000114982 | -103 | 0.2  | 0.1  | 0.0016 | 0.1    | NA |
| chr2 | 241535684 | 241535953 | CAPN10     | ENSG00000142330 | 1167 | 0.47 | 0.22 | 0.0016 | 0.25   | NA |
| chr2 | 24149256  | 24150354  | ATAD2B     | ENSG00000119778 | 126  | 0.27 | 0.19 | 0.0017 | 0.085  | NA |
| chr2 | 73495920  | 73496910  | FBXO41     | ENSG00000163013 | 1628 | 0.27 | 0.17 | 0.0017 | 0.1    | NA |
| chr2 | 102867093 | 102867827 | AC007248.6 | ENSG00000205716 | -745 | 0.14 | 0.33 | 0.0017 | -0.19  | NA |
| chr2 | 200775746 | 200776548 | AC073043.1 | ENSG00000232732 | -342 | 0.16 | 0.33 | 0.0017 | -0.17  | NA |
| chr2 | 10182635  | 10184702  | KLF11      | ENSG00000172059 | 692  | 0.28 | 0.18 | 0.0018 | 0.1    | NA |
| chr2 | 208546082 | 208546562 | AC096772.4 | ENSG00000213082 | 8    | 0.49 | 0.25 | 0.0018 | 0.24   | NA |
| chr2 | 219263098 | 219265556 | CTDSP1     | ENSG00000144579 | 901  | 0.27 | 0.19 | 0.0018 | 0.081  | NA |
| chr2 | 241525622 | 241526835 | CAPN10     | ENSG00000142330 | 95   | 0.22 | 0.35 | 0.0018 | -0.13  | NA |
| chr2 | 31456740  | 31457653  | EHD3       | ENSG00000013016 | 316  | 0.22 | 0.13 | 0.0019 | 0.093  | NA |
| chr2 | 219824151 | 219825864 | CDK5R2     | ENSG00000171450 | 630  | 0.24 | 0.16 | 0.0019 | 0.083  | NA |
| chr2 | 182756428 | 182757519 | SSFA2      | ENSG00000138434 | 413  | 0.14 | 0.24 | 0.002  | -0.098 | NA |
| chr2 | 48541252  | 48542587  | FOXN2      | ENSG00000170802 | 143  | 0.14 | 0.21 | 0.0021 | -0.073 | NA |
| chr2 | 192542573 | 192543329 | OBFC2A     | ENSG00000173559 | 157  | 0.27 | 0.16 | 0.0021 | 0.11   | NA |
| chr2 | 25475706  | 25475928  | DNMT3A     | ENSG00000119772 | -637 | 0.19 | 1    | 0.0022 | -0.81  | NA |
| chr2 | 31806545  | 31806782  | SRD5A2     | ENSG00000049319 | -527 | 0.52 | 0.74 | 0.0022 | -0.22  | NA |
| chr2 | 37311072  | 37311893  | HEATR5B    | ENSG00000008869 | 3    | 0.21 | 0.11 | 0.0023 | 0.099  | NA |
| chr2 | 131113090 | 131114277 | PTPN18     | ENSG00000072135 | 103  | 0.26 | 0.19 | 0.0023 | 0.078  | NA |
| chr2 | 205409939 | 205410910 | PARD3B     | ENSG00000116117 | -92  | 0.3  | 0.19 | 0.0024 | 0.11   | NA |
| chr2 | 187350497 | 187351609 | ZC3H15     | ENSG00000065548 | 170  | 0.32 | 0.18 | 0.0025 | 0.14   | NA |

|      |           |           |            |                 |       |      |      |        |        |    |
|------|-----------|-----------|------------|-----------------|-------|------|------|--------|--------|----|
| chr2 | 219081653 | 219082032 | ARPC2      | ENSG00000163466 | 25    | 0.19 | 0.52 | 0.0025 | -0.33  | NA |
| chr2 | 137522460 | 137523696 | THSD7B     | ENSG00000144229 | -37   | 0.32 | 0.21 | 0.0026 | 0.11   | NA |
| chr2 | 191745286 | 191746599 | GLS        | ENSG00000115419 | 389   | 0.15 | 0.24 | 0.0029 | -0.088 | NA |
| chr2 | 54682899  | 54684374  | SPTBN1     | ENSG00000115306 | 214   | 0.23 | 0.17 | 0.003  | 0.06   | NA |
| chr2 | 97527489  | 97527704  | SEMA4C     | ENSG00000168758 | 588   | 0.72 | 0.55 | 0.0032 | 0.18   | NA |
| chr2 | 178417295 | 178417961 | TTC30B     | ENSG00000196659 | -128  | 0.3  | 0.15 | 0.0033 | 0.15   | NA |
| chr2 | 172947843 | 172948200 | DLX1       | ENSG00000144355 | -1447 | 0.17 | 0.34 | 0.0035 | -0.17  | NA |
| chr2 | 26256301  | 26257567  | RAB10      | ENSG00000084733 | -42   | 0.16 | 0.27 | 0.0037 | -0.11  | NA |
| chr2 | 106014878 | 106015884 | FHL2       | ENSG00000115641 | 126   | 0.27 | 0.2  | 0.0037 | 0.078  | NA |
| chr2 | 176969217 | 176969895 | HOXD11     | ENSG00000128713 | 612   | 0.16 | 0.29 | 0.0037 | -0.13  | NA |
| chr2 | 241395248 | 241395802 | MIR149     | ENSG00000207611 | 107   | 0.53 | 0.34 | 0.004  | 0.19   | NA |
| chr2 | 177502240 | 177502910 | AC017048.3 | ENSG00000163364 | -285  | 0.23 | 0.12 | 0.0043 | 0.11   | NA |
| chr2 | 96781406  | 96782971  | ADRA2B     | ENSG00000222040 | -204  | 0.27 | 0.39 | 0.0045 | -0.11  | NA |
| chr2 | 11051858  | 11053476  | KCNF1      | ENSG00000162975 | 604   | 0.43 | 0.32 | 0.0047 | 0.11   | NA |
| chr2 | 242295397 | 242296201 | FARP2      | ENSG00000006607 | 141   | 0.25 | 0.15 | 0.005  | 0.1    | NA |
| chr2 | 239140096 | 239140659 | AC016757.3 | ENSG00000186235 | -211  | 0.37 | 0.16 | 0.0051 | 0.2    | NA |
| chr2 | 27356980  | 27357656  | PREB       | ENSG00000138073 | 162   | 0.21 | 0.36 | 0.0052 | -0.15  | NA |
| chr2 | 88469691  | 88470386  | THNSL2     | ENSG00000144115 | 203   | 0.3  | 0.18 | 0.0055 | 0.12   | NA |
| chr2 | 3391402   | 3392500   | TTC15      | ENSG00000171853 | 53    | 0.97 | 0.93 | 0.0056 | 0.042  | NA |
| chr2 | 233925091 | 233925318 | INPP5D     | ENSG00000168918 | 15    | 0.79 | 0.6  | 0.0059 | 0.18   | NA |
| chr2 | 27651265  | 27652129  | NRBP1      | ENSG00000115216 | 239   | 0.21 | 0.13 | 0.006  | 0.076  | NA |
| chr2 | 128421719 | 128422182 | LIMS2      | ENSG00000072163 | 43    | 0.43 | 0.23 | 0.0061 | 0.2    | NA |
| chr2 | 100105543 | 100107158 | REV1       | ENSG00000135945 | 85    | 0.25 | 0.16 | 0.0063 | 0.09   | NA |
| chr2 | 224701962 | 224702790 | AP1S3      | ENSG00000152056 | -175  | 0.24 | 0.4  | 0.0067 | -0.16  | NA |
| chr2 | 153573743 | 153575553 | PRPF40A    | ENSG00000196504 | -761  | 0.2  | 0.14 | 0.0069 | 0.06   | NA |
| chr2 | 107082328 | 107084936 | RGPD3      | ENSG00000153165 | -1083 | 0.94 | 0.98 | 0.0072 | -0.04  | NA |
| chr2 | 237994004 | 237994876 | AC105760.2 | ENSG00000227252 | 20    | 0.27 | 0.46 | 0.0073 | -0.19  | NA |
| chr2 | 25142472  | 25143689  | ADCY3      | ENSG00000138031 | -372  | 0.18 | 0.25 | 0.0076 | -0.072 | NA |
| chr2 | 152145869 | 152146319 | NMI        | ENSG00000123609 | 283   | 0.22 | 0.34 | 0.0077 | -0.13  | NA |
| chr2 | 239755096 | 239758310 | TWIST2     | ENSG00000233608 | 30    | 0.34 | 0.28 | 0.0079 | 0.055  | NA |

|      |           |           |            |                 |      |      |      |        |        |    |
|------|-----------|-----------|------------|-----------------|------|------|------|--------|--------|----|
| chr2 | 112812827 | 112813614 | TMEM87B    | ENSG00000153214 | -77  | 0.32 | 0.19 | 0.008  | 0.13   | NA |
| chr2 | 219536410 | 219536813 | RNF25      | ENSG00000163481 | 79   | 0.37 | 0.72 | 0.008  | -0.35  | NA |
| chr2 | 172016538 | 172017028 | TLK1       | ENSG00000198586 | 222  | 0.3  | 0.13 | 0.0082 | 0.17   | NA |
| chr2 | 242498013 | 242499274 | BOK        | ENSG00000176720 | 507  | 0.18 | 0.25 | 0.0088 | -0.071 | NA |
| chr2 | 9346383   | 9347944   | ASAP2      | ENSG00000151693 | 269  | 0.15 | 0.21 | 0.0097 | -0.063 | NA |
| chr2 | 17721537  | 17722021  | VSNL1      | ENSG00000163032 | -141 | 0.25 | 0.13 | 0.01   | 0.12   | NA |
| chr2 | 70994447  | 70995385  | ADD2       | ENSG00000075340 | -315 | 0.22 | 0.14 | 0.01   | 0.078  | NA |
| chr2 | 24163185  | 24163878  | UBXN2A     | ENSG00000173960 | 242  | 0.3  | 0.18 | 0.011  | 0.12   | NA |
| chr2 | 37551350  | 37552546  | PRKD3      | ENSG00000115825 | -435 | 0.29 | 0.2  | 0.011  | 0.088  | NA |
| chr2 | 38603569  | 38604510  | ATL2       | ENSG00000119787 | -303 | 0.23 | 0.15 | 0.011  | 0.08   | NA |
| chr2 | 71114733  | 71115474  | AC007040.5 | ENSG00000237751 | 102  | 0.33 | 0.21 | 0.011  | 0.12   | NA |
| chr2 | 85132338  | 85133083  | TMSB10     | ENSG00000034510 | -39  | 0.32 | 0.17 | 0.011  | 0.14   | NA |
| chr2 | 232260100 | 232261134 | B3GNT7     | ENSG00000156966 | 363  | 0.44 | 0.32 | 0.011  | 0.11   | NA |
| chr2 | 232378948 | 232379666 | C2orf52    | ENSG00000181798 | -257 | 0.13 | 0.57 | 0.011  | -0.44  | NA |
| chr2 | 10952402  | 10953384  | PDIA6      | ENSG00000143870 | -13  | 0.28 | 0.2  | 0.012  | 0.08   | NA |
| chr2 | 27631884  | 27632822  | PPM1G      | ENSG00000115241 | -64  | 0.21 | 0.13 | 0.012  | 0.08   | NA |
| chr2 | 27805754  | 27806078  | ZNF512     | ENSG00000243943 | 19   | 0.13 | 0.23 | 0.012  | -0.1   | NA |
| chr2 | 43019665  | 43020509  | HAAO       | ENSG00000162882 | -416 | 0.43 | 0.32 | 0.012  | 0.11   | NA |
| chr2 | 74781494  | 74782685  | DOK1       | ENSG00000115325 | 231  | 0.36 | 0.25 | 0.012  | 0.11   | NA |
| chr2 | 97523356  | 97524186  | ANKRD23    | ENSG00000163126 | -100 | 0.28 | 0.17 | 0.012  | 0.11   | NA |
| chr2 | 9770189   | 9771562   | YWHAQ      | ENSG00000134308 | -478 | 0.17 | 0.25 | 0.013  | -0.081 | NA |
| chr2 | 47142466  | 47143261  | MCFD2      | ENSG00000180398 | 56   | 0.19 | 0.29 | 0.013  | -0.096 | NA |
| chr2 | 55646621  | 55647329  | CCDC88A    | ENSG00000115355 | -226 | 0.28 | 0.16 | 0.014  | 0.13   | NA |
| chr2 | 62422191  | 62424458  | B3GNT2     | ENSG00000170340 | 76   | 0.43 | 0.37 | 0.014  | 0.062  | NA |
| chr2 | 132795199 | 132796196 | AC093787.1 | ENSG00000226886 | -131 | 0.7  | 0.51 | 0.014  | 0.18   | NA |
| chr2 | 178483233 | 178483783 | TTC30A     | ENSG00000197557 | -61  | 0.2  | 0.1  | 0.014  | 0.11   | NA |
| chr2 | 200715388 | 200716067 | AC073043.2 | ENSG00000226124 | -131 | 0.26 | 0.47 | 0.014  | -0.21  | NA |
| chr2 | 27886259  | 27887410  | SLC4A1AP   | ENSG00000163798 | 496  | 0.31 | 0.23 | 0.015  | 0.086  | NA |
| chr2 | 68870351  | 68871055  | PROKR1     | ENSG00000169618 | -18  | 0.28 | 0.2  | 0.015  | 0.084  | NA |
| chr2 | 203735925 | 203736883 | ICA1L      | ENSG00000163596 | -435 | 0.22 | 0.31 | 0.015  | -0.088 | NA |

|      |           |           |            |                 |       |      |      |       |        |    |
|------|-----------|-----------|------------|-----------------|-------|------|------|-------|--------|----|
| chr2 | 228189836 | 228190501 | MFF        | ENSG00000168958 | 301   | 0.28 | 0.18 | 0.015 | 0.1    | NA |
| chr2 | 43327936  | 43328337  | AC093609.1 | ENSG00000230587 | 1693  | 0.21 | 0.33 | 0.016 | -0.12  | NA |
| chr2 | 99552185  | 99553831  | C2orf55    | ENSG00000196872 | -371  | 0.26 | 0.21 | 0.016 | 0.054  | NA |
| chr2 | 113299403 | 113300284 | POLR1B     | ENSG00000125630 | 351   | 0.3  | 0.2  | 0.016 | 0.1    | NA |
| chr2 | 119602616 | 119604486 | EN1        | ENSG00000163064 | -1623 | 0.33 | 0.26 | 0.016 | 0.069  | NA |
| chr2 | 220143879 | 220144633 | DNAJB2     | ENSG00000135924 | 267   | 0.26 | 0.15 | 0.016 | 0.11   | NA |
| chr2 | 223183013 | 223185468 | AC010980.2 | ENSG00000237732 | -1153 | 0.25 | 0.19 | 0.016 | 0.061  | NA |
| chr2 | 223288922 | 223290013 | SGPP2      | ENSG00000163082 | 231   | 0.39 | 0.3  | 0.016 | 0.091  | NA |
| chr2 | 231577309 | 231578504 | CAB39      | ENSG00000135932 | 346   | 0.3  | 0.2  | 0.016 | 0.11   | NA |
| chr2 | 54950394  | 54952488  | EML6       | ENSG00000214595 | 805   | 0.25 | 0.2  | 0.017 | 0.057  | NA |
| chr2 | 142887724 | 142888553 | LRP1B      | ENSG00000168702 | 436   | 0.33 | 0.18 | 0.017 | 0.15   | NA |
| chr2 | 175190866 | 175192123 | AC018470.4 | ENSG00000231453 | 739   | 0.37 | 0.18 | 0.017 | 0.19   | NA |
| chr2 | 180128618 | 180129663 | SESTD1     | ENSG00000187231 | -210  | 0.2  | 0.14 | 0.017 | 0.058  | NA |
| chr2 | 242843760 | 242844198 | AC131097.4 | ENSG00000216921 | 723   | 0.81 | 0.93 | 0.017 | -0.12  | NA |
| chr2 | 29117366  | 29118025  | WDR43      | ENSG00000163811 | 186   | 0.15 | 0.23 | 0.018 | -0.074 | NA |
| chr2 | 65283030  | 65284169  | CEP68      | ENSG00000011523 | 99    | 0.14 | 0.22 | 0.018 | -0.079 | NA |
| chr2 | 72371121  | 72375004  | CYP26B1    | ENSG00000003137 | -1518 | 0.24 | 0.19 | 0.018 | 0.052  | NA |
| chr2 | 242575706 | 242577492 | ATG4B      | ENSG00000168397 | -29   | 0.17 | 0.22 | 0.019 | -0.053 | NA |
| chr2 | 222436034 | 222438941 | EPHA4      | ENSG00000116106 | -484  | 0.26 | 0.2  | 0.02  | 0.055  | NA |
| chr2 | 162101439 | 162101650 | AC009299.3 | ENSG00000227403 | 278   | 0.96 | 0.87 | 0.021 | 0.084  | NA |
| chr2 | 11483959  | 11485553  | ROCK2      | ENSG00000134318 | -489  | 0.17 | 0.22 | 0.022 | -0.051 | NA |
| chr2 | 176032385 | 176033275 | MIR933     | ENSG00000215973 | -393  | 0.42 | 0.21 | 0.022 | 0.21   | NA |
| chr2 | 96930859  | 96932291  | TMEM127    | ENSG00000135956 | 157   | 0.24 | 0.18 | 0.023 | 0.057  | NA |
| chr2 | 176993479 | 176995557 | HOXD8      | ENSG00000175879 | 96    | 0.25 | 0.18 | 0.023 | 0.067  | NA |
| chr2 | 60776596  | 60778157  | BCL11A     | ENSG00000119866 | 673   | 0.22 | 0.15 | 0.024 | 0.072  | NA |
| chr2 | 152117883 | 152118479 | RBM43      | ENSG00000184898 | 111   | 0.38 | 0.18 | 0.024 | 0.21   | NA |
| chr2 | 190526058 | 190526419 | ASNSD1     | ENSG00000138381 | 92    | 0.27 | 0.5  | 0.024 | -0.23  | NA |
| chr2 | 232645313 | 232646505 | PDE6D      | ENSG00000156973 | 64    | 0.21 | 0.13 | 0.024 | 0.076  | NA |
| chr2 | 236578080 | 236580153 | AGAP1      | ENSG00000157985 | 868   | 0.24 | 0.19 | 0.024 | 0.053  | NA |
| chr2 | 243030300 | 243031562 | AC093642.5 | ENSG00000220804 | 147   | 0.26 | 0.18 | 0.025 | 0.076  | NA |

|      |           |           |            |                 |       |      |      |       |        |    |
|------|-----------|-----------|------------|-----------------|-------|------|------|-------|--------|----|
| chr2 | 62080892  | 62081363  | FAM161A    | ENSG00000170264 | 36    | 0.17 | 0.32 | 0.026 | -0.15  | NA |
| chr2 | 71453588  | 71454318  | PAIP2B     | ENSG00000124374 | 260   | 0.18 | 0.43 | 0.026 | -0.24  | NA |
| chr2 | 97202313  | 97203787  | ARID5A     | ENSG00000196843 | 570   | 0.23 | 0.16 | 0.026 | 0.071  | NA |
| chr2 | 101033606 | 101034296 | CHST10     | ENSG00000115526 | -302  | 0.26 | 0.14 | 0.026 | 0.12   | NA |
| chr2 | 114341301 | 114342298 | WASH2P     | ENSG00000146556 | 135   | 0.26 | 0.14 | 0.026 | 0.12   | NA |
| chr2 | 127976389 | 127977667 | CYP27C1    | ENSG00000186684 | 626   | 0.24 | 0.18 | 0.026 | 0.068  | NA |
| chr2 | 242088415 | 242090330 | PASK       | ENSG00000115687 | -522  | 0.23 | 0.18 | 0.026 | 0.055  | NA |
| chr2 | 102003277 | 102004187 | CREG2      | ENSG00000175874 | -130  | 0.29 | 0.2  | 0.027 | 0.085  | NA |
| chr2 | 109065509 | 109065954 | GCC2       | ENSG00000135968 | 84    | 0.22 | 0.14 | 0.027 | 0.083  | NA |
| chr2 | 109150330 | 109151301 | AC012487.2 | ENSG00000214184 | -177  | 0.31 | 0.23 | 0.027 | 0.084  | NA |
| chr2 | 176949511 | 176949795 | EVX2       | ENSG00000174279 | -1012 | 0.29 | 1    | 0.027 | -0.71  | NA |
| chr2 | 71126720  | 71129209  | VAX2       | ENSG00000116035 | 244   | 0.22 | 0.17 | 0.028 | 0.051  | NA |
| chr2 | 74645467  | 74645750  | HMGA1P8    | ENSG00000233155 | -39   | 0.83 | 0.96 | 0.028 | -0.12  | NA |
| chr2 | 170683860 | 170684629 | UBR3       | ENSG00000144357 | 276   | 0.24 | 0.15 | 0.028 | 0.088  | NA |
| chr2 | 110872945 | 110873587 | MALL       | ENSG00000144063 | 132   | 0.16 | 0.23 | 0.029 | -0.072 | NA |
| chr2 | 80531367  | 80531719  | LRRTM1     | ENSG00000162951 | -144  | 0.27 | 0.15 | 0.03  | 0.12   | NA |
| chr2 | 120124241 | 120125287 | C2orf76    | ENSG00000186132 | -506  | 0.22 | 0.29 | 0.03  | -0.072 | NA |
| chr2 | 187454399 | 187455349 | ITGAV      | ENSG00000138448 | 84    | 0.3  | 0.18 | 0.03  | 0.12   | NA |
| chr2 | 64751141  | 64752083  | AFTPH      | ENSG00000119844 | 147   | 0.15 | 0.22 | 0.031 | -0.067 | NA |
| chr2 | 192109828 | 192110940 | MYO1B      | ENSG00000128641 | 473   | 0.28 | 0.18 | 0.031 | 0.096  | NA |
| chr2 | 207139336 | 207140031 | ZDBF2      | ENSG00000204186 | 296   | 0.27 | 0.16 | 0.031 | 0.11   | NA |
| chr2 | 119914126 | 119916663 | C1QL2      | ENSG00000144119 | 1071  | 0.26 | 0.21 | 0.032 | 0.051  | NA |
| chr2 | 136874086 | 136875780 | CXCR4      | ENSG00000121966 | 374   | 0.32 | 0.45 | 0.032 | -0.13  | NA |
| chr2 | 149895022 | 149895808 | LYPD6B     | ENSG00000150556 | 183   | 0.28 | 0.17 | 0.032 | 0.1    | NA |
| chr2 | 65657768  | 65659986  | SPRED2     | ENSG00000198369 | 434   | 0.23 | 0.18 | 0.033 | 0.054  | NA |
| chr2 | 175351364 | 175352154 | GPR155     | ENSG00000163328 | -31   | 0.27 | 0.16 | 0.034 | 0.11   | NA |
| chr2 | 219827659 | 219828205 | AC097468.7 | ENSG00000235024 | -1307 | 0.44 | 0.27 | 0.034 | 0.17   | NA |
| chr2 | 39347251  | 39348361  | SOS1       | ENSG00000115904 | -215  | 0.17 | 0.22 | 0.035 | -0.053 | NA |
| chr2 | 183580693 | 183581202 | DNAJC10    | ENSG00000077232 | -52   | 0.26 | 0.12 | 0.035 | 0.14   | NA |
| chr2 | 27346380  | 27346766  | ABHD1      | ENSG00000143994 | -109  | 0.17 | 0.08 | 0.038 | 0.09   | NA |



|      |           |           |            |                 |       |      |      |       |        |    |
|------|-----------|-----------|------------|-----------------|-------|------|------|-------|--------|----|
| chr2 | 97173851  | 97174485  | NEURL3     | ENSG00000163121 | -322  | 0.22 | 0.34 | 0.038 | -0.12  | NA |
| chr2 | 241905704 | 241905911 | AC104809.3 | ENSG00000226321 | -1042 | 0.92 | 0.78 | 0.038 | 0.14   | NA |
| chr2 | 105946164 | 105946773 | TGFBRAP1   | ENSG00000135966 | 23    | 0.18 | 0.34 | 0.039 | -0.16  | NA |
| chr2 | 239067512 | 239068028 | FAM132B    | ENSG00000178752 | 147   | 0.24 | 0.18 | 0.039 | 0.063  | NA |
| chr2 | 61108125  | 61109016  | AC010733.4 | ENSG00000228414 | -121  | 0.21 | 0.15 | 0.04  | 0.057  | NA |
| chr2 | 134023947 | 134024467 | AC010890.1 | ENSG00000226953 | 440   | 0.2  | 0.1  | 0.04  | 0.097  | NA |
| chr2 | 61404048  | 61405361  | AHSA2      | ENSG00000173209 | 151   | 0.29 | 0.23 | 0.041 | 0.06   | NA |
| chr2 | 216176549 | 216177132 | ATIC       | ENSG00000138363 | 161   | 0.25 | 0.14 | 0.041 | 0.11   | NA |
| chr2 | 219924819 | 219926130 | IHH        | ENSG00000163501 | -285  | 0.24 | 0.18 | 0.041 | 0.058  | NA |
| chr2 | 179058611 | 179060144 | OSBPL6     | ENSG00000079156 | 169   | 0.17 | 0.21 | 0.045 | -0.048 | NA |
| chr2 | 182521221 | 182521927 | CERKL      | ENSG00000188452 | 159   | 0.18 | 0.25 | 0.045 | -0.068 | NA |
| chr2 | 74641733  | 74643350  | C2orf81    | ENSG00000159239 | 1169  | 0.43 | 0.37 | 0.046 | 0.067  | NA |
| chr2 | 165477562 | 165478342 | GRB14      | ENSG00000115290 | -50   | 0.27 | 0.17 | 0.046 | 0.099  | NA |
| chr2 | 153031933 | 153032895 | STAM2      | ENSG00000115145 | -171  | 0.24 | 0.19 | 0.047 | 0.058  | NA |
| chr2 | 38977535  | 38978684  | SRSF7      | ENSG00000115875 | 171   | 0.24 | 0.36 | 0.048 | -0.12  | NA |
| chr2 | 95872891  | 95873548  | AC092835.2 | ENSG00000233757 | -64   | 0.22 | 0.3  | 0.048 | -0.08  | NA |
| chr2 | 223520516 | 223520893 | FARSB      | ENSG00000116120 | 66    | 0.36 | 0.21 | 0.048 | 0.15   | NA |
| chr2 | 3605489   | 3606332   | RNASEH1    | ENSG00000171865 | -31   | 0.2  | 0.28 | 0.05  | -0.076 | NA |
| chr2 | 198569911 | 198570948 | MARS2      | ENSG00000247626 | 342   | 0.41 | 0.3  | 0.05  | 0.11   | NA |
| chr2 | 240964645 | 240965271 | NDUFA10    | ENSG00000130414 | -235  | 0.22 | 0.15 | 0.05  | 0.073  | NA |
| chr2 | 118943823 | 118944199 | AC093901.1 | ENSG00000226856 | -62   | 0.27 | 0.18 | 0.051 | 0.092  | NA |
| chr2 | 135475698 | 135476993 | TMEM163    | ENSG00000152128 | 225   | 0.21 | 0.16 | 0.051 | 0.049  | NA |
| chr2 | 5831187   | 5831413   | AC108025.2 | ENSG00000230090 | -50   | 0.21 | 0.13 | 0.052 | 0.079  | NA |
| chr2 | 112895792 | 112897841 | FBLN7      | ENSG00000144152 | 854   | 0.4  | 0.12 | 0.052 | 0.28   | NA |
| chr2 | 177001221 | 177001783 | HOXD3      | ENSG00000128652 | 162   | 0.24 | 0.16 | 0.052 | 0.077  | NA |
| chr2 | 75147005  | 75147336  | AC104135.3 | ENSG00000204792 | 1895  | 0.39 | 0.28 | 0.053 | 0.12   | NA |
| chr2 | 113914681 | 113915396 | PSD4       | ENSG00000125637 | 136   | 0.22 | 0.14 | 0.053 | 0.072  | NA |
| chr2 | 128848663 | 128849210 | UGGT1      | ENSG00000136731 | 162   | 0.27 | 0.17 | 0.053 | 0.11   | NA |
| chr2 | 230578062 | 230579981 | DNER       | ENSG00000187957 | 253   | 0.25 | 0.19 | 0.053 | 0.053  | NA |
| chr2 | 68479061  | 68480040  | PPP3R1     | ENSG00000221823 | 113   | 0.26 | 0.2  | 0.054 | 0.058  | NA |

|      |           |           |            |                 |      |      |      |       |        |    |
|------|-----------|-----------|------------|-----------------|------|------|------|-------|--------|----|
| chr2 | 89064493  | 89065513  | ANKRD36BP2 | ENSG00000230006 | -321 | 0.2  | 0.26 | 0.054 | -0.063 | NA |
| chr2 | 211035478 | 211036637 | C2orf67    | ENSG00000144445 | -6   | 0.26 | 0.16 | 0.054 | 0.099  | NA |
| chr2 | 74734322  | 74735273  | PCGF1      | ENSG00000115289 | -276 | 0.22 | 0.15 | 0.057 | 0.076  | NA |
| chr2 | 113403001 | 113404079 | AC079922.3 | ENSG00000237753 | -273 | 0.2  | 0.27 | 0.057 | -0.065 | NA |
| chr2 | 26785881  | 26786101  | C2orf70    | ENSG00000173557 | 88   | 0.25 | 0.45 | 0.058 | -0.2   | NA |
| chr2 | 200333687 | 200334172 | AC017096.1 | ENSG00000225953 | 320  | 0.22 | 0.33 | 0.058 | -0.11  | NA |
| chr2 | 31360321  | 31361821  | GALNT14    | ENSG00000158089 | -184 | 0.27 | 0.21 | 0.059 | 0.06   | NA |
| chr2 | 101869023 | 101869876 | C2orf29    | ENSG00000158435 | 185  | 0.27 | 0.19 | 0.059 | 0.08   | NA |
| chr2 | 27274165  | 27274953  | AGBL5      | ENSG00000084693 | 45   | 0.23 | 0.16 | 0.06  | 0.073  | NA |
| chr2 | 86564242  | 86565068  | REEP1      | ENSG00000068615 | -63  | 0.15 | 0.21 | 0.06  | -0.068 | NA |
| chr2 | 178257227 | 178257892 | AGPS       | ENSG00000018510 | 187  | 0.23 | 0.16 | 0.06  | 0.071  | NA |
| chr2 | 225906653 | 225907464 | DOCK10     | ENSG00000135905 | 43   | 0.23 | 0.17 | 0.061 | 0.055  | NA |
| chr2 | 65454553  | 65455444  | ACTR2      | ENSG00000138071 | 111  | 0.21 | 0.16 | 0.062 | 0.056  | NA |
| chr2 | 128145117 | 128145897 | MAP3K2     | ENSG00000169967 | 1    | 0.2  | 0.16 | 0.062 | 0.046  | NA |
| chr2 | 120980332 | 120981451 | TMEM185B   | ENSG00000226479 | -339 | 0.21 | 0.15 | 0.063 | 0.065  | NA |
| chr2 | 131850472 | 131851362 | FAM168B    | ENSG00000152102 | 75   | 0.2  | 0.14 | 0.063 | 0.062  | NA |
| chr2 | 162164675 | 162165248 | PSMD14     | ENSG00000115233 | -11  | 0.16 | 0.24 | 0.063 | -0.081 | NA |
| chr2 | 74153853  | 74154281  | DGUOK      | ENSG00000114956 | 114  | 0.4  | 0.21 | 0.064 | 0.19   | NA |
| chr2 | 86332659  | 86333650  | POLR1A     | ENSG00000068654 | -158 | 0.31 | 1    | 0.064 | -0.69  | NA |
| chr2 | 239228874 | 239229436 | TRAF3IP1   | ENSG00000204104 | 73   | 0.22 | 0.37 | 0.065 | -0.15  | NA |
| chr2 | 62115445  | 62115990  | CCT4       | ENSG00000115484 | -124 | 0.18 | 0.29 | 0.066 | -0.1   | NA |
| chr2 | 197504191 | 197504558 | CCDC150    | ENSG00000144395 | 96   | 0.26 | 0.15 | 0.066 | 0.11   | NA |
| chr2 | 24713710  | 24715168  | NCOA1      | ENSG00000084676 | -344 | 0.24 | 0.19 | 0.067 | 0.047  | NA |
| chr2 | 102313549 | 102314478 | MAP4K4     | ENSG00000071054 | -193 | 0.27 | 0.21 | 0.067 | 0.06   | NA |
| chr2 | 173292099 | 173293183 | ITGA6      | ENSG00000091409 | 495  | 0.21 | 0.27 | 0.067 | -0.058 | NA |
| chr2 | 190648566 | 190649484 | PMS1       | ENSG00000064933 | 214  | 0.3  | 0.22 | 0.067 | 0.08   | NA |
| chr2 | 37193131  | 37194287  | STRN       | ENSG00000115808 | -103 | 0.19 | 0.15 | 0.068 | 0.044  | NA |
| chr2 | 97651764  | 97652441  | FAM178B    | ENSG00000168754 | 199  | 0.96 | 0.99 | 0.069 | -0.031 | NA |
| chr2 | 132218392 | 132218725 | RHOQP2     | ENSG00000232742 | 25   | 0.11 | 0.2  | 0.069 | -0.085 | NA |
| chr2 | 25895902  | 25896856  | DTNB       | ENSG00000138101 | -96  | 0.21 | 0.15 | 0.07  | 0.056  | NA |

|      |           |           |            |                 |       |      |      |       |        |    |
|------|-----------|-----------|------------|-----------------|-------|------|------|-------|--------|----|
| chr2 | 98280063  | 98280871  | ACTR1B     | ENSG00000115073 | -88   | 0.24 | 0.19 | 0.07  | 0.054  | NA |
| chr2 | 202507139 | 202508270 | ALS2CR4    | ENSG00000155755 | -328  | 0.28 | 0.18 | 0.07  | 0.11   | NA |
| chr2 | 219432767 | 219434061 | USP37      | ENSG00000135913 | -400  | 0.19 | 0.15 | 0.07  | 0.044  | NA |
| chr2 | 85822404  | 85822983  | RNF181     | ENSG00000168894 | -155  | 0.19 | 0.29 | 0.071 | -0.1   | NA |
| chr2 | 198363689 | 198365405 | HSPD1      | ENSG00000144381 | -6    | 0.25 | 0.33 | 0.071 | -0.085 | NA |
| chr2 | 241401561 | 241401986 | GPC1       | ENSG00000063660 | -1041 | 0.89 | 0.95 | 0.071 | -0.066 | NA |
| chr2 | 95522598  | 95524188  | ANKRD20A8P | ENSG00000229089 | -475  | 0.32 | 0.27 | 0.072 | 0.056  | NA |
| chr2 | 240029674 | 240029964 | HDAC4      | ENSG00000068024 | -70   | 0.87 | 0.97 | 0.072 | -0.1   | NA |
| chr2 | 240321777 | 240323919 | HDAC4      | ENSG00000068024 | -205  | 0.22 | 0.18 | 0.072 | 0.037  | NA |
| chr2 | 234652246 | 234652720 | DNAJB3     | ENSG00000227802 | 79    | 0.86 | 1    | 0.074 | -0.14  | NA |
| chr2 | 31805293  | 31806403  | SRD5A2     | ENSG00000049319 | 121   | 0.27 | 0.36 | 0.075 | -0.087 | NA |
| chr2 | 75937657  | 75938139  | C2orf3     | ENSG00000005436 | -166  | 0.25 | 0.54 | 0.075 | -0.29  | NA |
| chr2 | 74881359  | 74882019  | SEMA4F     | ENSG00000135622 | 310   | 0.17 | 0.13 | 0.076 | 0.048  | NA |
| chr2 | 62732758  | 62733497  | TMEM17     | ENSG00000186889 | 349   | 0.23 | 0.33 | 0.077 | -0.1   | NA |
| chr2 | 208030852 | 208031477 | KLF7       | ENSG00000118263 | -254  | 0.26 | 0.16 | 0.077 | 0.096  | NA |
| chr2 | 214016357 | 214017105 | IKZF2      | ENSG00000030419 | -404  | 0.28 | 0.18 | 0.077 | 0.099  | NA |
| chr2 | 233245999 | 233246448 | AC068134.8 | ENSG00000224516 | 161   | 0.52 | 0.34 | 0.077 | 0.18   | NA |
| chr2 | 242004823 | 242005102 | AC005237.4 | ENSG00000225521 | -1429 | 0.61 | 0.86 | 0.077 | -0.24  | NA |
| chr2 | 287353    | 290099    | FAM150B    | ENSG00000189292 | -1039 | 0.24 | 0.2  | 0.079 | 0.041  | NA |
| chr2 | 20550013  | 20551063  | PUM2       | ENSG00000055917 | -476  | 0.17 | 0.22 | 0.081 | -0.059 | NA |
| chr2 | 10219802  | 10221016  | CYS1       | ENSG00000205795 | 129   | 0.18 | 0.22 | 0.082 | -0.042 | NA |
| chr2 | 216973805 | 216974264 | XRCC5      | ENSG00000079246 | 14    | 0.26 | 0.18 | 0.082 | 0.076  | NA |
| chr2 | 219923669 | 219923911 | IHH        | ENSG00000163501 | 1399  | 0.28 | 0.12 | 0.082 | 0.16   | NA |
| chr2 | 25474757  | 25475598  | DNMT3A     | ENSG00000119772 | -225  | 0.3  | 0.4  | 0.083 | -0.11  | NA |
| chr2 | 217236025 | 217237129 | 4-Mar      | ENSG00000144583 | 173   | 0.22 | 0.15 | 0.083 | 0.069  | NA |
| chr2 | 71192094  | 71192495  | AC007040.1 | ENSG00000241159 | -407  | 0.14 | 0.2  | 0.084 | -0.054 | NA |
| chr2 | 172949242 | 172950126 | DLX1       | ENSG00000144355 | 216   | 0.21 | 0.31 | 0.084 | -0.1   | NA |
| chr2 | 210867172 | 210867705 | RPE        | ENSG00000197713 | 149   | 0.23 | 0.13 | 0.084 | 0.1    | NA |
| chr2 | 64681011  | 64682237  | AC008074.1 | ENSG00000119862 | 521   | 0.32 | 0.25 | 0.085 | 0.075  | NA |
| chr2 | 45838292  | 45838582  | SRBD1      | ENSG00000068784 | -17   | 0.2  | 0.31 | 0.087 | -0.11  | NA |

|      |           |           |            |                 |      |      |      |       |        |    |
|------|-----------|-----------|------------|-----------------|------|------|------|-------|--------|----|
| chr2 | 241512464 | 241512671 | RNPEPL1    | ENSG00000142327 | -720 | 0.88 | 0.96 | 0.087 | -0.082 | NA |
| chr2 | 176957054 | 176958279 | HOXD13     | ENSG00000128714 | 47   | 0.22 | 0.17 | 0.088 | 0.055  | NA |
| chr2 | 239335160 | 239336263 | ASB1       | ENSG00000065802 | 328  | 0.25 | 0.19 | 0.088 | 0.061  | NA |
| chr2 | 3622654   | 3623704   | RPS7       | ENSG00000171863 | 384  | 0.2  | 0.27 | 0.089 | -0.074 | NA |
| chr2 | 98262362  | 98262924  | COX5B      | ENSG00000135940 | 140  | 0.22 | 0.3  | 0.089 | -0.078 | NA |
| chr2 | 130986131 | 130987183 | AC018804.7 | ENSG00000213225 | -292 | 0.64 | 0.69 | 0.09  | -0.05  | NA |
| chr2 | 218621279 | 218621498 | DIRC3      | ENSG00000231672 | -72  | 0.22 | 0.41 | 0.09  | -0.18  | NA |
| chr2 | 230785912 | 230787665 | TRIP12     | ENSG00000153827 | -714 | 0.23 | 0.19 | 0.092 | 0.037  | NA |
| chr2 | 10442308  | 10444509  | HPCAL1     | ENSG00000115756 | 393  | 0.24 | 0.2  | 0.094 | 0.039  | NA |
| chr2 | 103353138 | 103353414 | MFSD9      | ENSG00000135953 | 22   | 0.36 | 0.21 | 0.094 | 0.15   | NA |
| chr2 | 114299035 | 114300177 | AL078621.5 | ENSG00000225398 | 92   | 0.23 | 0.18 | 0.094 | 0.045  | NA |
| chr2 | 242754323 | 242754629 | NEU4       | ENSG00000204099 | -738 | 0.9  | 0.8  | 0.094 | 0.092  | NA |
| chr2 | 25015879  | 25016627  | PTRHD1     | ENSG00000184924 | -331 | 0.25 | 0.18 | 0.095 | 0.068  | NA |
| chr2 | 114513712 | 114514621 | SLC35F5    | ENSG00000115084 | -2   | 0.18 | 0.27 | 0.095 | -0.086 | NA |
| chr2 | 118593639 | 118594234 | AC009404.2 | ENSG00000236255 | 10   | 0.2  | 0.28 | 0.095 | -0.083 | NA |
| chr2 | 122042066 | 122043093 | TFCP2L1    | ENSG00000115112 | 204  | 0.25 | 0.33 | 0.096 | -0.084 | NA |
| chr2 | 238707008 | 238708021 | RBM44      | ENSG00000177483 | 482  | 0.77 | 0.83 | 0.096 | -0.058 | NA |
| chr2 | 122494108 | 122494494 | MKI67IP    | ENSG00000155438 | 147  | 0.25 | 0.14 | 0.098 | 0.11   | NA |
| chr2 | 46925898  | 46926969  | SOCS5      | ENSG00000171150 | 342  | 0.19 | 0.15 | 0.099 | 0.046  | NA |
| chr2 | 131186145 | 131186496 | AC140481.1 | ENSG00000178162 | -571 | 0.57 | 0.2  | 0.099 | 0.37   | NA |
| chr2 | 233562005 | 233562547 | GIGYF2     | ENSG00000204120 | 267  | 0.23 | 0.15 | 0.099 | 0.077  | NA |
| chr2 | 26396102  | 26397204  | FAM59B     | ENSG00000157833 | 693  | 0.22 | 0.28 | 0.1   | -0.052 | NA |
| chr2 | 66662042  | 66662338  | MEIS1      | ENSG00000143995 | -111 | 0.16 | 0.31 | 0.1   | -0.15  | NA |
| chr2 | 74618753  | 74619291  | DCTN1      | ENSG00000204843 | -115 | 0.33 | 0.21 | 0.1   | 0.12   | NA |
| chr2 | 97778469  | 97779540  | ANKRD36    | ENSG00000135976 | -229 | 0.55 | 0.23 | 0.1   | 0.31   | NA |
| chr2 | 99952488  | 99954400  | TXNDC9     | ENSG00000115514 | -671 | 0.25 | 0.2  | 0.1   | 0.045  | NA |
| chr2 | 102972118 | 102972596 | IL18R1     | ENSG00000115604 | -32  | 0.27 | 0.19 | 0.1   | 0.081  | NA |
| chr2 | 132057741 | 132058096 | AC131180.3 | ENSG00000236516 | 99   | 0.95 | 0.62 | 0.1   | 0.32   | NA |
| chr2 | 154334449 | 154335458 | RPRM       | ENSG00000177519 | 369  | 0.18 | 0.24 | 0.1   | -0.054 | NA |
| chr2 | 217497811 | 217498847 | IGFBP2     | ENSG00000115457 | 211  | 0.23 | 0.18 | 0.1   | 0.044  | NA |

|      |           |           |            |                 |       |      |      |      |        |    |
|------|-----------|-----------|------------|-----------------|-------|------|------|------|--------|----|
| chr2 | 224903221 | 224904735 | SERPINE2   | ENSG00000135919 | -457  | 0.23 | 0.18 | 0.1  | 0.044  | NA |
| chr2 | 23749086  | 23749291  | AC011239.1 | ENSG00000224361 | -1974 | 1    | 0.78 | 0.11 | 0.22   | NA |
| chr2 | 24307026  | 24307678  | TP53I3     | ENSG00000115129 | -171  | 0.24 | 0.18 | 0.11 | 0.062  | NA |
| chr2 | 71680558  | 71681276  | DYSF       | ENSG00000135636 | 65    | 0.24 | 0.33 | 0.11 | -0.085 | NA |
| chr2 | 85838739  | 85839285  | C2orf68    | ENSG00000168887 | -148  | 0.25 | 0.17 | 0.11 | 0.085  | NA |
| chr2 | 86667815  | 86669447  | KDM3A      | ENSG00000115548 | 707   | 0.22 | 0.18 | 0.11 | 0.049  | NA |
| chr2 | 106959115 | 106959526 | AC114755.3 | ENSG00000227513 | -1702 | 0.53 | 0.64 | 0.11 | -0.12  | NA |
| chr2 | 113521918 | 113522574 | CKAP2L     | ENSG00000169607 | -52   | 0.26 | 0.19 | 0.11 | 0.068  | NA |
| chr2 | 144694666 | 144695180 | AC016910.1 | ENSG00000232377 | 283   | 0.2  | 0.14 | 0.11 | 0.055  | NA |
| chr2 | 190539026 | 190539533 | ANKAR      | ENSG00000151687 | -54   | 0.23 | 0.32 | 0.11 | -0.096 | NA |
| chr2 | 201981062 | 201981689 | CFLAR      | ENSG00000003402 | 245   | 0.27 | 0.2  | 0.11 | 0.063  | NA |
| chr2 | 216877899 | 216878352 | MREG       | ENSG00000118242 | 119   | 0.24 | 0.13 | 0.11 | 0.11   | NA |
| chr2 | 219857682 | 219858917 | CRYBA2     | ENSG00000163499 | -399  | 0.28 | 0.22 | 0.11 | 0.063  | NA |
| chr2 | 3381344   | 3381912   | TSSC1      | ENSG00000032389 | -76   | 0.23 | 0.14 | 0.12 | 0.097  | NA |
| chr2 | 11886249  | 11887207  | LPIN1      | ENSG00000134324 | 14    | 0.25 | 0.18 | 0.12 | 0.065  | NA |
| chr2 | 21022564  | 21022934  | C2orf43    | ENSG00000118961 | 81    | 0.16 | 0.24 | 0.12 | -0.085 | NA |
| chr2 | 25391072  | 25391875  | POMC       | ENSG00000115138 | -33   | 0.15 | 0.22 | 0.12 | -0.072 | NA |
| chr2 | 28789559  | 28789933  | PLB1       | ENSG00000163803 | 436   | 0.2  | 0.32 | 0.12 | -0.12  | NA |
| chr2 | 33824310  | 33824857  | FAM98A     | ENSG00000119812 | -239  | 0.14 | 0.2  | 0.12 | -0.055 | NA |
| chr2 | 69968749  | 69969592  | ANXA4      | ENSG00000196975 | 64    | 0.23 | 0.29 | 0.12 | -0.06  | NA |
| chr2 | 110962400 | 110962631 | NPHP1      | ENSG00000144061 | 23    | 0.71 | 0.4  | 0.12 | 0.31   | NA |
| chr2 | 122287620 | 122288332 | CLASP1     | ENSG00000074054 | 345   | 0.21 | 0.15 | 0.12 | 0.063  | NA |
| chr2 | 173940414 | 173941271 | AC013461.1 | ENSG00000091436 | 400   | 0.24 | 0.18 | 0.12 | 0.051  | NA |
| chr2 | 176982107 | 176982402 | HOXD10     | ENSG00000128710 | 947   | 0.62 | 0.12 | 0.12 | 0.5    | NA |
| chr2 | 219744986 | 219745780 | WNT10A     | ENSG00000135925 | 298   | 0.3  | 0.19 | 0.12 | 0.1    | NA |
| chr2 | 228736230 | 228736544 | WDR69      | ENSG00000123977 | 64    | 0.25 | 0.17 | 0.12 | 0.077  | NA |
| chr2 | 14772377  | 14775809  | FAM84A     | ENSG00000162981 | 1283  | 0.22 | 0.19 | 0.13 | 0.035  | NA |
| chr2 | 73297630  | 73299155  | SFXN5      | ENSG00000144040 | -696  | 0.18 | 0.22 | 0.13 | -0.041 | NA |
| chr2 | 96190971  | 96191377  | AC009237.8 | ENSG00000213283 | 81    | 0.98 | 0.94 | 0.13 | 0.044  | NA |
| chr2 | 130737205 | 130737718 | RAB6C      | ENSG00000222014 | 226   | 0.29 | 0.19 | 0.13 | 0.095  | NA |

|      |           |           |            |                 |       |      |      |      |        |    |
|------|-----------|-----------|------------|-----------------|-------|------|------|------|--------|----|
| chr2 | 136633363 | 136634229 | MCM6       | ENSG00000076003 | 200   | 0.21 | 0.16 | 0.13 | 0.044  | NA |
| chr2 | 153191492 | 153192974 | FMNL2      | ENSG00000157827 | 482   | 0.26 | 0.32 | 0.13 | -0.06  | NA |
| chr2 | 157189057 | 157191437 | NR4A2      | ENSG00000153234 | -1023 | 0.29 | 0.23 | 0.13 | 0.061  | NA |
| chr2 | 168572549 | 168572834 | CTAGE14P   | ENSG00000214211 | -116  | 0.98 | 0.94 | 0.13 | 0.044  | NA |
| chr2 | 169102950 | 169104454 | STK39      | ENSG00000198648 | 949   | 0.21 | 0.17 | 0.13 | 0.041  | NA |
| chr2 | 197664212 | 197664572 | GTF3C3     | ENSG00000119041 | -153  | 0.32 | 0.16 | 0.13 | 0.15   | NA |
| chr2 | 203499508 | 203500697 | FAM117B    | ENSG00000138439 | 201   | 0.23 | 0.16 | 0.13 | 0.069  | NA |
| chr2 | 223725558 | 223726423 | ACSL3      | ENSG00000123983 | 338   | 0.28 | 0.21 | 0.13 | 0.07   | NA |
| chr2 | 242041543 | 242042026 | MTERFD2    | ENSG00000122085 | -177  | 0.23 | 0.17 | 0.13 | 0.059  | NA |
| chr2 | 52798403  | 52800057  | AC139712.2 | ENSG00000204993 | 1444  | 0.97 | 0.95 | 0.14 | 0.022  | NA |
| chr2 | 55276555  | 55278044  | RTN4       | ENSG00000115310 | -523  | 0.24 | 0.19 | 0.14 | 0.05   | NA |
| chr2 | 55496073  | 55496565  | MTIF2      | ENSG00000085760 | -145  | 0.25 | 0.16 | 0.14 | 0.092  | NA |
| chr2 | 109402907 | 109403566 | CCDC138    | ENSG00000163006 | 23    | 0.19 | 0.14 | 0.14 | 0.05   | NA |
| chr2 | 120189022 | 120189765 | TMEM37     | ENSG00000171227 | -52   | 0.2  | 0.25 | 0.14 | -0.051 | NA |
| chr2 | 133013777 | 133015740 | MIR663B    | ENSG00000221288 | -105  | 0.45 | 0.43 | 0.14 | 0.022  | NA |
| chr2 | 169746719 | 169747005 | SPC25      | ENSG00000152253 | 93    | 0.14 | 0.4  | 0.14 | -0.26  | NA |
| chr2 | 171670110 | 171670549 | GAD1       | ENSG00000128683 | 606   | 0.49 | 0.33 | 0.14 | 0.16   | NA |
| chr2 | 220117937 | 220119334 | TUBA4B     | ENSG00000243910 | 670   | 0.28 | 0.22 | 0.14 | 0.057  | NA |
| chr2 | 220173021 | 220173271 | PTPRN      | ENSG00000054356 | -84   | 0.2  | 1    | 0.14 | -0.8   | NA |
| chr2 | 24300060  | 24300294  | AC008073.1 | ENSG00000219626 | 379   | 0.27 | 0.12 | 0.15 | 0.14   | NA |
| chr2 | 87302522  | 87304571  | AC125232.1 | ENSG00000231259 | -10   | 0.23 | 0.17 | 0.15 | 0.054  | NA |
| chr2 | 127863642 | 127865288 | BIN1       | ENSG00000136717 | 112   | 0.21 | 0.18 | 0.15 | 0.038  | NA |
| chr2 | 148778222 | 148778530 | ORC4       | ENSG00000115947 | -84   | 0.28 | 1    | 0.15 | -0.72  | NA |
| chr2 | 149632682 | 149633882 | KIF5C      | ENSG00000168280 | 463   | 0.3  | 0.25 | 0.15 | 0.056  | NA |
| chr2 | 191272484 | 191273671 | MFSD6      | ENSG00000151690 | -4    | 0.21 | 0.17 | 0.15 | 0.042  | NA |
| chr2 | 203638927 | 203639157 | AC098831.4 | ENSG00000240761 | 41    | 0.99 | 0.92 | 0.15 | 0.066  | NA |
| chr2 | 1842846   | 1843137   | MYT1L      | ENSG00000186487 | 1560  | 0.93 | 1    | 0.16 | -0.069 | NA |
| chr2 | 8818292   | 8818503   | AC011747.7 | ENSG00000235092 | 67    | 0.31 | 0.8  | 0.16 | -0.49  | NA |
| chr2 | 26467102  | 26467946  | HADHA      | ENSG00000084754 | -49   | 0.22 | 0.17 | 0.16 | 0.052  | NA |
| chr2 | 64836206  | 64836765  | AC007365.1 | ENSG00000233694 | 1990  | 0.23 | 0.18 | 0.16 | 0.057  | NA |

|      |           |           |            |                 |       |      |      |      |        |    |
|------|-----------|-----------|------------|-----------------|-------|------|------|------|--------|----|
| chr2 | 85843208  | 85843677  | USP39      | ENSG00000168883 | 227   | 0.25 | 0.17 | 0.16 | 0.081  | NA |
| chr2 | 87140786  | 87141107  | RGPD1      | ENSG00000187627 | 11    | 0.94 | 0.98 | 0.16 | -0.04  | NA |
| chr2 | 88751335  | 88752865  | FOXI3      | ENSG00000214336 | -47   | 0.3  | 0.23 | 0.16 | 0.072  | NA |
| chr2 | 131513363 | 131514183 | AC140481.8 | ENSG00000229797 | -365  | 0.16 | 0.21 | 0.16 | -0.056 | NA |
| chr2 | 176949993 | 176950336 | EVX2       | ENSG00000174279 | -1523 | 0.23 | 0.14 | 0.16 | 0.083  | NA |
| chr2 | 200820053 | 200820716 | TYW5       | ENSG00000162971 | -161  | 0.25 | 0.32 | 0.16 | -0.069 | NA |
| chr2 | 219523901 | 219524577 | BCS1L      | ENSG00000074582 | 140   | 0.22 | 0.17 | 0.16 | 0.05   | NA |
| chr2 | 220024750 | 220025510 | NHEJ1      | ENSG00000187736 | 147   | 0.2  | 0.14 | 0.16 | 0.055  | NA |
| chr2 | 242799488 | 242799696 | PDCD1      | ENSG00000188389 | 1425  | 0.94 | 1    | 0.16 | -0.062 | NA |
| chr2 | 10260279  | 10260931  | RRM2       | ENSG00000171848 | -1850 | 0.22 | 0.16 | 0.17 | 0.058  | NA |
| chr2 | 15701139  | 15701517  | NBAS       | ENSG00000151779 | 126   | 0.2  | 0.32 | 0.17 | -0.12  | NA |
| chr2 | 103235376 | 103236554 | SLC9A2     | ENSG00000115616 | -201  | 0.21 | 0.16 | 0.17 | 0.047  | NA |
| chr2 | 105953744 | 105954249 | C2orf49    | ENSG00000135974 | 180   | 0.23 | 0.34 | 0.17 | -0.11  | NA |
| chr2 | 111435318 | 111435884 | BUB1       | ENSG00000169679 | 4     | 0.4  | 0.3  | 0.17 | 0.098  | NA |
| chr2 | 183902402 | 183903625 | NCKAP1     | ENSG00000061676 | 187   | 0.26 | 0.21 | 0.17 | 0.046  | NA |
| chr2 | 191878608 | 191879253 | STAT1      | ENSG00000115415 | -249  | 0.39 | 0.24 | 0.17 | 0.15   | NA |
| chr2 | 201171200 | 201172492 | SPATS2L    | ENSG00000196141 | 599   | 0.17 | 0.2  | 0.17 | -0.033 | NA |
| chr2 | 202315853 | 202317008 | TRAK2      | ENSG00000115993 | -254  | 0.2  | 0.16 | 0.17 | 0.041  | NA |
| chr2 | 213402180 | 213403867 | ERBB4      | ENSG00000178568 | 230   | 0.27 | 0.22 | 0.17 | 0.043  | NA |
| chr2 | 233470646 | 233471077 | EFHD1      | ENSG00000115468 | 94    | 0.23 | 0.17 | 0.17 | 0.053  | NA |
| chr2 | 9143127   | 9144630   | MBOAT2     | ENSG00000143797 | -91   | 0.22 | 0.19 | 0.18 | 0.031  | NA |
| chr2 | 27592845  | 27594099  | EIF2B4     | ENSG00000115211 | -592  | 0.27 | 0.22 | 0.18 | 0.051  | NA |
| chr2 | 70313200  | 70315490  | AC136007.2 | ENSG00000179818 | -1115 | 0.27 | 0.23 | 0.18 | 0.043  | NA |
| chr2 | 128283578 | 128284524 | IWS1       | ENSG00000163166 | -35   | 0.3  | 0.22 | 0.18 | 0.083  | NA |
| chr2 | 231729631 | 231730821 | ITM2C      | ENSG00000135916 | 563   | 0.21 | 0.26 | 0.18 | -0.048 | NA |
| chr2 | 27579296  | 27580135  | GTF3C2     | ENSG00000115207 | -356  | 0.19 | 0.24 | 0.19 | -0.055 | NA |
| chr2 | 48009808  | 48011443  | MSH6       | ENSG00000116062 | 404   | 0.24 | 0.19 | 0.19 | 0.043  | NA |
| chr2 | 65092220  | 65092640  | AC007880.1 | ENSG00000234572 | -1670 | 0.25 | 0.19 | 0.19 | 0.068  | NA |
| chr2 | 84686005  | 84686751  | SUCLG1     | ENSG00000163541 | -18   | 0.18 | 0.26 | 0.19 | -0.08  | NA |
| chr2 | 109744585 | 109746833 | SH3RF3     | ENSG00000172985 | -95   | 0.27 | 0.24 | 0.19 | 0.031  | NA |

|      |           |           |             |                  |       |      |      |      |        |    |
|------|-----------|-----------|-------------|------------------|-------|------|------|------|--------|----|
| chr2 | 119981079 | 119981818 | STEAP3      | ENSG00000115107  | 64    | 0.4  | 0.33 | 0.19 | 0.061  | NA |
| chr2 | 240112234 | 240112435 | HDAC4       | ENSG00000068024  | 418   | 1    | 0.94 | 0.19 | 0.06   | NA |
| chr2 | 39893121  | 39893496  | TMEM178     | ENSG00000152154  | 193   | 0.21 | 0.15 | 0.2  | 0.056  | NA |
| chr2 | 85829266  | 85830237  | TMEM150A    | ENSG00000168890  | -212  | 0.24 | 0.31 | 0.2  | -0.067 | NA |
| chr2 | 95787089  | 95787951  | MRPS5       | ENSG00000144029  | 24    | 0.23 | 0.15 | 0.2  | 0.078  | NA |
| chr2 | 176989337 | 176989587 | HOXD9       | ENSG00000128709  | 1880  | 0.54 | 1    | 0.2  | -0.46  | NA |
| chr2 | 189156416 | 189157719 | GULP1       | ENSG00000144366  | 633   | 0.17 | 0.13 | 0.2  | 0.037  | NA |
| chr2 | 207023910 | 207024981 | NDUFS1      | ENSG00000023228  | -527  | 0.22 | 0.18 | 0.2  | 0.045  | NA |
| chr2 | 220222902 | 220223854 | AC053503.2  | ENSG000000232789 | 327   | 0.28 | 0.21 | 0.2  | 0.074  | NA |
| chr2 | 239072191 | 239073109 | FAM132B     | ENSG00000178752  | 367   | 0.21 | 0.26 | 0.2  | -0.053 | NA |
| chr2 | 241562469 | 241562910 | GPR35       | ENSG00000178623  | -1973 | 0.39 | 0.22 | 0.2  | 0.17   | NA |
| chr2 | 32502965  | 32503471  | YIPF4       | ENSG00000119820  | 239   | 0.21 | 0.16 | 0.21 | 0.05   | NA |
| chr2 | 66661118  | 66661657  | AC092669.5  | ENSG000000226819 | -785  | 0.28 | 0.16 | 0.21 | 0.12   | NA |
| chr2 | 74709164  | 74710110  | CCDC142     | ENSG00000135637  | 32    | 0.2  | 0.16 | 0.21 | 0.045  | NA |
| chr2 | 85788411  | 85788739  | GGCX        | ENSG00000115486  | 21    | 0.15 | 0.11 | 0.21 | 0.041  | NA |
| chr2 | 101179318 | 101180081 | PDCL3       | ENSG00000115539  | -21   | 0.24 | 0.32 | 0.21 | -0.079 | NA |
| chr2 | 114647669 | 114648312 | ACTR3       | ENSG00000115091  | 320   | 0.25 | 0.16 | 0.21 | 0.081  | NA |
| chr2 | 128568321 | 128569064 | WDR33       | ENSG00000136709  | -165  | 0.29 | 0.18 | 0.21 | 0.11   | NA |
| chr2 | 203239865 | 203242418 | BMPR2       | ENSG000000204217 | -518  | 0.2  | 0.24 | 0.21 | -0.036 | NA |
| chr2 | 25563309  | 25563661  | DNMT3A      | ENSG00000119772  | 1269  | 0.21 | 0.5  | 0.22 | -0.29  | NA |
| chr2 | 65356735  | 65357614  | RAB1A       | ENSG00000138069  | 46    | 0.21 | 0.16 | 0.22 | 0.046  | NA |
| chr2 | 97001429  | 97001898  | NCAPH       | ENSG00000121152  | 138   | 0.19 | 0.13 | 0.22 | 0.059  | NA |
| chr2 | 130970933 | 130971242 | RHOQP3      | ENSG000000230756 | -24   | 0.37 | 0.21 | 0.22 | 0.15   | NA |
| chr2 | 149401671 | 149403498 | EPC2        | ENSG00000135999  | 575   | 0.25 | 0.29 | 0.22 | -0.042 | NA |
| chr2 | 224821928 | 224822575 | MRPL44      | ENSG00000135900  | 130   | 0.28 | 0.23 | 0.22 | 0.053  | NA |
| chr2 | 242664207 | 242665154 | AC114730.11 | ENSG000000235351 | 428   | 0.97 | 0.95 | 0.22 | 0.028  | NA |
| chr2 | 28113060  | 28113764  | RBKS        | ENSG00000171174  | -195  | 0.12 | 0.17 | 0.23 | -0.047 | NA |
| chr2 | 74648512  | 74649419  | C2orf81     | ENSG00000159239  | -247  | 0.27 | 0.19 | 0.23 | 0.083  | NA |
| chr2 | 88990969  | 88991587  | RPIA        | ENSG00000153574  | 116   | 0.19 | 0.24 | 0.23 | -0.043 | NA |
| chr2 | 96873851  | 96874824  | STARD7      | ENSG00000084090  | -418  | 0.22 | 0.16 | 0.23 | 0.059  | NA |



|      |           |           |            |                 |      |      |      |      |        |    |
|------|-----------|-----------|------------|-----------------|------|------|------|------|--------|----|
| chr2 | 122406398 | 122407824 | CLASP1     | ENSG00000074054 | -59  | 0.29 | 0.24 | 0.23 | 0.048  | NA |
| chr2 | 176986424 | 176988291 | HOXD9      | ENSG00000128709 | 269  | 0.31 | 0.27 | 0.23 | 0.043  | NA |
| chr2 | 219575448 | 219576080 | TTLL4      | ENSG00000135912 | 196  | 0.3  | 0.19 | 0.23 | 0.11   | NA |
| chr2 | 241858187 | 241858535 | AC104809.3 | ENSG00000226321 | 159  | 0.94 | 0.98 | 0.23 | -0.036 | NA |
| chr2 | 676651    | 677678    | TMEM18     | ENSG00000151353 | -502 | 0.23 | 0.28 | 0.24 | -0.049 | NA |
| chr2 | 86789974  | 86790642  | VPS24      | ENSG00000115561 | -19  | 0.2  | 0.26 | 0.24 | -0.057 | NA |
| chr2 | 112655491 | 112655727 | MERTK      | ENSG00000153208 | -447 | 0.36 | 0.17 | 0.24 | 0.18   | NA |
| chr2 | 158484858 | 158485695 | ACVR1C     | ENSG00000123612 | -37  | 0.24 | 0.18 | 0.24 | 0.06   | NA |
| chr2 | 163200575 | 163201025 | GCA        | ENSG00000115271 | 202  | 0.16 | 0.21 | 0.24 | -0.047 | NA |
| chr2 | 206949712 | 206950613 | AC007383.3 | ENSG00000227946 | -84  | 0.28 | 0.22 | 0.24 | 0.054  | NA |
| chr2 | 208576001 | 208577106 | CCNYL1     | ENSG00000163249 | 289  | 0.22 | 0.18 | 0.24 | 0.036  | NA |
| chr2 | 220093972 | 220094697 | ATG9A      | ENSG00000198925 | -287 | 0.26 | 0.2  | 0.24 | 0.057  | NA |
| chr2 | 242640843 | 242642456 | ING5       | ENSG00000168395 | 199  | 0.23 | 0.19 | 0.24 | 0.036  | NA |
| chr2 | 263400    | 265238    | SH3YL1     | ENSG00000035115 | -336 | 0.26 | 0.3  | 0.25 | -0.048 | NA |
| chr2 | 5832041   | 5834208   | SOX11      | ENSG00000176887 | 325  | 0.22 | 0.2  | 0.25 | 0.026  | NA |
| chr2 | 105760109 | 105761018 | AC104655.3 | ENSG00000226508 | -8   | 0.3  | 0.25 | 0.25 | 0.058  | NA |
| chr2 | 106361032 | 106362218 | NCK2       | ENSG00000071051 | 271  | 0.18 | 0.21 | 0.25 | -0.027 | NA |
| chr2 | 118572112 | 118572627 | DDX18      | ENSG00000088205 | 143  | 0.2  | 0.15 | 0.25 | 0.054  | NA |
| chr2 | 118845668 | 118846170 | INSIG2     | ENSG00000125629 | -109 | 0.22 | 0.28 | 0.25 | -0.058 | NA |
| chr2 | 177024501 | 177025692 | HOXD3      | ENSG00000128652 | -523 | 0.26 | 0.34 | 0.25 | -0.082 | NA |
| chr2 | 201675989 | 201677306 | BZW1       | ENSG00000082153 | 378  | 0.24 | 0.2  | 0.25 | 0.042  | NA |
| chr2 | 9983263   | 9983901   | TAF1B      | ENSG00000115750 | 99   | 0.25 | 0.19 | 0.26 | 0.059  | NA |
| chr2 | 47796923  | 47799166  | KCNK12     | ENSG00000184261 | -590 | 0.19 | 0.17 | 0.26 | 0.021  | NA |
| chr2 | 81694322  | 81694681  | AC012075.2 | ENSG00000235519 | -431 | 0.95 | 0.98 | 0.26 | -0.034 | NA |
| chr2 | 96987027  | 96987888  | AC021188.4 | ENSG00000230747 | 12   | 0.21 | 0.29 | 0.26 | -0.079 | NA |
| chr2 | 118770859 | 118771868 | CCDC93     | ENSG00000125633 | 346  | 0.21 | 0.17 | 0.26 | 0.04   | NA |
| chr2 | 130938840 | 130940428 | SMPD4      | ENSG00000136699 | -519 | 0.18 | 0.21 | 0.26 | -0.033 | NA |
| chr2 | 240061326 | 240061602 | HDAC4      | ENSG00000068024 | 1205 | 0.99 | 0.96 | 0.26 | 0.028  | NA |
| chr2 | 5836068   | 5837643   | AC010729.1 | ENSG00000242540 | 503  | 0.21 | 0.18 | 0.27 | 0.03   | NA |
| chr2 | 10090907  | 10092456  | GRHL1      | ENSG00000134317 | -111 | 0.18 | 0.21 | 0.27 | -0.026 | NA |

|      |           |           |             |                 |      |      |      |      |        |    |
|------|-----------|-----------|-------------|-----------------|------|------|------|------|--------|----|
| chr2 | 64880319  | 64881868  | SERTAD2     | ENSG00000179833 | -46  | 0.19 | 0.16 | 0.27 | 0.031  | NA |
| chr2 | 74756223  | 74757930  | HTRA2       | ENSG00000115317 | 572  | 0.22 | 0.19 | 0.27 | 0.029  | NA |
| chr2 | 84743463  | 84743685  | DNAH6       | ENSG00000115423 | -5   | 0.13 | 0.5  | 0.27 | -0.37  | NA |
| chr2 | 92027831  | 92028422  | AC127391.2  | ENSG00000214330 | -501 | 0.33 | 0.4  | 0.27 | -0.07  | NA |
| chr2 | 128642787 | 128644407 | AMMECR1L    | ENSG00000144233 | -101 | 0.23 | 0.18 | 0.27 | 0.046  | NA |
| chr2 | 128784499 | 128786247 | SAP130      | ENSG00000136715 | -506 | 0.2  | 0.17 | 0.27 | 0.025  | NA |
| chr2 | 177042751 | 177043444 | AC009336.23 | ENSG00000224189 | -327 | 0.23 | 0.31 | 0.27 | -0.084 | NA |
| chr2 | 216946324 | 216946734 | PECR        | ENSG00000115425 | -61  | 0.19 | 0.28 | 0.27 | -0.094 | NA |
| chr2 | 242787133 | 242787414 | AC114730.2  | ENSG00000235151 | 741  | 0.43 | 0.59 | 0.27 | -0.16  | NA |
| chr2 | 64370888  | 64371811  | PELI1       | ENSG00000197329 | 147  | 0.27 | 0.23 | 0.28 | 0.042  | NA |
| chr2 | 71503547  | 71504233  | ZNF638      | ENSG00000075292 | 199  | 0.18 | 0.12 | 0.28 | 0.06   | NA |
| chr2 | 175869574 | 175870289 | CHN1        | ENSG00000128656 | 16   | 0.22 | 0.17 | 0.28 | 0.047  | NA |
| chr2 | 232394763 | 232395337 | NMUR1       | ENSG00000171596 | 156  | 0.22 | 0.16 | 0.28 | 0.055  | NA |
| chr2 | 3452346   | 3452582   | TTC15       | ENSG00000171853 | -503 | 1    | 0.95 | 0.29 | 0.048  | NA |
| chr2 | 120301702 | 120302455 | AC069154.2  | ENSG00000163075 | 70   | 0.21 | 0.25 | 0.29 | -0.043 | NA |
| chr2 | 157198068 | 157199346 | NR4A2       | ENSG00000153234 | 153  | 0.21 | 0.24 | 0.29 | -0.032 | NA |
| chr2 | 169312417 | 169313622 | LASS6       | ENSG00000172292 | 260  | 0.21 | 0.26 | 0.29 | -0.049 | NA |
| chr2 | 191044979 | 191045829 | C2orf88     | ENSG00000187699 | 196  | 0.25 | 0.21 | 0.29 | 0.045  | NA |
| chr2 | 26100513  | 26101653  | ASXL2       | ENSG00000143970 | 252  | 0.22 | 0.19 | 0.3  | 0.027  | NA |
| chr2 | 28974212  | 28975388  | PPP1CB      | ENSG00000213639 | 294  | 0.2  | 0.23 | 0.3  | -0.029 | NA |
| chr2 | 45181890  | 45183111  | AC012354.6  | ENSG00000225156 | 697  | 0.23 | 0.5  | 0.3  | -0.27  | NA |
| chr2 | 47630067  | 47630791  | MSH2        | ENSG00000095002 | 321  | 0.25 | 0.19 | 0.3  | 0.057  | NA |
| chr2 | 69614119  | 69614616  | GFPT1       | ENSG00000198380 | 13   | 0.18 | 0.14 | 0.3  | 0.044  | NA |
| chr2 | 71205563  | 71206529  | ANKRD53     | ENSG00000144031 | 464  | 0.21 | 0.28 | 0.3  | -0.072 | NA |
| chr2 | 121104712 | 121104935 | INHBB       | ENSG00000163083 | 1104 | 0.17 | 0.26 | 0.3  | -0.084 | NA |
| chr2 | 201374435 | 201374968 | SGOL2       | ENSG00000163535 | -30  | 0.22 | 0.17 | 0.3  | 0.043  | NA |
| chr2 | 223167205 | 223167560 | CCDC140     | ENSG00000163081 | -315 | 0.39 | 0.47 | 0.3  | -0.08  | NA |
| chr2 | 230135708 | 230136004 | PID1        | ENSG00000153823 | 99   | 0.18 | 0.23 | 0.3  | -0.051 | NA |
| chr2 | 61765406  | 61766091  | XPO1        | ENSG00000082898 | -330 | 0.19 | 0.24 | 0.31 | -0.053 | NA |
| chr2 | 96192055  | 96193072  | AC009237.8  | ENSG00000213283 | 1470 | 0.22 | 0.28 | 0.31 | -0.053 | NA |

|      |           |           |            |                 |      |      |      |      |        |    |
|------|-----------|-----------|------------|-----------------|------|------|------|------|--------|----|
| chr2 | 98206120  | 98207224  | ANKRD36B   | ENSG00000196912 | -488 | 0.31 | 0.16 | 0.31 | 0.15   | NA |
| chr2 | 161263871 | 161264460 | RBMS1      | ENSG00000153250 | 235  | 0.35 | 0.22 | 0.31 | 0.13   | NA |
| chr2 | 171678546 | 171680358 | GAD1       | ENSG00000128683 | 855  | 0.25 | 0.32 | 0.31 | -0.062 | NA |
| chr2 | 172964762 | 172967857 | DLX2       | ENSG00000115844 | 1319 | 0.26 | 0.24 | 0.31 | 0.024  | NA |
| chr2 | 220159438 | 220159977 | MIR153-1   | ENSG00000207647 | -785 | 0.29 | 0.22 | 0.31 | 0.068  | NA |
| chr2 | 232262854 | 232263544 | B3GNT7     | ENSG00000156966 | 1312 | 0.93 | 0.96 | 0.31 | -0.026 | NA |
| chr2 | 232791575 | 232792016 | NPPC       | ENSG00000163273 | -682 | 1    | 0.39 | 0.31 | 0.61   | NA |
| chr2 | 71295160  | 71296002  | NAGK       | ENSG00000124357 | 173  | 0.18 | 0.25 | 0.32 | -0.07  | NA |
| chr2 | 97426335  | 97426554  | CNNM4      | ENSG00000158158 | -195 | 0.17 | 0.3  | 0.32 | -0.13  | NA |
| chr2 | 152684475 | 152685131 | ARL5A      | ENSG00000162980 | 152  | 0.3  | 0.19 | 0.32 | 0.11   | NA |
| chr2 | 154727906 | 154728271 | GALNT13    | ENSG00000144278 | -338 | 0.25 | 0.2  | 0.32 | 0.054  | NA |
| chr2 | 8821990   | 8822739   | AC011747.7 | ENSG00000235092 | -371 | 0.23 | 0.3  | 0.33 | -0.068 | NA |
| chr2 | 96971125  | 96971556  | SNRNP200   | ENSG00000144028 | -108 | 0.24 | 0.17 | 0.33 | 0.074  | NA |
| chr2 | 101618247 | 101618658 | RPL31      | ENSG00000071082 | -239 | 0.32 | 0.43 | 0.33 | -0.11  | NA |
| chr2 | 113341684 | 113342453 | CHCHD5     | ENSG00000125611 | 251  | 0.42 | 0.31 | 0.33 | 0.12   | NA |
| chr2 | 203102615 | 203103328 | SUMO1      | ENSG00000116030 | 214  | 0.22 | 0.32 | 0.33 | -0.1   | NA |
| chr2 | 220462307 | 220462944 | STK11IP    | ENSG00000144589 | 43   | 0.24 | 0.18 | 0.33 | 0.055  | NA |
| chr2 | 233415005 | 233415811 | TIGD1      | ENSG00000221944 | -182 | 0.28 | 0.23 | 0.33 | 0.057  | NA |
| chr2 | 20251040  | 20251864  | LAPTM4A    | ENSG00000068697 | 337  | 0.19 | 0.14 | 0.34 | 0.043  | NA |
| chr2 | 102090370 | 102091130 | RFX8       | ENSG00000196460 | -13  | 0.2  | 0.17 | 0.34 | 0.033  | NA |
| chr2 | 128458844 | 128459937 | SFT2D3     | ENSG00000173349 | 793  | 0.24 | 0.19 | 0.34 | 0.043  | NA |
| chr2 | 152266271 | 152267286 | RIF1       | ENSG00000080345 | 381  | 0.26 | 0.22 | 0.34 | 0.034  | NA |
| chr2 | 183731819 | 183732093 | FRZB       | ENSG00000162998 | -66  | 0.25 | 0.2  | 0.34 | 0.055  | NA |
| chr2 | 197457392 | 197458522 | HECW2      | ENSG00000138411 | 321  | 0.22 | 0.18 | 0.34 | 0.04   | NA |
| chr2 | 206546603 | 206547566 | NRP2       | ENSG00000118257 | 370  | 0.24 | 0.21 | 0.34 | 0.03   | NA |
| chr2 | 208890181 | 208890394 | PLEKHM3    | ENSG00000178385 | -65  | 0.16 | 0.23 | 0.34 | -0.068 | NA |
| chr2 | 64245934  | 64246893  | VPS54      | ENSG00000143952 | -207 | 0.2  | 0.23 | 0.35 | -0.032 | NA |
| chr2 | 101767042 | 101768259 | TBC1D8     | ENSG00000204634 | 65   | 0.29 | 0.34 | 0.35 | -0.054 | NA |
| chr2 | 165697470 | 165698893 | COBLL1     | ENSG00000082438 | -450 | 0.24 | 0.28 | 0.35 | -0.039 | NA |
| chr2 | 220492105 | 220492748 | SLC4A3     | ENSG00000114923 | 310  | 0.26 | 0.2  | 0.35 | 0.059  | NA |

|      |           |           |            |                 |       |      |      |      |        |    |
|------|-----------|-----------|------------|-----------------|-------|------|------|------|--------|----|
| chr2 | 27341567  | 27341923  | CGREF1     | ENSG00000138028 | 28    | 0.35 | 0.25 | 0.36 | 0.11   | NA |
| chr2 | 68384184  | 68385241  | WDR92      | ENSG00000243667 | -107  | 0.23 | 0.19 | 0.36 | 0.044  | NA |
| chr2 | 136742687 | 136743595 | AC093391.2 | ENSG00000231890 | 395   | 0.23 | 0.19 | 0.36 | 0.045  | NA |
| chr2 | 160654229 | 160654631 | CD302      | ENSG00000241399 | 323   | 0.27 | 0.22 | 0.36 | 0.054  | NA |
| chr2 | 214148957 | 214149426 | SPAG16     | ENSG00000144451 | 78    | 0.17 | 0.23 | 0.36 | -0.058 | NA |
| chr2 | 220041129 | 220043410 | CNPPD1     | ENSG00000115649 | -649  | 0.22 | 0.19 | 0.36 | 0.028  | NA |
| chr2 | 40678477  | 40678717  | SLC8A1     | ENSG00000183023 | 551   | 0.17 | 0.5  | 0.37 | -0.33  | NA |
| chr2 | 79739696  | 79740243  | CTNNA2     | ENSG00000066032 | -157  | 0.14 | 0.67 | 0.37 | -0.52  | NA |
| chr2 | 85765695  | 85766983  | MAT2A      | ENSG00000168906 | 51    | 0.22 | 0.2  | 0.37 | 0.028  | NA |
| chr2 | 208489428 | 208491030 | METTL21A   | ENSG00000144401 | -522  | 0.25 | 0.22 | 0.37 | 0.033  | NA |
| chr2 | 210674028 | 210674249 | SNAI1P1    | ENSG00000237194 | 610   | 0.92 | 0.98 | 0.37 | -0.06  | NA |
| chr2 | 215673995 | 215675052 | BARD1      | ENSG00000138376 | -139  | 0.27 | 0.24 | 0.37 | 0.034  | NA |
| chr2 | 220434859 | 220436179 | OBSL1      | ENSG00000124006 | -58   | 0.26 | 0.22 | 0.37 | 0.033  | NA |
| chr2 | 64978121  | 64978924  | SERTAD2    | ENSG00000179833 | -1073 | 0.21 | 0.26 | 0.38 | -0.044 | NA |
| chr2 | 73114219  | 73114920  | SPR        | ENSG00000116096 | 80    | 0.21 | 0.18 | 0.38 | 0.035  | NA |
| chr2 | 180871627 | 180871874 | CWC22      | ENSG00000163510 | 30    | 0.25 | 0.2  | 0.38 | 0.05   | NA |
| chr2 | 191399089 | 191399742 | TMEM194B   | ENSG00000189362 | -11   | 0.16 | 0.19 | 0.38 | -0.026 | NA |
| chr2 | 217277037 | 217277557 | SMARCAL1   | ENSG00000138375 | 160   | 0.19 | 0.11 | 0.38 | 0.081  | NA |
| chr2 | 233765849 | 233766119 | NGEF       | ENSG00000066248 | 166   | 0.76 | 0.87 | 0.38 | -0.11  | NA |
| chr2 | 38829103  | 38830804  | HNRPLL     | ENSG00000143889 | -185  | 0.19 | 0.17 | 0.39 | 0.021  | NA |
| chr2 | 85811340  | 85811855  | VAMP5      | ENSG00000168899 | 66    | 0.23 | 0.17 | 0.39 | 0.064  | NA |
| chr2 | 98962873  | 98964187  | AC092675.4 | ENSG00000227987 | 72    | 0.28 | 0.25 | 0.39 | 0.027  | NA |
| chr2 | 223917576 | 223918037 | KCNE4      | ENSG00000152049 | 888   | 0.93 | 0.83 | 0.39 | 0.094  | NA |
| chr2 | 233283397 | 233285959 | ECEL1P2    | ENSG00000204121 | -152  | 0.18 | 0.16 | 0.39 | 0.023  | NA |
| chr2 | 242254299 | 242256026 | 2-Sep      | ENSG00000168385 | 647   | 0.24 | 0.2  | 0.39 | 0.046  | NA |
| chr2 | 73339292  | 73340733  | RAB11FIP5  | ENSG00000135631 | 134   | 0.15 | 0.18 | 0.4  | -0.03  | NA |
| chr2 | 75185567  | 75186177  | POLE4      | ENSG00000115350 | 253   | 0.21 | 0.16 | 0.4  | 0.052  | NA |
| chr2 | 95831157  | 95831833  | ZNF514     | ENSG00000144026 | -337  | 0.3  | 0.24 | 0.4  | 0.06   | NA |
| chr2 | 136288970 | 136289715 | R3HDM1     | ENSG00000048991 | 317   | 0.19 | 0.23 | 0.4  | -0.042 | NA |
| chr2 | 162930233 | 162930879 | DPP4       | ENSG00000197635 | -44   | 0.26 | 0.3  | 0.4  | -0.048 | NA |

|      |           |           |            |                 |       |      |      |      |        |    |
|------|-----------|-----------|------------|-----------------|-------|------|------|------|--------|----|
| chr2 | 239988450 | 239988710 | HDAC4      | ENSG00000068024 | 97    | 0.91 | 1    | 0.4  | -0.086 | NA |
| chr2 | 1846426   | 1846908   | MYT1L      | ENSG00000186487 | -9    | 0.95 | 1    | 0.41 | -0.053 | NA |
| chr2 | 44222741  | 44223732  | LRPPRC     | ENSG00000138095 | -121  | 0.21 | 0.24 | 0.41 | -0.028 | NA |
| chr2 | 47402809  | 47404105  | CALM2      | ENSG00000143933 | 135   | 0.16 | 0.18 | 0.41 | -0.024 | NA |
| chr2 | 55920780  | 55921143  | PNPT1      | ENSG00000138035 | -3    | 0.15 | 0.22 | 0.41 | -0.07  | NA |
| chr2 | 74229477  | 74229996  | TET3       | ENSG00000187605 | -104  | 0.27 | 0.23 | 0.41 | 0.04   | NA |
| chr2 | 80529677  | 80530846  | LRRTM1     | ENSG00000162951 | 1138  | 0.25 | 0.28 | 0.41 | -0.03  | NA |
| chr2 | 85980499  | 85982198  | ATOH8      | ENSG00000168874 | 331   | 0.27 | 0.24 | 0.41 | 0.02   | NA |
| chr2 | 159313652 | 159314813 | PKP4       | ENSG00000144283 | 265   | 0.2  | 0.16 | 0.41 | 0.041  | NA |
| chr2 | 220196431 | 220196768 | RESP18     | ENSG00000182698 | -699  | 0.6  | 0.33 | 0.41 | 0.26   | NA |
| chr2 | 241992490 | 241992713 | SNED1      | ENSG00000162804 | 1907  | 0.93 | 0.88 | 0.41 | 0.048  | NA |
| chr2 | 23913308  | 23913569  | KLHL29     | ENSG00000119771 | 1783  | 0.95 | 0.97 | 0.42 | -0.025 | NA |
| chr2 | 26915603  | 26916551  | KCNK3      | ENSG00000171303 | 458   | 0.21 | 0.17 | 0.43 | 0.04   | NA |
| chr2 | 32234653  | 32236248  | MEMO1      | ENSG00000162959 | -6    | 0.2  | 0.23 | 0.43 | -0.023 | NA |
| chr2 | 70475427  | 70476151  | TIA1       | ENSG00000116001 | -203  | 0.27 | 0.33 | 0.43 | -0.057 | NA |
| chr2 | 73518364  | 73520986  | EGR4       | ENSG00000135625 | 1154  | 0.2  | 0.18 | 0.43 | 0.02   | NA |
| chr2 | 96068303  | 96068840  | FAHD2A     | ENSG00000115042 | 102   | 0.21 | 0.16 | 0.43 | 0.051  | NA |
| chr2 | 139537692 | 139538650 | NXPH2      | ENSG00000144227 | -253  | 0.23 | 0.27 | 0.43 | -0.041 | NA |
| chr2 | 176992950 | 176993186 | HOXD8      | ENSG00000175879 | -1354 | 0.73 | 0.63 | 0.43 | 0.095  | NA |
| chr2 | 242447017 | 242448558 | STK25      | ENSG00000115694 | -40   | 0.28 | 0.25 | 0.43 | 0.028  | NA |
| chr2 | 25264682  | 25265727  | EFR3B      | ENSG00000084710 | 205   | 0.21 | 0.25 | 0.44 | -0.031 | NA |
| chr2 | 42396301  | 42396933  | EML4       | ENSG00000143924 | 127   | 0.24 | 0.19 | 0.44 | 0.058  | NA |
| chr2 | 44588954  | 44589358  | PREPL      | ENSG00000138078 | -155  | 0.17 | 0.2  | 0.44 | -0.039 | NA |
| chr2 | 56410865  | 56412539  | CCDC85A    | ENSG00000055813 | 444   | 0.18 | 0.21 | 0.44 | -0.027 | NA |
| chr2 | 60687822  | 60688992  | BCL11A     | ENSG00000119866 | -817  | 0.98 | 0.97 | 0.44 | 0.011  | NA |
| chr2 | 223168653 | 223169008 | CCDC140    | ENSG00000163081 | 1133  | 0.55 | 0.49 | 0.44 | 0.064  | NA |
| chr2 | 232120775 | 232121067 | AC018738.2 | ENSG00000237039 | 111   | 1    | 0.95 | 0.44 | 0.051  | NA |
| chr2 | 232571137 | 232575833 | PTMA       | ENSG00000187514 | 1880  | 0.21 | 0.2  | 0.44 | 0.011  | NA |
| chr2 | 234762496 | 234763579 | HJURP      | ENSG00000123485 | 83    | 0.2  | 0.23 | 0.44 | -0.029 | NA |
| chr2 | 239111681 | 239112519 | ILKAP      | ENSG00000132323 | 179   | 0.23 | 0.2  | 0.44 | 0.033  | NA |

|      |           |           |              |                 |       |      |      |      |        |    |
|------|-----------|-----------|--------------|-----------------|-------|------|------|------|--------|----|
| chr2 | 242874772 | 242874988 | AC131097.3   | ENSG00000233806 | -1107 | 0.93 | 0.98 | 0.44 | -0.048 | NA |
| chr2 | 18059493  | 18060920  | KCNS3        | ENSG00000170745 | 272   | 0.17 | 0.19 | 0.45 | -0.024 | NA |
| chr2 | 26568408  | 26569366  | GPR113       | ENSG00000173567 | -217  | 0.21 | 0.24 | 0.45 | -0.026 | NA |
| chr2 | 27070302  | 27072922  | DPYSL5       | ENSG00000157851 | 997   | 0.25 | 0.23 | 0.45 | 0.016  | NA |
| chr2 | 86850042  | 86851178  | RNF103-VPS24 | ENSG00000249884 | -459  | 0.2  | 0.18 | 0.45 | 0.026  | NA |
| chr2 | 88316233  | 88316859  | U2           | ENSG00000222724 | -480  | 0.21 | 0.16 | 0.45 | 0.05   | NA |
| chr2 | 148601280 | 148602859 | ACVR2A       | ENSG00000121989 | -17   | 0.26 | 0.34 | 0.45 | -0.074 | NA |
| chr2 | 234475061 | 234475626 | USP40        | ENSG00000085982 | 13    | 0.2  | 0.1  | 0.45 | 0.1    | NA |
| chr2 | 8723855   | 8724093   | AC011747.4   | ENSG00000236008 | -52   | 0.62 | 0.57 | 0.46 | 0.054  | NA |
| chr2 | 25599676  | 25599895  | AC012074.2   | ENSG00000235072 | -1071 | 0.25 | 0.18 | 0.46 | 0.069  | NA |
| chr2 | 91777180  | 91777968  | AC116050.1   | ENSG00000233991 | 38    | 0.24 | 0.23 | 0.46 | 0.014  | NA |
| chr2 | 159824854 | 159826401 | TANC1        | ENSG00000115183 | 481   | 0.25 | 0.23 | 0.46 | 0.023  | NA |
| chr2 | 168149033 | 168150797 | AC074363.1   | ENSG00000228222 | 234   | 0.18 | 0.2  | 0.46 | -0.025 | NA |
| chr2 | 170655289 | 170655757 | SSB          | ENSG00000138385 | 201   | 0.14 | 0.21 | 0.46 | -0.064 | NA |
| chr2 | 220252008 | 220252638 | DNPEP        | ENSG00000123992 | -255  | 0.21 | 0.17 | 0.46 | 0.034  | NA |
| chr2 | 3383350   | 3383976   | TTC15        | ENSG00000171853 | 217   | 0.2  | 0.16 | 0.47 | 0.043  | NA |
| chr2 | 3504282   | 3504628   | ADI1         | ENSG00000182551 | 132   | 0.94 | 0.97 | 0.47 | -0.036 | NA |
| chr2 | 69664291  | 69664816  | NFU1         | ENSG00000169599 | -26   | 0.2  | 0.17 | 0.47 | 0.029  | NA |
| chr2 | 74725039  | 74727038  | LBX2         | ENSG00000179528 | 456   | 0.2  | 0.22 | 0.47 | -0.017 | NA |
| chr2 | 306675    | 307167    | AC079779.5   | ENSG00000235779 | 236   | 1    | 0.83 | 0.48 | 0.17   | NA |
| chr2 | 26395416  | 26395620  | FAM59B       | ENSG00000157833 | -442  | 0.24 | 0.16 | 0.48 | 0.077  | NA |
| chr2 | 29033351  | 29034011  | SPDYA        | ENSG00000163806 | -4    | 0.23 | 0.2  | 0.48 | 0.037  | NA |
| chr2 | 73460085  | 73461867  | PRADC1       | ENSG00000135617 | -620  | 0.23 | 0.19 | 0.48 | 0.038  | NA |
| chr2 | 73511157  | 73512086  | FBXO41       | ENSG00000163013 | -62   | 0.23 | 0.2  | 0.48 | 0.033  | NA |
| chr2 | 95537196  | 95537810  | TEKT4        | ENSG00000163060 | 250   | 0.26 | 0.31 | 0.48 | -0.055 | NA |
| chr2 | 162273294 | 162273725 | TBR1         | ENSG00000136535 | 667   | 0.17 | 0.2  | 0.48 | -0.034 | NA |
| chr2 | 178128273 | 178129847 | NFE2L2       | ENSG00000116044 | -765  | 0.2  | 0.22 | 0.48 | -0.018 | NA |
| chr2 | 223161531 | 223161919 | CCDC140      | ENSG00000163081 | -1141 | 0.64 | 0.43 | 0.48 | 0.22   | NA |
| chr2 | 228582485 | 228582821 | SLC19A3      | ENSG00000135917 | 62    | 0.2  | 0.12 | 0.48 | 0.084  | NA |
| chr2 | 26401695  | 26402099  | FAM59B       | ENSG00000157833 | -1688 | 0.15 | 0.19 | 0.49 | -0.04  | NA |

|      |           |           |            |                 |       |      |      |      |        |    |
|------|-----------|-----------|------------|-----------------|-------|------|------|------|--------|----|
| chr2 | 105654249 | 105654771 | MRPS9      | ENSG00000135972 | 69    | 0.25 | 0.35 | 0.49 | -0.094 | NA |
| chr2 | 115918737 | 115920765 | AC066593.1 | ENSG00000235026 | -983  | 0.21 | 0.19 | 0.49 | 0.023  | NA |
| chr2 | 173420200 | 173421443 | PDK1       | ENSG00000152256 | 468   | 0.24 | 0.21 | 0.49 | 0.036  | NA |
| chr2 | 219187653 | 219188251 | PNKD       | ENSG00000127838 | 56    | 0.25 | 0.32 | 0.49 | -0.067 | NA |
| chr2 | 241529962 | 241530345 | CAPN10     | ENSG00000142330 | -274  | 0.91 | 0.86 | 0.49 | 0.049  | NA |
| chr2 | 946881    | 947286    | SNTG2      | ENSG00000172554 | 458   | 0.19 | 0.12 | 0.5  | 0.078  | NA |
| chr2 | 46769471  | 46769676  | ATP6V1E2   | ENSG00000250565 | 123   | 0.22 | 0.07 | 0.5  | 0.15   | NA |
| chr2 | 63849884  | 63850164  | AC016734.2 | ENSG00000228305 | -59   | 0.99 | 0.96 | 0.5  | 0.021  | NA |
| chr2 | 71558723  | 71559525  | ZNF638     | ENSG00000075292 | 235   | 0.19 | 0.16 | 0.5  | 0.031  | NA |
| chr2 | 73612655  | 73613661  | ALMS1      | ENSG00000116127 | 272   | 0.24 | 0.2  | 0.5  | 0.036  | NA |
| chr2 | 75426592  | 75428030  | TACR1      | ENSG00000115353 | -485  | 0.26 | 0.22 | 0.5  | 0.041  | NA |
| chr2 | 91936876  | 91937290  | AC027612.1 | ENSG00000232531 | -71   | 0.37 | 0.35 | 0.5  | 0.026  | NA |
| chr2 | 106809942 | 106811175 | UXS1       | ENSG00000115652 | 197   | 0.21 | 0.19 | 0.5  | 0.024  | NA |
| chr2 | 170220772 | 170221114 | LRP2       | ENSG00000081479 | -1748 | 0.24 | 0.32 | 0.5  | -0.081 | NA |
| chr2 | 200524001 | 200524204 | AC093590.2 | ENSG00000213938 | -172  | 0.27 | 0.14 | 0.5  | 0.13   | NA |
| chr2 | 220416863 | 220417869 | OBSL1      | ENSG00000124006 | -255  | 0.2  | 0.22 | 0.5  | -0.023 | NA |
| chr2 | 945686    | 946774    | AC116614.1 | ENSG00000235688 | -270  | 0.2  | 0.17 | 0.51 | 0.027  | NA |
| chr2 | 25470765  | 25470979  | DNMT3A     | ENSG00000119772 | -104  | 0.9  | 0.94 | 0.51 | -0.041 | NA |
| chr2 | 26624603  | 26625057  | CCDC164    | ENSG00000157856 | 46    | 0.22 | 0.19 | 0.51 | 0.031  | NA |
| chr2 | 27434432  | 27435720  | SLC5A6     | ENSG00000138074 | -456  | 0.22 | 0.19 | 0.51 | 0.024  | NA |
| chr2 | 220309637 | 220309893 | SPEG       | ENSG00000072195 | -2    | 0.79 | 0.62 | 0.51 | 0.16   | NA |
| chr2 | 3286324   | 3286530   | TSSC1      | ENSG00000032389 | 170   | 0.22 | 0.16 | 0.52 | 0.061  | NA |
| chr2 | 44394983  | 44396629  | PPM1B      | ENSG00000138032 | 698   | 0.18 | 0.2  | 0.52 | -0.018 | NA |
| chr2 | 60781019  | 60782284  | BCL11A     | ENSG00000119866 | -949  | 0.24 | 0.2  | 0.52 | 0.035  | NA |
| chr2 | 67624372  | 67624844  | ETAA1      | ENSG00000143971 | 157   | 0.16 | 0.19 | 0.52 | -0.026 | NA |
| chr2 | 74055941  | 74056320  | STAMBP     | ENSG00000124356 | 44    | 0.35 | 0.2  | 0.52 | 0.15   | NA |
| chr2 | 132249335 | 132250975 | MZT2A      | ENSG00000173272 | -611  | 0.29 | 0.33 | 0.52 | -0.033 | NA |
| chr2 | 204192655 | 204193740 | ABI2       | ENSG00000138443 | 255   | 0.18 | 0.21 | 0.52 | -0.027 | NA |
| chr2 | 210288413 | 210288798 | MAP2       | ENSG00000078018 | -177  | 0.18 | 0.24 | 0.52 | -0.06  | NA |
| chr2 | 38152131  | 38152885  | FAM82A1    | ENSG00000115841 | 46    | 0.17 | 0.19 | 0.53 | -0.015 | NA |

|      |           |           |            |                 |      |      |      |      |        |    |
|------|-----------|-----------|------------|-----------------|------|------|------|------|--------|----|
| chr2 | 112917110 | 112917475 | FBLN7      | ENSG00000144152 | -33  | 0.97 | 1    | 0.53 | -0.026 | NA |
| chr2 | 132182327 | 132183101 | GNAQP1     | ENSG00000214077 | -274 | 0.2  | 0.16 | 0.53 | 0.036  | NA |
| chr2 | 150176813 | 150177219 | FAM8A3P    | ENSG00000224337 | -91  | 0.64 | 0.61 | 0.53 | 0.029  | NA |
| chr2 | 27193273  | 27193864  | MAPRE3     | ENSG00000084764 | 88   | 0.15 | 0.19 | 0.54 | -0.039 | NA |
| chr2 | 30669988  | 30670720  | LCLAT1     | ENSG00000172954 | 262  | 0.21 | 0.18 | 0.54 | 0.025  | NA |
| chr2 | 37383901  | 37384402  | EIF2AK2    | ENSG00000055332 | 24   | 0.21 | 0.24 | 0.54 | -0.031 | NA |
| chr2 | 43864322  | 43864956  | PLEKHH2    | ENSG00000152527 | 227  | 0.23 | 0.26 | 0.54 | -0.026 | NA |
| chr2 | 46843650  | 46844332  | PIGF       | ENSG00000151665 | 178  | 0.16 | 0.19 | 0.54 | -0.027 | NA |
| chr2 | 87088816  | 87089037  | CD8B       | ENSG00000172116 | 79   | 0.5  | 0.23 | 0.54 | 0.27   | NA |
| chr2 | 96657486  | 96658496  | AC073995.2 | ENSG00000174501 | -450 | 0.24 | 0.14 | 0.54 | 0.1    | NA |
| chr2 | 107502353 | 107504216 | ST6GAL2    | ENSG00000144057 | -815 | 0.19 | 0.17 | 0.54 | 0.02   | NA |
| chr2 | 145089453 | 145090397 | GTDC1      | ENSG00000121964 | 158  | 0.22 | 0.2  | 0.54 | 0.021  | NA |
| chr2 | 178077185 | 178078215 | HNRNPA3    | ENSG00000170144 | 409  | 0.25 | 0.27 | 0.54 | -0.025 | NA |
| chr2 | 191884943 | 191885417 | STAT1      | ENSG00000115415 | -134 | 0.2  | 0.16 | 0.54 | 0.043  | NA |
| chr2 | 203879249 | 203879891 | WDR12      | ENSG00000138442 | -49  | 0.22 | 0.17 | 0.54 | 0.045  | NA |
| chr2 | 70520468  | 70520999  | SNRPG      | ENSG00000143977 | -163 | 0.27 | 0.24 | 0.55 | 0.027  | NA |
| chr2 | 71693164  | 71694127  | DYSF       | ENSG00000135636 | -187 | 0.24 | 0.21 | 0.55 | 0.025  | NA |
| chr2 | 98703354  | 98703889  | VWA3B      | ENSG00000168658 | 42   | 0.23 | 0.19 | 0.55 | 0.039  | NA |
| chr2 | 130691702 | 130692102 | AC079776.2 | ENSG00000214100 | -12  | 0.3  | 0.23 | 0.55 | 0.073  | NA |
| chr2 | 172543901 | 172544690 | DYNC1I2    | ENSG00000077380 | 376  | 0.21 | 0.27 | 0.55 | -0.061 | NA |
| chr2 | 190445459 | 190445983 | SLC40A1    | ENSG00000138449 | -254 | 0.23 | 0.2  | 0.55 | 0.029  | NA |
| chr2 | 200335497 | 200336413 | SATB2      | ENSG00000119042 | 34   | 0.29 | 0.27 | 0.55 | 0.024  | NA |
| chr2 | 219748276 | 219748805 | WNT10A     | ENSG00000135925 | -32  | 0.24 | 0.21 | 0.55 | 0.029  | NA |
| chr2 | 32581746  | 32583265  | BIRC6      | ENSG00000115760 | 409  | 0.29 | 0.27 | 0.56 | 0.017  | NA |
| chr2 | 33952422  | 33952684  | MYADML     | ENSG00000239649 | 78   | 0.98 | 0.93 | 0.56 | 0.049  | NA |
| chr2 | 74681969  | 74682201  | INO80B     | ENSG00000115274 | -65  | 0.26 | 0.17 | 0.56 | 0.098  | NA |
| chr2 | 91873047  | 91874525  | AC027612.2 | ENSG00000184303 | 123  | 0.51 | 0.54 | 0.56 | -0.032 | NA |
| chr2 | 102803672 | 102804556 | IL1RL2     | ENSG00000115598 | 340  | 0.41 | 0.35 | 0.56 | 0.057  | NA |
| chr2 | 121492857 | 121495234 | GLI2       | ENSG00000074047 | 846  | 0.22 | 0.23 | 0.56 | -0.014 | NA |
| chr2 | 128051347 | 128051857 | ERCC3      | ENSG00000163161 | 68   | 0.16 | 0.21 | 0.56 | -0.048 | NA |



|      |           |           |             |                 |      |      |      |      |        |    |
|------|-----------|-----------|-------------|-----------------|------|------|------|------|--------|----|
| chr2 | 211341181 | 211341536 | LANCL1      | ENSG00000115365 | 71   | 0.17 | 0.14 | 0.56 | 0.032  | NA |
| chr2 | 241937716 | 241938468 | SNED1       | ENSG00000162804 | -163 | 0.24 | 0.18 | 0.56 | 0.066  | NA |
| chr2 | 70780049  | 70781577  | TGFA        | ENSG00000163235 | -191 | 0.22 | 0.24 | 0.57 | -0.024 | NA |
| chr2 | 74425444  | 74426423  | MTHFD2      | ENSG00000065911 | 244  | 0.19 | 0.17 | 0.57 | 0.026  | NA |
| chr2 | 166809970 | 166810826 | TTC21B      | ENSG00000123607 | -143 | 0.17 | 0.2  | 0.57 | -0.033 | NA |
| chr2 | 219757458 | 219758001 | WNT10A      | ENSG00000135925 | -214 | 0.2  | 0.18 | 0.57 | 0.025  | NA |
| chr2 | 242625961 | 242626720 | DTYMK       | ENSG00000168393 | -213 | 0.19 | 0.21 | 0.57 | -0.021 | NA |
| chr2 | 1266419   | 1266661   | SNTG2       | ENSG00000172554 | -76  | 0.96 | 1    | 0.58 | -0.04  | NA |
| chr2 | 10559716  | 10560294  | HPCAL1      | ENSG00000115756 | -142 | 0.97 | 0.99 | 0.58 | -0.014 | NA |
| chr2 | 65662914  | 65663879  | AC074391.1  | ENSG00000204929 | -468 | 0.19 | 0.18 | 0.58 | 0.018  | NA |
| chr2 | 74211214  | 74212314  | AC073046.25 | ENSG00000235499 | -495 | 0.25 | 0.22 | 0.58 | 0.031  | NA |
| chr2 | 97481356  | 97483276  | CNNM3       | ENSG00000168763 | 334  | 0.17 | 0.16 | 0.58 | 0.013  | NA |
| chr2 | 170218314 | 170219203 | LRP2        | ENSG00000081479 | 286  | 0.27 | 0.24 | 0.58 | 0.023  | NA |
| chr2 | 178937595 | 178937907 | PDE11A      | ENSG00000128655 | -269 | 0.27 | 0.33 | 0.58 | -0.067 | NA |
| chr2 | 228336752 | 228337875 | AGFG1       | ENSG00000173744 | 445  | 0.23 | 0.21 | 0.58 | 0.017  | NA |
| chr2 | 25194140  | 25195214  | AC013267.2  | ENSG00000224165 | 418  | 0.25 | 0.23 | 0.59 | 0.021  | NA |
| chr2 | 27603350  | 27604064  | ZNF513      | ENSG00000163795 | -115 | 0.18 | 0.22 | 0.59 | -0.037 | NA |
| chr2 | 95401380  | 95401636  | AC073464.4  | ENSG00000227265 | 81   | 0.37 | 0.28 | 0.59 | 0.084  | NA |
| chr2 | 209130748 | 209131065 | IDH1        | ENSG00000138413 | -108 | 0.25 | 0.2  | 0.59 | 0.05   | NA |
| chr2 | 133173532 | 133174369 | GPR39       | ENSG00000183840 | -197 | 0.26 | 0.24 | 0.6  | 0.024  | NA |
| chr2 | 20646428  | 20647988  | RHOB        | ENSG00000143878 | 373  | 0.2  | 0.18 | 0.61 | 0.014  | NA |
| chr2 | 110551798 | 110552705 | RGPD5       | ENSG00000015568 | 400  | 0.51 | 0.4  | 0.61 | 0.11   | NA |
| chr2 | 162275161 | 162275596 | TBR1        | ENSG00000136535 | -343 | 0.18 | 0.14 | 0.61 | 0.042  | NA |
| chr2 | 175112926 | 175113743 | OLA1        | ENSG00000138430 | -246 | 0.26 | 0.22 | 0.61 | 0.04   | NA |
| chr2 | 181844791 | 181845514 | AC104076.3  | ENSG00000236153 | -335 | 0.17 | 0.15 | 0.61 | 0.028  | NA |
| chr2 | 12856625  | 12859019  | TRIB2       | ENSG00000071575 | 807  | 0.25 | 0.23 | 0.62 | 0.016  | NA |
| chr2 | 24298969  | 24299512  | AC008073.5  | ENSG00000115128 | 3    | 0.23 | 0.2  | 0.62 | 0.029  | NA |
| chr2 | 27994470  | 27994944  | MRPL33      | ENSG00000243147 | 123  | 0.19 | 0.16 | 0.62 | 0.024  | NA |
| chr2 | 37898142  | 37899830  | CDC42EP3    | ENSG00000163171 | 348  | 0.21 | 0.22 | 0.62 | -0.016 | NA |
| chr2 | 75787717  | 75788312  | FAM176A     | ENSG00000115363 | 25   | 0.28 | 0.25 | 0.62 | 0.038  | NA |

|      |           |           |            |                 |       |      |      |      |        |    |
|------|-----------|-----------|------------|-----------------|-------|------|------|------|--------|----|
| chr2 | 128180294 | 128181381 | PROC       | ENSG00000115718 | -27   | 0.3  | 0.27 | 0.62 | 0.022  | NA |
| chr2 | 220432788 | 220433041 | INHA       | ENSG00000123999 | -970  | 0.94 | 0.91 | 0.62 | 0.027  | NA |
| chr2 | 238969080 | 238969919 | SCLY       | ENSG00000132330 | -31   | 0.22 | 0.21 | 0.62 | 0.017  | NA |
| chr2 | 17720155  | 17720417  | VSNL1      | ENSG00000163032 | -107  | 0.2  | 0.18 | 0.63 | 0.023  | NA |
| chr2 | 20189588  | 20190229  | WDR35      | ENSG00000118965 | -99   | 0.3  | 0.35 | 0.63 | -0.042 | NA |
| chr2 | 107103833 | 107104053 | AC108868.4 | ENSG00000254126 | 60    | 0.15 | 0.2  | 0.63 | -0.041 | NA |
| chr2 | 114195165 | 114195563 | CBWD2      | ENSG00000136682 | 96    | 0.21 | 0.08 | 0.63 | 0.13   | NA |
| chr2 | 162270888 | 162271413 | TBR1       | ENSG00000136535 | -1455 | 0.25 | 0.21 | 0.63 | 0.038  | NA |
| chr2 | 170335881 | 170336456 | BBS5       | ENSG00000163093 | 178   | 0.27 | 0.31 | 0.63 | -0.041 | NA |
| chr2 | 174219533 | 174220368 | CDCA7      | ENSG00000144354 | 402   | 0.14 | 0.11 | 0.63 | 0.028  | NA |
| chr2 | 225449256 | 225450488 | CUL3       | ENSG00000036257 | 193   | 0.26 | 0.24 | 0.63 | 0.023  | NA |
| chr2 | 241507463 | 241507669 | RNPEPL1    | ENSG00000142327 | -538  | 0.16 | 0.19 | 0.63 | -0.036 | NA |
| chr2 | 30453566  | 30455655  | LBH        | ENSG00000213626 | 213   | 0.22 | 0.2  | 0.64 | 0.017  | NA |
| chr2 | 54482924  | 54483434  | TSPYL6     | ENSG00000178021 | 230   | 0.97 | 0.99 | 0.64 | -0.021 | NA |
| chr2 | 113012108 | 113012784 | ZC3H8      | ENSG00000144161 | 154   | 0.21 | 0.25 | 0.64 | -0.039 | NA |
| chr2 | 119606038 | 119606313 | EN1        | ENSG00000163064 | -921  | 0.19 | 0.23 | 0.64 | -0.048 | NA |
| chr2 | 198669079 | 198670154 | PLCL1      | ENSG00000115896 | 190   | 0.19 | 0.18 | 0.64 | 0.016  | NA |
| chr2 | 11809606  | 11810433  | NTSR2      | ENSG00000169006 | 271   | 0.35 | 0.33 | 0.65 | 0.021  | NA |
| chr2 | 32264802  | 32265019  | DPY30      | ENSG00000162961 | -87   | 0.17 | 0.14 | 0.65 | 0.033  | NA |
| chr2 | 171676552 | 171676980 | GAD1       | ENSG00000128683 | -1462 | 0.27 | 0.32 | 0.65 | -0.052 | NA |
| chr2 | 187713846 | 187714069 | ZSWIM2     | ENSG00000163012 | -60   | 0.15 | 0.13 | 0.65 | 0.024  | NA |
| chr2 | 232789995 | 232791286 | NPPC       | ENSG00000163273 | 398   | 0.22 | 0.24 | 0.65 | -0.017 | NA |
| chr2 | 235404502 | 235406541 | ARL4C      | ENSG00000188042 | -277  | 0.29 | 0.28 | 0.65 | 0.015  | NA |
| chr2 | 25565091  | 25565604  | DNMT3A     | ENSG00000119772 | 11    | 0.17 | 0.19 | 0.66 | -0.026 | NA |
| chr2 | 27255600  | 27256121  | TMEM214    | ENSG00000119777 | 82    | 0.24 | 0.2  | 0.66 | 0.034  | NA |
| chr2 | 71221520  | 71222299  | AC007040.6 | ENSG00000228384 | 269   | 0.17 | 0.16 | 0.66 | 0.016  | NA |
| chr2 | 162016883 | 162017331 | TANK       | ENSG00000136560 | 190   | 0.2  | 0.24 | 0.66 | -0.039 | NA |
| chr2 | 219646432 | 219647181 | CYP27A1    | ENSG00000135929 | 334   | 0.19 | 0.16 | 0.66 | 0.03   | NA |
| chr2 | 23607729  | 23610124  | KLHL29     | ENSG00000119771 | 838   | 0.19 | 0.2  | 0.67 | -0.011 | NA |
| chr2 | 27601341  | 27601676  | ZNF513     | ENSG00000163795 | 352   | 0.7  | 0.74 | 0.67 | -0.04  | NA |

|      |           |           |            |                 |       |      |      |      |        |    |
|------|-----------|-----------|------------|-----------------|-------|------|------|------|--------|----|
| chr2 | 47167858  | 47168978  | TTC7A      | ENSG00000068724 | 105   | 0.2  | 0.18 | 0.67 | 0.018  | NA |
| chr2 | 71357187  | 71357952  | MCEE       | ENSG00000124370 | -225  | 0.2  | 0.17 | 0.67 | 0.03   | NA |
| chr2 | 73441313  | 73441817  | SMYD5      | ENSG00000135632 | 215   | 0.18 | 0.16 | 0.67 | 0.019  | NA |
| chr2 | 204103464 | 204104172 | CYP20A1    | ENSG00000119004 | 155   | 0.22 | 0.19 | 0.67 | 0.023  | NA |
| chr2 | 27008760  | 27009465  | CENPA      | ENSG00000115163 | 247   | 0.16 | 0.18 | 0.68 | -0.02  | NA |
| chr2 | 64067892  | 64068906  | UGP2       | ENSG00000169764 | 325   | 0.23 | 0.25 | 0.68 | -0.02  | NA |
| chr2 | 179344852 | 179345483 | PLEKHA3    | ENSG00000116095 | -28   | 0.21 | 0.23 | 0.68 | -0.022 | NA |
| chr2 | 197791390 | 197791599 | PGAP1      | ENSG00000197121 | -40   | 0.22 | 0.27 | 0.68 | -0.054 | NA |
| chr2 | 224808923 | 224810219 | WDFY1      | ENSG00000085449 | 481   | 0.21 | 0.2  | 0.68 | 0.012  | NA |
| chr2 | 242211289 | 242212308 | HDLBP      | ENSG00000115677 | -412  | 0.19 | 0.17 | 0.68 | 0.016  | NA |
| chr2 | 74405352  | 74406164  | MOBKL1B    | ENSG00000114978 | -317  | 0.26 | 0.28 | 0.69 | -0.021 | NA |
| chr2 | 179315214 | 179316573 | PRKRA      | ENSG00000180228 | -437  | 0.23 | 0.25 | 0.69 | -0.015 | NA |
| chr2 | 241391876 | 241393598 | GPC1       | ENSG00000063660 | 509   | 0.21 | 0.19 | 0.69 | 0.012  | NA |
| chr2 | 24345990  | 24346793  | PFN4       | ENSG00000176732 | -202  | 0.14 | 0.15 | 0.7  | -0.011 | NA |
| chr2 | 97534100  | 97536270  | SEMA4C     | ENSG00000168758 | -860  | 0.24 | 0.23 | 0.7  | 0.013  | NA |
| chr2 | 177134138 | 177134531 | MTX2       | ENSG00000128654 | 187   | 0.26 | 0.21 | 0.7  | 0.044  | NA |
| chr2 | 209119881 | 209120309 | AC016697.3 | ENSG00000231908 | 124   | 0.24 | 0.21 | 0.7  | 0.032  | NA |
| chr2 | 220173870 | 220174283 | PTPRN      | ENSG00000054356 | -181  | 0.16 | 0.12 | 0.7  | 0.04   | NA |
| chr2 | 228028679 | 228029733 | COL4A4     | ENSG00000081052 | -377  | 0.2  | 0.19 | 0.7  | 0.012  | NA |
| chr2 | 26785114  | 26785687  | C2orf70    | ENSG00000173557 | -50   | 0.23 | 0.21 | 0.71 | 0.026  | NA |
| chr2 | 27294139  | 27294915  | OST4       | ENSG00000228474 | -10   | 0.18 | 0.21 | 0.71 | -0.029 | NA |
| chr2 | 145273456 | 145275378 | ZEB2       | ENSG00000169554 | -89   | 0.22 | 0.23 | 0.71 | -0.012 | NA |
| chr2 | 176956504 | 176956707 | HOXD13     | ENSG00000128714 | -1014 | 0.26 | 0.23 | 0.71 | 0.03   | NA |
| chr2 | 179278327 | 179278669 | AC009948.5 | ENSG00000223960 | -168  | 0.22 | 0.24 | 0.71 | -0.023 | NA |
| chr2 | 184125343 | 184125583 | LIN28AP1   | ENSG00000213120 | 93    | 0.99 | 0.98 | 0.71 | 0.011  | NA |
| chr2 | 230932468 | 230933550 | SLC16A14   | ENSG00000163053 | -4    | 0.2  | 0.22 | 0.71 | -0.012 | NA |
| chr2 | 20865289  | 20867589  | GDF7       | ENSG00000143869 | 15    | 0.23 | 0.24 | 0.72 | -0.011 | NA |
| chr2 | 48667559  | 48668355  | KLRAQ1     | ENSG00000162869 | 220   | 0.2  | 0.26 | 0.72 | -0.059 | NA |
| chr2 | 97166208  | 97166660  | NEURL3     | ENSG00000163121 | 227   | 0.84 | 0.78 | 0.72 | 0.054  | NA |
| chr2 | 130795340 | 130795714 | AC018865.8 | ENSG00000180178 | -741  | 0.85 | 1    | 0.72 | -0.15  | NA |

|      |           |           |            |                 |       |      |      |      |         |    |
|------|-----------|-----------|------------|-----------------|-------|------|------|------|---------|----|
| chr2 | 217559039 | 217559484 | AC007563.5 | ENSG00000236886 | 74    | 0.14 | 0.13 | 0.72 | 0.016   | NA |
| chr2 | 112641337 | 112641906 | ANAPC1     | ENSG00000153107 | 137   | 0.19 | 0.21 | 0.73 | -0.022  | NA |
| chr2 | 176971706 | 176972305 | HOXD11     | ENSG00000128713 | -9    | 0.22 | 0.2  | 0.73 | 0.022   | NA |
| chr2 | 196521555 | 196522950 | SLC39A10   | ENSG00000196950 | 617   | 0.2  | 0.21 | 0.73 | -0.01   | NA |
| chr2 | 38301276  | 38304518  | CYP1B1-AS1 | ENSG00000232973 | 106   | 0.25 | 0.26 | 0.74 | -0.0077 | NA |
| chr2 | 66660452  | 66660794  | MEIS1      | ENSG00000143995 | 39    | 0.44 | 0.29 | 0.74 | 0.16    | NA |
| chr2 | 74374838  | 74375257  | BOLA3      | ENSG00000163170 | -15   | 0.24 | 0.19 | 0.74 | 0.051   | NA |
| chr2 | 122512987 | 122513526 | TSN        | ENSG00000211460 | 147   | 0.24 | 0.28 | 0.74 | -0.041  | NA |
| chr2 | 180725717 | 180726465 | ZNF385B    | ENSG00000144331 | 141   | 0.23 | 0.25 | 0.74 | -0.02   | NA |
| chr2 | 186603392 | 186603910 | AC007966.1 | ENSG00000226747 | -203  | 0.53 | 0.49 | 0.74 | 0.041   | NA |
| chr2 | 211089413 | 211090176 | ACADL      | ENSG00000115361 | -221  | 0.26 | 0.28 | 0.74 | -0.015  | NA |
| chr2 | 55509233  | 55509720  | AC012358.1 | ENSG00000162997 | 16    | 0.28 | 0.2  | 0.75 | 0.078   | NA |
| chr2 | 86115590  | 86116327  | ST3GAL5    | ENSG00000115525 | 42    | 0.21 | 0.19 | 0.75 | 0.019   | NA |
| chr2 | 99061174  | 99061848  | INPP4A     | ENSG00000040933 | 194   | 0.17 | 0.19 | 0.75 | -0.018  | NA |
| chr2 | 131862756 | 131863444 | PLEKHB2    | ENSG00000115762 | 225   | 0.25 | 0.28 | 0.75 | -0.03   | NA |
| chr2 | 176866693 | 176867188 | KIAA1715   | ENSG00000144320 | 51    | 0.3  | 0.14 | 0.75 | 0.16    | NA |
| chr2 | 182547873 | 182549177 | AC013733.3 | ENSG00000234595 | 685   | 0.32 | 0.34 | 0.75 | -0.016  | NA |
| chr2 | 218843460 | 218843742 | TNS1       | ENSG00000079308 | 56    | 0.32 | 0.39 | 0.75 | -0.076  | NA |
| chr2 | 220407698 | 220409048 | CHPF       | ENSG00000123989 | -554  | 0.21 | 0.22 | 0.75 | -0.012  | NA |
| chr2 | 241499582 | 241500785 | DUSP28     | ENSG00000188542 | 464   | 0.21 | 0.23 | 0.75 | -0.014  | NA |
| chr2 | 16079801  | 16083032  | MYCN       | ENSG00000134323 | 730   | 0.22 | 0.23 | 0.76 | -0.0083 | NA |
| chr2 | 120281661 | 120282211 | SCTR       | ENSG00000080293 | 134   | 0.22 | 0.23 | 0.76 | -0.014  | NA |
| chr2 | 223162946 | 223163912 | PAX3       | ENSG00000135903 | 36    | 0.22 | 0.23 | 0.76 | -0.013  | NA |
| chr2 | 36584500  | 36584982  | CRIM1      | ENSG00000150938 | 1127  | 0.24 | 0.12 | 0.77 | 0.12    | NA |
| chr2 | 39663897  | 39664667  | MAP4K3     | ENSG00000011566 | -76   | 0.25 | 0.24 | 0.77 | 0.016   | NA |
| chr2 | 119605200 | 119605620 | EN1        | ENSG00000163064 | -156  | 0.26 | 0.32 | 0.77 | -0.055  | NA |
| chr2 | 131792237 | 131793189 | ARHGEF4    | ENSG00000136002 | 212   | 0.25 | 0.23 | 0.77 | 0.014   | NA |
| chr2 | 170440796 | 170441341 | PPIG       | ENSG00000138398 | 218   | 0.2  | 0.24 | 0.77 | -0.042  | NA |
| chr2 | 208393955 | 208395024 | CREB1      | ENSG00000118260 | 28    | 0.22 | 0.21 | 0.77 | 0.014   | NA |
| chr2 | 20423088  | 20425767  | SDC1       | ENSG00000115884 | -1278 | 0.21 | 0.21 | 0.78 | 0.006   | NA |

|      |           |           |              |                 |      |      |      |      |         |    |
|------|-----------|-----------|--------------|-----------------|------|------|------|------|---------|----|
| chr2 | 54557630  | 54558039  | C2orf73      | ENSG00000177994 | -205 | 0.15 | 0.13 | 0.78 | 0.014   | NA |
| chr2 | 120005514 | 120005756 | STEAP3       | ENSG00000115107 | -6   | 0.92 | 0.85 | 0.78 | 0.065   | NA |
| chr2 | 145281736 | 145282269 | ZEB2         | ENSG00000169554 | 145  | 0.5  | 0.3  | 0.78 | 0.2     | NA |
| chr2 | 171671598 | 171671804 | GAD1         | ENSG00000128683 | -923 | 0.27 | 0.29 | 0.78 | -0.023  | NA |
| chr2 | 232328445 | 232330149 | NCL          | ENSG00000115053 | -406 | 0.26 | 0.25 | 0.78 | 0.01    | NA |
| chr2 | 238535561 | 238536840 | LRRFIP1      | ENSG00000124831 | -19  | 0.21 | 0.2  | 0.78 | 0.011   | NA |
| chr2 | 121009918 | 121011228 | RALB         | ENSG00000144118 | 239  | 0.26 | 0.28 | 0.79 | -0.018  | NA |
| chr2 | 151341742 | 151343191 | RND3         | ENSG00000115963 | -570 | 0.19 | 0.22 | 0.79 | -0.025  | NA |
| chr2 | 182321761 | 182323029 | ITGA4        | ENSG00000115232 | 466  | 0.29 | 0.27 | 0.79 | 0.014   | NA |
| chr2 | 219232375 | 219232892 | AC021016.6   | ENSG00000225062 | -75  | 0.25 | 0.26 | 0.79 | -0.014  | NA |
| chr2 | 234160100 | 234160735 | ATG16L1      | ENSG00000085978 | 200  | 0.25 | 0.28 | 0.79 | -0.023  | NA |
| chr2 | 3461654   | 3461863   | TTC15        | ENSG00000171853 | -326 | 0.96 | 0.92 | 0.8  | 0.041   | NA |
| chr2 | 70056599  | 70057583  | GMCL1        | ENSG00000087338 | 317  | 0.2  | 0.18 | 0.8  | 0.015   | NA |
| chr2 | 73964318  | 73964677  | TPRKB        | ENSG00000144034 | -35  | 0.21 | 0.23 | 0.8  | -0.023  | NA |
| chr2 | 128615479 | 128616004 | POLR2D       | ENSG00000144231 | -218 | 0.18 | 0.2  | 0.8  | -0.023  | NA |
| chr2 | 133175160 | 133175444 | GPR39        | ENSG00000183840 | 1155 | 0.94 | 1    | 0.8  | -0.063  | NA |
| chr2 | 170550783 | 170551371 | C2orf77      | ENSG00000154479 | -217 | 0.15 | 0.16 | 0.8  | -0.015  | NA |
| chr2 | 9695522   | 9696606   | ADAM17       | ENSG00000151694 | -161 | 0.21 | 0.2  | 0.81 | 0.011   | NA |
| chr2 | 10262173  | 10263481  | RRM2         | ENSG00000171848 | 372  | 0.18 | 0.17 | 0.81 | 0.0082  | NA |
| chr2 | 70141359  | 70142939  | MXD1         | ENSG00000059728 | -54  | 0.21 | 0.2  | 0.81 | 0.0098  | NA |
| chr2 | 232063173 | 232063616 | ARMC9        | ENSG00000135931 | 134  | 0.26 | 0.22 | 0.81 | 0.042   | NA |
| chr2 | 234112923 | 234113321 | INPP5D       | ENSG00000168918 | -166 | 0.96 | 0.94 | 0.81 | 0.013   | NA |
| chr2 | 3522270   | 3523617   | AC142528.1   | ENSG00000235078 | -103 | 0.2  | 0.21 | 0.82 | -0.0089 | NA |
| chr2 | 26987030  | 26987500  | C2orf18      | ENSG00000213699 | 113  | 0.22 | 0.24 | 0.82 | -0.021  | NA |
| chr2 | 32288366  | 32289466  | SPAST        | ENSG00000021574 | 236  | 0.26 | 0.25 | 0.82 | 0.0094  | NA |
| chr2 | 48757211  | 48757785  | STON1        | ENSG00000243244 | 188  | 0.26 | 0.24 | 0.82 | 0.025   | NA |
| chr2 | 52856694  | 52857124  | FTH1P6       | ENSG00000233083 | 28   | 0.99 | 0.98 | 0.82 | 0.0076  | NA |
| chr2 | 74347273  | 74347777  | RP11-287D1.1 | ENSG00000257800 | -282 | 0.18 | 0.19 | 0.82 | -0.01   | NA |
| chr2 | 95824802  | 95825721  | ZNF514       | ENSG00000144026 | -179 | 0.21 | 0.23 | 0.82 | -0.023  | NA |
| chr2 | 99771109  | 99771637  | TSGA10       | ENSG00000135951 | -49  | 0.3  | 0.32 | 0.82 | -0.02   | NA |

|      |           |           |               |                 |       |      |      |      |        |    |
|------|-----------|-----------|---------------|-----------------|-------|------|------|------|--------|----|
| chr2 | 99797348  | 99797623  | MITD1         | ENSG00000158411 | -95   | 0.25 | 0.28 | 0.82 | -0.037 | NA |
| chr2 | 160142607 | 160143567 | WDSUB1        | ENSG00000196151 | -24   | 0.21 | 0.19 | 0.82 | 0.019  | NA |
| chr2 | 111140611 | 111142283 | AC108938.2    | ENSG00000226065 | 758   | 0.8  | 0.67 | 0.83 | 0.13   | NA |
| chr2 | 134877407 | 134879168 | MGAT5         | ENSG00000152127 | 733   | 0.23 | 0.24 | 0.83 | -0.013 | NA |
| chr2 | 45510     | 46559     | FAM110C       | ENSG00000184731 | 351   | 0.21 | 0.2  | 0.84 | 0.0069 | NA |
| chr2 | 24398413  | 24398669  | C2orf84       | ENSG00000186453 | 187   | 0.89 | 0.92 | 0.84 | -0.021 | NA |
| chr2 | 61292868  | 61293585  | KIAA1841      | ENSG00000162929 | 220   | 0.19 | 0.17 | 0.84 | 0.014  | NA |
| chr2 | 74729399  | 74731166  | RP11-523H20.2 | ENSG00000257702 | 560   | 0.44 | 0.43 | 0.84 | 0.0084 | NA |
| chr2 | 87034658  | 87034889  | CD8A          | ENSG00000153563 | 746   | 0.23 | 0.12 | 0.84 | 0.1    | NA |
| chr2 | 171785474 | 171786399 | GORASP2       | ENSG00000115806 | 229   | 0.3  | 0.29 | 0.84 | 0.015  | NA |
| chr2 | 187558794 | 187559012 | FAM171B       | ENSG00000144369 | 114   | 0.2  | 0.16 | 0.84 | 0.041  | NA |
| chr2 | 198299244 | 198299972 | SF3B1         | ENSG00000115524 | 132   | 0.15 | 0.25 | 0.84 | -0.098 | NA |
| chr2 | 201936024 | 201936376 | NDUFB3        | ENSG00000119013 | 44    | 0.18 | 0.5  | 0.84 | -0.32  | NA |
| chr2 | 8977373   | 8977789   | KIDINS220     | ENSG00000134313 | 145   | 0.23 | 0.22 | 0.85 | 0.0099 | NA |
| chr2 | 46770149  | 46770370  | RHOQ          | ENSG00000119729 | -29   | 0.25 | 0.29 | 0.85 | -0.039 | NA |
| chr2 | 60779445  | 60779745  | BCL11A        | ENSG00000119866 | 943   | 0.21 | 0.25 | 0.85 | -0.04  | NA |
| chr2 | 131099469 | 131100863 | CCDC115       | ENSG00000136710 | -458  | 0.21 | 0.22 | 0.85 | -0.013 | NA |
| chr2 | 171627225 | 171628062 | AC007405.4    | ENSG00000234350 | -367  | 0.21 | 0.19 | 0.85 | 0.011  | NA |
| chr2 | 176045969 | 176046504 | ATP5G3        | ENSG00000154518 | 155   | 0.23 | 0.25 | 0.85 | -0.019 | NA |
| chr2 | 227700313 | 227701115 | RHBDD1        | ENSG00000144468 | 62    | 0.2  | 0.21 | 0.85 | -0.01  | NA |
| chr2 | 241374410 | 241376320 | GPC1          | ENSG00000063660 | 277   | 0.21 | 0.2  | 0.85 | 0.007  | NA |
| chr2 | 128408957 | 128409355 | LIMS2         | ENSG00000072163 | -1043 | 0.88 | 1    | 0.86 | -0.12  | NA |
| chr2 | 233740668 | 233741879 | C2orf82       | ENSG00000182600 | 42    | 0.2  | 0.19 | 0.86 | 0.0095 | NA |
| chr2 | 86946401  | 86948451  | RMND5A        | ENSG00000153561 | 130   | 0.26 | 0.25 | 0.87 | 0.015  | NA |
| chr2 | 88354840  | 88355574  | KRCC1         | ENSG00000172086 | 41    | 0.25 | 0.24 | 0.87 | 0.012  | NA |
| chr2 | 112656186 | 112656918 | MERTK         | ENSG00000153208 | 361   | 0.21 | 0.2  | 0.87 | 0.011  | NA |
| chr2 | 120770397 | 120771151 | EPB41L5       | ENSG00000115109 | 193   | 0.2  | 0.22 | 0.87 | -0.014 | NA |
| chr2 | 172750718 | 172751020 | SLC25A12      | ENSG00000115840 | -136  | 0.24 | 0.29 | 0.87 | -0.045 | NA |
| chr2 | 197035589 | 197036383 | STK17B        | ENSG00000081320 | -262  | 0.16 | 0.17 | 0.87 | -0.01  | NA |
| chr2 | 220109984 | 220110488 | GLB1L         | ENSG00000163521 | -108  | 0.21 | 0.19 | 0.87 | 0.012  | NA |

|      |           |           |            |                 |       |      |      |      |         |    |
|------|-----------|-----------|------------|-----------------|-------|------|------|------|---------|----|
| chr2 | 233386614 | 233389161 | PRSS56     | ENSG00000237412 | -683  | 0.26 | 0.25 | 0.87 | 0.005   | NA |
| chr2 | 69240083  | 69241004  | ANTXR1     | ENSG00000169604 | 233   | 0.25 | 0.28 | 0.88 | -0.027  | NA |
| chr2 | 96810443  | 96811454  | DUSP2      | ENSG00000158050 | 231   | 0.21 | 0.22 | 0.88 | -0.014  | NA |
| chr2 | 113239249 | 113240584 | TTL        | ENSG00000114999 | 185   | 0.18 | 0.17 | 0.88 | 0.0058  | NA |
| chr2 | 172951289 | 172952159 | DLX1       | ENSG00000144355 | -371  | 0.25 | 0.24 | 0.88 | 0.01    | NA |
| chr2 | 174828330 | 174830617 | SP3        | ENSG00000172845 | -526  | 0.23 | 0.23 | 0.88 | 0.0048  | NA |
| chr2 | 220306855 | 220307096 | SPEG       | ENSG00000072195 | 202   | 0.24 | 0.22 | 0.88 | 0.014   | NA |
| chr2 | 241075403 | 241075916 | MYEOV2     | ENSG00000172428 | -66   | 0.16 | 0.16 | 0.88 | -0.0067 | NA |
| chr2 | 7057530   | 7058433   | RNF144A    | ENSG00000151692 | 395   | 0.21 | 0.2  | 0.89 | 0.016   | NA |
| chr2 | 27272846  | 27273400  | AC013472.6 | ENSG00000231636 | 9     | 0.11 | 0.11 | 0.89 | 0.0046  | NA |
| chr2 | 29092728  | 29093439  | TRMT61B    | ENSG00000171103 | 78    | 0.4  | 0.33 | 0.89 | 0.07    | NA |
| chr2 | 70417746  | 70418310  | C2orf42    | ENSG00000115998 | -197  | 0.18 | 0.19 | 0.89 | -0.016  | NA |
| chr2 | 74006849  | 74007274  | DUSP11     | ENSG00000144048 | -56   | 0.17 | 0.14 | 0.89 | 0.025   | NA |
| chr2 | 106681982 | 106682403 | C2orf40    | ENSG00000119147 | 80    | 0.27 | 0.29 | 0.89 | -0.013  | NA |
| chr2 | 130955619 | 130956274 | TUBA3E     | ENSG00000152086 | 88    | 0.97 | 0.97 | 0.89 | 0.0085  | NA |
| chr2 | 164592917 | 164593511 | FIGN       | ENSG00000182263 | -692  | 0.24 | 0.22 | 0.89 | 0.017   | NA |
| chr2 | 204399490 | 204400179 | RAPH1      | ENSG00000173166 | 151   | 0.22 | 0.2  | 0.89 | 0.013   | NA |
| chr2 | 26204554  | 26205649  | KIF3C      | ENSG00000084731 | 252   | 0.17 | 0.17 | 0.9  | -0.0075 | NA |
| chr2 | 30142831  | 30144624  | ALK        | ENSG00000171094 | -202  | 0.18 | 0.18 | 0.9  | 0.0055  | NA |
| chr2 | 54197776  | 54198490  | PSME4      | ENSG00000068878 | -218  | 0.23 | 0.23 | 0.9  | 0.0079  | NA |
| chr2 | 128433010 | 128433490 | LIMS2      | ENSG00000072163 | 129   | 0.23 | 0.21 | 0.9  | 0.012   | NA |
| chr2 | 242156851 | 242157835 | ANO7       | ENSG00000146205 | 313   | 0.2  | 0.2  | 0.9  | -0.0067 | NA |
| chr2 | 242794853 | 242795083 | PDCD1      | ENSG00000188389 | 70    | 0.92 | 0.93 | 0.9  | -0.016  | NA |
| chr2 | 8816314   | 8817264   | AC011747.7 | ENSG00000235092 | -893  | 0.23 | 0.22 | 0.91 | 0.01    | NA |
| chr2 | 19547482  | 19548292  | AC092594.1 | ENSG00000236204 | -1378 | 0.55 | 0.33 | 0.91 | 0.22    | NA |
| chr2 | 28612964  | 28616748  | FOSL2      | ENSG00000075426 | -459  | 0.21 | 0.21 | 0.91 | 0.0038  | NA |
| chr2 | 105483753 | 105484426 | AC018730.4 | ENSG00000239587 | -135  | 0.38 | 0.36 | 0.91 | 0.016   | NA |
| chr2 | 121101800 | 121104534 | INHBB      | ENSG00000163083 | -552  | 0.22 | 0.23 | 0.91 | -0.0031 | NA |
| chr2 | 131450173 | 131450516 | AC140481.7 | ENSG00000240253 | -511  | 1    | 0.95 | 0.91 | 0.053   | NA |
| chr2 | 178977078 | 178977828 | RBM45      | ENSG00000155636 | 302   | 0.28 | 0.27 | 0.91 | 0.014   | NA |

|      |           |           |            |                 |       |      |      |      |         |    |
|------|-----------|-----------|------------|-----------------|-------|------|------|------|---------|----|
| chr2 | 201450526 | 201451027 | AOX1       | ENSG00000138356 | 185   | 0.2  | 0.2  | 0.91 | 0.0074  | NA |
| chr2 | 95690857  | 95692431  | MAL        | ENSG00000172005 | 222   | 0.3  | 0.29 | 0.92 | 0.008   | NA |
| chr2 | 130750104 | 130750424 | AC018865.5 | ENSG00000217289 | -198  | 0.54 | 0.46 | 0.92 | 0.074   | NA |
| chr2 | 238875131 | 238876327 | UBE2F      | ENSG00000184182 | 260   | 0.24 | 0.25 | 0.92 | -0.011  | NA |
| chr2 | 242606078 | 242606560 | ATG4B      | ENSG00000168397 | 308   | 0.85 | 0.87 | 0.92 | -0.015  | NA |
| chr2 | 197437    | 198535    | AC079779.7 | ENSG00000227061 | 417   | 0.98 | 0.97 | 0.93 | 0.01    | NA |
| chr2 | 43822928  | 43823370  | THADA      | ENSG00000115970 | -36   | 0.19 | 0.19 | 0.93 | 0.0084  | NA |
| chr2 | 70188511  | 70188726  | ASPRV1     | ENSG00000244617 | 779   | 1    | 0.98 | 0.93 | 0.02    | NA |
| chr2 | 139259033 | 139259912 | AC097721.2 | ENSG00000228043 | -228  | 0.2  | 0.19 | 0.93 | 0.0068  | NA |
| chr2 | 160568776 | 160569679 | AC009961.3 | ENSG00000226266 | -286  | 0.27 | 0.25 | 0.93 | 0.013   | NA |
| chr2 | 210673292 | 210673546 | SNAI1P1    | ENSG00000237194 | -109  | 0.98 | 1    | 0.93 | -0.02   | NA |
| chr2 | 220283200 | 220283750 | DES        | ENSG00000175084 | 376   | 0.33 | 0.32 | 0.93 | 0.0094  | NA |
| chr2 | 242673653 | 242675106 | D2HGDH     | ENSG00000180902 | 385   | 0.27 | 0.28 | 0.93 | -0.0072 | NA |
| chr2 | 20850712  | 20851173  | HS1BP3     | ENSG00000118960 | -104  | 0.18 | 0.19 | 0.94 | -0.01   | NA |
| chr2 | 24272582  | 24273313  | FKBP1B     | ENSG00000119782 | 363   | 0.2  | 0.2  | 0.94 | 0.0087  | NA |
| chr2 | 70352204  | 70352531  | AC016700.5 | ENSG00000231327 | 82    | 0.26 | 0.33 | 0.94 | -0.076  | NA |
| chr2 | 72370296  | 72370682  | CYP26B1    | ENSG00000003137 | -276  | 0.19 | 0.24 | 0.94 | -0.048  | NA |
| chr2 | 74776016  | 74776897  | DOK1       | ENSG00000115325 | 303   | 0.2  | 0.19 | 0.94 | 0.0054  | NA |
| chr2 | 85359956  | 85362593  | TCF7L1     | ENSG00000152284 | 741   | 0.24 | 0.24 | 0.94 | 0.0043  | NA |
| chr2 | 173600281 | 173600970 | RAPGEF4    | ENSG00000091428 | 100   | 0.27 | 0.27 | 0.94 | -0.0074 | NA |
| chr2 | 237071794 | 237078762 | GBX2       | ENSG00000168505 | 694   | 0.29 | 0.29 | 0.94 | -0.0019 | NA |
| chr2 | 239344401 | 239344627 | ASB1       | ENSG00000065802 | 704   | 1    | 0.97 | 0.94 | 0.025   | NA |
| chr2 | 242785911 | 242786616 | AC114730.2 | ENSG00000235151 | -269  | 0.3  | 0.29 | 0.94 | 0.0082  | NA |
| chr2 | 17934555  | 17935902  | SMC6       | ENSG00000163029 | -188  | 0.2  | 0.2  | 0.95 | 0.003   | NA |
| chr2 | 39102805  | 39103214  | DHX57      | ENSG00000163214 | 12    | 0.15 | 0.15 | 0.95 | -0.0079 | NA |
| chr2 | 70528608  | 70529337  | FAM136A    | ENSG00000035141 | 154   | 0.24 | 0.23 | 0.96 | 0.0066  | NA |
| chr2 | 74684565  | 74685789  | WBP1       | ENSG00000239779 | -279  | 0.19 | 0.2  | 0.96 | -0.0063 | NA |
| chr2 | 85107731  | 85108430  | C2orf89    | ENSG00000186854 | 126   | 0.2  | 0.19 | 0.96 | 0.009   | NA |
| chr2 | 85554134  | 85555414  | TGOLN2     | ENSG00000152291 | 334   | 0.24 | 0.18 | 0.96 | 0.054   | NA |
| chr2 | 131485149 | 131485460 | GPR148     | ENSG00000173302 | -1339 | 0.47 | 0.42 | 0.96 | 0.049   | NA |



|      |           |           |            |                 |       |      |      |      |         |    |
|------|-----------|-----------|------------|-----------------|-------|------|------|------|---------|----|
| chr2 | 160918674 | 160919177 | PLA2R1     | ENSG00000153246 | 196   | 0.18 | 0.21 | 0.96 | -0.027  | NA |
| chr2 | 198317967 | 198318631 | COQ10B     | ENSG00000115520 | 152   | 0.23 | 0.22 | 0.96 | 0.0063  | NA |
| chr2 | 220082991 | 220084012 | ABCB6      | ENSG00000115657 | -425  | 0.18 | 0.17 | 0.96 | 0.0042  | NA |
| chr2 | 241975533 | 241976318 | SNED1      | ENSG00000162804 | -712  | 0.29 | 0.32 | 0.96 | -0.036  | NA |
| chr2 | 8818928   | 8819586   | AC011747.7 | ENSG00000235092 | -316  | 0.25 | 0.24 | 0.97 | 0.01    | NA |
| chr2 | 68546339  | 68547111  | CNRIP1     | ENSG00000119865 | -193  | 0.17 | 0.18 | 0.97 | -0.0051 | NA |
| chr2 | 97405448  | 97405880  | LMAN2L     | ENSG00000114988 | 114   | 0.38 | 0.35 | 0.97 | 0.023   | NA |
| chr2 | 98611733  | 98612944  | TMEM131    | ENSG00000075568 | -331  | 0.28 | 0.27 | 0.98 | 0.0068  | NA |
| chr2 | 110969852 | 110970222 | NCRNA00116 | ENSG00000175701 | 363   | 0.14 | 0.11 | 0.98 | 0.032   | NA |
| chr2 | 9563126   | 9564282   | ITGB1BP1   | ENSG00000119185 | -488  | 0.24 | 0.24 | 0.99 | -0.0031 | NA |
| chr2 | 15731792  | 15732494  | DDX1       | ENSG00000079785 | 138   | 0.24 | 0.27 | 0.99 | -0.028  | NA |
| chr2 | 20212067  | 20212783  | MATN3      | ENSG00000132031 | 1     | 0.27 | 0.27 | 0.99 | 0.0041  | NA |
| chr2 | 45161427  | 45163058  | AC012354.4 | ENSG00000238204 | 336   | 0.23 | 0.23 | 0.99 | 0.0026  | NA |
| chr2 | 120436530 | 120437010 | TMEM177    | ENSG00000144120 | 27    | 0.27 | 0.25 | 0.99 | 0.02    | NA |
| chr2 | 241508424 | 241508627 | ANKMY1     | ENSG00000144504 | 69    | 0.18 | 0.2  | 0.99 | -0.02   | NA |
| chr2 | 308627    | 309040    | AC079779.5 | ENSG00000235779 | 546   | 1    | 1    | 1    | 0       | NA |
| chr2 | 558069    | 558469    | AC093326.3 | ENSG00000233633 | 65    | 1    | 1    | 1    | 0       | NA |
| chr2 | 732036    | 733096    | AC116609.1 | ENSG00000227713 | -1342 | 1    | 1    | 1    | 0       | NA |
| chr2 | 1516172   | 1516373   | TPO        | ENSG00000115705 | -933  | 0.83 | 1    | 1    | -0.17   | NA |
| chr2 | 3287874   | 3288228   | TSSC1      | ENSG00000032389 | -1454 | 1    | 0.97 | 1    | 0.031   | NA |
| chr2 | 6635949   | 6636160   | AC021021.2 | ENSG00000226488 | -81   | 0.98 | 0.96 | 1    | 0.013   | NA |
| chr2 | 9614194   | 9615235   | IAH1       | ENSG00000134330 | 55    | 0.2  | 0.2  | 1    | -0.0046 | NA |
| chr2 | 10861206  | 10862382  | ATP6V1C2   | ENSG00000143882 | 19    | 0.17 | 0.17 | 1    | 0.0015  | NA |
| chr2 | 11053661  | 11053952  | KCNF1      | ENSG00000162975 | 1743  | 0.94 | 0.94 | 1    | -0.0017 | NA |
| chr2 | 11295559  | 11296006  | PQLC3      | ENSG00000162976 | 179   | 0.19 | 0.18 | 1    | 0.0091  | NA |
| chr2 | 11750766  | 11751072  | GREB1      | ENSG00000196208 | -1466 | 0.97 | 1    | 1    | -0.031  | NA |
| chr2 | 18741356  | 18741964  | RDH14      | ENSG00000240857 | 285   | 0.17 | 0.17 | 1    | 0.0028  | NA |
| chr2 | 20101004  | 20102067  | TTC32      | ENSG00000183891 | -133  | 0.25 | 0.24 | 1    | 0.0033  | NA |
| chr2 | 23865573  | 23865776  | KLHL29     | ENSG00000119771 | 412   | 0.98 | 0.98 | 1    | -0.0053 | NA |
| chr2 | 24582620  | 24583611  | ITSN2      | ENSG00000198399 | 226   | 0.13 | 0.13 | 1    | 0.0013  | NA |

|      |          |          |            |                 |       |      |      |   |         |    |
|------|----------|----------|------------|-----------------|-------|------|------|---|---------|----|
| chr2 | 27440128 | 27440786 | CAD        | ENSG00000084774 | 199   | 0.14 | 0.14 | 1 | -0.0027 | NA |
| chr2 | 27616205 | 27616440 | FTH1P3     | ENSG00000213453 | -88   | 1    | 1    | 1 | 0       | NA |
| chr2 | 27717681 | 27718337 | FNDC4      | ENSG00000115226 | 20    | 0.19 | 0.2  | 1 | -0.0017 | NA |
| chr2 | 30369311 | 30370921 | YPEL5      | ENSG00000119801 | 309   | 0.22 | 0.22 | 1 | #####   | NA |
| chr2 | 33171448 | 33173164 | LTBP1      | ENSG00000049323 | 267   | 0.25 | 0.25 | 1 | -0.0033 | NA |
| chr2 | 36824792 | 36825305 | FEZ2       | ENSG00000171055 | 237   | 0.21 | 0.21 | 1 | 0.0019  | NA |
| chr2 | 40006090 | 40006463 | THUMPD2    | ENSG00000138050 | 13    | 1    | 1    | 1 | 0       | NA |
| chr2 | 42588072 | 42588875 | COX7A2L    | ENSG00000115944 | -184  | 0.19 | 0.18 | 1 | 0.01    | NA |
| chr2 | 42795847 | 42796230 | MTA3       | ENSG00000057935 | 160   | 0.22 | 0.21 | 1 | 0.013   | NA |
| chr2 | 43054714 | 43055298 | AC098824.6 | ENSG00000232202 | -249  | 0.24 | 0.25 | 1 | -0.0081 | NA |
| chr2 | 47917888 | 47918414 | AC079250.1 | ENSG00000230979 | 234   | 1    | 0.99 | 1 | 0.011   | NA |
| chr2 | 54342634 | 54343088 | ACYP2      | ENSG00000170634 | 220   | 0.16 | 0.17 | 1 | -0.015  | NA |
| chr2 | 55746675 | 55746999 | CCDC104    | ENSG00000163001 | 97    | 0.21 | 0.2  | 1 | 0.0053  | NA |
| chr2 | 58478734 | 58478938 | EIF3FP3    | ENSG00000233426 | -185  | 0.96 | 0.96 | 1 | -0.007  | NA |
| chr2 | 60778557 | 60779068 | BCL11A     | ENSG00000119866 | -763  | 0.17 | 0.17 | 1 | 0.00047 | NA |
| chr2 | 60782535 | 60782779 | BCL11A     | ENSG00000119866 | -1955 | 0.5  | 0.44 | 1 | 0.056   | NA |
| chr2 | 62932595 | 62933353 | EHBP1      | ENSG00000115504 | 187   | 0.2  | 0.18 | 1 | 0.015   | NA |
| chr2 | 63272127 | 63272409 | EHBP1      | ENSG00000115504 | 294   | 0.99 | 1    | 1 | -0.011  | NA |
| chr2 | 63815200 | 63816110 | WDPCP      | ENSG00000143951 | -255  | 0.19 | 0.18 | 1 | 0.0029  | NA |
| chr2 | 70351315 | 70351550 | AC016700.5 | ENSG00000231327 | 1017  | 0.3  | 0.27 | 1 | 0.038   | NA |
| chr2 | 70933288 | 70933563 | ADD2       | ENSG00000075340 | 115   | 0.94 | 0.94 | 1 | 0.0064  | NA |
| chr2 | 74699240 | 74699909 | MRPL53     | ENSG00000204822 | 100   | 0.38 | 0.37 | 1 | 0.0081  | NA |
| chr2 | 74981752 | 74981972 | AC007387.2 | ENSG00000224646 | 84    | 1    | 1    | 1 | 0       | NA |
| chr2 | 75060879 | 75062664 | HK2        | ENSG00000159399 | 663   | 0.22 | 0.22 | 1 | 0.002   | NA |
| chr2 | 75873981 | 75874420 | MRPL19     | ENSG00000115364 | 95    | 0.21 | 0.21 | 1 | 0.0028  | NA |
| chr2 | 85131950 | 85132234 | TMSB10     | ENSG00000034510 | -657  | 0.64 | 0.75 | 1 | -0.11   | NA |
| chr2 | 85581618 | 85581963 | RETSAT     | ENSG00000042445 | -167  | 0.12 | 0.13 | 1 | -0.0058 | NA |
| chr2 | 88926237 | 88927295 | EIF2AK3    | ENSG00000172071 | 130   | 0.22 | 0.22 | 1 | -0.0022 | NA |
| chr2 | 96990857 | 96991283 | ITPRIPL1   | ENSG00000198885 | 1     | 0.22 | 0.14 | 1 | 0.072   | NA |
| chr2 | 98350984 | 98351257 | ZAP70      | ENSG00000115085 | 251   | 1    | 1    | 1 | 0       | NA |

|      |           |           |             |                 |       |      |      |   |         |    |
|------|-----------|-----------|-------------|-----------------|-------|------|------|---|---------|----|
| chr2 | 98351659  | 98352017  | ZAP70       | ENSG00000115085 | 145   | 1    | 1    | 1 | 0       | NA |
| chr2 | 99224681  | 99225322  | C2orf64     | ENSG00000183513 | -46   | 0.2  | 0.19 | 1 | 0.0016  | NA |
| chr2 | 99757355  | 99758220  | TSGA10      | ENSG00000135951 | -175  | 0.21 | 0.21 | 1 | 0.0039  | NA |
| chr2 | 100720385 | 100720741 | AFF3        | ENSG00000144218 | 429   | 0.25 | 0.4  | 1 | -0.15   | NA |
| chr2 | 108160701 | 108160912 | AC096669.3  | ENSG00000224568 | 1601  | 1    | 1    | 1 | 0       | NA |
| chr2 | 108443279 | 108446501 | AC096655.2  | ENSG00000230651 | -1605 | 0.97 | 0.97 | 1 | -0.0014 | NA |
| chr2 | 109335768 | 109336670 | RANBP2      | ENSG00000153201 | 282   | 0.19 | 0.19 | 1 | -0.0007 | NA |
| chr2 | 110744375 | 110746047 | AC013268.5  | ENSG00000204588 | 571   | 1    | 1    | 1 | 0       | NA |
| chr2 | 113032793 | 113033496 | ZC3H6       | ENSG00000188177 | -27   | 0.27 | 0.26 | 1 | 0.0097  | NA |
| chr2 | 113808517 | 113808756 | IL1F8       | ENSG00000136696 | 1808  | 1    | 1    | 1 | 0       | NA |
| chr2 | 113956343 | 113957042 | PSD4        | ENSG00000125637 | 557   | 0.21 | 0.21 | 1 | 0.005   | NA |
| chr2 | 113993204 | 113994075 | AC016683.6  | ENSG00000189223 | -175  | 0.98 | 0.99 | 1 | -0.0065 | NA |
| chr2 | 114384589 | 114385133 | RPL23AP7    | ENSG00000240356 | -244  | 0.17 | 0.13 | 1 | 0.032   | NA |
| chr2 | 119606569 | 119606826 | EN1         | ENSG00000163064 | -1443 | 0.25 | 0.26 | 1 | -0.0055 | NA |
| chr2 | 120517066 | 120518010 | PTPN4       | ENSG00000088179 | 331   | 0.17 | 0.18 | 1 | -0.0067 | NA |
| chr2 | 128432194 | 128432743 | LIMS2       | ENSG00000072163 | 208   | 0.35 | 0.33 | 1 | 0.016   | NA |
| chr2 | 130794460 | 130794815 | AC018865.9  | ENSG00000231240 | 106   | 0.88 | 1    | 1 | -0.12   | NA |
| chr2 | 130878522 | 130878800 | POTEF       | ENSG00000196604 | -479  | 0.97 | 0.97 | 1 | 0.0031  | NA |
| chr2 | 131010510 | 131010764 | AC068137.2  | ENSG00000236595 | 1496  | 0.39 | 0.4  | 1 | -0.0054 | NA |
| chr2 | 132121263 | 132121762 | AC073869.1  | ENSG00000233087 | -219  | 0.26 | 0.24 | 1 | 0.014   | NA |
| chr2 | 132152149 | 132152440 | AC131180.5  | ENSG00000226831 | 821   | 0.49 | 0.5  | 1 | -0.0055 | NA |
| chr2 | 132202265 | 132203257 | AC073869.20 | ENSG00000217950 | -294  | 0.97 | 0.97 | 1 | -0.0032 | NA |
| chr2 | 132233606 | 132234085 | TUBA3D      | ENSG00000075886 | 179   | 0.98 | 0.99 | 1 | -0.0063 | NA |
| chr2 | 133011612 | 133011908 | 5_8S_rRNA   | ENSG00000202174 | -882  | 0.7  | 0.68 | 1 | 0.025   | NA |
| chr2 | 135675772 | 135677088 | CCNT2       | ENSG00000082258 | 625   | 0.24 | 0.23 | 1 | 0.011   | NA |
| chr2 | 147344801 | 147345379 | PABPC1P2    | ENSG00000198526 | 78    | 0.98 | 0.99 | 1 | -0.0025 | NA |
| chr2 | 150186463 | 150187492 | LYPD6       | ENSG00000187123 | 478   | 0.22 | 0.22 | 1 | 0.0026  | NA |
| chr2 | 154728944 | 154729328 | GALNT13     | ENSG00000144278 | 670   | 0.22 | 0.24 | 1 | -0.017  | NA |
| chr2 | 157292102 | 157292646 | GPD2        | ENSG00000115159 | 83    | 0.19 | 0.19 | 1 | 0.0047  | NA |
| chr2 | 158453799 | 158454111 | ACV1C       | ENSG00000123612 | 117   | 0.33 | 0.34 | 1 | -0.0076 | NA |

|      |           |           |            |                 |       |      |      |   |         |    |
|------|-----------|-----------|------------|-----------------|-------|------|------|---|---------|----|
| chr2 | 159313172 | 159313416 | CCDC148    | ENSG00000153237 | -80   | 0.21 | 0.17 | 1 | 0.04    | NA |
| chr2 | 160472088 | 160472736 | BAZ2B      | ENSG00000123636 | -341  | 0.18 | 0.19 | 1 | -0.0046 | NA |
| chr2 | 161349223 | 161350371 | RBMS1      | ENSG00000153250 | -317  | 0.25 | 0.25 | 1 | 0.00028 | NA |
| chr2 | 185463208 | 185463589 | ZNF804A    | ENSG00000170396 | 305   | 0.28 | 0.28 | 1 | 0.0063  | NA |
| chr2 | 191512946 | 191514439 | NAB1       | ENSG00000138386 | 71    | 0.2  | 0.2  | 1 | 0.0016  | NA |
| chr2 | 192746684 | 192746996 | DNAJB1P1   | ENSG00000213946 | 91    | 1    | 1    | 1 | 0       | NA |
| chr2 | 201728892 | 201729577 | CLK1       | ENSG00000013441 | -259  | 0.18 | 0.17 | 1 | 0.006   | NA |
| chr2 | 201828015 | 201828514 | AC005037.3 | ENSG00000183308 | 242   | 0.17 | 0.16 | 1 | 0.0064  | NA |
| chr2 | 201983198 | 201983709 | CFLAR      | ENSG00000003402 | 239   | 0.17 | 0.17 | 1 | -0.0033 | NA |
| chr2 | 202483584 | 202483957 | ALS2CR11   | ENSG00000155754 | 107   | 0.81 | 0.81 | 1 | 0.00079 | NA |
| chr2 | 206549599 | 206551316 | NRP2       | ENSG00000118257 | -60   | 0.19 | 0.2  | 1 | -0.0046 | NA |
| chr2 | 207308266 | 207308907 | ADAM23     | ENSG00000114948 | 47    | 0.17 | 0.17 | 1 | -0.0032 | NA |
| chr2 | 207506774 | 207507422 | AC010731.4 | ENSG00000235118 | -44   | 0.3  | 0.28 | 1 | 0.02    | NA |
| chr2 | 209224972 | 209225308 | PTH2R      | ENSG00000144407 | 702   | 0.97 | 0.97 | 1 | 0.002   | NA |
| chr2 | 210010093 | 210010367 | AC013409.2 | ENSG00000232799 | 265   | 0.96 | 0.96 | 1 | 0.0082  | NA |
| chr2 | 210636344 | 210636935 | UNC80      | ENSG00000144406 | -78   | 0.26 | 0.26 | 1 | 0.0026  | NA |
| chr2 | 219134787 | 219135393 | AAMP       | ENSG00000127837 | -279  | 0.27 | 0.28 | 1 | -0.0064 | NA |
| chr2 | 220071305 | 220071759 | ZFAND2B    | ENSG00000158552 | 26    | 0.18 | 0.18 | 1 | 0.00085 | NA |
| chr2 | 220420729 | 220420994 | OBSL1      | ENSG00000124006 | 888   | 1    | 1    | 1 | 0       | NA |
| chr2 | 223536122 | 223536565 | MOGAT1     | ENSG00000124003 | -162  | 0.21 | 0.21 | 1 | -0.0001 | NA |
| chr2 | 233272404 | 233272700 | ALPPL2     | ENSG00000163286 | 999   | 0.98 | 1    | 1 | -0.019  | NA |
| chr2 | 234663595 | 234664071 | AC114812.5 | ENSG00000178836 | 82    | 0.92 | 0.94 | 1 | -0.016  | NA |
| chr2 | 235951452 | 235951814 | SH3BP4     | ENSG00000130147 | 772   | 0.99 | 0.98 | 1 | 0.012   | NA |
| chr2 | 237416090 | 237416382 | IQCA1      | ENSG00000132321 | -144  | 0.44 | 0.47 | 1 | -0.035  | NA |
| chr2 | 239009072 | 239009361 | ESPNL      | ENSG00000144488 | 155   | 0.84 | 0.83 | 1 | 0.0013  | NA |
| chr2 | 239037357 | 239037583 | ESPNL      | ENSG00000144488 | -119  | 0.98 | 1    | 1 | -0.02   | NA |
| chr2 | 240111314 | 240111577 | HDAC4      | ENSG00000068024 | 1307  | 0.98 | 0.99 | 1 | -0.0069 | NA |
| chr2 | 241505922 | 241506133 | RNPEPL1    | ENSG00000142327 | 806   | 0.14 | 0.17 | 1 | -0.024  | NA |
| chr2 | 242139773 | 242139985 | ANO7       | ENSG00000146205 | 1367  | 0.99 | 0.98 | 1 | 0.014   | NA |
| chr2 | 242149674 | 242149906 | ANO7       | ENSG00000146205 | -1773 | 0.95 | 1    | 1 | -0.051  | NA |

|      |           |           |            |                 |       |      |      |    |         |    |
|------|-----------|-----------|------------|-----------------|-------|------|------|----|---------|----|
| chr2 | 242572311 | 242572702 | THAP4      | ENSG00000176946 | 273   | 0.88 | 0.88 | 1  | 0.0023  | NA |
| chr2 | 242742598 | 242743758 | AC114730.5 | ENSG00000215023 | -1856 | 0.17 | 0.17 | 1  | -0.0015 | NA |
| chr2 | 308099    | 308395    | AC079779.5 | ENSG00000235779 | -1090 | NA   | 1    | NA | NA      | NA |
| chr2 | 18059038  | 18059245  | KCNS3      | ENSG00000170745 | 27    | 1    | NA   | NA | NA      | NA |
| chr2 | 27712554  | 27712842  | IFT172     | ENSG00000138002 | -130  | 0.13 | NA   | NA | NA      | NA |
| chr2 | 32390677  | 32390948  | SLC30A6    | ENSG00000152683 | -121  | 0.42 | NA   | NA | NA      | NA |
| chr2 | 32853007  | 32853270  | TTC27      | ENSG00000018699 | 39    | 0.22 | NA   | NA | NA      | NA |
| chr2 | 46707608  | 46707899  | AC018682.6 | ENSG00000187600 | 1028  | NA   | 1    | NA | NA      | NA |
| chr2 | 53994891  | 53995169  | CHAC2      | ENSG00000143942 | 101   | 0.18 | NA   | NA | NA      | NA |
| chr2 | 70485231  | 70485679  | PCYOX1     | ENSG00000116005 | 186   | 1    | NA   | NA | NA      | NA |
| chr2 | 87036600  | 87037001  | CD8A       | ENSG00000153563 | -1281 | 0.97 | NA   | NA | NA      | NA |
| chr2 | 97530558  | 97530801  | SEMA4C     | ENSG00000168758 | -1614 | 0.38 | NA   | NA | NA      | NA |
| chr2 | 97760184  | 97760756  | FAHD2B     | ENSG00000144199 | 86    | 0.12 | NA   | NA | NA      | NA |
| chr2 | 105858587 | 105859084 | GPR45      | ENSG00000135973 | 635   | 1    | NA   | NA | NA      | NA |
| chr2 | 111333956 | 111334845 | RGPD6      | ENSG00000183054 | 0     | NA   | 1    | NA | NA      | NA |
| chr2 | 111367813 | 111368169 | AC123886.2 | ENSG00000231536 | -502  | 0.27 | NA   | NA | NA      | NA |
| chr2 | 111436107 | 111436429 | BUB1       | ENSG00000169679 | -577  | NA   | 0.27 | NA | NA      | NA |
| chr2 | 112811809 | 112812134 | TMEM87B    | ENSG00000153214 | -829  | 0.33 | NA   | NA | NA      | NA |
| chr2 | 130902120 | 130902704 | CCDC74B    | ENSG00000152076 | 155   | 0.27 | NA   | NA | NA      | NA |
| chr2 | 131185233 | 131185588 | AC010984.3 | ENSG00000230646 | 106   | 0.5  | NA   | NA | NA      | NA |
| chr2 | 131328276 | 131329020 | AC140481.2 | ENSG00000183292 | 246   | NA   | 1    | NA | NA      | NA |
| chr2 | 131451057 | 131451412 | AC140481.7 | ENSG00000240253 | -74   | 0.36 | NA   | NA | NA      | NA |
| chr2 | 132056862 | 132057199 | AC131180.3 | ENSG00000236516 | 987   | 1    | NA   | NA | NA      | NA |
| chr2 | 132152766 | 132153044 | AC131180.5 | ENSG00000226831 | 210   | NA   | 1    | NA | NA      | NA |
| chr2 | 132285408 | 132285992 | CCDC74A    | ENSG00000163040 | 271   | 0.16 | NA   | NA | NA      | NA |
| chr2 | 136876711 | 136877051 | CXCR4      | ENSG00000121966 | -1146 | 0.57 | NA   | NA | NA      | NA |
| chr2 | 154729613 | 154729918 | GALNT13    | ENSG00000144278 | 1299  | 0.21 | NA   | NA | NA      | NA |
| chr2 | 161126364 | 161126825 | ITGB6      | ENSG00000115221 | 1166  | NA   | 0.13 | NA | NA      | NA |
| chr2 | 167232388 | 167232711 | SCN9A      | ENSG00000169432 | -52   | 0.4  | NA   | NA | NA      | NA |
| chr2 | 172373817 | 172374199 | AC007969.5 | ENSG00000233762 | 218   | 1    | NA   | NA | NA      | NA |

|       |           |           |                |                 |       |      |      |          |       |    |
|-------|-----------|-----------|----------------|-----------------|-------|------|------|----------|-------|----|
| chr2  | 179343255 | 179343500 | FKBP7          | ENSG00000079150 | -100  | 0.5  | NA   | NA       | NA    | NA |
| chr2  | 190306157 | 190306433 | WDR75          | ENSG00000115368 | 136   | 0.15 | NA   | NA       | NA    | NA |
| chr2  | 203130313 | 203130760 | NOP58          | ENSG00000055044 | 97    | 0.12 | NA   | NA       | NA    | NA |
| chr2  | 217363524 | 217363826 | RPL37A         | ENSG00000197756 | 127   | 0.39 | NA   | NA       | NA    | NA |
| chr2  | 219906107 | 219906328 | CCDC108        | ENSG00000181378 | 9     | 0.5  | NA   | NA       | NA    | NA |
| chr2  | 233244323 | 233244651 | ALPP           | ENSG00000163283 | 1053  | NA   | 1    | NA       | NA    | NA |
| chr2  | 241989164 | 241989461 | SNED1          | ENSG00000162804 | -1382 | 0.75 | NA   | NA       | NA    | NA |
| chr20 | 4803013   | 4804146   | RASSF2         | ENSG00000101265 | 523   | 0.43 | 0.22 | 4.30E-09 | 0.21  | NA |
| chr20 | 3766343   | 3767636   | CENPB          | ENSG00000125817 | 348   | 0.3  | 0.15 | 1.60E-08 | 0.16  | NA |
| chr20 | 31170740  | 31173640  | C20orf112      | ENSG00000197183 | 440   | 0.34 | 0.2  | 2.40E-08 | 0.15  | NA |
| chr20 | 2082284   | 2084070   | STK35          | ENSG00000125834 | 649   | 0.35 | 0.19 | 3.30E-08 | 0.17  | NA |
| chr20 | 41817475  | 41819212  | PTPRT          | ENSG00000196090 | 30    | 0.31 | 0.14 | 1.00E-07 | 0.17  | NA |
| chr20 | 62406463  | 62407179  | ZBTB46         | ENSG00000130584 | 494   | 0.65 | 0.11 | 1.30E-07 | 0.54  | NA |
| chr20 | 30135076  | 30135292  | HM13           | ENSG00000101294 | -1    | 0.66 | 0.38 | 2.70E-07 | 0.28  | NA |
| chr20 | 3153637   | 3155011   | RP5-1187M17.10 | ENSG00000088899 | -132  | 0.39 | 0.19 | 3.10E-07 | 0.19  | NA |
| chr20 | 45338071  | 45338663  | SLC2A10        | ENSG00000197496 | 241   | 0.51 | 0.21 | 3.80E-07 | 0.3   | NA |
| chr20 | 61568678  | 61569916  | DIDO1          | ENSG00000101191 | -23   | 0.36 | 0.18 | 3.80E-07 | 0.18  | NA |
| chr20 | 3052097   | 3053103   | OXT            | ENSG00000101405 | 334   | 0.52 | 0.34 | 4.30E-07 | 0.18  | NA |
| chr20 | 58662457  | 58662960  | RP5-1043L13.1  | ENSG00000228340 | -187  | 0.16 | 0.35 | 5.90E-07 | -0.19 | NA |
| chr20 | 43932912  | 43933400  | MATN4          | ENSG00000124159 | 1075  | 0.97 | 0.59 | 9.40E-07 | 0.38  | NA |
| chr20 | 33871956  | 33872739  | EIF6           | ENSG00000242372 | -21   | 0.31 | 0.14 | 2.10E-06 | 0.16  | NA |
| chr20 | 22557517  | 22559240  | NCRNA00261     | ENSG00000225074 | 902   | 0.39 | 0.21 | 2.20E-06 | 0.18  | NA |
| chr20 | 57429024  | 57431239  | GNAS           | ENSG00000087460 | 907   | 0.61 | 0.51 | 2.50E-06 | 0.1   | NA |
| chr20 | 62288941  | 62290058  | AL353715.1     | ENSG00000258366 | 336   | 0.32 | 0.18 | 3.30E-06 | 0.15  | NA |
| chr20 | 35374110  | 35374654  | NDRG3          | ENSG00000101079 | 74    | 0.33 | 0.1  | 3.80E-06 | 0.24  | NA |
| chr20 | 5107202   | 5108086   | PCNA           | ENSG00000132646 | -372  | 0.29 | 0.16 | 5.90E-06 | 0.13  | NA |
| chr20 | 62338659  | 62340274  | ZGPAT          | ENSG00000197114 | 672   | 0.31 | 0.19 | 6.60E-06 | 0.12  | NA |
| chr20 | 61583891  | 61584222  | SLC17A9        | ENSG00000101194 | 4     | 0.21 | 0.78 | 8.90E-06 | -0.57 | NA |
| chr20 | 39316550  | 39319987  | MAFB           | ENSG00000204103 | -770  | 0.25 | 0.17 | 1.10E-05 | 0.075 | NA |
| chr20 | 36793549  | 36793867  | TGM2           | ENSG00000198959 | -47   | 0.46 | 0.23 | 1.80E-05 | 0.23  | NA |

|       |          |          |               |                 |       |      |      |          |       |    |
|-------|----------|----------|---------------|-----------------|-------|------|------|----------|-------|----|
| chr20 | 50383675 | 50384904 | ATP9A         | ENSG00000054793 | 578   | 0.46 | 0.21 | 2.20E-05 | 0.25  | NA |
| chr20 | 60882593 | 60882900 | RP11-157P1.4  | ENSG00000226332 | -1294 | 0.65 | 0.39 | 2.40E-05 | 0.26  | NA |
| chr20 | 2731063  | 2731395  | EBF4          | ENSG00000088881 | -1108 | 0.53 | 0.12 | 2.80E-05 | 0.41  | NA |
| chr20 | 3653190  | 3654773  | ADAM33        | ENSG00000149451 | 413   | 0.52 | 0.39 | 3.40E-05 | 0.13  | NA |
| chr20 | 33680055 | 33680334 | TRPC4AP       | ENSG00000100991 | 416   | 0.15 | 0.6  | 3.60E-05 | -0.45 | NA |
| chr20 | 55840216 | 55841794 | BMP7          | ENSG00000101144 | -171  | 0.36 | 0.22 | 3.80E-05 | 0.14  | NA |
| chr20 | 35724039 | 35724644 | RBL1          | ENSG00000080839 | 51    | 0.5  | 0.24 | 4.10E-05 | 0.27  | NA |
| chr20 | 13200670 | 13202616 | ISM1          | ENSG00000101230 | -775  | 0.21 | 0.13 | 4.90E-05 | 0.081 | NA |
| chr20 | 18547890 | 18548298 | RP11-379J5.2  | ENSG00000232388 | 30    | 0.36 | 0.15 | 4.90E-05 | 0.2   | NA |
| chr20 | 4228532  | 4230496  | ADRA1D        | ENSG00000171873 | 207   | 0.33 | 0.21 | 5.90E-05 | 0.12  | NA |
| chr20 | 62079615 | 62079912 | RP11-358D14.2 | ENSG00000226390 | 359   | 0.86 | 0.33 | 6.70E-05 | 0.53  | NA |
| chr20 | 2672904  | 2674698  | EBF4          | ENSG00000088881 | 321   | 0.28 | 0.18 | 7.20E-05 | 0.094 | NA |
| chr20 | 9048958  | 9050018  | PLCB4         | ENSG00000101333 | 78    | 0.32 | 0.17 | 7.40E-05 | 0.14  | NA |
| chr20 | 21376358 | 21378245 | RP11-227D2.3  | ENSG00000225280 | -1155 | 0.27 | 0.16 | 8.50E-05 | 0.11  | NA |
| chr20 | 62321053 | 62321259 | AL353715.1    | ENSG00000258366 | -43   | 0.93 | 0.69 | 9.90E-05 | 0.24  | NA |
| chr20 | 60969767 | 60970111 | CABLES2       | ENSG00000149679 | 1448  | 0.9  | 0.56 | 0.00013  | 0.34  | NA |
| chr20 | 361489   | 362805   | TRIB3         | ENSG00000101255 | 257   | 0.26 | 0.16 | 0.00019  | 0.1   | NA |
| chr20 | 6748052  | 6749546  | BMP2          | ENSG00000125845 | 488   | 0.21 | 0.13 | 0.00025  | 0.075 | NA |
| chr20 | 277831   | 279155   | AL034548.2    | ENSG00000247315 | 279   | 0.24 | 0.15 | 0.00031  | 0.097 | NA |
| chr20 | 36661834 | 36662495 | TTI1          | ENSG00000101407 | -301  | 0.4  | 0.13 | 5.00E-04 | 0.27  | NA |
| chr20 | 35089448 | 35089998 | DLGAP4        | ENSG00000080845 | -18   | 0.39 | 0.17 | 0.00062  | 0.21  | NA |
| chr20 | 47443734 | 47445181 | PREX1         | ENSG00000124126 | -37   | 0.21 | 0.14 | 0.00065  | 0.073 | NA |
| chr20 | 3063005  | 3064146  | AVP           | ENSG00000101200 | 1795  | 0.24 | 0.34 | 0.00071  | -0.1  | NA |
| chr20 | 18039532 | 18039928 | OVOL2         | ENSG00000125850 | -36   | 0.24 | 0.09 | 0.00074  | 0.15  | NA |
| chr20 | 62600653 | 62601676 | ZNF512B       | ENSG00000196700 | 54    | 0.28 | 0.17 | 0.00078  | 0.12  | NA |
| chr20 | 57463652 | 57467739 | GNAS          | ENSG00000087460 | 1861  | 0.41 | 0.35 | 8.00E-04 | 0.062 | NA |
| chr20 | 55964916 | 55965271 | RBM38         | ENSG00000132819 | -1370 | 0.98 | 0.81 | 0.00085  | 0.17  | NA |
| chr20 | 62178442 | 62179183 | SRMS          | ENSG00000125508 | 45    | 0.44 | 0.59 | 0.00095  | -0.15 | NA |
| chr20 | 39945594 | 39946053 | ZHX3          | ENSG00000174306 | 501   | 0.3  | 0.14 | 0.00096  | 0.16  | NA |
| chr20 | 30618793 | 30619138 | RP1-310O13.7  | ENSG00000226239 | 413   | 0.52 | 0.24 | 0.001    | 0.28  | NA |

|       |          |          |              |                 |      |      |      |        |       |    |
|-------|----------|----------|--------------|-----------------|------|------|------|--------|-------|----|
| chr20 | 30432900 | 30433242 | FOXS1        | ENSG00000179772 | 349  | 0.85 | 0.67 | 0.0012 | 0.18  | NA |
| chr20 | 32077657 | 32078469 | CBFA2T2      | ENSG00000078699 | 182  | 0.23 | 0.13 | 0.0012 | 0.1   | NA |
| chr20 | 3995573  | 3996405  | RNF24        | ENSG00000101236 | 47   | 0.26 | 0.14 | 0.0013 | 0.12  | NA |
| chr20 | 10015610 | 10015914 | ANKRD5       | ENSG00000132623 | 73   | 0.24 | 0.1  | 0.0015 | 0.14  | NA |
| chr20 | 29611520 | 29612357 | FRG1B        | ENSG00000149531 | 81   | 0.32 | 0.43 | 0.0016 | -0.1  | NA |
| chr20 | 5099993  | 5100866  | PCNA         | ENSG00000132646 | 243  | 0.24 | 0.43 | 0.0018 | -0.19 | NA |
| chr20 | 5891878  | 5892417  | CHGB         | ENSG00000089199 | 71   | 0.32 | 0.17 | 0.0019 | 0.15  | NA |
| chr20 | 61049361 | 61051897 | GATA5        | ENSG00000130700 | -52  | 0.25 | 0.19 | 0.0019 | 0.058 | NA |
| chr20 | 44717760 | 44718813 | NCOA5        | ENSG00000124160 | 305  | 0.3  | 0.21 | 0.002  | 0.098 | NA |
| chr20 | 30225572 | 30225852 | COX4I2       | ENSG00000131055 | 21   | 0.96 | 0.62 | 0.0022 | 0.34  | NA |
| chr20 | 60941619 | 60942684 | LAMA5        | ENSG00000130702 | 175  | 0.3  | 0.18 | 0.0022 | 0.12  | NA |
| chr20 | 1246693  | 1247485  | SNPH         | ENSG00000101298 | 129  | 0.4  | 0.18 | 0.0023 | 0.22  | NA |
| chr20 | 18036864 | 18038633 | OVOL2        | ENSG00000125850 | 773  | 0.25 | 0.15 | 0.0026 | 0.096 | NA |
| chr20 | 62551622 | 62551914 | MIR941-1     | ENSG00000215946 | 392  | 0.97 | 0.75 | 0.0026 | 0.22  | NA |
| chr20 | 61903907 | 61904701 | NKAIN4       | ENSG00000101198 | -258 | 0.27 | 0.18 | 0.0027 | 0.093 | NA |
| chr20 | 43438737 | 43439546 | RIMS4        | ENSG00000101098 | -229 | 0.28 | 0.16 | 0.0029 | 0.12  | NA |
| chr20 | 2820509  | 2821911  | FAM113A      | ENSG00000132635 | 107  | 0.41 | 0.27 | 0.0031 | 0.14  | NA |
| chr20 | 50721310 | 50721912 | ZFP64        | ENSG00000020256 | -222 | 0.25 | 0.14 | 0.0033 | 0.11  | NA |
| chr20 | 21080929 | 21082824 | NCRNA00237   | ENSG00000225127 | 324  | 0.28 | 0.18 | 0.0034 | 0.099 | NA |
| chr20 | 5591490  | 5591875  | GPCPD1       | ENSG00000125772 | -112 | 0.38 | 0.23 | 0.0036 | 0.15  | NA |
| chr20 | 25388232 | 25388642 | GINS1        | ENSG00000101003 | 74   | 0.3  | 0.09 | 0.0036 | 0.21  | NA |
| chr20 | 43280061 | 43280727 | ADA          | ENSG00000196839 | -92  | 0.33 | 0.2  | 0.0037 | 0.14  | NA |
| chr20 | 30437283 | 30437732 | DUSP15       | ENSG00000149599 | -146 | 0.24 | 0.48 | 0.0041 | -0.24 | NA |
| chr20 | 35169189 | 35169540 | MYL9         | ENSG00000101335 | -523 | 0.96 | 0.8  | 0.0041 | 0.16  | NA |
| chr20 | 1293681  | 1294328  | SDCBP2       | ENSG00000125775 | 313  | 0.52 | 0.35 | 0.0045 | 0.17  | NA |
| chr20 | 62257589 | 62259476 | GMEB2        | ENSG00000101216 | -138 | 0.29 | 0.21 | 0.0047 | 0.08  | NA |
| chr20 | 1927718  | 1928118  | RP4-684O24.5 | ENSG00000233896 | 26   | 0.52 | 0.15 | 0.0052 | 0.37  | NA |
| chr20 | 55200279 | 55206789 | TFAP2C       | ENSG00000087510 | -824 | 0.3  | 0.24 | 0.0053 | 0.054 | NA |
| chr20 | 61151586 | 61151903 | MIR1-1       | ENSG00000199017 | 234  | 0.91 | 0.43 | 0.0054 | 0.48  | NA |
| chr20 | 54578603 | 54580678 | CBLN4        | ENSG00000054803 | 888  | 0.23 | 0.17 | 0.0055 | 0.063 | NA |



|       |          |          |              |                 |       |      |      |        |        |    |
|-------|----------|----------|--------------|-----------------|-------|------|------|--------|--------|----|
| chr20 | 62886688 | 62887463 | PCMTD2       | ENSG00000203880 | 27    | 0.26 | 0.13 | 0.0057 | 0.13   | NA |
| chr20 | 9819271  | 9819861  | PAK7         | ENSG00000101349 | -87   | 0.31 | 0.2  | 0.0063 | 0.11   | NA |
| chr20 | 23338410 | 23339078 | RP3-322G13.5 | ENSG00000232645 | -252  | 0.28 | 0.17 | 0.0066 | 0.1    | NA |
| chr20 | 18447429 | 18448341 | C20orf12     | ENSG00000089091 | -240  | 0.25 | 0.15 | 0.0067 | 0.1    | NA |
| chr20 | 55904668 | 55904976 | SPO11        | ENSG00000054796 | 7     | 0.97 | 0.7  | 0.0068 | 0.27   | NA |
| chr20 | 58152280 | 58152847 | PHACTR3      | ENSG00000087495 | -1    | 0.34 | 0.21 | 0.008  | 0.13   | NA |
| chr20 | 62283516 | 62284835 | STMN3        | ENSG00000197457 | -56   | 0.24 | 0.17 | 0.0081 | 0.074  | NA |
| chr20 | 2632678  | 2633690  | NOP56        | ENSG00000101361 | 393   | 0.23 | 0.15 | 0.0082 | 0.087  | NA |
| chr20 | 327376   | 328977   | NRSN2        | ENSG00000125841 | 649   | 0.3  | 0.19 | 0.0084 | 0.11   | NA |
| chr20 | 31407531 | 31408124 | MAPRE1       | ENSG00000101367 | 128   | 0.27 | 0.13 | 0.0094 | 0.14   | NA |
| chr20 | 62496243 | 62497196 | TPD52L2      | ENSG00000101150 | 123   | 0.27 | 0.17 | 0.01   | 0.099  | NA |
| chr20 | 1206679  | 1207119  | RAD21L1      | ENSG00000244588 | 199   | 0.24 | 0.11 | 0.012  | 0.14   | NA |
| chr20 | 17511478 | 17512209 | BFSP1        | ENSG00000125864 | 171   | 0.36 | 0.23 | 0.012  | 0.12   | NA |
| chr20 | 30605744 | 30605970 | C20orf160    | ENSG00000101331 | -1164 | 0.78 | 0.33 | 0.012  | 0.44   | NA |
| chr20 | 43150299 | 43150779 | SERINC3      | ENSG00000132824 | 112   | 0.3  | 0.2  | 0.013  | 0.1    | NA |
| chr20 | 55926212 | 55926585 | RAE1         | ENSG00000101146 | 119   | 0.33 | 0.16 | 0.013  | 0.17   | NA |
| chr20 | 42219516 | 42219988 | IFT52        | ENSG00000101052 | 181   | 0.34 | 0.16 | 0.014  | 0.18   | NA |
| chr20 | 46413742 | 46415507 | SULF2        | ENSG00000196562 | -391  | 0.23 | 0.3  | 0.015  | -0.072 | NA |
| chr20 | 59826977 | 59828978 | CDH4         | ENSG00000179242 | 418   | 0.22 | 0.17 | 0.016  | 0.054  | NA |
| chr20 | 633541   | 634330   | SRXN1        | ENSG00000172070 | 79    | 0.22 | 0.15 | 0.018  | 0.07   | NA |
| chr20 | 32399262 | 32399550 | CHMP4B       | ENSG00000101421 | 296   | 0.3  | 0.19 | 0.018  | 0.12   | NA |
| chr20 | 45317691 | 45318458 | TP53RK       | ENSG00000172315 | 5     | 0.21 | 0.31 | 0.018  | -0.096 | NA |
| chr20 | 49547068 | 49547516 | ADNP         | ENSG00000101126 | 235   | 0.23 | 0.13 | 0.018  | 0.098  | NA |
| chr20 | 18485170 | 18485580 | RPS19P1      | ENSG00000214612 | 98    | 0.44 | 0.63 | 0.019  | -0.2   | NA |
| chr20 | 33680438 | 33681029 | TRPC4AP      | ENSG00000100991 | -123  | 0.4  | 0.22 | 0.019  | 0.19   | NA |
| chr20 | 30457907 | 30458712 | DUSP15       | ENSG00000149599 | -305  | 0.24 | 0.35 | 0.02   | -0.11  | NA |
| chr20 | 32950984 | 32951969 | ITCH         | ENSG00000078747 | 435   | 0.24 | 0.17 | 0.02   | 0.065  | NA |
| chr20 | 34359673 | 34360250 | PHF20        | ENSG00000025293 | 65    | 0.22 | 0.14 | 0.02   | 0.079  | NA |
| chr20 | 61884644 | 61886387 | NKAIN4       | ENSG00000101198 | -726  | 0.25 | 0.19 | 0.02   | 0.063  | NA |
| chr20 | 3800761  | 3801546  | C20orf29     | ENSG00000125843 | -25   | 0.29 | 0.17 | 0.021  | 0.12   | NA |

|       |          |          |                |                 |       |      |      |       |        |    |
|-------|----------|----------|----------------|-----------------|-------|------|------|-------|--------|----|
| chr20 | 35579337 | 35580451 | SAMHD1         | ENSG00000101347 | 217   | 0.17 | 0.26 | 0.024 | -0.084 | NA |
| chr20 | 48769945 | 48770709 | TMEM189-UBE2V1 | ENSG00000124208 | -153  | 0.22 | 0.15 | 0.024 | 0.073  | NA |
| chr20 | 4129482  | 4130412  | SMOX           | ENSG00000088826 | 365   | 0.24 | 0.18 | 0.026 | 0.061  | NA |
| chr20 | 22567453 | 22567880 | FOXA2          | ENSG00000125798 | -1573 | 0.36 | 0.18 | 0.026 | 0.18   | NA |
| chr20 | 39765229 | 39766832 | PLCG1          | ENSG00000124181 | 430   | 0.21 | 0.15 | 0.026 | 0.067  | NA |
| chr20 | 60961570 | 60962753 | RPS21          | ENSG00000171858 | 56    | 0.25 | 0.16 | 0.027 | 0.092  | NA |
| chr20 | 39657061 | 39658412 | TOP1           | ENSG00000198900 | 278   | 0.25 | 0.19 | 0.028 | 0.061  | NA |
| chr20 | 30539523 | 30539959 | PDRG1          | ENSG00000088356 | 154   | 0.26 | 0.17 | 0.029 | 0.093  | NA |
| chr20 | 61150437 | 61150646 | C20orf166      | ENSG00000174407 | -227  | 0.94 | 0.81 | 0.029 | 0.13   | NA |
| chr20 | 36012595 | 36013439 | SRC            | ENSG00000197122 | 291   | 0.22 | 0.14 | 0.03  | 0.087  | NA |
| chr20 | 982652   | 983252   | RSPO4          | ENSG00000101282 | -48   | 0.27 | 0.18 | 0.031 | 0.092  | NA |
| chr20 | 13619285 | 13619770 | TASP1          | ENSG00000089123 | 23    | 0.37 | 0.2  | 0.031 | 0.17   | NA |
| chr20 | 61435828 | 61437150 | OGFR           | ENSG00000060491 | 302   | 0.28 | 0.21 | 0.031 | 0.073  | NA |
| chr20 | 6032675  | 6033517  | LRRN4          | ENSG00000125872 | 1599  | 0.29 | 0.22 | 0.032 | 0.072  | NA |
| chr20 | 21086139 | 21087175 | NCRNA00237     | ENSG00000225127 | 318   | 0.26 | 0.16 | 0.032 | 0.095  | NA |
| chr20 | 33734567 | 33735280 | EDEM2          | ENSG00000088298 | 218   | 0.19 | 0.29 | 0.032 | -0.11  | NA |
| chr20 | 34893891 | 34895214 | DLGAP4         | ENSG00000080845 | 294   | 0.21 | 0.15 | 0.032 | 0.065  | NA |
| chr20 | 36031537 | 36031810 | SRC            | ENSG00000197122 | 957   | 0.89 | 0.97 | 0.032 | -0.079 | NA |
| chr20 | 62688551 | 62688878 | TCEA2          | ENSG00000171703 | 68    | 0.85 | 0.57 | 0.032 | 0.28   | NA |
| chr20 | 48429172 | 48429645 | SLC9A8         | ENSG00000197818 | 158   | 0.19 | 0.34 | 0.033 | -0.15  | NA |
| chr20 | 62203871 | 62204579 | RP4-697K14.7   | ENSG00000130589 | -417  | 0.85 | 0.92 | 0.033 | -0.07  | NA |
| chr20 | 33412857 | 33413602 | NCOA6          | ENSG00000198646 | 204   | 0.25 | 0.17 | 0.034 | 0.076  | NA |
| chr20 | 34188719 | 34190267 | FER1L4         | ENSG00000088340 | -797  | 0.41 | 0.32 | 0.035 | 0.097  | NA |
| chr20 | 49574816 | 49576287 | DPM1           | ENSG00000000419 | -493  | 0.38 | 0.29 | 0.035 | 0.088  | NA |
| chr20 | 30945647 | 30947033 | ASXL1          | ENSG00000171456 | 193   | 0.3  | 0.21 | 0.037 | 0.089  | NA |
| chr20 | 60794179 | 60796121 | HRH3           | ENSG00000101180 | 161   | 0.33 | 0.26 | 0.039 | 0.079  | NA |
| chr20 | 34680003 | 34681001 | EPB41L1        | ENSG00000088367 | -100  | 0.15 | 0.22 | 0.041 | -0.065 | NA |
| chr20 | 35401825 | 35402457 | DSN1           | ENSG00000149636 | -18   | 0.17 | 0.12 | 0.041 | 0.055  | NA |
| chr20 | 43940306 | 43941111 | RBPJL          | ENSG00000124232 | -1967 | 0.68 | 0.53 | 0.041 | 0.15   | NA |
| chr20 | 58179808 | 58180787 | PHACTR3        | ENSG00000087495 | 694   | 0.33 | 0.22 | 0.042 | 0.11   | NA |

|       |          |          |               |                 |       |      |      |       |        |    |
|-------|----------|----------|---------------|-----------------|-------|------|------|-------|--------|----|
| chr20 | 590222   | 591222   | TCF15         | ENSG00000125878 | 320   | 0.23 | 0.16 | 0.043 | 0.069  | NA |
| chr20 | 49411401 | 49412142 | BCAS4         | ENSG00000124243 | 340   | 0.37 | 0.25 | 0.043 | 0.12   | NA |
| chr20 | 3026277  | 3027468  | MRPS26        | ENSG00000125901 | 281   | 0.19 | 0.14 | 0.044 | 0.054  | NA |
| chr20 | 61806254 | 61810867 | MIR124-3      | ENSG00000207598 | -1292 | 0.25 | 0.21 | 0.046 | 0.039  | NA |
| chr20 | 20344400 | 20350605 | INSM1         | ENSG00000173404 | -1263 | 0.5  | 0.46 | 0.048 | 0.039  | NA |
| chr20 | 62185073 | 62185572 | C20orf195     | ENSG00000125531 | -174  | 0.29 | 0.54 | 0.048 | -0.25  | NA |
| chr20 | 57415135 | 57417153 | GNAS          | ENSG00000087460 | 745   | 0.42 | 0.48 | 0.052 | -0.054 | NA |
| chr20 | 62200085 | 62200320 | RP4-697K14.12 | ENSG00000241624 | -244  | 0.8  | 0.92 | 0.052 | -0.12  | NA |
| chr20 | 35807409 | 35808043 | RPN2          | ENSG00000118705 | 277   | 0.3  | 0.21 | 0.053 | 0.086  | NA |
| chr20 | 62151045 | 62152847 | PPDPF         | ENSG00000125534 | -131  | 0.27 | 0.21 | 0.054 | 0.055  | NA |
| chr20 | 25061761 | 25062928 | VSX1          | ENSG00000100987 | 423   | 0.37 | 0.44 | 0.055 | -0.067 | NA |
| chr20 | 31330957 | 31331410 | COMMD7        | ENSG00000149600 | 620   | 0.23 | 0.14 | 0.055 | 0.085  | NA |
| chr20 | 60717598 | 60719667 | PSMA7         | ENSG00000101182 | -980  | 0.24 | 0.2  | 0.056 | 0.044  | NA |
| chr20 | 1446936  | 1447729  | NSFL1C        | ENSG00000088833 | 135   | 0.17 | 0.29 | 0.057 | -0.12  | NA |
| chr20 | 18117962 | 18118989 | AL050321.1    | ENSG00000232838 | -24   | 0.22 | 0.16 | 0.058 | 0.058  | NA |
| chr20 | 61447685 | 61448891 | COL9A3        | ENSG00000092758 | -126  | 0.29 | 0.24 | 0.058 | 0.054  | NA |
| chr20 | 44044652 | 44045147 | PIGT          | ENSG00000124155 | 192   | 0.19 | 0.28 | 0.059 | -0.084 | NA |
| chr20 | 36531143 | 36532133 | VSTM2L        | ENSG00000132821 | 139   | 0.29 | 0.38 | 0.06  | -0.093 | NA |
| chr20 | 44642094 | 44642406 | MMP9          | ENSG00000100985 | 1696  | 0.3  | 0.51 | 0.063 | -0.22  | NA |
| chr20 | 45142000 | 45142337 | ZNF334        | ENSG00000198185 | 25    | 0.47 | 0.24 | 0.063 | 0.24   | NA |
| chr20 | 62200652 | 62200953 | RP4-697K14.12 | ENSG00000241624 | -844  | 0.24 | 0.39 | 0.064 | -0.15  | NA |
| chr20 | 33814545 | 33815131 | MMP24         | ENSG00000125966 | 296   | 0.28 | 0.18 | 0.065 | 0.1    | NA |
| chr20 | 39316039 | 39316322 | MAFB          | ENSG00000204103 | 1318  | 0.24 | 0.37 | 0.065 | -0.13  | NA |
| chr20 | 17550330 | 17551317 | DSTN          | ENSG00000125868 | 315   | 0.28 | 0.2  | 0.067 | 0.079  | NA |
| chr20 | 34042854 | 34043585 | CEP250        | ENSG00000126001 | 234   | 0.26 | 0.17 | 0.067 | 0.084  | NA |
| chr20 | 61456339 | 61456565 | COL9A3        | ENSG00000092758 | 678   | 0.14 | 1    | 0.067 | -0.86  | NA |
| chr20 | 43538616 | 43539060 | PABPC1L       | ENSG00000101104 | 135   | 0.29 | 0.2  | 0.068 | 0.098  | NA |
| chr20 | 56283891 | 56285395 | PMEPA1        | ENSG00000124225 | 173   | 0.29 | 0.23 | 0.069 | 0.061  | NA |
| chr20 | 17549628 | 17550051 | BFSP1         | ENSG00000125864 | 26    | 0.29 | 0.15 | 0.071 | 0.14   | NA |
| chr20 | 35201323 | 35203490 | RP5-977B1.7   | ENSG00000232907 | -1019 | 0.32 | 0.27 | 0.072 | 0.049  | NA |

|       |          |          |                |                 |      |      |      |       |        |    |
|-------|----------|----------|----------------|-----------------|------|------|------|-------|--------|----|
| chr20 | 61877854 | 61878071 | NKAIN4         | ENSG00000101198 | 541  | 0.78 | 0.87 | 0.072 | -0.094 | NA |
| chr20 | 2187532  | 2188576  | RP11-128M1.1   | ENSG00000226644 | 191  | 0.17 | 0.23 | 0.073 | -0.062 | NA |
| chr20 | 32254811 | 32255989 | NECAB3         | ENSG00000125967 | -935 | 0.2  | 0.15 | 0.073 | 0.049  | NA |
| chr20 | 33104112 | 33104543 | DYNLRB1        | ENSG00000125971 | 113  | 0.3  | 0.17 | 0.074 | 0.12   | NA |
| chr20 | 53091733 | 53092993 | DOK5           | ENSG00000101134 | 227  | 0.31 | 0.21 | 0.074 | 0.092  | NA |
| chr20 | 44640288 | 44641210 | MMP9           | ENSG00000100985 | 195  | 0.5  | 0.42 | 0.075 | 0.083  | NA |
| chr20 | 32699257 | 32700281 | EIF2S2         | ENSG00000125977 | 369  | 0.29 | 0.22 | 0.076 | 0.076  | NA |
| chr20 | 24972665 | 24973700 | C20orf3        | ENSG00000101474 | 96   | 0.21 | 0.16 | 0.082 | 0.056  | NA |
| chr20 | 45034723 | 45035418 | ELMO2          | ENSG00000062598 | 128  | 0.22 | 0.15 | 0.083 | 0.072  | NA |
| chr20 | 5930962  | 5931623  | TRMT6          | ENSG00000089195 | -241 | 0.32 | 0.18 | 0.086 | 0.14   | NA |
| chr20 | 61870781 | 61871178 | BIRC7          | ENSG00000101197 | 1425 | 0.65 | 0.8  | 0.088 | -0.15  | NA |
| chr20 | 37063525 | 37064106 | RP4-564F22.2   | ENSG00000196756 | 101  | 0.21 | 0.14 | 0.089 | 0.062  | NA |
| chr20 | 44651066 | 44651369 | RP11-465L10.10 | ENSG00000204044 | -505 | 0.38 | 0.21 | 0.092 | 0.18   | NA |
| chr20 | 62612300 | 62612787 | PRPF6          | ENSG00000101161 | 55   | 0.18 | 0.26 | 0.092 | -0.078 | NA |
| chr20 | 33146135 | 33147318 | MAP1LC3A       | ENSG00000101460 | 204  | 0.26 | 0.21 | 0.096 | 0.045  | NA |
| chr20 | 37352130 | 37357372 | SLC32A1        | ENSG00000101438 | 1646 | 0.25 | 0.22 | 0.096 | 0.034  | NA |
| chr20 | 62669304 | 62670730 | NCRNA00176     | ENSG00000196421 | 532  | 0.2  | 0.25 | 0.097 | -0.044 | NA |
| chr20 | 62586919 | 62588218 | UCKL1          | ENSG00000198276 | 126  | 0.25 | 0.19 | 0.098 | 0.057  | NA |
| chr20 | 37274691 | 37275134 | ARHGAP40       | ENSG00000124143 | -794 | 0.21 | 0.5  | 0.099 | -0.29  | NA |
| chr20 | 47894197 | 47895199 | ZNFX1          | ENSG00000124201 | -120 | 0.25 | 0.19 | 0.1   | 0.062  | NA |
| chr20 | 58507755 | 58509517 | SYCP2          | ENSG00000196074 | -220 | 0.62 | 0.57 | 0.1   | 0.056  | NA |
| chr20 | 2732746  | 2733630  | EBF4           | ENSG00000088881 | 424  | 0.23 | 0.17 | 0.11  | 0.06   | NA |
| chr20 | 23028403 | 23032218 | THBD           | ENSG00000178726 | 26   | 0.23 | 0.26 | 0.11  | -0.031 | NA |
| chr20 | 61636171 | 61639055 | BHLHE23        | ENSG00000125533 | 774  | 0.23 | 0.26 | 0.11  | -0.036 | NA |
| chr20 | 62737382 | 62738071 | NPBWR2         | ENSG00000125522 | 798  | 0.9  | 1    | 0.11  | -0.1   | NA |
| chr20 | 10414276 | 10414993 | MKKS           | ENSG00000125863 | 236  | 0.23 | 0.39 | 0.12  | -0.16  | NA |
| chr20 | 17209418 | 17209622 | PCSK2          | ENSG00000125851 | 744  | 0.31 | 0.12 | 0.12  | 0.19   | NA |
| chr20 | 19997704 | 19998559 | NAA20          | ENSG00000173418 | 371  | 0.26 | 0.19 | 0.12  | 0.071  | NA |
| chr20 | 30192006 | 30192273 | ID1            | ENSG00000125968 | -947 | 0.12 | 0.2  | 0.12  | -0.086 | NA |
| chr20 | 40246345 | 40247841 | CHD6           | ENSG00000124177 | -79  | 0.28 | 0.22 | 0.12  | 0.055  | NA |

|       |          |          |               |                 |       |      |      |      |        |    |
|-------|----------|----------|---------------|-----------------|-------|------|------|------|--------|----|
| chr20 | 43729515 | 43729791 | KCNS1         | ENSG00000124134 | 97    | 0.29 | 0.4  | 0.12 | -0.11  | NA |
| chr20 | 44462383 | 44463169 | TNNC2         | ENSG00000101470 | -392  | 0.27 | 0.21 | 0.12 | 0.062  | NA |
| chr20 | 3211390  | 3211622  | SLC4A11       | ENSG00000088836 | -300  | 0.82 | 1    | 0.13 | -0.18  | NA |
| chr20 | 25990391 | 25990741 | RP4-760C5.3   | ENSG00000231081 | 601   | 0.21 | 0.35 | 0.13 | -0.15  | NA |
| chr20 | 30639908 | 30640786 | HCK           | ENSG00000101336 | 356   | 0.17 | 0.23 | 0.13 | -0.062 | NA |
| chr20 | 42839134 | 42839883 | C20orf111     | ENSG00000132823 | -77   | 0.2  | 0.14 | 0.13 | 0.063  | NA |
| chr20 | 47804353 | 47805160 | STAU1         | ENSG00000124214 | 148   | 0.23 | 0.17 | 0.13 | 0.057  | NA |
| chr20 | 10200088 | 10200384 | RP5-839B4.7   | ENSG00000227906 | -82   | 0.27 | 0.17 | 0.14 | 0.11   | NA |
| chr20 | 24449844 | 24452037 | TMEM90B       | ENSG00000101463 | 1105  | 0.22 | 0.17 | 0.14 | 0.051  | NA |
| chr20 | 34541602 | 34543012 | SCAND1        | ENSG00000171222 | 241   | 0.25 | 0.21 | 0.14 | 0.038  | NA |
| chr20 | 49126617 | 49127435 | PTPN1         | ENSG00000196396 | 135   | 0.31 | 0.25 | 0.14 | 0.064  | NA |
| chr20 | 2644561  | 2644901  | IDH3B         | ENSG00000101365 | 103   | 0.21 | 0.31 | 0.15 | -0.1   | NA |
| chr20 | 33464156 | 33464645 | ACSS2         | ENSG00000131069 | 162   | 0.23 | 0.31 | 0.15 | -0.082 | NA |
| chr20 | 35491001 | 35492805 | KIAA0889      | ENSG00000149639 | 186   | 0.29 | 0.24 | 0.15 | 0.051  | NA |
| chr20 | 62610126 | 62611163 | SAMD10        | ENSG00000130590 | 351   | 0.23 | 0.17 | 0.15 | 0.054  | NA |
| chr20 | 3190011  | 3190562  | ITPA          | ENSG00000125877 | 230   | 0.24 | 0.18 | 0.16 | 0.06   | NA |
| chr20 | 46579791 | 46580167 | RP11-347D21.1 | ENSG00000234967 | 436   | 1    | 0.96 | 0.16 | 0.039  | NA |
| chr20 | 57428308 | 57428516 | GNAS          | ENSG00000087460 | 94    | 0.85 | 0.92 | 0.16 | -0.077 | NA |
| chr20 | 61640480 | 61641168 | AL121673.1    | ENSG00000203905 | 89    | 0.24 | 0.3  | 0.16 | -0.064 | NA |
| chr20 | 21686199 | 21687689 | PAX1          | ENSG00000125813 | 647   | 0.2  | 0.25 | 0.17 | -0.048 | NA |
| chr20 | 23969149 | 23969433 | GGTLC1        | ENSG00000149435 | 125   | 0.89 | 0.98 | 0.17 | -0.085 | NA |
| chr20 | 35974177 | 35974913 | SRC           | ENSG00000197122 | 7     | 0.3  | 0.22 | 0.17 | 0.081  | NA |
| chr20 | 47662732 | 47663449 | CSE1L         | ENSG00000124207 | 252   | 0.17 | 0.25 | 0.17 | -0.09  | NA |
| chr20 | 49626063 | 49626843 | RP5-955M13.3  | ENSG00000248832 | -1876 | 0.94 | 0.91 | 0.17 | 0.031  | NA |
| chr20 | 57599202 | 57599408 | AL109840.1    | ENSG00000221482 | -260  | 0.96 | 1    | 0.17 | -0.035 | NA |
| chr20 | 5296266  | 5297798  | PROKR2        | ENSG00000101292 | 346   | 0.22 | 0.19 | 0.18 | 0.036  | NA |
| chr20 | 17948755 | 17949921 | SNX5          | ENSG00000089006 | -237  | 0.2  | 0.27 | 0.18 | -0.065 | NA |
| chr20 | 31989144 | 31989418 | CDK5RAP1      | ENSG00000101391 | -23   | 0.13 | 0.19 | 0.18 | -0.054 | NA |
| chr20 | 35233829 | 35234782 | C20orf24      | ENSG00000101084 | 168   | 0.19 | 0.15 | 0.18 | 0.039  | NA |
| chr20 | 44034458 | 44035954 | TP53TG5       | ENSG00000124251 | -572  | 0.22 | 0.18 | 0.18 | 0.039  | NA |

|       |          |          |              |                 |      |      |      |      |        |    |
|-------|----------|----------|--------------|-----------------|------|------|------|------|--------|----|
| chr20 | 48184193 | 48184833 | PTGIS        | ENSG00000124212 | 140  | 0.3  | 0.23 | 0.18 | 0.078  | NA |
| chr20 | 62168432 | 62168684 | PTK6         | ENSG00000101213 | 137  | 0.82 | 0.97 | 0.18 | -0.14  | NA |
| chr20 | 25037707 | 25039211 | ACSS1        | ENSG00000154930 | 359  | 0.19 | 0.24 | 0.19 | -0.047 | NA |
| chr20 | 62127243 | 62127735 | EEF1A2       | ENSG00000101210 | 1698 | 0.3  | 0.37 | 0.19 | -0.068 | NA |
| chr20 | 30795282 | 30795841 | PLAGL2       | ENSG00000126003 | 33   | 0.25 | 0.15 | 0.2  | 0.097  | NA |
| chr20 | 47013682 | 47013970 | RP1-66N13.1  | ENSG00000236874 | -188 | 0.9  | 0.82 | 0.2  | 0.077  | NA |
| chr20 | 61287997 | 61288480 | SLCO4A1      | ENSG00000101187 | 431  | 0.9  | 1    | 0.2  | -0.1   | NA |
| chr20 | 1373259  | 1373917  | FKBP1A       | ENSG00000088832 | 18   | 0.35 | 0.21 | 0.21 | 0.14   | NA |
| chr20 | 3184874  | 3185385  | DDRKG1       | ENSG00000198171 | 174  | 0.28 | 0.21 | 0.21 | 0.077  | NA |
| chr20 | 44657463 | 44659243 | SLC12A5      | ENSG00000124140 | 518  | 0.27 | 0.32 | 0.21 | -0.048 | NA |
| chr20 | 55043375 | 55043766 | C20orf43     | ENSG00000022277 | -77  | 0.43 | 0.27 | 0.21 | 0.17   | NA |
| chr20 | 61273277 | 61274917 | SLCO4A1      | ENSG00000101187 | 300  | 0.19 | 0.22 | 0.21 | -0.033 | NA |
| chr20 | 62205585 | 62205887 | RP4-697K14.7 | ENSG00000130589 | -144 | 0.23 | 0.41 | 0.21 | -0.18  | NA |
| chr20 | 62714763 | 62715761 | C20orf201    | ENSG00000171695 | 450  | 0.31 | 0.25 | 0.21 | 0.059  | NA |
| chr20 | 21689758 | 21690048 | PAX1         | ENSG00000125813 | 995  | 0.33 | 0.17 | 0.22 | 0.17   | NA |
| chr20 | 30311065 | 30311872 | BCL2L1       | ENSG00000171552 | 235  | 0.23 | 0.19 | 0.22 | 0.041  | NA |
| chr20 | 32319505 | 32320554 | RP4-553F4.2  | ENSG00000229188 | -395 | 0.24 | 0.19 | 0.22 | 0.046  | NA |
| chr20 | 37230523 | 37230742 | ARHGAP40     | ENSG00000124143 | 55   | 0.43 | 0.25 | 0.22 | 0.18   | NA |
| chr20 | 814120   | 814755   | FAM110A      | ENSG00000125898 | 79   | 0.37 | 0.28 | 0.23 | 0.086  | NA |
| chr20 | 43991615 | 43992376 | SYS1         | ENSG00000204070 | 327  | 0.22 | 0.15 | 0.23 | 0.065  | NA |
| chr20 | 34329490 | 34330563 | RBM39        | ENSG00000131051 | -506 | 0.23 | 0.17 | 0.24 | 0.055  | NA |
| chr20 | 271055   | 271437   | C20orf96     | ENSG00000196476 | -176 | 0.22 | 0.13 | 0.25 | 0.089  | NA |
| chr20 | 3451291  | 3452231  | ATRN         | ENSG00000088812 | 74   | 0.17 | 0.14 | 0.25 | 0.03   | NA |
| chr20 | 32378837 | 32379191 | RP4-553F4.6  | ENSG00000230753 | 1819 | 1    | 0.96 | 0.25 | 0.044  | NA |
| chr20 | 21283636 | 21284446 | XRN2         | ENSG00000088930 | 99   | 0.24 | 0.19 | 0.26 | 0.043  | NA |
| chr20 | 48806598 | 48809022 | CEBPB        | ENSG00000172216 | 434  | 0.21 | 0.18 | 0.26 | 0.023  | NA |
| chr20 | 60982405 | 60982780 | CABLES2      | ENSG00000149679 | -251 | 0.25 | 0.2  | 0.26 | 0.055  | NA |
| chr20 | 18268544 | 18269405 | ZNF133       | ENSG00000125846 | -147 | 0.35 | 0.22 | 0.27 | 0.13   | NA |
| chr20 | 42875764 | 42876184 | GDAP1L1      | ENSG00000124194 | 87   | 0.22 | 0.16 | 0.27 | 0.058  | NA |
| chr20 | 61951346 | 61951549 | COL20A1      | ENSG00000101203 | -4   | 0.96 | 0.93 | 0.27 | 0.038  | NA |

|       |          |          |               |                 |       |      |      |      |        |    |
|-------|----------|----------|---------------|-----------------|-------|------|------|------|--------|----|
| chr20 | 62525796 | 62526638 | DNAJC5        | ENSG00000101152 | -301  | 0.2  | 0.25 | 0.27 | -0.052 | NA |
| chr20 | 33543082 | 33543846 | GSS           | ENSG00000100983 | 156   | 0.29 | 0.23 | 0.28 | 0.06   | NA |
| chr20 | 34286821 | 34287701 | NFS1          | ENSG00000244005 | -150  | 0.18 | 0.15 | 0.28 | 0.032  | NA |
| chr20 | 61917499 | 61917768 | ARFGAP1       | ENSG00000101199 | 491   | 0.97 | 0.91 | 0.28 | 0.061  | NA |
| chr20 | 10152768 | 10153193 | RP11-416N4.4  | ENSG00000230506 | -1188 | 0.44 | 0.26 | 0.29 | 0.18   | NA |
| chr20 | 43104406 | 43104654 | TTPAL         | ENSG00000124120 | 4     | 0.22 | 0.15 | 0.29 | 0.071  | NA |
| chr20 | 25603815 | 25605187 | RP4-694B14.5  | ENSG00000213742 | -180  | 0.23 | 0.27 | 0.3  | -0.039 | NA |
| chr20 | 43588720 | 43589230 | TOMM34        | ENSG00000025772 | 152   | 0.25 | 0.2  | 0.3  | 0.043  | NA |
| chr20 | 61557027 | 61558214 | DIDO1         | ENSG00000101191 | 201   | 0.21 | 0.18 | 0.3  | 0.027  | NA |
| chr20 | 32031042 | 32031964 | SNTA1         | ENSG00000101400 | 195   | 0.17 | 0.2  | 0.31 | -0.036 | NA |
| chr20 | 44639135 | 44639988 | MMP9          | ENSG00000100985 | -993  | 0.31 | 0.35 | 0.31 | -0.048 | NA |
| chr20 | 52209590 | 52211360 | ZNF217        | ENSG00000171940 | -97   | 0.31 | 0.26 | 0.31 | 0.048  | NA |
| chr20 | 62693942 | 62695282 | TCEA2         | ENSG00000171703 | 115   | 0.18 | 0.16 | 0.31 | 0.029  | NA |
| chr20 | 23401108 | 23402294 | NAPB          | ENSG00000125814 | 350   | 0.24 | 0.19 | 0.32 | 0.05   | NA |
| chr20 | 33879904 | 33880215 | FAM83C        | ENSG00000125998 | 145   | 0.78 | 0.68 | 0.32 | 0.1    | NA |
| chr20 | 49548194 | 49548525 | ADNP          | ENSG00000101126 | -609  | 0.43 | 0.1  | 0.32 | 0.33   | NA |
| chr20 | 60885967 | 60886180 | LAMA5         | ENSG00000130702 | -605  | 0.16 | 0.27 | 0.32 | -0.11  | NA |
| chr20 | 48552705 | 48553534 | RNF114        | ENSG00000124226 | 174   | 0.22 | 0.16 | 0.33 | 0.057  | NA |
| chr20 | 61927194 | 61927482 | COL20A1       | ENSG00000101203 | 946   | 0.59 | 0.53 | 0.33 | 0.06   | NA |
| chr20 | 62710769 | 62711745 | RGS19         | ENSG00000171700 | -479  | 0.21 | 0.17 | 0.33 | 0.042  | NA |
| chr20 | 23336868 | 23337201 | RP3-322G13.5  | ENSG00000232645 | 1458  | 0.6  | 0.68 | 0.34 | -0.078 | NA |
| chr20 | 61455418 | 61455747 | COL9A3        | ENSG00000092758 | -192  | 0.82 | 0.93 | 0.34 | -0.11  | NA |
| chr20 | 43374349 | 43374890 | KCNK15        | ENSG00000124249 | 198   | 0.2  | 0.23 | 0.35 | -0.034 | NA |
| chr20 | 57414595 | 57414896 | GNAS          | ENSG00000087460 | -28   | 0.44 | 0.51 | 0.36 | -0.069 | NA |
| chr20 | 62439107 | 62439833 | RP4-583P15.11 | ENSG00000231208 | 41    | 1    | 0.97 | 0.36 | 0.026  | NA |
| chr20 | 30192854 | 30194025 | ID1           | ENSG00000125968 | 353   | 0.21 | 0.17 | 0.37 | 0.038  | NA |
| chr20 | 60696561 | 60698342 | LSM14B        | ENSG00000149657 | -66   | 0.22 | 0.19 | 0.37 | 0.027  | NA |
| chr20 | 9495253  | 9495597  | C20orf103     | ENSG00000125869 | 154   | 0.18 | 0.13 | 0.38 | 0.045  | NA |
| chr20 | 44642605 | 44643111 | AL162458.1    | ENSG00000203346 | -1253 | 0.2  | 0.27 | 0.38 | -0.067 | NA |
| chr20 | 4152866  | 4153398  | SMOX          | ENSG00000088826 | 775   | 0.18 | 0.24 | 0.39 | -0.058 | NA |

|       |          |          |               |                 |      |      |      |      |        |    |
|-------|----------|----------|---------------|-----------------|------|------|------|------|--------|----|
| chr20 | 50178960 | 50179675 | NFATC2        | ENSG00000101096 | -149 | 0.26 | 0.32 | 0.39 | -0.064 | NA |
| chr20 | 23015716 | 23016879 | SSTR4         | ENSG00000132671 | 240  | 0.49 | 0.45 | 0.4  | 0.038  | NA |
| chr20 | 43514595 | 43514885 | YWHAB         | ENSG00000166913 | 347  | 0.21 | 0.14 | 0.4  | 0.072  | NA |
| chr20 | 44518897 | 44520361 | NEURL2        | ENSG00000124257 | -514 | 0.22 | 0.2  | 0.4  | 0.021  | NA |
| chr20 | 61467585 | 61468124 | COL9A3        | ENSG00000092758 | 83   | 0.9  | 0.86 | 0.4  | 0.035  | NA |
| chr20 | 30606492 | 30607174 | C20orf160     | ENSG00000101331 | -188 | 0.2  | 0.17 | 0.41 | 0.033  | NA |
| chr20 | 37075227 | 37075854 | SNHG11        | ENSG00000174365 | 243  | 0.2  | 0.25 | 0.41 | -0.049 | NA |
| chr20 | 54967036 | 54968001 | AURKA         | ENSG00000087586 | -331 | 0.17 | 0.2  | 0.41 | -0.033 | NA |
| chr20 | 62681074 | 62681332 | TCEA2         | ENSG00000171703 | 14   | 0.3  | 0.36 | 0.41 | -0.067 | NA |
| chr20 | 33264666 | 33265193 | PIGU          | ENSG00000101464 | -40  | 0.27 | 0.13 | 0.42 | 0.14   | NA |
| chr20 | 47538163 | 47538672 | ARFGEF2       | ENSG00000124198 | 142  | 0.29 | 0.22 | 0.42 | 0.074  | NA |
| chr20 | 16553836 | 16554260 | KIF16B        | ENSG00000089177 | 30   | 0.18 | 0.15 | 0.43 | 0.037  | NA |
| chr20 | 37376621 | 37377430 | ACTR5         | ENSG00000101442 | -60  | 0.2  | 0.16 | 0.43 | 0.038  | NA |
| chr20 | 57607045 | 57607782 | ATP5E         | ENSG00000124172 | -66  | 0.16 | 0.18 | 0.43 | -0.024 | NA |
| chr20 | 60639272 | 60639835 | TAF4          | ENSG00000130699 | 1290 | 0.31 | 0.25 | 0.43 | 0.058  | NA |
| chr20 | 62461266 | 62462037 | ZBTB46        | ENSG00000130584 | 916  | 0.18 | 0.24 | 0.43 | -0.062 | NA |
| chr20 | 33865767 | 33866091 | MT1P3         | ENSG00000126005 | -99  | 0.29 | 0.23 | 0.44 | 0.067  | NA |
| chr20 | 62571738 | 62572556 | MIR1914       | ENSG00000223010 | 750  | 0.96 | 0.94 | 0.44 | 0.018  | NA |
| chr20 | 16710507 | 16711115 | SNRPB2        | ENSG00000125870 | 205  | 0.21 | 0.14 | 0.45 | 0.067  | NA |
| chr20 | 51589707 | 51590020 | TSHZ2         | ENSG00000182463 | 917  | 0.44 | 0.32 | 0.45 | 0.12   | NA |
| chr20 | 60757609 | 60758378 | GTPBP5        | ENSG00000101181 | -92  | 0.24 | 0.21 | 0.45 | 0.031  | NA |
| chr20 | 32251123 | 32251832 | NECAB3        | ENSG00000125967 | 48   | 0.17 | 0.15 | 0.46 | 0.027  | NA |
| chr20 | 42939450 | 42940043 | FITM2         | ENSG00000197296 | 63   | 0.16 | 0.2  | 0.46 | -0.038 | NA |
| chr20 | 43160339 | 43160817 | PKIG          | ENSG00000168734 | 152  | 0.26 | 0.3  | 0.46 | -0.048 | NA |
| chr20 | 18488084 | 18488804 | SEC23B        | ENSG00000101310 | 307  | 0.19 | 0.15 | 0.47 | 0.034  | NA |
| chr20 | 61339858 | 61341220 | NTSR1         | ENSG00000101188 | 350  | 0.26 | 0.23 | 0.47 | 0.035  | NA |
| chr20 | 8112884  | 8113592  | PLCB1         | ENSG00000182621 | -34  | 0.18 | 0.23 | 0.48 | -0.042 | NA |
| chr20 | 32580799 | 32582502 | RP5-1125A11.1 | ENSG00000228265 | -720 | 0.22 | 0.25 | 0.48 | -0.035 | NA |
| chr20 | 48329645 | 48330682 | B4GALT5       | ENSG00000158470 | 252  | 0.23 | 0.21 | 0.48 | 0.022  | NA |
| chr20 | 56963998 | 56964804 | VAPB          | ENSG00000124164 | 223  | 0.17 | 0.21 | 0.48 | -0.03  | NA |



|       |          |          |              |                 |       |      |      |      |        |    |
|-------|----------|----------|--------------|-----------------|-------|------|------|------|--------|----|
| chr20 | 30865547 | 30865791 | KIF3B        | ENSG00000101350 | 202   | 0.08 | 0.16 | 0.5  | -0.082 | NA |
| chr20 | 44935932 | 44937310 | CDH22        | ENSG00000149654 | 516   | 0.18 | 0.2  | 0.5  | -0.026 | NA |
| chr20 | 3869453  | 3870570  | PANK2        | ENSG00000125779 | 525   | 0.15 | 0.16 | 0.51 | -0.018 | NA |
| chr20 | 5986399  | 5987297  | AL035461.1   | ENSG00000247862 | -381  | 0.22 | 0.2  | 0.51 | 0.025  | NA |
| chr20 | 7999789  | 8000499  | TMX4         | ENSG00000125827 | 149   | 0.24 | 0.19 | 0.51 | 0.045  | NA |
| chr20 | 10652573 | 10655611 | JAG1         | ENSG00000101384 | 516   | 0.28 | 0.26 | 0.51 | 0.017  | NA |
| chr20 | 44420497 | 44420868 | WFDC3        | ENSG00000124116 | -175  | 0.24 | 0.18 | 0.51 | 0.061  | NA |
| chr20 | 44539729 | 44540099 | PLTP         | ENSG00000100979 | -338  | 0.31 | 0.21 | 0.51 | 0.1    | NA |
| chr20 | 57875317 | 57876126 | EDN3         | ENSG00000124205 | 239   | 0.25 | 0.2  | 0.51 | 0.046  | NA |
| chr20 | 62317505 | 62317775 | RTEL1        | ENSG0000026036  | -84   | 0.89 | 0.93 | 0.51 | -0.045 | NA |
| chr20 | 3209045  | 3209388  | SLC4A11      | ENSG00000088836 | 1206  | 0.92 | 0.95 | 0.52 | -0.026 | NA |
| chr20 | 9496471  | 9496893  | RP5-1119D9.4 | ENSG00000225988 | -1037 | 0.27 | 0.22 | 0.52 | 0.048  | NA |
| chr20 | 45523250 | 45524020 | EYA2         | ENSG00000064655 | 372   | 0.22 | 0.18 | 0.52 | 0.039  | NA |
| chr20 | 3776618  | 3777374  | CDC25B       | ENSG00000101224 | 58    | 0.25 | 0.22 | 0.53 | 0.031  | NA |
| chr20 | 3827225  | 3828031  | MAVS         | ENSG00000088888 | 141   | 0.28 | 0.26 | 0.53 | 0.028  | NA |
| chr20 | 21083501 | 21083847 | NCRNA00237   | ENSG00000225127 | -1474 | 0.24 | 0.18 | 0.53 | 0.059  | NA |
| chr20 | 21683744 | 21684420 | AL035562.1   | ENSG00000223871 | 141   | 0.29 | 0.39 | 0.53 | -0.1   | NA |
| chr20 | 43976533 | 43977242 | SDC4         | ENSG00000124145 | 177   | 0.17 | 0.2  | 0.54 | -0.031 | NA |
| chr20 | 48531603 | 48532316 | SPATA2       | ENSG00000158480 | 86    | 0.17 | 0.15 | 0.54 | 0.019  | NA |
| chr20 | 57427691 | 57427995 | GNAS         | ENSG00000087460 | -475  | 0.43 | 0.53 | 0.54 | -0.097 | NA |
| chr20 | 25228300 | 25229402 | PYGB         | ENSG00000100994 | 146   | 0.24 | 0.22 | 0.55 | 0.02   | NA |
| chr20 | 61427668 | 61428098 | C20orf20     | ENSG00000101189 | 78    | 0.22 | 0.26 | 0.55 | -0.045 | NA |
| chr20 | 5093360  | 5094145  | C20orf30     | ENSG00000089063 | -353  | 0.29 | 0.25 | 0.56 | 0.047  | NA |
| chr20 | 17661521 | 17663456 | RRBP1        | ENSG00000125844 | 217   | 0.24 | 0.23 | 0.56 | 0.018  | NA |
| chr20 | 61492119 | 61493626 | TCFL5        | ENSG00000101190 | 243   | 0.24 | 0.23 | 0.56 | 0.019  | NA |
| chr20 | 1874933  | 1875718  | SIRPA        | ENSG00000198053 | 171   | 0.3  | 0.25 | 0.58 | 0.05   | NA |
| chr20 | 32261944 | 32262410 | NECAB3       | ENSG00000125967 | -5    | 0.21 | 0.25 | 0.58 | -0.037 | NA |
| chr20 | 34129537 | 34130038 | ERGIC3       | ENSG00000125991 | 17    | 0.18 | 0.25 | 0.58 | -0.068 | NA |
| chr20 | 56099970 | 56100250 | CTCFL        | ENSG00000124092 | 53    | 0.97 | 0.94 | 0.58 | 0.025  | NA |
| chr20 | 3748053  | 3749407  | C20orf27     | ENSG00000101220 | -365  | 0.25 | 0.26 | 0.59 | -0.016 | NA |

|       |          |          |               |                 |      |      |      |      |         |    |
|-------|----------|----------|---------------|-----------------|------|------|------|------|---------|----|
| chr20 | 6103436  | 6103970  | FERMT1        | ENSG00000101311 | -26  | 0.17 | 0.2  | 0.59 | -0.029  | NA |
| chr20 | 19192459 | 19193902 | SLC24A3       | ENSG00000185052 | -110 | 0.19 | 0.17 | 0.59 | 0.017   | NA |
| chr20 | 25176027 | 25176620 | ENTPD6        | ENSG00000197586 | -6   | 0.16 | 0.18 | 0.59 | -0.02   | NA |
| chr20 | 25565437 | 25566547 | NINL          | ENSG00000101004 | 161  | 0.22 | 0.2  | 0.59 | 0.019   | NA |
| chr20 | 44440946 | 44441655 | UBE2C         | ENSG00000175063 | 85   | 0.22 | 0.26 | 0.59 | -0.036  | NA |
| chr20 | 655880   | 656604   | SRXN1         | ENSG00000172070 | 202  | 0.21 | 0.24 | 0.6  | -0.03   | NA |
| chr20 | 50807798 | 50808825 | ZFP64         | ENSG00000020256 | -75  | 0.21 | 0.19 | 0.6  | 0.019   | NA |
| chr20 | 60926764 | 60927157 | LAMA5         | ENSG00000130702 | 85   | 0.91 | 0.87 | 0.6  | 0.042   | NA |
| chr20 | 62366249 | 62366535 | LIME1         | ENSG00000203896 | -423 | 0.93 | 0.91 | 0.6  | 0.022   | NA |
| chr20 | 61148081 | 61148990 | C20orf200     | ENSG00000174403 | 183  | 0.42 | 0.36 | 0.61 | 0.064   | NA |
| chr20 | 2451075  | 2451572  | SNRPB         | ENSG00000125835 | 55   | 0.17 | 0.15 | 0.62 | 0.029   | NA |
| chr20 | 33865333 | 33865563 | MT1P3         | ENSG00000126005 | 382  | 0.5  | 0.1  | 0.62 | 0.4     | NA |
| chr20 | 60640721 | 60641805 | TAF4          | ENSG00000130699 | -420 | 0.2  | 0.21 | 0.62 | -0.015  | NA |
| chr20 | 62374061 | 62374353 | SLC2A4RG      | ENSG00000125520 | 326  | 0.85 | 0.81 | 0.62 | 0.047   | NA |
| chr20 | 40627224 | 40628025 | RP5-1121H13.1 | ENSG00000223651 | 413  | 0.94 | 0.95 | 0.63 | -0.015  | NA |
| chr20 | 4666827  | 4667874  | PRNP          | ENSG00000171867 | 468  | 0.17 | 0.19 | 0.64 | -0.023  | NA |
| chr20 | 57617430 | 57618222 | SLMO2         | ENSG00000101166 | -39  | 0.22 | 0.24 | 0.64 | -0.021  | NA |
| chr20 | 304826   | 308323   | RP5-1103G7.4  | ENSG00000225377 | -696 | 0.18 | 0.19 | 0.65 | -0.0089 | NA |
| chr20 | 44098280 | 44099536 | WFDC2         | ENSG00000101443 | 562  | 0.32 | 0.29 | 0.65 | 0.026   | NA |
| chr20 | 49639071 | 49640212 | KCNG1         | ENSG0000026559  | -24  | 0.26 | 0.27 | 0.66 | -0.014  | NA |
| chr20 | 60775742 | 60776152 | GTPBP5        | ENSG00000101181 | -879 | 0.96 | 0.98 | 0.66 | -0.016  | NA |
| chr20 | 3713159  | 3713515  | HSPA12B       | ENSG00000132622 | 23   | 0.27 | 0.25 | 0.67 | 0.022   | NA |
| chr20 | 37554754 | 37555835 | FAM83D        | ENSG00000101447 | 339  | 0.23 | 0.21 | 0.67 | 0.021   | NA |
| chr20 | 50158904 | 50159509 | NFATC2        | ENSG00000101096 | 52   | 0.21 | 0.24 | 0.67 | -0.028  | NA |
| chr20 | 57556341 | 57556726 | TH1L          | ENSG00000101158 | 203  | 0.29 | 0.15 | 0.67 | 0.14    | NA |
| chr20 | 61426696 | 61427099 | C20orf20      | ENSG00000101189 | -908 | 0.69 | 0.78 | 0.67 | -0.091  | NA |
| chr20 | 37464502 | 37464847 | PPP1R16B      | ENSG00000101445 | -67  | 0.93 | 0.95 | 0.68 | -0.022  | NA |
| chr20 | 39994545 | 39995810 | EMILIN3       | ENSG00000183798 | 290  | 0.23 | 0.21 | 0.68 | 0.015   | NA |
| chr20 | 35917988 | 35918261 | MANBAL        | ENSG00000101363 | 83   | 0.17 | 0.19 | 0.69 | -0.025  | NA |
| chr20 | 1305899  | 1306554  | RP11-314N13.4 | ENSG00000234684 | 161  | 0.19 | 0.16 | 0.7  | 0.023   | NA |

|       |          |          |           |                 |       |      |      |      |         |    |
|-------|----------|----------|-----------|-----------------|-------|------|------|------|---------|----|
| chr20 | 34252556 | 34252927 | CPNE1     | ENSG00000214078 | 18    | 0.31 | 0.28 | 0.7  | 0.033   | NA |
| chr20 | 35060057 | 35060262 | DLGAP4    | ENSG00000080845 | 38    | 0.91 | 0.95 | 0.7  | -0.038  | NA |
| chr20 | 60877499 | 60879008 | ADRM1     | ENSG00000130706 | 201   | 0.19 | 0.2  | 0.7  | -0.0093 | NA |
| chr20 | 16555518 | 16555779 | KIF16B    | ENSG00000089177 | -1570 | 0.24 | 0.33 | 0.71 | -0.096  | NA |
| chr20 | 20692747 | 20693786 | RALGAPA2  | ENSG00000188559 | -135  | 0.2  | 0.22 | 0.71 | -0.022  | NA |
| chr20 | 36888891 | 36889442 | KIAA1755  | ENSG00000149633 | 8     | 0.57 | 0.39 | 0.71 | 0.18    | NA |
| chr20 | 42295399 | 42296320 | MYBL2     | ENSG00000101057 | 105   | 0.3  | 0.27 | 0.71 | 0.03    | NA |
| chr20 | 48598959 | 48599657 | SNAI1     | ENSG00000124216 | -228  | 0.39 | 0.43 | 0.71 | -0.038  | NA |
| chr20 | 62575724 | 62576052 | MIR647    | ENSG00000207554 | -1809 | 0.79 | 0.76 | 0.71 | 0.032   | NA |
| chr20 | 23342145 | 23343406 | GZF1      | ENSG00000125812 | -12   | 0.2  | 0.19 | 0.72 | 0.012   | NA |
| chr20 | 25676700 | 25677784 | ZNF337    | ENSG00000130684 | 209   | 0.18 | 0.19 | 0.72 | -0.014  | NA |
| chr20 | 37101171 | 37101742 | RALGAPB   | ENSG00000170471 | -3    | 0.14 | 0.15 | 0.72 | -0.011  | NA |
| chr20 | 56803282 | 56804112 | ANKRD60   | ENSG00000124227 | -2    | 0.27 | 0.25 | 0.73 | 0.023   | NA |
| chr20 | 60738312 | 60738728 | SS18L1    | ENSG00000184402 | 6     | 0.91 | 0.94 | 0.73 | -0.028  | NA |
| chr20 | 31070189 | 31072676 | C20orf112 | ENSG00000197183 | -158  | 0.22 | 0.23 | 0.74 | -0.0092 | NA |
| chr20 | 62492849 | 62494249 | ABHD16B   | ENSG00000183260 | 983   | 0.97 | 0.98 | 0.74 | -0.0045 | NA |
| chr20 | 11871374 | 11872207 | BTBD3     | ENSG00000132640 | 325   | 0.2  | 0.21 | 0.75 | -0.017  | NA |
| chr20 | 62102541 | 62103995 | KCNQ2     | ENSG00000075043 | 723   | 0.22 | 0.2  | 0.75 | 0.011   | NA |
| chr20 | 2489796  | 2489998  | ZNF343    | ENSG00000088876 | -119  | 0.24 | 0.19 | 0.76 | 0.047   | NA |
| chr20 | 30102057 | 30102856 | HM13      | ENSG00000101294 | 225   | 0.17 | 0.15 | 0.76 | 0.015   | NA |
| chr20 | 34203678 | 34204301 | SPAG4     | ENSG00000061656 | 175   | 0.17 | 0.19 | 0.76 | -0.019  | NA |
| chr20 | 55966212 | 55966964 | RBM38     | ENSG00000132819 | 125   | 0.16 | 0.18 | 0.76 | -0.017  | NA |
| chr20 | 60813371 | 60814247 | OSBPL2    | ENSG00000130703 | 229   | 0.25 | 0.24 | 0.76 | 0.016   | NA |
| chr20 | 388472   | 389342   | RBCK1     | ENSG00000125826 | 213   | 0.17 | 0.18 | 0.77 | -0.011  | NA |
| chr20 | 21106648 | 21106967 | PLK1S1    | ENSG00000088970 | 159   | 0.19 | 0.21 | 0.77 | -0.016  | NA |
| chr20 | 30062969 | 30063281 | REM1      | ENSG00000088320 | 29    | 0.24 | 0.2  | 0.77 | 0.041   | NA |
| chr20 | 48100764 | 48101022 | KCNB1     | ENSG00000158445 | -1709 | 0.2  | 0.3  | 0.77 | -0.096  | NA |
| chr20 | 62716288 | 62716533 | OPRL1     | ENSG00000125510 | 41    | 0.61 | 0.64 | 0.77 | -0.035  | NA |
| chr20 | 3387965  | 3388901  | C20orf194 | ENSG00000088854 | -161  | 0.28 | 0.29 | 0.78 | -0.014  | NA |
| chr20 | 25370335 | 25371823 | ABHD12    | ENSG00000100997 | -309  | 0.2  | 0.19 | 0.78 | 0.014   | NA |

|       |          |          |               |                 |       |      |      |      |         |    |
|-------|----------|----------|---------------|-----------------|-------|------|------|------|---------|----|
| chr20 | 61733275 | 61734521 | HAR1F         | ENSG00000238820 | 415   | 0.21 | 0.2  | 0.78 | 0.011   | NA |
| chr20 | 1099078  | 1099561  | PSMF1         | ENSG00000125818 | 78    | 0.24 | 0.25 | 0.79 | -0.015  | NA |
| chr20 | 31350149 | 31351263 | DNMT3B        | ENSG00000088305 | 515   | 0.22 | 0.21 | 0.79 | 0.013   | NA |
| chr20 | 49347365 | 49348659 | PARD6B        | ENSG00000124171 | -69   | 0.24 | 0.25 | 0.79 | -0.01   | NA |
| chr20 | 48729268 | 48729798 | UBE2V1        | ENSG00000244687 | 129   | 0.23 | 0.21 | 0.8  | 0.016   | NA |
| chr20 | 36156022 | 36156669 | BLCAP         | ENSG00000166619 | -220  | 0.22 | 0.24 | 0.81 | -0.017  | NA |
| chr20 | 2780978  | 2781497  | CPXM1         | ENSG00000088882 | 36    | 0.27 | 0.24 | 0.82 | 0.035   | NA |
| chr20 | 34824287 | 34824622 | C20orf4       | ENSG00000131043 | 73    | 0.21 | 0.19 | 0.82 | 0.021   | NA |
| chr20 | 54933992 | 54934370 | C20orf108     | ENSG00000124098 | 16    | 0.25 | 0.3  | 0.82 | -0.047  | NA |
| chr20 | 62679424 | 62680883 | ZNF512B       | ENSG00000196700 | -40   | 0.21 | 0.22 | 0.82 | -0.0088 | NA |
| chr20 | 2852899  | 2854635  | PTPRA         | ENSG00000132670 | -299  | 0.22 | 0.21 | 0.83 | 0.0085  | NA |
| chr20 | 17208550 | 17208756 | PCSK2         | ENSG00000125851 | -123  | 0.23 | 0.26 | 0.83 | -0.032  | NA |
| chr20 | 2489190  | 2489644  | ZNF343        | ENSG00000088876 | 130   | 0.26 | 0.29 | 0.84 | -0.024  | NA |
| chr20 | 44574821 | 44575022 | PCIF1         | ENSG00000100982 | 1275  | 0.88 | 1    | 0.84 | -0.12   | NA |
| chr20 | 61846843 | 61848103 | YTHDF1        | ENSG00000149658 | 18    | 0.24 | 0.25 | 0.84 | -0.0087 | NA |
| chr20 | 62328013 | 62328558 | RTEL1         | ENSG00000026036 | 264   | 0.23 | 0.21 | 0.84 | 0.024   | NA |
| chr20 | 4573176  | 4573496  | AL121916.1    | ENSG00000228210 | -1390 | 0.23 | 0.2  | 0.85 | 0.028   | NA |
| chr20 | 13765166 | 13765909 | ESF1          | ENSG00000089048 | -5    | 0.22 | 0.21 | 0.85 | 0.013   | NA |
| chr20 | 57426729 | 57427047 | GNAS-AS1      | ENSG00000235590 | -930  | 0.46 | 0.44 | 0.85 | 0.016   | NA |
| chr20 | 34204987 | 34205269 | SPAG4         | ENSG00000061656 | 160   | 0.41 | 0.37 | 0.86 | 0.037   | NA |
| chr20 | 62290246 | 62290462 | RTEL1         | ENSG00000026036 | -299  | 0.2  | 0.15 | 0.86 | 0.045   | NA |
| chr20 | 62378179 | 62378612 | RP4-583P15.10 | ENSG00000229299 | 1498  | 0.9  | 0.87 | 0.86 | 0.037   | NA |
| chr20 | 56884738 | 56885222 | RAB22A        | ENSG00000124209 | 228   | 0.2  | 0.22 | 0.88 | -0.02   | NA |
| chr20 | 3209813  | 3210080  | SLC4A11       | ENSG00000088836 | 476   | 0.84 | 1    | 0.89 | -0.16   | NA |
| chr20 | 17206528 | 17206952 | PCSK2         | ENSG00000125851 | -12   | 0.31 | 0.24 | 0.89 | 0.072   | NA |
| chr20 | 61147457 | 61147787 | C20orf166     | ENSG00000174407 | -38   | 0.25 | 0.29 | 0.89 | -0.04   | NA |
| chr20 | 32307817 | 32308120 | PXMP4         | ENSG00000101417 | 138   | 0.18 | 0.17 | 0.9  | 0.011   | NA |
| chr20 | 46130428 | 46131057 | NCOA3         | ENSG00000124151 | 141   | 0.18 | 0.17 | 0.9  | 0.011   | NA |
| chr20 | 3218578  | 3220930  | SLC4A11       | ENSG00000088836 | -942  | 0.23 | 0.23 | 0.91 | -0.0032 | NA |
| chr20 | 18568436 | 18569092 | DTD1          | ENSG00000125821 | 227   | 0.17 | 0.18 | 0.91 | -0.0093 | NA |

|       |          |          |              |                 |       |      |      |      |         |    |
|-------|----------|----------|--------------|-----------------|-------|------|------|------|---------|----|
| chr20 | 19738039 | 19739773 | RP1-122P22.2 | ENSG00000233895 | 554   | 0.2  | 0.21 | 0.91 | -0.0043 | NA |
| chr20 | 61919024 | 61919803 | ARFGAP1      | ENSG00000101199 | 405   | 0.88 | 0.87 | 0.91 | 0.011   | NA |
| chr20 | 1165365  | 1166332  | C20orf46     | ENSG00000125895 | 211   | 0.25 | 0.25 | 0.92 | 0.0062  | NA |
| chr20 | 3776198  | 3776419  | CDC25B       | ENSG00000101224 | -78   | 0.35 | 0.3  | 0.92 | 0.055   | NA |
| chr20 | 33460430 | 33460866 | GGT7         | ENSG00000131067 | -23   | 0.2  | 0.18 | 0.92 | 0.02    | NA |
| chr20 | 10198135 | 10198984 | SNAP25       | ENSG00000132639 | -919  | 0.25 | 0.24 | 0.93 | 0.0083  | NA |
| chr20 | 13975768 | 13976287 | SEL1L2       | ENSG00000101251 | -48   | 0.2  | 0.29 | 0.94 | -0.087  | NA |
| chr20 | 30071912 | 30072315 | NCRNA00028   | ENSG00000233354 | -1468 | 0.24 | 0.25 | 0.94 | -0.0075 | NA |
| chr20 | 37590617 | 37591184 | DHX35        | ENSG00000101452 | -42   | 0.18 | 0.17 | 0.95 | 0.0087  | NA |
| chr20 | 30555901 | 30556502 | XKR7         | ENSG00000101321 | 396   | 0.18 | 0.17 | 0.96 | 0.0076  | NA |
| chr20 | 37434206 | 37435592 | PPP1R16B     | ENSG00000101445 | 551   | 0.3  | 0.31 | 0.97 | -0.004  | NA |
| chr20 | 32890559 | 32891378 | AHCY         | ENSG00000101444 | 155   | 0.2  | 0.21 | 0.99 | -0.0059 | NA |
| chr20 | 34207447 | 34207681 | SPAG4        | ENSG00000061656 | 57    | 0.13 | 0.11 | 0.99 | 0.015   | NA |
| chr20 | 52789252 | 52790986 | CYP24A1      | ENSG00000019186 | -164  | 0.25 | 0.24 | 0.99 | 0.0025  | NA |
| chr20 | 442530   | 443365   | TBC1D20      | ENSG00000125875 | 197   | 0.18 | 0.19 | 1    | -0.003  | NA |
| chr20 | 2505159  | 2505979  | ZNF343       | ENSG00000088876 | -404  | 0.22 | 0.22 | 1    | 0.0018  | NA |
| chr20 | 3140295  | 3140570  | UBOX5        | ENSG00000185019 | 90    | 0.16 | 0.16 | 1    | 0.0033  | NA |
| chr20 | 3211906  | 3212178  | SLC4A11      | ENSG00000088836 | -836  | 1    | 1    | 1    | 0       | NA |
| chr20 | 3662310  | 3663187  | ADAM33       | ENSG00000149451 | -93   | 0.19 | 0.19 | 1    | -0.0004 | NA |
| chr20 | 20032740 | 20033471 | CRNKL1       | ENSG00000101343 | 5     | 0.21 | 0.21 | 1    | -0.0037 | NA |
| chr20 | 22559553 | 22560001 | NCRNA00261   | ENSG00000225074 | -497  | 0.18 | 0.18 | 1    | 0.0046  | NA |
| chr20 | 23330636 | 23332046 | NXT1         | ENSG00000132661 | -32   | 0.28 | 0.28 | 1    | 0.0047  | NA |
| chr20 | 23346034 | 23346650 | GZF1         | ENSG00000125812 | 486   | 0.98 | 0.98 | 1    | 0.0054  | NA |
| chr20 | 23617906 | 23618639 | CST3         | ENSG00000101439 | 310   | 0.18 | 0.18 | 1    | 0.0019  | NA |
| chr20 | 30160786 | 30161107 | RP3-324O17.2 | ENSG00000230613 | 120   | 0.18 | 0.33 | 1    | -0.15   | NA |
| chr20 | 30310503 | 30310707 | BCL2L1       | ENSG00000171552 | 58    | 0.44 | 0.38 | 1    | 0.069   | NA |
| chr20 | 30326913 | 30327430 | TPX2         | ENSG00000088325 | 97    | 0.27 | 0.26 | 1    | 0.00088 | NA |
| chr20 | 30467544 | 30467965 | TTLL9        | ENSG00000131044 | 124   | 0.16 | 0.16 | 1    | 0.0048  | NA |
| chr20 | 30777756 | 30778329 | TSPY26P      | ENSG00000235217 | 135   | 0.25 | 0.3  | 1    | -0.05   | NA |
| chr20 | 31123989 | 31124697 | C20orf112    | ENSG00000197183 | -143  | 0.21 | 0.21 | 1    | -0.001  | NA |

|       |          |          |               |                 |       |      |      |    |         |    |
|-------|----------|----------|---------------|-----------------|-------|------|------|----|---------|----|
| chr20 | 32273557 | 32274505 | E2F1          | ENSG00000101412 | 179   | 0.19 | 0.19 | 1  | 0.0024  | NA |
| chr20 | 33147527 | 33147744 | MAP1LC3A      | ENSG00000101460 | 1056  | 0.41 | 0.5  | 1  | -0.093  | NA |
| chr20 | 33291815 | 33292568 | TP53INP2      | ENSG00000078804 | 97    | 0.2  | 0.2  | 1  | -0.0022 | NA |
| chr20 | 35467641 | 35467849 | KIAA0889      | ENSG00000149639 | 60    | 1    | 1    | 1  | 0       | NA |
| chr20 | 36322168 | 36322586 | CTNBL1        | ENSG00000132792 | -31   | 0.25 | 0.33 | 1  | -0.083  | NA |
| chr20 | 42085948 | 42087322 | SRSF6         | ENSG00000124193 | 67    | 0.2  | 0.2  | 1  | 0.00022 | NA |
| chr20 | 43594894 | 43595244 | RP5-1069P2.4  | ENSG00000227477 | -26   | 0.18 | 0.18 | 1  | -0.0033 | NA |
| chr20 | 43935199 | 43935633 | RBPJL         | ENSG00000124232 | -75   | 0.73 | 0.67 | 1  | 0.061   | NA |
| chr20 | 44540445 | 44540957 | PLTP          | ENSG00000100979 | -15   | 0.21 | 0.2  | 1  | 0.0079  | NA |
| chr20 | 44562892 | 44564220 | PCIF1         | ENSG00000100982 | 289   | 0.2  | 0.2  | 1  | 0.002   | NA |
| chr20 | 44599805 | 44601207 | ZNF335        | ENSG00000198026 | 305   | 0.22 | 0.22 | 1  | -0.0011 | NA |
| chr20 | 44992677 | 44993103 | SLC35C2       | ENSG00000080189 | 110   | 0.21 | 0.2  | 1  | 0.0078  | NA |
| chr20 | 45279781 | 45280169 | SLC13A3       | ENSG00000158296 | 104   | 0.27 | 0.29 | 1  | -0.023  | NA |
| chr20 | 47835783 | 47836067 | DDX27         | ENSG00000124228 | 93    | 0.23 | 0.22 | 1  | 0.0053  | NA |
| chr20 | 52198058 | 52198400 | ZNF217        | ENSG00000171940 | 1407  | 0.95 | 0.94 | 1  | 0.0087  | NA |
| chr20 | 52824330 | 52825048 | PFDN4         | ENSG00000101132 | 303   | 0.24 | 0.25 | 1  | -0.004  | NA |
| chr20 | 54824312 | 54824584 | MC3R          | ENSG00000124089 | 660   | 1    | 0.95 | 1  | 0.045   | NA |
| chr20 | 57036303 | 57036605 | APCDD1L       | ENSG00000198768 | 582   | 1    | 0.98 | 1  | 0.021   | NA |
| chr20 | 61915934 | 61916290 | ARFGAP1       | ENSG00000101199 | 325   | 1    | 0.6  | 1  | 0.4     | NA |
| chr20 | 61953906 | 61954408 | COL20A1       | ENSG00000101203 | -1508 | 1    | 0.99 | 1  | 0.0077  | NA |
| chr20 | 62191381 | 62191627 | RP4-697K14.7  | ENSG00000130589 | 1454  | 1    | 0.96 | 1  | 0.036   | NA |
| chr20 | 62440414 | 62440649 | RP4-583P15.11 | ENSG00000231208 | 1102  | 1    | 1    | 1  | 0       | NA |
| chr20 | 13976700 | 13977068 | SEL1L2        | ENSG00000101251 | 205   | 0.21 | NA   | NA | NA      | NA |
| chr20 | 18477659 | 18477892 | RBBP9         | ENSG00000089050 | 43    | 0.37 | NA   | NA | NA      | NA |
| chr20 | 22566821 | 22567055 | FOXA2         | ENSG00000125798 | -845  | 0.42 | NA   | NA | NA      | NA |
| chr20 | 25176774 | 25177028 | ENTPD6        | ENSG00000197586 | 426   | 0.18 | NA   | NA | NA      | NA |
| chr20 | 32803823 | 32804181 | XPOTP1        | ENSG00000214185 | -304  | NA   | 1    | NA | NA      | NA |
| chr20 | 36150920 | 36151240 | BLCAP         | ENSG00000166619 | -985  | 0.34 | NA   | NA | NA      | NA |
| chr20 | 39968607 | 39968860 | LPIN3         | ENSG00000132793 | -827  | 0.21 | NA   | NA | NA      | NA |
| chr20 | 49457137 | 49457342 | TMSL6         | ENSG00000230043 | 47    | 1    | NA   | NA | NA      | NA |

|       |          |          |            |                 |       |      |      |          |       |    |
|-------|----------|----------|------------|-----------------|-------|------|------|----------|-------|----|
| chr20 | 60971535 | 60971776 | CABLES2    | ENSG00000149679 | -268  | 1    | NA   | NA       | NA    | NA |
| chr20 | 62153066 | 62153270 | PPDPF      | ENSG00000125534 | 1038  | 0.17 | NA   | NA       | NA    | NA |
| chr20 | 62318359 | 62318658 | RTEL1      | ENSG00000026036 | 784   | 1    | NA   | NA       | NA    | NA |
| chr21 | 44486140 | 44486465 | CBS        | ENSG00000160200 | -1965 | 0.97 | 0.31 | 1.40E-09 | 0.66  | NA |
| chr21 | 45875391 | 45877326 | LRRC3      | ENSG00000160233 | 965   | 0.68 | 0.45 | 1.40E-09 | 0.23  | NA |
| chr21 | 45742536 | 45742825 | PFKL       | ENSG00000141959 | -165  | 0.88 | 0.47 | 2.40E-09 | 0.41  | NA |
| chr21 | 38068193 | 38073891 | SIM2       | ENSG00000159263 | -391  | 0.32 | 0.22 | 2.30E-08 | 0.1   | NA |
| chr21 | 46221388 | 46222456 | UBE2G2     | ENSG00000184787 | -263  | 0.4  | 0.18 | 7.70E-08 | 0.22  | NA |
| chr21 | 19191095 | 19191952 | C21orf91   | ENSG00000154642 | -187  | 0.3  | 0.17 | 3.40E-07 | 0.13  | NA |
| chr21 | 36260450 | 36263687 | RUNX1      | ENSG00000159216 | -1081 | 0.27 | 0.16 | 9.40E-07 | 0.11  | NA |
| chr21 | 45753638 | 45754440 | C21orf2    | ENSG00000160226 | 155   | 0.98 | 0.7  | 4.90E-06 | 0.28  | NA |
| chr21 | 30396848 | 30397410 | USP16      | ENSG00000156256 | 179   | 0.41 | 0.15 | 1.20E-05 | 0.26  | NA |
| chr21 | 45138293 | 45139831 | PDXK       | ENSG00000160209 | 87    | 0.3  | 0.18 | 5.70E-05 | 0.12  | NA |
| chr21 | 37692208 | 37693059 | MORC3      | ENSG00000159256 | 146   | 0.32 | 0.15 | 7.50E-05 | 0.17  | NA |
| chr21 | 38338384 | 38338904 | HLCS       | ENSG00000159267 | 129   | 0.28 | 0.11 | 8.10E-05 | 0.17  | NA |
| chr21 | 10989913 | 10991413 | TPTE       | ENSG00000166157 | 219   | 0.74 | 0.64 | 9.50E-05 | 0.099 | NA |
| chr21 | 17101853 | 17103000 | USP25      | ENSG00000155313 | 82    | 0.3  | 0.16 | 0.00012  | 0.14  | NA |
| chr21 | 34602241 | 34603265 | IFNAR2     | ENSG00000159110 | 474   | 0.34 | 0.16 | 2.00E-04 | 0.18  | NA |
| chr21 | 33650908 | 33651513 | MIS18A     | ENSG00000159055 | 170   | 0.8  | 0.14 | 0.00022  | 0.66  | NA |
| chr21 | 42792293 | 42792704 | MX1        | ENSG00000157601 | 205   | 0.33 | 0.15 | 0.00031  | 0.18  | NA |
| chr21 | 46378278 | 46378645 | C21orf70   | ENSG00000160256 | 300   | 0.91 | 0.73 | 0.00032  | 0.18  | NA |
| chr21 | 48055199 | 48056060 | PRMT2      | ENSG00000160310 | 102   | 0.15 | 0.42 | 0.00051  | -0.27 | NA |
| chr21 | 27106814 | 27108211 | GABPA      | ENSG00000154727 | 631   | 0.24 | 0.16 | 9.00E-04 | 0.088 | NA |
| chr21 | 34863644 | 34864268 | DNAJC28    | ENSG00000177692 | -176  | 0.2  | 0.36 | 0.001    | -0.17 | NA |
| chr21 | 37442140 | 37442778 | CBR1       | ENSG00000159228 | 220   | 0.36 | 0.2  | 0.0015   | 0.16  | NA |
| chr21 | 28216558 | 28218117 | ADAMTS1    | ENSG00000154734 | 391   | 0.25 | 0.17 | 0.002    | 0.082 | NA |
| chr21 | 30670744 | 30671786 | BACH1      | ENSG00000156273 | 73    | 0.27 | 0.17 | 0.0023   | 0.094 | NA |
| chr21 | 35747326 | 35748122 | AP000320.6 | ENSG00000225555 | -77   | 0.24 | 0.14 | 0.0026   | 0.098 | NA |
| chr21 | 36258952 | 36259472 | RUNX1      | ENSG00000159216 | 268   | 0.18 | 0.35 | 0.0027   | -0.17 | NA |
| chr21 | 46876168 | 46876752 | COL18A1    | ENSG00000182871 | 1015  | 0.79 | 0.91 | 0.0027   | -0.12 | NA |

|       |          |          |            |                 |       |      |      |        |        |    |
|-------|----------|----------|------------|-----------------|-------|------|------|--------|--------|----|
| chr21 | 44257966 | 44258299 | AP001628.6 | ENSG00000225218 | -1545 | 0.78 | 0.36 | 0.0032 | 0.41   | NA |
| chr21 | 45431646 | 45432978 | TRAPPC10   | ENSG00000160218 | 112   | 0.3  | 0.19 | 0.0037 | 0.11   | NA |
| chr21 | 45526956 | 45527813 | PWP2       | ENSG00000241945 | 208   | 0.31 | 0.2  | 0.0044 | 0.11   | NA |
| chr21 | 47705627 | 47706428 | MCM3AP     | ENSG00000160294 | -216  | 0.27 | 0.18 | 0.0044 | 0.094  | NA |
| chr21 | 42539367 | 42540872 | BACE2      | ENSG00000182240 | 391   | 0.3  | 0.21 | 0.0065 | 0.091  | NA |
| chr21 | 46707629 | 46708751 | POFUT2     | ENSG00000186866 | -391  | 0.25 | 0.17 | 0.0082 | 0.078  | NA |
| chr21 | 19617098 | 19617874 | CHODL      | ENSG00000154645 | 336   | 0.21 | 0.11 | 0.011  | 0.1    | NA |
| chr21 | 18984535 | 18985697 | BTG3       | ENSG00000154640 | 46    | 0.24 | 0.16 | 0.012  | 0.081  | NA |
| chr21 | 33783914 | 33785717 | C21orf63   | ENSG00000166979 | 501   | 0.24 | 0.18 | 0.012  | 0.062  | NA |
| chr21 | 40032243 | 40033665 | ERG        | ENSG00000157554 | -363  | 0.3  | 0.22 | 0.013  | 0.078  | NA |
| chr21 | 42798146 | 42798884 | MX1        | ENSG00000157601 | 347   | 0.35 | 0.22 | 0.013  | 0.13   | NA |
| chr21 | 15436119 | 15436962 | AP001347.5 | ENSG00000249493 | -106  | 0.99 | 0.94 | 0.014  | 0.045  | NA |
| chr21 | 46957315 | 46957916 | SLC19A1    | ENSG00000173638 | 232   | 0.97 | 0.9  | 0.014  | 0.073  | NA |
| chr21 | 27945010 | 27945646 | CYYR1      | ENSG00000166265 | 167   | 0.32 | 0.19 | 0.015  | 0.13   | NA |
| chr21 | 30391264 | 30391758 | RWDD2B     | ENSG00000156253 | 116   | 0.27 | 0.15 | 0.015  | 0.13   | NA |
| chr21 | 45758975 | 45759525 | AP001062.9 | ENSG00000232969 | -9    | 0.21 | 0.09 | 0.022  | 0.11   | NA |
| chr21 | 47421844 | 47423883 | COL6A1     | ENSG00000142156 | 460   | 0.93 | 0.96 | 0.022  | -0.034 | NA |
| chr21 | 15588439 | 15588908 | RBM11      | ENSG00000185272 | 222   | 0.13 | 0.27 | 0.024  | -0.14  | NA |
| chr21 | 44840119 | 44840450 | SIK1       | ENSG00000142178 | 1601  | 0.95 | 1    | 0.033  | -0.047 | NA |
| chr21 | 46351328 | 46352911 | ITGB2      | ENSG00000160255 | -215  | 0.26 | 0.2  | 0.033  | 0.063  | NA |
| chr21 | 35445087 | 35446013 | MRPS6      | ENSG00000243927 | 26    | 0.25 | 0.16 | 0.038  | 0.083  | NA |
| chr21 | 45209221 | 45209880 | RRP1       | ENSG00000160214 | 156   | 0.28 | 0.21 | 0.039  | 0.078  | NA |
| chr21 | 44494624 | 44496989 | CBS        | ENSG00000160200 | 135   | 0.24 | 0.2  | 0.041  | 0.044  | NA |
| chr21 | 40684370 | 40686324 | BRWD1      | ENSG00000185658 | -120  | 0.24 | 0.18 | 0.042  | 0.052  | NA |
| chr21 | 44527163 | 44528066 | U2AF1      | ENSG00000160201 | 20    | 0.22 | 0.16 | 0.042  | 0.065  | NA |
| chr21 | 38079941 | 38081833 | SIM2       | ENSG00000159263 | -594  | 0.27 | 0.22 | 0.047  | 0.058  | NA |
| chr21 | 37757496 | 37758113 | CHAF1B     | ENSG00000159259 | 128   | 0.45 | 0.29 | 0.052  | 0.15   | NA |
| chr21 | 38639235 | 38640491 | DSCR3      | ENSG00000157538 | -409  | 0.21 | 0.15 | 0.056  | 0.061  | NA |
| chr21 | 33765013 | 33765300 | URB1       | ENSG00000142207 | 179   | 0.25 | 0.12 | 0.062  | 0.13   | NA |
| chr21 | 33244910 | 33246609 | HUNK       | ENSG00000142149 | 131   | 0.25 | 0.2  | 0.064  | 0.053  | NA |



|       |          |          |            |                 |      |      |      |       |        |    |
|-------|----------|----------|------------|-----------------|------|------|------|-------|--------|----|
| chr21 | 45622218 | 45622500 | AP001057.1 | ENSG00000232124 | 1186 | 0.98 | 0.93 | 0.065 | 0.058  | NA |
| chr21 | 39287946 | 39289267 | KCNJ6      | ENSG00000157542 | 143  | 0.24 | 0.16 | 0.067 | 0.079  | NA |
| chr21 | 40177002 | 40178667 | ETS2       | ENSG00000157557 | 603  | 0.2  | 0.16 | 0.067 | 0.041  | NA |
| chr21 | 47851448 | 47851683 | PCNT       | ENSG00000160299 | 392  | 0.93 | 0.76 | 0.077 | 0.17   | NA |
| chr21 | 22369423 | 22370582 | NCAM2      | ENSG00000154654 | -631 | 0.27 | 0.18 | 0.08  | 0.09   | NA |
| chr21 | 31311386 | 31312106 | GRIK1      | ENSG00000171189 | 72   | 0.16 | 0.22 | 0.08  | -0.061 | NA |
| chr21 | 34442206 | 34444543 | OLIG1      | ENSG00000184221 | 924  | 0.27 | 0.22 | 0.082 | 0.05   | NA |
| chr21 | 44073201 | 44074650 | PDE9A      | ENSG00000160191 | 179  | 0.23 | 0.17 | 0.087 | 0.061  | NA |
| chr21 | 47742779 | 47743269 | C21orf58   | ENSG00000160298 | 747  | 0.22 | 0.36 | 0.089 | -0.14  | NA |
| chr21 | 30445575 | 30446255 | CCT8       | ENSG00000156261 | -243 | 0.19 | 0.3  | 0.093 | -0.12  | NA |
| chr21 | 45739639 | 45739927 | PFKL       | ENSG00000141959 | 59   | 0.56 | 0.83 | 0.093 | -0.27  | NA |
| chr21 | 43160916 | 43161948 | AP001615.9 | ENSG00000236883 | 1899 | 0.96 | 0.92 | 0.099 | 0.037  | NA |
| chr21 | 43547871 | 43548089 | UMODL1     | ENSG00000177398 | 192  | 0.9  | 0.72 | 0.1   | 0.18   | NA |
| chr21 | 33984367 | 33985450 | C21orf59   | ENSG00000159079 | -452 | 0.28 | 0.22 | 0.12  | 0.064  | NA |
| chr21 | 46961668 | 46963078 | SLC19A1    | ENSG00000173638 | -621 | 0.36 | 0.3  | 0.13  | 0.058  | NA |
| chr21 | 45379516 | 45379816 | AGPAT3     | ENSG00000160216 | 2    | 0.86 | 0.56 | 0.16  | 0.31   | NA |
| chr21 | 32929927 | 32932017 | TIAM1      | ENSG00000156299 | 318  | 0.23 | 0.2  | 0.17  | 0.033  | NA |
| chr21 | 47565285 | 47566345 | FTCD       | ENSG00000160282 | -328 | 0.87 | 0.92 | 0.17  | -0.042 | NA |
| chr21 | 37507198 | 37508259 | CBR3       | ENSG00000159231 | 518  | 0.21 | 0.15 | 0.18  | 0.055  | NA |
| chr21 | 40752087 | 40752825 | WRB        | ENSG00000182093 | 286  | 0.26 | 0.2  | 0.19  | 0.066  | NA |
| chr21 | 45719515 | 45720564 | PFKL       | ENSG00000141959 | 105  | 0.21 | 0.16 | 0.19  | 0.051  | NA |
| chr21 | 34696532 | 34697750 | IFNAR1     | ENSG00000142166 | 407  | 0.28 | 0.22 | 0.2   | 0.065  | NA |
| chr21 | 35013876 | 35014257 | CRYZL1     | ENSG00000205758 | -40  | 0.2  | 0.31 | 0.2   | -0.11  | NA |
| chr21 | 47648191 | 47649622 | LSS        | ENSG00000160285 | -230 | 0.23 | 0.18 | 0.2   | 0.051  | NA |
| chr21 | 34914303 | 34915906 | GART       | ENSG00000159131 | -719 | 0.3  | 0.23 | 0.21  | 0.065  | NA |
| chr21 | 40720185 | 40721625 | HMGN1      | ENSG00000205581 | -640 | 0.26 | 0.2  | 0.21  | 0.059  | NA |
| chr21 | 47333947 | 47334449 | PCBP3      | ENSG00000183570 | 246  | 0.92 | 1    | 0.21  | -0.078 | NA |
| chr21 | 47743685 | 47745351 | C21orf58   | ENSG00000160298 | -747 | 0.22 | 0.18 | 0.21  | 0.033  | NA |
| chr21 | 37502377 | 37502826 | MEMO1P1    | ENSG00000226054 | -68  | 0.44 | 0.24 | 0.22  | 0.2    | NA |
| chr21 | 43373135 | 43374062 | C2CD2      | ENSG00000157617 | 30   | 0.33 | 0.41 | 0.22  | -0.08  | NA |

|       |          |          |            |                 |      |      |      |      |        |    |
|-------|----------|----------|------------|-----------------|------|------|------|------|--------|----|
| chr21 | 47517651 | 47518999 | COL6A2     | ENSG00000142173 | 314  | 0.19 | 0.23 | 0.22 | -0.039 | NA |
| chr21 | 37528205 | 37529561 | AP000689.8 | ENSG00000236830 | -290 | 0.24 | 0.19 | 0.23 | 0.049  | NA |
| chr21 | 42218489 | 42219222 | DSCAM      | ENSG00000171587 | 210  | 0.28 | 0.23 | 0.23 | 0.051  | NA |
| chr21 | 44985071 | 44985474 | H2BFS      | ENSG00000234289 | 152  | 0.98 | 0.91 | 0.24 | 0.072  | NA |
| chr21 | 47421135 | 47421398 | COL6A1     | ENSG00000142156 | 155  | 0.93 | 0.87 | 0.26 | 0.064  | NA |
| chr21 | 40760626 | 40760829 | WRB        | ENSG00000182093 | 1010 | 0.32 | 0.16 | 0.27 | 0.17   | NA |
| chr21 | 44394084 | 44395850 | PKNOX1     | ENSG00000160199 | 347  | 0.29 | 0.26 | 0.27 | 0.039  | NA |
| chr21 | 44477654 | 44478065 | CBS        | ENSG00000160200 | 1192 | 0.98 | 0.95 | 0.27 | 0.032  | NA |
| chr21 | 45789090 | 45789373 | TRPM2      | ENSG00000142185 | 227  | 0.32 | 0.75 | 0.27 | -0.43  | NA |
| chr21 | 40757602 | 40757900 | WRB        | ENSG00000182093 | -268 | 0.36 | 0.46 | 0.3  | -0.096 | NA |
| chr21 | 18984005 | 18984298 | BTG3       | ENSG00000154640 | 1011 | 0.2  | 0.5  | 0.31 | -0.3   | NA |
| chr21 | 44299111 | 44299808 | WDR4       | ENSG00000160193 | -74  | 0.3  | 0.22 | 0.31 | 0.078  | NA |
| chr21 | 46714984 | 46715206 | NCRNA00205 | ENSG00000223768 | 1895 | 1    | 0.84 | 0.32 | 0.16   | NA |
| chr21 | 33765512 | 33765752 | C21orf119  | ENSG00000256073 | 193  | 0.2  | 0.27 | 0.33 | -0.07  | NA |
| chr21 | 48068517 | 48068808 | PRMT2      | ENSG00000160310 | 242  | 1    | 0.95 | 0.33 | 0.054  | NA |
| chr21 | 43917046 | 43917268 | AP001625.4 | ENSG00000239930 | 508  | 0.4  | 0.25 | 0.36 | 0.15   | NA |
| chr21 | 34851229 | 34852702 | TMEM50B    | ENSG00000142188 | -369 | 0.27 | 0.22 | 0.39 | 0.046  | NA |
| chr21 | 35287803 | 35288208 | ATP5O      | ENSG00000241837 | 23   | 0.25 | 0.18 | 0.39 | 0.069  | NA |
| chr21 | 45553021 | 45554037 | C21orf33   | ENSG00000160221 | 42   | 0.22 | 0.19 | 0.39 | 0.035  | NA |
| chr21 | 46359647 | 46360423 | C21orf67   | ENSG00000183250 | -275 | 0.24 | 0.2  | 0.39 | 0.037  | NA |
| chr21 | 30364965 | 30365342 | LTN1       | ENSG00000198862 | 117  | 0.23 | 0.19 | 0.42 | 0.037  | NA |
| chr21 | 40554764 | 40556117 | PSMG1      | ENSG00000183527 | -227 | 0.17 | 0.14 | 0.43 | 0.029  | NA |
| chr21 | 15456285 | 15456856 | AP001347.1 | ENSG00000241115 | 932  | 0.93 | 0.96 | 0.44 | -0.034 | NA |
| chr21 | 46912381 | 46912628 | COL18A1    | ENSG00000182871 | -605 | 0.92 | 0.97 | 0.45 | -0.052 | NA |
| chr21 | 45660202 | 45660414 | ICOSLG     | ENSG00000160223 | 415  | 0.22 | 0.31 | 0.46 | -0.087 | NA |
| chr21 | 45844992 | 45845693 | AP001065.2 | ENSG00000230061 | -187 | 0.93 | 0.9  | 0.46 | 0.028  | NA |
| chr21 | 36041305 | 36043224 | CLIC6      | ENSG00000159212 | 576  | 0.24 | 0.23 | 0.47 | 0.018  | NA |
| chr21 | 43933589 | 43934832 | SLC37A1    | ENSG00000160190 | 208  | 0.26 | 0.29 | 0.47 | -0.03  | NA |
| chr21 | 15351908 | 15352658 | C21orf81   | ENSG00000215559 | -51  | 0.5  | 0.43 | 0.48 | 0.068  | NA |
| chr21 | 40817302 | 40817973 | LCA5L      | ENSG00000157578 | 8    | 0.15 | 0.19 | 0.48 | -0.03  | NA |

|       |          |          |             |                 |      |      |      |      |        |    |
|-------|----------|----------|-------------|-----------------|------|------|------|------|--------|----|
| chr21 | 46824531 | 46826234 | COL18A1     | ENSG00000182871 | 330  | 0.28 | 0.25 | 0.48 | 0.026  | NA |
| chr21 | 46494173 | 46495472 | ADARB1      | ENSG00000197381 | 338  | 0.25 | 0.27 | 0.51 | -0.021 | NA |
| chr21 | 16436496 | 16437864 | NRIP1       | ENSG00000180530 | -54  | 0.2  | 0.23 | 0.52 | -0.021 | NA |
| chr21 | 42878751 | 42880674 | TMPRSS2     | ENSG00000184012 | 197  | 0.28 | 0.25 | 0.53 | 0.023  | NA |
| chr21 | 45148454 | 45149262 | PDXK        | ENSG00000160209 | 247  | 0.24 | 0.3  | 0.53 | -0.055 | NA |
| chr21 | 47061773 | 47064308 | PCBP3       | ENSG00000183570 | -568 | 0.29 | 0.26 | 0.53 | 0.025  | NA |
| chr21 | 42676113 | 42676413 | FAM3B       | ENSG00000183844 | 124  | 0.94 | 0.86 | 0.54 | 0.086  | NA |
| chr21 | 43186280 | 43187436 | RIPK4       | ENSG00000183421 | -506 | 0.28 | 0.26 | 0.54 | 0.023  | NA |
| chr21 | 43429279 | 43431489 | NCRNA00318  | ENSG00000237232 | 1081 | 0.21 | 0.19 | 0.55 | 0.014  | NA |
| chr21 | 37667809 | 37668088 | SRSF9P1     | ENSG00000214867 | 52   | 0.99 | 0.97 | 0.56 | 0.023  | NA |
| chr21 | 38362015 | 38362868 | HLCS        | ENSG00000159267 | 83   | 0.24 | 0.21 | 0.56 | 0.028  | NA |
| chr21 | 37432123 | 37433150 | SETD4       | ENSG00000185917 | -96  | 0.18 | 0.21 | 0.57 | -0.024 | NA |
| chr21 | 43638948 | 43640132 | ABCG1       | ENSG00000160179 | 313  | 0.26 | 0.23 | 0.58 | 0.021  | NA |
| chr21 | 46292709 | 46294744 | PTTG1IP     | ENSG00000183255 | -779 | 0.3  | 0.32 | 0.58 | -0.021 | NA |
| chr21 | 43221474 | 43221842 | PRDM15      | ENSG00000141956 | 1620 | 0.97 | 1    | 0.6  | -0.027 | NA |
| chr21 | 43236025 | 43236510 | PRDM15      | ENSG00000141956 | -949 | 0.96 | 0.94 | 0.6  | 0.023  | NA |
| chr21 | 15755371 | 15756086 | HSPA13      | ENSG00000155304 | -270 | 0.26 | 0.31 | 0.61 | -0.047 | NA |
| chr21 | 34099716 | 34100796 | SYNJ1       | ENSG00000159082 | -6   | 0.2  | 0.21 | 0.64 | -0.018 | NA |
| chr21 | 30257425 | 30257771 | N6AMT1      | ENSG00000156239 | 95   | 0.25 | 0.36 | 0.65 | -0.11  | NA |
| chr21 | 46706691 | 46707049 | POFUT2      | ENSG00000186866 | 929  | 0.22 | 0.25 | 0.66 | -0.034 | NA |
| chr21 | 46685115 | 46685379 | POFUT2      | ENSG00000186866 | 1043 | 0.96 | 0.92 | 0.67 | 0.035  | NA |
| chr21 | 43916278 | 43916900 | RSPH1       | ENSG00000160188 | -293 | 0.22 | 0.27 | 0.68 | -0.045 | NA |
| chr21 | 44782248 | 44782601 | AP001046.5  | ENSG00000237989 | -195 | 0.26 | 0.19 | 0.68 | 0.066  | NA |
| chr21 | 35014823 | 35015792 | ITSN1       | ENSG00000205726 | 459  | 0.25 | 0.21 | 0.69 | 0.036  | NA |
| chr21 | 46129391 | 46129689 | TSPEAR      | ENSG00000175894 | 1922 | 1    | 0.58 | 0.73 | 0.42   | NA |
| chr21 | 34775437 | 34776493 | IFNGR2      | ENSG00000159128 | 232  | 0.23 | 0.22 | 0.76 | 0.014  | NA |
| chr21 | 38352856 | 38353274 | HLCS        | ENSG00000159267 | -137 | 0.23 | 0.26 | 0.8  | -0.024 | NA |
| chr21 | 38592987 | 38593674 | AP001432.14 | ENSG00000242553 | -390 | 0.22 | 0.25 | 0.82 | -0.032 | NA |
| chr21 | 44106168 | 44106546 | PDE9A       | ENSG00000160191 | 50   | 0.99 | 1    | 0.82 | -0.013 | NA |
| chr21 | 9968264  | 9968620  | MAFIP       | ENSG00000188681 | 106  | 1    | 0.8  | 0.84 | 0.2    | NA |

|       |          |          |            |                 |      |      |      |      |         |    |
|-------|----------|----------|------------|-----------------|------|------|------|------|---------|----|
| chr21 | 27011624 | 27012398 | JAM2       | ENSG00000154721 | 101  | 0.21 | 0.24 | 0.84 | -0.031  | NA |
| chr21 | 47855892 | 47856143 | PCNT       | ENSG00000160299 | -937 | 0.95 | 0.97 | 0.84 | -0.014  | NA |
| chr21 | 33103456 | 33104975 | SCAF4      | ENSG00000156304 | 59   | 0.19 | 0.2  | 0.86 | -0.0074 | NA |
| chr21 | 45195887 | 45196755 | CSTB       | ENSG00000160213 | -134 | 0.21 | 0.23 | 0.87 | -0.02   | NA |
| chr21 | 28218567 | 28218801 | ADAMTS1    | ENSG00000154734 | -956 | 0.21 | 0.2  | 0.9  | 0.017   | NA |
| chr21 | 27541893 | 27543524 | APP        | ENSG00000142192 | 264  | 0.22 | 0.23 | 0.92 | -0.005  | NA |
| chr21 | 43229294 | 43229508 | PRDM15     | ENSG00000141956 | 1421 | 0.98 | 0.92 | 0.92 | 0.059   | NA |
| chr21 | 18884806 | 18886111 | CXADR      | ENSG00000154639 | 94   | 0.23 | 0.24 | 0.93 | -0.0087 | NA |
| chr21 | 26979577 | 26980252 | MRPL39     | ENSG00000154719 | -118 | 0.19 | 0.18 | 0.97 | 0.0066  | NA |
| chr21 | 38444860 | 38446497 | PIGP       | ENSG00000185808 | -655 | 0.31 | 0.3  | 0.97 | 0.012   | NA |
| chr21 | 43255476 | 43255722 | PRDM15     | ENSG00000141956 | 28   | 0.97 | 0.98 | 0.99 | -0.0088 | NA |
| chr21 | 14409412 | 14410501 | ANKRD30BP2 | ENSG00000224309 | -525 | 0.83 | 0.85 | 1    | -0.019  | NA |
| chr21 | 15399937 | 15400194 | AP001347.6 | ENSG00000224905 | 293  | 0.52 | 0.67 | 1    | -0.15   | NA |
| chr21 | 15442956 | 15443160 | 5S_rRNA    | ENSG00000201812 | -134 | 1    | 0.97 | 1    | 0.032   | NA |
| chr21 | 26734108 | 26734485 | RPL13AP7   | ENSG00000213885 | 161  | 0.98 | 0.97 | 1    | 0.0098  | NA |
| chr21 | 28515802 | 28516306 | GPX1P2     | ENSG00000215326 | 214  | 0.99 | 0.99 | 1    | -0.0007 | NA |
| chr21 | 32716044 | 32716485 | TIAM1      | ENSG00000156299 | 330  | 0.26 | 0.25 | 1    | 0.01    | NA |
| chr21 | 33031734 | 33032657 | AP000253.1 | ENSG00000234509 | -382 | 0.21 | 0.21 | 1    | 0.0025  | NA |
| chr21 | 34960388 | 34961252 | DONSON     | ENSG00000159147 | 120  | 0.16 | 0.16 | 1    | 0.0037  | NA |
| chr21 | 35986623 | 35987798 | RCAN1      | ENSG00000159200 | -465 | 0.14 | 0.14 | 1    | 0.0013  | NA |
| chr21 | 37259191 | 37259602 | PPP1R2P2   | ENSG00000234008 | -97  | 0.99 | 0.98 | 1    | 0.0011  | NA |
| chr21 | 37617467 | 37617872 | DOPEY2     | ENSG00000142197 | -930 | 1    | 0.96 | 1    | 0.04    | NA |
| chr21 | 42688746 | 42689085 | FAM3B      | ENSG00000183844 | 174  | 0.11 | 0.25 | 1    | -0.14   | NA |
| chr21 | 43240351 | 43240586 | PRDM15     | ENSG00000141956 | -329 | 0.95 | 1    | 1    | -0.045  | NA |
| chr21 | 43327734 | 43328024 | C2CD2      | ENSG00000157617 | 1032 | 0.94 | 0.95 | 1    | -0.0095 | NA |
| chr21 | 43526570 | 43526817 | C21orf128  | ENSG00000184385 | 1951 | 0.96 | 0.98 | 1    | -0.019  | NA |
| chr21 | 44312913 | 44313860 | NDUFV3     | ENSG00000160194 | 11   | 0.18 | 0.19 | 1    | -0.0059 | NA |
| chr21 | 44590612 | 44590826 | CRYAA      | ENSG00000160202 | 382  | 0.88 | 0.89 | 1    | -0.007  | NA |
| chr21 | 45744313 | 45744847 | PFKL       | ENSG00000141959 | 1735 | 0.93 | 0.95 | 1    | -0.021  | NA |
| chr21 | 45926531 | 45926754 | TSPEAR-AS1 | ENSG00000235890 | -48  | 0.98 | 0.98 | 1    | -0.0024 | NA |

|       |          |          |              |                 |       |      |      |          |         |    |
|-------|----------|----------|--------------|-----------------|-------|------|------|----------|---------|----|
| chr21 | 46392064 | 46392348 | C21orf70     | ENSG00000160256 | -765  | 0.96 | 1    | 1        | -0.043  | NA |
| chr21 | 46686907 | 46687121 | POFUT2       | ENSG00000186866 | -724  | 0.95 | 0.95 | 1        | -0.0042 | NA |
| chr21 | 46950586 | 46952286 | SLC19A1      | ENSG00000173638 | 19    | 0.97 | 0.97 | 1        | 0.002   | NA |
| chr21 | 47407675 | 47408456 | COL6A1       | ENSG00000142156 | 1042  | 1    | 1    | 1        | 0       | NA |
| chr21 | 47457159 | 47457739 | AP001476.2   | ENSG00000224413 | 483   | 1    | 1    | 1        | 0       | NA |
| chr21 | 47531899 | 47532821 | COL6A2       | ENSG00000142173 | 28    | 0.96 | 0.97 | 1        | -0.0024 | NA |
| chr21 | 47602431 | 47602740 | C21orf56     | ENSG00000160284 | 1788  | 1    | 1    | 1        | 0       | NA |
| chr21 | 47849049 | 47849390 | PCNT         | ENSG00000160299 | -1954 | 0.91 | 0.9  | 1        | 0.0026  | NA |
| chr21 | 47878070 | 47879576 | AP000337.1   | ENSG00000245754 | -230  | 0.21 | 0.21 | 1        | 0.00058 | NA |
| chr21 | 15309633 | 15309847 | RHOT1P2      | ENSG00000203616 | -94   | 0.87 | NA   | NA       | NA      | NA |
| chr21 | 44515262 | 44515560 | U2AF1        | ENSG00000160201 | 642   | NA   | 0.83 | NA       | NA      | NA |
| chr22 | 50725469 | 50725818 | PLXNB2       | ENSG00000196576 | -961  | 0.95 | 0.26 | 2.10E-09 | 0.7     | NA |
| chr22 | 19709081 | 19712106 | GP1BB        | ENSG00000203618 | 125   | 0.89 | 0.81 | 1.90E-08 | 0.085   | NA |
| chr22 | 50118095 | 50118822 | RP5-983L19.2 | ENSG00000226954 | -304  | 0.3  | 0.46 | 3.00E-08 | -0.16   | NA |
| chr22 | 18593113 | 18594197 | TUBA8        | ENSG00000183785 | 202   | 0.42 | 0.22 | 9.80E-08 | 0.2     | NA |
| chr22 | 31218226 | 31218893 | OSBP2        | ENSG00000184792 | 56    | 0.63 | 0.27 | 1.20E-07 | 0.36    | NA |
| chr22 | 36902024 | 36903298 | FOXRED2      | ENSG00000100350 | -84   | 0.59 | 0.44 | 1.20E-07 | 0.15    | NA |
| chr22 | 39151457 | 39152476 | SUN2         | ENSG00000100242 | -433  | 0.27 | 0.15 | 2.00E-07 | 0.13    | NA |
| chr22 | 46929317 | 46934861 | CELSR1       | ENSG00000075275 | -1992 | 0.55 | 0.47 | 3.40E-07 | 0.082   | NA |
| chr22 | 45403036 | 45406372 | PHF21B       | ENSG00000056487 | 126   | 0.29 | 0.19 | 3.80E-07 | 0.096   | NA |
| chr22 | 51042293 | 51043422 | MAPK8IP2     | ENSG00000008735 | 1295  | 0.95 | 0.86 | 4.10E-07 | 0.086   | NA |
| chr22 | 38073037 | 38073412 | LGALS1       | ENSG00000100097 | 218   | 0.26 | 0.6  | 9.60E-07 | -0.34   | NA |
| chr22 | 31503236 | 31503871 | RP3-412A9.11 | ENSG00000198832 | -101  | 0.42 | 0.16 | 1.20E-06 | 0.26    | NA |
| chr22 | 29468639 | 29470233 | KREMEN1      | ENSG00000183762 | 370   | 0.38 | 0.21 | 1.40E-06 | 0.17    | NA |
| chr22 | 45097755 | 45098801 | PRR5         | ENSG00000186654 | 200   | 0.31 | 0.15 | 3.00E-06 | 0.16    | NA |
| chr22 | 44287497 | 44288061 | PNPLA5       | ENSG00000100341 | 96    | 0.36 | 0.18 | 6.30E-06 | 0.17    | NA |
| chr22 | 26879458 | 26879930 | HPS4         | ENSG00000100099 | 55    | 0.09 | 0.27 | 6.50E-06 | -0.18   | NA |
| chr22 | 38379093 | 38379964 | SOX10        | ENSG00000100146 | -107  | 0.93 | 0.77 | 8.00E-06 | 0.16    | NA |
| chr22 | 38349502 | 38349969 | C22orf23     | ENSG00000128346 | -183  | 0.35 | 0.13 | 8.10E-06 | 0.22    | NA |
| chr22 | 50726108 | 50726520 | PLXNB2       | ENSG00000196576 | -1632 | 0.95 | 0.81 | 1.70E-05 | 0.14    | NA |

|       |          |          |              |                 |       |      |      |          |        |    |
|-------|----------|----------|--------------|-----------------|-------|------|------|----------|--------|----|
| chr22 | 21319178 | 21319912 | AIFM3        | ENSG00000183773 | 149   | 0.32 | 0.14 | 2.10E-05 | 0.18   | NA |
| chr22 | 32145635 | 32146200 | PRR14L       | ENSG00000183530 | 141   | 0.15 | 0.41 | 2.50E-05 | -0.26  | NA |
| chr22 | 42538474 | 42539579 | CYP2D7P1     | ENSG00000205702 | 559   | 0.96 | 0.83 | 2.60E-05 | 0.13   | NA |
| chr22 | 50632707 | 50633041 | TRABD        | ENSG00000170638 | 1431  | 0.85 | 0.54 | 2.90E-05 | 0.31   | NA |
| chr22 | 50628949 | 50629249 | TRABD        | ENSG00000170638 | 72    | 0.67 | 0.4  | 3.20E-05 | 0.27   | NA |
| chr22 | 37956102 | 37957926 | CDC42EP1     | ENSG00000128283 | 560   | 0.29 | 0.19 | 4.00E-05 | 0.098  | NA |
| chr22 | 51016253 | 51017020 | CPT1B        | ENSG00000205560 | -339  | 0.75 | 0.52 | 5.20E-05 | 0.23   | NA |
| chr22 | 30116081 | 30117160 | CABP7        | ENSG00000100314 | 547   | 0.25 | 0.14 | 6.40E-05 | 0.1    | NA |
| chr22 | 50246590 | 50248143 | ZBED4        | ENSG00000100426 | -124  | 0.36 | 0.23 | 7.00E-05 | 0.13   | NA |
| chr22 | 46658397 | 46659332 | PKDREJ       | ENSG00000130943 | 355   | 0.41 | 0.29 | 7.70E-05 | 0.12   | NA |
| chr22 | 19705510 | 19706557 | 5-Sep        | ENSG00000184702 | 351   | 0.19 | 0.33 | 7.90E-05 | -0.14  | NA |
| chr22 | 45559298 | 45560172 | CTA-217C2.1  | ENSG00000226328 | -195  | 0.21 | 0.12 | 0.00012  | 0.084  | NA |
| chr22 | 30819399 | 30820297 | MTFP1        | ENSG00000242114 | -1670 | 0.18 | 0.32 | 0.00017  | -0.14  | NA |
| chr22 | 46465976 | 46468528 | RP6-109B7.4  | ENSG00000235159 | -1481 | 0.2  | 0.15 | 4.00E-04 | 0.054  | NA |
| chr22 | 44392309 | 44392669 | SAMM50       | ENSG00000100347 | 1218  | 0.96 | 0.82 | 0.00045  | 0.14   | NA |
| chr22 | 50984972 | 50988141 | KLHDC7B      | ENSG00000130487 | 94    | 0.51 | 0.61 | 0.00047  | -0.098 | NA |
| chr22 | 19748650 | 19749189 | TBX1         | ENSG00000184058 | 199   | 0.2  | 0.38 | 0.00054  | -0.18  | NA |
| chr22 | 22901386 | 22901698 | PRAME        | ENSG00000185686 | -52   | 0.51 | 0.77 | 0.00058  | -0.25  | NA |
| chr22 | 16423842 | 16424117 | LA16c-23H5.6 | ENSG00000235759 | -146  | 0.79 | 0.57 | 0.00063  | 0.22   | NA |
| chr22 | 23483997 | 23484309 | RTDR1        | ENSG00000100218 | 127   | 0.55 | 0.26 | 0.00064  | 0.29   | NA |
| chr22 | 46727378 | 46727703 | TRMU         | ENSG00000100416 | 196   | 0.93 | 0.68 | 0.00068  | 0.25   | NA |
| chr22 | 50217157 | 50217663 | BRD1         | ENSG00000100425 | -461  | 0.97 | 0.88 | 0.00087  | 0.088  | NA |
| chr22 | 46371469 | 46375234 | WNT7B        | ENSG00000188064 | -1562 | 0.28 | 0.2  | 0.00097  | 0.072  | NA |
| chr22 | 43583502 | 43583830 | TTLL12       | ENSG00000100304 | -527  | 0.15 | 0.34 | 0.00098  | -0.18  | NA |
| chr22 | 19967279 | 19967808 | ARVCF        | ENSG00000099889 | -604  | 0.86 | 0.7  | 0.001    | 0.16   | NA |
| chr22 | 16155753 | 16158017 | AP000525.1   | ENSG00000206252 | 1053  | 0.85 | 0.72 | 0.0012   | 0.12   | NA |
| chr22 | 38484615 | 38485721 | BAIAP2L2     | ENSG00000128298 | -223  | 0.43 | 0.54 | 0.0013   | -0.11  | NA |
| chr22 | 19136293 | 19138512 | GSC2         | ENSG00000063515 | 394   | 0.23 | 0.17 | 0.0014   | 0.065  | NA |
| chr22 | 19165061 | 19166816 | SLC25A1      | ENSG00000100075 | 55    | 0.3  | 0.22 | 0.0018   | 0.08   | NA |
| chr22 | 45124981 | 45125855 | PRR5         | ENSG00000186654 | -1266 | 0.79 | 0.53 | 0.0019   | 0.26   | NA |

|       |          |          |                 |                 |      |      |      |        |        |    |
|-------|----------|----------|-----------------|-----------------|------|------|------|--------|--------|----|
| chr22 | 34315841 | 34318637 | LARGE           | ENSG00000133424 | -913 | 0.27 | 0.2  | 0.002  | 0.063  | NA |
| chr22 | 42394589 | 42395255 | WBP2NL          | ENSG00000183066 | 193  | 0.72 | 0.47 | 0.0021 | 0.26   | NA |
| chr22 | 19751653 | 19751909 | TBX1            | ENSG00000184058 | -821 | 0.98 | 0.87 | 0.0025 | 0.1    | NA |
| chr22 | 20103648 | 20103923 | TRMT2A          | ENSG00000099899 | -162 | 0.53 | 0.31 | 0.0026 | 0.22   | NA |
| chr22 | 22020132 | 22020652 | PPIL2           | ENSG00000100023 | 119  | 0.16 | 0.3  | 0.0029 | -0.14  | NA |
| chr22 | 18560558 | 18561410 | XXbac-B476C20.9 | ENSG00000225335 | -421 | 0.23 | 0.14 | 0.003  | 0.095  | NA |
| chr22 | 37414319 | 37416111 | TST             | ENSG00000128311 | 273  | 0.5  | 0.42 | 0.0031 | 0.082  | NA |
| chr22 | 38082302 | 38082796 | Z83844.2        | ENSG00000256872 | 219  | 0.41 | 0.17 | 0.0037 | 0.24   | NA |
| chr22 | 38965733 | 38966196 | DMC1            | ENSG00000100206 | 172  | 0.26 | 0.46 | 0.0038 | -0.2   | NA |
| chr22 | 21311336 | 21312201 | XXbac-B135H6.15 | ENSG00000237476 | 388  | 0.3  | 0.19 | 0.0039 | 0.1    | NA |
| chr22 | 50644615 | 50644879 | RP3-402G11.5    | ENSG00000073169 | -124 | 0.94 | 0.83 | 0.0039 | 0.11   | NA |
| chr22 | 50528201 | 50529085 | MOV10L1         | ENSG00000073146 | 335  | 0.61 | 0.52 | 0.0051 | 0.094  | NA |
| chr22 | 48884884 | 48887043 | FAM19A5         | ENSG00000219438 | 691  | 0.22 | 0.16 | 0.0052 | 0.063  | NA |
| chr22 | 50723670 | 50724235 | PLXNB2          | ENSG00000196576 | 320  | 1    | 0.67 | 0.0058 | 0.33   | NA |
| chr22 | 31063462 | 31064384 | DUSP18          | ENSG00000167065 | -127 | 0.15 | 0.23 | 0.0059 | -0.081 | NA |
| chr22 | 39715473 | 39715945 | RPL3            | ENSG00000100316 | -127 | 0.3  | 0.19 | 0.0062 | 0.11   | NA |
| chr22 | 19109068 | 19110329 | DGCR2           | ENSG00000070413 | 21   | 0.37 | 0.22 | 0.0063 | 0.14   | NA |
| chr22 | 42949592 | 42950304 | SERHL2          | ENSG00000183569 | 325  | 0.24 | 0.14 | 0.0074 | 0.099  | NA |
| chr22 | 50912550 | 50913857 | SBF1            | ENSG00000100241 | 75   | 0.27 | 0.4  | 0.0074 | -0.12  | NA |
| chr22 | 48970857 | 48972947 | FAM19A5         | ENSG00000219438 | -216 | 0.28 | 0.21 | 0.0075 | 0.071  | NA |
| chr22 | 40766459 | 40767033 | SGSM3           | ENSG00000100359 | 151  | 0.16 | 0.3  | 0.0084 | -0.13  | NA |
| chr22 | 50765047 | 50766109 | FAM116B         | ENSG00000205593 | -172 | 0.23 | 0.16 | 0.0094 | 0.077  | NA |
| chr22 | 30987605 | 30988384 | PES1            | ENSG00000100029 | -149 | 0.67 | 0.23 | 0.0095 | 0.44   | NA |
| chr22 | 43088918 | 43089668 | A4GALT          | ENSG00000128274 | 664  | 0.89 | 0.98 | 0.0099 | -0.089 | NA |
| chr22 | 41032129 | 41033272 | MKL1            | ENSG00000196588 | -47  | 0.34 | 0.21 | 0.01   | 0.13   | NA |
| chr22 | 24666580 | 24667475 | SPECC1L         | ENSG00000100014 | 241  | 0.28 | 0.18 | 0.011  | 0.1    | NA |
| chr22 | 29999396 | 30000153 | NF2             | ENSG00000186575 | 229  | 0.2  | 0.33 | 0.011  | -0.13  | NA |
| chr22 | 32870550 | 32871364 | FBXO7           | ENSG00000100225 | 294  | 0.2  | 0.29 | 0.011  | -0.095 | NA |
| chr22 | 42524731 | 42525908 | CYP2D6          | ENSG00000100197 | 592  | 0.91 | 0.8  | 0.011  | 0.11   | NA |
| chr22 | 39795628 | 39796171 | TAB1            | ENSG00000100324 | 153  | 0.33 | 0.18 | 0.012  | 0.15   | NA |

|       |          |          |                  |                 |      |      |      |       |        |    |
|-------|----------|----------|------------------|-----------------|------|------|------|-------|--------|----|
| chr22 | 23487368 | 23487970 | RAB36            | ENSG00000100228 | 156  | 0.31 | 0.22 | 0.013 | 0.091  | NA |
| chr22 | 32026297 | 32026874 | PISD             | ENSG00000241878 | 200  | 0.26 | 0.18 | 0.013 | 0.086  | NA |
| chr22 | 38200672 | 38201691 | H1F0             | ENSG00000189060 | 67   | 0.22 | 0.15 | 0.013 | 0.075  | NA |
| chr22 | 21354247 | 21354504 | THAP7            | ENSG00000184436 | 1432 | 0.74 | 0.35 | 0.014 | 0.39   | NA |
| chr22 | 24819537 | 24820810 | ADORA2A          | ENSG00000128271 | 608  | 0.3  | 0.36 | 0.014 | -0.065 | NA |
| chr22 | 37823011 | 37824119 | RP1-63G5.5       | ENSG00000243902 | -523 | 0.3  | 0.18 | 0.014 | 0.12   | NA |
| chr22 | 45705511 | 45706616 | FAM118A          | ENSG00000100376 | 335  | 0.21 | 0.14 | 0.014 | 0.068  | NA |
| chr22 | 46760450 | 46760679 | CELSR1           | ENSG00000075275 | 713  | 0.76 | 0.91 | 0.016 | -0.15  | NA |
| chr22 | 26985516 | 26986264 | TPST2            | ENSG00000128294 | 177  | 0.18 | 0.35 | 0.018 | -0.17  | NA |
| chr22 | 31885140 | 31886292 | EIF4ENIF1        | ENSG00000184708 | -488 | 0.21 | 0.14 | 0.018 | 0.075  | NA |
| chr22 | 50946353 | 50947010 | NCAPH2           | ENSG00000025770 | 36   | 0.21 | 0.42 | 0.018 | -0.21  | NA |
| chr22 | 20939102 | 20939353 | MED15            | ENSG00000099917 | -6   | 0.79 | 0.96 | 0.019 | -0.17  | NA |
| chr22 | 36782965 | 36784492 | MYH9             | ENSG00000100345 | 335  | 0.24 | 0.17 | 0.019 | 0.066  | NA |
| chr22 | 29976920 | 29977216 | NIPSNAP1         | ENSG00000184117 | -53  | 0.13 | 0.23 | 0.023 | -0.099 | NA |
| chr22 | 41777430 | 41778281 | TEF              | ENSG00000167074 | -78  | 0.16 | 0.26 | 0.023 | -0.097 | NA |
| chr22 | 51221772 | 51222317 | RABL2B           | ENSG00000079974 | -16  | 0.31 | 0.12 | 0.024 | 0.18   | NA |
| chr22 | 44419824 | 44420790 | PARVB            | ENSG00000188677 | 150  | 0.22 | 0.15 | 0.025 | 0.062  | NA |
| chr22 | 21996241 | 21997332 | SDF2L1           | ENSG00000128228 | 236  | 0.16 | 0.21 | 0.026 | -0.053 | NA |
| chr22 | 44207947 | 44208435 | EFCAB6           | ENSG00000186976 | -121 | 0.17 | 0.25 | 0.028 | -0.088 | NA |
| chr22 | 50716018 | 50716656 | PLXNB2           | ENSG00000196576 | 932  | 0.94 | 0.82 | 0.028 | 0.12   | NA |
| chr22 | 40440852 | 40441810 | TNRC6B           | ENSG00000100354 | -147 | 0.16 | 0.23 | 0.029 | -0.066 | NA |
| chr22 | 25081850 | 25082112 | AP000357.5       | ENSG00000224806 | -154 | 0.19 | 0.43 | 0.031 | -0.24  | NA |
| chr22 | 31494658 | 31495175 | SMTN             | ENSG00000183963 | -732 | 0.8  | 0.64 | 0.031 | 0.16   | NA |
| chr22 | 37171766 | 37172669 | IFT27            | ENSG00000100360 | -70  | 0.73 | 0.31 | 0.031 | 0.42   | NA |
| chr22 | 37594665 | 37595488 | C1QTNF6          | ENSG00000133466 | 349  | 0.2  | 0.35 | 0.031 | -0.14  | NA |
| chr22 | 41215135 | 41215576 | SLC25A17         | ENSG00000100372 | -64  | 0.27 | 0.18 | 0.031 | 0.09   | NA |
| chr22 | 46067451 | 46068490 | ATXN10           | ENSG00000130638 | 292  | 0.24 | 0.17 | 0.033 | 0.077  | NA |
| chr22 | 20286318 | 20287630 | XXbac-B444P24.10 | ENSG00000161132 | -309 | 0.31 | 0.24 | 0.034 | 0.071  | NA |
| chr22 | 26565199 | 26565986 | SEZ6L            | ENSG00000100095 | 152  | 0.18 | 0.26 | 0.036 | -0.08  | NA |
| chr22 | 31795250 | 31795958 | DRG1             | ENSG00000185721 | 95   | 0.15 | 0.31 | 0.036 | -0.17  | NA |



|       |          |          |             |                 |       |      |      |       |        |    |
|-------|----------|----------|-------------|-----------------|-------|------|------|-------|--------|----|
| chr22 | 45560511 | 45560783 | NUP50       | ENSG00000093000 | 131   | 0.3  | 0.19 | 0.037 | 0.11   | NA |
| chr22 | 26895185 | 26895460 | TFIP11      | ENSG00000100109 | 35    | 0.97 | 0.9  | 0.039 | 0.072  | NA |
| chr22 | 38610335 | 38610828 | MAFF        | ENSG00000185022 | 1039  | 0.16 | 0.3  | 0.044 | -0.14  | NA |
| chr22 | 38901553 | 38902905 | DDX17       | ENSG00000100201 | -323  | 0.21 | 0.16 | 0.048 | 0.052  | NA |
| chr22 | 42475474 | 42476094 | C22orf32    | ENSG00000183172 | 89    | 0.31 | 0.21 | 0.052 | 0.095  | NA |
| chr22 | 21024739 | 21025482 | FAM108A5P   | ENSG00000229107 | 162   | 0.71 | 0.62 | 0.053 | 0.095  | NA |
| chr22 | 21355973 | 21356824 | THAP7       | ENSG00000184436 | -367  | 0.25 | 0.17 | 0.053 | 0.086  | NA |
| chr22 | 43547319 | 43548169 | TSPO        | ENSG00000100300 | 224   | 0.27 | 0.2  | 0.055 | 0.067  | NA |
| chr22 | 29168628 | 29169048 | CCDC117     | ENSG00000159873 | 176   | 0.22 | 0.13 | 0.06  | 0.096  | NA |
| chr22 | 35653361 | 35654028 | HMGXB4      | ENSG00000100281 | 249   | 0.23 | 0.17 | 0.061 | 0.062  | NA |
| chr22 | 41939917 | 41940713 | POLR3H      | ENSG00000100413 | 75    | 0.21 | 0.38 | 0.064 | -0.17  | NA |
| chr22 | 37815803 | 37816477 | RP1-63G5.5  | ENSG00000243902 | 344   | 0.19 | 0.26 | 0.065 | -0.078 | NA |
| chr22 | 21043660 | 21043946 | POM121L4P   | ENSG00000217261 | -516  | 0.8  | 1    | 0.066 | -0.2   | NA |
| chr22 | 17897854 | 17898287 | AC004019.10 | ENSG00000229492 | 326   | 1    | 0.92 | 0.067 | 0.083  | NA |
| chr22 | 45809191 | 45809953 | SMC1B       | ENSG00000077935 | -124  | 0.36 | 0.46 | 0.067 | -0.1   | NA |
| chr22 | 41487261 | 41489159 | EP300       | ENSG00000100393 | 420   | 0.18 | 0.21 | 0.068 | -0.038 | NA |
| chr22 | 43045009 | 43045679 | CYB5R3      | ENSG00000100243 | 230   | 0.22 | 0.16 | 0.07  | 0.061  | NA |
| chr22 | 30752583 | 30753214 | CCDC157     | ENSG00000187860 | 274   | 0.26 | 0.18 | 0.072 | 0.081  | NA |
| chr22 | 44257942 | 44258612 | SULT4A1     | ENSG00000130540 | 9     | 0.21 | 0.16 | 0.073 | 0.051  | NA |
| chr22 | 19131992 | 19132297 | DGCR14      | ENSG00000100056 | 2     | 0.24 | 0.4  | 0.075 | -0.17  | NA |
| chr22 | 25800554 | 25801437 | LRP5L       | ENSG00000100068 | 349   | 0.24 | 0.18 | 0.075 | 0.063  | NA |
| chr22 | 43582679 | 43583067 | TTLL12      | ENSG00000100304 | 259   | 0.24 | 0.14 | 0.075 | 0.095  | NA |
| chr22 | 22006079 | 22007048 | PPIL2       | ENSG00000100023 | 4     | 0.22 | 0.17 | 0.077 | 0.055  | NA |
| chr22 | 42764389 | 42765248 | Z83851.1    | ENSG00000229891 | 356   | 0.18 | 0.24 | 0.08  | -0.069 | NA |
| chr22 | 46545480 | 46547412 | PPARA       | ENSG00000186951 | 22    | 0.21 | 0.18 | 0.082 | 0.039  | NA |
| chr22 | 50607823 | 50608040 | PANX2       | ENSG00000073150 | -1229 | 0.31 | 0.2  | 0.082 | 0.11   | NA |
| chr22 | 25960959 | 25961368 | ADRBK2      | ENSG00000100077 | 89    | 0.24 | 0.15 | 0.085 | 0.087  | NA |
| chr22 | 49088758 | 49088962 | FAM19A5     | ENSG00000219438 | -199  | 0.97 | 0.84 | 0.086 | 0.13   | NA |
| chr22 | 50008958 | 50009712 | RP1-29C18.8 | ENSG00000235111 | 29    | 0.98 | 0.95 | 0.087 | 0.034  | NA |
| chr22 | 50944354 | 50944606 | LMF2        | ENSG00000100258 | 169   | 0.87 | 0.78 | 0.089 | 0.083  | NA |

|       |          |          |                 |                 |       |      |      |       |        |    |
|-------|----------|----------|-----------------|-----------------|-------|------|------|-------|--------|----|
| chr22 | 45182016 | 45182223 | ARHGAP8         | ENSG00000241484 | -218  | 1    | 0.82 | 0.09  | 0.18   | NA |
| chr22 | 35935981 | 35937537 | RASD2           | ENSG00000100302 | -156  | 0.29 | 0.23 | 0.094 | 0.056  | NA |
| chr22 | 38850766 | 38851285 | KCNJ4           | ENSG00000168135 | 180   | 0.19 | 0.14 | 0.094 | 0.055  | NA |
| chr22 | 22306554 | 22307402 | PPM1F           | ENSG00000100034 | 215   | 0.17 | 0.26 | 0.1   | -0.09  | NA |
| chr22 | 24988593 | 24989279 | C22orf36        | ENSG00000178026 | 65    | 0.24 | 0.18 | 0.1   | 0.068  | NA |
| chr22 | 30938016 | 30938645 | SIRPAP1         | ENSG00000225774 | -193  | 0.22 | 0.37 | 0.1   | -0.15  | NA |
| chr22 | 17639481 | 17640714 | CECR5           | ENSG00000069998 | -221  | 0.24 | 0.19 | 0.11  | 0.054  | NA |
| chr22 | 20790638 | 20792665 | SCARF2          | ENSG00000244486 | 461   | 0.18 | 0.15 | 0.11  | 0.03   | NA |
| chr22 | 30821625 | 30822010 | MTFP1           | ENSG00000242114 | 54    | 0.18 | 0.13 | 0.11  | 0.057  | NA |
| chr22 | 42915512 | 42915999 | RRP7A           | ENSG00000189306 | 45    | 0.24 | 0.13 | 0.11  | 0.11   | NA |
| chr22 | 43738882 | 43740285 | SCUBE1          | ENSG00000159307 | -294  | 0.23 | 0.19 | 0.11  | 0.041  | NA |
| chr22 | 50609181 | 50609627 | PANX2           | ENSG00000073150 | 214   | 0.18 | 0.32 | 0.11  | -0.15  | NA |
| chr22 | 51020656 | 51021817 | CHKB            | ENSG00000100288 | -387  | 0.24 | 0.2  | 0.11  | 0.045  | NA |
| chr22 | 19418745 | 19420237 | HIRA            | ENSG00000100084 | -272  | 0.17 | 0.13 | 0.12  | 0.038  | NA |
| chr22 | 42342407 | 42343278 | CENPM           | ENSG00000100162 | -150  | 0.21 | 0.11 | 0.12  | 0.092  | NA |
| chr22 | 23730282 | 23730537 | CES5AP1         | ENSG00000215478 | -491  | 0.65 | 0.81 | 0.13  | -0.16  | NA |
| chr22 | 31741045 | 31743707 | PATZ1           | ENSG00000100105 | -614  | 0.24 | 0.21 | 0.13  | 0.033  | NA |
| chr22 | 39052054 | 39053054 | RP1-199H16.5    | ENSG00000184949 | -271  | 0.33 | 0.26 | 0.13  | 0.068  | NA |
| chr22 | 50657480 | 50657937 | TUBGCP6         | ENSG00000128159 | 1137  | 0.39 | 0.29 | 0.13  | 0.097  | NA |
| chr22 | 29075100 | 29076219 | TTC28           | ENSG00000100154 | 141   | 0.27 | 0.22 | 0.14  | 0.048  | NA |
| chr22 | 44319578 | 44320513 | PNPLA3          | ENSG00000100344 | 426   | 0.17 | 0.22 | 0.14  | -0.048 | NA |
| chr22 | 46663605 | 46664126 | TTC38           | ENSG00000075234 | 7     | 0.2  | 0.15 | 0.14  | 0.051  | NA |
| chr22 | 50658993 | 50659400 | TUBGCP6         | ENSG00000128159 | -351  | 0.97 | 0.93 | 0.14  | 0.04   | NA |
| chr22 | 18506419 | 18507412 | XXbac-B461K10.4 | ENSG00000093100 | 410   | 0.17 | 0.26 | 0.15  | -0.087 | NA |
| chr22 | 19746924 | 19747141 | TBX1            | ENSG00000184058 | -1688 | 0.17 | 0.26 | 0.15  | -0.093 | NA |
| chr22 | 24407673 | 24408060 | CABIN1          | ENSG00000099991 | 101   | 0.12 | 0.23 | 0.15  | -0.11  | NA |
| chr22 | 29949478 | 29949824 | THOC5           | ENSG00000100296 | -7    | 0.3  | 0.2  | 0.15  | 0.09   | NA |
| chr22 | 38054403 | 38055450 | PDXP            | ENSG00000241360 | 192   | 0.13 | 0.16 | 0.15  | -0.037 | NA |
| chr22 | 40814816 | 40815102 | MKL1            | ENSG00000196588 | -1221 | 0.91 | 0.81 | 0.15  | 0.096  | NA |
| chr22 | 43116151 | 43117121 | A4GALT          | ENSG00000128274 | 668   | 0.29 | 0.24 | 0.15  | 0.048  | NA |

|       |          |          |                  |                 |       |      |      |      |        |    |
|-------|----------|----------|------------------|-----------------|-------|------|------|------|--------|----|
| chr22 | 50448567 | 50449521 | IL17REL          | ENSG00000188263 | -1923 | 0.61 | 0.54 | 0.15 | 0.07   | NA |
| chr22 | 50708190 | 50710490 | MAPK11           | ENSG00000185386 | -547  | 0.24 | 0.21 | 0.15 | 0.033  | NA |
| chr22 | 32439046 | 32439442 | SLC5A1           | ENSG00000100170 | 225   | 0.66 | 0.49 | 0.16 | 0.17   | NA |
| chr22 | 37212769 | 37213467 | PVALB            | ENSG00000100362 | -73   | 0.33 | 0.24 | 0.16 | 0.093  | NA |
| chr22 | 39096373 | 39097754 | JOSD1            | ENSG00000100221 | -391  | 0.22 | 0.17 | 0.16 | 0.048  | NA |
| chr22 | 45898294 | 45899357 | FBLN1            | ENSG00000077942 | 113   | 0.25 | 0.21 | 0.16 | 0.041  | NA |
| chr22 | 47014288 | 47014698 | GRAMD4           | ENSG00000075240 | -1806 | 0.88 | 0.93 | 0.16 | -0.053 | NA |
| chr22 | 47022752 | 47023210 | GRAMD4           | ENSG00000075240 | 241   | 0.97 | 1    | 0.16 | -0.028 | NA |
| chr22 | 50699469 | 50700358 | MAPK12           | ENSG00000188130 | -341  | 0.25 | 0.2  | 0.16 | 0.049  | NA |
| chr22 | 39745983 | 39746634 | SYNGR1           | ENSG00000100321 | 316   | 0.3  | 0.21 | 0.17 | 0.095  | NA |
| chr22 | 38577678 | 38578071 | PLA2G6           | ENSG00000184381 | -119  | 0.32 | 0.11 | 0.18 | 0.21   | NA |
| chr22 | 46731379 | 46732337 | TRMU             | ENSG00000100416 | 216   | 0.2  | 0.15 | 0.18 | 0.046  | NA |
| chr22 | 50745415 | 50746125 | PLXNB2           | ENSG00000196576 | 247   | 0.36 | 0.27 | 0.18 | 0.089  | NA |
| chr22 | 22336948 | 22337333 | TOP3B            | ENSG00000100038 | 7     | 0.16 | 0.25 | 0.19 | -0.089 | NA |
| chr22 | 31892036 | 31893097 | EIF4ENIF1        | ENSG00000184708 | -472  | 0.19 | 0.16 | 0.19 | 0.035  | NA |
| chr22 | 39267539 | 39269160 | CBX6             | ENSG00000183741 | -128  | 0.19 | 0.22 | 0.19 | -0.035 | NA |
| chr22 | 43485057 | 43485545 | TTL1             | ENSG00000100271 | 43    | 0.15 | 0.22 | 0.2  | -0.066 | NA |
| chr22 | 38597785 | 38598988 | MAFF             | ENSG00000185022 | 497   | 0.25 | 0.29 | 0.21 | -0.039 | NA |
| chr22 | 38793180 | 38793451 | RP3-449O17.1     | ENSG00000244627 | 135   | 1    | 0.44 | 0.21 | 0.56   | NA |
| chr22 | 50170669 | 50170951 | BRD1             | ENSG00000100425 | -1047 | 0.57 | 0.48 | 0.21 | 0.09   | NA |
| chr22 | 17516913 | 17518500 | CECR7            | ENSG00000237438 | 246   | 0.41 | 0.48 | 0.22 | -0.071 | NA |
| chr22 | 18121280 | 18122009 | BCL2L13          | ENSG00000099968 | 288   | 0.24 | 0.31 | 0.22 | -0.066 | NA |
| chr22 | 32057922 | 32058323 | PISD             | ENSG00000241878 | 44    | 0.32 | 0.21 | 0.22 | 0.1    | NA |
| chr22 | 21399979 | 21400270 | AC002472.13      | ENSG00000187905 | -125  | 0.28 | 0.2  | 0.23 | 0.078  | NA |
| chr22 | 24199058 | 24200206 | SLC2A11          | ENSG00000133460 | 573   | 0.18 | 0.15 | 0.23 | 0.034  | NA |
| chr22 | 42665452 | 42667419 | Z83851.3         | ENSG00000182057 | 676   | 0.32 | 0.28 | 0.23 | 0.04   | NA |
| chr22 | 43506500 | 43507610 | BIK              | ENSG00000100290 | 301   | 0.22 | 0.18 | 0.23 | 0.037  | NA |
| chr22 | 46481815 | 46482024 | RP4-695O20__B.10 | ENSG00000197182 | 42    | 0.23 | 0.37 | 0.23 | -0.15  | NA |
| chr22 | 46692210 | 46693349 | GTSE1            | ENSG00000075218 | 141   | 0.18 | 0.22 | 0.23 | -0.042 | NA |
| chr22 | 32807825 | 32808285 | C22orf28         | ENSG00000100220 | 169   | 0.28 | 0.19 | 0.24 | 0.086  | NA |

|       |          |          |               |                 |      |      |      |      |        |    |
|-------|----------|----------|---------------|-----------------|------|------|------|------|--------|----|
| chr22 | 47158067 | 47158980 | TBC1D22A      | ENSG00000054611 | 5    | 0.23 | 0.27 | 0.24 | -0.04  | NA |
| chr22 | 29784169 | 29784779 | AP1B1         | ENSG00000100280 | 44   | 0.15 | 0.19 | 0.25 | -0.041 | NA |
| chr22 | 31031358 | 31032059 | SLC35E4       | ENSG00000100036 | 69   | 0.34 | 0.25 | 0.25 | 0.086  | NA |
| chr22 | 36718450 | 36718760 | MYH9          | ENSG00000100345 | -638 | 0.94 | 0.99 | 0.25 | -0.047 | NA |
| chr22 | 41346636 | 41347759 | RBX1          | ENSG00000100387 | -154 | 0.25 | 0.32 | 0.25 | -0.076 | NA |
| chr22 | 42896636 | 42897041 | SERHL         | ENSG00000172250 | 207  | 0.19 | 0.29 | 0.25 | -0.1   | NA |
| chr22 | 50608207 | 50608660 | PANX2         | ENSG00000073150 | -727 | 0.32 | 0.23 | 0.25 | 0.09   | NA |
| chr22 | 19278671 | 19279573 | CLTCL1        | ENSG00000070371 | 62   | 0.18 | 0.13 | 0.26 | 0.042  | NA |
| chr22 | 19434797 | 19435556 | HIRA          | ENSG00000100084 | -203 | 0.21 | 0.18 | 0.26 | 0.03   | NA |
| chr22 | 38035350 | 38035928 | SH3BP1        | ENSG00000100092 | 157  | 0.24 | 0.29 | 0.26 | -0.053 | NA |
| chr22 | 17081936 | 17082595 | AC005301.5    | ENSG00000100181 | -536 | 0.17 | 0.14 | 0.27 | 0.029  | NA |
| chr22 | 36850893 | 36851466 | RP5-1119A7.14 | ENSG00000228719 | -188 | 0.25 | 0.2  | 0.27 | 0.058  | NA |
| chr22 | 43252653 | 43253667 | ARFGAP3       | ENSG00000242247 | 85   | 0.24 | 0.2  | 0.27 | 0.038  | NA |
| chr22 | 25755941 | 25756164 | LRP5L         | ENSG00000100068 | 104  | 0.86 | 0.98 | 0.28 | -0.12  | NA |
| chr22 | 36924935 | 36925640 | EIF3D         | ENSG00000100353 | -343 | 0.23 | 0.28 | 0.28 | -0.048 | NA |
| chr22 | 31480774 | 31481373 | SMTN          | ENSG00000183963 | 91   | 0.27 | 0.21 | 0.29 | 0.052  | NA |
| chr22 | 19466308 | 19467811 | UFD1L         | ENSG00000070010 | -605 | 0.27 | 0.23 | 0.3  | 0.041  | NA |
| chr22 | 25507309 | 25507537 | CTA-221G9.11  | ENSG00000203280 | 1236 | 1    | 0.33 | 0.3  | 0.67   | NA |
| chr22 | 30162836 | 30163532 | ZMAT5         | ENSG00000100319 | -234 | 0.32 | 0.23 | 0.3  | 0.086  | NA |
| chr22 | 30685195 | 30685904 | GATSL3        | ENSG00000239282 | -64  | 0.24 | 0.31 | 0.3  | -0.071 | NA |
| chr22 | 42228507 | 42229984 | SREBF2        | ENSG00000198911 | 136  | 0.2  | 0.23 | 0.3  | -0.027 | NA |
| chr22 | 29601547 | 29602291 | EMID1         | ENSG00000186998 | 79   | 0.24 | 0.2  | 0.31 | 0.035  | NA |
| chr22 | 43410421 | 43411510 | PACSIN2       | ENSG00000100266 | 139  | 0.29 | 0.24 | 0.31 | 0.054  | NA |
| chr22 | 31556124 | 31556466 | RNF185        | ENSG00000138942 | 127  | 0.23 | 0.16 | 0.32 | 0.076  | NA |
| chr22 | 33197380 | 33198267 | TIMP3         | ENSG00000100234 | 136  | 0.2  | 0.16 | 0.32 | 0.045  | NA |
| chr22 | 51038494 | 51039752 | MAPK8IP2      | ENSG00000008735 | 9    | 0.16 | 0.19 | 0.32 | -0.025 | NA |
| chr22 | 41842383 | 41843919 | TOB2          | ENSG00000183864 | -362 | 0.2  | 0.17 | 0.33 | 0.025  | NA |
| chr22 | 42084641 | 42085014 | NHP2L1        | ENSG00000100138 | -19  | 0.16 | 0.23 | 0.33 | -0.073 | NA |
| chr22 | 32339933 | 32341192 | YWHAH         | ENSG00000128245 | 115  | 0.21 | 0.18 | 0.34 | 0.03   | NA |
| chr22 | 38141761 | 38142999 | TRIOBP        | ENSG00000100106 | 145  | 0.23 | 0.2  | 0.34 | 0.029  | NA |

|       |          |          |               |                 |      |      |      |      |        |    |
|-------|----------|----------|---------------|-----------------|------|------|------|------|--------|----|
| chr22 | 46972461 | 46973609 | GRAMD4        | ENSG00000075240 | 9    | 0.23 | 0.2  | 0.34 | 0.03   | NA |
| chr22 | 50311768 | 50312953 | CRELD2        | ENSG00000184164 | 545  | 0.2  | 0.23 | 0.34 | -0.027 | NA |
| chr22 | 18923470 | 18923840 | PRODH         | ENSG00000100033 | 0    | 0.14 | 0.22 | 0.35 | -0.077 | NA |
| chr22 | 19701514 | 19701891 | 5-Sep         | ENSG00000184702 | -285 | 0.2  | 0.15 | 0.35 | 0.047  | NA |
| chr22 | 25574876 | 25575542 | CTA-221G9.10  | ENSG00000236650 | -482 | 0.8  | 0.65 | 0.35 | 0.15   | NA |
| chr22 | 51001199 | 51001515 | C22orf41      | ENSG00000217442 | -23  | 0.2  | 0.16 | 0.35 | 0.045  | NA |
| chr22 | 42486349 | 42487246 | RP4-669P10.18 | ENSG00000237037 | -140 | 0.21 | 0.14 | 0.36 | 0.065  | NA |
| chr22 | 29663622 | 29664903 | RHBDD3        | ENSG00000100263 | -545 | 0.21 | 0.24 | 0.37 | -0.029 | NA |
| chr22 | 47069523 | 47069800 | GRAMD4        | ENSG00000075240 | -844 | 0.92 | 0.97 | 0.37 | -0.041 | NA |
| chr22 | 17488274 | 17489194 | GAB4          | ENSG00000215568 | 155  | 0.66 | 0.61 | 0.38 | 0.048  | NA |
| chr22 | 30278978 | 30279858 | MTMR3         | ENSG00000100330 | 274  | 0.19 | 0.21 | 0.4  | -0.029 | NA |
| chr22 | 39077816 | 39078400 | RP3-508I15.9  | ENSG00000228274 | -283 | 0.25 | 0.19 | 0.41 | 0.058  | NA |
| chr22 | 20104374 | 20105729 | TRMT2A        | ENSG00000099899 | -345 | 0.18 | 0.2  | 0.44 | -0.02  | NA |
| chr22 | 39928303 | 39929071 | RPS19BP1      | ENSG00000187051 | 50   | 0.25 | 0.22 | 0.44 | 0.037  | NA |
| chr22 | 16374539 | 16374899 | LA16c-2F2.8   | ENSG00000230471 | 1638 | 0.6  | 0.51 | 0.45 | 0.096  | NA |
| chr22 | 39853323 | 39854065 | MGAT3         | ENSG00000128268 | 345  | 0.64 | 0.66 | 0.45 | -0.023 | NA |
| chr22 | 30783010 | 30783620 | RNF215        | ENSG00000099999 | -201 | 0.25 | 0.3  | 0.46 | -0.05  | NA |
| chr22 | 35776988 | 35777221 | HMOX1         | ENSG00000100292 | 18   | 0.17 | 0.23 | 0.46 | -0.054 | NA |
| chr22 | 42466407 | 42467121 | NAGA          | ENSG00000198951 | 70   | 0.21 | 0.16 | 0.46 | 0.044  | NA |
| chr22 | 21871023 | 21872569 | PI4KAP2       | ENSG00000183506 | -26  | 1    | 0.67 | 0.47 | 0.33   | NA |
| chr22 | 38863881 | 38864263 | KDELR3        | ENSG00000100196 | 5    | 0.16 | 0.12 | 0.47 | 0.039  | NA |
| chr22 | 21386493 | 21387000 | SLC7A4        | ENSG00000099960 | 92   | 0.33 | 0.38 | 0.48 | -0.052 | NA |
| chr22 | 23412224 | 23413597 | GNAZ          | ENSG00000128266 | 370  | 0.23 | 0.2  | 0.48 | 0.033  | NA |
| chr22 | 20254889 | 20255692 | RTN4R         | ENSG00000040608 | -78  | 0.28 | 0.21 | 0.49 | 0.074  | NA |
| chr22 | 23908322 | 23909178 | AP000345.2    | ENSG00000224277 | -501 | 0.17 | 0.2  | 0.49 | -0.029 | NA |
| chr22 | 37447689 | 37448238 | KCTD17        | ENSG00000100379 | 184  | 0.26 | 0.22 | 0.49 | 0.04   | NA |
| chr22 | 39548613 | 39549666 | CBX7          | ENSG00000100307 | -484 | 0.2  | 0.18 | 0.5  | 0.022  | NA |
| chr22 | 43538913 | 43539526 | MCAT          | ENSG00000100294 | 67   | 0.14 | 0.17 | 0.5  | -0.03  | NA |
| chr22 | 38528820 | 38529084 | PLA2G6        | ENSG00000184381 | -68  | 0.94 | 0.91 | 0.51 | 0.034  | NA |
| chr22 | 30901242 | 30901744 | SEC14L4       | ENSG00000133488 | 144  | 0.41 | 0.52 | 0.52 | -0.11  | NA |

|       |          |          |               |                 |      |      |      |      |        |    |
|-------|----------|----------|---------------|-----------------|------|------|------|------|--------|----|
| chr22 | 37769170 | 37771587 | ELFN2         | ENSG00000166897 | 1201 | 0.98 | 0.97 | 0.52 | 0.0074 | NA |
| chr22 | 42322043 | 42322909 | TNFRSF13C     | ENSG00000159958 | 346  | 0.22 | 0.24 | 0.52 | -0.023 | NA |
| chr22 | 24551813 | 24552696 | CABIN1        | ENSG00000099991 | 282  | 0.21 | 0.19 | 0.53 | 0.027  | NA |
| chr22 | 29279412 | 29280287 | ZNRF3         | ENSG00000183579 | 269  | 0.18 | 0.16 | 0.53 | 0.018  | NA |
| chr22 | 31608021 | 31608528 | LIMK2         | ENSG00000182541 | 49   | 0.24 | 0.19 | 0.53 | 0.049  | NA |
| chr22 | 38712684 | 38713333 | CSNK1E        | ENSG00000213923 | -30  | 0.2  | 0.24 | 0.53 | -0.04  | NA |
| chr22 | 43807400 | 43808455 | MPPED1        | ENSG00000186732 | -92  | 0.29 | 0.25 | 0.53 | 0.034  | NA |
| chr22 | 46440393 | 46441019 | RP11-398F12.1 | ENSG00000231711 | -216 | 0.22 | 0.25 | 0.54 | -0.03  | NA |
| chr22 | 50221335 | 50221593 | BRD1          | ENSG00000100425 | -304 | 0.26 | 0.16 | 0.54 | 0.1    | NA |
| chr22 | 16867374 | 16868185 | ABCD1P4       | ENSG00000225293 | -641 | 0.47 | 0.54 | 0.55 | -0.064 | NA |
| chr22 | 18256615 | 18257377 | BID           | ENSG00000015475 | -214 | 0.2  | 0.18 | 0.55 | 0.022  | NA |
| chr22 | 24129097 | 24129697 | SMARCB1       | ENSG00000099956 | 247  | 0.25 | 0.29 | 0.55 | -0.041 | NA |
| chr22 | 50682860 | 50683640 | TUBGCP6       | ENSG00000128159 | -257 | 0.22 | 0.25 | 0.55 | -0.035 | NA |
| chr22 | 21921936 | 21922715 | UBE2L3        | ENSG00000185651 | 306  | 0.27 | 0.24 | 0.56 | 0.033  | NA |
| chr22 | 41593023 | 41593915 | RP1-85F18.5   | ENSG00000231993 | -9   | 0.24 | 0.22 | 0.56 | 0.025  | NA |
| chr22 | 46759899 | 46760121 | CELSR1        | ENSG00000075275 | 1267 | 0.88 | 0.95 | 0.56 | -0.075 | NA |
| chr22 | 29137866 | 29138560 | HSCB          | ENSG00000100209 | 194  | 0.26 | 0.23 | 0.57 | 0.029  | NA |
| chr22 | 29709281 | 29712013 | RASL10A       | ENSG00000100276 | -352 | 0.26 | 0.25 | 0.57 | 0.011  | NA |
| chr22 | 29196082 | 29196962 | XBP1          | ENSG00000100219 | -401 | 0.21 | 0.18 | 0.58 | 0.025  | NA |
| chr22 | 18893251 | 18894291 | DGCR6         | ENSG00000183628 | 230  | 0.2  | 0.22 | 0.59 | -0.018 | NA |
| chr22 | 20849594 | 20850404 | KLHL22        | ENSG00000099910 | 80   | 0.2  | 0.22 | 0.6  | -0.018 | NA |
| chr22 | 51111935 | 51113742 | AC000036.5    | ENSG00000099882 | -5   | 0.22 | 0.2  | 0.6  | 0.018  | NA |
| chr22 | 19510871 | 19512254 | CLDN5         | ENSG00000184113 | 1344 | 0.18 | 0.16 | 0.61 | 0.014  | NA |
| chr22 | 42078060 | 42078549 | NHP2L1        | ENSG00000100138 | 156  | 0.54 | 0.65 | 0.61 | -0.11  | NA |
| chr22 | 39101825 | 39102668 | GTPBP1        | ENSG00000100226 | 292  | 0.18 | 0.15 | 0.62 | 0.03   | NA |
| chr22 | 40742403 | 40742944 | ADSL          | ENSG00000239900 | 166  | 0.19 | 0.17 | 0.62 | 0.023  | NA |
| chr22 | 28314588 | 28315958 | PITPNB        | ENSG00000180957 | -158 | 0.21 | 0.19 | 0.63 | 0.017  | NA |
| chr22 | 41697388 | 41698601 | ZC3H7B        | ENSG00000100403 | 468  | 0.17 | 0.16 | 0.63 | 0.015  | NA |
| chr22 | 50919453 | 50920376 | ADM2          | ENSG00000128165 | -71  | 0.19 | 0.18 | 0.63 | 0.016  | NA |
| chr22 | 19974274 | 19974756 | ARVCF         | ENSG00000099889 | 101  | 0.2  | 0.24 | 0.64 | -0.037 | NA |

|       |          |          |              |                 |       |      |      |      |        |    |
|-------|----------|----------|--------------|-----------------|-------|------|------|------|--------|----|
| chr22 | 30792887 | 30793312 | SEC14L2      | ENSG00000100003 | 169   | 0.2  | 0.27 | 0.64 | -0.072 | NA |
| chr22 | 22471899 | 22472744 | FAM108A6P    | ENSG00000182502 | 53    | 0.67 | 0.65 | 0.66 | 0.021  | NA |
| chr22 | 26824978 | 26825680 | ASPHD2       | ENSG00000128203 | 90    | 0.16 | 0.15 | 0.66 | 0.016  | NA |
| chr22 | 39239168 | 39240425 | NPTXR        | ENSG00000221890 | 191   | 0.19 | 0.18 | 0.66 | 0.012  | NA |
| chr22 | 46762735 | 46762970 | CELSR1       | ENSG00000075275 | -1575 | 0.79 | 0.75 | 0.66 | 0.037  | NA |
| chr22 | 21271363 | 21272616 | CRKL         | ENSG00000099942 | 275   | 0.19 | 0.21 | 0.67 | -0.015 | NA |
| chr22 | 24093026 | 24093621 | ZNF70        | ENSG00000187792 | -44   | 0.27 | 0.31 | 0.67 | -0.039 | NA |
| chr22 | 22089624 | 22090909 | YPEL1        | ENSG00000100027 | -222  | 0.24 | 0.22 | 0.68 | 0.018  | NA |
| chr22 | 38004443 | 38005271 | GGA1         | ENSG00000100083 | 376   | 0.29 | 0.26 | 0.68 | 0.03   | NA |
| chr22 | 41985525 | 41986045 | PMM1         | ENSG00000100417 | 15    | 0.25 | 0.21 | 0.68 | 0.036  | NA |
| chr22 | 24950798 | 24952074 | C22orf13     | ENSG00000138867 | -379  | 0.23 | 0.25 | 0.69 | -0.02  | NA |
| chr22 | 31500396 | 31501239 | RP3-412A9.11 | ENSG00000198832 | 933   | 0.64 | 0.61 | 0.69 | 0.034  | NA |
| chr22 | 50869663 | 50869892 | PPP6R2       | ENSG00000100239 | 183   | 0.91 | 0.86 | 0.69 | 0.042  | NA |
| chr22 | 20307109 | 20308026 | DGCR6L       | ENSG00000128185 | -35   | 0.26 | 0.3  | 0.7  | -0.047 | NA |
| chr22 | 30233923 | 30234399 | ASCC2        | ENSG00000100325 | 56    | 0.15 | 0.17 | 0.7  | -0.019 | NA |
| chr22 | 31198491 | 31199033 | OSBP2        | ENSG00000184792 | -311  | 0.15 | 0.18 | 0.7  | -0.032 | NA |
| chr22 | 38668385 | 38669223 | TMEM184B     | ENSG00000198792 | -134  | 0.23 | 0.21 | 0.7  | 0.021  | NA |
| chr22 | 20118509 | 20119625 | ZDHHC8       | ENSG00000099904 | -263  | 0.22 | 0.24 | 0.71 | -0.02  | NA |
| chr22 | 44350902 | 44351662 | SAMM50       | ENSG00000100347 | -19   | 0.2  | 0.22 | 0.71 | -0.021 | NA |
| chr22 | 18632736 | 18632998 | USP18        | ENSG00000184979 | 201   | 0.2  | 0.24 | 0.72 | -0.041 | NA |
| chr22 | 22577657 | 22577912 | TOP3B2       | ENSG00000228050 | 1175  | 1    | 0.92 | 0.72 | 0.083  | NA |
| chr22 | 31090200 | 31091334 | OSBP2        | ENSG00000184792 | -26   | 0.23 | 0.21 | 0.72 | 0.021  | NA |
| chr22 | 50220118 | 50220822 | BRD1         | ENSG00000100425 | 690   | 0.23 | 0.2  | 0.72 | 0.028  | NA |
| chr22 | 38239792 | 38240409 | ANKRD54      | ENSG00000100124 | -211  | 0.2  | 0.22 | 0.73 | -0.023 | NA |
| chr22 | 50353596 | 50357215 | PIM3         | ENSG00000198355 | 1244  | 0.31 | 0.3  | 0.73 | 0.0079 | NA |
| chr22 | 17564602 | 17564995 | IL17RA       | ENSG00000177663 | -1046 | 0.95 | 0.93 | 0.74 | 0.028  | NA |
| chr22 | 43010440 | 43011063 | POLDIP3      | ENSG00000100227 | 112   | 0.3  | 0.28 | 0.74 | 0.02   | NA |
| chr22 | 45064159 | 45065092 | PRR5         | ENSG00000186654 | 32    | 0.21 | 0.19 | 0.74 | 0.021  | NA |
| chr22 | 21336181 | 21336939 | LZTR1        | ENSG00000099949 | 258   | 0.19 | 0.2  | 0.75 | -0.011 | NA |
| chr22 | 30722572 | 30723218 | TBC1D10A     | ENSG00000099992 | -5    | 0.16 | 0.17 | 0.75 | -0.016 | NA |

|       |          |          |                  |                 |      |      |      |      |         |    |
|-------|----------|----------|------------------|-----------------|------|------|------|------|---------|----|
| chr22 | 42310057 | 42311669 | SHISA8           | ENSG00000234965 | -293 | 0.18 | 0.19 | 0.75 | -0.0086 | NA |
| chr22 | 42977728 | 42978214 | RP1-222E13.10    | ENSG00000182841 | 32   | 0.13 | 0.14 | 0.75 | -0.011  | NA |
| chr22 | 50689160 | 50690167 | HDAC10           | ENSG00000100429 | -344 | 0.19 | 0.17 | 0.75 | 0.013   | NA |
| chr22 | 26908214 | 26908542 | TFIP11           | ENSG00000100109 | -35  | 0.16 | 0.12 | 0.76 | 0.038   | NA |
| chr22 | 39898100 | 39898789 | SMCR7L           | ENSG00000100335 | 228  | 0.21 | 0.24 | 0.76 | -0.022  | NA |
| chr22 | 43570061 | 43570322 | TTLL12           | ENSG00000100304 | 1493 | 0.97 | 1    | 0.76 | -0.031  | NA |
| chr22 | 26936996 | 26937672 | TPST2            | ENSG00000128294 | -497 | 0.96 | 0.95 | 0.78 | 0.014   | NA |
| chr22 | 38966412 | 38966728 | DMC1             | ENSG00000100206 | -279 | 0.19 | 0.12 | 0.78 | 0.06    | NA |
| chr22 | 19929096 | 19929468 | COMT             | ENSG00000093010 | 152  | 0.19 | 0.22 | 0.79 | -0.027  | NA |
| chr22 | 38793732 | 38795370 | CSNK1E           | ENSG00000213923 | -24  | 0.22 | 0.21 | 0.79 | 0.01    | NA |
| chr22 | 46449632 | 46450115 | RP4-695O20__B.10 | ENSG00000197182 | 124  | 0.16 | 0.17 | 0.79 | -0.013  | NA |
| chr22 | 22292528 | 22292875 | LL22NC03-86G7.1  | ENSG00000224086 | 92   | 0.43 | 0.62 | 0.81 | -0.2    | NA |
| chr22 | 25678576 | 25679273 | RP3-462D8.2      | ENSG00000233577 | -283 | 0.15 | 0.15 | 0.81 | -0.0093 | NA |
| chr22 | 29875919 | 29877242 | NEFH             | ENSG00000100285 | 399  | 0.27 | 0.26 | 0.81 | 0.0092  | NA |
| chr22 | 31364564 | 31365575 | TUG1             | ENSG00000253352 | -574 | 0.25 | 0.26 | 0.83 | -0.0089 | NA |
| chr22 | 42016301 | 42017784 | PPPDE2           | ENSG00000100418 | 58   | 0.18 | 0.2  | 0.83 | -0.015  | NA |
| chr22 | 50638647 | 50640389 | RP3-402G11.5     | ENSG00000073169 | 110  | 0.2  | 0.21 | 0.83 | -0.0068 | NA |
| chr22 | 31476872 | 31477505 | SMTN             | ENSG00000183963 | -116 | 0.18 | 0.16 | 0.84 | 0.017   | NA |
| chr22 | 21056258 | 21058793 | TMEM191A         | ENSG00000226287 | 925  | 0.16 | 0.17 | 0.85 | -0.01   | NA |
| chr22 | 27053081 | 27053629 | MIAT             | ENSG00000225783 | 165  | 0.2  | 0.19 | 0.85 | 0.016   | NA |
| chr22 | 35795856 | 35796650 | MCM5             | ENSG00000100297 | 197  | 0.22 | 0.21 | 0.85 | 0.014   | NA |
| chr22 | 39638219 | 39640966 | PDGFB            | ENSG00000100311 | -571 | 0.22 | 0.21 | 0.85 | 0.0061  | NA |
| chr22 | 18957995 | 18958721 | DGCR5            | ENSG00000237517 | 331  | 0.25 | 0.27 | 0.86 | -0.02   | NA |
| chr22 | 21212710 | 21213694 | PI4KA            | ENSG00000241973 | -102 | 0.26 | 0.24 | 0.86 | 0.021   | NA |
| chr22 | 24114875 | 24115467 | MMP11            | ENSG00000099953 | 165  | 0.19 | 0.17 | 0.86 | 0.018   | NA |
| chr22 | 37578232 | 37578660 | C1QTNF6          | ENSG00000133466 | 399  | 0.96 | 0.97 | 0.86 | -0.016  | NA |
| chr22 | 39688128 | 39688349 | RP3-333H23.8     | ENSG00000224794 | -755 | 0.82 | 0.85 | 0.86 | -0.029  | NA |
| chr22 | 47022457 | 47022659 | GRAMD4           | ENSG00000075240 | -100 | 0.94 | 1    | 0.86 | -0.056  | NA |
| chr22 | 45680644 | 45681016 | UPK3A            | ENSG00000100373 | -33  | 0.18 | 0.15 | 0.87 | 0.027   | NA |
| chr22 | 47017355 | 47017654 | GRAMD4           | ENSG00000075240 | 1205 | 0.93 | 0.96 | 0.87 | -0.029  | NA |



|       |          |          |              |                 |      |      |      |      |         |    |
|-------|----------|----------|--------------|-----------------|------|------|------|------|---------|----|
| chr22 | 20003521 | 20004695 | ARVCF        | ENSG00000099889 | 160  | 0.19 | 0.2  | 0.88 | -0.0064 | NA |
| chr22 | 24236257 | 24237539 | MIF          | ENSG00000240972 | 261  | 0.17 | 0.17 | 0.88 | -0.0056 | NA |
| chr22 | 35695643 | 35696110 | TOM1         | ENSG00000100284 | 83   | 0.27 | 0.28 | 0.88 | -0.015  | NA |
| chr22 | 47058870 | 47059114 | GRAMD4       | ENSG00000075240 | -12  | 0.95 | 0.96 | 0.88 | -0.011  | NA |
| chr22 | 17565517 | 17566990 | IL17RA       | ENSG00000177663 | 409  | 0.22 | 0.22 | 0.89 | -0.0044 | NA |
| chr22 | 33453892 | 33454505 | SYN3         | ENSG00000185666 | 160  | 0.2  | 0.19 | 0.89 | 0.0094  | NA |
| chr22 | 37420225 | 37420900 | MPST         | ENSG00000128309 | 305  | 0.97 | 0.97 | 0.9  | 0.0067  | NA |
| chr22 | 38301954 | 38302871 | MICALL1      | ENSG00000100139 | 108  | 0.22 | 0.23 | 0.9  | -0.011  | NA |
| chr22 | 46366726 | 46368726 | WNT7B        | ENSG00000188064 | 869  | 0.21 | 0.22 | 0.9  | -0.0051 | NA |
| chr22 | 21770896 | 21772442 | HIC2         | ENSG00000169635 | -24  | 0.13 | 0.33 | 0.91 | -0.2    | NA |
| chr22 | 32149762 | 32150064 | DEPDC5       | ENSG00000100150 | -31  | 0.21 | 0.19 | 0.91 | 0.02    | NA |
| chr22 | 39915622 | 39917193 | ATF4         | ENSG00000128272 | 707  | 0.21 | 0.2  | 0.91 | 0.0063  | NA |
| chr22 | 42372483 | 42373299 | 3-Sep        | ENSG00000100167 | 77   | 0.23 | 0.22 | 0.91 | 0.009   | NA |
| chr22 | 20067406 | 20067900 | DGCR8        | ENSG00000128191 | -102 | 0.37 | 0.39 | 0.92 | -0.02   | NA |
| chr22 | 38245341 | 38245681 | EIF3L        | ENSG00000100129 | 93   | 0.17 | 0.19 | 0.93 | -0.017  | NA |
| chr22 | 41864420 | 41865443 | PHF5A        | ENSG00000100410 | -428 | 0.17 | 0.15 | 0.93 | 0.011   | NA |
| chr22 | 20008347 | 20009100 | C22orf25     | ENSG00000183597 | 131  | 0.17 | 0.18 | 0.95 | -0.01   | NA |
| chr22 | 50781190 | 50782009 | PPP6R2       | ENSG00000100239 | -134 | 0.19 | 0.18 | 0.95 | 0.0068  | NA |
| chr22 | 20861679 | 20862252 | MED15        | ENSG00000099917 | 137  | 0.2  | 0.21 | 0.96 | -0.0082 | NA |
| chr22 | 24059016 | 24059643 | AP000347.2   | ENSG00000228315 | 125  | 0.18 | 0.19 | 0.96 | -0.0068 | NA |
| chr22 | 30642437 | 30642671 | LIF          | ENSG00000128342 | 174  | 0.21 | 0.19 | 0.96 | 0.021   | NA |
| chr22 | 41460014 | 41460272 | RP11-12M9.3  | ENSG00000237214 | 87   | 0.96 | 0.96 | 0.96 | -0.0072 | NA |
| chr22 | 18985499 | 18985700 | DGCR5        | ENSG00000237517 | -188 | 0.31 | 0.29 | 0.97 | 0.023   | NA |
| chr22 | 19841883 | 19843010 | GNB1L        | ENSG00000185838 | -117 | 0.16 | 0.15 | 0.99 | 0.0035  | NA |
| chr22 | 39189721 | 39190119 | DNAL4        | ENSG00000100246 | 217  | 0.23 | 0.22 | 0.99 | 0.012   | NA |
| chr22 | 51066107 | 51067051 | ARSA         | ENSG00000100299 | 4    | 0.16 | 0.17 | 0.99 | -0.0028 | NA |
| chr22 | 16122622 | 16122923 | LA16c-60H5.7 | ENSG00000215270 | 52   | 1    | 1    | 1    | 0       | NA |
| chr22 | 16228205 | 16228546 | GRAMD4P2     | ENSG00000235992 | 1237 | 0.76 | 1    | 1    | -0.24   | NA |
| chr22 | 17083384 | 17083628 | AC005301.5   | ENSG00000100181 | 572  | 0.21 | 0.21 | 1    | 0.0035  | NA |
| chr22 | 18111132 | 18111672 | ATP6V1E1     | ENSG00000131100 | 97   | 0.2  | 0.2  | 1    | 0.00072 | NA |

|       |          |          |              |                 |      |      |      |   |         |    |
|-------|----------|----------|--------------|-----------------|------|------|------|---|---------|----|
| chr22 | 18483191 | 18484500 | MICAL3       | ENSG00000243156 | 101  | 0.24 | 0.24 | 1 | 0.0017  | NA |
| chr22 | 19119160 | 19119702 | TSSK2        | ENSG00000206203 | 1110 | 1    | 1    | 1 | 0       | NA |
| chr22 | 19742901 | 19744729 | TBX1         | ENSG00000184058 | -411 | 0.2  | 0.2  | 1 | #####   | NA |
| chr22 | 20073363 | 20073931 | MIR1306      | ENSG00000221366 | 66   | 0.98 | 1    | 1 | -0.024  | NA |
| chr22 | 20748094 | 20748811 | ZNF74        | ENSG00000185252 | 47   | 0.2  | 0.2  | 1 | 0.0026  | NA |
| chr22 | 21368197 | 21368771 | AC002472.8   | ENSG00000161149 | 92   | 0.25 | 0.18 | 1 | 0.068   | NA |
| chr22 | 21622176 | 21622503 | KB-1183D5.9  | ENSG00000226885 | -111 | 1    | 1    | 1 | 0       | NA |
| chr22 | 22221055 | 22222367 | MAPK1        | ENSG00000100030 | 19   | 0.2  | 0.2  | 1 | -0.0026 | NA |
| chr22 | 22862623 | 22863220 | ZNF280B      | ENSG00000198477 | 551  | 0.16 | 0.15 | 1 | 0.004   | NA |
| chr22 | 23802501 | 23802934 | AP000344.4   | ENSG00000227755 | 181  | 1    | 1    | 1 | 0       | NA |
| chr22 | 24110029 | 24110995 | CHCHD10      | ENSG00000250479 | -449 | 0.27 | 0.27 | 1 | -0.0016 | NA |
| chr22 | 25201953 | 25202553 | SGSM1        | ENSG00000167037 | 65   | 0.2  | 0.19 | 1 | 0.011   | NA |
| chr22 | 29426510 | 29426843 | CTA-747E2.11 | ENSG00000177993 | 788  | 0.25 | 0.25 | 1 | -0.0089 | NA |
| chr22 | 29706500 | 29706710 | GAS2L1       | ENSG00000185340 | 336  | 0.94 | 0.96 | 1 | -0.021  | NA |
| chr22 | 29707479 | 29707797 | GAS2L1       | ENSG00000185340 | 1369 | 0.71 | 0.71 | 1 | 0.0075  | NA |
| chr22 | 31686636 | 31687371 | PIK3IP1      | ENSG00000100100 | -291 | 0.21 | 0.21 | 1 | 0.0011  | NA |
| chr22 | 32366492 | 32367061 | CTA-342B11.2 | ENSG00000230866 | -34  | 0.23 | 0.23 | 1 | -0.0018 | NA |
| chr22 | 36424219 | 36425303 | RBFOX2       | ENSG00000100320 | -288 | 0.25 | 0.25 | 1 | -0.0047 | NA |
| chr22 | 37099471 | 37099711 | CACNG2       | ENSG00000166862 | 12   | 0.25 | 0.26 | 1 | -0.012  | NA |
| chr22 | 37914768 | 37915883 | CARD10       | ENSG00000100065 | -78  | 0.25 | 0.25 | 1 | -0.0018 | NA |
| chr22 | 38203588 | 38204218 | GCAT         | ENSG00000100116 | -9   | 0.48 | 0.47 | 1 | 0.011   | NA |
| chr22 | 38453187 | 38453503 | PICK1        | ENSG00000100151 | 138  | 0.27 | 0.33 | 1 | -0.063  | NA |
| chr22 | 39548102 | 39548432 | CBX7         | ENSG00000100307 | 182  | 0.22 | 0.18 | 1 | 0.046   | NA |
| chr22 | 41185197 | 41185416 | RP3-408N23.4 | ENSG00000230769 | -35  | 0.93 | 0.94 | 1 | -0.015  | NA |
| chr22 | 41252146 | 41253240 | ST13         | ENSG00000100380 | -124 | 0.33 | 0.31 | 1 | 0.02    | NA |
| chr22 | 41681616 | 41682543 | RANGAP1      | ENSG00000100401 | -170 | 0.2  | 0.2  | 1 | -0.0033 | NA |
| chr22 | 42095414 | 42096189 | MEI1         | ENSG00000167077 | 298  | 0.67 | 0.68 | 1 | -0.0055 | NA |
| chr22 | 42195953 | 42196961 | CCDC134      | ENSG00000100147 | -226 | 0.18 | 0.18 | 1 | -0.001  | NA |
| chr22 | 45598721 | 45599080 | KIAA0930     | ENSG00000100364 | -304 | 1    | 1    | 1 | 0       | NA |
| chr22 | 45636070 | 45636606 | KIAA0930     | ENSG00000100364 | 285  | 0.28 | 0.27 | 1 | 0.0074  | NA |

|       |           |           |               |                 |      |      |      |          |          |    |
|-------|-----------|-----------|---------------|-----------------|------|------|------|----------|----------|----|
| chr22 | 46645764  | 46646957  | C22orf40      | ENSG00000205643 | -174 | 0.19 | 0.19 | 1        | 7.00E-05 | NA |
| chr22 | 46685379  | 46685796  | TTC38         | ENSG00000075234 | 1180 | 0.97 | 1    | 1        | -0.032   | NA |
| chr22 | 50169612  | 50169864  | BRD1          | ENSG00000100425 | 25   | 1    | 1    | 1        | 0        | NA |
| chr22 | 50316783  | 50317011  | CRELD2        | ENSG00000184164 | 39   | 0.94 | 0.93 | 1        | 0.0069   | NA |
| chr22 | 50945859  | 50946121  | LMF2          | ENSG00000100258 | 123  | 0.33 | 0.31 | 1        | 0.024    | NA |
| chr22 | 16288314  | 16288570  | POTEH         | ENSG00000198062 | -505 | NA   | 1    | NA       | NA       | NA |
| chr22 | 16404342  | 16404671  | LA16c-60G3.7  | ENSG00000213727 | -192 | 1    | NA   | NA       | NA       | NA |
| chr22 | 20377811  | 20380341  | AC023490.1    | ENSG00000206176 | 262  | 1    | NA   | NA       | NA       | NA |
| chr22 | 20427046  | 20428590  | PI4KAP1       | ENSG00000215513 | 17   | NA   | 1    | NA       | NA       | NA |
| chr22 | 20459267  | 20461473  | RIMBP3        | ENSG00000196622 | 1039 | 0.09 | NA   | NA       | NA       | NA |
| chr22 | 20503820  | 20504267  | AC011718.4    | ENSG00000225894 | -559 | NA   | 0.67 | NA       | NA       | NA |
| chr22 | 21695101  | 21695548  | KB-1183D5.15  | ENSG00000232771 | -560 | NA   | 0.5  | NA       | NA       | NA |
| chr22 | 24308762  | 24309700  | DDTL          | ENSG00000099974 | 142  | NA   | 1    | NA       | NA       | NA |
| chr22 | 24372912  | 24373725  | AP000351.10   | ENSG00000235231 | 201  | NA   | 0.41 | NA       | NA       | NA |
| chr22 | 24647367  | 24647600  | POM121L9P     | ENSG00000128262 | -313 | 1    | NA   | NA       | NA       | NA |
| chr22 | 25423973  | 25424230  | KIAA1671      | ENSG00000197077 | 160  | NA   | 1    | NA       | NA       | NA |
| chr22 | 38470263  | 38470484  | RP5-1039K5.13 | ENSG00000233739 | -426 | 1    | NA   | NA       | NA       | NA |
| chr22 | 38516735  | 38517030  | PLA2G6        | ENSG00000184381 | 165  | 1    | NA   | NA       | NA       | NA |
| chr22 | 41601069  | 41601476  | L3MBTL2       | ENSG00000100395 | 63   | 0.15 | NA   | NA       | NA       | NA |
| chr22 | 50529561  | 50529798  | MOV10L1       | ENSG00000073146 | 994  | 1    | NA   | NA       | NA       | NA |
| chr3  | 50230430  | 50232344  | GNAT1         | ENSG00000114349 | 382  | 0.49 | 0.34 | 2.40E-09 | 0.15     | NA |
| chr3  | 138153269 | 138154621 | ESYT3         | ENSG00000158220 | 517  | 0.39 | 0.19 | 2.70E-09 | 0.2      | NA |
| chr3  | 182880277 | 182880722 | LAMP3         | ENSG00000078081 | 171  | 0.36 | 0.12 | 3.70E-09 | 0.25     | NA |
| chr3  | 142681137 | 142683268 | PAQR9         | ENSG00000188582 | -803 | 0.44 | 0.2  | 5.60E-09 | 0.24     | NA |
| chr3  | 170136242 | 170137886 | CLDN11        | ENSG00000013297 | 411  | 0.73 | 0.42 | 1.10E-08 | 0.31     | NA |
| chr3  | 138048193 | 138048778 | TXNDC6        | ENSG00000181322 | -280 | 0.29 | 0.11 | 1.40E-08 | 0.18     | NA |
| chr3  | 138762689 | 138764113 | PRR23C        | ENSG00000233701 | 333  | 0.84 | 0.68 | 1.40E-08 | 0.16     | NA |
| chr3  | 197807029 | 197808734 | AC073135.1    | ENSG00000226435 | -498 | 0.35 | 0.19 | 1.50E-08 | 0.15     | NA |
| chr3  | 46506161  | 46506416  | LTF           | ENSG00000012223 | 70   | 0.95 | 0.53 | 1.70E-08 | 0.42     | NA |
| chr3  | 75444712  | 75445611  | RP11-803B1.3  | ENSG00000242953 | -474 | 0.53 | 0.28 | 2.40E-08 | 0.25     | NA |

|      |           |           |               |                 |      |      |      |          |      |    |
|------|-----------|-----------|---------------|-----------------|------|------|------|----------|------|----|
| chr3 | 125677127 | 125678408 | RP11-666A20.3 | ENSG00000241439 | 368  | 0.77 | 0.6  | 4.20E-08 | 0.18 | NA |
| chr3 | 47050486  | 47051609  | NBEAL2        | ENSG00000160796 | 1794 | 0.43 | 0.24 | 4.80E-08 | 0.19 | NA |
| chr3 | 192634309 | 192635967 | MB21D2        | ENSG00000180611 | 812  | 0.32 | 0.14 | 5.40E-08 | 0.18 | NA |
| chr3 | 184079215 | 184081286 | CLCN2         | ENSG00000114859 | -976 | 0.38 | 0.17 | 1.00E-07 | 0.21 | NA |
| chr3 | 150802996 | 150805168 | MED12L        | ENSG00000144893 | 598  | 0.25 | 0.14 | 1.10E-07 | 0.11 | NA |
| chr3 | 127794369 | 127796136 | RP11-525K18.2 | ENSG00000239608 | 599  | 0.56 | 0.29 | 1.20E-07 | 0.27 | NA |
| chr3 | 156391811 | 156393607 | TIPARP        | ENSG00000163659 | 578  | 0.33 | 0.16 | 1.30E-07 | 0.17 | NA |
| chr3 | 184279194 | 184280721 | EPHB3         | ENSG00000182580 | 385  | 0.3  | 0.18 | 1.40E-07 | 0.13 | NA |
| chr3 | 195716516 | 195717575 | SDHAP1        | ENSG00000185485 | 84   | 0.3  | 0.09 | 1.60E-07 | 0.2  | NA |
| chr3 | 10857687  | 10858447  | SLC6A11       | ENSG00000132164 | 182  | 0.39 | 0.2  | 2.00E-07 | 0.19 | NA |
| chr3 | 13460970  | 13462146  | NUP210        | ENSG00000132182 | 251  | 0.27 | 0.12 | 2.60E-07 | 0.15 | NA |
| chr3 | 148415442 | 148415932 | AGTR1         | ENSG00000144891 | 116  | 0.61 | 0.2  | 2.90E-07 | 0.41 | NA |
| chr3 | 43731998  | 43733108  | ANO10         | ENSG00000160746 | -248 | 0.32 | 0.19 | 3.70E-07 | 0.13 | NA |
| chr3 | 196728958 | 196730878 | AC068302.3    | ENSG00000228109 | 141  | 0.31 | 0.17 | 4.30E-07 | 0.14 | NA |
| chr3 | 120003883 | 120004426 | GPR156        | ENSG00000175697 | -233 | 0.5  | 0.15 | 4.60E-07 | 0.35 | NA |
| chr3 | 160167184 | 160168200 | TRIM59        | ENSG00000213186 | -291 | 0.58 | 0.3  | 9.40E-07 | 0.28 | NA |
| chr3 | 136537559 | 136539204 | TMEM22        | ENSG00000168917 | 520  | 0.34 | 0.17 | 1.00E-06 | 0.17 | NA |
| chr3 | 120025415 | 120026241 | RP11-174O3.1  | ENSG00000240882 | 255  | 0.88 | 0.68 | 1.10E-06 | 0.2  | NA |
| chr3 | 161089626 | 161090649 | C3orf57       | ENSG00000196542 | 531  | 0.23 | 0.11 | 1.30E-06 | 0.12 | NA |
| chr3 | 138663718 | 138666346 | FOXL2         | ENSG00000183770 | 769  | 0.32 | 0.2  | 2.00E-06 | 0.12 | NA |
| chr3 | 196255495 | 196256013 | AC092933.4    | ENSG00000213358 | -92  | 0.39 | 0.15 | 2.10E-06 | 0.24 | NA |
| chr3 | 58477486  | 58478274  | KCTD6         | ENSG00000168301 | 39   | 0.41 | 0.12 | 2.20E-06 | 0.29 | NA |
| chr3 | 128719865 | 128721245 | RP11-723O4.8  | ENSG00000250856 | -167 | 0.34 | 0.19 | 2.30E-06 | 0.15 | NA |
| chr3 | 172165372 | 172166738 | GHSR          | ENSG00000121853 | 190  | 0.47 | 0.23 | 2.40E-06 | 0.24 | NA |
| chr3 | 185000557 | 185000896 | MAP3K13       | ENSG00000073803 | -3   | 1    | 0.13 | 2.40E-06 | 0.87 | NA |
| chr3 | 195600845 | 195602361 | TNK2          | ENSG00000061938 | 1918 | 0.91 | 0.48 | 3.00E-06 | 0.44 | NA |
| chr3 | 48541298  | 48541911  | SHISA5        | ENSG00000164054 | -121 | 0.38 | 0.14 | 3.10E-06 | 0.24 | NA |
| chr3 | 197183404 | 197183724 | AC128709.4    | ENSG00000229912 | -39  | 0.39 | 0.13 | 5.20E-06 | 0.26 | NA |
| chr3 | 42977830  | 42978090  | KRBOX1        | ENSG00000240747 | 126  | 1    | 0.25 | 5.30E-06 | 0.75 | NA |
| chr3 | 137482964 | 137484454 | SOX14         | ENSG00000168875 | 130  | 0.35 | 0.21 | 6.00E-06 | 0.13 | NA |

|      |           |           |               |                 |       |      |      |          |        |    |
|------|-----------|-----------|---------------|-----------------|-------|------|------|----------|--------|----|
| chr3 | 2140029   | 2141784   | CNTN4         | ENSG00000144619 | 409   | 0.25 | 0.39 | 6.40E-06 | -0.14  | NA |
| chr3 | 181430141 | 181431076 | SOX2          | ENSG00000181449 | 886   | 0.3  | 0.14 | 6.40E-06 | 0.16   | NA |
| chr3 | 134369464 | 134370242 | KY            | ENSG00000174611 | 7     | 0.52 | 0.31 | 6.50E-06 | 0.21   | NA |
| chr3 | 197476262 | 197477556 | FYTTD1        | ENSG00000122068 | 505   | 0.34 | 0.19 | 7.80E-06 | 0.15   | NA |
| chr3 | 45187026  | 45187946  | CDCP1         | ENSG00000163814 | 428   | 0.25 | 0.14 | 9.60E-06 | 0.11   | NA |
| chr3 | 187455330 | 187455843 | BCL6          | ENSG00000113916 | 146   | 0.39 | 0.1  | 9.90E-06 | 0.29   | NA |
| chr3 | 28616663  | 28617970  | AC109586.1    | ENSG00000228214 | -586  | 0.28 | 0.14 | 1.20E-05 | 0.14   | NA |
| chr3 | 140660334 | 140661602 | SLC25A36      | ENSG00000114120 | 296   | 0.32 | 0.19 | 1.20E-05 | 0.13   | NA |
| chr3 | 64430585  | 64431192  | RP11-14D22.1  | ENSG00000244564 | -19   | 0.33 | 0.17 | 1.30E-05 | 0.15   | NA |
| chr3 | 150479734 | 150481888 | SIAH2         | ENSG00000181788 | 353   | 0.28 | 0.18 | 1.30E-05 | 0.1    | NA |
| chr3 | 159942916 | 159944431 | CTD-2049J23.2 | ENSG00000244040 | -587  | 0.3  | 0.18 | 1.50E-05 | 0.12   | NA |
| chr3 | 75718116  | 75719159  | RP11-413E6.7  | ENSG00000236138 | 555   | 0.62 | 0.7  | 1.60E-05 | -0.085 | NA |
| chr3 | 50357453  | 50357683  | HYAL2         | ENSG00000068001 | 811   | 0.72 | 0.46 | 1.90E-05 | 0.25   | NA |
| chr3 | 14165717  | 14166999  | CHCHD4        | ENSG00000163528 | -109  | 0.39 | 0.19 | 2.00E-05 | 0.2    | NA |
| chr3 | 44622586  | 44622866  | RP11-944L7.2  | ENSG00000214820 | -208  | 0.62 | 0.38 | 2.00E-05 | 0.24   | NA |
| chr3 | 51428412  | 51429625  | RBM15B        | ENSG00000179837 | 287   | 0.21 | 0.11 | 2.10E-05 | 0.1    | NA |
| chr3 | 180319823 | 180320393 | TTC14         | ENSG00000163728 | 190   | 0.36 | 0.17 | 3.50E-05 | 0.19   | NA |
| chr3 | 183892455 | 183893184 | AP2M1         | ENSG00000161203 | 342   | 0.63 | 0.25 | 4.30E-05 | 0.38   | NA |
| chr3 | 96495617  | 96495982  | RP11-346M10.2 | ENSG00000176243 | 10    | 0.95 | 0.4  | 4.40E-05 | 0.55   | NA |
| chr3 | 193852241 | 193852717 | HES1          | ENSG00000114315 | -1455 | 0.43 | 0.17 | 4.50E-05 | 0.25   | NA |
| chr3 | 23847871  | 23848633  | AC020626.1    | ENSG00000223791 | 144   | 0.28 | 0.11 | 5.90E-05 | 0.16   | NA |
| chr3 | 186856927 | 186857659 | RPL39L        | ENSG00000163923 | -21   | 0.49 | 0.24 | 7.80E-05 | 0.25   | NA |
| chr3 | 147108511 | 147111703 | ZIC4          | ENSG00000174963 | 71    | 0.32 | 0.19 | 8.40E-05 | 0.12   | NA |
| chr3 | 197024427 | 197025506 | DLG1          | ENSG00000075711 | -499  | 0.41 | 0.23 | 1.00E-04 | 0.18   | NA |
| chr3 | 23851987  | 23852508  | UBE2E1        | ENSG00000170142 | -39   | 0.45 | 0.2  | 0.00012  | 0.25   | NA |
| chr3 | 156877175 | 156878364 | CCNL1         | ENSG00000163660 | -539  | 0.28 | 0.16 | 0.00013  | 0.13   | NA |
| chr3 | 184870185 | 184871525 | C3orf70       | ENSG00000187068 | -53   | 0.35 | 0.18 | 0.00013  | 0.18   | NA |
| chr3 | 186078710 | 186080111 | DGKG          | ENSG00000058866 | 336   | 0.33 | 0.12 | 0.00014  | 0.21   | NA |
| chr3 | 187461974 | 187462197 | RP11-211G3.2  | ENSG00000223401 | 611   | 0.6  | 0.14 | 0.00014  | 0.46   | NA |
| chr3 | 33138083  | 33138769  | GLB1          | ENSG00000170266 | -142  | 0.26 | 0.12 | 0.00015  | 0.13   | NA |

|      |           |           |               |                 |      |      |      |          |       |    |
|------|-----------|-----------|---------------|-----------------|------|------|------|----------|-------|----|
| chr3 | 58291813  | 58292385  | RPP14         | ENSG00000163684 | 125  | 0.34 | 0.17 | 0.00015  | 0.17  | NA |
| chr3 | 171527617 | 171528458 | AC078953.1    | ENSG00000183657 | -323 | 0.44 | 0.18 | 0.00015  | 0.26  | NA |
| chr3 | 183959061 | 183959747 | MIR1224       | ENSG00000221120 | 211  | 0.76 | 0.48 | 0.00016  | 0.27  | NA |
| chr3 | 141867962 | 141868613 | TFDP2         | ENSG00000114126 | 15   | 0.17 | 0.73 | 0.00018  | -0.56 | NA |
| chr3 | 182697749 | 182698731 | DCUN1D1       | ENSG00000043093 | -301 | 0.35 | 0.19 | 0.00018  | 0.15  | NA |
| chr3 | 127308568 | 127310132 | TPRA1         | ENSG00000163870 | 192  | 0.28 | 0.16 | 2.00E-04 | 0.12  | NA |
| chr3 | 47204789  | 47206336  | SETD2         | ENSG00000181555 | -496 | 0.28 | 0.17 | 0.00022  | 0.11  | NA |
| chr3 | 58318398  | 58319192  | PXK           | ENSG00000168297 | 188  | 0.26 | 0.14 | 0.00022  | 0.11  | NA |
| chr3 | 138724325 | 138725446 | MRPS22        | ENSG00000175110 | 237  | 0.86 | 0.75 | 0.00026  | 0.11  | NA |
| chr3 | 46618307  | 46618669  | AC104304.1    | ENSG00000241186 | -239 | 0.27 | 0.48 | 0.00028  | -0.21 | NA |
| chr3 | 36985540  | 36987041  | TRANK1        | ENSG00000168016 | 258  | 0.36 | 0.22 | 0.00032  | 0.14  | NA |
| chr3 | 126135050 | 126135431 | CCDC37        | ENSG00000163885 | 62   | 0.63 | 0.33 | 0.00036  | 0.31  | NA |
| chr3 | 100211233 | 100211575 | TMEM45A       | ENSG00000181458 | -59  | 0.19 | 0.71 | 4.00E-04 | -0.52 | NA |
| chr3 | 190231330 | 190232026 | IL1RAP        | ENSG00000196083 | -162 | 0.23 | 0.1  | 4.00E-04 | 0.12  | NA |
| chr3 | 193788481 | 193789266 | RP11-407B7.1  | ENSG00000230102 | -132 | 0.38 | 0.2  | 0.00043  | 0.18  | NA |
| chr3 | 196755677 | 196757374 | MF12          | ENSG00000163975 | -360 | 0.34 | 0.19 | 0.00043  | 0.15  | NA |
| chr3 | 159480946 | 159483023 | IQCJ-SCHIP1   | ENSG00000250588 | 482  | 0.3  | 0.19 | 0.00045  | 0.11  | NA |
| chr3 | 9745499   | 9746782   | CPNE9         | ENSG00000144550 | 630  | 0.27 | 0.17 | 0.00046  | 0.1   | NA |
| chr3 | 122785734 | 122786600 | PDIA5         | ENSG00000065485 | 258  | 0.33 | 0.17 | 0.00046  | 0.16  | NA |
| chr3 | 179280362 | 179281463 | ACTL6A        | ENSG00000136518 | 244  | 0.4  | 0.17 | 0.00046  | 0.23  | NA |
| chr3 | 187456250 | 187456580 | BCL6          | ENSG00000113916 | -683 | 0.71 | 0.14 | 0.00056  | 0.57  | NA |
| chr3 | 42306149  | 42307520  | CCK           | ENSG00000187094 | -577 | 0.31 | 0.19 | 0.00057  | 0.12  | NA |
| chr3 | 88107550  | 88108509  | CGGBP1        | ENSG00000163320 | 66   | 0.28 | 0.14 | 0.00059  | 0.14  | NA |
| chr3 | 136580875 | 136581721 | RP11-85F14.5  | ENSG00000239213 | -419 | 0.36 | 0.19 | 0.00065  | 0.17  | NA |
| chr3 | 160472310 | 160474487 | PPM1L         | ENSG00000163590 | 8    | 0.25 | 0.16 | 0.00066  | 0.086 | NA |
| chr3 | 152878268 | 152881086 | RP11-529G21.2 | ENSG00000244268 | -113 | 0.25 | 0.15 | 0.00069  | 0.1   | NA |
| chr3 | 15247446  | 15248320  | COL6A4P1      | ENSG00000230524 | -417 | 0.44 | 0.24 | 0.00075  | 0.19  | NA |
| chr3 | 37034228  | 37035356  | EPM2AIP1      | ENSG00000178567 | 3    | 0.32 | 0.07 | 0.00075  | 0.25  | NA |
| chr3 | 183145427 | 183146790 | MCF2L2        | ENSG00000053524 | -343 | 0.3  | 0.17 | 0.00077  | 0.13  | NA |
| chr3 | 52552722  | 52553384  | STAB1         | ENSG00000010327 | 236  | 0.76 | 0.45 | 0.00081  | 0.31  | NA |

|      |           |           |             |                 |       |      |      |         |       |    |
|------|-----------|-----------|-------------|-----------------|-------|------|------|---------|-------|----|
| chr3 | 185541048 | 185544146 | IGF2BP2     | ENSG00000073792 | -1538 | 0.27 | 0.19 | 0.00083 | 0.082 | NA |
| chr3 | 194117601 | 194118988 | GP5         | ENSG00000178732 | 789   | 0.31 | 0.48 | 0.00084 | -0.17 | NA |
| chr3 | 87101767  | 87102008  | PPATP1      | ENSG00000241293 | 1     | 0.98 | 0.86 | 0.00086 | 0.12  | NA |
| chr3 | 143689733 | 143692279 | C3orf58     | ENSG00000181744 | 366   | 0.31 | 0.2  | 0.00088 | 0.11  | NA |
| chr3 | 50540220  | 50541123  | CACNA2D2    | ENSG00000007402 | 183   | 0.35 | 0.21 | 0.00091 | 0.14  | NA |
| chr3 | 138066795 | 138067854 | MRAS        | ENSG00000158186 | 10    | 0.39 | 0.22 | 0.00093 | 0.18  | NA |
| chr3 | 38495088  | 38497151  | ACVR2B      | ENSG00000114739 | 777   | 0.27 | 0.18 | 0.001   | 0.093 | NA |
| chr3 | 196695319 | 196697065 | PIGZ        | ENSG00000119227 | -488  | 0.25 | 0.17 | 0.001   | 0.08  | NA |
| chr3 | 6902823   | 6903516   | GRM7        | ENSG00000196277 | 242   | 0.34 | 0.18 | 0.0011  | 0.16  | NA |
| chr3 | 71834068  | 71834653  | PROK2       | ENSG00000163421 | -148  | 0.24 | 0.1  | 0.0011  | 0.14  | NA |
| chr3 | 105085990 | 105086223 | ALCAM       | ENSG00000170017 | -81   | 0.47 | 0.2  | 0.0011  | 0.28  | NA |
| chr3 | 142607195 | 142608229 | PCOLCE2     | ENSG00000163710 | -125  | 0.26 | 0.16 | 0.0011  | 0.093 | NA |
| chr3 | 194990987 | 194992478 | C3orf21     | ENSG00000173950 | -142  | 0.34 | 0.19 | 0.0011  | 0.14  | NA |
| chr3 | 196359201 | 196359684 | AC023797.1  | ENSG00000232065 | 16    | 0.23 | 0.42 | 0.0011  | -0.2  | NA |
| chr3 | 49058325  | 49059986  | NDUFAF3     | ENSG00000178057 | 711   | 0.27 | 0.18 | 0.0012  | 0.097 | NA |
| chr3 | 3840513   | 3842772   | LRRN1       | ENSG00000175928 | 521   | 0.27 | 0.18 | 0.0014  | 0.09  | NA |
| chr3 | 13114627  | 13115245  | IQSEC1      | ENSG00000144711 | -319  | 0.26 | 0.44 | 0.0014  | -0.18 | NA |
| chr3 | 87039610  | 87040516  | VGLL3       | ENSG00000206538 | -211  | 0.25 | 0.14 | 0.0014  | 0.11  | NA |
| chr3 | 42623214  | 42623872  | SS18L2      | ENSG00000008324 | 211   | 0.34 | 0.17 | 0.0015  | 0.17  | NA |
| chr3 | 124605059 | 124606729 | ITGB5       | ENSG00000082781 | 250   | 0.25 | 0.15 | 0.0017  | 0.1   | NA |
| chr3 | 46759064  | 46759550  | PRSS50      | ENSG00000206549 | 83    | 0.63 | 0.76 | 0.0018  | -0.14 | NA |
| chr3 | 122134685 | 122135084 | WDR5B       | ENSG00000196981 | -2    | 0.38 | 1    | 0.0018  | -0.62 | NA |
| chr3 | 11760638  | 11762078  | AC090939.2  | ENSG00000224386 | 443   | 0.35 | 0.23 | 0.0019  | 0.12  | NA |
| chr3 | 53078956  | 53081101  | SFMBT1      | ENSG00000163935 | -747  | 0.29 | 0.2  | 0.0019  | 0.089 | NA |
| chr3 | 128968342 | 128968544 | COPG        | ENSG00000181789 | -6    | 0.31 | 0.16 | 0.0019  | 0.15  | NA |
| chr3 | 118753092 | 118753961 | IGSF11      | ENSG00000144847 | 49    | 0.33 | 0.17 | 0.002   | 0.16  | NA |
| chr3 | 192232072 | 192233137 | RP11-91M9.1 | ENSG00000230126 | -207  | 0.33 | 0.19 | 0.002   | 0.14  | NA |
| chr3 | 13590414  | 13591008  | FBLN2       | ENSG00000163520 | 80    | 0.43 | 0.3  | 0.0023  | 0.13  | NA |
| chr3 | 71773826  | 71774873  | EIF4E3      | ENSG00000163412 | 177   | 0.3  | 0.13 | 0.0024  | 0.17  | NA |
| chr3 | 141594486 | 141596288 | ATP1B3      | ENSG00000069849 | 421   | 0.32 | 0.21 | 0.0024  | 0.11  | NA |

|      |           |           |               |                 |       |      |      |        |       |    |
|------|-----------|-----------|---------------|-----------------|-------|------|------|--------|-------|----|
| chr3 | 56716492  | 56717658  | C3orf63       | ENSG00000163946 | -30   | 0.25 | 0.16 | 0.0026 | 0.09  | NA |
| chr3 | 194207385 | 194208785 | ATP13A3       | ENSG00000133657 | -697  | 0.31 | 0.19 | 0.0026 | 0.12  | NA |
| chr3 | 38388122  | 38388769  | XYLB          | ENSG00000093217 | 194   | 0.47 | 0.26 | 0.0027 | 0.21  | NA |
| chr3 | 4534412   | 4535367   | AC024168.2    | ENSG00000231249 | -42   | 0.36 | 0.18 | 0.0029 | 0.19  | NA |
| chr3 | 69062159  | 69063190  | C3orf64       | ENSG00000163378 | 76    | 0.27 | 0.18 | 0.0029 | 0.09  | NA |
| chr3 | 45077069  | 45077690  | RNU5B-3P      | ENSG00000252410 | -1299 | 0.4  | 0.21 | 0.0031 | 0.18  | NA |
| chr3 | 113775147 | 113775582 | KIAA1407      | ENSG00000163617 | -30   | 0.49 | 0.2  | 0.0031 | 0.29  | NA |
| chr3 | 50374264  | 50375629  | RASSF1        | ENSG00000068028 | -51   | 0.23 | 0.17 | 0.0033 | 0.059 | NA |
| chr3 | 137489594 | 137491004 | RP11-2A4.3    | ENSG00000239513 | -492  | 0.26 | 0.18 | 0.0033 | 0.085 | NA |
| chr3 | 100119504 | 100120857 | LNP1          | ENSG00000206535 | 143   | 0.34 | 0.19 | 0.0034 | 0.15  | NA |
| chr3 | 196044436 | 196045284 | TCTEX1D2      | ENSG00000213123 | 225   | 0.38 | 0.18 | 0.0034 | 0.2   | NA |
| chr3 | 10052541  | 10053023  | AC022007.5    | ENSG00000206567 | -3    | 0.17 | 0.08 | 0.0035 | 0.095 | NA |
| chr3 | 49130677  | 49131845  | QRICH1        | ENSG00000198218 | -217  | 0.29 | 0.19 | 0.0036 | 0.096 | NA |
| chr3 | 57112567  | 57113908  | ARHGEF3       | ENSG00000163947 | -394  | 0.35 | 0.22 | 0.0037 | 0.13  | NA |
| chr3 | 119187747 | 119188308 | POGLUT1       | ENSG00000163389 | 242   | 0.33 | 0.14 | 0.0037 | 0.19  | NA |
| chr3 | 169898946 | 169899626 | PHC3          | ENSG00000173889 | 225   | 0.25 | 0.13 | 0.0038 | 0.12  | NA |
| chr3 | 52443677  | 52445104  | BAP1          | ENSG00000163930 | -591  | 0.33 | 0.23 | 0.004  | 0.094 | NA |
| chr3 | 71113896  | 71114102  | FOXP1         | ENSG00000114861 | 78    | 0.36 | 0.11 | 0.0041 | 0.25  | NA |
| chr3 | 119041382 | 119042255 | RP11-305I9.3  | ENSG00000241155 | -211  | 0.36 | 0.17 | 0.0041 | 0.19  | NA |
| chr3 | 73045834  | 73046517  | PPP4R2        | ENSG00000163605 | 239   | 0.42 | 0.22 | 0.0043 | 0.2   | NA |
| chr3 | 127316984 | 127317531 | TPRA1         | ENSG00000163870 | -210  | 0.25 | 0.14 | 0.0045 | 0.11  | NA |
| chr3 | 127872176 | 127872842 | EEFSEC        | ENSG00000132394 | 212   | 0.43 | 0.21 | 0.0048 | 0.22  | NA |
| chr3 | 13521506  | 13522262  | AC027124.4    | ENSG00000244502 | -331  | 0.15 | 0.27 | 0.0049 | -0.11 | NA |
| chr3 | 9004864   | 9005270   | RAD18         | ENSG00000070950 | 48    | 0.41 | 0.19 | 0.0051 | 0.21  | NA |
| chr3 | 37284558  | 37285281  | GOLGA4        | ENSG00000144674 | 251   | 0.26 | 0.18 | 0.0051 | 0.082 | NA |
| chr3 | 186490602 | 186490813 | RP11-573D15.6 | ENSG00000230951 | 329   | 0.49 | 0.23 | 0.0053 | 0.26  | NA |
| chr3 | 16925381  | 16926849  | PLCL2         | ENSG00000154822 | -337  | 0.36 | 0.27 | 0.0055 | 0.088 | NA |
| chr3 | 179040466 | 179041632 | ZNF639        | ENSG00000121864 | 270   | 0.29 | 0.17 | 0.0055 | 0.12  | NA |
| chr3 | 157260666 | 157261224 | C3orf55       | ENSG00000174899 | -90   | 0.35 | 0.17 | 0.0056 | 0.18  | NA |
| chr3 | 48754577  | 48754904  | IP6K2         | ENSG00000068745 | -141  | 0.25 | 0.12 | 0.0057 | 0.13  | NA |



|      |           |           |               |                 |      |      |      |        |       |    |
|------|-----------|-----------|---------------|-----------------|------|------|------|--------|-------|----|
| chr3 | 38690409  | 38691513  | SCN5A         | ENSG00000183873 | 158  | 0.34 | 0.22 | 0.0059 | 0.12  | NA |
| chr3 | 3221083   | 3221617   | CRBN          | ENSG00000113851 | 8    | 0.25 | 0.14 | 0.006  | 0.11  | NA |
| chr3 | 44666477  | 44666820  | ZNF197        | ENSG00000186448 | 137  | 0.32 | 0.16 | 0.0062 | 0.16  | NA |
| chr3 | 43663661  | 43663906  | ANO10         | ENSG00000160746 | -223 | 0.46 | 0.25 | 0.0063 | 0.21  | NA |
| chr3 | 72495853  | 72496852  | RYBP          | ENSG00000163602 | -283 | 0.29 | 0.2  | 0.0065 | 0.095 | NA |
| chr3 | 154042004 | 154042376 | DHX36         | ENSG00000174953 | -150 | 0.38 | 0.26 | 0.0065 | 0.12  | NA |
| chr3 | 46607346  | 46607806  | LRRC2         | ENSG00000163827 | 148  | 0.41 | 0.22 | 0.0066 | 0.19  | NA |
| chr3 | 167967246 | 167968130 | EGFEM1P       | ENSG00000206120 | 378  | 0.31 | 0.2  | 0.0066 | 0.11  | NA |
| chr3 | 36421702  | 36422210  | STAC          | ENSG00000144681 | 120  | 0.38 | 0.15 | 0.0069 | 0.22  | NA |
| chr3 | 111393190 | 111393544 | PLCXD2        | ENSG00000240891 | -156 | 0.38 | 0.19 | 0.0071 | 0.19  | NA |
| chr3 | 183872925 | 183873712 | DVL3          | ENSG00000161202 | 142  | 0.35 | 0.2  | 0.0071 | 0.16  | NA |
| chr3 | 58572478  | 58572903  | FAM107A       | ENSG00000168309 | 150  | 0.55 | 0.41 | 0.0072 | 0.14  | NA |
| chr3 | 172468372 | 172468845 | ECT2          | ENSG00000114346 | 136  | 0.48 | 0.24 | 0.0077 | 0.24  | NA |
| chr3 | 49394855  | 49395942  | GPX1          | ENSG00000233276 | 318  | 0.37 | 0.26 | 0.0079 | 0.11  | NA |
| chr3 | 9595185   | 9595533   | LHFPL4        | ENSG00000156959 | 120  | 0.22 | 0.11 | 0.0081 | 0.11  | NA |
| chr3 | 132756985 | 132757895 | TMEM108       | ENSG00000144868 | 205  | 0.37 | 0.2  | 0.0084 | 0.16  | NA |
| chr3 | 9690966   | 9691418   | MTMR14        | ENSG00000163719 | 75   | 0.27 | 0.18 | 0.009  | 0.097 | NA |
| chr3 | 57198243  | 57199378  | IL17RD        | ENSG00000144730 | 396  | 0.3  | 0.2  | 0.0092 | 0.098 | NA |
| chr3 | 154146347 | 154146965 | GPR149        | ENSG00000174948 | 848  | 0.35 | 0.11 | 0.0092 | 0.24  | NA |
| chr3 | 122296612 | 122296828 | PARP15        | ENSG00000173200 | 245  | 0.81 | 0.52 | 0.01   | 0.29  | NA |
| chr3 | 122513726 | 122514477 | DIRC2         | ENSG00000138463 | 170  | 0.26 | 0.12 | 0.01   | 0.13  | NA |
| chr3 | 129829971 | 129831426 | RP11-93K22.12 | ENSG00000253540 | -423 | 0.15 | 0.26 | 0.01   | -0.12 | NA |
| chr3 | 190039817 | 190040465 | CLDN1         | ENSG00000163347 | 91   | 0.32 | 0.19 | 0.01   | 0.13  | NA |
| chr3 | 48470230  | 48471389  | PLXNB1        | ENSG00000164050 | 63   | 0.37 | 0.25 | 0.012  | 0.12  | NA |
| chr3 | 93698763  | 93699433  | ARL13B        | ENSG00000169379 | 115  | 0.34 | 0.17 | 0.012  | 0.17  | NA |
| chr3 | 173115404 | 173115775 | NLGN1         | ENSG00000169760 | 19   | 0.27 | 0.16 | 0.012  | 0.11  | NA |
| chr3 | 183852778 | 183853386 | EIF2B5        | ENSG00000145191 | 256  | 0.69 | 0.23 | 0.012  | 0.46  | NA |
| chr3 | 12328994  | 12329227  | PPARG         | ENSG00000132170 | 223  | 0.31 | 0.11 | 0.013  | 0.19  | NA |
| chr3 | 14615366  | 14615957  | AC090952.4    | ENSG00000234123 | 638  | 0.96 | 0.83 | 0.013  | 0.13  | NA |
| chr3 | 193854575 | 193856015 | HES1          | ENSG00000114315 | 1358 | 0.3  | 0.18 | 0.013  | 0.12  | NA |

|      |           |           |               |                 |       |      |      |       |        |    |
|------|-----------|-----------|---------------|-----------------|-------|------|------|-------|--------|----|
| chr3 | 50648939  | 50649829  | MAPKAPK3      | ENSG00000114738 | 433   | 0.28 | 0.18 | 0.014 | 0.094  | NA |
| chr3 | 54155239  | 54157025  | CACNA2D3      | ENSG00000157445 | -442  | 0.3  | 0.2  | 0.014 | 0.096  | NA |
| chr3 | 124774246 | 124775113 | HEG1          | ENSG00000173706 | 123   | 0.25 | 0.15 | 0.014 | 0.099  | NA |
| chr3 | 136470433 | 136471923 | STAG1         | ENSG00000118007 | 30    | 0.26 | 0.19 | 0.014 | 0.07   | NA |
| chr3 | 168867211 | 168867413 | MECOM         | ENSG00000085276 | -1790 | 0.5  | 0.14 | 0.014 | 0.36   | NA |
| chr3 | 71630573  | 71633217  | FOXP1         | ENSG00000114861 | -791  | 0.3  | 0.23 | 0.015 | 0.064  | NA |
| chr3 | 194406440 | 194409045 | FAM43A        | ENSG00000185112 | 1120  | 0.33 | 0.26 | 0.015 | 0.068  | NA |
| chr3 | 42054781  | 42055929  | TRAK1         | ENSG00000182606 | 61    | 0.34 | 0.25 | 0.016 | 0.092  | NA |
| chr3 | 44770936  | 44771137  | ZNF501        | ENSG00000186446 | -52   | 0.3  | 0.16 | 0.016 | 0.14   | NA |
| chr3 | 107940930 | 107941503 | IFT57         | ENSG00000114446 | -9    | 0.17 | 0.3  | 0.016 | -0.13  | NA |
| chr3 | 142837885 | 142840838 | CHST2         | ENSG00000175040 | 1188  | 0.28 | 0.23 | 0.016 | 0.055  | NA |
| chr3 | 40566129  | 40566689  | ZNF621        | ENSG00000172888 | 40    | 0.3  | 0.17 | 0.017 | 0.13   | NA |
| chr3 | 57541931  | 57543244  | PDE12         | ENSG00000174840 | 584   | 0.22 | 0.16 | 0.017 | 0.063  | NA |
| chr3 | 134092257 | 134093741 | AMOTL2        | ENSG00000114019 | -369  | 0.32 | 0.22 | 0.017 | 0.1    | NA |
| chr3 | 18485112  | 18487056  | TBC1D5        | ENSG00000131374 | 225   | 0.3  | 0.22 | 0.018 | 0.086  | NA |
| chr3 | 20081458  | 20082426  | KAT2B         | ENSG00000114166 | 427   | 0.27 | 0.17 | 0.018 | 0.11   | NA |
| chr3 | 57993838  | 57994704  | FLNB          | ENSG00000136068 | 144   | 0.28 | 0.19 | 0.018 | 0.09   | NA |
| chr3 | 100053448 | 100053953 | NIT2          | ENSG00000114021 | 155   | 0.35 | 0.17 | 0.018 | 0.18   | NA |
| chr3 | 169379437 | 169381056 | MECOM         | ENSG00000085276 | 932   | 0.3  | 0.21 | 0.018 | 0.094  | NA |
| chr3 | 179168735 | 179169593 | GNB4          | ENSG00000114450 | -231  | 0.3  | 0.2  | 0.018 | 0.099  | NA |
| chr3 | 195162891 | 195164119 | ACAP2         | ENSG00000114331 | -500  | 0.45 | 0.27 | 0.018 | 0.18   | NA |
| chr3 | 196295341 | 196295796 | WDR53         | ENSG00000185798 | -175  | 0.26 | 0.17 | 0.018 | 0.09   | NA |
| chr3 | 38065743  | 38066822  | PLCD1         | ENSG00000187091 | -215  | 0.18 | 0.26 | 0.019 | -0.087 | NA |
| chr3 | 45266477  | 45268039  | AC010170.1    | ENSG00000178550 | 261   | 0.29 | 0.19 | 0.019 | 0.094  | NA |
| chr3 | 51989763  | 51990639  | GPR62         | ENSG00000180929 | 871   | 0.31 | 0.17 | 0.019 | 0.14   | NA |
| chr3 | 52231942  | 52232541  | ALAS1         | ENSG00000023330 | 139   | 0.29 | 0.2  | 0.019 | 0.093  | NA |
| chr3 | 112738244 | 112738653 | RP11-572M11.4 | ENSG00000240057 | 69    | 0.31 | 0.19 | 0.019 | 0.12   | NA |
| chr3 | 133613566 | 133615174 | RAB6B         | ENSG00000154917 | -73   | 0.33 | 0.23 | 0.019 | 0.1    | NA |
| chr3 | 57994921  | 57995218  | FLNB          | ENSG00000136068 | 942   | 0.35 | 0.15 | 0.02  | 0.2    | NA |
| chr3 | 156272636 | 156273099 | SSR3          | ENSG00000114850 | 39    | 0.31 | 0.17 | 0.02  | 0.14   | NA |

|      |           |           |               |                 |       |      |      |       |       |    |
|------|-----------|-----------|---------------|-----------------|-------|------|------|-------|-------|----|
| chr3 | 157822973 | 157823836 | SHOX2         | ENSG00000168779 | -321  | 0.28 | 0.17 | 0.02  | 0.11  | NA |
| chr3 | 10183305  | 10183941  | VHL           | ENSG00000134086 | 151   | 0.3  | 0.2  | 0.021 | 0.1   | NA |
| chr3 | 42304944  | 42305311  | CCK           | ENSG00000187094 | 312   | 1    | 0.15 | 0.021 | 0.85  | NA |
| chr3 | 122631722 | 122632854 | SEMA5B        | ENSG00000082684 | -1174 | 0.94 | 0.87 | 0.021 | 0.073 | NA |
| chr3 | 123303339 | 123303929 | PTPLB         | ENSG00000206527 | -232  | 0.25 | 0.14 | 0.021 | 0.11  | NA |
| chr3 | 193720953 | 193721291 | RP11-699L21.1 | ENSG00000214146 | 303   | 0.35 | 0.14 | 0.021 | 0.21  | NA |
| chr3 | 194980332 | 194981275 | C3orf21       | ENSG00000173950 | 6     | 0.33 | 0.22 | 0.021 | 0.11  | NA |
| chr3 | 69788483  | 69789208  | MITF          | ENSG00000187098 | 259   | 0.24 | 0.15 | 0.022 | 0.089 | NA |
| chr3 | 49027116  | 49028356  | P4HTM         | ENSG00000178467 | 417   | 0.24 | 0.16 | 0.023 | 0.08  | NA |
| chr3 | 79815638  | 79815900  | ROBO1         | ENSG00000169855 | 1196  | 0.17 | 1    | 0.023 | -0.83 | NA |
| chr3 | 148709076 | 148710069 | GYG1          | ENSG00000163754 | 444   | 0.25 | 0.16 | 0.024 | 0.085 | NA |
| chr3 | 138327500 | 138328185 | FAIM          | ENSG00000158234 | 300   | 0.26 | 0.17 | 0.025 | 0.087 | NA |
| chr3 | 11887799  | 11888538  | C3orf31       | ENSG00000144559 | 78    | 0.29 | 0.45 | 0.026 | -0.16 | NA |
| chr3 | 37217053  | 37218129  | LRRFIP2       | ENSG00000093167 | -43   | 0.22 | 0.15 | 0.026 | 0.071 | NA |
| chr3 | 45635090  | 45635932  | LIMD1         | ENSG00000144791 | -305  | 0.3  | 0.21 | 0.026 | 0.096 | NA |
| chr3 | 52007710  | 52008248  | PCBP4         | ENSG00000090097 | 53    | 0.3  | 0.19 | 0.026 | 0.11  | NA |
| chr3 | 114865436 | 114867124 | ZBTB20        | ENSG00000181722 | -168  | 0.26 | 0.18 | 0.026 | 0.078 | NA |
| chr3 | 187871478 | 187872354 | LPP           | ENSG00000145012 | 256   | 0.17 | 0.26 | 0.026 | -0.09 | NA |
| chr3 | 9974379   | 9975722   | CRELD1        | ENSG00000163703 | -456  | 0.29 | 0.22 | 0.027 | 0.075 | NA |
| chr3 | 53527927  | 53530106  | CACNA1D       | ENSG00000157388 | 333   | 0.26 | 0.19 | 0.027 | 0.067 | NA |
| chr3 | 119421855 | 119422334 | C3orf15       | ENSG00000183833 | 225   | 0.37 | 0.24 | 0.027 | 0.13  | NA |
| chr3 | 184429366 | 184429907 | MAGEF1        | ENSG00000177383 | 200   | 0.31 | 0.17 | 0.027 | 0.14  | NA |
| chr3 | 186524095 | 186524694 | RFC4          | ENSG00000163918 | -250  | 0.34 | 0.23 | 0.027 | 0.11  | NA |
| chr3 | 196594576 | 196595486 | SENP5         | ENSG00000119231 | 304   | 0.31 | 0.2  | 0.027 | 0.11  | NA |
| chr3 | 53925438  | 53926174  | RP11-884K10.5 | ENSG00000113811 | 76    | 0.35 | 0.22 | 0.028 | 0.13  | NA |
| chr3 | 69591011  | 69592050  | FRMD4B        | ENSG00000114541 | 204   | 0.23 | 0.17 | 0.028 | 0.067 | NA |
| chr3 | 56835650  | 56836210  | ARHGEF3       | ENSG00000163947 | 47    | 0.34 | 0.19 | 0.029 | 0.15  | NA |
| chr3 | 142315171 | 142315567 | PLS1          | ENSG00000120756 | 140   | 0.29 | 0.17 | 0.029 | 0.12  | NA |
| chr3 | 45430016  | 45430237  | LARS2         | ENSG00000011376 | 73    | 0.32 | 0.14 | 0.03  | 0.18  | NA |
| chr3 | 50336331  | 50336879  | NAT6          | ENSG00000243477 | -57   | 0.6  | 0.23 | 0.03  | 0.37  | NA |

|      |           |           |               |                  |      |      |      |       |       |    |
|------|-----------|-----------|---------------|------------------|------|------|------|-------|-------|----|
| chr3 | 52489417  | 52490008  | NISCH         | ENSG00000010322  | 188  | 0.33 | 0.19 | 0.03  | 0.15  | NA |
| chr3 | 157827760 | 157828197 | RSRC1         | ENSG000000174891 | 137  | 0.35 | 0.2  | 0.03  | 0.14  | NA |
| chr3 | 133969033 | 133970009 | RYK           | ENSG000000163785 | -84  | 0.22 | 0.14 | 0.031 | 0.073 | NA |
| chr3 | 140949911 | 140950963 | ACPL2         | ENSG000000155893 | -230 | 0.26 | 0.17 | 0.031 | 0.09  | NA |
| chr3 | 185303822 | 185304497 | SENP2         | ENSG000000163904 | 197  | 0.3  | 0.19 | 0.031 | 0.11  | NA |
| chr3 | 49377340  | 49377854  | USP4          | ENSG000000114316 | -135 | 0.24 | 0.17 | 0.033 | 0.076 | NA |
| chr3 | 128712404 | 128713058 | KIAA1257      | ENSG000000114656 | 188  | 0.35 | 0.22 | 0.033 | 0.13  | NA |
| chr3 | 178978948 | 178979364 | LRRFIP1P1     | ENSG000000240429 | -95  | 0.42 | 0.23 | 0.034 | 0.19  | NA |
| chr3 | 186648174 | 186649103 | ST6GAL1       | ENSG000000073849 | 364  | 0.28 | 0.2  | 0.034 | 0.082 | NA |
| chr3 | 156892554 | 156893036 | RP11-550I24.2 | ENSG000000243176 | -217 | 0.34 | 0.18 | 0.035 | 0.15  | NA |
| chr3 | 169940157 | 169940778 | PRKCI         | ENSG000000163558 | 314  | 0.21 | 0.13 | 0.035 | 0.071 | NA |
| chr3 | 190580504 | 190580899 | RP11-332P22.1 | ENSG000000205835 | -236 | 0.32 | 0.21 | 0.035 | 0.11  | NA |
| chr3 | 32433104  | 32434162  | CMTM7         | ENSG000000153551 | 470  | 0.26 | 0.19 | 0.036 | 0.068 | NA |
| chr3 | 75834254  | 75834761  | ZNF717        | ENSG000000227124 | -252 | 0.42 | 0.34 | 0.036 | 0.086 | NA |
| chr3 | 51421986  | 51423031  | MANF          | ENSG000000145050 | 30   | 0.23 | 0.16 | 0.037 | 0.069 | NA |
| chr3 | 75483802  | 75485289  | FAM86DP       | ENSG000000244026 | -437 | 0.3  | 0.17 | 0.037 | 0.13  | NA |
| chr3 | 133502561 | 133502963 | SRPRB         | ENSG000000144867 | -115 | 0.91 | 0.75 | 0.037 | 0.17  | NA |
| chr3 | 13974400  | 13974867  | RP11-271E2.1  | ENSG000000250439 | 80   | 0.42 | 0.27 | 0.038 | 0.15  | NA |
| chr3 | 49236567  | 49237328  | CCDC36        | ENSG000000173421 | 14   | 0.48 | 0.34 | 0.038 | 0.15  | NA |
| chr3 | 197391889 | 197392481 | AC024560.2    | ENSG000000236833 | 443  | 0.24 | 0.1  | 0.038 | 0.14  | NA |
| chr3 | 101497830 | 101498648 | FAM55C        | ENSG000000144815 | 193  | 0.24 | 0.15 | 0.039 | 0.089 | NA |
| chr3 | 156543891 | 156544405 | RP11-6F2.7    | ENSG000000197980 | 59   | 0.32 | 0.22 | 0.039 | 0.1   | NA |
| chr3 | 57204169  | 57204417  | IL17RD        | ENSG000000144730 | 30   | 0.29 | 0.63 | 0.04  | -0.35 | NA |
| chr3 | 128902134 | 128902978 | CNBP          | ENSG000000169714 | 151  | 0.4  | 0.25 | 0.04  | 0.15  | NA |
| chr3 | 13034850  | 13036687  | IQSEC1        | ENSG000000144711 | 858  | 0.33 | 0.24 | 0.041 | 0.097 | NA |
| chr3 | 9833992   | 9834985   | TADA3         | ENSG000000171148 | -396 | 0.22 | 0.16 | 0.042 | 0.059 | NA |
| chr3 | 33759206  | 33759911  | CLASP2        | ENSG000000163539 | -56  | 0.23 | 0.13 | 0.042 | 0.1   | NA |
| chr3 | 49044132  | 49045576  | WDR6          | ENSG000000178252 | 359  | 0.23 | 0.17 | 0.042 | 0.068 | NA |
| chr3 | 131221604 | 131221888 | MRPL3         | ENSG000000114686 | 35   | 0.36 | 0.11 | 0.043 | 0.25  | NA |
| chr3 | 5019876   | 5022223   | BHLHE40       | ENSG000000134107 | 248  | 0.35 | 0.25 | 0.045 | 0.096 | NA |

|      |           |           |               |                 |      |      |      |       |        |    |
|------|-----------|-----------|---------------|-----------------|------|------|------|-------|--------|----|
| chr3 | 113233663 | 113234094 | SPICE1        | ENSG00000163611 | -189 | 0.25 | 0.16 | 0.046 | 0.089  | NA |
| chr3 | 49823482  | 49824346  | IP6K1         | ENSG00000176095 | -287 | 0.21 | 0.14 | 0.048 | 0.069  | NA |
| chr3 | 141120983 | 141121678 | ZBTB38        | ENSG00000177311 | 139  | 0.31 | 0.21 | 0.048 | 0.11   | NA |
| chr3 | 18466298  | 18466604  | SATB1         | ENSG00000182568 | -219 | 0.35 | 0.21 | 0.049 | 0.14   | NA |
| chr3 | 48677529  | 48677877  | CELSR3        | ENSG00000008300 | 1867 | 0.88 | 0.97 | 0.051 | -0.09  | NA |
| chr3 | 129033540 | 129035646 | RP13-685P2.5  | ENSG00000206417 | 358  | 0.24 | 0.2  | 0.051 | 0.048  | NA |
| chr3 | 178789305 | 178789827 | ZMAT3         | ENSG00000172667 | -212 | 0.28 | 0.16 | 0.051 | 0.11   | NA |
| chr3 | 110790149 | 110791401 | RP11-553A10.2 | ENSG00000242242 | -565 | 0.25 | 0.19 | 0.052 | 0.063  | NA |
| chr3 | 38035701  | 38036000  | VILL          | ENSG00000136059 | 206  | 0.27 | 0.41 | 0.055 | -0.14  | NA |
| chr3 | 126074783 | 126076865 | KLF15         | ENSG00000163884 | 461  | 0.27 | 0.21 | 0.055 | 0.059  | NA |
| chr3 | 38206498  | 38207642  | OXSR1         | ENSG00000172939 | 490  | 0.13 | 0.26 | 0.056 | -0.13  | NA |
| chr3 | 155588009 | 155589602 | GMPS          | ENSG00000163655 | 480  | 0.23 | 0.17 | 0.056 | 0.054  | NA |
| chr3 | 196296016 | 196296290 | FBXO45        | ENSG00000174013 | 594  | 0.39 | 0.15 | 0.056 | 0.25   | NA |
| chr3 | 11313889  | 11314137  | ATG7          | ENSG00000197548 | 18   | 0.17 | 0.28 | 0.057 | -0.11  | NA |
| chr3 | 44379532  | 44380310  | C3orf23       | ENSG00000179152 | 310  | 0.26 | 0.17 | 0.059 | 0.091  | NA |
| chr3 | 133292203 | 133292908 | CDV3          | ENSG00000091527 | -19  | 0.33 | 0.2  | 0.06  | 0.13   | NA |
| chr3 | 64253533  | 64253819  | PRICKLE2      | ENSG00000163637 | -21  | 0.42 | 0.26 | 0.061 | 0.16   | NA |
| chr3 | 96532023  | 96533625  | EPHA6         | ENSG00000080224 | -601 | 0.28 | 0.22 | 0.061 | 0.067  | NA |
| chr3 | 98451286  | 98452225  | ST3GAL6       | ENSG00000064225 | 461  | 0.29 | 0.2  | 0.062 | 0.093  | NA |
| chr3 | 153838787 | 153840380 | ARHGEF26      | ENSG00000114790 | 791  | 0.27 | 0.19 | 0.063 | 0.076  | NA |
| chr3 | 10067898  | 10068265  | CIDECP        | ENSG00000186162 | -71  | 0.32 | 0.21 | 0.064 | 0.11   | NA |
| chr3 | 24535844  | 24537436  | THRB          | ENSG00000151090 | -463 | 0.28 | 0.21 | 0.064 | 0.062  | NA |
| chr3 | 63897392  | 63898299  | ATXN7         | ENSG00000163635 | 240  | 0.3  | 0.22 | 0.066 | 0.086  | NA |
| chr3 | 120067499 | 120068531 | LRRC58        | ENSG00000163428 | 171  | 0.31 | 0.21 | 0.067 | 0.095  | NA |
| chr3 | 42632164  | 42632667  | SS18L2        | ENSG00000008324 | 117  | 0.41 | 0.25 | 0.068 | 0.16   | NA |
| chr3 | 53381345  | 53381936  | DCP1A         | ENSG00000162290 | -88  | 0.18 | 0.26 | 0.068 | -0.078 | NA |
| chr3 | 98620131  | 98620910  | DCBLD2        | ENSG00000057019 | -350 | 0.21 | 0.15 | 0.068 | 0.061  | NA |
| chr3 | 28389975  | 28390855  | AZI2          | ENSG00000163512 | -295 | 0.15 | 0.21 | 0.074 | -0.064 | NA |
| chr3 | 122512485 | 122512798 | HSPBAP1       | ENSG00000169087 | -134 | 0.19 | 0.11 | 0.074 | 0.079  | NA |
| chr3 | 12200183  | 12200532  | SYN2          | ENSG00000157152 | 208  | 0.91 | 0.7  | 0.076 | 0.21   | NA |

|      |           |           |               |                 |      |      |      |       |        |    |
|------|-----------|-----------|---------------|-----------------|------|------|------|-------|--------|----|
| chr3 | 44902959  | 44903623  | TMEM42        | ENSG00000169964 | -70  | 0.31 | 0.21 | 0.077 | 0.091  | NA |
| chr3 | 121264469 | 121264943 | POLQ          | ENSG00000051341 | 147  | 0.26 | 0.39 | 0.079 | -0.13  | NA |
| chr3 | 15642770  | 15643581  | BTD           | ENSG00000169814 | 327  | 0.55 | 0.36 | 0.08  | 0.19   | NA |
| chr3 | 46923265  | 46925182  | MYL3          | ENSG00000160808 | -564 | 0.28 | 0.22 | 0.08  | 0.051  | NA |
| chr3 | 128997958 | 128998303 | C3orf37       | ENSG00000183624 | 282  | 0.56 | 0.29 | 0.08  | 0.27   | NA |
| chr3 | 49893810  | 49894216  | TRAIP         | ENSG00000183763 | -106 | 0.18 | 0.12 | 0.083 | 0.065  | NA |
| chr3 | 182510866 | 182512282 | RP11-225N10.1 | ENSG00000240063 | -392 | 0.31 | 0.23 | 0.083 | 0.08   | NA |
| chr3 | 194392808 | 194393378 | LSG1          | ENSG00000041802 | -202 | 0.38 | 0.2  | 0.083 | 0.18   | NA |
| chr3 | 195269553 | 195270363 | PPP1R2        | ENSG00000184203 | 23   | 0.33 | 0.22 | 0.083 | 0.11   | NA |
| chr3 | 14692931  | 14693429  | C3orf19       | ENSG00000154781 | -91  | 0.32 | 0.12 | 0.084 | 0.2    | NA |
| chr3 | 113464437 | 113465159 | NAA50         | ENSG00000121579 | -157 | 0.24 | 0.18 | 0.084 | 0.065  | NA |
| chr3 | 15373314  | 15374209  | SH3BP5        | ENSG00000131370 | -191 | 0.17 | 0.24 | 0.085 | -0.069 | NA |
| chr3 | 145878430 | 145879287 | PLOD2         | ENSG00000152952 | -80  | 0.28 | 0.21 | 0.085 | 0.074  | NA |
| chr3 | 50191971  | 50193130  | SEMA3F        | ENSG00000001617 | 72   | 0.25 | 0.2  | 0.087 | 0.053  | NA |
| chr3 | 97540664  | 97541633  | AC110491.1    | ENSG00000233280 | 264  | 0.22 | 0.16 | 0.087 | 0.056  | NA |
| chr3 | 129158602 | 129159477 | MBD4          | ENSG00000129071 | -363 | 0.28 | 0.2  | 0.087 | 0.078  | NA |
| chr3 | 50712068  | 50713007  | DOCK3         | ENSG00000088538 | -135 | 0.34 | 0.26 | 0.088 | 0.08   | NA |
| chr3 | 101394976 | 101396096 | AC084198.1    | ENSG00000256628 | 262  | 0.35 | 0.27 | 0.088 | 0.08   | NA |
| chr3 | 107809375 | 107810543 | CD47          | ENSG00000196776 | -98  | 0.29 | 0.21 | 0.088 | 0.082  | NA |
| chr3 | 195384521 | 195385580 | AC069513.4    | ENSG00000229178 | -252 | 0.15 | 0.29 | 0.089 | -0.15  | NA |
| chr3 | 19189688  | 19190100  | KCNH8         | ENSG00000183960 | -52  | 0.14 | 0.23 | 0.093 | -0.093 | NA |
| chr3 | 139258152 | 139258731 | RBP1          | ENSG00000114115 | 89   | 0.26 | 0.19 | 0.093 | 0.068  | NA |
| chr3 | 127541270 | 127542048 | MGLL          | ENSG00000074416 | 42   | 0.2  | 0.27 | 0.094 | -0.075 | NA |
| chr3 | 48955810  | 48956938  | ARIH2         | ENSG00000177479 | 120  | 0.29 | 0.23 | 0.095 | 0.059  | NA |
| chr3 | 52188271  | 52189037  | POC1A         | ENSG00000164087 | -234 | 0.32 | 0.19 | 0.096 | 0.13   | NA |
| chr3 | 195622187 | 195623033 | TNK2          | ENSG00000061938 | -178 | 0.27 | 0.19 | 0.098 | 0.078  | NA |
| chr3 | 79067882  | 79068566  | ROBO1         | ENSG00000169855 | -59  | 0.24 | 0.37 | 0.099 | -0.13  | NA |
| chr3 | 27524934  | 27526180  | SLC4A7        | ENSG00000033867 | 281  | 0.22 | 0.16 | 0.1   | 0.063  | NA |
| chr3 | 42814567  | 42814893  | CCDC13        | ENSG00000244607 | 5    | 0.19 | 0.27 | 0.1   | -0.079 | NA |
| chr3 | 50275393  | 50275645  | GNAI2         | ENSG00000114353 | -25  | 0.18 | 0.29 | 0.1   | -0.11  | NA |

|      |           |           |               |                 |       |      |      |      |        |    |
|------|-----------|-----------|---------------|-----------------|-------|------|------|------|--------|----|
| chr3 | 122745183 | 122746986 | SEMA5B        | ENSG00000082684 | 341   | 0.24 | 0.19 | 0.1  | 0.047  | NA |
| chr3 | 126242783 | 126243358 | CHST13        | ENSG00000180767 | -56   | 0.21 | 0.14 | 0.1  | 0.075  | NA |
| chr3 | 142297219 | 142297849 | ATR           | ENSG00000175054 | 32    | 0.29 | 0.2  | 0.1  | 0.09   | NA |
| chr3 | 147113608 | 147114479 | ZIC4          | ENSG00000174963 | 930   | 0.16 | 0.25 | 0.1  | -0.091 | NA |
| chr3 | 5163838   | 5164540   | ARL8B         | ENSG00000134108 | 284   | 0.22 | 0.32 | 0.11 | -0.098 | NA |
| chr3 | 8808961   | 8811280   | OXTR          | ENSG00000180914 | 243   | 0.32 | 0.26 | 0.11 | 0.055  | NA |
| chr3 | 14219715  | 14220408  | LSM3          | ENSG00000170860 | 203   | 0.25 | 0.17 | 0.11 | 0.086  | NA |
| chr3 | 23957941  | 23959181  | RPL15         | ENSG00000174748 | 525   | 0.31 | 0.22 | 0.11 | 0.086  | NA |
| chr3 | 33259919  | 33260763  | SUSD5         | ENSG00000173705 | -56   | 0.25 | 0.19 | 0.11 | 0.055  | NA |
| chr3 | 50297440  | 50298097  | U73166.2      | ENSG00000230454 | 33    | 0.29 | 0.13 | 0.11 | 0.16   | NA |
| chr3 | 52017056  | 52017592  | ACY1          | ENSG00000243989 | -32   | 0.22 | 0.16 | 0.11 | 0.063  | NA |
| chr3 | 52321783  | 52322054  | GLYCTK        | ENSG00000168237 | 82    | 0.24 | 0.15 | 0.11 | 0.087  | NA |
| chr3 | 150421183 | 150421879 | RP11-103G8.2  | ENSG00000240137 | 180   | 0.25 | 0.36 | 0.11 | -0.11  | NA |
| chr3 | 155027498 | 155027703 | PABPC1P10     | ENSG00000239443 | -4    | 0.99 | 0.91 | 0.11 | 0.075  | NA |
| chr3 | 179322346 | 179322788 | MRPL47        | ENSG00000136522 | -139  | 0.28 | 0.17 | 0.11 | 0.1    | NA |
| chr3 | 183967304 | 183967801 | ALG3          | ENSG00000214160 | -244  | 0.27 | 0.19 | 0.11 | 0.084  | NA |
| chr3 | 183977548 | 183980633 | CAMK2N2       | ENSG00000163888 | 161   | 0.27 | 0.22 | 0.11 | 0.054  | NA |
| chr3 | 196438874 | 196439734 | CEP19         | ENSG00000174007 | -185  | 0.23 | 0.18 | 0.11 | 0.053  | NA |
| chr3 | 4345005   | 4345342   | SETMAR        | ENSG00000170364 | 157   | 0.23 | 0.75 | 0.12 | -0.52  | NA |
| chr3 | 62354291  | 62355012  | RP11-204J18.3 | ENSG00000241472 | 350   | 0.37 | 0.24 | 0.12 | 0.14   | NA |
| chr3 | 67704628  | 67705051  | SUCLG2        | ENSG00000172340 | 192   | 0.23 | 0.17 | 0.12 | 0.06   | NA |
| chr3 | 128722283 | 128723036 | KIAA1257      | ENSG00000114656 | -1126 | 0.21 | 0.31 | 0.12 | -0.093 | NA |
| chr3 | 135684570 | 135685367 | PPP2R3A       | ENSG00000073711 | 382   | 0.3  | 0.2  | 0.12 | 0.1    | NA |
| chr3 | 169755594 | 169756847 | GPR160        | ENSG00000173890 | 503   | 0.3  | 0.24 | 0.12 | 0.063  | NA |
| chr3 | 11034446  | 11035384  | SLC6A1        | ENSG00000157103 | 495   | 0.31 | 0.22 | 0.13 | 0.091  | NA |
| chr3 | 12329427  | 12330333  | PPARG         | ENSG00000132170 | -457  | 0.25 | 0.18 | 0.13 | 0.07   | NA |
| chr3 | 32544018  | 32544325  | CMTM6         | ENSG00000091317 | 117   | 0.26 | 0.17 | 0.13 | 0.092  | NA |
| chr3 | 42542820  | 42544524  | VIPR1         | ENSG00000114812 | 268   | 0.2  | 0.15 | 0.13 | 0.051  | NA |
| chr3 | 48229077  | 48230285  | CDC25A        | ENSG00000164045 | -225  | 0.27 | 0.21 | 0.13 | 0.052  | NA |
| chr3 | 48487793  | 48488581  | RP11-24C3.2   | ENSG00000244380 | -151  | 0.24 | 0.31 | 0.13 | -0.075 | NA |

|      |           |           |               |                 |      |      |      |      |        |    |
|------|-----------|-----------|---------------|-----------------|------|------|------|------|--------|----|
| chr3 | 50606345  | 50606972  | HEMK1         | ENSG00000114735 | 75   | 0.13 | 0.21 | 0.13 | -0.082 | NA |
| chr3 | 65534684  | 65535344  | MAGI1         | ENSG00000151276 | 161  | 0.25 | 0.19 | 0.13 | 0.059  | NA |
| chr3 | 73159857  | 73160140  | U2            | ENSG00000223247 | -145 | 0.94 | 1    | 0.13 | -0.064 | NA |
| chr3 | 87841796  | 87842563  | RP11-451B8.1  | ENSG00000239572 | 600  | 0.28 | 0.19 | 0.13 | 0.088  | NA |
| chr3 | 99594969  | 99595215  | FILIP1L       | ENSG00000168386 | -104 | 0.23 | 0.16 | 0.13 | 0.069  | NA |
| chr3 | 119217308 | 119217756 | C3orf1        | ENSG00000113845 | 153  | 0.32 | 0.46 | 0.13 | -0.13  | NA |
| chr3 | 126193683 | 126195495 | ZXDC          | ENSG00000070476 | -759 | 0.22 | 0.17 | 0.13 | 0.045  | NA |
| chr3 | 157821232 | 157821604 | SHOX2         | ENSG00000168779 | -742 | 0.24 | 0.16 | 0.13 | 0.081  | NA |
| chr3 | 178866068 | 178866908 | PIK3CA        | ENSG00000121879 | 177  | 0.39 | 0.27 | 0.13 | 0.12   | NA |
| chr3 | 196014248 | 196015104 | PCYT1A        | ENSG00000161217 | -142 | 0.28 | 0.21 | 0.13 | 0.069  | NA |
| chr3 | 55520226  | 55522344  | WNT5A         | ENSG00000114251 | -186 | 0.38 | 0.3  | 0.14 | 0.072  | NA |
| chr3 | 57678339  | 57678938  | FAM116A       | ENSG00000174839 | -67  | 0.27 | 0.2  | 0.14 | 0.069  | NA |
| chr3 | 139108249 | 139108985 | COPB2         | ENSG00000184432 | -215 | 0.36 | 0.22 | 0.14 | 0.14   | NA |
| chr3 | 141205983 | 141206760 | RASA2         | ENSG00000155903 | 480  | 0.23 | 0.16 | 0.14 | 0.064  | NA |
| chr3 | 150321002 | 150321791 | SERP1         | ENSG00000120742 | -381 | 0.21 | 0.15 | 0.14 | 0.063  | NA |
| chr3 | 46734731  | 46735717  | ALS2CL        | ENSG00000178038 | -81  | 0.29 | 0.23 | 0.15 | 0.063  | NA |
| chr3 | 52312069  | 52313057  | WDR82         | ENSG00000164091 | -226 | 0.25 | 0.2  | 0.15 | 0.049  | NA |
| chr3 | 105587279 | 105588218 | CBLB          | ENSG00000114423 | 139  | 0.26 | 0.21 | 0.15 | 0.051  | NA |
| chr3 | 145968334 | 145969008 | PLSCR4        | ENSG00000114698 | -17  | 0.27 | 0.16 | 0.15 | 0.11   | NA |
| chr3 | 183165238 | 183165667 | RP11-393B14.1 | ENSG00000240024 | 56   | 0.17 | 0.27 | 0.15 | -0.093 | NA |
| chr3 | 10149750  | 10150066  | C3orf24       | ENSG00000163705 | -140 | 0.67 | 0.48 | 0.16 | 0.18   | NA |
| chr3 | 18467440  | 18467664  | SATB1         | ENSG00000182568 | -691 | 0.21 | 0.12 | 0.16 | 0.094  | NA |
| chr3 | 42845436  | 42846355  | HIGD1A        | ENSG00000181061 | 30   | 0.21 | 0.16 | 0.16 | 0.045  | NA |
| chr3 | 45017329  | 45018136  | ZDHHC3        | ENSG00000163812 | -74  | 0.25 | 0.19 | 0.16 | 0.062  | NA |
| chr3 | 66271076  | 66271718  | SLC25A26      | ENSG00000144741 | 229  | 0.28 | 0.2  | 0.16 | 0.077  | NA |
| chr3 | 125986044 | 125986727 | RP11-71E19.1  | ENSG00000250934 | 725  | 0.33 | 0.26 | 0.16 | 0.075  | NA |
| chr3 | 150125972 | 150128689 | TSC22D2       | ENSG00000196428 | 1250 | 0.23 | 0.19 | 0.16 | 0.039  | NA |
| chr3 | 154797398 | 154797988 | MME           | ENSG00000196549 | 257  | 0.21 | 0.39 | 0.16 | -0.19  | NA |
| chr3 | 167097927 | 167098198 | ZBBX          | ENSG00000169064 | 9    | 0.27 | 0.17 | 0.16 | 0.096  | NA |
| chr3 | 170074786 | 170076070 | SKIL          | ENSG00000136603 | -38  | 0.29 | 0.23 | 0.16 | 0.056  | NA |



|      |           |           |               |                 |       |      |      |      |        |    |
|------|-----------|-----------|---------------|-----------------|-------|------|------|------|--------|----|
| chr3 | 183903386 | 183904495 | ABCF3         | ENSG00000161204 | 129   | 0.27 | 0.2  | 0.16 | 0.061  | NA |
| chr3 | 9791123   | 9792011   | OGG1          | ENSG00000114026 | -61   | 0.25 | 0.34 | 0.17 | -0.091 | NA |
| chr3 | 9987895   | 9989619   | AC018809.6    | ENSG00000230082 | -331  | 0.25 | 0.21 | 0.17 | 0.039  | NA |
| chr3 | 32279423  | 32280742  | CMTM8         | ENSG00000170293 | -89   | 0.29 | 0.36 | 0.17 | -0.062 | NA |
| chr3 | 47323747  | 47324607  | KIF9          | ENSG00000088727 | -169  | 0.27 | 0.22 | 0.17 | 0.055  | NA |
| chr3 | 50358378  | 50359606  | HYAL2         | ENSG00000068001 | -613  | 0.26 | 0.2  | 0.17 | 0.06   | NA |
| chr3 | 112280022 | 112280950 | ATG3          | ENSG00000144848 | -6    | 0.29 | 0.23 | 0.17 | 0.061  | NA |
| chr3 | 122233408 | 122233944 | KPNA1         | ENSG00000114030 | 77    | 0.27 | 0.2  | 0.17 | 0.064  | NA |
| chr3 | 128764540 | 128766055 | RP11-434H6.2  | ENSG00000249505 | 691   | 0.52 | 0.48 | 0.17 | 0.039  | NA |
| chr3 | 141497158 | 141497492 | GRK7          | ENSG00000114124 | 335   | 0.99 | 0.96 | 0.17 | 0.034  | NA |
| chr3 | 169529875 | 169530435 | LRRC34        | ENSG00000171757 | 147   | 0.26 | 0.19 | 0.17 | 0.07   | NA |
| chr3 | 197686919 | 197687334 | IQCG          | ENSG00000114473 | -113  | 0.23 | 0.14 | 0.17 | 0.093  | NA |
| chr3 | 13611923  | 13612435  | FBLN2         | ENSG00000163520 | 1939  | 0.63 | 0.71 | 0.18 | -0.081 | NA |
| chr3 | 15468932  | 15469432  | METTL6        | ENSG00000206562 | -157  | 0.23 | 0.16 | 0.18 | 0.073  | NA |
| chr3 | 53194716  | 53196133  | PRKCD         | ENSG00000163932 | 288   | 0.25 | 0.21 | 0.18 | 0.037  | NA |
| chr3 | 113251699 | 113252290 | SIDT1         | ENSG00000072858 | -30   | 0.35 | 0.23 | 0.18 | 0.13   | NA |
| chr3 | 142166202 | 142167026 | XRN1          | ENSG00000114127 | 220   | 0.27 | 0.2  | 0.18 | 0.068  | NA |
| chr3 | 195635359 | 195636895 | TNK2          | ENSG00000061938 | -172  | 0.26 | 0.21 | 0.18 | 0.047  | NA |
| chr3 | 48594022  | 48594853  | PFKFB4        | ENSG00000114268 | -181  | 0.35 | 0.25 | 0.2  | 0.099  | NA |
| chr3 | 52089652  | 52090845  | DUSP7         | ENSG00000164086 | -67   | 0.27 | 0.35 | 0.2  | -0.082 | NA |
| chr3 | 148803904 | 148804557 | RP11-464E15.4 | ENSG00000239718 | 111   | 0.3  | 0.22 | 0.2  | 0.087  | NA |
| chr3 | 160117012 | 160118878 | IFT80         | ENSG00000068885 | -912  | 0.19 | 0.23 | 0.2  | -0.038 | NA |
| chr3 | 171177829 | 171178964 | TNIK          | ENSG00000154310 | -544  | 0.35 | 0.26 | 0.2  | 0.087  | NA |
| chr3 | 172167526 | 172167866 | GHSR          | ENSG00000121853 | -1450 | 0.7  | 0.25 | 0.2  | 0.45   | NA |
| chr3 | 180707266 | 180707627 | DNAJC19       | ENSG00000205981 | -140  | 0.5  | 0.22 | 0.2  | 0.28   | NA |
| chr3 | 196229810 | 196230791 | RNF168        | ENSG00000163961 | 248   | 0.3  | 0.25 | 0.2  | 0.05   | NA |
| chr3 | 52279601  | 52280140  | PPM1M         | ENSG00000164088 | 29    | 0.22 | 0.17 | 0.21 | 0.057  | NA |
| chr3 | 53879638  | 53880831  | CHDH          | ENSG00000016391 | 183   | 0.18 | 0.23 | 0.21 | -0.051 | NA |
| chr3 | 56501868  | 56502345  | ERC2          | ENSG00000187672 | 259   | 0.4  | 0.29 | 0.21 | 0.11   | NA |
| chr3 | 180630152 | 180630996 | FXR1          | ENSG00000114416 | 304   | 0.24 | 0.32 | 0.21 | -0.077 | NA |

|      |           |           |               |                 |       |      |      |      |        |    |
|------|-----------|-----------|---------------|-----------------|-------|------|------|------|--------|----|
| chr3 | 27762351  | 27763995  | EOMES         | ENSG00000163508 | 630   | 0.23 | 0.2  | 0.22 | 0.035  | NA |
| chr3 | 32726517  | 32727149  | CNOT10        | ENSG00000182973 | 196   | 0.27 | 0.19 | 0.22 | 0.075  | NA |
| chr3 | 49314437  | 49314815  | C3orf62       | ENSG00000188315 | 26    | 0.23 | 0.4  | 0.22 | -0.17  | NA |
| chr3 | 50359839  | 50360042  | HYAL2         | ENSG00000068001 | 232   | 0.38 | 0.2  | 0.22 | 0.18   | NA |
| chr3 | 101292885 | 101293612 | PCNP          | ENSG00000081154 | 309   | 0.17 | 0.21 | 0.22 | -0.041 | NA |
| chr3 | 113666359 | 113667390 | ZDHHC23       | ENSG00000184307 | 126   | 0.23 | 0.18 | 0.22 | 0.044  | NA |
| chr3 | 125238496 | 125239201 | SNX4          | ENSG00000114520 | 177   | 0.17 | 0.23 | 0.22 | -0.059 | NA |
| chr3 | 39148377  | 39149400  | GORASP1       | ENSG00000114745 | -257  | 0.24 | 0.2  | 0.23 | 0.037  | NA |
| chr3 | 46933746  | 46934293  | PTH1R         | ENSG00000160801 | -192  | 0.3  | 0.19 | 0.23 | 0.11   | NA |
| chr3 | 47017879  | 47018312  | CCDC12        | ENSG00000160799 | 140   | 0.21 | 0.15 | 0.23 | 0.059  | NA |
| chr3 | 51533342  | 51534260  | VPRBP         | ENSG00000145041 | 209   | 0.3  | 0.22 | 0.23 | 0.081  | NA |
| chr3 | 124449178 | 124449461 | UMPS          | ENSG00000114491 | 106   | 0.28 | 0.2  | 0.23 | 0.077  | NA |
| chr3 | 125313986 | 125314609 | OSBPL11       | ENSG00000144909 | -363  | 0.29 | 0.12 | 0.23 | 0.17   | NA |
| chr3 | 170746072 | 170746292 | SLC2A2        | ENSG00000163581 | -1643 | 0.5  | 1    | 0.23 | -0.5   | NA |
| chr3 | 180397104 | 180397877 | CCDC39        | ENSG00000145075 | -202  | 0.28 | 0.23 | 0.23 | 0.05   | NA |
| chr3 | 186500738 | 186502048 | EIF4A2        | ENSG00000156976 | 399   | 0.21 | 0.27 | 0.23 | -0.058 | NA |
| chr3 | 47516997  | 47517650  | SCAP          | ENSG00000114650 | -236  | 0.25 | 0.18 | 0.24 | 0.07   | NA |
| chr3 | 98241409  | 98241711  | RP11-227H4.5  | ENSG00000248839 | 146   | 0.13 | 0.17 | 0.24 | -0.047 | NA |
| chr3 | 127770741 | 127771624 | SEC61A1       | ENSG00000058262 | -30   | 0.24 | 0.18 | 0.24 | 0.063  | NA |
| chr3 | 141205539 | 141205744 | RASA2         | ENSG00000155903 | -248  | 0.75 | 0.22 | 0.24 | 0.53   | NA |
| chr3 | 156533839 | 156535131 | RP11-392A22.2 | ENSG00000240875 | 338   | 0.2  | 0.24 | 0.24 | -0.036 | NA |
| chr3 | 183415602 | 183416069 | YEATS2        | ENSG00000163872 | 229   | 0.24 | 0.17 | 0.24 | 0.069  | NA |
| chr3 | 44726928  | 44727237  | RP11-944L7.4  | ENSG00000236869 | 63    | 0.2  | 0.28 | 0.25 | -0.076 | NA |
| chr3 | 50604905  | 50605359  | C3orf18       | ENSG00000088543 | -80   | 0.27 | 0.22 | 0.25 | 0.055  | NA |
| chr3 | 93781648  | 93782108  | DHFRL1        | ENSG00000178700 | -193  | 0.29 | 0.21 | 0.25 | 0.08   | NA |
| chr3 | 120314958 | 120315490 | NDUFB4        | ENSG00000065518 | 68    | 0.45 | 1    | 0.25 | -0.55  | NA |
| chr3 | 132135973 | 132136619 | DNAJC13       | ENSG00000138246 | -74   | 0.25 | 0.19 | 0.25 | 0.056  | NA |
| chr3 | 14443629  | 14444577  | SLC6A6        | ENSG00000131389 | 27    | 0.28 | 0.23 | 0.26 | 0.05   | NA |
| chr3 | 39851025  | 39851820  | MYRIP         | ENSG00000170011 | 326   | 0.23 | 0.19 | 0.26 | 0.037  | NA |
| chr3 | 50382889  | 50383310  | ZMYND10       | ENSG00000004838 | 4     | 0.22 | 0.31 | 0.26 | -0.093 | NA |

|      |           |           |              |                 |      |      |      |      |        |    |
|------|-----------|-----------|--------------|-----------------|------|------|------|------|--------|----|
| chr3 | 99536613  | 99537023  | C3orf26      | ENSG00000184220 | 140  | 0.3  | 0.21 | 0.26 | 0.092  | NA |
| chr3 | 169487145 | 169487522 | AC078802.1   | ENSG00000184378 | 350  | 0.2  | 0.12 | 0.26 | 0.08   | NA |
| chr3 | 170303044 | 170303249 | SLC7A14      | ENSG00000013293 | 670  | 0.31 | 0.23 | 0.26 | 0.075  | NA |
| chr3 | 170587936 | 170588270 | RPL22L1      | ENSG00000163584 | -119 | 0.25 | 0.2  | 0.26 | 0.052  | NA |
| chr3 | 112930437 | 112931506 | BOC          | ENSG00000144857 | -71  | 0.22 | 0.18 | 0.27 | 0.039  | NA |
| chr3 | 135914197 | 135916090 | MSL2         | ENSG00000174579 | -455 | 0.24 | 0.2  | 0.27 | 0.036  | NA |
| chr3 | 192125821 | 192127994 | FGF12        | ENSG00000114279 | -69  | 0.25 | 0.21 | 0.27 | 0.039  | NA |
| chr3 | 195477711 | 195477983 | MUC4         | ENSG00000145113 | 1544 | 0.98 | 0.9  | 0.27 | 0.076  | NA |
| chr3 | 44283239  | 44283838  | C3orf77      | ENSG00000173769 | 160  | 0.98 | 0.93 | 0.28 | 0.049  | NA |
| chr3 | 106959409 | 106959925 | RP11-280F2.2 | ENSG00000242759 | -193 | 0.25 | 0.2  | 0.28 | 0.054  | NA |
| chr3 | 119528920 | 119529159 | NR1I2        | ENSG00000144852 | -884 | 0.18 | 0.28 | 0.28 | -0.1   | NA |
| chr3 | 151986327 | 151987325 | MBNL1        | ENSG00000152601 | 131  | 0.25 | 0.2  | 0.28 | 0.046  | NA |
| chr3 | 10547178  | 10547389  | ATP2B2       | ENSG00000157087 | -15  | 0.24 | 0.14 | 0.29 | 0.1    | NA |
| chr3 | 11684192  | 11684930  | VGLL4        | ENSG00000144560 | 837  | 0.24 | 0.19 | 0.29 | 0.046  | NA |
| chr3 | 43663169  | 43663484  | ANO10        | ENSG00000160746 | 63   | 0.14 | 0.28 | 0.29 | -0.14  | NA |
| chr3 | 44596535  | 44597018  | ZNF167       | ENSG00000196345 | 91   | 0.24 | 0.13 | 0.29 | 0.11   | NA |
| chr3 | 64671087  | 64673957  | ADAMTS9      | ENSG00000163638 | -236 | 0.29 | 0.26 | 0.29 | 0.038  | NA |
| chr3 | 52570475  | 52570842  | C3orf78      | ENSG00000168273 | 40   | 0.21 | 0.25 | 0.3  | -0.043 | NA |
| chr3 | 99979678  | 99980038  | TBC1D23      | ENSG00000036054 | 14   | 0.27 | 0.38 | 0.3  | -0.11  | NA |
| chr3 | 170625831 | 170626841 | EIF5A2       | ENSG00000163577 | 51   | 0.32 | 0.24 | 0.3  | 0.08   | NA |
| chr3 | 12838471  | 12838782  | CAND2        | ENSG00000144712 | 447  | 0.44 | 0.35 | 0.31 | 0.093  | NA |
| chr3 | 25705556  | 25706570  | TOP2B        | ENSG00000077097 | -275 | 0.27 | 0.24 | 0.31 | 0.035  | NA |
| chr3 | 61546328  | 61549669  | PTPRG        | ENSG00000144724 | 755  | 0.25 | 0.23 | 0.31 | 0.021  | NA |
| chr3 | 120169202 | 120170519 | FSTL1        | ENSG00000163430 | -53  | 0.29 | 0.37 | 0.31 | -0.072 | NA |
| chr3 | 121902742 | 121903645 | CASR         | ENSG00000036828 | 12   | 0.31 | 0.26 | 0.31 | 0.048  | NA |
| chr3 | 128879823 | 128880447 | ISY1         | ENSG00000240682 | -264 | 0.37 | 0.26 | 0.31 | 0.1    | NA |
| chr3 | 196158603 | 196159603 | UBXN7        | ENSG00000163960 | 165  | 0.31 | 0.27 | 0.31 | 0.046  | NA |
| chr3 | 42695528  | 42696575  | RP4-613B23.1 | ENSG00000230084 | -233 | 0.25 | 0.2  | 0.32 | 0.054  | NA |
| chr3 | 43327698  | 43328310  | SNRK         | ENSG00000163788 | 0    | 0.17 | 0.13 | 0.32 | 0.043  | NA |
| chr3 | 64008883  | 64009293  | PSMD6        | ENSG00000163636 | 25   | 0.28 | 0.12 | 0.32 | 0.15   | NA |

|      |           |           |               |                 |      |      |      |      |        |    |
|------|-----------|-----------|---------------|-----------------|------|------|------|------|--------|----|
| chr3 | 119012891 | 119013724 | ARHGAP31      | ENSG00000031081 | 87   | 0.31 | 0.23 | 0.32 | 0.085  | NA |
| chr3 | 141943946 | 141944573 | GK5           | ENSG00000175066 | -1   | 0.22 | 0.16 | 0.32 | 0.057  | NA |
| chr3 | 47823467  | 47823824  | SMARCC1       | ENSG00000173473 | -49  | 0.23 | 0.16 | 0.33 | 0.072  | NA |
| chr3 | 49466478  | 49466843  | NICN1         | ENSG00000145029 | 48   | 0.19 | 0.27 | 0.33 | -0.077 | NA |
| chr3 | 49940888  | 49941426  | MST1R         | ENSG00000164078 | -115 | 0.81 | 0.76 | 0.33 | 0.049  | NA |
| chr3 | 49967121  | 49967472  | MON1A         | ENSG00000164077 | -29  | 0.25 | 0.18 | 0.33 | 0.063  | NA |
| chr3 | 59035406  | 59035944  | C3orf67       | ENSG00000163689 | -190 | 0.2  | 0.14 | 0.33 | 0.069  | NA |
| chr3 | 121553820 | 121554236 | IQCB1         | ENSG00000173226 | -189 | 0.28 | 0.21 | 0.33 | 0.065  | NA |
| chr3 | 173113270 | 173113681 | NLGN1         | ENSG00000169760 | -599 | 0.3  | 0.15 | 0.33 | 0.15   | NA |
| chr3 | 179370442 | 179371549 | USP13         | ENSG00000058056 | 452  | 0.29 | 0.24 | 0.33 | 0.047  | NA |
| chr3 | 12705059  | 12705887  | RAF1          | ENSG00000132155 | 143  | 0.28 | 0.23 | 0.34 | 0.05   | NA |
| chr3 | 13919939  | 13922335  | WNT7A         | ENSG00000154764 | 481  | 0.26 | 0.23 | 0.34 | 0.034  | NA |
| chr3 | 14989486  | 14989984  | AC090937.2    | ENSG00000225733 | 196  | 0.25 | 0.41 | 0.34 | -0.16  | NA |
| chr3 | 47891129  | 47891544  | MIR1226       | ENSG00000221585 | 291  | 0.89 | 0.94 | 0.34 | -0.049 | NA |
| chr3 | 182971429 | 182972635 | B3GNT5        | ENSG00000176597 | 449  | 0.3  | 0.25 | 0.34 | 0.043  | NA |
| chr3 | 9932179   | 9932739   | JAGN1         | ENSG00000171135 | 221  | 0.3  | 0.22 | 0.35 | 0.082  | NA |
| chr3 | 48631882  | 48632901  | COL7A1        | ENSG00000114270 | 202  | 0.3  | 0.47 | 0.35 | -0.17  | NA |
| chr3 | 75721294  | 75721909  | RP11-413E6.8  | ENSG00000242516 | 59   | 0.54 | 0.47 | 0.35 | 0.077  | NA |
| chr3 | 108308227 | 108308604 | KIAA1524      | ENSG00000163507 | -137 | 0.29 | 0.17 | 0.35 | 0.12   | NA |
| chr3 | 119812775 | 119814649 | GSK3B         | ENSG00000082701 | -448 | 0.27 | 0.22 | 0.35 | 0.046  | NA |
| chr3 | 155523740 | 155524174 | C3orf33       | ENSG00000174928 | 83   | 0.25 | 0.18 | 0.35 | 0.066  | NA |
| chr3 | 160282505 | 160283874 | KRT8P12       | ENSG00000229320 | -46  | 0.3  | 0.26 | 0.35 | 0.038  | NA |
| chr3 | 167452376 | 167452830 | PDCD10        | ENSG00000114209 | 6    | 0.31 | 0.22 | 0.36 | 0.093  | NA |
| chr3 | 179754520 | 179755245 | PEX5L         | ENSG00000114757 | -324 | 0.24 | 0.18 | 0.36 | 0.057  | NA |
| chr3 | 14988612  | 14989036  | AC090937.2    | ENSG00000225733 | 188  | 0.25 | 0.31 | 0.37 | -0.065 | NA |
| chr3 | 33318818  | 33319309  | FBXL2         | ENSG00000153558 | 149  | 0.21 | 0.25 | 0.37 | -0.04  | NA |
| chr3 | 47866474  | 47866882  | DHX30         | ENSG00000132153 | 160  | 0.26 | 0.2  | 0.37 | 0.065  | NA |
| chr3 | 48722969  | 48723757  | NCKIPSD       | ENSG00000213672 | -95  | 0.23 | 0.2  | 0.37 | 0.036  | NA |
| chr3 | 49977367  | 49978196  | RBM6          | ENSG00000004534 | 341  | 0.19 | 0.23 | 0.37 | -0.044 | NA |
| chr3 | 113603863 | 113604246 | RP11-435F17.3 | ENSG00000241889 | -91  | 1    | 0.92 | 0.37 | 0.082  | NA |

|      |           |           |               |                 |       |      |      |      |        |    |
|------|-----------|-----------|---------------|-----------------|-------|------|------|------|--------|----|
| chr3 | 114069725 | 114070658 | RP11-364F11.1 | ENSG00000241560 | -467  | 0.97 | 0.99 | 0.37 | -0.016 | NA |
| chr3 | 127391011 | 127392434 | ABTB1         | ENSG00000114626 | -56   | 0.2  | 0.17 | 0.37 | 0.027  | NA |
| chr3 | 168864030 | 168864449 | MECOM         | ENSG00000085276 | -163  | 0.35 | 0.23 | 0.37 | 0.12   | NA |
| chr3 | 184045016 | 184045236 | EIF4G1        | ENSG00000114867 | 52    | 0.95 | 0.84 | 0.37 | 0.11   | NA |
| chr3 | 196668695 | 196670054 | NCBP2         | ENSG00000114503 | -647  | 0.19 | 0.15 | 0.37 | 0.042  | NA |
| chr3 | 37493418  | 37494538  | ITGA9         | ENSG00000144668 | 372   | 0.19 | 0.16 | 0.38 | 0.033  | NA |
| chr3 | 48646620  | 48647404  | UQCRC1        | ENSG00000010256 | 47    | 0.26 | 0.32 | 0.38 | -0.059 | NA |
| chr3 | 3168324   | 3169231   | TRNT1         | ENSG00000072756 | 177   | 0.22 | 0.19 | 0.39 | 0.029  | NA |
| chr3 | 49726686  | 49727340  | MST1          | ENSG00000173531 | -87   | 0.19 | 0.24 | 0.39 | -0.046 | NA |
| chr3 | 49760863  | 49761895  | AMIGO3        | ENSG00000176020 | -30   | 0.22 | 0.15 | 0.39 | 0.066  | NA |
| chr3 | 53915731  | 53916320  | ACTR8         | ENSG00000113812 | -174  | 0.24 | 0.19 | 0.39 | 0.053  | NA |
| chr3 | 58223101  | 58224364  | ABHD6         | ENSG00000163686 | 499   | 0.23 | 0.26 | 0.39 | -0.033 | NA |
| chr3 | 115377267 | 115377787 | RP11-326J18.1 | ENSG00000241596 | 147   | 0.29 | 0.18 | 0.39 | 0.12   | NA |
| chr3 | 122102851 | 122103198 | FAM162A       | ENSG00000114023 | 1     | 0.22 | 0.14 | 0.39 | 0.072  | NA |
| chr3 | 122283002 | 122283594 | DTX3L         | ENSG00000163840 | 213   | 0.25 | 0.3  | 0.39 | -0.051 | NA |
| chr3 | 137893410 | 137893808 | DBR1          | ENSG00000138231 | 92    | 0.23 | 0.17 | 0.39 | 0.062  | NA |
| chr3 | 147115764 | 147116421 | ZIC4          | ENSG00000174963 | -1119 | 0.18 | 0.24 | 0.39 | -0.062 | NA |
| chr3 | 169684394 | 169685006 | SEC62         | ENSG00000008952 | 277   | 0.2  | 0.13 | 0.39 | 0.071  | NA |
| chr3 | 182816771 | 182817455 | MCCC1         | ENSG00000078070 | -82   | 0.19 | 0.24 | 0.39 | -0.046 | NA |
| chr3 | 9404683   | 9404938   | RP11-380O24.1 | ENSG00000254485 | -120  | 0.4  | 0.22 | 0.4  | 0.18   | NA |
| chr3 | 77088498  | 77089198  | ROBO2         | ENSG00000185008 | -189  | 0.18 | 0.24 | 0.4  | -0.059 | NA |
| chr3 | 128368929 | 128369805 | RPN1          | ENSG00000163902 | 292   | 0.28 | 0.23 | 0.4  | 0.054  | NA |
| chr3 | 186544916 | 186545471 | RP11-573D15.1 | ENSG00000231982 | 855   | 0.2  | 0.15 | 0.4  | 0.055  | NA |
| chr3 | 48672406  | 48673160  | SLC26A6       | ENSG00000225697 | 91    | 0.27 | 0.32 | 0.41 | -0.049 | NA |
| chr3 | 49157768  | 49158463  | USP19         | ENSG00000172046 | -14   | 0.21 | 0.16 | 0.41 | 0.046  | NA |
| chr3 | 127347682 | 127348859 | PODXL2        | ENSG00000114631 | 246   | 0.21 | 0.18 | 0.41 | 0.034  | NA |
| chr3 | 134204520 | 134205439 | ANAPC13       | ENSG00000129055 | -434  | 0.19 | 0.15 | 0.41 | 0.044  | NA |
| chr3 | 197463335 | 197464144 | KIAA0226      | ENSG00000145016 | -149  | 0.25 | 0.21 | 0.41 | 0.039  | NA |
| chr3 | 5228958   | 5230190   | AC026202.3    | ENSG00000233912 | -560  | 0.22 | 0.19 | 0.42 | 0.025  | NA |
| chr3 | 23986693  | 23988021  | NR1D2         | ENSG00000174738 | 606   | 0.19 | 0.22 | 0.42 | -0.024 | NA |

|      |           |           |               |                 |       |      |      |      |        |    |
|------|-----------|-----------|---------------|-----------------|-------|------|------|------|--------|----|
| chr3 | 47822921  | 47823194  | SMARCC1       | ENSG00000173473 | 314   | 0.19 | 0.25 | 0.42 | -0.068 | NA |
| chr3 | 49710968  | 49712279  | APEH          | ENSG00000164062 | 188   | 0.19 | 0.16 | 0.42 | 0.027  | NA |
| chr3 | 123679785 | 123680481 | CCDC14        | ENSG00000175455 | -78   | 0.15 | 0.19 | 0.42 | -0.04  | NA |
| chr3 | 142442702 | 142443978 | TRPC1         | ENSG00000144935 | 424   | 0.34 | 0.26 | 0.42 | 0.077  | NA |
| chr3 | 183542496 | 183543804 | MAP6D1        | ENSG00000180834 | -137  | 0.23 | 0.2  | 0.42 | 0.027  | NA |
| chr3 | 25824336  | 25825456  | NGLY1         | ENSG00000151092 | -533  | 0.22 | 0.19 | 0.43 | 0.035  | NA |
| chr3 | 48884503  | 48885406  | RP11-316M24.1 | ENSG00000224424 | -51   | 0.15 | 0.17 | 0.43 | -0.029 | NA |
| chr3 | 52029757  | 52030058  | RPL29         | ENSG00000162244 | -77   | 0.18 | 0.23 | 0.43 | -0.047 | NA |
| chr3 | 56590939  | 56591223  | CCDC66        | ENSG00000180376 | -108  | 0.18 | 0.24 | 0.43 | -0.059 | NA |
| chr3 | 62859617  | 62861190  | CADPS         | ENSG00000163618 | 301   | 0.2  | 0.18 | 0.43 | 0.022  | NA |
| chr3 | 73673230  | 73674375  | PDZRN3        | ENSG00000121440 | 189   | 0.25 | 0.21 | 0.43 | 0.038  | NA |
| chr3 | 23244050  | 23245071  | AC135966.1    | ENSG00000233153 | -491  | 0.19 | 0.17 | 0.44 | 0.025  | NA |
| chr3 | 113557568 | 113557800 | GRAMD1C       | ENSG00000178075 | 19    | 0.19 | 0.11 | 0.44 | 0.077  | NA |
| chr3 | 137906035 | 137906861 | ARMC8         | ENSG00000114098 | 339   | 0.26 | 0.22 | 0.44 | 0.041  | NA |
| chr3 | 163722050 | 163722295 | RP11-208P4.1  | ENSG00000214210 | -1919 | 1    | 0.95 | 0.44 | 0.049  | NA |
| chr3 | 27674209  | 27674639  | AC098614.2    | ENSG00000213846 | -43   | 0.2  | 0.36 | 0.45 | -0.17  | NA |
| chr3 | 61236606  | 61237227  | FHIT          | ENSG00000189283 | 142   | 0.23 | 0.27 | 0.45 | -0.045 | NA |
| chr3 | 133524568 | 133525199 | SRPRB         | ENSG00000144867 | 424   | 0.17 | 0.25 | 0.45 | -0.075 | NA |
| chr3 | 9956822   | 9957664   | IL17RC        | ENSG00000163702 | -1515 | 0.26 | 0.2  | 0.46 | 0.068  | NA |
| chr3 | 16306136  | 16306986  | DPH3          | ENSG00000154813 | -277  | 0.24 | 0.33 | 0.46 | -0.097 | NA |
| chr3 | 42947480  | 42948170  | ZNF662        | ENSG00000182983 | 167   | 0.19 | 0.22 | 0.46 | -0.031 | NA |
| chr3 | 45883221  | 45883860  | LZTFL1        | ENSG00000163818 | -188  | 0.22 | 0.16 | 0.46 | 0.063  | NA |
| chr3 | 133748401 | 133748966 | SLCO2A1       | ENSG00000174640 | 75    | 0.32 | 0.25 | 0.46 | 0.064  | NA |
| chr3 | 134514085 | 134515980 | EPHB1         | ENSG00000154928 | 928   | 0.23 | 0.21 | 0.46 | 0.028  | NA |
| chr3 | 183735183 | 183736103 | ABCC5         | ENSG00000114770 | -411  | 0.23 | 0.16 | 0.46 | 0.071  | NA |
| chr3 | 49203285  | 49203820  | CCDC71        | ENSG00000177352 | 202   | 0.31 | 0.26 | 0.47 | 0.047  | NA |
| chr3 | 12882534  | 12883073  | RPL32         | ENSG00000144713 | 225   | 0.17 | 0.33 | 0.48 | -0.17  | NA |
| chr3 | 15140035  | 15140890  | ZFYVE20       | ENSG00000131381 | 162   | 0.39 | 0.29 | 0.48 | 0.092  | NA |
| chr3 | 40350857  | 40351832  | EIF1B         | ENSG00000114784 | 169   | 0.23 | 0.27 | 0.48 | -0.041 | NA |
| chr3 | 47422082  | 47423179  | PTPN23        | ENSG00000076201 | 129   | 0.26 | 0.23 | 0.48 | 0.033  | NA |

|      |           |           |               |                 |      |      |      |      |        |    |
|------|-----------|-----------|---------------|-----------------|------|------|------|------|--------|----|
| chr3 | 50387959  | 50388681  | CYB561D2      | ENSG00000114395 | 194  | 0.29 | 0.26 | 0.48 | 0.035  | NA |
| chr3 | 132379083 | 132379643 | UBA5          | ENSG00000081307 | 209  | 0.38 | 0.3  | 0.48 | 0.073  | NA |
| chr3 | 139653430 | 139655115 | CLSTN2        | ENSG00000158258 | 245  | 0.23 | 0.2  | 0.48 | 0.027  | NA |
| chr3 | 185655056 | 185656029 | TRA2B         | ENSG00000136527 | -334 | 0.18 | 0.12 | 0.48 | 0.059  | NA |
| chr3 | 44690126  | 44690587  | ZNF35         | ENSG00000169981 | 137  | 0.33 | 0.25 | 0.49 | 0.081  | NA |
| chr3 | 50310445  | 50311397  | SEMA3B        | ENSG0000012171  | 371  | 0.33 | 0.35 | 0.49 | -0.025 | NA |
| chr3 | 75955759  | 75956308  | ROBO2         | ENSG00000185008 | 187  | 0.21 | 0.28 | 0.49 | -0.065 | NA |
| chr3 | 195595722 | 195595973 | TNK2          | ENSG00000061938 | 714  | 0.95 | 0.88 | 0.49 | 0.073  | NA |
| chr3 | 27410612  | 27411066  | NEK10         | ENSG00000163491 | -152 | 0.19 | 0.15 | 0.5  | 0.038  | NA |
| chr3 | 45729700  | 45730033  | RP11-697K23.1 | ENSG00000230530 | 508  | 0.25 | 0.4  | 0.5  | -0.15  | NA |
| chr3 | 101405309 | 101405688 | RPL24         | ENSG00000114391 | 41   | 0.14 | 0.4  | 0.5  | -0.26  | NA |
| chr3 | 142720236 | 142720759 | U2SURP        | ENSG00000163714 | 131  | 0.18 | 0.21 | 0.5  | -0.027 | NA |
| chr3 | 186284809 | 186285329 | TBCCD1        | ENSG00000113838 | 72   | 0.24 | 0.2  | 0.5  | 0.037  | NA |
| chr3 | 40498639  | 40499260  | RPL14         | ENSG00000188846 | 166  | 0.33 | 0.27 | 0.51 | 0.052  | NA |
| chr3 | 45730615  | 45731294  | RP11-697K23.1 | ENSG00000230530 | -328 | 0.24 | 0.28 | 0.51 | -0.038 | NA |
| chr3 | 52091279  | 52091652  | DUSP7         | ENSG00000164086 | -899 | 0.67 | 1    | 0.51 | -0.33  | NA |
| chr3 | 107149820 | 107150910 | AC068765.1    | ENSG00000245070 | 588  | 0.19 | 0.22 | 0.51 | -0.024 | NA |
| chr3 | 122399655 | 122400190 | PARP14        | ENSG00000173193 | 250  | 0.32 | 0.28 | 0.51 | 0.045  | NA |
| chr3 | 118959339 | 118959934 | B4GALT4       | ENSG00000121578 | -150 | 0.18 | 0.22 | 0.52 | -0.041 | NA |
| chr3 | 129982745 | 129983090 | COL6A4P2      | ENSG00000228252 | -368 | 0.99 | 0.96 | 0.52 | 0.024  | NA |
| chr3 | 133380458 | 133380989 | TOPBP1        | ENSG00000163781 | 14   | 0.25 | 0.21 | 0.52 | 0.035  | NA |
| chr3 | 238391    | 240140    | CHL1          | ENSG00000134121 | 811  | 0.26 | 0.24 | 0.53 | 0.02   | NA |
| chr3 | 28282826  | 28283457  | CMC1          | ENSG00000187118 | 66   | 0.24 | 0.19 | 0.53 | 0.048  | NA |
| chr3 | 41240162  | 41241631  | CTNNB1        | ENSG00000168036 | -29  | 0.24 | 0.21 | 0.53 | 0.022  | NA |
| chr3 | 129323915 | 129325332 | PLXND1        | ENSG00000004399 | 1038 | 0.22 | 0.24 | 0.53 | -0.02  | NA |
| chr3 | 184032166 | 184033242 | EIF4G1        | ENSG00000114867 | 421  | 0.22 | 0.19 | 0.53 | 0.029  | NA |
| chr3 | 30647987  | 30648881  | TGFBR2        | ENSG00000163513 | 440  | 0.25 | 0.29 | 0.54 | -0.041 | NA |
| chr3 | 51740740  | 51741413  | GRM2          | ENSG00000164082 | -10  | 0.25 | 0.2  | 0.54 | 0.046  | NA |
| chr3 | 51975612  | 51976505  | RRP9          | ENSG00000114767 | -101 | 0.27 | 0.24 | 0.54 | 0.03   | NA |
| chr3 | 128839934 | 128840633 | RAB43         | ENSG00000172780 | 341  | 0.29 | 0.24 | 0.54 | 0.046  | NA |

|      |           |           |              |                 |      |      |      |      |        |    |
|------|-----------|-----------|--------------|-----------------|------|------|------|------|--------|----|
| chr3 | 156008991 | 156009320 | KCNAB1       | ENSG00000169282 | 329  | 0.16 | 0.21 | 0.54 | -0.045 | NA |
| chr3 | 197354106 | 197355165 | AC024560.3   | ENSG00000214135 | 78   | 0.21 | 0.25 | 0.54 | -0.042 | NA |
| chr3 | 50263685  | 50263908  | GNAI2        | ENSG00000114353 | 72   | 0.29 | 0.24 | 0.55 | 0.042  | NA |
| chr3 | 156806688 | 156807069 | RP11-6F2.6   | ENSG00000241135 | -792 | 0.37 | 0.5  | 0.55 | -0.13  | NA |
| chr3 | 183947040 | 183948801 | VWA5B2       | ENSG00000145198 | -297 | 0.21 | 0.23 | 0.55 | -0.017 | NA |
| chr3 | 195771456 | 195771713 | AC024937.2   | ENSG00000228413 | 18   | 0.98 | 0.93 | 0.56 | 0.049  | NA |
| chr3 | 26664104  | 26664796  | AC099754.1   | ENSG00000225386 | -269 | 0.17 | 0.21 | 0.57 | -0.041 | NA |
| chr3 | 46742764  | 46743086  | TMIE         | ENSG00000181585 | 102  | 0.17 | 0.21 | 0.57 | -0.046 | NA |
| chr3 | 49840103  | 49841191  | C3orf54      | ENSG00000185614 | -40  | 0.21 | 0.24 | 0.57 | -0.032 | NA |
| chr3 | 123987726 | 123987946 | KALRN        | ENSG00000160145 | 398  | 0.98 | 1    | 0.57 | -0.023 | NA |
| chr3 | 147126988 | 147128999 | ZIC1         | ENSG00000152977 | 822  | 0.19 | 0.18 | 0.57 | 0.014  | NA |
| chr3 | 149530293 | 149531234 | RNF13        | ENSG00000082996 | 268  | 0.18 | 0.23 | 0.57 | -0.053 | NA |
| chr3 | 195808278 | 195809219 | TFRC         | ENSG00000072274 | 213  | 0.2  | 0.18 | 0.57 | 0.023  | NA |
| chr3 | 9437945   | 9439760   | RP11-58B17.1 | ENSG00000206573 | -563 | 0.23 | 0.22 | 0.58 | 0.019  | NA |
| chr3 | 42700092  | 42700355  | ZBTB47       | ENSG00000114853 | -83  | 0.93 | 0.8  | 0.58 | 0.13   | NA |
| chr3 | 69129058  | 69129515  | UBA3         | ENSG00000144744 | 219  | 0.2  | 0.17 | 0.58 | 0.029  | NA |
| chr3 | 129693127 | 129694841 | TRH          | ENSG00000170893 | 836  | 0.31 | 0.29 | 0.59 | 0.025  | NA |
| chr3 | 174158595 | 174159348 | NAALADL2     | ENSG00000177694 | 236  | 0.23 | 0.21 | 0.59 | 0.025  | NA |
| chr3 | 71114334  | 71114821  | FOXP1        | ENSG00000114861 | 341  | 0.36 | 0.3  | 0.6  | 0.059  | NA |
| chr3 | 119395989 | 119396387 | COX17        | ENSG00000138495 | -47  | 0.38 | 0.27 | 0.6  | 0.11   | NA |
| chr3 | 126422888 | 126423609 | CHCHD6       | ENSG00000159685 | 185  | 0.22 | 0.19 | 0.6  | 0.033  | NA |
| chr3 | 50329399  | 50330116  | IFRD2        | ENSG00000214706 | -277 | 0.2  | 0.23 | 0.61 | -0.033 | NA |
| chr3 | 66023373  | 66025595  | MAGI1        | ENSG00000151276 | -501 | 0.23 | 0.21 | 0.61 | 0.017  | NA |
| chr3 | 68056899  | 68057167  | FAM19A1      | ENSG00000183662 | 1660 | 0.25 | 0.16 | 0.61 | 0.089  | NA |
| chr3 | 112051893 | 112052406 | CD200        | ENSG00000091972 | 234  | 0.26 | 0.23 | 0.61 | 0.036  | NA |
| chr3 | 149687877 | 149689537 | PFN2         | ENSG00000070087 | -519 | 0.28 | 0.26 | 0.61 | 0.018  | NA |
| chr3 | 184529812 | 184530255 | VPS8         | ENSG00000156931 | 102  | 0.26 | 0.37 | 0.61 | -0.11  | NA |
| chr3 | 128598176 | 128598703 | ACAD9        | ENSG00000177646 | 0    | 0.23 | 0.36 | 0.62 | -0.13  | NA |
| chr3 | 176915511 | 176915854 | TBL1XR1      | ENSG00000177565 | -421 | 0.23 | 0.17 | 0.62 | 0.055  | NA |
| chr3 | 39424696  | 39426058  | SLC25A38     | ENSG00000144659 | 538  | 0.2  | 0.21 | 0.63 | -0.018 | NA |



|      |           |           |              |                 |      |      |      |      |        |    |
|------|-----------|-----------|--------------|-----------------|------|------|------|------|--------|----|
| chr3 | 49906737  | 49907482  | CAMKV        | ENSG00000164076 | 227  | 0.22 | 0.2  | 0.63 | 0.028  | NA |
| chr3 | 51430384  | 51430737  | RBM15B       | ENSG00000179837 | 404  | 0.92 | 0.95 | 0.63 | -0.033 | NA |
| chr3 | 56502611  | 56502815  | ERC2         | ENSG00000187672 | -322 | 0.18 | 0.15 | 0.63 | 0.026  | NA |
| chr3 | 101231610 | 101232173 | SENP7        | ENSG00000138468 | 137  | 0.19 | 0.24 | 0.63 | -0.05  | NA |
| chr3 | 127633993 | 127634588 | KBTBD12      | ENSG00000187715 | 215  | 0.33 | 0.27 | 0.63 | 0.057  | NA |
| chr3 | 197281605 | 197283128 | BDH1         | ENSG00000161267 | 181  | 0.31 | 0.29 | 0.63 | 0.019  | NA |
| chr3 | 10290888  | 10291111  | TATDN2       | ENSG00000157014 | -57  | 0.12 | 0.2  | 0.64 | -0.075 | NA |
| chr3 | 40494414  | 40494899  | RP11-391M1.3 | ENSG00000223797 | 15   | 0.28 | 0.22 | 0.64 | 0.059  | NA |
| chr3 | 93692554  | 93692783  | PROS1        | ENSG00000184500 | 38   | 0.15 | 0.28 | 0.64 | -0.13  | NA |
| chr3 | 111804865 | 111805570 | C3orf52      | ENSG00000114529 | 35   | 0.24 | 0.26 | 0.64 | -0.025 | NA |
| chr3 | 119298284 | 119298983 | ADPRH        | ENSG00000144843 | 322  | 0.15 | 0.18 | 0.64 | -0.028 | NA |
| chr3 | 150263609 | 150264607 | SERP1        | ENSG00000120742 | 178  | 0.33 | 0.31 | 0.64 | 0.028  | NA |
| chr3 | 188665275 | 188665552 | RP11-297K7.2 | ENSG00000234076 | 15   | 0.3  | 0.24 | 0.65 | 0.063  | NA |
| chr3 | 9851476   | 9852171   | TTLL3        | ENSG00000214021 | 265  | 0.27 | 0.24 | 0.66 | 0.028  | NA |
| chr3 | 17783646  | 17784455  | TBC1D5       | ENSG00000131374 | -60  | 0.18 | 0.16 | 0.66 | 0.025  | NA |
| chr3 | 38537682  | 38538071  | EXOG         | ENSG00000157036 | 113  | 0.18 | 0.2  | 0.66 | -0.024 | NA |
| chr3 | 49591578  | 49592534  | RP11-949J7.7 | ENSG00000226913 | -283 | 0.26 | 0.3  | 0.66 | -0.04  | NA |
| chr3 | 50654276  | 50655120  | MAPKAPK3     | ENSG00000114738 | 136  | 0.26 | 0.29 | 0.66 | -0.028 | NA |
| chr3 | 68980783  | 68982035  | FAM19A4      | ENSG00000163377 | 310  | 0.3  | 0.27 | 0.66 | 0.03   | NA |
| chr3 | 129611920 | 129612884 | TMCC1        | ENSG00000172765 | -238 | 0.32 | 0.36 | 0.66 | -0.044 | NA |
| chr3 | 192958709 | 192959373 | HRASLS       | ENSG00000127252 | 127  | 0.2  | 0.17 | 0.66 | 0.028  | NA |
| chr3 | 65364942  | 65365261  | MAGI1        | ENSG00000151276 | 1405 | 0.96 | 1    | 0.67 | -0.038 | NA |
| chr3 | 9642387   | 9642695   | AC026194.2   | ENSG00000235338 | 109  | 0.35 | 0.3  | 0.68 | 0.052  | NA |
| chr3 | 15900497  | 15901990  | ANKRD28      | ENSG00000206560 | -314 | 0.21 | 0.2  | 0.68 | 0.015  | NA |
| chr3 | 160822494 | 160823260 | NMD3         | ENSG00000169251 | 267  | 0.24 | 0.21 | 0.68 | 0.026  | NA |
| chr3 | 16646404  | 16647131  | DAZL         | ENSG00000092345 | 239  | 0.99 | 0.98 | 0.69 | 0.01   | NA |
| chr3 | 32611700  | 32612763  | DYNC1LI1     | ENSG00000144635 | -486 | 0.28 | 0.26 | 0.69 | 0.021  | NA |
| chr3 | 38179857  | 38180689  | MYD88        | ENSG00000172936 | 304  | 0.23 | 0.26 | 0.69 | -0.027 | NA |
| chr3 | 39093469  | 39094025  | WDR48        | ENSG00000114742 | 258  | 0.27 | 0.25 | 0.69 | 0.026  | NA |
| chr3 | 47887825  | 47888150  | DHX30        | ENSG00000132153 | 995  | 0.92 | 0.94 | 0.69 | -0.025 | NA |

|      |           |           |               |                 |      |      |      |      |        |    |
|------|-----------|-----------|---------------|-----------------|------|------|------|------|--------|----|
| chr3 | 48936041  | 48936457  | SLC25A20      | ENSG00000178537 | 76   | 0.14 | 0.11 | 0.69 | 0.032  | NA |
| chr3 | 49208629  | 49209196  | KLHDC8B       | ENSG00000185909 | -132 | 0.35 | 0.45 | 0.69 | -0.098 | NA |
| chr3 | 132440713 | 132441213 | NPHP3         | ENSG00000113971 | -112 | 0.23 | 0.26 | 0.69 | -0.031 | NA |
| chr3 | 133747920 | 133748266 | SLCO2A1       | ENSG00000174640 | 665  | 0.23 | 0.5  | 0.69 | -0.27  | NA |
| chr3 | 183993905 | 183994347 | ECE2          | ENSG00000145194 | 184  | 0.2  | 0.15 | 0.69 | 0.048  | NA |
| chr3 | 42002932  | 42003728  | ULK4          | ENSG00000168038 | 156  | 0.25 | 0.3  | 0.7  | -0.056 | NA |
| chr3 | 50365306  | 50365885  | TUSC2         | ENSG00000114383 | -7   | 0.33 | 0.25 | 0.7  | 0.083  | NA |
| chr3 | 12598391  | 12599051  | MKRN2         | ENSG00000075975 | 208  | 0.36 | 0.32 | 0.71 | 0.034  | NA |
| chr3 | 33480998  | 33482139  | UBP1          | ENSG00000153560 | -66  | 0.22 | 0.2  | 0.71 | 0.014  | NA |
| chr3 | 67048455  | 67049273  | KBTBD8        | ENSG00000163376 | 137  | 0.25 | 0.27 | 0.71 | -0.02  | NA |
| chr3 | 112709666 | 112710270 | GTPBP8        | ENSG00000163607 | 203  | 0.22 | 0.25 | 0.71 | -0.025 | NA |
| chr3 | 121468092 | 121468578 | GOLGB1        | ENSG00000173230 | 178  | 0.2  | 0.17 | 0.71 | 0.037  | NA |
| chr3 | 169482338 | 169483052 | TERC          | ENSG00000200182 | 140  | 0.26 | 0.3  | 0.71 | -0.04  | NA |
| chr3 | 10157129  | 10157612  | C3orf10       | ENSG00000254999 | 94   | 0.23 | 0.19 | 0.72 | 0.036  | NA |
| chr3 | 19988333  | 19989321  | EFHB          | ENSG00000163576 | -326 | 0.34 | 0.29 | 0.72 | 0.058  | NA |
| chr3 | 52804559  | 52805128  | NEK4          | ENSG00000114904 | 29   | 0.26 | 0.21 | 0.72 | 0.046  | NA |
| chr3 | 146187108 | 146187710 | PLSCR2        | ENSG00000163746 | -321 | 0.2  | 0.24 | 0.72 | -0.041 | NA |
| chr3 | 184053565 | 184054263 | FAM131A       | ENSG00000175182 | 200  | 0.21 | 0.18 | 0.72 | 0.03   | NA |
| chr3 | 49507384  | 49508290  | DAG1          | ENSG00000173402 | 272  | 0.16 | 0.15 | 0.73 | 0.011  | NA |
| chr3 | 54660189  | 54660638  | RP11-554O1.1  | ENSG00000229806 | 171  | 0.97 | 0.96 | 0.73 | 0.016  | NA |
| chr3 | 130465478 | 130465700 | PIK3R4        | ENSG00000196455 | 84   | 0.23 | 0.19 | 0.73 | 0.036  | NA |
| chr3 | 196366394 | 196366919 | LRRC33        | ENSG00000174004 | 99   | 0.29 | 0.26 | 0.73 | 0.03   | NA |
| chr3 | 6904133   | 6904641   | GRM7          | ENSG00000196277 | -43  | 0.2  | 0.23 | 0.74 | -0.027 | NA |
| chr3 | 101568107 | 101569046 | NFKBIZ        | ENSG00000144802 | 218  | 0.26 | 0.25 | 0.74 | 0.019  | NA |
| chr3 | 125898662 | 125899568 | ALDH1L1       | ENSG00000144908 | -353 | 0.28 | 0.26 | 0.74 | 0.019  | NA |
| chr3 | 193921881 | 193922407 | RP11-513G11.4 | ENSG00000225742 | 1952 | 0.23 | 0.2  | 0.75 | 0.025  | NA |
| chr3 | 197517983 | 197518782 | LRCH3         | ENSG00000186001 | 285  | 0.25 | 0.27 | 0.75 | -0.02  | NA |
| chr3 | 44754099  | 44754399  | ZNF502        | ENSG00000196653 | 114  | 0.19 | 0.22 | 0.76 | -0.03  | NA |
| chr3 | 50273268  | 50273901  | GNAI2         | ENSG00000114353 | 200  | 0.28 | 0.26 | 0.76 | 0.025  | NA |
| chr3 | 52931279  | 52931840  | TMEM110       | ENSG00000213533 | 0    | 0.37 | 0.34 | 0.76 | 0.033  | NA |

|      |           |           |               |                 |      |      |      |      |        |    |
|------|-----------|-----------|---------------|-----------------|------|------|------|------|--------|----|
| chr3 | 72896940  | 72897793  | SHQ1          | ENSG00000144736 | 200  | 0.23 | 0.18 | 0.76 | 0.048  | NA |
| chr3 | 127323457 | 127324038 | MCM2          | ENSG00000073111 | 8    | 0.99 | 0.96 | 0.76 | 0.025  | NA |
| chr3 | 191046948 | 191047710 | UTS2D         | ENSG00000188958 | -228 | 0.22 | 0.2  | 0.76 | 0.022  | NA |
| chr3 | 12045652  | 12046627  | SYN2          | ENSG00000157152 | 277  | 0.21 | 0.26 | 0.77 | -0.051 | NA |
| chr3 | 13520912  | 13521319  | HDAC11        | ENSG00000163517 | -109 | 0.25 | 0.32 | 0.77 | -0.062 | NA |
| chr3 | 53289533  | 53290213  | TKT           | ENSG00000163931 | 117  | 0.15 | 0.17 | 0.77 | -0.018 | NA |
| chr3 | 37901938  | 37904039  | AC093415.2    | ENSG00000235257 | 223  | 0.26 | 0.25 | 0.78 | 0.013  | NA |
| chr3 | 49055214  | 49056317  | DALRD3        | ENSG00000178149 | -311 | 0.19 | 0.21 | 0.78 | -0.013 | NA |
| chr3 | 49723143  | 49724618  | MST1          | ENSG00000173531 | -662 | 0.54 | 0.52 | 0.78 | 0.019  | NA |
| chr3 | 38070394  | 38071598  | PLCD1         | ENSG00000187091 | 54   | 0.2  | 0.22 | 0.79 | -0.012 | NA |
| chr3 | 45837480  | 45838256  | SLC6A20       | ENSG00000163817 | -16  | 0.2  | 0.19 | 0.79 | 0.012  | NA |
| chr3 | 69101221  | 69101664  | TMF1          | ENSG00000144747 | -1   | 0.16 | 0.17 | 0.79 | -0.017 | NA |
| chr3 | 81810315  | 81810953  | GBE1          | ENSG00000114480 | 174  | 0.25 | 0.27 | 0.79 | -0.021 | NA |
| chr3 | 100428069 | 100428669 | TFG           | ENSG00000114354 | 164  | 0.23 | 0.27 | 0.79 | -0.035 | NA |
| chr3 | 123602588 | 123603540 | MYLK          | ENSG00000065534 | 85   | 0.27 | 0.25 | 0.79 | 0.024  | NA |
| chr3 | 42641844  | 42642605  | SEC22C        | ENSG00000093183 | -208 | 0.16 | 0.15 | 0.8  | 0.012  | NA |
| chr3 | 53190509  | 53190764  | PRKCD         | ENSG00000163932 | 611  | 0.15 | 0.17 | 0.8  | -0.018 | NA |
| chr3 | 55515152  | 55515613  | WNT5A         | ENSG00000114251 | -158 | 0.4  | 0.6  | 0.8  | -0.2   | NA |
| chr3 | 43020702  | 43021354  | FAM198A       | ENSG00000144649 | 269  | 0.17 | 0.16 | 0.81 | 0.011  | NA |
| chr3 | 87138225  | 87138546  | AC107204.1    | ENSG00000232092 | -45  | 0.21 | 0.19 | 0.81 | 0.023  | NA |
| chr3 | 126373571 | 126374142 | TXNRD3        | ENSG00000197763 | 88   | 0.19 | 0.21 | 0.81 | -0.023 | NA |
| chr3 | 158288800 | 158289271 | RP11-538P18.2 | ENSG00000243150 | -180 | 0.29 | 0.34 | 0.81 | -0.048 | NA |
| chr3 | 35680509  | 35681628  | ARPP21        | ENSG00000172995 | -13  | 0.18 | 0.2  | 0.82 | -0.018 | NA |
| chr3 | 184104308 | 184104519 | CHRD          | ENSG00000090539 | 1837 | 0.82 | 0.8  | 0.82 | 0.026  | NA |
| chr3 | 8543201   | 8543579   | AC087859.1    | ENSG00000227110 | -106 | 0.2  | 0.17 | 0.83 | 0.033  | NA |
| chr3 | 43147184  | 43147713  | C3orf39       | ENSG00000144647 | -17  | 0.19 | 0.23 | 0.83 | -0.033 | NA |
| chr3 | 49141934  | 49142373  | QARS          | ENSG00000172053 | -209 | 0.21 | 0.19 | 0.83 | 0.027  | NA |
| chr3 | 87275872  | 87276842  | CHMP2B        | ENSG00000083937 | -64  | 0.33 | 0.31 | 0.83 | 0.02   | NA |
| chr3 | 11529784  | 11530120  | AC026185.1    | ENSG00000235240 | -5   | 1    | 0.99 | 0.84 | 0.011  | NA |
| chr3 | 50396347  | 50397175  | TMEM115       | ENSG00000126062 | 280  | 0.29 | 0.31 | 0.84 | -0.021 | NA |

|      |           |           |               |                 |      |      |      |      |         |    |
|------|-----------|-----------|---------------|-----------------|------|------|------|------|---------|----|
| chr3 | 62304514  | 62304780  | RP11-204J18.3 | ENSG00000241472 | -80  | 0.17 | 0.33 | 0.84 | -0.17   | NA |
| chr3 | 125802447 | 125803258 | SLC41A3       | ENSG00000114544 | -87  | 0.33 | 0.31 | 0.84 | 0.027   | NA |
| chr3 | 128444900 | 128445650 | RAB7A         | ENSG00000075785 | 310  | 0.28 | 0.31 | 0.84 | -0.034  | NA |
| chr3 | 169490834 | 169491206 | MYNN          | ENSG00000085274 | 167  | 0.31 | 0.35 | 0.84 | -0.034  | NA |
| chr3 | 185825462 | 185827003 | ETV5          | ENSG00000244405 | 101  | 0.24 | 0.25 | 0.84 | -0.01   | NA |
| chr3 | 194353761 | 194354490 | TMEM44        | ENSG00000145014 | -115 | 0.27 | 0.3  | 0.84 | -0.036  | NA |
| chr3 | 195564747 | 195565017 | AC124944.5    | ENSG00000223783 | -966 | 1    | 0.97 | 0.84 | 0.031   | NA |
| chr3 | 4508608   | 4508964   | SUMF1         | ENSG00000144455 | 143  | 0.28 | 0.24 | 0.85 | 0.043   | NA |
| chr3 | 10206449  | 10207024  | IRAK2         | ENSG00000134070 | 187  | 0.16 | 0.17 | 0.85 | -0.01   | NA |
| chr3 | 44802852  | 44803618  | KIAA1143      | ENSG00000163807 | -232 | 0.36 | 0.39 | 0.85 | -0.023  | NA |
| chr3 | 57741925  | 57742990  | SLMAP         | ENSG00000163681 | 500  | 0.17 | 0.16 | 0.85 | 0.011   | NA |
| chr3 | 130612285 | 130613485 | ATP2C1        | ENSG00000017260 | 73   | 0.2  | 0.18 | 0.85 | 0.025   | NA |
| chr3 | 138553159 | 138554078 | PIK3CB        | ENSG00000051382 | -24  | 0.23 | 0.24 | 0.85 | -0.011  | NA |
| chr3 | 197025852 | 197026105 | DLG1          | ENSG00000075711 | 193  | 0.24 | 0.22 | 0.85 | 0.023   | NA |
| chr3 | 108836795 | 108837089 | MORC1         | ENSG00000114487 | 8    | 0.99 | 0.97 | 0.86 | 0.015   | NA |
| chr3 | 171757493 | 171758724 | FNDC3B        | ENSG00000075420 | -236 | 0.25 | 0.24 | 0.86 | 0.011   | NA |
| chr3 | 9773066   | 9773911   | BRPF1         | ENSG00000156983 | 75   | 0.35 | 0.33 | 0.87 | 0.023   | NA |
| chr3 | 32147826  | 32148874  | GPD1L         | ENSG00000152642 | 347  | 0.19 | 0.2  | 0.87 | -0.012  | NA |
| chr3 | 40547391  | 40547628  | ZNF620        | ENSG00000177842 | 26   | 0.31 | 0.37 | 0.87 | -0.063  | NA |
| chr3 | 51705062  | 51706022  | TEX264        | ENSG00000164081 | 351  | 0.24 | 0.23 | 0.87 | 0.013   | NA |
| chr3 | 52739537  | 52740426  | SPCS1         | ENSG00000114902 | 329  | 0.23 | 0.25 | 0.87 | -0.013  | NA |
| chr3 | 66550318  | 66551848  | LRIG1         | ENSG00000144749 | 273  | 0.16 | 0.16 | 0.87 | -0.0057 | NA |
| chr3 | 147138916 | 147139564 | ZIC1          | ENSG00000152977 | 126  | 0.23 | 0.21 | 0.87 | 0.024   | NA |
| chr3 | 12525749  | 12526346  | TSEN2         | ENSG00000154743 | 116  | 0.2  | 0.18 | 0.88 | 0.02    | NA |
| chr3 | 15106459  | 15106971  | MRPS25        | ENSG00000131368 | 52   | 0.18 | 0.17 | 0.88 | 0.015   | NA |
| chr3 | 126113547 | 126113967 | RP11-71E19.5  | ENSG00000249833 | -63  | 0.29 | 0.18 | 0.88 | 0.1     | NA |
| chr3 | 127842318 | 127842907 | RUVBL1        | ENSG00000175792 | 31   | 0.21 | 0.24 | 0.88 | -0.026  | NA |
| chr3 | 132378558 | 132378772 | ACAD11        | ENSG00000240303 | 23   | 0.3  | 0.26 | 0.88 | 0.039   | NA |
| chr3 | 180546166 | 180546916 | FLYWCH1P1     | ENSG00000239516 | 1097 | 0.96 | 0.96 | 0.88 | 0.0063  | NA |
| chr3 | 85008284  | 85008837  | CADM2         | ENSG00000175161 | -137 | 0.19 | 0.21 | 0.89 | -0.015  | NA |

|      |           |           |               |                 |      |      |      |      |         |    |
|------|-----------|-----------|---------------|-----------------|------|------|------|------|---------|----|
| chr3 | 111578237 | 111578739 | PHLDB2        | ENSG00000144824 | -109 | 0.19 | 0.2  | 0.89 | -0.0084 | NA |
| chr3 | 125634298 | 125635949 | RP11-666A20.1 | ENSG00000171084 | -340 | 0.21 | 0.19 | 0.89 | 0.019   | NA |
| chr3 | 138312980 | 138313342 | CEP70         | ENSG00000114107 | -95  | 0.19 | 0.18 | 0.89 | 0.011   | NA |
| chr3 | 158519509 | 158520329 | MFSD1         | ENSG00000118855 | 265  | 0.31 | 0.3  | 0.89 | 0.012   | NA |
| chr3 | 194304551 | 194305051 | AC046143.5    | ENSG00000231770 | 61   | 0.16 | 0.18 | 0.89 | -0.015  | NA |
| chr3 | 22413492  | 22414365  | ZNF385D       | ENSG00000151789 | 195  | 0.2  | 0.23 | 0.9  | -0.024  | NA |
| chr3 | 33155227  | 33156054  | CRTAP         | ENSG00000170275 | 169  | 0.23 | 0.22 | 0.9  | 0.0098  | NA |
| chr3 | 39447890  | 39448644  | RPSA          | ENSG00000168028 | 87   | 0.29 | 0.32 | 0.9  | -0.039  | NA |
| chr3 | 50126252  | 50127204  | RBM5          | ENSG00000003756 | 387  | 0.26 | 0.27 | 0.9  | -0.017  | NA |
| chr3 | 58419176  | 58419818  | PDHB          | ENSG00000168291 | 44   | 0.17 | 0.18 | 0.9  | -0.017  | NA |
| chr3 | 63263989  | 63264205  | SYNPR         | ENSG00000163630 | 103  | 0.24 | 0.18 | 0.9  | 0.059   | NA |
| chr3 | 101443478 | 101443859 | CEP97         | ENSG00000182504 | 181  | 0.29 | 0.23 | 0.9  | 0.063   | NA |
| chr3 | 47020855  | 47021399  | NBEAL2        | ENSG00000160796 | -46  | 0.24 | 0.22 | 0.91 | 0.024   | NA |
| chr3 | 47844121  | 47845155  | DHX30         | ENSG00000132153 | 239  | 0.22 | 0.21 | 0.91 | 0.0069  | NA |
| chr3 | 107241845 | 107242731 | BBX           | ENSG00000114439 | 438  | 0.21 | 0.22 | 0.91 | -0.0091 | NA |
| chr3 | 129147229 | 129147617 | C3orf25       | ENSG00000172771 | 37   | 0.31 | 0.36 | 0.91 | -0.05   | NA |
| chr3 | 141456881 | 141457591 | RNF7          | ENSG00000114125 | 190  | 0.21 | 0.23 | 0.91 | -0.021  | NA |
| chr3 | 146262126 | 146262505 | PLSCR1        | ENSG00000188313 | -7   | 0.23 | 0.24 | 0.91 | -0.013  | NA |
| chr3 | 179065560 | 179065979 | MFN1          | ENSG00000171109 | -69  | 0.34 | 0.33 | 0.91 | 0.015   | NA |
| chr3 | 183353234 | 183354816 | KLHL24        | ENSG00000114796 | 669  | 0.23 | 0.23 | 0.92 | 0.0052  | NA |
| chr3 | 196466585 | 196467353 | PAK2          | ENSG00000180370 | 241  | 0.33 | 0.3  | 0.93 | 0.029   | NA |
| chr3 | 9885512   | 9885780   | RPUSD3        | ENSG00000156990 | -20  | 0.2  | 0.17 | 0.94 | 0.027   | NA |
| chr3 | 44518838  | 44519368  | ZNF445        | ENSG00000185219 | 38   | 0.16 | 0.18 | 0.94 | -0.026  | NA |
| chr3 | 186288248 | 186288638 | TBCCD1        | ENSG00000113838 | -111 | 0.24 | 0.27 | 0.94 | -0.023  | NA |
| chr3 | 10362506  | 10362941  | SEC13         | ENSG00000157020 | 2    | 0.29 | 0.26 | 0.95 | 0.029   | NA |
| chr3 | 40428651  | 40429015  | ENTPD3        | ENSG00000168032 | 97   | 0.33 | 0.35 | 0.95 | -0.024  | NA |
| chr3 | 69434926  | 69435583  | FRMD4B        | ENSG00000114541 | -176 | 0.22 | 0.2  | 0.95 | 0.024   | NA |
| chr3 | 184016577 | 184017416 | PSMD2         | ENSG00000175166 | 10   | 0.16 | 0.18 | 0.95 | -0.021  | NA |
| chr3 | 31573302  | 31575282  | STT3B         | ENSG00000163527 | 162  | 0.25 | 0.24 | 0.96 | 0.004   | NA |
| chr3 | 32021969  | 32023364  | OSBPL10       | ENSG00000144645 | -228 | 0.31 | 0.3  | 0.96 | 0.011   | NA |

|      |           |           |                |                 |      |      |      |      |          |    |
|------|-----------|-----------|----------------|-----------------|------|------|------|------|----------|----|
| chr3 | 62357639  | 62359774  | FEZF2          | ENSG00000153266 | -16  | 0.27 | 0.27 | 0.96 | 0.0038   | NA |
| chr3 | 49448861  | 49449965  | RHOA           | ENSG00000067560 | -52  | 0.19 | 0.18 | 0.97 | 0.0043   | NA |
| chr3 | 49940099  | 49940431  | MST1R          | ENSG00000164078 | 777  | 0.86 | 0.85 | 0.97 | 0.011    | NA |
| chr3 | 140769886 | 140771080 | SPSB4          | ENSG00000175093 | 239  | 0.24 | 0.24 | 0.97 | -0.0046  | NA |
| chr3 | 160938961 | 160939494 | NMD3           | ENSG00000169251 | 177  | 0.19 | 0.2  | 0.97 | -0.01    | NA |
| chr3 | 167812829 | 167814102 | GOLIM4         | ENSG00000173905 | -333 | 0.19 | 0.2  | 0.97 | -0.0069  | NA |
| chr3 | 9811466   | 9811736   | CAMK1          | ENSG00000134072 | 44   | 0.26 | 0.33 | 0.98 | -0.069   | NA |
| chr3 | 52008943  | 52009339  | RP11-155D18.11 | ENSG00000114786 | 75   | 0.31 | 0.27 | 0.98 | 0.039    | NA |
| chr3 | 195599024 | 195599392 | TNK2           | ENSG00000061938 | 45   | 0.91 | 0.9  | 0.98 | 0.011    | NA |
| chr3 | 48342584  | 48343258  | NME6           | ENSG00000172113 | -126 | 0.22 | 0.23 | 0.99 | -0.0043  | NA |
| chr3 | 152552602 | 152553712 | P2RY1          | ENSG00000169860 | 421  | 0.35 | 0.36 | 0.99 | -0.016   | NA |
| chr3 | 195594836 | 195595494 | TNK2           | ENSG00000061938 | 1396 | 0.87 | 0.87 | 0.99 | 0.0044   | NA |
| chr3 | 10289897  | 10290410  | TATDN2         | ENSG00000157014 | -443 | 0.22 | 0.22 | 1    | 0.0041   | NA |
| chr3 | 11058818  | 11059051  | SLC6A1         | ENSG00000157103 | 132  | 0.89 | 0.9  | 1    | -0.011   | NA |
| chr3 | 11195901  | 11196552  | HRH1           | ENSG00000196639 | 12   | 0.31 | 0.32 | 1    | -0.005   | NA |
| chr3 | 12837992  | 12838359  | CAND2          | ENSG00000144712 | 4    | 0.23 | 0.2  | 1    | 0.031    | NA |
| chr3 | 13008648  | 13009210  | IQSEC1         | ENSG00000144711 | 31   | 0.32 | 0.32 | 1    | 0.0042   | NA |
| chr3 | 16645948  | 16646259  | DAZL           | ENSG00000092345 | 194  | 1    | 1    | 1    | 0        | NA |
| chr3 | 20227289  | 20227956  | SGOL1          | ENSG00000129810 | -3   | 0.23 | 0.23 | 1    | #####    | NA |
| chr3 | 30936047  | 30936265  | GADL1          | ENSG00000144644 | -3   | 0.23 | 0.17 | 1    | 0.064    | NA |
| chr3 | 33482600  | 33482864  | UBP1           | ENSG00000153560 | 131  | 1    | 1    | 1    | 0        | NA |
| chr3 | 33839996  | 33840671  | PDCD6IP        | ENSG00000170248 | 267  | 0.12 | 0.14 | 1    | -0.018   | NA |
| chr3 | 38080628  | 38081187  | DLEC1          | ENSG00000008226 | 211  | 0.23 | 0.23 | 1    | -0.0002  | NA |
| chr3 | 38178002  | 38178750  | ACAA1          | ENSG00000060971 | -261 | 0.2  | 0.2  | 1    | 4.00E-04 | NA |
| chr3 | 39194241  | 39195359  | CSRNP1         | ENSG00000144655 | 266  | 0.26 | 0.26 | 1    | 0.00046  | NA |
| chr3 | 39543771  | 39544223  | MOBP           | ENSG00000168314 | 291  | 1    | 1    | 1    | 0        | NA |
| chr3 | 40518517  | 40518848  | ZNF619         | ENSG00000177873 | 78   | 0.22 | 0.24 | 1    | -0.015   | NA |
| chr3 | 44619873  | 44620267  | ZNF660         | ENSG00000144792 | 355  | 0.99 | 0.98 | 1    | 0.0063   | NA |
| chr3 | 44620551  | 44620971  | ZNF660         | ENSG00000144792 | 1046 | 0.99 | 0.98 | 1    | 0.0083   | NA |
| chr3 | 44626325  | 44626794  | ZNF197         | ENSG00000186448 | 179  | 0.2  | 0.25 | 1    | -0.045   | NA |

|      |           |           |               |                 |      |      |      |   |         |    |
|------|-----------|-----------|---------------|-----------------|------|------|------|---|---------|----|
| chr3 | 46874892  | 46875769  | PRSS42        | ENSG00000178055 | -17  | 0.95 | 0.94 | 1 | 0.0028  | NA |
| chr3 | 47554805  | 47555404  | C3orf75       | ENSG00000163832 | -275 | 0.16 | 0.16 | 1 | 0.0013  | NA |
| chr3 | 48129925  | 48130896  | MAP4          | ENSG00000047849 | -96  | 0.19 | 0.18 | 1 | 0.0028  | NA |
| chr3 | 48481414  | 48481805  | CCDC51        | ENSG00000164051 | -134 | 0.19 | 0.19 | 1 | -0.0028 | NA |
| chr3 | 50242550  | 50243589  | SLC38A3       | ENSG00000188338 | 390  | 0.2  | 0.2  | 1 | 0.0018  | NA |
| chr3 | 50264402  | 50265101  | GNAI2         | ENSG00000114353 | 582  | 0.25 | 0.21 | 1 | 0.037   | NA |
| chr3 | 52272839  | 52273631  | TWF2          | ENSG00000247596 | -77  | 0.26 | 0.27 | 1 | -0.013  | NA |
| chr3 | 52521674  | 52522612  | NISCH         | ENSG00000010322 | 669  | 0.95 | 0.95 | 1 | 0.0017  | NA |
| chr3 | 53164206  | 53164698  | RFT1          | ENSG00000163933 | -25  | 0.2  | 0.27 | 1 | -0.065  | NA |
| chr3 | 55504201  | 55504453  | WNT5A         | ENSG00000114251 | -158 | 0.98 | 0.99 | 1 | -0.003  | NA |
| chr3 | 55519089  | 55519623  | WNT5A         | ENSG00000114251 | 1743 | 0.26 | 0.25 | 1 | 0.0044  | NA |
| chr3 | 55522560  | 55522836  | RP11-875H7.4  | ENSG00000244586 | 971  | 0.25 | 0.22 | 1 | 0.028   | NA |
| chr3 | 57261455  | 57262598  | APPL1         | ENSG00000157500 | 261  | 0.22 | 0.22 | 1 | -0.0023 | NA |
| chr3 | 57583020  | 57583611  | ARF4          | ENSG00000168374 | -263 | 0.18 | 0.18 | 1 | -0.0025 | NA |
| chr3 | 63849046  | 63850357  | THOC7         | ENSG00000163634 | -239 | 0.23 | 0.23 | 1 | -0.0024 | NA |
| chr3 | 69134086  | 69134479  | ARL6IP5       | ENSG00000144746 | 187  | 0.33 | 0.25 | 1 | 0.083   | NA |
| chr3 | 72977999  | 72978325  | FTH1P23       | ENSG00000242960 | -33  | 1    | 0.96 | 1 | 0.037   | NA |
| chr3 | 75707623  | 75708198  | RP11-413E6.5  | ENSG00000241622 | 225  | 1    | 1    | 1 | 0       | NA |
| chr3 | 82856984  | 82857244  | RP11-657G2.1  | ENSG00000241095 | 58   | 0.99 | 0.99 | 1 | 0.00056 | NA |
| chr3 | 88198514  | 88199513  | C3orf38       | ENSG00000179021 | 120  | 0.24 | 0.25 | 1 | -0.0051 | NA |
| chr3 | 94656732  | 94657159  | WDR82P1       | ENSG00000234629 | -77  | 0.99 | 0.99 | 1 | -0.0071 | NA |
| chr3 | 97483140  | 97483618  | ARL6          | ENSG00000113966 | 14   | 0.2  | 0.21 | 1 | -0.0016 | NA |
| chr3 | 97690785  | 97691409  | MINA          | ENSG00000170854 | -166 | 0.16 | 0.16 | 1 | 0.0037  | NA |
| chr3 | 98311909  | 98312696  | CPOX          | ENSG00000080819 | 152  | 0.26 | 0.25 | 1 | 0.011   | NA |
| chr3 | 99944104  | 99944332  | RP11-15N24.3  | ENSG00000243974 | 0    | 0.97 | 0.97 | 1 | -0.0041 | NA |
| chr3 | 101280545 | 101280952 | RG9MTD1       | ENSG00000174173 | 42   | 0.32 | 0.33 | 1 | -0.012  | NA |
| chr3 | 111697739 | 111698143 | ABHD10        | ENSG00000144827 | 84   | 0.17 | 0.16 | 1 | 0.011   | NA |
| chr3 | 111904382 | 111904845 | RP11-757F18.3 | ENSG00000244144 | 232  | 0.33 | 0.39 | 1 | -0.058  | NA |
| chr3 | 113414907 | 113415736 | KIAA2018      | ENSG00000176542 | 172  | 0.21 | 0.19 | 1 | 0.014   | NA |
| chr3 | 113822136 | 113822414 | RP11-274J15.2 | ENSG00000240912 | 200  | 1    | 1    | 1 | 0       | NA |

|      |           |           |               |                 |       |      |      |   |         |    |
|------|-----------|-----------|---------------|-----------------|-------|------|------|---|---------|----|
| chr3 | 117716100 | 117716564 | RP11-384F7.2  | ENSG00000239268 | 107   | 0.25 | 0.25 | 1 | -0.0016 | NA |
| chr3 | 120626880 | 120627579 | STXBP5L       | ENSG00000145087 | 310   | 0.29 | 0.3  | 1 | -0.0052 | NA |
| chr3 | 122920703 | 122921114 | SEC22A        | ENSG00000121542 | 134   | 0.33 | 0.25 | 1 | 0.083   | NA |
| chr3 | 123304002 | 123304218 | PTPLB         | ENSG00000206527 | -78   | 0.28 | 0.25 | 1 | 0.027   | NA |
| chr3 | 124931161 | 124931747 | SLC12A8       | ENSG00000221955 | 155   | 0.18 | 0.18 | 1 | -0.0002 | NA |
| chr3 | 125093668 | 125094365 | ZNF148        | ENSG00000163848 | 77    | 0.5  | 0.37 | 1 | 0.13    | NA |
| chr3 | 126707618 | 126708481 | PLXNA1        | ENSG00000114554 | 612   | 0.92 | 0.94 | 1 | -0.02   | NA |
| chr3 | 128997382 | 128997600 | C3orf37       | ENSG00000183624 | -180  | 0.21 | 0.2  | 1 | 0.0083  | NA |
| chr3 | 130064574 | 130064840 | COL6A5        | ENSG00000172752 | 348   | 0.19 | 0.2  | 1 | -0.0061 | NA |
| chr3 | 130745388 | 130745840 | ASTE1         | ENSG00000034533 | -184  | 0.26 | 0.24 | 1 | 0.014   | NA |
| chr3 | 131753880 | 131754139 | CPNE4         | ENSG00000196353 | -165  | 0.13 | 0.11 | 1 | 0.024   | NA |
| chr3 | 135969040 | 135969565 | PCCB          | ENSG00000114054 | 154   | 0.2  | 0.2  | 1 | -0.0064 | NA |
| chr3 | 137489051 | 137489409 | RP11-2A4.3    | ENSG00000239513 | -1561 | 0.46 | 0.5  | 1 | -0.036  | NA |
| chr3 | 137728994 | 137729206 | CLDN18        | ENSG00000066405 | 42    | 0.95 | 0.92 | 1 | 0.031   | NA |
| chr3 | 137833848 | 137834592 | DZIP1L        | ENSG00000158163 | 231   | 0.24 | 0.24 | 1 | -0.0017 | NA |
| chr3 | 139062920 | 139063146 | MRPS22        | ENSG00000175110 | 75    | 0.35 | 0.36 | 1 | -0.006  | NA |
| chr3 | 140784809 | 140785481 | SPSB4         | ENSG00000175093 | -335  | 1    | 1    | 1 | 0.0047  | NA |
| chr3 | 140951193 | 140951451 | ACPL2         | ENSG00000155893 | 566   | 0.19 | 0.17 | 1 | 0.022   | NA |
| chr3 | 147136903 | 147137328 | ZIC1          | ENSG00000152977 | -1999 | 0.17 | 0.14 | 1 | 0.028   | NA |
| chr3 | 148847198 | 148847968 | HPS3          | ENSG00000163755 | 212   | 0.17 | 0.16 | 1 | 0.0095  | NA |
| chr3 | 149469909 | 149470388 | COMMD2        | ENSG00000114744 | 37    | 0.5  | 1    | 1 | -0.5    | NA |
| chr3 | 149700904 | 149701152 | RP11-651P23.4 | ENSG00000224831 | 67    | 1    | 1    | 1 | 0       | NA |
| chr3 | 155461917 | 155462561 | PLCH1         | ENSG00000114805 | 617   | 0.22 | 0.23 | 1 | -0.0074 | NA |
| chr3 | 157155267 | 157155826 | VEPH1         | ENSG00000197415 | -804  | 0.33 | 0.38 | 1 | -0.042  | NA |
| chr3 | 158362180 | 158362478 | GFM1          | ENSG00000168827 | 12    | 0.36 | 0.36 | 1 | -0.008  | NA |
| chr3 | 159706490 | 159707011 | IL12A         | ENSG00000168811 | 213   | 0.26 | 0.25 | 1 | 0.0033  | NA |
| chr3 | 170303532 | 170303768 | SLC7A14       | ENSG00000013293 | 166   | 0.25 | 0.22 | 1 | 0.028   | NA |
| chr3 | 170371811 | 170372083 | RP11-373E16.1 | ENSG00000213174 | 101   | 0.96 | 0.97 | 1 | -0.0084 | NA |
| chr3 | 172428416 | 172428950 | NCEH1         | ENSG00000144959 | 159   | 0.36 | 0.33 | 1 | 0.03    | NA |
| chr3 | 174094995 | 174095258 | RP11-393N4.2  | ENSG00000213169 | 92    | 0.98 | 0.98 | 1 | -0.0065 | NA |



|      |           |           |               |                 |       |      |      |          |         |    |
|------|-----------|-----------|---------------|-----------------|-------|------|------|----------|---------|----|
| chr3 | 182896920 | 182897381 | MCF2L2        | ENSG00000053524 | 949   | 0.25 | 0.25 | 1        | -0.006  | NA |
| chr3 | 183602432 | 183602874 | PARL          | ENSG00000175193 | -138  | 0.31 | 0.31 | 1        | 0.0059  | NA |
| chr3 | 185216310 | 185217131 | TMEM41A       | ENSG00000163900 | -210  | 0.27 | 0.27 | 1        | 0.0013  | NA |
| chr3 | 189838080 | 189838879 | LEPREL1       | ENSG00000090530 | 239   | 0.31 | 0.32 | 1        | -0.012  | NA |
| chr3 | 193776091 | 193776308 | RP11-407B7.1  | ENSG00000230102 | 67    | 0.26 | 0.26 | 1        | -0.0015 | NA |
| chr3 | 195613588 | 195613966 | TNK2          | ENSG00000061938 | -633  | 1    | 1    | 1        | 0       | NA |
| chr3 | 196754626 | 196754831 | MFI2          | ENSG00000163975 | -793  | 0.98 | 0.98 | 1        | -0.0018 | NA |
| chr3 | 9594068   | 9594328   | LHFPL4        | ENSG00000156959 | -207  | 0.31 | NA   | NA       | NA      | NA |
| chr3 | 15919450  | 15919653  | AC090945.1    | ENSG00000224728 | -3    | 1    | NA   | NA       | NA      | NA |
| chr3 | 19188246  | 19188772  | KCNH8         | ENSG00000183960 | -1437 | NA   | 0.24 | NA       | NA      | NA |
| chr3 | 27765196  | 27765675  | EOMES         | ENSG00000163508 | -1229 | 0.33 | NA   | NA       | NA      | NA |
| chr3 | 54154731  | 54154970  | CACNA2D3      | ENSG00000157445 | -1724 | 0.67 | NA   | NA       | NA      | NA |
| chr3 | 63898485  | 63898774  | ATXN7         | ENSG00000163635 | 354   | 0.5  | NA   | NA       | NA      | NA |
| chr3 | 124303529 | 124304092 | KALRN         | ENSG00000160145 | 281   | 0.33 | NA   | NA       | NA      | NA |
| chr3 | 125687903 | 125688331 | ROPN1B        | ENSG00000114547 | 130   | 1    | NA   | NA       | NA      | NA |
| chr3 | 128399481 | 128400155 | RPN1          | ENSG00000163902 | 100   | NA   | 0.15 | NA       | NA      | NA |
| chr3 | 128483727 | 128484050 | FTH1P4        | ENSG00000242992 | -28   | 1    | NA   | NA       | NA      | NA |
| chr3 | 128564771 | 128565007 | RP11-221E20.5 | ENSG00000244065 | -1642 | 0.65 | NA   | NA       | NA      | NA |
| chr3 | 155572358 | 155572604 | SLC33A1       | ENSG00000169359 | -263  | NA   | 1    | NA       | NA      | NA |
| chr3 | 187387914 | 187388176 | SST           | ENSG00000157005 | 142   | 0.22 | NA   | NA       | NA      | NA |
| chr3 | 190232236 | 190232444 | IL1RAP        | ENSG00000196083 | 432   | NA   | 1    | NA       | NA      | NA |
| chr3 | 193310824 | 193311188 | RP11-175P19.2 | ENSG00000236297 | -127  | 0.27 | NA   | NA       | NA      | NA |
| chr3 | 195351369 | 195351961 | AC069213.1    | ENSG00000249796 | 442   | NA   | 1    | NA       | NA      | NA |
| chr4 | 72897564  | 72897964  | NPFFR2        | ENSG00000056291 | 145   | 0.52 | 0.15 | 3.40E-09 | 0.37    | NA |
| chr4 | 11370229  | 11370886  | MIR572        | ENSG00000207716 | 106   | 0.93 | 0.72 | 3.50E-09 | 0.22    | NA |
| chr4 | 17578648  | 17579539  | LAP3          | ENSG00000002549 | 278   | 0.25 | 0.1  | 1.40E-07 | 0.15    | NA |
| chr4 | 99181509  | 99183199  | RAP1GDS1      | ENSG00000138698 | -181  | 0.28 | 0.14 | 3.40E-07 | 0.13    | NA |
| chr4 | 88928480  | 88929659  | PKD2          | ENSG00000118762 | 249   | 0.3  | 0.16 | 3.70E-07 | 0.14    | NA |
| chr4 | 74809869  | 74810089  | RP11-88J6.1   | ENSG00000250339 | 37    | 0.55 | 0.1  | 5.20E-07 | 0.45    | NA |
| chr4 | 13543562  | 13546494  | NKX3-2        | ENSG00000109705 | 1646  | 0.39 | 0.28 | 6.50E-07 | 0.11    | NA |

|      |           |           |               |                 |       |      |      |          |        |    |
|------|-----------|-----------|---------------|-----------------|-------|------|------|----------|--------|----|
| chr4 | 102711829 | 102712199 | BANK1         | ENSG00000153064 | 127   | 0.66 | 0.38 | 2.00E-06 | 0.28   | NA |
| chr4 | 38869401  | 38869780  | FAM114A1      | ENSG00000197712 | 153   | 0.59 | 0.32 | 3.80E-06 | 0.27   | NA |
| chr4 | 184365197 | 184366435 | CDKN2AIP      | ENSG00000168564 | 72    | 0.22 | 0.12 | 4.10E-06 | 0.1    | NA |
| chr4 | 119757033 | 119757811 | SEC24D        | ENSG00000150961 | -129  | 0.38 | 0.11 | 4.20E-06 | 0.27   | NA |
| chr4 | 10117575  | 10118952  | WDR1          | ENSG00000071127 | -313  | 0.33 | 0.17 | 4.60E-06 | 0.17   | NA |
| chr4 | 144105684 | 144106832 | RP11-284M14.1 | ENSG00000250326 | -276  | 0.27 | 0.15 | 5.50E-06 | 0.12   | NA |
| chr4 | 2418310   | 2420894   | ZFYVE28       | ENSG00000159733 | 734   | 0.25 | 0.15 | 7.50E-06 | 0.1    | NA |
| chr4 | 110480827 | 110482060 | CCDC109B      | ENSG00000005059 | 82    | 0.37 | 0.22 | 8.90E-06 | 0.15   | NA |
| chr4 | 187476279 | 187476844 | MTNR1A        | ENSG00000168412 | -97   | 0.32 | 0.12 | 9.30E-06 | 0.2    | NA |
| chr4 | 1803076   | 1805672   | FGFR3         | ENSG00000068078 | 1185  | 0.89 | 0.96 | 9.80E-06 | -0.065 | NA |
| chr4 | 30721204  | 30724842  | PCDH7         | ENSG00000169851 | 986   | 0.3  | 0.21 | 1.40E-05 | 0.082  | NA |
| chr4 | 146540053 | 146540656 | MMAA          | ENSG00000151611 | 217   | 0.28 | 0.14 | 1.50E-05 | 0.14   | NA |
| chr4 | 89299990  | 89300429  | HERC6         | ENSG00000138642 | 194   | 0.12 | 0.47 | 2.10E-05 | -0.35  | NA |
| chr4 | 95678798  | 95679809  | BMPR1B        | ENSG00000138696 | 184   | 0.22 | 0.11 | 2.60E-05 | 0.1    | NA |
| chr4 | 25863760  | 25864845  | SEL1L3        | ENSG00000091490 | 279   | 0.17 | 0.28 | 3.10E-05 | -0.11  | NA |
| chr4 | 111542062 | 111544464 | PITX2         | ENSG00000164093 | 996   | 0.3  | 0.2  | 3.40E-05 | 0.1    | NA |
| chr4 | 146857334 | 146859082 | ZNF827        | ENSG00000151612 | 1415  | 0.3  | 0.19 | 4.00E-05 | 0.11   | NA |
| chr4 | 55991402  | 55992171  | KDR           | ENSG00000128052 | -326  | 0.23 | 0.12 | 5.00E-05 | 0.11   | NA |
| chr4 | 966732    | 968137    | DGKQ          | ENSG00000145214 | -324  | 0.41 | 0.3  | 5.20E-05 | 0.12   | NA |
| chr4 | 121992003 | 121993703 | RP11-647P12.1 | ENSG00000250344 | 269   | 0.37 | 0.22 | 6.20E-05 | 0.15   | NA |
| chr4 | 619513    | 619912    | PDE6B         | ENSG00000133256 | 317   | 0.65 | 1    | 7.50E-05 | -0.35  | NA |
| chr4 | 6910935   | 6912310   | TBC1D14       | ENSG00000132405 | 653   | 0.36 | 0.22 | 0.00011  | 0.14   | NA |
| chr4 | 187644319 | 187648253 | FAT1          | ENSG00000083857 | -1299 | 0.27 | 0.2  | 0.00011  | 0.072  | NA |
| chr4 | 103422091 | 103423229 | NFKB1         | ENSG00000109320 | 174   | 0.24 | 0.15 | 0.00013  | 0.09   | NA |
| chr4 | 113435898 | 113438002 | RP11-402J6.1  | ENSG00000249509 | 409   | 0.29 | 0.18 | 0.00014  | 0.1    | NA |
| chr4 | 6642194   | 6643322   | MRFAP1        | ENSG00000179010 | 345   | 0.26 | 0.14 | 0.00017  | 0.12   | NA |
| chr4 | 15003059  | 15006761  | AC006296.3    | ENSG00000247624 | -1241 | 0.21 | 0.15 | 0.00019  | 0.056  | NA |
| chr4 | 25915352  | 25915996  | C4orf52       | ENSG00000250317 | 146   | 0.34 | 0.16 | 0.00022  | 0.17   | NA |
| chr4 | 187066155 | 187066460 | FAM149A       | ENSG00000109794 | 226   | 0.28 | 0.1  | 0.00029  | 0.18   | NA |
| chr4 | 113066470 | 113067379 | C4orf32       | ENSG00000174749 | 371   | 0.21 | 0.13 | 3.00E-04 | 0.08   | NA |

|      |           |           |               |                 |      |      |      |          |        |    |
|------|-----------|-----------|---------------|-----------------|------|------|------|----------|--------|----|
| chr4 | 46995128  | 46995872  | GABRA4        | ENSG00000109158 | 22   | 0.5  | 0.15 | 0.00033  | 0.35   | NA |
| chr4 | 125633390 | 125634275 | ANKRD50       | ENSG00000151458 | 55   | 0.17 | 0.33 | 0.00036  | -0.16  | NA |
| chr4 | 18022435  | 18024273  | LCORL         | ENSG00000178177 | 24   | 0.29 | 0.2  | 4.00E-04 | 0.095  | NA |
| chr4 | 1003106   | 1005455   | FGFRL1        | ENSG00000127418 | 556  | 0.28 | 0.18 | 0.00048  | 0.094  | NA |
| chr4 | 157997166 | 157997686 | GLRB          | ENSG00000109738 | 217  | 0.36 | 0.15 | 0.00051  | 0.21   | NA |
| chr4 | 183369276 | 183370459 | ODZ3          | ENSG00000218336 | -285 | 0.2  | 0.13 | 0.00058  | 0.07   | NA |
| chr4 | 100009736 | 100010129 | ADH5          | ENSG00000197894 | -79  | 0.39 | 0.16 | 0.00063  | 0.23   | NA |
| chr4 | 113152512 | 113153656 | AP1AR         | ENSG00000138660 | 191  | 0.16 | 0.26 | 0.00074  | -0.099 | NA |
| chr4 | 53728037  | 53729000  | RASL11B       | ENSG00000128045 | 61   | 0.22 | 0.09 | 0.00083  | 0.13   | NA |
| chr4 | 71859158  | 71859884  | DCK           | ENSG00000156136 | 241  | 0.19 | 0.35 | 0.00089  | -0.16  | NA |
| chr4 | 166299975 | 166300668 | CPE           | ENSG00000109472 | 227  | 0.24 | 0.14 | 0.00098  | 0.1    | NA |
| chr4 | 3533643   | 3534788   | LRPAP1        | ENSG00000163956 | -339 | 0.3  | 0.2  | 0.0011   | 0.1    | NA |
| chr4 | 37245250  | 37246979  | KIAA1239      | ENSG00000174145 | 272  | 0.16 | 0.25 | 0.0011   | -0.082 | NA |
| chr4 | 111397677 | 111398089 | ENPEP         | ENSG00000138792 | 654  | 0.76 | 0.94 | 0.0012   | -0.18  | NA |
| chr4 | 26862031  | 26863238  | RP11-293A21.1 | ENSG00000240005 | -431 | 0.3  | 0.21 | 0.0013   | 0.095  | NA |
| chr4 | 48271362  | 48271846  | TEC           | ENSG00000135605 | 277  | 0.26 | 0.11 | 0.0014   | 0.16   | NA |
| chr4 | 42658278  | 42659550  | ATP8A1        | ENSG00000124406 | 196  | 0.25 | 0.16 | 0.0015   | 0.093  | NA |
| chr4 | 184826253 | 184828177 | STOX2         | ENSG00000173320 | 706  | 0.2  | 0.27 | 0.0015   | -0.072 | NA |
| chr4 | 185746557 | 185747827 | ACSL1         | ENSG00000151726 | -4   | 0.24 | 0.15 | 0.0016   | 0.087  | NA |
| chr4 | 925580    | 926488    | GAK           | ENSG00000178950 | -26  | 0.25 | 0.16 | 0.0017   | 0.089  | NA |
| chr4 | 1722179   | 1723850   | TMEM129       | ENSG00000168936 | -506 | 0.24 | 0.17 | 0.002    | 0.076  | NA |
| chr4 | 88140842  | 88141945  | KLHL8         | ENSG00000145332 | 27   | 0.18 | 0.11 | 0.0021   | 0.069  | NA |
| chr4 | 150999250 | 151000706 | DCLK2         | ENSG00000170390 | 552  | 0.21 | 0.27 | 0.0021   | -0.061 | NA |
| chr4 | 114682069 | 114682886 | CAMK2D        | ENSG00000145349 | -253 | 0.22 | 0.13 | 0.0022   | 0.098  | NA |
| chr4 | 109683729 | 109684362 | AGXT2L1       | ENSG00000164089 | -172 | 0.14 | 0.28 | 0.0024   | -0.14  | NA |
| chr4 | 1164515   | 1166582   | SPON2         | ENSG00000159674 | -690 | 0.39 | 0.29 | 0.0025   | 0.1    | NA |
| chr4 | 41753669  | 41753947  | RP11-227F19.2 | ENSG00000249122 | 1446 | 0.38 | 0.21 | 0.0027   | 0.17   | NA |
| chr4 | 151504011 | 151505085 | MAB21L2       | ENSG00000181541 | 1471 | 0.63 | 0.7  | 0.0027   | -0.077 | NA |
| chr4 | 107956555 | 107957453 | DKK2          | ENSG00000155011 | -35  | 0.15 | 0.67 | 0.0028   | -0.52  | NA |
| chr4 | 981480    | 981704    | IDUA          | ENSG00000127415 | -111 | 0.78 | 0.43 | 0.0033   | 0.35   | NA |

|      |           |           |              |                 |       |      |      |        |        |    |
|------|-----------|-----------|--------------|-----------------|-------|------|------|--------|--------|----|
| chr4 | 76597635  | 76598920  | G3BP2        | ENSG00000138757 | -412  | 0.25 | 0.17 | 0.0033 | 0.077  | NA |
| chr4 | 76911843  | 76912252  | SDAD1        | ENSG00000198301 | 37    | 0.37 | 0.14 | 0.0033 | 0.23   | NA |
| chr4 | 77869440  | 77872122  | 11-Sep       | ENSG00000138758 | -75   | 0.3  | 0.22 | 0.0033 | 0.076  | NA |
| chr4 | 80885844  | 80886148  | ANTXR2       | ENSG00000163297 | 48    | 0.99 | 0.67 | 0.0033 | 0.32   | NA |
| chr4 | 36245631  | 36246389  | RP11-431M7.3 | ENSG00000247193 | 272   | 0.15 | 0.23 | 0.0042 | -0.08  | NA |
| chr4 | 44449386  | 44451133  | KCTD8        | ENSG00000183783 | -629  | 0.17 | 0.23 | 0.0042 | -0.062 | NA |
| chr4 | 148402198 | 148402760 | EDNRA        | ENSG00000151617 | 395   | 0.36 | 0.21 | 0.0044 | 0.15   | NA |
| chr4 | 62065883  | 62068801  | LPHN3        | ENSG00000150471 | 366   | 0.19 | 0.27 | 0.0045 | -0.082 | NA |
| chr4 | 77342010  | 77342707  | CCDC158      | ENSG00000163749 | 638   | 0.2  | 0.31 | 0.0045 | -0.11  | NA |
| chr4 | 1685405   | 1686743   | FAM53A       | ENSG00000174137 | -356  | 0.17 | 0.25 | 0.0047 | -0.083 | NA |
| chr4 | 13485522  | 13486533  | RAB28        | ENSG00000157869 | -72   | 0.31 | 0.2  | 0.0047 | 0.11   | NA |
| chr4 | 144434249 | 144435343 | SMARCA5      | ENSG00000153147 | 180   | 0.29 | 0.17 | 0.005  | 0.12   | NA |
| chr4 | 56261697  | 56262503  | TMEM165      | ENSG00000134851 | -24   | 0.23 | 0.13 | 0.0051 | 0.096  | NA |
| chr4 | 40858884  | 40859162  | APBB2        | ENSG00000163697 | 149   | 0.16 | 0.27 | 0.0052 | -0.11  | NA |
| chr4 | 155664819 | 155665833 | LRAT         | ENSG00000121207 | 203   | 0.24 | 0.15 | 0.0054 | 0.089  | NA |
| chr4 | 94749495  | 94750998  | ATOH1        | ENSG00000172238 | 204   | 0.34 | 0.22 | 0.0058 | 0.12   | NA |
| chr4 | 84255726  | 84256399  | HPSE         | ENSG00000173083 | -166  | 0.15 | 0.27 | 0.0062 | -0.12  | NA |
| chr4 | 681313    | 681514    | MFSD7        | ENSG00000169026 | -299  | 0.82 | 1    | 0.0063 | -0.18  | NA |
| chr4 | 155663809 | 155664315 | LRAT         | ENSG00000121207 | -1061 | 0.65 | 0.45 | 0.0065 | 0.2    | NA |
| chr4 | 174450046 | 174451469 | HAND2        | ENSG00000164107 | -694  | 0.35 | 0.2  | 0.0071 | 0.15   | NA |
| chr4 | 113332941 | 113333323 | ALPK1        | ENSG00000073331 | 1061  | 0.71 | 0.31 | 0.0077 | 0.4    | NA |
| chr4 | 1021106   | 1021338   | RP11-46019.2 | ENSG00000250259 | -244  | 0.89 | 0.62 | 0.0078 | 0.27   | NA |
| chr4 | 2470219   | 2471728   | RNF4         | ENSG00000063978 | 517   | 0.21 | 0.29 | 0.0078 | -0.079 | NA |
| chr4 | 185939222 | 185942747 | HELT         | ENSG00000187821 | 989   | 0.25 | 0.17 | 0.008  | 0.081  | NA |
| chr4 | 2042115   | 2044581   | WHSC2        | ENSG00000185049 | 282   | 0.19 | 0.24 | 0.0081 | -0.049 | NA |
| chr4 | 155661678 | 155661984 | LRAT         | ENSG00000121207 | -159  | 0.96 | 0.76 | 0.0081 | 0.2    | NA |
| chr4 | 1202956   | 1203200   | SPON2        | ENSG00000159674 | -328  | 0.58 | 0.08 | 0.0092 | 0.5    | NA |
| chr4 | 52942978  | 52943248  | SPATA18      | ENSG00000163071 | -1397 | 0.24 | 0.15 | 0.0092 | 0.088  | NA |
| chr4 | 9783035   | 9784960   | DRD5         | ENSG00000169676 | 739   | 0.55 | 0.64 | 0.0095 | -0.089 | NA |
| chr4 | 169753048 | 169754535 | PALLD        | ENSG00000129116 | 635   | 0.27 | 0.18 | 0.0099 | 0.088  | NA |

|      |           |           |               |                 |       |      |      |       |        |    |
|------|-----------|-----------|---------------|-----------------|-------|------|------|-------|--------|----|
| chr4 | 57458635  | 57459028  | AC108215.1    | ENSG00000248590 | -161  | 0.73 | 0.59 | 0.01  | 0.14   | NA |
| chr4 | 78783745  | 78784015  | MRPL1         | ENSG00000169288 | -104  | 0.19 | 0.6  | 0.01  | -0.41  | NA |
| chr4 | 190905233 | 190906124 | TUBB4Q        | ENSG00000251297 | 348   | 0.78 | 0.88 | 0.01  | -0.094 | NA |
| chr4 | 1396291   | 1401730   | NKX1-1        | ENSG00000235608 | 1109  | 0.28 | 0.25 | 0.011 | 0.037  | NA |
| chr4 | 56212294  | 56213063  | SRD5A3        | ENSG00000128039 | 99    | 0.21 | 0.13 | 0.013 | 0.074  | NA |
| chr4 | 57301340  | 57302670  | PPAT          | ENSG00000128059 | -343  | 0.19 | 0.29 | 0.013 | -0.098 | NA |
| chr4 | 158143296 | 158144053 | GRIA2         | ENSG00000120251 | 856   | 0.18 | 0.29 | 0.013 | -0.11  | NA |
| chr4 | 2795139   | 2795467   | SH3BP2        | ENSG00000087266 | -148  | 0.21 | 0.41 | 0.014 | -0.2   | NA |
| chr4 | 8159728   | 8160893   | ABLIM2        | ENSG00000163995 | 106   | 0.25 | 0.18 | 0.014 | 0.072  | NA |
| chr4 | 149363212 | 149367056 | NR3C2         | ENSG00000151623 | -1758 | 0.23 | 0.18 | 0.014 | 0.049  | NA |
| chr4 | 168155005 | 168155765 | SPOCK3        | ENSG00000196104 | -179  | 0.32 | 0.2  | 0.016 | 0.12   | NA |
| chr4 | 1580050   | 1580455   | RP11-1398P2.1 | ENSG00000244459 | 1728  | 0.37 | 0.65 | 0.017 | -0.28  | NA |
| chr4 | 81951941  | 81952808  | BMP3          | ENSG00000152785 | 255   | 0.14 | 0.21 | 0.017 | -0.073 | NA |
| chr4 | 109087747 | 109090407 | LEF1          | ENSG00000138795 | -1200 | 0.29 | 0.23 | 0.018 | 0.063  | NA |
| chr4 | 177240935 | 177241832 | SPCS3         | ENSG00000129128 | 268   | 0.27 | 0.19 | 0.018 | 0.083  | NA |
| chr4 | 37828144  | 37828945  | PGM2          | ENSG00000169299 | 289   | 0.22 | 0.12 | 0.019 | 0.096  | NA |
| chr4 | 6710948   | 6711793   | MRFAP1L1      | ENSG00000178988 | 184   | 0.32 | 0.13 | 0.02  | 0.19   | NA |
| chr4 | 166128385 | 166129255 | KLHL2         | ENSG00000109466 | 50    | 0.17 | 0.1  | 0.02  | 0.07   | NA |
| chr4 | 184425262 | 184427628 | RP11-367N14.2 | ENSG00000232648 | -798  | 0.22 | 0.28 | 0.02  | -0.063 | NA |
| chr4 | 55523409  | 55525297  | KIT           | ENSG00000157404 | 268   | 0.17 | 0.23 | 0.021 | -0.059 | NA |
| chr4 | 184579921 | 184580644 | RWDD4         | ENSG00000182552 | 22    | 0.2  | 0.29 | 0.021 | -0.083 | NA |
| chr4 | 140036277 | 140036689 | PPP1R14BP3    | ENSG00000179967 | 45    | 0.95 | 0.85 | 0.022 | 0.1    | NA |
| chr4 | 93226348  | 93227007  | GRID2         | ENSG00000152208 | 869   | 0.24 | 0.15 | 0.023 | 0.084  | NA |
| chr4 | 128981810 | 128983478 | LARP1B        | ENSG00000138709 | 221   | 0.2  | 0.15 | 0.023 | 0.051  | NA |
| chr4 | 81187494  | 81187913  | FGF5          | ENSG00000138675 | -50   | 0.22 | 0.15 | 0.024 | 0.079  | NA |
| chr4 | 124318307 | 124319998 | SPRY1         | ENSG00000164056 | -188  | 0.25 | 0.19 | 0.024 | 0.062  | NA |
| chr4 | 57842634  | 57843893  | POLR2B        | ENSG00000047315 | -625  | 0.21 | 0.15 | 0.025 | 0.062  | NA |
| chr4 | 83719009  | 83720241  | SCD5          | ENSG00000145284 | 284   | 0.19 | 0.25 | 0.025 | -0.055 | NA |
| chr4 | 165304328 | 165305177 | 1-Mar         | ENSG00000145416 | -83   | 0.24 | 0.13 | 0.025 | 0.11   | NA |
| chr4 | 20253276  | 20256868  | SLIT2         | ENSG00000145147 | 189   | 0.24 | 0.19 | 0.026 | 0.046  | NA |

|      |           |           |               |                 |       |      |      |       |        |    |
|------|-----------|-----------|---------------|-----------------|-------|------|------|-------|--------|----|
| chr4 | 1580673   | 1582096   | RP11-1398P2.1 | ENSG00000244459 | 596   | 0.29 | 0.21 | 0.027 | 0.078  | NA |
| chr4 | 8873235   | 8876433   | HMX1          | ENSG00000215612 | -1486 | 0.23 | 0.19 | 0.027 | 0.041  | NA |
| chr4 | 1205817   | 1206203   | CTBP1         | ENSG00000159692 | 828   | 0.55 | 0.34 | 0.028 | 0.21   | NA |
| chr4 | 188534687 | 188534913 | RP11-565A3.1  | ENSG00000249642 | -119  | 1    | 0.83 | 0.028 | 0.17   | NA |
| chr4 | 164415409 | 164416186 | C4orf43       | ENSG00000198498 | 203   | 0.26 | 0.16 | 0.03  | 0.093  | NA |
| chr4 | 57773867  | 57775602  | REST          | ENSG00000084093 | 692   | 0.27 | 0.21 | 0.032 | 0.067  | NA |
| chr4 | 74702420  | 74702627  | CXCL6         | ENSG00000124875 | 166   | 0.22 | 0.1  | 0.032 | 0.12   | NA |
| chr4 | 2464006   | 2464735   | RNF4          | ENSG00000063978 | 423   | 0.33 | 0.21 | 0.033 | 0.12   | NA |
| chr4 | 148604954 | 148605625 | PRMT10        | ENSG00000164169 | -13   | 0.36 | 0.2  | 0.033 | 0.16   | NA |
| chr4 | 143766940 | 143768413 | INPP4B        | ENSG00000109452 | -233  | 0.21 | 0.14 | 0.034 | 0.064  | NA |
| chr4 | 6271280   | 6272182   | WFS1          | ENSG00000109501 | 155   | 0.22 | 0.15 | 0.035 | 0.072  | NA |
| chr4 | 56411993  | 56413357  | CLOCK         | ENSG00000134852 | -576  | 0.23 | 0.17 | 0.035 | 0.059  | NA |
| chr4 | 100574403 | 100574654 | RP11-766F14.2 | ENSG00000248713 | 1277  | 0.82 | 0.68 | 0.035 | 0.15   | NA |
| chr4 | 170678944 | 170679255 | C4orf27       | ENSG00000056050 | -44   | 0.18 | 0.11 | 0.035 | 0.069  | NA |
| chr4 | 103265627 | 103266785 | SLC39A8       | ENSG00000138821 | 90    | 0.22 | 0.3  | 0.036 | -0.081 | NA |
| chr4 | 147096877 | 147097562 | LSM6          | ENSG00000164167 | 340   | 0.22 | 0.15 | 0.036 | 0.071  | NA |
| chr4 | 146019163 | 146019826 | ANAPC10       | ENSG00000164162 | -207  | 0.28 | 0.18 | 0.037 | 0.1    | NA |
| chr4 | 47915861  | 47916880  | NIPAL1        | ENSG00000163293 | 211   | 0.25 | 0.18 | 0.038 | 0.068  | NA |
| chr4 | 76439435  | 76440003  | RCHY1         | ENSG00000163743 | -253  | 0.21 | 0.11 | 0.038 | 0.095  | NA |
| chr4 | 159644148 | 159644665 | PPID          | ENSG00000171497 | 142   | 0.17 | 0.29 | 0.041 | -0.12  | NA |
| chr4 | 83294845  | 83295786  | HNRNPD        | ENSG00000138668 | -206  | 0.18 | 0.33 | 0.044 | -0.14  | NA |
| chr4 | 83350053  | 83352459  | HNRPDL        | ENSG00000152795 | -678  | 0.21 | 0.25 | 0.044 | -0.048 | NA |
| chr4 | 153700539 | 153701491 | TIGD4         | ENSG00000169989 | -99   | 0.21 | 0.15 | 0.044 | 0.058  | NA |
| chr4 | 298803    | 299312    | ZNF732        | ENSG00000186777 | 53    | 0.24 | 0.46 | 0.046 | -0.22  | NA |
| chr4 | 8442433   | 8443113   | ACOX3         | ENSG00000087008 | -335  | 0.22 | 0.14 | 0.046 | 0.073  | NA |
| chr4 | 57521621  | 57522703  | HOPX          | ENSG00000171476 | 308   | 0.2  | 0.14 | 0.047 | 0.059  | NA |
| chr4 | 984926    | 985695    | SLC26A1       | ENSG00000145217 | -327  | 0.91 | 0.95 | 0.048 | -0.042 | NA |
| chr4 | 103997208 | 103998007 | NHEDC2        | ENSG00000164038 | -147  | 0.16 | 0.2  | 0.048 | -0.043 | NA |
| chr4 | 42399152  | 42400802  | SHISA3        | ENSG00000178343 | 121   | 0.2  | 0.15 | 0.049 | 0.048  | NA |
| chr4 | 83482744  | 83483091  | TMEM150C      | ENSG00000249242 | 191   | 0.22 | 0.13 | 0.049 | 0.09   | NA |

|      |           |           |               |                 |      |      |      |       |        |    |
|------|-----------|-----------|---------------|-----------------|------|------|------|-------|--------|----|
| chr4 | 37455279  | 37455757  | C4orf19       | ENSG00000154274 | -45  | 0.14 | 0.21 | 0.051 | -0.068 | NA |
| chr4 | 106816415 | 106817769 | NPNT          | ENSG00000168743 | 498  | 0.24 | 0.31 | 0.051 | -0.077 | NA |
| chr4 | 71767793  | 71768663  | MOBK1A        | ENSG00000173542 | 185  | 0.21 | 0.16 | 0.054 | 0.055  | NA |
| chr4 | 467471    | 467839    | ZNF721        | ENSG00000182903 | 185  | 0.27 | 0.15 | 0.055 | 0.12   | NA |
| chr4 | 187025732 | 187026873 | FAM149A       | ENSG00000109794 | 71   | 0.16 | 0.21 | 0.056 | -0.044 | NA |
| chr4 | 20701817  | 20702336  | PACRGL        | ENSG00000163138 | 40   | 0.4  | 0.13 | 0.057 | 0.27   | NA |
| chr4 | 17811954  | 17813227  | DCAF16        | ENSG00000163257 | -256 | 0.26 | 0.19 | 0.058 | 0.07   | NA |
| chr4 | 187111939 | 187113286 | CYP4V2        | ENSG00000145476 | -62  | 0.25 | 0.2  | 0.059 | 0.053  | NA |
| chr4 | 1221837   | 1222050   | CTBP1         | ENSG00000159692 | 129  | 0.97 | 0.83 | 0.06  | 0.14   | NA |
| chr4 | 1807117   | 1807522   | FGFR3         | ENSG00000068078 | 1100 | 0.86 | 0.98 | 0.062 | -0.12  | NA |
| chr4 | 153857112 | 153859245 | FHDC1         | ENSG00000137460 | 674  | 0.21 | 0.18 | 0.064 | 0.038  | NA |
| chr4 | 115519422 | 115520932 | UGT8          | ENSG00000174607 | 566  | 0.19 | 0.29 | 0.066 | -0.093 | NA |
| chr4 | 656993    | 658162    | PDE6B         | ENSG00000133256 | 65   | 0.25 | 0.2  | 0.067 | 0.055  | NA |
| chr4 | 6472175   | 6474534   | PPP2R2C       | ENSG00000074211 | 59   | 0.22 | 0.18 | 0.067 | 0.041  | NA |
| chr4 | 186392574 | 186393184 | RP11-279O9.4  | ENSG00000249679 | 209  | 0.17 | 0.25 | 0.067 | -0.08  | NA |
| chr4 | 2794494   | 2794875   | SH3BP2        | ENSG00000087266 | -66  | 0.32 | 0.22 | 0.069 | 0.1    | NA |
| chr4 | 52904454  | 52904912  | SGCB          | ENSG00000163069 | -35  | 0.23 | 0.43 | 0.069 | -0.21  | NA |
| chr4 | 190942734 | 190944898 | DUX4L9        | ENSG00000224807 | 4    | 0.58 | 0.62 | 0.07  | -0.047 | NA |
| chr4 | 17782642  | 17783624  | FAM184B       | ENSG00000047662 | 2    | 0.2  | 0.29 | 0.071 | -0.086 | NA |
| chr4 | 141071950 | 141075566 | MAML3         | ENSG00000196782 | 365  | 0.22 | 0.18 | 0.073 | 0.045  | NA |
| chr4 | 132896360 | 132896778 | RP11-745L13.2 | ENSG00000251555 | 538  | 0.57 | 0.79 | 0.074 | -0.21  | NA |
| chr4 | 89378223  | 89378948  | HERC5         | ENSG00000138646 | 317  | 0.22 | 0.17 | 0.076 | 0.05   | NA |
| chr4 | 8582036   | 8583364   | GPR78         | ENSG00000155269 | 407  | 0.22 | 0.27 | 0.077 | -0.052 | NA |
| chr4 | 186317143 | 186318255 | ANKRD37       | ENSG00000186352 | 524  | 0.2  | 0.15 | 0.077 | 0.049  | NA |
| chr4 | 4861227   | 4862241   | MSX1          | ENSG00000163132 | 341  | 0.27 | 0.2  | 0.081 | 0.072  | NA |
| chr4 | 52708767  | 52709538  | DCUN1D4       | ENSG00000109184 | -14  | 0.23 | 0.32 | 0.081 | -0.088 | NA |
| chr4 | 174090074 | 174091423 | RP11-10K16.1  | ENSG00000245213 | -670 | 0.24 | 0.19 | 0.081 | 0.047  | NA |
| chr4 | 142557388 | 142558323 | IL15          | ENSG00000164136 | 103  | 0.26 | 0.19 | 0.084 | 0.067  | NA |
| chr4 | 1872181   | 1873986   | WHSC1         | ENSG00000109685 | -68  | 0.21 | 0.17 | 0.085 | 0.037  | NA |
| chr4 | 129732322 | 129733985 | PHF17         | ENSG00000077684 | 710  | 0.27 | 0.23 | 0.088 | 0.048  | NA |

|      |           |           |               |                 |       |      |      |       |        |    |
|------|-----------|-----------|---------------|-----------------|-------|------|------|-------|--------|----|
| chr4 | 100484727 | 100485284 | RG9MTD2       | ENSG00000145331 | -180  | 0.21 | 0.09 | 0.09  | 0.12   | NA |
| chr4 | 1340107   | 1341471   | KIAA1530      | ENSG00000163945 | -265  | 0.19 | 0.15 | 0.091 | 0.039  | NA |
| chr4 | 177713243 | 177714457 | VEGFC         | ENSG00000150630 | 31    | 0.21 | 0.16 | 0.091 | 0.05   | NA |
| chr4 | 77610324  | 77610943  | SHROOM3       | ENSG00000138771 | 22    | 0.15 | 0.21 | 0.092 | -0.057 | NA |
| chr4 | 40057484  | 40059041  | N4BP2         | ENSG00000078177 | -184  | 0.19 | 0.15 | 0.093 | 0.04   | NA |
| chr4 | 71570147  | 71571626  | RUFY3         | ENSG00000018189 | 368   | 0.25 | 0.2  | 0.097 | 0.046  | NA |
| chr4 | 122617462 | 122618623 | ANXA5         | ENSG00000164111 | 75    | 0.17 | 0.22 | 0.097 | -0.049 | NA |
| chr4 | 6200912   | 6202724   | JAKMIP1       | ENSG00000152969 | 440   | 0.22 | 0.18 | 0.098 | 0.042  | NA |
| chr4 | 1218943   | 1219718   | CTBP1         | ENSG00000159692 | -153  | 0.93 | 0.89 | 0.099 | 0.046  | NA |
| chr4 | 37978702  | 37979595  | TBC1D1        | ENSG00000065882 | 217   | 0.21 | 0.29 | 0.1   | -0.08  | NA |
| chr4 | 41362252  | 41363639  | LIMCH1        | ENSG00000064042 | 297   | 0.23 | 0.18 | 0.1   | 0.043  | NA |
| chr4 | 84030630  | 84031309  | PLAC8         | ENSG00000145287 | 27    | 0.26 | 0.2  | 0.1   | 0.062  | NA |
| chr4 | 166794545 | 166795341 | TLL1          | ENSG00000038295 | 105   | 0.18 | 0.25 | 0.1   | -0.071 | NA |
| chr4 | 1843080   | 1843352   | LETM1         | ENSG00000168924 | 1539  | 1    | 0.95 | 0.11  | 0.052  | NA |
| chr4 | 53588189  | 53588735  | RP11-177B4.1  | ENSG00000248375 | -1464 | 0.31 | 0.2  | 0.11  | 0.11   | NA |
| chr4 | 54930241  | 54931079  | CHIC2         | ENSG00000109220 | -195  | 0.24 | 0.17 | 0.11  | 0.071  | NA |
| chr4 | 120221626 | 120222007 | C4orf3        | ENSG00000164096 | 260   | 0.32 | 0.47 | 0.11  | -0.15  | NA |
| chr4 | 178363239 | 178363708 | AGA           | ENSG00000038002 | 90    | 0.28 | 0.18 | 0.11  | 0.098  | NA |
| chr4 | 190935925 | 190936999 | 5S_rRNA       | ENSG00000199572 | 169   | 0.19 | 0.33 | 0.11  | -0.14  | NA |
| chr4 | 41218314  | 41218768  | APBB2         | ENSG00000163697 | 190   | 0.53 | 0.47 | 0.12  | 0.056  | NA |
| chr4 | 53524958  | 53526227  | USP46         | ENSG00000109189 | -150  | 0.21 | 0.25 | 0.12  | -0.044 | NA |
| chr4 | 54231708  | 54232320  | SCFD2         | ENSG00000184178 | 214   | 0.26 | 0.37 | 0.12  | -0.12  | NA |
| chr4 | 110355380 | 110355598 | RP11-264J9.1  | ENSG00000247950 | -516  | 0.14 | 0.37 | 0.12  | -0.23  | NA |
| chr4 | 126235895 | 126238930 | FAT4          | ENSG00000196159 | -142  | 0.26 | 0.21 | 0.12  | 0.043  | NA |
| chr4 | 145566242 | 145567413 | RP11-291L15.2 | ENSG00000248890 | 237   | 0.35 | 0.24 | 0.12  | 0.11   | NA |
| chr4 | 8271214   | 8272091   | HTRA3         | ENSG00000170801 | 160   | 0.32 | 0.4  | 0.13  | -0.076 | NA |
| chr4 | 122685860 | 122686565 | TMEM155       | ENSG00000164112 | -297  | 0.22 | 0.17 | 0.13  | 0.051  | NA |
| chr4 | 5891981   | 5892365   | CRMP1         | ENSG00000072832 | -255  | 0.28 | 0.19 | 0.14  | 0.09   | NA |
| chr4 | 140004718 | 140005806 | ELF2          | ENSG00000109381 | 82    | 0.23 | 0.18 | 0.14  | 0.045  | NA |
| chr4 | 174451828 | 174452962 | RP11-471J12.1 | ENSG00000237125 | 69    | 0.34 | 0.25 | 0.14  | 0.09   | NA |



|      |           |           |            |                 |       |      |      |      |        |    |
|------|-----------|-----------|------------|-----------------|-------|------|------|------|--------|----|
| chr4 | 178230850 | 178231260 | NEIL3      | ENSG00000109674 | 65    | 0.17 | 0.29 | 0.14 | -0.12  | NA |
| chr4 | 3318577   | 3319128   | RGS12      | ENSG00000159788 | -914  | 0.91 | 1    | 0.15 | -0.09  | NA |
| chr4 | 53617118  | 53617607  | AC104066.1 | ENSG00000226887 | 204   | 0.12 | 0.18 | 0.15 | -0.058 | NA |
| chr4 | 57180957  | 57182147  | KIAA1211   | ENSG00000109265 | -1277 | 0.98 | 0.96 | 0.15 | 0.026  | NA |
| chr4 | 85417659  | 85420799  | NKX6-1     | ENSG00000163623 | -1126 | 0.19 | 0.22 | 0.15 | -0.028 | NA |
| chr4 | 90758008  | 90758870  | SNCA       | ENSG00000145335 | -312  | 0.22 | 0.17 | 0.15 | 0.053  | NA |
| chr4 | 120548203 | 120550250 | PDE5A      | ENSG00000138735 | -438  | 0.28 | 0.22 | 0.15 | 0.062  | NA |
| chr4 | 186346794 | 186347571 | UFSP2      | ENSG00000109775 | -98   | 0.21 | 0.28 | 0.15 | -0.066 | NA |
| chr4 | 529166    | 529556    | PIGG       | ENSG00000174227 | -1133 | 0.9  | 0.95 | 0.16 | -0.056 | NA |
| chr4 | 1107125   | 1107728   | RNF212     | ENSG00000178222 | -123  | 0.24 | 0.3  | 0.16 | -0.057 | NA |
| chr4 | 6783872   | 6785283   | KIAA0232   | ENSG00000170871 | 208   | 0.28 | 0.24 | 0.16 | 0.04   | NA |
| chr4 | 41937098  | 41937624  | TMEM33     | ENSG00000109133 | 224   | 0.18 | 0.29 | 0.16 | -0.11  | NA |
| chr4 | 76649538  | 76650457  | G3BP2      | ENSG00000138757 | -438  | 0.21 | 0.15 | 0.16 | 0.062  | NA |
| chr4 | 108910770 | 108911370 | HADH       | ENSG00000138796 | 200   | 0.15 | 0.21 | 0.16 | -0.056 | NA |
| chr4 | 111119187 | 111120084 | ELOVL6     | ENSG00000170522 | -113  | 0.18 | 0.28 | 0.16 | -0.099 | NA |
| chr4 | 2964459   | 2966014   | NOP14      | ENSG00000087269 | -176  | 0.19 | 0.22 | 0.17 | -0.038 | NA |
| chr4 | 15682921  | 15683601  | FBXL5      | ENSG00000118564 | -84   | 0.31 | 0.23 | 0.17 | 0.087  | NA |
| chr4 | 107146    | 107898    | Z95704.3   | ENSG00000250238 | -522  | 0.16 | 0.12 | 0.18 | 0.037  | NA |
| chr4 | 1233872   | 1234420   | CTBP1      | ENSG00000159692 | 1105  | 0.94 | 0.84 | 0.18 | 0.1    | NA |
| chr4 | 26858872  | 26859408  | STIM2      | ENSG00000109689 | -160  | 0.21 | 0.16 | 0.18 | 0.054  | NA |
| chr4 | 103681836 | 103682348 | MANBA      | ENSG00000109323 | -2    | 0.16 | 0.21 | 0.18 | -0.056 | NA |
| chr4 | 118006538 | 118006859 | TRAM1L1    | ENSG00000174599 | 38    | 0.28 | 0.18 | 0.18 | 0.1    | NA |
| chr4 | 141445099 | 141445698 | ELMOD2     | ENSG00000179387 | 86    | 0.19 | 0.14 | 0.18 | 0.053  | NA |
| chr4 | 159689700 | 159690823 | FNIP2      | ENSG00000052795 | -29   | 0.25 | 0.2  | 0.18 | 0.048  | NA |
| chr4 | 1857065   | 1858887   | LETM1      | ENSG00000168924 | -294  | 0.2  | 0.17 | 0.19 | 0.029  | NA |
| chr4 | 39978066  | 39979792  | PDS5A      | ENSG00000121892 | 201   | 0.19 | 0.24 | 0.19 | -0.049 | NA |
| chr4 | 42152766  | 42154984  | BEND4      | ENSG00000188848 | 273   | 0.28 | 0.23 | 0.19 | 0.047  | NA |
| chr4 | 83933332  | 83934370  | LIN54      | ENSG00000189308 | 189   | 0.24 | 0.19 | 0.19 | 0.052  | NA |
| chr4 | 164264821 | 164265772 | NPY5R      | ENSG00000164129 | 205   | 0.23 | 0.19 | 0.19 | 0.041  | NA |
| chr4 | 3956663   | 3958275   | AC226119.2 | ENSG00000251669 | -699  | 0.34 | 0.26 | 0.2  | 0.086  | NA |

|      |           |           |               |                 |      |      |      |      |        |    |
|------|-----------|-----------|---------------|-----------------|------|------|------|------|--------|----|
| chr4 | 41747508  | 41747944  | PHOX2B        | ENSG00000109132 | 1998 | 0.27 | 0.57 | 0.2  | -0.3   | NA |
| chr4 | 99916375  | 99917569  | METAP1        | ENSG00000164024 | 201  | 0.24 | 0.18 | 0.2  | 0.058  | NA |
| chr4 | 185393870 | 185395037 | IRF2          | ENSG00000168310 | 748  | 0.24 | 0.19 | 0.2  | 0.047  | NA |
| chr4 | 798538    | 798984    | CPLX1         | ENSG00000168993 | -65  | 0.95 | 0.9  | 0.21 | 0.057  | NA |
| chr4 | 2845031   | 2846258   | ADD1          | ENSG00000087274 | 60   | 0.2  | 0.15 | 0.21 | 0.048  | NA |
| chr4 | 8429929   | 8430441   | ACOX3         | ENSG00000087008 | 3    | 0.16 | 0.11 | 0.21 | 0.04   | NA |
| chr4 | 113626739 | 113627507 | RP11-148B6.2  | ENSG00000250046 | 843  | 0.15 | 0.27 | 0.21 | -0.12  | NA |
| chr4 | 114900355 | 114900810 | ARSJ          | ENSG00000180801 | 221  | 0.18 | 0.12 | 0.21 | 0.059  | NA |
| chr4 | 170946766 | 170947925 | MFAP3L        | ENSG00000198948 | 101  | 0.21 | 0.17 | 0.21 | 0.034  | NA |
| chr4 | 492839    | 493379    | ZNF721        | ENSG00000182903 | -218 | 0.19 | 0.23 | 0.22 | -0.036 | NA |
| chr4 | 724335    | 726070    | PCGF3         | ENSG00000185619 | 337  | 0.97 | 0.95 | 0.22 | 0.023  | NA |
| chr4 | 4291773   | 4292495   | LYAR          | ENSG00000145220 | -238 | 0.17 | 0.12 | 0.22 | 0.047  | NA |
| chr4 | 26585564  | 26585799  | TBC1D19       | ENSG00000109680 | -25  | 0.32 | 0.21 | 0.22 | 0.1    | NA |
| chr4 | 77818015  | 77819600  | ANKRD56       | ENSG00000186212 | 195  | 0.22 | 0.26 | 0.22 | -0.034 | NA |
| chr4 | 87927928  | 87928667  | AFF1          | ENSG00000172493 | 157  | 0.21 | 0.27 | 0.22 | -0.058 | NA |
| chr4 | 100867328 | 100868162 | DNAJB14       | ENSG00000164031 | -30  | 0.16 | 0.19 | 0.22 | -0.035 | NA |
| chr4 | 151936653 | 151937519 | LRBA          | ENSG00000198589 | -207 | 0.14 | 0.23 | 0.22 | -0.09  | NA |
| chr4 | 154386834 | 154388183 | KIAA0922      | ENSG00000121210 | 10   | 0.24 | 0.21 | 0.22 | 0.038  | NA |
| chr4 | 6675691   | 6676407   | RP11-539L10.3 | ENSG00000251580 | -492 | 0.18 | 0.09 | 0.23 | 0.084  | NA |
| chr4 | 17616175  | 17616506  | AC006160.5    | ENSG00000249502 | -146 | 0.27 | 0.18 | 0.23 | 0.089  | NA |
| chr4 | 57975860  | 57976916  | RP11-12A1.1   | ENSG00000245067 | 460  | 0.24 | 0.19 | 0.23 | 0.054  | NA |
| chr4 | 68566603  | 68567076  | UBA6          | ENSG00000033178 | 21   | 0.24 | 0.19 | 0.23 | 0.054  | NA |
| chr4 | 74903953  | 74904589  | CXCL3         | ENSG00000163734 | 96   | 0.25 | 0.14 | 0.23 | 0.11   | NA |
| chr4 | 76555366  | 76556079  | CDKL2         | ENSG00000138769 | -52  | 0.5  | 0.23 | 0.23 | 0.27   | NA |
| chr4 | 570950    | 571768    | AC116565.1    | ENSG00000256961 | 402  | 0.24 | 0.36 | 0.24 | -0.12  | NA |
| chr4 | 647193    | 647449    | PDE6B         | ENSG00000133256 | 321  | 0.81 | 0.7  | 0.24 | 0.11   | NA |
| chr4 | 898030    | 898532    | GAK           | ENSG00000178950 | 288  | 0.94 | 0.99 | 0.24 | -0.046 | NA |
| chr4 | 3076186   | 3076558   | RP11-520M5.6  | ENSG00000251075 | -131 | 0.2  | 0.14 | 0.24 | 0.052  | NA |
| chr4 | 41215871  | 41216813  | APBB2         | ENSG00000163697 | 133  | 0.23 | 0.19 | 0.24 | 0.042  | NA |
| chr4 | 22516856  | 22518048  | GPR125        | ENSG00000152990 | -133 | 0.21 | 0.25 | 0.25 | -0.039 | NA |

|      |           |           |               |                  |      |      |      |      |        |    |
|------|-----------|-----------|---------------|------------------|------|------|------|------|--------|----|
| chr4 | 41992477  | 41993125  | SLC30A9       | ENSG00000014824  | 312  | 0.16 | 0.12 | 0.25 | 0.041  | NA |
| chr4 | 55094321  | 55094593  | PDGFRA        | ENSG000000134853 | -807 | 0.32 | 0.17 | 0.25 | 0.15   | NA |
| chr4 | 55096185  | 55100331  | PDGFRA        | ENSG000000134853 | 1769 | 0.24 | 0.21 | 0.25 | 0.021  | NA |
| chr4 | 74124405  | 74125130  | ANKRD17       | ENSG000000132466 | -265 | 0.26 | 0.32 | 0.25 | -0.057 | NA |
| chr4 | 77507077  | 77507339  | SHROOM3       | ENSG000000138771 | -85  | 0.26 | 0.34 | 0.25 | -0.083 | NA |
| chr4 | 101111146 | 101111497 | RP11-588P8.1  | ENSG000000249710 | 131  | 0.18 | 0.12 | 0.25 | 0.061  | NA |
| chr4 | 154388274 | 154388615 | KIAA0922      | ENSG000000121210 | 943  | 0.3  | 0.17 | 0.25 | 0.12   | NA |
| chr4 | 156129168 | 156130209 | RP11-92A5.2   | ENSG000000250538 | -105 | 0.15 | 0.19 | 0.25 | -0.046 | NA |
| chr4 | 160023787 | 160025437 | RAPGEF2       | ENSG000000109756 | -718 | 0.23 | 0.19 | 0.25 | 0.042  | NA |
| chr4 | 171010943 | 171011503 | AADAT         | ENSG000000109576 | -105 | 0.17 | 0.22 | 0.25 | -0.049 | NA |
| chr4 | 77134566  | 77135377  | SCARB2        | ENSG000000138760 | -218 | 0.17 | 0.13 | 0.26 | 0.039  | NA |
| chr4 | 77172587  | 77173060  | FAM47E        | ENSG000000189157 | -30  | 0.28 | 0.21 | 0.26 | 0.069  | NA |
| chr4 | 79472806  | 79473177  | ANXA3         | ENSG000000138772 | 90   | 0.14 | 0.21 | 0.26 | -0.063 | NA |
| chr4 | 152682041 | 152682293 | PET112        | ENSG000000059691 | -85  | 0.24 | 0.1  | 0.26 | 0.14   | NA |
| chr4 | 157892685 | 157893286 | PDGFC         | ENSG000000145431 | -439 | 0.3  | 0.24 | 0.26 | 0.059  | NA |
| chr4 | 25378793  | 25379275  | ANAPC4        | ENSG000000053900 | 199  | 0.18 | 0.22 | 0.27 | -0.039 | NA |
| chr4 | 39046186  | 39046924  | KLHL5         | ENSG000000109790 | 104  | 0.32 | 0.24 | 0.27 | 0.077  | NA |
| chr4 | 78739707  | 78741555  | CNOT6L        | ENSG000000138767 | -414 | 0.22 | 0.19 | 0.27 | 0.032  | NA |
| chr4 | 110354464 | 110355110 | RP11-264J9.1  | ENSG000000247950 | 133  | 0.24 | 0.19 | 0.27 | 0.052  | NA |
| chr4 | 3767072   | 3769789   | ADRA2C        | ENSG000000184160 | 355  | 0.29 | 0.31 | 0.28 | -0.022 | NA |
| chr4 | 11430235  | 11431256  | HS3ST1        | ENSG000000002587 | 443  | 0.24 | 0.2  | 0.28 | 0.046  | NA |
| chr4 | 39772810  | 39773309  | ZBTB12B       | ENSG000000180610 | -68  | 0.95 | 0.98 | 0.28 | -0.026 | NA |
| chr4 | 77227354  | 77228482  | STBD1         | ENSG000000118804 | 739  | 0.2  | 0.17 | 0.28 | 0.032  | NA |
| chr4 | 128801886 | 128802696 | PLK4          | ENSG000000142731 | 275  | 0.19 | 0.25 | 0.28 | -0.056 | NA |
| chr4 | 154680774 | 154681377 | RNF175        | ENSG000000145428 | -50  | 0.24 | 0.17 | 0.28 | 0.063  | NA |
| chr4 | 169239549 | 169239824 | DDX60         | ENSG000000137628 | 269  | 0.3  | 0.37 | 0.28 | -0.069 | NA |
| chr4 | 1224451   | 1224728   | CTBP1         | ENSG000000159692 | 343  | 0.99 | 0.92 | 0.29 | 0.072  | NA |
| chr4 | 9692917   | 9693603   | RP11-180A12.3 | ENSG000000186234 | -859 | 0.23 | 0.33 | 0.29 | -0.099 | NA |
| chr4 | 25161781  | 25162290  | SEPSECS       | ENSG000000109618 | -19  | 0.32 | 0.21 | 0.29 | 0.11   | NA |
| chr4 | 38664649  | 38666531  | KLF3          | ENSG000000109787 | -227 | 0.18 | 0.15 | 0.29 | 0.024  | NA |

|      |           |           |               |                 |       |      |      |      |        |    |
|------|-----------|-----------|---------------|-----------------|-------|------|------|------|--------|----|
| chr4 | 77069066  | 77069672  | NUP54         | ENSG00000138750 | -16   | 0.15 | 0.2  | 0.29 | -0.049 | NA |
| chr4 | 84205381  | 84206020  | COQ2          | ENSG00000173085 | 218   | 0.3  | 0.18 | 0.29 | 0.11   | NA |
| chr4 | 57253468  | 57253745  | AASDH         | ENSG00000157426 | -17   | 0.24 | 0.2  | 0.3  | 0.047  | NA |
| chr4 | 74734918  | 74735544  | CXCL1         | ENSG00000163739 | 121   | 0.25 | 0.2  | 0.3  | 0.052  | NA |
| chr4 | 144620822 | 144622218 | RP13-578N3.3  | ENSG00000246448 | 110   | 0.22 | 0.18 | 0.3  | 0.039  | NA |
| chr4 | 154709512 | 154710827 | SFRP2         | ENSG00000145423 | 103   | 0.25 | 0.21 | 0.3  | 0.037  | NA |
| chr4 | 158558911 | 158559184 | RP11-364P22.2 | ENSG00000249275 | 208   | 1    | 0.95 | 0.3  | 0.045  | NA |
| chr4 | 170541251 | 170541810 | CLCN3         | ENSG00000109572 | -142  | 0.18 | 0.22 | 0.3  | -0.038 | NA |
| chr4 | 980603    | 981248    | DGKQ          | ENSG00000145214 | -242  | 0.15 | 0.18 | 0.31 | -0.035 | NA |
| chr4 | 57687610  | 57687906  | SPINK2        | ENSG00000128040 | 102   | 0.17 | 0.12 | 0.31 | 0.046  | NA |
| chr4 | 57844857  | 57845202  | C4orf14       | ENSG00000084092 | -40   | 0.27 | 0.41 | 0.31 | -0.14  | NA |
| chr4 | 68410993  | 68411492  | CENPC1        | ENSG00000145241 | -41   | 0.18 | 0.13 | 0.31 | 0.046  | NA |
| chr4 | 77996421  | 77997571  | CCNI          | ENSG00000118816 | -511  | 0.21 | 0.25 | 0.31 | -0.038 | NA |
| chr4 | 79860213  | 79860745  | PAQR3         | ENSG00000163291 | -130  | 0.28 | 0.23 | 0.31 | 0.051  | NA |
| chr4 | 1656735   | 1657315   | FAM53A        | ENSG00000174137 | 110   | 0.97 | 0.94 | 0.32 | 0.026  | NA |
| chr4 | 21950538  | 21950865  | RP11-17E2.2   | ENSG00000250039 | 63    | 0.28 | 0.35 | 0.32 | -0.073 | NA |
| chr4 | 54243642  | 54244397  | FIP1L1        | ENSG00000145216 | 209   | 0.19 | 0.15 | 0.32 | 0.042  | NA |
| chr4 | 140476381 | 140478628 | SETD7         | ENSG00000145391 | -142  | 0.19 | 0.17 | 0.32 | 0.025  | NA |
| chr4 | 568513    | 570488    | AC116565.1    | ENSG00000256961 | -1457 | 0.21 | 0.23 | 0.33 | -0.021 | NA |
| chr4 | 47034427  | 47034940  | GABRB1        | ENSG00000163288 | 1033  | 0.23 | 0.3  | 0.33 | -0.075 | NA |
| chr4 | 129208297 | 129209780 | PGRMC2        | ENSG00000164040 | -495  | 0.16 | 0.19 | 0.33 | -0.028 | NA |
| chr4 | 188916605 | 188916876 | ZFP42         | ENSG00000179059 | -185  | 0.25 | 0.3  | 0.33 | -0.045 | NA |
| chr4 | 17513309  | 17513981  | QDPR          | ENSG00000151552 | -41   | 0.29 | 0.24 | 0.34 | 0.048  | NA |
| chr4 | 80993375  | 80994410  | ANTXR2        | ENSG00000163297 | -175  | 0.19 | 0.22 | 0.34 | -0.029 | NA |
| chr4 | 99579142  | 99580160  | TSPAN5        | ENSG00000168785 | -302  | 0.18 | 0.22 | 0.34 | -0.039 | NA |
| chr4 | 122871412 | 122873182 | TRPC3         | ENSG00000138741 | -268  | 0.19 | 0.16 | 0.34 | 0.027  | NA |
| chr4 | 175443406 | 175443837 | HPGD          | ENSG00000164120 | -137  | 0.24 | 0.15 | 0.34 | 0.084  | NA |
| chr4 | 189552385 | 189552791 | RP11-756P10.1 | ENSG00000250523 | 510   | 0.98 | 1    | 0.34 | -0.012 | NA |
| chr4 | 3250627   | 3251447   | C4orf44       | ENSG00000188981 | 270   | 0.96 | 0.98 | 0.35 | -0.022 | NA |
| chr4 | 3293714   | 3294595   | RGS12         | ENSG00000159788 | -601  | 0.24 | 0.21 | 0.35 | 0.032  | NA |

|      |           |           |              |                 |       |      |      |      |        |    |
|------|-----------|-----------|--------------|-----------------|-------|------|------|------|--------|----|
| chr4 | 4543437   | 4544104   | STX18        | ENSG00000168818 | -33   | 0.2  | 0.24 | 0.35 | -0.036 | NA |
| chr4 | 82135888  | 82136535  | PRKG2        | ENSG00000138669 | -23   | 0.17 | 0.2  | 0.35 | -0.035 | NA |
| chr4 | 82965415  | 82965896  | RP11-689K5.3 | ENSG00000251331 | -258  | 0.15 | 0.2  | 0.35 | -0.046 | NA |
| chr4 | 185654505 | 185655515 | MLF1IP       | ENSG00000151725 | -442  | 0.21 | 0.18 | 0.35 | 0.027  | NA |
| chr4 | 189080848 | 189081247 | RP11-366H4.1 | ENSG00000248370 | -172  | 0.96 | 1    | 0.35 | -0.043 | NA |
| chr4 | 1987492   | 1988260   | MIR943       | ENSG00000216105 | 328   | 0.9  | 0.94 | 0.36 | -0.035 | NA |
| chr4 | 109571693 | 109572039 | OSTC         | ENSG00000198856 | 126   | 0.21 | 0.17 | 0.36 | 0.039  | NA |
| chr4 | 140216727 | 140217078 | NDUFC1       | ENSG00000109390 | 55    | 0.21 | 0.26 | 0.36 | -0.049 | NA |
| chr4 | 190939801 | 190940591 | 5S_rRNA      | ENSG00000201145 | 1345  | 0.53 | 0.47 | 0.36 | 0.065  | NA |
| chr4 | 79696707  | 79697958  | BMP2K        | ENSG00000138756 | -164  | 0.2  | 0.23 | 0.37 | -0.033 | NA |
| chr4 | 108640845 | 108641835 | PAPSS1       | ENSG00000138801 | -161  | 0.26 | 0.21 | 0.37 | 0.043  | NA |
| chr4 | 108852495 | 108853387 | CYP2U1       | ENSG00000155016 | 416   | 0.15 | 0.19 | 0.37 | -0.036 | NA |
| chr4 | 110623959 | 110624831 | CASP6        | ENSG00000138794 | -390  | 0.27 | 0.23 | 0.37 | 0.032  | NA |
| chr4 | 128702830 | 128704215 | HSPA4L       | ENSG00000164070 | 546   | 0.24 | 0.21 | 0.37 | 0.029  | NA |
| chr4 | 185569961 | 185570638 | CASP3        | ENSG00000164305 | 302   | 0.28 | 0.22 | 0.37 | 0.053  | NA |
| chr4 | 7043808   | 7045732   | CCDC96       | ENSG00000173013 | -42   | 0.22 | 0.2  | 0.38 | 0.021  | NA |
| chr4 | 25657119  | 25657547  | SLC34A2      | ENSG00000157765 | -111  | 0.22 | 0.17 | 0.38 | 0.052  | NA |
| chr4 | 156874740 | 156875083 | CTSO         | ENSG00000151792 | 158   | 0.18 | 0.23 | 0.38 | -0.048 | NA |
| chr4 | 1801121   | 1801327   | FGFR3        | ENSG00000068078 | -1965 | 0.9  | 0.94 | 0.39 | -0.048 | NA |
| chr4 | 2935461   | 2936974   | MFSD10       | ENSG00000109736 | -543  | 0.21 | 0.24 | 0.39 | -0.034 | NA |
| chr4 | 26321133  | 26323150  | RBPJ         | ENSG00000168214 | 857   | 0.23 | 0.19 | 0.39 | 0.042  | NA |
| chr4 | 76861089  | 76862426  | NAAA         | ENSG00000138744 | -380  | 0.17 | 0.15 | 0.39 | 0.023  | NA |
| chr4 | 81118137  | 81118603  | PRDM8        | ENSG00000152784 | -288  | 0.34 | 0.25 | 0.39 | 0.094  | NA |
| chr4 | 128544031 | 128544903 | INTU         | ENSG00000164066 | 41    | 0.31 | 0.26 | 0.39 | 0.05   | NA |
| chr4 | 6564751   | 6565185   | PPP2R2C      | ENSG00000074211 | 359   | 0.22 | 0.19 | 0.4  | 0.032  | NA |
| chr4 | 73434855  | 73435321  | ADAMTS3      | ENSG00000156140 | -572  | 0.24 | 0.2  | 0.4  | 0.039  | NA |
| chr4 | 141294666 | 141295274 | SCOC         | ENSG00000153130 | 280   | 0.2  | 0.16 | 0.4  | 0.041  | NA |
| chr4 | 159592617 | 159593587 | C4orf46      | ENSG00000205208 | -58   | 0.16 | 0.2  | 0.4  | -0.045 | NA |
| chr4 | 667273    | 667601    | ATP5I        | ENSG00000169020 | -125  | 1    | 0.56 | 0.41 | 0.44   | NA |
| chr4 | 2933644   | 2933879   | MFSD10       | ENSG00000109736 | -98   | 0.72 | 0.59 | 0.41 | 0.12   | NA |

|      |           |           |               |                 |      |      |      |      |        |    |
|------|-----------|-----------|---------------|-----------------|------|------|------|------|--------|----|
| chr4 | 668051    | 668726    | ATP5I         | ENSG00000169020 | -269 | 0.34 | 0.27 | 0.42 | 0.063  | NA |
| chr4 | 37687401  | 37688613  | RELL1         | ENSG00000181826 | -9   | 0.19 | 0.22 | 0.42 | -0.028 | NA |
| chr4 | 48781331  | 48782339  | FRYL          | ENSG00000075539 | 311  | 0.21 | 0.17 | 0.42 | 0.035  | NA |
| chr4 | 81257040  | 81257270  | C4orf22       | ENSG00000197826 | 220  | 0.67 | 0.39 | 0.42 | 0.27   | NA |
| chr4 | 120133564 | 120134289 | RP11-455G16.1 | ENSG00000178636 | -259 | 0.22 | 0.17 | 0.42 | 0.046  | NA |
| chr4 | 159131508 | 159131736 | TMEM144       | ENSG00000164124 | 11   | 0.5  | 0.2  | 0.42 | 0.3    | NA |
| chr4 | 5889203   | 5890645   | CRMP1         | ENSG00000072832 | -384 | 0.18 | 0.2  | 0.43 | -0.027 | NA |
| chr4 | 5894071   | 5895116   | CRMP1         | ENSG00000072832 | 192  | 0.16 | 0.18 | 0.43 | -0.019 | NA |
| chr4 | 46391903  | 46392572  | GABRA2        | ENSG00000151834 | -292 | 0.17 | 0.15 | 0.43 | 0.023  | NA |
| chr4 | 49526390  | 49526686  | RP11-241F15.5 | ENSG00000248532 | -644 | 0.48 | 0.52 | 0.43 | -0.041 | NA |
| chr4 | 89079756  | 89080454  | ABCG2         | ENSG00000118777 | -282 | 0.19 | 0.16 | 0.43 | 0.029  | NA |
| chr4 | 96469859  | 96470994  | UNC5C         | ENSG00000182168 | -303 | 0.22 | 0.26 | 0.43 | -0.033 | NA |
| chr4 | 186130584 | 186131896 | KIAA1430      | ENSG00000164323 | -582 | 0.25 | 0.22 | 0.43 | 0.03   | NA |
| chr4 | 1794442   | 1797132   | FGFR3         | ENSG00000068078 | 753  | 0.22 | 0.2  | 0.44 | 0.017  | NA |
| chr4 | 15779998  | 15780729  | CD38          | ENSG00000004468 | 428  | 0.15 | 0.18 | 0.44 | -0.032 | NA |
| chr4 | 48908292  | 48908850  | OCIAD2        | ENSG00000145247 | 173  | 0.21 | 0.17 | 0.44 | 0.04   | NA |
| chr4 | 175750330 | 175750584 | GLRA3         | ENSG00000145451 | -79  | 0.37 | 0.14 | 0.44 | 0.23   | NA |
| chr4 | 4249766   | 4250270   | TMEM128       | ENSG00000132406 | -79  | 0.14 | 0.18 | 0.45 | -0.037 | NA |
| chr4 | 41258759  | 41259867  | UCHL1         | ENSG00000154277 | 527  | 0.22 | 0.19 | 0.45 | 0.035  | NA |
| chr4 | 56719704  | 56720228  | EXOC1         | ENSG00000090989 | 184  | 0.27 | 0.23 | 0.45 | 0.038  | NA |
| chr4 | 87855873  | 87857204  | C4orf36       | ENSG00000163633 | -654 | 0.22 | 0.2  | 0.45 | 0.018  | NA |
| chr4 | 102267592 | 102269621 | PPP3CA        | ENSG00000138814 | -653 | 0.15 | 0.14 | 0.45 | 0.019  | NA |
| chr4 | 866098    | 866344    | GAK           | ENSG00000178950 | 340  | 0.93 | 1    | 0.46 | -0.066 | NA |
| chr4 | 56501912  | 56502523  | NMU           | ENSG00000109255 | 209  | 0.22 | 0.16 | 0.46 | 0.059  | NA |
| chr4 | 75023577  | 75024037  | MTHFD2L       | ENSG00000163738 | -18  | 0.35 | 0.29 | 0.46 | 0.054  | NA |
| chr4 | 87813172  | 87813718  | C4orf36       | ENSG00000163633 | 28   | 0.21 | 0.27 | 0.46 | -0.057 | NA |
| chr4 | 103747631 | 103749392 | UBE2D3        | ENSG00000109332 | -487 | 0.25 | 0.28 | 0.46 | -0.032 | NA |
| chr4 | 117520431 | 117520720 | RP11-55L3.2   | ENSG00000213493 | 1258 | 1    | 0.98 | 0.46 | 0.023  | NA |
| chr4 | 645236    | 645579    | PDE6B         | ENSG00000133256 | 59   | 0.26 | 0.32 | 0.47 | -0.065 | NA |
| chr4 | 680047    | 680366    | MFSD7         | ENSG00000169026 | 908  | 0.91 | 0.94 | 0.47 | -0.032 | NA |

|      |           |           |               |                 |      |      |      |      |        |    |
|------|-----------|-----------|---------------|-----------------|------|------|------|------|--------|----|
| chr4 | 1188185   | 1189162   | SPON2         | ENSG00000159674 | 249  | 0.31 | 0.34 | 0.47 | -0.031 | NA |
| chr4 | 53578358  | 53579238  | KIAA0114      | ENSG00000226950 | 201  | 0.23 | 0.2  | 0.47 | 0.034  | NA |
| chr4 | 106629575 | 106630214 | INTS12        | ENSG00000138785 | -98  | 0.33 | 0.41 | 0.47 | -0.082 | NA |
| chr4 | 130014349 | 130014899 | C4orf33       | ENSG00000151470 | 152  | 0.2  | 1    | 0.47 | -0.8   | NA |
| chr4 | 139482528 | 139483255 | RP11-173E2.1  | ENSG00000248795 | 1033 | 0.98 | 0.94 | 0.47 | 0.043  | NA |
| chr4 | 961347    | 962155    | DGKQ          | ENSG00000145214 | -788 | 0.44 | 0.48 | 0.48 | -0.037 | NA |
| chr4 | 1806488   | 1806696   | FGFR3         | ENSG00000068078 | 373  | 0.9  | 0.93 | 0.48 | -0.034 | NA |
| chr4 | 40751842  | 40752493  | NSUN7         | ENSG00000179299 | 253  | 0.21 | 0.18 | 0.48 | 0.03   | NA |
| chr4 | 153456108 | 153457843 | FBXW7         | ENSG00000109670 | -803 | 0.23 | 0.26 | 0.48 | -0.03  | NA |
| chr4 | 154265607 | 154266394 | MND1          | ENSG00000121211 | 199  | 0.18 | 0.15 | 0.48 | 0.032  | NA |
| chr4 | 330162    | 332068    | RP11-478C6.1  | ENSG00000251535 | -540 | 0.2  | 0.23 | 0.49 | -0.029 | NA |
| chr4 | 3464799   | 3465440   | DOK7          | ENSG00000175920 | 86   | 0.33 | 0.4  | 0.49 | -0.074 | NA |
| chr4 | 123843362 | 123843795 | NUDT6         | ENSG00000170917 | 19   | 0.21 | 0.25 | 0.49 | -0.04  | NA |
| chr4 | 140222426 | 140223335 | NDUFC1        | ENSG00000109390 | -306 | 0.23 | 0.21 | 0.49 | 0.02   | NA |
| chr4 | 84376666  | 84377237  | HELQ          | ENSG00000163312 | 6    | 0.23 | 0.32 | 0.5  | -0.088 | NA |
| chr4 | 85503546  | 85504893  | CDS1          | ENSG00000163624 | 87   | 0.21 | 0.18 | 0.5  | 0.025  | NA |
| chr4 | 106394551 | 106395322 | PPA2          | ENSG00000138777 | -70  | 0.25 | 0.21 | 0.5  | 0.046  | NA |
| chr4 | 1713267   | 1714980   | SLBP          | ENSG00000163950 | -378 | 0.2  | 0.18 | 0.51 | 0.019  | NA |
| chr4 | 1807801   | 1808059   | FGFR3         | ENSG00000068078 | -913 | 0.93 | 1    | 0.51 | -0.068 | NA |
| chr4 | 71704664  | 71705736  | GRSF1         | ENSG00000132463 | -482 | 0.23 | 0.21 | 0.52 | 0.026  | NA |
| chr4 | 119199620 | 119200193 | SNHG8         | ENSG00000246493 | -8   | 0.22 | 0.26 | 0.52 | -0.035 | NA |
| chr4 | 134069162 | 134070442 | RP11-9G1.3    | ENSG00000250241 | 466  | 0.35 | 0.4  | 0.52 | -0.052 | NA |
| chr4 | 152020470 | 152021110 | RPS3A         | ENSG00000145425 | 65   | 0.12 | 0.25 | 0.52 | -0.12  | NA |
| chr4 | 186064047 | 186064614 | SLC25A4       | ENSG00000151729 | -65  | 0.19 | 0.21 | 0.52 | -0.024 | NA |
| chr4 | 4228099   | 4229839   | OTOP1         | ENSG00000163982 | -353 | 0.24 | 0.27 | 0.53 | -0.022 | NA |
| chr4 | 142141971 | 142142359 | ZNF330        | ENSG00000109445 | 124  | 0.32 | 0.22 | 0.53 | 0.094  | NA |
| chr4 | 146402870 | 146403983 | SMAD1         | ENSG00000170365 | 482  | 0.22 | 0.2  | 0.53 | 0.022  | NA |
| chr4 | 189027609 | 189028033 | RP11-713C19.1 | ENSG00000241011 | 109  | 0.98 | 0.96 | 0.53 | 0.014  | NA |
| chr4 | 83931642  | 83932194  | LIN54         | ENSG00000189308 | -56  | 0.23 | 0.26 | 0.54 | -0.028 | NA |
| chr4 | 128651419 | 128651977 | SLC25A31      | ENSG00000151475 | 165  | 0.98 | 0.97 | 0.54 | 0.0098 | NA |

|      |           |           |                 |                 |       |      |      |      |        |    |
|------|-----------|-----------|-----------------|-----------------|-------|------|------|------|--------|----|
| chr4 | 108745829 | 108746535 | SGMS2           | ENSG00000164023 | 144   | 0.17 | 0.19 | 0.55 | -0.022 | NA |
| chr4 | 140097251 | 140099836 | ELF2            | ENSG00000109381 | -190  | 0.21 | 0.22 | 0.55 | -0.016 | NA |
| chr4 | 156588297 | 156589292 | GUCY1A3         | ENSG00000164116 | 444   | 0.15 | 0.17 | 0.55 | -0.022 | NA |
| chr4 | 169401350 | 169401725 | DDX60L          | ENSG00000181381 | -88   | 0.14 | 0.19 | 0.55 | -0.045 | NA |
| chr4 | 775071    | 775963    | RP11-440L14.1   | ENSG00000249592 | 101   | 0.29 | 0.25 | 0.56 | 0.044  | NA |
| chr4 | 144258862 | 144259087 | AC097658.1      | ENSG00000178972 | -4    | 0.3  | 0.36 | 0.56 | -0.059 | NA |
| chr4 | 166033368 | 166034212 | TMEM192         | ENSG00000170088 | 216   | 0.17 | 0.15 | 0.57 | 0.017  | NA |
| chr4 | 5709985   | 5710495   | EVC2            | ENSG00000173040 | 54    | 0.16 | 0.19 | 0.58 | -0.032 | NA |
| chr4 | 132898749 | 132899190 | RP11-745L13.2   | ENSG00000251555 | -1862 | 0.98 | 0.95 | 0.58 | 0.027  | NA |
| chr4 | 139936443 | 139937428 | CCRN4L          | ENSG00000151014 | -8    | 0.14 | 0.16 | 0.58 | -0.016 | NA |
| chr4 | 174291879 | 174293273 | SAP30           | ENSG00000164105 | 482   | 0.18 | 0.17 | 0.58 | 0.016  | NA |
| chr4 | 176986921 | 176987360 | WDR17           | ENSG00000150627 | 155   | 0.23 | 0.16 | 0.58 | 0.071  | NA |
| chr4 | 7194537   | 7195467   | SORCS2          | ENSG00000184985 | 737   | 0.26 | 0.29 | 0.59 | -0.027 | NA |
| chr4 | 48485362  | 48486473  | SLC10A4         | ENSG00000145248 | 557   | 0.18 | 0.16 | 0.59 | 0.021  | NA |
| chr4 | 73934944  | 73935650  | COX18           | ENSG00000163626 | 112   | 0.24 | 0.27 | 0.59 | -0.026 | NA |
| chr4 | 87515183  | 87515735  | MAPK10          | ENSG00000109339 | -196  | 0.17 | 0.19 | 0.59 | -0.023 | NA |
| chr4 | 5053230   | 5054092   | STK32B          | ENSG00000152953 | 338   | 0.17 | 0.15 | 0.6  | 0.023  | NA |
| chr4 | 124426780 | 124427157 | RP11-381N20.1   | ENSG00000251526 | 534   | 0.27 | 0.25 | 0.6  | 0.022  | NA |
| chr4 | 1322394   | 1322875   | MAEA            | ENSG00000090316 | -211  | 0.95 | 0.93 | 0.61 | 0.022  | NA |
| chr4 | 75858300  | 75859931  | PARM1           | ENSG00000169116 | 810   | 0.21 | 0.22 | 0.61 | -0.019 | NA |
| chr4 | 85886808  | 85887777  | WDFY3           | ENSG00000163625 | 211   | 0.25 | 0.23 | 0.61 | 0.021  | NA |
| chr4 | 185395838 | 185396181 | IRF2            | ENSG00000168310 | -275  | 0.26 | 0.32 | 0.61 | -0.064 | NA |
| chr4 | 1241412   | 1244111   | CTBP1           | ENSG00000159692 | -233  | 0.2  | 0.19 | 0.62 | 0.012  | NA |
| chr4 | 9382728   | 9383135   | AC108519.1      | ENSG00000226350 | 190   | 0.59 | 0.65 | 0.62 | -0.059 | NA |
| chr4 | 25032028  | 25032311  | LGI2            | ENSG00000153012 | 118   | 0.15 | 0.18 | 0.62 | -0.033 | NA |
| chr4 | 66535193  | 66535620  | EPHA5           | ENSG00000145242 | 247   | 0.25 | 0.29 | 0.62 | -0.038 | NA |
| chr4 | 90031904  | 90033005  | FAM13A          | ENSG00000138640 | 95    | 0.19 | 0.18 | 0.62 | 0.017  | NA |
| chr4 | 170191357 | 170192844 | SH3RF1          | ENSG00000154447 | -100  | 0.23 | 0.25 | 0.62 | -0.014 | NA |
| chr4 | 106067473 | 106067968 | TET2            | ENSG00000168769 | -223  | 0.2  | 0.17 | 0.63 | 0.03   | NA |
| chr4 | 9495305   | 9495506   | RP11-1396O13.20 | ENSG00000251624 | 25    | 0.83 | 0.73 | 0.64 | 0.1    | NA |



|      |           |           |               |                  |       |      |      |      |        |    |
|------|-----------|-----------|---------------|------------------|-------|------|------|------|--------|----|
| chr4 | 82392610  | 82393426  | RASGEF1B      | ENSG00000138670  | 26    | 0.17 | 0.19 | 0.64 | -0.019 | NA |
| chr4 | 110736868 | 110737128 | GAR1          | ENSG00000109534  | 14    | 0.44 | 0.25 | 0.64 | 0.19   | NA |
| chr4 | 39367648  | 39368213  | RFC1          | ENSG00000035928  | 25    | 0.37 | 0.4  | 0.65 | -0.037 | NA |
| chr4 | 170948486 | 170948908 | MFAP3L        | ENSG00000198948  | -336  | 0.31 | 0.29 | 0.65 | 0.026  | NA |
| chr4 | 99849305  | 99850552  | EIF4E         | ENSG00000151247  | 315   | 0.16 | 0.14 | 0.66 | 0.018  | NA |
| chr4 | 147443091 | 147444062 | SLC10A7       | ENSG00000120519  | -460  | 0.3  | 0.27 | 0.66 | 0.026  | NA |
| chr4 | 13548570  | 13549956  | AC006445.8    | ENSG000000246095 | -675  | 0.23 | 0.22 | 0.67 | 0.013  | NA |
| chr4 | 144256931 | 144258527 | GAB1          | ENSG00000109458  | -186  | 0.22 | 0.23 | 0.67 | -0.014 | NA |
| chr4 | 121843148 | 121844193 | PRDM5         | ENSG00000138738  | 166   | 0.29 | 0.27 | 0.68 | 0.02   | NA |
| chr4 | 183838036 | 183839286 | DCTD          | ENSG00000129187  | -612  | 0.2  | 0.18 | 0.68 | 0.017  | NA |
| chr4 | 786118    | 786341    | CPLX1         | ENSG00000168993  | 251   | 0.31 | 0.42 | 0.69 | -0.11  | NA |
| chr4 | 2243251   | 2244007   | POLN          | ENSG00000130997  | 219   | 0.18 | 0.11 | 0.69 | 0.066  | NA |
| chr4 | 3485963   | 3486381   | DOK7          | ENSG00000175920  | -99   | 0.3  | 0.28 | 0.69 | 0.025  | NA |
| chr4 | 74964656  | 74965279  | CXCL2         | ENSG00000081041  | -55   | 0.22 | 0.2  | 0.69 | 0.019  | NA |
| chr4 | 91048411  | 91049682  | FAM190A       | ENSG00000184305  | 360   | 0.21 | 0.19 | 0.69 | 0.019  | NA |
| chr4 | 158141404 | 158141836 | GRIA2         | ENSG00000120251  | -200  | 0.16 | 0.19 | 0.69 | -0.022 | NA |
| chr4 | 48832807  | 48833569  | OCIAD1        | ENSG00000109180  | 173   | 0.29 | 0.24 | 0.7  | 0.044  | NA |
| chr4 | 73433783  | 73434289  | ADAMTS3       | ENSG00000156140  | -274  | 0.15 | 0.13 | 0.7  | 0.019  | NA |
| chr4 | 172733734 | 172735118 | GALNTL6       | ENSG00000174473  | -228  | 0.21 | 0.22 | 0.7  | -0.015 | NA |
| chr4 | 83811958  | 83812708  | SEC31A        | ENSG00000138674  | -162  | 0.19 | 0.18 | 0.71 | 0.013  | NA |
| chr4 | 122791200 | 122791835 | BBS7          | ENSG00000138686  | 88    | 0.23 | 0.19 | 0.71 | 0.04   | NA |
| chr4 | 144480541 | 144480947 | AC139713.1    | ENSG000000236296 | 119   | 0.33 | 0.3  | 0.71 | 0.031  | NA |
| chr4 | 152329824 | 152330873 | RP11-610P16.1 | ENSG000000251611 | -361  | 0.21 | 0.19 | 0.71 | 0.014  | NA |
| chr4 | 7056020   | 7056581   | TADA2B        | ENSG00000173011  | 1220  | 0.95 | 0.96 | 0.72 | -0.011 | NA |
| chr4 | 2819499   | 2820429   | SH3BP2        | ENSG00000087266  | 52    | 0.19 | 0.18 | 0.73 | 0.015  | NA |
| chr4 | 166248454 | 166249063 | SC4MOL        | ENSG00000052802  | -17   | 0.21 | 0.19 | 0.73 | 0.017  | NA |
| chr4 | 40752691  | 40752896  | NSUN7         | ENSG00000179299  | 812   | 0.39 | 0.32 | 0.74 | 0.071  | NA |
| chr4 | 41883492  | 41884570  | RP11-457P14.4 | ENSG000000245870 | -171  | 0.18 | 0.17 | 0.74 | 0.0097 | NA |
| chr4 | 146100754 | 146102055 | OTUD4         | ENSG00000164164  | -641  | 0.18 | 0.17 | 0.74 | 0.0086 | NA |
| chr4 | 187810427 | 187810735 | RP11-11N5.1   | ENSG000000250829 | -1850 | 0.95 | 0.96 | 0.75 | -0.017 | NA |

|      |           |           |                |                 |      |      |      |      |         |    |
|------|-----------|-----------|----------------|-----------------|------|------|------|------|---------|----|
| chr4 | 100870377 | 100871994 | RP11-15B17.1   | ENSG00000245322 | 22   | 0.21 | 0.22 | 0.76 | -0.013  | NA |
| chr4 | 124332    | 124841    | ZNF718         | ENSG00000250312 | 200  | 0.24 | 0.26 | 0.77 | -0.022  | NA |
| chr4 | 78978365  | 78979256  | FRAS1          | ENSG00000138759 | 86   | 0.22 | 0.24 | 0.77 | -0.014  | NA |
| chr4 | 78980042  | 78980410  | FRAS1          | ENSG00000138759 | 1092 | 0.32 | 0.38 | 0.77 | -0.064  | NA |
| chr4 | 95372801  | 95373535  | PDLIM5         | ENSG00000163110 | 131  | 0.18 | 0.2  | 0.77 | -0.014  | NA |
| chr4 | 109093038 | 109094546 | RP11-558N14.1  | ENSG00000232021 | 516  | 0.21 | 0.2  | 0.77 | 0.012   | NA |
| chr4 | 123747740 | 123748980 | FGF2           | ENSG00000138685 | 497  | 0.17 | 0.16 | 0.77 | 0.0082  | NA |
| chr4 | 169552716 | 169552947 | PALLD          | ENSG00000129116 | 65   | 0.24 | 0.3  | 0.77 | -0.06   | NA |
| chr4 | 682724    | 683079    | MFSD7          | ENSG00000169026 | -132 | 0.28 | 0.26 | 0.78 | 0.014   | NA |
| chr4 | 47838604  | 47839946  | CORIN          | ENSG00000145244 | 249  | 0.21 | 0.2  | 0.79 | 0.0093  | NA |
| chr4 | 72052243  | 72053469  | SLC4A4         | ENSG00000080493 | -147 | 0.22 | 0.23 | 0.79 | -0.015  | NA |
| chr4 | 146653994 | 146654615 | C4orf51        | ENSG00000237136 | 698  | 0.19 | 0.18 | 0.79 | 0.014   | NA |
| chr4 | 190861591 | 190862475 | FRG1           | ENSG00000109536 | 90   | 0.26 | 0.25 | 0.79 | 0.013   | NA |
| chr4 | 6576735   | 6577173   | MAN2B2         | ENSG00000013288 | 52   | 0.19 | 0.17 | 0.8  | 0.017   | NA |
| chr4 | 9153957   | 9155504   | RP11-1286E23.2 | ENSG00000163612 | -292 | 0.29 | 0.27 | 0.8  | 0.02    | NA |
| chr4 | 122301567 | 122302290 | QRFPR          | ENSG00000186867 | -126 | 0.23 | 0.21 | 0.8  | 0.013   | NA |
| chr4 | 154074383 | 154075045 | TRIM2          | ENSG00000109654 | 444  | 0.24 | 0.23 | 0.8  | 0.015   | NA |
| chr4 | 165878036 | 165878446 | C4orf39        | ENSG00000250486 | 141  | 0.24 | 0.19 | 0.8  | 0.049   | NA |
| chr4 | 2928053   | 2928271   | ADD1           | ENSG00000087274 | 126  | 0.95 | 0.98 | 0.81 | -0.028  | NA |
| chr4 | 44728033  | 44728719  | GNPDA2         | ENSG00000163281 | 164  | 0.24 | 0.22 | 0.81 | 0.018   | NA |
| chr4 | 48343089  | 48344329  | SLAIN2         | ENSG00000109171 | 370  | 0.22 | 0.23 | 0.81 | -0.0072 | NA |
| chr4 | 74847528  | 74847830  | PF4            | ENSG00000163737 | 162  | 0.5  | 0.56 | 0.81 | -0.056  | NA |
| chr4 | 84405696  | 84406521  | FAM175A        | ENSG00000163322 | 110  | 0.19 | 0.17 | 0.81 | 0.028   | NA |
| chr4 | 156297601 | 156298094 | MAP9           | ENSG00000164114 | 83   | 0.18 | 0.17 | 0.81 | 0.01    | NA |
| chr4 | 186124665 | 186125441 | KIAA1430       | ENSG00000164323 | 102  | 0.25 | 0.24 | 0.82 | 0.016   | NA |
| chr4 | 113558032 | 113558681 | C4orf21        | ENSG00000138658 | -302 | 0.21 | 0.19 | 0.83 | 0.017   | NA |
| chr4 | 7940563   | 7941853   | AC097381.1     | ENSG00000228919 | 480  | 0.2  | 0.19 | 0.84 | 0.0078  | NA |
| chr4 | 47465510  | 47465819  | COMMD8         | ENSG00000169019 | 18   | 0.22 | 0.19 | 0.84 | 0.029   | NA |
| chr4 | 89513028  | 89514481  | HERC3          | ENSG00000138641 | 180  | 0.2  | 0.19 | 0.84 | 0.0066  | NA |
| chr4 | 887190    | 888164    | GAK            | ENSG00000178950 | 938  | 0.95 | 0.96 | 0.85 | -0.011  | NA |

|      |           |           |               |                 |       |      |      |      |         |    |
|------|-----------|-----------|---------------|-----------------|-------|------|------|------|---------|----|
| chr4 | 7802191   | 7802440   | AFAP1         | ENSG00000196526 | -1428 | 0.85 | 1    | 0.85 | -0.15   | NA |
| chr4 | 48272026  | 48272298  | TEC           | ENSG00000135605 | -281  | 0.25 | 0.29 | 0.85 | -0.044  | NA |
| chr4 | 123073394 | 123073776 | KIAA1109      | ENSG00000138688 | 97    | 0.2  | 0.19 | 0.86 | 0.011   | NA |
| chr4 | 110650701 | 110651385 | PLA2G12A      | ENSG00000123739 | 69    | 0.19 | 0.18 | 0.87 | 0.011   | NA |
| chr4 | 111117462 | 111118390 | ELOVL6        | ENSG00000170522 | 1596  | 0.27 | 0.26 | 0.87 | 0.015   | NA |
| chr4 | 147866829 | 147867159 | TTC29         | ENSG00000137473 | -14   | 0.21 | 0.23 | 0.87 | -0.017  | NA |
| chr4 | 53198     | 53672     | ZNF595        | ENSG00000197701 | 237   | 0.53 | 0.54 | 0.88 | -0.0035 | NA |
| chr4 | 843317    | 843936    | GAK           | ENSG00000178950 | 1835  | 0.96 | 0.97 | 0.88 | -0.013  | NA |
| chr4 | 1209765   | 1210193   | CTBP1         | ENSG00000159692 | 216   | 0.85 | 1    | 0.88 | -0.15   | NA |
| chr4 | 16227525  | 16229145  | TAPT1         | ENSG00000169762 | -682  | 0.2  | 0.21 | 0.88 | -0.0078 | NA |
| chr4 | 41749184  | 41749811  | PHOX2B        | ENSG00000109132 | 227   | 0.34 | 0.36 | 0.88 | -0.019  | NA |
| chr4 | 140374442 | 140375692 | RAB33B        | ENSG00000172007 | 106   | 0.2  | 0.17 | 0.88 | 0.022   | NA |
| chr4 | 24585435  | 24586175  | DHX15         | ENSG00000109606 | 100   | 0.18 | 0.2  | 0.89 | -0.016  | NA |
| chr4 | 71553854  | 71554473  | UTP3          | ENSG00000132467 | -33   | 0.23 | 0.22 | 0.89 | 0.008   | NA |
| chr4 | 89444407  | 89445055  | HERC3         | ENSG00000138641 | -230  | 0.24 | 0.25 | 0.89 | -0.011  | NA |
| chr4 | 4387593   | 4389919   | AC110814.1    | ENSG00000168824 | 773   | 0.24 | 0.24 | 0.9  | -0.0056 | NA |
| chr4 | 66536065  | 66536674  | EPHA5         | ENSG00000145242 | -156  | 0.16 | 0.17 | 0.9  | -0.0081 | NA |
| chr4 | 39699359  | 39700214  | UBE2K         | ENSG00000078140 | 122   | 0.27 | 0.26 | 0.91 | 0.011   | NA |
| chr4 | 128886004 | 128886971 | MFSD8         | ENSG00000164073 | -190  | 0.26 | 0.25 | 0.91 | 0.0075  | NA |
| chr4 | 148538449 | 148538718 | TMEM184C      | ENSG00000164168 | 49    | 0.29 | 0.35 | 0.91 | -0.066  | NA |
| chr4 | 164087461 | 164088146 | NAF1          | ENSG00000145414 | 101   | 0.22 | 0.21 | 0.91 | 0.0075  | NA |
| chr4 | 2262960   | 2264669   | MXD4          | ENSG00000123933 | -288  | 0.2  | 0.2  | 0.92 | 0.0039  | NA |
| chr4 | 13629245  | 13629655  | BOD1L         | ENSG00000038219 | -125  | 0.21 | 0.22 | 0.92 | -0.0067 | NA |
| chr4 | 113206832 | 113207278 | TIFA          | ENSG00000145365 | -12   | 0.17 | 0.18 | 0.92 | -0.0098 | NA |
| chr4 | 118954410 | 118955207 | NDST3         | ENSG00000164100 | 35    | 0.21 | 0.21 | 0.92 | 0.0065  | NA |
| chr4 | 119606477 | 119606810 | METTL14       | ENSG00000145388 | 120   | 0.27 | 0.31 | 0.92 | -0.034  | NA |
| chr4 | 48018490  | 48019381  | CNGA1         | ENSG00000198515 | -326  | 0.23 | 0.24 | 0.93 | -0.009  | NA |
| chr4 | 155471133 | 155471682 | PLRG1         | ENSG00000171566 | 128   | 0.24 | 0.26 | 0.93 | -0.012  | NA |
| chr4 | 44680343  | 44680741  | GUF1          | ENSG00000151806 | 98    | 0.21 | 0.2  | 0.94 | 0.0059  | NA |
| chr4 | 95128657  | 95129289  | RP11-363G15.2 | ENSG00000246541 | -266  | 0.18 | 0.17 | 0.94 | 0.0091  | NA |

|      |           |           |               |                 |       |      |      |      |         |    |
|------|-----------|-----------|---------------|-----------------|-------|------|------|------|---------|----|
| chr4 | 129730646 | 129731026 | PHF17         | ENSG00000077684 | 57    | 0.56 | 0.5  | 0.94 | 0.06    | NA |
| chr4 | 6988305   | 6989373   | TBC1D14       | ENSG00000132405 | -50   | 0.26 | 0.25 | 0.95 | 0.0073  | NA |
| chr4 | 48987790  | 48988808  | CWH43         | ENSG00000109182 | 35    | 0.2  | 0.2  | 0.95 | -0.0056 | NA |
| chr4 | 54966163  | 54968063  | GSX2          | ENSG00000180613 | 915   | 0.27 | 0.28 | 0.95 | -0.0061 | NA |
| chr4 | 174254683 | 174256538 | HMGB2         | ENSG00000164104 | -787  | 0.21 | 0.22 | 0.95 | -0.0068 | NA |
| chr4 | 16084195  | 16085735  | PROM1         | ENSG00000007062 | -734  | 0.24 | 0.23 | 0.96 | 0.0059  | NA |
| chr4 | 41882450  | 41882964  | RP11-457P14.4 | ENSG00000245870 | 1153  | 0.21 | 0.2  | 0.96 | 0.011   | NA |
| chr4 | 103789994 | 103790510 | UBE2D3        | ENSG00000109332 | -234  | 0.21 | 0.23 | 0.96 | -0.022  | NA |
| chr4 | 2009714   | 2011428   | WHSC2         | ENSG00000185049 | -9    | 0.22 | 0.22 | 0.97 | 0.0032  | NA |
| chr4 | 7069098   | 7070402   | GRPEL1        | ENSG00000109519 | -476  | 0.19 | 0.19 | 0.97 | 0.007   | NA |
| chr4 | 25235458  | 25236246  | PI4K2B        | ENSG00000038210 | 255   | 0.17 | 0.17 | 0.97 | -0.0037 | NA |
| chr4 | 37891656  | 37893314  | TBC1D1        | ENSG00000065882 | -223  | 0.23 | 0.25 | 0.97 | -0.013  | NA |
| chr4 | 148652848 | 148653918 | ARHGAP10      | ENSG00000071205 | 169   | 0.2  | 0.19 | 0.97 | 0.0037  | NA |
| chr4 | 6717899   | 6718549   | CNO           | ENSG00000186222 | 382   | 0.16 | 0.15 | 0.98 | 0.0067  | NA |
| chr4 | 39640156  | 39640923  | C4orf34       | ENSG00000163683 | -74   | 0.14 | 0.15 | 0.98 | -0.0031 | NA |
| chr4 | 57333461  | 57334195  | SRP72         | ENSG00000174780 | 66    | 0.28 | 0.29 | 0.98 | -0.0063 | NA |
| chr4 | 122744557 | 122745267 | CCNA2         | ENSG00000145386 | 175   | 0.17 | 0.18 | 0.98 | -0.0053 | NA |
| chr4 | 8594412   | 8594777   | CPZ           | ENSG00000109625 | 159   | 0.28 | 0.27 | 0.99 | 0.012   | NA |
| chr4 | 10020481  | 10021026  | SLC2A9        | ENSG00000109667 | -54   | 0.23 | 0.21 | 0.99 | 0.012   | NA |
| chr4 | 52917388  | 52918280  | SPATA18       | ENSG00000163071 | 337   | 0.24 | 0.22 | 0.99 | 0.022   | NA |
| chr4 | 529848    | 530049    | PIGG          | ENSG00000174227 | -546  | 0.95 | 1    | 1    | -0.053  | NA |
| chr4 | 530297    | 530600    | PIGG          | ENSG00000174227 | -46   | 0.96 | 1    | 1    | -0.04   | NA |
| chr4 | 650278    | 651114    | RP11-1191J2.2 | ENSG00000242686 | -1262 | 0.76 | 0.76 | 1    | -0.0008 | NA |
| chr4 | 698302    | 698692    | PCGF3         | ENSG00000185619 | -1040 | 0.96 | 0.98 | 1    | -0.015  | NA |
| chr4 | 699541    | 699951    | PCGF3         | ENSG00000185619 | 192   | 0.25 | 0.27 | 1    | -0.018  | NA |
| chr4 | 716281    | 716977    | RP11-1191J2.4 | ENSG00000248416 | 1194  | 1    | 0.99 | 1    | 0.00075 | NA |
| chr4 | 818646    | 820970    | CPLX1         | ENSG00000168993 | 72    | 0.28 | 0.28 | 1    | 0.0027  | NA |
| chr4 | 1005930   | 1006282   | FGFRL1        | ENSG00000127418 | 172   | 0.22 | 0.23 | 1    | -0.006  | NA |
| chr4 | 1007037   | 1007288   | FGFRL1        | ENSG00000127418 | 923   | 0.99 | 1    | 1    | -0.014  | NA |
| chr4 | 1022286   | 1022667   | RP11-460I19.2 | ENSG00000250259 | 1010  | 0.91 | 0.91 | 1    | 0.0049  | NA |

|      |          |          |               |                 |      |      |      |   |          |    |
|------|----------|----------|---------------|-----------------|------|------|------|---|----------|----|
| chr4 | 1222291  | 1222497  | CTBP1         | ENSG00000159692 | -322 | 0.9  | 0.87 | 1 | 0.031    | NA |
| chr4 | 1283250  | 1284331  | MAEA          | ENSG00000090316 | 151  | 0.23 | 0.23 | 1 | -0.0054  | NA |
| chr4 | 1645886  | 1646324  | FAM53A        | ENSG00000174137 | 575  | 1    | 1    | 1 | 0        | NA |
| chr4 | 2757653  | 2758010  | TNIP2         | ENSG00000168884 | -80  | 0.14 | 0.14 | 1 | 0.0031   | NA |
| chr4 | 3075483  | 3075773  | RP11-520M5.6  | ENSG00000251075 | 613  | 0.23 | 0.24 | 1 | -0.0084  | NA |
| chr4 | 3310005  | 3310235  | RGS12         | ENSG00000159788 | -642 | 0.25 | 0.3  | 1 | -0.055   | NA |
| chr4 | 3414681  | 3415353  | RGS12         | ENSG00000159788 | 304  | 0.99 | 1    | 1 | -0.0085  | NA |
| chr4 | 5713035  | 5713451  | EVC           | ENSG00000072840 | 301  | 0.14 | 0.16 | 1 | -0.02    | NA |
| chr4 | 15656364 | 15657739 | FBXL5         | ENSG00000118564 | -133 | 0.2  | 0.2  | 1 | -0.0065  | NA |
| chr4 | 16257947 | 16258227 | AC006427.1    | ENSG00000242358 | 91   | 0.99 | 1    | 1 | -0.012   | NA |
| chr4 | 16362416 | 16362766 | ZEB2P1        | ENSG00000249506 | 861  | 0.98 | 0.97 | 1 | 0.013    | NA |
| chr4 | 21950085 | 21950346 | KCNIP4        | ENSG00000185774 | 39   | 0.13 | 0.1  | 1 | 0.027    | NA |
| chr4 | 25506581 | 25508076 | RP11-206P5.2  | ENSG00000248608 | 710  | 0.98 | 0.98 | 1 | 8.00E-04 | NA |
| chr4 | 26320769 | 26321008 | RBPJ          | ENSG00000168214 | -396 | 0.18 | 0.17 | 1 | 0.0062   | NA |
| chr4 | 26361172 | 26361411 | RBPJ          | ENSG00000168214 | -22  | 0.94 | 0.92 | 1 | 0.013    | NA |
| chr4 | 39183823 | 39184225 | WDR19         | ENSG00000157796 | 0    | 0.21 | 0.17 | 1 | 0.04     | NA |
| chr4 | 39460087 | 39460811 | RPL9          | ENSG00000163682 | 59   | 0.18 | 0.17 | 1 | 0.008    | NA |
| chr4 | 39528728 | 39529723 | UGDH          | ENSG00000109814 | -168 | 0.17 | 0.17 | 1 | 0.0046   | NA |
| chr4 | 40045511 | 40045733 | RP11-333E13.4 | ENSG00000205794 | 79   | 0.99 | 0.98 | 1 | 0.007    | NA |
| chr4 | 41983922 | 41984183 | DCAF4L1       | ENSG00000182308 | 339  | 1    | 1    | 1 | 0        | NA |
| chr4 | 47708443 | 47708712 | RP11-100N21.1 | ENSG00000242262 | 188  | 0.96 | 1    | 1 | -0.037   | NA |
| chr4 | 52710535 | 52711124 | DCUN1D4       | ENSG00000109184 | -221 | 0.25 | 0.25 | 1 | -0.0021  | NA |
| chr4 | 56814800 | 56815511 | CEP135        | ENSG00000174799 | 118  | 0.14 | 0.13 | 1 | 0.0024   | NA |
| chr4 | 57371582 | 57372022 | ARL9          | ENSG00000196503 | 427  | 0.25 | 0.25 | 1 | 0        | NA |
| chr4 | 64214847 | 64215584 | RP11-553E5.1  | ENSG00000231442 | -617 | 0.96 | 0.96 | 1 | 0.0023   | NA |
| chr4 | 75310686 | 75311140 | AREG          | ENSG00000109321 | 62   | 0.21 | 0.19 | 1 | 0.018    | NA |
| chr4 | 75719101 | 75719740 | BTC           | ENSG00000174808 | 476  | 0.33 | 0.36 | 1 | -0.024   | NA |
| chr4 | 77723092 | 77723424 | RP11-359D14.3 | ENSG00000224218 | -141 | 0.64 | 0.64 | 1 | -0.0032  | NA |
| chr4 | 78077995 | 78079591 | CCNG2         | ENSG00000138764 | 489  | 0.23 | 0.23 | 1 | 2.60E-05 | NA |
| chr4 | 79102900 | 79103261 | RP11-721G13.1 | ENSG00000249565 | 120  | 1    | 1    | 1 | 0        | NA |

|      |           |           |               |                 |       |      |      |   |         |    |
|------|-----------|-----------|---------------|-----------------|-------|------|------|---|---------|----|
| chr4 | 81104761  | 81105527  | PRDM8         | ENSG00000152784 | 111   | 0.31 | 0.3  | 1 | 0.0085  | NA |
| chr4 | 81119095  | 81119391  | PRDM8         | ENSG00000152784 | 585   | 0.12 | 0.12 | 1 | 0.0087  | NA |
| chr4 | 83821688  | 83822065  | SEC31A        | ENSG00000138674 | -185  | 0.26 | 0.25 | 1 | 0.0064  | NA |
| chr4 | 84457115  | 84457860  | AGPAT9        | ENSG00000138678 | 359   | 0.2  | 0.21 | 1 | -0.013  | NA |
| chr4 | 89204952  | 89206069  | PPM1K         | ENSG00000163644 | -468  | 0.26 | 0.25 | 1 | 0.0033  | NA |
| chr4 | 90228714  | 90229010  | GPRIN3        | ENSG00000185477 | 299   | 0.25 | 0.25 | 1 | -0.0036 | NA |
| chr4 | 93103617  | 93103953  | RP11-562F9.1  | ENSG00000248817 | 1418  | 0.97 | 0.96 | 1 | 0.00051 | NA |
| chr4 | 99064602  | 99064805  | C4orf37       | ENSG00000163116 | -312  | 0.24 | 0.23 | 1 | 0.0034  | NA |
| chr4 | 102267096 | 102267320 | PPP3CA        | ENSG00000138814 | 745   | 0.3  | 0.27 | 1 | 0.029   | NA |
| chr4 | 103940668 | 103940951 | NHEDC1        | ENSG00000164037 | -2    | 0.23 | 0.22 | 1 | 0.0045  | NA |
| chr4 | 104119319 | 104119663 | CENPE         | ENSG00000138778 | 15    | 0.17 | 0.18 | 1 | -0.012  | NA |
| chr4 | 109092578 | 109092839 | RP11-558N14.1 | ENSG00000232021 | -219  | 0.22 | 0.22 | 1 | 0.0067  | NA |
| chr4 | 119273305 | 119274458 | PRSS12        | ENSG00000164099 | 277   | 0.19 | 0.19 | 1 | 0.0048  | NA |
| chr4 | 120375746 | 120376363 | RP11-33B1.1   | ENSG00000245958 | 108   | 0.2  | 0.2  | 1 | 0.0012  | NA |
| chr4 | 120987617 | 120988156 | MAD2L1        | ENSG00000164109 | 90    | 0.15 | 0.15 | 1 | -0.0012 | NA |
| chr4 | 122722335 | 122722758 | EXOSC9        | ENSG00000123737 | 74    | 0.24 | 0.23 | 1 | 0.0051  | NA |
| chr4 | 123300407 | 123300805 | ADAD1         | ENSG00000164113 | 11    | 0.97 | 0.97 | 1 | -0.0009 | NA |
| chr4 | 123653585 | 123654000 | BBS12         | ENSG00000181004 | -65   | 0.21 | 0.2  | 1 | 0.002   | NA |
| chr4 | 135865380 | 135865585 | RP11-192C21.3 | ENSG00000251228 | 52    | 1    | 1    | 1 | 0       | NA |
| chr4 | 141348042 | 141348957 | CLGN          | ENSG00000153132 | 45    | 0.19 | 0.18 | 1 | 0.0048  | NA |
| chr4 | 141489962 | 141490378 | UCP1          | ENSG00000109424 | -211  | 0.25 | 0.25 | 1 | 0.0047  | NA |
| chr4 | 141676920 | 141678170 | TBC1D9        | ENSG00000109436 | -271  | 0.18 | 0.18 | 1 | -0.0003 | NA |
| chr4 | 142053327 | 142054601 | RNF150        | ENSG00000170153 | 32    | 0.18 | 0.18 | 1 | 0.0018  | NA |
| chr4 | 147558231 | 147558583 | POU4F2        | ENSG00000151615 | -1638 | 0.22 | 0.21 | 1 | 0.009   | NA |
| chr4 | 155547984 | 155548322 | LRAT          | ENSG00000121207 | 56    | 0.16 | 0.16 | 1 | -0.0074 | NA |
| chr4 | 156680095 | 156681386 | GUCY1B3       | ENSG00000061918 | 596   | 0.18 | 0.18 | 1 | -0.0001 | NA |
| chr4 | 164252954 | 164253471 | NPY1R         | ENSG00000164128 | 536   | 0.17 | 0.17 | 1 | 0.0044  | NA |
| chr4 | 165109389 | 165109842 | RP11-39C10.1  | ENSG00000250746 | 152   | 0.98 | 0.99 | 1 | -0.0054 | NA |
| chr4 | 169930790 | 169931607 | CBR4          | ENSG00000145439 | 33    | 0.18 | 0.18 | 1 | #####   | NA |
| chr4 | 175204565 | 175205395 | FBXO8         | ENSG00000164117 | -183  | 0.2  | 0.19 | 1 | 0.01    | NA |

|      |           |           |               |                 |       |      |      |          |         |    |
|------|-----------|-----------|---------------|-----------------|-------|------|------|----------|---------|----|
| chr4 | 176923075 | 176923630 | GPM6A         | ENSG00000150625 | 131   | 0.38 | 0.33 | 1        | 0.052   | NA |
| chr4 | 184404501 | 184404771 | RP11-367N14.1 | ENSG00000213434 | -7    | 1    | 1    | 1        | 0       | NA |
| chr4 | 186455983 | 186456864 | PDLIM3        | ENSG00000154553 | 197   | 0.18 | 0.19 | 1        | -0.0015 | NA |
| chr4 | 187422034 | 187422244 | RP11-215A19.1 | ENSG00000251165 | 12    | 0.97 | 1    | 1        | -0.027  | NA |
| chr4 | 190962111 | 190962689 | AGGF1P1       | ENSG00000214273 | -97   | 0.79 | 0.79 | 1        | -0.0002 | NA |
| chr4 | 876455    | 876740    | GAK           | ENSG00000178950 | 1581  | 1    | NA   | NA       | NA      | NA |
| chr4 | 899774    | 899985    | GAK           | ENSG00000178950 | -1310 | 0.33 | NA   | NA       | NA      | NA |
| chr4 | 940613    | 941057    | TMEM175       | ENSG00000127419 | -1364 | 0.86 | NA   | NA       | NA      | NA |
| chr4 | 960505    | 960836    | DGKQ          | ENSG00000145214 | 293   | 0.96 | NA   | NA       | NA      | NA |
| chr4 | 4119800   | 4120035   | RP11-489M13.2 | ENSG00000248669 | 94    | 0.67 | NA   | NA       | NA      | NA |
| chr4 | 8376706   | 8376983   | ACOX3         | ENSG00000087008 | -950  | 0.89 | NA   | NA       | NA      | NA |
| chr4 | 11429414  | 11429633  | HS3ST1        | ENSG00000002587 | 698   | 0.67 | NA   | NA       | NA      | NA |
| chr4 | 13530847  | 13531244  | AC006445.1    | ENSG00000249512 | 1996  | 0.28 | NA   | NA       | NA      | NA |
| chr4 | 13537646  | 13537973  | AC006445.1    | ENSG00000249512 | -1850 | 0.5  | NA   | NA       | NA      | NA |
| chr4 | 25314217  | 25314558  | ZCCHC4        | ENSG00000168228 | -20   | 0.24 | NA   | NA       | NA      | NA |
| chr4 | 39481980  | 39482195  | RP11-472B18.1 | ENSG00000224097 | 102   | 0.5  | NA   | NA       | NA      | NA |
| chr4 | 39771679  | 39771944  | ZBTB12B       | ENSG00000180610 | 1180  | 1    | NA   | NA       | NA      | NA |
| chr4 | 41752280  | 41752502  | RP11-227F19.2 | ENSG00000249122 | 29    | 0.13 | NA   | NA       | NA      | NA |
| chr4 | 57396748  | 57397269  | RP11-630A13.2 | ENSG00000249693 | 233   | 0.14 | NA   | NA       | NA      | NA |
| chr4 | 69048062  | 69048437  | FTLP10        | ENSG00000250426 | 218   | 1    | NA   | NA       | NA      | NA |
| chr4 | 74719087  | 74719339  | PF4V1         | ENSG00000109272 | 307   | 0.38 | NA   | NA       | NA      | NA |
| chr4 | 74864113  | 74864329  | CXCL5         | ENSG00000163735 | 275   | 1    | NA   | NA       | NA      | NA |
| chr4 | 88343677  | 88344159  | NUDT9         | ENSG00000170502 | 184   | 0.33 | NA   | NA       | NA      | NA |
| chr4 | 104640559 | 104640797 | TACR3         | ENSG00000169836 | 295   | 0.56 | NA   | NA       | NA      | NA |
| chr4 | 123844153 | 123844438 | SPATA5        | ENSG00000145375 | 66    | 0.33 | NA   | NA       | NA      | NA |
| chr4 | 139481734 | 139481996 | RP11-173E2.1  | ENSG00000248795 | 7     | 1    | NA   | NA       | NA      | NA |
| chr4 | 140201064 | 140201449 | C4orf49       | ENSG00000137463 | 236   | 0.23 | NA   | NA       | NA      | NA |
| chr4 | 164394674 | 164395062 | TKTL2         | ENSG00000151005 | 179   | 0.92 | NA   | NA       | NA      | NA |
| chr4 | 177116543 | 177116893 | SPATA4        | ENSG00000150628 | -26   | 1    | NA   | NA       | NA      | NA |
| chr5 | 113696516 | 113699195 | KCNN2         | ENSG00000080709 | 1189  | 0.27 | 0.16 | 1.10E-09 | 0.11    | NA |

|      |           |           |               |                 |       |      |      |          |       |    |
|------|-----------|-----------|---------------|-----------------|-------|------|------|----------|-------|----|
| chr5 | 140589744 | 140590657 | PCDHB12       | ENSG00000120328 | 580   | 0.81 | 0.47 | 1.20E-09 | 0.34  | NA |
| chr5 | 63256548  | 63257886  | HTR1A         | ENSG00000178394 | 563   | 0.32 | 0.13 | 1.80E-09 | 0.19  | NA |
| chr5 | 140787447 | 140788044 | PCDHGB6       | ENSG00000253305 | -25   | 0.58 | 0.29 | 1.80E-09 | 0.29  | NA |
| chr5 | 191792    | 192544    | LRRC14B       | ENSG00000185028 | 542   | 0.82 | 0.62 | 2.80E-09 | 0.21  | NA |
| chr5 | 140249734 | 140250949 | PCDHA11       | ENSG00000249158 | 1652  | 0.83 | 0.62 | 3.60E-09 | 0.21  | NA |
| chr5 | 140052059 | 140053381 | DND1          | ENSG00000256453 | 451   | 0.85 | 0.66 | 3.90E-09 | 0.19  | NA |
| chr5 | 140789094 | 140789762 | PCDHGB6       | ENSG00000253305 | 1658  | 0.73 | 0.4  | 4.70E-09 | 0.34  | NA |
| chr5 | 140683195 | 140683773 | SLC25A2       | ENSG00000120329 | 128   | 0.75 | 0.5  | 1.00E-08 | 0.24  | NA |
| chr5 | 140175666 | 140176813 | PCDHA2        | ENSG00000204969 | 1689  | 0.94 | 0.77 | 2.20E-08 | 0.17  | NA |
| chr5 | 140800760 | 140801072 | PCDHGA11      | ENSG00000253873 | 154   | 0.66 | 0.37 | 3.60E-08 | 0.29  | NA |
| chr5 | 140626444 | 140627373 | PCDHB15       | ENSG00000113248 | 1761  | 0.89 | 0.63 | 3.70E-08 | 0.26  | NA |
| chr5 | 1444678   | 1446648   | SLC6A3        | ENSG00000142319 | -118  | 0.45 | 0.28 | 4.00E-08 | 0.17  | NA |
| chr5 | 177398162 | 177398434 | RP11-1252I4.1 | ENSG00000249129 | -19   | 0.85 | 0.57 | 1.70E-07 | 0.28  | NA |
| chr5 | 56110725  | 56112909  | MAP3K1        | ENSG00000095015 | 416   | 0.3  | 0.17 | 1.80E-07 | 0.14  | NA |
| chr5 | 172385522 | 172385912 | RPL26L1       | ENSG00000037241 | -15   | 0.33 | 0.13 | 1.80E-07 | 0.2   | NA |
| chr5 | 178053432 | 178054411 | CLK4          | ENSG00000113240 | 81    | 0.35 | 0.17 | 2.60E-07 | 0.18  | NA |
| chr5 | 10562816  | 10565680  | ANKRD33B      | ENSG00000164236 | -194  | 0.42 | 0.3  | 4.70E-07 | 0.11  | NA |
| chr5 | 140794358 | 140795045 | PCDHGA10      | ENSG00000253846 | 1958  | 0.86 | 0.56 | 4.70E-07 | 0.31  | NA |
| chr5 | 140711797 | 140712542 | PCDHGA1       | ENSG00000204956 | 1917  | 0.88 | 0.6  | 4.90E-07 | 0.29  | NA |
| chr5 | 140188014 | 140188986 | PCDHA4        | ENSG00000204967 | 1727  | 0.95 | 0.78 | 5.60E-07 | 0.17  | NA |
| chr5 | 145718289 | 145720095 | POU4F3        | ENSG00000091010 | 605   | 0.49 | 0.29 | 6.50E-07 | 0.21  | NA |
| chr5 | 132387100 | 132388369 | HSPA4         | ENSG00000170606 | 80    | 0.32 | 0.19 | 7.70E-07 | 0.13  | NA |
| chr5 | 140855386 | 140856620 | PCDHGC3       | ENSG00000240184 | 423   | 0.5  | 0.31 | 9.30E-07 | 0.19  | NA |
| chr5 | 476317    | 476933    | CTD-2228K2.7  | ENSG00000225138 | -1613 | 0.51 | 0.85 | 1.20E-06 | -0.34 | NA |
| chr5 | 141705391 | 141705688 | SPRY4         | ENSG00000187678 | 481   | 0.35 | 0.09 | 1.30E-06 | 0.25  | NA |
| chr5 | 176432854 | 176433908 | UIMC1         | ENSG00000087206 | -15   | 0.31 | 0.16 | 1.40E-06 | 0.15  | NA |
| chr5 | 1523025   | 1524588   | LPCAT1        | ENSG00000153395 | 49    | 0.31 | 0.18 | 2.10E-06 | 0.13  | NA |
| chr5 | 33936168  | 33938309  | RXFP3         | ENSG00000182631 | 747   | 0.38 | 0.22 | 2.30E-06 | 0.16  | NA |
| chr5 | 3535630   | 3536355   | RP11-121L11.1 | ENSG00000248118 | 216   | 0.88 | 0.98 | 3.80E-06 | -0.1  | NA |
| chr5 | 140186792 | 140187268 | PCDHA4        | ENSG00000204967 | 257   | 0.81 | 0.47 | 3.90E-06 | 0.35  | NA |



|      |           |           |              |                 |       |      |      |          |       |    |
|------|-----------|-----------|--------------|-----------------|-------|------|------|----------|-------|----|
| chr5 | 136834016 | 136835146 | SPOCK1       | ENSG00000152377 | -334  | 0.31 | 0.14 | 4.10E-06 | 0.17  | NA |
| chr5 | 43396897  | 43397364  | CCL28        | ENSG00000151882 | 236   | 0.47 | 0.09 | 5.20E-06 | 0.37  | NA |
| chr5 | 7394986   | 7397022   | ADCY2        | ENSG00000078295 | -317  | 0.44 | 0.3  | 6.20E-06 | 0.14  | NA |
| chr5 | 140174573 | 140174888 | PCDHA2       | ENSG00000204969 | 180   | 0.98 | 0.5  | 6.20E-06 | 0.48  | NA |
| chr5 | 131593039 | 131593813 | PDLIM4       | ENSG00000131435 | 62    | 0.18 | 0.38 | 8.30E-06 | -0.2  | NA |
| chr5 | 179718528 | 179719767 | MAPK9        | ENSG00000050748 | -180  | 0.35 | 0.21 | 9.00E-06 | 0.14  | NA |
| chr5 | 38845502  | 38846476  | CTD-2127H9.1 | ENSG00000249740 | -119  | 0.37 | 0.19 | 1.20E-05 | 0.18  | NA |
| chr5 | 140516311 | 140517300 | PCDHB5       | ENSG00000113209 | 1140  | 0.79 | 0.6  | 1.20E-05 | 0.18  | NA |
| chr5 | 140741174 | 140741738 | PCDHGB2      | ENSG00000253910 | 1753  | 0.83 | 0.52 | 1.30E-05 | 0.31  | NA |
| chr5 | 179224732 | 179224985 | MIR1229      | ENSG00000221394 | 488   | 0.97 | 0.69 | 1.30E-05 | 0.28  | NA |
| chr5 | 1881924   | 1887743   | IRX4         | ENSG00000113430 | -1975 | 0.31 | 0.24 | 1.50E-05 | 0.066 | NA |
| chr5 | 138727710 | 138730911 | AC135457.1   | ENSG00000228672 | 1575  | 0.21 | 0.28 | 1.50E-05 | -0.07 | NA |
| chr5 | 175843118 | 175843844 | CLTB         | ENSG00000175416 | -219  | 0.28 | 0.14 | 2.00E-05 | 0.14  | NA |
| chr5 | 843458    | 843767    | ZDHHC11      | ENSG00000188818 | 196   | 0.81 | 0.95 | 2.40E-05 | -0.14 | NA |
| chr5 | 139125902 | 139127711 | CTB-35F21.2  | ENSG00000249131 | -998  | 0.46 | 0.27 | 2.80E-05 | 0.19  | NA |
| chr5 | 140202573 | 140203610 | PCDHA5       | ENSG00000204965 | 1730  | 0.94 | 0.72 | 3.20E-05 | 0.22  | NA |
| chr5 | 177540207 | 177541234 | N4BP3        | ENSG00000145911 | 276   | 0.19 | 0.36 | 3.90E-05 | -0.17 | NA |
| chr5 | 140248789 | 140249140 | PCDHA11      | ENSG00000249158 | 275   | 0.74 | 0.46 | 4.00E-05 | 0.28  | NA |
| chr5 | 140615391 | 140616353 | PCDHB18      | ENSG00000146001 | 1588  | 0.64 | 0.43 | 4.00E-05 | 0.21  | NA |
| chr5 | 143549939 | 143550333 | YIPF5        | ENSG00000145817 | 5     | 0.48 | 0.12 | 4.60E-05 | 0.36  | NA |
| chr5 | 44809047  | 44809692  | MRPS30       | ENSG00000112996 | 342   | 0.25 | 0.86 | 5.00E-05 | -0.61 | NA |
| chr5 | 70882936  | 70883413  | MCCC2        | ENSG00000131844 | 59    | 0.37 | 0.13 | 5.60E-05 | 0.25  | NA |
| chr5 | 140604453 | 140605304 | PCDHB14      | ENSG00000120327 | 1800  | 0.69 | 0.46 | 6.20E-05 | 0.23  | NA |
| chr5 | 153872839 | 153873228 | CTB-158E9.2  | ENSG00000253886 | -103  | 0.97 | 0.8  | 7.80E-05 | 0.16  | NA |
| chr5 | 177592655 | 177592986 | RP11-889L3.4 | ENSG00000251211 | 117   | 0.68 | 1    | 8.80E-05 | -0.32 | NA |
| chr5 | 177035351 | 177035660 | B4GALT7      | ENSG00000027847 | 1139  | 0.68 | 0.87 | 0.00011  | -0.19 | NA |
| chr5 | 131991554 | 131992304 | AC004041.2   | ENSG00000223442 | -345  | 0.3  | 0.14 | 0.00012  | 0.16  | NA |
| chr5 | 481639    | 482225    | SLC9A3       | ENSG00000066230 | 827   | 0.52 | 0.78 | 0.00013  | -0.26 | NA |
| chr5 | 140011482 | 140012739 | CD14         | ENSG00000170458 | 1126  | 0.21 | 0.43 | 0.00013  | -0.22 | NA |
| chr5 | 14664247  | 14664989  | FAM105B      | ENSG00000154124 | -155  | 0.22 | 0.13 | 0.00014  | 0.092 | NA |

|      |           |           |               |                 |       |      |      |          |        |    |
|------|-----------|-----------|---------------|-----------------|-------|------|------|----------|--------|----|
| chr5 | 133303986 | 133304399 | C5orf15       | ENSG00000113583 | 106   | 0.12 | 0.43 | 0.00014  | -0.31  | NA |
| chr5 | 172197482 | 172199606 | DUSP1         | ENSG00000120129 | -346  | 0.2  | 0.3  | 0.00014  | -0.095 | NA |
| chr5 | 145826576 | 145827430 | TCERG1        | ENSG00000113649 | 129   | 0.21 | 0.45 | 0.00015  | -0.24  | NA |
| chr5 | 122426125 | 122426836 | AC106786.1    | ENSG00000223652 | -486  | 0.44 | 0.23 | 0.00017  | 0.21   | NA |
| chr5 | 176923804 | 176925339 | PDLIM7        | ENSG00000196923 | -739  | 0.38 | 0.23 | 0.00025  | 0.15   | NA |
| chr5 | 180287903 | 180288862 | ZFP62         | ENSG00000196670 | -106  | 0.29 | 0.15 | 0.00028  | 0.14   | NA |
| chr5 | 179059337 | 179059700 | HNRNPH1       | ENSG00000169045 | 1923  | 0.99 | 0.9  | 0.00031  | 0.091  | NA |
| chr5 | 121297504 | 121297895 | SRFBP1        | ENSG00000151304 | 43    | 0.25 | 0.06 | 0.00033  | 0.19   | NA |
| chr5 | 52775533  | 52776645  | FST           | ENSG00000134363 | -150  | 0.23 | 0.36 | 0.00042  | -0.13  | NA |
| chr5 | 150138371 | 150138714 | DCTN4         | ENSG00000132912 | 40    | 0.28 | 0.13 | 0.00044  | 0.16   | NA |
| chr5 | 179636009 | 179636444 | RASGEF1C      | ENSG00000146090 | -73   | 0.39 | 0.13 | 0.00047  | 0.26   | NA |
| chr5 | 1856773   | 1858444   | CTD-2194D22.2 | ENSG00000250417 | -926  | 0.93 | 0.86 | 0.00051  | 0.07   | NA |
| chr5 | 140531157 | 140532017 | PCDHB6        | ENSG00000113211 | 1103  | 0.66 | 0.42 | 0.00054  | 0.24   | NA |
| chr5 | 52405269  | 52405767  | MOCS2         | ENSG00000164172 | 51    | 0.48 | 0.24 | 0.00055  | 0.24   | NA |
| chr5 | 140580723 | 140581625 | PCDHB11       | ENSG00000197479 | 896   | 0.74 | 0.51 | 0.00058  | 0.23   | NA |
| chr5 | 180100700 | 180101209 | RP11-451H23.2 | ENSG00000251352 | -1356 | 0.26 | 0.5  | 0.00059  | -0.24  | NA |
| chr5 | 180622178 | 180622658 | CTC-338M12.6  | ENSG00000250900 | -78   | 0.94 | 0.68 | 7.00E-04 | 0.27   | NA |
| chr5 | 114961329 | 114961969 | TMED7-TICAM2  | ENSG00000251201 | 62    | 0.16 | 0.3  | 0.00072  | -0.14  | NA |
| chr5 | 50678632  | 50679375  | ISL1          | ENSG00000016082 | 45    | 0.27 | 0.14 | 0.00074  | 0.13   | NA |
| chr5 | 177631219 | 177632508 | HNRNPAB       | ENSG00000197451 | 355   | 0.29 | 0.18 | 0.00087  | 0.11   | NA |
| chr5 | 178016558 | 178017670 | COL23A1       | ENSG00000050767 | 442   | 0.29 | 0.18 | 9.00E-04 | 0.11   | NA |
| chr5 | 180075688 | 180076906 | FLT4          | ENSG00000037280 | 248   | 0.2  | 0.14 | 0.00093  | 0.068  | NA |
| chr5 | 131131929 | 131133303 | FNIP1         | ENSG00000217128 | -2    | 0.17 | 0.27 | 0.00094  | -0.099 | NA |
| chr5 | 140228129 | 140228576 | PCDHA9        | ENSG00000204961 | 995   | 0.83 | 0.56 | 0.00097  | 0.27   | NA |
| chr5 | 92914770  | 92917337  | RP11-65F13.2  | ENSG00000237187 | 660   | 0.25 | 0.17 | 0.001    | 0.084  | NA |
| chr5 | 95170617  | 95170855  | AC008592.3    | ENSG00000251000 | 14    | 0.54 | 0.3  | 0.0011   | 0.23   | NA |
| chr5 | 131563094 | 131563954 | P4HA2         | ENSG00000072682 | -37   | 0.27 | 0.16 | 0.0012   | 0.12   | NA |
| chr5 | 140731239 | 140731979 | PCDHGB1       | ENSG00000254221 | 1781  | 0.83 | 0.64 | 0.0012   | 0.19   | NA |
| chr5 | 1008715   | 1010039   | NKD2          | ENSG00000145506 | 433   | 0.31 | 0.2  | 0.0014   | 0.11   | NA |
| chr5 | 42423530  | 42423740  | GHR           | ENSG00000112964 | -244  | 0.59 | 0.21 | 0.0015   | 0.38   | NA |

|      |           |           |               |                 |      |      |      |        |        |    |
|------|-----------|-----------|---------------|-----------------|------|------|------|--------|--------|----|
| chr5 | 140864527 | 140864748 | PCDHGC4       | ENSG00000242419 | -104 | 0.76 | 0.14 | 0.0015 | 0.62   | NA |
| chr5 | 140481546 | 140482460 | PCDHB3        | ENSG00000113205 | 1769 | 0.84 | 0.5  | 0.0016 | 0.34   | NA |
| chr5 | 68389677  | 68390334  | SLC30A5       | ENSG00000145740 | 187  | 0.34 | 0.15 | 0.0017 | 0.19   | NA |
| chr5 | 11903550  | 11904703  | CTNND2        | ENSG00000169862 | -35  | 0.17 | 0.1  | 0.0018 | 0.067  | NA |
| chr5 | 176830275 | 176831639 | F12           | ENSG00000131187 | -430 | 0.23 | 0.17 | 0.0019 | 0.066  | NA |
| chr5 | 421224    | 421751    | AHRR          | ENSG00000063438 | 452  | 0.84 | 0.95 | 0.0023 | -0.12  | NA |
| chr5 | 102201583 | 102201912 | PAM           | ENSG00000145730 | 33   | 0.19 | 0.41 | 0.0023 | -0.23  | NA |
| chr5 | 89705736  | 89705942  | AC093510.1    | ENSG00000255647 | 22   | 0.38 | 0.13 | 0.0024 | 0.24   | NA |
| chr5 | 134209887 | 134210504 | TXNDC15       | ENSG00000113621 | 134  | 0.25 | 0.14 | 0.0024 | 0.11   | NA |
| chr5 | 6582882   | 6583807   | CTD-2195M18.1 | ENSG00000250056 | -45  | 0.4  | 0.28 | 0.0026 | 0.12   | NA |
| chr5 | 140762401 | 140762768 | PCDHGA7       | ENSG00000253537 | 117  | 0.77 | 0.5  | 0.0026 | 0.27   | NA |
| chr5 | 692681    | 694377    | TPPP          | ENSG00000171368 | -19  | 0.13 | 0.23 | 0.0028 | -0.092 | NA |
| chr5 | 115151348 | 115152713 | CDO1          | ENSG00000129596 | 324  | 0.26 | 0.16 | 0.0029 | 0.1    | NA |
| chr5 | 343449    | 344535    | AHRR          | ENSG00000063438 | 349  | 0.46 | 0.6  | 0.003  | -0.13  | NA |
| chr5 | 175665136 | 175666027 | C5orf25       | ENSG00000170085 | 216  | 0.29 | 0.16 | 0.003  | 0.14   | NA |
| chr5 | 99870925  | 99871720  | CTD-2001C12.1 | ENSG00000247877 | -356 | 0.28 | 0.48 | 0.0031 | -0.2   | NA |
| chr5 | 141258422 | 141258816 | PCDH1         | ENSG00000156453 | 192  | 0.33 | 0.16 | 0.0033 | 0.17   | NA |
| chr5 | 156692812 | 156693749 | CYFIP2        | ENSG00000055163 | 191  | 0.25 | 0.36 | 0.004  | -0.11  | NA |
| chr5 | 175963498 | 175965116 | RNF44         | ENSG00000146083 | -10  | 0.31 | 0.2  | 0.0042 | 0.11   | NA |
| chr5 | 114598301 | 114598657 | PGGT1B        | ENSG00000164219 | 69   | 0.39 | 0.2  | 0.0044 | 0.19   | NA |
| chr5 | 130500226 | 130501095 | HINT1         | ENSG00000169567 | 253  | 0.31 | 0.18 | 0.0047 | 0.12   | NA |
| chr5 | 76114562  | 76115044  | F2RL1         | ENSG00000164251 | 45   | 0.35 | 0.59 | 0.0048 | -0.24  | NA |
| chr5 | 126409006 | 126409327 | C5orf63       | ENSG00000164241 | -85  | 0.64 | 0.34 | 0.0049 | 0.29   | NA |
| chr5 | 67510872  | 67512386  | PIK3R1        | ENSG00000145675 | 81   | 0.23 | 0.16 | 0.005  | 0.072  | NA |
| chr5 | 140998077 | 140998875 | DIAPH1        | ENSG00000131504 | 5    | 0.17 | 0.29 | 0.0052 | -0.12  | NA |
| chr5 | 151150014 | 151152086 | G3BP1         | ENSG00000145907 | 444  | 0.27 | 0.17 | 0.0052 | 0.1    | NA |
| chr5 | 174870753 | 174872345 | DRD1          | ENSG00000184845 | -386 | 0.29 | 0.2  | 0.0053 | 0.086  | NA |
| chr5 | 140797162 | 140797701 | PCDHGB7       | ENSG00000254122 | 4    | 0.43 | 0.21 | 0.0056 | 0.22   | NA |
| chr5 | 169064270 | 169064702 | DOCK2         | ENSG00000134516 | 196  | 0.24 | 0.06 | 0.0056 | 0.18   | NA |
| chr5 | 139554389 | 139555457 | C5orf32       | ENSG00000120306 | 182  | 0.23 | 0.15 | 0.0057 | 0.079  | NA |

|      |           |           |              |                 |      |      |      |        |        |    |
|------|-----------|-----------|--------------|-----------------|------|------|------|--------|--------|----|
| chr5 | 114937613 | 114938149 | AC010226.4   | ENSG00000249249 | 127  | 0.26 | 0.14 | 0.006  | 0.12   | NA |
| chr5 | 50265085  | 50265737  | CTD-2089N3.3 | ENSG00000248918 | -83  | 0.32 | 0.22 | 0.0063 | 0.1    | NA |
| chr5 | 150911152 | 150911501 | FAT2         | ENSG00000086570 | 207  | 1    | 0.6  | 0.0066 | 0.4    | NA |
| chr5 | 133859942 | 133863428 | PHF15        | ENSG00000043143 | 1682 | 0.27 | 0.2  | 0.0068 | 0.067  | NA |
| chr5 | 170845760 | 170848124 | FGF18        | ENSG00000156427 | 282  | 0.2  | 0.14 | 0.0071 | 0.06   | NA |
| chr5 | 133561140 | 133562544 | PPP2CA       | ENSG00000113575 | -597 | 0.24 | 0.17 | 0.0075 | 0.062  | NA |
| chr5 | 611944    | 612881    | RP11-310P5.1 | ENSG00000249650 | -87  | 0.3  | 0.17 | 0.0083 | 0.13   | NA |
| chr5 | 72143909  | 72144822  | TNPO1        | ENSG00000083312 | 368  | 0.26 | 0.17 | 0.0088 | 0.094  | NA |
| chr5 | 150004670 | 150004984 | SYNPO        | ENSG00000171992 | 550  | 0.4  | 0.13 | 0.009  | 0.26   | NA |
| chr5 | 108744926 | 108745640 | PJA2         | ENSG00000198961 | -268 | 0.24 | 0.52 | 0.0091 | -0.28  | NA |
| chr5 | 50683285  | 50683615  | ISL1         | ENSG00000016082 | 1154 | 0.25 | 0.6  | 0.0094 | -0.35  | NA |
| chr5 | 133511971 | 133512902 | SKP1         | ENSG00000113558 | -26  | 0.24 | 0.17 | 0.0094 | 0.069  | NA |
| chr5 | 79551369  | 79552294  | SERINC5      | ENSG00000164300 | 7    | 0.28 | 0.18 | 0.0095 | 0.1    | NA |
| chr5 | 115177234 | 115178256 | ATG12        | ENSG00000145782 | -504 | 0.22 | 0.15 | 0.0098 | 0.068  | NA |
| chr5 | 140767196 | 140767695 | PCDHGB4      | ENSG00000253953 | -7   | 1    | 0.42 | 0.0098 | 0.58   | NA |
| chr5 | 14872206  | 14872572  | ANKH         | ENSG00000154122 | -502 | 0.29 | 0.14 | 0.011  | 0.15   | NA |
| chr5 | 37209072  | 37209461  | OFD1P17      | ENSG00000228212 | -200 | 0.99 | 0.89 | 0.011  | 0.1    | NA |
| chr5 | 61699350  | 61699877  | DIMT1L       | ENSG00000086189 | 105  | 0.15 | 0.27 | 0.011  | -0.12  | NA |
| chr5 | 73935725  | 73937551  | HEXB         | ENSG00000049860 | 790  | 0.23 | 0.17 | 0.011  | 0.063  | NA |
| chr5 | 122180963 | 122181681 | SNX24        | ENSG00000064652 | 178  | 0.15 | 0.25 | 0.011  | -0.1   | NA |
| chr5 | 179634577 | 179634875 | RASGEF1C     | ENSG00000146090 | 1427 | 0.41 | 0.17 | 0.011  | 0.24   | NA |
| chr5 | 75012962  | 75013515  | POC5         | ENSG00000152359 | -69  | 0.2  | 0.35 | 0.012  | -0.15  | NA |
| chr5 | 92956320  | 92957340  | MIR2277      | ENSG00000251725 | -336 | 0.29 | 0.19 | 0.012  | 0.099  | NA |
| chr5 | 134094169 | 134094771 | DDX46        | ENSG00000145833 | 1    | 0.22 | 0.33 | 0.012  | -0.12  | NA |
| chr5 | 168727429 | 168728275 | SLIT3        | ENSG00000184347 | -139 | 0.28 | 0.18 | 0.012  | 0.11   | NA |
| chr5 | 176764115 | 176764542 | LMAN2        | ENSG00000169223 | 1217 | 0.79 | 1    | 0.012  | -0.21  | NA |
| chr5 | 178322713 | 178323538 | ZFP2         | ENSG00000198939 | 230  | 0.28 | 0.17 | 0.012  | 0.1    | NA |
| chr5 | 180236992 | 180238209 | MGAT1        | ENSG00000131446 | -473 | 0.22 | 0.31 | 0.013  | -0.098 | NA |
| chr5 | 6448753   | 6449629   | UBE2QL1      | ENSG00000215218 | 455  | 0.25 | 0.15 | 0.014  | 0.096  | NA |
| chr5 | 34929401  | 34930441  | DNAJC21      | ENSG00000168724 | 223  | 0.18 | 0.25 | 0.014  | -0.075 | NA |

|      |           |           |               |                 |       |      |      |       |        |    |
|------|-----------|-----------|---------------|-----------------|-------|------|------|-------|--------|----|
| chr5 | 131705169 | 131705971 | AC034220.3    | ENSG00000233006 | -230  | 0.25 | 0.13 | 0.014 | 0.12   | NA |
| chr5 | 172483115 | 172483862 | C5orf41       | ENSG00000164463 | 133   | 0.22 | 0.13 | 0.014 | 0.084  | NA |
| chr5 | 128795503 | 128797417 | ADAMTS19      | ENSG00000145808 | 502   | 0.26 | 0.2  | 0.015 | 0.065  | NA |
| chr5 | 138739492 | 138739912 | SPATA24       | ENSG00000170469 | 37    | 0.34 | 0.13 | 0.015 | 0.21   | NA |
| chr5 | 158636218 | 158636949 | RNF145        | ENSG00000145860 | -24   | 0.2  | 0.1  | 0.016 | 0.099  | NA |
| chr5 | 174151478 | 174152364 | MSX2          | ENSG00000120149 | 385   | 0.17 | 0.25 | 0.016 | -0.08  | NA |
| chr5 | 16935555  | 16936408  | MYO10         | ENSG00000145555 | 66    | 0.14 | 0.2  | 0.017 | -0.066 | NA |
| chr5 | 180630981 | 180632569 | TRIM7         | ENSG00000146054 | -435  | 0.22 | 0.16 | 0.017 | 0.061  | NA |
| chr5 | 68628422  | 68628739  | CCDC125       | ENSG00000183323 | -37   | 0.31 | 0.16 | 0.018 | 0.15   | NA |
| chr5 | 114880113 | 114880772 | FEM1C         | ENSG00000145780 | 149   | 0.21 | 0.13 | 0.018 | 0.082  | NA |
| chr5 | 133339600 | 133341509 | VDAC1         | ENSG00000213585 | -228  | 0.28 | 0.21 | 0.018 | 0.071  | NA |
| chr5 | 162886779 | 162887242 | NUDCD2        | ENSG00000170584 | -168  | 0.19 | 0.32 | 0.018 | -0.13  | NA |
| chr5 | 1799461   | 1801905   | MRPL36        | ENSG00000171421 | -819  | 0.21 | 0.15 | 0.019 | 0.059  | NA |
| chr5 | 140755254 | 140755941 | PCDHGA6       | ENSG00000253731 | 1946  | 0.82 | 0.65 | 0.019 | 0.17   | NA |
| chr5 | 177366538 | 177366973 | RP11-1252I4.2 | ENSG00000250101 | 132   | 0.56 | 0.9  | 0.019 | -0.34  | NA |
| chr5 | 7868863   | 7869840   | FASTKD3       | ENSG00000124279 | -236  | 0.26 | 0.19 | 0.02  | 0.075  | NA |
| chr5 | 49736607  | 49737300  | EMB           | ENSG00000170571 | 231   | 0.34 | 0.23 | 0.023 | 0.11   | NA |
| chr5 | 272139    | 272485    | PDCD6         | ENSG00000249915 | -515  | 0.44 | 0.18 | 0.024 | 0.26   | NA |
| chr5 | 64858775  | 64859283  | CENPK         | ENSG00000123219 | -79   | 0.34 | 0.19 | 0.024 | 0.14   | NA |
| chr5 | 87956489  | 87957187  | CTC-547D20.1  | ENSG00000245526 | -1185 | 0.18 | 0.26 | 0.024 | -0.076 | NA |
| chr5 | 137878264 | 137879425 | ETF1          | ENSG00000120705 | -4    | 0.28 | 0.2  | 0.025 | 0.078  | NA |
| chr5 | 167718523 | 167719688 | WWC1          | ENSG00000113645 | 449   | 0.27 | 0.2  | 0.027 | 0.07   | NA |
| chr5 | 170814447 | 170815655 | NPM1          | ENSG00000181163 | 399   | 0.27 | 0.19 | 0.027 | 0.081  | NA |
| chr5 | 175815288 | 175815847 | NOP16         | ENSG00000048162 | 2     | 0.27 | 0.19 | 0.027 | 0.085  | NA |
| chr5 | 95997717  | 95999117  | CAST          | ENSG00000153113 | 640   | 0.17 | 0.23 | 0.029 | -0.062 | NA |
| chr5 | 110559569 | 110560446 | CAMK4         | ENSG00000152495 | 359   | 0.26 | 0.18 | 0.03  | 0.081  | NA |
| chr5 | 175394926 | 175395383 | THOC3         | ENSG00000051596 | 117   | 0.19 | 0.13 | 0.03  | 0.058  | NA |
| chr5 | 40835241  | 40835873  | RPL37         | ENSG00000145592 | -269  | 0.32 | 0.25 | 0.031 | 0.073  | NA |
| chr5 | 87969960  | 87972070  | CTC-467M3.1   | ENSG00000245864 | -1021 | 0.22 | 0.16 | 0.031 | 0.062  | NA |
| chr5 | 126365623 | 126367250 | 3-Mar         | ENSG00000173926 | -575  | 0.21 | 0.15 | 0.032 | 0.06   | NA |

|      |           |           |               |                 |      |      |      |       |        |    |
|------|-----------|-----------|---------------|-----------------|------|------|------|-------|--------|----|
| chr5 | 127872563 | 127874945 | FBN2          | ENSG00000138829 | -240 | 0.22 | 0.17 | 0.032 | 0.046  | NA |
| chr5 | 140536896 | 140537766 | PCDHB17       | ENSG00000255622 | 1754 | 0.68 | 1    | 0.032 | -0.32  | NA |
| chr5 | 141016320 | 141017685 | HDAC3         | ENSG00000171720 | -610 | 0.24 | 0.18 | 0.033 | 0.066  | NA |
| chr5 | 139725530 | 139726234 | HBEGF         | ENSG00000113070 | 306  | 0.24 | 0.17 | 0.036 | 0.073  | NA |
| chr5 | 1344545   | 1345469   | CLPTM1L       | ENSG00000049656 | -8   | 0.15 | 0.2  | 0.037 | -0.053 | NA |
| chr5 | 14143017  | 14145350  | TRIO          | ENSG00000038382 | 372  | 0.22 | 0.27 | 0.037 | -0.046 | NA |
| chr5 | 171682495 | 171682728 | KLF3P1        | ENSG00000253218 | -168 | 0.98 | 0.92 | 0.04  | 0.067  | NA |
| chr5 | 140568216 | 140569118 | PCDHB9        | ENSG00000177839 | 1774 | 0.71 | 0.56 | 0.042 | 0.16   | NA |
| chr5 | 10760836  | 10761925  | DAP           | ENSG00000112977 | -167 | 0.28 | 0.2  | 0.043 | 0.082  | NA |
| chr5 | 156277302 | 156277685 | CTB-83D3.1    | ENSG00000231989 | -56  | 0.54 | 0.38 | 0.043 | 0.16   | NA |
| chr5 | 43066398  | 43067011  | CTD-2201E18.3 | ENSG00000177738 | 817  | 0.23 | 0.32 | 0.044 | -0.086 | NA |
| chr5 | 137799615 | 137802253 | EGR1          | ENSG00000120738 | -235 | 0.24 | 0.19 | 0.044 | 0.048  | NA |
| chr5 | 140743961 | 140744642 | PCDHGA5       | ENSG00000253485 | 403  | 0.72 | 0.61 | 0.045 | 0.11   | NA |
| chr5 | 178977298 | 178978291 | RUFY1         | ENSG00000176783 | 235  | 0.25 | 0.19 | 0.045 | 0.065  | NA |
| chr5 | 36875927  | 36877660  | CTD-2653M23.2 | ENSG00000248044 | -34  | 0.24 | 0.19 | 0.046 | 0.045  | NA |
| chr5 | 132072695 | 132073429 | KIF3A         | ENSG00000131437 | 49   | 0.32 | 0.21 | 0.046 | 0.11   | NA |
| chr5 | 145214649 | 145215139 | PRELID2       | ENSG00000186314 | -98  | 0.28 | 0.21 | 0.046 | 0.073  | NA |
| chr5 | 179921201 | 179922179 | CNOT6         | ENSG00000113300 | 278  | 0.15 | 0.22 | 0.046 | -0.075 | NA |
| chr5 | 68788151  | 68789823  | OCLN          | ENSG00000197822 | 370  | 0.21 | 0.16 | 0.047 | 0.048  | NA |
| chr5 | 176074138 | 176074623 | TSPAN17       | ENSG00000048140 | -8   | 0.22 | 0.45 | 0.047 | -0.23  | NA |
| chr5 | 102455553 | 102455990 | GIN1          | ENSG00000145723 | 22   | 0.4  | 0.86 | 0.048 | -0.45  | NA |
| chr5 | 79864842  | 79866447  | ANKRD34B      | ENSG00000189127 | 425  | 0.19 | 0.24 | 0.051 | -0.052 | NA |
| chr5 | 176036458 | 176037557 | GPRIN1        | ENSG00000169258 | 127  | 0.23 | 0.18 | 0.051 | 0.054  | NA |
| chr5 | 1201443   | 1202138   | SLC6A19       | ENSG00000174358 | 80   | 0.83 | 0.75 | 0.052 | 0.074  | NA |
| chr5 | 59189046  | 59189894  | PDE4D         | ENSG00000113448 | -358 | 0.26 | 0.19 | 0.052 | 0.077  | NA |
| chr5 | 1003937   | 1005687   | AC116351.2    | ENSG00000221244 | 510  | 0.54 | 0.48 | 0.055 | 0.064  | NA |
| chr5 | 102090439 | 102091241 | PAM           | ENSG00000145730 | 353  | 0.16 | 0.23 | 0.055 | -0.069 | NA |
| chr5 | 115297607 | 115298093 | AC010282.1    | ENSG00000172901 | -301 | 0.32 | 0.18 | 0.055 | 0.15   | NA |
| chr5 | 79330928  | 79331488  | THBS4         | ENSG00000113296 | 37   | 0.31 | 0.17 | 0.056 | 0.13   | NA |
| chr5 | 174178214 | 174178928 | CTD-2532K18.1 | ENSG00000251670 | 264  | 0.32 | 0.2  | 0.056 | 0.12   | NA |

|      |           |           |               |                 |      |      |      |       |        |    |
|------|-----------|-----------|---------------|-----------------|------|------|------|-------|--------|----|
| chr5 | 180649487 | 180649768 | TRIM41        | ENSG00000146063 | 128  | 0.56 | 0.21 | 0.056 | 0.35   | NA |
| chr5 | 131280907 | 131281440 | AC034228.7    | ENSG00000239642 | 25   | 0.91 | 0.83 | 0.058 | 0.076  | NA |
| chr5 | 112823256 | 112824304 | MCC           | ENSG00000171444 | 740  | 0.26 | 0.19 | 0.06  | 0.073  | NA |
| chr5 | 146614283 | 146614560 | CTC-255N20.1  | ENSG00000250343 | 1    | 0.16 | 0.28 | 0.061 | -0.12  | NA |
| chr5 | 132112448 | 132113621 | 8-Sep         | ENSG00000164402 | -122 | 0.22 | 0.17 | 0.063 | 0.054  | NA |
| chr5 | 179125341 | 179126340 | CANX          | ENSG00000127022 | 433  | 0.24 | 0.18 | 0.065 | 0.064  | NA |
| chr5 | 180616157 | 180619114 | CTC-338M12.2  | ENSG00000248473 | 1217 | 0.25 | 0.2  | 0.065 | 0.06   | NA |
| chr5 | 140019034 | 140019502 | TMCO6         | ENSG00000113119 | 230  | 0.7  | 0.23 | 0.068 | 0.47   | NA |
| chr5 | 10307520  | 10307913  | CMBL          | ENSG00000164237 | -56  | 0.17 | 0.3  | 0.069 | -0.14  | NA |
| chr5 | 71603816  | 71604401  | MRPS27        | ENSG00000113048 | -319 | 0.26 | 0.2  | 0.069 | 0.068  | NA |
| chr5 | 94955630  | 94957244  | GPR150        | ENSG00000178015 | 655  | 0.27 | 0.21 | 0.069 | 0.059  | NA |
| chr5 | 171710180 | 171710713 | UBTD2         | ENSG00000168246 | 629  | 0.16 | 0.25 | 0.069 | -0.09  | NA |
| chr5 | 55007836  | 55008368  | SLC38A9       | ENSG00000177058 | -13  | 0.17 | 0.36 | 0.07  | -0.19  | NA |
| chr5 | 133968214 | 133968722 | SAR1B         | ENSG00000152700 | -9   | 0.19 | 0.28 | 0.07  | -0.097 | NA |
| chr5 | 149737077 | 149737830 | TCOF1         | ENSG00000070814 | 251  | 0.33 | 0.22 | 0.07  | 0.11   | NA |
| chr5 | 177580534 | 177581126 | NHP2          | ENSG00000145912 | -250 | 0.3  | 0.15 | 0.07  | 0.15   | NA |
| chr5 | 65439836  | 65440764  | SREK1         | ENSG00000153914 | 254  | 0.29 | 0.23 | 0.071 | 0.062  | NA |
| chr5 | 126853265 | 126853925 | PRRC1         | ENSG00000164244 | 294  | 0.15 | 0.33 | 0.071 | -0.18  | NA |
| chr5 | 140044194 | 140044716 | WDR55         | ENSG00000120314 | 194  | 0.19 | 0.31 | 0.072 | -0.12  | NA |
| chr5 | 472600    | 474261    | CTD-2228K2.5  | ENSG00000188242 | -653 | 0.24 | 0.19 | 0.073 | 0.05   | NA |
| chr5 | 115908397 | 115910792 | SEMA6A        | ENSG00000092421 | 336  | 0.24 | 0.19 | 0.074 | 0.047  | NA |
| chr5 | 60626505  | 60629809  | ZSWIM6        | ENSG00000130449 | 57   | 0.17 | 0.21 | 0.075 | -0.035 | NA |
| chr5 | 176730031 | 176731130 | RAB24         | ENSG00000169228 | 63   | 0.18 | 0.24 | 0.077 | -0.057 | NA |
| chr5 | 77590137  | 77590721  | AP3B1         | ENSG00000132842 | 87   | 0.19 | 0.28 | 0.078 | -0.095 | NA |
| chr5 | 154237008 | 154238362 | CNOT8         | ENSG00000155508 | 572  | 0.23 | 0.17 | 0.078 | 0.058  | NA |
| chr5 | 179049815 | 179051611 | HNRNPH1       | ENSG00000169045 | -548 | 0.32 | 0.27 | 0.079 | 0.046  | NA |
| chr5 | 1226976   | 1227305   | SLC6A18       | ENSG00000164363 | 1616 | 0.98 | 0.82 | 0.081 | 0.17   | NA |
| chr5 | 77655917  | 77656997  | CTD-2037K23.2 | ENSG00000245556 | -240 | 0.17 | 0.22 | 0.081 | -0.053 | NA |
| chr5 | 137688146 | 137689054 | KDM3B         | ENSG00000120733 | 315  | 0.29 | 0.22 | 0.081 | 0.068  | NA |
| chr5 | 157078327 | 157079564 | SOX30         | ENSG00000039600 | 427  | 0.74 | 0.67 | 0.082 | 0.071  | NA |

|      |           |           |              |                 |       |      |      |       |        |    |
|------|-----------|-----------|--------------|-----------------|-------|------|------|-------|--------|----|
| chr5 | 74161536  | 74162716  | FAM169A      | ENSG00000198780 | 43    | 0.29 | 0.23 | 0.083 | 0.06   | NA |
| chr5 | 140725051 | 140725891 | PCDHGA3      | ENSG00000254245 | 1870  | 0.84 | 0.7  | 0.083 | 0.14   | NA |
| chr5 | 176881221 | 176883117 | PRR7         | ENSG00000131188 | 100   | 0.22 | 0.18 | 0.083 | 0.04   | NA |
| chr5 | 1073560   | 1074023   | SLC12A7      | ENSG00000113504 | 1034  | 0.78 | 0.92 | 0.084 | -0.15  | NA |
| chr5 | 75698759  | 75700160  | IQGAP2       | ENSG00000145703 | 385   | 0.22 | 0.27 | 0.085 | -0.049 | NA |
| chr5 | 180673068 | 180673694 | CTC-338M12.4 | ENSG00000233937 | -142  | 0.3  | 0.21 | 0.087 | 0.086  | NA |
| chr5 | 110427777 | 110428270 | CTC-551A13.2 | ENSG00000253613 | -210  | 0.3  | 0.6  | 0.089 | -0.3   | NA |
| chr5 | 14871391  | 14871611  | ANKH         | ENSG00000154122 | 80    | 0.19 | 0.32 | 0.09  | -0.14  | NA |
| chr5 | 146257346 | 146258575 | AC011357.1   | ENSG00000156475 | 184   | 0.21 | 0.15 | 0.091 | 0.061  | NA |
| chr5 | 172386298 | 172386542 | CTC-308K20.1 | ENSG00000204758 | -40   | 0.3  | 0.16 | 0.091 | 0.14   | NA |
| chr5 | 176449499 | 176450115 | UIMC1        | ENSG00000087206 | -204  | 0.22 | 0.13 | 0.092 | 0.085  | NA |
| chr5 | 176778572 | 176779090 | LMAN2        | ENSG00000169223 | -183  | 0.18 | 0.32 | 0.092 | -0.14  | NA |
| chr5 | 1444259   | 1444463   | SLC6A3       | ENSG00000142319 | -1002 | 0.28 | 0.59 | 0.094 | -0.31  | NA |
| chr5 | 176170244 | 176170796 | RP11-375B1.3 | ENSG00000248859 | 314   | 0.18 | 0.26 | 0.094 | -0.087 | NA |
| chr5 | 121647450 | 121648147 | SNCAIP       | ENSG00000064692 | 343   | 0.24 | 0.19 | 0.095 | 0.055  | NA |
| chr5 | 137610105 | 137610311 | GFRA3        | ENSG00000146013 | 46    | 0.5  | 0.14 | 0.095 | 0.36   | NA |
| chr5 | 49962267  | 49963777  | PARP8        | ENSG00000151883 | 500   | 0.32 | 0.26 | 0.096 | 0.061  | NA |
| chr5 | 175788321 | 175788998 | KIAA1191     | ENSG00000122203 | -94   | 0.17 | 0.28 | 0.096 | -0.1   | NA |
| chr5 | 122371569 | 122372822 | RP11-359P5.1 | ENSG00000249996 | 229   | 0.21 | 0.16 | 0.097 | 0.044  | NA |
| chr5 | 149865064 | 149866038 | NDST1        | ENSG00000070614 | 170   | 0.28 | 0.37 | 0.099 | -0.092 | NA |
| chr5 | 523676    | 524887    | SLC9A3       | ENSG00000066230 | 164   | 0.21 | 0.17 | 0.1   | 0.044  | NA |
| chr5 | 28809400  | 28810520  | CTD-2134P3.1 | ENSG00000250453 | -604  | 0.98 | 0.96 | 0.1   | 0.022  | NA |
| chr5 | 72794040  | 72794641  | BTF3         | ENSG00000145741 | 107   | 0.21 | 1    | 0.1   | -0.79  | NA |
| chr5 | 87973951  | 87974294  | CTC-547D20.1 | ENSG00000245526 | 140   | 0.37 | 0.17 | 0.1   | 0.2    | NA |
| chr5 | 118323847 | 118324404 | DTWD2        | ENSG00000169570 | -210  | 0.26 | 0.15 | 0.1   | 0.11   | NA |
| chr5 | 148930249 | 148931244 | CSNK1A1      | ENSG00000113712 | -219  | 0.21 | 0.14 | 0.1   | 0.069  | NA |
| chr5 | 153569545 | 153570538 | GALNT10      | ENSG00000164574 | -249  | 0.23 | 0.18 | 0.1   | 0.05   | NA |
| chr5 | 157285769 | 157286254 | CLINT1       | ENSG00000113282 | 130   | 0.21 | 0.29 | 0.1   | -0.078 | NA |
| chr5 | 171433004 | 171434082 | FBXW11       | ENSG00000072803 | 9     | 0.3  | 0.2  | 0.1   | 0.11   | NA |
| chr5 | 180670373 | 180670996 | GNB2L1       | ENSG00000204628 | 58    | 0.2  | 0.31 | 0.1   | -0.1   | NA |



|      |           |           |               |                 |       |      |      |      |        |    |
|------|-----------|-----------|---------------|-----------------|-------|------|------|------|--------|----|
| chr5 | 33892191  | 33892403  | ADAMTS12      | ENSG00000151388 | 0     | 0.13 | 0.23 | 0.11 | -0.099 | NA |
| chr5 | 52856665  | 52856870  | NDUFS4        | ENSG00000164258 | 262   | 0.29 | 0.5  | 0.11 | -0.21  | NA |
| chr5 | 61601617  | 61602930  | KIF2A         | ENSG00000068796 | 284   | 0.2  | 0.25 | 0.11 | -0.051 | NA |
| chr5 | 112256980 | 112258132 | REEP5         | ENSG00000129625 | -355  | 0.18 | 0.14 | 0.11 | 0.043  | NA |
| chr5 | 115912001 | 115912384 | SEMA6A        | ENSG00000092421 | -1562 | 0.13 | 0.2  | 0.11 | -0.076 | NA |
| chr5 | 134368578 | 134370466 | PITX1         | ENSG00000069011 | -697  | 0.21 | 0.25 | 0.11 | -0.041 | NA |
| chr5 | 140207725 | 140208078 | PCDHA6        | ENSG00000081842 | 251   | 0.67 | 0.55 | 0.11 | 0.11   | NA |
| chr5 | 140720138 | 140720829 | PCDHGA2       | ENSG00000081853 | 1944  | 1    | 0.65 | 0.11 | 0.35   | NA |
| chr5 | 179243545 | 179244453 | SQSTM1        | ENSG00000161011 | -1879 | 0.25 | 0.31 | 0.11 | -0.063 | NA |
| chr5 | 5422125   | 5423251   | KIAA0947      | ENSG00000164151 | -119  | 0.25 | 0.2  | 0.12 | 0.055  | NA |
| chr5 | 31855003  | 31855426  | PDZD2         | ENSG00000133401 | 171   | 0.43 | 0.28 | 0.12 | 0.15   | NA |
| chr5 | 43040845  | 43041161  | AC025171.1    | ENSG00000215068 | -674  | 0.36 | 0.21 | 0.12 | 0.15   | NA |
| chr5 | 67584213  | 67584451  | PIK3R1        | ENSG00000145675 | 136   | 0.19 | 0.32 | 0.12 | -0.13  | NA |
| chr5 | 74532626  | 74532899  | ANKRD31       | ENSG00000145700 | -59   | 0.17 | 1    | 0.12 | -0.83  | NA |
| chr5 | 118604471 | 118604834 | TNFAIP8       | ENSG00000145779 | 203   | 0.22 | 0.15 | 0.12 | 0.07   | NA |
| chr5 | 137910848 | 137911637 | HSPA9         | ENSG00000113013 | -387  | 0.17 | 0.1  | 0.12 | 0.071  | NA |
| chr5 | 175085004 | 175085756 | HRH2          | ENSG00000113749 | 347   | 0.3  | 0.23 | 0.12 | 0.07   | NA |
| chr5 | 1037964   | 1038426   | NKD2          | ENSG00000145506 | 1300  | 0.92 | 0.98 | 0.13 | -0.059 | NA |
| chr5 | 137089253 | 137090878 | HNRNPA0       | ENSG00000177733 | -26   | 0.22 | 0.3  | 0.13 | -0.077 | NA |
| chr5 | 140773855 | 140774441 | PCDHGA8       | ENSG00000253767 | 1767  | 0.85 | 0.72 | 0.13 | 0.13   | NA |
| chr5 | 149681702 | 149682601 | ARSI          | ENSG00000183876 | 365   | 0.25 | 0.31 | 0.13 | -0.059 | NA |
| chr5 | 178421225 | 178422337 | GRM6          | ENSG00000113262 | 343   | 0.2  | 0.24 | 0.13 | -0.048 | NA |
| chr5 | 16179064  | 16180420  | 11-Mar        | ENSG00000183654 | 158   | 0.22 | 0.27 | 0.14 | -0.05  | NA |
| chr5 | 17217788  | 17219021  | BASP1         | ENSG00000176788 | 691   | 0.25 | 0.2  | 0.14 | 0.051  | NA |
| chr5 | 38556222  | 38557563  | LIFR          | ENSG00000113594 | -154  | 0.23 | 0.18 | 0.14 | 0.05   | NA |
| chr5 | 60457840  | 60458654  | CTC-436P18.1  | ENSG00000251279 | 350   | 0.17 | 0.25 | 0.14 | -0.077 | NA |
| chr5 | 79703436  | 79704444  | ZFYVE16       | ENSG00000039319 | 108   | 0.25 | 0.31 | 0.14 | -0.058 | NA |
| chr5 | 125759047 | 125759298 | GRAMD3        | ENSG00000155324 | 74    | 0.24 | 0.16 | 0.14 | 0.079  | NA |
| chr5 | 175816197 | 175816448 | NOP16         | ENSG00000048162 | -346  | 0.27 | 0.13 | 0.14 | 0.13   | NA |
| chr5 | 5139441   | 5140941   | CTD-2297D10.2 | ENSG00000250579 | -24   | 0.24 | 0.18 | 0.15 | 0.065  | NA |

|      |           |           |               |                 |      |      |      |      |        |    |
|------|-----------|-----------|---------------|-----------------|------|------|------|------|--------|----|
| chr5 | 12794972  | 12795647  | RP11-419C19.3 | ENSG00000251112 | -466 | 0.96 | 1    | 0.15 | -0.035 | NA |
| chr5 | 32443753  | 32444923  | ZFR           | ENSG00000056097 | 264  | 0.19 | 0.13 | 0.15 | 0.053  | NA |
| chr5 | 34656123  | 34657330  | RAI14         | ENSG00000039560 | 384  | 0.23 | 0.27 | 0.15 | -0.044 | NA |
| chr5 | 38257825  | 38259136  | EGFLAM        | ENSG00000164318 | -31  | 0.26 | 0.21 | 0.15 | 0.05   | NA |
| chr5 | 54527319  | 54527760  | CCNO          | ENSG00000152669 | 1886 | 0.37 | 0.24 | 0.15 | 0.13   | NA |
| chr5 | 66299768  | 66300083  | AC008872.1    | ENSG00000229666 | -144 | 0.14 | 0.21 | 0.15 | -0.074 | NA |
| chr5 | 76932317  | 76933523  | OTP           | ENSG00000171540 | -102 | 0.27 | 0.22 | 0.15 | 0.055  | NA |
| chr5 | 96038209  | 96038884  | CAST          | ENSG00000153113 | 42   | 0.17 | 0.22 | 0.15 | -0.049 | NA |
| chr5 | 122110539 | 122111169 | SNX2          | ENSG00000205302 | 163  | 0.32 | 0.54 | 0.15 | -0.21  | NA |
| chr5 | 140165958 | 140166214 | PCDHA1        | ENSG00000204970 | 210  | 0.16 | 0.33 | 0.15 | -0.18  | NA |
| chr5 | 148724888 | 148725325 | GRPEL2        | ENSG00000164284 | 113  | 0.37 | 0.21 | 0.15 | 0.16   | NA |
| chr5 | 148737346 | 148737764 | PCYOX1L       | ENSG00000145882 | -15  | 0.21 | 0.14 | 0.15 | 0.07   | NA |
| chr5 | 179232532 | 179234595 | MGAT4B        | ENSG00000161013 | -258 | 0.21 | 0.18 | 0.15 | 0.031  | NA |
| chr5 | 16936753  | 16936957  | MYO10         | ENSG00000145555 | -483 | 0.24 | 0.11 | 0.16 | 0.13   | NA |
| chr5 | 74632476  | 74633673  | CTD-2235C13.2 | ENSG00000247372 | -335 | 0.22 | 0.28 | 0.16 | -0.058 | NA |
| chr5 | 150827102 | 150827500 | SLC36A1       | ENSG00000123643 | 144  | 0.26 | 0.15 | 0.16 | 0.11   | NA |
| chr5 | 34838921  | 34839624  | TTC23L        | ENSG00000205838 | 334  | 0.2  | 0.16 | 0.17 | 0.037  | NA |
| chr5 | 53813379  | 53815306  | SNX18         | ENSG00000178996 | 753  | 0.49 | 0.45 | 0.17 | 0.039  | NA |
| chr5 | 68462675  | 68463214  | CCNB1         | ENSG00000134057 | 107  | 0.19 | 0.26 | 0.17 | -0.079 | NA |
| chr5 | 71402877  | 71404868  | MAP1B         | ENSG00000131711 | 811  | 0.18 | 0.14 | 0.17 | 0.037  | NA |
| chr5 | 112043079 | 112043917 | APC           | ENSG00000134982 | 303  | 0.18 | 0.23 | 0.17 | -0.051 | NA |
| chr5 | 132165472 | 132166679 | SHROOM1       | ENSG00000164403 | 276  | 0.23 | 0.19 | 0.17 | 0.035  | NA |
| chr5 | 138940584 | 138941792 | UBE2D2        | ENSG00000131508 | 437  | 0.21 | 0.18 | 0.17 | 0.034  | NA |
| chr5 | 141703749 | 141705023 | SPRY4         | ENSG00000187678 | -404 | 0.23 | 0.18 | 0.17 | 0.051  | NA |
| chr5 | 43191974  | 43193155  | AC114947.1    | ENSG00000177453 | 391  | 0.17 | 0.26 | 0.18 | -0.089 | NA |
| chr5 | 86708296  | 86708878  | CCNH          | ENSG00000134480 | 80   | 0.12 | 0.18 | 0.18 | -0.054 | NA |
| chr5 | 96270437  | 96272125  | LNPEP         | ENSG00000113441 | 183  | 0.22 | 0.17 | 0.18 | 0.052  | NA |
| chr5 | 139422076 | 139423150 | NRG2          | ENSG00000158458 | 41   | 0.17 | 0.22 | 0.18 | -0.056 | NA |
| chr5 | 167913297 | 167913641 | RARS          | ENSG00000113643 | 19   | 0.36 | 0.2  | 0.18 | 0.16   | NA |
| chr5 | 1633901   | 1634224   | RP11-43F13.1  | ENSG00000188002 | -41  | 0.31 | 0.23 | 0.19 | 0.081  | NA |

|      |           |           |               |                 |       |      |      |      |        |    |
|------|-----------|-----------|---------------|-----------------|-------|------|------|------|--------|----|
| chr5 | 114631986 | 114632302 | CCDC112       | ENSG00000164221 | 176   | 0.23 | 0.16 | 0.19 | 0.072  | NA |
| chr5 | 130970415 | 130971505 | RAPGEF6       | ENSG00000158987 | -237  | 0.26 | 0.35 | 0.19 | -0.094 | NA |
| chr5 | 140719129 | 140719343 | PCDHGA2       | ENSG00000081853 | 697   | 0.85 | 0.7  | 0.19 | 0.15   | NA |
| chr5 | 176236761 | 176238081 | UNC5A         | ENSG00000113763 | -57   | 0.21 | 0.17 | 0.19 | 0.042  | NA |
| chr5 | 177659197 | 177659927 | AGXT2L2       | ENSG00000175309 | -20   | 0.22 | 0.17 | 0.19 | 0.051  | NA |
| chr5 | 180258186 | 180258784 | CTC-205M6.2   | ENSG00000245060 | 120   | 0.25 | 0.19 | 0.19 | 0.062  | NA |
| chr5 | 35617855  | 35618339  | SPEF2         | ENSG00000152582 | 151   | 0.19 | 0.11 | 0.2  | 0.076  | NA |
| chr5 | 95768874  | 95769080  | PCSK1         | ENSG00000175426 | 7     | 0.15 | 0.3  | 0.2  | -0.15  | NA |
| chr5 | 138629162 | 138630308 | SIL1          | ENSG00000120725 | -512  | 0.21 | 0.17 | 0.2  | 0.043  | NA |
| chr5 | 140026826 | 140027504 | NDUFA2        | ENSG00000131495 | -266  | 0.28 | 0.23 | 0.2  | 0.058  | NA |
| chr5 | 160974692 | 160975384 | GABRB2        | ENSG00000145864 | 92    | 0.33 | 0.47 | 0.2  | -0.14  | NA |
| chr5 | 63986189  | 63986974  | FAM159B       | ENSG00000145642 | 312   | 0.15 | 0.2  | 0.21 | -0.042 | NA |
| chr5 | 72112157  | 72113106  | CTD-2631K10.1 | ENSG00000249085 | -239  | 0.16 | 0.19 | 0.21 | -0.031 | NA |
| chr5 | 87968635  | 87968907  | CTC-547D20.1  | ENSG00000245526 | -257  | 0.24 | 0.12 | 0.21 | 0.12   | NA |
| chr5 | 134366913 | 134367438 | PITX1         | ENSG00000069011 | 525   | 0.97 | 0.78 | 0.21 | 0.19   | NA |
| chr5 | 153784641 | 153785130 | GALNT10       | ENSG00000164574 | 1290  | 0.26 | 0.38 | 0.21 | -0.12  | NA |
| chr5 | 25909342  | 25909651  | MSNP1         | ENSG00000251593 | -116  | 0.92 | 0.97 | 0.22 | -0.056 | NA |
| chr5 | 78280317  | 78281300  | ARSB          | ENSG00000113273 | 800   | 0.17 | 0.21 | 0.22 | -0.04  | NA |
| chr5 | 80689818  | 80690228  | ACOT12        | ENSG00000172497 | -61   | 0.2  | 0.15 | 0.22 | 0.046  | NA |
| chr5 | 134734096 | 134735261 | H2AFY         | ENSG00000113648 | 189   | 0.18 | 0.22 | 0.22 | -0.04  | NA |
| chr5 | 138088659 | 138089836 | CTNNA1        | ENSG00000044115 | 461   | 0.19 | 0.23 | 0.22 | -0.038 | NA |
| chr5 | 159545606 | 159546534 | PWWP2A        | ENSG00000170234 | -230  | 0.23 | 0.19 | 0.22 | 0.038  | NA |
| chr5 | 178986513 | 178986999 | RUFY1         | ENSG00000176783 | 63    | 0.2  | 0.3  | 0.22 | -0.098 | NA |
| chr5 | 130330771 | 130331092 | RP11-114H7.2  | ENSG00000250405 | 984   | 0.93 | 0.98 | 0.23 | -0.048 | NA |
| chr5 | 133984171 | 133984994 | SEC24A        | ENSG00000113615 | 103   | 0.31 | 0.24 | 0.23 | 0.063  | NA |
| chr5 | 140475599 | 140476607 | PCDHB2        | ENSG00000112852 | 1876  | 0.75 | 0.6  | 0.23 | 0.15   | NA |
| chr5 | 140558931 | 140559789 | PCDHB16       | ENSG00000196963 | -1620 | 0.65 | 0.84 | 0.23 | -0.19  | NA |
| chr5 | 177614102 | 177614460 | AC136940.3    | ENSG00000244234 | 19    | 0.91 | 0.84 | 0.23 | 0.066  | NA |
| chr5 | 57755334  | 57756803  | PLK2          | ENSG00000145632 | -382  | 0.2  | 0.23 | 0.24 | -0.027 | NA |
| chr5 | 93446953  | 93447436  | FAM172A       | ENSG00000113391 | 146   | 0.19 | 0.11 | 0.24 | 0.078  | NA |

|      |           |           |               |                 |      |      |      |      |        |    |
|------|-----------|-----------|---------------|-----------------|------|------|------|------|--------|----|
| chr5 | 137224986 | 137225477 | RP11-381K20.2 | ENSG00000250159 | -225 | 0.25 | 0.32 | 0.24 | -0.07  | NA |
| chr5 | 142149599 | 142150832 | ARHGAP26      | ENSG00000145819 | 266  | 0.23 | 0.2  | 0.24 | 0.035  | NA |
| chr5 | 172410691 | 172411161 | ATP6V0E1      | ENSG00000113732 | 166  | 0.24 | 0.16 | 0.24 | 0.076  | NA |
| chr5 | 176793959 | 176794841 | RGS14         | ENSG00000169220 | 182  | 0.36 | 0.41 | 0.24 | -0.056 | NA |
| chr5 | 169578    | 169798    | PLEKHG4B      | ENSG00000153404 | 520  | 0.41 | 0.5  | 0.25 | -0.095 | NA |
| chr5 | 1494853   | 1495287   | LPCAT1        | ENSG00000153395 | -177 | 0.96 | 1    | 0.25 | -0.036 | NA |
| chr5 | 6378291   | 6378846   | MED10         | ENSG00000133398 | 116  | 0.17 | 0.28 | 0.25 | -0.1   | NA |
| chr5 | 68485215  | 68485577  | CENPH         | ENSG00000153044 | 21   | 0.17 | 0.25 | 0.25 | -0.074 | NA |
| chr5 | 122424337 | 122424539 | PRDM6         | ENSG00000061455 | -378 | 0.32 | 0.16 | 0.25 | 0.16   | NA |
| chr5 | 128300800 | 128301329 | SLC27A6       | ENSG00000113396 | 243  | 0.13 | 0.2  | 0.25 | -0.068 | NA |
| chr5 | 132298789 | 132299740 | AFF4          | ENSG00000072364 | -59  | 0.15 | 0.12 | 0.25 | 0.032  | NA |
| chr5 | 141488316 | 141488919 | NDFIP1        | ENSG00000131507 | 264  | 0.2  | 0.15 | 0.25 | 0.048  | NA |
| chr5 | 33440635  | 33441365  | CTD-2203K17.1 | ENSG00000249572 | -275 | 0.22 | 0.29 | 0.26 | -0.067 | NA |
| chr5 | 65220759  | 65222416  | ERBB2IP       | ENSG00000112851 | -716 | 0.22 | 0.25 | 0.26 | -0.024 | NA |
| chr5 | 74806581  | 74807974  | COL4A3BP      | ENSG00000113163 | 163  | 0.18 | 0.21 | 0.26 | -0.032 | NA |
| chr5 | 76326120  | 76326871  | AGGF1         | ENSG00000164252 | 285  | 0.22 | 0.14 | 0.26 | 0.078  | NA |
| chr5 | 82768387  | 82769268  | VCAN          | ENSG00000038427 | 1083 | 0.34 | 0.23 | 0.26 | 0.1    | NA |
| chr5 | 177026715 | 177027519 | B4GALT7       | ENSG00000027847 | 16   | 0.23 | 0.19 | 0.26 | 0.046  | NA |
| chr5 | 179779114 | 179781279 | GFPT2         | ENSG00000131459 | -296 | 0.21 | 0.23 | 0.26 | -0.025 | NA |
| chr5 | 1282649   | 1283244   | TERT          | ENSG00000164362 | 179  | 0.8  | 0.75 | 0.27 | 0.044  | NA |
| chr5 | 81267577  | 81268367  | ATG10         | ENSG00000152348 | 128  | 0.24 | 0.19 | 0.27 | 0.047  | NA |
| chr5 | 92939795  | 92940216  | RP11-65F13.3  | ENSG00000250089 | -701 | 0.22 | 0.17 | 0.27 | 0.051  | NA |
| chr5 | 112196849 | 112197247 | SRP19         | ENSG00000153037 | 163  | 0.24 | 0.18 | 0.27 | 0.062  | NA |
| chr5 | 125930601 | 125931049 | ALDH7A1       | ENSG00000164904 | -62  | 0.23 | 0.17 | 0.27 | 0.06   | NA |
| chr5 | 133747366 | 133747799 | CDKN2AIPNL    | ENSG00000237190 | -10  | 0.26 | 0.16 | 0.27 | 0.095  | NA |
| chr5 | 147763283 | 147763666 | RP11-373N22.3 | ENSG00000247199 | -128 | 0.23 | 0.18 | 0.27 | 0.049  | NA |
| chr5 | 151137992 | 151138418 | ATOX1         | ENSG00000177556 | 5    | 0.27 | 0.21 | 0.27 | 0.055  | NA |
| chr5 | 159797388 | 159797697 | C1QTNF2       | ENSG00000145861 | 106  | 0.17 | 0.13 | 0.27 | 0.045  | NA |
| chr5 | 172484040 | 172484413 | C5orf41       | ENSG00000164463 | -121 | 0.25 | 0.38 | 0.27 | -0.13  | NA |
| chr5 | 178286874 | 178287942 | ZNF354B       | ENSG00000178338 | 454  | 0.26 | 0.21 | 0.27 | 0.046  | NA |

|      |           |           |              |                 |       |      |      |      |        |    |
|------|-----------|-----------|--------------|-----------------|-------|------|------|------|--------|----|
| chr5 | 1077844   | 1078056   | SLC12A7      | ENSG00000113504 | -1053 | 0.75 | 1    | 0.28 | -0.25  | NA |
| chr5 | 83679584  | 83680720  | EDIL3        | ENSG00000164176 | 52    | 0.18 | 0.15 | 0.28 | 0.025  | NA |
| chr5 | 121412500 | 121414077 | LOX          | ENSG00000113083 | -419  | 0.16 | 0.19 | 0.28 | -0.03  | NA |
| chr5 | 139283350 | 139284282 | NRG2         | ENSG00000158458 | 79    | 0.23 | 0.18 | 0.28 | 0.047  | NA |
| chr5 | 148206075 | 148206482 | ADRB2        | ENSG00000169252 | 122   | 0.27 | 0.15 | 0.28 | 0.12   | NA |
| chr5 | 157170505 | 157171321 | LSM11        | ENSG00000155858 | 210   | 0.18 | 0.14 | 0.28 | 0.04   | NA |
| chr5 | 32709910  | 32714450  | NPR3         | ENSG00000113389 | 1420  | 0.26 | 0.24 | 0.29 | 0.026  | NA |
| chr5 | 37836747  | 37840726  | GDNF         | ENSG00000168621 | 1046  | 0.24 | 0.22 | 0.29 | 0.02   | NA |
| chr5 | 43040345  | 43040633  | AC025171.1   | ENSG00000215068 | -1188 | 0.35 | 0.27 | 0.29 | 0.083  | NA |
| chr5 | 69321024  | 69321534  | SERF1B       | ENSG00000205572 | 205   | 1    | 0.5  | 0.29 | 0.5    | NA |
| chr5 | 87564608  | 87564881  | TMEM161B     | ENSG00000164180 | -128  | 0.16 | 0.28 | 0.29 | -0.12  | NA |
| chr5 | 142782071 | 142785071 | NR3C1        | ENSG00000113580 | -1269 | 0.2  | 0.22 | 0.29 | -0.028 | NA |
| chr5 | 175625966 | 175626485 | RP11-844P9.2 | ENSG00000248596 | 73    | 0.32 | 0.23 | 0.29 | 0.088  | NA |
| chr5 | 180479585 | 180480959 | BTNL9        | ENSG00000165810 | 487   | 0.18 | 0.21 | 0.29 | -0.031 | NA |
| chr5 | 32173598  | 32174837  | GOLPH3       | ENSG00000113384 | 191   | 0.19 | 0.17 | 0.3  | 0.026  | NA |
| chr5 | 100238722 | 100239138 | ST8SIA4      | ENSG00000113532 | -12   | 0.21 | 0.33 | 0.3  | -0.11  | NA |
| chr5 | 138609320 | 138609851 | MATR3        | ENSG00000015479 | 144   | 0.19 | 0.24 | 0.3  | -0.058 | NA |
| chr5 | 171614430 | 171615939 | STK10        | ENSG00000072786 | 78    | 0.24 | 0.2  | 0.3  | 0.039  | NA |
| chr5 | 176958301 | 176958517 | FAM193B      | ENSG00000146067 | 426   | 0.93 | 1    | 0.3  | -0.074 | NA |
| chr5 | 180688051 | 180688962 | TRIM52       | ENSG00000183718 | -424  | 0.23 | 0.18 | 0.3  | 0.053  | NA |
| chr5 | 880980    | 881277    | BRD9         | ENSG00000028310 | -915  | 0.95 | 1    | 0.31 | -0.055 | NA |
| chr5 | 14581497  | 14582569  | FAM105A      | ENSG00000145569 | 149   | 0.19 | 0.23 | 0.31 | -0.036 | NA |
| chr5 | 37370946  | 37371252  | NUP155       | ENSG00000113569 | 84    | 0.23 | 0.17 | 0.31 | 0.056  | NA |
| chr5 | 54528814  | 54530163  | CCNO         | ENSG00000152669 | -63   | 0.25 | 0.22 | 0.31 | 0.032  | NA |
| chr5 | 56110305  | 56110535  | MAP3K1       | ENSG00000095015 | -981  | 0.35 | 0.2  | 0.31 | 0.15   | NA |
| chr5 | 79286584  | 79287134  | MTX3         | ENSG00000177034 | 209   | 0.26 | 0.5  | 0.31 | -0.24  | NA |
| chr5 | 111093438 | 111093980 | C5orf13      | ENSG00000134986 | 30    | 0.68 | 0.5  | 0.31 | 0.18   | NA |
| chr5 | 150051116 | 150052107 | MYOZ3        | ENSG00000164591 | 391   | 0.44 | 0.35 | 0.31 | 0.087  | NA |
| chr5 | 320788    | 323010    | AHRR         | ENSG00000063438 | 25    | 0.3  | 0.28 | 0.32 | 0.026  | NA |
| chr5 | 1111396   | 1112388   | SLC12A7      | ENSG00000113504 | 258   | 0.18 | 0.21 | 0.32 | -0.032 | NA |

|      |           |           |               |                 |       |      |      |      |        |    |
|------|-----------|-----------|---------------|-----------------|-------|------|------|------|--------|----|
| chr5 | 6712315   | 6714900   | PAPD7         | ENSG00000112941 | -1111 | 0.22 | 0.25 | 0.32 | -0.024 | NA |
| chr5 | 25190503  | 25191113  | RP11-549K20.1 | ENSG00000251273 | -43   | 0.97 | 0.94 | 0.32 | 0.028  | NA |
| chr5 | 74062566  | 74063225  | NSA2          | ENSG00000164346 | 78    | 0.25 | 0.33 | 0.32 | -0.084 | NA |
| chr5 | 76382727  | 76383167  | CTC-564N23.3  | ENSG00000250802 | 108   | 0.21 | 0.15 | 0.32 | 0.051  | NA |
| chr5 | 78531531  | 78533495  | DMGDH         | ENSG00000132837 | -752  | 0.19 | 0.22 | 0.32 | -0.024 | NA |
| chr5 | 139027443 | 139030219 | CXXC5         | ENSG00000171604 | 1342  | 0.24 | 0.22 | 0.32 | 0.023  | NA |
| chr5 | 150284385 | 150284635 | ZNF300        | ENSG00000145908 | 30    | 0.14 | 0.26 | 0.32 | -0.12  | NA |
| chr5 | 177098634 | 177099525 | RP11-1277A3.2 | ENSG00000246596 | 71    | 0.11 | 0.16 | 0.32 | -0.05  | NA |
| chr5 | 178770724 | 178772794 | ADAMTS2       | ENSG00000087116 | 672   | 0.24 | 0.21 | 0.32 | 0.031  | NA |
| chr5 | 60139359  | 60140155  | ELOVL7        | ENSG00000164181 | -392  | 0.21 | 0.17 | 0.33 | 0.039  | NA |
| chr5 | 119799821 | 119800148 | PRR16         | ENSG00000184838 | 11    | 0.17 | 0.22 | 0.33 | -0.048 | NA |
| chr5 | 43017968  | 43018668  | CTD-2035E11.3 | ENSG00000251131 | -213  | 0.16 | 0.25 | 0.34 | -0.095 | NA |
| chr5 | 57878725  | 57879177  | RAB3C         | ENSG00000152932 | 84    | 0.26 | 0.19 | 0.34 | 0.069  | NA |
| chr5 | 71616007  | 71616345  | MRPS27        | ENSG00000113048 | -158  | 0.23 | 0.18 | 0.34 | 0.048  | NA |
| chr5 | 141255564 | 141257968 | PCDH1         | ENSG00000156453 | 1188  | 0.25 | 0.29 | 0.34 | -0.048 | NA |
| chr5 | 169931065 | 169931471 | KCNIP1        | ENSG00000182132 | -96   | 0.19 | 0.26 | 0.35 | -0.072 | NA |
| chr5 | 175792355 | 175793505 | ARL10         | ENSG00000175414 | 459   | 0.22 | 0.25 | 0.35 | -0.033 | NA |
| chr5 | 176738448 | 176739562 | MXD3          | ENSG00000213347 | -134  | 0.22 | 0.18 | 0.35 | 0.041  | NA |
| chr5 | 176918574 | 176919659 | PDLIM7        | ENSG00000196923 | 457   | 0.9  | 0.87 | 0.35 | 0.028  | NA |
| chr5 | 71014917  | 71015715  | CARTPT        | ENSG00000164326 | 326   | 0.29 | 0.24 | 0.36 | 0.048  | NA |
| chr5 | 76011120  | 76012292  | F2R           | ENSG00000181104 | -162  | 0.19 | 0.22 | 0.36 | -0.033 | NA |
| chr5 | 126626053 | 126626901 | MEGF10        | ENSG00000145794 | -46   | 0.27 | 0.32 | 0.36 | -0.047 | NA |
| chr5 | 129239553 | 129241612 | CHSY3         | ENSG00000198108 | 417   | 0.15 | 0.17 | 0.36 | -0.019 | NA |
| chr5 | 141303119 | 141303634 | KIAA0141      | ENSG00000081791 | 3     | 0.22 | 0.33 | 0.36 | -0.12  | NA |
| chr5 | 7850957   | 7851413   | C5orf49       | ENSG00000215217 | 79    | 0.31 | 0.21 | 0.37 | 0.099  | NA |
| chr5 | 43313191  | 43313924  | HMGCS1        | ENSG00000112972 | -231  | 0.17 | 0.29 | 0.37 | -0.12  | NA |
| chr5 | 178367620 | 178368725 | AC104117.1    | ENSG00000248595 | -88   | 0.31 | 0.25 | 0.37 | 0.052  | NA |
| chr5 | 43042107  | 43043477  | AC025171.1    | ENSG00000215068 | 597   | 0.19 | 0.21 | 0.38 | -0.023 | NA |
| chr5 | 79950003  | 79950873  | DHFR          | ENSG00000228716 | -72   | 0.21 | 0.16 | 0.38 | 0.054  | NA |
| chr5 | 118691401 | 118691759 | TNFAIP8       | ENSG00000145779 | -150  | 0.45 | 0.31 | 0.38 | 0.14   | NA |

|      |           |           |               |                 |       |      |      |      |        |    |
|------|-----------|-----------|---------------|-----------------|-------|------|------|------|--------|----|
| chr5 | 176829339 | 176829756 | GRK6          | ENSG00000198055 | -658  | 0.23 | 0.28 | 0.38 | -0.056 | NA |
| chr5 | 180527368 | 180528782 | FOXO1B        | ENSG00000214295 | -409  | 0.38 | 0.28 | 0.38 | 0.099  | NA |
| chr5 | 56246535  | 56248351  | MIER3         | ENSG00000155545 | 496   | 0.23 | 0.21 | 0.39 | 0.02   | NA |
| chr5 | 78809347  | 78810468  | HOMER1        | ENSG00000152413 | 133   | 0.12 | 0.15 | 0.39 | -0.024 | NA |
| chr5 | 96519419  | 96519645  | RP11-155G15.2 | ENSG00000251513 | 229   | 0.28 | 0.17 | 0.39 | 0.1    | NA |
| chr5 | 127418594 | 127420512 | CTC-228N24.3  | ENSG00000245937 | -901  | 0.17 | 0.19 | 0.39 | -0.02  | NA |
| chr5 | 139943835 | 139944477 | APBB3         | ENSG00000113108 | -311  | 0.23 | 0.19 | 0.39 | 0.042  | NA |
| chr5 | 41904032  | 41904629  | C5orf51       | ENSG00000205765 | 40    | 0.2  | 0.16 | 0.4  | 0.037  | NA |
| chr5 | 118788125 | 118788428 | HSD17B4       | ENSG00000133835 | 138   | 0.18 | 0.26 | 0.4  | -0.085 | NA |
| chr5 | 122971758 | 122972008 | KRT18P16      | ENSG00000235275 | 79    | 0.96 | 0.98 | 0.4  | -0.018 | NA |
| chr5 | 134240254 | 134241314 | PCBD2         | ENSG00000132570 | 188   | 0.18 | 0.21 | 0.4  | -0.025 | NA |
| chr5 | 171881182 | 171881547 | SH3PXD2B      | ENSG00000174705 | -2    | 0.22 | 0.44 | 0.4  | -0.23  | NA |
| chr5 | 180017099 | 180019062 | SCGB3A1       | ENSG00000161055 | 83    | 0.2  | 0.18 | 0.4  | 0.02   | NA |
| chr5 | 1339662   | 1340082   | CLPTM1L       | ENSG00000049656 | -1439 | 0.28 | 0.18 | 0.41 | 0.095  | NA |
| chr5 | 34007796  | 34008105  | AMACR         | ENSG00000242110 | 183   | 0.22 | 0.27 | 0.41 | -0.047 | NA |
| chr5 | 60039587  | 60039835  | KRT8P31       | ENSG00000250148 | 1086  | 0.96 | 1    | 0.41 | -0.043 | NA |
| chr5 | 140802399 | 140802832 | PCDHGA11      | ENSG00000253873 | 1820  | 0.8  | 1    | 0.41 | -0.2   | NA |
| chr5 | 149569592 | 149569945 | SLC6A7        | ENSG00000011083 | 120   | 0.17 | 0.23 | 0.41 | -0.061 | NA |
| chr5 | 39721548  | 39721835  | CTD-2120M21.1 | ENSG00000250492 | -76   | 0.98 | 0.94 | 0.42 | 0.038  | NA |
| chr5 | 76787740  | 76788442  | WDR41         | ENSG00000164253 | -263  | 0.19 | 0.22 | 0.42 | -0.027 | NA |
| chr5 | 139780307 | 139782108 | CTC-329D1.2   | ENSG00000249637 | -255  | 0.23 | 0.2  | 0.42 | 0.027  | NA |
| chr5 | 150158223 | 150158654 | C5orf62       | ENSG00000256580 | 306   | 0.18 | 1    | 0.42 | -0.82  | NA |
| chr5 | 156569576 | 156570067 | MED7          | ENSG00000155868 | -35   | 0.17 | 1    | 0.42 | -0.83  | NA |
| chr5 | 168006098 | 168006918 | PANK3         | ENSG00000120137 | -153  | 0.17 | 0.2  | 0.42 | -0.03  | NA |
| chr5 | 112312387 | 112313006 | DCP2          | ENSG00000172795 | 297   | 0.2  | 0.16 | 0.43 | 0.041  | NA |
| chr5 | 146832560 | 146833938 | DPYSL3        | ENSG00000113657 | -21   | 0.27 | 0.24 | 0.43 | 0.03   | NA |
| chr5 | 157098263 | 157099041 | SOX30         | ENSG00000039600 | -164  | 0.36 | 0.4  | 0.43 | -0.048 | NA |
| chr5 | 175223609 | 175224679 | CPLX2         | ENSG00000145920 | 513   | 0.17 | 0.15 | 0.43 | 0.027  | NA |
| chr5 | 176873349 | 176874737 | PRR7          | ENSG00000131188 | 597   | 0.21 | 0.19 | 0.43 | 0.02   | NA |
| chr5 | 179498291 | 179499338 | RNF130        | ENSG00000113269 | -93   | 0.27 | 0.23 | 0.43 | 0.041  | NA |

|      |           |           |              |                 |      |      |      |      |        |    |
|------|-----------|-----------|--------------|-----------------|------|------|------|------|--------|----|
| chr5 | 180650099 | 180650679 | TRIM41       | ENSG00000146063 | 99   | 0.19 | 0.14 | 0.43 | 0.051  | NA |
| chr5 | 892522    | 893479    | BRD9         | ENSG00000028310 | -363 | 0.18 | 0.15 | 0.44 | 0.022  | NA |
| chr5 | 10353400  | 10354512  | 6-Mar        | ENSG00000145495 | 141  | 0.2  | 0.23 | 0.44 | -0.032 | NA |
| chr5 | 31639053  | 31640104  | PDZD2        | ENSG00000133401 | 61   | 0.26 | 0.23 | 0.44 | 0.032  | NA |
| chr5 | 39424892  | 39425320  | C9           | ENSG00000113600 | -136 | 0.18 | 0.24 | 0.44 | -0.064 | NA |
| chr5 | 52284715  | 52285489  | ITGA2        | ENSG00000164171 | -54  | 0.2  | 0.16 | 0.44 | 0.042  | NA |
| chr5 | 55290335  | 55291389  | IL6ST        | ENSG00000134352 | -134 | 0.19 | 0.21 | 0.44 | -0.023 | NA |
| chr5 | 111754477 | 111756222 | EPB41L4A     | ENSG00000129595 | -339 | 0.22 | 0.25 | 0.44 | -0.024 | NA |
| chr5 | 115298350 | 115299137 | AC010282.1   | ENSG00000172901 | 428  | 0.3  | 0.34 | 0.44 | -0.039 | NA |
| chr5 | 173314931 | 173315979 | CPEB4        | ENSG00000113742 | 172  | 0.27 | 0.24 | 0.44 | 0.038  | NA |
| chr5 | 178157189 | 178157826 | ZNF354A      | ENSG00000169131 | 153  | 0.19 | 0.23 | 0.44 | -0.035 | NA |
| chr5 | 36241003  | 36242664  | C5orf33      | ENSG00000152620 | -340 | 0.17 | 0.19 | 0.45 | -0.018 | NA |
| chr5 | 56204962  | 56206344  | C5orf35      | ENSG00000155542 | 566  | 0.21 | 0.18 | 0.45 | 0.029  | NA |
| chr5 | 86564116  | 86564388  | RASA1        | ENSG00000145715 | 170  | 0.19 | 0.25 | 0.45 | -0.057 | NA |
| chr5 | 271527    | 271956    | CTD-2083E4.6 | ENSG00000248925 | -110 | 0.19 | 0.14 | 0.46 | 0.044  | NA |
| chr5 | 109024965 | 109026701 | MAN2A1       | ENSG00000112893 | 766  | 0.19 | 0.22 | 0.46 | -0.023 | NA |
| chr5 | 140346105 | 140346931 | PCDHAC2      | ENSG00000243232 | 698  | 0.17 | 0.14 | 0.46 | 0.032  | NA |
| chr5 | 158758474 | 158758839 | AC008697.1   | ENSG00000249738 | 130  | 0.19 | 0.25 | 0.46 | -0.053 | NA |
| chr5 | 179306108 | 179306346 | TBC1D9B      | ENSG00000197226 | 179  | 0.9  | 0.84 | 0.46 | 0.059  | NA |
| chr5 | 135170271 | 135171156 | SLC25A48     | ENSG00000145832 | 375  | 0.22 | 0.18 | 0.47 | 0.035  | NA |
| chr5 | 170288879 | 170289737 | RANBP17      | ENSG00000204764 | 372  | 0.19 | 0.21 | 0.47 | -0.024 | NA |
| chr5 | 175487567 | 175488430 | FAM153B      | ENSG00000182230 | 306  | 0.18 | 0.24 | 0.47 | -0.058 | NA |
| chr5 | 96143102  | 96143885  | ERAP1        | ENSG00000164307 | 119  | 0.2  | 0.25 | 0.48 | -0.046 | NA |
| chr5 | 134074083 | 134074494 | CAMLG        | ENSG00000164615 | 97   | 0.35 | 0.3  | 0.48 | 0.048  | NA |
| chr5 | 139493595 | 139494541 | PURA         | ENSG00000185129 | 360  | 0.2  | 0.17 | 0.48 | 0.026  | NA |
| chr5 | 140070804 | 140071328 | HARS         | ENSG00000170445 | -185 | 0.29 | 0.33 | 0.48 | -0.042 | NA |
| chr5 | 149512300 | 149512530 | PDGFRB       | ENSG00000113721 | 38   | 0.99 | 0.96 | 0.48 | 0.028  | NA |
| chr5 | 173043123 | 173043895 | BOD1         | ENSG00000145919 | -148 | 0.24 | 0.21 | 0.48 | 0.036  | NA |
| chr5 | 150603213 | 150603753 | CCDC69       | ENSG00000198624 | 170  | 0.2  | 0.17 | 0.49 | 0.035  | NA |
| chr5 | 178450630 | 178451216 | ZNF879       | ENSG00000234284 | 170  | 0.16 | 0.21 | 0.49 | -0.05  | NA |



|      |           |           |               |                 |       |      |      |      |        |    |
|------|-----------|-----------|---------------|-----------------|-------|------|------|------|--------|----|
| chr5 | 52777788  | 52777996  | FST           | ENSG00000134363 | -632  | 0.17 | 0.14 | 0.5  | 0.028  | NA |
| chr5 | 65891877  | 65893539  | MAST4         | ENSG00000069020 | 532   | 0.19 | 0.21 | 0.5  | -0.021 | NA |
| chr5 | 89854290  | 89854956  | GPR98         | ENSG00000164199 | 6     | 0.2  | 0.17 | 0.5  | 0.036  | NA |
| chr5 | 90675822  | 90676930  | ARRDC3        | ENSG00000113369 | -470  | 0.21 | 0.18 | 0.5  | 0.034  | NA |
| chr5 | 110074605 | 110075223 | TMEM232       | ENSG00000186952 | -295  | 0.18 | 0.16 | 0.5  | 0.028  | NA |
| chr5 | 140242073 | 140243007 | AC005609.17   | ENSG00000249034 | 684   | 0.92 | 0.84 | 0.5  | 0.079  | NA |
| chr5 | 40797651  | 40798942  | AC008810.1    | ENSG00000132356 | -46   | 0.27 | 0.22 | 0.51 | 0.045  | NA |
| chr5 | 137368105 | 137368722 | RP11-325L7.1  | ENSG00000246323 | -50   | 0.15 | 0.09 | 0.51 | 0.068  | NA |
| chr5 | 170735169 | 170739863 | RP11-546B8.6  | ENSG00000255373 | -1707 | 0.23 | 0.21 | 0.51 | 0.011  | NA |
| chr5 | 172068286 | 172069174 | NEURL1B       | ENSG00000214357 | 461   | 0.37 | 0.31 | 0.51 | 0.053  | NA |
| chr5 | 128430003 | 128431062 | ISOC1         | ENSG00000066583 | 146   | 0.21 | 0.18 | 0.52 | 0.026  | NA |
| chr5 | 177557550 | 177558393 | RMND5B        | ENSG00000145916 | -26   | 0.18 | 0.16 | 0.52 | 0.021  | NA |
| chr5 | 175969749 | 175971053 | CDHR2         | ENSG00000074276 | -141  | 0.24 | 0.22 | 0.53 | 0.02   | NA |
| chr5 | 173415924 | 173416586 | C5orf47       | ENSG00000185056 | 93    | 0.96 | 0.95 | 0.54 | 0.019  | NA |
| chr5 | 176852953 | 176854125 | GRK6          | ENSG00000198055 | 42    | 0.2  | 0.17 | 0.54 | 0.023  | NA |
| chr5 | 63461448  | 63462106  | RNF180        | ENSG00000164197 | 106   | 0.17 | 0.19 | 0.55 | -0.021 | NA |
| chr5 | 75378974  | 75380796  | SV2C          | ENSG00000122012 | 888   | 0.19 | 0.21 | 0.55 | -0.026 | NA |
| chr5 | 107716309 | 107718301 | FBXL17        | ENSG00000145743 | -641  | 0.22 | 0.2  | 0.55 | 0.017  | NA |
| chr5 | 158523906 | 158524598 | EBF1          | ENSG00000164330 | 379   | 0.38 | 0.34 | 0.55 | 0.034  | NA |
| chr5 | 175874629 | 175875428 | FAF2          | ENSG00000113194 | 399   | 0.26 | 0.23 | 0.55 | 0.031  | NA |
| chr5 | 176893860 | 176894794 | DBN1          | ENSG00000113758 | 272   | 0.93 | 0.95 | 0.55 | -0.019 | NA |
| chr5 | 178415943 | 178416197 | GRM6          | ENSG00000113262 | -97   | 0.98 | 0.95 | 0.55 | 0.025  | NA |
| chr5 | 37248983  | 37249783  | C5orf42       | ENSG00000197603 | 147   | 0.31 | 0.26 | 0.56 | 0.055  | NA |
| chr5 | 76506029  | 76507189  | PDE8B         | ENSG00000113231 | 335   | 0.19 | 0.17 | 0.56 | 0.016  | NA |
| chr5 | 122758658 | 122759330 | CEP120        | ENSG00000168944 | 3     | 0.2  | 0.23 | 0.56 | -0.028 | NA |
| chr5 | 98263746  | 98265531  | CTD-2007H13.3 | ENSG00000248489 | -237  | 0.2  | 0.21 | 0.57 | -0.014 | NA |
| chr5 | 118309296 | 118309521 | CTB-161M19.3  | ENSG00000197744 | -83   | 0.98 | 0.95 | 0.57 | 0.035  | NA |
| chr5 | 110847820 | 110848445 | CTC-426B10.1  | ENSG00000246859 | 208   | 0.22 | 0.29 | 0.58 | -0.066 | NA |
| chr5 | 68855809  | 68856161  | GTF2H2C       | ENSG00000183474 | -50   | 0.15 | 0.3  | 0.59 | -0.15  | NA |
| chr5 | 94619459  | 94621121  | MCTP1         | ENSG00000175471 | -586  | 0.19 | 0.18 | 0.59 | 0.014  | NA |

|      |           |           |               |                 |      |      |      |      |         |    |
|------|-----------|-----------|---------------|-----------------|------|------|------|------|---------|----|
| chr5 | 135692397 | 135693042 | TRPC7         | ENSG00000069018 | 354  | 0.96 | 0.95 | 0.59 | 0.018   | NA |
| chr5 | 138713814 | 138714340 | SLC23A1       | ENSG00000170482 | 1825 | 0.93 | 0.84 | 0.59 | 0.091   | NA |
| chr5 | 174905342 | 174906065 | SFXN1         | ENSG00000164466 | 305  | 0.22 | 0.19 | 0.59 | 0.026   | NA |
| chr5 | 70196442  | 70196952  | SERF1A        | ENSG00000172058 | 205  | 0.38 | 0.23 | 0.6  | 0.14    | NA |
| chr5 | 135415069 | 135415307 | VTRNA2-1      | ENSG00000202030 | 1098 | 0.99 | 0.96 | 0.6  | 0.027   | NA |
| chr5 | 148033472 | 148034080 | HTR4          | ENSG00000164270 | -60  | 0.17 | 0.19 | 0.6  | -0.022  | NA |
| chr5 | 158526133 | 158526431 | EBF1          | ENSG00000164330 | 419  | 0.16 | 0.19 | 0.6  | -0.023  | NA |
| chr5 | 442820    | 443604    | C5orf55       | ENSG00000221990 | 46   | 0.31 | 0.36 | 0.61 | -0.047  | NA |
| chr5 | 138533870 | 138534113 | SIL1          | ENSG00000120725 | -5   | 0.26 | 0.18 | 0.61 | 0.087   | NA |
| chr5 | 176943525 | 176944508 | DDX41         | ENSG00000183258 | -120 | 0.18 | 0.2  | 0.61 | -0.016  | NA |
| chr5 | 20305562  | 20305936  | RP11-420O16.1 | ENSG00000249854 | 75   | 0.97 | 0.98 | 0.62 | -0.0096 | NA |
| chr5 | 172261145 | 172261671 | ERGIC1        | ENSG00000113719 | 130  | 0.15 | 0.13 | 0.62 | 0.027   | NA |
| chr5 | 149828881 | 149829631 | RPS14         | ENSG00000164587 | 3    | 0.25 | 0.22 | 0.63 | 0.024   | NA |
| chr5 | 31532110  | 31532537  | DROSHA        | ENSG00000113360 | -155 | 0.23 | 0.28 | 0.64 | -0.051  | NA |
| chr5 | 65017603  | 65018512  | SGTB          | ENSG00000197860 | -100 | 0.23 | 0.21 | 0.64 | 0.023   | NA |
| chr5 | 177019064 | 177019634 | TMED9         | ENSG00000184840 | 190  | 0.24 | 0.21 | 0.64 | 0.032   | NA |
| chr5 | 179105169 | 179106412 | CANX          | ENSG00000127022 | 161  | 0.22 | 0.2  | 0.64 | 0.023   | NA |
| chr5 | 37379266  | 37379656  | WDR70         | ENSG00000082068 | 147  | 0.33 | 0.25 | 0.65 | 0.079   | NA |
| chr5 | 83017894  | 83018358  | HAPLN1        | ENSG00000145681 | -694 | 0.13 | 0.15 | 0.65 | -0.018  | NA |
| chr5 | 95066876  | 95067812  | RHOBTB3       | ENSG00000164292 | 465  | 0.15 | 0.17 | 0.65 | -0.017  | NA |
| chr5 | 133707020 | 133707892 | UBE2B         | ENSG00000119048 | 296  | 0.19 | 0.22 | 0.65 | -0.023  | NA |
| chr5 | 139936755 | 139937193 | SRA1          | ENSG00000213523 | 57   | 0.21 | 0.18 | 0.65 | 0.032   | NA |
| chr5 | 148650920 | 148651772 | AFAP1L1       | ENSG00000157510 | -88  | 0.21 | 0.19 | 0.65 | 0.016   | NA |
| chr5 | 157117149 | 157118379 | AC008694.3    | ENSG00000253798 | -490 | 0.8  | 0.82 | 0.65 | -0.017  | NA |
| chr5 | 176513886 | 176514433 | FGFR4         | ENSG00000160867 | 272  | 0.17 | 0.16 | 0.65 | 0.018   | NA |
| chr5 | 112849265 | 112849982 | YTHDC2        | ENSG00000047188 | 243  | 0.23 | 0.21 | 0.66 | 0.022   | NA |
| chr5 | 95296368  | 95297438  | ELL2          | ENSG00000118985 | 583  | 0.19 | 0.18 | 0.67 | 0.018   | NA |
| chr5 | 17216489  | 17217036  | AC091878.1    | ENSG00000215196 | 394  | 0.27 | 0.24 | 0.68 | 0.034   | NA |
| chr5 | 53605932  | 53606798  | ARL15         | ENSG00000185305 | -120 | 0.14 | 0.17 | 0.68 | -0.021  | NA |
| chr5 | 56469018  | 56470521  | GPBP1         | ENSG00000062194 | -6   | 0.21 | 0.23 | 0.68 | -0.019  | NA |

|      |           |           |               |                 |      |      |      |      |         |    |
|------|-----------|-----------|---------------|-----------------|------|------|------|------|---------|----|
| chr5 | 71713267  | 71713859  | CTC-349J22.1  | ENSG00000251108 | 247  | 1    | 0.94 | 0.68 | 0.056   | NA |
| chr5 | 132361823 | 132362317 | ZCCHC10       | ENSG00000155329 | 156  | 0.14 | 0.15 | 0.68 | -0.014  | NA |
| chr5 | 133702629 | 133702905 | CDKL3         | ENSG00000006837 | -6   | 0.24 | 0.21 | 0.68 | 0.025   | NA |
| chr5 | 140699898 | 140700495 | TAF7          | ENSG00000178913 | 134  | 0.18 | 0.17 | 0.68 | 0.015   | NA |
| chr5 | 101632049 | 101632373 | SLCO4C1       | ENSG00000173930 | 42   | 0.17 | 0.1  | 0.69 | 0.069   | NA |
| chr5 | 130506330 | 130506786 | LYRM7         | ENSG00000186687 | 55   | 0.41 | 0.29 | 0.69 | 0.12    | NA |
| chr5 | 153418183 | 153418669 | FAM114A2      | ENSG00000055147 | -119 | 0.19 | 0.21 | 0.69 | -0.015  | NA |
| chr5 | 464887    | 465666    | EXOC3         | ENSG00000180104 | 372  | 0.96 | 0.97 | 0.7  | -0.0088 | NA |
| chr5 | 32585603  | 32586365  | SUB1          | ENSG00000113387 | 379  | 0.25 | 0.27 | 0.7  | -0.021  | NA |
| chr5 | 63801781  | 63802605  | RGS7BP        | ENSG00000186479 | 109  | 0.19 | 0.17 | 0.7  | 0.023   | NA |
| chr5 | 82373102  | 82373347  | TMEM167A      | ENSG00000174695 | -38  | 0.2  | 0.22 | 0.7  | -0.023  | NA |
| chr5 | 158690013 | 158690541 | UBLCP1        | ENSG00000164332 | 188  | 0.32 | 0.36 | 0.7  | -0.041  | NA |
| chr5 | 169010593 | 169011175 | CCDC99        | ENSG00000040275 | 246  | 0.3  | 0.32 | 0.7  | -0.024  | NA |
| chr5 | 68665087  | 68665866  | RAD17         | ENSG00000152942 | 356  | 0.23 | 0.21 | 0.71 | 0.021   | NA |
| chr5 | 149109570 | 149111750 | PPARGC1B      | ENSG00000155846 | 799  | 0.19 | 0.2  | 0.71 | -0.0086 | NA |
| chr5 | 34915293  | 34916240  | BRIX1         | ENSG00000113460 | 285  | 0.23 | 0.25 | 0.72 | -0.017  | NA |
| chr5 | 74907286  | 74907770  | ANKDD1B       | ENSG00000189045 | 227  | 0.33 | 0.37 | 0.72 | -0.04   | NA |
| chr5 | 81573833  | 81574295  | RPS23         | ENSG00000186468 | -102 | 0.28 | 0.19 | 0.72 | 0.089   | NA |
| chr5 | 89769625  | 89770856  | POLR3G        | ENSG00000113356 | 364  | 0.26 | 0.24 | 0.72 | 0.018   | NA |
| chr5 | 101834354 | 101834740 | SLCO6A1       | ENSG00000205359 | -193 | 0.96 | 1    | 0.72 | -0.044  | NA |
| chr5 | 122424905 | 122425958 | AC106786.1    | ENSG00000223652 | -441 | 0.15 | 0.16 | 0.72 | -0.012  | NA |
| chr5 | 162864384 | 162865007 | CCNG1         | ENSG00000113328 | 120  | 0.2  | 0.16 | 0.72 | 0.038   | NA |
| chr5 | 6632740   | 6634162   | NSUN2         | ENSG00000037474 | -296 | 0.19 | 0.18 | 0.73 | 0.011   | NA |
| chr5 | 14487930  | 14488536  | TRIO          | ENSG00000038382 | -324 | 0.95 | 0.98 | 0.73 | -0.027  | NA |
| chr5 | 43483519  | 43484555  | C5orf28       | ENSG00000151881 | -99  | 0.21 | 0.23 | 0.73 | -0.013  | NA |
| chr5 | 54522302  | 54523533  | RP11-528L24.3 | ENSG00000234602 | 173  | 0.22 | 0.23 | 0.73 | -0.011  | NA |
| chr5 | 150400000 | 150400490 | GPX3          | ENSG00000211445 | 121  | 0.18 | 0.2  | 0.73 | -0.024  | NA |
| chr5 | 178487146 | 178487921 | ZNF354C       | ENSG00000177932 | 117  | 0.14 | 0.16 | 0.73 | -0.013  | NA |
| chr5 | 179004497 | 179004836 | RUFY1         | ENSG00000176783 | 552  | 0.93 | 0.95 | 0.73 | -0.017  | NA |
| chr5 | 179222608 | 179223825 | LTC4S         | ENSG00000213316 | 660  | 0.24 | 0.25 | 0.73 | -0.011  | NA |

|      |           |           |               |                 |      |      |      |      |         |    |
|------|-----------|-----------|---------------|-----------------|------|------|------|------|---------|----|
| chr5 | 54528095  | 54528404  | CCNO          | ENSG00000152669 | 1176 | 0.26 | 0.22 | 0.74 | 0.044   | NA |
| chr5 | 110408704 | 110409039 | TSLP          | ENSG00000145777 | -141 | 0.23 | 0.2  | 0.74 | 0.033   | NA |
| chr5 | 176860862 | 176861098 | GRK6          | ENSG00000198055 | 1746 | 0.95 | 1    | 0.74 | -0.045  | NA |
| chr5 | 39073881  | 39075236  | RICTOR        | ENSG00000164327 | -67  | 0.19 | 0.2  | 0.75 | -0.016  | NA |
| chr5 | 87980878  | 87981272  | CTC-547D20.1  | ENSG00000245526 | -322 | 0.25 | 0.23 | 0.75 | 0.022   | NA |
| chr5 | 180397288 | 180397563 | CTD-2593A12.3 | ENSG00000249287 | 337  | 1    | 0.98 | 0.75 | 0.022   | NA |
| chr5 | 7289733   | 7290153   | RP11-404K5.1  | ENSG00000247732 | -993 | 0.98 | 0.97 | 0.76 | 0.01    | NA |
| chr5 | 40679502  | 40682081  | PTGER4        | ENSG00000171522 | 1191 | 0.21 | 0.22 | 0.76 | -0.0076 | NA |
| chr5 | 74348241  | 74349681  | RP11-229C3.2  | ENSG00000250889 | -493 | 0.18 | 0.17 | 0.76 | 0.0086  | NA |
| chr5 | 80597320  | 80597734  | CTC-281B15.1  | ENSG00000247572 | -185 | 0.18 | 0.15 | 0.76 | 0.029   | NA |
| chr5 | 98104578  | 98106270  | RGMB          | ENSG00000174136 | 426  | 0.28 | 0.26 | 0.76 | 0.018   | NA |
| chr5 | 131346892 | 131347776 | AC034228.2    | ENSG00000231585 | 193  | 0.2  | 0.22 | 0.76 | -0.018  | NA |
| chr5 | 131825842 | 131826935 | IRF1          | ENSG00000125347 | -463 | 0.16 | 0.17 | 0.76 | -0.0084 | NA |
| chr5 | 132946744 | 132948467 | FSTL4         | ENSG00000053108 | 618  | 0.22 | 0.23 | 0.76 | -0.0094 | NA |
| chr5 | 135265848 | 135266517 | FBXL21        | ENSG00000164616 | 176  | 0.19 | 0.2  | 0.76 | -0.014  | NA |
| chr5 | 175298515 | 175300066 | CPLX2         | ENSG00000145920 | 709  | 0.24 | 0.23 | 0.76 | 0.011   | NA |
| chr5 | 1467831   | 1468263   | LPCAT1        | ENSG00000153395 | -607 | 0.79 | 0.84 | 0.77 | -0.048  | NA |
| chr5 | 139227605 | 139228279 | CTB-35F21.4   | ENSG00000250692 | 67   | 0.16 | 0.17 | 0.77 | -0.011  | NA |
| chr5 | 179285250 | 179286416 | C5orf45       | ENSG00000161010 | -36  | 0.18 | 0.2  | 0.77 | -0.015  | NA |
| chr5 | 92007     | 92438     | CTD-2231H16.1 | ENSG00000249430 | -44  | 0.27 | 0.28 | 0.78 | -0.016  | NA |
| chr5 | 72746989  | 72747587  | RP11-79P5.7   | ENSG00000251604 | -35  | 0.23 | 0.25 | 0.78 | -0.02   | NA |
| chr5 | 149339931 | 149340951 | SLC26A2       | ENSG00000155850 | 141  | 0.18 | 0.17 | 0.78 | 0.011   | NA |
| chr5 | 176734599 | 176734944 | MXD3          | ENSG00000213347 | 292  | 0.86 | 0.83 | 0.78 | 0.024   | NA |
| chr5 | 54468783  | 54469324  | CDC20B        | ENSG00000164287 | -210 | 0.22 | 0.2  | 0.79 | 0.022   | NA |
| chr5 | 79783635  | 79784145  | CTD-2015H6.3  | ENSG00000249042 | -118 | 0.21 | 0.2  | 0.79 | 0.014   | NA |
| chr5 | 143584743 | 143585064 | KCTD16        | ENSG00000183775 | 63   | 0.28 | 0.32 | 0.79 | -0.047  | NA |
| chr5 | 150080131 | 150080703 | RBM22         | ENSG00000086589 | -234 | 0.24 | 0.23 | 0.79 | 0.012   | NA |
| chr5 | 176693340 | 176693631 | NSD1          | ENSG00000165671 | 104  | 0.97 | 0.99 | 0.79 | -0.017  | NA |
| chr5 | 113391071 | 113392005 | RP11-371M22.1 | ENSG00000251628 | -165 | 0.25 | 0.24 | 0.8  | 0.017   | NA |
| chr5 | 139927157 | 139927491 | EIF4EBP3      | ENSG00000243056 | 73   | 0.21 | 0.19 | 0.8  | 0.015   | NA |

|      |           |           |              |                 |       |      |      |      |         |    |
|------|-----------|-----------|--------------|-----------------|-------|------|------|------|---------|----|
| chr5 | 52083946  | 52084287  | CTD-2288O8.1 | ENSG00000248898 | -256  | 0.27 | 0.24 | 0.81 | 0.031   | NA |
| chr5 | 108083987 | 108085203 | FER          | ENSG00000151422 | 495   | 0.2  | 0.2  | 0.81 | -0.0087 | NA |
| chr5 | 150537019 | 150537418 | ANXA6        | ENSG00000197043 | 90    | 0.16 | 0.19 | 0.81 | -0.03   | NA |
| chr5 | 474958    | 475319    | CTD-2228K2.5 | ENSG00000188242 | -1925 | 0.2  | 0.22 | 0.82 | -0.021  | NA |
| chr5 | 92919558  | 92921430  | RP11-65F13.2 | ENSG00000237187 | 860   | 0.2  | 0.2  | 0.82 | -0.0055 | NA |
| chr5 | 140595008 | 140595880 | PCDHB13      | ENSG00000187372 | 1748  | 0.66 | 0.63 | 0.82 | 0.027   | NA |
| chr5 | 141348531 | 141349104 | RNF14        | ENSG00000013561 | 213   | 0.18 | 0.2  | 0.82 | -0.023  | NA |
| chr5 | 141392360 | 141392587 | GNPDA1       | ENSG00000113552 | 65    | 0.16 | 0.18 | 0.82 | -0.022  | NA |
| chr5 | 148520992 | 148521467 | ABLIM3       | ENSG00000173210 | 183   | 0.23 | 0.21 | 0.82 | 0.015   | NA |
| chr5 | 41869663  | 41870876  | CTD-2062O1.3 | ENSG00000248668 | 137   | 0.21 | 0.2  | 0.83 | 0.0097  | NA |
| chr5 | 122736626 | 122736987 | KRT8P33      | ENSG00000250539 | 1232  | 0.99 | 0.97 | 0.83 | 0.015   | NA |
| chr5 | 1064132   | 1064468   | SLC12A7      | ENSG00000113504 | -303  | 0.9  | 0.92 | 0.84 | -0.012  | NA |
| chr5 | 32312338  | 32313469  | MTMR12       | ENSG00000150712 | 127   | 0.2  | 0.19 | 0.84 | 0.011   | NA |
| chr5 | 36151497  | 36152379  | LMBRD2       | ENSG00000164187 | 73    | 0.21 | 0.18 | 0.84 | 0.029   | NA |
| chr5 | 37834671  | 37835128  | GDNF         | ENSG00000168621 | 111   | 0.17 | 0.22 | 0.84 | -0.051  | NA |
| chr5 | 73980913  | 73981521  | HEXB         | ENSG00000049860 | 248   | 0.18 | 0.19 | 0.84 | -0.016  | NA |
| chr5 | 139174904 | 139176172 | PSD2         | ENSG00000146005 | 132   | 0.18 | 0.17 | 0.84 | 0.0066  | NA |
| chr5 | 141030918 | 141031177 | FCHSD1       | ENSG00000197948 | -104  | 0.13 | 0.16 | 0.84 | -0.028  | NA |
| chr5 | 154317459 | 154317930 | GEMIN5       | ENSG00000082516 | 75    | 0.18 | 0.21 | 0.84 | -0.023  | NA |
| chr5 | 125936522 | 125937100 | PHAX         | ENSG00000164902 | 194   | 0.15 | 0.14 | 0.85 | 0.012   | NA |
| chr5 | 154134139 | 154137009 | LARP1        | ENSG00000155506 | 439   | 0.23 | 0.22 | 0.85 | 0.0051  | NA |
| chr5 | 169659830 | 169660229 | C5orf58      | ENSG00000234511 | 85    | 0.96 | 1    | 0.85 | -0.036  | NA |
| chr5 | 179334344 | 179335115 | TBC1D9B      | ENSG00000197226 | 123   | 0.27 | 0.26 | 0.85 | 0.012   | NA |
| chr5 | 180229375 | 180230147 | MGAT1        | ENSG00000131446 | 6     | 0.22 | 0.23 | 0.85 | -0.0098 | NA |
| chr5 | 41925289  | 41925716  | FBXO4        | ENSG00000151876 | 146   | 0.42 | 0.5  | 0.86 | -0.083  | NA |
| chr5 | 115420581 | 115421165 | COMMD10      | ENSG00000145781 | 185   | 0.26 | 0.22 | 0.86 | 0.035   | NA |
| chr5 | 180055849 | 180056126 | FLT4         | ENSG00000037280 | 351   | 0.94 | 1    | 0.86 | -0.059  | NA |
| chr5 | 72860959  | 72861610  | ANKRA2       | ENSG00000164331 | -255  | 0.28 | 0.27 | 0.87 | 0.012   | NA |
| chr5 | 81045904  | 81047849  | SSBP2        | ENSG00000145687 | -300  | 0.21 | 0.22 | 0.87 | -0.0061 | NA |
| chr5 | 131629230 | 131630797 | SLC22A4      | ENSG00000197208 | -123  | 0.21 | 0.21 | 0.87 | -0.006  | NA |

|      |           |           |              |                 |      |      |      |      |         |    |
|------|-----------|-----------|--------------|-----------------|------|------|------|------|---------|----|
| chr5 | 42424338  | 42425047  | GHR          | ENSG00000112964 | 72   | 0.18 | 0.29 | 0.88 | -0.1    | NA |
| chr5 | 76249435  | 76250528  | CRHBP        | ENSG00000145708 | 739  | 0.21 | 0.2  | 0.88 | 0.0051  | NA |
| chr5 | 118406744 | 118407442 | DMXL1        | ENSG00000172869 | 193  | 0.17 | 0.19 | 0.88 | -0.012  | NA |
| chr5 | 10249760  | 10251000  | FAM173B      | ENSG00000150756 | -383 | 0.25 | 0.23 | 0.89 | 0.013   | NA |
| chr5 | 16616509  | 16617428  | FAM134B      | ENSG00000154153 | 179  | 0.18 | 0.17 | 0.89 | 0.0065  | NA |
| chr5 | 70751401  | 70751887  | BDP1         | ENSG00000145734 | 202  | 0.18 | 0.17 | 0.89 | 0.017   | NA |
| chr5 | 88185224  | 88185589  | CTC-454M9.1  | ENSG00000248309 | 144  | 0.36 | 0.4  | 0.89 | -0.042  | NA |
| chr5 | 93953913  | 93954843  | ANKRD32      | ENSG00000133302 | 326  | 0.28 | 0.27 | 0.89 | 0.0079  | NA |
| chr5 | 157001468 | 157001756 | ADAM19       | ENSG00000135074 | 1137 | 0.38 | 0.5  | 0.89 | -0.12   | NA |
| chr5 | 176827081 | 176827754 | PFN3         | ENSG00000196570 | 220  | 0.18 | 0.19 | 0.89 | -0.013  | NA |
| chr5 | 134870740 | 134872051 | NEUROG1      | ENSG00000181965 | 244  | 0.23 | 0.23 | 0.9  | 0.0037  | NA |
| chr5 | 157002174 | 157003182 | ADAM19       | ENSG00000135074 | 71   | 0.22 | 0.21 | 0.9  | 0.009   | NA |
| chr5 | 87985470  | 87985810  | CTC-547D20.1 | ENSG00000245526 | 1218 | 0.18 | 0.2  | 0.91 | -0.018  | NA |
| chr5 | 126112229 | 126114229 | LMNB1        | ENSG00000113368 | 914  | 0.21 | 0.21 | 0.91 | -0.0034 | NA |
| chr5 | 156886969 | 156887440 | NIPAL4       | ENSG00000172548 | 177  | 0.25 | 0.26 | 0.91 | -0.014  | NA |
| chr5 | 157158378 | 157158856 | THG1L        | ENSG00000113272 | 189  | 0.18 | 0.16 | 0.91 | 0.016   | NA |
| chr5 | 177433281 | 177434067 | FAM153C      | ENSG00000204677 | 268  | 0.25 | 0.11 | 0.91 | 0.14    | NA |
| chr5 | 43120926  | 43122005  | ZNF131       | ENSG00000172262 | 480  | 0.19 | 0.19 | 0.92 | -0.0052 | NA |
| chr5 | 145582725 | 145583511 | RBM27        | ENSG00000091009 | 5    | 0.28 | 0.29 | 0.92 | -0.014  | NA |
| chr5 | 169533080 | 169533534 | FOXI1        | ENSG00000168269 | 390  | 0.95 | 0.94 | 0.92 | 0.01    | NA |
| chr5 | 45695394  | 45696510  | HCN1         | ENSG00000164588 | 301  | 0.18 | 0.17 | 0.93 | 0.0077  | NA |
| chr5 | 112630219 | 112630624 | MCC          | ENSG00000171444 | 214  | 0.19 | 0.2  | 0.93 | -0.017  | NA |
| chr5 | 140201440 | 140201657 | PCDHA5       | ENSG00000204965 | 187  | 0.56 | 0.58 | 0.93 | -0.02   | NA |
| chr5 | 1594238   | 1595027   | SDHAP3       | ENSG00000185986 | 103  | 0.19 | 0.2  | 0.94 | -0.0067 | NA |
| chr5 | 159343215 | 159343574 | ADRA1B       | ENSG00000170214 | -396 | 0.19 | 0.22 | 0.94 | -0.032  | NA |
| chr5 | 60240779  | 60241490  | ERCC8        | ENSG00000049167 | -256 | 0.29 | 0.25 | 0.95 | 0.041   | NA |
| chr5 | 159738781 | 159739913 | CCNJL        | ENSG00000135083 | 136  | 0.23 | 0.22 | 0.95 | 0.0044  | NA |
| chr5 | 54603209  | 54603904  | DHX29        | ENSG00000067248 | -188 | 0.21 | 0.2  | 0.96 | 0.01    | NA |
| chr5 | 54830148  | 54831120  | PPAP2A       | ENSG00000067113 | 145  | 0.2  | 0.2  | 0.96 | 0.0034  | NA |
| chr5 | 59995374  | 59996331  | DEPDC1B      | ENSG00000035499 | 109  | 0.16 | 0.16 | 0.96 | -0.0037 | NA |

|      |           |           |               |                 |       |      |      |      |         |    |
|------|-----------|-----------|---------------|-----------------|-------|------|------|------|---------|----|
| chr5 | 72921593  | 72922527  | RP11-428C6.1  | ENSG00000214944 | 77    | 0.2  | 0.2  | 0.96 | 0.0051  | NA |
| chr5 | 77071645  | 77072303  | TBCA          | ENSG00000171530 | 111   | 0.25 | 0.24 | 0.96 | 0.0055  | NA |
| chr5 | 78908219  | 78908691  | PAPD4         | ENSG00000164329 | 212   | 0.26 | 0.28 | 0.96 | -0.014  | NA |
| chr5 | 31193952  | 31194419  | CDH6          | ENSG00000113361 | 309   | 0.29 | 0.28 | 0.97 | 0.012   | NA |
| chr5 | 68513514  | 68514200  | MRPS36        | ENSG00000134056 | 270   | 0.33 | 0.32 | 0.98 | 0.0095  | NA |
| chr5 | 76934581  | 76935296  | OTP           | ENSG00000171540 | -416  | 0.12 | 0.13 | 0.98 | -0.0096 | NA |
| chr5 | 130599335 | 130600406 | CDC42SE2      | ENSG00000158985 | 511   | 0.17 | 0.18 | 0.98 | -0.0045 | NA |
| chr5 | 176056520 | 176057494 | SNCB          | ENSG00000074317 | -12   | 0.32 | 0.31 | 0.98 | 0.0078  | NA |
| chr5 | 180650917 | 180651121 | TRIM41        | ENSG00000146063 | -20   | 0.24 | 0.27 | 0.98 | -0.031  | NA |
| chr5 | 40755537  | 40756257  | TTC33         | ENSG00000113638 | 150   | 0.2  | 0.21 | 0.99 | -0.011  | NA |
| chr5 | 55776604  | 55777233  | CTC-236F12.4  | ENSG00000248727 | 678   | 0.25 | 0.26 | 0.99 | -0.014  | NA |
| chr5 | 80255904  | 80257006  | RASGRF2       | ENSG00000113319 | -36   | 0.19 | 0.2  | 0.99 | -0.0037 | NA |
| chr5 | 111496407 | 111497040 | NCRNA00219    | ENSG00000224032 | 134   | 0.21 | 0.21 | 0.99 | -0.0071 | NA |
| chr5 | 172754056 | 172757098 | STC2          | ENSG00000113739 | -521  | 0.22 | 0.22 | 0.99 | 0.0014  | NA |
| chr5 | 218036    | 219128    | CCDC127       | ENSG00000164366 | -252  | 0.21 | 0.21 | 1    | 0.00035 | NA |
| chr5 | 1080029   | 1080491   | SLC12A7       | ENSG00000113504 | 1513  | 0.92 | 0.91 | 1    | 0.0068  | NA |
| chr5 | 1335077   | 1335280   | CLPTM1L       | ENSG00000049656 | 58    | 0.97 | 0.98 | 1    | -0.0012 | NA |
| chr5 | 1466074   | 1466457   | LPCAT1        | ENSG00000153395 | 1175  | 0.94 | 1    | 1    | -0.061  | NA |
| chr5 | 1553035   | 1553269   | CTD-2245E15.3 | ENSG00000251532 | -1327 | 0.17 | 0.13 | 1    | 0.035   | NA |
| chr5 | 1851342   | 1851564   | CTD-2194D22.1 | ENSG00000249966 | 389   | 0.27 | 0.29 | 1    | -0.021  | NA |
| chr5 | 10441605  | 10442512  | ROPN1L        | ENSG00000145491 | 422   | 0.21 | 0.21 | 1    | 0.0031  | NA |
| chr5 | 15500076  | 15500923  | FBXL7         | ENSG00000183580 | 194   | 0.18 | 0.18 | 1    | 0.0014  | NA |
| chr5 | 15936641  | 15937316  | MIR887        | ENSG00000216077 | 1687  | 0.98 | 0.98 | 1    | -0.0012 | NA |
| chr5 | 16465238  | 16466460  | ZNF622        | ENSG00000173545 | 52    | 0.32 | 0.32 | 1    | -0.0039 | NA |
| chr5 | 17491457  | 17491873  | RP11-321E2.13 | ENSG00000249165 | 213   | 0.99 | 0.98 | 1    | 0.0053  | NA |
| chr5 | 17655252  | 17655723  | RP11-432M8.17 | ENSG00000248945 | 254   | 0.98 | 1    | 1    | -0.02   | NA |
| chr5 | 26669548  | 26669904  | CTD-2533K21.3 | ENSG00000230571 | 271   | 0.97 | 0.97 | 1    | -0.0054 | NA |
| chr5 | 33502054  | 33502363  | CTD-2233C11.3 | ENSG00000249360 | 31    | 0.96 | 0.95 | 1    | 0.0087  | NA |
| chr5 | 43556419  | 43557603  | PAIP1         | ENSG00000172239 | -531  | 0.21 | 0.21 | 1    | 0.00065 | NA |
| chr5 | 43602977  | 43603650  | RP11-159F24.1 | ENSG00000248092 | -274  | 0.22 | 0.23 | 1    | -0.0062 | NA |

|      |           |           |               |                 |      |      |      |   |         |    |
|------|-----------|-----------|---------------|-----------------|------|------|------|---|---------|----|
| chr5 | 61708394  | 61709056  | IPO11         | ENSG00000086200 | 237  | 0.24 | 0.24 | 1 | 0.0041  | NA |
| chr5 | 64919914  | 64920288  | TRIM23        | ENSG00000113595 | 22   | 0.33 | 0.33 | 1 | -0.0053 | NA |
| chr5 | 75469968  | 75470173  | RP11-466P24.2 | ENSG00000254893 | -62  | 1    | 1    | 1 | 0       | NA |
| chr5 | 77943868  | 77945220  | LHFPL2        | ENSG00000145685 | -104 | 0.2  | 0.2  | 1 | -0.0027 | NA |
| chr5 | 83678137  | 83678394  | EDIL3         | ENSG00000164176 | 1939 | 0.5  | 1    | 1 | -0.5    | NA |
| chr5 | 87898488  | 87898736  | CTC-470C15.1  | ENSG00000250705 | 14   | 0.95 | 0.96 | 1 | -0.014  | NA |
| chr5 | 88179866  | 88180258  | MEF2C         | ENSG00000081189 | 323  | 0.28 | 0.27 | 1 | 0.0035  | NA |
| chr5 | 89825116  | 89825804  | GPR98         | ENSG00000164199 | 299  | 0.17 | 0.18 | 1 | -0.0094 | NA |
| chr5 | 90576347  | 90576629  | RP11-213H15.1 | ENSG00000234292 | 471  | 0.13 | 0.11 | 1 | 0.024   | NA |
| chr5 | 94890407  | 94891169  | TTC37         | ENSG00000198677 | -140 | 0.16 | 0.17 | 1 | -0.0092 | NA |
| chr5 | 94982329  | 94982694  | RFESD         | ENSG00000175449 | 53   | 0.22 | 0.21 | 1 | 0.0089  | NA |
| chr5 | 98108678  | 98110307  | CTC-463N11.3  | ENSG00000246763 | -716 | 0.2  | 0.21 | 1 | -0.0025 | NA |
| chr5 | 102594435 | 102595550 | C5orf30       | ENSG00000181751 | 255  | 0.22 | 0.22 | 1 | -0.0016 | NA |
| chr5 | 109220986 | 109221247 | AC011366.4    | ENSG00000253224 | 8    | 0.98 | 0.98 | 1 | 0.0051  | NA |
| chr5 | 114504910 | 114506598 | TRIM36        | ENSG00000152503 | -327 | 0.2  | 0.2  | 1 | -0.0022 | NA |
| chr5 | 115783075 | 115783425 | CTB-118N6.3   | ENSG00000248445 | 7    | 0.97 | 0.98 | 1 | -0.011  | NA |
| chr5 | 119800971 | 119801194 | PRR16         | ENSG00000184838 | -244 | 0.28 | 0.33 | 1 | -0.052  | NA |
| chr5 | 121187387 | 121188124 | FTMT          | ENSG00000181867 | 105  | 0.98 | 0.98 | 1 | 0.0023  | NA |
| chr5 | 122847661 | 122848292 | CSNK1G3       | ENSG00000151292 | 183  | 0.22 | 0.21 | 1 | 0.011   | NA |
| chr5 | 127871958 | 127872263 | FBN2          | ENSG00000138829 | 1404 | 0.54 | 0.53 | 1 | 0.0076  | NA |
| chr5 | 131746225 | 131746876 | C5orf56       | ENSG00000197536 | 222  | 0.24 | 0.24 | 1 | -0.0009 | NA |
| chr5 | 131892564 | 131892957 | RAD50         | ENSG00000113522 | 144  | 0.18 | 0.18 | 1 | -0.0033 | NA |
| chr5 | 132201901 | 132202753 | GDF9          | ENSG00000164404 | -89  | 0.3  | 0.31 | 1 | -0.0055 | NA |
| chr5 | 134181483 | 134182250 | C5orf24       | ENSG00000181904 | 188  | 0.23 | 0.22 | 1 | 0.0061  | NA |
| chr5 | 135364507 | 135365036 | TGFBI         | ENSG00000120708 | 187  | 0.11 | 0.11 | 1 | -0.0043 | NA |
| chr5 | 135416204 | 135416475 | VTRNA2-1      | ENSG00000202030 | -53  | 0.8  | 0.6  | 1 | 0.2     | NA |
| chr5 | 135468349 | 135469162 | SMAD5         | ENSG00000113658 | 221  | 0.17 | 0.17 | 1 | 0.001   | NA |
| chr5 | 137673380 | 137674328 | FAM53C        | ENSG00000120709 | 150  | 0.27 | 0.29 | 1 | -0.024  | NA |
| chr5 | 138677333 | 138678248 | PAIP2         | ENSG00000120727 | 269  | 0.24 | 0.24 | 1 | 0.0021  | NA |
| chr5 | 139486931 | 139487672 | CTB-131B5.4   | ENSG00000245146 | -250 | 0.23 | 0.23 | 1 | 0.005   | NA |



|      |           |           |              |                 |      |      |      |    |         |    |
|------|-----------|-----------|--------------|-----------------|------|------|------|----|---------|----|
| chr5 | 139492723 | 139492966 | PURA         | ENSG00000185129 | 331  | 0.09 | 0.13 | 1  | -0.04   | NA |
| chr5 | 140261884 | 140262153 | PCDHA13      | ENSG00000239389 | 164  | 1    | 0.9  | 1  | 0.1     | NA |
| chr5 | 140502890 | 140503804 | PCDHB4       | ENSG00000081818 | 1766 | 0.83 | 0.75 | 1  | 0.078   | NA |
| chr5 | 140573423 | 140574316 | PCDHB10      | ENSG00000120324 | 1927 | 0.46 | 0.5  | 1  | -0.042  | NA |
| chr5 | 146888750 | 146889840 | DPYSL3       | ENSG00000113657 | -197 | 0.19 | 0.2  | 1  | -0.0041 | NA |
| chr5 | 148960797 | 148961203 | ARHGEF37     | ENSG00000183111 | -36  | 0.24 | 0.25 | 1  | -0.011  | NA |
| chr5 | 149379964 | 149380802 | TIGD6        | ENSG00000164296 | -167 | 0.22 | 0.22 | 1  | -0.001  | NA |
| chr5 | 150460086 | 150460864 | TNIP1        | ENSG00000145901 | 101  | 0.2  | 0.2  | 1  | -0.0041 | NA |
| chr5 | 153825417 | 153826526 | SAP30L       | ENSG00000164576 | 454  | 0.2  | 0.2  | 1  | 0.001   | NA |
| chr5 | 158527374 | 158527983 | RP11-175K6.1 | ENSG00000245812 | 187  | 0.34 | 0.35 | 1  | -0.012  | NA |
| chr5 | 159826808 | 159827111 | C5orf54      | ENSG00000221886 | 84   | 0.23 | 0.18 | 1  | 0.051   | NA |
| chr5 | 159845996 | 159846260 | SLU7         | ENSG00000164609 | -40  | 0.24 | 0.25 | 1  | -0.014  | NA |
| chr5 | 162932454 | 162932946 | MAT2B        | ENSG00000038274 | 146  | 0.21 | 0.22 | 1  | -0.005  | NA |
| chr5 | 171711372 | 171711583 | UBTD2        | ENSG00000168246 | -402 | 1    | 1    | 1  | 0       | NA |
| chr5 | 176520157 | 176520622 | FGFR4        | ENSG00000160867 | 213  | 0.97 | 0.97 | 1  | 0.00085 | NA |
| chr5 | 176980789 | 176981789 | FAM193B      | ENSG00000146067 | 59   | 0.2  | 0.2  | 1  | -0.0029 | NA |
| chr5 | 177031165 | 177031584 | B4GALT7      | ENSG00000027847 | 61   | 0.9  | 0.9  | 1  | -0.0004 | NA |
| chr5 | 177482699 | 177482961 | RP11-889L3.1 | ENSG00000218227 | 225  | 1    | 1    | 1  | 0       | NA |
| chr5 | 178156129 | 178156555 | ZNF354A      | ENSG00000169131 | 42   | 0.98 | 1    | 1  | -0.018  | NA |
| chr5 | 178413296 | 178413731 | GRM6         | ENSG00000113262 | -260 | 0.99 | 1    | 1  | -0.011  | NA |
| chr5 | 179159467 | 179160534 | MAML1        | ENSG00000161021 | 149  | 0.21 | 0.22 | 1  | -0.0063 | NA |
| chr5 | 179247784 | 179248711 | SQSTM1       | ENSG00000161011 | 369  | 0.23 | 0.23 | 1  | 0.0021  | NA |
| chr5 | 179563199 | 179563779 | RASGEF1C     | ENSG00000146090 | 89   | 0.98 | 0.98 | 1  | -0.0011 | NA |
| chr5 | 180661182 | 180661555 | TRIM41       | ENSG00000146063 | 662  | 1    | 0.97 | 1  | 0.034   | NA |
| chr5 | 865317    | 865642    | BRD9         | ENSG00000028310 | 1137 | 0.91 | NA   | NA | NA      | NA |
| chr5 | 1879689   | 1879928   | IRX4         | ENSG00000113430 | 1399 | 0.96 | NA   | NA | NA      | NA |
| chr5 | 13810126  | 13810333  | DNAH5        | ENSG00000039139 | 403  | 1    | NA   | NA | NA      | NA |
| chr5 | 21459469  | 21459852  | RP11-823P9.1 | ENSG00000183666 | 71   | 0.38 | NA   | NA | NA      | NA |
| chr5 | 41509783  | 41510166  | PLCXD3       | ENSG00000182836 | 729  | NA   | 0.67 | NA | NA      | NA |
| chr5 | 41510324  | 41510651  | PLCXD3       | ENSG00000182836 | 216  | 0.22 | NA   | NA | NA      | NA |

|      |           |           |                |                 |       |      |      |          |       |    |
|------|-----------|-----------|----------------|-----------------|-------|------|------|----------|-------|----|
| chr5 | 43515133  | 43515349  | C5orf34        | ENSG00000172244 | -61   | 1    | NA   | NA       | NA    | NA |
| chr5 | 64064243  | 64064538  | SREK1IP1       | ENSG00000153006 | 56    | 0.2  | NA   | NA       | NA    | NA |
| chr5 | 68530597  | 68531001  | CDK7           | ENSG00000134058 | 131   | 0.34 | NA   | NA       | NA    | NA |
| chr5 | 69345366  | 69345821  | SMN2           | ENSG00000205571 | 154   | 1    | NA   | NA       | NA    | NA |
| chr5 | 70220784  | 70221239  | SMN1           | ENSG00000172062 | 154   | NA   | 0.12 | NA       | NA    | NA |
| chr5 | 74349800  | 74350239  | RP11-229C3.2   | ENSG00000250889 | -1351 | 0.17 | NA   | NA       | NA    | NA |
| chr5 | 87955638  | 87955864  | CTC-547D20.1   | ENSG00000245526 | -98   | 0.22 | NA   | NA       | NA    | NA |
| chr5 | 89705343  | 89705580  | CETN3          | ENSG00000153140 | 88    | NA   | 0.26 | NA       | NA    | NA |
| chr5 | 102091449 | 102091666 | PAM            | ENSG00000145730 | 510   | 0.28 | NA   | NA       | NA    | NA |
| chr5 | 121648312 | 121648549 | SNCAIP         | ENSG00000064692 | -89   | 0.23 | NA   | NA       | NA    | NA |
| chr5 | 137514660 | 137514941 | BRD8           | ENSG00000112983 | -125  | 0.12 | NA   | NA       | NA    | NA |
| chr5 | 137667502 | 137668037 | CDC25C         | ENSG00000158402 | -253  | 0.17 | NA   | NA       | NA    | NA |
| chr5 | 140180844 | 140181082 | PCDHA3         | ENSG00000255408 | 180   | 0.89 | NA   | NA       | NA    | NA |
| chr5 | 140235737 | 140236033 | PCDHA10        | ENSG00000250120 | 251   | 0.9  | NA   | NA       | NA    | NA |
| chr5 | 140745531 | 140745893 | PCDHGA5        | ENSG00000253485 | 1814  | 1    | NA   | NA       | NA    | NA |
| chr5 | 140772385 | 140772682 | PCDHGA8        | ENSG00000253767 | 152   | 0.83 | NA   | NA       | NA    | NA |
| chr5 | 140857864 | 140858065 | AC008781.1     | ENSG00000242020 | -919  | 0.92 | NA   | NA       | NA    | NA |
| chr5 | 150325904 | 150326194 | ZNF300P1       | ENSG00000197083 | -198  | 0.21 | NA   | NA       | NA    | NA |
| chr5 | 151304226 | 151304824 | GLRA1          | ENSG00000145888 | -132  | 0.32 | NA   | NA       | NA    | NA |
| chr5 | 159848779 | 159849113 | PTTG1          | ENSG00000164611 | 117   | 0.5  | NA   | NA       | NA    | NA |
| chr5 | 172386893 | 172387102 | RPL26L1        | ENSG00000037241 | 229   | 0.5  | NA   | NA       | NA    | NA |
| chr5 | 177302423 | 177302879 | RP11-423H2.1   | ENSG00000170089 | 128   | 0.38 | NA   | NA       | NA    | NA |
| chr5 | 179061209 | 179061672 | HNRNPH1        | ENSG00000169045 | 1     | 0.5  | NA   | NA       | NA    | NA |
| chr5 | 179084875 | 179085338 | RP11-1379J22.5 | ENSG00000250999 | -131  | 0.14 | NA   | NA       | NA    | NA |
| chr5 | 180542153 | 180542402 | CTB-14A14.2    | ENSG00000248560 | 1171  | 1    | NA   | NA       | NA    | NA |
| chr6 | 3849271   | 3851048   | FAM50B         | ENSG00000145945 | 539   | 0.71 | 0.54 | 1.10E-09 | 0.17  | NA |
| chr6 | 25139920  | 25140246  | RP3-425P12.4   | ENSG00000219682 | -129  | 0.97 | 0.78 | 1.40E-09 | 0.19  | NA |
| chr6 | 50682334  | 50683214  | TFAP2D         | ENSG00000008197 | 1233  | 0.53 | 0.29 | 5.80E-09 | 0.24  | NA |
| chr6 | 3224916   | 3225634   | AL445309.1     | ENSG00000221674 | -491  | 0.54 | 0.97 | 9.70E-09 | -0.43 | NA |
| chr6 | 12749877  | 12750499  | PHACTR1        | ENSG00000112137 | 521   | 0.32 | 0.13 | 1.60E-08 | 0.19  | NA |

|      |           |           |              |                 |       |      |      |          |       |    |
|------|-----------|-----------|--------------|-----------------|-------|------|------|----------|-------|----|
| chr6 | 10410109  | 10410690  | TFAP2A       | ENSG00000137203 | -72   | 0.51 | 0.21 | 2.20E-08 | 0.3   | NA |
| chr6 | 108495654 | 108495986 | NR2E1        | ENSG00000112333 | -1488 | 0.94 | 0.64 | 2.30E-08 | 0.3   | NA |
| chr6 | 45389420  | 45391646  | RUNX2        | ENSG00000124813 | 619   | 0.29 | 0.18 | 2.50E-08 | 0.11  | NA |
| chr6 | 35754713  | 35754914  | C6orf127     | ENSG00000204140 | -4    | 0.67 | 0.32 | 3.20E-08 | 0.35  | NA |
| chr6 | 18122250  | 18122994  | NHLRC1       | ENSG00000187566 | 229   | 0.46 | 0.23 | 8.00E-08 | 0.23  | NA |
| chr6 | 41604583  | 41606663  | MDFI         | ENSG00000112559 | 1003  | 0.41 | 0.28 | 1.10E-07 | 0.13  | NA |
| chr6 | 70992040  | 70992912  | COL9A1       | ENSG00000112280 | 279   | 0.47 | 0.23 | 1.70E-07 | 0.24  | NA |
| chr6 | 146350522 | 146350780 | GRM1         | ENSG00000152822 | 29    | 0.45 | 0.15 | 1.80E-07 | 0.31  | NA |
| chr6 | 139116946 | 139117469 | ECT2L        | ENSG00000203734 | 144   | 0.9  | 0.53 | 2.60E-07 | 0.37  | NA |
| chr6 | 52441269  | 52441793  | TRAM2        | ENSG00000065308 | 182   | 0.39 | 0.16 | 5.70E-07 | 0.23  | NA |
| chr6 | 99275763  | 99276038  | RP11-67P15.1 | ENSG00000187472 | 955   | 0.88 | 0.51 | 5.80E-07 | 0.37  | NA |
| chr6 | 166579973 | 166583423 | T            | ENSG00000164458 | -335  | 0.29 | 0.19 | 2.00E-06 | 0.092 | NA |
| chr6 | 39016307  | 39016998  | GLP1R        | ENSG00000112164 | 78    | 0.36 | 0.17 | 2.30E-06 | 0.19  | NA |
| chr6 | 87832219  | 87832610  | RCN1P1       | ENSG00000215477 | -8    | 0.68 | 0.41 | 2.40E-06 | 0.27  | NA |
| chr6 | 123317164 | 123317753 | CLVS2        | ENSG00000146352 | 342   | 0.12 | 0.33 | 2.40E-06 | -0.21 | NA |
| chr6 | 151560766 | 151560993 | AKAP12       | ENSG00000131016 | -255  | 0.78 | 0.28 | 3.00E-06 | 0.5   | NA |
| chr6 | 90142751  | 90143635  | ANKRD6       | ENSG00000135299 | 304   | 0.42 | 0.16 | 3.30E-06 | 0.26  | NA |
| chr6 | 157801062 | 157803377 | ZDHHC14      | ENSG00000175048 | 54    | 0.24 | 0.16 | 3.40E-06 | 0.087 | NA |
| chr6 | 10887184  | 10887622  | SYCP2L       | ENSG00000153157 | 339   | 0.57 | 0.2  | 3.60E-06 | 0.37  | NA |
| chr6 | 29855295  | 29856565  | HLA-H        | ENSG00000206341 | 580   | 0.88 | 0.18 | 4.30E-06 | 0.7   | NA |
| chr6 | 106959764 | 106960985 | AIM1         | ENSG00000112297 | 644   | 0.29 | 0.17 | 4.30E-06 | 0.12  | NA |
| chr6 | 56911202  | 56911988  | KIAA1586     | ENSG00000168116 | 248   | 0.29 | 0.06 | 7.60E-06 | 0.23  | NA |
| chr6 | 119215454 | 119216457 | MCM9         | ENSG00000111877 | -435  | 0.3  | 0.16 | 8.10E-06 | 0.14  | NA |
| chr6 | 108497595 | 108497996 | NR2E1        | ENSG00000112333 | 487   | 0.88 | 0.51 | 9.00E-06 | 0.38  | NA |
| chr6 | 151711094 | 151712829 | ZBTB2        | ENSG00000181472 | 722   | 0.26 | 0.16 | 3.70E-05 | 0.1   | NA |
| chr6 | 43477221  | 43478553  | POLR1C       | ENSG00000171453 | 447   | 0.28 | 0.17 | 4.20E-05 | 0.11  | NA |
| chr6 | 134210639 | 134211218 | TCF21        | ENSG00000118526 | 455   | 0.58 | 0.28 | 4.30E-05 | 0.3   | NA |
| chr6 | 166720239 | 166722275 | PRR18        | ENSG00000176381 | 614   | 0.26 | 0.17 | 5.20E-05 | 0.085 | NA |
| chr6 | 43026939  | 43027841  | MRPL2        | ENSG00000112651 | -284  | 0.19 | 0.39 | 5.70E-05 | -0.2  | NA |
| chr6 | 168841818 | 168843100 | SMOC2        | ENSG00000112562 | 628   | 0.3  | 0.19 | 6.60E-05 | 0.12  | NA |

|      |           |           |              |                 |       |      |      |          |       |    |
|------|-----------|-----------|--------------|-----------------|-------|------|------|----------|-------|----|
| chr6 | 74233268  | 74233546  | RP11-505P4.7 | ENSG00000229862 | 66    | 0.71 | 0.34 | 7.00E-05 | 0.37  | NA |
| chr6 | 37400847  | 37401367  | FTSJD2       | ENSG00000137200 | 112   | 0.13 | 0.32 | 9.20E-05 | -0.19 | NA |
| chr6 | 150326011 | 150326802 | RAET1K       | ENSG00000218358 | -126  | 0.16 | 0.41 | 0.00012  | -0.25 | NA |
| chr6 | 167411597 | 167413422 | RP1-167A14.2 | ENSG00000227598 | 44    | 0.25 | 0.16 | 0.00014  | 0.088 | NA |
| chr6 | 167039962 | 167041679 | RPS6KA2      | ENSG00000071242 | -95   | 0.24 | 0.15 | 0.00018  | 0.092 | NA |
| chr6 | 150243902 | 150244210 | RAET1G       | ENSG00000203722 | 90    | 0.49 | 0.18 | 0.00019  | 0.3   | NA |
| chr6 | 105627406 | 105627830 | POPDC3       | ENSG00000132429 | 117   | 0.13 | 0.27 | 0.00022  | -0.14 | NA |
| chr6 | 88875397  | 88877449  | CNR1         | ENSG00000118432 | -789  | 0.25 | 0.15 | 0.00024  | 0.098 | NA |
| chr6 | 43196811  | 43197340  | C6orf108     | ENSG00000112667 | 116   | 0.34 | 0.15 | 0.00039  | 0.2   | NA |
| chr6 | 89855645  | 89856538  | PM20D2       | ENSG00000146281 | 322   | 0.26 | 0.15 | 4.00E-04 | 0.11  | NA |
| chr6 | 25732692  | 25732957  | HIST1H2APS1  | ENSG00000216436 | 131   | 0.89 | 0.3  | 0.00041  | 0.59  | NA |
| chr6 | 52149149  | 52149725  | MCM3         | ENSG00000112118 | 68    | 0.25 | 0.47 | 0.00044  | -0.22 | NA |
| chr6 | 99279317  | 99283842  | POU3F2       | ENSG00000184486 | -1001 | 0.29 | 0.21 | 0.00044  | 0.08  | NA |
| chr6 | 37617863  | 37618147  | MDGA1        | ENSG00000112139 | -1599 | 0.9  | 0.52 | 0.00052  | 0.39  | NA |
| chr6 | 33601102  | 33601733  | AL139044.1   | ENSG00000246981 | -4    | 0.63 | 0.32 | 0.00058  | 0.31  | NA |
| chr6 | 41513652  | 41516189  | RP11-328M4.2 | ENSG00000234753 | -1108 | 0.32 | 0.24 | 0.00067  | 0.081 | NA |
| chr6 | 160113557 | 160114863 | SOD2         | ENSG00000112096 | -528  | 0.17 | 0.29 | 0.00069  | -0.12 | NA |
| chr6 | 14117616  | 14118206  | CD83         | ENSG00000112149 | 39    | 0.37 | 0.12 | 0.00079  | 0.24  | NA |
| chr6 | 150184344 | 150185505 | LRP11        | ENSG00000120256 | 238   | 0.13 | 0.24 | 0.00084  | -0.11 | NA |
| chr6 | 46655262  | 46656738  | TDRD6        | ENSG00000180113 | 388   | 0.98 | 0.94 | 0.00086  | 0.036 | NA |
| chr6 | 692464    | 693348    | EXOC2        | ENSG00000112685 | 205   | 0.35 | 0.15 | 0.00093  | 0.19  | NA |
| chr6 | 13813943  | 13814946  | CCDC90A      | ENSG00000050393 | 345   | 0.3  | 0.17 | 0.00094  | 0.13  | NA |
| chr6 | 105307119 | 105307916 | HACE1        | ENSG00000085382 | -82   | 0.23 | 0.12 | 0.001    | 0.11  | NA |
| chr6 | 2971086   | 2971962   | SERPINB6     | ENSG00000124570 | -84   | 0.32 | 0.18 | 0.0012   | 0.13  | NA |
| chr6 | 161412377 | 161413564 | MAP3K4       | ENSG00000085511 | 211   | 0.21 | 0.35 | 0.0013   | -0.15 | NA |
| chr6 | 37616722  | 37617179  | MDGA1        | ENSG00000112139 | -544  | 0.96 | 0.88 | 0.0014   | 0.08  | NA |
| chr6 | 105850481 | 105851257 | PREP         | ENSG00000085377 | 90    | 0.16 | 0.27 | 0.0015   | -0.12 | NA |
| chr6 | 44094708  | 44096134  | MRPL14       | ENSG00000180992 | -227  | 0.24 | 0.15 | 0.0016   | 0.083 | NA |
| chr6 | 2875601   | 2875811   | RP11-420G6.4 | ENSG00000230438 | 1038  | 0.14 | 0.42 | 0.0017   | -0.28 | NA |
| chr6 | 52528939  | 52529651  | RP1-152L7.5  | ENSG00000216775 | -777  | 0.4  | 0.18 | 0.0017   | 0.23  | NA |

|      |           |           |              |                 |      |      |      |        |        |    |
|------|-----------|-----------|--------------|-----------------|------|------|------|--------|--------|----|
| chr6 | 134495939 | 134496958 | SGK1         | ENSG00000118515 | -468 | 0.13 | 0.23 | 0.0017 | -0.098 | NA |
| chr6 | 26104184  | 26104502  | HIST1H4C     | ENSG00000197061 | 239  | 0.38 | 0.12 | 0.0018 | 0.26   | NA |
| chr6 | 36807678  | 36808808  | CPNE5        | ENSG00000124772 | -465 | 0.39 | 0.24 | 0.0019 | 0.14   | NA |
| chr6 | 87861526  | 87862513  | ZNF292       | ENSG00000188994 | -532 | 0.25 | 0.13 | 0.0019 | 0.12   | NA |
| chr6 | 1624185   | 1625468   | GMDS         | ENSG00000112699 | 149  | 0.85 | 0.77 | 0.002  | 0.083  | NA |
| chr6 | 35888479  | 35889060  | SRPK1        | ENSG00000096063 | 55   | 0.28 | 0.15 | 0.0021 | 0.12   | NA |
| chr6 | 6006689   | 6007043   | NRN1         | ENSG00000124785 | 334  | 0.42 | 0.15 | 0.0024 | 0.28   | NA |
| chr6 | 125622704 | 125623117 | HDDC2        | ENSG00000111906 | 210  | 0.25 | 0.13 | 0.0027 | 0.12   | NA |
| chr6 | 146136325 | 146136564 | RP11-545I5.3 | ENSG00000235652 | 67   | 0.2  | 0.46 | 0.0029 | -0.25  | NA |
| chr6 | 26538496  | 26539015  | HMGNA4       | ENSG00000182952 | 183  | 0.33 | 0.18 | 0.003  | 0.15   | NA |
| chr6 | 118971662 | 118973137 | C6orf204     | ENSG00000111860 | 621  | 0.24 | 0.15 | 0.003  | 0.092  | NA |
| chr6 | 39901852  | 39902299  | MOCS1        | ENSG00000124615 | 85   | 0.37 | 0.21 | 0.0033 | 0.16   | NA |
| chr6 | 108278909 | 108279704 | SEC63        | ENSG00000025796 | -171 | 0.37 | 0.22 | 0.0033 | 0.14   | NA |
| chr6 | 27100174  | 27101124  | HIST1H2BJ    | ENSG00000124635 | -120 | 0.19 | 0.38 | 0.0034 | -0.19  | NA |
| chr6 | 86303113  | 86304061  | SNX14        | ENSG00000135317 | -84  | 0.25 | 0.14 | 0.0039 | 0.11   | NA |
| chr6 | 34725063  | 34725306  | SNRPC        | ENSG00000124562 | 1    | 0.22 | 0.43 | 0.0041 | -0.21  | NA |
| chr6 | 49430934  | 49431136  | CENPQ        | ENSG00000031691 | -61  | 0.26 | 0.73 | 0.0041 | -0.47  | NA |
| chr6 | 13710979  | 13712556  | RANBP9       | ENSG00000010017 | 29   | 0.18 | 0.26 | 0.0042 | -0.08  | NA |
| chr6 | 82461133  | 82463805  | FAM46A       | ENSG00000112773 | -999 | 0.26 | 0.16 | 0.0042 | 0.11   | NA |
| chr6 | 109776194 | 109777645 | MICAL1       | ENSG00000135596 | -71  | 0.27 | 0.19 | 0.0042 | 0.078  | NA |
| chr6 | 131383431 | 131384371 | EPB41L2      | ENSG00000079819 | -185 | 0.31 | 0.2  | 0.0042 | 0.11   | NA |
| chr6 | 18264139  | 18265100  | DEK          | ENSG00000124795 | -180 | 0.21 | 0.13 | 0.0045 | 0.083  | NA |
| chr6 | 35181095  | 35182547  | SCUBE3       | ENSG00000146197 | -369 | 0.24 | 0.15 | 0.0046 | 0.088  | NA |
| chr6 | 136610148 | 136611285 | BCLAF1       | ENSG00000029363 | 203  | 0.23 | 0.39 | 0.0046 | -0.17  | NA |
| chr6 | 108878830 | 108883404 | FOXO3        | ENSG00000118689 | 79   | 0.27 | 0.22 | 0.0055 | 0.049  | NA |
| chr6 | 71665360  | 71667132  | B3GAT2       | ENSG00000112309 | 495  | 0.22 | 0.16 | 0.0056 | 0.06   | NA |
| chr6 | 99797208  | 99797946  | C6orf168     | ENSG00000146267 | -46  | 0.16 | 0.29 | 0.006  | -0.13  | NA |
| chr6 | 127836730 | 127837706 | RP3-403A15.5 | ENSG00000255330 | 541  | 0.19 | 0.12 | 0.0063 | 0.073  | NA |
| chr6 | 143999154 | 143999667 | PHACTR2      | ENSG00000112419 | 254  | 0.22 | 0.12 | 0.0067 | 0.11   | NA |
| chr6 | 110500025 | 110500966 | WASF1        | ENSG00000112290 | 357  | 0.12 | 0.23 | 0.0073 | -0.11  | NA |

|      |           |           |               |                 |       |      |      |        |        |    |
|------|-----------|-----------|---------------|-----------------|-------|------|------|--------|--------|----|
| chr6 | 41747590  | 41747874  | FRS3          | ENSG00000137218 | -94   | 0.2  | 0.11 | 0.0076 | 0.094  | NA |
| chr6 | 138724617 | 138726215 | HEBP2         | ENSG00000051620 | 748   | 0.29 | 0.19 | 0.0078 | 0.1    | NA |
| chr6 | 7590399   | 7590926   | SNRNP48       | ENSG00000168566 | 230   | 0.16 | 0.28 | 0.008  | -0.12  | NA |
| chr6 | 44191278  | 44191872  | SLC29A1       | ENSG00000112759 | 273   | 0.13 | 0.24 | 0.0082 | -0.11  | NA |
| chr6 | 89790137  | 89791781  | PNRC1         | ENSG00000146278 | 489   | 0.32 | 0.19 | 0.0085 | 0.14   | NA |
| chr6 | 116691827 | 116692868 | DSE           | ENSG00000111817 | 237   | 0.26 | 0.19 | 0.0088 | 0.076  | NA |
| chr6 | 137112676 | 137114366 | MAP3K5        | ENSG00000197442 | 135   | 0.22 | 0.16 | 0.0088 | 0.057  | NA |
| chr6 | 27114222  | 27115181  | HIST1H2BK     | ENSG00000197903 | -124  | 0.47 | 0.13 | 0.0089 | 0.34   | NA |
| chr6 | 7726095   | 7728161   | BMP6          | ENSG00000153162 | 796   | 0.24 | 0.18 | 0.009  | 0.061  | NA |
| chr6 | 99395302  | 99395855  | FBXL4         | ENSG00000112234 | 224   | 0.26 | 0.13 | 0.0092 | 0.13   | NA |
| chr6 | 137365299 | 137366126 | IL20RA        | ENSG00000016402 | -327  | 0.28 | 0.18 | 0.0099 | 0.1    | NA |
| chr6 | 6008857   | 6009299   | NRN1          | ENSG00000124785 | -1878 | 0.25 | 0.48 | 0.01   | -0.23  | NA |
| chr6 | 71377385  | 71378178  | SMAP1         | ENSG00000112305 | 302   | 0.26 | 0.18 | 0.011  | 0.083  | NA |
| chr6 | 97345266  | 97345973  | NDUFAF4       | ENSG00000123545 | 131   | 0.24 | 0.38 | 0.012  | -0.14  | NA |
| chr6 | 109804094 | 109804522 | ZBTB24        | ENSG00000112365 | 132   | 0.22 | 0.41 | 0.012  | -0.19  | NA |
| chr6 | 123110288 | 123110878 | SMPDL3A       | ENSG00000172594 | 268   | 0.15 | 0.23 | 0.012  | -0.087 | NA |
| chr6 | 37467395  | 37467800  | C6orf129      | ENSG00000198937 | 101   | 0.26 | 0.12 | 0.013  | 0.14   | NA |
| chr6 | 42897116  | 42897611  | CNPY3         | ENSG00000137161 | 381   | 0.21 | 0.34 | 0.013  | -0.14  | NA |
| chr6 | 74063519  | 74064471  | DPPA5         | ENSG00000203909 | 23    | 0.96 | 0.91 | 0.013  | 0.046  | NA |
| chr6 | 26598108  | 26598316  | ABT1          | ENSG00000146109 | 1032  | 0.71 | 0.33 | 0.015  | 0.37   | NA |
| chr6 | 170598214 | 170601222 | DLL1          | ENSG00000198719 | -157  | 0.21 | 0.26 | 0.015  | -0.048 | NA |
| chr6 | 136870826 | 136872145 | MAP7          | ENSG00000135525 | 161   | 0.19 | 0.27 | 0.018  | -0.078 | NA |
| chr6 | 160389832 | 160390890 | IGF2R         | ENSG00000197081 | 230   | 0.22 | 0.17 | 0.018  | 0.052  | NA |
| chr6 | 41039981  | 41041679  | C6orf130      | ENSG00000124596 | -771  | 0.23 | 0.15 | 0.02   | 0.088  | NA |
| chr6 | 83073416  | 83075319  | TPBG          | ENSG00000146242 | 406   | 0.19 | 0.14 | 0.02   | 0.049  | NA |
| chr6 | 74104425  | 74104878  | DDX43         | ENSG00000080007 | 180   | 1    | 0.79 | 0.022  | 0.21   | NA |
| chr6 | 10419399  | 10420323  | TFAP2A        | ENSG00000137203 | -74   | 0.29 | 0.42 | 0.023  | -0.13  | NA |
| chr6 | 75994003  | 75994834  | TMEM30A       | ENSG00000112697 | -391  | 0.22 | 0.12 | 0.023  | 0.1    | NA |
| chr6 | 100912071 | 100913337 | SIM1          | ENSG00000112246 | 61    | 0.18 | 0.13 | 0.023  | 0.055  | NA |
| chr6 | 109611449 | 109612230 | RP11-425D10.2 | ENSG00000219700 | -133  | 0.7  | 0.79 | 0.024  | -0.083 | NA |

|      |           |           |             |                 |      |      |      |       |        |    |
|------|-----------|-----------|-------------|-----------------|------|------|------|-------|--------|----|
| chr6 | 142409473 | 142410112 | NMBR        | ENSG00000135577 | 144  | 0.41 | 0.3  | 0.024 | 0.11   | NA |
| chr6 | 35479388  | 35479678  | TULP1       | ENSG00000112041 | 211  | 0.66 | 0.49 | 0.025 | 0.17   | NA |
| chr6 | 45345185  | 45346261  | SUPT3H      | ENSG00000196284 | -53  | 0.27 | 0.17 | 0.025 | 0.1    | NA |
| chr6 | 74161086  | 74162090  | MB21D1      | ENSG00000164430 | 394  | 0.19 | 0.27 | 0.025 | -0.078 | NA |
| chr6 | 27228100  | 27228364  | AL021808.3  | ENSG00000244396 | -478 | 0.35 | 0.24 | 0.026 | 0.11   | NA |
| chr6 | 27775329  | 27776258  | HIST1H2BL   | ENSG00000185130 | -84  | 0.32 | 0.14 | 0.026 | 0.19   | NA |
| chr6 | 90597207  | 90597653  | RP11-63K6.5 | ENSG00000219240 | 1555 | 0.23 | 0.33 | 0.026 | -0.11  | NA |
| chr6 | 97372181  | 97372661  | KLHL32      | ENSG00000186231 | -75  | 0.23 | 0.09 | 0.026 | 0.14   | NA |
| chr6 | 144605926 | 144608280 | UTRN        | ENSG00000152818 | 266  | 0.23 | 0.18 | 0.026 | 0.053  | NA |
| chr6 | 43603495  | 43603818  | MAD2L1BP    | ENSG00000124688 | 100  | 0.21 | 0.4  | 0.027 | -0.18  | NA |
| chr6 | 80714149  | 80714568  | TTK         | ENSG00000112742 | 36   | 0.26 | 0.48 | 0.027 | -0.22  | NA |
| chr6 | 143832389 | 143832943 | FUCA2       | ENSG00000001036 | 133  | 0.14 | 0.31 | 0.027 | -0.17  | NA |
| chr6 | 116783067 | 116783678 | FAM26F      | ENSG00000188820 | -258 | 0.28 | 0.18 | 0.029 | 0.096  | NA |
| chr6 | 91296358  | 91297081  | MAP3K7      | ENSG00000135341 | -117 | 0.28 | 0.18 | 0.03  | 0.094  | NA |
| chr6 | 111303114 | 111303485 | RPF2        | ENSG00000197498 | 81   | 0.18 | 0.25 | 0.03  | -0.074 | NA |
| chr6 | 119669589 | 119671424 | MAN1A1      | ENSG00000111885 | 395  | 0.31 | 0.24 | 0.03  | 0.068  | NA |
| chr6 | 139308498 | 139309559 | REPS1       | ENSG00000135597 | -251 | 0.25 | 0.19 | 0.03  | 0.065  | NA |
| chr6 | 43044044  | 43045057  | PTK7        | ENSG00000112655 | 505  | 0.23 | 0.17 | 0.031 | 0.064  | NA |
| chr6 | 39196817  | 39197517  | KCNK5       | ENSG00000164626 | 59   | 0.29 | 0.19 | 0.032 | 0.098  | NA |
| chr6 | 42109904  | 42110361  | C6orf132    | ENSG00000188112 | 50   | 0.19 | 0.11 | 0.033 | 0.075  | NA |
| chr6 | 74171349  | 74171869  | MTO1        | ENSG00000135297 | 155  | 0.28 | 0.45 | 0.033 | -0.17  | NA |
| chr6 | 42928218  | 42928810  | GNMT        | ENSG00000124713 | 18   | 0.24 | 0.16 | 0.034 | 0.077  | NA |
| chr6 | 27777855  | 27778251  | HIST1H3H    | ENSG00000203813 | 211  | 0.15 | 0.36 | 0.035 | -0.21  | NA |
| chr6 | 41606994  | 41607238  | MDFI        | ENSG00000112559 | 851  | 0.19 | 0.71 | 0.035 | -0.52  | NA |
| chr6 | 66804630  | 66804831  | RP1-129L7.1 | ENSG00000218890 | 72   | 0.9  | 0.97 | 0.035 | -0.071 | NA |
| chr6 | 146055896 | 146056981 | EPM2A       | ENSG00000112425 | -45  | 0.28 | 0.21 | 0.035 | 0.07   | NA |
| chr6 | 144471069 | 144472017 | STX11       | ENSG00000135604 | -120 | 0.23 | 0.17 | 0.036 | 0.061  | NA |
| chr6 | 111135515 | 111136913 | CDK19       | ENSG00000155111 | 85   | 0.27 | 0.21 | 0.038 | 0.062  | NA |
| chr6 | 15662444  | 15663412  | DTNBP1      | ENSG00000047579 | 223  | 0.23 | 0.15 | 0.039 | 0.08   | NA |
| chr6 | 34122475  | 34122949  | GRM4        | ENSG00000124493 | 687  | 0.23 | 0.15 | 0.039 | 0.082  | NA |

|      |           |           |              |                 |       |      |      |       |        |    |
|------|-----------|-----------|--------------|-----------------|-------|------|------|-------|--------|----|
| chr6 | 128901553 | 128901925 | EEF1DP5      | ENSG00000213130 | 290   | 0.85 | 0.98 | 0.039 | -0.13  | NA |
| chr6 | 157744004 | 157745217 | C6orf35      | ENSG00000215712 | 23    | 0.22 | 0.32 | 0.04  | -0.11  | NA |
| chr6 | 13486324  | 13488792  | C6orf114     | ENSG00000187461 | -1143 | 0.2  | 0.26 | 0.041 | -0.053 | NA |
| chr6 | 106773187 | 106773803 | ATG5         | ENSG00000057663 | -203  | 0.23 | 0.15 | 0.042 | 0.078  | NA |
| chr6 | 127796286 | 127797356 | RP3-403A15.5 | ENSG00000255330 | -270  | 0.99 | 0.96 | 0.042 | 0.032  | NA |
| chr6 | 133135364 | 133135829 | RPS12        | ENSG00000112306 | 16    | 0.28 | 0.13 | 0.042 | 0.14   | NA |
| chr6 | 122931153 | 122931705 | PKIB         | ENSG00000135549 | 52    | 0.38 | 0.15 | 0.043 | 0.23   | NA |
| chr6 | 166795368 | 166797301 | BRP44L       | ENSG00000060762 | 25    | 0.19 | 0.14 | 0.043 | 0.051  | NA |
| chr6 | 37616393  | 37616621  | MDGA1        | ENSG00000112139 | -101  | 0.87 | 0.25 | 0.044 | 0.62   | NA |
| chr6 | 52535714  | 52535988  | TMEM14A      | ENSG00000096092 | -56   | 0.52 | 0.27 | 0.044 | 0.25   | NA |
| chr6 | 132128727 | 132129563 | ENPP1        | ENSG00000197594 | -11   | 0.14 | 0.21 | 0.044 | -0.077 | NA |
| chr6 | 160768414 | 160770308 | SLC22A3      | ENSG00000146477 | 61    | 0.42 | 0.34 | 0.044 | 0.071  | NA |
| chr6 | 26250436  | 26250827  | HIST1H3F     | ENSG00000256316 | 204   | 0.33 | 0.18 | 0.045 | 0.15   | NA |
| chr6 | 73867584  | 73867934  | RP11-257K9.3 | ENSG00000234025 | 103   | 0.69 | 0.85 | 0.045 | -0.16  | NA |
| chr6 | 131949087 | 131949552 | MED23        | ENSG00000112282 | -119  | 0.25 | 0.15 | 0.047 | 0.093  | NA |
| chr6 | 24494664  | 24495670  | ALDH5A1      | ENSG00000112294 | 87    | 0.28 | 0.21 | 0.048 | 0.074  | NA |
| chr6 | 109761395 | 109762604 | PPIL6        | ENSG00000185250 | -292  | 0.19 | 0.14 | 0.048 | 0.051  | NA |
| chr6 | 34664072  | 34664407  | C6orf106     | ENSG00000196821 | 385   | 0.27 | 0.15 | 0.049 | 0.12   | NA |
| chr6 | 143265719 | 143268791 | HIVEP2       | ENSG00000010818 | -917  | 0.26 | 0.22 | 0.049 | 0.045  | NA |
| chr6 | 149887317 | 149888252 | C6orf72      | ENSG00000055211 | 374   | 0.27 | 0.18 | 0.049 | 0.09   | NA |
| chr6 | 168476320 | 168476861 | FRMD1        | ENSG00000153303 | -44   | 0.79 | 0.91 | 0.049 | -0.13  | NA |
| chr6 | 139094449 | 139095009 | CCDC28A      | ENSG00000024862 | 72    | 0.25 | 0.12 | 0.051 | 0.12   | NA |
| chr6 | 17102309  | 17102539  | RP3-486B10.1 | ENSG00000230873 | -65   | 0.29 | 0.16 | 0.055 | 0.12   | NA |
| chr6 | 100055641 | 100055866 | PRDM13       | ENSG00000112238 | 1103  | 0.59 | 0.36 | 0.055 | 0.23   | NA |
| chr6 | 6007387   | 6007797   | NRN1         | ENSG00000124785 | -392  | 0.29 | 0.45 | 0.057 | -0.16  | NA |
| chr6 | 7312811   | 7313656   | SSR1         | ENSG00000124783 | 174   | 0.21 | 0.29 | 0.058 | -0.084 | NA |
| chr6 | 99872726  | 99873206  | RP11-98I9.4  | ENSG00000228506 | 168   | 0.21 | 0.12 | 0.058 | 0.097  | NA |
| chr6 | 114663328 | 114664859 | HS3ST5       | ENSG00000249853 | 116   | 0.23 | 0.18 | 0.058 | 0.043  | NA |
| chr6 | 168435835 | 168436086 | KIF25        | ENSG00000125337 | 1282  | 0.31 | 1    | 0.058 | -0.69  | NA |
| chr6 | 117198089 | 117198705 | RFX6         | ENSG00000185002 | 22    | 0.34 | 0.25 | 0.059 | 0.098  | NA |



|      |           |           |              |                 |      |      |      |       |        |    |
|------|-----------|-----------|--------------|-----------------|------|------|------|-------|--------|----|
| chr6 | 161352084 | 161352386 | RP3-428L16.1 | ENSG00000231863 | 123  | 0.25 | 0.62 | 0.059 | -0.37  | NA |
| chr6 | 44280719  | 44281198  | AARS2        | ENSG00000124608 | 105  | 0.24 | 0.1  | 0.061 | 0.14   | NA |
| chr6 | 54711153  | 54712033  | FAM83B       | ENSG00000168143 | 24   | 0.36 | 0.26 | 0.061 | 0.1    | NA |
| chr6 | 71276541  | 71277035  | C6orf57      | ENSG00000154079 | 168  | 0.24 | 0.15 | 0.061 | 0.094  | NA |
| chr6 | 7389634   | 7390317   | CAGE1        | ENSG00000164304 | -340 | 0.23 | 0.17 | 0.062 | 0.061  | NA |
| chr6 | 88411325  | 88412168  | AKIRIN2      | ENSG00000135334 | 181  | 0.23 | 0.18 | 0.062 | 0.047  | NA |
| chr6 | 19837504  | 19839314  | ID4          | ENSG00000172201 | 792  | 0.2  | 0.17 | 0.064 | 0.037  | NA |
| chr6 | 147728082 | 147728320 | YAP1P1       | ENSG00000220494 | 177  | 0.99 | 0.95 | 0.064 | 0.04   | NA |
| chr6 | 43737632  | 43739852  | VEGFA        | ENSG00000112715 | 821  | 0.21 | 0.17 | 0.066 | 0.037  | NA |
| chr6 | 3259047   | 3259738   | PSMG4        | ENSG00000180822 | 264  | 0.15 | 0.24 | 0.067 | -0.089 | NA |
| chr6 | 11093587  | 11094667  | RP4-761I2.2  | ENSG00000224531 | 88   | 0.22 | 0.14 | 0.068 | 0.079  | NA |
| chr6 | 16128992  | 16130023  | MYLIP        | ENSG00000007944 | 151  | 0.21 | 0.26 | 0.068 | -0.051 | NA |
| chr6 | 110797297 | 110798201 | SLC22A16     | ENSG00000004809 | -150 | 0.26 | 0.19 | 0.069 | 0.066  | NA |
| chr6 | 151646668 | 151646958 | AKAP12       | ENSG00000131016 | -10  | 0.14 | 0.27 | 0.07  | -0.13  | NA |
| chr6 | 153450992 | 153452792 | RGS17        | ENSG00000091844 | 492  | 0.25 | 0.2  | 0.071 | 0.053  | NA |
| chr6 | 43336480  | 43337832  | ZNF318       | ENSG00000171467 | 25   | 0.22 | 0.17 | 0.075 | 0.049  | NA |
| chr6 | 146864481 | 146865426 | RAB32        | ENSG00000118508 | 124  | 0.26 | 0.2  | 0.076 | 0.061  | NA |
| chr6 | 56407464  | 56407926  | DST          | ENSG00000151914 | -89  | 0.23 | 0.17 | 0.077 | 0.068  | NA |
| chr6 | 26596046  | 26596321  | ABT1         | ENSG00000146109 | -997 | 0.26 | 0.12 | 0.078 | 0.13   | NA |
| chr6 | 150463771 | 150465002 | PPP1R14C     | ENSG00000198729 | 174  | 0.17 | 0.23 | 0.078 | -0.06  | NA |
| chr6 | 34202567  | 34206193  | HMGA1        | ENSG00000137309 | -197 | 0.5  | 0.46 | 0.079 | 0.037  | NA |
| chr6 | 105388190 | 105389545 | C6orf220     | ENSG00000203809 | -465 | 0.21 | 0.17 | 0.079 | 0.04   | NA |
| chr6 | 42016243  | 42016731  | CCND3        | ENSG00000112576 | -73  | 0.22 | 0.14 | 0.084 | 0.082  | NA |
| chr6 | 18155534  | 18156354  | KDM1B        | ENSG00000165097 | 384  | 0.19 | 0.25 | 0.085 | -0.061 | NA |
| chr6 | 64345490  | 64346465  | PHF3         | ENSG00000118482 | 252  | 0.35 | 0.25 | 0.085 | 0.1    | NA |
| chr6 | 44187186  | 44187400  | SLC29A1      | ENSG00000112759 | 51   | 0.37 | 0.58 | 0.086 | -0.22  | NA |
| chr6 | 11043913  | 11045206  | RP1-62D2.3   | ENSG00000230314 | 566  | 0.25 | 0.2  | 0.088 | 0.054  | NA |
| chr6 | 26056167  | 26056798  | HIST1H1C     | ENSG00000187837 | 217  | 0.15 | 0.25 | 0.088 | -0.093 | NA |
| chr6 | 136571120 | 136571814 | FAM54A       | ENSG00000146410 | -37  | 0.32 | 0.19 | 0.091 | 0.13   | NA |
| chr6 | 126661135 | 126661387 | CENPW        | ENSG00000203760 | -59  | 0.34 | 0.23 | 0.093 | 0.1    | NA |

|      |           |           |           |                 |       |      |      |       |        |    |
|------|-----------|-----------|-----------|-----------------|-------|------|------|-------|--------|----|
| chr6 | 88757292  | 88757879  | SPACA1    | ENSG00000118434 | 78    | 0.6  | 0.67 | 0.096 | -0.07  | NA |
| chr6 | 97284830  | 97285782  | GPR63     | ENSG00000112218 | 47    | 0.17 | 0.24 | 0.096 | -0.07  | NA |
| chr6 | 90120874  | 90122370  | RRAGD     | ENSG00000025039 | -398  | 0.18 | 0.23 | 0.097 | -0.044 | NA |
| chr6 | 88032157  | 88032429  | C6orf162  | ENSG00000111850 | -13   | 0.16 | 0.29 | 0.098 | -0.12  | NA |
| chr6 | 130686414 | 130687736 | SAMD3     | ENSG00000164483 | -505  | 0.22 | 0.18 | 0.099 | 0.043  | NA |
| chr6 | 42018139  | 42018604  | TAF8      | ENSG00000137413 | 120   | 0.19 | 0.27 | 0.1   | -0.078 | NA |
| chr6 | 101846766 | 101847135 | GRIK2     | ENSG00000164418 | -204  | 0.69 | 0.47 | 0.1   | 0.22   | NA |
| chr6 | 21594613  | 21596437  | SOX4      | ENSG00000124766 | 1454  | 0.24 | 0.19 | 0.11  | 0.044  | NA |
| chr6 | 53409120  | 53410099  | GCLC      | ENSG00000001084 | -203  | 0.22 | 0.16 | 0.11  | 0.06   | NA |
| chr6 | 79577158  | 79577756  | IRAK1BP1  | ENSG00000146243 | 268   | 0.2  | 0.14 | 0.11  | 0.057  | NA |
| chr6 | 110012365 | 110012769 | AKD1      | ENSG00000155085 | -152  | 0.21 | 0.32 | 0.11  | -0.11  | NA |
| chr6 | 126277792 | 126278501 | HINT3     | ENSG00000111911 | 219   | 0.24 | 0.19 | 0.11  | 0.056  | NA |
| chr6 | 139456037 | 139457121 | HECA      | ENSG00000112406 | 330   | 0.2  | 0.16 | 0.11  | 0.041  | NA |
| chr6 | 154830560 | 154832001 | CNKSR3    | ENSG00000153721 | 473   | 0.22 | 0.27 | 0.11  | -0.049 | NA |
| chr6 | 26273290  | 26273557  | HIST1H2BI | ENSG00000168242 | 279   | 0.36 | 0.23 | 0.12  | 0.13   | NA |
| chr6 | 35419879  | 35420766  | FANCE     | ENSG00000112039 | 184   | 0.18 | 0.27 | 0.12  | -0.087 | NA |
| chr6 | 38682949  | 38683265  | DNAH8     | ENSG00000124721 | -1228 | 0.34 | 0.17 | 0.12  | 0.17   | NA |
| chr6 | 43214369  | 43214591  | TTBK1     | ENSG00000146216 | -1247 | 0.23 | 0.13 | 0.12  | 0.1    | NA |
| chr6 | 76311330  | 76312563  | SENP6     | ENSG00000112701 | 324   | 0.13 | 0.18 | 0.12  | -0.048 | NA |
| chr6 | 10882926  | 10883149  | GCM2      | ENSG00000124827 | -863  | 0.31 | 0.2  | 0.13  | 0.11   | NA |
| chr6 | 27279794  | 27280635  | POM121L2  | ENSG00000158553 | -265  | 0.26 | 0.33 | 0.13  | -0.068 | NA |
| chr6 | 42750449  | 42751432  | KIAA0240  | ENSG00000112624 | 1127  | 0.21 | 0.29 | 0.13  | -0.084 | NA |
| chr6 | 43655271  | 43655618  | MRPS18A   | ENSG00000096080 | 84    | 0.36 | 0.28 | 0.13  | 0.085  | NA |
| chr6 | 44213695  | 44215707  | HSP90AB1  | ENSG00000096384 | -123  | 0.29 | 0.21 | 0.13  | 0.079  | NA |
| chr6 | 52859565  | 52859767  | GSTA4     | ENSG00000170899 | 302   | 0.14 | 0.28 | 0.13  | -0.14  | NA |
| chr6 | 105584148 | 105585621 | BVES      | ENSG00000112276 | -661  | 0.22 | 0.27 | 0.13  | -0.053 | NA |
| chr6 | 109415560 | 109416747 | SESN1     | ENSG00000080546 | -131  | 0.26 | 0.19 | 0.13  | 0.069  | NA |
| chr6 | 112193835 | 112194854 | FYN       | ENSG00000010810 | -104  | 0.23 | 0.19 | 0.13  | 0.046  | NA |
| chr6 | 118228042 | 118229811 | SLC35F1   | ENSG00000196376 | 237   | 0.21 | 0.17 | 0.13  | 0.039  | NA |
| chr6 | 3456061   | 3457963   | SLC22A23  | ENSG00000137266 | -735  | 0.23 | 0.2  | 0.14  | 0.037  | NA |

|      |           |           |               |                 |      |      |      |      |        |    |
|------|-----------|-----------|---------------|-----------------|------|------|------|------|--------|----|
| chr6 | 13614901  | 13615903  | NOL7          | ENSG00000225921 | -157 | 0.22 | 0.27 | 0.14 | -0.045 | NA |
| chr6 | 47445108  | 47446091  | CD2AP         | ENSG00000198087 | 74   | 0.18 | 0.13 | 0.14 | 0.05   | NA |
| chr6 | 72596036  | 72596404  | RIMS1         | ENSG00000079841 | -186 | 0.35 | 0.16 | 0.14 | 0.19   | NA |
| chr6 | 155635218 | 155635882 | TFB1M         | ENSG00000029639 | 11   | 0.16 | 0.2  | 0.14 | -0.046 | NA |
| chr6 | 169648546 | 169649047 | THBS2         | ENSG00000186340 | -21  | 0.99 | 0.97 | 0.14 | 0.023  | NA |
| chr6 | 4775131   | 4777550   | RP3-430A16.1  | ENSG00000236336 | -698 | 0.2  | 0.24 | 0.15 | -0.039 | NA |
| chr6 | 10747827  | 10748118  | TMEM14B       | ENSG00000137210 | -1   | 0.17 | 0.29 | 0.15 | -0.12  | NA |
| chr6 | 26156449  | 26157146  | HIST1H1E      | ENSG00000168298 | 238  | 0.14 | 0.22 | 0.15 | -0.073 | NA |
| chr6 | 132271356 | 132271658 | RP11-69I8.3   | ENSG00000227220 | -579 | 0.11 | 0.24 | 0.15 | -0.12  | NA |
| chr6 | 144384894 | 144385888 | PLAGL1        | ENSG00000118495 | 286  | 0.19 | 0.24 | 0.15 | -0.057 | NA |
| chr6 | 150284682 | 150286515 | ULBP1         | ENSG00000111981 | 455  | 0.14 | 0.18 | 0.15 | -0.039 | NA |
| chr6 | 155054186 | 155055403 | SCAF8         | ENSG00000213079 | 335  | 0.25 | 0.2  | 0.15 | 0.051  | NA |
| chr6 | 159290673 | 159291195 | C6orf99       | ENSG00000203711 | -20  | 0.22 | 0.13 | 0.15 | 0.086  | NA |
| chr6 | 25652380  | 25652709  | SCGN          | ENSG00000079689 | 80   | 0.31 | 0.19 | 0.16 | 0.13   | NA |
| chr6 | 35464056  | 35466269  | TEAD3         | ENSG00000007866 | -435 | 0.3  | 0.26 | 0.16 | 0.032  | NA |
| chr6 | 35733589  | 35733825  | RP3-510O8.3   | ENSG00000220734 | 22   | 0.88 | 0.95 | 0.16 | -0.068 | NA |
| chr6 | 37663761  | 37667102  | MDGA1         | ENSG00000112139 | -844 | 0.27 | 0.24 | 0.16 | 0.032  | NA |
| chr6 | 44232880  | 44233447  | NFKBIE        | ENSG00000146232 | 337  | 0.2  | 0.28 | 0.16 | -0.08  | NA |
| chr6 | 159420465 | 159421293 | RSPH3         | ENSG00000130363 | -66  | 0.21 | 0.3  | 0.16 | -0.084 | NA |
| chr6 | 11537537  | 11538929  | TMEM170B      | ENSG00000205269 | 295  | 0.21 | 0.17 | 0.17 | 0.044  | NA |
| chr6 | 26285423  | 26285940  | HIST1H4H      | ENSG00000158406 | 56   | 0.18 | 0.27 | 0.17 | -0.084 | NA |
| chr6 | 35772960  | 35773172  | LHFPL5        | ENSG00000197753 | -4   | 0.23 | 0.13 | 0.17 | 0.097  | NA |
| chr6 | 37786707  | 37788114  | RP3-441A12.1  | ENSG00000225945 | -416 | 0.25 | 0.21 | 0.17 | 0.046  | NA |
| chr6 | 74229962  | 74231497  | EEF1A1        | ENSG00000156508 | 12   | 0.19 | 0.24 | 0.17 | -0.045 | NA |
| chr6 | 84569263  | 84569619  | CYB5R4        | ENSG00000065615 | 79   | 0.22 | 0.17 | 0.17 | 0.051  | NA |
| chr6 | 146920034 | 146920245 | RP11-715G15.1 | ENSG00000237468 | -72  | 0.38 | 0.64 | 0.17 | -0.25  | NA |
| chr6 | 24720387  | 24721920  | C6orf62       | ENSG00000112308 | -533 | 0.33 | 0.24 | 0.18 | 0.092  | NA |
| chr6 | 34111735  | 34113944  | GRM4          | ENSG00000124493 | 1018 | 0.21 | 0.18 | 0.18 | 0.027  | NA |
| chr6 | 42531984  | 42532292  | UBR2          | ENSG00000024048 | 338  | 0.27 | 0.19 | 0.18 | 0.085  | NA |
| chr6 | 42989178  | 42989510  | RRP36         | ENSG00000124541 | -39  | 0.23 | 0.14 | 0.18 | 0.087  | NA |

|      |           |           |              |                 |       |      |      |      |        |    |
|------|-----------|-----------|--------------|-----------------|-------|------|------|------|--------|----|
| chr6 | 144164043 | 144164771 | LTV1         | ENSG00000135521 | -74   | 0.26 | 0.2  | 0.18 | 0.064  | NA |
| chr6 | 170062622 | 170063112 | WDR27        | ENSG00000184465 | 952   | 0.92 | 1    | 0.18 | -0.082 | NA |
| chr6 | 107810066 | 107812733 | SOBP         | ENSG00000112320 | 237   | 0.23 | 0.19 | 0.2  | 0.034  | NA |
| chr6 | 111408426 | 111409484 | SLC16A10     | ENSG00000112394 | 249   | 0.18 | 0.26 | 0.2  | -0.075 | NA |
| chr6 | 8064046   | 8064765   | MUTED        | ENSG00000188428 | 192   | 0.24 | 0.17 | 0.21 | 0.07   | NA |
| chr6 | 44264970  | 44265711  | TCTE1        | ENSG00000146221 | 85    | 0.14 | 0.19 | 0.21 | -0.047 | NA |
| chr6 | 50787286  | 50788091  | TFAP2B       | ENSG00000008196 | 1249  | 0.28 | 0.35 | 0.21 | -0.068 | NA |
| chr6 | 84937116  | 84937728  | KIAA1009     | ENSG00000135315 | -108  | 0.26 | 0.19 | 0.21 | 0.069  | NA |
| chr6 | 107435454 | 107437310 | BEND3        | ENSG00000178409 | -746  | 0.22 | 0.17 | 0.21 | 0.043  | NA |
| chr6 | 109702898 | 109704093 | CD164        | ENSG00000135535 | -592  | 0.2  | 0.27 | 0.21 | -0.073 | NA |
| chr6 | 144328916 | 144329847 | PLAGL1       | ENSG00000118495 | -14   | 0.44 | 0.48 | 0.21 | -0.039 | NA |
| chr6 | 28109365  | 28109939  | ZNF192       | ENSG00000198315 | -64   | 0.31 | 0.22 | 0.22 | 0.085  | NA |
| chr6 | 28186476  | 28186884  | TOB2P1       | ENSG00000176933 | -25   | 0.25 | 0.19 | 0.22 | 0.053  | NA |
| chr6 | 74363202  | 74364006  | SLC17A5      | ENSG00000119899 | 92    | 0.22 | 0.28 | 0.22 | -0.062 | NA |
| chr6 | 131456364 | 131457157 | AKAP7        | ENSG00000118507 | -46   | 0.19 | 0.15 | 0.22 | 0.04   | NA |
| chr6 | 132722093 | 132722901 | MOXD1        | ENSG00000079931 | 117   | 0.25 | 0.18 | 0.22 | 0.065  | NA |
| chr6 | 133119483 | 133119802 | C6orf192     | ENSG00000146409 | 19    | 0.47 | 0.28 | 0.22 | 0.19   | NA |
| chr6 | 153303408 | 153304973 | FBXO5        | ENSG00000112029 | -37   | 0.21 | 0.25 | 0.22 | -0.037 | NA |
| chr6 | 163148376 | 163149017 | PARK2        | ENSG00000185345 | 4     | 0.25 | 0.2  | 0.22 | 0.049  | NA |
| chr6 | 3063811   | 3064553   | RIPK1        | ENSG00000137275 | 90    | 0.14 | 0.18 | 0.23 | -0.043 | NA |
| chr6 | 20212268  | 20213133  | RP11-239H6.2 | ENSG00000227803 | 382   | 0.23 | 0.16 | 0.23 | 0.069  | NA |
| chr6 | 34433411  | 34434371  | PACSIN1      | ENSG00000124507 | -25   | 0.21 | 0.17 | 0.23 | 0.041  | NA |
| chr6 | 151773043 | 151774070 | RMND1        | ENSG00000155906 | -302  | 0.22 | 0.18 | 0.23 | 0.041  | NA |
| chr6 | 39869579  | 39869800  | RP11-61I13.2 | ENSG00000240126 | -1842 | 0.97 | 0.91 | 0.24 | 0.064  | NA |
| chr6 | 40554595  | 40555928  | LRFN2        | ENSG00000156564 | -57   | 0.26 | 0.21 | 0.24 | 0.045  | NA |
| chr6 | 86387993  | 86389034  | SNHG5        | ENSG00000203875 | -275  | 0.22 | 0.18 | 0.24 | 0.042  | NA |
| chr6 | 116892235 | 116892934 | RWDD1        | ENSG00000111832 | 54    | 0.17 | 0.22 | 0.24 | -0.056 | NA |
| chr6 | 126307532 | 126307931 | TRMT11       | ENSG00000066651 | 155   | 0.18 | 0.23 | 0.24 | -0.05  | NA |
| chr6 | 139694219 | 139694599 | CITED2       | ENSG00000164442 | 672   | 0.2  | 0.12 | 0.24 | 0.079  | NA |
| chr6 | 13328587  | 13329096  | TBC1D7       | ENSG00000145979 | -104  | 0.18 | 0.12 | 0.25 | 0.051  | NA |

|      |           |           |               |                 |      |      |      |      |        |    |
|------|-----------|-----------|---------------|-----------------|------|------|------|------|--------|----|
| chr6 | 41908745  | 41909711  | CCND3         | ENSG00000112576 | -37  | 0.27 | 0.23 | 0.25 | 0.045  | NA |
| chr6 | 52441975  | 52442386  | RP1-180E22.3  | ENSG00000225791 | -103 | 0.19 | 0.14 | 0.25 | 0.046  | NA |
| chr6 | 117586482 | 117587156 | VGLL2         | ENSG00000170162 | 98   | 0.27 | 0.18 | 0.25 | 0.092  | NA |
| chr6 | 150070513 | 150071285 | PCMT1         | ENSG00000120265 | 320  | 0.14 | 0.11 | 0.26 | 0.032  | NA |
| chr6 | 168630046 | 168630390 | RP11-503C24.3 | ENSG00000228361 | -194 | 0.93 | 0.96 | 0.26 | -0.022 | NA |
| chr6 | 391188    | 393790    | IRF4          | ENSG00000137265 | 750  | 0.22 | 0.2  | 0.27 | 0.021  | NA |
| chr6 | 26271345  | 26271588  | HIST1H3G      | ENSG00000256018 | 146  | 0.33 | 0.21 | 0.27 | 0.12   | NA |
| chr6 | 28249166  | 28249568  | PGBD1         | ENSG00000137338 | 53   | 0.23 | 0.18 | 0.27 | 0.051  | NA |
| chr6 | 37321639  | 37322642  | RNF8          | ENSG00000112130 | 392  | 0.27 | 0.21 | 0.27 | 0.066  | NA |
| chr6 | 43395188  | 43395894  | ABCC10        | ENSG00000124574 | 255  | 0.4  | 0.3  | 0.27 | 0.095  | NA |
| chr6 | 169622297 | 169622520 | THBS2         | ENSG00000186340 | 1127 | 0.96 | 1    | 0.27 | -0.039 | NA |
| chr6 | 27342437  | 27342779  | ZNF391        | ENSG00000124613 | 214  | 0.3  | 0.21 | 0.28 | 0.086  | NA |
| chr6 | 160209941 | 160212015 | TCP1          | ENSG00000120438 | -374 | 0.25 | 0.21 | 0.28 | 0.035  | NA |
| chr6 | 37225358  | 37225700  | TMEM217       | ENSG00000172738 | -157 | 0.15 | 0.32 | 0.29 | -0.17  | NA |
| chr6 | 90348167  | 90348564  | LYRM2         | ENSG00000083099 | -164 | 0.19 | 0.25 | 0.29 | -0.06  | NA |
| chr6 | 91004795  | 91006944  | BACH2         | ENSG00000112182 | 592  | 0.19 | 0.17 | 0.29 | 0.024  | NA |
| chr6 | 10723022  | 10723609  | TMEM14C       | ENSG00000111843 | 167  | 0.21 | 0.11 | 0.3  | 0.1    | NA |
| chr6 | 35226897  | 35227851  | ZNF76         | ENSG00000065029 | 126  | 0.24 | 0.21 | 0.3  | 0.032  | NA |
| chr6 | 75914705  | 75916387  | COL12A1       | ENSG00000111799 | -8   | 0.18 | 0.22 | 0.3  | -0.042 | NA |
| chr6 | 107780774 | 107781409 | PDSS2         | ENSG00000164494 | -323 | 0.23 | 0.18 | 0.3  | 0.049  | NA |
| chr6 | 152128822 | 152129771 | ESR1          | ENSG00000091831 | 353  | 0.18 | 0.15 | 0.3  | 0.03   | NA |
| chr6 | 167275720 | 167276626 | RPS6KA2       | ENSG00000071242 | -174 | 0.24 | 0.17 | 0.3  | 0.066  | NA |
| chr6 | 3750788   | 3752767   | C6orf145      | ENSG00000168994 | -14  | 0.21 | 0.19 | 0.31 | 0.022  | NA |
| chr6 | 15244877  | 15246160  | JARID2        | ENSG00000008083 | -216 | 0.18 | 0.21 | 0.31 | -0.03  | NA |
| chr6 | 24403089  | 24403686  | MRS2          | ENSG00000124532 | 234  | 0.14 | 0.18 | 0.31 | -0.04  | NA |
| chr6 | 26550782  | 26551114  | AL121936.1    | ENSG00000242649 | 1829 | 0.22 | 0.15 | 0.31 | 0.079  | NA |
| chr6 | 36561907  | 36562412  | SRSF3         | ENSG00000112081 | 14   | 0.2  | 0.25 | 0.31 | -0.052 | NA |
| chr6 | 43211114  | 43211345  | TTBK1         | ENSG00000146216 | 7    | 1    | 0.5  | 0.31 | 0.5    | NA |
| chr6 | 46702736  | 46703316  | PLA2G7        | ENSG00000146070 | 50   | 0.41 | 0.29 | 0.31 | 0.12   | NA |
| chr6 | 27791780  | 27792217  | HIST1H4J      | ENSG00000197238 | 114  | 0.33 | 1    | 0.32 | -0.67  | NA |

|      |           |           |          |                 |      |      |      |      |        |    |
|------|-----------|-----------|----------|-----------------|------|------|------|------|--------|----|
| chr6 | 45982877  | 45983742  | CLIC5    | ENSG00000112782 | -26  | 0.24 | 0.2  | 0.32 | 0.034  | NA |
| chr6 | 84417597  | 84419378  | SNAP91   | ENSG00000065609 | -841 | 0.23 | 0.2  | 0.32 | 0.033  | NA |
| chr6 | 88299620  | 88299945  | RARS2    | ENSG00000146282 | -61  | 0.15 | 0.11 | 0.32 | 0.041  | NA |
| chr6 | 111279644 | 111280210 | GTF3C6   | ENSG00000155115 | 164  | 0.22 | 0.27 | 0.32 | -0.043 | NA |
| chr6 | 149068179 | 149069775 | UST      | ENSG00000111962 | 513  | 0.2  | 0.24 | 0.32 | -0.031 | NA |
| chr6 | 170151351 | 170152131 | TCTE3    | ENSG00000184786 | -86  | 0.23 | 0.18 | 0.32 | 0.042  | NA |
| chr6 | 36164132  | 36165205  | BRPF3    | ENSG00000096070 | 147  | 0.17 | 0.21 | 0.33 | -0.045 | NA |
| chr6 | 89827134  | 89828122  | SRSF12   | ENSG00000154548 | 66   | 0.23 | 0.27 | 0.33 | -0.036 | NA |
| chr6 | 135501988 | 135504245 | MYB      | ENSG00000118513 | 663  | 0.21 | 0.18 | 0.33 | 0.024  | NA |
| chr6 | 41888868  | 41889563  | MED20    | ENSG00000124641 | -338 | 0.17 | 0.21 | 0.34 | -0.035 | NA |
| chr6 | 107780235 | 107780456 | PDSS2    | ENSG00000164494 | 415  | 0.16 | 0.1  | 0.34 | 0.064  | NA |
| chr6 | 3231595   | 3232289   | PSMG4    | ENSG00000180822 | 305  | 0.22 | 0.31 | 0.35 | -0.081 | NA |
| chr6 | 7107075   | 7109854   | RREB1    | ENSG00000124782 | 634  | 0.2  | 0.22 | 0.35 | -0.02  | NA |
| chr6 | 84562820  | 84563758  | RIPPLY2  | ENSG00000203877 | 304  | 0.22 | 0.19 | 0.35 | 0.036  | NA |
| chr6 | 143857743 | 143858751 | PHACTR2  | ENSG00000112419 | 265  | 0.3  | 0.25 | 0.35 | 0.049  | NA |
| chr6 | 146284795 | 146285701 | SHPRH    | ENSG00000146414 | -15  | 0.17 | 0.2  | 0.36 | -0.029 | NA |
| chr6 | 7541518   | 7543472   | DSP      | ENSG00000096696 | 687  | 0.18 | 0.16 | 0.37 | 0.019  | NA |
| chr6 | 56708059  | 56709166  | DST      | ENSG00000151914 | -149 | 0.27 | 0.23 | 0.37 | 0.042  | NA |
| chr6 | 108395432 | 108396343 | OSTM1    | ENSG00000081087 | 54   | 0.16 | 0.18 | 0.37 | -0.029 | NA |
| chr6 | 139349955 | 139350740 | C6orf115 | ENSG00000146386 | 368  | 0.17 | 0.2  | 0.37 | -0.024 | NA |
| chr6 | 151561283 | 151562550 | AKAP12   | ENSG00000131016 | 407  | 0.2  | 0.17 | 0.37 | 0.03   | NA |
| chr6 | 160182429 | 160183770 | SOD2     | ENSG00000112096 | 265  | 0.23 | 0.19 | 0.37 | 0.032  | NA |
| chr6 | 34359620  | 34360802  | NUDT3    | ENSG00000112664 | 240  | 0.17 | 0.19 | 0.38 | -0.027 | NA |
| chr6 | 56954731  | 56955486  | ZNF451   | ENSG00000112200 | 300  | 0.19 | 0.15 | 0.38 | 0.041  | NA |
| chr6 | 74019428  | 74020053  | KHDC1    | ENSG00000135314 | 126  | 0.13 | 0.18 | 0.38 | -0.05  | NA |
| chr6 | 43149736  | 43150009  | CUL9     | ENSG00000112659 | -41  | 0.24 | 0.17 | 0.39 | 0.067  | NA |
| chr6 | 94126272  | 94129677  | EPHA7    | ENSG00000135333 | 1270 | 0.24 | 0.22 | 0.39 | 0.024  | NA |
| chr6 | 117803497 | 117804671 | DCBLD1   | ENSG00000164465 | 281  | 0.22 | 0.19 | 0.39 | 0.026  | NA |
| chr6 | 170604411 | 170606479 | FAM120B  | ENSG00000112584 | 1036 | 0.17 | 0.18 | 0.39 | -0.016 | NA |
| chr6 | 1389139   | 1391393   | FOXF2    | ENSG00000137273 | 197  | 0.2  | 0.18 | 0.4  | 0.024  | NA |

|      |           |           |              |                 |       |      |      |      |        |    |
|------|-----------|-----------|--------------|-----------------|-------|------|------|------|--------|----|
| chr6 | 34759534  | 34760309  | UHRF1BP1     | ENSG00000065060 | 64    | 0.2  | 0.17 | 0.4  | 0.033  | NA |
| chr6 | 52930050  | 52930758  | FBXO9        | ENSG00000112146 | 158   | 0.16 | 0.18 | 0.4  | -0.023 | NA |
| chr6 | 150038664 | 150039440 | LATS1        | ENSG00000131023 | 108   | 0.15 | 0.2  | 0.4  | -0.057 | NA |
| chr6 | 5260730   | 5261935   | LYRM4        | ENSG00000214113 | -450  | 0.23 | 0.26 | 0.41 | -0.032 | NA |
| chr6 | 26458310  | 26458534  | BTN2A1       | ENSG00000112763 | 226   | 0.28 | 0.21 | 0.41 | 0.067  | NA |
| chr6 | 36514995  | 36515308  | STK38        | ENSG00000112079 | 96    | 0.25 | 0.2  | 0.41 | 0.051  | NA |
| chr6 | 57036954  | 57037731  | BAG2         | ENSG00000112208 | 218   | 0.22 | 0.19 | 0.41 | 0.033  | NA |
| chr6 | 101328747 | 101329451 | ASCC3        | ENSG00000112249 | 78    | 0.18 | 0.15 | 0.41 | 0.034  | NA |
| chr6 | 127439265 | 127441072 | RSPO3        | ENSG00000146374 | 419   | 0.2  | 0.23 | 0.41 | -0.028 | NA |
| chr6 | 42713166  | 42713986  | TBCC         | ENSG00000124659 | 258   | 0.23 | 0.28 | 0.42 | -0.054 | NA |
| chr6 | 126068722 | 126071320 | HEY2         | ENSG00000135547 | 1211  | 0.23 | 0.21 | 0.42 | 0.022  | NA |
| chr6 | 147525374 | 147525848 | STXBP5       | ENSG00000164506 | 103   | 0.34 | 0.25 | 0.42 | 0.093  | NA |
| chr6 | 27440613  | 27441065  | ZNF184       | ENSG00000096654 | 58    | 0.3  | 0.41 | 0.43 | -0.11  | NA |
| chr6 | 80340861  | 80341346  | SH3BGRL2     | ENSG00000198478 | 103   | 0.26 | 0.32 | 0.43 | -0.058 | NA |
| chr6 | 158243601 | 158245035 | SNX9         | ENSG00000130340 | 37    | 0.2  | 0.18 | 0.43 | 0.017  | NA |
| chr6 | 17706292  | 17707339  | NUP153       | ENSG00000124789 | -197  | 0.26 | 0.23 | 0.44 | 0.034  | NA |
| chr6 | 24775046  | 24775729  | GMNN         | ENSG00000112312 | 228   | 0.22 | 0.31 | 0.44 | -0.088 | NA |
| chr6 | 146135434 | 146136165 | FBXO30       | ENSG00000118496 | 90    | 0.29 | 0.25 | 0.44 | 0.039  | NA |
| chr6 | 149867031 | 149867574 | PPIL4        | ENSG00000131013 | -128  | 0.16 | 0.19 | 0.44 | -0.029 | NA |
| chr6 | 158013812 | 158014256 | ZDHHC14      | ENSG00000175048 | -7    | 0.92 | 0.87 | 0.44 | 0.046  | NA |
| chr6 | 36646244  | 36648465  | CDKN1A       | ENSG00000124762 | 919   | 0.23 | 0.21 | 0.45 | 0.025  | NA |
| chr6 | 41753880  | 41755576  | FRS3         | ENSG00000137218 | -448  | 0.27 | 0.23 | 0.45 | 0.034  | NA |
| chr6 | 56297168  | 56297394  | RP3-361114.1 | ENSG00000220666 | 698   | 1    | 0.9  | 0.45 | 0.095  | NA |
| chr6 | 124124177 | 124125309 | NKAIN2       | ENSG00000188580 | -543  | 0.21 | 0.25 | 0.45 | -0.035 | NA |
| chr6 | 139013563 | 139014881 | RP11-390P2.4 | ENSG00000225177 | 537   | 0.18 | 0.16 | 0.45 | 0.021  | NA |
| chr6 | 143381444 | 143381918 | AIG1         | ENSG00000146416 | 48    | 0.21 | 0.24 | 0.45 | -0.031 | NA |
| chr6 | 144416219 | 144416854 | SF3B5        | ENSG00000169976 | 218   | 0.16 | 0.2  | 0.45 | -0.045 | NA |
| chr6 | 160221146 | 160221493 | PNLDC1       | ENSG00000146453 | 18    | 0.85 | 0.88 | 0.45 | -0.033 | NA |
| chr6 | 10421414  | 10421727  | TFAP2A       | ENSG00000137203 | -1678 | 0.19 | 0.29 | 0.46 | -0.1   | NA |
| chr6 | 37137070  | 37139434  | PIM1         | ENSG00000137193 | 273   | 0.23 | 0.2  | 0.46 | 0.02   | NA |

|      |           |           |               |                 |      |      |      |      |        |    |
|------|-----------|-----------|---------------|-----------------|------|------|------|------|--------|----|
| chr6 | 159065191 | 159065794 | DYNLT1        | ENSG00000146425 | 278  | 0.14 | 0.16 | 0.46 | -0.022 | NA |
| chr6 | 43484561  | 43484887  | YIPF3         | ENSG00000137207 | -67  | 0.33 | 0.43 | 0.47 | -0.1   | NA |
| chr6 | 170101662 | 170103059 | WDR27         | ENSG00000184465 | -611 | 0.21 | 0.23 | 0.47 | -0.021 | NA |
| chr6 | 10426200  | 10426638  | RP1-290I10.3  | ENSG00000228478 | -10  | 0.28 | 0.23 | 0.48 | 0.043  | NA |
| chr6 | 24645931  | 24646591  | KIAA0319      | ENSG00000137261 | -305 | 0.21 | 0.25 | 0.48 | -0.046 | NA |
| chr6 | 64282151  | 64283736  | PTP4A1        | ENSG00000112245 | 549  | 0.21 | 0.22 | 0.48 | -0.017 | NA |
| chr6 | 149638018 | 149639518 | TAB2          | ENSG00000055208 | -295 | 0.2  | 0.22 | 0.48 | -0.022 | NA |
| chr6 | 170067846 | 170068179 | WDR27         | ENSG00000184465 | -641 | 0.93 | 0.98 | 0.48 | -0.046 | NA |
| chr6 | 38607205  | 38607462  | BTBD9         | ENSG00000183826 | 311  | 0.34 | 0.27 | 0.49 | 0.067  | NA |
| chr6 | 100441406 | 100442152 | RP11-14I4.3   | ENSG00000229315 | -41  | 0.24 | 0.19 | 0.49 | 0.055  | NA |
| chr6 | 170190111 | 170190712 | C6orf208      | ENSG00000231690 | -6   | 0.45 | 0.34 | 0.49 | 0.12   | NA |
| chr6 | 2988855   | 2989549   | NQO2          | ENSG00000124588 | 322  | 0.15 | 0.12 | 0.5  | 0.033  | NA |
| chr6 | 6002471   | 6005125   | NRN1          | ENSG00000124785 | -602 | 0.2  | 0.22 | 0.5  | -0.02  | NA |
| chr6 | 26204764  | 26205213  | HIST1H4E      | ENSG00000198518 | 130  | 0.38 | 0.5  | 0.5  | -0.12  | NA |
| chr6 | 33588617  | 33589909  | ITPR3         | ENSG00000096433 | 741  | 0.23 | 0.21 | 0.5  | 0.02   | NA |
| chr6 | 168719681 | 168720495 | DACT2         | ENSG00000164488 | 314  | 0.43 | 0.48 | 0.5  | -0.053 | NA |
| chr6 | 2634372   | 2634945   | C6orf195      | ENSG00000164385 | 179  | 0.19 | 0.1  | 0.51 | 0.089  | NA |
| chr6 | 3227025   | 3229688   | TUBB2B        | ENSG00000137285 | -387 | 0.23 | 0.21 | 0.51 | 0.019  | NA |
| chr6 | 35995245  | 35996372  | MAPK14        | ENSG00000112062 | 320  | 0.19 | 0.21 | 0.51 | -0.025 | NA |
| chr6 | 42858169  | 42858960  | C6orf226      | ENSG00000221821 | -10  | 0.21 | 0.18 | 0.51 | 0.031  | NA |
| chr6 | 86351551  | 86353914  | SYNCRIP       | ENSG00000135316 | -23  | 0.22 | 0.2  | 0.51 | 0.021  | NA |
| chr6 | 110967011 | 110967823 | RP11-346C16.2 | ENSG00000213150 | 515  | 0.99 | 0.98 | 0.51 | 0.012  | NA |
| chr6 | 26184036  | 26184336  | HIST1H2BE     | ENSG00000197697 | 228  | 0.43 | 0.6  | 0.52 | -0.17  | NA |
| chr6 | 27835190  | 27835461  | HIST1H1B      | ENSG00000184357 | 34   | 0.19 | 0.24 | 0.52 | -0.05  | NA |
| chr6 | 27839698  | 27840069  | HIST1H3I      | ENSG00000182572 | 216  | 0.36 | 0.27 | 0.52 | 0.086  | NA |
| chr6 | 34856826  | 34857664  | ANKS1A        | ENSG00000064999 | 207  | 0.27 | 0.23 | 0.52 | 0.042  | NA |
| chr6 | 90062040  | 90062886  | UBE2J1        | ENSG00000241519 | -22  | 0.2  | 0.23 | 0.52 | -0.029 | NA |
| chr6 | 138482534 | 138483710 | KIAA1244      | ENSG00000112379 | 64   | 0.26 | 0.23 | 0.52 | 0.025  | NA |
| chr6 | 19804854  | 19805371  | RP4-625H18.2  | ENSG00000228412 | -235 | 0.2  | 0.17 | 0.53 | 0.029  | NA |
| chr6 | 35310150  | 35310686  | PPARD         | ENSG00000112033 | 83   | 0.16 | 0.13 | 0.53 | 0.027  | NA |



|      |           |           |               |                 |      |      |      |      |        |    |
|------|-----------|-----------|---------------|-----------------|------|------|------|------|--------|----|
| chr6 | 35435810  | 35437084  | RPL10A        | ENSG00000198755 | 262  | 0.18 | 0.2  | 0.53 | -0.017 | NA |
| chr6 | 41701881  | 41703481  | TFEB          | ENSG00000112561 | -749 | 0.2  | 0.18 | 0.53 | 0.014  | NA |
| chr6 | 88182368  | 88183202  | SLC35A1       | ENSG00000164414 | 142  | 0.21 | 0.24 | 0.53 | -0.031 | NA |
| chr6 | 114291411 | 114292767 | HDAC2         | ENSG00000196591 | -430 | 0.23 | 0.21 | 0.53 | 0.017  | NA |
| chr6 | 158402072 | 158403444 | SYNJ2         | ENSG00000078269 | -130 | 0.27 | 0.29 | 0.53 | -0.018 | NA |
| chr6 | 143771610 | 143772084 | ADAT2         | ENSG00000189007 | -37  | 0.2  | 0.24 | 0.54 | -0.037 | NA |
| chr6 | 26217211  | 26217521  | HIST1H2AE     | ENSG00000168274 | 201  | 0.18 | 0.25 | 0.55 | -0.07  | NA |
| chr6 | 41068475  | 41069343  | RP1-34B21.6   | ENSG00000243743 | 148  | 0.95 | 0.94 | 0.55 | 0.015  | NA |
| chr6 | 43138711  | 43140292  | SRF           | ENSG00000112658 | 464  | 0.2  | 0.19 | 0.55 | 0.015  | NA |
| chr6 | 74079389  | 74079723  | OOEP-AS1      | ENSG00000231332 | 129  | 0.98 | 0.99 | 0.55 | -0.012 | NA |
| chr6 | 116574906 | 116575367 | TSPYL4        | ENSG00000187189 | 125  | 0.28 | 0.24 | 0.55 | 0.048  | NA |
| chr6 | 117996395 | 117997375 | AL590303.1    | ENSG00000245439 | -438 | 0.16 | 0.2  | 0.55 | -0.039 | NA |
| chr6 | 20404072  | 20404367  | E2F3          | ENSG00000112242 | 185  | 0.33 | 0.26 | 0.56 | 0.07   | NA |
| chr6 | 117923356 | 117923964 | GOPC          | ENSG00000047932 | -133 | 0.17 | 0.24 | 0.56 | -0.066 | NA |
| chr6 | 43543124  | 43544076  | XPO5          | ENSG00000124571 | 122  | 0.2  | 0.19 | 0.57 | 0.017  | NA |
| chr6 | 110011589 | 110011804 | AKD1          | ENSG00000155085 | 13   | 0.36 | 0.27 | 0.57 | 0.083  | NA |
| chr6 | 110679417 | 110679833 | C6orf186      | ENSG00000053328 | -150 | 0.24 | 0.21 | 0.57 | 0.027  | NA |
| chr6 | 155316299 | 155317197 | TIAM2         | ENSG00000146426 | 260  | 0.2  | 0.18 | 0.57 | 0.02   | NA |
| chr6 | 34393325  | 34394014  | RPS10         | ENSG00000124614 | -312 | 0.4  | 0.3  | 0.58 | 0.1    | NA |
| chr6 | 80816119  | 80816686  | BCKDHB        | ENSG00000083123 | 38   | 0.2  | 0.17 | 0.58 | 0.034  | NA |
| chr6 | 82956999  | 82957507  | IBTK          | ENSG00000005700 | 135  | 0.22 | 0.18 | 0.58 | 0.038  | NA |
| chr6 | 89672884  | 89673579  | RNGTT         | ENSG00000111880 | 49   | 0.23 | 0.2  | 0.58 | 0.029  | NA |
| chr6 | 76458437  | 76459267  | MYO6          | ENSG00000196586 | -57  | 0.13 | 0.11 | 0.59 | 0.014  | NA |
| chr6 | 125283124 | 125284389 | RNF217        | ENSG00000146373 | -106 | 0.26 | 0.24 | 0.59 | 0.021  | NA |
| chr6 | 125474804 | 125475722 | TPD52L1       | ENSG00000111907 | 384  | 0.24 | 0.2  | 0.59 | 0.038  | NA |
| chr6 | 26987598  | 26988074  | TRNAI2        | ENSG00000238621 | -278 | 0.23 | 0.19 | 0.6  | 0.033  | NA |
| chr6 | 43142013  | 43142217  | SRF           | ENSG00000112658 | 1987 | 0.18 | 0.24 | 0.6  | -0.064 | NA |
| chr6 | 137540126 | 137540678 | IFNGR1        | ENSG00000027697 | 97   | 0.22 | 0.18 | 0.6  | 0.039  | NA |
| chr6 | 167369439 | 167370588 | RP11-514O12.4 | ENSG00000249141 | -401 | 0.16 | 0.18 | 0.6  | -0.016 | NA |
| chr6 | 4135175   | 4136460   | RP3-400B16.4  | ENSG00000254821 | 160  | 0.24 | 0.22 | 0.61 | 0.018  | NA |

|      |           |           |           |                 |      |      |      |      |        |    |
|------|-----------|-----------|-----------|-----------------|------|------|------|------|--------|----|
| chr6 | 10404362  | 10405180  | TFAP2A    | ENSG00000137203 | 56   | 0.28 | 0.25 | 0.61 | 0.032  | NA |
| chr6 | 13574438  | 13575110  | SIRT5     | ENSG00000124523 | -52  | 0.2  | 0.23 | 0.61 | -0.028 | NA |
| chr6 | 17600382  | 17601397  | FAM8A1    | ENSG00000137414 | 306  | 0.17 | 0.19 | 0.61 | -0.02  | NA |
| chr6 | 39760066  | 39760426  | DAAM2     | ENSG00000146122 | 104  | 0.17 | 0.2  | 0.62 | -0.025 | NA |
| chr6 | 70576974  | 70577572  | COL19A1   | ENSG00000082293 | -168 | 0.22 | 0.18 | 0.62 | 0.034  | NA |
| chr6 | 3000069   | 3000520   | NQO2      | ENSG00000124588 | 184  | 0.17 | 0.15 | 0.63 | 0.022  | NA |
| chr6 | 26027160  | 26027626  | HIST1H4B  | ENSG00000124529 | 87   | 0.25 | 0.2  | 0.63 | 0.04   | NA |
| chr6 | 26124493  | 26124782  | HIST1H2AC | ENSG00000180573 | 219  | 0.14 | 0.17 | 0.63 | -0.028 | NA |
| chr6 | 36842308  | 36842845  | PPIL1     | ENSG00000137168 | 224  | 0.29 | 0.24 | 0.63 | 0.05   | NA |
| chr6 | 53212617  | 53214043  | ELOVL5    | ENSG00000012660 | 257  | 0.23 | 0.21 | 0.63 | 0.015  | NA |
| chr6 | 75911579  | 75912133  | COL12A1   | ENSG00000111799 | 652  | 0.2  | 0.16 | 0.63 | 0.037  | NA |
| chr6 | 137143635 | 137144445 | PEX7      | ENSG00000112357 | 323  | 0.21 | 0.19 | 0.63 | 0.024  | NA |
| chr6 | 158588887 | 158589449 | SERAC1    | ENSG00000122335 | 123  | 0.15 | 0.18 | 0.63 | -0.024 | NA |
| chr6 | 96025241  | 96026042  | MANEA     | ENSG00000172469 | 222  | 0.19 | 0.12 | 0.64 | 0.07   | NA |
| chr6 | 99841661  | 99842146  | COQ3      | ENSG00000132423 | 164  | 0.19 | 0.16 | 0.64 | 0.026  | NA |
| chr6 | 109169468 | 109170103 | ARMC2     | ENSG00000118690 | 166  | 0.18 | 0.2  | 0.64 | -0.021 | NA |
| chr6 | 17987415  | 17988405  | KIF13A    | ENSG00000137177 | -216 | 0.23 | 0.22 | 0.65 | 0.015  | NA |
| chr6 | 25279131  | 25279890  | LRRRC16A  | ENSG00000079691 | 204  | 0.24 | 0.21 | 0.65 | 0.026  | NA |
| chr6 | 52226753  | 52228006  | PAQR8     | ENSG00000170915 | 453  | 0.21 | 0.2  | 0.65 | 0.014  | NA |
| chr6 | 151662605 | 151663056 | AKAP12    | ENSG00000131016 | 9    | 0.97 | 0.99 | 0.65 | -0.016 | NA |
| chr6 | 170863398 | 170863823 | TBP       | ENSG00000112592 | 189  | 0.14 | 0.19 | 0.65 | -0.048 | NA |
| chr6 | 2245118   | 2246153   | GMDS      | ENSG00000112699 | 291  | 0.18 | 0.16 | 0.66 | 0.013  | NA |
| chr6 | 33756063  | 33757006  | LEMD2     | ENSG00000161904 | 73   | 0.19 | 0.18 | 0.66 | 0.016  | NA |
| chr6 | 110678854 | 110679108 | C6orf186  | ENSG00000053328 | 199  | 0.27 | 0.32 | 0.66 | -0.054 | NA |
| chr6 | 116421673 | 116422382 | NT5DC1    | ENSG00000178425 | 28   | 0.22 | 0.21 | 0.66 | 0.014  | NA |
| chr6 | 134273310 | 134274844 | TBPL1     | ENSG00000028839 | 653  | 0.17 | 0.19 | 0.66 | -0.015 | NA |
| chr6 | 166401526 | 166402659 | C6orf176  | ENSG00000223414 | -565 | 0.26 | 0.24 | 0.66 | 0.02   | NA |
| chr6 | 44253897  | 44254150  | TCTE1     | ENSG00000146221 | 67   | 0.97 | 1    | 0.67 | -0.031 | NA |
| chr6 | 55443732  | 55444092  | HMGCLL1   | ENSG00000146151 | -41  | 0.23 | 0.2  | 0.67 | 0.023  | NA |
| chr6 | 71998106  | 71999109  | OGFRL1    | ENSG00000119900 | 101  | 0.28 | 0.31 | 0.67 | -0.03  | NA |

|      |           |           |               |                 |      |      |      |      |         |    |
|------|-----------|-----------|---------------|-----------------|------|------|------|------|---------|----|
| chr6 | 114179734 | 114181226 | MARCKS        | ENSG00000155130 | 1939 | 0.2  | 0.19 | 0.67 | 0.016   | NA |
| chr6 | 127835928 | 127836255 | RP3-403A15.5  | ENSG00000255330 | 1668 | 0.16 | 0.19 | 0.67 | -0.024  | NA |
| chr6 | 34216408  | 34217348  | C6orf1        | ENSG00000186577 | -116 | 0.15 | 0.14 | 0.68 | 0.015   | NA |
| chr6 | 90539454  | 90539954  | CASP8AP2      | ENSG00000118412 | 91   | 0.07 | 0.11 | 0.68 | -0.037  | NA |
| chr6 | 133562086 | 133563586 | EYA4          | ENSG00000112319 | 347  | 0.17 | 0.18 | 0.68 | -0.012  | NA |
| chr6 | 1515515   | 1515798   | RP11-157J24.1 | ENSG00000218027 | -132 | 0.98 | 0.97 | 0.69 | 0.015   | NA |
| chr6 | 132271826 | 132272566 | RP11-69I8.3   | ENSG00000227220 | 110  | 0.2  | 0.22 | 0.69 | -0.015  | NA |
| chr6 | 83775374  | 83775766  | UBE2CBP       | ENSG00000118420 | -100 | 0.22 | 0.3  | 0.7  | -0.077  | NA |
| chr6 | 28234842  | 28235124  | ZNF187        | ENSG00000197062 | 56   | 0.25 | 0.38 | 0.71 | -0.13   | NA |
| chr6 | 108496715 | 108497320 | NR2E1         | ENSG00000112333 | -291 | 0.23 | 0.27 | 0.71 | -0.041  | NA |
| chr6 | 139694811 | 139696578 | CITED2        | ENSG00000164442 | -613 | 0.24 | 0.22 | 0.71 | 0.015   | NA |
| chr6 | 27218792  | 27219813  | PRSS16        | ENSG00000112812 | 452  | 0.22 | 0.4  | 0.72 | -0.18   | NA |
| chr6 | 36929837  | 36930135  | PI16          | ENSG00000164530 | -780 | 0.61 | 0.57 | 0.72 | 0.038   | NA |
| chr6 | 66497675  | 66498033  | RP11-707M13.1 | ENSG00000220483 | -456 | 0.98 | 0.97 | 0.72 | 0.014   | NA |
| chr6 | 71122892  | 71123820  | FAM135A       | ENSG00000082269 | 345  | 0.17 | 0.18 | 0.72 | -0.011  | NA |
| chr6 | 119399091 | 119400223 | FAM184A       | ENSG00000111879 | -120 | 0.23 | 0.21 | 0.72 | 0.016   | NA |
| chr6 | 128840158 | 128842126 | PTPRK         | ENSG00000152894 | 361  | 0.2  | 0.19 | 0.72 | 0.014   | NA |
| chr6 | 168378748 | 168379044 | RP3-470B24.5  | ENSG00000235994 | 157  | 0.91 | 0.93 | 0.72 | -0.022  | NA |
| chr6 | 135818501 | 135819160 | AHI1          | ENSG00000135541 | -43  | 0.16 | 0.13 | 0.73 | 0.022   | NA |
| chr6 | 160147729 | 160149065 | SOD2          | ENSG00000112096 | -421 | 0.24 | 0.23 | 0.73 | 0.015   | NA |
| chr6 | 41773954  | 41774420  | USP49         | ENSG00000164663 | 534  | 0.97 | 0.96 | 0.74 | 0.0098  | NA |
| chr6 | 90529137  | 90529698  | MDN1          | ENSG00000112159 | 20   | 0.19 | 0.17 | 0.74 | 0.019   | NA |
| chr6 | 170615241 | 170616210 | FAM120B       | ENSG00000112584 | -105 | 0.18 | 0.17 | 0.74 | 0.0094  | NA |
| chr6 | 16238589  | 16239231  | GMPR          | ENSG00000137198 | 99   | 0.24 | 0.27 | 0.75 | -0.03   | NA |
| chr6 | 42420075  | 42421090  | TRERF1        | ENSG00000124496 | -793 | 0.22 | 0.24 | 0.75 | -0.021  | NA |
| chr6 | 111580363 | 111580887 | KIAA1919      | ENSG00000173214 | 74   | 0.21 | 0.19 | 0.75 | 0.023   | NA |
| chr6 | 1524153   | 1524543   | AL512329.1    | ENSG00000240850 | 1202 | 0.31 | 0.28 | 0.76 | 0.032   | NA |
| chr6 | 42946310  | 42947127  | PEX6          | ENSG00000124587 | 170  | 0.23 | 0.21 | 0.76 | 0.017   | NA |
| chr6 | 58287429  | 58287828  | GUSBP4        | ENSG00000215190 | 30   | 0.37 | 0.2  | 0.76 | 0.17    | NA |
| chr6 | 166073882 | 166077752 | PDE10A        | ENSG00000112541 | -233 | 0.22 | 0.23 | 0.76 | -0.0063 | NA |

|      |           |           |          |                 |      |      |      |      |         |    |
|------|-----------|-----------|----------|-----------------|------|------|------|------|---------|----|
| chr6 | 36098039  | 36098621  | MAPK13   | ENSG00000156711 | 232  | 0.15 | 0.13 | 0.77 | 0.02    | NA |
| chr6 | 100016069 | 100016775 | CCNC     | ENSG00000112237 | -319 | 0.25 | 0.23 | 0.77 | 0.024   | NA |
| chr6 | 39692743  | 39692966  | KIF6     | ENSG00000164627 | 257  | 0.22 | 0.12 | 0.78 | 0.1     | NA |
| chr6 | 47276455  | 47277823  | TNFRSF21 | ENSG00000146072 | 502  | 0.21 | 0.22 | 0.78 | -0.011  | NA |
| chr6 | 55039170  | 55039392  | HCRTR2   | ENSG00000137252 | 231  | 0.25 | 0.21 | 0.78 | 0.045   | NA |
| chr6 | 112408406 | 112408910 | TUBE1    | ENSG00000074935 | 24   | 0.18 | 0.22 | 0.78 | -0.041  | NA |
| chr6 | 3068530   | 3069354   | RIPK1    | ENSG00000137275 | 201  | 0.19 | 0.18 | 0.79 | 0.011   | NA |
| chr6 | 44238131  | 44238689  | TMEM151B | ENSG00000178233 | 207  | 0.2  | 0.17 | 0.79 | 0.032   | NA |
| chr6 | 48036137  | 48036410  | C6orf138 | ENSG00000244694 | 107  | 0.25 | 0.22 | 0.79 | 0.033   | NA |
| chr6 | 134638797 | 134639021 | SGK1     | ENSG00000118515 | 140  | 0.22 | 0.25 | 0.79 | -0.026  | NA |
| chr6 | 5004062   | 5004372   | RPP40    | ENSG00000124787 | 35   | 0.19 | 0.21 | 0.8  | -0.017  | NA |
| chr6 | 84743357  | 84743948  | MRAP2    | ENSG00000135324 | 177  | 0.23 | 0.21 | 0.8  | 0.015   | NA |
| chr6 | 3157400   | 3158418   | TUBB2A   | ENSG00000137267 | -149 | 0.17 | 0.17 | 0.81 | -0.008  | NA |
| chr6 | 13925099  | 13925510  | RNF182   | ENSG00000180537 | 177  | 0.19 | 0.22 | 0.81 | -0.024  | NA |
| chr6 | 43596790  | 43597690  | GTPBP2   | ENSG00000172432 | -341 | 0.21 | 0.19 | 0.81 | 0.018   | NA |
| chr6 | 130340556 | 130342450 | L3MBTL3  | ENSG00000198945 | -133 | 0.19 | 0.2  | 0.81 | -0.009  | NA |
| chr6 | 3118572   | 3119292   | BPHL     | ENSG00000137274 | 324  | 0.2  | 0.21 | 0.82 | -0.011  | NA |
| chr6 | 42419510  | 42419743  | TRERF1   | ENSG00000124496 | 157  | 0.31 | 0.27 | 0.82 | 0.036   | NA |
| chr6 | 79943403  | 79944550  | HMG3     | ENSG00000118418 | 430  | 0.17 | 0.15 | 0.82 | 0.023   | NA |
| chr6 | 152623279 | 152623480 | SYNE1    | ENSG00000131018 | 25   | 0.5  | 0.17 | 0.82 | 0.33    | NA |
| chr6 | 152957810 | 152958472 | SYNE1    | ENSG00000131018 | -323 | 0.17 | 0.18 | 0.82 | -0.013  | NA |
| chr6 | 170893259 | 170893898 | PDCD2    | ENSG00000071994 | -264 | 0.18 | 0.16 | 0.82 | 0.013   | NA |
| chr6 | 35655607  | 35656856  | FKBP5    | ENSG00000096060 | 461  | 0.23 | 0.24 | 0.83 | -0.0082 | NA |
| chr6 | 35695725  | 35696156  | FKBP5    | ENSG00000096060 | 418  | 0.22 | 0.2  | 0.83 | 0.017   | NA |
| chr6 | 116600494 | 116601174 | TSPYL1   | ENSG00000189241 | 216  | 0.22 | 0.3  | 0.83 | -0.084  | NA |
| chr6 | 27356492  | 27357020  | ZNF391   | ENSG00000124613 | 259  | 0.21 | 0.17 | 0.84 | 0.036   | NA |
| chr6 | 36806881  | 36807217  | CPNE5    | ENSG00000124772 | 729  | 0.26 | 0.25 | 0.84 | 0.014   | NA |
| chr6 | 150262703 | 150263677 | ULBP2    | ENSG00000131015 | 54   | 0.25 | 0.23 | 0.84 | 0.017   | NA |
| chr6 | 31238852  | 31240120  | HLA-C    | ENSG00000204525 | 341  | 0.38 | 1    | 0.85 | -0.62   | NA |
| chr6 | 99962953  | 99963478  | USP45    | ENSG00000123552 | 37   | 0.16 | 0.17 | 0.85 | -0.015  | NA |

|      |           |           |           |                 |       |      |      |      |         |    |
|------|-----------|-----------|-----------|-----------------|-------|------|------|------|---------|----|
| chr6 | 656409    | 657155    | HUS1B     | ENSG00000188996 | 181   | 0.98 | 0.97 | 0.86 | 0.0071  | NA |
| chr6 | 24910626  | 24911285  | FAM65B    | ENSG00000111913 | 240   | 0.22 | 0.19 | 0.86 | 0.022   | NA |
| chr6 | 110299365 | 110301267 | GPR6      | ENSG00000146360 | 807   | 0.18 | 0.19 | 0.86 | -0.011  | NA |
| chr6 | 151186747 | 151188112 | MTHFD1L   | ENSG00000120254 | 349   | 0.2  | 0.19 | 0.86 | 0.007   | NA |
| chr6 | 168352516 | 168352728 | MLLT4     | ENSG00000130396 | 38    | 1    | 0.98 | 0.86 | 0.021   | NA |
| chr6 | 26199838  | 26200120  | HIST1H2BF | ENSG00000197846 | 231   | 0.37 | 0.32 | 0.87 | 0.05    | NA |
| chr6 | 34855604  | 34855888  | TAF11     | ENSG00000064995 | 73    | 0.17 | 0.23 | 0.87 | -0.064  | NA |
| chr6 | 111195383 | 111197576 | AMD1      | ENSG00000123505 | 506   | 0.2  | 0.21 | 0.87 | -0.0061 | NA |
| chr6 | 151814980 | 151815527 | C6orf97   | ENSG00000120262 | 88    | 0.22 | 0.21 | 0.87 | 0.013   | NA |
| chr6 | 168841438 | 168841699 | SMOC2     | ENSG00000112562 | -263  | 0.19 | 0.21 | 0.87 | -0.018  | NA |
| chr6 | 26197070  | 26197537  | HIST1H3D  | ENSG00000197409 | 175   | 0.38 | 0.5  | 0.88 | -0.12   | NA |
| chr6 | 72892037  | 72892877  | RIMS1     | ENSG00000079841 | 2     | 0.19 | 0.18 | 0.88 | 0.0054  | NA |
| chr6 | 86159425  | 86160395  | NT5E      | ENSG00000135318 | 101   | 0.2  | 0.2  | 0.88 | -0.0064 | NA |
| chr6 | 154360586 | 154361008 | OPRM1     | ENSG00000112038 | 206   | 0.18 | 0.1  | 0.88 | 0.082   | NA |
| chr6 | 168479566 | 168479809 | FRMD1     | ENSG00000153303 | 152   | 1    | 0.99 | 0.88 | 0.012   | NA |
| chr6 | 80656744  | 80657593  | ELOVL4    | ENSG00000118402 | 129   | 0.24 | 0.23 | 0.89 | 0.0087  | NA |
| chr6 | 87864919  | 87866096  | ZNF292    | ENSG00000188994 | 240   | 0.3  | 0.27 | 0.89 | 0.028   | NA |
| chr6 | 153323534 | 153324320 | MTRF1L    | ENSG00000112031 | -256  | 0.23 | 0.22 | 0.89 | 0.0098  | NA |
| chr6 | 10694617  | 10695352  | C6orf52   | ENSG00000137434 | -218  | 0.19 | 0.18 | 0.9  | 0.0094  | NA |
| chr6 | 28192961  | 28193284  | ZNF193    | ENSG00000137185 | 80    | 0.26 | 0.28 | 0.9  | -0.02   | NA |
| chr6 | 159589636 | 159591319 | FNDC1     | ENSG00000164694 | 48    | 0.23 | 0.24 | 0.9  | -0.0057 | NA |
| chr6 | 26199197  | 26199466  | HIST1H2AD | ENSG00000196866 | 140   | 0.15 | 0.19 | 0.91 | -0.032  | NA |
| chr6 | 33679158  | 33679701  | C6orf125  | ENSG00000137288 | 75    | 0.16 | 0.17 | 0.91 | -0.013  | NA |
| chr6 | 44355156  | 44355778  | CDC5L     | ENSG00000096401 | 205   | 0.29 | 0.27 | 0.91 | 0.021   | NA |
| chr6 | 52926278  | 52926863  | ICK       | ENSG00000112144 | -2    | 0.13 | 0.14 | 0.91 | -0.0079 | NA |
| chr6 | 57086396  | 57087311  | RAB23     | ENSG00000112210 | 223   | 0.19 | 0.2  | 0.91 | -0.012  | NA |
| chr6 | 88117707  | 88118363  | C6orf165  | ENSG00000213204 | 305   | 0.15 | 0.16 | 0.91 | -0.0092 | NA |
| chr6 | 106958232 | 106958718 | AIM1      | ENSG00000112297 | -1255 | 0.39 | 0.35 | 0.91 | 0.032   | NA |
| chr6 | 10411394  | 10413857  | TFAP2A    | ENSG00000137203 | -346  | 0.2  | 0.2  | 0.92 | -0.0041 | NA |
| chr6 | 10838098  | 10838915  | MAK       | ENSG00000111837 | 222   | 0.25 | 0.24 | 0.92 | 0.012   | NA |

|      |           |           |               |                 |       |      |      |      |         |    |
|------|-----------|-----------|---------------|-----------------|-------|------|------|------|---------|----|
| chr6 | 12012543  | 12013379  | HIVEP1        | ENSG00000095951 | 390   | 0.31 | 0.29 | 0.92 | 0.024   | NA |
| chr6 | 27858166  | 27858564  | HIST1H3J      | ENSG00000197153 | 205   | 0.32 | 0.29 | 0.92 | 0.035   | NA |
| chr6 | 83777271  | 83777690  | DOPEY1        | ENSG00000083097 | 95    | 0.19 | 0.2  | 0.92 | -0.0077 | NA |
| chr6 | 166755812 | 166756510 | SFT2D1        | ENSG00000198818 | -126  | 0.17 | 0.16 | 0.92 | 0.0093  | NA |
| chr6 | 38607777  | 38608148  | BTBD9         | ENSG00000183826 | -38   | 0.22 | 0.2  | 0.93 | 0.02    | NA |
| chr6 | 127587833 | 127588602 | RNF146        | ENSG00000118518 | 346   | 0.18 | 0.17 | 0.93 | 0.0055  | NA |
| chr6 | 138187825 | 138189141 | TNFAIP3       | ENSG00000118503 | 132   | 0.2  | 0.2  | 0.93 | -0.0058 | NA |
| chr6 | 168377416 | 168377724 | RP3-470B24.5  | ENSG00000235994 | 49    | 0.94 | 0.95 | 0.93 | -0.01   | NA |
| chr6 | 20402003  | 20403886  | E2F3          | ENSG00000112242 | 807   | 0.22 | 0.23 | 0.94 | -0.0035 | NA |
| chr6 | 41748132  | 41748672  | FRS3          | ENSG00000137218 | -198  | 0.2  | 0.19 | 0.94 | 0.0087  | NA |
| chr6 | 42714707  | 42715042  | KIAA0240      | ENSG00000112624 | 178   | 0.27 | 0.26 | 0.94 | 0.013   | NA |
| chr6 | 44224698  | 44225486  | SLC35B2       | ENSG00000157593 | 173   | 0.22 | 0.21 | 0.94 | 0.0062  | NA |
| chr6 | 138428188 | 138428816 | PERP          | ENSG00000112378 | 54    | 0.67 | 0.45 | 0.94 | 0.21    | NA |
| chr6 | 168226063 | 168228559 | C6orf124      | ENSG00000198221 | -1171 | 0.21 | 0.21 | 0.94 | -0.0027 | NA |
| chr6 | 17280739  | 17282334  | RBM24         | ENSG00000112183 | -41   | 0.24 | 0.24 | 0.95 | -0.0033 | NA |
| chr6 | 36953667  | 36954470  | MTCH1         | ENSG00000137409 | -311  | 0.22 | 0.23 | 0.95 | -0.011  | NA |
| chr6 | 111803556 | 111805509 | REV3L         | ENSG00000009413 | -410  | 0.23 | 0.23 | 0.95 | -0.004  | NA |
| chr6 | 27805843  | 27806853  | HIST1H2AK     | ENSG00000184348 | -231  | 0.16 | 0.18 | 0.96 | -0.023  | NA |
| chr6 | 85472702  | 85474132  | TBX18         | ENSG00000112837 | -239  | 0.25 | 0.24 | 0.96 | 0.0073  | NA |
| chr6 | 97730696  | 97731199  | MMS22L        | ENSG00000146263 | 105   | 0.19 | 0.2  | 0.96 | -0.0093 | NA |
| chr6 | 119255738 | 119256331 | RP11-351A11.1 | ENSG00000253194 | 84    | 0.2  | 0.2  | 0.96 | 0.0069  | NA |
| chr6 | 158957220 | 158958677 | TMEM181       | ENSG00000146433 | 482   | 0.25 | 0.22 | 0.97 | 0.029   | NA |
| chr6 | 26659536  | 26660165  | ZNF322A       | ENSG00000181315 | 63    | 0.23 | 0.22 | 0.98 | 0.0079  | NA |
| chr6 | 46620541  | 46621189  | SLC25A27      | ENSG00000153291 | 187   | 0.23 | 0.22 | 0.98 | 0.0056  | NA |
| chr6 | 148663425 | 148664041 | SASH1         | ENSG00000111961 | 4     | 0.25 | 0.27 | 0.98 | -0.019  | NA |
| chr6 | 7910087   | 7911418   | MUTED         | ENSG00000188428 | -625  | 0.29 | 0.3  | 0.99 | -0.0053 | NA |
| chr6 | 33560892  | 33561189  | C6orf227      | ENSG00000197251 | 75    | 0.97 | 0.92 | 0.99 | 0.056   | NA |
| chr6 | 56298003  | 56298214  | RP3-361I14.1  | ENSG00000220666 | -129  | 0.9  | 0.88 | 0.99 | 0.021   | NA |
| chr6 | 112683759 | 112683979 | KRT18P32      | ENSG00000215807 | 55    | 0.97 | 0.96 | 0.99 | 0.014   | NA |
| chr6 | 147828733 | 147830298 | SAMD5         | ENSG00000203727 | -548  | 0.21 | 0.21 | 0.99 | 0.0027  | NA |

|      |           |           |              |                 |      |      |      |      |         |    |
|------|-----------|-----------|--------------|-----------------|------|------|------|------|---------|----|
| chr6 | 150067323 | 150067766 | NUP43        | ENSG00000120253 | 114  | 0.21 | 0.21 | 0.99 | 0.007   | NA |
| chr6 | 2765203   | 2766775   | WRNIP1       | ENSG00000124535 | 341  | 0.24 | 0.24 | 1    | -0.0003 | NA |
| chr6 | 4021444   | 4022004   | RP3-406P24.3 | ENSG00000230648 | -275 | 0.22 | 0.22 | 1    | 0.00074 | NA |
| chr6 | 7141036   | 7141576   | RREB1        | ENSG00000124782 | 1828 | 0.22 | 0.22 | 1    | #####   | NA |
| chr6 | 7728885   | 7729108   | BMP6         | ENSG00000153162 | 1904 | 0.19 | 0.25 | 1    | -0.059  | NA |
| chr6 | 7986333   | 7986847   | PIP5K1P1     | ENSG00000219294 | -140 | 0.97 | 0.97 | 1    | 0.0058  | NA |
| chr6 | 8102504   | 8102885   | EEF1E1       | ENSG00000124802 | 20   | 0.12 | 0.13 | 1    | -0.0058 | NA |
| chr6 | 8435314   | 8436141   | SLC35B3      | ENSG00000124786 | -11  | 0.25 | 0.24 | 1    | 0.0059  | NA |
| chr6 | 18387450  | 18387846  | RNF144B      | ENSG00000137393 | 67   | 0.28 | 0.29 | 1    | -0.0019 | NA |
| chr6 | 19837014  | 19837228  | ID4          | ENSG00000172201 | -496 | 0.17 | 0.2  | 1    | -0.033  | NA |
| chr6 | 22569584  | 22570705  | HDGFL1       | ENSG00000112273 | 466  | 0.98 | 0.98 | 1    | 0.0013  | NA |
| chr6 | 24666538  | 24667395  | TDP2         | ENSG00000111802 | -147 | 0.21 | 0.21 | 1    | 0.0029  | NA |
| chr6 | 26031880  | 26032264  | HIST1H3B     | ENSG00000124693 | 216  | 0.24 | 0.2  | 1    | 0.041   | NA |
| chr6 | 26045644  | 26046033  | HIST1H3C     | ENSG00000196532 | 199  | 0.2  | 0.21 | 1    | -0.0038 | NA |
| chr6 | 26225386  | 26225790  | HIST1H3E     | ENSG00000196966 | 205  | 0.25 | 0.25 | 1    | -0.0029 | NA |
| chr6 | 26246815  | 26247100  | HIST1H4G     | ENSG00000124578 | 302  | 1    | 1    | 1    | 0       | NA |
| chr6 | 26251898  | 26252233  | HIST1H2BH    | ENSG00000197459 | 186  | 0.33 | 0.18 | 1    | 0.16    | NA |
| chr6 | 27598687  | 27599146  | TRNAI6       | ENSG00000238648 | -272 | 0.23 | 0.22 | 1    | 0.0086  | NA |
| chr6 | 27861317  | 27861595  | HIST1H2BO    | ENSG00000196331 | 253  | 0.2  | 0.18 | 1    | 0.016   | NA |
| chr6 | 28219523  | 28219745  | ZKSCAN4      | ENSG00000187626 | -32  | 0.15 | 0.15 | 1    | 0.003   | NA |
| chr6 | 28367124  | 28367651  | ZSCAN12      | ENSG00000158691 | 121  | 0.22 | 0.25 | 1    | -0.034  | NA |
| chr6 | 35479872  | 35480154  | TULP1        | ENSG00000112041 | 38   | 0.26 | 0.27 | 1    | -0.0079 | NA |
| chr6 | 35744225  | 35744562  | C6orf126     | ENSG00000196748 | 22   | 0.33 | 0.44 | 1    | -0.11   | NA |
| chr6 | 36410433  | 36411139  | KCTD20       | ENSG00000112078 | 242  | 0.16 | 0.16 | 1    | 0.00057 | NA |
| chr6 | 37012609  | 37012884  | COX6A1P2     | ENSG00000226976 | 139  | 0.98 | 0.96 | 1    | 0.022   | NA |
| chr6 | 39082427  | 39083054  | C6orf64      | ENSG00000112167 | 107  | 0.16 | 0.14 | 1    | 0.015   | NA |
| chr6 | 41862841  | 41863335  | USP49        | ENSG00000164663 | 11   | 0.18 | 0.19 | 1    | -0.0028 | NA |
| chr6 | 42981408  | 42982077  | MEA1         | ENSG00000124733 | -36  | 0.2  | 0.19 | 1    | 0.0047  | NA |
| chr6 | 43021125  | 43021694  | CUL7         | ENSG00000044090 | 28   | 0.21 | 0.21 | 1    | 0.008   | NA |
| chr6 | 43422368  | 43423705  | DLK2         | ENSG00000171462 | 292  | 0.19 | 0.19 | 1    | 0.00057 | NA |

|      |           |           |               |                 |       |      |      |   |         |    |
|------|-----------|-----------|---------------|-----------------|-------|------|------|---|---------|----|
| chr6 | 44041014  | 44041468  | RP5-1120P11.3 | ENSG00000231881 | -409  | 0.18 | 0.19 | 1 | -0.0052 | NA |
| chr6 | 45387346  | 45388164  | RUNX2         | ENSG00000124813 | -1471 | 0.25 | 0.25 | 1 | 0.00087 | NA |
| chr6 | 46458878  | 46459257  | RCAN2         | ENSG00000172348 | 32    | 0.24 | 0.23 | 1 | 0.01    | NA |
| chr6 | 52284749  | 52285253  | EFHC1         | ENSG00000096093 | -105  | 0.17 | 0.17 | 1 | -0.0008 | NA |
| chr6 | 53659254  | 53660972  | LRRC1         | ENSG00000137269 | 818   | 0.21 | 0.21 | 1 | 0.0012  | NA |
| chr6 | 56112188  | 56112444  | COL21A1       | ENSG00000124749 | -81   | 0.14 | 0.25 | 1 | -0.11   | NA |
| chr6 | 56818873  | 56820308  | DST           | ENSG00000151914 | -205  | 0.19 | 0.19 | 1 | 0.0023  | NA |
| chr6 | 72129508  | 72130756  | C6orf155      | ENSG00000233237 | -326  | 0.2  | 0.2  | 1 | -0.0006 | NA |
| chr6 | 72294372  | 72294988  | RP11-263F15.1 | ENSG00000218014 | 256   | 1    | 1    | 1 | 0       | NA |
| chr6 | 73972819  | 73973027  | KHDC1         | ENSG00000135314 | -28   | 0.21 | 0.2  | 1 | 0.011   | NA |
| chr6 | 74073294  | 74073561  | C6orf221      | ENSG00000203908 | 1027  | 0.98 | 0.97 | 1 | 0.0028  | NA |
| chr6 | 74405600  | 74406021  | CD109         | ENSG00000156535 | -17   | 0.21 | 0.21 | 1 | 0.0053  | NA |
| chr6 | 79787608  | 79788337  | PHIP          | ENSG00000146247 | -19   | 0.16 | 0.16 | 1 | #####   | NA |
| chr6 | 83902606  | 83903777  | PGM3          | ENSG00000013375 | -241  | 0.18 | 0.18 | 1 | 0.0016  | NA |
| chr6 | 87647253  | 87647707  | HTR1E         | ENSG00000168830 | 70    | 0.23 | 0.22 | 1 | 0.0077  | NA |
| chr6 | 90596271  | 90596856  | RP11-63K6.5   | ENSG00000219240 | 688   | 0.95 | 1    | 1 | -0.05   | NA |
| chr6 | 96463869  | 96464136  | FUT9          | ENSG00000172461 | 142   | 0.2  | 0.21 | 1 | -0.014  | NA |
| chr6 | 100054686 | 100054988 | PRDM13        | ENSG00000112238 | 187   | 0.33 | 0.36 | 1 | -0.031  | NA |
| chr6 | 106534136 | 106534385 | PRDM1         | ENSG00000057657 | 65    | 1    | 0.86 | 1 | 0.14    | NA |
| chr6 | 106808487 | 106809171 | AIM1          | ENSG00000112297 | 45    | 0.24 | 0.25 | 1 | -0.0053 | NA |
| chr6 | 107349276 | 107349720 | C6orf203      | ENSG00000130349 | 91    | 0.21 | 0.22 | 1 | -0.011  | NA |
| chr6 | 108581716 | 108582669 | SNX3          | ENSG00000112335 | -24   | 0.22 | 0.22 | 1 | -0.0003 | NA |
| chr6 | 109330285 | 109331037 | SESN1         | ENSG00000080546 | 97    | 0.17 | 0.17 | 1 | -0.001  | NA |
| chr6 | 117002067 | 117002797 | KPNA5         | ENSG00000196911 | 82    | 0.2  | 0.14 | 1 | 0.057   | NA |
| chr6 | 122720607 | 122721366 | HSF2          | ENSG00000025156 | 295   | 0.22 | 0.24 | 1 | -0.011  | NA |
| chr6 | 126111537 | 126112480 | NCOA7         | ENSG00000111912 | 7     | 0.18 | 0.18 | 1 | -0.0019 | NA |
| chr6 | 126964603 | 126964988 | RP11-753G20.1 | ENSG00000217325 | 9     | 1    | 1    | 1 | 0       | NA |
| chr6 | 127441553 | 127441760 | AL356534.1    | ENSG00000248650 | -662  | 0.14 | 0.14 | 1 | 0.0074  | NA |
| chr6 | 127664192 | 127664755 | ECHDC1        | ENSG00000093144 | 18    | 0.23 | 0.23 | 1 | 0.0023  | NA |
| chr6 | 132833798 | 132834349 | STX7          | ENSG00000079950 | 128   | 0.21 | 0.21 | 1 | 0.0024  | NA |



|      |           |           |            |                 |      |      |      |    |         |    |
|------|-----------|-----------|------------|-----------------|------|------|------|----|---------|----|
| chr6 | 134497536 | 134497756 | SGK1       | ENSG00000118515 | -517 | 0.25 | 0.24 | 1  | 0.014   | NA |
| chr6 | 135375749 | 135376141 | HBS1L      | ENSG00000112339 | -7   | 0.25 | 0.26 | 1  | -0.013  | NA |
| chr6 | 142622583 | 142623453 | GPR126     | ENSG00000112414 | 27   | 0.24 | 0.24 | 1  | -0.0002 | NA |
| chr6 | 149777792 | 149778189 | ZC3H12D    | ENSG00000178199 | 15   | 0.97 | 0.98 | 1  | -0.0027 | NA |
| chr6 | 149969499 | 149969972 | KATNA1     | ENSG00000186625 | 94   | 0.2  | 0.2  | 1  | 0.0026  | NA |
| chr6 | 150389943 | 150390558 | ULBP3      | ENSG00000131019 | -48  | 0.29 | 0.29 | 1  | 0.0059  | NA |
| chr6 | 150920904 | 150922146 | PLEKHG1    | ENSG00000120278 | 526  | 0.19 | 0.19 | 1  | -0.0004 | NA |
| chr6 | 155539975 | 155540193 | TIAM2      | ENSG00000146426 | 1984 | 1    | 1    | 1  | 0       | NA |
| chr6 | 159239081 | 159240775 | EZR        | ENSG00000092820 | -669 | 0.19 | 0.19 | 1  | -0.0008 | NA |
| chr6 | 160679377 | 160679701 | SLC22A2    | ENSG00000112499 | 232  | 0.95 | 0.95 | 1  | -0.0023 | NA |
| chr6 | 170059237 | 170059586 | WDR27      | ENSG00000184465 | 1377 | 0.89 | 1    | 1  | -0.11   | NA |
| chr6 | 170862124 | 170862480 | PSMB1      | ENSG00000008018 | 115  | 0.4  | 0.4  | 1  | -0.0038 | NA |
| chr6 | 3140555   | 3140785   | BPHL       | ENSG00000137274 | 11   | 1    | NA   | NA | NA      | NA |
| chr6 | 3154104   | 3154746   | AL031963.1 | ENSG00000221162 | -453 | 1    | NA   | NA | NA      | NA |
| chr6 | 10415018  | 10415318  | TFAP2A     | ENSG00000137203 | 50   | 0.5  | NA   | NA | NA      | NA |
| chr6 | 24126309  | 24126512  | NRSN1      | ENSG00000152954 | 60   | NA   | 1    | NA | NA      | NA |
| chr6 | 26020671  | 26021125  | HIST1H3A   | ENSG00000198366 | 180  | 0.33 | NA   | NA | NA      | NA |
| chr6 | 26044203  | 26044469  | U91328.2   | ENSG00000234816 | 119  | 0.32 | NA   | NA | NA      | NA |
| chr6 | 26501725  | 26502107  | BTN1A1     | ENSG00000124557 | 421  | 0.44 | NA   | NA | NA      | NA |
| chr6 | 26863458  | 26863776  | AL133255.1 | ENSG00000197848 | -509 | 0.83 | NA   | NA | NA      | NA |
| chr6 | 27107138  | 27107394  | HIST1H4I   | ENSG00000198339 | 190  | 0.96 | NA   | NA | NA      | NA |
| chr6 | 27782247  | 27782485  | HIST1H2AJ  | ENSG00000182611 | 241  | 1    | NA   | NA | NA      | NA |
| chr6 | 27833120  | 27833406  | HIST1H2AL  | ENSG00000198374 | 229  | 0.34 | NA   | NA | NA      | NA |
| chr6 | 28226979  | 28227483  | ZKSCAN4    | ENSG00000187626 | -220 | 0.81 | NA   | NA | NA      | NA |
| chr6 | 29894140  | 29895117  | HLA-K      | ENSG00000230795 | 392  | NA   | 0.6  | NA | NA      | NA |
| chr6 | 29910202  | 29911367  | HLA-A      | ENSG00000206503 | 497  | NA   | 0.5  | NA | NA      | NA |
| chr6 | 29924201  | 29924533  | HLA-W      | ENSG00000235290 | -6   | NA   | 1    | NA | NA      | NA |
| chr6 | 31148369  | 31148577  | POU5F1     | ENSG00000204531 | 35   | 1    | NA   | NA | NA      | NA |
| chr6 | 31691425  | 31691718  | C6orf25    | ENSG00000204420 | 410  | 1    | NA   | NA | NA      | NA |
| chr6 | 32632158  | 32633027  | HLA-DQB1   | ENSG00000179344 | 1823 | 0.9  | NA   | NA | NA      | NA |

|      |           |           |              |                 |       |      |      |          |       |    |
|------|-----------|-----------|--------------|-----------------|-------|------|------|----------|-------|----|
| chr6 | 32729342  | 32729877  | HLA-DQB2     | ENSG00000232629 | 1634  | NA   | 1    | NA       | NA    | NA |
| chr6 | 34231093  | 34231502  | RPL35P2      | ENSG00000220583 | 153   | 1    | NA   | NA       | NA    | NA |
| chr6 | 36853590  | 36853927  | C6orf89      | ENSG00000198663 | 128   | NA   | 0.35 | NA       | NA    | NA |
| chr6 | 38670576  | 38670975  | GLO1         | ENSG00000124767 | 142   | NA   | 0.17 | NA       | NA    | NA |
| chr6 | 43276419  | 43276659  | CRIP3        | ENSG00000146215 | -13   | 0.9  | NA   | NA       | NA    | NA |
| chr6 | 62995855  | 62996228  | KHDRBS2      | ENSG00000112232 | 91    | 0.15 | NA   | NA       | NA    | NA |
| chr6 | 66011253  | 66011481  | RP11-74E24.2 | ENSG00000214558 | 13    | 0.88 | NA   | NA       | NA    | NA |
| chr6 | 69345216  | 69345483  | BAI3         | ENSG00000135298 | 90    | 0.25 | NA   | NA       | NA    | NA |
| chr6 | 82957625  | 82957842  | IBTK         | ENSG00000005700 | -262  | 0.2  | NA   | NA       | NA    | NA |
| chr6 | 96969511  | 96970100  | RP3-443E24.1 | ENSG00000233797 | -260  | 0.35 | NA   | NA       | NA    | NA |
| chr6 | 108615961 | 108616398 | LACE1        | ENSG00000135537 | 81    | 0.29 | NA   | NA       | NA    | NA |
| chr6 | 110501609 | 110501821 | CDC40        | ENSG00000168438 | 91    | 0.27 | NA   | NA       | NA    | NA |
| chr6 | 112575091 | 112575483 | LAMA4        | ENSG00000112769 | 400   | 1    | NA   | NA       | NA    | NA |
| chr6 | 121655615 | 121656022 | C6orf170     | ENSG00000146350 | -194  | 0.19 | NA   | NA       | NA    | NA |
| chr6 | 122792758 | 122793091 | SERINC1      | ENSG00000111897 | 28    | 0.27 | NA   | NA       | NA    | NA |
| chr6 | 133563701 | 133563905 | EYA4         | ENSG00000112319 | 1034  | 0.37 | NA   | NA       | NA    | NA |
| chr6 | 142468190 | 142468458 | VTA1         | ENSG00000009844 | -43   | 0.25 | NA   | NA       | NA    | NA |
| chr7 | 44185961  | 44186184  | GCK          | ENSG00000106633 | -329  | 0.23 | 0.62 | 1.30E-09 | -0.39 | NA |
| chr7 | 100075303 | 100075551 | TSC22D4      | ENSG00000166925 | -302  | 0.75 | 0.27 | 1.50E-09 | 0.48  | NA |
| chr7 | 75911818  | 75912496  | SRRM3        | ENSG00000177679 | 225   | 0.16 | 0.36 | 1.80E-09 | -0.19 | NA |
| chr7 | 116139774 | 116140352 | CAV2         | ENSG00000105971 | 269   | 0.46 | 0.19 | 6.60E-09 | 0.27  | NA |
| chr7 | 100284888 | 100285155 | GIGYF1       | ENSG00000146830 | -639  | 0.83 | 0.38 | 1.10E-08 | 0.46  | NA |
| chr7 | 156741472 | 156741899 | NOM1         | ENSG00000146909 | -732  | 0.68 | 0.43 | 4.80E-08 | 0.25  | NA |
| chr7 | 24323558  | 24325080  | NPY          | ENSG00000122585 | 537   | 0.38 | 0.18 | 5.70E-08 | 0.2   | NA |
| chr7 | 130417912 | 130419378 | KLF14        | ENSG00000174595 | 243   | 0.32 | 0.2  | 1.20E-07 | 0.12  | NA |
| chr7 | 22893794  | 22894577  | AC005682.5   | ENSG00000228649 | -1520 | 0.54 | 0.23 | 2.10E-07 | 0.31  | NA |
| chr7 | 27163819  | 27164098  | AC004080.12  | ENSG00000253552 | 1171  | 0.29 | 0.88 | 2.20E-07 | -0.6  | NA |
| chr7 | 65970022  | 65971421  | GS1-124K5.9  | ENSG00000179342 | 232   | 0.82 | 0.69 | 2.50E-07 | 0.12  | NA |
| chr7 | 8301031   | 8302252   | ICA1         | ENSG00000003147 | 41    | 0.28 | 0.16 | 3.20E-07 | 0.12  | NA |
| chr7 | 151038858 | 151039136 | NUB1         | ENSG00000013374 | 122   | 0.41 | 0.15 | 3.30E-07 | 0.26  | NA |

|      |           |           |               |                 |       |      |      |          |        |    |
|------|-----------|-----------|---------------|-----------------|-------|------|------|----------|--------|----|
| chr7 | 50849752  | 50850871  | GRB10         | ENSG00000106070 | -47   | 0.63 | 0.48 | 3.40E-07 | 0.15   | NA |
| chr7 | 98467023  | 98468058  | TMEM130       | ENSG00000166448 | -51   | 0.22 | 0.11 | 3.60E-07 | 0.11   | NA |
| chr7 | 73183379  | 73185115  | CLDN3         | ENSG00000165215 | 353   | 0.27 | 0.49 | 5.30E-07 | -0.22  | NA |
| chr7 | 158379328 | 158381221 | PTPRN2        | ENSG00000155093 | 97    | 0.3  | 0.18 | 6.20E-07 | 0.12   | NA |
| chr7 | 81240381  | 81240708  | AC010091.4    | ENSG00000230196 | 98    | 0.99 | 0.8  | 7.10E-07 | 0.19   | NA |
| chr7 | 155246390 | 155251955 | AC008060.8    | ENSG00000236544 | 622   | 0.45 | 0.36 | 7.10E-07 | 0.096  | NA |
| chr7 | 27231805  | 27233097  | RP1-170O19.14 | ENSG00000253508 | 616   | 0.35 | 0.18 | 1.00E-06 | 0.17   | NA |
| chr7 | 19184221  | 19184686  | AC003986.5    | ENSG00000229533 | 537   | 0.83 | 0.38 | 1.20E-06 | 0.45   | NA |
| chr7 | 128482286 | 128482977 | FLNC          | ENSG00000128591 | 1246  | 0.93 | 0.76 | 1.20E-06 | 0.16   | NA |
| chr7 | 84814839  | 84816242  | SEMA3D        | ENSG00000153993 | 631   | 0.18 | 0.33 | 1.60E-06 | -0.15  | NA |
| chr7 | 32535086  | 32535540  | AVL9          | ENSG00000105778 | 212   | 0.18 | 0.41 | 8.30E-06 | -0.24  | NA |
| chr7 | 91874781  | 91875851  | KRIT1         | ENSG00000001631 | -207  | 0.18 | 0.48 | 1.00E-05 | -0.3   | NA |
| chr7 | 2563610   | 2564056   | LFNG          | ENSG00000106003 | 606   | 0.41 | 0.11 | 1.80E-05 | 0.3    | NA |
| chr7 | 556611    | 562845    | PDGFA         | ENSG00000197461 | -1591 | 0.2  | 0.26 | 1.90E-05 | -0.058 | NA |
| chr7 | 1024021   | 1024233   | CYP2W1        | ENSG00000073067 | 1133  | 0.83 | 0.6  | 1.90E-05 | 0.23   | NA |
| chr7 | 19184818  | 19185033  | FERD3L        | ENSG00000146618 | 119   | 0.83 | 0.2  | 1.90E-05 | 0.63   | NA |
| chr7 | 43622682  | 43623392  | STK17A        | ENSG00000164543 | 373   | 0.17 | 0.32 | 2.00E-05 | -0.16  | NA |
| chr7 | 156735245 | 156735665 | RP5-1121A15.3 | ENSG00000230033 | -1960 | 0.3  | 0.55 | 2.10E-05 | -0.25  | NA |
| chr7 | 6209930   | 6210718   | CYTH3         | ENSG00000008256 | 266   | 0.89 | 0.75 | 2.70E-05 | 0.14   | NA |
| chr7 | 38217549  | 38218002  | STARD3NL      | ENSG00000010270 | -49   | 0.48 | 0.19 | 2.90E-05 | 0.29   | NA |
| chr7 | 63391462  | 63392174  | RP11-340I6.10 | ENSG00000213645 | 299   | 0.8  | 0.62 | 3.10E-05 | 0.17   | NA |
| chr7 | 111845860 | 111846887 | DOCK4         | ENSG00000128512 | 76    | 0.15 | 0.27 | 3.50E-05 | -0.12  | NA |
| chr7 | 35296921  | 35298218  | AC009531.2    | ENSG00000226063 | 1771  | 0.34 | 0.21 | 3.60E-05 | 0.13   | NA |
| chr7 | 150037459 | 150039031 | RARRES2       | ENSG00000106538 | 487   | 0.27 | 0.41 | 3.90E-05 | -0.14  | NA |
| chr7 | 123388399 | 123389623 | WASL          | ENSG00000106299 | 5     | 0.14 | 0.26 | 4.40E-05 | -0.12  | NA |
| chr7 | 1659040   | 1659765   | AC074389.5    | ENSG00000231476 | -888  | 0.94 | 0.85 | 5.80E-05 | 0.092  | NA |
| chr7 | 150068756 | 150070051 | RP4-584D14.5  | ENSG00000240449 | 276   | 0.95 | 0.9  | 6.10E-05 | 0.058  | NA |
| chr7 | 144532762 | 144533253 | TPK1          | ENSG00000196511 | 85    | 0.17 | 0.31 | 7.00E-05 | -0.14  | NA |
| chr7 | 30067762  | 30068600  | PLEKHA8       | ENSG00000106086 | 203   | 0.18 | 0.32 | 7.30E-05 | -0.14  | NA |
| chr7 | 27179062  | 27179511  | HOXA3         | ENSG00000105997 | 539   | 0.34 | 0.21 | 8.60E-05 | 0.14   | NA |

|      |           |           |               |                 |      |      |      |          |        |    |
|------|-----------|-----------|---------------|-----------------|------|------|------|----------|--------|----|
| chr7 | 150019950 | 150020752 | ACTR3C        | ENSG00000106526 | -99  | 0.35 | 0.22 | 8.60E-05 | 0.13   | NA |
| chr7 | 73021486  | 73021720  | MLXIPL        | ENSG00000009950 | -153 | 0.26 | 0.48 | 8.70E-05 | -0.23  | NA |
| chr7 | 75623357  | 75624164  | TMEM120A      | ENSG00000189077 | 114  | 0.18 | 0.33 | 8.80E-05 | -0.15  | NA |
| chr7 | 62574596  | 62575257  | RP11-196D18.4 | ENSG00000234312 | 257  | 0.86 | 0.7  | 1.00E-04 | 0.16   | NA |
| chr7 | 28995305  | 28998541  | AC005013.5    | ENSG00000228421 | 1057 | 0.31 | 0.24 | 0.00011  | 0.068  | NA |
| chr7 | 102920309 | 102921514 | DPY19L2P2     | ENSG00000170629 | -245 | 0.28 | 0.12 | 0.00011  | 0.16   | NA |
| chr7 | 2598550   | 2599203   | IQCE          | ENSG00000106012 | 244  | 0.2  | 0.34 | 0.00013  | -0.14  | NA |
| chr7 | 39772839  | 39773252  | NCRNA00265    | ENSG00000188185 | -186 | 0.19 | 0.42 | 0.00016  | -0.22  | NA |
| chr7 | 139024930 | 139026298 | LUC7L2        | ENSG00000146963 | 509  | 0.17 | 0.28 | 0.00016  | -0.11  | NA |
| chr7 | 70596228  | 70598382  | WBSCR17       | ENSG00000185274 | 150  | 0.18 | 0.26 | 0.00019  | -0.078 | NA |
| chr7 | 1026777   | 1027150   | CYP2W1        | ENSG00000073067 | 670  | 0.93 | 0.77 | 2.00E-04 | 0.15   | NA |
| chr7 | 127291647 | 127292551 | AC073934.6    | ENSG00000240790 | -33  | 0.18 | 0.3  | 0.00022  | -0.12  | NA |
| chr7 | 150715308 | 150716404 | ATG9B         | ENSG00000181652 | 32   | 0.12 | 0.43 | 0.00022  | -0.3   | NA |
| chr7 | 16685252  | 16686364  | ANKMY2        | ENSG00000106524 | -521 | 0.36 | 0.14 | 0.00023  | 0.22   | NA |
| chr7 | 150901550 | 150901978 | IQCA1P1       | ENSG00000183016 | 817  | 0.61 | 0.89 | 0.00024  | -0.28  | NA |
| chr7 | 26191794  | 26192757  | NFE2L3        | ENSG00000050344 | 415  | 0.28 | 0.18 | 0.00027  | 0.097  | NA |
| chr7 | 103629525 | 103630652 | RELN          | ENSG00000189056 | -125 | 0.28 | 0.47 | 0.00028  | -0.19  | NA |
| chr7 | 79082948  | 79083850  | AC004945.2    | ENSG00000234456 | 123  | 0.22 | 0.36 | 0.00032  | -0.13  | NA |
| chr7 | 117067403 | 117067666 | ASZ1          | ENSG00000154438 | 18   | 0.99 | 0.86 | 0.00033  | 0.13   | NA |
| chr7 | 148580495 | 148582061 | EZH2          | ENSG00000106462 | -677 | 0.19 | 0.29 | 0.00038  | -0.096 | NA |
| chr7 | 152372980 | 152373421 | XRCC2         | ENSG00000196584 | 50   | 0.13 | 0.4  | 0.00039  | -0.27  | NA |
| chr7 | 32337983  | 32338725  | PDE1C         | ENSG00000154678 | 587  | 0.17 | 0.31 | 0.00046  | -0.14  | NA |
| chr7 | 143207985 | 143208798 | OR10AC1P      | ENSG00000176510 | 332  | 0.8  | 0.61 | 0.00049  | 0.18   | NA |
| chr7 | 28220014  | 28220534  | AC005017.1    | ENSG00000234336 | 198  | 0.42 | 0.18 | 0.00055  | 0.24   | NA |
| chr7 | 129073722 | 129074700 | FAM40B        | ENSG00000128578 | -63  | 0.15 | 0.25 | 0.00057  | -0.1   | NA |
| chr7 | 102036470 | 102037017 | PRKRIP1       | ENSG00000128563 | -67  | 0.24 | 0.88 | 0.00058  | -0.63  | NA |
| chr7 | 51383311  | 51384938  | COBL          | ENSG00000106078 | 44   | 0.34 | 0.25 | 0.00071  | 0.098  | NA |
| chr7 | 959724    | 959959    | ADAP1         | ENSG00000105963 | 669  | 0.66 | 0.84 | 0.00075  | -0.18  | NA |
| chr7 | 63560419  | 63561064  | RP11-165H4.1  | ENSG00000224458 | 58   | 0.3  | 0.45 | 0.00082  | -0.15  | NA |
| chr7 | 141251013 | 141251472 | AGK           | ENSG00000006530 | 47   | 0.21 | 0.12 | 0.00085  | 0.09   | NA |

|      |           |           |               |                 |       |      |      |          |        |    |
|------|-----------|-----------|---------------|-----------------|-------|------|------|----------|--------|----|
| chr7 | 44184770  | 44185695  | GCK           | ENSG00000106633 | 496   | 0.48 | 0.73 | 9.00E-04 | -0.24  | NA |
| chr7 | 44152227  | 44152505  | AEBP1         | ENSG00000106624 | 1260  | 0.86 | 0.67 | 0.00093  | 0.19   | NA |
| chr7 | 148036494 | 148036848 | CNTNAP2       | ENSG00000174469 | 107   | 0.15 | 0.34 | 0.00094  | -0.19  | NA |
| chr7 | 17338252  | 17339101  | AHR           | ENSG00000106546 | 369   | 0.14 | 0.25 | 0.00095  | -0.11  | NA |
| chr7 | 45613386  | 45615504  | ADCY1         | ENSG00000164742 | 706   | 0.21 | 0.31 | 0.00097  | -0.1   | NA |
| chr7 | 1532994   | 1533552   | INTS1         | ENSG00000164880 | 230   | 0.78 | 0.93 | 0.00098  | -0.15  | NA |
| chr7 | 27283408  | 27283614  | RP1-170O19.16 | ENSG00000253405 | 67    | 0.23 | 0.41 | 0.001    | -0.18  | NA |
| chr7 | 151106244 | 151107808 | RP4-555L14.5  | ENSG00000243836 | 779   | 0.15 | 0.23 | 0.001    | -0.073 | NA |
| chr7 | 102984857 | 102985337 | DNAJC2        | ENSG00000105821 | -62   | 0.25 | 0.13 | 0.0013   | 0.13   | NA |
| chr7 | 143077469 | 143079169 | AC093673.5    | ENSG00000232533 | -731  | 0.18 | 0.26 | 0.0013   | -0.077 | NA |
| chr7 | 100086074 | 100086286 | C7orf51       | ENSG00000166924 | 1633  | 0.67 | 0.93 | 0.0016   | -0.27  | NA |
| chr7 | 5553168   | 5553517   | FBXL18        | ENSG00000155034 | 40    | 0.17 | 0.34 | 0.0018   | -0.18  | NA |
| chr7 | 50517627  | 50518668  | FIGNL1        | ENSG00000132436 | -359  | 0.48 | 0.27 | 0.0018   | 0.2    | NA |
| chr7 | 149156561 | 149158080 | ZNF777        | ENSG00000196453 | 894   | 0.17 | 0.25 | 0.0019   | -0.075 | NA |
| chr7 | 1097405   | 1097953   | GPR146        | ENSG00000164849 | 538   | 0.99 | 0.87 | 0.0021   | 0.12   | NA |
| chr7 | 960048    | 960351    | ADAP1         | ENSG00000105963 | 311   | 0.77 | 0.92 | 0.0023   | -0.16  | NA |
| chr7 | 100845050 | 100845726 | MOGAT3        | ENSG00000106384 | -1086 | 0.17 | 0.29 | 0.0023   | -0.12  | NA |
| chr7 | 128577818 | 128578756 | IRF5          | ENSG00000128604 | 296   | 0.27 | 0.19 | 0.0023   | 0.088  | NA |
| chr7 | 23625611  | 23626161  | CLK2P         | ENSG00000232553 | 270   | 0.97 | 0.9  | 0.0024   | 0.069  | NA |
| chr7 | 32930730  | 32931956  | KBTBD2        | ENSG00000170852 | -578  | 0.27 | 0.19 | 0.0025   | 0.082  | NA |
| chr7 | 156931422 | 156932075 | UBE3C         | ENSG00000009335 | 141   | 0.13 | 0.24 | 0.0026   | -0.11  | NA |
| chr7 | 106684813 | 106685765 | PRKAR2B       | ENSG00000005249 | 195   | 0.16 | 0.23 | 0.0027   | -0.076 | NA |
| chr7 | 2393628   | 2395174   | EIF3B         | ENSG00000106263 | 680   | 0.16 | 0.24 | 0.0028   | -0.081 | NA |
| chr7 | 26239418  | 26242062  | HNRNPA2B1     | ENSG00000122566 | -396  | 0.17 | 0.23 | 0.0028   | -0.059 | NA |
| chr7 | 107220344 | 107221075 | BCAP29        | ENSG00000075790 | 287   | 0.18 | 0.3  | 0.0029   | -0.12  | NA |
| chr7 | 75677041  | 75677767  | STYXL1        | ENSG00000127952 | -133  | 0.16 | 0.27 | 0.003    | -0.11  | NA |
| chr7 | 24796541  | 24797487  | DFNA5         | ENSG00000105928 | 80    | 0.24 | 0.12 | 0.0031   | 0.12   | NA |
| chr7 | 128049499 | 128050488 | IMPDH1        | ENSG00000106348 | -453  | 0.25 | 0.16 | 0.0031   | 0.094  | NA |
| chr7 | 158497157 | 158498011 | NCAPG2        | ENSG00000146918 | -127  | 0.1  | 0.18 | 0.0031   | -0.079 | NA |
| chr7 | 65446771  | 65447340  | GUSB          | ENSG00000169919 | -97   | 0.23 | 0.33 | 0.0033   | -0.1   | NA |

|      |           |           |                |                 |       |      |      |        |        |    |
|------|-----------|-----------|----------------|-----------------|-------|------|------|--------|--------|----|
| chr7 | 25164548  | 25165236  | CYCS           | ENSG00000172115 | -24   | 0.16 | 0.29 | 0.0034 | -0.13  | NA |
| chr7 | 70158760  | 70160687  | AUTS2          | ENSG00000158321 | -136  | 0.16 | 0.23 | 0.0034 | -0.064 | NA |
| chr7 | 94284858  | 94286527  | SGCE           | ENSG00000127990 | -282  | 0.4  | 0.28 | 0.0036 | 0.12   | NA |
| chr7 | 55639277  | 55640599  | VOPP1          | ENSG00000154978 | -377  | 0.27 | 0.15 | 0.004  | 0.12   | NA |
| chr7 | 105172468 | 105172821 | RINT1          | ENSG00000135249 | 112   | 0.4  | 0.18 | 0.004  | 0.22   | NA |
| chr7 | 44084106  | 44084747  | DBNL           | ENSG00000136279 | 194   | 0.24 | 0.12 | 0.0042 | 0.12   | NA |
| chr7 | 100270875 | 100274003 | GNB2           | ENSG00000172354 | 1285  | 0.28 | 0.2  | 0.0042 | 0.08   | NA |
| chr7 | 92462201  | 92466387  | CDK6           | ENSG00000105810 | -1063 | 0.21 | 0.28 | 0.0044 | -0.069 | NA |
| chr7 | 75156588  | 75157524  | PMS2P3         | ENSG00000127957 | -147  | 0.23 | 0.14 | 0.0046 | 0.087  | NA |
| chr7 | 99933238  | 99934087  | PILRB          | ENSG00000121716 | -40   | 0.32 | 0.59 | 0.0047 | -0.27  | NA |
| chr7 | 63642039  | 63643802  | RP11-165H4.3   | ENSG00000213644 | 832   | 0.34 | 0.4  | 0.0048 | -0.064 | NA |
| chr7 | 27135342  | 27136736  | HOXA1          | ENSG00000105991 | -446  | 0.22 | 0.32 | 0.0052 | -0.095 | NA |
| chr7 | 57270847  | 57271464  | RP11-1217F2.14 | ENSG00000169325 | 149   | 0.63 | 0.8  | 0.0052 | -0.17  | NA |
| chr7 | 87563342  | 87564571  | ADAM22         | ENSG00000008277 | 498   | 0.27 | 0.19 | 0.0054 | 0.087  | NA |
| chr7 | 1026167   | 1026395   | CYP2W1         | ENSG00000073067 | -12   | 0.88 | 0.7  | 0.0057 | 0.18   | NA |
| chr7 | 8473139   | 8475199   | NXPH1          | ENSG00000122584 | 584   | 0.24 | 0.17 | 0.0058 | 0.069  | NA |
| chr7 | 131012460 | 131013190 | AC018642.1     | ENSG00000236753 | -349  | 0.15 | 0.23 | 0.0064 | -0.082 | NA |
| chr7 | 2742273   | 2742546   | AMZ1           | ENSG00000174945 | 245   | 0.88 | 1    | 0.0066 | -0.12  | NA |
| chr7 | 129780474 | 129781597 | RP11-775D22.2  | ENSG00000229196 | -536  | 0.8  | 0.71 | 0.007  | 0.083  | NA |
| chr7 | 77427331  | 77428850  | TMEM60         | ENSG00000135211 | -193  | 0.23 | 0.16 | 0.0071 | 0.065  | NA |
| chr7 | 57484168  | 57485070  | RP11-114G11.2  | ENSG00000235368 | 412   | 0.68 | 0.6  | 0.0075 | 0.083  | NA |
| chr7 | 2739968   | 2740417   | AMZ1           | ENSG00000174945 | -1463 | 0.92 | 0.99 | 0.0083 | -0.069 | NA |
| chr7 | 127227758 | 127229039 | ARF5           | ENSG00000004059 | -1    | 0.17 | 0.25 | 0.0091 | -0.082 | NA |
| chr7 | 2353629   | 2354075   | SNX8           | ENSG00000106266 | 224   | 0.11 | 0.21 | 0.0092 | -0.1   | NA |
| chr7 | 27190274  | 27191115  | HOXA6          | ENSG00000106006 | -472  | 0.31 | 0.18 | 0.0092 | 0.13   | NA |
| chr7 | 150777607 | 150780879 | FASTK          | ENSG00000164896 | -1366 | 0.27 | 0.22 | 0.0093 | 0.055  | NA |
| chr7 | 76256088  | 76256838  | POMZP3         | ENSG00000146707 | 94    | 0.58 | 0.15 | 0.0094 | 0.43   | NA |
| chr7 | 127880750 | 127881375 | LEP            | ENSG00000174697 | -275  | 0.51 | 0.42 | 0.0096 | 0.095  | NA |
| chr7 | 140714478 | 140714943 | MRPS33         | ENSG00000090263 | -231  | 0.1  | 0.27 | 0.0097 | -0.16  | NA |
| chr7 | 5632335   | 5634555   | FSCN1          | ENSG00000075618 | 1006  | 0.16 | 0.22 | 0.01   | -0.06  | NA |

|      |           |           |               |                 |      |      |      |       |        |    |
|------|-----------|-----------|---------------|-----------------|------|------|------|-------|--------|----|
| chr7 | 30174230  | 30176169  | C7orf41       | ENSG00000180354 | 773  | 0.19 | 0.25 | 0.01  | -0.065 | NA |
| chr7 | 43965806  | 43966400  | URGCP         | ENSG00000106608 | -166 | 0.21 | 0.36 | 0.01  | -0.15  | NA |
| chr7 | 102004220 | 102005167 | PRKRIP1       | ENSG00000128563 | 374  | 0.17 | 0.11 | 0.01  | 0.064  | NA |
| chr7 | 107531480 | 107531983 | DLD           | ENSG00000091140 | 124  | 0.3  | 0.17 | 0.01  | 0.13   | NA |
| chr7 | 33168674  | 33169243  | AC074338.5    | ENSG00000228015 | -203 | 0.22 | 0.57 | 0.011 | -0.35  | NA |
| chr7 | 98923235  | 98923975  | ARPC1A        | ENSG00000241685 | 84   | 0.18 | 0.12 | 0.011 | 0.061  | NA |
| chr7 | 150942304 | 150943033 | SMARCD3       | ENSG00000082014 | -69  | 0.21 | 0.12 | 0.011 | 0.096  | NA |
| chr7 | 75831068  | 75831542  | SRRM3         | ENSG00000177679 | 89   | 0.22 | 1    | 0.012 | -0.78  | NA |
| chr7 | 154001964 | 154002281 | DPP6          | ENSG00000130226 | -73  | 0.16 | 0.42 | 0.012 | -0.26  | NA |
| chr7 | 4721637   | 4722779   | FO XK1        | ENSG00000164916 | 278  | 0.28 | 0.19 | 0.013 | 0.087  | NA |
| chr7 | 44613211  | 44613875  | DDX56         | ENSG00000136271 | -280 | 0.22 | 0.34 | 0.013 | -0.12  | NA |
| chr7 | 128766335 | 128767982 | RP11-286H14.4 | ENSG00000230626 | 586  | 0.83 | 0.74 | 0.013 | 0.087  | NA |
| chr7 | 129425486 | 129425859 | RP11-738B7.1  | ENSG00000242078 | -647 | 0.34 | 0.17 | 0.013 | 0.17   | NA |
| chr7 | 130353070 | 130353979 | COPG2         | ENSG00000158623 | 39   | 0.15 | 0.24 | 0.013 | -0.084 | NA |
| chr7 | 155436673 | 155437817 | AC009403.2    | ENSG00000216895 | -174 | 0.14 | 0.19 | 0.013 | -0.048 | NA |
| chr7 | 2583206   | 2583542   | BRAT1         | ENSG00000106009 | 512  | 0.73 | 0.97 | 0.014 | -0.24  | NA |
| chr7 | 155174128 | 155175248 | AC008060.7    | ENSG00000218672 | -83  | 0.53 | 0.39 | 0.014 | 0.14   | NA |
| chr7 | 56119045  | 56119963  | PSPH          | ENSG00000146733 | -419 | 0.16 | 0.23 | 0.015 | -0.073 | NA |
| chr7 | 64973420  | 64974994  | RP11-328P23.3 | ENSG00000226767 | -350 | 1    | 0.52 | 0.015 | 0.48   | NA |
| chr7 | 100449772 | 100450617 | RP11-126L15.4 | ENSG00000236305 | 44   | 0.16 | 0.23 | 0.015 | -0.073 | NA |
| chr7 | 6098449   | 6098982   | EIF2AK1       | ENSG00000086232 | -28  | 0.25 | 0.39 | 0.016 | -0.14  | NA |
| chr7 | 1066931   | 1068245   | C7orf50       | ENSG00000146540 | 387  | 0.28 | 0.21 | 0.017 | 0.068  | NA |
| chr7 | 45960137  | 45961347  | IGFBP3        | ENSG00000146674 | -276 | 0.19 | 0.25 | 0.017 | -0.062 | NA |
| chr7 | 150870831 | 150872036 | GBX1          | ENSG00000164900 | 399  | 0.87 | 0.81 | 0.017 | 0.061  | NA |
| chr7 | 35292985  | 35294674  | TBX20         | ENSG00000164532 | -587 | 0.24 | 0.17 | 0.018 | 0.072  | NA |
| chr7 | 62514515  | 62514983  | RP11-196D18.1 | ENSG00000227148 | 60   | 0.62 | 0.5  | 0.018 | 0.12   | NA |
| chr7 | 107301205 | 107302416 | SLC26A4       | ENSG00000091137 | 361  | 0.42 | 0.27 | 0.018 | 0.15   | NA |
| chr7 | 50132572  | 50132921  | ZBPB          | ENSG00000042813 | 82   | 0.53 | 0.41 | 0.019 | 0.13   | NA |
| chr7 | 100424424 | 100425626 | SLC12A9       | ENSG00000146828 | 583  | 0.14 | 0.21 | 0.019 | -0.064 | NA |
| chr7 | 48494361  | 48494753  | ABCA13        | ENSG00000179869 | -103 | 0.98 | 0.8  | 0.02  | 0.18   | NA |

|      |           |           |               |                 |       |      |      |       |        |    |
|------|-----------|-----------|---------------|-----------------|-------|------|------|-------|--------|----|
| chr7 | 150783076 | 150783293 | AGAP3         | ENSG00000133612 | 230   | 0.3  | 0.12 | 0.023 | 0.18   | NA |
| chr7 | 6441809   | 6442042   | RAC1          | ENSG00000136238 | 676   | 0.73 | 0.43 | 0.024 | 0.3    | NA |
| chr7 | 44240418  | 44240729  | YKT6          | ENSG00000106636 | 6     | 0.73 | 0.29 | 0.024 | 0.44   | NA |
| chr7 | 1587240   | 1587693   | AC093734.13   | ENSG00000241181 | -1581 | 0.84 | 0.94 | 0.025 | -0.095 | NA |
| chr7 | 6654745   | 6655860   | AC073343.8    | ENSG00000236609 | 54    | 0.16 | 0.22 | 0.025 | -0.056 | NA |
| chr7 | 105223524 | 105223850 | RP11-251G23.3 | ENSG00000231167 | 16    | 0.89 | 0.79 | 0.025 | 0.098  | NA |
| chr7 | 142985047 | 142985810 | CASP2         | ENSG00000106144 | 120   | 0.19 | 0.3  | 0.025 | -0.12  | NA |
| chr7 | 115850370 | 115851028 | TES           | ENSG00000135269 | 152   | 0.16 | 0.25 | 0.026 | -0.087 | NA |
| chr7 | 5013508   | 5014436   | RNF216L       | ENSG00000196204 | 353   | 0.18 | 0.11 | 0.027 | 0.064  | NA |
| chr7 | 93519366  | 93520184  | TFPI2         | ENSG00000105825 | -293  | 0.22 | 0.32 | 0.027 | -0.1   | NA |
| chr7 | 105161982 | 105162889 | PUS7          | ENSG00000091127 | 250   | 0.19 | 0.11 | 0.027 | 0.08   | NA |
| chr7 | 56019371  | 56019979  | GBAS          | ENSG00000146729 | 189   | 0.26 | 0.1  | 0.029 | 0.16   | NA |
| chr7 | 64349424  | 64350151  | RP11-797H7.5  | ENSG00000189316 | 691   | 0.35 | 0.27 | 0.029 | 0.079  | NA |
| chr7 | 129142171 | 129143038 | RP11-305M3.3  | ENSG00000240204 | 284   | 0.17 | 0.23 | 0.029 | -0.063 | NA |
| chr7 | 97601307  | 97601813  | AC004967.7    | ENSG00000243554 | 6     | 0.13 | 0.23 | 0.03  | -0.1   | NA |
| chr7 | 99869003  | 99870085  | AC005071.4    | ENSG00000239521 | 62    | 0.18 | 0.26 | 0.031 | -0.088 | NA |
| chr7 | 124404700 | 124406189 | GPR37         | ENSG00000170775 | 237   | 0.16 | 0.23 | 0.031 | -0.067 | NA |
| chr7 | 104941752 | 104941978 | RWDD4P1       | ENSG00000244490 | -104  | 0.99 | 0.95 | 0.032 | 0.044  | NA |
| chr7 | 25990012  | 25991320  | MIR148A       | ENSG00000199085 | -1060 | 0.16 | 0.23 | 0.034 | -0.061 | NA |
| chr7 | 100224270 | 100224558 | TFR2          | ENSG00000106327 | 813   | 0.34 | 1    | 0.034 | -0.66  | NA |
| chr7 | 45128417  | 45128780  | NACAD         | ENSG00000136274 | -85   | 0.27 | 0.14 | 0.035 | 0.13   | NA |
| chr7 | 150817005 | 150817237 | AGAP3         | ENSG00000133612 | 18    | 0.96 | 0.83 | 0.035 | 0.13   | NA |
| chr7 | 105752103 | 105753148 | SYPL1         | ENSG00000008282 | 42    | 0.18 | 0.13 | 0.036 | 0.046  | NA |
| chr7 | 156432433 | 156433670 | RNF32         | ENSG00000105982 | 76    | 0.34 | 0.28 | 0.036 | 0.06   | NA |
| chr7 | 12250720  | 12251214  | TMEM106B      | ENSG00000106460 | 100   | 0.18 | 0.24 | 0.037 | -0.068 | NA |
| chr7 | 149321187 | 149322234 | ZNF767        | ENSG00000133624 | -54   | 0.17 | 0.23 | 0.038 | -0.059 | NA |
| chr7 | 4922707   | 4923576   | RADIL         | ENSG00000157927 | 144   | 0.17 | 0.23 | 0.04  | -0.058 | NA |
| chr7 | 44364432  | 44365328  | CAMK2B        | ENSG00000058404 | -91   | 0.16 | 0.25 | 0.04  | -0.088 | NA |
| chr7 | 44835726  | 44836798  | PPIA          | ENSG00000196262 | -17   | 0.21 | 0.28 | 0.042 | -0.079 | NA |
| chr7 | 121783946 | 121784663 | AASS          | ENSG00000008311 | 5     | 0.16 | 0.23 | 0.042 | -0.064 | NA |



|      |           |           |             |                 |      |      |      |       |        |    |
|------|-----------|-----------|-------------|-----------------|------|------|------|-------|--------|----|
| chr7 | 124569882 | 124570199 | RP11-3B12.1 | ENSG00000224897 | 113  | 0.14 | 0.5  | 0.042 | -0.36  | NA |
| chr7 | 148958858 | 148959891 | ZNF783      | ENSG00000204946 | 112  | 0.16 | 0.21 | 0.042 | -0.051 | NA |
| chr7 | 2727682   | 2728392   | AMZ1        | ENSG00000174945 | 201  | 0.22 | 0.17 | 0.043 | 0.057  | NA |
| chr7 | 28448716  | 28450028  | CREB5       | ENSG00000146592 | 418  | 0.18 | 0.14 | 0.043 | 0.04   | NA |
| chr7 | 153748407 | 153750444 | DPP6        | ENSG00000130226 | -78  | 0.19 | 0.26 | 0.043 | -0.069 | NA |
| chr7 | 42267546  | 42267823  | GLI3        | ENSG00000106571 | -364 | 0.46 | 0.27 | 0.044 | 0.19   | NA |
| chr7 | 32801484  | 32801972  | AC018633.4  | ENSG00000229358 | -329 | 0.9  | 0.33 | 0.045 | 0.56   | NA |
| chr7 | 121513046 | 121513911 | PTPRZ1      | ENSG00000106278 | 335  | 0.22 | 0.16 | 0.045 | 0.061  | NA |
| chr7 | 6144970   | 6145319   | USP42       | ENSG00000106346 | 491  | 0.31 | 0.13 | 0.046 | 0.18   | NA |
| chr7 | 76090885  | 76091495  | AC005522.1  | ENSG00000091073 | 197  | 0.36 | 0.1  | 0.046 | 0.26   | NA |
| chr7 | 98741205  | 98741990  | SMURF1      | ENSG00000198742 | 45   | 0.19 | 0.26 | 0.046 | -0.073 | NA |
| chr7 | 145813030 | 145814084 | CNTNAP2     | ENSG00000174469 | 104  | 0.17 | 0.26 | 0.046 | -0.082 | NA |
| chr7 | 150065169 | 150066351 | REPIN1      | ENSG00000214022 | 482  | 0.24 | 0.19 | 0.046 | 0.055  | NA |
| chr7 | 2594724   | 2595538   | BRAT1       | ENSG00000106009 | 197  | 0.16 | 0.22 | 0.047 | -0.058 | NA |
| chr7 | 26415746  | 26416891  | AC004540.4  | ENSG00000225792 | -426 | 0.13 | 0.19 | 0.047 | -0.064 | NA |
| chr7 | 73498098  | 73498697  | LIMK1       | ENSG00000106683 | 290  | 0.21 | 0.31 | 0.047 | -0.098 | NA |
| chr7 | 943565    | 943892    | ADAP1       | ENSG00000105963 | 181  | 0.85 | 0.94 | 0.048 | -0.091 | NA |
| chr7 | 1784027   | 1786934   | AC074389.8  | ENSG00000225968 | 1247 | 0.98 | 0.96 | 0.048 | 0.015  | NA |
| chr7 | 23636735  | 23637557  | CCDC126     | ENSG00000169193 | 148  | 0.24 | 0.17 | 0.048 | 0.073  | NA |
| chr7 | 27153187  | 27153647  | HOXA3       | ENSG00000105997 | 47   | 0.21 | 0.3  | 0.048 | -0.09  | NA |
| chr7 | 116593880 | 116594325 | ST7OT4      | ENSG00000214188 | 149  | 0.29 | 0.21 | 0.048 | 0.081  | NA |
| chr7 | 158936507 | 158938492 | VIPR2       | ENSG00000106018 | -52  | 0.15 | 0.19 | 0.048 | -0.043 | NA |
| chr7 | 66093348  | 66094174  | KCTD7       | ENSG00000243335 | -107 | 0.14 | 0.2  | 0.049 | -0.062 | NA |
| chr7 | 89747892  | 89749036  | DPY19L2P4   | ENSG00000235436 | -250 | 0.18 | 0.26 | 0.05  | -0.082 | NA |
| chr7 | 112090122 | 112091412 | IFRD1       | ENSG00000006652 | 586  | 0.17 | 0.23 | 0.05  | -0.06  | NA |
| chr7 | 116962841 | 116964803 | WNT2        | ENSG00000105989 | -727 | 0.17 | 0.24 | 0.05  | -0.066 | NA |
| chr7 | 140396414 | 140397357 | NDUFB2      | ENSG00000090266 | 414  | 0.2  | 0.26 | 0.05  | -0.062 | NA |
| chr7 | 150675206 | 150675866 | KCNH2       | ENSG00000055118 | -312 | 0.29 | 0.2  | 0.05  | 0.093  | NA |
| chr7 | 65669965  | 65670945  | TPST1       | ENSG00000169902 | 269  | 0.14 | 0.2  | 0.052 | -0.061 | NA |
| chr7 | 1584054   | 1584345   | AC093734.14 | ENSG00000241340 | 1216 | 0.9  | 0.96 | 0.053 | -0.062 | NA |

|      |           |           |               |                 |       |      |      |       |        |    |
|------|-----------|-----------|---------------|-----------------|-------|------|------|-------|--------|----|
| chr7 | 30543984  | 30545005  | GGCT          | ENSG00000006625 | -79   | 0.28 | 0.17 | 0.053 | 0.11   | NA |
| chr7 | 99678768  | 99679702  | ZNF3          | ENSG00000166526 | 91    | 0.22 | 0.15 | 0.053 | 0.066  | NA |
| chr7 | 102256802 | 102257489 | RASA4         | ENSG00000105808 | -6    | 0.15 | 0.09 | 0.053 | 0.058  | NA |
| chr7 | 156742285 | 156743074 | NOM1          | ENSG00000146909 | 262   | 0.19 | 0.24 | 0.053 | -0.051 | NA |
| chr7 | 128828333 | 128829366 | SMO           | ENSG00000128602 | 136   | 0.14 | 0.18 | 0.056 | -0.042 | NA |
| chr7 | 156400018 | 156400712 | RP5-982E9.1   | ENSG00000241558 | -1904 | 0.47 | 0.4  | 0.056 | 0.074  | NA |
| chr7 | 157129089 | 157130306 | DNAJB6        | ENSG00000105993 | 37    | 0.18 | 0.25 | 0.057 | -0.068 | NA |
| chr7 | 25021013  | 25021520  | OSBPL3        | ENSG00000070882 | -13   | 0.34 | 0.15 | 0.058 | 0.19   | NA |
| chr7 | 35840132  | 35841591  | AC007551.3    | ENSG00000228878 | -663  | 0.16 | 0.21 | 0.058 | -0.046 | NA |
| chr7 | 100421295 | 100421515 | EPHB4         | ENSG00000196411 | 1743  | 0.66 | 0.83 | 0.058 | -0.18  | NA |
| chr7 | 73118500  | 73118749  | STX1A         | ENSG00000106089 | -103  | 0.98 | 0.83 | 0.059 | 0.15   | NA |
| chr7 | 73152564  | 73153716  | ABHD11        | ENSG00000106077 | -427  | 0.22 | 0.16 | 0.059 | 0.068  | NA |
| chr7 | 21985071  | 21985842  | CDCA7L        | ENSG00000164649 | 40    | 0.21 | 0.15 | 0.06  | 0.064  | NA |
| chr7 | 77325410  | 77326409  | AC090421.1    | ENSG00000214293 | -339  | 0.15 | 0.22 | 0.06  | -0.074 | NA |
| chr7 | 100732088 | 100732424 | TRIM56        | ENSG00000169871 | -636  | 0.99 | 0.94 | 0.06  | 0.053  | NA |
| chr7 | 156802170 | 156804414 | MNX1          | ENSG00000130675 | -901  | 0.21 | 0.17 | 0.06  | 0.038  | NA |
| chr7 | 72726824  | 72727440  | RP11-483G21.3 | ENSG00000225005 | -975  | 0.9  | 0.96 | 0.063 | -0.056 | NA |
| chr7 | 130130739 | 130133111 | MEST-IT1      | ENSG00000246011 | -912  | 0.41 | 0.46 | 0.065 | -0.044 | NA |
| chr7 | 100806279 | 100809064 | VGFB          | ENSG00000128564 | 724   | 0.17 | 0.2  | 0.066 | -0.03  | NA |
| chr7 | 2968234   | 2968596   | CARD11        | ENSG00000198286 | 1279  | 0.41 | 0.32 | 0.068 | 0.086  | NA |
| chr7 | 148991655 | 148992181 | RP4-800G7.2   | ENSG00000244560 | 738   | 0.93 | 0.98 | 0.068 | -0.052 | NA |
| chr7 | 993401    | 994574    | ADAP1         | ENSG00000105963 | 346   | 0.24 | 0.3  | 0.069 | -0.068 | NA |
| chr7 | 6974757   | 6974963   | RP11-740N7.6  | ENSG00000242731 | 1329  | 0.87 | 0.98 | 0.069 | -0.11  | NA |
| chr7 | 2671156   | 2671937   | TTYH3         | ENSG00000136295 | -39   | 0.21 | 0.3  | 0.071 | -0.089 | NA |
| chr7 | 121035820 | 121036670 | FAM3C         | ENSG00000196937 | 115   | 0.18 | 0.13 | 0.071 | 0.046  | NA |
| chr7 | 99724482  | 99725808  | RP11-506M12.1 | ENSG00000242798 | -383  | 0.16 | 0.22 | 0.072 | -0.053 | NA |
| chr7 | 100463758 | 100464146 | TRIP6         | ENSG00000087077 | -808  | 0.17 | 0.27 | 0.072 | -0.1   | NA |
| chr7 | 88388488  | 88389283  | ZNF804B       | ENSG00000182348 | 203   | 0.29 | 0.43 | 0.073 | -0.14  | NA |
| chr7 | 101457382 | 101461030 | CUX1          | ENSG00000160967 | -34   | 0.2  | 0.17 | 0.073 | 0.024  | NA |
| chr7 | 156801418 | 156801632 | MNX1          | ENSG00000130675 | 244   | 0.42 | 0.59 | 0.074 | -0.16  | NA |

|      |           |           |               |                 |       |      |      |       |        |    |
|------|-----------|-----------|---------------|-----------------|-------|------|------|-------|--------|----|
| chr7 | 38350920  | 38351331  | AC006033.22   | ENSG00000231916 | 141   | 0.27 | 0.45 | 0.075 | -0.18  | NA |
| chr7 | 54826581  | 54827188  | SEC61G        | ENSG00000132432 | -9    | 0.18 | 0.12 | 0.076 | 0.065  | NA |
| chr7 | 95064073  | 95064409  | PON2          | ENSG00000105854 | 20    | 0.09 | 0.27 | 0.076 | -0.18  | NA |
| chr7 | 132766509 | 132767096 | CHCHD3        | ENSG00000106554 | -2    | 0.2  | 0.29 | 0.076 | -0.081 | NA |
| chr7 | 54612324  | 54612558  | VSTM2A        | ENSG00000170419 | -1413 | 0.41 | 0.16 | 0.078 | 0.25   | NA |
| chr7 | 134671119 | 134671750 | AGBL3         | ENSG00000146856 | 175   | 0.14 | 0.2  | 0.078 | -0.06  | NA |
| chr7 | 74306265  | 74307187  | STAG3L2       | ENSG00000160828 | -234  | 0.12 | 0.22 | 0.079 | -0.098 | NA |
| chr7 | 90893567  | 90896683  | FZD1          | ENSG00000157240 | 1342  | 0.21 | 0.26 | 0.079 | -0.044 | NA |
| chr7 | 44079717  | 44080568  | AC017116.8    | ENSG00000235314 | 1020  | 0.21 | 0.12 | 0.08  | 0.086  | NA |
| chr7 | 108095401 | 108097206 | NRCAM         | ENSG00000091129 | 462   | 0.17 | 0.2  | 0.08  | -0.036 | NA |
| chr7 | 100025804 | 100028002 | ZCWPW1        | ENSG00000078487 | -616  | 0.24 | 0.19 | 0.081 | 0.054  | NA |
| chr7 | 6769321   | 6770216   | PMS2CL        | ENSG00000187953 | 356   | 0.2  | 0.27 | 0.082 | -0.061 | NA |
| chr7 | 45039171  | 45040257  | CCM2          | ENSG00000136280 | -70   | 0.33 | 0.54 | 0.082 | -0.21  | NA |
| chr7 | 65958470  | 65959121  | GS1-124K5.3   | ENSG00000223473 | -270  | 0.14 | 0.26 | 0.083 | -0.11  | NA |
| chr7 | 1609568   | 1610037   | PSMG3         | ENSG00000157778 | -173  | 0.12 | 0.17 | 0.084 | -0.052 | NA |
| chr7 | 23052971  | 23054002  | FAM126A       | ENSG00000122591 | 207   | 0.26 | 0.2  | 0.084 | 0.065  | NA |
| chr7 | 101943785 | 101944557 | SH2B2         | ENSG00000160999 | 336   | 0.95 | 0.91 | 0.084 | 0.036  | NA |
| chr7 | 134896014 | 134896664 | WDR91         | ENSG00000105875 | -53   | 0.21 | 0.29 | 0.085 | -0.076 | NA |
| chr7 | 117854128 | 117854721 | ANKRD7        | ENSG00000106013 | -303  | 0.27 | 0.39 | 0.086 | -0.12  | NA |
| chr7 | 112579633 | 112580217 | C7orf60       | ENSG00000164603 | -252  | 0.24 | 0.42 | 0.087 | -0.18  | NA |
| chr7 | 20370003  | 20371504  | ITGB8         | ENSG00000105855 | 428   | 0.24 | 0.19 | 0.089 | 0.055  | NA |
| chr7 | 72299836  | 72300419  | SBDSP1        | ENSG00000225648 | 123   | 0.16 | 0.26 | 0.089 | -0.1   | NA |
| chr7 | 100318106 | 100318684 | EPO           | ENSG00000130427 | -28   | 0.15 | 0.2  | 0.089 | -0.051 | NA |
| chr7 | 156795355 | 156799394 | RP5-1121A15.4 | ENSG00000235029 | -1627 | 0.28 | 0.25 | 0.093 | 0.035  | NA |
| chr7 | 75071482  | 75072262  | POM121C       | ENSG00000135213 | 121   | 0.18 | 0.09 | 0.095 | 0.089  | NA |
| chr7 | 1512939   | 1513216   | INTS1         | ENSG00000164880 | -291  | 0.89 | 0.96 | 0.096 | -0.07  | NA |
| chr7 | 1198965   | 1200144   | AC091729.9    | ENSG00000229043 | -108  | 0.24 | 0.2  | 0.097 | 0.042  | NA |
| chr7 | 72395367  | 72396135  | POM121        | ENSG00000196313 | 91    | 0.21 | 0.15 | 0.097 | 0.056  | NA |
| chr7 | 2442792   | 2444011   | CHST12        | ENSG00000136213 | 178   | 0.18 | 0.23 | 0.099 | -0.045 | NA |
| chr7 | 4855990   | 4856212   | RADIL         | ENSG00000157927 | -1137 | 0.88 | 1    | 0.099 | -0.12  | NA |

|      |           |           |              |                 |       |      |      |      |        |    |
|------|-----------|-----------|--------------|-----------------|-------|------|------|------|--------|----|
| chr7 | 6010075   | 6010408   | RSPH10B      | ENSG00000155026 | 22    | 0.08 | 0.27 | 0.1  | -0.18  | NA |
| chr7 | 10979991  | 10980279  | NDUFA4       | ENSG00000189043 | -252  | 0.28 | 0.16 | 0.1  | 0.12   | NA |
| chr7 | 98608993  | 98609222  | AC004893.11  | ENSG00000242687 | -1681 | 0.96 | 1    | 0.1  | -0.035 | NA |
| chr7 | 98971649  | 98973170  | ARPC1B       | ENSG00000130429 | 537   | 0.31 | 0.27 | 0.1  | 0.044  | NA |
| chr7 | 130790358 | 130792773 | AC058791.2   | ENSG00000231721 | 224   | 0.21 | 0.18 | 0.1  | 0.033  | NA |
| chr7 | 644181    | 644461    | AC147651.4   | ENSG00000237181 | 1499  | 0.96 | 0.82 | 0.11 | 0.14   | NA |
| chr7 | 2272010   | 2272856   | MAD1L1       | ENSG00000002822 | 147   | 0.15 | 0.2  | 0.11 | -0.047 | NA |
| chr7 | 16793188  | 16794100  | TSPAN13      | ENSG00000106537 | 484   | 0.2  | 0.14 | 0.11 | 0.062  | NA |
| chr7 | 26903869  | 26904753  | SKAP2        | ENSG00000005020 | -107  | 0.23 | 0.15 | 0.11 | 0.074  | NA |
| chr7 | 32981938  | 32982865  | RP9P         | ENSG00000205763 | 174   | 0.18 | 0.24 | 0.11 | -0.061 | NA |
| chr7 | 66386044  | 66386809  | C7orf42      | ENSG00000106609 | 214   | 0.23 | 0.18 | 0.11 | 0.051  | NA |
| chr7 | 98245805  | 98247759  | NPTX2        | ENSG00000106236 | 173   | 0.18 | 0.15 | 0.11 | 0.029  | NA |
| chr7 | 103968783 | 103969959 | LHFPL3       | ENSG00000187416 | 267   | 0.27 | 0.21 | 0.11 | 0.053  | NA |
| chr7 | 141401432 | 141402207 | KIAA1147     | ENSG00000127359 | 134   | 0.14 | 0.19 | 0.11 | -0.05  | NA |
| chr7 | 148638035 | 148638324 | RNY5         | ENSG00000252310 | -401  | 0.42 | 0.27 | 0.11 | 0.15   | NA |
| chr7 | 150674737 | 150675026 | KCNH2        | ENSG00000055118 | 133   | 0.22 | 0.39 | 0.11 | -0.17  | NA |
| chr7 | 155325811 | 155326357 | CNPY1        | ENSG00000146910 | 449   | 0.2  | 0.29 | 0.11 | -0.09  | NA |
| chr7 | 2296353   | 2297249   | SNX8         | ENSG00000106266 | 452   | 0.91 | 0.94 | 0.12 | -0.037 | NA |
| chr7 | 23719619  | 23720006  | C7orf46      | ENSG00000188732 | 63    | 0.19 | 0.14 | 0.12 | 0.051  | NA |
| chr7 | 47621112  | 47621727  | TNS3         | ENSG00000136205 | -190  | 0.2  | 0.15 | 0.12 | 0.049  | NA |
| chr7 | 55000876  | 55001135  | RP4-791C19.1 | ENSG00000218586 | -387  | 0.18 | 0.12 | 0.12 | 0.059  | NA |
| chr7 | 64126715  | 64126994  | ZNF107       | ENSG00000196247 | 278   | 0.2  | 0.12 | 0.12 | 0.071  | NA |
| chr7 | 72992434  | 72993397  | TBL2         | ENSG00000106638 | -316  | 0.12 | 0.16 | 0.12 | -0.042 | NA |
| chr7 | 105028260 | 105029774 | SRPK2        | ENSG00000135250 | 324   | 0.24 | 0.2  | 0.12 | 0.042  | NA |
| chr7 | 105516844 | 105517963 | ATXN7L1      | ENSG00000146776 | -480  | 0.18 | 0.25 | 0.12 | -0.078 | NA |
| chr7 | 111202079 | 111202683 | IMMP2L       | ENSG00000184903 | -34   | 0.18 | 0.23 | 0.12 | -0.056 | NA |
| chr7 | 128502715 | 128503276 | ATP6V1F      | ENSG00000128524 | 115   | 0.27 | 0.2  | 0.12 | 0.073  | NA |
| chr7 | 6793645   | 6793978   | RSPH10B2     | ENSG00000169402 | 71    | 0.14 | 0.4  | 0.13 | -0.25  | NA |
| chr7 | 16684239  | 16684505  | ANKMY2       | ENSG00000106524 | 915   | 0.18 | 0.5  | 0.13 | -0.32  | NA |
| chr7 | 55954935  | 55955387  | RP11-15K19.2 | ENSG00000249773 | 191   | 0.25 | 0.17 | 0.13 | 0.085  | NA |

|      |           |           |               |                 |      |      |      |      |        |    |
|------|-----------|-----------|---------------|-----------------|------|------|------|------|--------|----|
| chr7 | 77044840  | 77045719  | PION          | ENSG00000186088 | -95  | 0.29 | 0.21 | 0.13 | 0.085  | NA |
| chr7 | 89840813  | 89841491  | AC002064.3    | ENSG00000227646 | -203 | 0.31 | 0.24 | 0.13 | 0.072  | NA |
| chr7 | 1126578   | 1126910   | GPER          | ENSG00000164850 | 232  | 0.32 | 0.58 | 0.14 | -0.26  | NA |
| chr7 | 5266921   | 5267306   | WIPI2         | ENSG00000157954 | 1532 | 0.95 | 0.86 | 0.14 | 0.089  | NA |
| chr7 | 23570757  | 23571819  | TRA2A         | ENSG00000164548 | 11   | 0.2  | 0.27 | 0.14 | -0.068 | NA |
| chr7 | 27203915  | 27206462  | HOXA9         | ENSG00000078399 | -117 | 0.28 | 0.25 | 0.14 | 0.035  | NA |
| chr7 | 27278945  | 27279469  | RP1-170O19.17 | ENSG00000253308 | 1640 | 0.27 | 0.21 | 0.14 | 0.057  | NA |
| chr7 | 37955622  | 37956555  | SFRP4         | ENSG00000106483 | 332  | 0.15 | 0.2  | 0.14 | -0.046 | NA |
| chr7 | 139043885 | 139045478 | LUC7L2        | ENSG00000146963 | 54   | 0.17 | 0.21 | 0.14 | -0.042 | NA |
| chr7 | 148480129 | 148480504 | AC006323.1    | ENSG00000239325 | 1169 | 0.65 | 0.57 | 0.14 | 0.082  | NA |
| chr7 | 151825925 | 151826675 | RP5-981O7.3   | ENSG00000213188 | 336  | 0.98 | 1    | 0.14 | -0.019 | NA |
| chr7 | 5820472   | 5821444   | RNF216        | ENSG00000011275 | 293  | 0.14 | 0.17 | 0.15 | -0.033 | NA |
| chr7 | 6570453   | 6571095   | GRID2IP       | ENSG00000215045 | 43   | 0.22 | 0.28 | 0.15 | -0.061 | NA |
| chr7 | 28219435  | 28219697  | AC005017.1    | ENSG00000234336 | -375 | 0.25 | 0.13 | 0.15 | 0.12   | NA |
| chr7 | 29603540  | 29604793  | PRR15         | ENSG00000176532 | 739  | 0.19 | 0.23 | 0.15 | -0.041 | NA |
| chr7 | 66205245  | 66206565  | KCTD7         | ENSG00000243335 | 262  | 0.16 | 0.14 | 0.15 | 0.026  | NA |
| chr7 | 75114831  | 75115715  | AC006014.7    | ENSG00000242073 | 112  | 0.2  | 0.14 | 0.15 | 0.064  | NA |
| chr7 | 134854975 | 134855696 | C7orf49       | ENSG00000122783 | -72  | 0.23 | 0.17 | 0.15 | 0.063  | NA |
| chr7 | 5526389   | 5526693   | snoU13        | ENSG00000238394 | 1515 | 0.17 | 0.31 | 0.16 | -0.14  | NA |
| chr7 | 92219060  | 92219873  | FAM133B       | ENSG00000234545 | -122 | 0.23 | 0.18 | 0.16 | 0.05   | NA |
| chr7 | 96746767  | 96747190  | ACN9          | ENSG00000196636 | -35  | 0.15 | 0.25 | 0.16 | -0.1   | NA |
| chr7 | 99036099  | 99036892  | PTCD1         | ENSG00000106246 | -225 | 0.19 | 0.24 | 0.16 | -0.047 | NA |
| chr7 | 100253782 | 100254150 | ACTL6B        | ENSG00000077080 | 23   | 0.21 | 0.14 | 0.16 | 0.072  | NA |
| chr7 | 100888069 | 100888488 | FIS1          | ENSG00000214253 | 51   | 0.22 | 0.15 | 0.16 | 0.066  | NA |
| chr7 | 102715106 | 102716015 | FBXL13        | ENSG00000161040 | -388 | 0.2  | 0.24 | 0.16 | -0.042 | NA |
| chr7 | 139167480 | 139168712 | KLRG2         | ENSG00000188883 | 313  | 0.16 | 0.2  | 0.16 | -0.036 | NA |
| chr7 | 148725047 | 148726161 | PDIA4         | ENSG00000155660 | -44  | 0.17 | 0.21 | 0.16 | -0.038 | NA |
| chr7 | 149470114 | 149471054 | ZNF467        | ENSG00000181444 | -276 | 0.3  | 0.23 | 0.16 | 0.062  | NA |
| chr7 | 149535243 | 149536037 | ZNF862        | ENSG00000106479 | 184  | 0.15 | 0.2  | 0.16 | -0.042 | NA |
| chr7 | 150075939 | 150076856 | ZNF775        | ENSG00000196456 | -21  | 0.17 | 0.22 | 0.16 | -0.051 | NA |

|      |           |           |              |                 |       |      |      |      |        |    |
|------|-----------|-----------|--------------|-----------------|-------|------|------|------|--------|----|
| chr7 | 154861797 | 154862074 | HTR5A        | ENSG00000157219 | -99   | 0.18 | 0.67 | 0.16 | -0.49  | NA |
| chr7 | 1590387   | 1591020   | TMEM184A     | ENSG00000164855 | -137  | 0.91 | 0.94 | 0.17 | -0.033 | NA |
| chr7 | 36406370  | 36407017  | KIAA0895     | ENSG00000164542 | -171  | 0.18 | 0.24 | 0.17 | -0.061 | NA |
| chr7 | 45127979  | 45128263  | NACAD        | ENSG00000136274 | 392   | 0.25 | 0.75 | 0.17 | -0.5   | NA |
| chr7 | 45197181  | 45197807  | RAMP3        | ENSG00000122679 | 104   | 0.27 | 0.22 | 0.17 | 0.045  | NA |
| chr7 | 66767145  | 66768031  | PMS2P4       | ENSG00000067601 | -182  | 0.3  | 0.18 | 0.17 | 0.12   | NA |
| chr7 | 72971527  | 72972220  | BCL7B        | ENSG00000106635 | -332  | 0.21 | 0.27 | 0.17 | -0.06  | NA |
| chr7 | 98030097  | 98030422  | AC093799.1   | ENSG00000006453 | 121   | 0.12 | 0.2  | 0.17 | -0.073 | NA |
| chr7 | 99070295  | 99070859  | ZNF789       | ENSG00000198556 | 113   | 0.27 | 0.14 | 0.17 | 0.13   | NA |
| chr7 | 100201614 | 100203652 | PCOLCE       | ENSG00000106333 | 978   | 0.22 | 0.26 | 0.17 | -0.038 | NA |
| chr7 | 107641795 | 107644058 | LAMB1        | ENSG00000091136 | -454  | 0.27 | 0.23 | 0.17 | 0.042  | NA |
| chr7 | 128784695 | 128785096 | TSPAN33      | ENSG00000158457 | 183   | 0.26 | 0.19 | 0.17 | 0.07   | NA |
| chr7 | 128864320 | 128865655 | AHCYL2       | ENSG00000158467 | 123   | 0.23 | 0.27 | 0.17 | -0.045 | NA |
| chr7 | 136553854 | 136556194 | CHRM2        | ENSG00000181072 | 1155  | 0.22 | 0.28 | 0.17 | -0.061 | NA |
| chr7 | 1535617   | 1536099   | INTS1        | ENSG00000164880 | -10   | 0.89 | 0.95 | 0.18 | -0.056 | NA |
| chr7 | 23287221  | 23287508  | GPNMB        | ENSG00000136235 | 970   | 0.24 | 0.19 | 0.18 | 0.05   | NA |
| chr7 | 36192591  | 36193434  | EEPD1        | ENSG00000122547 | 254   | 0.17 | 0.21 | 0.18 | -0.043 | NA |
| chr7 | 90225082  | 90226364  | AC002456.2   | ENSG00000223969 | -519  | 0.14 | 0.17 | 0.18 | -0.034 | NA |
| chr7 | 99063423  | 99063624  | ATP5J2       | ENSG00000241468 | 261   | 0.13 | 0.33 | 0.18 | -0.2   | NA |
| chr7 | 766085    | 766952    | HEATR2       | ENSG00000164818 | 180   | 0.24 | 0.18 | 0.19 | 0.052  | NA |
| chr7 | 4824365   | 4824680   | KIAA0415     | ENSG00000242802 | -1484 | 0.74 | 0.81 | 0.19 | -0.068 | NA |
| chr7 | 11013426  | 11013888  | PHF14        | ENSG00000106443 | 158   | 0.25 | 0.36 | 0.19 | -0.11  | NA |
| chr7 | 27186927  | 27187692  | RP1-170O19.2 | ENSG00000254369 | 207   | 0.32 | 0.27 | 0.19 | 0.052  | NA |
| chr7 | 42971634  | 42972299  | PSMA2        | ENSG00000106588 | -213  | 0.26 | 0.17 | 0.19 | 0.087  | NA |
| chr7 | 97736035  | 97736854  | LMTK2        | ENSG00000164715 | 247   | 0.19 | 0.25 | 0.19 | -0.061 | NA |
| chr7 | 5183878   | 5184223   | ZNF890P      | ENSG00000159904 | 127   | 0.53 | 0.62 | 0.2  | -0.086 | NA |
| chr7 | 5322680   | 5323193   | SLC29A4      | ENSG00000164638 | 276   | 0.19 | 0.25 | 0.2  | -0.058 | NA |
| chr7 | 7606372   | 7607023   | MIOS         | ENSG00000164654 | 194   | 0.22 | 0.31 | 0.2  | -0.092 | NA |
| chr7 | 27195601  | 27196567  | HOXA7        | ENSG00000122592 | -467  | 0.18 | 0.14 | 0.2  | 0.043  | NA |
| chr7 | 31091717  | 31093077  | ADCYAP1R1    | ENSG00000078549 | 321   | 0.24 | 0.19 | 0.2  | 0.048  | NA |

|      |           |           |               |                 |       |      |      |      |        |    |
|------|-----------|-----------|---------------|-----------------|-------|------|------|------|--------|----|
| chr7 | 93633439  | 93633910  | BET1          | ENSG00000105829 | -7    | 0.27 | 0.19 | 0.2  | 0.081  | NA |
| chr7 | 128555329 | 128556650 | RP11-309L24.6 | ENSG00000224163 | -1872 | 0.65 | 0.69 | 0.2  | -0.043 | NA |
| chr7 | 152456740 | 152457511 | ACTR3B        | ENSG00000133627 | 291   | 0.22 | 0.18 | 0.2  | 0.039  | NA |
| chr7 | 5400611   | 5401610   | TNRC18        | ENSG00000182095 | 548   | 0.87 | 0.91 | 0.21 | -0.04  | NA |
| chr7 | 6487306   | 6487750   | DAGLB         | ENSG00000164535 | 35    | 0.15 | 0.19 | 0.21 | -0.04  | NA |
| chr7 | 87256958  | 87258444  | RUNDC3B       | ENSG00000105784 | 713   | 0.2  | 0.16 | 0.21 | 0.039  | NA |
| chr7 | 91808331  | 91808632  | AC000120.8    | ENSG00000240720 | -40   | 0.21 | 0.3  | 0.21 | -0.092 | NA |
| chr7 | 97881132  | 97881906  | TECPRI        | ENSG00000205356 | -280  | 0.18 | 0.14 | 0.21 | 0.043  | NA |
| chr7 | 99755854  | 99756459  | C7orf43       | ENSG00000146826 | 126   | 0.18 | 0.25 | 0.21 | -0.071 | NA |
| chr7 | 100608736 | 100609793 | RP11-395B7.2  | ENSG00000225946 | 22    | 0.16 | 0.18 | 0.21 | -0.025 | NA |
| chr7 | 117512942 | 117513865 | CTTNBP2       | ENSG00000077063 | 80    | 0.16 | 0.13 | 0.21 | 0.036  | NA |
| chr7 | 138915434 | 138916956 | UBN2          | ENSG00000157741 | -36   | 0.18 | 0.21 | 0.21 | -0.032 | NA |
| chr7 | 148844254 | 148845556 | ZNF398        | ENSG00000197024 | 345   | 0.18 | 0.21 | 0.21 | -0.029 | NA |
| chr7 | 158648984 | 158649759 | WDR60         | ENSG00000126870 | 102   | 0.19 | 0.16 | 0.21 | 0.033  | NA |
| chr7 | 23720367  | 23720677  | AC006026.13   | ENSG00000234286 | -117  | 0.31 | 0.17 | 0.22 | 0.15   | NA |
| chr7 | 76022369  | 76023172  | SRCRB4D       | ENSG00000146700 | 37    | 0.2  | 0.15 | 0.22 | 0.049  | NA |
| chr7 | 101929503 | 101931089 | SH2B2         | ENSG00000160999 | 1844  | 0.23 | 0.2  | 0.22 | 0.029  | NA |
| chr7 | 116502427 | 116502920 | CAPZA2        | ENSG00000198898 | 146   | 0.1  | 1    | 0.22 | -0.9   | NA |
| chr7 | 128694513 | 128695357 | TNPO3         | ENSG00000064419 | 2     | 0.27 | 0.37 | 0.22 | -0.1   | NA |
| chr7 | 132260474 | 132262527 | PLXNA4        | ENSG00000221866 | -271  | 0.18 | 0.2  | 0.22 | -0.026 | NA |
| chr7 | 135347056 | 135347498 | AC091736.5    | ENSG00000243317 | 33    | 0.16 | 0.21 | 0.22 | -0.045 | NA |
| chr7 | 140372743 | 140373443 | ADCK2         | ENSG00000133597 | 140   | 0.13 | 0.17 | 0.22 | -0.039 | NA |
| chr7 | 5111620   | 5112088   | RBAK          | ENSG00000146587 | 98    | 0.4  | 0.29 | 0.23 | 0.11   | NA |
| chr7 | 43908911  | 43909478  | MRPS24        | ENSG00000062582 | -88   | 0.36 | 0.22 | 0.23 | 0.14   | NA |
| chr7 | 917632    | 917859    | GET4          | ENSG00000239857 | 203   | 0.25 | 0.17 | 0.23 | 0.079  | NA |
| chr7 | 19156050  | 19158042  | TWIST1        | ENSG00000122691 | -499  | 0.26 | 0.23 | 0.23 | 0.03   | NA |
| chr7 | 87849003  | 87849594  | SRI           | ENSG00000075142 | 53    | 0.24 | 0.16 | 0.23 | 0.078  | NA |
| chr7 | 100080693 | 100081371 | C7orf51       | ENSG00000166924 | -518  | 0.19 | 0.24 | 0.23 | -0.05  | NA |
| chr7 | 102105123 | 102105782 | ALKBH4        | ENSG00000160993 | -148  | 0.14 | 0.18 | 0.23 | -0.036 | NA |
| chr7 | 129592032 | 129592891 | UBE2H         | ENSG00000186591 | -90   | 0.17 | 0.21 | 0.23 | -0.039 | NA |

|      |           |           |               |                 |       |      |      |      |        |    |
|------|-----------|-----------|---------------|-----------------|-------|------|------|------|--------|----|
| chr7 | 142494563 | 142495248 | TRBJ2-4       | ENSG00000211768 | 223   | 0.16 | 0.2  | 0.23 | -0.046 | NA |
| chr7 | 44621293  | 44622377  | TMED4         | ENSG00000158604 | -26   | 0.18 | 0.26 | 0.24 | -0.078 | NA |
| chr7 | 44788714  | 44789119  | ZMIZ2         | ENSG00000122515 | 355   | 0.15 | 0.3  | 0.24 | -0.15  | NA |
| chr7 | 66021169  | 66022278  | RP4-756H11.1  | ENSG00000232491 | 520   | 0.94 | 0.9  | 0.24 | 0.037  | NA |
| chr7 | 129845146 | 129845424 | TMEM209       | ENSG00000146842 | -97   | 0.22 | 0.13 | 0.24 | 0.084  | NA |
| chr7 | 149570366 | 149571272 | RP4-751H13.6  | ENSG00000204934 | 112   | 0.21 | 0.25 | 0.24 | -0.038 | NA |
| chr7 | 32767535  | 32768848  | AC018648.6    | ENSG00000237004 | 449   | 0.23 | 0.18 | 0.25 | 0.045  | NA |
| chr7 | 23145211  | 23146037  | AC006039.4    | ENSG00000230658 | -302  | 0.16 | 0.2  | 0.25 | -0.042 | NA |
| chr7 | 95225503  | 95226194  | PDK4          | ENSG00000004799 | -76   | 0.2  | 0.16 | 0.25 | 0.041  | NA |
| chr7 | 96338816  | 96339277  | SHFM1         | ENSG00000127922 | 78    | 0.15 | 0.21 | 0.25 | -0.066 | NA |
| chr7 | 100964790 | 100965201 | RABL5         | ENSG00000128581 | 50    | 0.17 | 0.1  | 0.25 | 0.063  | NA |
| chr7 | 114562170 | 114563193 | MDFIC         | ENSG00000135272 | 472   | 0.17 | 0.21 | 0.25 | -0.036 | NA |
| chr7 | 128001346 | 128002066 | PRRT4         | ENSG00000224940 | -48   | 0.2  | 0.25 | 0.25 | -0.051 | NA |
| chr7 | 138793113 | 138794608 | ZC3HAV1       | ENSG00000105939 | 240   | 0.19 | 0.21 | 0.25 | -0.027 | NA |
| chr7 | 419519    | 419916    | AC226118.1    | ENSG00000249574 | 392   | 0.22 | 0.17 | 0.26 | 0.044  | NA |
| chr7 | 2718826   | 2719124   | AMZ1          | ENSG00000174945 | -181  | 0.27 | 0.17 | 0.26 | 0.1    | NA |
| chr7 | 14030965  | 14031213  | ETV1          | ENSG00000006468 | -80   | 0.34 | 0.54 | 0.26 | -0.2   | NA |
| chr7 | 27227520  | 27229043  | HOXA11-AS1    | ENSG00000240990 | 843   | 0.28 | 0.23 | 0.26 | 0.05   | NA |
| chr7 | 30810863  | 30811550  | FAM188B       | ENSG00000106125 | 173   | 0.22 | 0.28 | 0.26 | -0.061 | NA |
| chr7 | 98990157  | 98990922  | ARPC1B        | ENSG00000130429 | -1126 | 0.22 | 0.26 | 0.26 | -0.039 | NA |
| chr7 | 151216068 | 151217901 | RHEB          | ENSG00000106615 | -715  | 0.22 | 0.19 | 0.26 | 0.034  | NA |
| chr7 | 976647    | 976894    | ADAP1         | ENSG00000105963 | -1954 | 0.76 | 0.86 | 0.27 | -0.095 | NA |
| chr7 | 128379114 | 128379697 | CALU          | ENSG00000128595 | 59    | 0.23 | 0.18 | 0.27 | 0.05   | NA |
| chr7 | 1514354   | 1514578   | INTS1         | ENSG00000164880 | 1320  | 0.85 | 0.92 | 0.28 | -0.072 | NA |
| chr7 | 37487354  | 37488672  | ELMO1         | ENSG00000155849 | 446   | 0.16 | 0.19 | 0.28 | -0.031 | NA |
| chr7 | 41745178  | 41745462  | AC005027.3    | ENSG00000236310 | -387  | 0.28 | 0.43 | 0.28 | -0.15  | NA |
| chr7 | 61820458  | 61822022  | RP11-715L17.1 | ENSG00000233918 | -629  | 0.66 | 0.69 | 0.28 | -0.024 | NA |
| chr7 | 86848911  | 86850024  | C7orf23       | ENSG00000135185 | -525  | 0.21 | 0.24 | 0.28 | -0.032 | NA |
| chr7 | 99214144  | 99214885  | ZNF498        | ENSG00000197037 | -55   | 0.23 | 0.19 | 0.28 | 0.038  | NA |
| chr7 | 105924650 | 105925975 | NAMPT         | ENSG00000105835 | -234  | 0.21 | 0.24 | 0.28 | -0.03  | NA |



|      |           |           |               |                 |       |      |      |      |        |    |
|------|-----------|-----------|---------------|-----------------|-------|------|------|------|--------|----|
| chr7 | 1177726   | 1178255   | C7orf50       | ENSG00000146540 | -114  | 0.16 | 0.12 | 0.29 | 0.039  | NA |
| chr7 | 26331463  | 26331944  | SNX10         | ENSG00000086300 | 162   | 0.2  | 0.13 | 0.29 | 0.068  | NA |
| chr7 | 29233704  | 29235046  | CHN2          | ENSG00000106069 | 347   | 0.18 | 0.15 | 0.29 | 0.027  | NA |
| chr7 | 39988922  | 39991612  | CDK13         | ENSG00000065883 | 631   | 0.17 | 0.19 | 0.29 | -0.019 | NA |
| chr7 | 64029902  | 64030972  | RP11-561N12.5 | ENSG00000213642 | 378   | 0.23 | 0.3  | 0.29 | -0.076 | NA |
| chr7 | 127031854 | 127033084 | ZNF800        | ENSG00000048405 | -297  | 0.27 | 0.23 | 0.29 | 0.034  | NA |
| chr7 | 129710092 | 129710493 | KLHDC10       | ENSG00000128607 | -58   | 0.17 | 0.21 | 0.29 | -0.045 | NA |
| chr7 | 143058917 | 143060156 | FAM131B       | ENSG00000159784 | -388  | 0.2  | 0.23 | 0.29 | -0.031 | NA |
| chr7 | 150783480 | 150785040 | AGAP3         | ENSG00000133612 | 434   | 0.17 | 0.15 | 0.29 | 0.021  | NA |
| chr7 | 37960316  | 37961046  | EPDR1         | ENSG00000086289 | -241  | 0.18 | 0.26 | 0.3  | -0.074 | NA |
| chr7 | 73133388  | 73134204  | STX1A         | ENSG00000106089 | 160   | 0.16 | 0.19 | 0.3  | -0.026 | NA |
| chr7 | 86688832  | 86689238  | KIAA1324L     | ENSG00000164659 | -88   | 0.35 | 0.23 | 0.3  | 0.12   | NA |
| chr7 | 122525748 | 122526959 | CADPS2        | ENSG00000081803 | 58    | 0.22 | 0.19 | 0.3  | 0.03   | NA |
| chr7 | 134001207 | 134001982 | SLC35B4       | ENSG00000205060 | 55    | 0.14 | 0.18 | 0.3  | -0.041 | NA |
| chr7 | 138720044 | 138721019 | ZC3HAV1L      | ENSG00000146858 | 232   | 0.2  | 0.16 | 0.3  | 0.034  | NA |
| chr7 | 150934649 | 150934869 | MIR671        | ENSG00000211517 | -748  | 0.81 | 0.88 | 0.3  | -0.074 | NA |
| chr7 | 27146069  | 27146600  | AC004080.12   | ENSG00000253552 | -1062 | 0.24 | 0.18 | 0.31 | 0.055  | NA |
| chr7 | 45928002  | 45928585  | IGFBP1        | ENSG00000146678 | 197   | 0.24 | 0.2  | 0.31 | 0.046  | NA |
| chr7 | 140339997 | 140341136 | DENND2A       | ENSG00000146966 | -468  | 0.2  | 0.18 | 0.31 | 0.025  | NA |
| chr7 | 25219408  | 25219962  | C7orf31       | ENSG00000153790 | -18   | 0.19 | 0.23 | 0.32 | -0.044 | NA |
| chr7 | 102157823 | 102158510 | RASA4B        | ENSG00000170667 | -9    | 1    | 0.12 | 0.32 | 0.88   | NA |
| chr7 | 112429980 | 112430566 | TMEM168       | ENSG00000146802 | 161   | 0.24 | 0.18 | 0.32 | 0.058  | NA |
| chr7 | 153583317 | 153585666 | DPP6          | ENSG00000130226 | 309   | 0.18 | 0.2  | 0.32 | -0.027 | NA |
| chr7 | 6523064   | 6523897   | KDELR2        | ENSG00000136240 | 208   | 0.14 | 0.16 | 0.33 | -0.02  | NA |
| chr7 | 27282086  | 27283136  | EVX1          | ENSG00000106038 | 447   | 0.25 | 0.21 | 0.33 | 0.038  | NA |
| chr7 | 36429250  | 36429806  | ANLN          | ENSG00000011426 | 113   | 0.21 | 0.14 | 0.33 | 0.065  | NA |
| chr7 | 44058608  | 44058988  | POLR2J4       | ENSG00000214783 | -86   | 0.26 | 0.33 | 0.33 | -0.071 | NA |
| chr7 | 44529710  | 44530557  | NUDCD3        | ENSG00000015676 | -269  | 0.31 | 0.39 | 0.33 | -0.079 | NA |
| chr7 | 66119075  | 66120404  | RP4-756H11.3  | ENSG00000226824 | 214   | 0.15 | 0.17 | 0.33 | -0.021 | NA |
| chr7 | 113724924 | 113727795 | FOXP2         | ENSG00000128573 | -23   | 0.15 | 0.17 | 0.33 | -0.018 | NA |

|      |           |           |            |                 |       |      |      |      |        |    |
|------|-----------|-----------|------------|-----------------|-------|------|------|------|--------|----|
| chr7 | 150725173 | 150726018 | ABCB8      | ENSG00000197150 | 85    | 0.17 | 0.22 | 0.33 | -0.055 | NA |
| chr7 | 156685008 | 156686179 | LMBR1      | ENSG00000105983 | -320  | 0.26 | 0.21 | 0.33 | 0.049  | NA |
| chr7 | 191875    | 193799    | FAM20C     | ENSG00000177706 | -132  | 0.19 | 0.17 | 0.34 | 0.017  | NA |
| chr7 | 1498575   | 1499123   | MICALL2    | ENSG00000164877 | 113   | 0.23 | 0.18 | 0.34 | 0.05   | NA |
| chr7 | 4798529   | 4799281   | FOXK1      | ENSG00000164916 | 1265  | 0.92 | 1    | 0.34 | -0.077 | NA |
| chr7 | 18125914  | 18127009  | HDAC9      | ENSG00000048052 | -111  | 0.16 | 0.18 | 0.34 | -0.025 | NA |
| chr7 | 29845881  | 29846751  | WIPF3      | ENSG00000122574 | 214   | 0.19 | 0.17 | 0.34 | 0.024  | NA |
| chr7 | 101838731 | 101839597 | SNORA48    | ENSG00000252824 | -1720 | 0.95 | 0.93 | 0.34 | 0.023  | NA |
| chr7 | 29603109  | 29603328  | AC007255.8 | ENSG00000223813 | 61    | 0.44 | 0.31 | 0.35 | 0.12   | NA |
| chr7 | 32996732  | 32997591  | FKBP9      | ENSG00000122642 | 144   | 0.2  | 0.23 | 0.35 | -0.023 | NA |
| chr7 | 43152020  | 43153340  | HECW1      | ENSG00000002746 | 482   | 0.23 | 0.26 | 0.35 | -0.03  | NA |
| chr7 | 44887267  | 44888070  | H2AFV      | ENSG00000105968 | -48   | 0.22 | 0.27 | 0.35 | -0.049 | NA |
| chr7 | 74508135  | 74509130  | GTF2IRD2B  | ENSG00000174428 | 268   | 0.5  | 0.21 | 0.35 | 0.29   | NA |
| chr7 | 94536849  | 94537477  | PPP1R9A    | ENSG00000158528 | 214   | 0.21 | 0.18 | 0.35 | 0.032  | NA |
| chr7 | 99516602  | 99517296  | TRIM4      | ENSG00000146833 | -221  | 0.17 | 0.21 | 0.35 | -0.034 | NA |
| chr7 | 116164703 | 116166735 | CAV1       | ENSG00000105974 | 880   | 0.19 | 0.21 | 0.35 | -0.028 | NA |
| chr7 | 7679840   | 7680679   | RPA3       | ENSG00000106399 | -51   | 0.25 | 0.14 | 0.36 | 0.11   | NA |
| chr7 | 56032046  | 56032903  | GBAS       | ENSG00000146729 | 200   | 0.23 | 0.2  | 0.36 | 0.029  | NA |
| chr7 | 139875411 | 139877493 | JHDM1D     | ENSG00000006459 | 289   | 0.21 | 0.22 | 0.36 | -0.019 | NA |
| chr7 | 588913    | 589544    | AC147651.1 | ENSG00000252986 | -1142 | 0.84 | 0.89 | 0.37 | -0.051 | NA |
| chr7 | 4825116   | 4825345   | KIAA0415   | ENSG00000242802 | -776  | 0.89 | 0.97 | 0.37 | -0.074 | NA |
| chr7 | 6629328   | 6630235   | C7orf26    | ENSG00000146576 | 133   | 0.16 | 0.19 | 0.37 | -0.037 | NA |
| chr7 | 91763095  | 91764367  | CYP51A1    | ENSG00000001630 | 113   | 0.19 | 0.21 | 0.37 | -0.024 | NA |
| chr7 | 96634622  | 96634915  | DLX6       | ENSG00000006377 | -92   | 0.19 | 0.32 | 0.37 | -0.13  | NA |
| chr7 | 100171148 | 100172286 | AC069281.1 | ENSG00000205307 | -447  | 0.92 | 0.94 | 0.37 | -0.017 | NA |
| chr7 | 102073605 | 102074334 | ORAI2      | ENSG00000160991 | -13   | 0.16 | 0.19 | 0.37 | -0.032 | NA |
| chr7 | 139208442 | 139209069 | CLEC2L     | ENSG00000236279 | 153   | 0.23 | 0.18 | 0.37 | 0.047  | NA |
| chr7 | 12726156  | 12727248  | ARL4A      | ENSG00000122644 | 221   | 0.17 | 0.19 | 0.38 | -0.018 | NA |
| chr7 | 23221406  | 23221980  | NUPL2      | ENSG00000136243 | 247   | 0.17 | 0.2  | 0.38 | -0.027 | NA |
| chr7 | 89874321  | 89874855  | C7orf63    | ENSG00000105792 | 100   | 0.19 | 0.23 | 0.38 | -0.044 | NA |

|      |           |           |              |                 |       |      |      |      |        |    |
|------|-----------|-----------|--------------|-----------------|-------|------|------|------|--------|----|
| chr7 | 128430707 | 128432003 | CCDC136      | ENSG00000128596 | 544   | 0.25 | 0.22 | 0.38 | 0.029  | NA |
| chr7 | 139477406 | 139478496 | HIPK2        | ENSG00000064393 | -434  | 0.17 | 0.19 | 0.38 | -0.024 | NA |
| chr7 | 150417414 | 150418018 | GIMAP5       | ENSG00000196329 | -1625 | 0.93 | 0.96 | 0.38 | -0.026 | NA |
| chr7 | 965987    | 966266    | ADAP1        | ENSG00000105963 | 565   | 0.88 | 0.82 | 0.39 | 0.059  | NA |
| chr7 | 1913829   | 1914077   | MAD1L1       | ENSG00000002822 | -1561 | 0.94 | 0.97 | 0.39 | -0.029 | NA |
| chr7 | 4815019   | 4815542   | KIAA0415     | ENSG00000242802 | 27    | 0.2  | 0.25 | 0.39 | -0.054 | NA |
| chr7 | 82791674  | 82792412  | PCLO         | ENSG00000186472 | 154   | 0.2  | 0.23 | 0.39 | -0.028 | NA |
| chr7 | 1570406   | 1571136   | MAFK         | ENSG00000198517 | 421   | 0.32 | 0.25 | 0.4  | 0.064  | NA |
| chr7 | 6388210   | 6388743   | C7orf70      | ENSG00000178397 | 114   | 0.22 | 0.17 | 0.4  | 0.051  | NA |
| chr7 | 100472375 | 100473393 | SRRT         | ENSG00000087087 | 151   | 0.21 | 0.23 | 0.4  | -0.023 | NA |
| chr7 | 150676178 | 150676585 | KCNH2        | ENSG00000055118 | -978  | 0.23 | 0.29 | 0.4  | -0.061 | NA |
| chr7 | 1660480   | 1660781   | AC074389.5   | ENSG00000231476 | 340   | 0.98 | 0.94 | 0.41 | 0.033  | NA |
| chr7 | 48074838  | 48075985  | C7orf57      | ENSG00000164746 | 303   | 0.18 | 0.2  | 0.41 | -0.02  | NA |
| chr7 | 56297432  | 56297662  | CCNJP1       | ENSG00000227491 | -72   | 0.19 | 0.24 | 0.41 | -0.056 | NA |
| chr7 | 87505100  | 87506493  | DBF4         | ENSG00000006634 | 265   | 0.22 | 0.19 | 0.41 | 0.027  | NA |
| chr7 | 106300402 | 106301573 | AC004917.1   | ENSG00000177820 | 355   | 0.21 | 0.19 | 0.41 | 0.026  | NA |
| chr7 | 329258    | 331428    | WI2-237311.1 | ENSG00000248999 | -274  | 0.27 | 0.25 | 0.42 | 0.018  | NA |
| chr7 | 1515982   | 1516241   | INTS1        | ENSG00000164880 | -325  | 0.8  | 0.86 | 0.42 | -0.056 | NA |
| chr7 | 72717665  | 72717985  | NSUN5        | ENSG00000130305 | 875   | 0.89 | 0.82 | 0.42 | 0.068  | NA |
| chr7 | 107383657 | 107385021 | CBLL1        | ENSG00000105879 | 197   | 0.19 | 0.22 | 0.42 | -0.033 | NA |
| chr7 | 150757031 | 150757297 | SLC4A2       | ENSG00000164889 | 7     | 0.33 | 0.28 | 0.42 | 0.058  | NA |
| chr7 | 75931704  | 75932978  | HSPB1        | ENSG00000106211 | 480   | 0.18 | 0.15 | 0.43 | 0.025  | NA |
| chr7 | 93204085  | 93204381  | CALCR        | ENSG00000004948 | -191  | 0.14 | 0.17 | 0.43 | -0.036 | NA |
| chr7 | 45025958  | 45026626  | SNORA9       | ENSG00000206942 | -1183 | 0.29 | 0.19 | 0.44 | 0.096  | NA |
| chr7 | 99686452  | 99686839  | COPS6        | ENSG00000168090 | 68    | 0.15 | 0.17 | 0.44 | -0.021 | NA |
| chr7 | 100167136 | 100168144 | RP11-44M6.3  | ENSG00000184414 | -114  | 0.17 | 0.21 | 0.44 | -0.044 | NA |
| chr7 | 137531125 | 137532382 | DGKI         | ENSG00000157680 | -471  | 0.19 | 0.17 | 0.44 | 0.018  | NA |
| chr7 | 150652807 | 150653080 | KCNH2        | ENSG00000055118 | -45   | 0.32 | 0.22 | 0.44 | 0.1    | NA |
| chr7 | 154794017 | 154795750 | PAXIP1       | ENSG00000157212 | -262  | 0.18 | 0.2  | 0.44 | -0.017 | NA |
| chr7 | 155601175 | 155603235 | SHH          | ENSG00000164690 | -439  | 0.19 | 0.17 | 0.44 | 0.022  | NA |

|      |           |           |              |                 |       |      |      |      |        |    |
|------|-----------|-----------|--------------|-----------------|-------|------|------|------|--------|----|
| chr7 | 27182613  | 27185562  | HOXA5        | ENSG00000106004 | -800  | 0.24 | 0.22 | 0.45 | 0.016  | NA |
| chr7 | 75368062  | 75369078  | HIP1         | ENSG00000127946 | -317  | 0.16 | 0.18 | 0.45 | -0.019 | NA |
| chr7 | 89783567  | 89784081  | STEAP1       | ENSG00000164647 | 135   | 0.26 | 0.14 | 0.45 | 0.12   | NA |
| chr7 | 99005784  | 99006859  | PDAP1        | ENSG00000106244 | -108  | 0.21 | 0.24 | 0.45 | -0.023 | NA |
| chr7 | 127671158 | 127672853 | LRRC4        | ENSG00000128594 | -331  | 0.2  | 0.18 | 0.45 | 0.016  | NA |
| chr7 | 74489353  | 74489930  | WBSCR16      | ENSG00000174374 | -15   | 0.21 | 0.15 | 0.46 | 0.056  | NA |
| chr7 | 155302253 | 155303158 | AC008060.5   | ENSG00000227365 | -273  | 0.18 | 0.21 | 0.46 | -0.033 | NA |
| chr7 | 38670439  | 38671008  | AMPH         | ENSG00000078053 | 297   | 0.23 | 0.2  | 0.47 | 0.036  | NA |
| chr7 | 45808183  | 45808745  | SEPT7P2      | ENSG00000214765 | 89    | 0.29 | 0.19 | 0.47 | 0.11   | NA |
| chr7 | 97501183  | 97501919  | ASNS         | ENSG00000070669 | -360  | 0.16 | 0.13 | 0.47 | 0.032  | NA |
| chr7 | 43797823  | 43798802  | BLVRA        | ENSG00000106605 | 33    | 0.24 | 0.27 | 0.48 | -0.03  | NA |
| chr7 | 64254700  | 64255067  | ZNF138       | ENSG00000197008 | 117   | 0.13 | 0.16 | 0.48 | -0.038 | NA |
| chr7 | 79082174  | 79082427  | AC004945.2   | ENSG00000234456 | 102   | 0.12 | 0.2  | 0.48 | -0.075 | NA |
| chr7 | 87230059  | 87230260  | ABCB1        | ENSG00000085563 | -659  | 0.19 | 0.07 | 0.48 | 0.12   | NA |
| chr7 | 92076699  | 92077395  | GATAD1       | ENSG00000157259 | 280   | 0.22 | 0.19 | 0.48 | 0.029  | NA |
| chr7 | 1536621   | 1537489   | INTS1        | ENSG00000164880 | -1207 | 0.74 | 1    | 0.49 | -0.26  | NA |
| chr7 | 6311322   | 6312526   | CYTH3        | ENSG00000008256 | 351   | 0.21 | 0.23 | 0.49 | -0.021 | NA |
| chr7 | 22539545  | 22540022  | AC099759.1   | ENSG00000105889 | 13    | 0.15 | 0.27 | 0.49 | -0.12  | NA |
| chr7 | 27147589  | 27148389  | AC004080.12  | ENSG00000253552 | 593   | 0.29 | 0.25 | 0.49 | 0.038  | NA |
| chr7 | 56242406  | 56243298  | RP4-725G10.4 | ENSG00000233028 | -475  | 0.24 | 0.26 | 0.49 | -0.024 | NA |
| chr7 | 76178541  | 76179487  | AC004980.7   | ENSG00000205485 | 337   | 0.19 | 0.22 | 0.49 | -0.028 | NA |
| chr7 | 30066419  | 30066685  | FKBP14       | ENSG00000106080 | -252  | 0.19 | 0.23 | 0.5  | -0.049 | NA |
| chr7 | 32529753  | 32530146  | LSM5         | ENSG00000106355 | 24    | 0.43 | 0.37 | 0.5  | 0.058  | NA |
| chr7 | 42951216  | 42951905  | C7orf25      | ENSG00000136197 | -51   | 0.13 | 0.15 | 0.5  | -0.023 | NA |
| chr7 | 48019088  | 48019389  | HUS1         | ENSG00000136273 | -137  | 0.22 | 0.27 | 0.5  | -0.049 | NA |
| chr7 | 72935612  | 72937090  | BAZ1B        | ENSG00000009954 | 251   | 0.18 | 0.17 | 0.5  | 0.019  | NA |
| chr7 | 84569238  | 84569567  | AC074183.4   | ENSG00000232019 | 159   | 0.95 | 1    | 0.5  | -0.053 | NA |
| chr7 | 92157487  | 92158405  | PEX1         | ENSG00000127980 | -197  | 0.18 | 0.2  | 0.5  | -0.024 | NA |
| chr7 | 150554419 | 150554741 | ABP1         | ENSG00000002726 | -441  | 0.94 | 0.9  | 0.5  | 0.041  | NA |
| chr7 | 150747976 | 150748519 | ACCN3        | ENSG00000213199 | 240   | 0.18 | 0.2  | 0.5  | -0.023 | NA |

|      |           |           |              |                 |      |      |      |      |        |    |
|------|-----------|-----------|--------------|-----------------|------|------|------|------|--------|----|
| chr7 | 17979774  | 17980542  | SNX13        | ENSG00000071189 | -104 | 0.16 | 0.19 | 0.51 | -0.029 | NA |
| chr7 | 21466646  | 21467806  | SP4          | ENSG00000105866 | -426 | 0.2  | 0.22 | 0.51 | -0.024 | NA |
| chr7 | 25018999  | 25020255  | OSBPL3       | ENSG00000070882 | 133  | 0.19 | 0.21 | 0.51 | -0.018 | NA |
| chr7 | 43945583  | 43946456  | URGCP        | ENSG00000106608 | -109 | 0.23 | 0.26 | 0.51 | -0.024 | NA |
| chr7 | 100823307 | 100823701 | C7orf52      | ENSG00000167011 | -8   | 0.16 | 0.19 | 0.51 | -0.028 | NA |
| chr7 | 1515370   | 1515742   | INTS1        | ENSG00000164880 | 230  | 0.94 | 0.97 | 0.52 | -0.033 | NA |
| chr7 | 5427455   | 5429037   | TNRC18       | ENSG00000182095 | -586 | 0.94 | 0.93 | 0.52 | 0.0089 | NA |
| chr7 | 5938173   | 5938557   | CCZ1         | ENSG00000122674 | 9    | 1    | 0.67 | 0.52 | 0.33   | NA |
| chr7 | 30517987  | 30518610  | NOD1         | ENSG00000106100 | -46  | 0.12 | 0.15 | 0.52 | -0.023 | NA |
| chr7 | 21582443  | 21583313  | DNAH11       | ENSG00000105877 | 45   | 0.23 | 0.25 | 0.53 | -0.021 | NA |
| chr7 | 23338797  | 23339264  | C7orf30      | ENSG00000156928 | 211  | 0.14 | 0.11 | 0.53 | 0.028  | NA |
| chr7 | 27212416  | 27214396  | HOXA10       | ENSG00000253293 | -898 | 0.25 | 0.23 | 0.53 | 0.021  | NA |
| chr7 | 66056451  | 66057405  | GS1-124K5.12 | ENSG00000232559 | 445  | 0.15 | 0.18 | 0.53 | -0.021 | NA |
| chr7 | 106810128 | 106810329 | HBP1         | ENSG00000105856 | 63   | 0.2  | 0.16 | 0.53 | 0.04   | NA |
| chr7 | 120590584 | 120591328 | ING3         | ENSG00000071243 | 153  | 0.31 | 0.25 | 0.53 | 0.057  | NA |
| chr7 | 130794689 | 130795032 | MKLN1        | ENSG00000128585 | 5    | 0.26 | 0.33 | 0.53 | -0.073 | NA |
| chr7 | 6677238   | 6677551   | AC073343.9   | ENSG00000205903 | 441  | 0.22 | 0.18 | 0.54 | 0.045  | NA |
| chr7 | 99097277  | 99098104  | ZNF394       | ENSG00000160908 | -363 | 0.26 | 0.23 | 0.54 | 0.037  | NA |
| chr7 | 99155871  | 99156969  | ZNF655       | ENSG00000197343 | 391  | 0.2  | 0.22 | 0.54 | -0.023 | NA |
| chr7 | 117823984 | 117824485 | NAA38        | ENSG00000128534 | 148  | 0.21 | 0.18 | 0.54 | 0.035  | NA |
| chr7 | 6575923   | 6576389   | GRID2IP      | ENSG00000215045 | 372  | 0.22 | 0.26 | 0.55 | -0.037 | NA |
| chr7 | 16460778  | 16461265  | ISPD         | ENSG00000214960 | -74  | 0.21 | 0.19 | 0.55 | 0.02   | NA |
| chr7 | 56131778  | 56132226  | SUMF2        | ENSG00000129103 | 85   | 0.22 | 0.18 | 0.55 | 0.038  | NA |
| chr7 | 75508166  | 75508759  | RHBDD2       | ENSG00000005486 | 196  | 0.2  | 0.22 | 0.55 | -0.021 | NA |
| chr7 | 150754922 | 150755426 | CDK5         | ENSG00000164885 | -239 | 0.18 | 0.21 | 0.55 | -0.027 | NA |
| chr7 | 4998405   | 4998950   | MMD2         | ENSG00000136297 | 145  | 0.21 | 0.25 | 0.56 | -0.035 | NA |
| chr7 | 16566252  | 16566674  | AC005014.4   | ENSG00000205858 | -42  | 0.98 | 0.96 | 0.56 | 0.019  | NA |
| chr7 | 27169572  | 27170638  | RP1-170O19.2 | ENSG00000254369 | 509  | 0.17 | 0.19 | 0.56 | -0.019 | NA |
| chr7 | 73867787  | 73868061  | GTF2IRD1     | ENSG00000006704 | -196 | 0.19 | 0.23 | 0.56 | -0.035 | NA |
| chr7 | 150746002 | 150746381 | ACCN3        | ENSG00000213199 | 218  | 0.91 | 0.93 | 0.56 | -0.022 | NA |

|      |           |           |               |                 |       |      |      |      |        |    |
|------|-----------|-----------|---------------|-----------------|-------|------|------|------|--------|----|
| chr7 | 931767    | 932014    | GET4          | ENSG00000239857 | -47   | 0.92 | 1    | 0.57 | -0.078 | NA |
| chr7 | 1881181   | 1881391   | AC110781.5    | ENSG00000227990 | 526   | 0.91 | 0.97 | 0.57 | -0.059 | NA |
| chr7 | 44153157  | 44153501  | POLD2         | ENSG00000106628 | 1834  | 0.93 | 0.9  | 0.57 | 0.03   | NA |
| chr7 | 56949864  | 56950322  | RP13-580B18.1 | ENSG00000233437 | -254  | 0.8  | 0.84 | 0.57 | -0.039 | NA |
| chr7 | 75051059  | 75051612  | POM121C       | ENSG00000135213 | -767  | 0.96 | 1    | 0.57 | -0.041 | NA |
| chr7 | 151136933 | 151137273 | CRYGN         | ENSG00000127377 | -9    | 0.33 | 0.25 | 0.57 | 0.083  | NA |
| chr7 | 6676454   | 6676785   | AC073343.9    | ENSG00000205903 | -334  | 0.2  | 0.24 | 0.58 | -0.034 | NA |
| chr7 | 39015543  | 39015929  | POU6F2        | ENSG00000106536 | -1862 | 0.27 | 0.23 | 0.58 | 0.046  | NA |
| chr7 | 149410858 | 149412351 | KRBA1         | ENSG00000133619 | -268  | 0.36 | 0.38 | 0.58 | -0.02  | NA |
| chr7 | 807336    | 808261    | HEATR2        | ENSG00000164818 | -314  | 0.16 | 0.18 | 0.59 | -0.017 | NA |
| chr7 | 5644923   | 5645142   | FSCN1         | ENSG00000075618 | 1473  | 0.72 | 0.81 | 0.59 | -0.089 | NA |
| chr7 | 27284639  | 27286237  | RP1-170O19.16 | ENSG00000253405 | 1410  | 0.23 | 0.25 | 0.59 | -0.013 | NA |
| chr7 | 35733995  | 35734979  | HERPUD2       | ENSG00000122557 | -311  | 0.16 | 0.15 | 0.59 | 0.016  | NA |
| chr7 | 143582125 | 143582610 | FAM115A       | ENSG00000198420 | -3    | 0.17 | 0.12 | 0.59 | 0.052  | NA |
| chr7 | 1543280   | 1544399   | INTS1         | ENSG00000164880 | 164   | 0.2  | 0.22 | 0.6  | -0.017 | NA |
| chr7 | 7222020   | 7222974   | C1GALT1       | ENSG00000106392 | 319   | 0.21 | 0.19 | 0.6  | 0.022  | NA |
| chr7 | 22704823  | 22705421  | AC002480.2    | ENSG00000238033 | 30    | 0.94 | 0.96 | 0.6  | -0.017 | NA |
| chr7 | 71800757  | 71802768  | CALN1         | ENSG00000183166 | 218   | 0.19 | 0.21 | 0.6  | -0.014 | NA |
| chr7 | 72349774  | 72350765  | POM121        | ENSG00000196313 | 333   | 0.29 | 0.25 | 0.6  | 0.048  | NA |
| chr7 | 120497120 | 120498220 | TSPAN12       | ENSG00000106025 | -492  | 0.21 | 0.23 | 0.6  | -0.018 | NA |
| chr7 | 140097905 | 140098428 | SLC37A3       | ENSG00000157800 | 91    | 0.26 | 0.23 | 0.6  | 0.034  | NA |
| chr7 | 4874104   | 4875095   | RADIL         | ENSG00000157927 | 258   | 0.96 | 0.95 | 0.61 | 0.013  | NA |
| chr7 | 27219309  | 27219750  | RP1-170O19.20 | ENSG00000257184 | 103   | 0.28 | 0.21 | 0.61 | 0.064  | NA |
| chr7 | 128095678 | 128096197 | METTL2B       | ENSG00000165055 | 43    | 0.17 | 0.18 | 0.61 | -0.016 | NA |
| chr7 | 1014698   | 1015239   | COX19         | ENSG00000240230 | -216  | 0.26 | 0.29 | 0.62 | -0.036 | NA |
| chr7 | 56173912  | 56174398  | CHCHD2        | ENSG00000106153 | -31   | 0.23 | 0.2  | 0.62 | 0.03   | NA |
| chr7 | 151572761 | 151575106 | PRKAG2        | ENSG00000106617 | -60   | 0.21 | 0.2  | 0.62 | 0.013  | NA |
| chr7 | 157208794 | 157209008 | DNAJB6        | ENSG00000105993 | 802   | 0.95 | 0.98 | 0.62 | -0.033 | NA |
| chr7 | 158798591 | 158799434 | AC004863.6    | ENSG00000231419 | -201  | 0.95 | 0.91 | 0.62 | 0.039  | NA |
| chr7 | 195474    | 195988    | FAM20C        | ENSG00000177706 | 106   | 0.97 | 0.95 | 0.63 | 0.023  | NA |

|      |           |           |             |                 |      |      |      |      |        |    |
|------|-----------|-----------|-------------|-----------------|------|------|------|------|--------|----|
| chr7 | 2686757   | 2687306   | TTYH3       | ENSG00000136295 | -306 | 0.88 | 0.9  | 0.63 | -0.019 | NA |
| chr7 | 4828344   | 4828549   | KIAA0415    | ENSG00000242802 | 589  | 0.9  | 0.94 | 0.63 | -0.041 | NA |
| chr7 | 5360640   | 5360869   | TNRC18      | ENSG00000182095 | -461 | 0.98 | 0.97 | 0.63 | 0.013  | NA |
| chr7 | 6745867   | 6746716   | ZNF12       | ENSG00000164631 | -124 | 0.22 | 0.2  | 0.63 | 0.018  | NA |
| chr7 | 39662543  | 39663792  | RALA        | ENSG00000006451 | 85   | 0.18 | 0.17 | 0.63 | 0.015  | NA |
| chr7 | 72741804  | 72742710  | TRIM50      | ENSG00000146755 | -300 | 0.93 | 1    | 0.63 | -0.071 | NA |
| chr7 | 27238690  | 27240311  | HOXA13      | ENSG00000106031 | 225  | 0.19 | 0.18 | 0.64 | 0.014  | NA |
| chr7 | 80548306  | 80548726  | SEMA3C      | ENSG00000075223 | -18  | 0.18 | 0.16 | 0.64 | 0.024  | NA |
| chr7 | 99613104  | 99613797  | ZKSCAN1     | ENSG00000106261 | 246  | 0.23 | 0.25 | 0.64 | -0.019 | NA |
| chr7 | 100033262 | 100034253 | C7orf47     | ENSG00000160813 | -64  | 0.2  | 0.18 | 0.64 | 0.015  | NA |
| chr7 | 123174472 | 123174682 | IQUB        | ENSG00000164675 | 40   | 0.42 | 0.2  | 0.64 | 0.22   | NA |
| chr7 | 148982079 | 148982675 | RP4-800G7.2 | ENSG00000244560 | 5    | 0.17 | 0.16 | 0.64 | 0.015  | NA |
| chr7 | 2558371   | 2559967   | LFNG        | ENSG00000106003 | -307 | 0.19 | 0.18 | 0.65 | 0.013  | NA |
| chr7 | 75987606  | 75988977  | YWHAG       | ENSG00000170027 | -14  | 0.13 | 0.14 | 0.65 | -0.015 | NA |
| chr7 | 100492217 | 100494941 | ACHE        | ENSG00000087085 | -97  | 0.2  | 0.21 | 0.65 | -0.012 | NA |
| chr7 | 100797532 | 100798479 | AP1S1       | ENSG00000106367 | 327  | 0.26 | 0.24 | 0.65 | 0.026  | NA |
| chr7 | 102937857 | 102938141 | PMPCB       | ENSG00000105819 | 130  | 0.2  | 0.22 | 0.65 | -0.02  | NA |
| chr7 | 73790230  | 73790510  | CLIP2       | ENSG00000106665 | -30  | 0.79 | 0.87 | 0.66 | -0.08  | NA |
| chr7 | 126891300 | 126894205 | GRM8        | ENSG00000179603 | -317 | 0.18 | 0.19 | 0.66 | -0.01  | NA |
| chr7 | 155604725 | 155605095 | SHH         | ENSG00000164690 | 57   | 0.19 | 0.27 | 0.66 | -0.081 | NA |
| chr7 | 6703503   | 6704075   | AC073343.13 | ENSG00000228010 | 184  | 0.13 | 0.1  | 0.67 | 0.026  | NA |
| chr7 | 63386608  | 63386885  | RP11-73B2.6 | ENSG00000227910 | -91  | 0.5  | 1    | 0.67 | -0.5   | NA |
| chr7 | 75543965  | 75544775  | POR         | ENSG00000127948 | -27  | 0.18 | 0.16 | 0.67 | 0.013  | NA |
| chr7 | 128116667 | 128117312 | METTL2B     | ENSG00000165055 | 206  | 0.14 | 0.16 | 0.67 | -0.024 | NA |
| chr7 | 148823194 | 148824228 | ZNF425      | ENSG00000204947 | -313 | 0.16 | 0.15 | 0.67 | 0.015  | NA |
| chr7 | 295730    | 296831    | FAM20C      | ENSG00000177706 | 119  | 0.98 | 0.97 | 0.68 | 0.01   | NA |
| chr7 | 91569986  | 91570348  | AKAP9       | ENSG00000127914 | -14  | 0.16 | 0.19 | 0.68 | -0.032 | NA |
| chr7 | 123172732 | 123173231 | IQUB        | ENSG00000164675 | 21   | 0.3  | 0.37 | 0.68 | -0.07  | NA |
| chr7 | 150705759 | 150706129 | NOS3        | ENSG00000164867 | -18  | 0.37 | 0.4  | 0.68 | -0.027 | NA |
| chr7 | 100209594 | 100210655 | MOSPD3      | ENSG00000106330 | 399  | 0.24 | 0.26 | 0.69 | -0.022 | NA |

|      |           |           |               |                 |       |      |      |      |         |    |
|------|-----------|-----------|---------------|-----------------|-------|------|------|------|---------|----|
| chr7 | 123672063 | 123673691 | RP5-921G16.1  | ENSG00000242593 | 618   | 0.18 | 0.19 | 0.69 | -0.014  | NA |
| chr7 | 150929388 | 150930151 | CHPF2         | ENSG00000033100 | 194   | 0.18 | 0.2  | 0.69 | -0.017  | NA |
| chr7 | 150945352 | 150946161 | SMARCD3       | ENSG00000082014 | -24   | 0.23 | 0.21 | 0.69 | 0.022   | NA |
| chr7 | 107204114 | 107204797 | COG5          | ENSG00000164597 | -107  | 0.16 | 0.17 | 0.7  | -0.013  | NA |
| chr7 | 135661841 | 135662272 | MTPN          | ENSG00000105887 | 8     | 0.18 | 0.17 | 0.7  | 0.018   | NA |
| chr7 | 142551879 | 142553186 | EPHB6         | ENSG00000106123 | -260  | 0.19 | 0.2  | 0.7  | -0.015  | NA |
| chr7 | 5862830   | 5863066   | ZNF815        | ENSG00000235944 | 110   | 0.17 | 0.19 | 0.71 | -0.027  | NA |
| chr7 | 33943665  | 33945509  | BMPER         | ENSG00000164619 | 64    | 0.23 | 0.22 | 0.71 | 0.012   | NA |
| chr7 | 86781624  | 86782194  | DMTF1         | ENSG00000135164 | 232   | 0.18 | 0.2  | 0.71 | -0.018  | NA |
| chr7 | 102119203 | 102119605 | POLR2J        | ENSG00000005075 | -58   | 0.21 | 0.31 | 0.71 | -0.1    | NA |
| chr7 | 751712    | 752150    | PRKAR1B       | ENSG00000188191 | 278   | 0.16 | 0.18 | 0.72 | -0.023  | NA |
| chr7 | 985613    | 985913    | ADAP1         | ENSG00000105963 | -311  | 0.66 | 0.63 | 0.72 | 0.034   | NA |
| chr7 | 5569062   | 5570594   | ACTB          | ENSG00000075624 | -534  | 0.16 | 0.17 | 0.72 | -0.0086 | NA |
| chr7 | 73037528  | 73038957  | MLXIPL        | ENSG00000009950 | 580   | 0.16 | 0.15 | 0.72 | 0.0096  | NA |
| chr7 | 73588252  | 73589341  | EIF4H         | ENSG00000106682 | 221   | 0.16 | 0.17 | 0.72 | -0.01   | NA |
| chr7 | 131242693 | 131243006 | PODXL         | ENSG00000128567 | 127   | 0.18 | 0.21 | 0.72 | -0.028  | NA |
| chr7 | 33101938  | 33102907  | NT5C3         | ENSG00000122643 | -14   | 0.17 | 0.16 | 0.73 | 0.014   | NA |
| chr7 | 74071547  | 74073035  | GTF2I         | ENSG00000077809 | 297   | 0.23 | 0.21 | 0.73 | 0.012   | NA |
| chr7 | 95950779  | 95951636  | SLC25A13      | ENSG00000004864 | 116   | 0.15 | 0.14 | 0.73 | 0.01    | NA |
| chr7 | 100486729 | 100488093 | UFSP1         | ENSG00000176125 | -72   | 0.18 | 0.2  | 0.73 | -0.013  | NA |
| chr7 | 102789395 | 102790120 | NAPEPLD       | ENSG00000161048 | -334  | 0.18 | 0.17 | 0.73 | 0.012   | NA |
| chr7 | 45150987  | 45151554  | TBRG4         | ENSG00000136270 | -170  | 0.19 | 0.17 | 0.74 | 0.02    | NA |
| chr7 | 128045542 | 128046298 | IMPDH1        | ENSG00000106348 | -1    | 0.13 | 0.12 | 0.74 | 0.0096  | NA |
| chr7 | 150863966 | 150865511 | GBX1          | ENSG00000164900 | -103  | 0.22 | 0.23 | 0.74 | -0.01   | NA |
| chr7 | 27134097  | 27134303  | HOTAIRM1      | ENSG00000233429 | -1066 | 0.27 | 0.24 | 0.75 | 0.036   | NA |
| chr7 | 40173881  | 40175018  | C7orf11       | ENSG00000168303 | -191  | 0.19 | 0.21 | 0.75 | -0.012  | NA |
| chr7 | 123197660 | 123197925 | NDUFA5        | ENSG00000128609 | -59   | 0.31 | 0.38 | 0.75 | -0.06   | NA |
| chr7 | 56355508  | 56355798  | RP11-700P18.1 | ENSG00000223559 | -270  | 0.23 | 0.22 | 0.76 | 0.017   | NA |
| chr7 | 79763793  | 79764889  | GNAI1         | ENSG00000127955 | 527   | 0.18 | 0.19 | 0.76 | -0.012  | NA |
| chr7 | 100136448 | 100136919 | AGFG2         | ENSG00000106351 | -151  | 0.21 | 0.19 | 0.76 | 0.021   | NA |



|      |           |           |              |                 |       |      |      |      |         |    |
|------|-----------|-----------|--------------|-----------------|-------|------|------|------|---------|----|
| chr7 | 121943867 | 121944538 | FEZF1        | ENSG00000128610 | 289   | 0.28 | 0.25 | 0.76 | 0.033   | NA |
| chr7 | 141438004 | 141438393 | RP5-894A10.5 | ENSG00000228775 | -178  | 0.21 | 0.3  | 0.76 | -0.093  | NA |
| chr7 | 157293455 | 157294066 | AC006372.5   | ENSG00000223872 | -256  | 0.89 | 0.91 | 0.76 | -0.023  | NA |
| chr7 | 30028518  | 30029822  | SCRN1        | ENSG00000136193 | 158   | 0.18 | 0.17 | 0.77 | 0.0067  | NA |
| chr7 | 50343757  | 50344519  | IKZF1        | ENSG00000185811 | -186  | 0.16 | 0.15 | 0.77 | 0.012   | NA |
| chr7 | 100183527 | 100184625 | LRCH4        | ENSG00000077454 | -324  | 0.2  | 0.18 | 0.77 | 0.016   | NA |
| chr7 | 151092875 | 151093197 | WDR86        | ENSG00000187260 | -33   | 0.27 | 0.25 | 0.77 | 0.022   | NA |
| chr7 | 72722327  | 72722967  | NSUN5        | ENSG00000130305 | -97   | 0.16 | 0.17 | 0.78 | -0.011  | NA |
| chr7 | 72738347  | 72738639  | TRIM50       | ENSG00000146755 | 1082  | 0.24 | 0.21 | 0.78 | 0.031   | NA |
| chr7 | 94953769  | 94953971  | PON1         | ENSG00000005421 | -82   | 0.71 | 0.79 | 0.78 | -0.08   | NA |
| chr7 | 231272    | 231539    | AC145676.2   | ENSG00000249852 | -1848 | 0.92 | 0.9  | 0.79 | 0.026   | NA |
| chr7 | 76026790  | 76027223  | ZP3          | ENSG00000188372 | 171   | 0.23 | 0.25 | 0.79 | -0.029  | NA |
| chr7 | 76750995  | 76751394  | FAM185BP     | ENSG00000214439 | 239   | 0.09 | 0.08 | 0.79 | 0.018   | NA |
| chr7 | 100076454 | 100076785 | TSC22D4      | ENSG00000166925 | 173   | 0.27 | 0.24 | 0.79 | 0.027   | NA |
| chr7 | 5085411   | 5086342   | RBAK         | ENSG00000146587 | 424   | 0.22 | 0.2  | 0.8  | 0.012   | NA |
| chr7 | 82072021  | 82073520  | CACNA2D1     | ENSG00000153956 | 261   | 0.21 | 0.23 | 0.8  | -0.013  | NA |
| chr7 | 1131625   | 1133187   | GPER         | ENSG00000164850 | -168  | 0.91 | 0.9  | 0.81 | 0.009   | NA |
| chr7 | 53103275  | 53103801  | POM121L12    | ENSG00000221900 | 203   | 0.98 | 0.97 | 0.81 | 0.013   | NA |
| chr7 | 64498577  | 64498930  | CCT6P3       | ENSG00000234585 | 21    | 0.17 | 0.25 | 0.81 | -0.077  | NA |
| chr7 | 97840559  | 97840845  | BHLHA15      | ENSG00000180535 | -864  | 0.18 | 0.17 | 0.81 | 0.016   | NA |
| chr7 | 134143115 | 134144063 | AKR1B1       | ENSG00000085662 | 261   | 0.19 | 0.2  | 0.81 | -0.011  | NA |
| chr7 | 140623997 | 140624949 | BRAF         | ENSG00000157764 | -15   | 0.2  | 0.21 | 0.81 | -0.0092 | NA |
| chr7 | 22396039  | 22396852  | RAPGEF5      | ENSG00000136237 | 84    | 0.19 | 0.2  | 0.82 | -0.011  | NA |
| chr7 | 27154999  | 27155426  | AC004080.12  | ENSG00000253552 | 188   | 0.26 | 0.24 | 0.82 | 0.024   | NA |
| chr7 | 73703458  | 73704127  | CLIP2        | ENSG00000106665 | -11   | 0.22 | 0.26 | 0.82 | -0.041  | NA |
| chr7 | 99746253  | 99746643  | C7orf59      | ENSG00000188186 | -82   | 0.2  | 0.27 | 0.82 | -0.076  | NA |
| chr7 | 106809461 | 106809815 | HBP1         | ENSG00000105856 | 178   | 0.4  | 0.35 | 0.82 | 0.05    | NA |
| chr7 | 2883438   | 2884314   | GNA12        | ENSG00000146535 | -226  | 0.2  | 0.19 | 0.83 | 0.011   | NA |
| chr7 | 5521368   | 5521615   | AC092171.1   | ENSG00000203571 | -1318 | 0.94 | 0.96 | 0.83 | -0.02   | NA |
| chr7 | 6120829   | 6121398   | AC004895.4   | ENSG00000231704 | -189  | 0.14 | 0.12 | 0.83 | 0.015   | NA |

|      |           |           |               |                 |       |      |      |      |         |    |
|------|-----------|-----------|---------------|-----------------|-------|------|------|------|---------|----|
| chr7 | 42276003  | 42277850  | GLI3          | ENSG00000106571 | -314  | 0.19 | 0.18 | 0.83 | 0.0066  | NA |
| chr7 | 55433147  | 55434271  | LANCL2        | ENSG00000132434 | -95   | 0.21 | 0.22 | 0.83 | -0.0091 | NA |
| chr7 | 56515585  | 56515864  | RP13-492C18.2 | ENSG00000237268 | 344   | 0.27 | 0.29 | 0.83 | -0.019  | NA |
| chr7 | 137686291 | 137687056 | CREB3L2       | ENSG00000182158 | -100  | 0.2  | 0.22 | 0.83 | -0.017  | NA |
| chr7 | 148395430 | 148397002 | CUL1          | ENSG00000055130 | 283   | 0.19 | 0.2  | 0.83 | -0.0055 | NA |
| chr7 | 150101906 | 150102968 | ZNF775        | ENSG00000196456 | 485   | 0.22 | 0.24 | 0.83 | -0.014  | NA |
| chr7 | 4876024   | 4876229   | RADIL         | ENSG00000157927 | -1269 | 0.97 | 0.96 | 0.84 | 0.013   | NA |
| chr7 | 5642948   | 5643184   | FSCN1         | ENSG00000075618 | -493  | 0.92 | 0.94 | 0.84 | -0.02   | NA |
| chr7 | 44646065  | 44646823  | OGDH          | ENSG00000105953 | 273   | 0.18 | 0.18 | 0.84 | -0.0094 | NA |
| chr7 | 54614052  | 54614797  | VSTM2A        | ENSG00000170419 | 59    | 0.19 | 0.21 | 0.84 | -0.012  | NA |
| chr7 | 148936618 | 148937330 | ZNF212        | ENSG00000170260 | 232   | 0.26 | 0.2  | 0.84 | 0.06    | NA |
| chr7 | 100895202 | 100895805 | FIS1          | ENSG00000214253 | -89   | 0.17 | 0.22 | 0.85 | -0.048  | NA |
| chr7 | 6048396   | 6049255   | PMS2          | ENSG00000122512 | -175  | 0.2  | 0.21 | 0.86 | -0.011  | NA |
| chr7 | 6590563   | 6590957   | GRID2IP       | ENSG00000215045 | 307   | 0.9  | 0.91 | 0.86 | -0.01   | NA |
| chr7 | 23508184  | 23509712  | IGF2BP3       | ENSG00000136231 | 173   | 0.25 | 0.24 | 0.86 | 0.009   | NA |
| chr7 | 44162850  | 44163720  | POLD2         | ENSG00000106628 | -190  | 0.25 | 0.23 | 0.86 | 0.019   | NA |
| chr7 | 62858468  | 62858826  | RP11-340I6.2  | ENSG00000234467 | 223   | 1    | 0.62 | 0.86 | 0.38    | NA |
| chr7 | 66461857  | 66462107  | TYW1          | ENSG00000198874 | 115   | 0.21 | 0.17 | 0.86 | 0.044   | NA |
| chr7 | 72984990  | 72985208  | TBL2          | ENSG00000106638 | 625   | 0.97 | 0.94 | 0.86 | 0.032   | NA |
| chr7 | 74987976  | 74988921  | PMS2P2        | ENSG00000174368 | -235  | 0.33 | 0.24 | 0.86 | 0.095   | NA |
| chr7 | 94139031  | 94139949  | CASD1         | ENSG00000127995 | 380   | 0.17 | 0.15 | 0.86 | 0.02    | NA |
| chr7 | 99102154  | 99102968  | ZKSCAN5       | ENSG00000196652 | 287   | 0.22 | 0.2  | 0.86 | 0.016   | NA |
| chr7 | 99698173  | 99699646  | MCM7          | ENSG00000166508 | -529  | 0.18 | 0.18 | 0.86 | 0.0046  | NA |
| chr7 | 129422997 | 129423355 | RP11-738B7.1  | ENSG00000242078 | 1849  | 0.27 | 0.26 | 0.86 | 0.013   | NA |
| chr7 | 149194139 | 149195275 | ZNF746        | ENSG00000181220 | 117   | 0.25 | 0.26 | 0.86 | -0.01   | NA |
| chr7 | 855308    | 856747    | SUN1          | ENSG00000164828 | 499   | 0.2  | 0.19 | 0.87 | 0.0086  | NA |
| chr7 | 35076136  | 35077808  | DPY19L1       | ENSG00000173852 | 681   | 0.19 | 0.19 | 0.87 | 0.007   | NA |
| chr7 | 44104746  | 44105116  | PGAM2         | ENSG00000164708 | 255   | 0.25 | 0.29 | 0.87 | -0.041  | NA |
| chr7 | 51454273  | 51454504  | CTD-2021A8.2  | ENSG00000228897 | 410   | 0.94 | 0.97 | 0.87 | -0.029  | NA |
| chr7 | 65215732  | 65216495  | CCT6P1        | ENSG00000228409 | -16   | 0.15 | 0.19 | 0.87 | -0.038  | NA |

|      |           |           |               |                 |       |      |      |      |         |    |
|------|-----------|-----------|---------------|-----------------|-------|------|------|------|---------|----|
| chr7 | 72568756  | 72569128  | RP11-396K3.1  | ENSG00000233369 | -91   | 0.17 | 0.06 | 0.87 | 0.1     | NA |
| chr7 | 129251237 | 129252441 | NRF1          | ENSG00000106459 | 284   | 0.17 | 0.18 | 0.87 | -0.0079 | NA |
| chr7 | 143598867 | 143599426 | FAM115A       | ENSG00000198420 | 73    | 0.24 | 0.26 | 0.87 | -0.019  | NA |
| chr7 | 97910459  | 97911618  | BRI3          | ENSG00000164713 | 59    | 0.2  | 0.21 | 0.88 | -0.0083 | NA |
| chr7 | 6413934   | 6414720   | RAC1          | ENSG00000136238 | 173   | 0.16 | 0.15 | 0.88 | 0.0064  | NA |
| chr7 | 148892424 | 148892837 | ZNF282        | ENSG00000170265 | 76    | 0.15 | 0.17 | 0.88 | -0.021  | NA |
| chr7 | 1978698   | 1978934   | MAD1L1        | ENSG00000002822 | 1369  | 0.94 | 0.95 | 0.89 | -0.011  | NA |
| chr7 | 27779566  | 27780601  | TAX1BP1       | ENSG00000106052 | 369   | 0.21 | 0.19 | 0.89 | 0.016   | NA |
| chr7 | 73245434  | 73246045  | CLDN4         | ENSG00000189143 | 410   | 0.87 | 0.85 | 0.89 | 0.015   | NA |
| chr7 | 150756391 | 150756659 | SLC4A2        | ENSG00000164889 | -132  | 0.23 | 0.2  | 0.89 | 0.026   | NA |
| chr7 | 3340354   | 3341216   | SDK1          | ENSG00000146555 | -295  | 0.18 | 0.19 | 0.9  | -0.0052 | NA |
| chr7 | 29724188  | 29725436  | AC007255.7    | ENSG00000225264 | -58   | 0.26 | 0.27 | 0.9  | -0.011  | NA |
| chr7 | 30323917  | 30325641  | ZNRF2         | ENSG00000180233 | 856   | 0.18 | 0.17 | 0.9  | 0.0056  | NA |
| chr7 | 64601085  | 64601891  | INTS4L1       | ENSG00000164669 | -115  | 0.5  | 0.37 | 0.9  | 0.13    | NA |
| chr7 | 73668393  | 73669142  | RFC2          | ENSG00000049541 | -128  | 0.21 | 0.22 | 0.9  | -0.006  | NA |
| chr7 | 100303014 | 100304079 | POP7          | ENSG00000172336 | -130  | 0.16 | 0.16 | 0.9  | 0.0046  | NA |
| chr7 | 116311824 | 116312598 | MET           | ENSG00000105976 | -37   | 0.15 | 0.16 | 0.9  | -0.0095 | NA |
| chr7 | 39649253  | 39649510  | AC004837.3    | ENSG00000106540 | 65    | 0.29 | 0.28 | 0.91 | 0.011   | NA |
| chr7 | 55086141  | 55088105  | EGFR          | ENSG00000146648 | 409   | 0.19 | 0.19 | 0.91 | 0.0031  | NA |
| chr7 | 96635458  | 96635749  | DLX6          | ENSG00000006377 | -202  | 0.12 | 0.17 | 0.91 | -0.046  | NA |
| chr7 | 130080527 | 130081067 | TSGA14        | ENSG00000106477 | -108  | 0.17 | 0.16 | 0.91 | 0.0095  | NA |
| chr7 | 39872841  | 39873151  | AC004987.9    | ENSG00000233225 | -174  | 0.16 | 0.17 | 0.92 | -0.0086 | NA |
| chr7 | 150819919 | 150820764 | AGAP3         | ENSG00000133612 | -368  | 0.91 | 0.91 | 0.92 | 0.0052  | NA |
| chr7 | 149494    | 150038    | AC093627.10   | ENSG00000240859 | 169   | 0.13 | 0.15 | 0.93 | -0.021  | NA |
| chr7 | 4681433   | 4682117   | FOXP1         | ENSG00000164916 | -1613 | 0.16 | 0.17 | 0.93 | -0.0054 | NA |
| chr7 | 5229657   | 5230341   | WIPI2         | ENSG00000157954 | 180   | 0.15 | 0.15 | 0.93 | -0.0049 | NA |
| chr7 | 104653119 | 104654966 | RP11-325F22.3 | ENSG00000228393 | -571  | 0.24 | 0.25 | 0.93 | -0.0049 | NA |
| chr7 | 157647800 | 157648007 | AC011899.9    | ENSG00000233038 | 411   | 0.96 | 0.94 | 0.93 | 0.016   | NA |
| chr7 | 808543    | 808835    | HEATR2        | ENSG00000164818 | 577   | 0.14 | 0.17 | 0.94 | -0.032  | NA |
| chr7 | 1513775   | 1514052   | INTS1         | ENSG00000164880 | -1127 | 0.57 | 0.55 | 0.94 | 0.025   | NA |

|      |           |           |               |                 |       |      |      |      |         |    |
|------|-----------|-----------|---------------|-----------------|-------|------|------|------|---------|----|
| chr7 | 8008097   | 8009495   | GLCC1         | ENSG00000106415 | 371   | 0.15 | 0.16 | 0.94 | -0.0027 | NA |
| chr7 | 30721372  | 30722445  | CRHR2         | ENSG00000106113 | -12   | 0.27 | 0.26 | 0.94 | 0.0065  | NA |
| chr7 | 77166610  | 77167337  | PTPN12        | ENSG00000127947 | 139   | 0.21 | 0.21 | 0.94 | 0.0062  | NA |
| chr7 | 139762255 | 139763245 | PARP12        | ENSG00000059378 | -399  | 0.19 | 0.2  | 0.94 | -0.0037 | NA |
| chr7 | 886803    | 887535    | SUN1          | ENSG00000164828 | -972  | 0.99 | 0.98 | 0.95 | 0.01    | NA |
| chr7 | 27224267  | 27224596  | HOXA11-AS1    | ENSG00000240990 | 141   | 0.22 | 0.3  | 0.95 | -0.074  | NA |
| chr7 | 30634124  | 30635058  | GARS          | ENSG00000106105 | 294   | 0.19 | 0.18 | 0.95 | 0.0059  | NA |
| chr7 | 54609734  | 54610140  | VSTM2A        | ENSG00000170419 | -81   | 0.16 | 0.17 | 0.95 | -0.015  | NA |
| chr7 | 131240513 | 131241847 | PODXL         | ENSG00000128567 | 142   | 0.2  | 0.19 | 0.95 | 0.0047  | NA |
| chr7 | 138144667 | 138146023 | TRIM24        | ENSG00000122779 | 392   | 0.17 | 0.16 | 0.95 | 0.0032  | NA |
| chr7 | 155088705 | 155090212 | INSIG1        | ENSG00000186480 | -28   | 0.17 | 0.17 | 0.95 | 0.0036  | NA |
| chr7 | 2281362   | 2282105   | FTSJ2         | ENSG00000122687 | 71    | 0.23 | 0.22 | 0.96 | 0.0064  | NA |
| chr7 | 32110063  | 32110910  | PDE1C         | ENSG00000154678 | -25   | 0.19 | 0.19 | 0.96 | -0.004  | NA |
| chr7 | 48128046  | 48128499  | UPP1          | ENSG00000183696 | 47    | 0.24 | 0.25 | 0.96 | -0.0089 | NA |
| chr7 | 64541192  | 64541752  | AC073210.1    | ENSG00000245043 | 169   | 0.17 | 0.18 | 0.96 | -0.0084 | NA |
| chr7 | 148787421 | 148788601 | ZNF786        | ENSG00000197362 | -214  | 0.22 | 0.23 | 0.96 | -0.0032 | NA |
| chr7 | 39605776  | 39606376  | AC011290.4    | ENSG00000227172 | -238  | 0.16 | 0.15 | 0.97 | 0.008   | NA |
| chr7 | 101005899 | 101007443 | EMID2         | ENSG00000160963 | 570   | 0.21 | 0.21 | 0.97 | 0.0032  | NA |
| chr7 | 127983683 | 127984096 | RBM28         | ENSG00000106344 | 35    | 0.28 | 0.28 | 0.97 | 0.008   | NA |
| chr7 | 143533841 | 143534552 | RP11-61L23.2  | ENSG00000253882 | -170  | 0.17 | 0.14 | 0.97 | 0.028   | NA |
| chr7 | 150923880 | 150924536 | ABCF2         | ENSG00000033050 | -164  | 0.16 | 0.16 | 0.97 | 0.0053  | NA |
| chr7 | 27208871  | 27209616  | RP1-170O19.21 | ENSG00000257667 | -180  | 0.46 | 0.46 | 0.98 | 0.0056  | NA |
| chr7 | 69062374  | 69065037  | RP5-942I16.1  | ENSG00000234215 | -1271 | 0.18 | 0.18 | 0.98 | 0.0016  | NA |
| chr7 | 72298512  | 72298988  | TYW1B         | ENSG00000254184 | -96   | 0.24 | 0.23 | 0.98 | 0.0076  | NA |
| chr7 | 149416662 | 149416974 | KRBA1         | ENSG00000133619 | 88    | 1    | 0.97 | 0.98 | 0.029   | NA |
| chr7 | 1084387   | 1084595   | GPR146        | ENSG00000164849 | 250   | 0.17 | 0.18 | 0.99 | -0.0061 | NA |
| chr7 | 5886992   | 5887483   | ZNF815        | ENSG00000235944 | 284   | 0.89 | 1    | 0.99 | -0.11   | NA |
| chr7 | 284872    | 285161    | FAM20C        | ENSG00000177706 | -845  | 0.96 | 1    | 1    | -0.043  | NA |
| chr7 | 915753    | 916644    | GET4          | ENSG00000239857 | 9     | 0.18 | 0.18 | 1    | -0.0024 | NA |
| chr7 | 930913    | 931215    | GET4          | ENSG00000239857 | -873  | 0.86 | 0.88 | 1    | -0.014  | NA |

|      |          |          |              |                 |       |      |      |   |         |    |
|------|----------|----------|--------------|-----------------|-------|------|------|---|---------|----|
| chr7 | 1024606  | 1024894  | CYP2W1       | ENSG00000073067 | -1287 | 0.95 | 0.95 | 1 | -0.0006 | NA |
| chr7 | 1062496  | 1062966  | MIR339       | ENSG00000199023 | -69   | 1    | 1    | 1 | 0       | NA |
| chr7 | 1575736  | 1575993  | MAFK         | ENSG00000198517 | -1259 | 0.79 | 1    | 1 | -0.21   | NA |
| chr7 | 1885033  | 1885402  | AC110781.3   | ENSG00000176349 | 281   | 1    | 0.98 | 1 | 0.016   | NA |
| chr7 | 2419808  | 2420340  | EIF3B        | ENSG00000106263 | 1752  | 0.91 | 0.91 | 1 | -0.0026 | NA |
| chr7 | 3341450  | 3341733  | SDK1         | ENSG00000146555 | 372   | 0.18 | 0.17 | 1 | 0.0012  | NA |
| chr7 | 5267748  | 5268110  | WIPI2        | ENSG00000157954 | -1110 | 0.96 | 1    | 1 | -0.039  | NA |
| chr7 | 5338674  | 5339002  | SLC29A4      | ENSG00000164638 | -122  | 0.81 | 0.83 | 1 | -0.026  | NA |
| chr7 | 5372280  | 5372717  | TNRC18       | ENSG00000182095 | 11    | 0.94 | 0.94 | 1 | -0.0036 | NA |
| chr7 | 5534384  | 5534766  | MIR589       | ENSG00000207973 | 973   | 0.21 | 0.17 | 1 | 0.041   | NA |
| chr7 | 5539957  | 5541567  | FBXL18       | ENSG00000155034 | -135  | 0.96 | 0.96 | 1 | 0.001   | NA |
| chr7 | 6144047  | 6144469  | USP42        | ENSG00000106346 | -257  | 0.18 | 0.13 | 1 | 0.051   | NA |
| chr7 | 6616918  | 6617277  | ZDHHC4       | ENSG00000136247 | 32    | 0.27 | 0.28 | 1 | -0.0055 | NA |
| chr7 | 6865701  | 6866094  | C7orf28B     | ENSG00000146574 | -71   | 1    | 1    | 1 | 0       | NA |
| chr7 | 9765661  | 9766215  | AC060834.2   | ENSG00000197320 | 68    | 0.98 | 0.97 | 1 | 0.0055  | NA |
| chr7 | 12610165 | 12610834 | SCIN         | ENSG00000006747 | 296   | 0.22 | 0.22 | 1 | 0.00096 | NA |
| chr7 | 14029378 | 14029593 | ETV1         | ENSG00000006468 | 86    | 0.25 | 0.26 | 1 | -0.0012 | NA |
| chr7 | 16626148 | 16626531 | AC005014.5   | ENSG00000224280 | 43    | 1    | 1    | 1 | 0       | NA |
| chr7 | 23695159 | 23695374 | AC006026.12  | ENSG00000228953 | -35   | 0.94 | 0.86 | 1 | 0.082   | NA |
| chr7 | 26437727 | 26438715 | AC004540.5   | ENSG00000214870 | 8     | 0.24 | 0.24 | 1 | 0.002   | NA |
| chr7 | 27143181 | 27143479 | HOXA2        | ENSG00000105996 | -900  | 0.16 | 0.14 | 1 | 0.018   | NA |
| chr7 | 33148607 | 33149317 | RP9          | ENSG00000164610 | -22   | 0.16 | 0.16 | 1 | -0.0019 | NA |
| chr7 | 35225363 | 35226580 | DPY19L2P1    | ENSG00000189212 | -318  | 0.18 | 0.17 | 1 | 0.0044  | NA |
| chr7 | 43768814 | 43769479 | C7orf44      | ENSG00000106603 | -95   | 0.21 | 0.21 | 1 | -0.0017 | NA |
| chr7 | 44121856 | 44122662 | POLM         | ENSG00000122678 | -196  | 0.26 | 0.26 | 1 | -0.0037 | NA |
| chr7 | 50342895 | 50343456 | IKZF1        | ENSG00000185811 | -545  | 0.38 | 0.39 | 1 | -0.0087 | NA |
| chr7 | 51456541 | 51456834 | CTD-2021A8.3 | ENSG00000227080 | 124   | 0.99 | 0.99 | 1 | -0.0074 | NA |
| chr7 | 56183577 | 56184165 | RP4-725G10.1 | ENSG00000185290 | 222   | 0.25 | 0.25 | 1 | 0.0012  | NA |
| chr7 | 62810043 | 62810401 | RP5-905H7.10 | ENSG00000227545 | 215   | 1    | 1    | 1 | 0       | NA |
| chr7 | 62814101 | 62814402 | RP5-905H7.7  | ENSG00000227923 | -160  | 1    | 0.75 | 1 | 0.25    | NA |

|      |           |           |               |                 |       |      |      |   |         |    |
|------|-----------|-----------|---------------|-----------------|-------|------|------|---|---------|----|
| chr7 | 63361126  | 63361493  | RP11-340I6.8  | ENSG00000226581 | 108   | 0.27 | 0.26 | 1 | 0.0082  | NA |
| chr7 | 63505977  | 63506298  | RP11-3N2.13   | ENSG00000214652 | 316   | 0.21 | 0.2  | 1 | 0.013   | NA |
| chr7 | 64197040  | 64197246  | RP11-416N13.1 | ENSG00000224172 | -22   | 0.98 | 0.97 | 1 | 0.0068  | NA |
| chr7 | 64535252  | 64535630  | RP11-460N20.4 | ENSG00000227113 | 40    | 0.96 | 0.95 | 1 | 0.0092  | NA |
| chr7 | 65338006  | 65338212  | VKORC1L1      | ENSG00000196715 | -145  | 0.22 | 0.2  | 1 | 0.011   | NA |
| chr7 | 65540543  | 65541104  | ASL           | ENSG00000126522 | 38    | 0.22 | 0.22 | 1 | 0.0042  | NA |
| chr7 | 65579764  | 65580200  | CRCP          | ENSG00000241258 | 169   | 0.15 | 0.16 | 1 | -0.0089 | NA |
| chr7 | 66309503  | 66310040  | RP11-792A8.2  | ENSG00000230583 | 42    | 0.2  | 0.2  | 1 | 0.004   | NA |
| chr7 | 66460112  | 66460803  | TYW1          | ENSG00000198874 | 297   | 0.22 | 0.22 | 1 | 0.0049  | NA |
| chr7 | 72424803  | 72425472  | NSUN5P2       | ENSG00000106133 | 115   | 0.27 | 0.3  | 1 | -0.025  | NA |
| chr7 | 72439687  | 72440646  | TRIM74        | ENSG00000155428 | -169  | 0.67 | 0.67 | 1 | -0.0001 | NA |
| chr7 | 73081843  | 73082705  | VPS37D        | ENSG00000176428 | 119   | 0.19 | 0.2  | 1 | -0.0014 | NA |
| chr7 | 73097126  | 73098263  | WBSCR22       | ENSG00000071462 | 339   | 0.22 | 0.22 | 1 | 0.00049 | NA |
| chr7 | 75039434  | 75040103  | NSUN5P1       | ENSG00000223705 | 163   | 0.2  | 0.23 | 1 | -0.027  | NA |
| chr7 | 77165936  | 77166255  | PTPN12        | ENSG00000127947 | -497  | 0.2  | 0.17 | 1 | 0.033   | NA |
| chr7 | 86415620  | 86416112  | AC005009.2    | ENSG00000233073 | 42    | 1    | 1    | 1 | 0       | NA |
| chr7 | 86974740  | 86975088  | TP53TG1       | ENSG00000182165 | -112  | 0.19 | 0.19 | 1 | 0.0036  | NA |
| chr7 | 87104723  | 87105305  | ABCB4         | ENSG00000005471 | -233  | 0.29 | 0.31 | 1 | -0.02   | NA |
| chr7 | 91509997  | 91510427  | CTB-104F4.2   | ENSG00000242870 | -208  | 0.22 | 0.25 | 1 | -0.026  | NA |
| chr7 | 94293609  | 94293864  | PEG10         | ENSG00000242265 | -311  | 0.99 | 0.99 | 1 | 0.001   | NA |
| chr7 | 95401691  | 95402432  | DYNC111       | ENSG00000158560 | 195   | 0.17 | 0.16 | 1 | 0.0011  | NA |
| chr7 | 97567894  | 97568129  | AC079781.8    | ENSG00000232097 | 95    | 0.95 | 1    | 1 | -0.046  | NA |
| chr7 | 97839862  | 97840222  | BHLHA15       | ENSG00000180535 | -1524 | 0.27 | 0.27 | 1 | -0.0032 | NA |
| chr7 | 97841636  | 97842005  | BHLHA15       | ENSG00000180535 | 254   | 0.94 | 0.94 | 1 | -0.004  | NA |
| chr7 | 98476004  | 98476954  | TRRAP         | ENSG00000196367 | 366   | 0.17 | 0.17 | 1 | -0.001  | NA |
| chr7 | 98609669  | 98610059  | AC004893.11   | ENSG00000242687 | -924  | 0.98 | 0.97 | 1 | 0.0077  | NA |
| chr7 | 99149508  | 99149807  | FAM200A       | ENSG00000221909 | 100   | 0.25 | 0.27 | 1 | -0.015  | NA |
| chr7 | 99774733  | 99775583  | GPC2          | ENSG00000213420 | -168  | 0.16 | 0.16 | 1 | 0.0023  | NA |
| chr7 | 100230649 | 100231320 | TFR2          | ENSG00000106327 | -271  | 0.28 | 0.27 | 1 | 0.017   | NA |
| chr7 | 100484425 | 100484651 | SRRT          | ENSG00000087087 | -85   | 0.85 | 1    | 1 | -0.15   | NA |

|      |           |           |               |                 |       |      |      |    |         |    |
|------|-----------|-----------|---------------|-----------------|-------|------|------|----|---------|----|
| chr7 | 100489981 | 100490365 | ACHE          | ENSG00000087085 | 1681  | 0.96 | 0.96 | 1  | 0.0019  | NA |
| chr7 | 100490862 | 100491203 | ACHE          | ENSG00000087085 | 822   | 0.91 | 0.93 | 1  | -0.021  | NA |
| chr7 | 100860297 | 100861029 | PLOD3         | ENSG00000106397 | 206   | 0.15 | 0.15 | 1  | 0.0016  | NA |
| chr7 | 102212867 | 102213262 | POLR2J3       | ENSG00000168255 | -147  | 0.1  | 0.11 | 1  | -0.015  | NA |
| chr7 | 108166211 | 108167077 | PNPLA8        | ENSG00000135241 | -129  | 0.18 | 0.18 | 1  | -0.0058 | NA |
| chr7 | 108209784 | 108210906 | THAP5         | ENSG00000177683 | -448  | 0.17 | 0.17 | 1  | -0.0018 | NA |
| chr7 | 119912840 | 119913883 | KCND2         | ENSG00000184408 | -361  | 0.26 | 0.27 | 1  | -0.0074 | NA |
| chr7 | 119915062 | 119915485 | KCND2         | ENSG00000184408 | 1551  | 0.98 | 1    | 1  | -0.023  | NA |
| chr7 | 120969587 | 120970743 | WNT16         | ENSG00000002745 | 862   | 0.17 | 0.33 | 1  | -0.17   | NA |
| chr7 | 121945345 | 121946235 | RP11-560I19.4 | ENSG00000230316 | 786   | 0.18 | 0.18 | 1  | -0.0011 | NA |
| chr7 | 127225200 | 127225950 | GCC1          | ENSG00000179562 | 86    | 0.26 | 0.26 | 1  | 0.0018  | NA |
| chr7 | 128550409 | 128550903 | KCP           | ENSG00000135253 | 117   | 0.34 | 0.36 | 1  | -0.026  | NA |
| chr7 | 129690960 | 129691326 | ZC3HC1        | ENSG00000091732 | 66    | 0.2  | 0.2  | 1  | 0.0013  | NA |
| chr7 | 130021511 | 130021726 | CPA1          | ENSG00000091704 | 684   | 0.96 | 0.96 | 1  | 0.0041  | NA |
| chr7 | 135194567 | 135195309 | CNOT4         | ENSG00000080802 | -252  | 0.26 | 0.26 | 1  | 0.0039  | NA |
| chr7 | 136849054 | 136849346 | AC009264.1    | ENSG00000234352 | -112  | 0.98 | 0.98 | 1  | -0.0077 | NA |
| chr7 | 138666358 | 138666972 | KIAA1549      | ENSG00000122778 | -601  | 0.24 | 0.22 | 1  | 0.02    | NA |
| chr7 | 139992321 | 139992574 | RP11-785H2.1  | ENSG00000241661 | -105  | 1    | 1    | 1  | 0       | NA |
| chr7 | 140178289 | 140179467 | MKRN1         | ENSG00000133606 | -575  | 0.23 | 0.22 | 1  | 0.0048  | NA |
| chr7 | 143317293 | 143318004 | FAM115C       | ENSG00000170379 | -395  | 1    | 1    | 1  | 0       | NA |
| chr7 | 150710349 | 150711333 | NOS3          | ENSG00000164867 | 435   | 0.17 | 0.17 | 1  | 0.00061 | NA |
| chr7 | 150974116 | 150974535 | SMARCD3       | ENSG00000082014 | 213   | 0.19 | 0.18 | 1  | 0.011   | NA |
| chr7 | 151722590 | 151723241 | GALNT11       | ENSG00000178234 | 156   | 0.15 | 0.15 | 1  | 0.002   | NA |
| chr7 | 156760878 | 156761236 | NOM1          | ENSG00000146909 | -392  | 0.94 | 1    | 1  | -0.056  | NA |
| chr7 | 158621005 | 158622747 | ESYT2         | ENSG00000117868 | 287   | 0.15 | 0.15 | 1  | #####   | NA |
| chr7 | 973189    | 973888    | ADAP1         | ENSG00000105963 | 1278  | 1    | NA   | NA | NA      | NA |
| chr7 | 1491773   | 1491975   | MICALL2       | ENSG00000164877 | -1702 | 0.54 | NA   | NA | NA      | NA |
| chr7 | 2019763   | 2020100   | MAD1L1        | ENSG00000002822 | 443   | 1    | NA   | NA | NA      | NA |
| chr7 | 5601802   | 5602129   | ACTB          | ENSG00000075624 | 456   | 0.33 | NA   | NA | NA      | NA |
| chr7 | 6803483   | 6803750   | RSPH10B2      | ENSG00000169402 | 61    | 1    | NA   | NA | NA      | NA |

|      |           |           |               |                 |      |      |      |    |    |    |
|------|-----------|-----------|---------------|-----------------|------|------|------|----|----|----|
| chr7 | 12443163  | 12443705  | VWDE          | ENSG00000146530 | -84  | 0.17 | NA   | NA | NA | NA |
| chr7 | 16684665  | 16684907  | ANKMY2        | ENSG00000106524 | 501  | 0.29 | NA   | NA | NA | NA |
| chr7 | 19748397  | 19748861  | TWISTNB       | ENSG00000105849 | 81   | 0.58 | NA   | NA | NA | NA |
| chr7 | 19812569  | 19813005  | TMEM196       | ENSG00000173452 | 30   | NA   | 1    | NA | NA | NA |
| chr7 | 22862400  | 22862624  | TOMM7         | ENSG00000196683 | -102 | 0.33 | NA   | NA | NA | NA |
| chr7 | 23530434  | 23530690  | RPS2P32       | ENSG00000232818 | 470  | 1    | NA   | NA | NA | NA |
| chr7 | 27702220  | 27702851  | HIBADH        | ENSG00000106049 | -59  | 0.44 | NA   | NA | NA | NA |
| chr7 | 29688911  | 29689357  | AC007276.5    | ENSG00000227855 | -709 | NA   | 1    | NA | NA | NA |
| chr7 | 44259669  | 44259923  | CAMK2B        | ENSG00000058404 | 756  | 1    | NA   | NA | NA | NA |
| chr7 | 44788177  | 44788440  | ZMIZ2         | ENSG00000122515 | 128  | NA   | 0.18 | NA | NA | NA |
| chr7 | 50861390  | 50861638  | GRB10         | ENSG00000106070 | -355 | NA   | 1    | NA | NA | NA |
| chr7 | 53254982  | 53255204  | RP11-266F12.1 | ENSG00000227344 | 12   | 0.98 | NA   | NA | NA | NA |
| chr7 | 57087667  | 57088017  | RP11-220H4.1  | ENSG00000214668 | 138  | 1    | NA   | NA | NA | NA |
| chr7 | 62854467  | 62854768  | RP11-73B2.3   | ENSG00000223889 | -130 | 1    | NA   | NA | NA | NA |
| chr7 | 63767750  | 63767991  | ZNF736        | ENSG00000234444 | 33   | 0.25 | NA   | NA | NA | NA |
| chr7 | 64838984  | 64839213  | ZNF92         | ENSG00000146757 | 304  | 0.5  | NA   | NA | NA | NA |
| chr7 | 65112260  | 65113234  | INTS4L2       | ENSG00000232270 | -30  | NA   | 1    | NA | NA | NA |
| chr7 | 72711622  | 72712080  | POM121B       | ENSG00000205578 | 924  | NA   | 0.5  | NA | NA | NA |
| chr7 | 73256704  | 73256926  | WBSCR27       | ENSG00000165171 | 31   | 0.13 | NA   | NA | NA | NA |
| chr7 | 74070951  | 74071154  | GTF2I         | ENSG00000077809 | -942 | 1    | NA   | NA | NA | NA |
| chr7 | 74867531  | 74867901  | GATSL2        | ENSG00000198750 | -375 | NA   | 1    | NA | NA | NA |
| chr7 | 79081565  | 79081879  | AC004945.2    | ENSG00000234456 | -476 | 0.12 | NA   | NA | NA | NA |
| chr7 | 89975785  | 89976027  | GTPBP10       | ENSG00000105793 | -43  | NA   | 1    | NA | NA | NA |
| chr7 | 96653467  | 96654199  | DLX5          | ENSG00000105880 | 306  | 0.14 | NA   | NA | NA | NA |
| chr7 | 102134158 | 102134405 | RASA4B        | ENSG00000170667 | -523 | 0.91 | NA   | NA | NA | NA |
| chr7 | 102134871 | 102135575 | RASA4B        | ENSG00000170667 | 46   | 0.95 | NA   | NA | NA | NA |
| chr7 | 102234040 | 102234744 | RASA4         | ENSG00000105808 | 46   | NA   | 1    | NA | NA | NA |
| chr7 | 102251470 | 102251827 | RASA4         | ENSG00000105808 | 390  | 1    | NA   | NA | NA | NA |
| chr7 | 102311947 | 102312332 | POLR2J2       | ENSG00000228049 | -91  | 0.48 | NA   | NA | NA | NA |
| chr7 | 102329950 | 102330654 | RP11-577H5.2  | ENSG00000233297 | 614  | NA   | 1    | NA | NA | NA |



|      |           |           |               |                 |       |      |      |          |      |    |
|------|-----------|-----------|---------------|-----------------|-------|------|------|----------|------|----|
| chr7 | 102389480 | 102390092 | FAM185A       | ENSG00000222011 | 302   | NA   | 0.33 | NA       | NA   | NA |
| chr7 | 104885049 | 104885400 | RP4-778K6.1   | ENSG00000213361 | 125   | 0.94 | NA   | NA       | NA   | NA |
| chr7 | 134918319 | 134918654 | STRA8         | ENSG00000146857 | 1755  | 1    | NA   | NA       | NA   | NA |
| chr7 | 138348962 | 138349444 | SVOPL         | ENSG00000157703 | -234  | 0.22 | NA   | NA       | NA   | NA |
| chr7 | 149469542 | 149469748 | ZNF467        | ENSG00000181444 | 663   | 1    | NA   | NA       | NA   | NA |
| chr7 | 157206934 | 157207348 | DNAJB6        | ENSG00000105993 | -958  | 0.94 | NA   | NA       | NA   | NA |
| chr8 | 74658490  | 74659828  | STAU2         | ENSG00000040341 | -106  | 0.34 | 0.16 | 4.40E-09 | 0.18 | NA |
| chr8 | 143807788 | 143809310 | CTD-2292P10.4 | ENSG00000253741 | -158  | 0.43 | 0.18 | 4.90E-09 | 0.25 | NA |
| chr8 | 82542798  | 82543475  | IMPA1P        | ENSG00000251521 | 233   | 0.92 | 0.23 | 9.20E-09 | 0.69 | NA |
| chr8 | 1764328   | 1765171   | MIR596        | ENSG00000207826 | -648  | 0.91 | 0.19 | 1.20E-08 | 0.72 | NA |
| chr8 | 120428398 | 120429178 | NOV           | ENSG00000136999 | 242   | 0.51 | 0.12 | 1.80E-08 | 0.39 | NA |
| chr8 | 145772645 | 145773966 | AC084125.1    | ENSG00000255681 | -1586 | 0.91 | 0.65 | 2.60E-08 | 0.26 | NA |
| chr8 | 20160811  | 20161685  | LZTS1         | ENSG00000061337 | 226   | 0.65 | 0.26 | 2.90E-08 | 0.39 | NA |
| chr8 | 9911629   | 9912633   | MSRA          | ENSG00000175806 | 353   | 0.63 | 0.27 | 5.60E-08 | 0.36 | NA |
| chr8 | 21987532  | 21989013  | HR            | ENSG00000168453 | -78   | 0.46 | 0.19 | 7.50E-08 | 0.27 | NA |
| chr8 | 82644603  | 82644849  | ZFAND1        | ENSG00000104231 | -118  | 0.62 | 0.21 | 9.50E-08 | 0.41 | NA |
| chr8 | 37654048  | 37656100  | GPR124        | ENSG00000020181 | 673   | 0.35 | 0.18 | 1.40E-07 | 0.17 | NA |
| chr8 | 8860200   | 8860742   | ERI1          | ENSG00000104626 | 157   | 0.48 | 0.19 | 1.60E-07 | 0.29 | NA |
| chr8 | 22422534  | 22423702  | SORBS3        | ENSG00000120896 | 553   | 0.4  | 0.19 | 1.90E-07 | 0.21 | NA |
| chr8 | 99952020  | 99954686  | STK3          | ENSG00000104375 | 1446  | 0.35 | 0.2  | 2.10E-07 | 0.16 | NA |
| chr8 | 142010440 | 142011907 | PTK2          | ENSG00000169398 | -148  | 0.37 | 0.17 | 2.30E-07 | 0.2  | NA |
| chr8 | 42751212  | 42753132  | RNF170        | ENSG00000120925 | -444  | 0.36 | 0.2  | 3.90E-07 | 0.16 | NA |
| chr8 | 73448659  | 73449725  | KCNB2         | ENSG00000182674 | -434  | 0.62 | 0.23 | 3.90E-07 | 0.4  | NA |
| chr8 | 11725059  | 11725600  | CTSB          | ENSG00000164733 | -127  | 0.56 | 0.13 | 4.00E-07 | 0.43 | NA |
| chr8 | 62626556  | 62627511  | ASPH          | ENSG00000198363 | 51    | 0.47 | 0.13 | 4.10E-07 | 0.35 | NA |
| chr8 | 58055960  | 58056244  | RP11-513O17.2 | ENSG00000253301 | 840   | 0.81 | 0.51 | 5.30E-07 | 0.29 | NA |
| chr8 | 12611609  | 12613562  | LONRF1        | ENSG00000154359 | -734  | 0.33 | 0.18 | 6.00E-07 | 0.15 | NA |
| chr8 | 144510850 | 144513957 | MAFA          | ENSG00000182759 | -335  | 0.35 | 0.22 | 6.50E-07 | 0.13 | NA |
| chr8 | 56792115  | 56793325  | LYN           | ENSG00000254087 | 348   | 0.44 | 0.16 | 7.70E-07 | 0.28 | NA |
| chr8 | 143750759 | 143751448 | JRK           | ENSG00000234616 | 247   | 0.47 | 0.19 | 7.90E-07 | 0.28 | NA |

|      |           |           |               |                 |       |      |      |          |      |    |
|------|-----------|-----------|---------------|-----------------|-------|------|------|----------|------|----|
| chr8 | 60030134  | 60032356  | RP11-25K19.1  | ENSG00000167912 | -354  | 0.49 | 0.23 | 8.00E-07 | 0.25 | NA |
| chr8 | 24770908  | 24772547  | NEFM          | ENSG00000104722 | 456   | 0.49 | 0.26 | 1.00E-06 | 0.23 | NA |
| chr8 | 57358126  | 57359415  | PENK          | ENSG00000181195 | -563  | 0.34 | 0.19 | 1.20E-06 | 0.15 | NA |
| chr8 | 109799429 | 109799847 | TMEM74        | ENSG00000164841 | 185   | 0.59 | 0.24 | 1.40E-06 | 0.35 | NA |
| chr8 | 1921559   | 1922872   | RP11-439C15.4 | ENSG00000253764 | -439  | 0.36 | 0.17 | 1.50E-06 | 0.18 | NA |
| chr8 | 135724770 | 135725552 | ZFAT          | ENSG00000066827 | 44    | 0.45 | 0.21 | 1.80E-06 | 0.23 | NA |
| chr8 | 13133842  | 13134312  | DLC1          | ENSG00000164741 | -22   | 0.39 | 0.18 | 2.20E-06 | 0.2  | NA |
| chr8 | 43101489  | 43102542  | RP11-726G23.2 | ENSG00000253884 | 63    | 0.46 | 0.23 | 2.80E-06 | 0.23 | NA |
| chr8 | 29205664  | 29209847  | DUSP4         | ENSG00000120875 | -1433 | 0.33 | 0.21 | 3.10E-06 | 0.11 | NA |
| chr8 | 139508795 | 139509774 | FAM135B       | ENSG00000147724 | -219  | 0.32 | 0.16 | 3.30E-06 | 0.16 | NA |
| chr8 | 26371172  | 26372830  | PNMA2         | ENSG00000240694 | -613  | 0.37 | 0.19 | 4.60E-06 | 0.18 | NA |
| chr8 | 141644429 | 141645598 | EIF2C2        | ENSG00000123908 | 632   | 0.39 | 0.19 | 5.50E-06 | 0.2  | NA |
| chr8 | 144675988 | 144676207 | EEF1D         | ENSG00000104529 | -1034 | 0.85 | 0.26 | 5.60E-06 | 0.59 | NA |
| chr8 | 120867785 | 120868440 | DSCC1         | ENSG00000136982 | -14   | 0.49 | 0.19 | 5.70E-06 | 0.3  | NA |
| chr8 | 145549984 | 145551217 | DGAT1         | ENSG00000185000 | -270  | 0.29 | 0.16 | 6.50E-06 | 0.13 | NA |
| chr8 | 145654517 | 145654810 | VPS28         | ENSG00000160948 | -732  | 0.75 | 0.35 | 6.80E-06 | 0.4  | NA |
| chr8 | 97657174  | 97657943  | AC010859.1    | ENSG00000104324 | 103   | 0.49 | 0.13 | 7.10E-06 | 0.36 | NA |
| chr8 | 146012190 | 146012913 | ZNF34         | ENSG00000196378 | 138   | 0.41 | 0.15 | 7.20E-06 | 0.26 | NA |
| chr8 | 57232370  | 57232795  | SDR16C5       | ENSG00000170786 | 152   | 0.56 | 0.19 | 7.80E-06 | 0.37 | NA |
| chr8 | 18871072  | 18872046  | PSD3          | ENSG00000156011 | -363  | 0.54 | 0.2  | 1.10E-05 | 0.34 | NA |
| chr8 | 67624608  | 67625424  | SGK3          | ENSG00000104205 | 363   | 0.46 | 0.17 | 1.10E-05 | 0.29 | NA |
| chr8 | 143781581 | 143782609 | LY6K          | ENSG00000160886 | 205   | 0.86 | 0.69 | 1.10E-05 | 0.17 | NA |
| chr8 | 145514719 | 145515959 | BOP1          | ENSG00000170727 | -290  | 0.35 | 0.15 | 1.10E-05 | 0.2  | NA |
| chr8 | 32405407  | 32406901  | NRG1          | ENSG00000157168 | 426   | 0.26 | 0.15 | 1.20E-05 | 0.1  | NA |
| chr8 | 120885814 | 120886610 | DEPTOR        | ENSG00000155792 | 255   | 0.46 | 0.17 | 1.30E-05 | 0.28 | NA |
| chr8 | 125739685 | 125741266 | MTSS1         | ENSG00000170873 | -618  | 0.39 | 0.18 | 1.30E-05 | 0.21 | NA |
| chr8 | 38853700  | 38855116  | TM2D2         | ENSG00000169490 | -406  | 0.32 | 0.19 | 1.70E-05 | 0.13 | NA |
| chr8 | 91013141  | 91014266  | DECR1         | ENSG00000104325 | 70    | 0.28 | 0.13 | 2.10E-05 | 0.15 | NA |
| chr8 | 126441471 | 126443552 | TRIB1         | ENSG00000173334 | -52   | 0.29 | 0.16 | 2.10E-05 | 0.13 | NA |
| chr8 | 144240761 | 144242113 | LY6H          | ENSG00000176956 | 20    | 0.43 | 0.24 | 2.10E-05 | 0.19 | NA |

|      |           |           |                |                 |      |      |      |          |       |    |
|------|-----------|-----------|----------------|-----------------|------|------|------|----------|-------|----|
| chr8 | 61564204  | 61565152  | RP11-91I20.2   | ENSG00000254869 | 1442 | 0.4  | 0.17 | 2.70E-05 | 0.22  | NA |
| chr8 | 145149550 | 145150440 | CYC1           | ENSG00000179091 | 65   | 0.32 | 0.14 | 3.40E-05 | 0.18  | NA |
| chr8 | 8748652   | 8751478   | MFHAS1         | ENSG00000147324 | 1090 | 0.36 | 0.24 | 3.70E-05 | 0.12  | NA |
| chr8 | 141467218 | 141467927 | TRAPPC9        | ENSG00000167632 | 289  | 0.4  | 0.19 | 4.10E-05 | 0.21  | NA |
| chr8 | 54934665  | 54935160  | TCEA1          | ENSG00000187735 | -204 | 0.4  | 0.18 | 4.40E-05 | 0.22  | NA |
| chr8 | 42396235  | 42397195  | C8orf40        | ENSG00000176209 | 417  | 0.39 | 0.18 | 4.50E-05 | 0.21  | NA |
| chr8 | 120220388 | 120221222 | MAL2           | ENSG00000147676 | 195  | 0.46 | 0.22 | 4.50E-05 | 0.24  | NA |
| chr8 | 132916322 | 132917060 | EFR3A          | ENSG00000132294 | 356  | 0.48 | 0.19 | 4.80E-05 | 0.29  | NA |
| chr8 | 102236153 | 102236949 | KB-1410C5.1    | ENSG00000253942 | 250  | 0.96 | 0.48 | 5.20E-05 | 0.48  | NA |
| chr8 | 145163068 | 145165467 | KIAA1875       | ENSG00000179698 | -335 | 0.91 | 0.82 | 5.40E-05 | 0.093 | NA |
| chr8 | 125383817 | 125385437 | TMEM65         | ENSG00000164983 | 306  | 0.32 | 0.16 | 5.60E-05 | 0.17  | NA |
| chr8 | 91803656  | 91804141  | NECAB1         | ENSG00000123119 | 120  | 0.3  | 0.1  | 5.70E-05 | 0.2   | NA |
| chr8 | 125551211 | 125551521 | TATDN1         | ENSG00000147687 | -88  | 0.36 | 0.09 | 5.90E-05 | 0.26  | NA |
| chr8 | 29952635  | 29953584  | LEPROTL1       | ENSG00000104660 | 195  | 0.31 | 0.12 | 6.30E-05 | 0.19  | NA |
| chr8 | 25897200  | 25897612  | EBF2           | ENSG00000221818 | 1598 | 0.83 | 0.59 | 6.70E-05 | 0.24  | NA |
| chr8 | 110551736 | 110552643 | EBAG9          | ENSG00000147654 | 249  | 0.49 | 0.2  | 7.00E-05 | 0.29  | NA |
| chr8 | 1711234   | 1712654   | CTD-2336O2.1   | ENSG00000253982 | -481 | 0.4  | 0.16 | 7.40E-05 | 0.25  | NA |
| chr8 | 41386448  | 41386925  | GINS4          | ENSG00000147536 | -39  | 0.41 | 0.16 | 8.60E-05 | 0.25  | NA |
| chr8 | 75232649  | 75234101  | GDAP1          | ENSG00000104381 | 10   | 0.35 | 0.18 | 8.70E-05 | 0.17  | NA |
| chr8 | 21966485  | 21967329  | NUDT18         | ENSG00000173566 | 3    | 0.45 | 0.2  | 0.00011  | 0.26  | NA |
| chr8 | 43132045  | 43132478  | RP11-726G23.10 | ENSG00000234713 | -295 | 0.48 | 0.3  | 0.00011  | 0.18  | NA |
| chr8 | 686830    | 689496    | CTD-3212A4.1   | ENSG00000237647 | 512  | 0.36 | 0.25 | 0.00012  | 0.11  | NA |
| chr8 | 52811167  | 52812312  | PCMTD1         | ENSG00000168300 | -209 | 0.48 | 0.25 | 0.00012  | 0.23  | NA |
| chr8 | 55370170  | 55372525  | SOX17          | ENSG00000164736 | 852  | 0.27 | 0.17 | 0.00015  | 0.092 | NA |
| chr8 | 61193312  | 61194195  | CA8            | ENSG00000178538 | 130  | 0.37 | 0.18 | 0.00015  | 0.19  | NA |
| chr8 | 95652455  | 95652873  | ESRP1          | ENSG00000104413 | -638 | 0.43 | 0.18 | 0.00016  | 0.25  | NA |
| chr8 | 30669450  | 30670475  | PPP2CB         | ENSG00000104695 | 151  | 0.35 | 0.18 | 0.00017  | 0.17  | NA |
| chr8 | 22436295  | 22437076  | PDLIM2         | ENSG00000120913 | 42   | 0.41 | 0.15 | 2.00E-04 | 0.25  | NA |
| chr8 | 132052203 | 132054749 | ADCY8          | ENSG00000155897 | -897 | 0.27 | 0.15 | 0.00022  | 0.12  | NA |
| chr8 | 67687305  | 67687787  | SGK3           | ENSG00000104205 | 97   | 0.44 | 0.25 | 0.00023  | 0.19  | NA |

|      |           |           |               |                 |       |      |      |          |       |    |
|------|-----------|-----------|---------------|-----------------|-------|------|------|----------|-------|----|
| chr8 | 97273615  | 97274767  | MTERFD1       | ENSG00000156469 | -375  | 0.38 | 0.18 | 0.00026  | 0.2   | NA |
| chr8 | 145742464 | 145743826 | RECQL4        | ENSG00000160957 | -262  | 0.31 | 0.14 | 0.00026  | 0.16  | NA |
| chr8 | 70744098  | 70747441  | SLCO5A1       | ENSG00000137571 | -819  | 0.31 | 0.2  | 0.00027  | 0.11  | NA |
| chr8 | 145158467 | 145160068 | SHARPIN       | ENSG00000179526 | -608  | 0.33 | 0.21 | 0.00027  | 0.12  | NA |
| chr8 | 95906788  | 95909088  | CCNE2         | ENSG00000175305 | -1060 | 0.34 | 0.21 | 0.00028  | 0.12  | NA |
| chr8 | 79428433  | 79428754  | PKIA          | ENSG00000171033 | 3     | 0.34 | 0.15 | 0.00029  | 0.2   | NA |
| chr8 | 19674263  | 19675236  | INTS10        | ENSG00000104613 | 98    | 0.35 | 0.19 | 3.00E-04 | 0.16  | NA |
| chr8 | 42697869  | 42698326  | THAP1         | ENSG00000131931 | -166  | 0.44 | 0.19 | 0.00033  | 0.25  | NA |
| chr8 | 42911215  | 42912042  | FNTA          | ENSG00000168522 | 332   | 0.48 | 0.18 | 0.00033  | 0.3   | NA |
| chr8 | 143858279 | 143859411 | LYNX1         | ENSG00000180155 | -407  | 0.33 | 0.16 | 0.00033  | 0.17  | NA |
| chr8 | 144852777 | 144854555 | RP11-429J17.7 | ENSG00000254973 | 326   | 0.27 | 0.13 | 0.00036  | 0.14  | NA |
| chr8 | 145980532 | 145981234 | ZNF251        | ENSG00000198169 | -59   | 0.51 | 0.28 | 0.00036  | 0.23  | NA |
| chr8 | 101962644 | 101965427 | YWHAZ         | ENSG00000164924 | -1267 | 0.32 | 0.2  | 0.00038  | 0.12  | NA |
| chr8 | 99305903  | 99306726  | NIPAL2        | ENSG00000104361 | 24    | 0.3  | 0.15 | 4.00E-04 | 0.15  | NA |
| chr8 | 48920837  | 48921414  | UBE2V2        | ENSG00000169139 | 165   | 0.39 | 0.17 | 0.00042  | 0.22  | NA |
| chr8 | 99960497  | 99961438  | OSR2          | ENSG00000164920 | 347   | 0.44 | 0.21 | 0.00045  | 0.22  | NA |
| chr8 | 126103760 | 126104122 | NSMCE2        | ENSG00000156831 | 20    | 0.5  | 0.11 | 0.00045  | 0.39  | NA |
| chr8 | 74206223  | 74208179  | RPL7          | ENSG00000147604 | -528  | 0.26 | 0.17 | 5.00E-04 | 0.096 | NA |
| chr8 | 37756454  | 37757339  | RAB11FIP1     | ENSG00000156675 | 63    | 0.38 | 0.19 | 0.00052  | 0.2   | NA |
| chr8 | 12293393  | 12294880  | FAM86B2       | ENSG00000145002 | -284  | 0.3  | 1    | 0.00054  | -0.7  | NA |
| chr8 | 38243741  | 38244695  | LETM2         | ENSG00000165046 | 397   | 0.38 | 0.16 | 0.00058  | 0.22  | NA |
| chr8 | 102504478 | 102504841 | GRHL2         | ENSG00000083307 | -1    | 0.7  | 0.4  | 6.00E-04 | 0.3   | NA |
| chr8 | 80523975  | 80525765  | STMN2         | ENSG00000104435 | 900   | 0.46 | 0.26 | 0.00061  | 0.19  | NA |
| chr8 | 95960751  | 95962372  | TP53INP1      | ENSG00000164938 | 33    | 0.3  | 0.17 | 0.00073  | 0.12  | NA |
| chr8 | 21998711  | 21999544  | REEP4         | ENSG00000168476 | -74   | 0.38 | 0.18 | 0.00074  | 0.2   | NA |
| chr8 | 124286209 | 124287666 | ZHX1          | ENSG00000165156 | -700  | 0.33 | 0.15 | 0.00074  | 0.18  | NA |
| chr8 | 58054945  | 58055600  | RP11-513O17.2 | ENSG00000253301 | 24    | 0.72 | 0.45 | 0.00075  | 0.28  | NA |
| chr8 | 23539807  | 23540602  | NKX3-1        | ENSG00000167034 | 198   | 0.28 | 0.17 | 0.00076  | 0.11  | NA |
| chr8 | 37887692  | 37888830  | EIF4EBP1      | ENSG00000187840 | 402   | 0.6  | 0.2  | 0.00076  | 0.4   | NA |
| chr8 | 681066    | 681731    | ERICH1        | ENSG00000104714 | -201  | 0.46 | 0.19 | 0.00083  | 0.26  | NA |

|      |           |           |                |                 |       |      |      |         |       |    |
|------|-----------|-----------|----------------|-----------------|-------|------|------|---------|-------|----|
| chr8 | 145581331 | 145582765 | FBXL6          | ENSG00000182325 | -462  | 0.29 | 0.16 | 0.00083 | 0.13  | NA |
| chr8 | 116679698 | 116679936 | TRPS1          | ENSG00000104447 | 417   | 0.77 | 0.4  | 0.00091 | 0.37  | NA |
| chr8 | 38088735  | 38089956  | DDHD2          | ENSG00000085788 | 484   | 0.37 | 0.2  | 0.00094 | 0.16  | NA |
| chr8 | 144099928 | 144100593 | LY6E           | ENSG00000160932 | 326   | 0.4  | 0.21 | 0.00095 | 0.18  | NA |
| chr8 | 56013656  | 56015761  | XKR4           | ENSG00000206579 | -241  | 0.31 | 0.2  | 0.00096 | 0.11  | NA |
| chr8 | 131455248 | 131456285 | ASAP1          | ENSG00000153317 | 17    | 0.41 | 0.19 | 0.00096 | 0.22  | NA |
| chr8 | 134308328 | 134310145 | NDRG1          | ENSG00000104419 | -457  | 0.38 | 0.21 | 0.00099 | 0.17  | NA |
| chr8 | 72459564  | 72460523  | RP11-1102P16.1 | ENSG00000253379 | -151  | 0.29 | 0.16 | 0.001   | 0.13  | NA |
| chr8 | 104152726 | 104153390 | BAALC          | ENSG00000164929 | 120   | 0.37 | 0.17 | 0.001   | 0.21  | NA |
| chr8 | 103818620 | 103819495 | KB-1732A1.1    | ENSG00000253669 | 7     | 0.36 | 0.16 | 0.0011  | 0.19  | NA |
| chr8 | 10587304  | 10591109  | SOX7           | ENSG00000171056 | -1184 | 0.47 | 0.39 | 0.0012  | 0.078 | NA |
| chr8 | 98881311  | 98881843  | MATN2          | ENSG00000132561 | 266   | 0.37 | 0.18 | 0.0012  | 0.19  | NA |
| chr8 | 128806081 | 128806899 | PVT1           | ENSG00000249859 | -289  | 0.45 | 0.26 | 0.0012  | 0.18  | NA |
| chr8 | 146023902 | 146024734 | ZNF517         | ENSG00000197363 | 57    | 0.25 | 0.14 | 0.0012  | 0.11  | NA |
| chr8 | 21947065  | 21947410  | FAM160B2       | ENSG00000158863 | 493   | 0.46 | 0.2  | 0.0013  | 0.26  | NA |
| chr8 | 65492935  | 65494452  | RP11-21C4.1    | ENSG00000254102 | 752   | 0.37 | 0.18 | 0.0014  | 0.18  | NA |
| chr8 | 71314145  | 71316770  | NCOA2          | ENSG00000140396 | -1143 | 0.28 | 0.19 | 0.0014  | 0.083 | NA |
| chr8 | 356374    | 357674    | FBXO25         | ENSG00000147364 | 596   | 0.35 | 0.18 | 0.0015  | 0.17  | NA |
| chr8 | 101225077 | 101225879 | SPAG1          | ENSG00000104450 | 163   | 0.3  | 0.16 | 0.0015  | 0.14  | NA |
| chr8 | 105235384 | 105235979 | RIMS2          | ENSG00000176406 | 89    | 0.33 | 0.18 | 0.0015  | 0.14  | NA |
| chr8 | 67344497  | 67344989  | ADHFE1         | ENSG00000147576 | 25    | 0.5  | 0.1  | 0.0016  | 0.4   | NA |
| chr8 | 95486930  | 95487374  | RAD54B         | ENSG00000197275 | 130   | 0.27 | 0.08 | 0.002   | 0.19  | NA |
| chr8 | 96145760  | 96146729  | PLEKHF2        | ENSG00000175895 | 212   | 0.28 | 0.16 | 0.002   | 0.12  | NA |
| chr8 | 140714585 | 140718259 | KCNK9          | ENSG00000169427 | -1138 | 0.34 | 0.23 | 0.0022  | 0.11  | NA |
| chr8 | 74884234  | 74884602  | TCEB1          | ENSG00000154582 | -77   | 0.38 | 0.16 | 0.0023  | 0.23  | NA |
| chr8 | 103875222 | 103877084 | AZIN1          | ENSG00000155096 | 110   | 0.37 | 0.23 | 0.0023  | 0.14  | NA |
| chr8 | 22526298  | 22526757  | BIN3           | ENSG00000147439 | 65    | 0.3  | 0.17 | 0.0027  | 0.13  | NA |
| chr8 | 96280844  | 96281747  | KB-1047C11.2   | ENSG00000253773 | 231   | 0.38 | 0.24 | 0.0027  | 0.15  | NA |
| chr8 | 145733793 | 145735370 | MFSD3          | ENSG00000167700 | 124   | 0.32 | 0.19 | 0.0028  | 0.13  | NA |
| chr8 | 54163303  | 54164443  | OPRK1          | ENSG00000082556 | 99    | 0.37 | 0.24 | 0.0029  | 0.13  | NA |

|      |           |           |               |                 |       |      |      |        |       |    |
|------|-----------|-----------|---------------|-----------------|-------|------|------|--------|-------|----|
| chr8 | 133492398 | 133493586 | KCNQ3         | ENSG00000184156 | -435  | 0.33 | 0.22 | 0.0029 | 0.12  | NA |
| chr8 | 67976440  | 67977448  | COPS5         | ENSG00000121022 | -435  | 0.33 | 0.17 | 0.003  | 0.15  | NA |
| chr8 | 53626005  | 53627501  | RB1CC1        | ENSG00000023287 | 230   | 0.3  | 0.2  | 0.0033 | 0.1   | NA |
| chr8 | 59571603  | 59572526  | NSMAF         | ENSG00000035681 | -291  | 0.27 | 0.17 | 0.0033 | 0.1   | NA |
| chr8 | 144371446 | 144372076 | ZNF696        | ENSG00000185730 | -85   | 0.84 | 0.68 | 0.0033 | 0.15  | NA |
| chr8 | 71581050  | 71581650  | LACTB2        | ENSG00000147592 | 42    | 0.39 | 0.15 | 0.0036 | 0.24  | NA |
| chr8 | 145637965 | 145639182 | SLC39A4       | ENSG00000147804 | 380   | 0.57 | 0.4  | 0.0036 | 0.17  | NA |
| chr8 | 144820669 | 144820909 | RP11-429J17.6 | ENSG00000203499 | -777  | 0.44 | 0.88 | 0.0038 | -0.44 | NA |
| chr8 | 22408672  | 22409635  | SORBS3        | ENSG00000120896 | -55   | 0.45 | 0.22 | 0.0044 | 0.24  | NA |
| chr8 | 22298112  | 22299142  | PPP3CC        | ENSG00000120910 | 295   | 0.32 | 0.21 | 0.0045 | 0.11  | NA |
| chr8 | 118532855 | 118533311 | MED30         | ENSG00000164758 | 131   | 0.36 | 0.18 | 0.0046 | 0.19  | NA |
| chr8 | 144911055 | 144912075 | PUF60         | ENSG00000179950 | -369  | 0.45 | 0.26 | 0.0046 | 0.18  | NA |
| chr8 | 22014152  | 22014559  | LGI3          | ENSG00000168481 | -165  | 0.33 | 0.14 | 0.0048 | 0.18  | NA |
| chr8 | 21769694  | 21770080  | DOK2          | ENSG00000147443 | 191   | 0.82 | 0.97 | 0.0049 | -0.14 | NA |
| chr8 | 30584790  | 30585651  | GSR           | ENSG00000104687 | -36   | 0.33 | 0.16 | 0.0049 | 0.16  | NA |
| chr8 | 22102303  | 22103142  | MIR320A       | ENSG00000208037 | -166  | 0.32 | 0.19 | 0.005  | 0.12  | NA |
| chr8 | 72755783  | 72756667  | RP11-383H13.1 | ENSG00000235531 | 429   | 0.25 | 0.13 | 0.0052 | 0.12  | NA |
| chr8 | 93114056  | 93115979  | RUNX1T1       | ENSG00000079102 | 118   | 0.26 | 0.19 | 0.0052 | 0.075 | NA |
| chr8 | 59465463  | 59466103  | SDCBP         | ENSG00000137575 | 300   | 0.33 | 0.12 | 0.0053 | 0.21  | NA |
| chr8 | 637393    | 638251    | ERICH1        | ENSG00000104714 | -1098 | 0.36 | 0.18 | 0.0055 | 0.19  | NA |
| chr8 | 37593834  | 37594703  | ERLIN2        | ENSG00000147475 | 151   | 0.26 | 0.12 | 0.0055 | 0.15  | NA |
| chr8 | 52321162  | 52322221  | PXDNL         | ENSG00000147485 | -152  | 0.98 | 0.92 | 0.0058 | 0.061 | NA |
| chr8 | 145669110 | 145670460 | TONSL         | ENSG00000160949 | 12    | 0.29 | 0.18 | 0.0058 | 0.12  | NA |
| chr8 | 124552539 | 124554017 | FBXO32        | ENSG00000156804 | 151   | 0.4  | 0.25 | 0.0068 | 0.14  | NA |
| chr8 | 23386220  | 23387386  | SLC25A37      | ENSG00000147454 | 485   | 0.24 | 0.16 | 0.0069 | 0.084 | NA |
| chr8 | 22224519  | 22225244  | SLC39A14      | ENSG00000104635 | 119   | 0.34 | 0.22 | 0.007  | 0.12  | NA |
| chr8 | 121823534 | 121824720 | SNTB1         | ENSG00000172164 | -324  | 0.4  | 0.24 | 0.007  | 0.16  | NA |
| chr8 | 76319450  | 76320196  | HNF4G         | ENSG00000164749 | -326  | 0.31 | 0.18 | 0.0073 | 0.14  | NA |
| chr8 | 142138208 | 142139342 | RP11-809O17.1 | ENSG00000253210 | -555  | 0.34 | 0.21 | 0.0075 | 0.13  | NA |
| chr8 | 144776009 | 144776734 | RP11-429J17.2 | ENSG00000181097 | -1953 | 0.99 | 0.93 | 0.0076 | 0.066 | NA |

|      |           |           |               |                  |      |      |      |        |       |    |
|------|-----------|-----------|---------------|------------------|------|------|------|--------|-------|----|
| chr8 | 11659676  | 11660795  | FDFT1         | ENSG00000079459  | 487  | 0.3  | 0.19 | 0.0079 | 0.11  | NA |
| chr8 | 11141894  | 11142686  | MTMR9         | ENSG00000104643  | 365  | 0.34 | 0.17 | 0.008  | 0.17  | NA |
| chr8 | 28558588  | 28559960  | CTD-2172A10.1 | ENSG000000246339 | -504 | 0.28 | 0.16 | 0.0085 | 0.11  | NA |
| chr8 | 29884771  | 29885310  | MAP2K1P1      | ENSG000000254013 | -189 | 0.91 | 0.97 | 0.0086 | -0.06 | NA |
| chr8 | 22925655  | 22926912  | RP11-875O11.2 | ENSG000000246130 | 541  | 0.31 | 0.17 | 0.0088 | 0.14  | NA |
| chr8 | 27629753  | 27630234  | CCDC25        | ENSG00000147419  | 131  | 0.37 | 0.15 | 0.0088 | 0.22  | NA |
| chr8 | 123792369 | 123794942 | ZHX2          | ENSG00000178764  | 22   | 0.3  | 0.22 | 0.0096 | 0.075 | NA |
| chr8 | 16884363  | 16885339  | EFHA2         | ENSG00000155970  | 104  | 0.31 | 0.19 | 0.0097 | 0.12  | NA |
| chr8 | 48649766  | 48651653  | CEBPD         | ENSG000000221869 | 268  | 0.3  | 0.18 | 0.011  | 0.12  | NA |
| chr8 | 61429174  | 61430173  | RP11-163N6.2  | ENSG000000251396 | -334 | 0.35 | 0.2  | 0.011  | 0.16  | NA |
| chr8 | 106330518 | 106332120 | ZFPM2         | ENSG00000169946  | 399  | 0.32 | 0.21 | 0.011  | 0.11  | NA |
| chr8 | 67837480  | 67837954  | SNHG6         | ENSG000000245910 | 59   | 0.34 | 0.16 | 0.012  | 0.18  | NA |
| chr8 | 10586613  | 10586886  | CTD-2135J3.3  | ENSG000000248896 | -75  | 0.95 | 0.71 | 0.013  | 0.25  | NA |
| chr8 | 71519680  | 71520857  | TRAM1         | ENSG00000067167  | -255 | 0.36 | 0.2  | 0.013  | 0.17  | NA |
| chr8 | 74005021  | 74005856  | C8orf84       | ENSG00000164764  | 69   | 0.38 | 0.25 | 0.013  | 0.14  | NA |
| chr8 | 95653898  | 95654733  | ESRP1         | ENSG00000104413  | 475  | 0.28 | 0.17 | 0.013  | 0.11  | NA |
| chr8 | 98787835  | 98788874  | LAPTM4B       | ENSG00000104341  | 277  | 0.34 | 0.23 | 0.013  | 0.1   | NA |
| chr8 | 94712366  | 94713345  | FAM92A1       | ENSG00000188343  | 375  | 0.24 | 0.15 | 0.014  | 0.094 | NA |
| chr8 | 94752975  | 94753499  | RBM12B        | ENSG00000183808  | -53  | 0.4  | 0.21 | 0.014  | 0.19  | NA |
| chr8 | 124780286 | 124781265 | FAM91A1       | ENSG00000176853  | 79   | 0.33 | 0.23 | 0.015  | 0.097 | NA |
| chr8 | 11665773  | 11666045  | FDFT1         | ENSG00000079459  | -17  | 0.25 | 0.11 | 0.015  | 0.14  | NA |
| chr8 | 20054546  | 20055027  | ATP6V1B2      | ENSG00000147416  | -92  | 0.45 | 0.13 | 0.015  | 0.32  | NA |
| chr8 | 144357997 | 144359075 | GLI4          | ENSG000000250571 | 1767 | 0.32 | 0.18 | 0.015  | 0.13  | NA |
| chr8 | 17658166  | 17659321  | MTUS1         | ENSG00000129422  | -566 | 0.25 | 0.17 | 0.016  | 0.082 | NA |
| chr8 | 63951122  | 63952104  | GGH           | ENSG00000137563  | -253 | 0.27 | 0.17 | 0.016  | 0.1   | NA |
| chr8 | 141646075 | 141646514 | EIF2C2        | ENSG00000123908  | -576 | 0.26 | 0.14 | 0.016  | 0.12  | NA |
| chr8 | 145016417 | 145016916 | PLEC          | ENSG00000178209  | 26   | 0.33 | 0.19 | 0.016  | 0.14  | NA |
| chr8 | 110345916 | 110346904 | NUDCD1        | ENSG00000120526  | -63  | 0.44 | 0.25 | 0.017  | 0.19  | NA |
| chr8 | 22856800  | 22857728  | RHOBTB2       | ENSG00000008853  | 172  | 0.41 | 0.2  | 0.018  | 0.21  | NA |
| chr8 | 27168205  | 27169082  | TRIM35        | ENSG00000104228  | -270 | 0.31 | 0.16 | 0.018  | 0.15  | NA |

|      |           |           |               |                 |      |      |      |       |        |    |
|------|-----------|-----------|---------------|-----------------|------|------|------|-------|--------|----|
| chr8 | 136468939 | 136470342 | RP11-343P9.1  | ENSG00000254372 | -445 | 0.41 | 0.19 | 0.019 | 0.21   | NA |
| chr8 | 11559596  | 11562956  | GATA4         | ENSG00000136574 | -384 | 0.29 | 0.21 | 0.02  | 0.08   | NA |
| chr8 | 65710990  | 65711722  | CYP7B1        | ENSG00000172817 | -38  | 0.4  | 0.3  | 0.02  | 0.11   | NA |
| chr8 | 28479635  | 28480798  | EXTL3         | ENSG00000012232 | -30  | 0.36 | 0.23 | 0.021 | 0.13   | NA |
| chr8 | 38614414  | 38615236  | TACC1         | ENSG00000147526 | 68   | 0.28 | 0.19 | 0.021 | 0.086  | NA |
| chr8 | 41435360  | 41436159  | AGPAT6        | ENSG00000158669 | 52   | 0.48 | 0.31 | 0.021 | 0.18   | NA |
| chr8 | 144349048 | 144350070 | GLI4          | ENSG00000250571 | -44  | 0.24 | 0.16 | 0.021 | 0.075  | NA |
| chr8 | 19094956  | 19095376  | RP11-618M23.1 | ENSG00000250316 | -81  | 1    | 0.92 | 0.022 | 0.085  | NA |
| chr8 | 86375500  | 86376714  | CA2           | ENSG00000104267 | 26   | 0.31 | 0.21 | 0.023 | 0.1    | NA |
| chr8 | 42948532  | 42948928  | AC113191.1    | ENSG00000185900 | 72   | 0.47 | 0.2  | 0.023 | 0.27   | NA |
| chr8 | 143625625 | 143626162 | BAI1          | ENSG00000181790 | 1031 | 0.47 | 0.33 | 0.023 | 0.14   | NA |
| chr8 | 12522621  | 12523226  | AC068587.3    | ENSG00000247397 | -64  | 0.28 | 0.14 | 0.024 | 0.13   | NA |
| chr8 | 23260442  | 23261867  | LOXL2         | ENSG00000134013 | 435  | 0.37 | 0.26 | 0.024 | 0.12   | NA |
| chr8 | 48872458  | 48873907  | PRKDC         | ENSG00000253729 | -444 | 0.28 | 0.2  | 0.024 | 0.08   | NA |
| chr8 | 110374552 | 110374793 | PKHD1L1       | ENSG00000205038 | -34  | 0.71 | 0.22 | 0.024 | 0.48   | NA |
| chr8 | 81785425  | 81786038  | ZNF704        | ENSG00000164684 | 169  | 0.25 | 0.14 | 0.025 | 0.11   | NA |
| chr8 | 144416712 | 144417054 | TOP1MT        | ENSG00000184428 | 82   | 0.41 | 0.17 | 0.025 | 0.24   | NA |
| chr8 | 144897283 | 144898354 | SCRIB         | ENSG00000180900 | -269 | 0.26 | 0.19 | 0.025 | 0.062  | NA |
| chr8 | 145738638 | 145739030 | RECQL4        | ENSG00000160957 | -679 | 0.91 | 1    | 0.025 | -0.094 | NA |
| chr8 | 90996372  | 90996957  | NBN           | ENSG00000104320 | -199 | 0.26 | 0.16 | 0.026 | 0.095  | NA |
| chr8 | 97505747  | 97507607  | SDC2          | ENSG00000169439 | 636  | 0.24 | 0.16 | 0.026 | 0.076  | NA |
| chr8 | 130951372 | 130952651 | FAM49B        | ENSG00000153310 | -71  | 0.4  | 0.24 | 0.026 | 0.16   | NA |
| chr8 | 1496731   | 1497884   | DLGAP2        | ENSG00000198010 | 497  | 0.94 | 0.9  | 0.027 | 0.043  | NA |
| chr8 | 24812946  | 24814299  | NEFL          | ENSG00000104725 | 1002 | 0.29 | 0.21 | 0.027 | 0.079  | NA |
| chr8 | 104383409 | 104384109 | CTHRC1        | ENSG00000164932 | 16   | 0.27 | 0.15 | 0.027 | 0.12   | NA |
| chr8 | 8243559   | 8243984   | AC068353.1    | ENSG00000182319 | 237  | 0.35 | 0.22 | 0.028 | 0.14   | NA |
| chr8 | 11059011  | 11059242  | XKR6          | ENSG00000171044 | -251 | 0.39 | 0.18 | 0.029 | 0.21   | NA |
| chr8 | 23562475  | 23565175  | NKX2-6        | ENSG00000180053 | 97   | 0.41 | 0.27 | 0.029 | 0.14   | NA |
| chr8 | 41753340  | 41755250  | ANK1          | ENSG00000029534 | -15  | 0.29 | 0.2  | 0.03  | 0.084  | NA |
| chr8 | 101661671 | 101662022 | SNX31         | ENSG00000174226 | 47   | 0.5  | 0.14 | 0.03  | 0.36   | NA |



|      |           |           |               |                 |       |      |      |       |       |    |
|------|-----------|-----------|---------------|-----------------|-------|------|------|-------|-------|----|
| chr8 | 17013436  | 17014790  | ZDHHC2        | ENSG00000104219 | 575   | 0.32 | 0.22 | 0.031 | 0.098 | NA |
| chr8 | 41165852  | 41167140  | SFRP1         | ENSG00000104332 | 492   | 0.28 | 0.19 | 0.031 | 0.094 | NA |
| chr8 | 27471954  | 27472523  | CLU           | ENSG00000120885 | -40   | 1    | 0.4  | 0.034 | 0.6   | NA |
| chr8 | 38758457  | 38759380  | PLEKHA2       | ENSG00000169499 | 165   | 0.24 | 0.15 | 0.035 | 0.082 | NA |
| chr8 | 30241416  | 30242878  | RBPMS         | ENSG00000157110 | 203   | 0.31 | 0.22 | 0.036 | 0.083 | NA |
| chr8 | 110656795 | 110657291 | SYBU          | ENSG00000147642 | -35   | 0.33 | 0.18 | 0.036 | 0.16  | NA |
| chr8 | 94928518  | 94930124  | PDP1          | ENSG00000164951 | 238   | 0.3  | 0.22 | 0.037 | 0.083 | NA |
| chr8 | 146077931 | 146078881 | COMMD5        | ENSG00000170619 | -364  | 0.33 | 0.23 | 0.037 | 0.1   | NA |
| chr8 | 64080674  | 64081766  | YTHDF3        | ENSG00000185728 | 108   | 0.27 | 0.17 | 0.038 | 0.098 | NA |
| chr8 | 144800957 | 144801335 | RP11-429J17.5 | ENSG00000254548 | -85   | 0.65 | 0.77 | 0.038 | -0.12 | NA |
| chr8 | 42995665  | 42996591  | HGSNAT        | ENSG00000165102 | 481   | 0.34 | 0.2  | 0.039 | 0.14  | NA |
| chr8 | 17270603  | 17271120  | MTMR7         | ENSG00000003987 | -45   | 0.24 | 0.11 | 0.04  | 0.13  | NA |
| chr8 | 145017868 | 145018444 | PLEC          | ENSG00000178209 | -30   | 0.67 | 0.19 | 0.04  | 0.48  | NA |
| chr8 | 82632973  | 82633672  | ZFAND1        | ENSG00000104231 | 154   | 0.53 | 0.23 | 0.041 | 0.3   | NA |
| chr8 | 41347794  | 41348581  | GOLGA7        | ENSG00000147533 | 272   | 0.41 | 0.29 | 0.042 | 0.12  | NA |
| chr8 | 56986556  | 56987308  | RPS20         | ENSG00000008988 | -17   | 0.25 | 0.12 | 0.043 | 0.13  | NA |
| chr8 | 65290108  | 65290946  | RP11-32K4.2   | ENSG00000254377 | 10    | 0.48 | 0.34 | 0.044 | 0.14  | NA |
| chr8 | 95651206  | 95651760  | ESRP1         | ENSG00000104413 | -1819 | 0.46 | 0.26 | 0.045 | 0.2   | NA |
| chr8 | 145111297 | 145111564 | OPLAH         | ENSG00000178814 | -1648 | 0.78 | 0.93 | 0.045 | -0.15 | NA |
| chr8 | 124253054 | 124253707 | C8orf76       | ENSG00000189376 | 146   | 0.35 | 0.21 | 0.046 | 0.14  | NA |
| chr8 | 104310809 | 104311620 | RP11-318M2.2  | ENSG00000247081 | -223  | 0.35 | 0.24 | 0.047 | 0.11  | NA |
| chr8 | 119123974 | 119124432 | EXT1          | ENSG00000182197 | -111  | 0.31 | 0.2  | 0.047 | 0.1   | NA |
| chr8 | 144651572 | 144652288 | C8orf73       | ENSG00000204839 | -10   | 0.35 | 0.21 | 0.048 | 0.14  | NA |
| chr8 | 144691400 | 144692269 | PYCRL         | ENSG00000104524 | -107  | 0.5  | 0.24 | 0.048 | 0.26  | NA |
| chr8 | 146227946 | 146228921 | C8orf77       | ENSG00000255559 | 236   | 0.24 | 0.16 | 0.048 | 0.081 | NA |
| chr8 | 37707149  | 37707507  | BRF2          | ENSG00000104221 | 28    | 0.23 | 0.1  | 0.051 | 0.13  | NA |
| chr8 | 41654875  | 41655984  | ANK1          | ENSG00000029534 | -318  | 0.92 | 0.78 | 0.051 | 0.13  | NA |
| chr8 | 33371897  | 33372526  | C8orf41       | ENSG00000129696 | -1092 | 0.32 | 0.13 | 0.052 | 0.19  | NA |
| chr8 | 99129434  | 99129855  | HRSP12        | ENSG00000132541 | -175  | 0.21 | 0.14 | 0.055 | 0.078 | NA |
| chr8 | 105478672 | 105479340 | DPYS          | ENSG00000147647 | 266   | 0.41 | 0.3  | 0.056 | 0.11  | NA |

|      |           |           |               |                 |       |      |      |       |        |    |
|------|-----------|-----------|---------------|-----------------|-------|------|------|-------|--------|----|
| chr8 | 21923840  | 21924633  | EPB49         | ENSG00000158856 | 227   | 0.2  | 0.29 | 0.059 | -0.091 | NA |
| chr8 | 102217317 | 102218461 | ZNF706        | ENSG00000120963 | -374  | 0.25 | 0.17 | 0.059 | 0.076  | NA |
| chr8 | 144099456 | 144099731 | LY6E          | ENSG00000160932 | 194   | 0.62 | 0.18 | 0.059 | 0.44   | NA |
| chr8 | 121457353 | 121457657 | MRPL13        | ENSG00000172172 | 121   | 0.36 | 0.23 | 0.06  | 0.13   | NA |
| chr8 | 120844798 | 120845115 | TAF2          | ENSG00000064313 | 118   | 0.45 | 0.24 | 0.061 | 0.21   | NA |
| chr8 | 144635308 | 144636026 | GSDMD         | ENSG00000104518 | 290   | 0.6  | 0.27 | 0.061 | 0.33   | NA |
| chr8 | 98289604  | 98290404  | TSPYL5        | ENSG00000180543 | 172   | 0.43 | 0.28 | 0.062 | 0.14   | NA |
| chr8 | 66546058  | 66546400  | ARMC1         | ENSG00000104442 | 168   | 0.5  | 0.25 | 0.063 | 0.25   | NA |
| chr8 | 82192378  | 82193685  | FABP5         | ENSG00000164687 | 433   | 0.4  | 0.29 | 0.064 | 0.11   | NA |
| chr8 | 11057684  | 11058479  | XKR6          | ENSG00000171044 | 262   | 0.34 | 0.23 | 0.068 | 0.11   | NA |
| chr8 | 28259183  | 28259717  | ZNF395        | ENSG00000186918 | 768   | 0.43 | 0.18 | 0.068 | 0.25   | NA |
| chr8 | 73163618  | 73164191  | RP11-656G20.1 | ENSG00000250979 | -104  | 0.21 | 0.37 | 0.07  | -0.16  | NA |
| chr8 | 107282031 | 107283876 | AC090579.1    | ENSG00000164830 | 480   | 0.29 | 0.21 | 0.071 | 0.083  | NA |
| chr8 | 92082236  | 92082985  | GS1-25119.4   | ENSG00000253738 | -259  | 0.36 | 0.23 | 0.073 | 0.13   | NA |
| chr8 | 38965013  | 38965423  | ADAM32        | ENSG00000197140 | 170   | 0.33 | 0.23 | 0.074 | 0.099  | NA |
| chr8 | 145909676 | 145912846 | ARHGAP39      | ENSG00000147799 | -67   | 0.25 | 0.19 | 0.074 | 0.056  | NA |
| chr8 | 146051833 | 146053292 | ZNF7          | ENSG00000147789 | -287  | 0.27 | 0.21 | 0.074 | 0.061  | NA |
| chr8 | 96037018  | 96037600  | C8orf38       | ENSG00000156170 | 95    | 0.22 | 0.12 | 0.075 | 0.093  | NA |
| chr8 | 7212487   | 7212890   | FAM66B        | ENSG00000215374 | 188   | 0.6  | 0.28 | 0.077 | 0.32   | NA |
| chr8 | 104033147 | 104033564 | ATP6V1C1      | ENSG00000155097 | 64    | 0.47 | 0.29 | 0.077 | 0.18   | NA |
| chr8 | 67351287  | 67351839  | ADHFE1        | ENSG00000147576 | 60    | 0.25 | 0.17 | 0.081 | 0.081  | NA |
| chr8 | 6565314   | 6566658   | CTD-2541M15.1 | ENSG00000249898 | -286  | 0.31 | 0.22 | 0.085 | 0.094  | NA |
| chr8 | 95274410  | 95274655  | GEM           | ENSG00000164949 | 15    | 0.24 | 0.15 | 0.085 | 0.086  | NA |
| chr8 | 22960384  | 22960927  | TNFRSF10C     | ENSG00000173535 | 221   | 0.28 | 0.2  | 0.086 | 0.081  | NA |
| chr8 | 143623275 | 143623662 | BAI1          | ENSG00000181790 | -1394 | 1    | 0.81 | 0.087 | 0.19   | NA |
| chr8 | 35092679  | 35093559  | UNC5D         | ENSG00000156687 | 144   | 0.41 | 0.29 | 0.088 | 0.12   | NA |
| chr8 | 38644473  | 38645760  | TACC1         | ENSG00000147526 | 394   | 0.26 | 0.2  | 0.089 | 0.064  | NA |
| chr8 | 144360666 | 144361504 | RP13-582O9.5  | ENSG00000253716 | 1934  | 0.57 | 0.49 | 0.089 | 0.086  | NA |
| chr8 | 79716681  | 79717403  | IL7           | ENSG00000104432 | 121   | 0.37 | 0.2  | 0.09  | 0.17   | NA |
| chr8 | 103250753 | 103251209 | RRM2B         | ENSG00000048392 | 22    | 0.29 | 0.15 | 0.091 | 0.14   | NA |

|      |           |           |                |                 |       |      |      |       |       |    |
|------|-----------|-----------|----------------|-----------------|-------|------|------|-------|-------|----|
| chr8 | 95835249  | 95835932  | INTS8          | ENSG00000164941 | 152   | 0.38 | 0.23 | 0.093 | 0.15  | NA |
| chr8 | 48100163  | 48100914  | RP11-1134I14.4 | ENSG00000254348 | -390  | 0.27 | 0.2  | 0.095 | 0.074 | NA |
| chr8 | 101733213 | 101735222 | PABPC1         | ENSG00000070756 | -423  | 0.27 | 0.22 | 0.095 | 0.049 | NA |
| chr8 | 144399189 | 144399391 | TOP1MT         | ENSG00000184428 | -1313 | 0.88 | 1    | 0.095 | -0.12 | NA |
| chr8 | 23314664  | 23315490  | ENTPD4         | ENSG00000197217 | 75    | 0.41 | 0.25 | 0.096 | 0.15  | NA |
| chr8 | 95565657  | 95566011  | KIAA1429       | ENSG00000164944 | -146  | 0.44 | 0.22 | 0.096 | 0.22  | NA |
| chr8 | 101321568 | 101322714 | RNF19A         | ENSG00000034677 | -387  | 0.27 | 0.21 | 0.096 | 0.059 | NA |
| chr8 | 133787441 | 133787891 | PHF20L1        | ENSG00000129292 | 48    | 0.6  | 0.19 | 0.097 | 0.41  | NA |
| chr8 | 66556764  | 66557513  | MTFR1          | ENSG00000066855 | 169   | 0.5  | 0.29 | 0.1   | 0.21  | NA |
| chr8 | 67089249  | 67089962  | CRH            | ENSG00000147571 | 1355  | 0.4  | 0.25 | 0.1   | 0.15  | NA |
| chr8 | 103424045 | 103425154 | UBR5           | ENSG00000104517 | 318   | 0.37 | 0.26 | 0.1   | 0.11  | NA |
| chr8 | 144105675 | 144105879 | LY6E           | ENSG00000160932 | 1811  | 0.96 | 0.76 | 0.1   | 0.19  | NA |
| chr8 | 145137176 | 145138235 | GPAA1          | ENSG00000197858 | 212   | 0.3  | 0.22 | 0.1   | 0.08  | NA |
| chr8 | 29119957  | 29120787  | KIF13B         | ENSG00000197892 | 207   | 0.27 | 0.18 | 0.11  | 0.093 | NA |
| chr8 | 33342171  | 33343141  | MAK16          | ENSG00000198042 | 388   | 0.33 | 0.25 | 0.11  | 0.076 | NA |
| chr8 | 38325091  | 38326374  | FGFR1          | ENSG00000077782 | -507  | 0.24 | 0.19 | 0.11  | 0.054 | NA |
| chr8 | 90914197  | 90915340  | OSGIN2         | ENSG00000164823 | 6     | 0.26 | 0.21 | 0.11  | 0.052 | NA |
| chr8 | 623372    | 623710    | ERICH1         | ENSG00000104714 | -79   | 1    | 0.89 | 0.12  | 0.11  | NA |
| chr8 | 38323719  | 38324070  | FGFR1          | ENSG00000077782 | -180  | 0.35 | 0.15 | 0.12  | 0.2   | NA |
| chr8 | 57360585  | 57360815  | PENK           | ENSG00000181195 | -1407 | 0.26 | 0.1  | 0.12  | 0.16  | NA |
| chr8 | 61822358  | 61823028  | AC022182.1     | ENSG00000254777 | 81    | 0.42 | 0.29 | 0.12  | 0.13  | NA |
| chr8 | 82754054  | 82754476  | SNX16          | ENSG00000104497 | -72   | 0.22 | 0.37 | 0.12  | -0.15 | NA |
| chr8 | 35093900  | 35094111  | UNC5D          | ENSG00000156687 | 712   | 0.33 | 0.15 | 0.13  | 0.18  | NA |
| chr8 | 65491083  | 65491319  | RP11-21C4.1    | ENSG00000254102 | -1381 | 0.27 | 0.4  | 0.13  | -0.13 | NA |
| chr8 | 99076754  | 99077244  | C8orf47        | ENSG00000177459 | 249   | 0.33 | 0.15 | 0.13  | 0.19  | NA |
| chr8 | 134581969 | 134584875 | ST3GAL1        | ENSG00000008513 | -800  | 0.26 | 0.21 | 0.13  | 0.051 | NA |
| chr8 | 12990090  | 12990914  | DLC1           | ENSG00000164741 | 296   | 0.34 | 0.25 | 0.14  | 0.088 | NA |
| chr8 | 77912132  | 77913057  | PEX2           | ENSG00000164751 | -132  | 0.29 | 0.19 | 0.14  | 0.099 | NA |
| chr8 | 80677581  | 80677996  | HEY1           | ENSG00000164683 | 922   | 0.37 | 0.18 | 0.14  | 0.19  | NA |
| chr8 | 91657389  | 91658779  | TMEM64         | ENSG00000180694 | -344  | 0.3  | 0.19 | 0.14  | 0.11  | NA |

|      |           |           |               |                 |      |      |      |      |        |    |
|------|-----------|-----------|---------------|-----------------|------|------|------|------|--------|----|
| chr8 | 144450376 | 144451557 | C8orf51       | ENSG00000254389 | -248 | 0.37 | 0.25 | 0.14 | 0.12   | NA |
| chr8 | 145133199 | 145134040 | EXOSC4        | ENSG00000178896 | 90   | 0.24 | 0.17 | 0.14 | 0.064  | NA |
| chr8 | 145925410 | 145926101 | AF186192.2    | ENSG00000255085 | 17   | 0.24 | 0.57 | 0.14 | -0.33  | NA |
| chr8 | 25041795  | 25042820  | DOCK5         | ENSG00000147459 | 69   | 0.27 | 0.22 | 0.15 | 0.053  | NA |
| chr8 | 55047705  | 55048005  | MRPL15        | ENSG00000137547 | 85   | 0.36 | 0.25 | 0.15 | 0.12   | NA |
| chr8 | 127568676 | 127570873 | RP11-103H7.5  | ENSG00000254010 | 633  | 0.3  | 0.25 | 0.15 | 0.055  | NA |
| chr8 | 144332365 | 144332743 | ZFP41         | ENSG00000181638 | -770 | 0.96 | 0.99 | 0.15 | -0.033 | NA |
| chr8 | 104426894 | 104427823 | DCAF13        | ENSG00000164934 | 416  | 0.19 | 0.24 | 0.16 | -0.057 | NA |
| chr8 | 131028491 | 131029095 | FAM49B        | ENSG00000153310 | -142 | 0.27 | 0.2  | 0.17 | 0.073  | NA |
| chr8 | 91997230  | 91997906  | RP11-122A3.2  | ENSG00000253250 | -83  | 0.5  | 0.21 | 0.18 | 0.29   | NA |
| chr8 | 99956558  | 99957023  | OSR2          | ENSG00000164920 | 159  | 0.32 | 0.17 | 0.18 | 0.14   | NA |
| chr8 | 57123572  | 57124997  | PLAG1         | ENSG00000181690 | -446 | 0.25 | 0.18 | 0.19 | 0.067  | NA |
| chr8 | 145662143 | 145662383 | AC084125.4    | ENSG00000232600 | -795 | 0.97 | 0.83 | 0.19 | 0.13   | NA |
| chr8 | 21914275  | 21914525  | EPB49         | ENSG00000158856 | -16  | 0.59 | 0.36 | 0.2  | 0.23   | NA |
| chr8 | 26240290  | 26241017  | BNIP3L        | ENSG00000104765 | 239  | 0.29 | 0.21 | 0.21 | 0.081  | NA |
| chr8 | 37962449  | 37963453  | ASH2L         | ENSG00000129691 | 191  | 0.3  | 0.23 | 0.21 | 0.071  | NA |
| chr8 | 110987857 | 110988072 | KCNV1         | ENSG00000164794 | 112  | 0.5  | 0.27 | 0.21 | 0.23   | NA |
| chr8 | 145634390 | 145635222 | CPSF1         | ENSG00000071894 | -241 | 0.23 | 0.18 | 0.21 | 0.052  | NA |
| chr8 | 4848968   | 4852635   | CSMD1         | ENSG00000183117 | 1137 | 0.3  | 0.26 | 0.22 | 0.04   | NA |
| chr8 | 29940142  | 29940699  | TMEM66        | ENSG00000133872 | 44   | 0.24 | 0.33 | 0.22 | -0.089 | NA |
| chr8 | 42995248  | 42995519  | HGSNAT        | ENSG00000165102 | -173 | 0.16 | 0.3  | 0.22 | -0.14  | NA |
| chr8 | 49468683  | 49468959  | RP11-567J20.2 | ENSG00000253688 | 180  | 0.27 | 0.18 | 0.22 | 0.094  | NA |
| chr8 | 19170999  | 19172056  | SH2D4A        | ENSG00000104611 | 399  | 0.32 | 0.25 | 0.23 | 0.064  | NA |
| chr8 | 33580364  | 33580600  | VENTXP5       | ENSG00000253569 | 115  | 0.94 | 0.99 | 0.23 | -0.053 | NA |
| chr8 | 145690605 | 145692505 | CYHR1         | ENSG00000187954 | -744 | 0.26 | 0.21 | 0.23 | 0.043  | NA |
| chr8 | 145597414 | 145598588 | ADCK5         | ENSG00000173137 | 475  | 0.27 | 0.23 | 0.24 | 0.04   | NA |
| chr8 | 145063919 | 145065386 | PARP10        | ENSG00000178685 | -499 | 0.27 | 0.22 | 0.25 | 0.055  | NA |
| chr8 | 145235202 | 145235442 | HEATR7A       | ENSG00000179832 | 964  | 0.83 | 0.97 | 0.25 | -0.14  | NA |
| chr8 | 1771361   | 1772760   | ARHGEF10      | ENSG00000104728 | -82  | 0.24 | 0.19 | 0.26 | 0.05   | NA |
| chr8 | 60032532  | 60032746  | RP11-25K19.1  | ENSG00000167912 | 134  | 0.18 | 0.28 | 0.27 | -0.1   | NA |

|      |           |           |               |                 |       |      |      |      |        |    |
|------|-----------|-----------|---------------|-----------------|-------|------|------|------|--------|----|
| chr8 | 80679669  | 80681007  | HEY1          | ENSG00000164683 | -631  | 0.3  | 0.22 | 0.27 | 0.076  | NA |
| chr8 | 144462630 | 144462954 | RHPN1         | ENSG00000158106 | 1285  | 0.5  | 0.87 | 0.27 | -0.37  | NA |
| chr8 | 144699233 | 144700481 | TSTA3         | ENSG00000104522 | -387  | 0.27 | 0.22 | 0.27 | 0.046  | NA |
| chr8 | 144696328 | 144696808 | TSTA3         | ENSG00000104522 | -13   | 0.87 | 0.95 | 0.28 | -0.079 | NA |
| chr8 | 22457123  | 22457753  | C8orf58       | ENSG00000241852 | 278   | 0.33 | 0.52 | 0.3  | -0.19  | NA |
| chr8 | 142318353 | 142319155 | SLC45A4       | ENSG0000022567  | -363  | 0.49 | 0.4  | 0.3  | 0.085  | NA |
| chr8 | 144798487 | 144799038 | MAPK15        | ENSG00000181085 | 252   | 0.3  | 0.19 | 0.3  | 0.11   | NA |
| chr8 | 26148757  | 26149453  | PPP2R2A       | ENSG00000221914 | 98    | 0.24 | 0.18 | 0.32 | 0.056  | NA |
| chr8 | 74790342  | 74791412  | UBE2W         | ENSG00000104343 | 183   | 0.23 | 0.19 | 0.32 | 0.037  | NA |
| chr8 | 124084902 | 124085318 | WDR67         | ENSG00000156787 | 190   | 0.24 | 0.17 | 0.32 | 0.076  | NA |
| chr8 | 25899335  | 25899692  | EBF2          | ENSG00000221818 | -509  | 0.81 | 0.73 | 0.33 | 0.079  | NA |
| chr8 | 63056947  | 63057412  | CTD-2571E19.3 | ENSG00000237810 | 149   | 0.92 | 0.96 | 0.33 | -0.045 | NA |
| chr8 | 63998227  | 63998737  | TTPA          | ENSG00000137561 | 126   | 0.26 | 0.19 | 0.33 | 0.07   | NA |
| chr8 | 144921644 | 144921914 | NRBP2         | ENSG00000185189 | 422   | 0.91 | 0.83 | 0.33 | 0.084  | NA |
| chr8 | 82023855  | 82024483  | PAG1          | ENSG00000076641 | 134   | 0.26 | 0.18 | 0.34 | 0.08   | NA |
| chr8 | 22132791  | 22133357  | PIWIL2        | ENSG00000197181 | 264   | 0.95 | 0.91 | 0.35 | 0.04   | NA |
| chr8 | 73920858  | 73921552  | TERF1         | ENSG00000147601 | 106   | 0.25 | 0.19 | 0.35 | 0.051  | NA |
| chr8 | 88886171  | 88886445  | DCAF4L2       | ENSG00000176566 | -12   | 0.96 | 0.99 | 0.35 | -0.032 | NA |
| chr8 | 1495105   | 1495333   | DLGAP2        | ENSG00000198010 | -1591 | 1    | 0.95 | 0.36 | 0.053  | NA |
| chr8 | 16859044  | 16859452  | FGF20         | ENSG00000078579 | 101   | 0.22 | 0.17 | 0.36 | 0.052  | NA |
| chr8 | 86350765  | 86351196  | CA3           | ENSG00000164879 | -76   | 0.44 | 0.35 | 0.36 | 0.096  | NA |
| chr8 | 144872530 | 144873040 | SCRIB         | ENSG00000180900 | 927   | 0.67 | 0.76 | 0.36 | -0.09  | NA |
| chr8 | 69242920  | 69243803  | C8orf34       | ENSG00000165084 | 404   | 0.22 | 0.17 | 0.37 | 0.042  | NA |
| chr8 | 117886284 | 117887319 | RAD21         | ENSG00000164754 | -234  | 0.27 | 0.21 | 0.37 | 0.061  | NA |
| chr8 | 144328103 | 144329545 | ZFP41         | ENSG00000181638 | -167  | 0.25 | 0.19 | 0.37 | 0.063  | NA |
| chr8 | 144923490 | 144923808 | NRBP2         | ENSG00000185189 | -503  | 0.52 | 0.4  | 0.37 | 0.12   | NA |
| chr8 | 11058624  | 11058844  | XKR6          | ENSG00000171044 | 114   | 0.5  | 0.25 | 0.38 | 0.25   | NA |
| chr8 | 17354321  | 17355250  | SLC7A2        | ENSG00000003989 | 188   | 0.26 | 0.21 | 0.38 | 0.053  | NA |
| chr8 | 41908373  | 41909581  | MYST3         | ENSG00000083168 | 528   | 0.38 | 0.27 | 0.38 | 0.12   | NA |
| chr8 | 39380225  | 39380533  | ADAM3A        | ENSG00000197475 | -50   | 0.94 | 0.97 | 0.39 | -0.034 | NA |

|      |           |           |                |                 |      |      |      |      |        |    |
|------|-----------|-----------|----------------|-----------------|------|------|------|------|--------|----|
| chr8 | 28748070  | 28748431  | HMBOX1         | ENSG00000147421 | 108  | 0.3  | 0.19 | 0.4  | 0.11   | NA |
| chr8 | 43131177  | 43131487  | RP11-726G23.10 | ENSG00000234713 | 634  | 0.56 | 0.46 | 0.42 | 0.098  | NA |
| chr8 | 48172791  | 48172993  | KIAA0146       | ENSG00000164808 | -275 | 0.92 | 0.83 | 0.42 | 0.089  | NA |
| chr8 | 50822270  | 50822860  | SNTG1          | ENSG00000147481 | 216  | 0.46 | 0.36 | 0.42 | 0.1    | NA |
| chr8 | 87354544  | 87355446  | WWP1           | ENSG00000123124 | 28   | 0.28 | 0.24 | 0.42 | 0.047  | NA |
| chr8 | 143407246 | 143408048 | TSNARE1        | ENSG00000171045 | -61  | 0.97 | 0.99 | 0.42 | -0.021 | NA |
| chr8 | 11204825  | 11205689  | AF131216.5     | ENSG00000255020 | -246 | 0.32 | 0.26 | 0.44 | 0.054  | NA |
| chr8 | 27950470  | 27950868  | ELP3           | ENSG00000134014 | 50   | 0.33 | 0.17 | 0.44 | 0.16   | NA |
| chr8 | 21776842  | 21777942  | XPO7           | ENSG00000130227 | 212  | 0.22 | 0.19 | 0.46 | 0.031  | NA |
| chr8 | 54755576  | 54756109  | ATP6V1H        | ENSG00000047249 | -265 | 0.19 | 0.26 | 0.46 | -0.064 | NA |
| chr8 | 67025345  | 67025599  | AC084082.3     | ENSG00000253190 | -50  | 0.2  | 0.25 | 0.47 | -0.057 | NA |
| chr8 | 25315286  | 25317028  | KCTD9          | ENSG00000104756 | -361 | 0.27 | 0.24 | 0.48 | 0.032  | NA |
| chr8 | 56685492  | 56686207  | TMEM68         | ENSG00000167904 | -169 | 0.22 | 0.18 | 0.48 | 0.043  | NA |
| chr8 | 21946568  | 21946809  | FAM160B2       | ENSG00000158863 | 18   | 0.29 | 0.18 | 0.5  | 0.11   | NA |
| chr8 | 42249055  | 42249849  | VDAC3          | ENSG00000078668 | 310  | 0.25 | 0.21 | 0.51 | 0.043  | NA |
| chr8 | 145745783 | 145746029 | LRRC14         | ENSG00000160959 | 1255 | 0.87 | 0.92 | 0.51 | -0.049 | NA |
| chr8 | 9762661   | 9764748   | RP11-403C10.2  | ENSG00000253230 | -828 | 0.27 | 0.25 | 0.52 | 0.022  | NA |
| chr8 | 10697016  | 10697634  | PINX1          | ENSG00000254093 | -44  | 0.32 | 0.28 | 0.52 | 0.036  | NA |
| chr8 | 38239342  | 38240670  | WHSC1L1        | ENSG00000147548 | -642 | 0.22 | 0.25 | 0.52 | -0.034 | NA |
| chr8 | 74888375  | 74888925  | TMEM70         | ENSG00000175606 | 220  | 0.22 | 0.13 | 0.52 | 0.09   | NA |
| chr8 | 124054057 | 124054733 | WDR67          | ENSG00000156787 | 187  | 0.21 | 0.18 | 0.52 | 0.025  | NA |
| chr8 | 110703409 | 110703897 | SYBU           | ENSG00000147642 | 180  | 0.24 | 0.21 | 0.53 | 0.027  | NA |
| chr8 | 144717866 | 144718798 | ZNF623         | ENSG00000183309 | 149  | 0.23 | 0.28 | 0.54 | -0.052 | NA |
| chr8 | 38033408  | 38034643  | LSM1           | ENSG00000175324 | -19  | 0.41 | 0.45 | 0.55 | -0.035 | NA |
| chr8 | 66753589  | 66754950  | PDE7A          | ENSG00000205268 | -514 | 0.31 | 0.27 | 0.55 | 0.036  | NA |
| chr8 | 144631767 | 144631971 | RP11-661A12.5  | ENSG00000254859 | 30   | 0.73 | 0.63 | 0.55 | 0.1    | NA |
| chr8 | 145653335 | 145654145 | VPS28          | ENSG00000160948 | 186  | 0.25 | 0.21 | 0.55 | 0.039  | NA |
| chr8 | 12808798  | 12809862  | AC135352.2     | ENSG00000250305 | 492  | 0.24 | 0.21 | 0.56 | 0.035  | NA |
| chr8 | 144894918 | 144895169 | MIR937         | ENSG00000216090 | 169  | 0.87 | 0.75 | 0.56 | 0.12   | NA |
| chr8 | 81805955  | 81806327  | AC012533.1     | ENSG00000244833 | -48  | 0.5  | 0.32 | 0.57 | 0.18   | NA |

|      |           |           |               |                 |      |      |      |      |        |    |
|------|-----------|-----------|---------------|-----------------|------|------|------|------|--------|----|
| chr8 | 145103285 | 145108027 | CTD-3065J16.6 | ENSG00000204791 | 1198 | 0.35 | 0.34 | 0.58 | 0.015  | NA |
| chr8 | 144623134 | 144623917 | ZC3H3         | ENSG00000014164 | 98   | 0.26 | 0.22 | 0.59 | 0.04   | NA |
| chr8 | 146016927 | 146018664 | RPL8          | ENSG00000161016 | -451 | 0.26 | 0.29 | 0.59 | -0.031 | NA |
| chr8 | 22456091  | 22456508  | C8orf58       | ENSG00000241852 | -815 | 0.2  | 0.16 | 0.6  | 0.038  | NA |
| chr8 | 107669777 | 107670591 | AC090579.1    | ENSG00000164830 | 288  | 0.3  | 0.27 | 0.6  | 0.033  | NA |
| chr8 | 6691833   | 6693135   | XKR5          | ENSG00000186530 | 536  | 0.35 | 0.3  | 0.61 | 0.049  | NA |
| chr8 | 59323806  | 59324180  | UBXN2B        | ENSG00000215114 | 170  | 0.24 | 0.31 | 0.61 | -0.066 | NA |
| chr8 | 101157647 | 101158215 | FBXO43        | ENSG00000156509 | -262 | 0.16 | 0.21 | 0.61 | -0.052 | NA |
| chr8 | 145703038 | 145703902 | PPP1R16A      | ENSG00000160972 | 118  | 0.28 | 0.21 | 0.61 | 0.066  | NA |
| chr8 | 57350947  | 57351285  | PENK          | ENSG00000181195 | -71  | 0.95 | 0.91 | 0.63 | 0.042  | NA |
| chr8 | 144649331 | 144649742 | C8orf73       | ENSG00000204839 | -255 | 0.52 | 0.48 | 0.63 | 0.04   | NA |
| chr8 | 53477544  | 53478627  | FAM150A       | ENSG00000196711 | -117 | 0.25 | 0.27 | 0.64 | -0.021 | NA |
| chr8 | 67940691  | 67940997  | LRRC67        | ENSG00000178125 | -89  | 0.26 | 0.23 | 0.64 | 0.035  | NA |
| chr8 | 22089367  | 22089668  | PHYHIP        | ENSG00000168490 | 65   | 0.25 | 0.18 | 0.65 | 0.07   | NA |
| chr8 | 145700238 | 145700822 | FOXH1         | ENSG00000160973 | 676  | 0.31 | 0.28 | 0.65 | 0.031  | NA |
| chr8 | 105600453 | 105601704 | LRP12         | ENSG00000147650 | 145  | 0.26 | 0.29 | 0.66 | -0.03  | NA |
| chr8 | 87520573  | 87521116  | FAM82B        | ENSG00000176623 | -186 | 0.18 | 0.15 | 0.67 | 0.028  | NA |
| chr8 | 109455600 | 109456263 | TTC35         | ENSG00000104412 | 101  | 0.25 | 0.17 | 0.67 | 0.083  | NA |
| chr8 | 124408092 | 124409038 | ATAD2         | ENSG00000156802 | 54   | 0.28 | 0.25 | 0.67 | 0.028  | NA |
| chr8 | 19796843  | 19798006  | LPL           | ENSG00000175445 | 541  | 0.37 | 0.4  | 0.68 | -0.027 | NA |
| chr8 | 30515170  | 30516024  | GTF2E2        | ENSG00000197265 | -48  | 0.34 | 0.3  | 0.68 | 0.034  | NA |
| chr8 | 58907001  | 58907822  | FAM110B       | ENSG00000169122 | 343  | 0.19 | 0.17 | 0.68 | 0.028  | NA |
| chr8 | 125486521 | 125487622 | RP11-383J24.5 | ENSG00000245149 | -476 | 0.25 | 0.23 | 0.68 | 0.026  | NA |
| chr8 | 94767000  | 94767214  | TMEM67        | ENSG00000164953 | 35   | 0.23 | 0.17 | 0.7  | 0.062  | NA |
| chr8 | 22462092  | 22462868  | KIAA1967      | ENSG00000158941 | 335  | 0.26 | 0.25 | 0.71 | 0.019  | NA |
| chr8 | 143359844 | 143360110 | TSNARE1       | ENSG00000171045 | 1381 | 0.75 | 0.7  | 0.71 | 0.051  | NA |
| chr8 | 144642609 | 144643132 | GSDMD         | ENSG00000104518 | 72   | 0.76 | 0.72 | 0.72 | 0.034  | NA |
| chr8 | 144822011 | 144822805 | RP11-429J17.6 | ENSG00000203499 | 842  | 0.35 | 0.32 | 0.72 | 0.025  | NA |
| chr8 | 144952047 | 144952980 | EPPK1         | ENSG00000227184 | 119  | 0.43 | 0.4  | 0.72 | 0.031  | NA |
| chr8 | 145027911 | 145028352 | PLEC          | ENSG00000178209 | -43  | 0.23 | 0.29 | 0.72 | -0.056 | NA |

|      |           |           |             |                 |      |      |      |      |        |    |
|------|-----------|-----------|-------------|-----------------|------|------|------|------|--------|----|
| chr8 | 17780032  | 17781272  | PCM1        | ENSG00000078674 | 303  | 0.28 | 0.29 | 0.73 | -0.019 | NA |
| chr8 | 33423939  | 33424895  | RNF122      | ENSG00000133874 | 226  | 0.27 | 0.23 | 0.73 | 0.037  | NA |
| chr8 | 133687573 | 133687998 | LRRRC6      | ENSG00000129295 | -14  | 0.22 | 0.12 | 0.73 | 0.098  | NA |
| chr8 | 142237037 | 142237360 | SLC45A4     | ENSG00000022567 | 1471 | 0.94 | 0.97 | 0.73 | -0.025 | NA |
| chr8 | 17941489  | 17942459  | ASAH1       | ENSG00000104763 | -401 | 0.43 | 0.5  | 0.74 | -0.066 | NA |
| chr8 | 81083320  | 81084057  | TPD52       | ENSG00000076554 | -253 | 0.32 | 0.29 | 0.74 | 0.034  | NA |
| chr8 | 122651665 | 122652389 | HAS2-AS1    | ENSG00000248690 | -115 | 0.16 | 0.2  | 0.74 | -0.039 | NA |
| chr8 | 33456915  | 33457515  | DUSP26      | ENSG00000133878 | 281  | 0.33 | 0.2  | 0.75 | 0.13   | NA |
| chr8 | 57025546  | 57026543  | MOS         | ENSG00000172680 | 497  | 0.43 | 0.39 | 0.75 | 0.047  | NA |
| chr8 | 65488536  | 65489116  | RP11-21C4.1 | ENSG00000254102 | 994  | 0.28 | 0.2  | 0.75 | 0.083  | NA |
| chr8 | 67578694  | 67579509  | VCPIP1      | ENSG00000175073 | 351  | 0.3  | 0.33 | 0.75 | -0.032 | NA |
| chr8 | 93977793  | 93978469  | C8orf83     | ENSG00000205133 | -314 | 0.3  | 0.24 | 0.75 | 0.062  | NA |
| chr8 | 101170161 | 101170827 | SPAG1       | ENSG00000104450 | 231  | 0.28 | 0.25 | 0.75 | 0.029  | NA |
| chr8 | 144640396 | 144640772 | GSDMD       | ENSG00000104518 | 107  | 0.24 | 0.28 | 0.75 | -0.042 | NA |
| chr8 | 99837461  | 99837936  | STK3        | ENSG00000104375 | 176  | 0.15 | 0.2  | 0.76 | -0.047 | NA |
| chr8 | 143484018 | 143485051 | TSNARE1     | ENSG00000171045 | -285 | 0.22 | 0.24 | 0.77 | -0.017 | NA |
| chr8 | 144372931 | 144373839 | ZNF696      | ENSG00000185730 | 305  | 0.2  | 0.17 | 0.77 | 0.028  | NA |
| chr8 | 144885269 | 144886103 | SCRIB       | ENSG00000180900 | 635  | 0.92 | 0.94 | 0.77 | -0.025 | NA |
| chr8 | 146277801 | 146278396 | C8orf33     | ENSG00000182307 | 247  | 0.4  | 0.34 | 0.77 | 0.06   | NA |
| chr8 | 12989380  | 12989635  | DLC1        | ENSG00000164741 | 1291 | 0.29 | 0.46 | 0.78 | -0.18  | NA |
| chr8 | 23145528  | 23146006  | R3HCC1      | ENSG00000104679 | 130  | 0.21 | 0.18 | 0.78 | 0.025  | NA |
| chr8 | 27631846  | 27632323  | ESCO2       | ENSG00000171320 | 181  | 0.29 | 0.37 | 0.78 | -0.083 | NA |
| chr8 | 41507516  | 41507868  | NKX6-3      | ENSG00000165066 | 319  | 0.94 | 0.96 | 0.78 | -0.021 | NA |
| chr8 | 145687389 | 145687880 | CYHR1       | ENSG00000187954 | 164  | 0.36 | 0.29 | 0.78 | 0.072  | NA |
| chr8 | 145830699 | 145831212 | ARHGAP39    | ENSG00000147799 | 129  | 0.96 | 0.98 | 0.78 | -0.021 | NA |
| chr8 | 124428605 | 124429425 | WDYHV1      | ENSG00000156795 | 50   | 0.36 | 0.31 | 0.79 | 0.047  | NA |
| chr8 | 144441870 | 144442438 | TOP1MT      | ENSG00000184428 | -60  | 0.9  | 0.91 | 0.79 | -0.012 | NA |
| chr8 | 86573421  | 86575248  | REXO1L1     | ENSG00000205176 | 1392 | 0.94 | 0.96 | 0.8  | -0.023 | NA |
| chr8 | 145616814 | 145619875 | MIR939      | ENSG00000216133 | 1101 | 0.93 | 0.94 | 0.8  | -0.011 | NA |
| chr8 | 75262521  | 75263044  | GDAP1       | ENSG00000104381 | 165  | 0.22 | 0.17 | 0.81 | 0.051  | NA |



|      |           |           |               |                 |       |      |      |      |        |    |
|------|-----------|-----------|---------------|-----------------|-------|------|------|------|--------|----|
| chr8 | 99057537  | 99057900  | RPL30         | ENSG00000156482 | 24    | 0.32 | 0.29 | 0.81 | 0.027  | NA |
| chr8 | 101117922 | 101118693 | RGS22         | ENSG00000132554 | -117  | 0.26 | 0.23 | 0.81 | 0.03   | NA |
| chr8 | 102138593 | 102139108 | KB-1460A1.1   | ENSG00000253395 | -464  | 0.2  | 0.11 | 0.81 | 0.093  | NA |
| chr8 | 103135914 | 103136775 | NCALD         | ENSG00000104490 | -166  | 0.35 | 0.33 | 0.81 | 0.019  | NA |
| chr8 | 26434372  | 26436785  | DPYSL2        | ENSG00000092964 | 1000  | 0.26 | 0.25 | 0.82 | 0.0098 | NA |
| chr8 | 146175835 | 146176337 | ZNF16         | ENSG00000170631 | -105  | 0.34 | 0.31 | 0.82 | 0.033  | NA |
| chr8 | 9413381   | 9414093   | TNKS          | ENSG00000173273 | 313   | 0.2  | 0.19 | 0.83 | 0.013  | NA |
| chr8 | 23429038  | 23429265  | AC051642.1    | ENSG00000215298 | -1006 | 1    | 0.98 | 0.84 | 0.023  | NA |
| chr8 | 33330164  | 33330878  | FUT10         | ENSG00000172728 | 88    | 0.21 | 0.19 | 0.84 | 0.027  | NA |
| chr8 | 42009723  | 42011098  | AP3M2         | ENSG00000070718 | -54   | 0.24 | 0.26 | 0.84 | -0.017 | NA |
| chr8 | 11550366  | 11550585  | GATA4         | ENSG00000136574 | 340   | 0.33 | 0.19 | 0.85 | 0.14   | NA |
| chr8 | 43126987  | 43127239  | AFG3L2P1      | ENSG00000253606 | -8    | 0.76 | 0.78 | 0.85 | -0.02  | NA |
| chr8 | 63160598  | 63162064  | NKAIN3        | ENSG00000185942 | 181   | 0.24 | 0.25 | 0.85 | -0.015 | NA |
| chr8 | 103666157 | 103668861 | KLF10         | ENSG00000155090 | -906  | 0.23 | 0.22 | 0.85 | 0.0078 | NA |
| chr8 | 144365642 | 144366028 | RP13-582O9.5  | ENSG00000253716 | -1975 | 0.88 | 0.91 | 0.85 | -0.027 | NA |
| chr8 | 41909829  | 41910139  | MYST3         | ENSG00000083168 | -476  | 0.22 | 0.26 | 0.86 | -0.04  | NA |
| chr8 | 42195860  | 42196225  | POLB          | ENSG00000070501 | 70    | 0.18 | 0.5  | 0.86 | -0.32  | NA |
| chr8 | 58172076  | 58173863  | RP11-513O17.3 | ENSG00000253614 | -816  | 0.98 | 1    | 0.86 | -0.024 | NA |
| chr8 | 87526560  | 87527272  | FAM82B        | ENSG00000176623 | -349  | 0.22 | 0.2  | 0.86 | 0.016  | NA |
| chr8 | 128747805 | 128751279 | MYC           | ENSG00000136997 | 1212  | 0.28 | 0.27 | 0.86 | 0.0087 | NA |
| chr8 | 37619779  | 37620770  | PROSC         | ENSG00000147471 | 163   | 0.29 | 0.32 | 0.87 | -0.036 | NA |
| chr8 | 81398429  | 81399618  | ZBTB10        | ENSG00000205189 | 575   | 0.21 | 0.2  | 0.87 | 0.013  | NA |
| chr8 | 98656153  | 98657230  | MTDH          | ENSG00000147649 | 284   | 0.23 | 0.24 | 0.87 | -0.013 | NA |
| chr8 | 79578112  | 79578667  | FAM164A       | ENSG00000104427 | 107   | 0.17 | 0.12 | 0.88 | 0.043  | NA |
| chr8 | 80942117  | 80942593  | MRPS28        | ENSG00000147586 | -208  | 0.29 | 0.27 | 0.89 | 0.027  | NA |
| chr8 | 95731798  | 95732449  | DPY19L4       | ENSG00000156162 | 192   | 0.29 | 0.24 | 0.89 | 0.051  | NA |
| chr8 | 135843698 | 135845068 | AC083843.2    | ENSG00000254028 | -607  | 0.23 | 0.24 | 0.89 | -0.011 | NA |
| chr8 | 15397636  | 15398287  | TUSC3         | ENSG00000104723 | 229   | 0.22 | 0.21 | 0.9  | 0.013  | NA |
| chr8 | 28351456  | 28352560  | FZD3          | ENSG00000104290 | 279   | 0.31 | 0.3  | 0.9  | 0.0091 | NA |
| chr8 | 48173260  | 48174091  | KIAA0146      | ENSG00000164808 | 170   | 0.56 | 0.45 | 0.91 | 0.1    | NA |

|      |           |           |                |                 |      |      |      |      |         |    |
|------|-----------|-----------|----------------|-----------------|------|------|------|------|---------|----|
| chr8 | 15094237  | 15095168  | SGCZ           | ENSG00000185053 | 1146 | 0.18 | 0.19 | 0.92 | -0.011  | NA |
| chr8 | 109094485 | 109095849 | RSPO2          | ENSG00000147655 | -103 | 0.27 | 0.26 | 0.92 | 0.014   | NA |
| chr8 | 90769535  | 90770457  | RP11-37B2.1    | ENSG00000251136 | -404 | 0.35 | 0.33 | 0.93 | 0.02    | NA |
| chr8 | 100025146 | 100025999 | RP11-410L14.2  | ENSG00000253948 | -300 | 0.25 | 0.23 | 0.93 | 0.023   | NA |
| chr8 | 11549858  | 11550166  | GATA4          | ENSG00000136574 | -123 | 0.25 | 0.31 | 0.94 | -0.058  | NA |
| chr8 | 11627091  | 11627668  | NEIL2          | ENSG00000154328 | 235  | 0.24 | 0.26 | 0.94 | -0.015  | NA |
| chr8 | 67025850  | 67026118  | AC084082.3     | ENSG00000253190 | 462  | 0.21 | 0.19 | 0.94 | 0.015   | NA |
| chr8 | 68864584  | 68864946  | PREX2          | ENSG00000046889 | 162  | 0.24 | 0.21 | 0.94 | 0.021   | NA |
| chr8 | 19614131  | 19615307  | CSGALNACT1     | ENSG00000147408 | 9    | 0.23 | 0.24 | 0.95 | -0.0089 | NA |
| chr8 | 38126097  | 38127032  | PPAPDC1B       | ENSG00000147535 | -107 | 0.19 | 0.21 | 0.95 | -0.017  | NA |
| chr8 | 57359899  | 57360114  | PENK           | ENSG00000181195 | -713 | 0.36 | 0.34 | 0.95 | 0.016   | NA |
| chr8 | 27695095  | 27695479  | PBK            | ENSG00000168078 | 13   | 0.32 | 0.35 | 0.96 | -0.03   | NA |
| chr8 | 144917878 | 144918318 | NRBP2          | ENSG00000185189 | 1206 | 0.95 | 1    | 0.96 | -0.053  | NA |
| chr8 | 68255129  | 68256274  | ARFGEF1        | ENSG00000066777 | 211  | 0.24 | 0.23 | 0.97 | 0.0099  | NA |
| chr8 | 67340796  | 67342111  | RP11-346I3.4   | ENSG00000246145 | -241 | 0.23 | 0.24 | 0.98 | -0.0065 | NA |
| chr8 | 144766496 | 144766993 | ZNF707         | ENSG00000181135 | 122  | 0.27 | 0.29 | 0.99 | -0.017  | NA |
| chr8 | 77594255  | 77594860  | ZFHX4          | ENSG00000091656 | -205 | 0.19 | 0.22 | 1    | -0.03   | NA |
| chr8 | 28573597  | 28573840  | EXTL3          | ENSG00000012232 | -484 | 0.97 | 0.95 | 1    | 0.016   | NA |
| chr8 | 181838    | 182862    | ZNF596         | ENSG00000172748 | 213  | 0.14 | 0.2  | 1    | -0.057  | NA |
| chr8 | 663998    | 664794    | ERICH1         | ENSG00000104714 | 1531 | 1    | 1    | 1    | 0       | NA |
| chr8 | 2046691   | 2046963   | MYOM2          | ENSG00000036448 | 952  | 0.96 | 1    | 1    | -0.037  | NA |
| chr8 | 6263582   | 6264293   | RP11-115C21.2  | ENSG00000246089 | 132  | 0.27 | 0.26 | 1    | 0.006   | NA |
| chr8 | 7812520   | 7812938   | FAM66E         | ENSG00000225725 | 193  | 1    | 0.56 | 1    | 0.44    | NA |
| chr8 | 9760750   | 9761643   | RP11-403C10.2  | ENSG00000253230 | -357 | 0.33 | 0.35 | 1    | -0.013  | NA |
| chr8 | 11323779  | 11324697  | FAM167A        | ENSG00000154319 | 6    | 0.24 | 0.24 | 1    | -0.0035 | NA |
| chr8 | 11872118  | 11872779  | RP11-481A20.11 | ENSG00000255098 | 595  | 0.18 | 0.17 | 1    | 0.016   | NA |
| chr8 | 12219511  | 12219916  | FAM66A         | ENSG00000227888 | 186  | 0.17 | 0.08 | 1    | 0.087   | NA |
| chr8 | 17103890  | 17104863  | CNOT7          | ENSG00000198791 | -419 | 0.28 | 0.27 | 1    | 0.0065  | NA |
| chr8 | 17434648  | 17434954  | PDGFRL         | ENSG00000104213 | 100  | 0.2  | 0.19 | 1    | 0.0084  | NA |
| chr8 | 21905461  | 21905757  | EPB49          | ENSG00000158856 | -897 | 1    | 1    | 1    | 0       | NA |

|      |           |           |                |                 |       |      |      |   |          |    |
|------|-----------|-----------|----------------|-----------------|-------|------|------|---|----------|----|
| chr8 | 23081956  | 23082975  | RP11-1149O23.3 | ENSG00000246582 | 481   | 0.27 | 0.28 | 1 | -0.01    | NA |
| chr8 | 23103775  | 23104601  | CHMP7          | ENSG00000147457 | 38    | 0.33 | 0.21 | 1 | 0.12     | NA |
| chr8 | 25900562  | 25905842  | EBF2           | ENSG00000221818 | -508  | 0.31 | 0.31 | 1 | 0.0017   | NA |
| chr8 | 27348658  | 27348883  | EPHX2          | ENSG00000120915 | 102   | 0.26 | 0.26 | 1 | -0.0009  | NA |
| chr8 | 27490959  | 27491775  | SCARA3         | ENSG00000168077 | -18   | 0.31 | 0.28 | 1 | 0.026    | NA |
| chr8 | 27779081  | 27779767  | SCARA5         | ENSG00000168079 | 297   | 1    | 0.93 | 1 | 0.067    | NA |
| chr8 | 28243684  | 28244283  | ZNF395         | ENSG00000186918 | -38   | 0.5  | 0.36 | 1 | 0.14     | NA |
| chr8 | 30013700  | 30014360  | DCTN6          | ENSG00000104671 | 217   | 0.25 | 0.17 | 1 | 0.083    | NA |
| chr8 | 40755164  | 40755404  | ZMAT4          | ENSG00000165061 | 42    | 0.24 | 0.26 | 1 | -0.017   | NA |
| chr8 | 42128689  | 42129141  | RP11-231D20.2  | ENSG00000253408 | -200  | 0.26 | 0.25 | 1 | 0.0038   | NA |
| chr8 | 42698430  | 42698723  | THAP1          | ENSG00000131931 | -128  | 0.2  | 0.15 | 1 | 0.047    | NA |
| chr8 | 57905700  | 57906452  | IMPAD1         | ENSG00000104331 | -157  | 0.29 | 0.23 | 1 | 0.06     | NA |
| chr8 | 58192499  | 58192884  | C8orf71        | ENSG00000215117 | 589   | 0.87 | 1    | 1 | -0.13    | NA |
| chr8 | 65286067  | 65286659  | RP11-32K4.2    | ENSG00000254377 | 478   | 0.25 | 0.23 | 1 | 0.016    | NA |
| chr8 | 67524607  | 67526059  | MYBL1          | ENSG00000185697 | -477  | 0.25 | 0.26 | 1 | -0.0032  | NA |
| chr8 | 72987480  | 72988023  | TRPA1          | ENSG00000104321 | 101   | 0.48 | 0.47 | 1 | 0.0039   | NA |
| chr8 | 75896528  | 75897116  | CRISPLD1       | ENSG00000121005 | 72    | 0.27 | 0.26 | 1 | 0.006    | NA |
| chr8 | 81177941  | 81178191  | RP11-941H19.3  | ENSG00000253238 | -323  | 1    | 1    | 1 | 0        | NA |
| chr8 | 81786253  | 81786464  | ZNF704         | ENSG00000164684 | -458  | 0.33 | 0.17 | 1 | 0.16     | NA |
| chr8 | 82598267  | 82598684  | IMPA1          | ENSG00000133731 | -189  | 0.23 | 0.21 | 1 | 0.018    | NA |
| chr8 | 85096759  | 85097247  | RALYL          | ENSG00000184672 | -107  | 0.28 | 0.3  | 1 | -0.016   | NA |
| chr8 | 86019305  | 86019864  | LRRCC1         | ENSG00000133739 | 261   | 0.26 | 0.25 | 1 | 0.019    | NA |
| chr8 | 86157835  | 86158168  | RP11-219B4.5   | ENSG00000258256 | -55   | 0.29 | 0.3  | 1 | -0.0035  | NA |
| chr8 | 86774807  | 86776407  | AC232323.1     | ENSG00000255694 | -1312 | 1    | 1    | 1 | 0        | NA |
| chr8 | 89339965  | 89340481  | RP11-586K2.1   | ENSG00000253553 | 150   | 0.39 | 0.37 | 1 | 0.018    | NA |
| chr8 | 93156337  | 93156640  | RP11-777J24.1  | ENSG00000233778 | 64    | 0.91 | 1    | 1 | -0.091   | NA |
| chr8 | 97171805  | 97172022  | GDF6           | ENSG00000156466 | 1034  | 0.3  | 0.32 | 1 | -0.019   | NA |
| chr8 | 99058245  | 99058673  | RPL30          | ENSG00000156482 | 238   | 0.24 | 0.27 | 1 | -0.029   | NA |
| chr8 | 100905657 | 100906003 | COX6C          | ENSG00000164919 | 20    | 0.25 | 0.25 | 1 | 1.00E-04 | NA |
| chr8 | 101571515 | 101572104 | ANKRD46        | ENSG00000186106 | -55   | 0.21 | 0.21 | 1 | -0.002   | NA |

|      |           |           |               |                 |       |      |      |    |          |    |
|------|-----------|-----------|---------------|-----------------|-------|------|------|----|----------|----|
| chr8 | 103251480 | 103251751 | KB-431C1.4    | ENSG00000246263 | -7    | 0.19 | 0.19 | 1  | -0.0035  | NA |
| chr8 | 116681380 | 116681623 | TRPS1         | ENSG00000104447 | 209   | 0.17 | 0.17 | 1  | -0.0077  | NA |
| chr8 | 117767930 | 117768139 | EIF3H         | ENSG00000147677 | -11   | 0.28 | 0.28 | 1  | -0.0001  | NA |
| chr8 | 117778487 | 117779146 | EIF3H         | ENSG00000147677 | -322  | 0.2  | 0.21 | 1  | -0.0073  | NA |
| chr8 | 119963946 | 119964178 | TNFRSF11B     | ENSG00000164761 | 60    | 0.17 | 0.18 | 1  | -0.0094  | NA |
| chr8 | 119964389 | 119964637 | TNFRSF11B     | ENSG00000164761 | -74   | 0.23 | 0.23 | 1  | 4.00E-04 | NA |
| chr8 | 121137099 | 121137778 | COL14A1       | ENSG00000187955 | 91    | 0.36 | 0.35 | 1  | 0.014    | NA |
| chr8 | 125313572 | 125314097 | RP11-383J24.2 | ENSG00000237586 | 278   | 0.97 | 0.97 | 1  | -0.0049  | NA |
| chr8 | 126010436 | 126011194 | RP11-6D1.3    | ENSG00000253513 | -375  | 0.28 | 0.27 | 1  | 0.0071   | NA |
| chr8 | 142264027 | 142264315 | SLC45A4       | ENSG0000022567  | 54    | 0.94 | 1    | 1  | -0.062   | NA |
| chr8 | 143361313 | 143361642 | TSNARE1       | ENSG00000171045 | -119  | 1    | 1    | 1  | 0        | NA |
| chr8 | 143916135 | 143916405 | RP11-706C16.5 | ENSG00000253728 | -66   | 1    | 0.98 | 1  | 0.02     | NA |
| chr8 | 144461972 | 144462261 | RHPN1         | ENSG00000158106 | 609   | 0.67 | 0.73 | 1  | -0.06    | NA |
| chr8 | 144811237 | 144811446 | FAM83H        | ENSG00000180921 | -531  | 1    | 0.83 | 1  | 0.17     | NA |
| chr8 | 144871986 | 144872261 | RP11-429J17.8 | ENSG00000214733 | 438   | 0.82 | 0.81 | 1  | 0.0076   | NA |
| chr8 | 144887111 | 144887662 | SCRIB         | ENSG00000180900 | -1065 | 0.91 | 0.93 | 1  | -0.018   | NA |
| chr8 | 144922744 | 144923112 | NRBP2         | ENSG00000185189 | -126  | 0.33 | 0.33 | 1  | -0.0005  | NA |
| chr8 | 145621585 | 145621891 | CPSF1         | ENSG00000071894 | 207   | 0.98 | 0.98 | 1  | 0.0059   | NA |
| chr8 | 145622979 | 145623325 | CPSF1         | ENSG00000071894 | -1207 | 0.98 | 1    | 1  | -0.016   | NA |
| chr8 | 145770743 | 145771165 | ARHGAP39      | ENSG00000147799 | 94    | 0.98 | 0.98 | 1  | 0.0018   | NA |
| chr8 | 146277254 | 146277491 | C8orf33       | ENSG00000182307 | -392  | 0.43 | 1    | 1  | -0.57    | NA |
| chr8 | 2480425   | 2480920   | RP11-378A12.1 | ENSG00000249694 | -219  | 0.5  | NA   | NA | NA       | NA |
| chr8 | 8085016   | 8086608   | RP11-556O5.5  | ENSG00000253893 | -427  | 0.42 | NA   | NA | NA       | NA |
| chr8 | 8820766   | 8821112   | RP11-62H7.2   | ENSG00000233609 | 1519  | NA   | 0.38 | NA | NA       | NA |
| chr8 | 19459905  | 19460137  | CSGALNACT1    | ENSG00000147408 | -15   | 1    | NA   | NA | NA       | NA |
| chr8 | 21644908  | 21647845  | GFRA2         | ENSG00000168546 | -705  | NA   | 1    | NA | NA       | NA |
| chr8 | 41503916  | 41504266  | NKX6-3        | ENSG00000165066 | 787   | 0.5  | NA   | NA | NA       | NA |
| chr8 | 86132421  | 86133003  | C8orf59       | ENSG00000176731 | -144  | 0.36 | NA   | NA | NA       | NA |
| chr8 | 98636694  | 98636904  | KB-1683C8.1   | ENSG00000213750 | 508   | NA   | 1    | NA | NA       | NA |
| chr8 | 117950472 | 117950717 | C8orf85       | ENSG00000205002 | 156   | 0.26 | NA   | NA | NA       | NA |

|      |           |           |               |                 |       |      |      |          |       |    |
|------|-----------|-----------|---------------|-----------------|-------|------|------|----------|-------|----|
| chr8 | 121135864 | 121136141 | COL14A1       | ENSG00000187955 | -1345 | 0.43 | NA   | NA       | NA    | NA |
| chr8 | 142183432 | 142183767 | DENND3        | ENSG00000105339 | -5    | 1    | NA   | NA       | NA    | NA |
| chr8 | 143485413 | 143485699 | TSNARE1       | ENSG00000171045 | -955  | 0.53 | NA   | NA       | NA    | NA |
| chr8 | 143530645 | 143530872 | BAI1          | ENSG00000181790 | -33   | NA   | 0.5  | NA       | NA    | NA |
| chr8 | 145490233 | 145491044 | SCXA          | ENSG00000188686 | 89    | NA   | 1    | NA       | NA    | NA |
| chr8 | 145641915 | 145642118 | SLC39A4       | ENSG00000147804 | -120  | 0.5  | NA   | NA       | NA    | NA |
| chr8 | 145688281 | 145688537 | CYHR1         | ENSG00000187954 | -165  | NA   | 0.5  | NA       | NA    | NA |
| chr9 | 131418671 | 131419447 | WDR34         | ENSG00000119333 | -99   | 0.44 | 0.12 | 3.10E-09 | 0.32  | NA |
| chr9 | 110249748 | 110252660 | KLF4          | ENSG00000136826 | -476  | 0.31 | 0.19 | 5.50E-09 | 0.11  | NA |
| chr9 | 2047212   | 2047801   | RP11-264I13.2 | ENSG00000236199 | -1483 | 0.94 | 0.48 | 8.60E-09 | 0.46  | NA |
| chr9 | 68413652  | 68413912  | RP11-764K9.2  | ENSG00000232815 | 414   | 0.4  | 0.27 | 8.80E-09 | 0.13  | NA |
| chr9 | 98278128  | 98279754  | PTCH1         | ENSG00000185920 | -1    | 0.34 | 0.17 | 3.60E-08 | 0.17  | NA |
| chr9 | 124360438 | 124362382 | DAB2IP        | ENSG00000136848 | 863   | 0.35 | 0.2  | 3.70E-08 | 0.16  | NA |
| chr9 | 139142010 | 139142288 | CR392000.1    | ENSG00000232317 | 325   | 0.38 | 0.96 | 3.70E-08 | -0.57 | NA |
| chr9 | 131936269 | 131941021 | RP11-247A12.2 | ENSG00000204055 | -405  | 0.28 | 0.18 | 7.80E-08 | 0.098 | NA |
| chr9 | 38487602  | 38488284  | RP11-392E22.1 | ENSG00000229511 | 392   | 0.85 | 0.65 | 1.20E-07 | 0.2   | NA |
| chr9 | 136131001 | 136131831 | ABO           | ENSG00000175164 | -145  | 0.77 | 0.95 | 1.20E-07 | -0.18 | NA |
| chr9 | 96713326  | 96718186  | BARX1         | ENSG00000131668 | -43   | 0.35 | 0.23 | 1.30E-07 | 0.12  | NA |
| chr9 | 140093882 | 140095686 | TPRN          | ENSG00000176058 | -227  | 0.29 | 0.15 | 1.70E-07 | 0.14  | NA |
| chr9 | 38526666  | 38526954  | RP11-392E22.3 | ENSG00000243085 | -18   | 0.91 | 0.59 | 4.50E-07 | 0.32  | NA |
| chr9 | 69147116  | 69148171  | PGM5P2        | ENSG00000227558 | -149  | 1    | 0.15 | 5.70E-07 | 0.85  | NA |
| chr9 | 133805004 | 133805453 | FIBCD1        | ENSG00000130720 | 138   | 0.99 | 0.67 | 6.00E-07 | 0.32  | NA |
| chr9 | 21970913  | 21971190  | CDKN2A        | ENSG00000147889 | 156   | 0.62 | 0.12 | 1.10E-06 | 0.5   | NA |
| chr9 | 32782936  | 32783625  | TMEM215       | ENSG00000188133 | -217  | 0.16 | 0.31 | 1.30E-06 | -0.15 | NA |
| chr9 | 126132998 | 126133253 | CRB2          | ENSG00000148204 | 1957  | 0.92 | 0.65 | 1.50E-06 | 0.27  | NA |
| chr9 | 139886312 | 139887180 | C9orf142      | ENSG00000148362 | -124  | 0.38 | 0.18 | 1.70E-06 | 0.2   | NA |
| chr9 | 124522246 | 124522546 | DAB2IP        | ENSG00000136848 | -223  | 0.96 | 0.76 | 1.80E-06 | 0.2   | NA |
| chr9 | 139265191 | 139265890 | CARD9         | ENSG00000187796 | -195  | 0.95 | 0.78 | 1.90E-06 | 0.16  | NA |
| chr9 | 4662252   | 4662951   | PPAPDC2       | ENSG00000205808 | 303   | 0.38 | 0.16 | 2.30E-06 | 0.22  | NA |
| chr9 | 133813631 | 133815781 | FIBCD1        | ENSG00000130720 | -469  | 0.27 | 0.17 | 2.60E-06 | 0.1   | NA |

|      |           |           |               |                 |       |      |      |          |        |    |
|------|-----------|-----------|---------------|-----------------|-------|------|------|----------|--------|----|
| chr9 | 33523494  | 33524796  | ANKRD18B      | ENSG00000230453 | -247  | 0.24 | 0.35 | 2.80E-06 | -0.11  | NA |
| chr9 | 100744982 | 100747768 | ANP32B        | ENSG00000136938 | 737   | 0.3  | 0.2  | 3.40E-06 | 0.099  | NA |
| chr9 | 134350708 | 134351708 | PRRC2B        | ENSG00000130723 | -109  | 0.79 | 0.58 | 4.90E-06 | 0.21   | NA |
| chr9 | 130742515 | 130743486 | FAM102A       | ENSG00000167106 | -260  | 0.39 | 0.21 | 6.80E-06 | 0.17   | NA |
| chr9 | 72960     | 73877     | RP11-143M1.2  | ENSG00000225655 | 702   | 0.22 | 0.11 | 6.90E-06 | 0.12   | NA |
| chr9 | 127215291 | 127216022 | GPR144        | ENSG00000180264 | 798   | 0.25 | 0.43 | 7.10E-06 | -0.18  | NA |
| chr9 | 100615234 | 100617510 | FOXE1         | ENSG00000178919 | 836   | 0.3  | 0.19 | 7.30E-06 | 0.11   | NA |
| chr9 | 130166812 | 130167191 | SLC2A8        | ENSG00000136856 | 673   | 0.95 | 0.72 | 8.70E-06 | 0.23   | NA |
| chr9 | 34957717  | 34958472  | KIAA1045      | ENSG00000122733 | -222  | 0.26 | 0.15 | 1.70E-05 | 0.11   | NA |
| chr9 | 136242306 | 136243549 | SURF4         | ENSG00000148248 | -491  | 0.15 | 0.28 | 2.30E-05 | -0.12  | NA |
| chr9 | 139564999 | 139565286 | MIR126        | ENSG00000199161 | 88    | 0.78 | 0.95 | 2.70E-05 | -0.17  | NA |
| chr9 | 116916275 | 116917022 | COL27A1       | ENSG00000196739 | -1192 | 0.19 | 0.45 | 3.10E-05 | -0.26  | NA |
| chr9 | 140330620 | 140330910 | ENTPD8        | ENSG00000188833 | 1933  | 0.46 | 0.8  | 5.20E-05 | -0.34  | NA |
| chr9 | 86431954  | 86433094  | GKAP1         | ENSG00000165113 | -313  | 0.27 | 0.15 | 6.20E-05 | 0.12   | NA |
| chr9 | 137997370 | 137997588 | OLFM1         | ENSG00000130558 | -7    | 0.54 | 0.3  | 6.50E-05 | 0.25   | NA |
| chr9 | 132597219 | 132598321 | C9orf78       | ENSG00000136819 | -237  | 0.18 | 0.33 | 7.00E-05 | -0.15  | NA |
| chr9 | 138985837 | 138987846 | NACC2         | ENSG00000148411 | 290   | 0.39 | 0.27 | 7.40E-05 | 0.12   | NA |
| chr9 | 129622611 | 129623574 | ZBTB34        | ENSG00000177125 | 148   | 0.31 | 0.17 | 8.50E-05 | 0.14   | NA |
| chr9 | 68408548  | 68409592  | CR786580.1    | ENSG00000203508 | 347   | 0.36 | 0.44 | 9.80E-05 | -0.083 | NA |
| chr9 | 140068792 | 140069082 | ANAPC2        | ENSG00000176248 | 1587  | 0.28 | 0.61 | 9.80E-05 | -0.33  | NA |
| chr9 | 124413512 | 124414193 | DAB2IP        | ENSG00000136848 | -21   | 0.38 | 0.15 | 0.00014  | 0.23   | NA |
| chr9 | 13278312  | 13279805  | RP11-272P10.2 | ENSG00000234740 | 128   | 0.31 | 0.18 | 0.00015  | 0.13   | NA |
| chr9 | 21402501  | 21403058  | IFNA12P       | ENSG00000235108 | -301  | 0.2  | 0.67 | 0.00015  | -0.47  | NA |
| chr9 | 140051062 | 140051730 | GRIN1         | ENSG00000176884 | -32   | 0.27 | 0.45 | 0.00015  | -0.18  | NA |
| chr9 | 503936    | 505722    | KANK1         | ENSG00000107104 | 127   | 0.27 | 0.18 | 0.00016  | 0.089  | NA |
| chr9 | 4740694   | 4741868   | AK3           | ENSG00000147853 | -54   | 0.26 | 0.16 | 2.00E-04 | 0.095  | NA |
| chr9 | 99839207  | 99840055  | RP11-520B13.4 | ENSG00000228376 | 497   | 0.48 | 0.33 | 2.00E-04 | 0.15   | NA |
| chr9 | 100174099 | 100174946 | TDRD7         | ENSG00000196116 | 290   | 0.32 | 0.18 | 2.00E-04 | 0.14   | NA |
| chr9 | 124987743 | 124991086 | LHX6          | ENSG00000106852 | 451   | 0.37 | 0.28 | 0.00027  | 0.09   | NA |
| chr9 | 140058048 | 140058432 | GRIN1         | ENSG00000176884 | 1082  | 0.7  | 0.89 | 0.00028  | -0.19  | NA |

|      |           |           |               |                 |      |      |      |          |        |    |
|------|-----------|-----------|---------------|-----------------|------|------|------|----------|--------|----|
| chr9 | 91605764  | 91606141  | C9orf47       | ENSG00000186354 | 174  | 0.39 | 0.61 | 3.00E-04 | -0.22  | NA |
| chr9 | 135645441 | 135646092 | RP11-295G24.5 | ENSG00000224992 | -167 | 0.76 | 0.42 | 0.00037  | 0.35   | NA |
| chr9 | 6412353   | 6414097   | UHRF2         | ENSG00000147854 | 74   | 0.29 | 0.18 | 0.00042  | 0.11   | NA |
| chr9 | 140082465 | 140083853 | ANAPC2        | ENSG00000176248 | -170 | 0.2  | 0.11 | 0.00047  | 0.093  | NA |
| chr9 | 4792556   | 4793553   | RCL1          | ENSG00000120158 | 185  | 0.24 | 0.12 | 0.00051  | 0.11   | NA |
| chr9 | 116111663 | 116112189 | BSPRY         | ENSG00000119411 | 105  | 0.33 | 0.18 | 0.00053  | 0.15   | NA |
| chr9 | 116860473 | 116860695 | KIF12         | ENSG00000136883 | -368 | 0.28 | 0.08 | 0.00057  | 0.19   | NA |
| chr9 | 34376500  | 34377187  | KIAA1161      | ENSG00000164976 | 8    | 0.24 | 1    | 0.00058  | -0.76  | NA |
| chr9 | 97136589  | 97137656  | HIATL1        | ENSG00000148110 | 289  | 0.4  | 0.16 | 0.00064  | 0.24   | NA |
| chr9 | 134000784 | 134001306 | NUP214        | ENSG00000126883 | 97   | 0.24 | 0.13 | 0.00065  | 0.11   | NA |
| chr9 | 124975753 | 124976692 | LHX6          | ENSG00000106852 | -83  | 0.19 | 0.27 | 0.00071  | -0.087 | NA |
| chr9 | 71650646  | 71651176  | FXN           | ENSG00000165060 | 233  | 0.26 | 0.13 | 0.00089  | 0.14   | NA |
| chr9 | 86152353  | 86153777  | FRMD3         | ENSG00000172159 | 288  | 0.2  | 0.14 | 0.00094  | 0.068  | NA |
| chr9 | 70921274  | 70921477  | RP11-561O23.7 | ENSG00000225337 | -934 | 0.3  | 0.11 | 0.001    | 0.19   | NA |
| chr9 | 102668916 | 102669473 | STX17         | ENSG00000136874 | 241  | 0.29 | 0.14 | 0.001    | 0.15   | NA |
| chr9 | 139580969 | 139582615 | AGPAT2        | ENSG00000169692 | 25   | 0.34 | 0.45 | 0.001    | -0.11  | NA |
| chr9 | 94711117  | 94713075  | ROR2          | ENSG00000169071 | -934 | 0.3  | 0.22 | 0.0011   | 0.078  | NA |
| chr9 | 116138954 | 116139306 | HDHD3         | ENSG00000119431 | 75   | 0.18 | 0.48 | 0.0011   | -0.3   | NA |
| chr9 | 125667114 | 125667804 | RC3H2         | ENSG00000056586 | 35   | 0.28 | 0.16 | 0.0011   | 0.12   | NA |
| chr9 | 16870123  | 16872020  | BNC2          | ENSG00000173068 | -403 | 0.4  | 0.23 | 0.0012   | 0.17   | NA |
| chr9 | 130547264 | 130549117 | CDK9          | ENSG00000136807 | 232  | 0.26 | 0.18 | 0.0013   | 0.081  | NA |
| chr9 | 707021    | 707420    | KANK1         | ENSG00000107104 | 331  | 0.38 | 0.22 | 0.0014   | 0.16   | NA |
| chr9 | 139879489 | 139880580 | LCNL1         | ENSG00000214402 | 1580 | 0.34 | 0.45 | 0.0014   | -0.11  | NA |
| chr9 | 74525249  | 74526679  | FAM108B1      | ENSG00000107362 | -306 | 0.23 | 0.14 | 0.0015   | 0.087  | NA |
| chr9 | 139417115 | 139417518 | NOTCH1        | ENSG00000148400 | 1034 | 0.9  | 0.6  | 0.0015   | 0.31   | NA |
| chr9 | 137028717 | 137030556 | RNU6ATAC      | ENSG00000221676 | 50   | 0.25 | 0.17 | 0.0016   | 0.08   | NA |
| chr9 | 89560584  | 89562647  | GAS1          | ENSG00000180447 | 489  | 0.22 | 0.16 | 0.0017   | 0.06   | NA |
| chr9 | 120175253 | 120177496 | ASTN2         | ENSG00000148219 | 842  | 0.26 | 0.18 | 0.0017   | 0.084  | NA |
| chr9 | 35972143  | 35972446  | RP11-327L3.5  | ENSG00000213866 | 21   | 1    | 0.5  | 0.0019   | 0.5    | NA |
| chr9 | 113341213 | 113342029 | SVEP1         | ENSG00000165124 | 202  | 0.27 | 0.16 | 0.0019   | 0.12   | NA |

|      |           |           |               |                 |      |      |      |        |        |    |
|------|-----------|-----------|---------------|-----------------|------|------|------|--------|--------|----|
| chr9 | 124061805 | 124062229 | GSN           | ENSG00000148180 | -54  | 0.53 | 0.16 | 0.002  | 0.37   | NA |
| chr9 | 100954734 | 100955165 | CORO2A        | ENSG00000106789 | -27  | 0.3  | 0.15 | 0.0021 | 0.15   | NA |
| chr9 | 114423569 | 114424308 | GNG10         | ENSG00000242616 | 323  | 0.27 | 0.12 | 0.0022 | 0.15   | NA |
| chr9 | 107509906 | 107510768 | NIPSNAP3A     | ENSG00000136783 | 368  | 0.25 | 0.14 | 0.0023 | 0.1    | NA |
| chr9 | 135455164 | 135458586 | BARHL1        | ENSG00000125492 | -697 | 0.22 | 0.29 | 0.0023 | -0.071 | NA |
| chr9 | 72374408  | 72375103  | PTAR1         | ENSG00000188647 | 102  | 0.34 | 0.75 | 0.0026 | -0.41  | NA |
| chr9 | 123963367 | 123964478 | RAB14         | ENSG00000119396 | 225  | 0.24 | 0.15 | 0.0026 | 0.098  | NA |
| chr9 | 134404317 | 134404560 | UCK1          | ENSG00000130717 | 106  | 0.99 | 0.9  | 0.0026 | 0.092  | NA |
| chr9 | 127615432 | 127615874 | WDR38         | ENSG00000136918 | -102 | 0.09 | 0.57 | 0.0027 | -0.48  | NA |
| chr9 | 132388344 | 132388748 | METTL11A      | ENSG00000148335 | 94   | 0.14 | 0.28 | 0.0027 | -0.14  | NA |
| chr9 | 125590415 | 125590924 | PDCL          | ENSG00000136940 | 241  | 0.36 | 0.17 | 0.003  | 0.2    | NA |
| chr9 | 128469269 | 128469635 | MAPKAP1       | ENSG00000119487 | 4    | 0.29 | 0.14 | 0.003  | 0.15   | NA |
| chr9 | 130564863 | 130565566 | FPGS          | ENSG00000136877 | 60   | 0.3  | 0.15 | 0.003  | 0.15   | NA |
| chr9 | 131965037 | 131965636 | RP11-247A12.2 | ENSG00000204055 | 1742 | 0.33 | 0.17 | 0.003  | 0.16   | NA |
| chr9 | 136150031 | 136151365 | ABO           | ENSG00000175164 | -93  | 0.3  | 0.21 | 0.003  | 0.094  | NA |
| chr9 | 135036713 | 135038933 | NTNG2         | ENSG00000196358 | 489  | 0.22 | 0.29 | 0.0032 | -0.075 | NA |
| chr9 | 21031513  | 21031823  | PTPLAD2       | ENSG00000188921 | -60  | 0.47 | 0.31 | 0.0033 | 0.16   | NA |
| chr9 | 112081402 | 112082905 | EPB41L4B      | ENSG00000095203 | 868  | 0.21 | 0.14 | 0.0033 | 0.068  | NA |
| chr9 | 129372737 | 129378106 | RP11-123K19.1 | ENSG00000224842 | -623 | 0.27 | 0.22 | 0.0037 | 0.052  | NA |
| chr9 | 123836702 | 123837585 | CEP110        | ENSG00000119397 | 2    | 0.19 | 0.35 | 0.004  | -0.16  | NA |
| chr9 | 129677706 | 129678009 | RALGPS1       | ENSG00000136828 | 128  | 0.17 | 0.48 | 0.004  | -0.31  | NA |
| chr9 | 4297817   | 4300182   | GLIS3         | ENSG00000107249 | -503 | 0.3  | 0.23 | 0.0041 | 0.074  | NA |
| chr9 | 128002945 | 128003972 | HSPA5         | ENSG00000044574 | 151  | 0.15 | 0.3  | 0.0041 | -0.15  | NA |
| chr9 | 5437566   | 5437996   | C9orf46       | ENSG00000107020 | -75  | 0.3  | 0.19 | 0.0042 | 0.11   | NA |
| chr9 | 43133116  | 43134845  | ANKRD20A3     | ENSG00000132498 | -652 | 0.67 | 0.24 | 0.0044 | 0.42   | NA |
| chr9 | 139847313 | 139847559 | LCN12         | ENSG00000184925 | 92   | 0.74 | 1    | 0.0044 | -0.26  | NA |
| chr9 | 115480082 | 115480481 | C9orf80       | ENSG00000148153 | 85   | 0.23 | 0.08 | 0.0049 | 0.15   | NA |
| chr9 | 132244401 | 132245732 | RP11-492E3.1  | ENSG00000204054 | -664 | 0.26 | 0.18 | 0.0052 | 0.075  | NA |
| chr9 | 139332839 | 139334501 | INPP5E        | ENSG00000148384 | 604  | 0.17 | 0.25 | 0.0052 | -0.079 | NA |
| chr9 | 131872624 | 131873959 | CRAT          | ENSG00000095321 | -323 | 0.27 | 0.18 | 0.0056 | 0.093  | NA |



|      |           |           |                 |                 |       |      |      |        |        |    |
|------|-----------|-----------|-----------------|-----------------|-------|------|------|--------|--------|----|
| chr9 | 84302139  | 84305001  | TLE1            | ENSG00000196781 | -1287 | 0.22 | 0.17 | 0.006  | 0.051  | NA |
| chr9 | 21994101  | 21995910  | CDKN2A          | ENSG00000147889 | -515  | 0.4  | 0.27 | 0.0063 | 0.13   | NA |
| chr9 | 139008034 | 139008896 | C9orf69         | ENSG00000238227 | -764  | 0.97 | 0.89 | 0.0064 | 0.078  | NA |
| chr9 | 130683969 | 130684370 | PIP5KL1         | ENSG00000167103 | -156  | 0.41 | 0.17 | 0.0067 | 0.24   | NA |
| chr9 | 135116147 | 135117929 | NTNG2           | ENSG00000196358 | 210   | 0.29 | 0.21 | 0.0069 | 0.072  | NA |
| chr9 | 90474180  | 90474478  | XXyac-YM21GA2.7 | ENSG00000214888 | -15   | 0.91 | 0.99 | 0.0071 | -0.077 | NA |
| chr9 | 101469579 | 101472154 | GABBR2          | ENSG00000136928 | 613   | 0.23 | 0.18 | 0.0071 | 0.047  | NA |
| chr9 | 37002489  | 37002957  | PAX5            | ENSG00000196092 | -51   | 0.92 | 0.82 | 0.0074 | 0.1    | NA |
| chr9 | 131709353 | 131710564 | DOLK            | ENSG00000175283 | -94   | 0.26 | 0.16 | 0.0077 | 0.1    | NA |
| chr9 | 127532040 | 127533691 | RP11-175D17.3   | ENSG00000236643 | 463   | 0.23 | 0.17 | 0.008  | 0.068  | NA |
| chr9 | 37464814  | 37466569  | ZBTB5           | ENSG00000168795 | -295  | 0.2  | 0.3  | 0.008  | -0.099 | NA |
| chr9 | 80262446  | 80263701  | GNA14           | ENSG00000156049 | 150   | 0.31 | 0.22 | 0.008  | 0.094  | NA |
| chr9 | 138591283 | 138591504 | SOHLH1          | ENSG00000165643 | -19   | 0.82 | 0.98 | 0.008  | -0.16  | NA |
| chr9 | 132258213 | 132259153 | RP11-492E3.1    | ENSG00000204054 | -1935 | 0.23 | 0.14 | 0.0081 | 0.092  | NA |
| chr9 | 140149205 | 140150502 | COBRA1          | ENSG00000188986 | 228   | 0.24 | 0.18 | 0.0083 | 0.06   | NA |
| chr9 | 21802524  | 21802981  | MTAP            | ENSG00000099810 | 117   | 0.2  | 0.37 | 0.0085 | -0.17  | NA |
| chr9 | 129986564 | 129988295 | GARNL3          | ENSG00000136895 | 679   | 0.24 | 0.18 | 0.0086 | 0.063  | NA |
| chr9 | 41954478  | 41954842  | RP11-104G3.2    | ENSG00000229273 | 80    | 0.25 | 0.14 | 0.0091 | 0.11   | NA |
| chr9 | 66493170  | 66494106  | RP11-262H14.5   | ENSG00000229422 | 558   | 0.21 | 0.16 | 0.0095 | 0.052  | NA |
| chr9 | 99639589  | 99640054  | ZNF782          | ENSG00000196597 | -1916 | 0.33 | 0.16 | 0.0098 | 0.17   | NA |
| chr9 | 137217062 | 137218078 | RXRA            | ENSG00000186350 | -856  | 0.18 | 0.26 | 0.01   | -0.078 | NA |
| chr9 | 21559133  | 21559816  | RP11-354P17.9   | ENSG00000171889 | 194   | 0.22 | 0.13 | 0.011  | 0.085  | NA |
| chr9 | 21696487  | 21696754  | KHSRPP1         | ENSG00000229835 | 1445  | 0.84 | 0.69 | 0.011  | 0.15   | NA |
| chr9 | 95857703  | 95859132  | RP11-274J16.5   | ENSG00000223446 | -606  | 0.16 | 0.25 | 0.011  | -0.089 | NA |
| chr9 | 129276571 | 129276977 | RP11-205K6.1    | ENSG00000233721 | -1922 | 0.39 | 0.22 | 0.011  | 0.17   | NA |
| chr9 | 4490262   | 4490916   | SLC1A1          | ENSG00000106688 | 145   | 0.21 | 0.13 | 0.012  | 0.079  | NA |
| chr9 | 71394793  | 71395492  | FAM122A         | ENSG00000187866 | 178   | 0.12 | 0.5  | 0.012  | -0.38  | NA |
| chr9 | 115512611 | 115513757 | RP11-276E15.4   | ENSG00000226609 | -448  | 0.25 | 0.16 | 0.012  | 0.091  | NA |
| chr9 | 23820691  | 23822135  | ELAVL2          | ENSG00000107105 | 65    | 0.24 | 0.15 | 0.013  | 0.084  | NA |
| chr9 | 35616980  | 35617324  | CD72            | ENSG00000137101 | 1198  | 0.18 | 0.35 | 0.013  | -0.17  | NA |

|      |           |           |               |                 |       |      |      |       |        |    |
|------|-----------|-----------|---------------|-----------------|-------|------|------|-------|--------|----|
| chr9 | 37485801  | 37486099  | POLR1E        | ENSG00000137054 | 18    | 0.22 | 0.5  | 0.013 | -0.28  | NA |
| chr9 | 97021464  | 97021967  | ZNF169        | ENSG00000175787 | 122   | 0.29 | 0.14 | 0.013 | 0.14   | NA |
| chr9 | 127951391 | 127952263 | PPP6C         | ENSG00000119414 | 235   | 0.15 | 0.25 | 0.013 | -0.096 | NA |
| chr9 | 135819526 | 135820529 | TSC1          | ENSG00000165699 | -45   | 0.3  | 0.17 | 0.013 | 0.14   | NA |
| chr9 | 14346265  | 14348149  | RP11-120J1.1  | ENSG00000225472 | -112  | 0.28 | 0.14 | 0.014 | 0.14   | NA |
| chr9 | 94877272  | 94877782  | SPTLC1        | ENSG00000090054 | 93    | 0.19 | 0.42 | 0.014 | -0.23  | NA |
| chr9 | 132815766 | 132816615 | GPR107        | ENSG00000148358 | 205   | 0.16 | 0.28 | 0.014 | -0.12  | NA |
| chr9 | 1042417   | 1042973   | RP11-147I11.2 | ENSG00000231191 | -175  | 0.23 | 0.45 | 0.015 | -0.22  | NA |
| chr9 | 91002741  | 91004330  | SPIN1         | ENSG00000106723 | 201   | 0.21 | 0.15 | 0.015 | 0.062  | NA |
| chr9 | 96108466  | 96108992  | C9orf129      | ENSG00000204352 | -33   | 0.32 | 0.18 | 0.016 | 0.14   | NA |
| chr9 | 114937020 | 114937824 | SUSD1         | ENSG00000106868 | 43    | 0.23 | 0.14 | 0.016 | 0.095  | NA |
| chr9 | 976162    | 977828    | DMRT3         | ENSG00000064218 | 31    | 0.2  | 0.15 | 0.017 | 0.056  | NA |
| chr9 | 133027737 | 133028563 | RP11-88G17.6  | ENSG00000230938 | -119  | 0.21 | 0.13 | 0.017 | 0.086  | NA |
| chr9 | 97766649  | 97767955  | C9orf3        | ENSG00000148120 | 40    | 0.19 | 0.25 | 0.018 | -0.065 | NA |
| chr9 | 100818729 | 100819368 | NANS          | ENSG00000095380 | 27    | 0.32 | 0.2  | 0.018 | 0.13   | NA |
| chr9 | 137533359 | 137534397 | COL5A1        | ENSG00000130635 | 258   | 0.28 | 0.2  | 0.018 | 0.077  | NA |
| chr9 | 140917284 | 140918052 | CACNA1B       | ENSG00000148408 | -455  | 0.25 | 0.17 | 0.018 | 0.086  | NA |
| chr9 | 91149945  | 91150648  | NXNL2         | ENSG00000130045 | 280   | 0.48 | 0.25 | 0.019 | 0.23   | NA |
| chr9 | 37800565  | 37801563  | EXOSC3        | ENSG00000107371 | -358  | 0.25 | 0.19 | 0.021 | 0.061  | NA |
| chr9 | 68298596  | 68299115  | RP11-452D2.2  | ENSG00000234042 | 56    | 0.83 | 0.88 | 0.021 | -0.055 | NA |
| chr9 | 97810765  | 97811272  | C9orf3        | ENSG00000148120 | -32   | 0.75 | 0.27 | 0.021 | 0.48   | NA |
| chr9 | 98268475  | 98271454  | PTCH1         | ENSG00000185920 | -1083 | 0.25 | 0.19 | 0.021 | 0.058  | NA |
| chr9 | 131549294 | 131549546 | TBC1D13       | ENSG00000107021 | -63   | 0.31 | 0.14 | 0.021 | 0.17   | NA |
| chr9 | 140008309 | 140009473 | DPP7          | ENSG00000176978 | 53    | 0.26 | 0.15 | 0.021 | 0.11   | NA |
| chr9 | 27572966  | 27573385  | C9orf72       | ENSG00000147894 | 271   | 0.34 | 0.21 | 0.022 | 0.13   | NA |
| chr9 | 130692839 | 130693331 | PIP5KL1       | ENSG00000167103 | -21   | 0.24 | 0.14 | 0.022 | 0.1    | NA |
| chr9 | 134406025 | 134407173 | UCK1          | ENSG00000130717 | -33   | 0.2  | 0.28 | 0.022 | -0.076 | NA |
| chr9 | 100684498 | 100685051 | C9orf156      | ENSG00000136932 | -24   | 0.21 | 0.32 | 0.023 | -0.11  | NA |
| chr9 | 115652446 | 115653448 | SLC46A2       | ENSG00000119457 | 143   | 0.29 | 0.21 | 0.024 | 0.086  | NA |
| chr9 | 131643911 | 131644749 | CCBL1         | ENSG00000171097 | -122  | 0.3  | 0.18 | 0.024 | 0.12   | NA |

|      |           |           |             |                 |       |      |      |       |        |    |
|------|-----------|-----------|-------------|-----------------|-------|------|------|-------|--------|----|
| chr9 | 71788715  | 71789542  | TJP2        | ENSG00000119139 | 47    | 0.3  | 0.2  | 0.026 | 0.099  | NA |
| chr9 | 25677494  | 25678684  | TUSC1       | ENSG00000198680 | 767   | 0.17 | 0.23 | 0.027 | -0.064 | NA |
| chr9 | 130477195 | 130478146 | PTRH1       | ENSG00000187024 | 213   | 0.25 | 0.18 | 0.027 | 0.072  | NA |
| chr9 | 116701    | 118177    | FOXD4       | ENSG00000170122 | 978   | 0.38 | 0.14 | 0.028 | 0.24   | NA |
| chr9 | 110045112 | 110046303 | RAD23B      | ENSG00000119318 | 289   | 0.19 | 0.26 | 0.028 | -0.076 | NA |
| chr9 | 137967110 | 137967727 | OLFM1       | ENSG00000130558 | 150   | 0.3  | 0.16 | 0.028 | 0.14   | NA |
| chr9 | 36400251  | 36401327  | RNF38       | ENSG00000137075 | -493  | 0.21 | 0.16 | 0.029 | 0.056  | NA |
| chr9 | 37784749  | 37785345  | EXOSC3      | ENSG00000107371 | 7     | 0.23 | 0.17 | 0.029 | 0.06   | NA |
| chr9 | 79633326  | 79636030  | FOXB2       | ENSG00000204612 | 107   | 0.21 | 0.16 | 0.03  | 0.052  | NA |
| chr9 | 101705907 | 101706682 | COL15A1     | ENSG00000204291 | 373   | 0.26 | 0.17 | 0.03  | 0.085  | NA |
| chr9 | 130661107 | 130662047 | ST6GALNAC6  | ENSG00000160408 | 118   | 0.34 | 0.19 | 0.03  | 0.14   | NA |
| chr9 | 131533779 | 131534695 | ZER1        | ENSG00000160445 | -270  | 0.28 | 0.16 | 0.03  | 0.11   | NA |
| chr9 | 139399040 | 139400388 | NOTCH1      | ENSG00000148400 | -417  | 0.97 | 0.93 | 0.03  | 0.04   | NA |
| chr9 | 123605043 | 123605585 | PSMD5       | ENSG00000095261 | -154  | 0.32 | 0.15 | 0.031 | 0.17   | NA |
| chr9 | 112402767 | 112403349 | PALM2       | ENSG00000243444 | -10   | 0.19 | 0.75 | 0.032 | -0.56  | NA |
| chr9 | 140352818 | 140354044 | NELF        | ENSG00000165802 | 323   | 0.31 | 0.23 | 0.032 | 0.079  | NA |
| chr9 | 104357007 | 104357288 | PPP3R2      | ENSG00000188386 | 95    | 1    | 0.93 | 0.033 | 0.068  | NA |
| chr9 | 107689847 | 107690798 | ABCA1       | ENSG00000165029 | 98    | 0.27 | 0.34 | 0.033 | -0.07  | NA |
| chr9 | 82185479  | 82188560  | TLE4        | ENSG00000106829 | 331   | 0.18 | 0.23 | 0.034 | -0.046 | NA |
| chr9 | 112542131 | 112542667 | PALM2-AKAP2 | ENSG00000157654 | -190  | 0.24 | 0.14 | 0.034 | 0.093  | NA |
| chr9 | 91606335  | 91606823  | S1PR3       | ENSG00000213694 | 217   | 0.33 | 0.21 | 0.036 | 0.12   | NA |
| chr9 | 140484219 | 140485721 | ZMYND19     | ENSG00000165724 | -28   | 0.25 | 0.18 | 0.037 | 0.076  | NA |
| chr9 | 140332887 | 140333140 | ENTPD8      | ENSG00000188833 | -259  | 0.51 | 0.68 | 0.038 | -0.17  | NA |
| chr9 | 140055368 | 140055924 | GRIN1       | ENSG00000176884 | -1512 | 0.27 | 0.51 | 0.039 | -0.24  | NA |
| chr9 | 19379794  | 19380341  | RPS6        | ENSG00000137154 | 129   | 0.22 | 0.12 | 0.04  | 0.1    | NA |
| chr9 | 140349704 | 140349970 | NELF        | ENSG00000165802 | -676  | 0.78 | 0.92 | 0.04  | -0.14  | NA |
| chr9 | 37575918  | 37576445  | FBXO10      | ENSG00000147912 | 69    | 0.24 | 0.18 | 0.041 | 0.066  | NA |
| chr9 | 4984543   | 4985630   | JAK2        | ENSG00000096968 | 53    | 0.26 | 0.2  | 0.042 | 0.056  | NA |
| chr9 | 93922196  | 93922679  | C9orf73     | ENSG00000235641 | 386   | 0.78 | 0.39 | 0.042 | 0.39   | NA |
| chr9 | 99962136  | 99962426  | ZNF322B     | ENSG00000188801 | -371  | 0.6  | 1    | 0.042 | -0.4   | NA |

|      |           |           |               |                 |      |      |      |       |        |    |
|------|-----------|-----------|---------------|-----------------|------|------|------|-------|--------|----|
| chr9 | 26946847  | 26947578  | PLAA          | ENSG00000137055 | -231 | 0.23 | 0.17 | 0.043 | 0.063  | NA |
| chr9 | 99449110  | 99449578  | RP11-535M15.1 | ENSG00000224848 | 6    | 0.32 | 0.58 | 0.043 | -0.25  | NA |
| chr9 | 139439041 | 139441532 | NOTCH1        | ENSG00000148400 | 28   | 0.24 | 0.2  | 0.043 | 0.041  | NA |
| chr9 | 14312952  | 14315351  | NFIB          | ENSG00000147862 | -485 | 0.23 | 0.19 | 0.044 | 0.043  | NA |
| chr9 | 79792070  | 79793328  | VPS13A        | ENSG00000197969 | 430  | 0.23 | 0.17 | 0.044 | 0.056  | NA |
| chr9 | 131790148 | 131790443 | SH3GLB2       | ENSG00000148341 | 169  | 0.23 | 0.15 | 0.045 | 0.08   | NA |
| chr9 | 73027330  | 73029184  | KLF9          | ENSG00000119138 | 1283 | 0.27 | 0.2  | 0.046 | 0.071  | NA |
| chr9 | 97848140  | 97848525  | MIR24-1       | ENSG00000207617 | 29   | 0.86 | 0.5  | 0.046 | 0.36   | NA |
| chr9 | 117266468 | 117268094 | DFNB31        | ENSG00000095397 | -662 | 0.22 | 0.17 | 0.046 | 0.051  | NA |
| chr9 | 36258170  | 36258886  | GNE           | ENSG00000159921 | -202 | 0.25 | 0.16 | 0.047 | 0.089  | NA |
| chr9 | 123555399 | 123555899 | FBXW2         | ENSG00000119402 | -4   | 0.34 | 0.2  | 0.047 | 0.14   | NA |
| chr9 | 130374108 | 130374885 | STXBP1        | ENSG00000136854 | -44  | 0.18 | 0.29 | 0.047 | -0.12  | NA |
| chr9 | 98637245  | 98638445  | C9orf130      | ENSG00000175611 | -493 | 0.17 | 0.26 | 0.048 | -0.088 | NA |
| chr9 | 131580590 | 131581583 | ENDOG         | ENSG00000167136 | 333  | 0.16 | 0.22 | 0.048 | -0.062 | NA |
| chr9 | 33290318  | 33291003  | NFX1          | ENSG00000086102 | 151  | 0.32 | 0.16 | 0.049 | 0.16   | NA |
| chr9 | 4491167   | 4491418   | SLC1A1        | ENSG00000106688 | 848  | 0.15 | 0.29 | 0.05  | -0.14  | NA |
| chr9 | 131798727 | 131799280 | FAM73B        | ENSG00000148343 | 103  | 0.39 | 0.27 | 0.05  | 0.12   | NA |
| chr9 | 3181006   | 3181867   | RP11-32F11.2  | ENSG00000236511 | -153 | 0.21 | 0.14 | 0.051 | 0.066  | NA |
| chr9 | 96792652  | 96793436  | PTPDC1        | ENSG00000158079 | -32  | 0.15 | 0.22 | 0.053 | -0.066 | NA |
| chr9 | 111695774 | 111696956 | IKBKAP        | ENSG00000070061 | -132 | 0.22 | 0.36 | 0.053 | -0.14  | NA |
| chr9 | 17134821  | 17135706  | CNTLN         | ENSG00000044459 | 283  | 0.23 | 0.17 | 0.055 | 0.056  | NA |
| chr9 | 139685250 | 139685978 | TMEM141       | ENSG00000244187 | -193 | 0.27 | 0.18 | 0.055 | 0.088  | NA |
| chr9 | 91925372  | 91926639  | CKS2          | ENSG00000123975 | -108 | 0.2  | 0.14 | 0.057 | 0.056  | NA |
| chr9 | 841374    | 843364    | DMRT1         | ENSG00000137090 | 679  | 0.32 | 0.26 | 0.058 | 0.058  | NA |
| chr9 | 116163208 | 116163848 | ALAD          | ENSG00000148218 | -128 | 0.26 | 0.18 | 0.058 | 0.085  | NA |
| chr9 | 88713705  | 88714908  | GOLM1         | ENSG00000135052 | 167  | 0.27 | 0.18 | 0.059 | 0.092  | NA |
| chr9 | 138606403 | 138606934 | KCNT1         | ENSG00000107147 | 268  | 0.3  | 0.21 | 0.06  | 0.09   | NA |
| chr9 | 138628082 | 138628730 | KCNT1         | ENSG00000107147 | 41   | 0.31 | 0.21 | 0.06  | 0.098  | NA |
| chr9 | 27528976  | 27529885  | MOBK2B        | ENSG00000120162 | 349  | 0.23 | 0.16 | 0.061 | 0.075  | NA |
| chr9 | 101569905 | 101570349 | GALNT12       | ENSG00000119514 | 146  | 0.29 | 0.17 | 0.061 | 0.12   | NA |

|      |           |           |               |                 |       |      |      |       |        |    |
|------|-----------|-----------|---------------|-----------------|-------|------|------|-------|--------|----|
| chr9 | 135545001 | 135546462 | DDX31         | ENSG00000125485 | -328  | 0.26 | 0.21 | 0.066 | 0.047  | NA |
| chr9 | 139301540 | 139301847 | SDCCAG3       | ENSG00000165689 | -56   | 0.88 | 0.97 | 0.066 | -0.081 | NA |
| chr9 | 44118137  | 44120175  | ANKRD20A7P    | ENSG00000236816 | -712  | 0.33 | 0.4  | 0.067 | -0.07  | NA |
| chr9 | 115095149 | 115095919 | ROD1          | ENSG00000119314 | -225  | 0.23 | 0.17 | 0.069 | 0.061  | NA |
| chr9 | 139922197 | 139923447 | ABCA2         | ENSG00000107331 | -199  | 0.24 | 0.19 | 0.07  | 0.051  | NA |
| chr9 | 140079329 | 140079764 | ANAPC2        | ENSG00000176248 | -1313 | 0.82 | 0.88 | 0.074 | -0.059 | NA |
| chr9 | 124921950 | 124922170 | NDUFA8        | ENSG00000119421 | 6     | 0.28 | 0.2  | 0.075 | 0.082  | NA |
| chr9 | 136856230 | 136858681 | VAV2          | ENSG00000160293 | -74   | 0.23 | 0.19 | 0.078 | 0.038  | NA |
| chr9 | 5628570   | 5629743   | KIAA1432      | ENSG00000107036 | 131   | 0.17 | 0.24 | 0.079 | -0.068 | NA |
| chr9 | 66457551  | 66458640  | RP11-262H14.1 | ENSG00000238113 | 195   | 0.21 | 0.24 | 0.08  | -0.027 | NA |
| chr9 | 68377476  | 68377826  | RP11-149F8.9  | ENSG00000230640 | 208   | 0.65 | 0.47 | 0.08  | 0.18   | NA |
| chr9 | 132499968 | 132500553 | AL590369.1    | ENSG00000255824 | 1642  | 0.16 | 0.3  | 0.08  | -0.15  | NA |
| chr9 | 136202804 | 136203247 | SURF6         | ENSG00000148296 | 210   | 0.23 | 0.17 | 0.081 | 0.056  | NA |
| chr9 | 94903572  | 94903827  | C9orf44       | ENSG00000225511 | 119   | 0.2  | 0.45 | 0.082 | -0.25  | NA |
| chr9 | 100954286 | 100954593 | CORO2A        | ENSG00000106789 | 483   | 0.33 | 0.48 | 0.084 | -0.14  | NA |
| chr9 | 130829535 | 130830949 | NAIF1         | ENSG00000171169 | -642  | 0.2  | 0.15 | 0.085 | 0.053  | NA |
| chr9 | 35071756  | 35072885  | VCP           | ENSG00000165280 | -309  | 0.3  | 0.24 | 0.086 | 0.061  | NA |
| chr9 | 69380679  | 69382408  | ANKRD20A4     | ENSG00000172014 | -269  | 0.2  | 0.12 | 0.086 | 0.087  | NA |
| chr9 | 70922045  | 70922723  | RP11-561O23.7 | ENSG00000225337 | 75    | 0.65 | 0.87 | 0.086 | -0.22  | NA |
| chr9 | 138370738 | 138372414 | KIAA0649      | ENSG00000196422 | -72   | 0.21 | 0.17 | 0.087 | 0.046  | NA |
| chr9 | 139943099 | 139943715 | ENTPD2        | ENSG00000054179 | 658   | 0.23 | 0.15 | 0.087 | 0.075  | NA |
| chr9 | 1051819   | 1052240   | DMRT2         | ENSG00000173253 | 415   | 0.18 | 1    | 0.088 | -0.82  | NA |
| chr9 | 79520803  | 79521508  | PRUNE2        | ENSG00000106772 | -154  | 0.23 | 0.15 | 0.089 | 0.083  | NA |
| chr9 | 140099321 | 140100465 | TMEM203       | ENSG00000187713 | 196   | 0.19 | 0.25 | 0.089 | -0.056 | NA |
| chr9 | 6645080   | 6645975   | GLDC          | ENSG00000178445 | 123   | 0.3  | 0.22 | 0.09  | 0.08   | NA |
| chr9 | 26956301  | 26956770  | IFT74         | ENSG00000096872 | 164   | 0.28 | 0.17 | 0.091 | 0.11   | NA |
| chr9 | 132020629 | 132021038 | RP11-344B5.4  | ENSG00000235007 | 200   | 0.25 | 0.18 | 0.094 | 0.069  | NA |
| chr9 | 130922511 | 130923145 | C9orf16       | ENSG00000171159 | 289   | 0.31 | 0.21 | 0.099 | 0.096  | NA |
| chr9 | 1050078   | 1050510   | DMRT2         | ENSG00000173253 | -60   | 0.34 | 0.18 | 0.1   | 0.16   | NA |
| chr9 | 85677015  | 85678321  | RASEF         | ENSG00000165105 | 375   | 0.18 | 0.23 | 0.1   | -0.054 | NA |

|      |           |           |               |                 |      |      |      |      |        |    |
|------|-----------|-----------|---------------|-----------------|------|------|------|------|--------|----|
| chr9 | 89763336  | 89763767  | C9orf170      | ENSG00000204446 | -8   | 0.13 | 0.2  | 0.1  | -0.071 | NA |
| chr9 | 138680881 | 138681159 | KCNT1         | ENSG00000107147 | 185  | 0.81 | 0.91 | 0.1  | -0.095 | NA |
| chr9 | 33447446  | 33447824  | AQP3          | ENSG00000165272 | -128 | 0.26 | 0.14 | 0.11 | 0.12   | NA |
| chr9 | 94123793  | 94124201  | AUH           | ENSG00000148090 | 172  | 0.14 | 0.25 | 0.11 | -0.11  | NA |
| chr9 | 95946147  | 95947835  | WNK2          | ENSG00000165238 | -207 | 0.21 | 0.17 | 0.11 | 0.036  | NA |
| chr9 | 132804279 | 132806003 | FNBP1         | ENSG00000187239 | 300  | 0.23 | 0.18 | 0.11 | 0.046  | NA |
| chr9 | 139939783 | 139941141 | NPDC1         | ENSG00000107281 | 46   | 0.19 | 0.15 | 0.11 | 0.033  | NA |
| chr9 | 2014831   | 2018105   | SMARCA2       | ENSG00000080503 | 1126 | 0.24 | 0.21 | 0.12 | 0.033  | NA |
| chr9 | 37079450  | 37080393  | RP11-220I1.1  | ENSG00000233137 | 28   | 0.25 | 0.17 | 0.12 | 0.085  | NA |
| chr9 | 86594326  | 86596142  | HNRNPK        | ENSG00000165119 | -129 | 0.28 | 0.22 | 0.12 | 0.062  | NA |
| chr9 | 95526459  | 95527825  | BICD2         | ENSG00000185963 | -48  | 0.26 | 0.21 | 0.12 | 0.051  | NA |
| chr9 | 99540025  | 99540472  | ZNF510        | ENSG00000081386 | 80   | 0.28 | 0.17 | 0.12 | 0.11   | NA |
| chr9 | 99983210  | 99984959  | RP11-498P14.2 | ENSG00000159712 | -546 | 0.28 | 0.21 | 0.12 | 0.067  | NA |
| chr9 | 116860979 | 116861591 | KIF12         | ENSG00000136883 | 52   | 0.21 | 0.15 | 0.12 | 0.061  | NA |
| chr9 | 124854824 | 124855819 | TLL1          | ENSG00000175764 | -276 | 0.25 | 0.2  | 0.12 | 0.059  | NA |
| chr9 | 128023933 | 128024596 | GAPVD1        | ENSG00000165219 | 191  | 0.27 | 0.41 | 0.12 | -0.14  | NA |
| chr9 | 130497262 | 130497846 | TOR2A         | ENSG00000160404 | 0    | 0.21 | 0.14 | 0.12 | 0.073  | NA |
| chr9 | 136024223 | 136025112 | RALGDS        | ENSG00000160271 | -79  | 0.28 | 0.2  | 0.12 | 0.081  | NA |
| chr9 | 136918498 | 136918708 | BRD3          | ENSG00000169925 | 659  | 0.78 | 0.87 | 0.12 | -0.085 | NA |
| chr9 | 34989555  | 34989875  | DNAJB5        | ENSG00000137094 | 77   | 0.16 | 0.24 | 0.13 | -0.073 | NA |
| chr9 | 95569429  | 95572255  | ANKRD19P      | ENSG00000187984 | -828 | 0.29 | 0.23 | 0.13 | 0.057  | NA |
| chr9 | 95675545  | 95675773  | ALOX15P2      | ENSG00000188101 | 221  | 0.86 | 0.96 | 0.13 | -0.1   | NA |
| chr9 | 103189776 | 103190020 | C9orf30       | ENSG00000066697 | 179  | 0.19 | 0.26 | 0.13 | -0.072 | NA |
| chr9 | 103791944 | 103792173 | RP11-35N6.1   | ENSG00000148123 | 1067 | 0.33 | 1    | 0.13 | -0.67  | NA |
| chr9 | 113017745 | 113019297 | TXN           | ENSG00000136810 | 225  | 0.18 | 0.24 | 0.13 | -0.059 | NA |
| chr9 | 123475985 | 123477255 | MEGF9         | ENSG00000106780 | -8   | 0.21 | 0.16 | 0.13 | 0.046  | NA |
| chr9 | 15510176  | 15511338  | PSIP1         | ENSG00000164985 | -470 | 0.28 | 0.22 | 0.14 | 0.061  | NA |
| chr9 | 135905412 | 135906550 | GTF3C5        | ENSG00000148308 | -95  | 0.26 | 0.2  | 0.14 | 0.055  | NA |
| chr9 | 139872237 | 139873143 | PTGDS         | ENSG00000107317 | -574 | 0.26 | 0.21 | 0.14 | 0.053  | NA |
| chr9 | 140499458 | 140500891 | ARRDC1        | ENSG00000197070 | 68   | 0.23 | 0.18 | 0.14 | 0.05   | NA |

|      |           |           |              |                 |       |      |      |      |        |    |
|------|-----------|-----------|--------------|-----------------|-------|------|------|------|--------|----|
| chr9 | 95431812  | 95432671  | IPPK         | ENSG00000127080 | 306   | 0.27 | 0.2  | 0.15 | 0.071  | NA |
| chr9 | 101017382 | 101018581 | TBC1D2       | ENSG00000095383 | -119  | 0.18 | 0.26 | 0.15 | -0.083 | NA |
| chr9 | 107526172 | 107526779 | NIPSNAP3B    | ENSG00000165028 | 37    | 0.22 | 0.36 | 0.15 | -0.14  | NA |
| chr9 | 111617320 | 111618144 | ACTL7B       | ENSG00000148156 | 1507  | 0.96 | 0.99 | 0.15 | -0.029 | NA |
| chr9 | 129676764 | 129677415 | RALGPS1      | ENSG00000136828 | 36    | 0.2  | 0.14 | 0.15 | 0.057  | NA |
| chr9 | 130616619 | 130616858 | ENG          | ENSG00000106991 | 177   | 0.84 | 0.72 | 0.15 | 0.12   | NA |
| chr9 | 139400878 | 139401569 | NOTCH1       | ENSG00000148400 | -1926 | 0.96 | 0.91 | 0.15 | 0.045  | NA |
| chr9 | 35646744  | 35647265  | CD72         | ENSG00000137101 | -197  | 0.17 | 0.24 | 0.16 | -0.073 | NA |
| chr9 | 125693676 | 125694113 | ZBTB26       | ENSG00000171448 | -115  | 0.19 | 0.34 | 0.16 | -0.16  | NA |
| chr9 | 130955166 | 130955498 | CIZ1         | ENSG00000148337 | -956  | 0.16 | 0.24 | 0.16 | -0.082 | NA |
| chr9 | 133710260 | 133711285 | ABL1         | ENSG00000097007 | 319   | 0.21 | 0.29 | 0.16 | -0.079 | NA |
| chr9 | 68410746  | 68411413  | RP11-764K9.3 | ENSG00000230253 | 1156  | 0.54 | 0.47 | 0.17 | 0.069  | NA |
| chr9 | 71939501  | 71940679  | FAM189A2     | ENSG00000135063 | 602   | 0.17 | 0.22 | 0.17 | -0.045 | NA |
| chr9 | 98783216  | 98784364  | NCRNA00092   | ENSG00000225194 | 252   | 0.21 | 0.25 | 0.17 | -0.039 | NA |
| chr9 | 99616401  | 99616940  | ZNF782       | ENSG00000196597 | -205  | 0.28 | 0.34 | 0.17 | -0.066 | NA |
| chr9 | 100263675 | 100265217 | TMOD1        | ENSG00000136842 | 525   | 0.24 | 0.2  | 0.17 | 0.038  | NA |
| chr9 | 131266838 | 131267277 | GLE1         | ENSG00000119392 | 78    | 0.16 | 0.22 | 0.17 | -0.059 | NA |
| chr9 | 139606300 | 139607433 | FAM69B       | ENSG00000165716 | -156  | 0.24 | 0.3  | 0.17 | -0.069 | NA |
| chr9 | 72873689  | 72874264  | SMC5         | ENSG00000198887 | 39    | 0.32 | 0.22 | 0.18 | 0.1    | NA |
| chr9 | 94185651  | 94187296  | NFIL3        | ENSG00000165030 | -329  | 0.22 | 0.17 | 0.18 | 0.052  | NA |
| chr9 | 114361410 | 114361760 | PTGR1        | ENSG00000106853 | 102   | 0.21 | 0.31 | 0.18 | -0.098 | NA |
| chr9 | 116638594 | 116638974 | ZNF618       | ENSG00000157657 | 154   | 0.25 | 0.17 | 0.18 | 0.082  | NA |
| chr9 | 137000467 | 137001998 | WDR5         | ENSG00000196363 | 22    | 0.23 | 0.19 | 0.18 | 0.039  | NA |
| chr9 | 34611950  | 34612641  | C9orf23      | ENSG00000164967 | -194  | 0.27 | 0.21 | 0.19 | 0.055  | NA |
| chr9 | 38423947  | 38424584  | IGFBPL1      | ENSG00000137142 | 179   | 0.2  | 0.15 | 0.19 | 0.045  | NA |
| chr9 | 94648653  | 94648964  | ROR2         | ENSG00000169071 | 673   | 0.95 | 0.88 | 0.19 | 0.067  | NA |
| chr9 | 2717903   | 2718953   | KCNV2        | ENSG00000168263 | 926   | 0.98 | 0.99 | 0.2  | -0.013 | NA |
| chr9 | 34628795  | 34629061  | ARID3C       | ENSG00000205143 | -824  | 0.26 | 0.14 | 0.2  | 0.12   | NA |
| chr9 | 36572703  | 36573073  | MELK         | ENSG00000165304 | 29    | 0.18 | 0.09 | 0.2  | 0.092  | NA |
| chr9 | 71319698  | 71320937  | PIP5K1B      | ENSG00000107242 | -258  | 0.24 | 0.3  | 0.2  | -0.053 | NA |

|      |           |           |               |                 |       |      |      |      |        |    |
|------|-----------|-----------|---------------|-----------------|-------|------|------|------|--------|----|
| chr9 | 74061513  | 74062097  | TRPM3         | ENSG00000083067 | -54   | 0.24 | 0.19 | 0.21 | 0.052  | NA |
| chr9 | 96069141  | 96069380  | WNK2          | ENSG00000165238 | 341   | 0.91 | 0.96 | 0.21 | -0.055 | NA |
| chr9 | 118916362 | 118917175 | PAPPA         | ENSG00000182752 | 685   | 0.22 | 0.17 | 0.21 | 0.047  | NA |
| chr9 | 34379541  | 34380017  | C9orf24       | ENSG00000164972 | -6    | 0.83 | 0.92 | 0.22 | -0.092 | NA |
| chr9 | 34664930  | 34665687  | RP11-195F19.9 | ENSG00000230074 | -354  | 0.2  | 0.14 | 0.22 | 0.063  | NA |
| chr9 | 37120050  | 37120985  | ZCCHC7        | ENSG00000147905 | -19   | 0.19 | 0.15 | 0.22 | 0.039  | NA |
| chr9 | 90340715  | 90341542  | CTSL1         | ENSG00000135047 | 104   | 0.21 | 0.16 | 0.22 | 0.051  | NA |
| chr9 | 130271237 | 130271447 | FAM129B       | ENSG00000136830 | 1272  | 0.97 | 0.87 | 0.22 | 0.099  | NA |
| chr9 | 139640640 | 139640885 | LCN6          | ENSG00000204003 | -288  | 0.86 | 1    | 0.22 | -0.14  | NA |
| chr9 | 5832579   | 5833261   | ERMP1         | ENSG00000099219 | -79   | 0.24 | 0.19 | 0.23 | 0.05   | NA |
| chr9 | 22446681  | 22447695  | DMRTA1        | ENSG00000176399 | 348   | 0.2  | 0.25 | 0.23 | -0.045 | NA |
| chr9 | 99637845  | 99638281  | ZNF782        | ENSG00000196597 | -207  | 0.22 | 0.37 | 0.23 | -0.15  | NA |
| chr9 | 115983419 | 115984109 | FKBP15        | ENSG00000119321 | -205  | 0.31 | 0.22 | 0.23 | 0.089  | NA |
| chr9 | 124460967 | 124461361 | DAB2IP        | ENSG00000136848 | -485  | 0.2  | 0.29 | 0.23 | -0.087 | NA |
| chr9 | 132648043 | 132648284 | RP11-409K20.7 | ENSG00000224988 | -1714 | 0.48 | 0.32 | 0.23 | 0.16   | NA |
| chr9 | 139980377 | 139981887 | MAN1B1        | ENSG00000177239 | -247  | 0.23 | 0.18 | 0.23 | 0.054  | NA |
| chr9 | 140512892 | 140513420 | C9orf37       | ENSG00000203993 | 109   | 0.22 | 0.15 | 0.23 | 0.077  | NA |
| chr9 | 35675648  | 35676375  | C9orf100      | ENSG00000137135 | -148  | 0.29 | 0.24 | 0.24 | 0.051  | NA |
| chr9 | 108456700 | 108457485 | TMEM38B       | ENSG00000095209 | 267   | 0.3  | 0.22 | 0.24 | 0.071  | NA |
| chr9 | 132565316 | 132566033 | TOR1B         | ENSG00000136816 | 242   | 0.2  | 0.12 | 0.24 | 0.082  | NA |
| chr9 | 133319864 | 133320810 | ASS1          | ENSG00000130707 | 243   | 0.23 | 0.28 | 0.24 | -0.045 | NA |
| chr9 | 38067683  | 38069628  | RP11-613M10.9 | ENSG00000255872 | 29    | 0.24 | 0.21 | 0.25 | 0.031  | NA |
| chr9 | 89563490  | 89563698  | RP11-276H19.1 | ENSG00000226237 | -20   | 0.23 | 0.13 | 0.25 | 0.096  | NA |
| chr9 | 91933284  | 91933907  | SECISBP2      | ENSG00000187742 | 174   | 0.22 | 0.15 | 0.25 | 0.075  | NA |
| chr9 | 114393346 | 114394205 | C9orf29       | ENSG00000204173 | -206  | 0.27 | 0.21 | 0.25 | 0.061  | NA |
| chr9 | 131218100 | 131219409 | ODF2          | ENSG00000136811 | 418   | 0.25 | 0.22 | 0.25 | 0.03   | NA |
| chr9 | 134151853 | 134153015 | FAM78A        | ENSG00000126882 | -500  | 0.23 | 0.19 | 0.25 | 0.038  | NA |
| chr9 | 1045541   | 1046394   | AL358976.1    | ENSG00000247223 | -112  | 0.21 | 0.24 | 0.26 | -0.038 | NA |
| chr9 | 5185333   | 5185780   | INSL6         | ENSG00000120210 | 112   | 0.9  | 0.96 | 0.26 | -0.057 | NA |
| chr9 | 19788215  | 19789288  | SLC24A2       | ENSG00000155886 | -1825 | 0.31 | 0.23 | 0.26 | 0.071  | NA |



|      |           |           |               |                 |       |      |      |      |        |    |
|------|-----------|-----------|---------------|-----------------|-------|------|------|------|--------|----|
| chr9 | 77702885  | 77703819  | C9orf95       | ENSG00000106733 | -301  | 0.22 | 0.19 | 0.26 | 0.034  | NA |
| chr9 | 123342126 | 123342513 | CDK5RAP2      | ENSG00000136861 | -36   | 0.2  | 0.31 | 0.26 | -0.11  | NA |
| chr9 | 125703098 | 125703597 | RABGAP1       | ENSG00000011454 | 235   | 0.23 | 0.14 | 0.26 | 0.091  | NA |
| chr9 | 136324676 | 136325527 | C9orf7        | ENSG00000160325 | 12    | 0.17 | 0.12 | 0.26 | 0.05   | NA |
| chr9 | 139304467 | 139305795 | SDCCAG3       | ENSG00000165689 | -411  | 0.19 | 0.24 | 0.26 | -0.042 | NA |
| chr9 | 96338040  | 96339836  | PHF2          | ENSG00000197724 | 249   | 0.32 | 0.27 | 0.27 | 0.042  | NA |
| chr9 | 101983719 | 101984961 | ALG2          | ENSG00000119523 | -116  | 0.2  | 0.26 | 0.27 | -0.061 | NA |
| chr9 | 117160139 | 117161064 | RP11-9M16.2   | ENSG00000235119 | 182   | 0.23 | 0.28 | 0.27 | -0.046 | NA |
| chr9 | 123638820 | 123639936 | PHF19         | ENSG00000119403 | -74   | 0.26 | 0.22 | 0.27 | 0.04   | NA |
| chr9 | 130186276 | 130187160 | ZNF79         | ENSG00000196152 | 57    | 0.2  | 0.26 | 0.27 | -0.052 | NA |
| chr9 | 132403872 | 132404743 | ASB6          | ENSG00000148331 | 96    | 0.17 | 0.21 | 0.27 | -0.035 | NA |
| chr9 | 138709776 | 138711099 | CAMSAP1       | ENSG00000130559 | -420  | 0.96 | 0.97 | 0.27 | -0.016 | NA |
| chr9 | 3526015   | 3526945   | RP11-509J21.1 | ENSG00000232104 | -243  | 0.26 | 0.32 | 0.28 | -0.059 | NA |
| chr9 | 6715976   | 6716503   | RP11-390F4.3  | ENSG00000225489 | -309  | 0.37 | 0.47 | 0.28 | -0.1   | NA |
| chr9 | 26892288  | 26892936  | C9orf82       | ENSG00000120159 | -247  | 0.19 | 0.15 | 0.28 | 0.044  | NA |
| chr9 | 130889698 | 130891144 | PTGES2        | ENSG00000148334 | -467  | 0.2  | 0.16 | 0.28 | 0.035  | NA |
| chr9 | 135285310 | 135285897 | C9orf171      | ENSG00000188523 | 173   | 0.31 | 0.25 | 0.28 | 0.056  | NA |
| chr9 | 136199331 | 136199570 | SURF6         | ENSG00000148296 | 325   | 0.96 | 0.99 | 0.28 | -0.027 | NA |
| chr9 | 139313354 | 139313588 | PMPCA         | ENSG00000165688 | 1825  | 0.9  | 1    | 0.28 | -0.098 | NA |
| chr9 | 35096152  | 35096673  | PIGO          | ENSG00000165282 | -195  | 0.18 | 0.22 | 0.29 | -0.043 | NA |
| chr9 | 114245044 | 114246784 | KIAA0368      | ENSG00000136813 | 723   | 0.23 | 0.2  | 0.29 | 0.03   | NA |
| chr9 | 138852639 | 138853439 | UBAC1         | ENSG00000130560 | 19    | 0.22 | 0.26 | 0.29 | -0.046 | NA |
| chr9 | 21335125  | 21335560  | KLHL9         | ENSG00000198642 | -102  | 0.2  | 0.15 | 0.3  | 0.052  | NA |
| chr9 | 21965096  | 21965747  | C9orf53       | ENSG00000224854 | -1716 | 0.18 | 0.22 | 0.3  | -0.046 | NA |
| chr9 | 86322017  | 86323215  | RP11-522I20.3 | ENSG00000254473 | 107   | 0.18 | 0.22 | 0.3  | -0.045 | NA |
| chr9 | 88896741  | 88897721  | ISCA1         | ENSG00000135070 | -208  | 0.2  | 0.23 | 0.3  | -0.034 | NA |
| chr9 | 113799913 | 113801375 | LPAR1         | ENSG00000198121 | -321  | 0.23 | 0.2  | 0.3  | 0.033  | NA |
| chr9 | 139911509 | 139912786 | ABCA2         | ENSG00000107331 | 516   | 0.97 | 0.95 | 0.3  | 0.019  | NA |
| chr9 | 35689610  | 35691101  | TPM2          | ENSG00000198467 | -458  | 0.5  | 0.47 | 0.31 | 0.034  | NA |
| chr9 | 74979145  | 74980744  | ZFAND5        | ENSG00000107372 | -682  | 0.28 | 0.24 | 0.31 | 0.036  | NA |

|      |           |           |               |                 |       |      |      |      |        |    |
|------|-----------|-----------|---------------|-----------------|-------|------|------|------|--------|----|
| chr9 | 97401286  | 97402067  | FBP1          | ENSG00000165140 | 113   | 0.48 | 0.32 | 0.31 | 0.15   | NA |
| chr9 | 98054676  | 98054916  | RP11-173G21.1 | ENSG00000230221 | -290  | 0.98 | 0.93 | 0.31 | 0.056  | NA |
| chr9 | 99145524  | 99145849  | SLC35D2       | ENSG00000130958 | 276   | 0.35 | 0.22 | 0.31 | 0.12   | NA |
| chr9 | 116172303 | 116173090 | C9orf43       | ENSG00000157653 | 362   | 0.21 | 0.27 | 0.31 | -0.056 | NA |
| chr9 | 127539239 | 127540081 | OLFML2A       | ENSG00000185585 | 223   | 0.31 | 0.24 | 0.31 | 0.067  | NA |
| chr9 | 139622242 | 139623428 | SNHG7         | ENSG00000233016 | -199  | 0.2  | 0.17 | 0.31 | 0.03   | NA |
| chr9 | 140347840 | 140348320 | NELF          | ENSG00000165802 | -457  | 0.9  | 0.95 | 0.31 | -0.046 | NA |
| chr9 | 140473002 | 140473681 | WDR85         | ENSG00000148399 | -172  | 0.26 | 0.33 | 0.31 | -0.068 | NA |
| chr9 | 38619908  | 38622631  | FAM201A       | ENSG00000204860 | 798   | 0.2  | 0.18 | 0.32 | 0.021  | NA |
| chr9 | 70490059  | 70490348  | CBWD5         | ENSG00000147996 | -98   | 0.07 | 0.11 | 0.32 | -0.04  | NA |
| chr9 | 122131086 | 122132214 | DBC1          | ENSG00000078725 | 53    | 0.21 | 0.24 | 0.32 | -0.038 | NA |
| chr9 | 132372343 | 132372965 | METTL11A      | ENSG00000148335 | 1491  | 0.22 | 0.31 | 0.32 | -0.092 | NA |
| chr9 | 136223347 | 136223966 | SURF1         | ENSG00000148290 | -295  | 0.05 | 0.16 | 0.32 | -0.11  | NA |
| chr9 | 13323112  | 13323350  | RP11-272P10.3 | ENSG00000223672 | 423   | 0.46 | 0.37 | 0.33 | 0.089  | NA |
| chr9 | 116102409 | 116102717 | WDR31         | ENSG00000148225 | -29   | 0.34 | 0.27 | 0.33 | 0.07   | NA |
| chr9 | 128508321 | 128510670 | PBX3          | ENSG00000167081 | 944   | 0.2  | 0.18 | 0.33 | 0.024  | NA |
| chr9 | 139559804 | 139561005 | EGFL7         | ENSG00000172889 | 164   | 0.29 | 0.32 | 0.33 | -0.032 | NA |
| chr9 | 38478281  | 38478534  | RP11-403F21.3 | ENSG00000215165 | -61   | 0.96 | 0.91 | 0.34 | 0.044  | NA |
| chr9 | 95055762  | 95056299  | IARS          | ENSG00000196305 | -107  | 0.17 | 0.12 | 0.34 | 0.052  | NA |
| chr9 | 99179479  | 99181723  | ZNF367        | ENSG00000165244 | 10    | 0.23 | 0.21 | 0.34 | 0.022  | NA |
| chr9 | 135229934 | 135230783 | SETX          | ENSG00000107290 | 14    | 0.25 | 0.22 | 0.34 | 0.036  | NA |
| chr9 | 139804004 | 139804337 | TRAF2         | ENSG00000127191 | 1582  | 0.84 | 1    | 0.34 | -0.16  | NA |
| chr9 | 35828737  | 35829423  | C9orf128      | ENSG00000204930 | -336  | 0.17 | 0.21 | 0.35 | -0.042 | NA |
| chr9 | 100613938 | 100614622 | FOXE1         | ENSG00000178919 | -1256 | 0.35 | 0.31 | 0.35 | 0.039  | NA |
| chr9 | 104160853 | 104161528 | MRPL50        | ENSG00000136897 | -304  | 0.28 | 0.5  | 0.35 | -0.22  | NA |
| chr9 | 6006964   | 6008676   | KIAA2026      | ENSG00000183354 | -33   | 0.24 | 0.27 | 0.36 | -0.029 | NA |
| chr9 | 33025082  | 33025797  | APTX          | ENSG00000137074 | -331  | 0.18 | 0.22 | 0.36 | -0.037 | NA |
| chr9 | 43684674  | 43685278  | CNTNAP3B      | ENSG00000154529 | 74    | 0.14 | 0.3  | 0.36 | -0.16  | NA |
| chr9 | 103114595 | 103115414 | TEX10         | ENSG00000136891 | -151  | 0.2  | 0.18 | 0.36 | 0.024  | NA |
| chr9 | 115818836 | 115819343 | ZFP37         | ENSG00000136866 | -93   | 0.25 | 0.21 | 0.36 | 0.044  | NA |

|      |           |           |               |                 |      |      |      |      |        |    |
|------|-----------|-----------|---------------|-----------------|------|------|------|------|--------|----|
| chr9 | 33263781  | 33265118  | BAG1          | ENSG00000107262 | 108  | 0.26 | 0.22 | 0.38 | 0.031  | NA |
| chr9 | 95087949  | 95088606  | CENPP         | ENSG00000188312 | 55   | 0.17 | 0.13 | 0.38 | 0.041  | NA |
| chr9 | 133884359 | 133885010 | LAMC3         | ENSG00000050555 | 215  | 0.26 | 0.18 | 0.38 | 0.075  | NA |
| chr9 | 138391394 | 138393271 | C9orf116      | ENSG00000160345 | -614 | 0.23 | 0.21 | 0.38 | 0.022  | NA |
| chr9 | 139780406 | 139781527 | TRAF2         | ENSG00000127191 | 449  | 0.16 | 0.19 | 0.38 | -0.027 | NA |
| chr9 | 140708852 | 140709066 | EHMT1         | ENSG00000181090 | -829 | 0.93 | 0.98 | 0.38 | -0.044 | NA |
| chr9 | 33166700  | 33167934  | RP11-326F20.5 | ENSG00000233554 | 344  | 0.21 | 0.25 | 0.39 | -0.035 | NA |
| chr9 | 132250466 | 132251123 | RP11-492E3.1  | ENSG00000204054 | -30  | 0.23 | 0.19 | 0.39 | 0.041  | NA |
| chr9 | 140727486 | 140727862 | EHMT1         | ENSG00000181090 | 590  | 1    | 0.92 | 0.39 | 0.083  | NA |
| chr9 | 89626509  | 89626742  | CDC20P1       | ENSG00000231007 | 58   | 0.99 | 0.96 | 0.4  | 0.033  | NA |
| chr9 | 95599702  | 95600005  | EEF1DP2       | ENSG00000226721 | 130  | 0.98 | 0.99 | 0.4  | -0.018 | NA |
| chr9 | 112296438 | 112296747 | RP11-397F23.3 | ENSG00000213539 | -61  | 0.98 | 0.94 | 0.4  | 0.034  | NA |
| chr9 | 112916    | 114839    | RP11-143M1.4  | ENSG00000231808 | -123 | 0.24 | 0.26 | 0.41 | -0.021 | NA |
| chr9 | 32526144  | 32526424  | DDX58         | ENSG00000107201 | -91  | 0.19 | 0.14 | 0.41 | 0.041  | NA |
| chr9 | 34329006  | 34329499  | KIF24         | ENSG00000186638 | -54  | 0.3  | 0.19 | 0.41 | 0.11   | NA |
| chr9 | 40633298  | 40633795  | RP11-292B8.1  | ENSG00000215142 | 153  | 0.21 | 0.32 | 0.41 | -0.11  | NA |
| chr9 | 88356140  | 88357365  | AGTPBP1       | ENSG00000135049 | -19  | 0.22 | 0.19 | 0.41 | 0.033  | NA |
| chr9 | 100459096 | 100459775 | XPA           | ENSG00000136936 | 140  | 0.19 | 0.22 | 0.41 | -0.032 | NA |
| chr9 | 101866994 | 101868297 | TGFBR1        | ENSG00000106799 | 274  | 0.2  | 0.18 | 0.41 | 0.022  | NA |
| chr9 | 115248728 | 115249744 | C9orf147      | ENSG00000230185 | -451 | 0.23 | 0.27 | 0.41 | -0.039 | NA |
| chr9 | 131084541 | 131085471 | TRUB2         | ENSG00000167112 | -314 | 0.24 | 0.28 | 0.41 | -0.043 | NA |
| chr9 | 136214430 | 136215760 | MED22         | ENSG00000148297 | -537 | 0.25 | 0.21 | 0.41 | 0.038  | NA |
| chr9 | 139901954 | 139902205 | ABCA2         | ENSG00000107331 | 1161 | 0.66 | 0.59 | 0.41 | 0.076  | NA |
| chr9 | 132382432 | 132383004 | C9orf50       | ENSG00000179058 | 337  | 0.27 | 0.21 | 0.42 | 0.055  | NA |
| chr9 | 34589113  | 34591978  | CNTFR         | ENSG00000122756 | -841 | 0.32 | 0.3  | 0.42 | 0.02   | NA |
| chr9 | 35732124  | 35732757  | CREB3         | ENSG00000107175 | 108  | 0.29 | 0.24 | 0.42 | 0.047  | NA |
| chr9 | 100069890 | 100070351 | C9orf174      | ENSG00000197816 | 179  | 0.43 | 0.39 | 0.42 | 0.045  | NA |
| chr9 | 127631143 | 127632264 | ARPC5L        | ENSG00000136950 | 219  | 0.18 | 0.14 | 0.42 | 0.038  | NA |
| chr9 | 133971670 | 133972578 | AIF1L         | ENSG00000126878 | 261  | 0.24 | 0.2  | 0.42 | 0.048  | NA |
| chr9 | 34126266  | 34126959  | DCAF12        | ENSG00000198876 | 159  | 0.23 | 0.2  | 0.43 | 0.036  | NA |

|      |           |           |               |                 |       |      |      |      |        |    |
|------|-----------|-----------|---------------|-----------------|-------|------|------|------|--------|----|
| chr9 | 99416904  | 99417592  | C9orf21       | ENSG00000158122 | -218  | 0.22 | 0.18 | 0.43 | 0.042  | NA |
| chr9 | 36487107  | 36488083  | RNF38         | ENSG00000137075 | -50   | 0.21 | 0.17 | 0.44 | 0.037  | NA |
| chr9 | 98079189  | 98080213  | FANCC         | ENSG00000158169 | -194  | 0.18 | 0.15 | 0.44 | 0.024  | NA |
| chr9 | 139964155 | 139965284 | C9orf140      | ENSG00000186193 | 321   | 0.2  | 0.23 | 0.44 | -0.029 | NA |
| chr9 | 15422521  | 15423200  | SNAPC3        | ENSG00000164975 | 158   | 0.15 | 0.19 | 0.45 | -0.037 | NA |
| chr9 | 97488818  | 97489172  | C9orf3        | ENSG00000148120 | 12    | 0.23 | 0.27 | 0.45 | -0.045 | NA |
| chr9 | 112810858 | 112811128 | AKAP2         | ENSG00000241978 | 115   | 0.57 | 0.42 | 0.45 | 0.15   | NA |
| chr9 | 114287380 | 114287695 | ZNF483        | ENSG00000173258 | 98    | 1    | 0.19 | 0.45 | 0.81   | NA |
| chr9 | 135946586 | 135947050 | RP11-326L24.4 | ENSG00000228947 | 429   | 0.94 | 0.89 | 0.45 | 0.047  | NA |
| chr9 | 139551254 | 139551559 | EGFL7         | ENSG00000172889 | -1902 | 0.44 | 1    | 0.45 | -0.56  | NA |
| chr9 | 140445653 | 140446891 | MRPL41        | ENSG00000182154 | 621   | 0.23 | 0.21 | 0.45 | 0.022  | NA |
| chr9 | 21974578  | 21975306  | CDKN2A        | ENSG00000147889 | -116  | 0.16 | 0.2  | 0.46 | -0.048 | NA |
| chr9 | 34377401  | 34377610  | KIAA1161      | ENSG00000164976 | -654  | 0.22 | 0.27 | 0.46 | -0.051 | NA |
| chr9 | 36136188  | 36137229  | GLIPR2        | ENSG00000122694 | -22   | 0.27 | 0.24 | 0.46 | 0.029  | NA |
| chr9 | 87283178  | 87285704  | NTRK2         | ENSG00000148053 | 975   | 0.24 | 0.21 | 0.46 | 0.025  | NA |
| chr9 | 99800856  | 99801724  | CTSL2         | ENSG00000136943 | 134   | 0.22 | 0.26 | 0.46 | -0.04  | NA |
| chr9 | 111881482 | 111882278 | C9orf5        | ENSG00000106771 | 345   | 0.17 | 0.13 | 0.46 | 0.038  | NA |
| chr9 | 130996210 | 130996443 | DNM1          | ENSG00000106976 | 483   | 0.9  | 0.96 | 0.46 | -0.059 | NA |
| chr9 | 131037591 | 131038695 | C9orf119      | ENSG00000175854 | 485   | 0.25 | 0.28 | 0.46 | -0.034 | NA |
| chr9 | 139586824 | 139587048 | AL590226.1    | ENSG00000221693 | -1652 | 1    | 0.97 | 0.46 | 0.029  | NA |
| chr9 | 35657752  | 35658777  | RMRP          | ENSG00000199916 | -250  | 0.19 | 0.24 | 0.47 | -0.042 | NA |
| chr9 | 68726056  | 68726939  | RP11-391M20.1 | ENSG00000229789 | -132  | 0.42 | 0.45 | 0.47 | -0.03  | NA |
| chr9 | 111929197 | 111929587 | C9orf4        | ENSG00000136805 | 179   | 0.19 | 0.22 | 0.47 | -0.035 | NA |
| chr9 | 131450972 | 131452682 | SET           | ENSG00000119335 | 322   | 0.27 | 0.29 | 0.47 | -0.026 | NA |
| chr9 | 139760652 | 139761206 | EDF1          | ENSG00000107223 | -211  | 0.22 | 0.27 | 0.47 | -0.05  | NA |
| chr9 | 140115986 | 140118466 | RNF208        | ENSG00000212864 | -1193 | 0.24 | 0.22 | 0.47 | 0.02   | NA |
| chr9 | 20684026  | 20684636  | RP11-4E23.2   | ENSG00000227071 | 356   | 0.17 | 0.21 | 0.48 | -0.038 | NA |
| chr9 | 35748653  | 35749512  | GBA2          | ENSG00000070610 | -112  | 0.23 | 0.2  | 0.48 | 0.035  | NA |
| chr9 | 88969007  | 88969904  | ZCCHC6        | ENSG00000083223 | -130  | 0.23 | 0.2  | 0.48 | 0.026  | NA |
| chr9 | 108006467 | 108007921 | SLC44A1       | ENSG00000070214 | 291   | 0.19 | 0.17 | 0.48 | 0.024  | NA |

|      |           |           |               |                 |      |      |      |      |        |    |
|------|-----------|-----------|---------------|-----------------|------|------|------|------|--------|----|
| chr9 | 131133566 | 131133958 | URM1          | ENSG00000167118 | 164  | 0.31 | 0.12 | 0.48 | 0.19   | NA |
| chr9 | 33816798  | 33818300  | UBE2R2        | ENSG00000107341 | -16  | 0.3  | 0.34 | 0.49 | -0.043 | NA |
| chr9 | 69065081  | 69065964  | RP11-87H9.2   | ENSG00000233961 | -133 | 0.42 | 0.33 | 0.49 | 0.097  | NA |
| chr9 | 80850833  | 80851434  | CEP78         | ENSG00000148019 | 155  | 0.17 | 0.14 | 0.49 | 0.024  | NA |
| chr9 | 34457375  | 34458892  | DNAI1         | ENSG00000122735 | 721  | 0.18 | 0.2  | 0.5  | -0.019 | NA |
| chr9 | 37903630  | 37904475  | MCART1        | ENSG00000122696 | 55   | 0.14 | 0.11 | 0.5  | 0.025  | NA |
| chr9 | 68454902  | 68455796  | RP11-764K9.4  | ENSG00000215548 | 26   | 0.48 | 0.5  | 0.5  | -0.028 | NA |
| chr9 | 74764241  | 74764903  | GDA           | ENSG00000119125 | 279  | 0.21 | 0.18 | 0.5  | 0.025  | NA |
| chr9 | 123690771 | 123691675 | TRAF1         | ENSG00000056558 | -176 | 0.2  | 0.18 | 0.5  | 0.028  | NA |
| chr9 | 35489704  | 35490700  | RUSC2         | ENSG00000198853 | 78   | 0.18 | 0.16 | 0.51 | 0.026  | NA |
| chr9 | 104499849 | 104501076 | GRIN3A        | ENSG00000198785 | 400  | 0.23 | 0.2  | 0.51 | 0.029  | NA |
| chr9 | 112083333 | 112083549 | EPB41L4B      | ENSG00000095203 | -197 | 0.28 | 0.34 | 0.51 | -0.054 | NA |
| chr9 | 32550559  | 32552532  | C9orf133      | ENSG00000235453 | 403  | 0.17 | 0.2  | 0.52 | -0.026 | NA |
| chr9 | 101558329 | 101559214 | ANKS6         | ENSG00000165138 | 23   | 0.24 | 0.22 | 0.52 | 0.022  | NA |
| chr9 | 22008657  | 22009471  | CDKN2B        | ENSG00000147883 | -112 | 0.19 | 0.22 | 0.53 | -0.026 | NA |
| chr9 | 33076492  | 33076775  | SMU1          | ENSG00000122692 | 24   | 0.18 | 0.22 | 0.53 | -0.04  | NA |
| chr9 | 71628407  | 71628907  | PRKACG        | ENSG00000165059 | 382  | 1    | 0.99 | 0.53 | 0.011  | NA |
| chr9 | 103235171 | 103236627 | TMEFF1        | ENSG00000241697 | 504  | 0.19 | 0.18 | 0.53 | 0.016  | NA |
| chr9 | 5450409   | 5450629   | CD274         | ENSG00000120217 | 16   | 0.22 | 0.36 | 0.54 | -0.14  | NA |
| chr9 | 35161874  | 35162409  | UNC13B        | ENSG00000198722 | 142  | 0.17 | 0.2  | 0.54 | -0.033 | NA |
| chr9 | 130639738 | 130640143 | AK1           | ENSG00000106992 | 10   | 0.26 | 0.22 | 0.54 | 0.04   | NA |
| chr9 | 140033235 | 140034176 | GRIN1         | ENSG00000176884 | 78   | 0.29 | 0.23 | 0.54 | 0.055  | NA |
| chr9 | 10612635  | 10613333  | PTPRD         | ENSG00000153707 | -261 | 0.19 | 0.22 | 0.55 | -0.027 | NA |
| chr9 | 38069784  | 38069991  | RP11-613M10.9 | ENSG00000255872 | -677 | 0.31 | 0.38 | 0.55 | -0.071 | NA |
| chr9 | 44866684  | 44866915  | RP11-160N1.10 | ENSG00000204814 | -772 | 0.89 | 0.96 | 0.55 | -0.076 | NA |
| chr9 | 70971549  | 70972604  | PGM5          | ENSG00000154330 | 261  | 0.23 | 0.28 | 0.56 | -0.055 | NA |
| chr9 | 86535742  | 86536646  | KIF27         | ENSG00000165115 | 148  | 0.18 | 0.15 | 0.56 | 0.027  | NA |
| chr9 | 129088646 | 129088994 | FAM125B       | ENSG00000196814 | -308 | 0.29 | 0.22 | 0.56 | 0.07   | NA |
| chr9 | 130486339 | 130486653 | RP11-56D16.8  | ENSG00000242194 | 615  | 0.8  | 0.73 | 0.56 | 0.065  | NA |
| chr9 | 131314228 | 131315496 | RP11-216B9.6  | ENSG00000228395 | -173 | 0.21 | 0.23 | 0.56 | -0.019 | NA |

|      |           |           |                 |                 |       |      |      |      |        |    |
|------|-----------|-----------|-----------------|-----------------|-------|------|------|------|--------|----|
| chr9 | 28849     | 29588     | XXyac-YRM2039.2 | ENSG00000181404 | 41    | 0.2  | 0.15 | 0.57 | 0.045  | NA |
| chr9 | 19027850  | 19028064  | RP11-296P7.4    | ENSG00000236680 | 1067  | 0.95 | 1    | 0.57 | -0.05  | NA |
| chr9 | 19049981  | 19049949  | RRAGA           | ENSG00000155876 | 143   | 0.22 | 0.25 | 0.57 | -0.025 | NA |
| chr9 | 35814649  | 35815119  | HINT2           | ENSG00000137133 | 105   | 0.21 | 0.19 | 0.57 | 0.025  | NA |
| chr9 | 140728478 | 140729896 | EHMT1           | ENSG00000181090 | 656   | 1    | 0.99 | 0.57 | 0.0096 | NA |
| chr9 | 92218833  | 92219259  | GADD45G         | ENSG00000130222 | -882  | 0.17 | 0.2  | 0.58 | -0.033 | NA |
| chr9 | 115913081 | 115913807 | SLC31A2         | ENSG00000136867 | 222   | 0.18 | 0.21 | 0.58 | -0.03  | NA |
| chr9 | 103790612 | 103791764 | RP11-35N6.1     | ENSG00000148123 | 197   | 0.27 | 0.3  | 0.59 | -0.03  | NA |
| chr9 | 132481472 | 132481745 | RP11-483H20.6   | ENSG00000236024 | -694  | 0.79 | 0.81 | 0.59 | -0.022 | NA |
| chr9 | 99328810  | 99329764  | CDC14B          | ENSG00000081377 | -175  | 0.22 | 0.19 | 0.6  | 0.024  | NA |
| chr9 | 129567144 | 129567803 | ZBTB43          | ENSG00000169155 | 188   | 0.19 | 0.17 | 0.6  | 0.021  | NA |
| chr9 | 136890463 | 136891448 | NCRNA00094      | ENSG00000235106 | 394   | 0.28 | 0.25 | 0.6  | 0.034  | NA |
| chr9 | 139009862 | 139011272 | C9orf69         | ENSG00000238227 | -447  | 0.2  | 0.21 | 0.6  | -0.015 | NA |
| chr9 | 140195501 | 140197475 | NRARP           | ENSG00000198435 | 215   | 0.21 | 0.22 | 0.6  | -0.013 | NA |
| chr9 | 126129330 | 126129602 | CRB2            | ENSG00000148204 | -1592 | 0.87 | 0.89 | 0.61 | -0.027 | NA |
| chr9 | 135753347 | 135754384 | C9orf9          | ENSG00000165698 | 451   | 0.21 | 0.23 | 0.61 | -0.015 | NA |
| chr9 | 139905818 | 139906459 | ABCA2           | ENSG00000107331 | -670  | 0.95 | 0.94 | 0.61 | 0.016  | NA |
| chr9 | 77642704  | 77643595  | C9orf41         | ENSG00000156017 | 40    | 0.19 | 0.22 | 0.62 | -0.025 | NA |
| chr9 | 132099123 | 132099616 | RP11-65J3.1     | ENSG00000233901 | 211   | 0.21 | 0.26 | 0.62 | -0.049 | NA |
| chr9 | 132630324 | 132630823 | USP20           | ENSG00000136878 | -28   | 0.93 | 0.95 | 0.62 | -0.022 | NA |
| chr9 | 136444127 | 136444604 | FAM163B         | ENSG00000196990 | 1003  | 0.9  | 0.87 | 0.62 | 0.034  | NA |
| chr9 | 139345637 | 139345866 | SEC16A          | ENSG00000148396 | -481  | 0.88 | 0.91 | 0.62 | -0.031 | NA |
| chr9 | 139693983 | 139695096 | KIAA1984        | ENSG00000213213 | -228  | 0.22 | 0.19 | 0.62 | 0.034  | NA |
| chr9 | 140114800 | 140115390 | RNF208          | ENSG00000212864 | 680   | 0.86 | 0.9  | 0.62 | -0.036 | NA |
| chr9 | 70176487  | 70177962  | FOXD4L5         | ENSG00000204779 | 1591  | 0.32 | 0.26 | 0.63 | 0.059  | NA |
| chr9 | 127703131 | 127703629 | GOLGA1          | ENSG00000136935 | -2    | 0.24 | 0.21 | 0.63 | 0.032  | NA |
| chr9 | 99883497  | 99883763  | RP11-520B13.7   | ENSG00000213612 | -311  | 0.99 | 0.96 | 0.64 | 0.028  | NA |
| chr9 | 35791584  | 35791924  | NPR2            | ENSG00000159899 | -397  | 0.2  | 0.18 | 0.65 | 0.026  | NA |
| chr9 | 131464843 | 131465830 | PKN3            | ENSG00000160447 | 534   | 0.19 | 0.2  | 0.66 | -0.013 | NA |
| chr9 | 124132057 | 124133095 | STOM            | ENSG00000148175 | -93   | 0.4  | 0.42 | 0.66 | -0.025 | NA |

|      |           |           |              |                 |      |      |      |      |        |    |
|------|-----------|-----------|--------------|-----------------|------|------|------|------|--------|----|
| chr9 | 139904435 | 139904811 | ABCA2        | ENSG00000107331 | 213  | 0.93 | 0.91 | 0.66 | 0.02   | NA |
| chr9 | 71736074  | 71737367  | RP11-265B8.4 | ENSG00000227410 | 511  | 0.27 | 0.24 | 0.67 | 0.035  | NA |
| chr9 | 114658618 | 114659773 | UGCG         | ENSG00000148154 | 149  | 0.2  | 0.18 | 0.67 | 0.016  | NA |
| chr9 | 130007229 | 130007688 | GARNL3       | ENSG00000136895 | -158 | 0.2  | 0.18 | 0.67 | 0.027  | NA |
| chr9 | 6757336   | 6758872   | KDM4C        | ENSG00000107077 | 463  | 0.2  | 0.19 | 0.68 | 0.011  | NA |
| chr9 | 32572996  | 32573227  | NDUFB6       | ENSG00000165264 | 46   | 0.12 | 0.16 | 0.68 | -0.037 | NA |
| chr9 | 35111267  | 35111504  | KIAA1539     | ENSG00000005238 | 35   | 0.33 | 0.28 | 0.68 | 0.051  | NA |
| chr9 | 37650696  | 37651409  | FRMPD1       | ENSG00000070601 | 55   | 0.26 | 0.22 | 0.68 | 0.038  | NA |
| chr9 | 139552947 | 139553269 | EGFL7        | ENSG00000172889 | -200 | 0.86 | 0.89 | 0.68 | -0.031 | NA |
| chr9 | 14693030  | 14693576  | ZDHHC21      | ENSG00000175893 | -40  | 0.17 | 0.21 | 0.69 | -0.033 | NA |
| chr9 | 111775041 | 111775934 | CTNNAL1      | ENSG00000119326 | 292  | 0.17 | 0.15 | 0.69 | 0.016  | NA |
| chr9 | 77502093  | 77502518  | TRPM6        | ENSG00000119121 | -42  | 0.18 | 0.15 | 0.7  | 0.028  | NA |
| chr9 | 79008637  | 79009762  | RFK          | ENSG00000135002 | -517 | 0.2  | 0.22 | 0.7  | -0.015 | NA |
| chr9 | 140335758 | 140336321 | ENTPD8       | ENSG00000188833 | -138 | 0.27 | 0.23 | 0.7  | 0.04   | NA |
| chr9 | 17578721  | 17579804  | SH3GL2       | ENSG00000107295 | 309  | 0.2  | 0.19 | 0.71 | 0.013  | NA |
| chr9 | 35079628  | 35080213  | FANCG        | ENSG00000221829 | -254 | 0.22 | 0.24 | 0.71 | -0.022 | NA |
| chr9 | 99380814  | 99382236  | CDC14B       | ENSG00000081377 | -637 | 0.2  | 0.22 | 0.71 | -0.015 | NA |
| chr9 | 130159210 | 130160490 | SLC2A8       | ENSG00000136856 | 429  | 0.18 | 0.19 | 0.71 | -0.014 | NA |
| chr9 | 132586191 | 132586570 | TOR1A        | ENSG00000136827 | 3    | 0.25 | 0.22 | 0.71 | 0.029  | NA |
| chr9 | 19408498  | 19409285  | ACER2        | ENSG00000177076 | -34  | 0.22 | 0.2  | 0.72 | 0.024  | NA |
| chr9 | 74383077  | 74384702  | TMEM2        | ENSG00000135048 | -587 | 0.3  | 0.29 | 0.72 | 0.016  | NA |
| chr9 | 90795354  | 90795580  | RP11-1E11.1  | ENSG00000204429 | -117 | 0.95 | 1    | 0.72 | -0.055 | NA |
| chr9 | 125026828 | 125027250 | MRRF         | ENSG00000148187 | 157  | 0.2  | 0.26 | 0.72 | -0.055 | NA |
| chr9 | 130965464 | 130966516 | DNM1         | ENSG00000106976 | 332  | 0.23 | 0.24 | 0.72 | -0.012 | NA |
| chr9 | 139553659 | 139553915 | EGFL7        | ENSG00000172889 | 479  | 0.55 | 0.58 | 0.72 | -0.03  | NA |
| chr9 | 132199361 | 132199984 | RP11-65J3.2  | ENSG00000226355 | -823 | 0.2  | 0.23 | 0.73 | -0.025 | NA |
| chr9 | 136343980 | 136344764 | SLC2A6       | ENSG00000160326 | -175 | 0.22 | 0.2  | 0.73 | 0.029  | NA |
| chr9 | 77112712  | 77113583  | RORB         | ENSG00000198963 | 866  | 0.22 | 0.25 | 0.74 | -0.02  | NA |
| chr9 | 139701953 | 139703088 | C9orf86      | ENSG00000196642 | 146  | 0.21 | 0.23 | 0.74 | -0.012 | NA |
| chr9 | 15552733  | 15553334  | C9orf93      | ENSG00000164989 | 138  | 0.19 | 0.24 | 0.75 | -0.044 | NA |

|      |           |           |              |                 |       |      |      |      |         |    |
|------|-----------|-----------|--------------|-----------------|-------|------|------|------|---------|----|
| chr9 | 96213340  | 96214953  | FAM120AOS    | ENSG00000188938 | -750  | 0.24 | 0.25 | 0.75 | -0.014  | NA |
| chr9 | 136282680 | 136283483 | REXO4        | ENSG00000148300 | -162  | 0.24 | 0.22 | 0.75 | 0.014   | NA |
| chr9 | 35115701  | 35116446  | KIAA1539     | ENSG00000005238 | -226  | 0.2  | 0.17 | 0.76 | 0.038   | NA |
| chr9 | 8857485   | 8858708   | PTPRD        | ENSG00000153707 | -320  | 0.17 | 0.16 | 0.77 | 0.013   | NA |
| chr9 | 34380737  | 34381151  | C9orf24      | ENSG00000164972 | -163  | 0.19 | 0.17 | 0.77 | 0.017   | NA |
| chr9 | 34637200  | 34637950  | SIGMAR1      | ENSG00000147955 | -166  | 0.16 | 0.19 | 0.77 | -0.027  | NA |
| chr9 | 80645881  | 80647503  | GNAQ         | ENSG00000156052 | -318  | 0.23 | 0.22 | 0.77 | 0.0095  | NA |
| chr9 | 112262010 | 112262317 | PTPN3        | ENSG00000070159 | -1570 | 0.18 | 0.21 | 0.77 | -0.03   | NA |
| chr9 | 34646586  | 34647003  | GALT         | ENSG00000213930 | 161   | 0.26 | 0.22 | 0.79 | 0.037   | NA |
| chr9 | 77566773  | 77568038  | C9orf40      | ENSG00000135045 | 397   | 0.23 | 0.22 | 0.79 | 0.011   | NA |
| chr9 | 124261806 | 124262587 | GGTA1P       | ENSG00000204136 | -160  | 0.21 | 0.2  | 0.79 | 0.016   | NA |
| chr9 | 127020249 | 127020741 | NEK6         | ENSG00000119408 | 246   | 0.19 | 0.21 | 0.79 | -0.016  | NA |
| chr9 | 37422568  | 37422915  | GRHPR        | ENSG00000137106 | 78    | 0.27 | 0.25 | 0.8  | 0.026   | NA |
| chr9 | 140075158 | 140075375 | ANAPC2       | ENSG00000176248 | -337  | 0.97 | 1    | 0.8  | -0.025  | NA |
| chr9 | 214586    | 215431    | DOCK8        | ENSG00000107099 | 154   | 0.16 | 0.15 | 0.81 | 0.01    | NA |
| chr9 | 78507351  | 78507652  | PCSK5        | ENSG00000099139 | 1880  | 0.19 | 0.18 | 0.81 | 0.018   | NA |
| chr9 | 107688769 | 107689046 | RP11-217B7.2 | ENSG00000226334 | -927  | 0.33 | 0.28 | 0.81 | 0.05    | NA |
| chr9 | 131486215 | 131486754 | ZDHHC12      | ENSG00000160446 | -99   | 0.16 | 0.15 | 0.81 | 0.015   | NA |
| chr9 | 14348684  | 14349074  | RP11-120J1.1 | ENSG00000225472 | 1560  | 0.2  | 0.14 | 0.82 | 0.057   | NA |
| chr9 | 127905675 | 127905947 | SCAI         | ENSG00000173611 | -45   | 0.22 | 0.17 | 0.82 | 0.055   | NA |
| chr9 | 130213143 | 130214335 | RPL12        | ENSG00000197958 | -87   | 0.2  | 0.21 | 0.82 | -0.0078 | NA |
| chr9 | 130516407 | 130517849 | SH2D3C       | ENSG00000095370 | 181   | 0.21 | 0.22 | 0.82 | -0.0091 | NA |
| chr9 | 139914769 | 139915051 | ABCA2        | ENSG00000107331 | 347   | 0.98 | 0.93 | 0.82 | 0.055   | NA |
| chr9 | 35665059  | 35665364  | C9orf100     | ENSG00000137135 | -27   | 0.14 | 0.12 | 0.83 | 0.024   | NA |
| chr9 | 104248247 | 104249501 | C9orf125     | ENSG00000165152 | 525   | 0.18 | 0.19 | 0.83 | -0.01   | NA |
| chr9 | 133587865 | 133588901 | ABL1         | ENSG00000097007 | -885  | 0.23 | 0.24 | 0.83 | -0.011  | NA |
| chr9 | 139360683 | 139361143 | SEC16A       | ENSG00000148396 | -415  | 0.96 | 0.97 | 0.83 | -0.017  | NA |
| chr9 | 470108    | 470324    | KANK1        | ENSG00000107104 | -75   | 0.25 | 0.5  | 0.84 | -0.25   | NA |
| chr9 | 34048639  | 34049615  | UBAP2        | ENSG00000137073 | -257  | 0.36 | 0.47 | 0.84 | -0.11   | NA |
| chr9 | 139784322 | 139784693 | TRAF2        | ENSG00000127191 | 520   | 0.93 | 0.91 | 0.84 | 0.019   | NA |



|      |           |           |                |                 |      |      |      |      |         |    |
|------|-----------|-----------|----------------|-----------------|------|------|------|------|---------|----|
| chr9 | 140248250 | 140248615 | EXD3           | ENSG00000187609 | -209 | 0.89 | 0.9  | 0.84 | -0.016  | NA |
| chr9 | 15232687  | 15232937  | TTC39B         | ENSG00000155158 | -370 | 1    | 0.97 | 0.86 | 0.029   | NA |
| chr9 | 33510858  | 33511221  | AL139008.1     | ENSG00000226823 | -330 | 0.16 | 0.15 | 0.86 | 0.012   | NA |
| chr9 | 90112514  | 90113817  | DAPK1          | ENSG00000196730 | 569  | 0.22 | 0.21 | 0.86 | 0.0093  | NA |
| chr9 | 90589209  | 90589807  | CDK20          | ENSG00000156345 | -4   | 0.21 | 0.18 | 0.86 | 0.023   | NA |
| chr9 | 93404976  | 93405313  | DIRAS2         | ENSG00000165023 | 242  | 0.17 | 0.2  | 0.86 | -0.032  | NA |
| chr9 | 99212164  | 99213507  | HABP4          | ENSG00000130956 | 352  | 0.24 | 0.25 | 0.86 | -0.0081 | NA |
| chr9 | 129244737 | 129245247 | FAM125B        | ENSG00000196814 | 1900 | 0.23 | 0.2  | 0.86 | 0.029   | NA |
| chr9 | 102761262 | 102761485 | UPF3AP3        | ENSG00000234709 | -22  | 0.98 | 0.92 | 0.87 | 0.062   | NA |
| chr9 | 108320245 | 108320640 | RP11-235C23.5  | ENSG00000228317 | -132 | 0.21 | 0.19 | 0.87 | 0.018   | NA |
| chr9 | 130689378 | 130690215 | PIP5KL1        | ENSG00000167103 | -331 | 0.24 | 0.25 | 0.87 | -0.013  | NA |
| chr9 | 136399367 | 136400274 | ADAMTSL2       | ENSG00000197859 | 389  | 0.22 | 0.2  | 0.87 | 0.015   | NA |
| chr9 | 116037549 | 116038229 | PRPF4          | ENSG00000136875 | 266  | 0.23 | 0.2  | 0.88 | 0.028   | NA |
| chr9 | 116225763 | 116226133 | RGS3           | ENSG00000138835 | -61  | 0.18 | 0.17 | 0.88 | 0.0073  | NA |
| chr9 | 135282052 | 135282315 | TTF1           | ENSG00000125482 | 26   | 0.2  | 0.17 | 0.88 | 0.029   | NA |
| chr9 | 140134706 | 140136568 | TUBB2C         | ENSG00000188229 | -28  | 0.21 | 0.2  | 0.88 | 0.0052  | NA |
| chr9 | 2843965   | 2844308   | KIAA0020       | ENSG00000080608 | 105  | 0.17 | 0.15 | 0.89 | 0.024   | NA |
| chr9 | 86237966  | 86238536  | C9orf103       | ENSG00000148057 | 285  | 0.25 | 0.27 | 0.89 | -0.014  | NA |
| chr9 | 135995969 | 135996954 | RALGDS         | ENSG00000160271 | 82   | 0.2  | 0.19 | 0.89 | 0.011   | NA |
| chr9 | 77111778  | 77112042  | RORB           | ENSG00000198963 | -371 | 0.22 | 0.23 | 0.9  | -0.013  | NA |
| chr9 | 130331537 | 130331934 | FAM129B        | ENSG00000136830 | -368 | 0.2  | 0.29 | 0.9  | -0.092  | NA |
| chr9 | 134954960 | 134955335 | MED27          | ENSG00000160563 | 106  | 0.19 | 0.21 | 0.9  | -0.024  | NA |
| chr9 | 140061735 | 140064864 | GRIN1          | ENSG00000176884 | 924  | 0.19 | 0.19 | 0.9  | 0.0036  | NA |
| chr9 | 140317160 | 140318663 | EXD3           | ENSG00000187609 | -304 | 0.21 | 0.2  | 0.9  | 0.0049  | NA |
| chr9 | 140683120 | 140683774 | RP11-188C12.2  | ENSG00000255585 | -308 | 0.91 | 0.92 | 0.9  | -0.016  | NA |
| chr9 | 66455767  | 66456272  | RP11-262H14.10 | ENSG00000236215 | 1078 | 0.47 | 0.47 | 0.91 | -0.0043 | NA |
| chr9 | 127623557 | 127624486 | RPL35          | ENSG00000136942 | -186 | 0.28 | 0.27 | 0.91 | 0.015   | NA |
| chr9 | 131591751 | 131592246 | C9orf114       | ENSG00000198917 | 60   | 0.18 | 0.17 | 0.91 | 0.011   | NA |
| chr9 | 138593527 | 138594253 | KCNT1          | ENSG00000107147 | -141 | 0.22 | 0.24 | 0.91 | -0.016  | NA |
| chr9 | 35756948  | 35757339  | MSMP           | ENSG00000215183 | -533 | 0.22 | 0.24 | 0.92 | -0.016  | NA |

|      |           |           |               |                 |       |      |      |      |         |    |
|------|-----------|-----------|---------------|-----------------|-------|------|------|------|---------|----|
| chr9 | 38392509  | 38393187  | ALDH1B1       | ENSG00000137124 | 187   | 0.18 | 0.19 | 0.92 | -0.009  | NA |
| chr9 | 77113709  | 77113927  | RP11-171A24.3 | ENSG00000224825 | 225   | 0.28 | 0.17 | 0.92 | 0.11    | NA |
| chr9 | 133569082 | 133569451 | EXOSC2        | ENSG00000130713 | 158   | 0.33 | 0.27 | 0.92 | 0.06    | NA |
| chr9 | 93879725  | 93880618  | RP11-305L7.6  | ENSG00000229694 | -1173 | 0.78 | 0.81 | 0.93 | -0.027  | NA |
| chr9 | 95820744  | 95821526  | SUSD3         | ENSG00000157303 | 146   | 0.24 | 0.23 | 0.93 | 0.0086  | NA |
| chr9 | 132427908 | 132428171 | PRRX2         | ENSG00000167157 | 119   | 0.24 | 0.22 | 0.93 | 0.016   | NA |
| chr9 | 133534534 | 133542394 | PRDM12        | ENSG00000130711 | -1517 | 0.29 | 0.29 | 0.93 | -0.0018 | NA |
| chr9 | 2621308   | 2623685   | RP11-125B21.2 | ENSG00000236404 | -1083 | 0.22 | 0.23 | 0.94 | -0.0069 | NA |
| chr9 | 16726859  | 16727273  | RP11-62F24.2  | ENSG00000234779 | 254   | 0.22 | 0.24 | 0.94 | -0.011  | NA |
| chr9 | 36036798  | 36037564  | RECK          | ENSG00000122707 | 260   | 0.22 | 0.21 | 0.94 | 0.012   | NA |
| chr9 | 88555701  | 88556638  | NAA35         | ENSG00000135040 | 108   | 0.26 | 0.27 | 0.94 | -0.0058 | NA |
| chr9 | 116930004 | 116930368 | COL27A1       | ENSG00000196739 | 191   | 0.38 | 0.37 | 0.94 | 0.0094  | NA |
| chr9 | 130533453 | 130533882 | SH2D3C        | ENSG00000095370 | 50    | 0.28 | 0.26 | 0.94 | 0.013   | NA |
| chr9 | 130953519 | 130954251 | CIZ1          | ENSG00000148337 | -154  | 0.24 | 0.25 | 0.94 | -0.0083 | NA |
| chr9 | 4679325   | 4679999   | CDC37L1       | ENSG00000106993 | 103   | 0.18 | 0.17 | 0.95 | 0.0093  | NA |
| chr9 | 7799355   | 7799846   | C9orf123      | ENSG00000137038 | 467   | 0.15 | 0.16 | 0.95 | -0.013  | NA |
| chr9 | 19102470  | 19103110  | HAUS6         | ENSG00000147874 | 327   | 0.25 | 0.24 | 0.95 | 0.0094  | NA |
| chr9 | 92219771  | 92221411  | GADD45G       | ENSG00000130222 | 663   | 0.21 | 0.21 | 0.95 | 0.0039  | NA |
| chr9 | 130551609 | 130551831 | CDK9          | ENSG00000136807 | 1019  | 0.87 | 0.89 | 0.95 | -0.016  | NA |
| chr9 | 139802417 | 139802824 | TRAF2         | ENSG00000127191 | 32    | 0.95 | 1    | 0.95 | -0.047  | NA |
| chr9 | 19127179  | 19127880  | PLIN2         | ENSG00000147872 | -56   | 0.31 | 0.31 | 0.96 | 0.0077  | NA |
| chr9 | 35603968  | 35605991  | TESK1         | ENSG00000107140 | -302  | 0.23 | 0.23 | 0.96 | -0.0032 | NA |
| chr9 | 108210085 | 108210753 | FSD1L         | ENSG00000106701 | 104   | 0.21 | 0.2  | 0.96 | 0.0058  | NA |
| chr9 | 124461797 | 124462190 | DAB2IP        | ENSG00000136848 | 344   | 0.23 | 0.24 | 0.96 | -0.0076 | NA |
| chr9 | 131182468 | 131183335 | CERCAM        | ENSG00000167123 | 142   | 0.25 | 0.24 | 0.96 | 0.008   | NA |
| chr9 | 100395340 | 100396414 | TSTD2         | ENSG00000136925 | -294  | 0.21 | 0.21 | 0.97 | -0.0044 | NA |
| chr9 | 139844292 | 139844693 | LCN12         | ENSG00000184925 | 489   | 0.15 | 0.16 | 0.97 | -0.0082 | NA |
| chr9 | 20620728  | 20621862  | MLLT3         | ENSG00000171843 | -135  | 0.33 | 0.34 | 0.98 | -0.015  | NA |
| chr9 | 100881098 | 100881660 | TRIM14        | ENSG00000106785 | -172  | 0.27 | 0.26 | 0.98 | 0.0071  | NA |
| chr9 | 5110784   | 5112274   | RP11-39K24.7  | ENSG00000236567 | 616   | 0.99 | 0.99 | 1    | 0.00072 | NA |

|      |          |          |               |                 |       |      |      |   |         |    |
|------|----------|----------|---------------|-----------------|-------|------|------|---|---------|----|
| chr9 | 178851   | 179249   | CBWD1         | ENSG00000172785 | -32   | 0.25 | 0.25 | 1 | 0       | NA |
| chr9 | 4804490  | 4804780  | RP11-307114.3 | ENSG00000233186 | 337   | 0.98 | 0.98 | 1 | 0.00044 | NA |
| chr9 | 5040734  | 5041922  | RP11-39K24.2  | ENSG00000234534 | 383   | 0.98 | 0.97 | 1 | 0.0027  | NA |
| chr9 | 5042797  | 5043270  | JAK2          | ENSG00000096968 | -1397 | 0.93 | 0.96 | 1 | -0.027  | NA |
| chr9 | 6703948  | 6704662  | RP11-390F4.10 | ENSG00000229611 | -166  | 0.16 | 0.18 | 1 | -0.014  | NA |
| chr9 | 8713281  | 8713891  | RP11-134K1.2  | ENSG00000212695 | 275   | 0.99 | 0.99 | 1 | 0.00082 | NA |
| chr9 | 12775486 | 12775813 | C9orf150      | ENSG00000153714 | -18   | 0.14 | 0.14 | 1 | -0.0076 | NA |
| chr9 | 15306722 | 15307386 | TTC39B        | ENSG00000155158 | 153   | 0.17 | 0.17 | 1 | 0.0034  | NA |
| chr9 | 15527652 | 15527881 | FTH1P12       | ENSG00000213362 | -85   | 1    | 1    | 1 | 0       | NA |
| chr9 | 29826526 | 29826736 | RP11-460C6.1  | ENSG00000230097 | 78    | 0.99 | 1    | 1 | -0.012  | NA |
| chr9 | 31253816 | 31254763 | RP11-572H4.2  | ENSG00000232203 | 390   | 0.98 | 0.99 | 1 | -0.0039 | NA |
| chr9 | 32384420 | 32384911 | ACO1          | ENSG00000122729 | 64    | 0.18 | 0.18 | 1 | -0.0043 | NA |
| chr9 | 32566741 | 32567004 | TIGD1L2       | ENSG00000241043 | 85    | 0.93 | 0.94 | 1 | -0.0024 | NA |
| chr9 | 33001216 | 33001668 | APTX          | ENSG00000137074 | 77    | 0.22 | 0.25 | 1 | -0.035  | NA |
| chr9 | 33750519 | 33751160 | PRSS3         | ENSG0000010438  | 151   | 0.25 | 0.24 | 1 | 0.0031  | NA |
| chr9 | 34134615 | 34134819 | RP11-537H15.4 | ENSG00000239392 | -23   | 0.97 | 0.97 | 1 | 0.0026  | NA |
| chr9 | 34178951 | 34179480 | UBAP1         | ENSG00000165006 | 212   | 0.29 | 0.3  | 1 | -0.0067 | NA |
| chr9 | 34522724 | 34523357 | ENHO          | ENSG00000168913 | -13   | 0.19 | 0.19 | 1 | 0.0068  | NA |
| chr9 | 35102695 | 35103463 | STOML2        | ENSG00000165283 | -307  | 0.23 | 0.22 | 1 | 0.0047  | NA |
| chr9 | 35790823 | 35791149 | NPR2          | ENSG00000159899 | -1165 | 0.22 | 0.21 | 1 | 0.009   | NA |
| chr9 | 36190870 | 36191536 | CLTA          | ENSG00000122705 | 283   | 0.28 | 0.28 | 1 | -0.0015 | NA |
| chr9 | 37592198 | 37592734 | RP11-613M10.8 | ENSG00000256966 | 0     | 0.21 | 0.21 | 1 | -0.0028 | NA |
| chr9 | 39464187 | 39464617 | BX248098.1    | ENSG00000198416 | 124   | 1    | 1    | 1 | 0       | NA |
| chr9 | 39817324 | 39817937 | BX088645.3    | ENSG00000225529 | -322  | 0.19 | 0.18 | 1 | 0.0086  | NA |
| chr9 | 42367086 | 42368730 | RP11-216M21.7 | ENSG00000233207 | -816  | 0.39 | 0.5  | 1 | -0.11   | NA |
| chr9 | 66553464 | 66553828 | RP11-262H14.3 | ENSG00000234665 | 265   | 1    | 1    | 1 | 0       | NA |
| chr9 | 67925459 | 67927188 | ANKRD20A1     | ENSG00000196774 | -438  | 0.43 | 0.4  | 1 | 0.035   | NA |
| chr9 | 70917888 | 70919111 | FOX4L3        | ENSG00000187559 | 1223  | 0.88 | 1    | 1 | -0.12   | NA |
| chr9 | 72286804 | 72288081 | APBA1         | ENSG00000107282 | -220  | 0.21 | 0.21 | 1 | 0.0022  | NA |
| chr9 | 78505230 | 78505483 | PCSK5         | ENSG00000099139 | -204  | 0.33 | 0.38 | 1 | -0.042  | NA |

|      |           |           |               |                 |      |      |      |   |         |    |
|------|-----------|-----------|---------------|-----------------|------|------|------|---|---------|----|
| chr9 | 78505603  | 78507120  | PCSK5         | ENSG00000099139 | 740  | 0.24 | 0.24 | 1 | -0.0015 | NA |
| chr9 | 79073907  | 79074561  | GCNT1         | ENSG00000187210 | 166  | 0.24 | 0.23 | 1 | 0.0034  | NA |
| chr9 | 80765851  | 80766122  | RP11-336N8.1  | ENSG00000233457 | 123  | 1    | 1    | 1 | 0       | NA |
| chr9 | 80911779  | 80912611  | PSAT1         | ENSG00000135069 | 152  | 0.34 | 0.34 | 1 | 0.0028  | NA |
| chr9 | 86571047  | 86572027  | C9orf64       | ENSG00000165118 | -294 | 0.16 | 0.15 | 1 | 0.00086 | NA |
| chr9 | 91792662  | 91793611  | SHC3          | ENSG00000148082 | 546  | 0.19 | 0.19 | 1 | -0.0001 | NA |
| chr9 | 91995951  | 91996230  | SEMA4D        | ENSG00000187764 | 12   | 1    | 0.97 | 1 | 0.033   | NA |
| chr9 | 95896007  | 95897016  | NINJ1         | ENSG00000131669 | -10  | 0.2  | 0.2  | 1 | -0.004  | NA |
| chr9 | 96055059  | 96055412  | WNK2          | ENSG00000165238 | -136 | 0.93 | 0.93 | 1 | -0.0004 | NA |
| chr9 | 97094626  | 97095058  | RP11-307E17.8 | ENSG00000232063 | 84   | 0.5  | 1    | 1 | -0.5    | NA |
| chr9 | 99775098  | 99776102  | HIATL2        | ENSG00000196312 | 262  | 0.14 | 0.16 | 1 | -0.02   | NA |
| chr9 | 100000463 | 100000820 | RP11-23J9.5   | ENSG00000254876 | -90  | 0.2  | 0.19 | 1 | 0.0081  | NA |
| chr9 | 102860775 | 102861677 | ERP44         | ENSG00000023318 | 96   | 0.31 | 0.31 | 1 | -0.0026 | NA |
| chr9 | 104295917 | 104296232 | RNF20         | ENSG00000155827 | -59  | 0.14 | 0.17 | 1 | -0.031  | NA |
| chr9 | 106855962 | 106856793 | SMC2          | ENSG00000136824 | -164 | 0.2  | 0.2  | 1 | #####   | NA |
| chr9 | 108282047 | 108282289 | RALGAPA1P     | ENSG00000229419 | -241 | 1    | 1    | 1 | 0       | NA |
| chr9 | 114557287 | 114557576 | C9orf84       | ENSG00000165181 | -143 | 0.94 | 0.94 | 1 | 0.0031  | NA |
| chr9 | 115141854 | 115142638 | HSDL2         | ENSG00000119471 | 29   | 0.18 | 0.33 | 1 | -0.16   | NA |
| chr9 | 116917701 | 116918018 | COL27A1       | ENSG00000196739 | 19   | 0.33 | 0.37 | 1 | -0.042  | NA |
| chr9 | 116918299 | 116918522 | COL27A1       | ENSG00000196739 | 179  | 0.3  | 0.21 | 1 | 0.086   | NA |
| chr9 | 117349887 | 117350388 | ATP6V1G1      | ENSG00000136888 | 111  | 0.23 | 0.25 | 1 | -0.017  | NA |
| chr9 | 117373484 | 117374076 | C9orf91       | ENSG00000157693 | 294  | 0.24 | 0.23 | 1 | 0.0097  | NA |
| chr9 | 119976797 | 119977010 | ASTN2         | ENSG00000148219 | -71  | 0.98 | 1    | 1 | -0.016  | NA |
| chr9 | 126030891 | 126031347 | STRBP         | ENSG00000165209 | -264 | 0.23 | 0.24 | 1 | -0.0038 | NA |
| chr9 | 126770663 | 126772091 | RP11-85O21.2  | ENSG00000236668 | 139  | 0.27 | 0.28 | 1 | -0.0058 | NA |
| chr9 | 127212624 | 127213064 | GPR144        | ENSG00000180264 | -579 | 0.33 | 0.3  | 1 | 0.037   | NA |
| chr9 | 127962543 | 127963125 | RABEPK        | ENSG00000136933 | 13   | 0.18 | 0.19 | 1 | -0.0085 | NA |
| chr9 | 130330540 | 130331180 | FAM129B       | ENSG00000136830 | 304  | 0.2  | 0.2  | 1 | 0.0048  | NA |
| chr9 | 130674546 | 130674958 | ST6GALNAC4    | ENSG00000136840 | -79  | 0.93 | 0.94 | 1 | -0.0073 | NA |
| chr9 | 130679120 | 130679612 | ST6GALNAC4    | ENSG00000136840 | -91  | 0.16 | 0.16 | 1 | -0.0035 | NA |

|      |           |           |              |                 |       |      |      |    |         |    |
|------|-----------|-----------|--------------|-----------------|-------|------|------|----|---------|----|
| chr9 | 130699759 | 130700266 | DPM2         | ENSG00000136908 | 46    | 0.21 | 0.2  | 1  | 0.0048  | NA |
| chr9 | 131102450 | 131103298 | SLC27A4      | ENSG00000167114 | -51   | 0.21 | 0.21 | 1  | 0.0036  | NA |
| chr9 | 131842931 | 131843748 | DOLPP1       | ENSG00000167130 | -40   | 0.22 | 0.21 | 1  | 0.0045  | NA |
| chr9 | 132082871 | 132083582 | C9orf106     | ENSG00000179082 | -69   | 0.19 | 0.19 | 1  | -0.0029 | NA |
| chr9 | 132636786 | 132637221 | USP20        | ENSG00000136878 | -873  | 0.94 | 0.94 | 1  | 0.0047  | NA |
| chr9 | 132934213 | 132934483 | NCS1         | ENSG00000107130 | -509  | 0.29 | 0.27 | 1  | 0.013   | NA |
| chr9 | 132935029 | 132935543 | NCS1         | ENSG00000107130 | 429   | 0.19 | 0.19 | 1  | -0.0033 | NA |
| chr9 | 133454629 | 133455496 | FUBP3        | ENSG00000107164 | 102   | 0.26 | 0.26 | 1  | -0.0031 | NA |
| chr9 | 134378193 | 134378792 | POMT1        | ENSG00000130714 | 203   | 0.27 | 0.26 | 1  | 0.0078  | NA |
| chr9 | 136198674 | 136199173 | SURF6        | ENSG00000148296 | 852   | 0.96 | 0.96 | 1  | 0.003   | NA |
| chr9 | 136293566 | 136294160 | ADAMTS13     | ENSG00000160323 | 112   | 0.22 | 0.22 | 1  | 0.0052  | NA |
| chr9 | 136919143 | 136919376 | BRD3         | ENSG00000169925 | 3     | 0.87 | 0.86 | 1  | 0.014   | NA |
| chr9 | 137218620 | 137218968 | RXRA         | ENSG00000186350 | 368   | 0.4  | 0.43 | 1  | -0.031  | NA |
| chr9 | 137978821 | 137980254 | OLFM1        | ENSG00000130558 | 431   | 0.26 | 0.26 | 1  | 0.00063 | NA |
| chr9 | 137980463 | 137980852 | OLFM1        | ENSG00000130558 | 1072  | 0.25 | 0.24 | 1  | 0.0057  | NA |
| chr9 | 138626544 | 138626789 | KCNT1        | ENSG00000107147 | -1699 | 1    | 1    | 1  | 0       | NA |
| chr9 | 138798462 | 138800325 | CAMSAP1      | ENSG00000130559 | -323  | 0.19 | 0.19 | 1  | -0.0022 | NA |
| chr9 | 138941470 | 138944021 | NACC2        | ENSG00000148411 | -319  | 1    | 0.53 | 1  | 0.47    | NA |
| chr9 | 139096665 | 139096993 | LHX3         | ENSG00000107187 | 126   | 0.38 | 0.37 | 1  | 0.0046  | NA |
| chr9 | 139262001 | 139262396 | CARD9        | ENSG00000187796 | -116  | 0.94 | 0.94 | 1  | -0.0051 | NA |
| chr9 | 139294086 | 139294813 | SNAPC4       | ENSG00000165684 | -1200 | 0.2  | 0.19 | 1  | 0.0032  | NA |
| chr9 | 140262925 | 140263236 | EXD3         | ENSG00000187609 | -1996 | 0.94 | 0.95 | 1  | -0.0096 | NA |
| chr9 | 140375366 | 140375581 | PNPLA7       | ENSG00000130653 | -294  | 1    | 1    | 1  | 0       | NA |
| chr9 | 141069395 | 141070191 | TUBBP5       | ENSG00000159247 | 356   | 0.98 | 0.97 | 1  | 0.0095  | NA |
| chr9 | 5303860   | 5304476   | RLN2         | ENSG00000107014 | 264   | NA   | 1    | NA | NA      | NA |
| chr9 | 5339026   | 5339678   | RLN1         | ENSG00000107018 | 273   | 0.5  | NA   | NA | NA      | NA |
| chr9 | 21968358  | 21968728  | C9orf53      | ENSG00000224854 | 1406  | 0.44 | NA   | NA | NA      | NA |
| chr9 | 27528357  | 27528725  | MOBKL2B      | ENSG00000120162 | 1238  | 0.34 | NA   | NA | NA      | NA |
| chr9 | 27573759  | 27573987  | C9orf72      | ENSG00000147894 | -9    | 0.5  | NA   | NA | NA      | NA |
| chr9 | 33019921  | 33020146  | RP11-54K16.2 | ENSG00000225693 | 130   | 1    | NA   | NA | NA      | NA |

|      |           |           |               |                 |      |      |      |    |    |    |
|------|-----------|-----------|---------------|-----------------|------|------|------|----|----|----|
| chr9 | 34318282  | 34318948  | RP11-571F15.6 | ENSG00000229207 | 210  | 0.97 | NA   | NA | NA | NA |
| chr9 | 37753655  | 37753949  | RG9MTD3       | ENSG00000165275 | -2   | 0.5  | NA   | NA | NA | NA |
| chr9 | 41433336  | 41433949  | RP11-144A16.1 | ENSG00000234138 | -322 | 1    | NA   | NA | NA | NA |
| chr9 | 45733487  | 45733690  | FAM27E2       | ENSG00000204807 | 29   | 0.67 | NA   | NA | NA | NA |
| chr9 | 68809168  | 68810258  | PGM5P1        | ENSG00000204794 | 185  | NA   | 0.22 | NA | NA | NA |
| chr9 | 115774295 | 115774615 | ZNF883        | ENSG00000228623 | 52   | 0.33 | NA   | NA | NA | NA |
| chr9 | 127177366 | 127177818 | PSMB7         | ENSG00000136930 | -22  | 0.2  | NA   | NA | NA | NA |
| chr9 | 129595357 | 129595584 | ZBTB43        | ENSG00000169155 | 1782 | 1    | NA   | NA | NA | NA |
| chr9 | 132428495 | 132428809 | PRRX2         | ENSG00000167157 | 732  | 0.31 | NA   | NA | NA | NA |
| chr9 | 134269881 | 134270252 | PRRC2B        | ENSG00000130723 | 466  | 0.35 | NA   | NA | NA | NA |
| chr9 | 139228816 | 139229229 | GPSM1         | ENSG00000160360 | 117  | 0.82 | NA   | NA | NA | NA |
| chr9 | 139589028 | 139589256 | AL590226.1    | ENSG00000221693 | 554  | 1    | NA   | NA | NA | NA |
| chr9 | 140005167 | 140005373 | DPP7          | ENSG00000176978 | 1397 | 1    | NA   | NA | NA | NA |
| chr9 | 140417626 | 140417856 | PNPLA7        | ENSG00000130653 | -445 | 0.8  | NA   | NA | NA | NA |

**Table S2.** RRBS data for promoter CpG islands in mouse models of medulloblastoma compared to normal cere

Methylation status for statistically significant ( $p < 1E-09$ ) promoter CpG islands ( $\pm$  2kb from TSS) are shown. Methylation status is annotated with respect to tumor compared to strain-specific normal controls: hyper1 = 1-32% hypermethylation; hyper2 = 33-59% hypermethylation; hyper3 = >60% hypermethylation; hypo1 = 1-32%

| chr   | start     | end       | gene_name     | gene_id             | dist  | mMYCN1.ratio | mMYCN2.ratio | mSmoA1.ratio | mSmoA2.ratio | mWTCbl_MYCN.ratio | mWTCbl_Smo.ratio |
|-------|-----------|-----------|---------------|---------------------|-------|--------------|--------------|--------------|--------------|-------------------|------------------|
| chr12 | 20821040  | 20821877  | 1700030C10Rik | ENSMUSG000000091071 | 130   | 0.73         | 0.76         | 0.59         | 0.61         | 0.46              | 0.42             |
| chr13 | 120276779 | 120277928 | Gm71120       | ENSMUSG000000074634 | 507   | 0.72         | 0.72         | 0.53         | 0.68         | 0.62              | 0.46             |
| chr19 | 61300996  | 61303817  | Csf2ra        | ENSMUSG000000059326 | 1915  | 0.13         | 0.34         | 0.26         | 0.36         | 0.16              | 0.17             |
| chr4  | 146649246 | 146650225 | Gm13135       | ENSMUSG000000082925 | -350  | 0.59         | 0.64         | 0.46         | 0.63         | 0.28              | 0.31             |
| chr7  | 149268099 | 149268647 | Dusp8         | ENSMUSG000000043186 | -1781 | 0.49         | 0.63         | 0.64         | 0.63         | 0.29              | 0.43             |
| chr2  | 56964017  | 56964500  | Nr4a2         | ENSMUSG000000026826 | 1225  | 0.8          | 0.86         | 0.76         | 0.76         | 0.22              | 0.58             |
| chr17 | 39985165  | 39985768  | AY036118      | ENSMUSG000000045999 | 306   | 0.36         | 0.19         | 0.24         | 0.49         | 0.36              | 0.18             |
| chr10 | 79197827  | 79198908  | Polrmt        | ENSMUSG000000020329 | 1146  | 0.19         | 0.43         | 0.72         | 0.9          | 0.51              | 0.59             |
| chr12 | 19612233  | 19613090  | Gm9257        | ENSMUSG000000078375 | -123  | 0.19         | 0.1          | 0.68         | 0.71         | 0.07              | 0.46             |
| chr13 | 72765765  | 72769439  | Gm20554       | ENSMUSG000000093587 | -1590 | 0.23         | 0.13         | 0.26         | 0.35         | 0.09              | 0.17             |
| chr14 | 64562196  | 64563143  | Sox7          | ENSMUSG000000063060 | 158   | 0.13         | 0.18         | 0.29         | 0.28         | 0.16              | 0.16             |
| chr17 | 12961924  | 12962875  | Igf2r         | ENSMUSG000000023830 | 131   | 0.21         | 0.18         | 0.33         | 0.35         | 0.12              | 0.13             |
| chr17 | 91487264  | 91488118  | Nrxn1         | ENSMUSG000000024109 | 132   | 0.94         | 0.94         | 0.92         | 0.9          | 0.93              | 0.72             |
| chr2  | 147864267 | 147864552 | 9030622O22Rik | ENSMUSG000000086141 | -403  | 0.25         | 0.31         | 0.44         | 0.56         | 0.11              | 0.23             |
| chr4  | 145426544 | 145427367 | Gm13238       | ENSMUSG000000082999 | -167  | 0.73         | 0.72         | 0.75         | 0.86         | 0.55              | 0.6              |
| chr7  | 64764362  | 64765526  | Gabra5        | ENSMUSG000000055078 | 435   | 0.26         | 0.13         | 0.2          | 0.42         | 0.11              | 0.1              |
| chr12 | 81858401  | 81860412  | Gm17242       | ENSMUSG000000092063 | 13    | 0.82         | 0.33         | 0.36         | 0.78         | 0.41              | 0.49             |
| chr16 | 18588135  | 18589132  | Tbx1          | ENSMUSG00000009097  | -520  | 0.28         | 0.29         | 0.21         | 0.29         | 0.11              | 0.15             |
| chr3  | 82679799  | 82680624  | Rbm46         | ENSMUSG000000033882 | 194   | 0.38         | 0.42         | 0.18         | 0.46         | 0.21              | 0.22             |
| chr7  | 4981801   | 4983585   | Zfp865        | ENSMUSG000000074405 | 1062  | 0.97         | 0.98         | 0.92         | 0.94         | 0.81              | 0.85             |
| chr9  | 58159462  | 58160927  | Loxl1         | ENSMUSG000000032334 | 797   | 0.43         | 0.4          | 0.29         | 0.51         | 0.14              | 0.25             |
| chr11 | 116195519 | 116197049 | Foxj1         | ENSMUSG000000034227 | 429   | 0.47         | 0.38         | 0.2          | 0.36         | 0.13              | 0.19             |
| chr5  | 143005728 | 143006161 | Pap0lb        | ENSMUSG000000074817 | 86    | 0.94         | 0.71         | 0.54         | 0.79         | 0.42              | 0.62             |

|       |           |           |               |                     |       |      |      |      |      |      |      |
|-------|-----------|-----------|---------------|---------------------|-------|------|------|------|------|------|------|
| chr7  | 150644960 | 150647382 | Cdkn1c        | ENSMUSG000000037664 | 784   | 0.46 | 0.49 | 0.29 | 0.42 | 0.32 | 0.3  |
| chr7  | 114352691 | 114354099 | Rbmxl2        | ENSMUSG000000073894 | 436   | 0.39 | 0.56 | 0.37 | 0.52 | 0.22 | 0.32 |
| chr7  | 112910654 | 112911327 | Gm15645       | ENSMUSG000000086414 | 155   | 0.8  | 0.81 | 0.67 | 0.8  | 0.45 | 0.62 |
| chr13 | 113442167 | 113442711 | Ddx4          | ENSMUSG000000021758 | 79    | 0.98 | 0.86 | 0.78 | 0.91 | 0.76 | 0.67 |
| chr11 | 102526482 | 102527772 | Gm1564        | ENSMUSG000000051455 | 225   | 0.86 | 0.69 | 0.52 | 0.83 | 0.46 | 0.55 |
| chr1  | 134086664 | 134087732 | Lemd1         | ENSMUSG000000079330 | -815  | 0.08 | 0.07 | 0.12 | 0.28 | 0.18 | 0.13 |
| chr1  | 14745232  | 14745884  | Gm9947        | ENSMUSG000000054493 | 23    | 0.22 | 0.31 | 0.19 | 0.43 | 0.14 | 0.16 |
| chr1  | 165242132 | 165242752 | Prrx1         | ENSMUSG000000026586 | 1357  | 0.13 | 0.12 | 0.17 | 0.33 | 0.12 | 0.14 |
| chr1  | 9289296   | 9290101   | Sntg1         | ENSMUSG000000025909 | -379  | 0.2  | 0.11 | 0.11 | 0.28 | 0.17 | 0.1  |
| chr1  | 182260686 | 182262998 | Gm5069        | ENSMUSG000000055676 | -1161 | 0.22 | 0.29 | 0.12 | 0.3  | 0.21 | 0.15 |
| chr10 | 79256221  | 79256597  | Palm          | ENSMUSG000000035863 | 92    | 0.67 | 0.22 | 0.07 | 0.26 | 0.07 | 0.11 |
| chr10 | 7500201   | 7500664   | BC013529      | ENSMUSG000000040006 | 257   | 0.19 | 0.1  | 0.11 | 0.26 | 0.07 | 0.12 |
| chr10 | 79451126  | 79451576  | Cnn2          | ENSMUSG000000004665 | 22    | 0.33 | 0.34 | 0.16 | 0.38 | 0.23 | 0.14 |
| chr10 | 110181978 | 110182829 | E2f7          | ENSMUSG000000020185 | -92   | 0.12 | 0.19 | 0.22 | 0.33 | 0.15 | 0.19 |
| chr10 | 80809299  | 80809806  | Hmg20b        | ENSMUSG000000020232 | -77   | 0.19 | 0.34 | 0.42 | 0.6  | 0.19 | 0.35 |
| chr11 | 11936492  | 11938111  | Grb10         | ENSMUSG000000020176 | 103   | 0.12 | 0.2  | 0.16 | 0.29 | 0.19 | 0.17 |
| chr11 | 4035226   | 4035536   | Rnf215        | ENSMUSG000000003581 | 96    | 0.44 | 0.54 | 0.08 | 0.37 | 0.19 | 0.08 |
| chr11 | 49659901  | 49660774  | Mapk9         | ENSMUSG000000020366 | 84    | 0.1  | 0.14 | 0.1  | 0.21 | 0.16 | 0.09 |
| chr11 | 120478895 | 120479342 | Pcyt2         | ENSMUSG000000025137 | 65    | 0.11 | 0.17 | 0.06 | 0.18 | 0.08 | 0.07 |
| chr11 | 19824382  | 19825905  | Spred2        | ENSMUSG000000045671 | 698   | 0.11 | 0.11 | 0.11 | 0.23 | 0.09 | 0.11 |
| chr12 | 22510336  | 22511073  | Gm20487       | ENSMUSG000000092484 | 228   | 0.3  | 0.24 | 0.38 | 0.54 | 0.16 | 0.22 |
| chr12 | 11272573  | 11273422  | Gen1          | ENSMUSG000000051235 | -404  | 0.2  | 0.22 | 0.11 | 0.21 | 0.4  | 0.11 |
| chr12 | 24781526  | 24782353  | 9030624G23Rik | ENSMUSG000000073158 | -106  | 0.45 | 0.44 | 0.34 | 0.49 | 0.21 | 0.21 |
| chr12 | 33832178  | 33832759  | F730043M19Rik | ENSMUSG000000052125 | -17   | 0.44 | 0.14 | 0.12 | 0.29 | 0.31 | 0.14 |
| chr12 | 89598935  | 89599272  | Adck1         | ENSMUSG000000021044 | 105   | 0.18 | 0.18 | 0.2  | 0.28 | 0.11 | 0.09 |
| chr12 | 58676925  | 58677593  | Ttc6          | ENSMUSG000000046782 | 455   | 0.16 | 0.15 | 0.14 | 0.36 | 0.13 | 0.13 |
| chr12 | 14156488  | 14157450  | Fam84a        | ENSMUSG000000020607 | 1875  | 0.17 | 0.07 | 0.13 | 0.39 | 0.11 | 0.12 |
| chr12 | 85910817  | 85911286  | Vsx2          | ENSMUSG000000021239 | 261   | 0.16 | 0.16 | 0.28 | 0.44 | 0.16 | 0.16 |
| chr13 | 3609756   | 3610553   | BC016423      | ENSMUSG000000033799 | 200   | 0.5  | 0.27 | 0.14 | 0.33 | 0.16 | 0.13 |
| chr13 | 73764302  | 73764620  | Tert          | ENSMUSG000000021611 | 12    | 0.18 | 0.08 | 0.1  | 0.27 | 0.06 | 0.06 |



|       |           |           |               |                    |      |      |      |      |      |      |      |
|-------|-----------|-----------|---------------|--------------------|------|------|------|------|------|------|------|
| chr13 | 47109559  | 47110315  | Nhirc1        | ENSMUSG00000044231 | 282  | 0.16 | 0.22 | 0.13 | 0.27 | 0.12 | 0.13 |
| chr13 | 55311366  | 55314112  | Nsd1          | ENSMUSG00000021488 | -697 | 0.18 | 0.14 | 0.14 | 0.33 | 0.16 | 0.17 |
| chr14 | 35315158  | 35316625  | Bmpr1a        | ENSMUSG00000021796 | -177 | 0.14 | 0.08 | 0.06 | 0.11 | 0.11 | 0.05 |
| chr14 | 118531881 | 118532130 | Tgds          | ENSMUSG00000022130 | -18  | 0.32 | 0.2  | 0.23 | 0.47 | 0.2  | 0.18 |
| chr14 | 13177252  | 13178880  | Fezf2         | ENSMUSG00000021743 | 313  | 0.26 | 0.13 | 0.29 | 0.41 | 0.15 | 0.16 |
| chr14 | 22804180  | 22807728  | Zfp503        | ENSMUSG00000039081 | 1130 | 0.24 | 0.2  | 0.31 | 0.36 | 0.21 | 0.23 |
| chr14 | 4518341   | 4519171   | Gm3164        | ENSMUSG00000091399 | 269  | 0.43 | 0.39 | 0.21 | 0.44 | NA   | 0.14 |
| chr15 | 54402846  | 54403178  | Mal2          | ENSMUSG00000024479 | 91   | 0.12 | 0.07 | 0.1  | 0.26 | 0.07 | 0.11 |
| chr16 | 35660095  | 35660750  | Sema5b        | ENSMUSG00000052133 | 901  | 0.27 | 0.23 | 0.56 | 0.81 | 0.39 | 0.62 |
| chr16 | 90934542  | 90935615  | 1110004E09Rik | ENSMUSG00000022972 | -327 | 0.35 | 0.32 | 0.1  | 0.21 | 0.17 | 0.11 |
| chr16 | 17891227  | 17892003  | Dgcr2         | ENSMUSG00000003166 | 71   | 0.29 | 0.35 | 0.1  | 0.31 | 0.2  | 0.12 |
| chr17 | 12934306  | 12935355  | Airn          | ENSMUSG00000078247 | 566  | 0.49 | 0.28 | 0.45 | 0.69 | 0.27 | 0.39 |
| chr17 | 35561733  | 35562805  | H2-Q6         | ENSMUSG00000073409 | 474  | 0.19 | 0.24 | 0.17 | 0.26 | 0.14 | 0.16 |
| chr17 | 24551361  | 24552098  | Rnps1         | ENSMUSG00000034681 | 109  | 0.12 | 0.12 | 0.17 | 0.33 | 0.15 | 0.14 |
| chr18 | 66097680  | 66098689  | Rax           | ENSMUSG00000024518 | 559  | 0.14 | 0.11 | 0.17 | 0.37 | 0.09 | 0.18 |
| chr18 | 80519177  | 80519961  | Gm16997       | ENSMUSG00000087218 | -505 | 0.11 | 0.07 | 0.15 | 0.24 | 0.07 | 0.13 |
| chr19 | 5117398   | 5118509   | Klc2          | ENSMUSG00000024862 | -367 | 0.45 | 0.15 | 0.12 | 0.26 | 0.16 | 0.11 |
| chr19 | 50752497  | 50753449  | Sorcs1        | ENSMUSG00000043531 | -15  | 0.27 | 0.14 | 0.13 | 0.3  | 0.14 | 0.14 |
| chr19 | 5741653   | 5742295   | Ltbp3         | ENSMUSG00000024940 | 1070 | 0.12 | 0.14 | 0.1  | 0.21 | 0.13 | 0.1  |
| chr19 | 17430842  | 17431254  | Gcnt1         | ENSMUSG00000038843 | 109  | 0.08 | 0.18 | 0.18 | 0.48 | 0.1  | 0.19 |
| chr2  | 178148098 | 178149407 | Ppp1r3d       | ENSMUSG00000049999 | 425  | 0.19 | 0.33 | 0.18 | 0.38 | 0.28 | 0.2  |
| chr2  | 147190633 | 147192131 | Pax1          | ENSMUSG00000037034 | 652  | 0.31 | 0.32 | 0.15 | 0.35 | 0.21 | 0.15 |
| chr2  | 25432541  | 25435428  | Gm996         | ENSMUSG00000091064 | 1433 | 0.27 | 0.2  | 0.19 | 0.37 | 0.24 | 0.23 |
| chr2  | 38209969  | 38210410  | Lhx2          | ENSMUSG00000000247 | 867  | 0.12 | 0.15 | 0.26 | 0.49 | 0.18 | 0.21 |
| chr2  | 119062753 | 119063968 | Spint1        | ENSMUSG00000027315 | 262  | 0.15 | 0.17 | 0.09 | 0.2  | 0.11 | 0.08 |
| chr3  | 127335404 | 127337421 | Neurog2       | ENSMUSG00000027967 | 358  | 0.12 | 0.25 | 0.18 | 0.27 | 0.17 | 0.15 |
| chr3  | 94167370  | 94168305  | C2cd4d        | ENSMUSG00000091648 | 1471 | 0.13 | 0.12 | 0.19 | 0.34 | 0.16 | 0.2  |
| chr3  | 45180620  | 45181239  | 2610316D01Rik | ENSMUSG00000086101 | 1253 | 0.09 | 0.04 | 0.1  | 0.21 | 0.08 | 0.09 |
| chr4  | 145722461 | 145723287 | Gm13241       | ENSMUSG00000073716 | -167 | 0.76 | 0.8  | 0.68 | 0.78 | 0.59 | 0.51 |
| chr4  | 109079288 | 109079938 | Ttc39a        | ENSMUSG00000028555 | -79  | 0.39 | 0.17 | 0.09 | 0.28 | 0.18 | 0.1  |

|      |           |           |               |                    |       |      |      |      |      |      |      |
|------|-----------|-----------|---------------|--------------------|-------|------|------|------|------|------|------|
| chr4 | 131604313 | 131605022 | Epb4.1        | ENSMUSG00000028906 | 326   | 0.1  | 0.13 | 0.08 | 0.16 | 0.15 | 0.07 |
| chr4 | 87677503  | 87679434  | Mllt3         | ENSMUSG00000028496 | 249   | 0.26 | 0.26 | 0.15 | 0.34 | 0.18 | 0.12 |
| chr4 | 155079070 | 155079883 | Ssu72         | ENSMUSG00000029038 | 243   | 0.34 | 0.4  | 0.1  | 0.3  | 0.28 | 0.13 |
| chr4 | 128782600 | 128782951 | Tmem54        | ENSMUSG00000028786 | -17   | 0.17 | 0.2  | 0.39 | 0.5  | 0.14 | 0.24 |
| chr4 | 106351244 | 106351646 | Ttc4          | ENSMUSG00000025413 | -154  | 0.3  | 0.34 | 0.17 | 0.38 | 0.16 | 0.1  |
| chr4 | 58924310  | 58925827  | Al314180      | ENSMUSG00000050812 | -294  | 0.15 | 0.19 | 0.09 | 0.19 | 0.14 | 0.11 |
| chr4 | 145364184 | 145364615 | Gm13243       | ENSMUSG00000081192 | -223  | 1    | 1    | 0.23 | 0.44 | NA   | 0.11 |
| chr5 | 28784318  | 28785746  | 9530036O11Rik | ENSMUSG00000086663 | 218   | 0.21 | 0.16 | 0.11 | 0.19 | 0.11 | 0.09 |
| chr5 | 58108478  | 58111739  | 4932441J04Rik | ENSMUSG00000085597 | -950  | 0.22 | 0.22 | 0.14 | 0.24 | 0.14 | 0.15 |
| chr5 | 86601452  | 86602059  | Uba6          | ENSMUSG00000035898 | -219  | 0.31 | 0.15 | 0.08 | 0.24 | 0.16 | 0.08 |
| chr5 | 119009680 | 119011467 | Med13l        | ENSMUSG00000018076 | -155  | 0.21 | 0.14 | 0.19 | 0.37 | 0.16 | 0.15 |
| chr5 | 24082663  | 24083391  | Abcf2         | ENSMUSG00000028953 | 190   | 0.12 | 0.11 | 0.16 | 0.34 | 0.07 | 0.21 |
| chr5 | 138704649 | 138705338 | BC037034      | ENSMUSG00000036948 | 225   | 0.25 | 0.26 | 0.11 | 0.32 | 0.31 | 0.12 |
| chr5 | 84845188  | 84845527  | Epha5         | ENSMUSG00000029245 | 474   | NA   | 0.2  | 0.19 | 0.41 | 0.17 | 0.12 |
| chr6 | 113256577 | 113257694 | Brpf1         | ENSMUSG0000001632  | -40   | 0.21 | 0.28 | 0.11 | 0.24 | 0.15 | 0.09 |
| chr6 | 67484857  | 67485654  | Tacstd2       | ENSMUSG00000051397 | 561   | 0.2  | 0.1  | 0.16 | 0.38 | 0.12 | 0.12 |
| chr6 | 83744929  | 83745388  | Nagk          | ENSMUSG00000034744 | 182   | 0.29 | 0.72 | 0.1  | 0.25 | 0.14 | 0.09 |
| chr6 | 52175255  | 52176312  | Hoxa9         | ENSMUSG00000038227 | 367   | 0.1  | 0.16 | 0.12 | 0.26 | 0.11 | 0.15 |
| chr6 | 148392495 | 148393244 | Tmtc1         | ENSMUSG00000030306 | 42    | 0.1  | 0.12 | 0.1  | 0.22 | 0.1  | 0.11 |
| chr7 | 64642150  | 64642594  | Gabrg3        | ENSMUSG00000055026 | -131  | 0.55 | 0.39 | 0.18 | 0.29 | 0.14 | 0.11 |
| chr7 | 37480331  | 37483719  | Tshz3         | ENSMUSG00000021217 | -1112 | 0.22 | 0.14 | 0.1  | 0.18 | 0.16 | 0.12 |
| chr7 | 148067555 | 148068325 | Sirt3         | ENSMUSG00000025486 | -172  | 0.38 | 0.21 | 0.15 | 0.33 | 0.22 | 0.09 |
| chr7 | 112892402 | 112893046 | Taf10         | ENSMUSG00000043866 | -128  | 0.13 | 0.15 | 0.26 | 0.28 | 0.07 | 0.1  |
| chr7 | 56891682  | 56892262  | Dbx1          | ENSMUSG00000030507 | 247   | 0.25 | 0.22 | 0.36 | 0.5  | 0.08 | 0.19 |
| chr7 | 108079266 | 108080885 | Arhgef17      | ENSMUSG00000032875 | 600   | 0.13 | 0.11 | 0.18 | 0.33 | 0.12 | 0.17 |
| chr7 | 88851426  | 88852089  | Homer2        | ENSMUSG00000025813 | 54    | 0.08 | 0.09 | 0.1  | 0.17 | 0.07 | 0.08 |
| chr7 | 16683573  | 16684371  | Napa          | ENSMUSG00000006024 | 165   | 0.09 | 0.27 | 0.12 | 0.29 | 0.13 | 0.1  |
| chr7 | 129008507 | 129008725 | Scnn1b        | ENSMUSG00000030873 | 25    | 0.13 | 0.21 | 0.24 | 0.45 | 0.15 | 0.17 |
| chr7 | 94394957  | 94395361  | Nox4          | ENSMUSG00000030562 | 0     | 0.1  | 0.18 | 0.13 | 0.27 | 0.11 | 0.1  |
| chr7 | 111650482 | 111650903 | Gm16464       | ENSMUSG00000082154 | -29   | NA   | NA   | 0.22 | 0.42 | NA   | 0.13 |

|       |           |           |               |                    |       |      |      |      |      |      |      |
|-------|-----------|-----------|---------------|--------------------|-------|------|------|------|------|------|------|
| chr8  | 113669124 | 113669910 | 9430091E24Rik | ENSMUSG00000084808 | -158  | 0.09 | 0.11 | 0.1  | 0.29 | 0.07 | 0.09 |
| chr9  | 55391802  | 55392080  | Isl2          | ENSMUSG00000032318 | 1798  | 0.24 | 0.05 | 0.25 | 0.41 | 0.04 | 0.1  |
| chr9  | 62991945  | 62994481  | Skor1         | ENSMUSG00000022245 | 1574  | 0.13 | 0.17 | 0.14 | 0.27 | 0.09 | 0.11 |
| chr9  | 66653628  | 66654032  | Ppp1r2-ps4    | ENSMUSG00000059237 | -85   | 0.25 | 0.32 | 0.24 | 0.34 | 0.06 | 0.13 |
| chr9  | 115218619 | 115220109 | Stt3b         | ENSMUSG00000032437 | 175   | 0.2  | 0.25 | 0.11 | 0.23 | 0.17 | 0.1  |
| chr9  | 103965058 | 103965507 | Uba5          | ENSMUSG00000032557 | 111   | 0.06 | 0.37 | 0.1  | 0.28 | 0.08 | 0.13 |
| chr9  | 108729404 | 108730333 | Celsr3        | ENSMUSG00000023473 | 1217  | 0.13 | 0.13 | 0.13 | 0.31 | 0.13 | 0.14 |
| chr4  | 145334915 | 145335752 | Gm13244       | ENSMUSG00000082334 | -316  | 0.33 | 0.34 | 0.32 | 0.58 | 0.05 | 0.11 |
| chr7  | 4945108   | 4946356   | Zfp579        | ENSMUSG00000051550 | 1210  | 0.93 | 0.92 | 0.75 | 0.82 | 0.61 | 0.44 |
| chr12 | 20421248  | 20422356  | Gm10479       | ENSMUSG00000073184 | 3     | 0.61 | 0.48 | 0.51 | 0.61 | 0.23 | 0.26 |
| chr4  | 145053444 | 145054340 | Smarca5-ps    | ENSMUSG00000052912 | -215  | 0.55 | 0.52 | 0.37 | 0.58 | 0.2  | 0.14 |
| chr12 | 18521016  | 18521850  | 5730507C01Rik | ENSMUSG00000073197 | -111  | 0.09 | 0.37 | 0.49 | 0.65 | 0.09 | 0.28 |
| chr15 | 80501861  | 80502569  | Fam83f        | ENSMUSG00000022408 | -62   | 0.25 | 0.38 | 0.51 | 0.59 | 0.15 | 0.23 |
| chr6  | 30907813  | 30909263  | Klf14         | ENSMUSG00000073209 | 452   | 0.19 | 0.26 | 0.25 | 0.47 | 0.13 | 0.14 |
| chr6  | 148303076 | 148304060 | Rps4y2        | ENSMUSG00000063171 | 390   | 0.68 | 0.8  | 0.7  | 0.85 | 0.4  | 0.4  |
| chr4  | 146034485 | 146035326 | Gm13034       | ENSMUSG00000082195 | -20   | 0.63 | 0.69 | 0.38 | 0.69 | 0.28 | 0.25 |
| chr5  | 144014681 | 144016934 | Zfp316        | ENSMUSG00000046658 | 1108  | 0.69 | 0.63 | 0.56 | 0.7  | 0.26 | 0.24 |
| chr12 | 19393396  | 19394249  | Gm5784        | ENSMUSG00000073187 | 157   | 0.53 | 0.72 | 0.34 | 0.58 | 0.1  | 0.14 |
| chr11 | 58948024  | 58949860  | Obscn         | ENSMUSG00000061462 | 935   | 0.16 | 0.18 | 0.44 | 0.69 | 0.1  | 0.18 |
| chr12 | 22990377  | 22991277  | 2410018L13Rik | ENSMUSG00000073164 | 171   | NA   | NA   | 0.4  | 0.53 | NA   | 0.18 |
| chr16 | 18590535  | 18590816  | 4930588K23Rik | ENSMUSG00000075335 | -1410 | 0.24 | 0.23 | 0.4  | 0.57 | 0.21 | 0.18 |
| chr19 | 59243605  | 59244971  | Vax1          | ENSMUSG00000006270 | 230   | 0.3  | 0.16 | 0.29 | 0.54 | 0.11 | 0.13 |
| chr7  | 15207674  | 15208941  | Vmn1r90       | ENSMUSG00000041596 | -480  | 0.18 | 0.12 | 0.4  | 0.6  | 0.1  | 0.19 |
| chr17 | 27639624  | 27639943  | Grm4          | ENSMUSG00000063239 | 466   | 0.84 | 0.95 | 0.8  | 0.8  | 0.6  | 0.36 |
| chr8  | 89993991  | 89994981  | Cbln1         | ENSMUSG00000090275 | 481   | 0.85 | 0.91 | 0.64 | 0.59 | 0.16 | 0.13 |
| chr12 | 24319033  | 24319840  | Gm20474       | ENSMUSG00000091973 | -96   | 0.52 | 0.38 | 0.61 | 0.74 | 0.12 | 0.4  |
| chr12 | 22086328  | 22087057  | Gm9282        | ENSMUSG00000092226 | 136   | 0.23 | 0.3  | 0.38 | 0.56 | 0.1  | 0.22 |
| chr12 | 86518133  | 86518482  | Pgf           | ENSMUSG00000004791 | -61   | 0.08 | 0.27 | 0.32 | 0.63 | 0.05 | 0.17 |
| chr4  | 145230187 | 145231200 | Gm13231       | ENSMUSG00000081885 | -567  | 0.58 | 0.57 | 0.44 | 0.73 | 0.33 | 0.32 |
| chr12 | 18394007  | 18394852  | Gm9590        | ENSMUSG00000091781 | -132  | 0.72 | 0.65 | 0.44 | 0.71 | 0.3  | 0.29 |

|       |           |           |               |                    |       |      |      |      |      |      |      |
|-------|-----------|-----------|---------------|--------------------|-------|------|------|------|------|------|------|
| chr2  | 119569561 | 119570178 | ltpka         | ENSMUSG00000027296 | 1796  | 0.63 | 0.63 | 0.52 | 0.77 | 0.25 | 0.41 |
| chr4  | 147112575 | 147113263 | Gm13136       | ENSMUSG00000081179 | -384  | 0.64 | 0.54 | 0.32 | 0.64 | 0.19 | 0.23 |
| chr8  | 4206443   | 4206677   | 4932443L11Rik | ENSMUSG00000086805 | -273  | 0.87 | 0.84 | 0.54 | 0.84 | 0.38 | 0.46 |
| chr13 | 65360392  | 65360809  | Gm10775       | ENSMUSG00000074847 | -247  | 0.31 | 0.79 | 0.52 | 0.72 | 0.4  | 0.36 |
| chr4  | 132807271 | 132807492 | Map3k6        | ENSMUSG00000028862 | 617   | 0.51 | 0.7  | 0.47 | 0.58 | 0.16 | 0.24 |
| chr4  | 146817148 | 146817570 | Gm13161       | ENSMUSG00000082248 | -221  | 0.27 | 0.22 | 0.25 | 0.49 | 0.11 | 0.14 |
| chr13 | 47106222  | 47106465  | 2010001K21Rik | ENSMUSG00000051606 | 301   | 0.92 | 0.37 | 0.77 | 0.95 | 0.38 | 0.56 |
| chr1  | 156051967 | 156052668 | Zfp648        | ENSMUSG00000066797 | 1090  | 0.55 | 0.38 | 0.3  | 0.5  | 0.25 | 0.14 |
| chr1  | 137481284 | 137481931 | Gm4793        | ENSMUSG00000054412 | 257   | 0.06 | 0.17 | 0.51 | 0.77 | 0.16 | 0.22 |
| chr1  | 90101904  | 90102374  | Dnajb3        | ENSMUSG00000081984 | 184   | 0.08 | 0.16 | 0.14 | 0.41 | 0.1  | 0.08 |
| chr11 | 31271323  | 31271818  | Stc2          | ENSMUSG00000020303 | -1496 | 0.11 | 0.13 | 0.34 | 0.54 | 0.33 | 0.17 |
| chr11 | 4537624   | 4537922   | Ascc2         | ENSMUSG00000020412 | 23    | 0.23 | 0.18 | 0.1  | 0.49 | 0.14 | 0.15 |
| chr12 | 17999394  | 18000496  | Gm4983        | ENSMUSG00000091687 | 6     | 0.27 | 0.19 | 0.23 | 0.51 | 0.09 | 0.17 |
| chr12 | 24936801  | 24937596  | Gm9312        | ENSMUSG00000092064 | -152  | 0.82 | 1    | 0.33 | 0.64 | 1    | 0.22 |
| chr12 | 20996063  | 20997166  | Asap2         | ENSMUSG00000052632 | 294   | 0.39 | 0.62 | 0.26 | 0.58 | 0.32 | 0.21 |
| chr12 | 21834163  | 21835020  | Gm17680       | ENSMUSG00000073183 | 156   | 1    | 0.82 | 0.41 | 0.65 | 0.35 | 0.29 |
| chr12 | 24653152  | 24654271  | Gm17330       | ENSMUSG00000091196 | -1    | NA   | 0.4  | 0.32 | 0.55 | 1    | 0.13 |
| chr17 | 55584778  | 55585416  | St6gal2       | ENSMUSG00000024172 | 249   | 0.75 | 0.24 | 0.19 | 0.56 | 0.12 | 0.15 |
| chr18 | 46625207  | 46625511  | Mospd4        | ENSMUSG00000046487 | 111   | 0.15 | 0.3  | 0.43 | 0.61 | 0.25 | 0.27 |
| chr19 | 10630204  | 10630531  | Tmem216       | ENSMUSG00000024667 | -141  | 0.21 | 0.63 | 0.19 | 0.63 | 0.25 | 0.21 |
| chr2  | 9798914   | 9799312   | Gm13256       | ENSMUSG00000086618 | 230   | 0.17 | 0.13 | 0.47 | 0.57 | 0.29 | 0.17 |
| chr2  | 79268788  | 79269068  | Cerkl         | ENSMUSG00000075256 | 120   | 0.14 | 0.16 | 0.36 | 0.6  | 0.16 | 0.24 |
| chr4  | 146315836 | 146316755 | Gm13140       | ENSMUSG00000083027 | -290  | 1    | 0.81 | 0.65 | 0.84 | 0.62 | 0.51 |
| chr4  | 122999661 | 123000858 | Oxct2a        | ENSMUSG00000076436 | 618   | 0.72 | 0.37 | 0.26 | 0.76 | 0.42 | 0.31 |
| chr4  | 122793502 | 122794699 | Oxct2b        | ENSMUSG00000076438 | 593   | 0.6  | 0.5  | 0.46 | 0.85 | 0.34 | 0.29 |
| chr4  | 145617306 | 145618144 | Gm13233       | ENSMUSG00000083038 | -315  | 0.43 | 0.45 | 0.49 | 0.65 | 0.23 | 0.3  |
| chr4  | 136157960 | 136158821 | Kdm1a         | ENSMUSG00000036940 | -167  | 0.74 | 0.54 | 0.2  | 0.57 | 0.58 | 0.16 |
| chr6  | 122289272 | 122289655 | Phc1          | ENSMUSG00000040669 | 167   | 0.17 | 0.62 | 0.14 | 0.49 | 0.18 | 0.11 |
| chr8  | 95379169  | 95379542  | Lpcat2        | ENSMUSG00000033192 | 106   | 0.05 | 0.06 | 0.14 | 0.5  | 0.08 | 0.16 |
| chr9  | 20843062  | 20843270  | Gm17470       | ENSMUSG00000091919 | -940  | 0.43 | 0.56 | 0.27 | 0.55 | 0.28 | 0.21 |

|       |           |           |               |                    |       |      |      |      |      |      |      |
|-------|-----------|-----------|---------------|--------------------|-------|------|------|------|------|------|------|
| chr5  | 53658219  | 53658645  | 1810013D10Rik | ENSMUSG00000061461 | 87    | 0.28 | 0.35 | 0.4  | 0.81 | 0.12 | 0.16 |
| chr12 | 85912163  | 85912686  | Vsx2          | ENSMUSG00000021239 | 1634  | 0.11 | 0.1  | 0.62 | 0.88 | 0.11 | 0.23 |
| chr17 | 25359420  | 25359694  | Unkl          | ENSMUSG00000015127 | 73    | 0.5  | 1    | 0.62 | 0.83 | 0.5  | 0.22 |
| chr2  | 120229624 | 120229995 | Ganc          | ENSMUSG00000062646 | 177   | 0.25 | 0.28 | 0.41 | 0.92 | 0.38 | 0.1  |
| chr9  | 78023692  | 78023940  | C920006O11Rik | ENSMUSG00000087566 | 95    | NA   | 1    | 0.21 | 1    | NA   | 0.14 |
| chr17 | 56650721  | 56651890  | Znrf4         | ENSMUSG00000044526 | 601   | 0.42 | 0.71 | 0.31 | 0.31 | 0.44 | 0.51 |
| chr11 | 102298687 | 102300192 | Fam171a2      | ENSMUSG00000034685 | 1652  | 0.21 | 0.13 | 0.16 | 0.2  | 0.16 | 0.31 |
| chr11 | 97361451  | 97362293  | 4933428G20Rik | ENSMUSG00000047988 | -218  | 0.18 | 0.17 | 0.14 | 0.26 | 0.17 | 0.43 |
| chr19 | 6184250   | 6184665   | 1700123I01Rik | ENSMUSG00000024786 | 69    | 0.88 | 0.92 | 0.63 | 0.63 | 0.76 | 0.91 |
| chr19 | 6427827   | 6428991   | Nrxn2         | ENSMUSG00000033768 | 486   | 0.13 | 0.09 | 0.19 | 0.36 | 0.13 | 0.48 |
| chr4  | 131476114 | 131478267 | Tmem200b      | ENSMUSG00000070720 | -496  | 0.21 | 0.18 | 0.12 | 0.16 | 0.13 | 0.23 |
| chr5  | 124573533 | 124573744 | Pitpnm2       | ENSMUSG00000029406 | 925   | 0.42 | 0.58 | 0.59 | 0.55 | 0.81 | 0.86 |
| chr5  | 136209452 | 136210477 | Por           | ENSMUSG00000005514 | 913   | 0.85 | 0.9  | 0.79 | 0.75 | 0.98 | 0.97 |
| chr5  | 132092267 | 132092618 | Auts2         | ENSMUSG00000029673 | 33    | 0.17 | 0.1  | 0.19 | 0.25 | 0.1  | 0.48 |
| chr5  | 135825721 | 135826025 | Fkbp6         | ENSMUSG00000040013 | -128  | 0.88 | 0.86 | 0.64 | 0.61 | 0.89 | 0.92 |
| chr7  | 26099726  | 26101031  | Megf8         | ENSMUSG00000045039 | -1805 | 0.08 | 0.1  | 0.14 | 0.19 | 0.11 | 0.33 |
| chr8  | 87230619  | 87230958  | Nfix          | ENSMUSG0000001911  | 827   | 0.15 | 0.15 | 0.29 | 0.37 | 0.18 | 0.61 |
| chr9  | 14555262  | 14556715  | Fut4          | ENSMUSG00000049307 | 578   | 0.6  | 0.63 | 0.18 | 0.21 | 0.71 | 0.43 |
| chr11 | 95691801  | 95692672  | Phospho1      | ENSMUSG00000050860 | 159   | 0.25 | 0.17 | 0.18 | 0.34 | 0.17 | 0.65 |
| chr15 | 99256199  | 99256481  | Nckap5l       | ENSMUSG00000023009 | -1372 | 0.83 | 0.71 | 0.51 | 0.65 | 0.82 | 0.86 |
| chr4  | 48064484  | 48065050  | Nr4a3         | ENSMUSG00000028341 | 647   | 0.25 | 0.34 | 0.2  | 0.29 | 0.36 | 0.54 |
| chr7  | 51807356  | 51807769  | Nr1h2         | ENSMUSG00000060601 | -321  | 0.69 | 0.63 | 0.37 | 0.43 | 0.61 | 0.74 |
| chr10 | 93498084  | 93499304  | Vezt          | ENSMUSG00000036099 | -282  | 0.09 | 0.14 | 0.15 | 0.08 | 0.16 | 0.22 |
| chr14 | 55172742  | 55173279  | Haus4         | ENSMUSG00000022177 | 188   | 0.25 | 0.14 | 0.17 | 0.12 | 0.17 | 0.24 |
| chr14 | 52639326  | 52640008  | Zfp219        | ENSMUSG00000049295 | 709   | 0.08 | 0.18 | 0.13 | 0.1  | 0.1  | 0.24 |
| chr3  | 95363448  | 95363650  | Hormad1       | ENSMUSG00000028109 | -50   | 0.94 | 0.94 | 0.72 | 0.67 | 0.76 | 0.94 |
| chr9  | 44061344  | 44061546  | Pdzd3         | ENSMUSG00000032105 | -1898 | 0.3  | 0.21 | 0.34 | 0.29 | 0.71 | 0.75 |
| chr10 | 79634543  | 79634777  | Cirbp         | ENSMUSG00000045193 | -67   | 0.18 | 0.1  | 0.25 | 0.26 | 0.78 | 0.74 |
| chr4  | 107356149 | 107356597 | Dmrtb1        | ENSMUSG00000028610 | -188  | 0.48 | 0.58 | 0.51 | 0.53 | 0.76 | 0.91 |
| chr1  | 138112393 | 138112693 | Gm17643       | ENSMUSG00000091279 | -108  | 0.32 | 0.74 | 0.34 | 0.45 | 0.82 | 0.89 |

|       |           |           |               |                    |       |      |      |      |      |      |      |
|-------|-----------|-----------|---------------|--------------------|-------|------|------|------|------|------|------|
| chr1  | 155755045 | 155755289 | Glul          | ENSMUSG00000026473 | 1994  | 0.95 | 0.93 | 0.52 | 0.44 | 0.88 | 0.86 |
| chr10 | 79844305  | 79845310  | Mex3d         | ENSMUSG00000048696 | -75   | 0.77 | 0.66 | 0.56 | 0.44 | 0.91 | 0.98 |
| chr11 | 5616861   | 5617204   | Mrps24        | ENSMUSG00000020477 | -1349 | 0.7  | 0.88 | 0.56 | 0.52 | 0.94 | 0.9  |
| chr11 | 75328874  | 75329093  | Scarf1        | ENSMUSG00000038188 | 1906  | 0.93 | 0.97 | 0.55 | 0.6  | 0.94 | 0.97 |
| chr13 | 112545473 | 112545709 | Map3k1        | ENSMUSG00000021754 | -679  | 0.99 | 0.99 | 0.51 | 0.39 | 0.95 | 0.96 |
| chr17 | 28212974  | 28213327  | 4930526A20Rik | ENSMUSG00000085521 | 150   | 0.77 | 0.91 | 0.27 | 0.3  | 0.72 | 0.65 |
| chr19 | 7495770   | 7496020   | 2700081O15Rik | ENSMUSG00000053080 | 377   | 0.38 | 0.37 | 0.18 | 0.21 | 0.22 | 0.63 |
| chr19 | 6320208   | 6320809   | Cdc42bpg      | ENSMUSG00000024769 | -1300 | 0.68 | 0.78 | 0.39 | 0.37 | 0.82 | 0.74 |
| chr2  | 152460186 | 152460419 | Rem1          | ENSMUSG00000000359 | 1599  | 0.82 | 0.47 | 0.23 | 0.15 | 0.62 | 0.67 |
| chr2  | 38527606  | 38527913  | Gm13587       | ENSMUSG00000087062 | -298  | 0.62 | 0.78 | 0.37 | 0.23 | 0.83 | 0.81 |
| chr2  | 155767579 | 155768067 | Gm15557       | ENSMUSG00000078972 | 1359  | 0.5  | 0.56 | 0.15 | 0.17 | 0.74 | 0.67 |
| chr2  | 158521648 | 158521940 | Ppp1r16b      | ENSMUSG00000037754 | -77   | 0.97 | 0.87 | 0.42 | 0.51 | 0.9  | 0.93 |
| chr3  | 88972633  | 88972835  | Clk2          | ENSMUSG00000068917 | 1648  | 0.82 | 0.84 | 0.37 | 0.48 | 0.92 | 0.93 |
| chr3  | 108742960 | 108743361 | 4921515J06Rik | ENSMUSG00000045662 | 158   | NA   | 0.33 | 0.19 | 0.13 | 0.41 | 0.62 |
| chr5  | 115199284 | 115199602 | Git2          | ENSMUSG00000041890 | -1165 | 0.81 | 0.65 | 0.28 | 0.32 | 0.72 | 0.7  |
| chr5  | 136750732 | 136751267 | Gm16599       | ENSMUSG00000086220 | 133   | 0.88 | 0.87 | 0.33 | 0.33 | 0.85 | 0.89 |
| chr6  | 29009954  | 29010170  | Lep           | ENSMUSG00000059201 | -158  | 0.28 | 0.32 | 0.18 | 0.24 | 0.5  | 0.62 |
| chr9  | 107501120 | 107501482 | BY080835      | ENSMUSG00000070285 | -1895 | 0.88 | 0.86 | 0.33 | 0.33 | 0.86 | 0.85 |
| chr9  | 107346313 | 107346582 | Gm17118       | ENSMUSG00000091425 | 915   | 1    | 0.56 | 0.37 | 0.38 | 1    | 0.93 |
| chr3  | 88447906  | 88448126  | Arhgef2       | ENSMUSG00000028059 | 162   | 0.53 | 0.39 | 0.23 | 0.35 | 0.97 | 0.84 |
| chr4  | 116821471 | 116821684 | Gm13015       | ENSMUSG00000070834 | 49    | 0.27 | 0.35 | 0.41 | 0.27 | 0.78 | 0.73 |
| chr10 | 80785283  | 80785521  | 2510012J08Rik | ENSMUSG00000034889 | 1554  | 0.31 | 0.62 | 0.56 | 0.41 | 0.75 | 0.8  |
| chr9  | 110532506 | 110532846 | Nbeal2        | ENSMUSG00000056724 | -504  | 0.86 | 0.86 | 0.71 | 0.52 | 0.94 | 0.86 |
| chr9  | 44248695  | 44249088  | Foxr1         | ENSMUSG00000074397 | 60    | 0.77 | 0.79 | 0.56 | 0.45 | 0.84 | 0.86 |
| chr9  | 107473150 | 107473423 | Hyal2         | ENSMUSG00000010047 | 1838  | NA   | NA   | 0.62 | 0.48 | NA   | 0.98 |
| chr14 | 8147038   | 8147607   | Gm3739        | ENSMUSG00000091472 | 241   | NA   | 1    | 0.11 | 0.07 | NA   | 1    |
| chr6  | 149302176 | 149302396 | Gm15782       | ENSMUSG00000084083 | 62    | 1    | 1    | 0.32 | 0.29 | 0.61 | 0.98 |
| chr16 | 9992345   | 9992570   | Grin2a        | ENSMUSG00000059003 | 169   | 0.56 | 0.33 | 0.78 | 0.56 | 0.44 | 0.54 |
| chr11 | 98190858  | 98191070  | Neurod2       | ENSMUSG00000038255 | -2    | 1    | NA   | 0.56 | NA   | 0.11 | 0.2  |
| chr17 | 26978069  | 26978447  | Nkx2-5        | ENSMUSG00000015579 | 252   | 0.34 | 0.12 | 0.48 | 0.45 | 0.17 | 0.11 |

|       |           |           |               |                     |       |      |      |      |      |      |      |
|-------|-----------|-----------|---------------|---------------------|-------|------|------|------|------|------|------|
| chr2  | 155455074 | 155455437 | Myh7b         | ENSMUSG00000074652  | 459   | NA   | NA   | 0.39 | 0.26 | NA   | 0.06 |
| chr6  | 29685416  | 29686541  | Smo           | ENSMUSG00000001761  | 284   | 0.21 | 0.19 | 0.68 | 0.14 | 0.11 | 0.13 |
| chr17 | 13896933  | 13898717  | Gm16052       | ENSMUSG000000086292 | -833  | 0.13 | 0.19 | 0.08 | 0.13 | 0.09 | 0.15 |
| chr15 | 88898011  | 88899044  | Panx2         | ENSMUSG000000058441 | -1576 | 0.79 | 0.91 | 0.48 | 0.66 | 0.5  | 0.69 |
| chr2  | 37648625  | 37649392  | Crb2          | ENSMUSG000000035403 | -1681 | 0.85 | 0.87 | 0.34 | 0.42 | 0.49 | 0.48 |
| chr4  | 149422722 | 149423191 | Gm13067       | ENSMUSG000000086665 | -166  | 0.31 | 0.67 | 0.15 | 0.19 | 0.14 | 0.28 |
| chr17 | 35972302  | 35972656  | Tubb5         | ENSMUSG00000001525  | 1526  | 0.4  | 0.14 | 0.23 | 0.32 | 0.55 | 0.55 |
| chr1  | 88421402  | 88425154  | Ptma          | ENSMUSG000000026238 | -33   | 0.11 | 0.15 | 0.11 | 0.16 | 0.17 | 0.17 |
| chr1  | 89652441  | 89653237  | Atg16l1       | ENSMUSG000000026289 | 394   | 0.06 | 0.15 | 0.1  | 0.14 | 0.13 | 0.18 |
| chr1  | 60155000  | 60155621  | Carf          | ENSMUSG000000026017 | 219   | 0.06 | 0.11 | 0.05 | 0.18 | 0.03 | 0.19 |
| chr1  | 59969392  | 59970734  | Fam117b       | ENSMUSG000000041040 | 213   | 0.15 | 0.09 | 0.08 | 0.16 | 0.1  | 0.22 |
| chr1  | 162836340 | 162837227 | Rc3h1         | ENSMUSG000000040423 | 234   | 0.14 | 0.16 | 0.08 | 0.14 | 0.1  | 0.21 |
| chr1  | 192802127 | 192803330 | Vash2         | ENSMUSG000000037568 | 149   | 0.12 | 0.12 | 0.08 | 0.23 | 0.1  | 0.21 |
| chr1  | 75356930  | 75357545  | Des           | ENSMUSG000000026208 | 333   | 0.14 | 0.11 | 0.12 | 0.21 | 0.19 | 0.25 |
| chr1  | 75371800  | 75372361  | Speg          | ENSMUSG000000026207 | 208   | 0.2  | 0.25 | 0.27 | 0.37 | 0.18 | 0.55 |
| chr1  | 75418563  | 75420015  | Speg          | ENSMUSG000000026207 | -796  | 0.1  | 0.18 | 0.14 | 0.17 | 0.1  | 0.25 |
| chr10 | 79439528  | 79440516  | ORF61         | ENSMUSG000000013858 | 1496  | 0.89 | 0.9  | 0.6  | 0.67 | 0.73 | 0.74 |
| chr10 | 121078644 | 121079141 | D930020B18Rik | ENSMUSG000000047642 | 248   | 0.23 | 0.17 | 0.08 | 0.17 | 0.13 | 0.21 |
| chr10 | 126415466 | 126417218 | Ctdsp2        | ENSMUSG000000078429 | 569   | 0.17 | 0.18 | 0.11 | 0.16 | 0.13 | 0.21 |
| chr10 | 12683814  | 12684493  | Stx11         | ENSMUSG000000039232 | -88   | 0.09 | 0.08 | 0.07 | 0.18 | 0.14 | 0.25 |
| chr10 | 127520303 | 127521046 | Atp5b         | ENSMUSG000000025393 | 345   | 0.06 | 0.09 | 0.08 | 0.15 | 0.09 | 0.22 |
| chr10 | 79782877  | 79783359  | 2310011J03Rik | ENSMUSG000000020133 | 164   | NA   | NA   | 0.1  | 0.3  | 0.47 | 0.35 |
| chr11 | 74978809  | 74982829  | Hic1          | ENSMUSG000000043099 | 829   | 0.2  | 0.21 | 0.29 | 0.36 | 0.14 | 0.38 |
| chr11 | 120048582 | 120049034 | 2810410L24Rik | ENSMUSG000000075389 | 1257  | 0.14 | 0.16 | 0.11 | 0.24 | 0.29 | 0.27 |
| chr11 | 77978482  | 77979367  | Traf4         | ENSMUSG000000017386 | 94    | 0.15 | 0.08 | 0.07 | 0.1  | 0.07 | 0.21 |
| chr11 | 97489569  | 97491279  | E130012A19Rik | ENSMUSG000000043439 | 606   | 0.19 | 0.16 | 0.09 | 0.13 | 0.14 | 0.15 |
| chr11 | 119408206 | 119411046 | Nptx1         | ENSMUSG000000025582 | -559  | 0.19 | 0.18 | 0.08 | 0.14 | 0.23 | 0.15 |
| chr12 | 112088284 | 112088936 | Zfp839        | ENSMUSG000000021271 | 121   | 0.25 | 0.16 | 0.11 | 0.16 | 0.11 | 0.22 |
| chr12 | 70297780  | 70299262  | 1110034A24Rik | ENSMUSG000000020973 | -432  | 0.15 | 0.17 | 0.09 | 0.15 | 0.08 | 0.16 |
| chr12 | 4848016   | 4848493   | Fkbp1b        | ENSMUSG000000020635 | 147   | 0.16 | 0.11 | 0.08 | 0.12 | 0.07 | 0.24 |

|       |           |           |               |                    |      |      |      |      |      |      |      |
|-------|-----------|-----------|---------------|--------------------|------|------|------|------|------|------|------|
| chr12 | 66176461  | 66176962  | Fancm         | ENSMUSG00000055884 | 118  | 0.09 | 0.11 | 0.06 | 0.16 | 0.05 | 0.16 |
| chr12 | 40948799  | 40950110  | Gm7008        | ENSMUSG00000035983 | 109  | 0.22 | 0.2  | 0.07 | 0.14 | 0.2  | 0.17 |
| chr12 | 114166611 | 114168153 | Jag2          | ENSMUSG00000002799 | 324  | 0.07 | 0.1  | 0.07 | 0.11 | 0.07 | 0.14 |
| chr13 | 69672302  | 69674070  | Nsun2         | ENSMUSG00000021595 | 562  | 0.16 | 0.19 | 0.08 | 0.17 | 0.13 | 0.14 |
| chr13 | 64253711  | 64254862  | Zfp367        | ENSMUSG00000044934 | -549 | 0.12 | 0.13 | 0.09 | 0.12 | 0.09 | 0.17 |
| chr13 | 78334137  | 78334834  | Nr2f1         | ENSMUSG00000069171 | 1149 | 0.2  | 0.14 | 0.1  | 0.15 | 0.17 | 0.23 |
| chr14 | 118633686 | 118636443 | Sox21         | ENSMUSG00000061517 | 246  | 0.16 | 0.13 | 0.1  | 0.14 | 0.12 | 0.17 |
| chr14 | 70953879  | 70954936  | Hr            | ENSMUSG00000022096 | 544  | 0.18 | 0.21 | 0.09 | 0.15 | 0.12 | 0.2  |
| chr14 | 26513489  | 26513898  | Ppif          | ENSMUSG00000021868 | 53   | 0.06 | 0.11 | 0.05 | 0.13 | 0.09 | 0.15 |
| chr15 | 100252907 | 100253949 | Slc11a2       | ENSMUSG00000023030 | -28  | 0.11 | 0.2  | 0.09 | 0.15 | 0.35 | 0.19 |
| chr15 | 58654258  | 58655652  | Tmem65        | ENSMUSG00000062373 | 130  | 0.34 | 0.11 | 0.09 | 0.11 | 0.12 | 0.21 |
| chr15 | 101004071 | 101005078 | Acvr1b        | ENSMUSG0000000532  | 18   | 0.14 | 0.1  | 0.08 | 0.14 | 0.07 | 0.17 |
| chr15 | 39774763  | 39775910  | Lrp12         | ENSMUSG00000022305 | -84  | 0.26 | 0.21 | 0.09 | 0.14 | 0.11 | 0.18 |
| chr15 | 102033871 | 102034642 | Zfp740        | ENSMUSG00000046897 | 177  | 0.15 | 0.09 | 0.08 | 0.15 | 0.07 | 0.17 |
| chr15 | 100408678 | 100408932 | Pou6f1        | ENSMUSG00000009739 | 1857 | 0.8  | 0.73 | 0.58 | 0.64 | 0.81 | 0.87 |
| chr16 | 17131674  | 17132699  | Sdf2l1        | ENSMUSG00000022769 | 290  | 0.3  | 0.16 | 0.09 | 0.2  | 0.32 | 0.23 |
| chr16 | 44139763  | 44140601  | Atp6v1a       | ENSMUSG00000052459 | -364 | 0.14 | 0.24 | 0.09 | 0.14 | 0.13 | 0.17 |
| chr16 | 96212227  | 96212715  | Psmg1         | ENSMUSG00000022913 | 26   | 0.12 | 0.32 | 0.08 | 0.17 | 0.12 | 0.28 |
| chr17 | 5342099   | 5342310   | Arid1b        | ENSMUSG00000069729 | 490  | 0.79 | 0.79 | 0.68 | 0.75 | 0.93 | 0.93 |
| chr17 | 48060669  | 48061637  | Foxp4         | ENSMUSG00000023991 | 196  | 0.23 | 0.14 | 0.07 | 0.13 | 0.07 | 0.16 |
| chr17 | 26852346  | 26853324  | A930001N09Rik | ENSMUSG00000048249 | 240  | 0.19 | 0.38 | 0.12 | 0.15 | 0.38 | 0.26 |
| chr17 | 33896832  | 33897323  | Gm17251       | ENSMUSG00000090952 | 140  | 0.17 | NA   | 0.11 | 0.32 | 0.46 | 0.36 |
| chr17 | 28313878  | 28314610  | Zfp523        | ENSMUSG00000024220 | 92   | 0.15 | 0.15 | 0.08 | 0.16 | 0.08 | 0.19 |
| chr17 | 34401422  | 34402041  | H2-Ab1        | ENSMUSG00000073421 | 1546 | 0.12 | 0.08 | 0.07 | 0.13 | 0.07 | 0.14 |
| chr17 | 28278533  | 28279768  | Scube3        | ENSMUSG00000038677 | -111 | 0.18 | 0.18 | 0.07 | 0.14 | 0.11 | 0.17 |
| chr17 | 23700739  | 23701256  | Zfp213        | ENSMUSG00000071256 | 196  | 0.14 | 0.18 | 0.11 | 0.13 | 0.25 | 0.25 |
| chr17 | 34161296  | 34162323  | Ring1         | ENSMUSG00000024325 | -212 | 0.08 | 0.15 | 0.08 | 0.18 | 0.12 | 0.16 |
| chr17 | 45732259  | 45732899  | Slc29a1       | ENSMUSG00000023942 | -128 | 0.19 | 0.1  | 0.12 | 0.16 | 0.13 | 0.27 |
| chr17 | 57161969  | 57162183  | Khsrp         | ENSMUSG00000007670 | 1416 | 0.48 | 0.55 | 0.2  | 0.39 | 0.4  | 0.42 |
| chr17 | 80460520  | 80461977  | Hnrpl         | ENSMUSG00000024095 | 76   | 0.17 | 0.15 | 0.1  | 0.2  | 0.19 | 0.21 |



|       |           |           |               |                    |      |      |      |      |      |      |      |
|-------|-----------|-----------|---------------|--------------------|------|------|------|------|------|------|------|
| chr18 | 42554012  | 42555571  | Pou4f3        | ENSMUSG00000024497 | 598  | 0.16 | 0.15 | 0.11 | 0.18 | 0.08 | 0.21 |
| chr18 | 42670714  | 42671945  | Tcerg1        | ENSMUSG00000024498 | 188  | 0.32 | 0.24 | 0.11 | 0.17 | 0.14 | 0.23 |
| chr19 | 46210307  | 46211672  | Pitx3         | ENSMUSG00000025229 | 790  | 0.14 | 0.15 | 0.09 | 0.15 | 0.12 | 0.19 |
| chr2  | 28368482  | 28369303  | Ralgds        | ENSMUSG00000026821 | 247  | 0.19 | 0.13 | 0.07 | 0.12 | 0.09 | 0.13 |
| chr2  | 164823028 | 164823794 | Slc12a5       | ENSMUSG00000017740 | 1320 | 0.25 | 0.19 | 0.19 | 0.26 | 0.1  | 0.42 |
| chr2  | 155937149 | 155937748 | Cpne1         | ENSMUSG00000074643 | 151  | 0.27 | 0.16 | 0.09 | 0.12 | 0.13 | 0.24 |
| chr2  | 130866780 | 130867488 | Gfra4         | ENSMUSG00000027316 | 16   | 0.09 | 0.09 | 0.07 | 0.12 | 0.05 | 0.16 |
| chr2  | 32127339  | 32127641  | Gm13611       | ENSMUSG00000066068 | 125  | 0.79 | 0.88 | 0.56 | 0.71 | 0.87 | 0.87 |
| chr2  | 127307845 | 127308460 | Kcnip3        | ENSMUSG00000079056 | 83   | 0.41 | 0.32 | 0.12 | 0.21 | 0.55 | 0.33 |
| chr2  | 149656129 | 149657030 | Tmem90b       | ENSMUSG00000074736 | 55   | 0.17 | 0.15 | 0.09 | 0.2  | 0.12 | 0.22 |
| chr2  | 168751827 | 168752206 | Zfp64         | ENSMUSG00000027551 | 364  | 0.51 | 0.33 | 0.24 | 0.36 | 0.43 | 0.53 |
| chr2  | 130986664 | 130986306 | 1700037H04Rik | ENSMUSG00000027327 | -229 | 0.25 | 0.07 | 0.08 | 0.11 | 0.06 | 0.35 |
| chr2  | 164286302 | 164287192 | Gm14302       | ENSMUSG00000085760 | -292 | 0.09 | 0.12 | 0.1  | 0.14 | 0.1  | 0.21 |
| chr2  | 28766826  | 28767071  | Barhl1        | ENSMUSG00000026805 | 1067 | 0.28 | 0.18 | 0.13 | 0.29 | 0.17 | 0.42 |
| chr2  | 180317299 | 180317747 | 1600027N09Rik | ENSMUSG00000027569 | 106  | 0.1  | 0.16 | 0.06 | 0.1  | 0.08 | 0.18 |
| chr2  | 84510346  | 84510948  | 2700094K13Rik | ENSMUSG00000076437 | 186  | 0.3  | NA   | 0.07 | 0.2  | 0.4  | 0.29 |
| chr2  | 101518660 | 101518931 | Traf6         | ENSMUSG00000027164 | 198  | 0.11 | 0.07 | 0.09 | 0.13 | 0.08 | 0.22 |
| chr3  | 52071532  | 52073982  | Foxo1         | ENSMUSG00000044167 | 498  | 0.09 | 0.1  | 0.09 | 0.15 | 0.08 | 0.17 |
| chr3  | 121517579 | 121518461 | Abcd3         | ENSMUSG00000028127 | -193 | 0.13 | 0.19 | 0.06 | 0.12 | 0.12 | 0.13 |
| chr4  | 135411506 | 135412523 | Srsf10        | ENSMUSG00000028676 | 352  | 0.41 | 0.2  | 0.1  | 0.12 | 0.25 | 0.2  |
| chr4  | 147314889 | 147315784 | 2510039O18Rik | ENSMUSG00000044496 | 332  | 0.16 | 0.17 | 0.09 | 0.11 | 0.09 | 0.19 |
| chr4  | 100741393 | 100742353 | Raver2        | ENSMUSG00000035275 | 285  | 0.08 | 0.11 | 0.07 | 0.14 | 0.1  | 0.15 |
| chr4  | 135553358 | 135553581 | Gm13007       | ENSMUSG00000083852 | 31   | 0.84 | 0.76 | 0.56 | 0.66 | 0.74 | 0.82 |
| chr4  | 47003891  | 47005057  | Gabbr2        | ENSMUSG00000039809 | 271  | 0.15 | 0.21 | 0.08 | 0.15 | 0.16 | 0.16 |
| chr4  | 148892283 | 148892694 | Ctnnbp1       | ENSMUSG00000028988 | 143  | 0.11 | 0.15 | 0.09 | 0.17 | 0.13 | 0.29 |
| chr4  | 124571800 | 124572326 | 1700125G02Rik | ENSMUSG00000085263 | -37  | 0.07 | 0.08 | 0.06 | 0.12 | 0.06 | 0.18 |
| chr4  | 129418523 | 129420073 | Khdrbs1       | ENSMUSG00000028790 | 242  | 0.23 | 0.17 | 0.11 | 0.16 | 0.24 | 0.27 |
| chr5  | 100406738 | 100408485 | Hnrnpd        | ENSMUSG00000000568 | 32   | 0.15 | 0.06 | 0.11 | 0.24 | 0.06 | 0.29 |
| chr5  | 135644071 | 135644883 | Bcl7b         | ENSMUSG00000029681 | 324  | 0.27 | 0.27 | 0.07 | 0.15 | 0.15 | 0.17 |
| chr5  | 24107374  | 24108569  | Smarcd3       | ENSMUSG00000028949 | -253 | 0.18 | 0.08 | 0.15 | 0.13 | 0.07 | 0.29 |

|      |           |           |               |                    |       |      |      |      |      |      |      |
|------|-----------|-----------|---------------|--------------------|-------|------|------|------|------|------|------|
| chr5 | 104888479 | 104889440 | Pkd2          | ENSMUSG00000034462 | 398   | 0.37 | 0.36 | 0.11 | 0.18 | 0.22 | 0.24 |
| chr5 | 130647317 | 130648122 | Rabgef1       | ENSMUSG00000025340 | 51    | 0.12 | 0.09 | 0.09 | 0.19 | 0.16 | 0.19 |
| chr5 | 148241460 | 148242812 | Pan3          | ENSMUSG00000029647 | 399   | 0.2  | 0.12 | 0.1  | 0.14 | 0.23 | 0.2  |
| chr5 | 31394949  | 31396025  | Slc30a3       | ENSMUSG00000029151 | 501   | 0.18 | 0.14 | 0.09 | 0.13 | 0.17 | 0.21 |
| chr5 | 115607743 | 115608906 | Mlec          | ENSMUSG00000048578 | -139  | 0.19 | 0.12 | 0.11 | 0.12 | 0.2  | 0.22 |
| chr5 | 35621478  | 35623696  | Adra2c        | ENSMUSG00000045318 | 1372  | 0.13 | 0.2  | 0.1  | 0.18 | 0.14 | 0.16 |
| chr5 | 77444875  | 77445259  | 1700023E05Rik | ENSMUSG00000029248 | 19    | 0.14 | 0.15 | 0.09 | 0.15 | 0.06 | 0.29 |
| chr5 | 111845559 | 111849549 | Mn1           | ENSMUSG00000070576 | 1172  | 0.14 | 0.13 | 0.11 | 0.18 | 0.13 | 0.17 |
| chr5 | 115798513 | 115799388 | Cox6a1        | ENSMUSG00000041697 | -27   | 0.09 | 0.12 | 0.07 | 0.15 | 0.07 | 0.24 |
| chr5 | 141000017 | 141000633 | Chst12        | ENSMUSG00000036599 | 751   | 1    | 0.98 | 0.62 | 0.7  | 0.98 | 0.95 |
| chr6 | 71389801  | 71391295  | Rmnd5a        | ENSMUSG00000002222 | 83    | 0.32 | 0.45 | 0.14 | 0.17 | 0.16 | 0.28 |
| chr6 | 85461428  | 85463942  | Egr4          | ENSMUSG00000071341 | 898   | 0.13 | 0.11 | 0.1  | 0.13 | 0.1  | 0.17 |
| chr7 | 13592985  | 13593571  | Zbtb45        | ENSMUSG00000049600 | 1871  | 0.89 | 0.53 | 0.32 | 0.55 | 0.49 | 0.55 |
| chr7 | 90014441  | 90018737  | Mex3b         | ENSMUSG00000057706 | 746   | 0.22 | 0.19 | 0.11 | 0.17 | 0.14 | 0.2  |
| chr7 | 31098952  | 31099178  | Al428936      | ENSMUSG00000019737 | -761  | 0.46 | 0.36 | 0.26 | 0.41 | 0.7  | 0.57 |
| chr7 | 19589491  | 19591013  | Irf2bp1       | ENSMUSG00000044030 | 838   | 0.11 | 0.12 | 0.1  | 0.15 | 0.13 | 0.18 |
| chr7 | 35437872  | 35440941  | Kctd15        | ENSMUSG00000030499 | -1361 | 0.15 | 0.23 | 0.12 | 0.19 | 0.12 | 0.19 |
| chr7 | 104473727 | 104474521 | Usp35         | ENSMUSG00000035713 | 350   | 0.23 | 0.18 | 0.15 | 0.22 | 0.14 | 0.41 |
| chr7 | 30303303  | 30304489  | 4932431P20Rik | ENSMUSG00000074224 | -328  | 0.14 | 0.18 | 0.1  | 0.17 | 0.16 | 0.18 |
| chr7 | 28149126  | 28149562  | AC157561.1    | ENSMUSG00000080562 | 1011  | NA   | 0.18 | 0.11 | 0.16 | 0.12 | 0.38 |
| chr8 | 73300171  | 73301304  | Pik3r2        | ENSMUSG00000031834 | -159  | 0.39 | 0.22 | 0.08 | 0.11 | 0.15 | 0.21 |
| chr8 | 90482327  | 90486694  | Zfp423        | ENSMUSG00000045333 | -1016 | 0.1  | 0.09 | 0.1  | 0.15 | 0.15 | 0.16 |
| chr8 | 125100378 | 125100895 | Aprt          | ENSMUSG00000006589 | 171   | 0.07 | 0.19 | 0.09 | 0.17 | 0.16 | 0.2  |
| chr8 | 126472748 | 126473484 | Nup133        | ENSMUSG00000039509 | 49    | 0.16 | 0.17 | 0.09 | 0.15 | 0.31 | 0.25 |
| chr8 | 86131817  | 86132711  | Dnajb1        | ENSMUSG00000005483 | 190   | 0.06 | 0.07 | 0.08 | 0.13 | 0.09 | 0.19 |
| chr8 | 36557800  | 36558759  | Eri1          | ENSMUSG00000031527 | 308   | 0.08 | 0.07 | 0.09 | 0.11 | 0.06 | 0.2  |
| chr8 | 72854548  | 72856229  | Gdf1          | ENSMUSG00000055694 | 1724  | 0.39 | 0.5  | 0.39 | 0.49 | 0.41 | 0.51 |
| chr8 | 73416016  | 73416786  | Slc5a5        | ENSMUSG00000000792 | 255   | 0.2  | 0.65 | 0.22 | 0.27 | 0.25 | 0.4  |
| chr8 | 86423579  | 86425146  | Lphn1         | ENSMUSG00000013033 | 358   | 0.1  | 0.13 | 0.07 | 0.13 | 0.11 | 0.14 |
| chr8 | 114400310 | 114400754 | Tmem170       | ENSMUSG00000031953 | 43    | NA   | 0.4  | 0.06 | 0.18 | 0.11 | 0.35 |

|       |           |           |               |                    |       |      |      |      |      |      |      |
|-------|-----------|-----------|---------------|--------------------|-------|------|------|------|------|------|------|
| chr9  | 114471398 | 114473714 | Trim71        | ENSMUSG00000079259 | 931   | 0.13 | 0.1  | 0.08 | 0.16 | 0.08 | 0.16 |
| chr9  | 64988730  | 64989804  | Igdcc3        | ENSMUSG00000032394 | 306   | 0.23 | 0.16 | 0.08 | 0.14 | 0.11 | 0.19 |
| chr9  | 108249961 | 108250641 | Usp4          | ENSMUSG00000032612 | 139   | 0.12 | 0.23 | 0.07 | 0.09 | 0.22 | 0.2  |
| chr9  | 114310177 | 114310805 | Glb1          | ENSMUSG00000045594 | 297   | 0.26 | 0.11 | 0.07 | 0.11 | 0.11 | 0.17 |
| chr9  | 59450839  | 59451170  | Cell6         | ENSMUSG00000032297 | 539   | 0.41 | 0.3  | 0.27 | 0.31 | 0.48 | 0.58 |
| chr9  | 69860268  | 69860757  | Gtf2a2        | ENSMUSG00000033543 | 155   | 0.12 | 0.09 | 0.08 | 0.11 | 0.09 | 0.22 |
| chr9  | 95305634  | 95308180  | Chst2         | ENSMUSG00000033350 | 782   | 0.2  | 0.14 | 0.13 | 0.18 | 0.21 | 0.2  |
| chr9  | 21052841  | 21053098  | S1pr5         | ENSMUSG00000045087 | -82   | 0.14 | 0.12 | 0.1  | 0.19 | 0.21 | 0.28 |
| chr9  | 53513734  | 53514620  | Rab39         | ENSMUSG00000055069 | 160   | 0.1  | 1    | 0.08 | 0.08 | 0.15 | 0.27 |
| chr15 | 101321672 | 101321902 | 5430421N21Rik | ENSMUSG00000067613 | 156   | 0.97 | 0.88 | 0.23 | 0.29 | 0.31 | 0.6  |
| chr11 | 98247994  | 98248196  | Pnmt          | ENSMUSG00000038216 | 69    | 0.81 | 1    | 0.38 | 0.57 | 0.33 | 0.78 |
| chr7  | 31371786  | 31372046  | Wbp7          | ENSMUSG0000006307  | -1557 | 0.12 | NA   | 0.19 | 0.29 | 0.74 | 0.63 |
| chr1  | 75446951  | 75447255  | Accn4         | ENSMUSG00000033007 | 92    | NA   | 0.06 | 0.13 | 0.24 | 0.05 | 0.52 |
| chr2  | 30679673  | 30679925  | Asb6          | ENSMUSG00000039483 | 1024  | 0.46 | 0.54 | 0.37 | 0.44 | 0.81 | 0.72 |
| chr2  | 28767421  | 28767685  | Barhl1        | ENSMUSG00000026805 | 462   | 0.37 | 0.19 | 0.17 | 0.34 | 0.22 | 0.51 |
| chr4  | 139521480 | 139521752 | Klhdc7a       | ENSMUSG00000078234 | 1752  | 0.97 | 0.89 | 0.35 | 0.46 | 0.74 | 0.68 |
| chr6  | 149310037 | 149310422 | Gm15784       | ENSMUSG00000081126 | 21    | NA   | 1    | 0.48 | 0.57 | 0.91 | 0.96 |
| chr7  | 30750140  | 30750632  | Gm10169       | ENSMUSG00000083669 | 198   | 0.96 | 0.6  | 0.36 | 0.49 | 0.71 | 0.85 |
| chr1  | 55419325  | 55420501  | Boll          | ENSMUSG00000025977 | -362  | 0.6  | 0.52 | 0.4  | 0.41 | 0.35 | 0.31 |
| chr11 | 3093000   | 3093702   | Sfi1          | ENSMUSG00000023764 | 59    | 0.76 | 0.74 | 0.84 | 0.85 | 0.58 | 0.86 |
| chr11 | 87430404  | 87431472  | Hsf5          | ENSMUSG00000070345 | 272   | 0.92 | 0.94 | 0.9  | 0.94 | 0.78 | 0.88 |
| chr12 | 21117343  | 21118462  | Asap2         | ENSMUSG00000052632 | 293   | 0.38 | 0.33 | 0.16 | 0.18 | 0.15 | 0.12 |
| chr13 | 31717367  | 31719040  | Foxf2         | ENSMUSG00000038402 | 518   | 0.21 | 0.2  | 0.11 | 0.14 | 0.07 | 0.16 |
| chr15 | 76287822  | 76288560  | Scx           | ENSMUSG00000034161 | 323   | 0.38 | 0.29 | 0.14 | 0.18 | 0.08 | 0.12 |
| chr2  | 102498807 | 102499504 | Slc1a2        | ENSMUSG0000005089  | 339   | 0.77 | 0.75 | 0.09 | 0.15 | 0.61 | 0.11 |
| chr2  | 167013625 | 167015891 | 1110018N20Rik | ENSMUSG00000085151 | 556   | 0.54 | 0.51 | 0.36 | 0.41 | 0.27 | 0.36 |
| chr4  | 11117555  | 11118935  | Ccne2         | ENSMUSG00000028212 | -253  | 0.21 | 0.18 | 0.1  | 0.14 | 0.07 | 0.12 |
| chr6  | 17413387  | 17414161  | Met           | ENSMUSG00000009376 | -26   | 0.33 | 0.3  | 0.12 | 0.22 | 0.07 | 0.16 |
| chr7  | 146037634 | 146038751 | Ppp2r2d       | ENSMUSG00000041769 | 430   | 0.29 | 0.3  | 0.13 | 0.17 | 0.19 | 0.13 |
| chr8  | 19892510  | 19893180  | 6820431F20Rik | ENSMUSG00000071796 | 165   | 0.23 | 0.33 | 0.08 | 0.13 | 0.11 | 0.12 |

|       |           |           |               |                    |      |      |      |      |      |      |      |
|-------|-----------|-----------|---------------|--------------------|------|------|------|------|------|------|------|
| chr9  | 55056657  | 55057292  | Fbxo22        | ENSMUSG00000032309 | 242  | 0.47 | 0.46 | 0.12 | 0.2  | 0.24 | 0.12 |
| chr9  | 41931949  | 41932582  | Sorl1         | ENSMUSG00000049313 | 115  | 0.39 | 0.31 | 0.18 | 0.13 | 0.09 | 0.2  |
| chr11 | 61497496  | 61498606  | Fam83g        | ENSMUSG00000042377 | 458  | 0.47 | 0.3  | 0.17 | 0.2  | 0.12 | 0.22 |
| chr2  | 156865774 | 156866489 | 9830001H06Rik | ENSMUSG00000055485 | -156 | 0.53 | 0.47 | 0.12 | 0.16 | 0.18 | 0.18 |
| chr10 | 127631065 | 127632269 | Gls2          | ENSMUSG00000044005 | 154  | 0.8  | 0.41 | 0.12 | 0.16 | 0.11 | 0.17 |
| chr10 | 45205487  | 45206674  | Lin28b        | ENSMUSG00000063804 | -497 | 0.19 | 0.3  | 0.1  | 0.15 | 0.09 | 0.17 |
| chr10 | 94406234  | 94408200  | Plxnc1        | ENSMUSG00000074785 | -5   | 0.11 | 0.17 | 0.1  | 0.15 | 0.07 | 0.12 |
| chr10 | 122513081 | 122513626 | Mon2          | ENSMUSG00000034602 | 208  | 0.18 | 0.36 | 0.11 | 0.15 | 0.06 | 0.17 |
| chr10 | 122633381 | 122634397 | Usp15         | ENSMUSG00000020124 | 102  | 0.18 | 0.37 | 0.09 | 0.2  | 0.1  | 0.17 |
| chr10 | 21713713  | 21714719  | Sgk1          | ENSMUSG00000019970 | -256 | 0.14 | 0.36 | 0.1  | 0.17 | 0.07 | 0.15 |
| chr10 | 31328401  | 31329461  | Rnf217        | ENSMUSG00000063760 | 59   | 0.09 | 0.16 | 0.08 | 0.14 | 0.06 | 0.15 |
| chr10 | 26093497  | 26095333  | L3mbt3        | ENSMUSG00000039089 | -653 | 0.19 | 0.35 | 0.08 | 0.14 | 0.1  | 0.13 |
| chr10 | 70700385  | 70700921  | Tfam          | ENSMUSG00000003923 | -227 | 0.14 | 0.41 | 0.08 | 0.18 | 0.08 | 0.13 |
| chr10 | 79578085  | 79579685  | Stk11         | ENSMUSG00000003068 | 337  | 0.09 | 0.33 | 0.12 | 0.18 | 0.06 | 0.1  |
| chr10 | 116018223 | 116019225 | 5330438D12Rik | ENSMUSG00000052291 | 387  | 0.04 | 0.23 | 0.09 | 0.13 | 0.06 | 0.14 |
| chr10 | 42398634  | 42399201  | Ostm1         | ENSMUSG00000038280 | 195  | 0.07 | 0.33 | 0.09 | 0.18 | 0.05 | 0.14 |
| chr11 | 11585307  | 11586484  | Gm11999       | ENSMUSG00000085652 | -492 | 0.22 | 0.32 | 0.11 | 0.21 | 0.1  | 0.15 |
| chr11 | 68213036  | 68214116  | Ntn1          | ENSMUSG00000020902 | 749  | 0.14 | 0.28 | 0.13 | 0.19 | 0.08 | 0.13 |
| chr11 | 21270445  | 21271492  | Ugp2          | ENSMUSG00000001891 | -488 | 0.17 | 0.29 | 0.13 | 0.15 | 0.09 | 0.13 |
| chr11 | 62945916  | 62946764  | Pmp22         | ENSMUSG00000018217 | 269  | 0.16 | 0.42 | 0.14 | 0.16 | 0.11 | 0.12 |
| chr11 | 11925557  | 11926335  | Grb10         | ENSMUSG00000020176 | 381  | 0.35 | 0.58 | 0.34 | 0.43 | 0.37 | 0.41 |
| chr12 | 56499644  | 56500175  | Psmc6         | ENSMUSG00000021024 | 147  | 0.32 | 0.35 | 0.11 | 0.23 | 0.1  | 0.23 |
| chr12 | 86939748  | 86940747  | Jdp2          | ENSMUSG00000034271 | -119 | 0.3  | 0.41 | 0.09 | 0.13 | 0.11 | 0.15 |
| chr12 | 56699824  | 56701801  | Insm2         | ENSMUSG00000045440 | 908  | 0.18 | 0.28 | 0.12 | 0.19 | 0.12 | 0.15 |
| chr12 | 8308285   | 8309199   | Gdf7          | ENSMUSG00000037660 | 18   | 0.21 | 0.28 | 0.13 | 0.2  | 0.1  | 0.15 |
| chr12 | 66137204  | 66137674  | Prpf39        | ENSMUSG00000035597 | 119  | 0.17 | 0.38 | 0.09 | 0.11 | 0.06 | 0.13 |
| chr12 | 29320240  | 29321015  | Rps7          | ENSMUSG00000061477 | 191  | 0.14 | 0.43 | 0.19 | 0.16 | 0.17 | 0.13 |
| chr13 | 99124217  | 99126114  | Foxd1         | ENSMUSG00000078302 | 965  | 0.2  | 0.27 | 0.11 | 0.13 | 0.1  | 0.13 |
| chr13 | 94827405  | 94828070  | Lhfpl2        | ENSMUSG00000045312 | -14  | 0.19 | 0.24 | 0.11 | 0.14 | 0.1  | 0.15 |
| chr13 | 34435998  | 34437457  | Slc22a23      | ENSMUSG00000038267 | -655 | 0.13 | 0.28 | 0.11 | 0.13 | 0.09 | 0.14 |

|       |          |          |               |                    |      |      |      |      |      |      |      |
|-------|----------|----------|---------------|--------------------|------|------|------|------|------|------|------|
| chr13 | 30751701 | 30752094 | Dusp22        | ENSMUSG00000069255 | 29   | 0.09 | 0.31 | 0.06 | 0.14 | 0.08 | 0.06 |
| chr13 | 97440314 | 97441224 | Hmgcr         | ENSMUSG00000021670 | -332 | 0.12 | 0.31 | 0.13 | 0.2  | 0.08 | 0.19 |
| chr14 | 58143520 | 58144449 | Il17d         | ENSMUSG00000050222 | 318  | 0.16 | 0.16 | 0.09 | 0.08 | 0.07 | 0.09 |
| chr14 | 6240377  | 6240760  | Gm3468        | ENSMUSG00000079372 | 120  | 0.17 | 0.23 | 0.16 | 0.12 | 0.03 | 0.12 |
| chr14 | 55495240 | 55496443 | Ppp1r3e       | ENSMUSG00000093691 | -353 | 0.18 | 0.32 | 0.09 | 0.15 | 0.08 | 0.14 |
| chr15 | 43308713 | 43309156 | Ttc35         | ENSMUSG00000022337 | 159  | 0.18 | 0.39 | 0.07 | 0.19 | 0.09 | 0.11 |
| chr15 | 74346483 | 74350229 | Bai1          | ENSMUSG00000034730 | 1730 | 0.11 | 0.23 | 0.11 | 0.15 | 0.09 | 0.15 |
| chr15 | 75771302 | 75771903 | Zfp623        | ENSMUSG00000050846 | 220  | 0.12 | 0.25 | 0.13 | 0.14 | 0.09 | 0.12 |
| chr15 | 98701704 | 98702792 | Mli2          | ENSMUSG00000048154 | -634 | 0.14 | 0.28 | 0.1  | 0.14 | 0.12 | 0.13 |
| chr15 | 6657477  | 6659529  | Rictor        | ENSMUSG00000050310 | 122  | 0.14 | 0.42 | 0.12 | 0.17 | 0.16 | 0.12 |
| chr16 | 18620835 | 18621907 | Gp1bb         | ENSMUSG00000050761 | 88   | 0.41 | 0.4  | 0.24 | 0.37 | 0.16 | 0.3  |
| chr16 | 45158725 | 45159383 | Slc35a5       | ENSMUSG00000022664 | -235 | 0.31 | 0.29 | 0.14 | 0.18 | 0.11 | 0.16 |
| chr16 | 95923470 | 95924500 | Ets2          | ENSMUSG00000022895 | 303  | 0.19 | 0.26 | 0.13 | 0.16 | 0.08 | 0.17 |
| chr16 | 78576497 | 78577161 | D16Ert472e    | ENSMUSG00000022864 | 73   | 0.16 | 0.26 | 0.08 | 0.1  | 0.08 | 0.1  |
| chr16 | 4963986  | 4964667  | Anks3         | ENSMUSG00000022515 | -22  | 0.33 | 0.41 | 0.11 | 0.14 | 0.09 | 0.19 |
| chr16 | 17530691 | 17531400 | Thap7         | ENSMUSG00000022760 | -296 | 0.23 | 0.33 | 0.1  | 0.15 | 0.08 | 0.13 |
| chr16 | 46496412 | 46498047 | Pvrl3         | ENSMUSG00000022656 | -344 | 0.14 | 0.3  | 0.09 | 0.13 | 0.11 | 0.12 |
| chr17 | 69731825 | 69733626 | Zfp161        | ENSMUSG00000049672 | 335  | 0.27 | 0.31 | 0.09 | 0.13 | 0.13 | 0.15 |
| chr17 | 44871399 | 44873584 | Runx2         | ENSMUSG00000039153 | -849 | 0.31 | 0.36 | 0.15 | 0.22 | 0.17 | 0.21 |
| chr17 | 84584941 | 84588054 | Zfp3612       | ENSMUSG00000045817 | -20  | 0.22 | 0.28 | 0.13 | 0.2  | 0.11 | 0.13 |
| chr17 | 27759609 | 27760736 | Nudt3         | ENSMUSG00000024213 | -383 | 0.19 | 0.29 | 0.12 | 0.2  | 0.1  | 0.18 |
| chr17 | 56723571 | 56724975 | Safb2         | ENSMUSG00000042625 | -549 | 0.17 | 0.25 | 0.12 | 0.16 | 0.08 | 0.13 |
| chr17 | 7374090  | 7374872  | Rps6ka2       | ENSMUSG00000023809 | 17   | 0.13 | 0.29 | 0.12 | 0.09 | 0.06 | 0.11 |
| chr17 | 71901152 | 71901860 | Spdya         | ENSMUSG00000052525 | 105  | 0.19 | 0.31 | 0.13 | 0.18 | 0.09 | 0.14 |
| chr17 | 32236972 | 32237418 | Pdxk-ps       | ENSMUSG0000002791  | 36   | 0.13 | 0.37 | 0.16 | 0.18 | 0.1  | 0.21 |
| chr17 | 63848747 | 63849982 | Fbxl17        | ENSMUSG00000023965 | 2    | 0.07 | 0.16 | 0.09 | 0.12 | 0.07 | 0.11 |
| chr18 | 5591345  | 5593503  | Zeb1          | ENSMUSG00000024238 | 566  | 0.33 | 0.33 | 0.1  | 0.12 | 0.11 | 0.15 |
| chr18 | 14128648 | 14130119 | Zfp521        | ENSMUSG00000024420 | 1859 | 0.16 | 0.24 | 0.08 | 0.11 | 0.08 | 0.11 |
| chr18 | 10609527 | 10610463 | Esco1         | ENSMUSG00000024293 | 112  | 0.16 | 0.35 | 0.1  | 0.16 | 0.1  | 0.15 |
| chr19 | 57435112 | 57436200 | B230217O12Rik | ENSMUSG00000085096 | -391 | 0.23 | 0.31 | 0.12 | 0.21 | 0.09 | 0.21 |

|       |           |           |               |                    |      |      |      |      |      |      |      |
|-------|-----------|-----------|---------------|--------------------|------|------|------|------|------|------|------|
| chr19 | 30104404  | 30105833  | Uhrf2         | ENSMUSG00000024817 | 115  | 0.13 | 0.22 | 0.12 | 0.13 | 0.07 | 0.14 |
| chr19 | 25580093  | 25581460  | Dmrt1         | ENSMUSG00000024837 | 668  | 0.22 | 0.45 | 0.16 | 0.26 | 0.12 | 0.16 |
| chr2  | 24774297  | 24775278  | Ehmt1         | ENSMUSG00000036893 | 323  | 0.31 | 0.38 | 0.1  | 0.11 | 0.1  | 0.16 |
| chr2  | 180444355 | 180445429 | Dido1         | ENSMUSG00000038914 | -188 | 0.24 | 0.32 | 0.13 | 0.17 | 0.09 | 0.14 |
| chr2  | 146909574 | 146911293 | Nkx2-4        | ENSMUSG00000054160 | 748  | 0.12 | 0.18 | 0.09 | 0.12 | 0.05 | 0.1  |
| chr2  | 3391706   | 3392571   | Suv39h2       | ENSMUSG00000026646 | 94   | 0.22 | 0.37 | 0.09 | 0.18 | 0.09 | 0.18 |
| chr2  | 167065629 | 167066084 | Ptgis         | ENSMUSG00000017969 | 233  | 0.23 | 0.37 | 0.15 | 0.22 | 0.11 | 0.21 |
| chr2  | 57090095  | 57090995  | Gpd2          | ENSMUSG00000026827 | -163 | 0.18 | 0.42 | 0.12 | 0.19 | 0.1  | 0.14 |
| chr2  | 60047480  | 60048483  | Baz2b         | ENSMUSG00000026987 | -176 | 0.17 | 0.32 | 0.13 | 0.2  | 0.09 | 0.15 |
| chr2  | 29107028  | 29108799  | 6530402F18Rik | ENSMUSG00000079499 | 600  | 0.21 | 0.31 | 0.15 | 0.14 | 0.08 | 0.18 |
| chr2  | 103601004 | 103601573 | Nat10         | ENSMUSG00000027185 | -205 | 0.2  | 0.26 | 0.11 | 0.17 | 0.07 | 0.13 |
| chr2  | 146047001 | 146049584 | Insm1         | ENSMUSG00000068154 | 635  | 0.16 | 0.31 | 0.12 | 0.2  | 0.13 | 0.15 |
| chr3  | 102739297 | 102740153 | Sycp1         | ENSMUSG00000027855 | 298  | 0.54 | 0.91 | 0.91 | 0.92 | 0.69 | 0.95 |
| chr3  | 8666662   | 8667747   | Hey1          | ENSMUSG00000040289 | -165 | 0.16 | 0.24 | 0.1  | 0.15 | 0.08 | 0.14 |
| chr3  | 51143687  | 51145396  | Elf2          | ENSMUSG00000037174 | -53  | 0.13 | 0.17 | 0.09 | 0.11 | 0.08 | 0.14 |
| chr3  | 33698632  | 33699511  | Ttc14         | ENSMUSG00000027677 | 194  | 0.12 | 0.19 | 0.11 | 0.14 | 0.1  | 0.14 |
| chr3  | 119485485 | 119486349 | Ptbp2         | ENSMUSG00000028134 | 389  | 0.22 | 0.47 | 0.11 | 0.15 | 0.15 | 0.2  |
| chr3  | 100488949 | 100490237 | Man1a2        | ENSMUSG00000008763 | -362 | 0.08 | 0.2  | 0.1  | 0.17 | 0.09 | 0.13 |
| chr4  | 32325381  | 32327270  | Bach2         | ENSMUSG00000040270 | 546  | 0.29 | 0.27 | 0.13 | 0.14 | 0.13 | 0.17 |
| chr4  | 125825741 | 125826924 | Fam176b       | ENSMUSG00000050212 | 556  | 0.2  | 0.3  | 0.19 | 0.16 | 0.08 | 0.17 |
| chr4  | 41660353  | 41660809  | 2810432D09Rik | ENSMUSG00000036114 | -15  | 0.28 | 0.36 | 0.11 | 0.19 | 0.1  | 0.15 |
| chr4  | 128964804 | 128965169 | Sync          | ENSMUSG0000001333  | 125  | 0.4  | 0.48 | 0.22 | 0.23 | 0.19 | 0.36 |
| chr4  | 122781861 | 122782886 | Bmp8b         | ENSMUSG0000002384  | -35  | 0.14 | 0.21 | 0.13 | 0.19 | 0.1  | 0.15 |
| chr4  | 123426979 | 123427844 | Akirin1       | ENSMUSG00000023075 | 63   | 0.16 | 0.29 | 0.13 | 0.13 | 0.09 | 0.16 |
| chr4  | 104039578 | 104040509 | Dab1          | ENSMUSG00000028519 | 325  | 0.14 | 0.32 | 0.11 | 0.15 | 0.08 | 0.16 |
| chr4  | 151368765 | 151371119 | Phf13         | ENSMUSG00000047777 | 425  | 0.1  | 0.21 | 0.09 | 0.14 | 0.11 | 0.14 |
| chr5  | 46247609  | 46249249  | Lcorl         | ENSMUSG00000015882 | -639 | 0.27 | 0.23 | 0.15 | 0.19 | 0.08 | 0.13 |
| chr5  | 145528904 | 145529696 | Trrap         | ENSMUSG00000045482 | 339  | 0.25 | 0.3  | 0.11 | 0.17 | 0.08 | 0.12 |
| chr5  | 144492374 | 144493643 | Usp42         | ENSMUSG00000051306 | 141  | 0.18 | 0.26 | 0.1  | 0.13 | 0.11 | 0.12 |
| chr5  | 114358102 | 114359172 | Coro1c        | ENSMUSG0000004530  | 17   | 0.14 | 0.19 | 0.08 | 0.14 | 0.05 | 0.12 |

|      |           |           |               |                    |       |      |      |      |      |      |      |
|------|-----------|-----------|---------------|--------------------|-------|------|------|------|------|------|------|
| chr5 | 122951259 | 122952758 | Atp2a2        | ENSMUSG00000029467 | 175   | 0.1  | 0.15 | 0.09 | 0.13 | 0.06 | 0.11 |
| chr5 | 73305192  | 73306418  | Slain2        | ENSMUSG00000036087 | 262   | 0.16 | 0.2  | 0.08 | 0.16 | 0.07 | 0.12 |
| chr5 | 42154559  | 42155636  | Nkx3-2        | ENSMUSG00000049691 | 362   | 0.19 | 0.44 | 0.1  | 0.17 | 0.14 | 0.14 |
| chr5 | 123526189 | 123526779 | Tmem120b      | ENSMUSG00000054434 | 200   | 0.14 | 0.34 | 0.08 | 0.14 | 0.1  | 0.11 |
| chr5 | 121670142 | 121671244 | Gm15800       | ENSMUSG00000042744 | 465   | 0.18 | 0.41 | 0.12 | 0.19 | 0.13 | 0.22 |
| chr6 | 47892969  | 47893595  | Zfp783        | ENSMUSG00000072653 | 112   | 0.28 | 0.28 | 0.17 | 0.25 | 0.12 | 0.15 |
| chr6 | 28782067  | 28783707  | Lrrc4         | ENSMUSG00000049939 | -1140 | 0.14 | 0.2  | 0.09 | 0.14 | 0.06 | 0.14 |
| chr6 | 87680706  | 87681577  | Ccdc48        | ENSMUSG00000068263 | 278   | 0.28 | 0.37 | 0.1  | 0.16 | 0.07 | 0.12 |
| chr6 | 128312451 | 128313282 | 5930416119Rik | ENSMUSG00000048668 | -36   | 0.09 | 0.19 | 0.14 | 0.13 | 0.06 | 0.1  |
| chr6 | 37820514  | 37821689  | Trim24        | ENSMUSG00000029833 | 290   | 0.1  | 0.26 | 0.1  | 0.24 | 0.08 | 0.13 |
| chr6 | 99470484  | 99473043  | Foxp1         | ENSMUSG00000030067 | -772  | 0.13 | 0.3  | 0.1  | 0.13 | 0.11 | 0.16 |
| chr7 | 38968684  | 38969116  | 1600014C10Rik | ENSMUSG00000054676 | 94    | 0.16 | 0.25 | 0.13 | 0.15 | 0.08 | 0.13 |
| chr7 | 137408505 | 137410026 | Fgfr2         | ENSMUSG00000030849 | 262   | 0.22 | 0.22 | 0.1  | 0.17 | 0.09 | 0.15 |
| chr7 | 107269606 | 107270180 | Pold3         | ENSMUSG00000030726 | 72    | 0.31 | 0.42 | 0.14 | 0.14 | 0.11 | 0.2  |
| chr7 | 53121340  | 53121876  | Grin2d        | ENSMUSG00000002771 | 443   | 0.23 | 0.33 | 0.08 | 0.12 | 0.1  | 0.13 |
| chr7 | 97128617  | 97129918  | Eed           | ENSMUSG00000030619 | -198  | 0.27 | 0.39 | 0.12 | 0.16 | 0.14 | 0.14 |
| chr7 | 86660181  | 86660773  | Al854517      | ENSMUSG00000085554 | 359   | 0.23 | 0.44 | 0.11 | 0.17 | 0.13 | 0.16 |
| chr7 | 56044245  | 56044705  | Zdhhc13       | ENSMUSG00000030471 | 102   | 0.1  | 0.32 | 0.09 | 0.11 | 0.05 | 0.14 |
| chr8 | 13493806  | 13494518  | Gas6          | ENSMUSG00000031451 | 373   | 0.11 | 0.32 | 0.22 | 0.26 | 0.08 | 0.16 |
| chr8 | 19784572  | 19785241  | Gm10060       | ENSMUSG00000059078 | 160   | 0.07 | 0.23 | 0.09 | 0.07 | 0.09 | 0.11 |
| chr8 | 4249280   | 4249706   | Gm14378       | ENSMUSG00000089736 | -836  | 0.46 | 0.73 | 0.56 | 0.62 | 0.41 | 0.47 |
| chr9 | 20988447  | 20988896  | Pde4a         | ENSMUSG00000032177 | 126   | 0.32 | 0.38 | 0.13 | 0.22 | 0.15 | 0.18 |
| chr9 | 98756887  | 98757196  | Gm6406        | ENSMUSG00000063058 | 31    | 0.87 | 0.93 | 0.81 | 0.89 | 0.68 | 0.77 |
| chr9 | 118834960 | 118836190 | Gm2415        | ENSMUSG00000086119 | -199  | 0.22 | 0.25 | 0.1  | 0.17 | 0.1  | 0.13 |
| chr9 | 66439739  | 66441481  | Usp3          | ENSMUSG00000032376 | 155   | 0.18 | 0.32 | 0.14 | 0.15 | 0.08 | 0.16 |
| chr9 | 75256997  | 75258102  | Mapk6         | ENSMUSG00000042688 | -383  | 0.16 | 0.42 | 0.13 | 0.15 | 0.12 | 0.15 |
| chr9 | 103266897 | 103268419 | Cdv3          | ENSMUSG00000032803 | -349  | 0.1  | 0.23 | 0.17 | 0.17 | 0.12 | 0.17 |
| chr9 | 107611573 | 107612351 | Sema3f        | ENSMUSG00000034684 | 844   | 0.08 | 0.27 | 0.12 | 0.11 | 0.09 | 0.1  |
| chr9 | 35228711  | 35229698  | Cdon          | ENSMUSG00000038119 | 491   | 0.11 | 0.28 | 0.09 | 0.11 | 0.09 | 0.1  |
| chr3 | 36962422  | 36962785  | Adad1         | ENSMUSG00000027719 | 154   | 0.68 | 0.83 | 0.55 | 0.74 | 0.44 | 0.56 |

|       |           |           |               |                    |       |      |      |      |      |      |      |
|-------|-----------|-----------|---------------|--------------------|-------|------|------|------|------|------|------|
| chr8  | 20019789  | 20020448  | 2610005L07Rik | ENSMUSG00000071793 | 175   | 0.43 | 0.66 | 0.21 | 0.48 | 0.18 | 0.26 |
| chr8  | 24367160  | 24367790  | Golga7        | ENSMUSG00000015341 | 18    | 0.78 | 0.86 | 0.43 | 0.45 | 0.49 | 0.27 |
| chr9  | 55388629  | 55389061  | Gm17226       | ENSMUSG00000090270 | -150  | 0.29 | 0.53 | 0.07 | 0.15 | 0.04 | 0.22 |
| chr11 | 101025326 | 101025842 | Plekhh3       | ENSMUSG00000035172 | 1054  | 0.81 | 0.75 | 0.37 | 0.41 | 0.34 | 0.38 |
| chr12 | 20926270  | 20927392  | 3110053B16Rik | ENSMUSG00000085642 | 83    | 0.7  | 0.82 | 0.21 | 0.39 | 0.36 | 0.25 |
| chr12 | 18859323  | 18860033  | Gm3944        | ENSMUSG00000090885 | -49   | 0.7  | 0.58 | 0.59 | 0.69 | 0.16 | 0.43 |
| chr13 | 55098546  | 55098786  | Unc5a         | ENSMUSG00000025876 | 766   | 0.68 | 0.69 | 0.31 | 0.36 | 0.24 | 0.59 |
| chr14 | 71036558  | 71036835  | Epb4.9        | ENSMUSG00000022099 | -911  | 0.88 | 0.83 | 0.41 | 0.51 | 0.28 | 0.7  |
| chr18 | 37903392  | 37903887  | Pcdhga9       | ENSMUSG00000023036 | 1891  | 0.88 | 0.9  | 0.73 | 0.78 | 0.41 | 0.57 |
| chr2  | 29700849  | 29701992  | Mir219-2      | ENSMUSG00000065485 | -173  | 0.54 | 0.59 | 0.33 | 0.4  | 0.13 | 0.34 |
| chr3  | 54614894  | 54615327  | Gm10254       | ENSMUSG00000069011 | 62    | 0.97 | 0.94 | 0.87 | 0.97 | 0.53 | 0.88 |
| chr4  | 107518815 | 107519218 | Lrp8          | ENSMUSG00000028613 | 210   | 0.96 | 0.89 | 0.84 | 0.87 | 0.5  | 0.78 |
| chr5  | 123213769 | 123214036 | Camkk2        | ENSMUSG00000029471 | 351   | 0.74 | 0.74 | 0.13 | 0.16 | 0.31 | 0.22 |
| chr7  | 25370639  | 25371071  | Eth1          | ENSMUSG00000064254 | -1707 | 0.87 | 0.76 | 0.37 | 0.43 | 0.28 | 0.33 |
| chr8  | 74126023  | 74126842  | Fam129c       | ENSMUSG00000043243 | 266   | 0.59 | 0.57 | 0.09 | 0.14 | 0.21 | 0.15 |
| chr8  | 86525195  | 86525718  | 1700067K01Rik | ENSMUSG00000046408 | 55    | 0.68 | 0.71 | 0.46 | 0.53 | 0.26 | 0.53 |
| chr10 | 82417108  | 82417416  | Gm4799        | ENSMUSG00000071151 | 173   | 0.8  | 0.86 | 0.57 | 0.71 | 0.53 | 0.7  |
| chr10 | 78996117  | 78996659  | Ppap2c        | ENSMUSG00000052151 | 99    | 0.32 | 0.57 | 0.09 | 0.09 | 0.05 | 0.14 |
| chr10 | 4540340   | 4541532   | Fbxo5         | ENSMUSG00000019773 | -5    | 0.26 | 0.45 | 0.13 | 0.16 | 0.12 | 0.16 |
| chr10 | 57205995  | 57206825  | 4930467K11Rik | ENSMUSG00000085621 | -251  | 0.4  | 0.7  | 0.15 | 0.26 | 0.25 | 0.16 |
| chr10 | 116661113 | 116661605 | Yeats4        | ENSMUSG00000020171 | 172   | 0.14 | 0.5  | 0.15 | 0.17 | 0.09 | 0.15 |
| chr11 | 5688222   | 5688830   | Dbnl          | ENSMUSG00000020476 | 35    | 0.17 | 0.68 | 0.13 | 0.13 | 0.11 | 0.14 |
| chr11 | 50049933  | 50051002  | Gm16641       | ENSMUSG00000085364 | -44   | 0.09 | 0.5  | 0.12 | 0.18 | 0.12 | 0.15 |
| chr11 | 100006624 | 100007121 | Krt19         | ENSMUSG00000020911 | 562   | 0.26 | 0.77 | 0.15 | 0.08 | 0.19 | 0.11 |
| chr12 | 110697954 | 110698238 | Dik1          | ENSMUSG00000040856 | 43    | 0.93 | 0.88 | 0.28 | 0.17 | 0.35 | 0.38 |
| chr13 | 43711196  | 43711664  | Rnf182        | ENSMUSG00000044164 | 78    | 0.09 | 0.49 | 0.1  | 0.12 | 0.09 | 0.14 |
| chr14 | 31362220  | 31362800  | Tkt           | ENSMUSG00000021957 | 193   | 0.21 | 0.57 | 0.11 | 0.12 | 0.1  | 0.18 |
| chr15 | 99223267  | 99223921  | Tmbim6        | ENSMUSG00000023010 | 281   | 0.14 | 0.48 | 0.13 | 0.16 | 0.05 | 0.12 |
| chr15 | 89259744  | 89260416  | Chkb          | ENSMUSG00000022617 | -219  | 0.2  | 0.8  | 0.14 | 0.17 | 0.21 | 0.16 |
| chr17 | 23879083  | 23879721  | 9530082P21Rik | ENSMUSG00000086281 | -799  | 0.62 | 0.68 | 0.19 | 0.18 | 0.25 | 0.35 |



|       |           |           |               |                     |      |      |      |      |      |      |      |
|-------|-----------|-----------|---------------|---------------------|------|------|------|------|------|------|------|
| chr17 | 24940995  | 24941511  | 4930528F23Rik | ENSMUSG00000024155  | -74  | 0.25 | 0.55 | 0.14 | 0.23 | 0.05 | 0.18 |
| chr18 | 11052636  | 11052987  | 1010001N08Rik | ENSMUSG000000087274 | -246 | 0.22 | 0.54 | 0.14 | 0.15 | 0.04 | 0.12 |
| chr2  | 52600926  | 52601771  | Stam2         | ENSMUSG000000055371 | -158 | 0.26 | 0.44 | 0.15 | 0.14 | 0.1  | 0.18 |
| chr2  | 71227093  | 71227643  | Hat1          | ENSMUSG000000027018 | 51   | 0.14 | 0.69 | 0.2  | 0.28 | 0.09 | 0.17 |
| chr2  | 148233043 | 148233425 | Thbd          | ENSMUSG000000074743 | 690  | 0.15 | 0.52 | 0.13 | 0.36 | 0.07 | 0.23 |
| chr2  | 35317761  | 35318144  | Ggta1         | ENSMUSG000000035778 | 799  | 0.5  | 0.46 | 0.11 | 0.17 | 0.06 | 0.06 |
| chr2  | 24222977  | 24223308  | Psd4          | ENSMUSG000000026979 | 42   | 0.07 | 0.73 | 0.12 | 0.13 | 0.13 | 0.12 |
| chr3  | 108394116 | 108395135 | Wdr47         | ENSMUSG000000040389 | 428  | 0.33 | 0.95 | 0.12 | 0.19 | 0.52 | 0.2  |
| chr4  | 34136742  | 34137118  | Spaca1        | ENSMUSG000000028264 | 84   | 0.67 | 0.73 | 0.21 | 0.5  | 0.2  | 0.28 |
| chr5  | 135421999 | 135422286 | Cldn4         | ENSMUSG000000047501 | 662  | 0.54 | 0.71 | 0.29 | 0.51 | 0.2  | 0.35 |
| chr5  | 106160962 | 106161453 | Lrrc8d        | ENSMUSG000000046079 | 198  | 0.45 | 0.61 | 0.22 | 0.32 | 0.2  | 0.23 |
| chr7  | 89319603  | 89320304  | Sh3gl3        | ENSMUSG000000030638 | 225  | 0.46 | 0.61 | 0.2  | 0.28 | 0.15 | 0.21 |
| chr7  | 56501140  | 56502402  | Nav2          | ENSMUSG000000052512 | 212  | 0.1  | 0.44 | 0.13 | 0.17 | 0.1  | 0.16 |
| chr8  | 86545083  | 86545285  | Palm3         | ENSMUSG000000047986 | -186 | 0.45 | 0.48 | 0.11 | 0.21 | 0.08 | 0.19 |
| chr8  | 73034047  | 73034718  | Uba52         | ENSMUSG000000090137 | -133 | 0.07 | 0.48 | 0.04 | 0.09 | 0.07 | 0.17 |
| chr9  | 117949220 | 117950334 | Azi2          | ENSMUSG000000039285 | 160  | 0.16 | 0.53 | 0.12 | 0.14 | 0.13 | 0.21 |
| chr9  | 95650218  | 95650885  | Trpc1         | ENSMUSG000000032839 | 226  | 0.27 | 0.76 | 0.18 | 0.19 | 0.23 | 0.17 |
| chr9  | 42328872  | 42329196  | AC136903.1    | ENSMUSG000000093745 | -120 | 0.08 | 0.63 | 0.08 | 0.13 | 0.06 | 0.11 |
| chr11 | 86922945  | 86923437  | Fam33a        | ENSMUSG000000020492 | 438  | 1    | 0.75 | 0.12 | 0.57 | 0.12 | 0.19 |
| chr1  | 186669379 | 186669874 | Mosc2         | ENSMUSG000000073481 | -176 | 0.3  | 1    | 0.13 | 0.33 | 0.23 | 0.18 |
| chr11 | 94189609  | 94189966  | Ankrd40       | ENSMUSG000000020864 | 219  | NA   | 1    | 0.1  | 0.12 | 0.15 | 0.11 |
| chr13 | 58486142  | 58486765  | 2210016F16Rik | ENSMUSG000000021550 | 133  | 0.17 | 0.85 | 0.29 | 0.19 | 0.1  | 0.3  |
| chr14 | 120876932 | 120878324 | Rap2a         | ENSMUSG000000051615 | -38  | 0.25 | 1    | 0.13 | 0.15 | 0.14 | 0.19 |
| chr15 | 79921541  | 79922313  | Syngr1        | ENSMUSG000000022415 | 163  | 0.17 | 0.93 | 0.09 | 0.13 | 0.26 | 0.13 |
| chr16 | 17233452  | 17234234  | Hic2          | ENSMUSG000000050240 | 178  | 0.08 | 1    | 0.14 | 0.14 | 0.15 | 0.11 |
| chr2  | 25562174  | 25562931  | Bmyc          | ENSMUSG000000049086 | 153  | 0.4  | 1    | 0.17 | 0.39 | 0.15 | 0.18 |
| chr2  | 23089933  | 23090188  | Gm13422       | ENSMUSG000000084098 | -696 | 0.38 | 0.85 | 0.78 | 0.82 | 0.15 | 0.49 |
| chr2  | 80478915  | 80479314  | Nup35         | ENSMUSG000000026999 | 141  | 0.22 | 0.79 | 0.17 | 0.1  | 0.09 | 0.12 |
| chr3  | 107261124 | 107263276 | Kcnc4         | ENSMUSG000000027895 | -384 | 0.14 | 0.93 | 0.13 | 0.2  | 0.18 | 0.14 |
| chr4  | 116324023 | 116324303 | Akr1a1        | ENSMUSG000000028692 | 122  | 0.5  | 1    | 0.1  | 0.12 | 0.06 | 0.23 |

|       |           |           |               |                     |      |      |      |      |      |      |      |
|-------|-----------|-----------|---------------|---------------------|------|------|------|------|------|------|------|
| chr4  | 125911185 | 125911732 | Mtap7d1       | ENSMUSG00000028849  | 562  | 0.67 | 0.58 | 0.63 | 0.67 | 0.9  | 0.79 |
| chr9  | 70390129  | 70391224  | Sltm          | ENSMUSG00000032212  | 10   | 0.12 | 0.12 | 0.1  | 0.14 | 0.32 | 0.13 |
| chr2  | 25977769  | 25978531  | Nacc2         | ENSMUSG00000026932  | 153  | 0.08 | 0.06 | 0.1  | 0.1  | 0.2  | 0.12 |
| chr8  | 129469428 | 129469920 | Tomm20        | ENSMUSG00000058779  | 49   | 0.18 | 0.16 | 0.09 | 0.19 | 0.26 | 0.14 |
| chr14 | 31989600  | 31989971  | Nisch         | ENSMUSG00000021910  | -11  | 0.43 | 0.36 | 0.52 | 0.71 | 0.86 | 0.67 |
| chr17 | 34048518  | 34048958  | Daxx          | ENSMUSG00000002307  | -957 | 0.33 | 0.26 | 0.6  | 0.69 | 0.83 | 0.78 |
| chr5  | 144952066 | 144952351 | Bhlha15       | ENSMUSG00000052271  | 1053 | 0.16 | 0.21 | 0.67 | 0.77 | 0.57 | 0.61 |
| chr8  | 73985340  | 73985807  | Abhd8         | ENSMUSG00000007950  | 1983 | 0.17 | 0.17 | 0.31 | 0.5  | 0.55 | 0.41 |
| chr2  | 25993985  | 25994368  | 1810012K08Rik | ENSMUSG000000087595 | 110  | 0.28 | 0.32 | 0.81 | 0.74 | 0.9  | 0.79 |
| chr5  | 23830773  | 23831084  | Kcnh2         | ENSMUSG00000038319  | 679  | 0.1  | 0.42 | 0.84 | 0.87 | 0.88 | 0.92 |
| chr13 | 3477421   | 3477736   | 2810429I04Rik | ENSMUSG000000086566 | 89   | 0.36 | 0.06 | 0.1  | 0.09 | 0.41 | 0.15 |
| chr19 | 6117858   | 6118613   | Sac3d1        | ENSMUSG000000024790 | 351  | 0.47 | 0.11 | 0.13 | 0.11 | 0.54 | 0.16 |
| chr5  | 31502786  | 31502994  | Zfp513        | ENSMUSG000000043059 | -231 | 0.26 | 0.26 | 0.59 | 0.41 | 0.74 | 0.77 |
| chr12 | 25178380  | 25178591  | Gm16372       | ENSMUSG000000057160 | 36   | 0.09 | 0.1  | 0.37 | 0.46 | 0.74 | 0.58 |
| chr1  | 168339517 | 168340192 | Pogk          | ENSMUSG000000040596 | -332 | 0.25 | 0.11 | 0.08 | 0.13 | 0.05 | 0.2  |
| chr10 | 53794435  | 53795971  | Man1a         | ENSMUSG00000003746  | 312  | 0.27 | 0.11 | 0.1  | 0.19 | 0.1  | 0.16 |
| chr10 | 119911975 | 119914666 | Hmga2         | ENSMUSG000000056758 | 28   | 0.27 | 0.09 | 0.13 | 0.16 | 0.09 | 0.16 |
| chr10 | 77068693  | 77069562  | Sumo3         | ENSMUSG000000020265 | 285  | 0.42 | 0.41 | 0.1  | 0.14 | 0.16 | 0.15 |
| chr11 | 105898089 | 105898638 | Dcaf7         | ENSMUSG000000049354 | 177  | 0.35 | 0.11 | 0.08 | 0.12 | 0.08 | 0.08 |
| chr11 | 105026124 | 105027610 | Gm11620       | ENSMUSG000000081965 | 1067 | 0.95 | 0.94 | 0.78 | 0.87 | 0.8  | 0.9  |
| chr11 | 121249067 | 121249552 | Rab40b        | ENSMUSG000000025170 | 70   | 0.43 | 0.18 | 0.09 | 0.16 | 0.11 | 0.17 |
| chr12 | 75008462  | 75009790  | Hif1a         | ENSMUSG000000021109 | 235  | 0.28 | 0.21 | 0.09 | 0.13 | 0.08 | 0.12 |
| chr12 | 40763913  | 40764811  | Arl4a         | ENSMUSG000000047446 | -408 | 0.39 | 0.3  | 0.08 | 0.19 | 0.13 | 0.1  |
| chr12 | 103942657 | 103943631 | Itpk1         | ENSMUSG000000057963 | -65  | 0.21 | 0.07 | 0.12 | 0.18 | 0.07 | 0.1  |
| chr12 | 60112617  | 60113274  | Sec23a        | ENSMUSG000000020986 | 59   | 0.39 | 0.26 | 0.12 | 0.28 | 0.1  | 0.14 |
| chr12 | 60231768  | 60232786  | Ctage5        | ENSMUSG000000021000 | 453  | 0.28 | 0.17 | 0.08 | 0.15 | 0.09 | 0.12 |
| chr13 | 108687841 | 108681654 | Zswim6        | ENSMUSG000000032846 | 61   | 0.21 | 0.1  | 0.1  | 0.1  | 0.06 | 0.11 |
| chr13 | 24853428  | 24854039  | Gmnn          | ENSMUSG000000006715 | -3   | 0.38 | 0.24 | 0.1  | 0.1  | 0.07 | 0.12 |
| chr13 | 49310916  | 49311757  | 1110007C09Rik | ENSMUSG000000037960 | -199 | 0.23 | 0.08 | 0.08 | 0.12 | 0.05 | 0.11 |
| chr13 | 9275651   | 9275931   | Dip2c         | ENSMUSG000000048264 | 17   | 0.33 | 0.35 | 0.09 | 0.12 | 0.11 | 0.13 |

|       |           |           |               |                    |       |      |      |      |      |      |      |
|-------|-----------|-----------|---------------|--------------------|-------|------|------|------|------|------|------|
| chr13 | 46058766  | 46060829  | Atxn1         | ENSMUSG00000046876 | 529   | 0.2  | 0.16 | 0.11 | 0.18 | 0.07 | 0.17 |
| chr13 | 96294253  | 96295390  | F2r11         | ENSMUSG00000021678 | 374   | 0.45 | 0.31 | 0.14 | 0.27 | 0.13 | 0.19 |
| chr14 | 46276780  | 46278103  | Ddhd1         | ENSMUSG00000037697 | -365  | 0.25 | 0.12 | 0.09 | 0.09 | 0.07 | 0.14 |
| chr14 | 14844947  | 14845641  | Atxn7         | ENSMUSG00000021738 | 289   | 0.37 | 0.16 | 0.12 | 0.14 | 0.16 | 0.14 |
| chr14 | 55530996  | 55531952  | Slc22a17      | ENSMUSG00000022199 | 253   | 0.3  | 0.15 | 0.11 | 0.14 | 0.11 | 0.13 |
| chr15 | 11925006  | 11925862  | Sub1          | ENSMUSG00000022205 | 71    | 0.37 | 0.21 | 0.11 | 0.13 | 0.09 | 0.16 |
| chr15 | 76307592  | 76308341  | Bop1          | ENSMUSG00000022557 | -288  | 0.29 | 0.1  | 0.09 | 0.12 | 0.11 | 0.12 |
| chr16 | 91010885  | 91011843  | Synj1         | ENSMUSG00000022973 | -59   | 0.36 | 0.15 | 0.08 | 0.13 | 0.08 | 0.14 |
| chr17 | 66425646  | 66426939  | Ankrd12       | ENSMUSG00000034647 | 70    | 0.25 | 0.14 | 0.09 | 0.13 | 0.08 | 0.1  |
| chr18 | 16966592  | 16968144  | Cdh2          | ENSMUSG00000024304 | -397  | 0.31 | 0.13 | 0.1  | 0.16 | 0.11 | 0.14 |
| chr19 | 54119545  | 54122174  | Adra2a        | ENSMUSG00000033717 | 1187  | 0.34 | 0.19 | 0.12 | 0.19 | 0.12 | 0.16 |
| chr19 | 45080296  | 45081313  | Peo1          | ENSMUSG00000025209 | 241   | 0.36 | 0.18 | 0.1  | 0.15 | 0.09 | 0.15 |
| chr2  | 154616416 | 154617899 | Raly          | ENSMUSG00000027593 | 325   | 0.39 | 0.12 | 0.08 | 0.17 | 0.09 | 0.11 |
| chr2  | 70499403  | 70500081  | Gorasp2       | ENSMUSG00000014959 | 109   | 0.22 | 0.09 | 0.1  | 0.12 | 0.07 | 0.08 |
| chr3  | 32716239  | 32716881  | Usp13         | ENSMUSG00000056900 | 92    | 0.28 | 0.1  | 0.09 | 0.11 | 0.06 | 0.13 |
| chr3  | 146475320 | 146476329 | Prkacb        | ENSMUSG0000005034  | 100   | 0.33 | 0.24 | 0.15 | 0.18 | 0.14 | 0.17 |
| chr4  | 146561384 | 146562062 | Gm13146       | ENSMUSG00000084002 | -94   | 0.79 | 0.72 | 0.76 | 0.76 | 0.55 | 0.7  |
| chr4  | 134408385 | 134410113 | Tmem57        | ENSMUSG00000028826 | -185  | 0.25 | 0.15 | 0.1  | 0.13 | 0.09 | 0.13 |
| chr4  | 124538911 | 124539689 | Maneal        | ENSMUSG00000042763 | 115   | 0.22 | 0.13 | 0.09 | 0.11 | 0.08 | 0.1  |
| chr4  | 100937136 | 100937926 | Jak1          | ENSMUSG00000028530 | 297   | 0.34 | 0.16 | 0.12 | 0.21 | 0.12 | 0.16 |
| chr4  | 146230587 | 146231025 | Gm13168       | ENSMUSG00000081460 | -154  | 0.29 | 0.26 | 0.26 | 0.43 | 0.07 | 0.09 |
| chr4  | 82505124  | 82505705  | Zdhhc21       | ENSMUSG00000028403 | 44    | 0.39 | 0.11 | 0.09 | 0.12 | 0.12 | 0.12 |
| chr5  | 120130416 | 120131026 | Tbx3          | ENSMUSG00000018604 | -39   | 0.32 | 0.13 | 0.12 | 0.15 | 0.08 | 0.14 |
| chr5  | 33773088  | 33778201  | Nkx1-1        | ENSMUSG00000029112 | -1800 | 0.24 | 0.19 | 0.12 | 0.16 | 0.1  | 0.15 |
| chr5  | 77286325  | 77287530  | C530008M17Rik | ENSMUSG00000036377 | -940  | 0.84 | 0.78 | 0.62 | 0.65 | 0.55 | 0.65 |
| chr5  | 100467391 | 100469341 | Hnrpd1        | ENSMUSG00000029328 | -478  | 0.23 | 0.18 | 0.1  | 0.16 | 0.08 | 0.14 |
| chr5  | 20560999  | 20561844  | Ptpn12        | ENSMUSG00000028771 | 122   | 0.39 | 0.28 | 0.09 | 0.17 | 0.1  | 0.16 |
| chr5  | 145118472 | 145119468 | Baiap211      | ENSMUSG00000038859 | 11    | 0.36 | 0.13 | 0.12 | 0.11 | 0.1  | 0.17 |
| chr5  | 73881798  | 73883875  | Dcun1d4       | ENSMUSG00000051674 | 571   | 0.35 | 0.21 | 0.12 | 0.19 | 0.13 | 0.18 |
| chr5  | 123299915 | 123300634 | Rnf34         | ENSMUSG00000029474 | 77    | 0.32 | 0.15 | 0.12 | 0.11 | 0.06 | 0.18 |

|       |           |           |               |                    |      |      |      |      |      |      |      |
|-------|-----------|-----------|---------------|--------------------|------|------|------|------|------|------|------|
| chr5  | 77017619  | 77018221  | Cep135        | ENSMUSG00000036403 | 197  | 0.33 | 0.28 | 0.11 | 0.11 | 0.12 | 0.12 |
| chr6  | 66485123  | 66485713  | Mad211        | ENSMUSG00000029910 | 34   | 0.46 | 0.23 | 0.12 | 0.17 | 0.17 | 0.14 |
| chr7  | 69608470  | 69609420  | Peg12         | ENSMUSG00000070526 | 451  | 0.39 | 0.25 | 0.31 | 0.28 | 0.19 | 0.26 |
| chr7  | 91299619  | 91300834  | Fam108c       | ENSMUSG00000038459 | 177  | 0.23 | 0.11 | 0.09 | 0.14 | 0.11 | 0.13 |
| chr9  | 31720432  | 31722817  | Barx2         | ENSMUSG00000032033 | -577 | 0.25 | 0.08 | 0.13 | 0.13 | 0.07 | 0.2  |
| chr9  | 59333525  | 59334845  | Arih1         | ENSMUSG00000025234 | -322 | 0.35 | 0.2  | 0.1  | 0.15 | 0.17 | 0.14 |
| chr11 | 58775297  | 58775717  | Gm12260       | ENSMUSG00000080152 | 193  | 0.83 | 0.37 | 0.72 | 0.87 | 0.25 | 0.66 |
| chr11 | 84333674  | 84334015  | Lhx1          | ENSMUSG00000018698 | 1725 | 0.6  | 0.3  | 0.16 | 0.26 | 0.2  | 0.33 |
| chr11 | 70043843  | 70044162  | Bcl6b         | ENSMUSG00000000317 | -702 | 0.55 | 0.24 | 0.1  | 0.16 | 0.12 | 0.17 |
| chr13 | 69948718  | 69949099  | Med10         | ENSMUSG00000021598 | 148  | 0.57 | 0.11 | 0.08 | 0.14 | 0.13 | 0.11 |
| chr14 | 31438562  | 31439518  | Prkcd         | ENSMUSG00000021948 | 318  | 0.66 | 0.13 | 0.11 | 0.16 | 0.09 | 0.2  |
| chr14 | 58617707  | 58618246  | Efha1         | ENSMUSG00000021973 | 123  | 0.43 | 0.22 | 0.09 | 0.12 | 0.09 | 0.15 |
| chr14 | 45838993  | 45840165  | Txndc16       | ENSMUSG00000021830 | -540 | 0.62 | 0.17 | 0.15 | 0.18 | 0.15 | 0.12 |
| chr15 | 81877410  | 81878079  | Nhp211        | ENSMUSG00000063480 | 221  | 0.52 | 0.25 | 0.11 | 0.13 | 0.07 | 0.16 |
| chr15 | 79435316  | 79435549  | Dmc1          | ENSMUSG00000022429 | 82   | 0.7  | 0.38 | 0.11 | 0.34 | 0.34 | 0.17 |
| chr15 | 58046034  | 58046641  | Fbxo32        | ENSMUSG00000022358 | 96   | 0.52 | 0.14 | 0.1  | 0.17 | 0.07 | 0.15 |
| chr16 | 11134169  | 11135061  | Txndc11       | ENSMUSG00000022498 | 31   | 0.53 | 0.22 | 0.1  | 0.15 | 0.18 | 0.13 |
| chr17 | 35496048  | 35496609  | H2-Q3         | ENSMUSG00000092253 | 394  | 0.57 | 0.12 | 0.17 | 0.17 | 0.1  | 0.21 |
| chr17 | 31523224  | 31523587  | Pde9a         | ENSMUSG00000041119 | 166  | 0.72 | 1    | 0.08 | 0.28 | 0.16 | 0.14 |
| chr18 | 89938536  | 89938990  | Dok6          | ENSMUSG00000073514 | 157  | 0.57 | 0.25 | 0.09 | 0.15 | 0.1  | 0.13 |
| chr18 | 62071166  | 62071548  | Ablim3        | ENSMUSG00000032735 | 121  | 0.39 | 0.12 | 0.08 | 0.15 | 0.05 | 0.15 |
| chr18 | 58818883  | 58819584  | Isoc1         | ENSMUSG00000024601 | 97   | 0.6  | 0.16 | 0.11 | 0.14 | 0.07 | 0.15 |
| chr19 | 8845454   | 8845812   | Tmem223       | ENSMUSG00000075043 | 147  | 0.56 | 0.12 | 0.15 | 0.32 | 0.12 | 0.23 |
| chr19 | 36131091  | 36132271  | Htr7          | ENSMUSG00000024798 | 149  | 0.76 | 0.5  | 0.19 | 0.28 | 0.24 | 0.22 |
| chr2  | 150326257 | 150326645 | Gm14121       | ENSMUSG00000083325 | 130  | 0.81 | 0.43 | 0.3  | 0.6  | 0.28 | 0.37 |
| chr2  | 93173759  | 93174663  | Tspan18       | ENSMUSG00000027217 | 396  | 0.42 | 0.22 | 0.12 | 0.13 | 0.09 | 0.12 |
| chr2  | 117075410 | 117075922 | Fam98b        | ENSMUSG00000027349 | 191  | 0.71 | 0.54 | 0.19 | 0.2  | 0.18 | 0.3  |
| chr2  | 106814344 | 106814585 | 2700007P21Rik | ENSMUSG00000027122 | 90   | 0.58 | 0.06 | 0.11 | 0.2  | 0.07 | 0.13 |
| chr2  | 32237022  | 32237709  | 1110008P14Rik | ENSMUSG00000039195 | 17   | 0.59 | 0.14 | 0.07 | 0.16 | 0.18 | 0.13 |
| chr2  | 164859547 | 164860534 | Ncoa5         | ENSMUSG00000039804 | 247  | 0.52 | 0.2  | 0.15 | 0.19 | 0.19 | 0.2  |

|       |           |           |               |                    |      |      |      |      |      |      |      |
|-------|-----------|-----------|---------------|--------------------|------|------|------|------|------|------|------|
| chr3  | 32428301  | 32428763  | Mfn1          | ENSMUSG00000027668 | 145  | 0.68 | 0.21 | 0.12 | 0.2  | 0.19 | 0.19 |
| chr4  | 19968949  | 19969510  | Ggh           | ENSMUSG00000073987 | 30   | 0.6  | 0.13 | 0.12 | 0.15 | 0.07 | 0.13 |
| chr4  | 48057606  | 48058597  | Nr4a3         | ENSMUSG00000028341 | 76   | 0.48 | 0.35 | 0.09 | 0.14 | 0.12 | 0.18 |
| chr5  | 93634791  | 93635865  | Ccni          | ENSMUSG00000063015 | -375 | 0.48 | 0.14 | 0.07 | 0.17 | 0.1  | 0.16 |
| chr6  | 127984347 | 127985125 | Tspan9        | ENSMUSG00000030352 | -126 | 0.4  | 0.1  | 0.12 | 0.18 | 0.06 | 0.18 |
| chr6  | 14851455  | 14851980  | Foxp2         | ENSMUSG00000029563 | 240  | 0.48 | 0.67 | 0.19 | 0.15 | 0.05 | 0.15 |
| chr6  | 137200855 | 137201420 | Ptpro         | ENSMUSG00000030223 | 317  | 0.41 | 0.19 | 0.1  | 0.09 | 0.05 | 0.1  |
| chr6  | 85075986  | 85076187  | Gm5878        | ENSMUSG00000072952 | 33   | 0.7  | 0.57 | 0.11 | 0.13 | 0.32 | 0.13 |
| chr8  | 124956495 | 124956869 | Cyba          | ENSMUSG00000006519 | 126  | 0.6  | 0.3  | 0.15 | 0.16 | 0.12 | 0.35 |
| chr9  | 98886597  | 98887305  | Faim          | ENSMUSG00000032463 | 159  | 0.53 | 0.1  | 0.09 | 0.18 | 0.07 | 0.17 |
| chr9  | 44728453  | 44728809  | Atp5l         | ENSMUSG00000038717 | 194  | 0.52 | 0.18 | 0.14 | 0.14 | 0.19 | 0.19 |
| chr9  | 72380149  | 72380455  | Rfx7          | ENSMUSG00000037674 | -114 | 0.6  | 0.16 | 0.15 | 0.12 | 0.08 | 0.12 |
| chr10 | 105010496 | 105011506 | Gm15663       | ENSMUSG00000085282 | -8   | 0.75 | 0.47 | 0.19 | 0.23 | 0.09 | 0.15 |
| chr11 | 102786113 | 102786588 | Kif18b        | ENSMUSG00000051378 | 52   | 1    | 0.32 | 0.11 | 0.21 | 0.13 | 0.22 |
| chr11 | 61770239  | 61770873  | Specc1        | ENSMUSG00000042331 | 275  | 1    | 0.24 | 0.31 | 0.07 | 0.07 | 0.1  |
| chr17 | 64680714  | 64681639  | CT010479.2    | ENSMUSG00000092824 | -29  | 0.74 | 0.12 | 0.08 | 0.09 | 0.09 | 0.16 |
| chr18 | 69505681  | 69506159  | Tcf4          | ENSMUSG00000053477 | 63   | 0.85 | 0.2  | 0.09 | 0.14 | 0.08 | 0.1  |
| chr18 | 67503609  | 67503836  | B430212C06Rik | ENSMUSG00000046415 | 35   | 0.9  | 0.68 | 0.07 | 0.21 | 0.09 | 0.18 |
| chr2  | 180869332 | 180869916 | Kcnq2         | ENSMUSG00000016346 | 3    | 0.89 | 0.31 | 0.1  | 0.19 | 0.11 | 0.14 |
| chr2  | 125608234 | 125608648 | Secisbp2l     | ENSMUSG00000035093 | 165  | 0.89 | 0.34 | 0.13 | 0.22 | 0.17 | 0.15 |
| chr3  | 108247677 | 108248190 | Sars          | ENSMUSG00000068739 | 128  | 0.95 | 0.39 | 0.21 | 0.5  | 0.24 | 0.28 |
| chr4  | 40800543  | 40801637  | B4galt1       | ENSMUSG00000028413 | -52  | 0.8  | 0.2  | 0.13 | 0.2  | 0.14 | 0.23 |
| chr4  | 33037466  | 33038054  | Ankrd6        | ENSMUSG00000040183 | 41   | 0.75 | 0.19 | 0.12 | 0.16 | 0.08 | 0.12 |
| chr7  | 28954605  | 28955236  | Fbl           | ENSMUSG00000046865 | 155  | 1    | 0.07 | 0.07 | 0.12 | 0.05 | 0.1  |
| chr11 | 98656068  | 98657789  | Msl1          | ENSMUSG00000052915 | 98   | 0.09 | 0.22 | 0.11 | 0.13 | 0.33 | 0.14 |
| chr8  | 125856539 | 125857055 | Spire2        | ENSMUSG00000010154 | 184  | 0.07 | 0.18 | 0.09 | 0.16 | 0.39 | 0.15 |
| chr15 | 88990868  | 88991540  | Plxnb2        | ENSMUSG00000036606 | 773  | 0.45 | 0.62 | 0.66 | 0.71 | 0.92 | 0.87 |
| chr19 | 56900646  | 56901012  | Tdrd1         | ENSMUSG00000025081 | 130  | 0.18 | 0.85 | 0.74 | 0.83 | 0.71 | 0.71 |
| chr7  | 19979387  | 19979661  | Ercc2         | ENSMUSG00000030400 | 514  | 0.28 | 0.27 | 0.78 | 0.75 | 0.87 | 0.9  |
| chr2  | 42508372  | 42508661  | Lrp1b         | ENSMUSG00000049252 | 19   | 0.06 | 0.2  | 0.08 | 0.09 | 0.79 | 0.15 |

|      |           |           |               |                     |      |      |      |      |      |      |      |
|------|-----------|-----------|---------------|---------------------|------|------|------|------|------|------|------|
| chr8 | 4275696   | 4275947   | Timm44        | ENSMUSG00000002949  | 50   | 0.07 | 0.43 | 0.27 | 0.3  | 1    | 0.25 |
| chr1 | 75500297  | 75500536  | Obsl1         | ENSMUSG000000026211 | -161 | 0.35 | 0.4  | 0.75 | 0.77 | 0.72 | 0.74 |
| chr1 | 122017494 | 122017857 | Dbi           | ENSMUSG000000026385 | -179 | 1    | 0.09 | 0.12 | 0.13 | 0.11 | 0.17 |
| chr1 | 161161912 | 161162667 | Rfwd2         | ENSMUSG000000040782 | -168 | 0.11 | 0.2  | 0.08 | 0.14 | 0.61 | 0.14 |
| chr1 | 24685355  | 24685922  | Lmbrd1        | ENSMUSG000000073725 | 255  | 0.61 | 0.28 | 0.15 | 0.12 | 0.06 | 0.18 |
| chr1 | 33964302  | 33964538  | Bend6         | ENSMUSG000000042182 | 184  | 1    | 1    | 0.15 | 0.14 | 0.11 | 0.09 |
| chr1 | 183282508 | 183283038 | Cnih3         | ENSMUSG000000026514 | 14   | 0.65 | 0.38 | 0.2  | 0.21 | 0.17 | 0.31 |
| chr1 | 155033065 | 155033417 | Lamc2         | ENSMUSG000000026479 | 336  | 0.58 | 0.18 | 0.13 | 0.2  | 0.16 | 0.14 |
| chr1 | 89083149  | 89083802  | Prss56        | ENSMUSG000000036480 | 235  | 0.55 | 0.08 | 0.09 | 0.13 | 0.11 | 0.12 |
| chr1 | 167637914 | 167638190 | Rcsd1         | ENSMUSG000000040723 | 173  | 0.11 | 0.12 | 0.1  | 0.12 | 0.45 | 0.14 |
| chr1 | 171899076 | 171899562 | Hsd17b7       | ENSMUSG000000026675 | 53   | 0.29 | 0.11 | 0.12 | 0.18 | 0.1  | 0.14 |
| chr1 | 168168628 | 168169096 | Mael          | ENSMUSG000000040629 | 13   | 0.96 | 0.96 | 0.9  | 0.98 | 0.84 | 0.93 |
| chr1 | 91350943  | 91352450  | Agap1         | ENSMUSG000000055013 | 315  | 0.19 | 0.11 | 0.1  | 0.15 | 0.11 | 0.12 |
| chr1 | 182780651 | 182781442 | BC031781      | ENSMUSG000000038806 | -236 | 0.39 | 0.25 | 0.1  | 0.12 | 0.11 | 0.12 |
| chr1 | 164670102 | 164670804 | Prrc2c        | ENSMUSG000000040225 | 228  | 0.38 | 0.39 | 0.13 | 0.2  | 0.09 | 0.2  |
| chr1 | 153191355 | 153192554 | Ivns1abp      | ENSMUSG000000023150 | 326  | 0.24 | 0.14 | 0.09 | 0.18 | 0.11 | 0.11 |
| chr1 | 21951084  | 21952205  | Kcnq5         | ENSMUSG000000028033 | 18   | 0.39 | 0.19 | 0.09 | 0.17 | 0.17 | 0.17 |
| chr1 | 95341508  | 95342343  | Hdlbp         | ENSMUSG000000034088 | 338  | 0.19 | 0.11 | 0.12 | 0.11 | 0.09 | 0.16 |
| chr1 | 157405277 | 157405924 | Acbd6         | ENSMUSG000000033701 | 341  | 0.15 | 0.08 | 0.09 | 0.13 | 0.05 | 0.17 |
| chr1 | 59538795  | 59540781  | Fzd7          | ENSMUSG000000041075 | 797  | 0.05 | 0.09 | 0.1  | 0.14 | 0.15 | 0.13 |
| chr1 | 138027852 | 138028503 | Kif21b        | ENSMUSG000000041642 | 211  | 0.16 | 0.15 | 0.1  | 0.17 | 0.06 | 0.14 |
| chr1 | 39534968  | 39535842  | Tbc1d8        | ENSMUSG000000003134 | 187  | 0.46 | 0.31 | 0.17 | 0.13 | 0.21 | 0.19 |
| chr1 | 182867112 | 182867323 | Lefty1        | ENSMUSG000000038793 | 215  | 0.21 | 0.13 | 0.17 | 0.12 | 0.06 | 0.2  |
| chr1 | 94807087  | 94808104  | 5033417F24Rik | ENSMUSG000000091828 | -254 | 0.13 | 0.1  | 0.08 | 0.13 | 0.06 | 0.11 |
| chr1 | 108692819 | 108693358 | Vps4b         | ENSMUSG000000009907 | 66   | 0.47 | 0.16 | 0.11 | 0.16 | 0.11 | 0.09 |
| chr1 | 54982569  | 54983461  | Ankrd44       | ENSMUSG000000052331 | 216  | 0.18 | 0.09 | 0.13 | 0.13 | 0.09 | 0.16 |
| chr1 | 167931596 | 167933716 | Pou2f1        | ENSMUSG000000026565 | 84   | 0.21 | 0.22 | 0.13 | 0.16 | 0.12 | 0.13 |
| chr1 | 181889651 | 181890700 | Cdc42bpa      | ENSMUSG000000026490 | -428 | 0.26 | 0.24 | 0.1  | 0.12 | 0.12 | 0.12 |
| chr1 | 157005678 | 157006410 | Stx6          | ENSMUSG000000026470 | 211  | 0.28 | 0.13 | 0.09 | 0.15 | 0.13 | 0.12 |
| chr1 | 138311799 | 138312255 | Ddx59         | ENSMUSG000000026404 | 179  | 0.05 | 0.12 | 0.09 | 0.13 | 0.13 | 0.11 |

|      |           |           |               |                     |      |      |      |      |      |      |      |
|------|-----------|-----------|---------------|---------------------|------|------|------|------|------|------|------|
| chr1 | 31005671  | 31007061  | Ptp4a1        | ENSMUSG00000026064  | -213 | 0.11 | 0.12 | 0.11 | 0.14 | 0.04 | 0.12 |
| chr1 | 167564246 | 167564918 | Mpzl1         | ENSMUSG00000026566  | 90   | 0.11 | 0.06 | 0.07 | 0.11 | 0.04 | 0.11 |
| chr1 | 182570898 | 182572012 | Lin9          | ENSMUSG00000058729  | -43  | 0.15 | 0.1  | 0.12 | 0.12 | 0.09 | 0.12 |
| chr1 | 137180108 | 137180699 | Rnpep         | ENSMUSG00000041926  | 258  | 0.17 | 0.11 | 0.08 | 0.18 | 0.07 | 0.16 |
| chr1 | 38683638  | 38684929  | Aff3          | ENSMUSG00000037138  | -253 | 0.15 | 0.12 | 0.09 | 0.14 | 0.07 | 0.16 |
| chr1 | 88199715  | 88200559  | B3gnt7        | ENSMUSG00000079445  | 341  | 0.07 | 0.09 | 0.09 | 0.14 | 0.14 | 0.15 |
| chr1 | 158488627 | 158489569 | Abl2          | ENSMUSG00000026596  | 181  | 0.46 | 0.14 | 0.14 | 0.25 | 0.22 | 0.15 |
| chr1 | 58768286  | 58768608  | Cflar         | ENSMUSG00000026031  | 95   | 0.08 | 0.19 | 0.11 | 0.09 | 0.18 | 0.14 |
| chr1 | 52783635  | 52784373  | Mfsd6         | ENSMUSG00000041439  | 158  | 0.2  | 0.19 | 0.12 | 0.15 | 0.11 | 0.11 |
| chr1 | 9535350   | 9536349   | Rrs1          | ENSMUSG00000061024  | 360  | 0.11 | 0.22 | 0.17 | 0.21 | 0.2  | 0.18 |
| chr1 | 135975384 | 135976015 | Btg2          | ENSMUSG00000020423  | -2   | 0.35 | 0.09 | 0.11 | 0.21 | 0.09 | 0.13 |
| chr1 | 75232994  | 75233535  | Dnajb2        | ENSMUSG00000026203  | 224  | 0.11 | 0.09 | 0.08 | 0.11 | 0.35 | 0.15 |
| chr1 | 95698267  | 95698755  | Dtymk         | ENSMUSG00000026281  | -28  | 0.23 | 0.11 | 0.12 | 0.19 | 0.08 | 0.16 |
| chr1 | 158134813 | 158135215 | Fam163a       | ENSMUSG00000015484  | 142  | 0.3  | 0.24 | 0.2  | 0.24 | 0.17 | 0.16 |
| chr1 | 39044344  | 39044897  | Pdcl3         | ENSMUSG00000026078  | -39  | 0.19 | 0.2  | 0.1  | 0.12 | 0.1  | 0.15 |
| chr1 | 107560403 | 107561224 | 2310035C23Rik | ENSMUSG00000026319  | 375  | 0.5  | 0.17 | 0.11 | 0.23 | 0.15 | 0.16 |
| chr1 | 66514596  | 66515197  | Unc80         | ENSMUSG00000055567  | -45  | 0.13 | 0.18 | 0.1  | 0.18 | 0.06 | 0.09 |
| chr1 | 74647668  | 74648033  | Rnf25         | ENSMUSG00000026171  | 69   | 0.19 | 0.11 | 0.1  | 0.22 | 1    | 0.18 |
| chr1 | 93391041  | 93391486  | Traf3ip1      | ENSMUSG00000034292  | 18   | 0.17 | 0.1  | 0.09 | 0.1  | 0.08 | 0.11 |
| chr1 | 98768721  | 98769006  | Slco4c1       | ENSMUSG00000040693  | -115 | 0.45 | 0.3  | 0.16 | 0.29 | 0.17 | 0.14 |
| chr1 | 172994070 | 172996091 | Fcgr3         | ENSMUSG00000059498  | -14  | 0.06 | 0.02 | 0.08 | 0.1  | 0.02 | 0.09 |
| chr1 | 174012670 | 174013290 | Copa          | ENSMUSG00000026553  | 206  | 0.29 | 0.86 | 0.13 | 0.19 | 0.09 | 0.22 |
| chr1 | 39250263  | 39251280  | Npas2         | ENSMUSG00000026077  | 195  | 0.22 | 0.26 | 0.14 | 0.22 | 0.1  | 0.16 |
| chr1 | 46909541  | 46910898  | Slc39a10      | ENSMUSG00000025986  | 672  | 0.13 | 0.09 | 0.07 | 0.12 | 0.07 | 0.11 |
| chr1 | 140752877 | 140753398 | 2310009B15Rik | ENSMUSG00000079283  | 294  | 0.87 | 0.2  | 0.11 | 0.22 | 0.33 | 0.11 |
| chr1 | 180248338 | 180249442 | B230369F24Rik | ENSMUSG000000086350 | -210 | 0.21 | 0.15 | 0.12 | 0.15 | 0.09 | 0.17 |
| chr1 | 193541613 | 193543014 | Lpgat1        | ENSMUSG00000026623  | 600  | 0.21 | 0.15 | 0.09 | 0.12 | 0.11 | 0.11 |
| chr1 | 74930875  | 74932187  | Fev           | ENSMUSG00000055197  | -349 | 0.29 | 0.14 | 0.14 | 0.19 | 0.12 | 0.2  |
| chr1 | 134942555 | 134943286 | Pik3c2b       | ENSMUSG00000026447  | 331  | 0.12 | 0.09 | 0.1  | 0.13 | 0.24 | 0.09 |
| chr1 | 38185893  | 38187053  | Rev1          | ENSMUSG00000026082  | 34   | 0.08 | 0.13 | 0.09 | 0.15 | 0.16 | 0.12 |

|      |           |           |               |                     |      |      |      |      |      |      |      |
|------|-----------|-----------|---------------|---------------------|------|------|------|------|------|------|------|
| chr1 | 94728263  | 94729442  | Gpc1          | ENSMUSG00000034220  | 630  | 0.12 | 0.1  | 0.1  | 0.09 | 0.07 | 0.11 |
| chr1 | 57434318  | 57434863  | 4930558J18Rik | ENSMUSG000000084958 | -242 | 0.13 | 0.14 | 0.1  | 0.14 | 0.07 | 0.08 |
| chr1 | 192752326 | 192752853 | Angel2        | ENSMUSG000000026634 | 220  | 0.17 | 0.08 | 0.14 | 0.12 | 0.07 | 0.1  |
| chr1 | 138156346 | 138157491 | Gpr25         | ENSMUSG000000052759 | 532  | 0.16 | 0.14 | 0.14 | 0.12 | 0.29 | 0.13 |
| chr1 | 79668149  | 79668512  | Ap1s3         | ENSMUSG000000054702 | 210  | 0.1  | 0.12 | 0.12 | 0.19 | 0.03 | 0.24 |
| chr1 | 129999856 | 130000557 | R3hdm1        | ENSMUSG000000056211 | 323  | 0.1  | 0.09 | 0.18 | 0.16 | 0.24 | 0.13 |
| chr1 | 64781421  | 64784553  | Fzd5          | ENSMUSG000000045005 | 1337 | 0.24 | 0.24 | 0.11 | 0.17 | 0.16 | 0.14 |
| chr1 | 121970256 | 121970508 | Tmem37        | ENSMUSG000000050777 | 269  | 1    | 1    | 0.11 | 0.15 | 0.09 | 0.12 |
| chr1 | 37486622  | 37487260  | 6330578E17Rik | ENSMUSG000000026112 | 7    | 0.38 | 0.22 | 0.09 | 0.1  | 0.09 | 0.16 |
| chr1 | 74818260  | 74818783  | Wnt6          | ENSMUSG000000033227 | 55   | 0.08 | 0.17 | 0.09 | 0.13 | 0.23 | 0.11 |
| chr1 | 172797643 | 172797989 | Atf6          | ENSMUSG000000026663 | 86   | 0.11 | 0.19 | 0.12 | 0.28 | 0.26 | 0.32 |
| chr1 | 184447129 | 184447951 | Capn2         | ENSMUSG000000026509 | 48   | 0.11 | 0.14 | 0.1  | 0.13 | 0.19 | 0.1  |
| chr1 | 74708246  | 74708738  | Ttli4         | ENSMUSG000000033257 | 173  | 0.5  | 0.32 | 0.11 | 0.14 | 0.2  | 0.13 |
| chr1 | 38892646  | 38893621  | Lonrf2        | ENSMUSG000000048814 | -198 | 0.09 | 0.08 | 0.07 | 0.11 | 0.14 | 0.11 |
| chr1 | 74379023  | 74379398  | Pnkd          | ENSMUSG000000026179 | 26   | 0.19 | 0.15 | 0.11 | 0.13 | 0.06 | 0.24 |
| chr1 | 55083717  | 55084449  | Sf3b1         | ENSMUSG000000025982 | 239  | 0.25 | 0.2  | 0.13 | 0.16 | 0.11 | 0.22 |
| chr1 | 15276499  | 15277259  | Kcnb2         | ENSMUSG000000092083 | -461 | 0.33 | 0.24 | 0.16 | 0.15 | 0.19 | 0.13 |
| chr1 | 66863010  | 66864441  | 1110028C15Rik | ENSMUSG000000026004 | 395  | 0.09 | 0.08 | 0.1  | 0.12 | 0.05 | 0.09 |
| chr1 | 55462426  | 55463492  | Plcl1         | ENSMUSG000000038349 | -273 | 0.18 | 0.13 | 0.1  | 0.17 | 0.09 | 0.11 |
| chr1 | 95531678  | 95532555  | Stk25         | ENSMUSG000000026277 | -60  | 0.11 | 0.07 | 0.1  | 0.15 | 0.05 | 0.15 |
| chr1 | 64578941  | 64580312  | Creb1         | ENSMUSG000000025958 | 248  | 0.15 | 0.12 | 0.1  | 0.13 | 0.09 | 0.16 |
| chr1 | 137715085 | 137715585 | Lad1          | ENSMUSG000000041782 | 160  | 0.07 | 0.22 | 0.11 | 0.25 | 0.2  | 0.15 |
| chr1 | 134195135 | 134195846 | Klhdc8a       | ENSMUSG000000042115 | 287  | 0.08 | 0.16 | 0.1  | 0.11 | 0.13 | 0.15 |
| chr1 | 155334111 | 155334908 | Dhx9          | ENSMUSG000000042699 | 281  | 0.5  | 0.2  | 0.12 | 0.14 | 0.2  | 0.14 |
| chr1 | 184338793 | 184339742 | Gm10517       | ENSMUSG000000073482 | -116 | 0.25 | 0.21 | 0.12 | 0.15 | 0.17 | 0.17 |
| chr1 | 145851259 | 145851639 | Rgs2          | ENSMUSG000000026360 | -184 | 0.75 | 0.33 | 0.11 | 0.21 | 0.2  | 0.26 |
| chr1 | 87689902  | 87691066  | Cab39         | ENSMUSG000000036707 | 468  | 0.31 | 0.15 | 0.16 | 0.17 | 0.18 | 0.13 |
| chr1 | 134125580 | 134125957 | Gm10188       | ENSMUSG000000066936 | 576  | 0.62 | 0.73 | 0.95 | 0.85 | 0.86 | 0.97 |
| chr1 | 176431860 | 176432671 | Fmn2          | ENSMUSG000000028354 | 309  | 0.11 | 0.11 | 0.21 | 0.19 | 1    | 0.21 |
| chr1 | 52874050  | 52874706  | Inpp1         | ENSMUSG000000026102 | -83  | 0.19 | 0.17 | 0.13 | 0.16 | 0.09 | 0.13 |



|      |           |           |               |                     |      |      |      |      |      |      |      |
|------|-----------|-----------|---------------|---------------------|------|------|------|------|------|------|------|
| chr1 | 193730475 | 193731576 | Slc30a1       | ENSMUSG000000037434 | 379  | 0.13 | 0.23 | 0.08 | 0.16 | 0.24 | 0.16 |
| chr1 | 38053791  | 38054304  | Txndc9        | ENSMUSG000000058407 | 4    | 0.17 | 0.17 | 0.14 | 0.14 | 0.07 | 0.13 |
| chr1 | 129573805 | 129574714 | Tmem163       | ENSMUSG000000026347 | 414  | 0.3  | 0.18 | 0.1  | 0.1  | 0.15 | 0.16 |
| chr1 | 153936746 | 153937458 | 1700025G04Rik | ENSMUSG000000032666 | 348  | 0.11 | 0.1  | 0.08 | 0.11 | 0.22 | 0.2  |
| chr1 | 168930722 | 168931994 | Gm16701       | ENSMUSG000000086622 | -386 | 0.09 | 0.17 | 0.1  | 0.15 | 0.13 | 0.14 |
| chr1 | 60466122  | 60467095  | Abi2          | ENSMUSG000000026782 | 69   | 0.28 | 0.21 | 0.14 | 0.15 | 0.14 | 0.14 |
| chr1 | 23928558  | 23929393  | Smap1         | ENSMUSG000000026155 | 181  | 0.12 | 0.14 | 0.07 | 0.11 | 0.08 | 0.1  |
| chr1 | 178743499 | 178744854 | Cep170        | ENSMUSG000000057335 | 22   | 0.08 | 0.06 | 0.14 | 0.14 | 0.24 | 0.17 |
| chr1 | 171461420 | 171461730 | Nuf2          | ENSMUSG000000026683 | -16  | 0.07 | 0.11 | 0.07 | 0.27 | 0.24 | 0.25 |
| chr1 | 178204764 | 178205703 | Pld5          | ENSMUSG000000055214 | 172  | 0.27 | 0.34 | 0.14 | 0.19 | 0.12 | 0.18 |
| chr1 | 182742623 | 182744487 | H3f3a         | ENSMUSG000000060743 | 110  | 0.07 | 0.07 | 0.1  | 0.14 | 0.11 | 0.14 |
| chr1 | 136311825 | 136312536 | Adipor1       | ENSMUSG000000026457 | 225  | 0.06 | 0.06 | 0.08 | 0.1  | 0.11 | 0.11 |
| chr1 | 153418443 | 153418885 | Fam129a       | ENSMUSG000000026483 | 161  | 0.21 | 0.17 | 0.11 | 0.2  | 0.1  | 0.13 |
| chr1 | 167124042 | 167124706 | Sft2d2        | ENSMUSG000000040848 | 190  | 0.27 | 0.17 | 0.14 | 0.15 | 0.16 | 0.14 |
| chr1 | 157882662 | 157883516 | Tor1aip2      | ENSMUSG000000079252 | 233  | 0.37 | 0.2  | 0.08 | 0.2  | 0.22 | 0.14 |
| chr1 | 164478395 | 164478840 | Mettl13       | ENSMUSG000000026694 | 36   | 0.74 | 0.14 | 0.1  | 0.2  | 0.32 | 0.15 |
| chr1 | 136456657 | 136458321 | Kdm5b         | ENSMUSG000000042207 | 741  | 0.12 | 0.2  | 0.11 | 0.19 | 0.18 | 0.14 |
| chr1 | 196802467 | 196803025 | A330023F24Rik | ENSMUSG000000073474 | 177  | 0.14 | 0.12 | 0.16 | 0.14 | 0.07 | 0.12 |
| chr1 | 10222224  | 10223509  | Arfgef1       | ENSMUSG000000067851 | -115 | 0.28 | 0.22 | 0.1  | 0.18 | 0.19 | 0.12 |
| chr1 | 159341917 | 159342960 | Rasal2        | ENSMUSG000000070565 | -373 | 0.17 | 0.14 | 0.12 | 0.12 | 0.11 | 0.14 |
| chr1 | 13650312  | 13650813  | Lactb2        | ENSMUSG000000025937 | 65   | 0.07 | 0.07 | 0.13 | 0.16 | 0.12 | 0.12 |
| chr1 | 158869093 | 158870138 | Ralgps2       | ENSMUSG000000026594 | -97  | 0.25 | 0.18 | 0.11 | 0.18 | 0.18 | 0.12 |
| chr1 | 74552035  | 74553393  | Rqcd1         | ENSMUSG000000026174 | 82   | 0.27 | 0.21 | 0.1  | 0.19 | 0.16 | 0.11 |
| chr1 | 5906509   | 5907555   | Npbwr1        | ENSMUSG000000033774 | 447  | 0.25 | 0.28 | 0.23 | 0.36 | 0.08 | 0.16 |
| chr1 | 89160781  | 89161531  | Efh1          | ENSMUSG000000026255 | 218  | 0.2  | 0.18 | 0.11 | 0.13 | 0.11 | 0.16 |
| chr1 | 133049602 | 133049906 | Eif2d         | ENSMUSG000000026427 | -4   | 0.07 | 0.38 | 0.11 | 0.23 | 0.2  | 0.2  |
| chr1 | 165859915 | 165860542 | Scyl3         | ENSMUSG000000026584 | 307  | 0.1  | 0.08 | 0.09 | 0.1  | 0.05 | 0.09 |
| chr1 | 180206228 | 180206716 | 4930527J03Rik | ENSMUSG000000070489 | 298  | 0.11 | 0.08 | 0.13 | 0.09 | 0.06 | 0.09 |
| chr1 | 184212225 | 184213002 | Degs1         | ENSMUSG000000038633 | -258 | 0.21 | 0.27 | 0.11 | 0.15 | 0.13 | 0.13 |
| chr1 | 43884159  | 43884980  | Uxs1          | ENSMUSG000000057363 | 17   | 0.33 | 0.11 | 0.17 | 0.19 | 0.11 | 0.12 |

|      |           |           |               |                    |      |      |      |      |      |      |      |
|------|-----------|-----------|---------------|--------------------|------|------|------|------|------|------|------|
| chr1 | 65225478  | 65225947  | Idh1          | ENSMUSG00000025950 | 4    | 0.33 | 0.61 | 0.12 | 0.14 | 1    | 0.17 |
| chr1 | 77510924  | 77512028  | Epha4         | ENSMUSG00000026235 | 187  | 0.16 | 0.31 | 0.1  | 0.19 | 0.31 | 0.17 |
| chr1 | 63492289  | 63493103  | Adam23        | ENSMUSG00000025964 | 231  | 0.25 | 0.26 | 0.13 | 0.24 | 0.17 | 0.15 |
| chr1 | 128389274 | 128389517 | Nckap5        | ENSMUSG00000049690 | -76  | 0.12 | 0.11 | 0.16 | 0.2  | 0.5  | 0.17 |
| chr1 | 53409308  | 53409621  | Asnsd1        | ENSMUSG00000026095 | -50  | 0.07 | 0.08 | 0.07 | 0.15 | 0.21 | 0.13 |
| chr1 | 121400999 | 121401574 | Ralb          | ENSMUSG00000004451 | 85   | 0.19 | 0.13 | 0.12 | 0.15 | 0.1  | 0.15 |
| chr1 | 132993386 | 132994424 | Mapkapk2      | ENSMUSG00000016528 | 239  | 0.21 | 0.15 | 0.13 | 0.23 | 0.15 | 0.17 |
| chr1 | 194979063 | 194979606 | Irf6          | ENSMUSG00000026638 | 28   | 0.18 | 0.15 | 0.19 | 0.27 | 0.1  | 0.16 |
| chr1 | 84692073  | 84692320  | Mir5126       | ENSMUSG00000093254 | -218 | 0.47 | 0.16 | 0.08 | 0.23 | 0.18 | 0.16 |
| chr1 | 88255186  | 88256582  | Ncl           | ENSMUSG00000026234 | 146  | 0.19 | 0.15 | 0.12 | 0.17 | 0.09 | 0.16 |
| chr1 | 93308957  | 93309957  | Hes6          | ENSMUSG00000067071 | 328  | 0.16 | 0.2  | 0.08 | 0.12 | 0.1  | 0.13 |
| chr1 | 37597160  | 37597765  | Mgat4a        | ENSMUSG00000026110 | 399  | 0.22 | 0.14 | 0.07 | 0.12 | 0.09 | 0.13 |
| chr1 | 130313401 | 130314019 | Dars          | ENSMUSG00000026356 | 283  | 0.11 | 0.68 | 0.12 | 0.2  | 0.32 | 0.16 |
| chr1 | 36748167  | 36748714  | Cox5b         | ENSMUSG00000061518 | 108  | 0.29 | 0.33 | 0.13 | 0.21 | 0.16 | 0.14 |
| chr1 | 43009637  | 43010388  | Gpr45         | ENSMUSG00000079587 | 293  | 0.1  | 0.14 | 0.12 | 0.12 | 0.19 | 0.13 |
| chr1 | 75381493  | 75381755  | Speg          | ENSMUSG00000026207 | 221  | 0.56 | 1    | 0.56 | 0.33 | 0.9  | 0.69 |
| chr1 | 94370037  | 94370541  | Ndufa10       | ENSMUSG00000026260 | 148  | 0.11 | 0.1  | 0.11 | 0.16 | 0.07 | 0.13 |
| chr1 | 167166514 | 167167249 | Tipr1         | ENSMUSG00000040843 | 172  | 1    | NA   | 0.1  | 0.25 | 0.33 | 0.43 |
| chr1 | 155272285 | 155272721 | 1700012A16Rik | ENSMUSG00000042708 | 211  | 0.28 | 1    | 0.17 | 0.34 | 0.7  | 0.19 |
| chr1 | 193645128 | 193645850 | Nek2          | ENSMUSG00000026622 | 166  | 0.16 | 0.08 | 0.1  | 0.1  | 0.1  | 0.11 |
| chr1 | 93146868  | 93147430  | Ube2f         | ENSMUSG00000034343 | 261  | 0.05 | 0.11 | 0.08 | 0.1  | 0.09 | 0.13 |
| chr1 | 130140676 | 130141549 | Ubxn4         | ENSMUSG00000026353 | 354  | 0.07 | 0.09 | 0.1  | 0.21 | 0.15 | 0.16 |
| chr1 | 20809969  | 20810378  | Mcm3          | ENSMUSG00000041859 | 186  | 0.2  | 0.11 | 0.1  | 0.22 | 0.09 | 0.18 |
| chr1 | 52557352  | 52557671  | Nab1          | ENSMUSG00000002881 | 12   | 0.31 | 0.14 | 0.11 | 0.15 | 0.17 | 0.15 |
| chr1 | 166179170 | 166179817 | Slc19a2       | ENSMUSG00000040918 | 316  | 0.3  | 0.14 | 0.14 | 0.19 | 0.08 | 0.3  |
| chr1 | 16655227  | 16655707  | Tmem70        | ENSMUSG00000025940 | 179  | 0.23 | 0.12 | 0.11 | 0.13 | 0.12 | 0.14 |
| chr1 | 75518006  | 75518560  | Stk11ip       | ENSMUSG00000026213 | 179  | 1    | 0.13 | 0.09 | 0.18 | 0.05 | 0.18 |
| chr1 | 84835029  | 84836875  | Trip12        | ENSMUSG00000026219 | -73  | 0.11 | 0.27 | 0.17 | 0.19 | 0.16 | 0.15 |
| chr1 | 154233443 | 154233874 | Tsen15        | ENSMUSG00000014980 | 64   | 0.25 | 0.25 | 0.12 | 0.3  | 0.16 | 0.21 |
| chr1 | 30929953  | 30930871  | Phf3          | ENSMUSG00000048874 | 127  | 0.14 | 0.12 | 0.08 | 0.16 | 0.09 | 0.1  |

|      |           |           |               |                    |      |      |      |      |      |      |      |
|------|-----------|-----------|---------------|--------------------|------|------|------|------|------|------|------|
| chr1 | 157588247 | 157590376 | Lhx4          | ENSMUSG00000026468 | -61  | 0.12 | 0.15 | 0.08 | 0.13 | 0.08 | 0.14 |
| chr1 | 167389710 | 167391695 | Dcaf6         | ENSMUSG00000026571 | -106 | 0.15 | 0.28 | 0.1  | 0.18 | 0.22 | 0.15 |
| chr1 | 38054668  | 38055520  | Eif5b         | ENSMUSG00000026083 | 239  | 0.14 | 0.1  | 0.11 | 0.11 | 0.09 | 0.13 |
| chr1 | 74437906  | 74439004  | Ctdsp1        | ENSMUSG00000026176 | 372  | 0.11 | 0.08 | 0.13 | 0.13 | 0.08 | 0.13 |
| chr1 | 75475244  | 75476361  | Chpf          | ENSMUSG00000032997 | -481 | 0.1  | 0.11 | 0.1  | 0.17 | 0.14 | 0.12 |
| chr1 | 181447862 | 181448198 | Smyd3         | ENSMUSG00000055067 | 52   | 0.5  | 0.31 | 0.08 | 0.17 | 0.19 | 0.14 |
| chr1 | 62749412  | 62750322  | Nrp2          | ENSMUSG00000025969 | 8    | 0.07 | 0.12 | 0.11 | 0.17 | 0.11 | 0.13 |
| chr1 | 94538303  | 94538622  | Myeov2        | ENSMUSG00000073616 | 38   | 0.6  | 1    | 0.28 | 1    | 0.26 | 0.26 |
| chr1 | 97210095  | 97210823  | Fam174a       | ENSMUSG00000051185 | 254  | 0.12 | 0.27 | 0.11 | 0.13 | 0.17 | 0.16 |
| chr1 | 75165132  | 75165516  | Zfand2b       | ENSMUSG00000026197 | 104  | 0.1  | 0.15 | 0.09 | 0.15 | 0.17 | 0.12 |
| chr1 | 182655893 | 182656846 | Acbd3         | ENSMUSG00000026499 | 195  | 0.13 | 0.15 | 0.11 | 0.16 | 0.08 | 0.12 |
| chr1 | 63319637  | 63320487  | Gm11608       | ENSMUSG00000087561 | -373 | 0.07 | 0.1  | 0.1  | 0.19 | 0.11 | 0.12 |
| chr1 | 122499420 | 122500567 | En1           | ENSMUSG00000058665 | 998  | 0.2  | 0.13 | 0.25 | 0.25 | 0.14 | 0.17 |
| chr1 | 192849403 | 192850366 | Mfsd7b        | ENSMUSG00000066595 | 185  | 0.11 | 0.13 | 0.1  | 0.11 | 0.07 | 0.11 |
| chr1 | 10029826  | 10030360  | Cspp1         | ENSMUSG00000056763 | 239  | 0.11 | 0.08 | 0.12 | 0.14 | 0.06 | 0.15 |
| chr1 | 157659563 | 157660287 | Qsox1         | ENSMUSG00000033684 | 25   | 0.31 | 0.27 | 0.14 | 0.15 | 0.17 | 0.19 |
| chr1 | 183081022 | 183081476 | Cnih4         | ENSMUSG00000062169 | 187  | 0.28 | 0.24 | 0.13 | 0.12 | 0.19 | 0.17 |
| chr1 | 44204455  | 44205058  | Erc5          | ENSMUSG00000026048 | 167  | 0.26 | 0.13 | 0.13 | 0.2  | 0.16 | 0.18 |
| chr1 | 82286770  | 82288397  | Irs1          | ENSMUSG00000055980 | 408  | 0.13 | 0.43 | 0.08 | 0.16 | 0.08 | 0.18 |
| chr1 | 90967011  | 90967820  | Sh3bp4        | ENSMUSG00000036206 | 387  | 0.24 | 0.22 | 0.1  | 0.09 | 0.11 | 0.16 |
| chr1 | 132774770 | 132775112 | Faim3         | ENSMUSG00000042474 | 33   | 0.14 | 0.1  | 0.1  | 0.19 | 0.07 | 0.13 |
| chr1 | 168309438 | 168310107 | Tada1         | ENSMUSG00000026563 | 324  | 0.18 | 0.11 | 0.1  | 0.15 | 0.11 | 0.16 |
| chr1 | 17086845  | 17088220  | Jph1          | ENSMUSG00000042686 | 347  | 0.19 | 0.17 | 0.09 | 0.15 | 0.14 | 0.14 |
| chr1 | 173126056 | 173126286 | Pcp4l1        | ENSMUSG00000038370 | 228  | 0.09 | 0.05 | 0.09 | 0.12 | 0.21 | 0.14 |
| chr1 | 180457418 | 180461026 | Kif26b        | ENSMUSG00000026494 | -34  | 0.12 | 0.2  | 0.12 | 0.16 | 0.16 | 0.14 |
| chr1 | 55109351  | 55110141  | Coq10b        | ENSMUSG00000025981 | 132  | 0.17 | 0.27 | 0.11 | 0.17 | 0.13 | 0.13 |
| chr1 | 72757435  | 72758292  | Rpl37a        | ENSMUSG00000046330 | 29   | 0.11 | 0.09 | 0.11 | 0.17 | 0.18 | 0.17 |
| chr1 | 145586517 | 145586886 | Glrx2         | ENSMUSG00000018196 | 14   | 0.14 | 0.09 | 0.08 | 0.09 | 0.07 | 0.24 |
| chr1 | 57462981  | 57463911  | 9430016H08Rik | ENSMUSG00000025971 | 274  | 0.14 | 0.14 | 0.1  | 0.16 | 0.25 | 0.17 |
| chr1 | 89406115  | 89407132  | Neu2          | ENSMUSG00000079434 | 159  | 0.11 | 0.13 | 0.09 | 0.13 | 0.08 | 0.1  |

|      |           |           |               |                     |      |      |      |      |      |      |      |
|------|-----------|-----------|---------------|---------------------|------|------|------|------|------|------|------|
| chr1 | 172519410 | 172520189 | Nos1ap        | ENSMUSG00000038473  | -371 | 0.12 | 0.13 | 0.15 | 0.09 | 0.09 | 0.16 |
| chr1 | 10028031  | 10028296  | Cops5         | ENSMUSG00000025917  | 45   | 0.12 | 0.43 | 0.14 | 0.27 | 0.24 | 0.15 |
| chr1 | 75378499  | 75378962  | Speg          | ENSMUSG00000026207  | 41   | 0.3  | 0.36 | 0.18 | 0.19 | 0.46 | 0.19 |
| chr1 | 93436894  | 93437649  | Asb1          | ENSMUSG00000026311  | 129  | 0.18 | 0.07 | 0.1  | 0.13 | 0.1  | 0.12 |
| chr1 | 163180948 | 163181409 | Prdx6         | ENSMUSG00000026701  | 74   | 0.19 | 0.13 | 0.17 | 0.13 | 0.33 | 0.11 |
| chr1 | 23768661  | 23770043  | B3gat2        | ENSMUSG00000026156  | 587  | 0.12 | 0.08 | 0.12 | 0.16 | 0.08 | 0.14 |
| chr1 | 39633370  | 39634372  | Rnf149        | ENSMUSG00000048234  | 379  | 0.18 | 0.13 | 0.15 | 0.13 | 0.13 | 0.16 |
| chr1 | 84931147  | 84931629  | Slc16a14      | ENSMUSG00000026220  | 312  | 0.16 | 0.13 | 0.1  | 0.16 | 0.29 | 0.19 |
| chr1 | 87791049  | 87791481  | Itn2c         | ENSMUSG00000026223  | 409  | 0.68 | 0.68 | 0.14 | 0.28 | 0.48 | 0.14 |
| chr1 | 127331751 | 127332553 | Actr3         | ENSMUSG00000026341  | -85  | 0.23 | 0.19 | 0.1  | 0.15 | 0.15 | 0.21 |
| chr1 | 172815137 | 172815638 | Dusp12        | ENSMUSG00000026659  | -57  | 0.13 | 0.1  | 0.09 | 0.14 | 0.07 | 0.12 |
| chr1 | 45852220  | 45852602  | Wdr75         | ENSMUSG00000025995  | 117  | 0.09 | 0.08 | 0.08 | 0.13 | 0.05 | 0.17 |
| chr1 | 127808025 | 127808826 | Lypd1         | ENSMUSG00000026344  | 366  | 0.1  | 0.12 | 0.08 | 0.23 | 0.17 | 0.11 |
| chr1 | 132612143 | 132612447 | Pfkfb2        | ENSMUSG00000026409  | 16   | 0.5  | 0.14 | 0.17 | 0.17 | 0.19 | 0.13 |
| chr1 | 153347156 | 153348271 | Rnf2          | ENSMUSG00000026484  | 240  | 0.08 | 0.1  | 0.11 | 0.15 | 0.1  | 0.13 |
| chr1 | 174078092 | 174078693 | Dcaf8         | ENSMUSG00000026554  | 246  | 0.22 | 0.22 | 0.17 | 0.22 | 0.1  | 0.21 |
| chr1 | 191511793 | 191512318 | Cenpf         | ENSMUSG00000026605  | -141 | 0.29 | 0.08 | 0.09 | 0.23 | 0.14 | 0.1  |
| chr1 | 193398834 | 193399970 | Dtl           | ENSMUSG00000037474  | 11   | 0.16 | 0.06 | 0.09 | 0.15 | 0.1  | 0.1  |
| chr1 | 193960606 | 193962494 | Gm10516       | ENSMUSG00000073476  | 770  | 0.11 | 0.12 | 0.09 | 0.15 | 0.15 | 0.15 |
| chr1 | 36995686  | 36996967  | Tmem131       | ENSMUSG00000026116  | 46   | 0.12 | 0.09 | 0.09 | 0.14 | 0.1  | 0.11 |
| chr1 | 55187901  | 55188617  | Mob4          | ENSMUSG00000025979  | 184  | 0.25 | 0.2  | 0.12 | 0.19 | 0.17 | 0.12 |
| chr1 | 57027702  | 57027963  | 9130024F11Rik | ENSMUSG000000087022 | -503 | 0.13 | 0.06 | 0.06 | 0.05 | 0.06 | 0.1  |
| chr1 | 71148978  | 71149794  | Bard1         | ENSMUSG00000026196  | 334  | 0.1  | 0.08 | 0.09 | 0.11 | 0.06 | 0.1  |
| chr1 | 133422293 | 133424974 | Srgap2        | ENSMUSG00000026425  | 305  | 0.2  | 0.2  | 0.1  | 0.13 | 0.29 | 0.15 |
| chr1 | 177555409 | 177555791 | Fh1           | ENSMUSG00000026526  | 104  | 0.17 | 0.25 | 0.12 | 0.21 | 0.12 | 0.17 |
| chr1 | 189039347 | 189039679 | Gpatch2       | ENSMUSG00000039210  | 126  | 0.11 | 0.1  | 0.08 | 0.14 | 0.07 | 0.13 |
| chr1 | 194660819 | 194661245 | A730013G03Rik | ENSMUSG00000047384  | -119 | 0.32 | 0.31 | 0.14 | 0.15 | 0.52 | 0.19 |
| chr1 | 121316871 | 121319454 | Inhbb         | ENSMUSG00000037035  | 663  | 0.09 | 0.12 | 0.12 | 0.14 | 0.07 | 0.15 |
| chr1 | 9838246   | 9838611   | Sgk3          | ENSMUSG00000025915  | 66   | 0.18 | 0.15 | 0.12 | 0.17 | 0.13 | 0.1  |
| chr1 | 36835929  | 36836165  | Zap70         | ENSMUSG00000026117  | 200  | 0.84 | 0.82 | 0.82 | 0.74 | 0.92 | 0.91 |

|      |           |           |               |                    |       |      |      |      |      |      |      |
|------|-----------|-----------|---------------|--------------------|-------|------|------|------|------|------|------|
| chr1 | 42750919  | 42751329  | RP23-71K9.1   | ENSMUSG00000093778 | 546   | 0.09 | 0.06 | 0.16 | 0.16 | 1    | 0.17 |
| chr1 | 71699271  | 71699932  | Apol7d        | ENSMUSG00000073652 | 190   | 0.14 | 0.21 | 0.09 | 0.16 | 0.1  | 0.14 |
| chr1 | 87961033  | 87961743  | Psmc1         | ENSMUSG00000026229 | 194   | 0.15 | 0.09 | 0.09 | 0.15 | 0.2  | 0.14 |
| chr1 | 155179133 | 155180209 | Lamc1         | ENSMUSG00000026478 | 245   | 0.08 | 0.07 | 0.1  | 0.12 | 0.06 | 0.13 |
| chr1 | 16608639  | 16609482  | Ube2w         | ENSMUSG00000025939 | 280   | 0.11 | 0.1  | 0.11 | 0.14 | 0.08 | 0.09 |
| chr1 | 40737851  | 40738929  | Slc9a2        | ENSMUSG00000026062 | -167  | 0.12 | 0.07 | 0.09 | 0.14 | 0.08 | 0.12 |
| chr1 | 137584308 | 137585061 | Nav1          | ENSMUSG00000090399 | -2    | 0.15 | 0.17 | 0.11 | 0.16 | 0.21 | 0.21 |
| chr1 | 134313946 | 134314567 | Dstyk         | ENSMUSG00000042046 | 226   | 0.11 | 0.15 | 0.08 | 0.12 | 0.18 | 0.12 |
| chr1 | 140859971 | 140860685 | Dennd1b       | ENSMUSG00000056268 | 315   | 0.21 | 0.12 | 0.1  | 0.21 | 0.16 | 0.11 |
| chr1 | 141318673 | 141319328 | Zbtb41        | ENSMUSG00000033964 | 40    | 0.11 | 0.09 | 0.09 | 0.1  | 0.06 | 0.11 |
| chr1 | 158604186 | 158604547 | Tor3a         | ENSMUSG00000060519 | 79    | 0.14 | 0.11 | 0.09 | 0.13 | 0.25 | 0.1  |
| chr1 | 15795672  | 15796189  | Terf1         | ENSMUSG00000025925 | 191   | 0.33 | 0.18 | 0.11 | 0.33 | 0.08 | 0.21 |
| chr1 | 23108726  | 23109101  | 4933415F23Rik | ENSMUSG00000073730 | 179   | 0.92 | 0.94 | 0.75 | 0.72 | 0.96 | 0.96 |
| chr1 | 84280891  | 84281187  | Pid1          | ENSMUSG00000045658 | -41   | 0.08 | 0.08 | 0.1  | 0.16 | 0.06 | 0.11 |
| chr1 | 136258353 | 136258745 | Tmem183a      | ENSMUSG00000042305 | 27    | 0.27 | 0.25 | 0.15 | 0.19 | 0.16 | 0.24 |
| chr1 | 138362793 | 138363207 | Kif14         | ENSMUSG00000041498 | -1535 | 0.2  | 0.15 | 0.09 | 0.16 | 0.14 | 0.13 |
| chr1 | 184694023 | 184694281 | Susd4         | ENSMUSG00000038576 | 9     | 0.11 | 0.04 | 0.08 | 0.14 | 0.17 | 0.15 |
| chr1 | 186555533 | 186556924 | Hlx           | ENSMUSG00000039377 | 102   | 0.15 | 0.13 | 0.12 | 0.15 | 0.1  | 0.18 |
| chr1 | 72258323  | 72258996  | Mreg          | ENSMUSG00000039395 | 222   | 0.13 | 0.13 | 0.1  | 0.11 | 0.1  | 0.11 |
| chr1 | 72282977  | 72283498  | D230017M19Rik | ENSMUSG00000085769 | 198   | 0.15 | 0.27 | 0.18 | 0.19 | 0.32 | 0.34 |
| chr1 | 75542839  | 75543331  | Slc4a3        | ENSMUSG00000006576 | 244   | 0.2  | 0.1  | 0.21 | 0.15 | 0.14 | 0.17 |
| chr1 | 20880515  | 20880892  | 6720483E21Rik | ENSMUSG00000087078 | -149  | 0.12 | 0.17 | 0.17 | 0.15 | 0.2  | 0.23 |
| chr1 | 20941743  | 20941971  | Efhc1         | ENSMUSG00000041809 | 88    | 0.4  | 0.6  | 0.81 | 0.47 | 0.6  | 0.17 |
| chr1 | 80754646  | 80755360  | Dock10        | ENSMUSG00000038608 | 125   | 0.37 | 0.42 | 0.19 | 0.28 | 0.24 | 0.12 |
| chr1 | 136543243 | 136543830 | Gm3834        | ENSMUSG00000091246 | -439  | 0.04 | 0.06 | 0.09 | 0.15 | 0.15 | 0.14 |
| chr1 | 193149725 | 193150359 | Tmem206       | ENSMUSG00000026627 | 251   | 0.07 | 0.06 | 0.11 | 0.18 | 0.11 | 0.09 |
| chr1 | 134776887 | 134777523 | Lrrn2         | ENSMUSG00000026443 | 273   | 0.07 | 0.05 | 0.07 | 0.16 | 0.1  | 0.12 |
| chr1 | 154802060 | 154803381 | Nmnat2        | ENSMUSG00000042751 | 489   | 0.08 | 0.24 | 0.18 | 0.16 | 0.12 | 0.15 |
| chr1 | 7078572   | 7079352   | Pcmdt1        | ENSMUSG00000051285 | -39   | 0.11 | 0.05 | 0.09 | 0.13 | 0.05 | 0.15 |
| chr1 | 58480187  | 58480974  | Clk1          | ENSMUSG00000026034 | 330   | 0.33 | 0.32 | 0.11 | 0.22 | 0.17 | 0.1  |

|      |           |           |               |                    |       |      |      |      |      |      |      |
|------|-----------|-----------|---------------|--------------------|-------|------|------|------|------|------|------|
| chr1 | 59030054  | 59030961  | Trak2         | ENSMUSG00000026028 | -234  | 0.17 | 0.19 | 0.11 | 0.23 | 0.13 | 0.17 |
| chr1 | 74838307  | 74838816  | Wnt10a        | ENSMUSG00000026167 | 471   | 0.43 | 0.17 | 0.07 | 0.11 | 0.16 | 0.12 |
| chr1 | 87942431  | 87943158  | 2810459M11Rik | ENSMUSG00000026227 | 356   | 0.09 | 0.09 | 0.07 | 0.11 | 0.07 | 0.1  |
| chr1 | 90173788  | 90174279  | Hjurp         | ENSMUSG00000044783 | 48    | 0.12 | 0.05 | 0.07 | 0.15 | 0.09 | 0.1  |
| chr1 | 162125092 | 162125541 | Mrps14        | ENSMUSG00000058267 | -30   | 0.22 | 0.09 | 0.08 | 0.19 | 0.09 | 0.11 |
| chr1 | 173433519 | 173434331 | Alyref2       | ENSMUSG00000060244 | 316   | 0.46 | 0.28 | 0.15 | 0.27 | 0.33 | 0.19 |
| chr1 | 188529018 | 188529595 | Tgfb2         | ENSMUSG00000039239 | -137  | 0.09 | 0.14 | 0.1  | 0.15 | 0.13 | 0.14 |
| chr1 | 191745769 | 191746277 | Smyd2         | ENSMUSG00000026603 | 109   | 0.05 | 0.1  | 0.11 | 0.12 | 0.07 | 0.08 |
| chr1 | 191994469 | 191994910 | Prox1         | ENSMUSG00000010175 | -130  | 0.12 | 0.04 | 0.1  | 0.11 | 0.05 | 0.21 |
| chr1 | 9933866   | 9934277   | Snord87       | ENSMUSG00000093178 | -1441 | 0.1  | 0.27 | 0.16 | 0.19 | 0.15 | 0.16 |
| chr1 | 12980799  | 12981281  | Slco5a1       | ENSMUSG00000025938 | -45   | 0.07 | 0.1  | 0.24 | 0.34 | 0.14 | 0.2  |
| chr1 | 58449592  | 58450741  | Bzw1          | ENSMUSG00000051223 | 186   | 0.22 | 0.16 | 0.13 | 0.17 | 0.18 | 0.14 |
| chr1 | 193219957 | 193221680 | Ppp2r5a       | ENSMUSG00000026626 | 101   | 0.14 | 0.12 | 0.12 | 0.16 | 0.12 | 0.13 |
| chr1 | 43149092  | 43149661  | Tgfbra1       | ENSMUSG00000070939 | -68   | 0.1  | 0.15 | 0.11 | 0.1  | 0.08 | 0.13 |
| chr1 | 137662457 | 137663287 | Phlda3        | ENSMUSG00000041801 | 176   | 0.09 | 0.19 | 0.11 | 0.17 | 0.07 | 0.12 |
| chr1 | 183074104 | 183074436 | Nvl           | ENSMUSG00000026516 | 18    | 0.15 | 0.09 | 0.07 | 0.13 | 0.08 | 0.15 |
| chr1 | 192735372 | 192735810 | Rps6kc1       | ENSMUSG00000089872 | 22    | 0.24 | NA   | 0.08 | 0.13 | 0.12 | 0.11 |
| chr1 | 42907984  | 42908527  | Mrps9         | ENSMUSG00000060679 | 177   | 0.4  | 0.2  | 0.14 | 0.3  | 0.13 | 0.3  |
| chr1 | 154247048 | 154247494 | Git25d2       | ENSMUSG00000032649 | 311   | 0.24 | 0.2  | 0.14 | 0.13 | 0.1  | 0.18 |
| chr1 | 173367561 | 173368084 | F11r          | ENSMUSG00000038235 | 156   | 0.32 | 0.35 | 0.16 | 0.19 | 0.21 | 0.18 |
| chr1 | 182125840 | 182126453 | Adck3         | ENSMUSG00000026489 | -113  | 0.29 | 0.44 | 0.12 | 0.16 | 0.44 | 0.19 |
| chr1 | 5073120   | 5073617   | Atp6v1h       | ENSMUSG00000033793 | 114   | 0.2  | 0.53 | 0.19 | 0.16 | 0.32 | 0.14 |
| chr1 | 72582726  | 72582963  | 4-Mar         | ENSMUSG00000039372 | 660   | 0.45 | 0.28 | 0.12 | 0.29 | 0.24 | 0.18 |
| chr1 | 74350440  | 74350929  | Tmbim1        | ENSMUSG00000006301 | 10    | 0.16 | 0.18 | 0.14 | 0.18 | 0.12 | 0.13 |
| chr1 | 75138006  | 75139764  | 1810031K17Rik | ENSMUSG00000033159 | -776  | 0.12 | 0.12 | 0.12 | 0.18 | 0.08 | 0.13 |
| chr1 | 137625739 | 137625956 | Csrp1         | ENSMUSG00000026421 | 123   | 0.32 | 0.2  | 0.13 | 0.27 | 0.47 | 0.15 |
| chr1 | 157263979 | 157264675 | Xpr1          | ENSMUSG00000026469 | 112   | 0.07 | 0.07 | 0.08 | 0.16 | 0.05 | 0.11 |
| chr1 | 173217669 | 173218191 | Usp21         | ENSMUSG00000053483 | 125   | 0.16 | 0.1  | 0.17 | 0.19 | 0.08 | 0.18 |
| chr1 | 82835903  | 82836895  | AC138214.1    | ENSMUSG00000093782 | 378   | 0.12 | 0.14 | 0.09 | 0.17 | 0.14 | 0.12 |
| chr1 | 94803549  | 94804169  | Dusp28        | ENSMUSG00000047067 | 293   | 0.18 | 0.15 | 0.16 | 0.19 | 0.25 | 0.17 |

|      |           |           |               |                    |      |      |      |      |      |      |      |
|------|-----------|-----------|---------------|--------------------|------|------|------|------|------|------|------|
| chr1 | 99666109  | 99667267  | Gin1          | ENSMUSG00000026333 | -61  | 0.06 | 0.21 | 0.16 | 0.22 | 0.09 | 0.16 |
| chr1 | 108655924 | 108656479 | Kdsr          | ENSMUSG00000009905 | 118  | 0.1  | 0.1  | 0.1  | 0.17 | 0.15 | 0.1  |
| chr1 | 11404141  | 11404546  | A830018L16Rik | ENSMUSG00000057715 | 157  | 0.08 | 0.04 | 0.07 | 0.15 | 0.03 | 0.15 |
| chr1 | 59727540  | 59727744  | Sumo1         | ENSMUSG00000026021 | 36   | 0.38 | 0.14 | 0.11 | 0.12 | 0.13 | 0.24 |
| chr1 | 74331037  | 74331709  | Aamp          | ENSMUSG00000006299 | -119 | 0.47 | 0.19 | 0.16 | 0.17 | 0.34 | 0.1  |
| chr1 | 74997205  | 74998667  | lhh           | ENSMUSG00000006538 | 289  | 0.1  | 0.13 | 0.12 | 0.15 | 0.12 | 0.17 |
| chr1 | 89052413  | 89052695  | Ecel1         | ENSMUSG00000026247 | 186  | 0.67 | 0.46 | 0.16 | 0.26 | 1    | 0.15 |
| chr1 | 120524398 | 120524859 | Tfcp2l1       | ENSMUSG00000026380 | 106  | 0.34 | 0.31 | 0.15 | 0.16 | 0.22 | 0.16 |
| chr1 | 183949641 | 183950845 | Enah          | ENSMUSG00000022995 | -132 | 0.16 | 0.16 | 0.22 | 0.25 | 0.2  | 0.19 |
| chr1 | 165924564 | 165925285 | BC055324      | ENSMUSG00000041406 | -252 | 0.25 | 0.23 | 0.1  | 0.2  | 0.15 | 0.18 |
| chr1 | 168238972 | 168239613 | 5330438I03Rik | ENSMUSG00000091393 | 424  | 0.07 | 0.1  | 0.07 | 0.11 | 0.1  | 0.11 |
| chr1 | 172574326 | 172574791 | Olfml2b       | ENSMUSG00000038463 | -105 | 0.18 | 0.1  | 0.11 | 0.19 | 0.14 | 0.22 |
| chr1 | 191167193 | 191167861 | Kcnk2         | ENSMUSG00000037624 | 184  | 0.14 | 0.13 | 0.11 | 0.17 | 0.2  | 0.13 |
| chr1 | 10983567  | 10984086  | Prex2         | ENSMUSG00000048960 | 280  | 0.15 | 0.15 | 0.11 | 0.22 | 0.1  | 0.09 |
| chr1 | 40847363  | 40847656  | Mfsd9         | ENSMUSG00000041945 | -7   | 0.49 | NA   | 0.12 | 0.45 | 0.63 | 0.24 |
| chr1 | 89050487  | 89051660  | Ecel1         | ENSMUSG00000026247 | 529  | 0.08 | 0.06 | 0.09 | 0.12 | 0.07 | 0.12 |
| chr1 | 133034353 | 133034955 | Dyrk3         | ENSMUSG00000016526 | 157  | 0.38 | 0.1  | 0.1  | 0.2  | 0.14 | 0.15 |
| chr1 | 43502691  | 43503413  | Nck2          | ENSMUSG00000066877 | 456  | 0.15 | 0.11 | 0.13 | 0.2  | 0.12 | 0.13 |
| chr1 | 51972027  | 51973038  | Myo1b         | ENSMUSG00000018417 | 224  | 0.1  | 0.07 | 0.08 | 0.13 | 0.14 | 0.09 |
| chr1 | 54614099  | 54614649  | Pgap1         | ENSMUSG00000070889 | 152  | 0.13 | 0.11 | 0.1  | 0.14 | 0.09 | 0.13 |
| chr1 | 107252539 | 107253475 | Gm17634       | ENSMUSG00000090759 | 423  | 0.12 | 0.14 | 0.12 | 0.15 | 0.08 | 0.14 |
| chr1 | 107886456 | 107888331 | Zcchc2        | ENSMUSG00000038866 | 410  | 0.09 | 0.09 | 0.1  | 0.14 | 0.08 | 0.14 |
| chr1 | 123224230 | 123224720 | Insig2        | ENSMUSG0000003721  | -220 | 0.13 | 0.07 | 0.1  | 0.14 | 0.07 | 0.15 |
| chr1 | 135557464 | 135558021 | Zc3h11a       | ENSMUSG00000026464 | 215  | 0.57 | 0.38 | 0.33 | 0.29 | 0.4  | 0.42 |
| chr1 | 155746907 | 155748196 | Glul          | ENSMUSG00000026473 | 477  | 0.12 | 0.12 | 0.14 | 0.13 | 0.08 | 0.17 |
| chr1 | 162722160 | 162723301 | Rabgap1l      | ENSMUSG00000026721 | 339  | 0.08 | 0.15 | 0.13 | 0.14 | 0.1  | 0.17 |
| chr1 | 179371622 | 179372907 | Gm17407       | ENSMUSG00000078909 | 1137 | 0.16 | 0.15 | 0.1  | 0.13 | 0.12 | 0.11 |
| chr1 | 190831111 | 190831837 | Kctd3         | ENSMUSG00000026608 | 245  | 0.25 | 0.19 | 0.09 | 0.18 | 0.34 | 0.15 |
| chr1 | 36613652  | 36615335  | Sema4c        | ENSMUSG00000026121 | -122 | 0.13 | 0.11 | 0.09 | 0.14 | 0.1  | 0.13 |
| chr1 | 39424279  | 39425462  | Rpl31         | ENSMUSG00000073702 | 174  | 0.18 | 0.17 | 0.07 | 0.18 | 0.15 | 0.15 |

|      |           |           |               |                    |       |      |      |      |      |      |      |
|------|-----------|-----------|---------------|--------------------|-------|------|------|------|------|------|------|
| chr1 | 130255914 | 130256433 | Mcm6          | ENSMUSG00000026355 | 51    | 0.18 | 0.06 | 0.06 | 0.09 | 0.11 | 0.11 |
| chr1 | 132613253 | 132614410 | Yod1          | ENSMUSG00000046404 | -73   | 0.14 | 0.11 | 0.1  | 0.14 | 0.08 | 0.14 |
| chr1 | 137815286 | 137815863 | Pkp1          | ENSMUSG00000026413 | 123   | 0.29 | 0.45 | 0.11 | 0.38 | 0.2  | 0.16 |
| chr1 | 157819853 | 157820801 | Cep350        | ENSMUSG00000033671 | -310  | 0.15 | 0.14 | 0.13 | 0.13 | 0.35 | 0.19 |
| chr1 | 162964535 | 162965312 | Gas5          | ENSMUSG00000053332 | 370   | 0.14 | 0.09 | 0.11 | 0.14 | 0.11 | 0.17 |
| chr1 | 181476047 | 181477016 | Tfb2m         | ENSMUSG00000026492 | -183  | 0.06 | 0.1  | 0.09 | 0.17 | 0.07 | 0.15 |
| chr1 | 89749924  | 89750472  | Dgkd          | ENSMUSG00000070738 | 336   | 0.1  | 0.13 | 0.07 | 0.11 | 0.12 | 0.1  |
| chr1 | 133806821 | 133807795 | Nucks1        | ENSMUSG00000026434 | 273   | 0.08 | 0.06 | 0.09 | 0.15 | 0.06 | 0.14 |
| chr1 | 140743770 | 140744026 | Lhx9          | ENSMUSG00000019230 | 258   | 0.5  | 0.06 | 0.13 | 0.13 | 0.07 | 0.17 |
| chr1 | 188528159 | 188528404 | Tgfb2         | ENSMUSG00000039239 | 888   | 0.15 | 0.06 | 0.08 | 0.24 | 0.11 | 0.14 |
| chr1 | 193141670 | 193142022 | Nenf          | ENSMUSG00000037499 | 227   | 0.09 | 0.08 | 0.05 | 0.14 | 0.14 | 0.14 |
| chr1 | 4847546   | 4848453   | Tcea1         | ENSMUSG00000033813 | 224   | 0.19 | 0.15 | 0.14 | 0.16 | 0.14 | 0.17 |
| chr1 | 95700054  | 95700968  | Ing5          | ENSMUSG00000026283 | -31   | 0.67 | 0.38 | 0.15 | 0.21 | 0.26 | 0.16 |
| chr1 | 108068006 | 108069907 | Philpp1       | ENSMUSG00000044340 | 627   | 0.1  | 0.15 | 0.11 | 0.13 | 0.11 | 0.13 |
| chr1 | 188573127 | 188573381 | Rrp15         | ENSMUSG0000001305  | -50   | 0.41 | 0.13 | 0.13 | 0.18 | 0.28 | 0.13 |
| chr1 | 58026577  | 58027089  | Kctd18        | ENSMUSG00000054770 | 59    | 0.5  | 0.11 | 0.1  | 0.13 | 0.08 | 0.17 |
| chr1 | 136131954 | 136132232 | Adora1        | ENSMUSG00000042429 | -89   | 0.28 | 0.31 | 0.07 | 0.21 | 0.21 | 0.11 |
| chr1 | 34858546  | 34858904  | Arhgef4       | ENSMUSG00000037509 | 176   | 0.12 | 0.05 | 0.09 | 0.17 | 0.18 | 0.11 |
| chr1 | 61685310  | 61685980  | Pard3b        | ENSMUSG00000052062 | 247   | 0.06 | 0.06 | 0.1  | 0.13 | 0.09 | 0.1  |
| chr1 | 65232953  | 65233627  | Idh1          | ENSMUSG00000025950 | -237  | 0.34 | 0.39 | 0.15 | 0.27 | 0.29 | 0.21 |
| chr1 | 79772558  | 79772961  | Mrpl44        | ENSMUSG00000026248 | 166   | 0.25 | 0.25 | 0.12 | 0.19 | 0.19 | 0.24 |
| chr1 | 95582031  | 95583211  | Bok           | ENSMUSG00000026278 | 350   | 0.11 | 0.21 | 0.09 | 0.23 | 0.08 | 0.13 |
| chr1 | 186634648 | 186635052 | Mosc1         | ENSMUSG00000026621 | 226   | 0.19 | 0.19 | 0.07 | 0.27 | 0.29 | 0.19 |
| chr1 | 36603755  | 36604135  | Ankrd39       | ENSMUSG00000079610 | 101   | 0.18 | 0.13 | 0.14 | 0.24 | 0.14 | 0.14 |
| chr1 | 53841613  | 53842213  | Stk17b        | ENSMUSG00000026094 | 155   | 0.08 | 0.08 | 0.08 | 0.15 | 0.07 | 0.11 |
| chr1 | 145623844 | 145624785 | Trove2        | ENSMUSG00000018199 | -262  | 0.14 | 0.12 | 0.11 | 0.15 | 0.12 | 0.15 |
| chr1 | 173177145 | 173177532 | Ndufs2        | ENSMUSG00000013593 | -85   | 0.09 | 0.4  | 0.17 | 0.14 | 0.05 | 0.14 |
| chr1 | 191551805 | 191552712 | Ptpn14        | ENSMUSG00000026604 | 111   | 0.13 | 0.14 | 0.1  | 0.13 | 0.15 | 0.13 |
| chr1 | 34807103  | 34807930  | Arhgef4       | ENSMUSG00000037509 | -210  | 0.08 | 0.13 | 0.07 | 0.2  | 0.1  | 0.11 |
| chr1 | 91825231  | 91825570  | D130058E05Rik | ENSMUSG00000092627 | -1409 | 0.11 | 0.08 | 0.14 | 0.25 | 0.15 | 0.19 |



|      |           |           |               |                     |       |      |      |      |      |      |      |
|------|-----------|-----------|---------------|---------------------|-------|------|------|------|------|------|------|
| chr1 | 129670495 | 129671437 | Ccnt2         | ENSMUSG00000026349  | 225   | 0.33 | 0.16 | 0.12 | 0.13 | 0.28 | 0.19 |
| chr1 | 173957129 | 173957614 | Vangl2        | ENSMUSG00000026556  | 28    | 0.06 | 0.09 | 0.06 | 0.13 | 0.08 | 0.13 |
| chr1 | 180335790 | 180336802 | Efcab2        | ENSMUSG00000026495  | 284   | 0.19 | 0.19 | 0.12 | 0.2  | 0.13 | 0.12 |
| chr1 | 193008605 | 193009070 | Atf3          | ENSMUSG00000026628  | -1618 | 0.37 | 0.81 | 0.22 | 0.27 | 0.3  | 0.21 |
| chr1 | 13362827  | 13364875  | Ncoa2         | ENSMUSG00000005886  | 259   | 0.13 | 0.17 | 0.12 | 0.14 | 0.15 | 0.14 |
| chr1 | 51535003  | 51535465  | Obfc2a        | ENSMUSG00000026107  | 9     | 0.05 | 0.03 | 0.14 | 0.12 | 0.1  | 0.12 |
| chr1 | 93262880  | 93263329  | Fam132b       | ENSMUSG00000047443  | 97    | 0.48 | 0.39 | 0.14 | 0.09 | 0.27 | 0.13 |
| chr1 | 194861673 | 194862215 | Syt14         | ENSMUSG00000016200  | -52   | 0.14 | 0.29 | 0.1  | 0.19 | 0.2  | 0.19 |
| chr1 | 54307413  | 54307644  | Ccdc150       | ENSMUSG00000025983  | 1     | 0.29 | 0.3  | 0.17 | 0.33 | 0.2  | 0.15 |
| chr1 | 184054785 | 184055407 | Srp9          | ENSMUSG00000026511  | 228   | 0.14 | 0.3  | 0.09 | 0.2  | 0.1  | 0.15 |
| chr1 | 194659782 | 194659986 | A730013G03Rik | ENSMUSG00000047384  | 1029  | 0.53 | 0.41 | 0.64 | 0.54 | 0.45 | 0.8  |
| chr1 | 152239907 | 152240849 | Tpr           | ENSMUSG00000006005  | 410   | 0.1  | 0.1  | 0.12 | 0.16 | 0.08 | 0.13 |
| chr1 | 36739929  | 36740283  | Fam178b       | ENSMUSG00000046337  | -78   | 0.99 | 0.99 | 0.9  | 1    | 0.95 | 0.98 |
| chr1 | 95202281  | 95202538  | Mterfd2       | ENSMUSG00000026273  | 31    | 0.13 | 0.17 | 0.12 | 0.16 | 0.17 | 0.17 |
| chr1 | 138130799 | 138131240 | 5730559C18Rik | ENSMUSG00000041605  | -178  | 0.23 | 0.1  | 0.1  | 0.25 | 0.14 | 0.14 |
| chr1 | 182626726 | 182627458 | Mixl1         | ENSMUSG00000026497  | 73    | 0.2  | 0.2  | 0.13 | 0.21 | 0.17 | 0.14 |
| chr1 | 138241975 | 138242898 | Camsap2       | ENSMUSG00000041570  | -161  | 0.08 | 0.05 | 0.12 | 0.13 | 0.1  | 0.11 |
| chr1 | 43220573  | 43220925  | Fhl2          | ENSMUSG00000008136  | 57    | 0.06 | 0.09 | 0.09 | 0.12 | 0.08 | 0.13 |
| chr1 | 52289051  | 52290347  | Gls           | ENSMUSG00000026103  | -559  | 0.11 | 0.15 | 0.09 | 0.12 | 0.13 | 0.16 |
| chr1 | 60623026  | 60624104  | Raph1         | ENSMUSG00000026014  | 48    | 0.33 | 0.28 | 0.12 | 0.16 | 0.3  | 0.14 |
| chr1 | 75313680  | 75314644  | Dnpep         | ENSMUSG00000026209  | 50    | 0.09 | 0.12 | 0.1  | 0.13 | 0.12 | 0.13 |
| chr1 | 131170058 | 131170347 | Thsd7b        | ENSMUSG00000042581  | 140   | 1    | 0.33 | 0.18 | 0.29 | 0.19 | 0.2  |
| chr1 | 173080472 | 173080797 | Sdhc          | ENSMUSG00000058076  | 85    | 0.19 | 0.5  | 0.11 | 0.1  | 0.1  | 0.09 |
| chr1 | 174306481 | 174307478 | Pigm          | ENSMUSG00000050229  | 317   | 0.19 | 0.15 | 0.08 | 0.13 | 0.21 | 0.11 |
| chr1 | 137947398 | 137947929 | Cacna1s       | ENSMUSG00000026407  | -1664 | 0.14 | 0.25 | 0.19 | 0.32 | 0.17 | 0.26 |
| chr1 | 153275215 | 153276150 | 1200016B10Rik | ENSMUSG000000052748 | -117  | 0.14 | 0.07 | 0.11 | 0.14 | 0.11 | 0.13 |
| chr1 | 182186009 | 182186554 | Psen2         | ENSMUSG00000010609  | 94    | 0.1  | 0.06 | 0.07 | 0.12 | 0.12 | 0.1  |
| chr1 | 194014547 | 194014968 | Kcnh1         | ENSMUSG00000058248  | 91    | 0.1  | 0.07 | 0.11 | 0.11 | 0.08 | 0.15 |
| chr1 | 79854768  | 79855581  | Serpine2      | ENSMUSG00000026249  | 97    | 0.14 | 0.23 | 0.1  | 0.2  | 0.11 | 0.14 |
| chr1 | 158233248 | 158233921 | Tdrd5         | ENSMUSG00000060985  | -105  | 0.07 | 0.15 | 0.13 | 0.22 | 0.1  | 0.16 |

|      |           |           |               |                    |      |      |      |      |      |      |      |
|------|-----------|-----------|---------------|--------------------|------|------|------|------|------|------|------|
| chr1 | 196445854 | 196447070 | Plxna2        | ENSMUSG00000026640 | 439  | 0.23 | 0.12 | 0.11 | 0.19 | 0.2  | 0.15 |
| chr1 | 21068950  | 21069775  | Tram2         | ENSMUSG00000041779 | -52  | 0.17 | 0.17 | 0.13 | 0.18 | 0.12 | 0.19 |
| chr1 | 43990497  | 43991395  | Tpp2          | ENSMUSG00000041763 | 99   | 0.5  | 0.13 | 0.13 | 0.09 | 0.11 | 0.14 |
| chr1 | 64663519  | 64664366  | Mettl21a      | ENSMUSG00000025956 | -200 | 0.22 | 0.3  | 0.14 | 0.15 | 0.16 | 0.15 |
| chr1 | 141351211 | 141351810 | Aspm          | ENSMUSG00000033952 | 160  | 0.21 | 0.17 | 0.17 | 0.18 | 0.26 | 0.12 |
| chr1 | 153602314 | 153603055 | Edem3         | ENSMUSG00000043019 | 180  | 0.11 | 0.09 | 0.11 | 0.14 | 0.1  | 0.14 |
| chr1 | 34516252  | 34516809  | Ptpn18        | ENSMUSG00000026126 | -61  | 0.16 | 0.1  | 0.1  | 0.2  | 0.1  | 0.1  |
| chr1 | 44158780  | 44159603  | 1700029F09Rik | ENSMUSG00000026049 | -333 | 0.09 | 0.21 | 0.08 | 0.16 | 0.07 | 0.1  |
| chr1 | 156930311 | 156930691 | Gm9530        | ENSMUSG00000086217 | -105 | 0.1  | 0.08 | 0.09 | 0.11 | 0.15 | 0.09 |
| chr1 | 163806582 | 163807229 | Al848100      | ENSMUSG00000040297 | -113 | 0.17 | 0.28 | 0.11 | 0.18 | 0.12 | 0.19 |
| chr1 | 12981566  | 12982865  | Slco5a1       | ENSMUSG00000025938 | -957 | 0.3  | 0.49 | 0.1  | 0.25 | 0.24 | 0.13 |
| chr1 | 19199836  | 19200148  | Tfap2b        | ENSMUSG00000025927 | 951  | 0.09 | 0.19 | 0.12 | 0.25 | 0.05 | 0.18 |
| chr1 | 32229385  | 32229891  | Khdrbs2       | ENSMUSG00000026058 | -13  | 0.1  | 0.12 | 0.13 | 0.2  | 0.07 | 0.12 |
| chr1 | 52556875  | 52557096  | Nab1          | ENSMUSG00000002881 | -161 | 0.04 | 0.05 | 0.08 | 0.09 | 0.05 | 0.15 |
| chr1 | 88566187  | 88567449  | Nppc          | ENSMUSG00000026241 | 329  | 0.11 | 0.1  | 0.09 | 0.14 | 0.09 | 0.11 |
| chr1 | 123327567 | 123327782 | Ccdc93        | ENSMUSG00000026339 | 48   | 0.22 | 0.27 | 0.2  | 0.24 | 0.08 | 0.12 |
| chr1 | 163899249 | 163899645 | 4930558K02Rik | ENSMUSG00000086277 | -168 | 0.37 | 0.15 | 0.18 | 0.23 | 0.28 | 0.13 |
| chr1 | 173200286 | 173200845 | B4galt3       | ENSMUSG00000052423 | 106  | 0.18 | 0.19 | 0.11 | 0.15 | 0.29 | 0.23 |
| chr1 | 25886690  | 25887525  | Gm9884        | ENSMUSG00000052558 | -395 | 0.09 | 0.19 | 0.08 | 0.18 | 0.11 | 0.15 |
| chr1 | 33964747  | 33964951  | Bend6         | ENSMUSG00000042182 | -188 | 0.32 | 0.5  | 0.3  | 0.36 | 0.42 | 0.18 |
| chr1 | 74283154  | 74283767  | Arpc2         | ENSMUSG00000006304 | 336  | 0.13 | 0.08 | 0.11 | 0.2  | 0.18 | 0.14 |
| chr1 | 75215787  | 75216557  | Tuba4a        | ENSMUSG00000026202 | -344 | 0.09 | 0.09 | 0.11 | 0.18 | 0.1  | 0.15 |
| chr1 | 180266550 | 180268143 | Hnrmpu        | ENSMUSG00000039630 | 513  | 0.12 | 0.18 | 0.09 | 0.18 | 0.11 | 0.14 |
| chr1 | 183140938 | 183142519 | Wdr26         | ENSMUSG00000038733 | -171 | 0.11 | 0.15 | 0.11 | 0.13 | 0.09 | 0.12 |
| chr1 | 16094846  | 16096372  | Rdh10         | ENSMUSG00000025921 | -246 | 0.09 | 0.1  | 0.1  | 0.15 | 0.11 | 0.14 |
| chr1 | 36364461  | 36365058  | Arid5a        | ENSMUSG00000037447 | 181  | 0.18 | NA   | 0.07 | 0.17 | 0.12 | 0.11 |
| chr1 | 87914864  | 87915411  | Spata3        | ENSMUSG00000026226 | -131 | 0.11 | 0.08 | 0.09 | 0.25 | 0.19 | 0.15 |
| chr1 | 89223397  | 89224138  | Gigyf2        | ENSMUSG00000048000 | 194  | 0.16 | 0.23 | 0.11 | 0.14 | 0.18 | 0.15 |
| chr1 | 95239137  | 95240669  | Pask          | ENSMUSG00000026274 | -537 | 0.19 | 0.12 | 0.1  | 0.13 | 0.14 | 0.12 |
| chr1 | 133141239 | 133142132 | Rassf5        | ENSMUSG00000026430 | 150  | 0.13 | 0.12 | 0.1  | 0.13 | 0.11 | 0.13 |

|      |           |           |           |                    |       |      |      |      |      |      |      |
|------|-----------|-----------|-----------|--------------------|-------|------|------|------|------|------|------|
| chr1 | 134921662 | 134921996 | Mdm4      | ENSMUSG00000054387 | 96    | 0.16 | 0.14 | 0.12 | 0.15 | 0.23 | 0.17 |
| chr1 | 162142569 | 162143536 | Cacybp    | ENSMUSG00000014226 | -144  | 0.08 | 0.09 | 0.07 | 0.11 | 0.06 | 0.12 |
| chr1 | 184271117 | 184271716 | Fbxo28    | ENSMUSG00000047539 | 321   | 0.13 | 0.14 | 0.1  | 0.14 | 0.14 | 0.15 |
| chr1 | 194956013 | 194956571 | Diexf     | ENSMUSG00000016181 | 153   | 0.27 | 0.1  | 0.13 | 0.18 | 0.16 | 0.19 |
| chr1 | 57028353  | 57030345  | Satb2     | ENSMUSG00000038331 | -647  | 0.17 | 0.17 | 0.1  | 0.17 | 0.19 | 0.15 |
| chr1 | 58561387  | 58562006  | Orc2      | ENSMUSG00000026037 | 257   | 0.11 | 0.31 | 0.13 | 0.25 | 0.14 | 0.12 |
| chr1 | 75484211  | 75484653  | Obsl1     | ENSMUSG00000026211 | -55   | 0.11 | 0.1  | 0.11 | 0.12 | 0.08 | 0.09 |
| chr1 | 121422402 | 121423055 | Tmem185b  | ENSMUSG00000037015 | -274  | 0.15 | 0.15 | 0.08 | 0.17 | 0.13 | 0.14 |
| chr1 | 5008638   | 5009792   | Rgs20     | ENSMUSG00000002459 | -399  | 0.06 | 0.12 | 0.1  | 0.14 | 0.08 | 0.19 |
| chr1 | 88600193  | 88600736  | Dis3l2    | ENSMUSG00000053333 | 85    | 0.07 | 0.11 | 0.11 | 0.12 | 0.09 | 0.13 |
| chr1 | 99557260  | 99558855  | D1Ert622e | ENSMUSG00000044768 | 196   | 0.11 | 0.08 | 0.11 | 0.13 | 0.12 | 0.13 |
| chr1 | 177422229 | 177422847 | Rgs7      | ENSMUSG00000026527 | -1277 | 0.08 | 0.13 | 0.08 | 0.11 | 0.09 | 0.11 |
| chr1 | 82313020  | 82313491  | Rhbdd1    | ENSMUSG00000026142 | 228   | 0.23 | 0.18 | 0.14 | 0.14 | 0.26 | 0.14 |
| chr1 | 95132278  | 95133084  | Sned1     | ENSMUSG00000047793 | 263   | 0.12 | 0.17 | 0.11 | 0.24 | 0.1  | 0.13 |
| chr1 | 23389520  | 23390239  | Ogfr1     | ENSMUSG00000026158 | 135   | 0.17 | 0.12 | 0.09 | 0.16 | 0.15 | 0.13 |
| chr1 | 74901433  | 74903043  | Cdk5r2    | ENSMUSG00000090071 | 730   | 0.14 | 0.12 | 0.08 | 0.13 | 0.13 | 0.17 |
| chr1 | 59293763  | 59294337  | Als2      | ENSMUSG00000026024 | -113  | 0.08 | 0.05 | 0.07 | 0.14 | 0.06 | 0.1  |
| chr1 | 95374803  | 95376034  | Hdlbp     | ENSMUSG00000034088 | -33   | 0.1  | 0.1  | 0.09 | 0.16 | 0.09 | 0.11 |
| chr1 | 58052707  | 58053097  | Sgol2     | ENSMUSG00000026039 | 87    | 0.1  | 0.21 | 0.1  | 0.11 | 0.05 | 0.14 |
| chr1 | 93697463  | 93699258  | Twist2    | ENSMUSG00000007805 | 322   | 0.15 | 0.18 | 0.11 | 0.2  | 0.13 | 0.17 |
| chr1 | 133903919 | 133904989 | Elk4      | ENSMUSG00000026436 | 270   | 0.11 | 0.12 | 0.12 | 0.18 | 0.1  | 0.13 |
| chr1 | 134035882 | 134036137 | Cdk18     | ENSMUSG00000026437 | 173   | 0.07 | 0.11 | 0.08 | 0.1  | 0.09 | 0.09 |
| chr1 | 74170818  | 74171497  | Tns1      | ENSMUSG00000055322 | -136  | 0.16 | 0.13 | 0.11 | 0.2  | 0.14 | 0.14 |
| chr1 | 129101495 | 129102228 | Mgat5     | ENSMUSG00000036155 | 298   | 0.12 | 0.11 | 0.09 | 0.19 | 0.1  | 0.32 |
| chr1 | 140515729 | 140516441 | Nek7      | ENSMUSG00000026393 | 166   | 0.13 | 0.17 | 0.09 | 0.12 | 0.12 | 0.12 |
| chr1 | 172145134 | 172145553 | Uhmk1     | ENSMUSG00000026667 | 185   | 0.1  | 0.07 | 0.11 | 0.15 | 0.09 | 0.1  |
| chr1 | 82721367  | 82721756  | Mff       | ENSMUSG00000026150 | 96    | 0.08 | 0.06 | 0.1  | 0.18 | 0.07 | 0.15 |
| chr1 | 130487486 | 130488341 | Cxcr4     | ENSMUSG00000045382 | 954   | 0.08 | 0.03 | 0.1  | 0.08 | 0.1  | 0.18 |
| chr1 | 187027810 | 187028288 | Rab3gap2  | ENSMUSG00000039318 | 2     | 1    | 0.19 | 0.1  | 0.34 | 0.29 | 0.14 |
| chr1 | 55144254  | 55144584  | Hspd1     | ENSMUSG00000025980 | -1    | 0.07 | 0.14 | 0.12 | 0.14 | 0.08 | 0.17 |

|      |           |           |               |                    |      |      |      |      |      |      |      |
|------|-----------|-----------|---------------|--------------------|------|------|------|------|------|------|------|
| chr1 | 9737641   | 9738726   | 1700034P13Rik | ENSMUSG00000085661 | 454  | 0.16 | 0.17 | 0.14 | 0.21 | 0.18 | 0.18 |
| chr1 | 15882501  | 15883133  | Gm106         | ENSMUSG00000032719 | -14  | 0.12 | 0.16 | 0.09 | 0.21 | 0.14 | 0.13 |
| chr1 | 135260005 | 135260889 | Etnk2         | ENSMUSG00000070644 | 298  | 0.1  | 0.08 | 0.12 | 0.19 | 0.12 | 0.1  |
| chr1 | 136351852 | 136352413 | Klhl12        | ENSMUSG00000026455 | 24   | 0.23 | 0.28 | 0.21 | 0.22 | 0.29 | 0.18 |
| chr1 | 52176137  | 52176581  | Stat1         | ENSMUSG00000026104 | 77   | 0.08 | 0.1  | 0.13 | 0.2  | 0.11 | 0.13 |
| chr1 | 158648468 | 158649039 | Fam20b        | ENSMUSG00000033557 | 288  | 0.5  | 0.17 | 0.12 | 0.11 | 0.16 | 0.15 |
| chr1 | 169238380 | 169239196 | Tmco1         | ENSMUSG00000052428 | -13  | 0.14 | 0.15 | 0.14 | 0.21 | 0.12 | 0.15 |
| chr1 | 37776158  | 37776973  | 2010300C02Rik | ENSMUSG00000026090 | 75   | 0.11 | 0.12 | 0.06 | 0.14 | 0.13 | 0.07 |
| chr1 | 79757826  | 79758408  | Wdfy1         | ENSMUSG00000073643 | 227  | 0.09 | 0.16 | 0.08 | 0.11 | 0.07 | 0.11 |
| chr1 | 181733057 | 181734169 | Gm10518       | ENSMUSG00000073486 | 106  | 0.07 | 0.09 | 0.13 | 0.11 | 0.07 | 0.1  |
| chr1 | 33726398  | 33727414  | Prim2         | ENSMUSG00000026134 | -275 | 0.22 | 0.09 | 0.2  | 0.16 | 0.16 | 0.24 |
| chr1 | 93294674  | 93295644  | Ilkap         | ENSMUSG00000026309 | 201  | 0.21 | 0.38 | 0.14 | 0.19 | 0.25 | 0.15 |
| chr1 | 16083037  | 16083452  | 4930444P10Rik | ENSMUSG00000067795 | 162  | 0.11 | 0.07 | 0.11 | 0.19 | 0.12 | 0.11 |
| chr1 | 66909413  | 66909720  | Acadl         | ENSMUSG00000026003 | 285  | 0.09 | 0.12 | 0.11 | 0.24 | 0.25 | 0.11 |
| chr1 | 36125305  | 36126061  | Hs6st1        | ENSMUSG00000045216 | 438  | 0.08 | 0.1  | 0.14 | 0.12 | 0.08 | 0.14 |
| chr1 | 60099490  | 60100343  | Ica1l         | ENSMUSG00000026018 | 15   | 0.08 | 0.08 | 0.11 | 0.09 | 0.09 | 0.08 |
| chr1 | 168184110 | 168184378 | Ildr2         | ENSMUSG00000040612 | -26  | 0.09 | 0.09 | 0.08 | 0.09 | 0.08 | 0.12 |
| chr1 | 60237058  | 60237333  | Nbeal1        | ENSMUSG00000073664 | -248 | 0.21 | 0.19 | 0.09 | 0.19 | 0.15 | 0.07 |
| chr1 | 135506329 | 135507012 | Snrpe         | ENSMUSG00000090553 | -168 | 0.27 | 0.14 | 0.15 | 0.24 | 0.23 | 0.2  |
| chr1 | 136302528 | 136302751 | Cyb5r1        | ENSMUSG00000026456 | 72   | 0.27 | 0.1  | 0.06 | 0.11 | 0.21 | 0.08 |
| chr1 | 137326530 | 137327297 | Ipo9          | ENSMUSG00000041879 | 83   | 0.09 | 0.05 | 0.07 | 0.19 | 0.14 | 0.14 |
| chr1 | 156945455 | 156946868 | Ier5          | ENSMUSG00000056708 | 605  | 0.13 | 0.2  | 0.07 | 0.15 | 0.12 | 0.15 |
| chr1 | 9787902   | 9788733   | Sgk3          | ENSMUSG00000025915 | 106  | 0.11 | 0.22 | 0.1  | 0.13 | 0.11 | 0.14 |
| chr1 | 42753419  | 42755502  | Pou3f3        | ENSMUSG00000045515 | 469  | 0.1  | 0.15 | 0.11 | 0.15 | 0.1  | 0.13 |
| chr1 | 121733336 | 121734331 | Ptfn4         | ENSMUSG00000026384 | -257 | 0.37 | 0.58 | 0.24 | 0.3  | 0.34 | 0.17 |
| chr1 | 137043072 | 137044143 | Arl8a         | ENSMUSG00000026426 | 206  | 0.08 | 0.1  | 0.1  | 0.1  | 0.09 | 0.11 |
| chr1 | 163072914 | 163073132 | Ankrd45       | ENSMUSG00000044835 | 125  | 0.12 | 0.09 | 0.16 | 0.27 | 0.2  | 0.14 |
| chr1 | 181598015 | 181598823 | Sccpdt        | ENSMUSG00000038936 | 78   | 0.09 | 0.09 | 0.08 | 0.15 | 0.08 | 0.14 |
| chr1 | 34496086  | 34496983  | Ccdc115       | ENSMUSG00000042111 | -17  | 0.13 | 0.12 | 0.15 | 0.19 | 0.15 | 0.17 |
| chr1 | 36425529  | 36426175  | 4632411B12Rik | ENSMUSG00000010453 | 174  | 0.08 | 0.08 | 0.07 | 0.15 | 0.09 | 0.13 |

|      |           |           |               |                     |      |      |      |      |      |      |      |
|------|-----------|-----------|---------------|---------------------|------|------|------|------|------|------|------|
| chr1 | 97563942  | 97564345  | St8sia4       | ENSMUSG00000040710  | 28   | 0.09 | 0.06 | 0.11 | 0.2  | 0.05 | 0.17 |
| chr1 | 163000779 | 163001276 | Dars2         | ENSMUSG00000026709  | -240 | 0.21 | 0.23 | 0.13 | 0.17 | 0.18 | 0.18 |
| chr1 | 95650443  | 95651925  | Thap4         | ENSMUSG00000026279  | 173  | 0.23 | 0.25 | 0.09 | 0.17 | 0.21 | 0.13 |
| chr1 | 99873511  | 99873832  | Pam           | ENSMUSG00000026335  | -26  | 0.17 | 0.5  | 0.17 | 0.13 | 0.08 | 0.19 |
| chr1 | 182872374 | 182873070 | Tmem63a       | ENSMUSG00000026519  | 247  | 0.16 | 0.32 | 0.13 | 0.18 | 0.14 | 0.23 |
| chr1 | 185857191 | 185858416 | 1700056E22Rik | ENSMUSG00000044854  | -350 | 0.1  | 0.23 | 0.12 | 0.17 | 0.11 | 0.11 |
| chr1 | 186706440 | 186707045 | C130074G19Rik | ENSMUSG00000039349  | 355  | 0.12 | 0.11 | 0.12 | 0.16 | 0.11 | 0.18 |
| chr1 | 33814456  | 33814794  | Bag2          | ENSMUSG00000042215  | 14   | 0.25 | 0.09 | 0.13 | 0.16 | 0.07 | 0.1  |
| chr1 | 38954709  | 38955047  | Chst10        | ENSMUSG00000026080  | 120  | 0.1  | 0.05 | 0.07 | 0.12 | 0.06 | 0.11 |
| chr1 | 57026463  | 57026717  | Satb2         | ENSMUSG00000038331  | 94   | 0.14 | 0.35 | 0.08 | 0.16 | 0.08 | 0.19 |
| chr1 | 74939299  | 74939710  | Cryba2        | ENSMUSG00000006546  | -198 | 0.33 | 0.25 | 0.11 | 0.21 | 0.12 | 0.13 |
| chr1 | 179726065 | 179726925 | Adss          | ENSMUSG00000015961  | 137  | 0.1  | 0.12 | 0.07 | 0.13 | 0.07 | 0.14 |
| chr1 | 4797640   | 4798184   | Lypla1        | ENSMUSG00000025903  | 43   | 0.09 | 0.25 | 0.08 | 0.18 | 0.08 | 0.12 |
| chr1 | 78508402  | 78508645  | Mogat1        | ENSMUSG00000012187  | 81   | 0.09 | 0.12 | 0.13 | 0.13 | 0.06 | 0.22 |
| chr1 | 154749083 | 154751094 | Smg7          | ENSMUSG00000042772  | -312 | 0.22 | 0.27 | 0.11 | 0.18 | 0.23 | 0.17 |
| chr1 | 57831542  | 57832476  | Spats2l       | ENSMUSG00000038305  | 430  | 0.17 | 0.16 | 0.09 | 0.15 | 0.16 | 0.11 |
| chr1 | 72871267  | 72871511  | Igfbp2        | ENSMUSG00000039323  | 248  | 0.4  | 0.15 | 0.07 | 0.21 | 0.2  | 0.18 |
| chr1 | 75207379  | 75207640  | Stk16         | ENSMUSG00000026201  | 96   | 0.2  | 0.16 | 0.12 | 0.18 | 0.17 | 0.16 |
| chr1 | 135319634 | 135321021 | Sox13         | ENSMUSG00000070643  | 627  | 0.42 | 0.2  | 0.17 | 0.15 | 0.4  | 0.25 |
| chr1 | 160292679 | 160293006 | Astn1         | ENSMUSG00000026587  | 371  | 0.28 | 0.23 | 0.14 | 0.13 | 0.25 | 0.2  |
| chr1 | 182413327 | 182413708 | 6330403A02Rik | ENSMUSG00000053963  | 81   | 0.09 | 0.14 | 0.15 | 0.1  | 0.11 | 0.13 |
| chr1 | 193916148 | 193916632 | Gm16621       | ENSMUSG000000085764 | 137  | 0.05 | 0.09 | 0.1  | 0.1  | 0.07 | 0.11 |
| chr1 | 133964202 | 133964825 | Mfsd4         | ENSMUSG00000059149  | -110 | 0.1  | 0.29 | 0.12 | 0.18 | 0.09 | 0.22 |
| chr1 | 182834285 | 182834670 | Pycr2         | ENSMUSG00000026520  | 72   | 0.09 | 0.08 | 0.16 | 0.11 | 0.12 | 0.18 |
| chr1 | 33870975  | 33871535  | Zfp451        | ENSMUSG00000042197  | -201 | 0.14 | 0.09 | 0.09 | 0.15 | 0.13 | 0.14 |
| chr1 | 134212475 | 134213132 | Nuak2         | ENSMUSG00000009772  | 100  | 0.07 | 0.06 | 0.16 | 0.09 | 0.06 | 0.24 |
| chr1 | 154613057 | 154614391 | Rgl1          | ENSMUSG00000026482  | -289 | 0.11 | 0.1  | 0.1  | 0.17 | 0.1  | 0.13 |
| chr1 | 183771994 | 183772885 | Lbr           | ENSMUSG00000004880  | 93   | 0.09 | 0.07 | 0.08 | 0.13 | 0.08 | 0.1  |
| chr1 | 24593360  | 24594016  | Col19a1       | ENSMUSG00000026141  | 562  | 0.08 | 0.09 | 0.09 | 0.14 | 0.08 | 0.1  |
| chr1 | 34636374  | 34636685  | 1700101119Rik | ENSMUSG00000045815  | -71  | 0.16 | 0.09 | 0.08 | 0.12 | 0.11 | 0.12 |

|      |           |           |               |                     |       |      |      |      |      |      |      |
|------|-----------|-----------|---------------|---------------------|-------|------|------|------|------|------|------|
| chr1 | 72871936  | 72872227  | Igfbp2        | ENSMUSG00000039323  | 185   | 0.39 | 0.3  | 0.16 | 0.2  | 0.33 | 0.17 |
| chr1 | 39707286  | 39708060  | Creg2         | ENSMUSG00000050967  | 354   | 0.11 | 0.33 | 0.1  | 0.14 | 0.13 | 0.15 |
| chr1 | 189432876 | 189433561 | Esrrg         | ENSMUSG00000026610  | 310   | 0.08 | 0.08 | 0.08 | 0.13 | 0.09 | 0.09 |
| chr1 | 33776670  | 33777295  | Rab23         | ENSMUSG00000004768  | 255   | 0.16 | 0.12 | 0.09 | 0.13 | 0.15 | 0.09 |
| chr1 | 54251186  | 54252086  | Hecw2         | ENSMUSG000000042807 | 242   | 0.17 | 0.22 | 0.09 | 0.1  | 0.16 | 0.13 |
| chr1 | 140738075 | 140738646 | Lhx9          | ENSMUSG00000019230  | 646   | 1    | 0.36 | 0.14 | 0.25 | 0.41 | 0.19 |
| chr1 | 39957317  | 39958304  | Map4k4        | ENSMUSG00000026074  | 52    | 0.11 | 0.15 | 0.09 | 0.12 | 0.11 | 0.12 |
| chr1 | 58852426  | 58852696  | Casp8         | ENSMUSG00000026029  | 343   | 0.1  | 0.09 | 0.11 | 0.29 | 0.11 | 0.19 |
| chr1 | 59176666  | 59177324  | Als2cr4       | ENSMUSG000000038079 | -55   | 0.14 | 0.15 | 0.09 | 0.16 | 0.13 | 0.13 |
| chr1 | 169213895 | 169215283 | Uck2          | ENSMUSG00000026558  | 669   | 0.09 | 0.1  | 0.08 | 0.14 | 0.09 | 0.12 |
| chr1 | 192886526 | 192887234 | Tatdn3        | ENSMUSG00000026632  | -97   | 0.06 | 0.09 | 0.08 | 0.1  | 0.04 | 0.12 |
| chr1 | 36300736  | 36301257  | Uggt1         | ENSMUSG000000037470 | -44   | 0.06 | 0.09 | 0.12 | 0.1  | 0.05 | 0.15 |
| chr1 | 135027657 | 135028481 | Ppp1r15b      | ENSMUSG000000046062 | 349   | 0.06 | 0.09 | 0.12 | 0.16 | 0.06 | 0.16 |
| chr1 | 136391091 | 136391525 | Rabif         | ENSMUSG000000042229 | 83    | 0.11 | 0.09 | 0.09 | 0.2  | 0.12 | 0.13 |
| chr1 | 191993104 | 191993480 | Prox1         | ENSMUSG00000010175  | -14   | 0.09 | 0.11 | 0.13 | 0.17 | 0.15 | 0.15 |
| chr1 | 36766466  | 36766993  | Actr1b        | ENSMUSG000000037351 | -206  | 0.08 | 0.06 | 0.11 | 0.19 | 0.14 | 0.12 |
| chr1 | 125942028 | 125942710 | Dpp10         | ENSMUSG000000036815 | -233  | 0.13 | 0.09 | 0.18 | 0.11 | 0.1  | 0.27 |
| chr1 | 179187430 | 179189252 | Akt3          | ENSMUSG00000019699  | -7    | 0.11 | 0.14 | 0.1  | 0.15 | 0.12 | 0.17 |
| chr1 | 193048205 | 193048802 | D730003115Rik | ENSMUSG000000073478 | 150   | 0.11 | 0.15 | 0.11 | 0.08 | 0.09 | 0.18 |
| chr1 | 6349163   | 6349523   | Fam150a       | ENSMUSG000000087247 | -194  | 0.13 | 0.24 | 0.14 | 0.22 | 0.19 | 0.17 |
| chr1 | 39592432  | 39593210  | D1Bwg0212e    | ENSMUSG000000003135 | 174   | 0.1  | 0.15 | 0.15 | 0.17 | 0.1  | 0.18 |
| chr1 | 55293829  | 55294660  | Mars2         | ENSMUSG000000046994 | 223   | 0.09 | 0.09 | 0.11 | 0.15 | 0.1  | 0.14 |
| chr1 | 59819629  | 59821057  | Bmpr2         | ENSMUSG000000067336 | -1138 | 0.14 | 0.2  | 0.09 | 0.18 | 0.13 | 0.15 |
| chr1 | 74634207  | 74635046  | Zfp142        | ENSMUSG000000026135 | -100  | 0.18 | 0.11 | 0.08 | 0.27 | 0.24 | 0.15 |
| chr1 | 93355576  | 93356311  | Per2          | ENSMUSG000000055866 | -38   | 0.08 | 0.09 | 0.1  | 0.09 | 0.09 | 0.18 |
| chr1 | 122237037 | 122238458 | C1ql2         | ENSMUSG000000036907 | 588   | 0.13 | 0.22 | 0.12 | 0.16 | 0.13 | 0.15 |
| chr1 | 177810737 | 177811370 | Exo1          | ENSMUSG000000039748 | 144   | 0.09 | 0.09 | 0.1  | 0.22 | 0.07 | 0.17 |
| chr1 | 36568608  | 36569851  | Cnnm3         | ENSMUSG00000001138  | 517   | 0.08 | 0.09 | 0.09 | 0.1  | 0.08 | 0.1  |
| chr1 | 37356685  | 37357352  | Inpp4a        | ENSMUSG000000026113 | 308   | 0.14 | 0.1  | 0.09 | 0.22 | 0.15 | 0.17 |
| chr1 | 54495601  | 54495903  | Gtf3c3        | ENSMUSG000000041303 | 63    | 0.1  | 0.12 | 0.07 | 0.11 | 0.07 | 0.12 |

|      |           |           |               |                    |      |      |      |      |      |      |      |
|------|-----------|-----------|---------------|--------------------|------|------|------|------|------|------|------|
| chr1 | 66747326  | 66747925  | Rpe           | ENSMUSG00000026005 | 220  | 0.16 | 0.15 | 0.12 | 0.11 | 0.15 | 0.14 |
| chr1 | 92949205  | 92949779  | Lrrfip1       | ENSMUSG00000026305 | -529 | 0.07 | 0.33 | 0.08 | 0.14 | 0.09 | 0.16 |
| chr1 | 174562669 | 174563260 | Dusp23        | ENSMUSG00000026544 | 141  | 0.1  | 0.09 | 0.1  | 0.19 | 0.09 | 0.13 |
| chr1 | 194596834 | 194597332 | Hhat          | ENSMUSG00000037375 | 171  | 0.07 | 0.03 | 0.1  | 0.14 | 0.05 | 0.09 |
| chr1 | 6204511   | 6205413   | 4732440D04Rik | ENSMUSG00000090031 | -291 | 0.19 | 0.23 | 0.11 | 0.15 | 0.19 | 0.12 |
| chr1 | 34734915  | 34735264  | C230030N03Rik | ENSMUSG00000089955 | 56   | 0.09 | 0.07 | 0.1  | 0.15 | 0.07 | 0.11 |
| chr1 | 37921457  | 37922169  | Tsga10        | ENSMUSG00000060771 | -161 | 0.1  | 0.07 | 0.1  | 0.12 | 0.1  | 0.11 |
| chr1 | 63160059  | 63160923  | Ino80d        | ENSMUSG00000040865 | 338  | 0.11 | 0.11 | 0.11 | 0.1  | 0.1  | 0.15 |
| chr1 | 63411858  | 63412063  | Gm11605       | ENSMUSG00000081643 | -21  | 1    | 0.88 | 0.91 | 0.8  | 0.96 | 0.96 |
| chr1 | 91826657  | 91827973  | D130058E05Rik | ENSMUSG00000092627 | 506  | 0.11 | 0.1  | 0.09 | 0.1  | 0.11 | 0.1  |
| chr1 | 92895094  | 92895719  | Lrrfip1       | ENSMUSG00000026305 | 102  | 0.1  | 0.11 | 0.12 | 0.11 | 0.1  | 0.17 |
| chr1 | 94830838  | 94831525  | Capn10        | ENSMUSG00000026270 | 228  | 0.07 | 0.04 | 0.1  | 0.1  | 0.06 | 0.1  |
| chr1 | 137001445 | 137001888 | Lgr6          | ENSMUSG00000042793 | 187  | 0.07 | 0.1  | 0.09 | 0.06 | 0.08 | 0.09 |
| chr1 | 3661735   | 3662237   | Xkr4          | ENSMUSG00000051951 | -407 | 0.13 | 0.5  | 0.14 | 0.26 | 0.17 | 0.31 |
| chr1 | 9689866   | 9690962   | Mybl1         | ENSMUSG00000025912 | -379 | 0.15 | 0.1  | 0.09 | 0.2  | 0.17 | 0.15 |
| chr1 | 53009470  | 53009801  | 1700019D03Rik | ENSMUSG00000043629 | 53   | 0.05 | 0.06 | 0.12 | 0.1  | 0.09 | 0.22 |
| chr1 | 89110391  | 89110957  | Eif4e2        | ENSMUSG00000026254 | 185  | 0.19 | 0.17 | 0.16 | 0.17 | 0.19 | 0.2  |
| chr1 | 90597528  | 90599089  | Arl4c         | ENSMUSG00000049866 | 143  | 0.09 | 0.08 | 0.08 | 0.14 | 0.09 | 0.13 |
| chr1 | 180117563 | 180118384 | Pppde1        | ENSMUSG00000026502 | 310  | 0.12 | 0.17 | 0.09 | 0.19 | 0.1  | 0.09 |
| chr1 | 187186708 | 187187364 | 4930532G15Rik | ENSMUSG00000091047 | -292 | 0.11 | 0.12 | 0.08 | 0.13 | 0.08 | 0.09 |
| chr1 | 4487028   | 4487689   | Sox17         | ENSMUSG00000025902 | -864 | 0.09 | 0.18 | 0.08 | 0.18 | 0.08 | 0.2  |
| chr1 | 7387827   | 7388675   | Gm16899       | ENSMUSG00000086461 | -369 | 0.11 | 0.25 | 0.2  | 0.23 | 0.1  | 0.17 |
| chr1 | 13116379  | 13116750  | Prdm14        | ENSMUSG00000042414 | 680  | 0.1  | 0.19 | 0.11 | 0.22 | 0.1  | 0.18 |
| chr1 | 13579243  | 13580258  | Tram1         | ENSMUSG00000025935 | 195  | 0.1  | 0.18 | 0.17 | 0.18 | 0.1  | 0.21 |
| chr1 | 14299828  | 14300117  | Eya1          | ENSMUSG00000025932 | 228  | 0.07 | 0.11 | 0.08 | 0.06 | 0.08 | 0.18 |
| chr1 | 16509814  | 16510174  | Stau2         | ENSMUSG00000025920 | 107  | 0.08 | 0.11 | 0.08 | 0.15 | 0.08 | 0.11 |
| chr1 | 17135548  | 17135876  | Gdap1         | ENSMUSG00000025777 | 227  | 0.46 | 0.45 | 0.27 | 0.49 | 0.55 | 0.28 |
| chr1 | 22812521  | 22813203  | Rims1         | ENSMUSG00000041670 | -299 | 0.07 | 0.1  | 0.1  | 0.16 | 0.07 | 0.12 |
| chr1 | 23262857  | 23263893  | Gm6420        | ENSMUSG00000073729 | -130 | 0.19 | 0.16 | 0.12 | 0.25 | 0.18 | 0.19 |
| chr1 | 24012210  | 24012553  | 1110058L19Rik | ENSMUSG00000026154 | 114  | 0.12 | 0.2  | 0.11 | 0.22 | 0.1  | 0.17 |

|      |          |          |               |                    |      |      |      |      |      |      |      |
|------|----------|----------|---------------|--------------------|------|------|------|------|------|------|------|
| chr1 | 24106480 | 24107395 | Fam135a       | ENSMUSG00000026153 | 243  | 0.1  | 0.1  | 0.08 | 0.15 | 0.1  | 0.13 |
| chr1 | 34068329 | 34068706 | Dst           | ENSMUSG00000026131 | -153 | 0.23 | 0.23 | 0.18 | 0.15 | 0.23 | 0.15 |
| chr1 | 34234787 | 34235038 | Gm16750       | ENSMUSG00000085306 | 206  | 0.92 | 1    | 0.8  | 1    | 1    | 0.86 |
| chr1 | 34899379 | 34900010 | Fam168b       | ENSMUSG00000037503 | 201  | 0.09 | 0.07 | 0.11 | 0.14 | 0.08 | 0.13 |
| chr1 | 34906740 | 34907023 | Plekhh2       | ENSMUSG00000026123 | 77   | 0.12 | 0.06 | 0.06 | 0.18 | 0.11 | 0.07 |
| chr1 | 36501720 | 36502153 | Lman2l        | ENSMUSG00000001143 | 180  | 0.09 | 0.11 | 0.12 | 0.18 | 0.1  | 0.15 |
| chr1 | 36528111 | 36529000 | Cnnm4         | ENSMUSG00000037408 | 113  | 0.27 | 0.13 | 0.14 | 0.29 | 0.25 | 0.25 |
| chr1 | 37947207 | 37947627 | Mitd1         | ENSMUSG00000026088 | -165 | 0.11 | 0.14 | 0.11 | 0.19 | 0.11 | 0.12 |
| chr1 | 40323401 | 40323721 | Il1r1         | ENSMUSG00000026072 | 130  | 0.11 | 0.05 | 0.08 | 0.14 | 0.08 | 0.27 |
| chr1 | 44608423 | 44609336 | Gulp1         | ENSMUSG00000056870 | 341  | 0.17 | 0.21 | 0.13 | 0.34 | 0.15 | 0.17 |
| chr1 | 50983891 | 50984906 | Tmeff2        | ENSMUSG00000026109 | 35   | 0.1  | 0.12 | 0.1  | 0.17 | 0.11 | 0.15 |
| chr1 | 53353632 | 53354223 | Pms1          | ENSMUSG00000026098 | -116 | 0.25 | 0.09 | 0.13 | 0.17 | 0.25 | 0.19 |
| chr1 | 58501925 | 58502389 | Nif3l1        | ENSMUSG00000026036 | 162  | 0.04 | 0.1  | 0.07 | 0.13 | 0.05 | 0.11 |
| chr1 | 60400099 | 60400501 | Cyp20a1       | ENSMUSG00000049439 | 133  | 0.22 | 0.09 | 0.07 | 0.11 | 0.19 | 0.12 |
| chr1 | 63223121 | 63224001 | Ndufs1        | ENSMUSG00000025968 | -320 | 0.08 | 0.08 | 0.12 | 0.2  | 0.09 | 0.2  |
| chr1 | 64168187 | 64168716 | Klf7          | ENSMUSG00000025959 | -386 | 0.07 | 0.08 | 0.08 | 0.09 | 0.06 | 0.1  |
| chr1 | 64737108 | 64738159 | 2810408l11Rik | ENSMUSG00000087213 | -451 | 0.09 | 0.08 | 0.08 | 0.14 | 0.09 | 0.13 |
| chr1 | 65003072 | 65003444 | Plekhh3       | ENSMUSG00000051344 | 43   | 0.12 | 0.06 | 0.08 | 0.23 | 0.11 | 0.21 |
| chr1 | 69153608 | 69154629 | Erbp4         | ENSMUSG00000062209 | 212  | 0.15 | 0.21 | 0.1  | 0.15 | 0.14 | 0.15 |
| chr1 | 69873437 | 69873776 | Spag16        | ENSMUSG00000053153 | 44   | 0.22 | 0.17 | 0.08 | 0.18 | 0.21 | 0.14 |
| chr1 | 71603522 | 71603941 | Atic          | ENSMUSG00000026192 | 7    | 0.5  | 0.26 | 0.11 | 0.15 | 1    | 0.17 |
| chr1 | 74947129 | 74947558 | Mir375        | ENSMUSG00000065616 | -43  | 0.11 | 0.5  | 0.07 | 0.14 | 0.12 | 0.13 |
| chr1 | 75501776 | 75502959 | Obsl1         | ENSMUSG00000026211 | -151 | 0.06 | 0.06 | 0.08 | 0.14 | 0.06 | 0.11 |
| chr1 | 78306638 | 78307313 | Sgpp2         | ENSMUSG00000032908 | 54   | 0.14 | 0.07 | 0.09 | 0.17 | 0.13 | 0.16 |
| chr1 | 78654197 | 78655124 | Acsl3         | ENSMUSG00000032883 | 260  | 0.07 | 0.11 | 0.07 | 0.12 | 0.07 | 0.07 |
| chr1 | 88478719 | 88479213 | Pde6d         | ENSMUSG00000026239 | 126  | 0.15 | 0.13 | 0.16 | 0.17 | 0.14 | 0.16 |
| chr1 | 88483612 | 88484042 | Cops7b        | ENSMUSG00000026240 | 152  | 0.15 | 1    | 0.27 | 0.26 | 0.16 | 0.13 |
| chr1 | 89904782 | 89905176 | Usp40         | ENSMUSG00000005501 | 130  | 0.29 | 0.23 | 0.07 | 0.14 | 0.3  | 0.09 |
| chr1 | 92499751 | 92500285 | Cops8         | ENSMUSG00000034432 | 18   | 0.14 | 0.46 | 0.11 | 0.14 | 0.14 | 0.13 |
| chr1 | 93194472 | 93195371 | Scly          | ENSMUSG00000026307 | 6    | 0.2  | 0.09 | 0.12 | 0.21 | 0.15 | 0.1  |



|      |           |           |          |                    |      |      |      |      |      |      |      |
|------|-----------|-----------|----------|--------------------|------|------|------|------|------|------|------|
| chr1 | 94727823  | 94728130  | Gpc1     | ENSMUSG00000034220 | -246 | 0.12 | 0.08 | 0.12 | 0.44 | 0.14 | 0.2  |
| chr1 | 94998157  | 94998686  | Kif1a    | ENSMUSG00000014602 | -13  | 0.28 | 0.1  | 0.14 | 0.11 | 0.25 | 0.13 |
| chr1 | 99991624  | 99992468  | Pam      | ENSMUSG00000026335 | 152  | 0.09 | 0.09 | 0.07 | 0.11 | 0.09 | 0.11 |
| chr1 | 108609070 | 108609524 | Bcl2     | ENSMUSG00000057329 | 1554 | 0.14 | 0.14 | 0.26 | 0.14 | 0.17 | 0.34 |
| chr1 | 120207574 | 120208110 | Tsn      | ENSMUSG00000026374 | -133 | 0.19 | 0.19 | 0.11 | 0.12 | 0.17 | 0.09 |
| chr1 | 120285796 | 120286295 | Clasp1   | ENSMUSG00000064302 | 410  | 0.31 | 0.08 | 0.1  | 0.28 | 0.26 | 0.18 |
| chr1 | 120355854 | 120356371 | U4atac   | ENSMUSG00000080542 | -270 | 0.07 | 0.16 | 0.1  | 0.1  | 0.04 | 0.12 |
| chr1 | 120949975 | 120950360 | Gli2     | ENSMUSG00000048402 | 29   | 0.16 | 0.1  | 0.07 | 0.26 | 0.15 | 0.1  |
| chr1 | 121544930 | 121545632 | Epb4.1l5 | ENSMUSG00000026383 | 296  | 0.12 | 0.2  | 0.1  | 0.21 | 0.13 | 0.19 |
| chr1 | 121809730 | 121809988 | Tmem177  | ENSMUSG00000036975 | -74  | 0.41 | 0.39 | 0.21 | 0.15 | 0.39 | 0.21 |
| chr1 | 123423992 | 123424532 | Htr5b    | ENSMUSG00000050534 | 780  | 0.28 | 0.2  | 0.1  | 0.23 | 0.27 | 0.31 |
| chr1 | 127456966 | 127457923 | Slc35f5  | ENSMUSG00000026342 | -149 | 0.25 | 0.29 | 0.18 | 0.26 | 0.26 | 0.21 |
| chr1 | 134287967 | 134288459 | Tmcc2    | ENSMUSG00000042066 | -355 | 0.06 | 0.1  | 0.07 | 0.07 | 0.06 | 0.1  |
| chr1 | 136131281 | 136131666 | Adora1   | ENSMUSG00000042429 | -318 | 0.14 | 0.13 | 0.1  | 0.11 | 0.13 | 0.09 |
| chr1 | 136605450 | 136606000 | Syt2     | ENSMUSG00000026452 | -152 | 0.12 | 0.09 | 0.17 | 0.2  | 0.12 | 0.17 |
| chr1 | 138849492 | 138849711 | Nr5a2    | ENSMUSG00000026398 | 606  | 0.2  | 0.17 | 0.07 | 0.2  | 0.19 | 0.27 |
| chr1 | 145549891 | 145550306 | Cdc73    | ENSMUSG00000026361 | -75  | 0.18 | 0.55 | 0.18 | 0.26 | 0.16 | 0.12 |
| chr1 | 154472038 | 154472418 | Rgl1     | ENSMUSG00000026482 | -69  | 0.07 | 0.17 | 0.14 | 0.21 | 0.06 | 0.19 |
| chr1 | 158404145 | 158404524 | Soat1    | ENSMUSG00000026600 | 125  | 0.31 | 0.78 | 0.16 | 0.22 | 0.3  | 0.17 |
| chr1 | 160286170 | 160286374 | Fam5b    | ENSMUSG0000004031  | 119  | 0.15 | 0.13 | 0.11 | 0.12 | 0.13 | 0.1  |
| chr1 | 164407696 | 164408210 | Gm10176  | ENSMUSG00000066752 | 142  | 0.16 | 0.21 | 0.17 | 0.14 | 0.17 | 0.2  |
| chr1 | 164500484 | 164501733 | Vamp4    | ENSMUSG00000026696 | 462  | 0.1  | 0.11 | 0.11 | 0.16 | 0.09 | 0.14 |
| chr1 | 166237588 | 166237815 | Blzf1    | ENSMUSG00000026577 | -99  | 0.13 | 0.24 | 0.12 | 0.19 | 0.11 | 0.11 |
| chr1 | 167693836 | 167694350 | Creg1    | ENSMUSG00000040713 | 216  | 0.33 | 0.33 | 0.09 | 0.07 | 0.2  | 0.13 |
| chr1 | 168309061 | 168309285 | Tada1    | ENSMUSG00000026563 | -55  | 0.16 | 0.22 | 0.08 | NA   | 0.12 | 0.11 |
| chr1 | 169280262 | 169280672 | Aldh9a1  | ENSMUSG00000026687 | 345  | 0.08 | 0.09 | 0.09 | 0.14 | 0.09 | 0.15 |
| chr1 | 169618405 | 169619386 | Lmx1a    | ENSMUSG00000026686 | -475 | 0.08 | 0.08 | 0.1  | 0.16 | 0.08 | 0.12 |
| chr1 | 172104740 | 172105420 | Uap1     | ENSMUSG00000026670 | -160 | 0.12 | 0.09 | 0.09 | 0.12 | 0.11 | 0.09 |
| chr1 | 173224601 | 173224949 | Ufc1     | ENSMUSG00000062963 | 296  | 0.12 | 0.11 | 0.16 | 0.24 | 0.11 | 0.19 |
| chr1 | 173259020 | 173259619 | Dedd     | ENSMUSG00000013973 | 43   | 0.12 | 0.17 | 0.14 | 0.14 | 0.11 | 0.12 |

|      |           |           |               |                    |       |      |      |      |      |      |      |
|------|-----------|-----------|---------------|--------------------|-------|------|------|------|------|------|------|
| chr1 | 173275569 | 173276032 | Nit1          | ENSMUSG00000013997 | -187  | 0.39 | 0.19 | 0.09 | 0.5  | 0.33 | 0.21 |
| chr1 | 173341340 | 173342002 | Usf1          | ENSMUSG00000026641 | 227   | 0.08 | 0.1  | 0.09 | 0.18 | 0.08 | 0.17 |
| chr1 | 175297312 | 175297930 | Cadm3         | ENSMUSG00000005338 | 110   | 0.5  | 0.85 | 0.16 | 0.18 | 0.4  | 0.15 |
| chr1 | 176433442 | 176433760 | Fmn2          | ENSMUSG00000028354 | 1624  | 0.05 | 0.08 | 0.12 | 0.07 | 0.05 | 0.19 |
| chr1 | 177622216 | 177623212 | Opn3          | ENSMUSG00000026525 | -9    | 0.1  | 0.09 | 0.1  | 0.18 | 0.1  | 0.14 |
| chr1 | 182498859 | 182499622 | Parp1         | ENSMUSG00000026496 | 154   | 0.35 | 0.24 | 0.12 | 0.31 | 0.4  | 0.17 |
| chr1 | 182824555 | 182824929 | Lefty2        | ENSMUSG00000066652 | 153   | 0.08 | 0.14 | 0.07 | 0.12 | 0.08 | 0.13 |
| chr1 | 187152742 | 187153317 | Iars2         | ENSMUSG00000026618 | 246   | 0.19 | 0.16 | 0.1  | 0.17 | 0.2  | 0.16 |
| chr1 | 187278815 | 187279540 | Gm2061        | ENSMUSG00000085692 | 270   | 0.12 | 0.18 | 0.09 | 0.2  | 0.13 | 0.18 |
| chr1 | 188791268 | 188792185 | D1Pas1        | ENSMUSG00000039224 | 431   | 0.98 | 0.93 | 0.94 | 0.99 | 0.98 | 0.97 |
| chr1 | 189431192 | 189431473 | Esrrg         | ENSMUSG00000026610 | -1338 | 0.25 | 1    | 0.38 | 0.56 | 0.14 | 0.33 |
| chr1 | 192921735 | 192922555 | Batf3         | ENSMUSG00000026630 | -148  | 0.16 | 0.26 | 0.17 | 0.23 | 0.16 | 0.18 |
| chr1 | 193006302 | 193008249 | Atf3          | ENSMUSG00000026628 | -288  | 0.18 | 0.24 | 0.14 | 0.22 | 0.18 | 0.16 |
| chr1 | 194681080 | 194681649 | Gm15867       | ENSMUSG00000089812 | 242   | 0.1  | 0.15 | 0.08 | 0.17 | 0.11 | 0.16 |
| chr1 | 3660700   | 3661155   | Xkr4          | ENSMUSG00000051951 | 652   | NA   | 0.21 | 0.11 | 0.22 | NA   | 0.11 |
| chr1 | 4775457   | 4775895   | Mrpl15        | ENSMUSG00000033845 | 97    | NA   | NA   | NA   | 1    | 0.5  | 0.75 |
| chr1 | 16646845  | 16647124  | Tceb1         | ENSMUSG00000079658 | -38   | NA   | 0.14 | 0.18 | 0.4  | NA   | 0.13 |
| chr1 | 19094652  | 19095004  | Gm15825       | ENSMUSG00000089787 | 93    | NA   | 0.33 | 0.09 | 0.25 | 0.33 | 0.11 |
| chr1 | 37086092  | 37086331  | Vwa3b         | ENSMUSG00000050122 | 62    | NA   | 0.33 | NA   | 0.1  | NA   | 0.15 |
| chr1 | 40382654  | 40382864  | Il1rl2        | ENSMUSG00000070942 | 1287  | 0.17 | 0.14 | 0.39 | 0.31 | NA   | 0.17 |
| chr1 | 42751578  | 42752106  | RP23-71K9.1   | ENSMUSG00000093778 | -172  | NA   | 0.18 | 0.12 | 0.16 | 0.11 | 0.13 |
| chr1 | 43155325  | 43155799  | Tgfbra1       | ENSMUSG00000070939 | -95   | NA   | NA   | 0.15 | NA   | 0.83 | 0.23 |
| chr1 | 52687385  | 52687786  | Tmem194b      | ENSMUSG00000043015 | 36    | NA   | NA   | 0.18 | 0.22 | 0.5  | 0.31 |
| chr1 | 57033948  | 57034236  | Satb2         | ENSMUSG00000038331 | 1402  | NA   | 0.05 | 0.1  | 0.17 | 0.14 | 0.12 |
| chr1 | 58642763  | 58643271  | Fam126b       | ENSMUSG00000038174 | 18    | NA   | 1    | NA   | 1    | 1    | NA   |
| chr1 | 59741700  | 59742059  | Nop58         | ENSMUSG00000026020 | 26    | NA   | NA   | 0.27 | 1    | NA   | 0.5  |
| chr1 | 65040979  | 65041201  | Rpl10a-ps1    | ENSMUSG00000084416 | 88    | NA   | NA   | 1    | NA   | NA   | 1    |
| chr1 | 66221885  | 66222219  | Mtap2         | ENSMUSG00000015222 | 165   | NA   | 0.17 | 0.16 | 0.23 | 0.07 | 0.26 |
| chr1 | 72272508  | 72272792  | U2            | ENSMUSG00000075752 | -164  | NA   | NA   | 0.29 | NA   | 1    | 0.2  |
| chr1 | 72290396  | 72290771  | D230017M19Rik | ENSMUSG00000085769 | -12   | NA   | 1    | 0.21 | 1    | NA   | 0.33 |

|      |           |           |            |                    |       |      |      |      |      |      |      |
|------|-----------|-----------|------------|--------------------|-------|------|------|------|------|------|------|
| chr1 | 72301319  | 72301560  | AC120136.3 | ENSMUSG00000093333 | -143  | 1    | NA   | 0.09 | 0.14 | NA   | 0.22 |
| chr1 | 72920272  | 72920540  | Igfbp5     | ENSMUSG00000026185 | 443   | NA   | 0.22 | 0.1  | 0.11 | 0.5  | 0.15 |
| chr1 | 74760192  | 74760405  | Cyp27a1    | ENSMUSG00000026170 | 150   | NA   | NA   | 0.43 | 1    | NA   | 1    |
| chr1 | 74795306  | 74795619  | Prkag3     | ENSMUSG00000006542 | -21   | NA   | NA   | 0.44 | NA   | NA   | 0.5  |
| chr1 | 75483285  | 75483523  | Obsl1      | ENSMUSG00000026211 | 404   | NA   | NA   | 0.12 | NA   | 0.5  | 0.2  |
| chr1 | 78193206  | 78193862  | Pax3       | ENSMUSG00000004872 | -121  | NA   | 0.12 | 0.12 | 0.29 | 0.15 | 0.15 |
| chr1 | 78485058  | 78485491  | Farsb      | ENSMUSG00000026245 | 147   | NA   | 0.12 | 0.14 | 0.12 | NA   | 0.17 |
| chr1 | 88051183  | 88051616  | Armc9      | ENSMUSG00000062590 | 44    | NA   | 0.17 | 0.1  | 0.23 | 0.5  | 0.18 |
| chr1 | 93310790  | 93311019  | Hes6       | ENSMUSG00000067071 | -289  | 0.33 | NA   | 0.08 | 0.18 | NA   | 0.14 |
| chr1 | 94745011  | 94745360  | Mir149     | ENSMUSG00000065470 | -1770 | NA   | NA   | 0.16 | 0.2  | 0.17 | 0.5  |
| chr1 | 95408353  | 95408631  | Farp2      | ENSMUSG00000034066 | -164  | NA   | NA   | 0.07 | NA   | NA   | NA   |
| chr1 | 106665058 | 106665497 | Cdh20      | ENSMUSG00000050840 | 171   | NA   | NA   | 0.17 | 1    | NA   | 0.17 |
| chr1 | 108610233 | 108610809 | Bcl2       | ENSMUSG00000057329 | 330   | NA   | 1    | 0.16 | 0.15 | 0.12 | 0.18 |
| chr1 | 111879009 | 111879805 | Cdh7       | ENSMUSG00000026312 | 120   | NA   | 0.71 | 0.56 | 0.75 | 0.41 | 0.48 |
| chr1 | 113761063 | 113761573 | Dsel       | ENSMUSG00000038702 | 168   | 0.5  | 0.11 | 0.12 | 0.12 | NA   | 0.19 |
| chr1 | 120218333 | 120218634 | Mki67ip    | ENSMUSG00000026377 | 67    | 1    | 0.21 | 0.5  | 1    | NA   | 0.67 |
| chr1 | 120285336 | 120285582 | Clasp1     | ENSMUSG00000064302 | -176  | NA   | 0.25 | 0.11 | 0.26 | 0.14 | 0.18 |
| chr1 | 122238944 | 122239216 | C1ql2      | ENSMUSG00000036907 | 1921  | 0.08 | 1    | 0.12 | 0.29 | NA   | 0.12 |
| chr1 | 123464169 | 123464658 | Ddx18      | ENSMUSG00000001674 | -114  | NA   | 0.12 | 0.08 | 0.15 | 0.27 | 0.1  |
| chr1 | 129765264 | 129765658 | Rab3gap1   | ENSMUSG00000036104 | 111   | NA   | NA   | 1    | NA   | 1    | 0.67 |
| chr1 | 129935110 | 129935357 | Rpl28-ps1  | ENSMUSG00000058603 | 87    | 1    | NA   | 1    | NA   | NA   | 1    |
| chr1 | 133724187 | 133724866 | Slc41a1    | ENSMUSG00000013275 | -28   | NA   | 0.07 | 0.1  | 0.18 | 0.08 | 0.23 |
| chr1 | 133763803 | 133764065 | Rab711     | ENSMUSG00000026433 | 117   | NA   | 0.58 | 0.44 | NA   | NA   | 0.46 |
| chr1 | 134439361 | 134439584 | Cntn2      | ENSMUSG00000053024 | 44    | NA   | 0.43 | 0.14 | NA   | 0.29 | 0.31 |
| chr1 | 136852088 | 136852568 | Ppp1r12b   | ENSMUSG00000073557 | 100   | NA   | NA   | 0.15 | NA   | 0.47 | 0.12 |
| chr1 | 136858983 | 136859329 | Ube2t      | ENSMUSG00000026429 | 14    | NA   | NA   | 0.06 | 0.13 | NA   | 0.08 |
| chr1 | 137210173 | 137210493 | Timm17a    | ENSMUSG00000062580 | -65   | 0.33 | 0.5  | 0.17 | NA   | NA   | 0.08 |
| chr1 | 137271492 | 137271742 | Shisa4     | ENSMUSG00000041889 | 37    | NA   | 0.11 | 0.29 | NA   | NA   | NA   |
| chr1 | 138521213 | 138521579 | Gm17718    | ENSMUSG00000091667 | -169  | NA   | 0.5  | 0.25 | 0.54 | NA   | 0.14 |
| chr1 | 152840408 | 152840729 | Hmcn1      | ENSMUSG00000066842 | -3    | NA   | 0.1  | 0.1  | 0.16 | 0.1  | 0.16 |

|       |           |           |         |                    |      |      |      |      |      |      |      |
|-------|-----------|-----------|---------|--------------------|------|------|------|------|------|------|------|
| chr1  | 155396678 | 155396967 | Npl     | ENSMUSG00000042684 | 22   | NA   | NA   | 0.11 | 0.67 | NA   | 0.14 |
| chr1  | 163657577 | 163657812 | Gm15429 | ENSMUSG00000040323 | -74  | NA   | NA   | 0.5  | 1    | NA   | 1    |
| chr1  | 166178750 | 166179046 | Sic19a2 | ENSMUSG00000040918 | -279 | NA   | 0.25 | 0.13 | 0.15 | 0.39 | 0.17 |
| chr1  | 166387797 | 166388868 | Atp1b1  | ENSMUSG00000026576 | 154  | NA   | 0.5  | 0.2  | 0.2  | 0.21 | 0.17 |
| chr1  | 169324202 | 169324552 | Mgst3   | ENSMUSG00000026688 | -405 | 1    | NA   | 0.12 | 1    | NA   | 0.1  |
| chr1  | 174242460 | 174242763 | Igsf8   | ENSMUSG00000038034 | 113  | NA   | NA   | NA   | 1    | NA   | 1    |
| chr1  | 174270996 | 174271325 | Kcnj10  | ENSMUSG00000044708 | -181 | NA   | 0.44 | 0.09 | 0.14 | NA   | 0.21 |
| chr1  | 174430209 | 174430991 | Tagln2  | ENSMUSG00000026547 | 422  | NA   | NA   | 0.21 | 0.26 | 0.2  | 0.27 |
| chr10 | 20878782  | 20881122  | Myb     | ENSMUSG00000019982 | 838  | 0.25 | 0.18 | 0.13 | 0.22 | 0.1  | 0.12 |
| chr10 | 62254394  | 62255293  | Ccar1   | ENSMUSG00000020074 | 273  | 0.22 | 0.15 | 0.15 | 0.18 | 0.51 | 0.15 |
| chr10 | 62485769  | 62487041  | Hnrnp3  | ENSMUSG00000020069 | 190  | 0.28 | 0.16 | 0.09 | 0.12 | 0.09 | 0.16 |
| chr10 | 80720011  | 80720602  | Matk    | ENSMUSG00000004933 | 262  | 0.54 | 0.15 | 0.12 | 0.24 | 0.12 | 0.14 |
| chr10 | 127805540 | 127806317 | Coq10a  | ENSMUSG00000039914 | 1160 | 0.35 | 0.28 | 0.13 | 0.16 | 0.14 | 0.16 |
| chr10 | 85379167  | 85379967  | Prdm4   | ENSMUSG00000035529 | 123  | 0.21 | 0.17 | 0.1  | 0.16 | 0.09 | 0.16 |
| chr10 | 41994537  | 41998359  | Foxo3   | ENSMUSG00000048756 | 54   | 0.22 | 0.11 | 0.1  | 0.11 | 0.1  | 0.13 |
| chr10 | 36693945  | 36695064  | Hdac2   | ENSMUSG00000019777 | 154  | 0.29 | 0.16 | 0.12 | 0.17 | 0.12 | 0.13 |
| chr10 | 127495762 | 127496925 | Ptges3  | ENSMUSG00000071072 | 333  | 0.15 | 0.27 | 0.13 | 0.21 | 0.31 | 0.16 |
| chr10 | 93977441  | 93978283  | Tmcc3   | ENSMUSG00000020023 | 260  | 0.27 | 0.24 | 0.11 | 0.13 | 0.13 | 0.15 |
| chr10 | 85484515  | 85485162  | Fbxo7   | ENSMUSG00000001786 | 121  | 0.29 | 0.12 | 0.11 | 0.18 | 0.07 | 0.12 |
| chr10 | 42481273  | 42482128  | Sec63   | ENSMUSG00000019802 | 398  | 0.09 | 0.09 | 0.12 | 0.19 | 0.57 | 0.13 |
| chr10 | 13588558  | 13588961  | Aig1    | ENSMUSG00000019806 | -131 | 0.08 | 0.11 | 0.08 | 0.11 | 0.24 | 0.14 |
| chr10 | 57514537  | 57514806  | Smpdl3a | ENSMUSG00000019872 | 297  | 0.64 | 0.48 | 0.09 | 0.16 | 0.2  | 0.23 |
| chr10 | 98569415  | 98570375  | Poc1b   | ENSMUSG00000019952 | 225  | 0.32 | 0.23 | 0.11 | 0.21 | 0.15 | 0.16 |
| chr10 | 13684371  | 13687422  | Hivep2  | ENSMUSG00000015501 | -289 | 0.31 | 0.17 | 0.13 | 0.15 | 0.16 | 0.16 |
| chr10 | 43198189  | 43199901  | Bend3   | ENSMUSG00000038214 | 99   | 0.43 | 0.27 | 0.14 | 0.16 | 0.19 | 0.15 |
| chr10 | 6605533   | 6606271   | Plekhg1 | ENSMUSG00000040624 | -26  | 0.49 | 0.68 | 0.2  | 0.37 | 0.21 | 0.28 |
| chr10 | 84646996  | 84648235  | Cry1    | ENSMUSG00000020038 | 184  | 0.17 | 0.16 | 0.11 | 0.12 | 0.1  | 0.11 |
| chr10 | 77084824  | 77085609  | Ube2g2  | ENSMUSG00000009293 | 196  | 0.24 | 0.16 | 0.09 | 0.14 | 0.1  | 0.11 |
| chr10 | 12588749  | 12589455  | Utrn    | ENSMUSG00000019820 | 61   | 0.27 | 0.19 | 0.11 | 0.16 | 0.12 | 0.15 |
| chr10 | 7675144   | 7676706   | Tab2    | ENSMUSG00000015755 | -234 | 0.2  | 0.16 | 0.09 | 0.15 | 0.1  | 0.11 |

|       |           |           |               |                    |      |      |      |      |      |      |      |
|-------|-----------|-----------|---------------|--------------------|------|------|------|------|------|------|------|
| chr10 | 80805720  | 80806288  | Gipc3         | ENSMUSG00000034872 | 7    | 0.28 | 0.17 | 0.1  | 0.14 | 0.1  | 0.13 |
| chr10 | 94977296  | 94978527  | Ube2n         | ENSMUSG00000074781 | 132  | 0.16 | 0.17 | 0.11 | 0.15 | 0.08 | 0.16 |
| chr10 | 58684022  | 58685535  | 10-Sep        | ENSMUSG00000019917 | -183 | 0.39 | 0.14 | 0.11 | 0.19 | 0.16 | 0.14 |
| chr10 | 39450929  | 39452940  | E130307A14Rik | ENSMUSG00000087177 | -352 | 0.15 | 0.14 | 0.11 | 0.13 | 0.08 | 0.15 |
| chr10 | 80729347  | 80729719  | Mrpl54        | ENSMUSG00000034932 | 136  | 0.38 | 0.14 | 0.18 | 0.31 | 0.12 | 0.15 |
| chr10 | 80260431  | 80261794  | Sf3a2         | ENSMUSG00000020211 | 169  | 0.25 | 0.24 | 0.1  | 0.14 | 0.1  | 0.14 |
| chr10 | 11063094  | 11063610  | Epm2a         | ENSMUSG00000055493 | 150  | 0.25 | 0.12 | 0.09 | 0.12 | 0.09 | 0.13 |
| chr10 | 58275006  | 58276847  | Gm9987        | ENSMUSG00000055958 | -36  | 0.23 | 0.3  | 0.12 | 0.19 | 0.1  | 0.18 |
| chr10 | 74979793  | 74980335  | 1110038D17Rik | ENSMUSG00000033416 | -149 | 0.31 | 0.22 | 0.13 | 0.26 | 0.1  | 0.16 |
| chr10 | 25079390  | 25080402  | Epb4.1l2      | ENSMUSG00000019978 | 292  | 0.28 | 0.15 | 0.11 | 0.17 | 0.11 | 0.14 |
| chr10 | 61111138  | 61111851  | Ppa1          | ENSMUSG00000020089 | 194  | 0.35 | 0.17 | 0.09 | 0.23 | 0.12 | 0.15 |
| chr10 | 114821307 | 114823017 | Thap2         | ENSMUSG00000020137 | -671 | 0.19 | 0.19 | 0.12 | 0.18 | 0.09 | 0.14 |
| chr10 | 41022660  | 41023125  | Fig4          | ENSMUSG00000038417 | 155  | 1    | 0.06 | 0.11 | 0.1  | 0.11 | 0.2  |
| chr10 | 61440797  | 61442050  | Col13a1       | ENSMUSG00000058806 | -554 | 0.4  | 0.16 | 0.15 | 0.15 | 0.2  | 0.17 |
| chr10 | 30562146  | 30563043  | Hey2          | ENSMUSG00000019789 | 13   | 0.09 | 0.19 | 0.13 | 0.14 | 0.34 | 0.17 |
| chr10 | 128110841 | 128111049 | Suox          | ENSMUSG00000049858 | 29   | 0.75 | NA   | 0.11 | 0.14 | 0.05 | 0.14 |
| chr10 | 12912594  | 12913040  | Ltv1          | ENSMUSG00000019814 | 126  | 0.3  | 0.21 | 0.14 | 0.18 | 0.11 | 0.13 |
| chr10 | 79755055  | 79755648  | Rps15         | ENSMUSG00000063457 | 175  | 0.23 | 0.23 | 0.15 | 0.18 | 0.09 | 0.14 |
| chr10 | 80023681  | 80024632  | Rexo1         | ENSMUSG00000047417 | 126  | 0.7  | 0.35 | 0.17 | 0.24 | 0.28 | 0.24 |
| chr10 | 107598638 | 107599929 | Ppp1r12a      | ENSMUSG00000019907 | 34   | 0.25 | 0.16 | 0.12 | 0.16 | 0.17 | 0.17 |
| chr10 | 43723294  | 43724261  | Gm10812       | ENSMUSG00000075162 | -183 | 0.21 | 0.11 | 0.09 | 0.13 | 0.09 | 0.17 |
| chr10 | 80052691  | 80053159  | Fam108a       | ENSMUSG00000003346 | 124  | 0.42 | 0.27 | 0.13 | 0.21 | 0.11 | 0.16 |
| chr10 | 20672222  | 20672764  | Ahi1          | ENSMUSG00000019986 | 102  | 0.18 | 0.11 | 0.11 | 0.12 | 0.09 | 0.12 |
| chr10 | 74674649  | 74675192  | Specc1l       | ENSMUSG00000033444 | 102  | 0.13 | 0.09 | 0.09 | 0.12 | 0.05 | 0.1  |
| chr10 | 116584884 | 116585908 | Frs2          | ENSMUSG00000020170 | 134  | 0.15 | 0.11 | 0.09 | 0.15 | 0.07 | 0.13 |
| chr10 | 42221644  | 42222524  | Snx3          | ENSMUSG00000019804 | 248  | 0.56 | 0.18 | 0.13 | 0.22 | 0.29 | 0.15 |
| chr10 | 79937969  | 79938445  | U6            | ENSMUSG00000089228 | -890 | 0.3  | 0.15 | 0.11 | 0.18 | 0.13 | 0.18 |
| chr10 | 93103567  | 93104272  | Ntn4          | ENSMUSG00000020019 | 125  | 0.17 | 0.15 | 0.1  | 0.11 | 0.08 | 0.14 |
| chr10 | 88194020  | 88194835  | Arl1          | ENSMUSG00000060904 | 316  | 0.16 | 0.15 | 0.13 | 0.17 | 0.07 | 0.17 |
| chr10 | 126478020 | 126479290 | Mettl1        | ENSMUSG00000006732 | 185  | 0.39 | 0.12 | 0.1  | 0.17 | 0.21 | 0.17 |

|       |           |           |               |                    |       |      |      |      |      |      |      |
|-------|-----------|-----------|---------------|--------------------|-------|------|------|------|------|------|------|
| chr10 | 33738962  | 33739750  | Rwdd1         | ENSMUSG00000019782 | 36    | 0.29 | 0.12 | 0.11 | 0.14 | 0.11 | 0.1  |
| chr10 | 70844174  | 70844547  | lpmk          | ENSMUSG00000060733 | -137  | 0.71 | 0.62 | 0.88 | 0.79 | 0.94 | 0.9  |
| chr10 | 74454147  | 74454472  | Gnaz          | ENSMUSG00000040009 | 723   | 0.96 | 0.95 | 0.85 | 0.87 | 0.76 | 0.8  |
| chr10 | 70061365  | 70062904  | Phyhipl       | ENSMUSG00000037747 | -304  | 0.21 | 0.32 | 0.11 | 0.14 | 0.11 | 0.16 |
| chr10 | 79627329  | 79627607  | Cirbp         | ENSMUSG00000045193 | -1262 | 0.68 | 0.35 | 0.14 | 0.34 | 0.31 | 0.24 |
| chr10 | 50614048  | 50615138  | Sim1          | ENSMUSG00000019913 | -864  | 0.15 | 0.09 | 0.12 | 0.12 | 0.07 | 0.16 |
| chr10 | 98724130  | 98726815  | Dusp6         | ENSMUSG00000019960 | -393  | 0.16 | 0.13 | 0.1  | 0.14 | 0.1  | 0.15 |
| chr10 | 60845891  | 60846436  | X99384        | ENSMUSG00000020092 | 108   | 0.45 | 0.23 | 0.16 | 0.17 | 0.19 | 0.16 |
| chr10 | 126338007 | 126338510 | Xrcc6bp1      | ENSMUSG00000025436 | 169   | 0.19 | 0.19 | 0.1  | 0.18 | 0.06 | 0.15 |
| chr10 | 93774629  | 93775220  | Tmcc3         | ENSMUSG00000020023 | 230   | 0.73 | 0.88 | 0.14 | 0.22 | 0.14 | 0.1  |
| chr10 | 122701496 | 122702845 | Fam19a2       | ENSMUSG00000044071 | 1038  | 0.19 | 0.13 | 0.12 | 0.22 | 0.12 | 0.15 |
| chr10 | 74523129  | 74524954  | Bcr           | ENSMUSG00000009681 | 400   | 0.16 | 0.18 | 0.12 | 0.16 | 0.1  | 0.16 |
| chr10 | 80630235  | 80630718  | Pias4         | ENSMUSG00000004934 | -17   | 0.16 | 0.17 | 0.13 | 0.27 | 0.71 | 0.14 |
| chr10 | 126971166 | 126971528 | Nxph4         | ENSMUSG00000040258 | 268   | 0.56 | 0.27 | 0.23 | 0.16 | 0.16 | 0.15 |
| chr10 | 127176681 | 127177096 | Zbtb39        | ENSMUSG00000044617 | 294   | 0.28 | 0.21 | 0.09 | 0.13 | 0.15 | 0.1  |
| chr10 | 62064699  | 62065184  | Ddx21         | ENSMUSG00000020075 | 105   | 0.43 | 0.16 | 0.11 | 0.21 | 0.12 | 0.15 |
| chr10 | 80812821  | 80813441  | Hmg20b        | ENSMUSG00000020232 | -195  | 0.34 | 0.16 | 0.16 | 0.16 | 0.19 | 0.19 |
| chr10 | 19868239  | 19869155  | Mtap7         | ENSMUSG00000019996 | 420   | 0.13 | 0.1  | 0.1  | 0.16 | 0.06 | 0.12 |
| chr10 | 72561876  | 72562951  | Pcdh15        | ENSMUSG00000052613 | 323   | 0.1  | 0.08 | 0.11 | 0.12 | 0.22 | 0.15 |
| chr10 | 120414920 | 120416814 | Lemd3         | ENSMUSG00000048661 | 521   | 0.29 | 0.23 | 0.14 | 0.18 | 0.17 | 0.15 |
| chr10 | 5958412   | 5959826   | Zbtb2         | ENSMUSG00000075327 | 686   | 0.23 | 0.19 | 0.09 | 0.15 | 0.14 | 0.1  |
| chr10 | 94151041  | 94151871  | 4932415G12Rik | ENSMUSG00000086635 | -98   | 0.18 | 0.11 | 0.1  | 0.09 | 0.08 | 0.12 |
| chr10 | 116812876 | 116814232 | Cpsf6         | ENSMUSG00000055531 | 430   | 0.24 | 0.13 | 0.14 | 0.26 | 0.14 | 0.14 |
| chr10 | 75322417  | 75323085  | Mif           | ENSMUSG00000033307 | 244   | 0.62 | 0.39 | 0.18 | 0.17 | 0.4  | 0.27 |
| chr10 | 60149335  | 60150528  | Cdh23         | ENSMUSG00000012819 | 74    | 0.21 | 0.12 | 0.08 | 0.16 | 0.1  | 0.15 |
| chr10 | 45055287  | 45056029  | Bves          | ENSMUSG00000071317 | 90    | 0.19 | 0.12 | 0.08 | 0.16 | 0.08 | 0.1  |
| chr10 | 66558928  | 66560220  | Jmjd1c        | ENSMUSG00000037876 | 421   | 0.13 | 0.18 | 0.09 | 0.16 | 0.06 | 0.14 |
| chr10 | 79502245  | 79502630  | Polr2e        | ENSMUSG00000004667 | -42   | 0.1  | 0.17 | 0.12 | 0.17 | 0.2  | 0.12 |
| chr10 | 89335763  | 89336301  | Anks1b        | ENSMUSG00000058589 | -385  | 0.13 | 0.24 | 0.1  | 0.19 | 0.06 | 0.16 |
| chr10 | 126648274 | 126648814 | Pip4k2c       | ENSMUSG00000025417 | 134   | 0.19 | 0.19 | 0.1  | 0.18 | 0.1  | 0.11 |

|       |           |           |               |                    |       |      |      |      |      |      |      |
|-------|-----------|-----------|---------------|--------------------|-------|------|------|------|------|------|------|
| chr10 | 79282149  | 79282452  | 9130017N09Rik | ENSMUSG00000035852 | -1466 | 0.72 | 0.7  | 0.73 | 0.73 | 0.87 | 0.91 |
| chr10 | 80892774  | 80893984  | Nfic          | ENSMUSG00000055053 | 371   | 0.15 | 0.16 | 0.11 | 0.13 | 0.08 | 0.13 |
| chr10 | 82161727  | 82162569  | Hfcf2         | ENSMUSG00000020246 | 396   | 0.26 | 0.42 | 0.09 | 0.13 | 0.11 | 0.17 |
| chr10 | 121533687 | 121534271 | Tmem5         | ENSMUSG00000034620 | 203   | 0.25 | 0.22 | 0.08 | 0.18 | 0.1  | 0.14 |
| chr10 | 76495224  | 76496222  | Slc19a1       | ENSMUSG00000001436 | 294   | 0.49 | 0.25 | 0.15 | 0.15 | 0.23 | 0.13 |
| chr10 | 17775039  | 17776091  | Reps1         | ENSMUSG00000019854 | -102  | 0.12 | 0.17 | 0.08 | 0.1  | 0.07 | 0.15 |
| chr10 | 92623185  | 92624411  | Cdk17         | ENSMUSG00000020015 | 177   | 0.22 | 0.17 | 0.12 | 0.15 | 0.14 | 0.13 |
| chr10 | 75022594  | 75023100  | Al646023      | ENSMUSG00000046807 | 228   | 0.16 | 0.14 | 0.13 | 0.11 | 0.08 | 0.15 |
| chr10 | 79610920  | 79613780  | Midn          | ENSMUSG00000035621 | 1333  | 0.14 | 0.15 | 0.11 | 0.12 | 0.09 | 0.1  |
| chr10 | 87922239  | 87922736  | Sycp3         | ENSMUSG00000020059 | 173   | 0.88 | 0.87 | 0.91 | 0.93 | 0.79 | 0.85 |
| chr10 | 96079118  | 96080418  | Btg1          | ENSMUSG00000036478 | 133   | 0.33 | 0.22 | 0.13 | 0.16 | 0.17 | 0.16 |
| chr10 | 21868338  | 21871497  | E030030I06Rik | ENSMUSG00000055657 | -1288 | 0.1  | 0.06 | 0.13 | 0.17 | 0.07 | 0.16 |
| chr10 | 80755542  | 80756258  | Pip5k1c       | ENSMUSG00000034902 | 192   | 0.42 | 0.17 | 0.21 | 0.27 | 0.21 | 0.21 |
| chr10 | 126949841 | 126950252 | Ndufa4l2      | ENSMUSG00000040280 | -1949 | 0.12 | 0.14 | 0.14 | 0.26 | 0.37 | 0.13 |
| chr10 | 80288999  | 80289982  | Oaz1          | ENSMUSG00000035242 | 89    | 0.6  | 0.46 | 0.22 | 0.26 | 0.41 | 0.24 |
| chr10 | 22450472  | 22451831  | Tbpl1         | ENSMUSG00000071359 | -57   | 0.17 | 0.16 | 0.09 | 0.11 | 0.07 | 0.15 |
| chr10 | 59078871  | 59079483  | Ccdc109a      | ENSMUSG00000009647 | 226   | 0.38 | 0.41 | 0.15 | 0.16 | 0.22 | 0.25 |
| chr10 | 100051584 | 100051973 | 4930430F08Rik | ENSMUSG00000046567 | 115   | 0.67 | 0.09 | 0.11 | 0.19 | 0.19 | 0.22 |
| chr10 | 77814654  | 77815270  | Agpat3        | ENSMUSG00000001211 | -164  | 0.12 | 0.16 | 0.08 | 0.11 | 0.06 | 0.12 |
| chr10 | 84565165  | 84565983  | Fhl4          | ENSMUSG00000050035 | -334  | 0.22 | 0.22 | 0.13 | 0.16 | 0.14 | 0.14 |
| chr10 | 42198039  | 42198464  | Lace1         | ENSMUSG00000038302 | -165  | 0.22 | 0.15 | 0.1  | 0.14 | 0.08 | 0.17 |
| chr10 | 80783414  | 80784026  | 2510012J08Rik | ENSMUSG00000034889 | -128  | 0.33 | 0.16 | 0.18 | 0.18 | 0.09 | 0.21 |
| chr10 | 118676254 | 118677449 | Cand1         | ENSMUSG00000020114 | -492  | 0.16 | 0.09 | 0.11 | 0.16 | 0.11 | 0.16 |
| chr10 | 57251824  | 57252411  | Serinc1       | ENSMUSG00000019877 | 98    | 0.16 | 0.19 | 0.09 | 0.13 | 0.07 | 0.11 |
| chr10 | 42299394  | 42299697  | Nr2e1         | ENSMUSG00000019803 | 606   | 0.2  | 0.62 | 0.18 | 0.21 | 0.5  | 0.36 |
| chr10 | 75905040  | 75905836  | Pcnt          | ENSMUSG00000001151 | 93    | 0.11 | 0.25 | 0.17 | 0.15 | 0.04 | 0.24 |
| chr10 | 79316817  | 79318094  | Ptbp1         | ENSMUSG00000006498 | 283   | 0.26 | 0.16 | 0.08 | 0.15 | 0.12 | 0.11 |
| chr10 | 118890466 | 118891808 | Grip1         | ENSMUSG00000034813 | 47    | 0.12 | 0.2  | 0.11 | 0.16 | 0.22 | 0.14 |
| chr10 | 127984339 | 127985074 | Zc3h10        | ENSMUSG00000039810 | -11   | 0.27 | 0.31 | 0.13 | 0.12 | 0.11 | 0.26 |
| chr10 | 82226107  | 82227066  | Nfyb          | ENSMUSG00000020248 | -195  | 0.21 | 0.09 | 0.09 | 0.18 | 0.15 | 0.17 |

|       |           |           |               |                    |      |      |      |      |      |      |      |
|-------|-----------|-----------|---------------|--------------------|------|------|------|------|------|------|------|
| chr10 | 86241760  | 86242276  | Nt5dc3        | ENSMUSG00000054027 | 268  | 0.15 | 0.09 | 0.09 | 0.12 | 0.07 | 0.13 |
| chr10 | 80164452  | 80164862  | Mob3a         | ENSMUSG00000003348 | -92  | 0.09 | 0.15 | 0.13 | 0.11 | 0.29 | 0.14 |
| chr10 | 6372598   | 6372361   | Mthfd1l       | ENSMUSG00000040675 | 418  | 0.26 | 0.19 | 0.14 | 0.1  | 0.14 | 0.2  |
| chr10 | 117282858 | 117283447 | Rap1b         | ENSMUSG00000052681 | -161 | 0.16 | 0.09 | 0.07 | 0.07 | 0.06 | 0.12 |
| chr10 | 59740205  | 59740695  | Psap          | ENSMUSG00000004207 | 75   | 1    | 0.4  | 0.16 | 0.19 | 0.33 | 0.22 |
| chr10 | 79144438  | 79145093  | Cdc34         | ENSMUSG00000020307 | -175 | 0.16 | 0.1  | 0.1  | 0.12 | 0.1  | 0.14 |
| chr10 | 126727416 | 126727764 | Gm4189        | ENSMUSG00000092384 | 190  | 1    | 0.23 | 0.11 | 0.57 | 0.4  | 0.23 |
| chr10 | 14264771  | 14265445  | Gpr126        | ENSMUSG00000039116 | -266 | 0.16 | 0.15 | 0.12 | 0.14 | 0.1  | 0.12 |
| chr10 | 39089352  | 39090266  | Fyn           | ENSMUSG00000019843 | 239  | 0.2  | 0.1  | 0.09 | 0.13 | 0.1  | 0.11 |
| chr10 | 128242043 | 128242814 | Dnajc14       | ENSMUSG00000025354 | -262 | 0.12 | 0.14 | 0.13 | 0.18 | 0.27 | 0.18 |
| chr10 | 117578598 | 117579352 | Mdm1          | ENSMUSG00000020212 | 132  | 0.67 | 0.48 | 0.13 | 0.15 | 0.2  | 0.16 |
| chr10 | 75495233  | 75495599  | Zfp280b       | ENSMUSG00000049764 | 59   | 0.32 | 0.24 | 0.19 | 0.36 | 0.2  | 0.29 |
| chr10 | 40068846  | 40069966  | Cdk19         | ENSMUSG00000038481 | 292  | 0.12 | 0.14 | 0.09 | 0.22 | 0.19 | 0.17 |
| chr10 | 70621770  | 70622808  | Bicc1         | ENSMUSG00000014329 | 149  | 0.18 | 0.12 | 0.1  | 0.18 | 0.11 | 0.13 |
| chr10 | 62113347  | 62114460  | Ddx50         | ENSMUSG00000020076 | 63   | 0.24 | 0.2  | 0.1  | 0.14 | 0.14 | 0.2  |
| chr10 | 80645615  | 80645924  | 4930442H23Rik | ENSMUSG00000053603 | 825  | 0.4  | 0.7  | 0.16 | 0.27 | 0.89 | 0.17 |
| chr10 | 86955190  | 86956698  | Ascl1         | ENSMUSG00000020052 | 461  | 0.18 | 0.13 | 0.12 | 0.2  | 0.25 | 0.17 |
| chr10 | 79229207  | 79230511  | Rnf126        | ENSMUSG00000035890 | -193 | 0.15 | 0.21 | 0.07 | 0.12 | 0.08 | 0.15 |
| chr10 | 5913679   | 5914395   | 1700052N19Rik | ENSMUSG00000061759 | -136 | 0.43 | 0.2  | 0.15 | 0.26 | 0.21 | 0.19 |
| chr10 | 126602036 | 126603314 | B4galnt1      | ENSMUSG00000006731 | 428  | 0.16 | 0.18 | 0.08 | 0.14 | 0.11 | 0.14 |
| chr10 | 117066272 | 117067046 | Cpm           | ENSMUSG00000020183 | 103  | 0.09 | 0.11 | 0.14 | 0.11 | 0.31 | 0.21 |
| chr10 | 86371484  | 86371863  | Gm16280       | ENSMUSG00000089881 | 167  | 0.94 | 0.97 | 0.94 | 0.93 | 0.96 | 0.97 |
| chr10 | 127113918 | 127114465 | Tmem194       | ENSMUSG00000040195 | 71   | 0.19 | 0.19 | 0.07 | 0.15 | 0.08 | 0.14 |
| chr10 | 127669126 | 127669491 | Timeless      | ENSMUSG00000039994 | 172  | 0.45 | 0.13 | 0.14 | 0.19 | 0.16 | 0.18 |
| chr10 | 126500684 | 126500895 | Cdk4          | ENSMUSG00000006728 | 117  | 0.84 | 0.57 | 0.2  | NA   | 0.64 | 0.19 |
| chr10 | 121062971 | 121063763 | Xpot          | ENSMUSG00000034667 | 5    | 0.26 | 0.13 | 0.1  | 0.15 | 0.17 | 0.16 |
| chr10 | 74429648  | 74430220  | Gnaz          | ENSMUSG00000040009 | 12   | 0.21 | 0.16 | 0.14 | 0.14 | 0.13 | 0.11 |
| chr10 | 83996512  | 83997073  | Ckap4         | ENSMUSG00000046841 | -159 | 0.23 | 0.23 | 0.1  | 0.16 | 0.14 | 0.17 |
| chr10 | 82321736  | 82322175  | Txnrd1        | ENSMUSG00000020250 | 4    | 0.33 | 0.12 | 0.08 | 0.21 | 0.12 | 0.23 |
| chr10 | 17667032  | 17668086  | Heca          | ENSMUSG00000039879 | 314  | 0.17 | 0.18 | 0.09 | 0.11 | 0.12 | 0.16 |



|       |           |           |               |                    |       |      |      |      |      |      |      |
|-------|-----------|-----------|---------------|--------------------|-------|------|------|------|------|------|------|
| chr10 | 84217584  | 84217821  | Rfx4          | ENSMUSG00000020037 | -1105 | 0.58 | 0.57 | 0.14 | 0.31 | 0.33 | 0.2  |
| chr10 | 114752210 | 114752763 | Rab21         | ENSMUSG00000020132 | 161   | 0.67 | 0.31 | 0.12 | 0.2  | 0.36 | 0.13 |
| chr10 | 106708926 | 106709663 | Lin7a         | ENSMUSG00000019906 | 395   | 0.5  | 0.28 | 0.2  | 0.19 | 0.2  | 0.22 |
| chr10 | 41529676  | 41530361  | Cep5711       | ENSMUSG00000019813 | -342  | 0.24 | 0.19 | 0.11 | 0.15 | 0.32 | 0.15 |
| chr10 | 75807506  | 75808314  | Dip2a         | ENSMUSG00000020231 | 67    | 0.09 | 0.14 | 0.1  | 0.11 | 0.12 | 0.11 |
| chr10 | 121023762 | 121024080 | Tbk1          | ENSMUSG00000020115 | -71   | 0.36 | 0.17 | 0.08 | 0.12 | 0.11 | 0.08 |
| chr10 | 80362880  | 80363749  | Timm13        | ENSMUSG00000020219 | 400   | 0.23 | 0.15 | 0.11 | 0.19 | 0.14 | 0.13 |
| chr10 | 122115685 | 122116534 | Ppm1h         | ENSMUSG00000034613 | 291   | 0.11 | 0.18 | 0.08 | 0.1  | 0.07 | 0.12 |
| chr10 | 83111206  | 83111662  | Appl2         | ENSMUSG00000020263 | -86   | 1    | 0.18 | 0.14 | 0.19 | 0.24 | 0.22 |
| chr10 | 76721651  | 76722590  | Gm10941       | ENSMUSG00000078444 | -152  | 0.13 | 0.17 | 0.1  | 0.16 | 0.08 | 0.09 |
| chr10 | 18734904  | 18735403  | Tnfaip3       | ENSMUSG00000019850 | 29    | 0.32 | 0.31 | 0.11 | 0.16 | 0.09 | 0.13 |
| chr10 | 41170143  | 41170496  | Zbtb24        | ENSMUSG00000019826 | 130   | 0.16 | 0.07 | 0.08 | 0.13 | 0.08 | 0.13 |
| chr10 | 116500350 | 116500952 | Cct2          | ENSMUSG00000034024 | 219   | 0.14 | 0.15 | 0.08 | 0.16 | 0.09 | 0.14 |
| chr10 | 120912559 | 120913850 | Rassf3        | ENSMUSG00000025795 | 102   | 0.19 | 0.14 | 0.14 | 0.16 | 0.14 | 0.19 |
| chr10 | 7512571   | 7512861   | BC013529      | ENSMUSG00000040006 | -118  | 0.08 | 0.35 | 0.07 | 0.17 | 0.19 | 0.17 |
| chr10 | 66589516  | 66590199  | Jmjd1c        | ENSMUSG00000037876 | -149  | 0.17 | 0.21 | 0.09 | 0.09 | 0.12 | 0.14 |
| chr10 | 80204548  | 80204893  | Ap3d1         | ENSMUSG00000020198 | 236   | 0.18 | 0.18 | 0.1  | 0.16 | 0.08 | 0.14 |
| chr10 | 89148480  | 89149178  | Scyl2         | ENSMUSG00000069539 | 179   | 0.19 | 0.24 | 0.1  | 0.12 | 0.13 | 0.16 |
| chr10 | 99949781  | 99950444  | Tmtc3         | ENSMUSG00000036676 | -211  | 0.18 | 0.12 | 0.12 | 0.13 | 0.1  | 0.18 |
| chr10 | 25797953  | 25798735  | Gm9767        | ENSMUSG00000039098 | 283   | 0.16 | 0.12 | 0.11 | 0.15 | 0.1  | 0.12 |
| chr10 | 57351823  | 57352026  | Pkib          | ENSMUSG00000019876 | 67    | 1    | 0.32 | 0.13 | 0.23 | 0.08 | 0.12 |
| chr10 | 79379552  | 79379929  | C030046I01Rik | ENSMUSG00000035781 | -65   | 0.2  | 0.19 | 0.11 | 0.14 | 0.08 | 0.12 |
| chr10 | 79389329  | 79390581  | Arid3a        | ENSMUSG00000019564 | 167   | 0.16 | 0.12 | 0.12 | 0.21 | 0.09 | 0.17 |
| chr10 | 13272754  | 13273256  | Pex3          | ENSMUSG00000019809 | -79   | 0.4  | 0.38 | 0.15 | 0.18 | 0.24 | 0.17 |
| chr10 | 21602055  | 21602375  | Sgk1          | ENSMUSG00000019970 | 40    | 0.5  | 0.5  | 0.19 | 0.24 | 0.14 | 0.31 |
| chr10 | 79202058  | 79202338  | Polrmt        | ENSMUSG00000020329 | -79   | 1    | 0.96 | 0.79 | 0.74 | 0.93 | 0.91 |
| chr10 | 87609363  | 87609942  | 4930547N16Rik | ENSMUSG00000035365 | -29   | 0.35 | 0.15 | 0.1  | 0.28 | 0.1  | 0.09 |
| chr10 | 125403141 | 125403977 | Lrig3         | ENSMUSG00000020105 | 284   | 0.13 | 0.13 | 0.13 | 0.15 | 0.1  | 0.11 |
| chr10 | 3134203   | 3135100   | Cnksr3        | ENSMUSG00000015202 | 347   | 0.21 | 0.13 | 0.08 | 0.11 | 0.11 | 0.18 |
| chr10 | 79565059  | 79565509  | Sbno2         | ENSMUSG00000035673 | 159   | 0.08 | 0.15 | 0.11 | 0.15 | 0.13 | 0.11 |

|       |           |           |               |                    |      |      |      |      |      |      |      |
|-------|-----------|-----------|---------------|--------------------|------|------|------|------|------|------|------|
| chr10 | 82274701  | 82275120  | 170002816Rik  | ENSMUSG00000056821 | 42   | 0.42 | 0.22 | 0.13 | 0.14 | 0.18 | 0.24 |
| chr10 | 45297572  | 45298260  | Hace1         | ENSMUSG00000038822 | 281  | 0.24 | 0.3  | 0.14 | 0.21 | 0.15 | 0.12 |
| chr10 | 60914920  | 60915694  | Eif4ebp2      | ENSMUSG00000020091 | 99   | 0.07 | 0.1  | 0.09 | 0.17 | 0.12 | 0.2  |
| chr10 | 79361920  | 79362169  | Med16         | ENSMUSG00000013833 | 386  | 0.55 | 0.32 | 0.78 | 0.81 | 0.75 | 0.88 |
| chr10 | 79811764  | 79812075  | Adamts15      | ENSMUSG00000043822 | -762 | 0.2  | 0.49 | 0.21 | 0.23 | 0.32 | 0.18 |
| chr10 | 27794324  | 27794907  | Ptprk         | ENSMUSG00000019889 | -11  | 0.08 | 0.28 | 0.1  | 0.1  | 0.16 | 0.15 |
| chr10 | 75931420  | 75931943  | Mcm3ap        | ENSMUSG00000001150 | 9    | 0.2  | 0.25 | 0.21 | 0.24 | 0.33 | 0.2  |
| chr10 | 80961928  | 80962282  | S1pr4         | ENSMUSG00000044199 | 347  | 0.93 | 0.77 | 0.63 | 0.37 | 0.69 | 0.74 |
| chr10 | 128360160 | 128360602 | Bloc1s1       | ENSMUSG00000090247 | 199  | 0.38 | 0.46 | 0.2  | 0.2  | 0.24 | 0.19 |
| chr10 | 19653419  | 19654916  | Map3k5        | ENSMUSG00000071369 | -111 | 0.12 | 0.21 | 0.09 | 0.13 | 0.1  | 0.14 |
| chr10 | 20067477  | 20067844  | Fam54a        | ENSMUSG00000019992 | 35   | 0.19 | 0.15 | 0.11 | 0.22 | 0.1  | 0.17 |
| chr10 | 23943392  | 23943773  | Moxd1         | ENSMUSG00000020000 | 231  | 1    | 0.36 | 0.14 | 0.2  | 0.3  | 0.1  |
| chr10 | 82092450  | 82093063  | Tdg           | ENSMUSG00000034674 | 183  | 0.27 | 0.2  | 0.08 | 0.1  | 1    | 0.19 |
| chr10 | 121484429 | 121484956 | Srgap1        | ENSMUSG00000020121 | -321 | 0.18 | 0.12 | 0.1  | 0.17 | 0.11 | 0.1  |
| chr10 | 17442834  | 17444022  | Cited2        | ENSMUSG00000039910 | 394  | 0.13 | 0.23 | 0.11 | 0.19 | 0.09 | 0.16 |
| chr10 | 34138020  | 34138340  | Nt5dc1        | ENSMUSG00000039480 | 107  | 1    | 0.12 | 0.09 | 0.11 | 0.1  | 0.16 |
| chr10 | 76628294  | 76628927  | Col18a1       | ENSMUSG0000001435  | 683  | 0.2  | 0.65 | 0.11 | 0.28 | 0.75 | 0.26 |
| chr10 | 79433563  | 79434109  | Grin3b        | ENSMUSG00000035745 | 376  | 0.07 | 0.11 | 0.1  | 0.12 | 0.11 | 0.12 |
| chr10 | 58785774  | 58786670  | P4ha1         | ENSMUSG00000019916 | 178  | 0.13 | 0.14 | 0.1  | 0.15 | 0.09 | 0.12 |
| chr10 | 69707671  | 69708278  | Slc16a9       | ENSMUSG00000037762 | 126  | 0.32 | 0.32 | 0.14 | 0.15 | 0.23 | 0.12 |
| chr10 | 77531858  | 77532585  | Icosl         | ENSMUSG0000000732  | 116  | 0.14 | 0.17 | 0.11 | 0.14 | 0.1  | 0.17 |
| chr10 | 79179006  | 79180785  | Hcn2          | ENSMUSG00000020331 | 516  | 0.12 | 0.22 | 0.1  | 0.12 | 0.09 | 0.14 |
| chr10 | 80958788  | 80959246  | Ncln          | ENSMUSG00000020238 | 54   | 0.75 | 1    | 0.15 | 0.45 | 1    | 0.3  |
| chr10 | 81090155  | 81090392  | Sirt6         | ENSMUSG00000034748 | 38   | 0.15 | 0.16 | 0.09 | 0.23 | 0.1  | 0.08 |
| chr10 | 110446511 | 110447494 | Zdhhc17       | ENSMUSG00000035798 | 57   | 0.13 | 0.12 | 0.09 | 0.16 | 0.17 | 0.12 |
| chr10 | 110601538 | 110602732 | Osbpl8        | ENSMUSG00000020189 | 277  | 0.12 | 0.08 | 0.1  | 0.12 | 0.08 | 0.09 |
| chr10 | 32609661  | 32610161  | Nkain2        | ENSMUSG00000069670 | 357  | 0.38 | 0.25 | 0.12 | 0.63 | 0.16 | 0.37 |
| chr10 | 43176081  | 43176343  | Gm3699        | ENSMUSG00000069648 | 109  | 0.86 | 0.95 | 0.89 | 0.81 | 0.95 | 0.96 |
| chr10 | 115910049 | 115911421 | 4933400F03Rik | ENSMUSG00000085837 | 516  | 0.34 | 0.56 | 0.13 | 0.21 | 0.27 | 0.17 |
| chr10 | 53316619  | 53317663  | Asf1a         | ENSMUSG00000019857 | 374  | 0.14 | 0.17 | 0.12 | 0.17 | 0.1  | 0.12 |

|       |           |           |          |                    |      |      |      |      |      |      |      |
|-------|-----------|-----------|----------|--------------------|------|------|------|------|------|------|------|
| chr10 | 61142764  | 61143487  | Sar1a    | ENSMUSG00000020088 | 67   | 0.46 | 0.21 | 0.11 | 0.11 | 0.36 | 0.16 |
| chr10 | 61158188  | 61159451  | Tysnd1   | ENSMUSG00000020087 | 557  | 0.18 | 0.11 | 0.1  | 0.12 | 0.15 | 0.14 |
| chr10 | 122422280 | 122423664 | Mirlet7i | ENSMUSG00000065406 | -192 | 0.16 | 0.15 | 0.13 | 0.14 | 0.13 | 0.13 |
| chr10 | 59569128  | 59570546  | Spock2   | ENSMUSG00000058297 | 621  | 0.1  | 0.15 | 0.09 | 0.16 | 0.16 | 0.14 |
| chr10 | 74779627  | 74780455  | Adora2a  | ENSMUSG00000020178 | 353  | 0.12 | 0.18 | 0.11 | 0.17 | 0.15 | 0.19 |
| chr10 | 79723481  | 79723842  | Gamt     | ENSMUSG00000020150 | 2    | 0.11 | 0.1  | 0.09 | 0.14 | 0.06 | 0.14 |
| chr10 | 90633446  | 90634848  | Tmpo     | ENSMUSG00000019961 | 180  | 0.14 | 0.13 | 0.12 | 0.14 | 0.11 | 0.15 |
| chr10 | 7382538   | 7383427   | Pcmt1    | ENSMUSG00000019795 | 77   | 0.1  | 0.14 | 0.09 | 0.14 | 0.07 | 0.1  |
| chr10 | 30522464  | 30523259  | Ncoa7    | ENSMUSG00000039697 | 52   | 0.15 | 0.28 | 0.08 | 0.12 | 0.12 | 0.13 |
| chr10 | 51953200  | 51954145  | Dcbld1   | ENSMUSG00000019891 | 247  | 0.17 | 0.12 | 0.17 | 0.2  | 0.12 | 0.18 |
| chr10 | 52410330  | 52411428  | Slc35f1  | ENSMUSG00000038602 | 540  | 0.14 | 0.12 | 0.11 | 0.15 | 0.09 | 0.14 |
| chr10 | 76880515  | 76881279  | Adarb1   | ENSMUSG00000020262 | -298 | 0.1  | 0.39 | 0.07 | 0.12 | 0.21 | 0.1  |
| chr10 | 77706911  | 77707588  | Trappc10 | ENSMUSG00000000374 | 138  | 0.08 | 0.07 | 0.11 | 0.13 | 0.13 | 0.12 |
| chr10 | 84380259  | 84380718  | Ric8b    | ENSMUSG00000035620 | 127  | 0.12 | 0.05 | 0.09 | 0.13 | 0.07 | 0.12 |
| chr10 | 93610544  | 93611133  | Nr2c1    | ENSMUSG00000005897 | 70   | 0.13 | 0.26 | 0.13 | 0.13 | 0.17 | 0.11 |
| chr10 | 80568470  | 80569036  | Map2k2   | ENSMUSG00000035027 | 93   | 0.1  | 0.16 | 0.1  | 0.16 | 0.08 | 0.13 |
| chr10 | 9394415   | 9395345   | Samd5    | ENSMUSG00000060487 | 126  | 0.11 | 0.16 | 0.12 | 0.18 | 0.14 | 0.16 |
| chr10 | 42892964  | 42894905  | Sobp     | ENSMUSG00000038248 | 402  | 0.12 | 0.12 | 0.12 | 0.13 | 0.09 | 0.15 |
| chr10 | 80039609  | 80040809  | Klf16    | ENSMUSG00000035397 | -143 | 0.15 | 0.16 | 0.17 | 0.2  | 0.12 | 0.14 |
| chr10 | 80639201  | 80639800  | Eef2     | ENSMUSG00000034994 | 124  | 0.75 | 1    | 0.12 | 0.16 | 0.47 | 0.22 |
| chr10 | 102490799 | 102491296 | Alx1     | ENSMUSG00000036602 | 364  | 0.62 | 0.76 | 0.18 | 0.4  | 0.4  | 0.33 |
| chr10 | 128328121 | 128328733 | Gdf11    | ENSMUSG00000025352 | 347  | 0.25 | 0.2  | 0.08 | 0.12 | 0.12 | 0.14 |
| chr10 | 74499711  | 74500045  | Rab36    | ENSMUSG00000020175 | 75   | 0.42 | 0.36 | 0.2  | 0.29 | 0.24 | 0.26 |
| chr10 | 21878247  | 21878583  | H60b     | ENSMUSG00000075297 | 23   | 0.09 | 0.08 | 0.11 | 0.14 | 0.06 | 0.13 |
| chr10 | 34001863  | 34002557  | Tspyl1   | ENSMUSG00000047514 | 214  | 0.28 | 0.17 | 0.1  | 0.11 | 0.17 | 0.16 |
| chr10 | 79819135  | 79819780  | Plk5     | ENSMUSG00000035486 | 253  | 0.14 | 0.14 | 0.12 | 0.12 | 0.09 | 0.12 |
| chr10 | 13193551  | 13194328  | Phactr2  | ENSMUSG00000062866 | 263  | 0.13 | 0.12 | 0.1  | 0.12 | 0.1  | 0.15 |
| chr10 | 68675335  | 68676471  | Rhobtb1  | ENSMUSG00000019944 | 521  | 0.22 | 0.31 | 0.15 | 0.19 | 0.13 | 0.18 |
| chr10 | 75700500  | 75700898  | Prmt2    | ENSMUSG00000020230 | -124 | 0.29 | 0.1  | 0.05 | 0.22 | 0.12 | 0.18 |
| chr10 | 85334568  | 85335054  | Pwp1     | ENSMUSG00000001785 | 235  | 0.44 | 0.5  | 0.26 | 0.21 | 0.75 | 0.21 |

|       |           |           |               |                    |       |      |      |      |      |      |      |
|-------|-----------|-----------|---------------|--------------------|-------|------|------|------|------|------|------|
| chr10 | 39744659  | 39745085  | Al317395      | ENSMUSG00000038522 | 93    | 0.06 | 0.24 | 0.1  | 0.15 | 0.14 | 0.1  |
| chr10 | 81050430  | 81050831  | Tle2          | ENSMUSG00000034771 | -84   | 0.82 | 0.8  | 0.73 | 0.77 | 0.74 | 0.82 |
| chr10 | 126748548 | 126749094 | Mars          | ENSMUSG00000040354 | -87   | 0.16 | 0.07 | 0.09 | 0.13 | 0.11 | 0.13 |
| chr10 | 24431511  | 24432235  | Enpp1         | ENSMUSG00000037370 | -76   | 0.23 | 0.19 | 0.16 | 0.3  | 0.1  | 0.21 |
| chr10 | 8237703   | 8238584   | Ust           | ENSMUSG00000047712 | 480   | 0.29 | 0.25 | 0.09 | 0.15 | 0.19 | 0.1  |
| chr10 | 12642521  | 12642931  | B230208H11Rik | ENSMUSG00000085233 | 162   | 0.08 | 0.25 | 0.13 | 0.13 | 0.12 | 0.11 |
| chr10 | 44249234  | 44249615  | Prdm1         | ENSMUSG00000038151 | -1117 | 1    | 0.44 | 0.19 | 0.21 | 0.15 | 0.28 |
| chr10 | 82799899  | 82800722  | Slc41a2       | ENSMUSG00000034591 | -125  | 0.14 | 0.41 | 0.11 | 0.13 | 0.25 | 0.19 |
| chr10 | 126981493 | 126981749 | Lrp1          | ENSMUSG00000040249 | -1357 | 0.88 | 0.79 | 0.91 | 0.9  | 0.93 | 0.93 |
| chr10 | 6079764   | 6080194   | Akap12        | ENSMUSG00000038587 | 182   | 0.14 | 0.42 | 0.13 | 0.25 | 0.3  | 0.17 |
| chr10 | 43987982  | 43988552  | Atg5          | ENSMUSG00000038160 | 103   | 0.2  | 0.11 | 0.08 | 0.13 | 0.16 | 0.16 |
| chr10 | 61245869  | 61247113  | H2afy2        | ENSMUSG00000020086 | 203   | 0.09 | 0.11 | 0.11 | 0.12 | 0.11 | 0.13 |
| chr10 | 82447909  | 82448621  | Chst11        | ENSMUSG00000034612 | 22    | 0.13 | 0.1  | 0.11 | 0.2  | 0.09 | 0.15 |
| chr10 | 128370671 | 128371267 | Itga7         | ENSMUSG00000025348 | 100   | 0.15 | 0.08 | 0.16 | 0.2  | 0.07 | 0.12 |
| chr10 | 7309492   | 7310449   | Lrp11         | ENSMUSG00000019796 | 372   | 0.13 | 0.16 | 0.1  | 0.15 | 0.15 | 0.15 |
| chr10 | 23869096  | 23869544  | Stx7          | ENSMUSG00000019998 | 197   | 0.37 | 0.29 | 0.15 | 0.38 | 0.27 | 0.18 |
| chr10 | 29081375  | 29082056  | Rnf146        | ENSMUSG00000038876 | 114   | 0.14 | 0.17 | 0.11 | 0.16 | 0.11 | 0.12 |
| chr10 | 61949036  | 61950082  | Vps26a        | ENSMUSG00000020078 | -213  | 0.25 | 0.24 | 0.12 | 0.23 | 0.17 | 0.18 |
| chr10 | 75130049  | 75130821  | Cabin1        | ENSMUSG00000020196 | -87   | 0.28 | 0.31 | 0.14 | 0.12 | 0.19 | 0.13 |
| chr10 | 76978304  | 76978840  | 1810008A18Rik | ENSMUSG00000032977 | -255  | 0.26 | 0.51 | 0.12 | 0.28 | 0.19 | 0.2  |
| chr10 | 80598764  | 80600912  | Zbtb7a        | ENSMUSG00000035011 | 822   | 0.17 | 0.24 | 0.11 | 0.15 | 0.14 | 0.13 |
| chr10 | 4423984   | 4424839   | Rgs17         | ENSMUSG00000019775 | 270   | 0.35 | 0.29 | 0.12 | 0.22 | 0.23 | 0.21 |
| chr10 | 77927252  | 77927822  | Pdxk          | ENSMUSG00000032788 | 61    | 0.23 | 0.19 | 0.09 | 0.13 | 0.17 | 0.16 |
| chr10 | 114237495 | 114239257 | Trhde         | ENSMUSG00000050663 | 44    | 0.13 | 0.11 | 0.1  | 0.15 | 0.09 | 0.11 |
| chr10 | 126516659 | 126517431 | Agap2         | ENSMUSG00000025422 | 1082  | 0.18 | 0.18 | 0.13 | 0.19 | 0.22 | 0.17 |
| chr10 | 12810338  | 12811105  | Plagl1        | ENSMUSG00000019817 | 224   | 0.43 | 0.31 | 0.36 | 0.49 | 0.4  | 0.44 |
| chr10 | 43621107  | 43621675  | Qrs1l         | ENSMUSG00000019863 | 160   | 0.24 | 0.4  | 0.14 | 0.32 | 0.17 | 0.17 |
| chr10 | 66998019  | 67000488  | Egr2          | ENSMUSG00000037868 | 1030  | 0.24 | 0.64 | 0.12 | 0.2  | 0.18 | 0.17 |
| chr10 | 95403194  | 95403966  | Eea1          | ENSMUSG00000036499 | 283   | 0.18 | 0.32 | 0.11 | 0.18 | 0.14 | 0.13 |
| chr10 | 127813800 | 127814597 | Ankrd52       | ENSMUSG00000014498 | 27    | 0.15 | 0.19 | 0.08 | 0.12 | 0.12 | 0.11 |

|       |           |           |               |                    |       |      |      |      |      |      |      |
|-------|-----------|-----------|---------------|--------------------|-------|------|------|------|------|------|------|
| chr10 | 127895620 | 127896514 | Smarcc2       | ENSMUSG00000025369 | -225  | 0.14 | 0.09 | 0.1  | 0.17 | 0.18 | 0.16 |
| chr10 | 61802673  | 61803182  | Hk1           | ENSMUSG00000037012 | -2    | 0.1  | 0.14 | 0.09 | 0.16 | 0.06 | 0.23 |
| chr10 | 67739747  | 67740059  | Arid5b        | ENSMUSG00000019947 | 1571  | 0.25 | 0.45 | 0.11 | 0.21 | 0.09 | 0.16 |
| chr10 | 127472334 | 127473366 | Naca          | ENSMUSG00000061315 | 448   | 0.14 | 0.1  | 0.13 | 0.31 | 0.07 | 0.18 |
| chr10 | 21993127  | 21994073  | H60b          | ENSMUSG00000075297 | 448   | 0.17 | 0.15 | 0.13 | 0.14 | 0.09 | 0.16 |
| chr10 | 23069540  | 23070411  | Eya4          | ENSMUSG00000010461 | -274  | 0.17 | 0.17 | 0.15 | 0.2  | 0.27 | 0.13 |
| chr10 | 40020576  | 40022549  | Amd1          | ENSMUSG00000075232 | 430   | 0.15 | 0.12 | 0.15 | 0.17 | 0.19 | 0.18 |
| chr10 | 44178356  | 44178699  | Prdm1         | ENSMUSG00000038151 | -34   | 0.08 | 0.05 | 0.06 | 0.16 | 0.04 | 0.12 |
| chr10 | 79895795  | 79896958  | Tcf3          | ENSMUSG00000020167 | -10   | 0.21 | 0.15 | 0.1  | 0.18 | 0.16 | 0.24 |
| chr10 | 94964350  | 94964607  | Mrpl42        | ENSMUSG00000062981 | 83    | 1    | 0.12 | 0.06 | 0.25 | 0.18 | 0.2  |
| chr10 | 126496340 | 126497516 | 9-Mar         | ENSMUSG00000040502 | 312   | 0.18 | 0.09 | 0.1  | 0.16 | 0.14 | 0.17 |
| chr10 | 127759469 | 127759903 | Cnpy2         | ENSMUSG00000025381 | 171   | 0.36 | NA   | 0.22 | 0.21 | 0.14 | 0.25 |
| chr10 | 80655104  | 80655820  | 2310050B05Rik | ENSMUSG00000085779 | -1892 | 0.13 | 0.18 | 0.06 | 0.18 | 0.08 | 0.12 |
| chr10 | 50312314  | 50312824  | Ascc3         | ENSMUSG00000038774 | 94    | 0.09 | 0.07 | 0.07 | 0.11 | 0.12 | 0.12 |
| chr10 | 80217630  | 80218424  | Dot1l         | ENSMUSG00000061589 | 76    | 0.09 | 0.09 | 0.09 | 0.11 | 0.11 | 0.1  |
| chr10 | 42940854  | 42941840  | Pdss2         | ENSMUSG00000038240 | 55    | 0.12 | 0.1  | 0.1  | 0.19 | 0.09 | 0.1  |
| chr10 | 53470598  | 53471271  | Fam184a       | ENSMUSG00000019856 | -248  | 0.22 | 0.21 | 0.13 | 0.15 | 0.26 | 0.19 |
| chr10 | 57785997  | 57786573  | Lims1         | ENSMUSG00000019920 | 71    | 0.11 | 0.09 | 0.11 | 0.15 | 0.06 | 0.13 |
| chr10 | 67001047  | 67001857  | Egr2          | ENSMUSG00000037868 | 21    | 0.6  | 0.2  | 0.13 | 0.33 | 0.32 | 0.14 |
| chr10 | 79132051  | 79132717  | Gm16517       | ENSMUSG00000020308 | 229   | 0.12 | 0.18 | 0.11 | 0.16 | 0.16 | 0.15 |
| chr10 | 88193352  | 88193895  | Gm4925        | ENSMUSG00000069540 | -162  | 0.21 | 0.19 | 0.13 | 0.13 | 0.14 | 0.19 |
| chr10 | 25016525  | 25017028  | Akap7         | ENSMUSG00000039166 | 103   | 0.19 | 0.22 | 0.09 | 0.16 | 0.23 | 0.2  |
| chr10 | 79209216  | 79209458  | Polrmt        | ENSMUSG00000020329 | -21   | 0.09 | 0.18 | 0.13 | 0.15 | 0.24 | 0.07 |
| chr10 | 126626893 | 126627156 | Arhgef25      | ENSMUSG00000019467 | 86    | 0.18 | 0.25 | 0.12 | 0.21 | 0.14 | 0.19 |
| chr10 | 10277623  | 10277985  | Rab32         | ENSMUSG00000019832 | 227   | 1    | 0.2  | 0.43 | 0.4  | 0.17 | 0.17 |
| chr10 | 57909473  | 57910197  | Ranbp2        | ENSMUSG00000003226 | 235   | 0.1  | 0.3  | 0.08 | 0.12 | 0.07 | 0.15 |
| chr10 | 60609019  | 60609424  | Sgpl1         | ENSMUSG00000020097 | 425   | 0.1  | 0.13 | 0.08 | 0.1  | 0.13 | 0.15 |
| chr10 | 33847265  | 33847533  | Fam26f        | ENSMUSG00000046031 | 379   | 1    | 0.5  | 0.07 | 0.09 | 0.21 | 0.16 |
| chr10 | 61912176  | 61912754  | Supv3l1       | ENSMUSG00000020079 | -34   | 0.16 | 0.15 | 0.1  | 0.15 | 0.22 | 0.17 |
| chr10 | 84849491  | 84851001  | Btbd11        | ENSMUSG00000020042 | 687   | 0.14 | 0.22 | 0.14 | 0.13 | 0.11 | 0.14 |

|       |           |           |               |                     |      |      |      |      |      |      |      |
|-------|-----------|-----------|---------------|---------------------|------|------|------|------|------|------|------|
| chr10 | 38853688  | 38854092  | 1700025K23Rik | ENSMUSG000000051736 | -184 | 0.13 | 0.35 | 0.09 | 0.19 | 0.07 | 0.15 |
| chr10 | 66747512  | 66748245  | Nrbf2         | ENSMUSG000000075000 | 50   | 0.16 | 0.14 | 0.07 | 0.22 | 0.11 | 0.15 |
| chr10 | 79337000  | 79337458  | BC005764      | ENSMUSG000000035835 | -118 | 0.4  | 0.22 | 0.1  | 0.19 | 0.16 | 0.15 |
| chr10 | 121176706 | 121177220 | BC048403      | ENSMUSG000000053684 | -30  | 0.21 | 0.2  | 0.08 | 0.1  | 0.12 | 0.11 |
| chr10 | 19076689  | 19077385  | Olig3         | ENSMUSG000000045591 | 671  | 0.18 | 0.6  | 0.12 | 0.41 | 0.1  | 0.18 |
| chr10 | 57718092  | 57718488  | Gcc2          | ENSMUSG000000038039 | 45   | 0.69 | 0.44 | 0.35 | 0.29 | 0.5  | 0.27 |
| chr10 | 80846933  | 80847393  | Dohh          | ENSMUSG000000078440 | -10  | 0.09 | 0.11 | 0.13 | 0.13 | 0.04 | 0.13 |
| chr10 | 79516056  | 79516957  | Gpx4          | ENSMUSG000000075706 | 273  | 0.07 | 0.11 | 0.11 | 0.1  | 0.09 | 0.09 |
| chr10 | 79727407  | 79728023  | Dazap1        | ENSMUSG000000069565 | -14  | 0.13 | 0.1  | 0.11 | 0.14 | 0.1  | 0.17 |
| chr10 | 120335423 | 120336246 | Msr3          | ENSMUSG000000051236 | 323  | 0.16 | 0.21 | 0.09 | 0.17 | 0.13 | 0.13 |
| chr10 | 128180841 | 128181211 | Dgka          | ENSMUSG000000025357 | 86   | 0.1  | 0.12 | 0.11 | 0.2  | 0.15 | 0.09 |
| chr10 | 9620194   | 9621130   | Stxbp5        | ENSMUSG000000019790 | -181 | 0.14 | 0.09 | 0.08 | 0.12 | 0.11 | 0.1  |
| chr10 | 44786708  | 44787370  | Prep          | ENSMUSG000000019849 | 27   | 0.09 | 0.08 | 0.09 | 0.14 | 0.06 | 0.09 |
| chr10 | 59465528  | 59466041  | Ascc1         | ENSMUSG000000044475 | 197  | 0.16 | 0.52 | 0.11 | 0.11 | 0.1  | 0.12 |
| chr10 | 31033233  | 31033575  | Hddc2         | ENSMUSG00000000295  | 126  | 0.09 | 0.12 | 0.08 | 0.13 | 0.07 | 0.2  |
| chr10 | 70810292  | 70811292  | lpmk          | ENSMUSG000000060733 | 281  | 0.14 | 0.16 | 0.1  | 0.16 | 0.12 | 0.14 |
| chr10 | 75355971  | 75356336  | Derf3         | ENSMUSG000000009092 | 10   | 0.16 | 0.4  | 0.09 | 0.2  | 0.22 | 0.14 |
| chr10 | 79099933  | 79100840  | Shc2          | ENSMUSG000000020312 | 277  | 0.13 | 0.14 | 0.08 | 0.13 | 0.11 | 0.13 |
| chr10 | 80097054  | 80097298  | Csnk1g2       | ENSMUSG000000003345 | -4   | 0.94 | 1    | 0.91 | NA   | 1    | 0.96 |
| chr10 | 120802022 | 120802704 | Gns           | ENSMUSG000000034707 | 217  | 0.33 | 0.22 | 0.2  | 0.15 | 0.24 | 0.17 |
| chr10 | 80084721  | 80085855  | Csnk1g2       | ENSMUSG000000003345 | -237 | 0.36 | 0.43 | 0.08 | 0.28 | 0.28 | 0.19 |
| chr10 | 80826739  | 80827697  | 4930404N11Rik | ENSMUSG000000020234 | 381  | 0.21 | 0.18 | 0.4  | 0.44 | 0.17 | 0.33 |
| chr10 | 19627175  | 19627553  | Pex7          | ENSMUSG000000020003 | -13  | 0.1  | 0.13 | 0.08 | 0.11 | 0.08 | 0.09 |
| chr10 | 40402959  | 40403463  | 9030224M15Rik | ENSMUSG000000045555 | 123  | 0.17 | 0.13 | 0.11 | 0.15 | 0.13 | 0.17 |
| chr10 | 80306393  | 80307048  | Lingo3        | ENSMUSG000000051067 | 64   | 0.17 | 0.08 | 0.13 | 0.15 | 0.11 | 0.15 |
| chr10 | 118305038 | 118306542 | Dyrk2         | ENSMUSG000000028630 | 169  | 0.11 | 0.21 | 0.09 | 0.15 | 0.09 | 0.13 |
| chr10 | 128346937 | 128347405 | Cd63          | ENSMUSG000000025351 | 249  | 0.39 | 0.3  | 0.14 | 0.21 | 0.49 | 0.17 |
| chr10 | 105278138 | 105278922 | BC067068      | ENSMUSG000000036009 | -263 | 0.1  | 0.14 | 0.1  | 0.13 | 0.14 | 0.18 |
| chr10 | 110943193 | 110943953 | Phlda1        | ENSMUSG000000020205 | 231  | 0.09 | 0.09 | 0.1  | 0.13 | 0.07 | 0.11 |
| chr10 | 83006505  | 83007097  | A230046K03Rik | ENSMUSG000000034560 | 115  | 0.13 | 0.21 | 0.12 | 0.15 | 0.1  | 0.12 |

|       |           |           |               |                    |      |      |      |      |      |      |      |
|-------|-----------|-----------|---------------|--------------------|------|------|------|------|------|------|------|
| chr10 | 18564692  | 18565232  | Perp          | ENSMUSG00000019851 | 85   | 0.18 | 0.22 | 0.1  | 0.15 | 0.14 | 0.12 |
| chr10 | 83902968  | 83904200  | Nuak1         | ENSMUSG00000020032 | -242 | 0.15 | 0.15 | 0.11 | 0.15 | 0.13 | 0.12 |
| chr10 | 126817443 | 126817709 | R3hdm2        | ENSMUSG00000025404 | -142 | 0.08 | 0.1  | 0.11 | 0.15 | 0.11 | 0.14 |
| chr10 | 20031752  | 20032959  | 4933406P04Rik | ENSMUSG00000069713 | -255 | 0.3  | 0.24 | 0.14 | 0.15 | 0.25 | 0.15 |
| chr10 | 43260300  | 43260932  | 1700021F05Rik | ENSMUSG00000019797 | 158  | 0.12 | 0.13 | 0.11 | 0.16 | 0.09 | 0.12 |
| chr10 | 53349236  | 53350087  | Mcm9          | ENSMUSG00000058298 | 584  | 0.07 | 0.25 | 0.11 | 0.15 | 0.1  | 0.19 |
| chr10 | 67010788  | 67012000  | Ado           | ENSMUSG00000057134 | 309  | 0.1  | 0.16 | 0.08 | 0.16 | 0.12 | 0.13 |
| chr10 | 79849371  | 79850652  | Mex3d         | ENSMUSG00000048696 | 154  | 0.07 | 0.12 | 0.1  | 0.1  | 0.08 | 0.12 |
| chr10 | 79957530  | 79958927  | Onecut3       | ENSMUSG00000045518 | 648  | 0.17 | 0.11 | 0.09 | 0.15 | 0.15 | 0.13 |
| chr10 | 115550494 | 115551397 | 4933416C03Rik | ENSMUSG00000074734 | 28   | 0.95 | 0.94 | 0.91 | 0.94 | 0.93 | 0.98 |
| chr10 | 120747287 | 120748080 | Tbc1d30       | ENSMUSG00000052302 | 562  | 0.13 | 0.22 | 0.1  | 0.08 | 0.11 | 0.13 |
| chr10 | 77364832  | 77365282  | Lrrc3         | ENSMUSG00000051652 | 224  | 0.19 | 0.29 | 0.12 | 0.42 | 0.26 | 0.27 |
| chr10 | 87819561  | 87820048  | Dram1         | ENSMUSG00000020057 | -63  | 0.33 | 0.08 | 0.08 | 0.16 | 0.08 | 0.07 |
| chr10 | 126699875 | 126700187 | Kif5a         | ENSMUSG00000074657 | 96   | 0.17 | 0.06 | 0.09 | 0.14 | 0.13 | 0.08 |
| chr10 | 93351918  | 93352610  | Metap2        | ENSMUSG00000036112 | 1683 | 0.5  | 0.09 | 0.09 | 0.25 | 0.12 | 0.16 |
| chr10 | 29920045  | 29920437  | Cenpw         | ENSMUSG00000075266 | 105  | 0.09 | 0.19 | 0.2  | 0.15 | 0.14 | 0.14 |
| chr10 | 29033048  | 29033392  | Echdc1        | ENSMUSG00000019883 | 133  | 0.2  | 0.28 | 0.6  | 0.07 | 0.09 | 0.12 |
| chr10 | 59681506  | 59682210  | Chst3         | ENSMUSG00000057337 | 150  | 0.1  | 0.09 | 0.08 | 0.11 | 0.12 | 0.16 |
| chr10 | 98376467  | 98378541  | Atp2b1        | ENSMUSG00000019943 | -282 | 0.1  | 0.2  | 0.1  | 0.15 | 0.11 | 0.13 |
| chr10 | 6979374   | 6980302   | Gm16760       | ENSMUSG00000086086 | 432  | 0.12 | 0.28 | 0.12 | 0.21 | 0.1  | 0.15 |
| chr10 | 59413979  | 59415143  | Ddit4         | ENSMUSG00000020108 | -43  | 0.14 | 0.26 | 0.09 | 0.13 | 0.17 | 0.12 |
| chr10 | 81106036  | 81106680  | Ankrd24       | ENSMUSG00000054708 | -190 | 0.08 | 0.24 | 0.08 | 0.11 | 0.13 | 0.14 |
| chr10 | 39861565  | 39862244  | Slc16a10      | ENSMUSG00000019838 | 156  | 0.43 | 0.44 | 0.16 | 0.68 | 0.25 | 0.16 |
| chr10 | 77632191  | 77632621  | D10Jhu81e     | ENSMUSG00000053329 | 107  | 0.05 | 0.05 | 0.07 | 0.13 | 0.07 | 0.08 |
| chr10 | 60293294  | 60294558  | Unc5b         | ENSMUSG00000020099 | 403  | 0.1  | 0.12 | 0.11 | 0.09 | 0.11 | 0.17 |
| chr10 | 81007282  | 81008120  | Gna11         | ENSMUSG00000034781 | 234  | 0.12 | 0.07 | 0.08 | 0.11 | 0.11 | 0.14 |
| chr10 | 112365784 | 112366152 | Atn7l3b       | ENSMUSG00000074748 | 89   | 0.06 | 0.1  | 0.08 | 0.16 | 0.04 | 0.17 |
| chr10 | 57960611  | 57960936  | Ccdc138       | ENSMUSG00000038010 | 55   | 0.1  | 0.09 | 0.09 | 0.1  | 0.06 | 0.2  |
| chr10 | 119645757 | 119646008 | Tmbim4        | ENSMUSG00000020225 | 76   | 0.14 | 0.09 | 0.09 | 0.16 | 0.09 | 0.14 |
| chr10 | 11000515  | 11001900  | 4930432B10Rik | ENSMUSG00000085480 | -410 | 0.17 | 0.27 | 0.12 | 0.15 | 0.15 | 0.16 |

|       |           |           |               |                     |      |      |      |      |      |      |      |
|-------|-----------|-----------|---------------|---------------------|------|------|------|------|------|------|------|
| chr10 | 62188453  | 62189001  | Stox1         | ENSMUSG00000036923  | -178 | 0.07 | 0.12 | 0.08 | 0.14 | 0.06 | 0.12 |
| chr10 | 79217753  | 79218041  | Fgf22         | ENSMUSG00000020327  | 76   | 0.09 | 0.08 | 0.06 | 0.14 | 0.13 | 0.1  |
| chr10 | 79642039  | 79642421  | Efna2         | ENSMUSG00000003070  | 3    | 0.43 | 0.33 | 0.19 | 0.15 | 0.29 | 0.24 |
| chr10 | 12728107  | 12728926  | Sf3b5         | ENSMUSG000000078348 | 260  | 0.24 | 0.25 | 0.14 | 0.21 | 0.3  | 0.2  |
| chr10 | 14425081  | 14425388  | Vta1          | ENSMUSG000000019868 | 31   | 1    | 1    | 0.2  | 1    | 0.2  | 0.21 |
| chr10 | 61573452  | 61573843  | 2010107G23Rik | ENSMUSG000000020083 | 46   | 0.12 | 0.17 | 0.14 | 0.13 | 0.1  | 0.15 |
| chr10 | 87841817  | 87842500  | Dram1         | ENSMUSG000000020057 | -333 | 0.08 | 0.15 | 0.09 | 0.16 | 0.07 | 0.11 |
| chr10 | 88807368  | 88807880  | Gm17277       | ENSMUSG000000091581 | -117 | 0.11 | 0.14 | 0.1  | 0.15 | 0.09 | 0.12 |
| chr10 | 95025879  | 95026991  | Nudt4         | ENSMUSG000000020029 | 366  | 0.12 | 0.11 | 0.09 | 0.17 | 0.11 | 0.13 |
| chr10 | 39646557  | 39646887  | 2010001E11Rik | ENSMUSG000000039339 | 7    | 0.33 | 0.23 | 0.18 | 0.15 | 0.22 | 0.23 |
| chr10 | 85061390  | 85061613  | Btbd11        | ENSMUSG000000020042 | 345  | 0.1  | 0.11 | 0.08 | 0.14 | 0.15 | 0.07 |
| chr10 | 79076523  | 79076835  | C2cd4c        | ENSMUSG000000045912 | 84   | 0.15 | 0.12 | 0.1  | 0.12 | 0.13 | 0.14 |
| chr10 | 128063211 | 128063610 | Rps26         | ENSMUSG000000025362 | 152  | 0.13 | 0.43 | 0.08 | 0.08 | 0.1  | 0.21 |
| chr10 | 39966535  | 39966995  | Rpf2          | ENSMUSG000000038510 | 20   | 0.28 | 0.25 | 0.07 | 0.2  | 0.23 | 0.18 |
| chr10 | 79630275  | 79631087  | Cirbp         | ENSMUSG000000045193 | 158  | 0.18 | 0.26 | 0.09 | 0.1  | 0.15 | 0.12 |
| chr10 | 93002532  | 93002742  | Amdhd1        | ENSMUSG000000015890 | 141  | 0.5  | 0.17 | 0.11 | 0.29 | 0.33 | 0.16 |
| chr10 | 111708892 | 111709305 | Kcnc2         | ENSMUSG000000035681 | 919  | 0.17 | 0.13 | 0.11 | 0.17 | 0.2  | 0.16 |
| chr10 | 24589656  | 24590194  | Med23         | ENSMUSG000000019984 | 133  | 0.14 | 0.27 | 0.11 | 0.2  | 0.09 | 0.16 |
| chr10 | 62706661  | 62707191  | 1700120B22Rik | ENSMUSG000000045391 | -30  | 0.11 | 0.06 | 0.1  | 0.15 | 0.13 | 0.15 |
| chr10 | 69559417  | 69560760  | Ccdc6         | ENSMUSG000000048701 | 219  | 0.1  | 0.12 | 0.1  | 0.16 | 0.11 | 0.14 |
| chr10 | 77888378  | 77888712  | Cstb          | ENSMUSG000000005054 | 130  | 0.34 | 0.2  | 0.12 | 0.18 | 0.29 | 0.18 |
| chr10 | 90545045  | 90546125  | Apaf1         | ENSMUSG000000019979 | -411 | 0.08 | 0.16 | 0.09 | 0.16 | 0.06 | 0.13 |
| chr10 | 117146930 | 117147988 | Mdm2          | ENSMUSG000000020184 | -381 | 0.16 | 0.18 | 0.11 | 0.14 | 0.19 | 0.15 |
| chr10 | 127846804 | 127847008 | Obfc2b        | ENSMUSG000000025374 | 24   | 0.09 | 0.1  | 0.08 | 0.07 | 0.18 | 0.08 |
| chr10 | 40603150  | 40604332  | Wasf1         | ENSMUSG000000019831 | 460  | 0.12 | 0.11 | 0.09 | 0.17 | 0.13 | 0.13 |
| chr10 | 41209851  | 41210609  | Smpd2         | ENSMUSG000000019822 | -327 | 0.2  | 0.45 | 0.18 | 0.24 | 0.24 | 0.23 |
| chr10 | 82822753  | 82823565  | D10Wsu102e    | ENSMUSG000000020255 | 193  | 0.14 | 0.14 | 0.1  | 0.14 | 0.12 | 0.13 |
| chr10 | 115024454 | 115024965 | Lgr5          | ENSMUSG000000020140 | -160 | 0.16 | 0.21 | 0.14 | 0.19 | 0.14 | 0.17 |
| chr10 | 79601514  | 79602290  | Dos           | ENSMUSG000000035640 | 21   | 0.11 | 0.29 | 0.09 | 0.14 | 0.09 | 0.1  |
| chr10 | 90586172  | 90586938  | Slc25a3       | ENSMUSG000000061904 | 145  | 0.14 | 0.26 | 0.13 | 0.26 | 0.2  | 0.14 |



|       |           |           |           |                     |      |      |      |      |      |      |      |
|-------|-----------|-----------|-----------|---------------------|------|------|------|------|------|------|------|
| chr10 | 23506763  | 23507273  | Rps12     | ENSMUSG00000061983  | -3   | 0.13 | 0.42 | 0.08 | 0.13 | 0.2  | 0.14 |
| chr10 | 70747480  | 70748341  | Ube2d1    | ENSMUSG00000019927  | 56   | 0.12 | 0.27 | 0.11 | 0.15 | 0.13 | 0.14 |
| chr10 | 70807237  | 70807854  | Cisd1     | ENSMUSG00000037710  | 157  | 0.19 | 0.13 | 0.09 | 0.12 | 0.16 | 0.16 |
| chr10 | 107769199 | 107770364 | Pawr      | ENSMUSG00000035873  | 536  | 0.14 | 0.09 | 0.11 | 0.13 | 0.13 | 0.11 |
| chr10 | 89207693  | 89208554  | Uhrf1bp11 | ENSMUSG00000019951  | 387  | 0.23 | 0.33 | 0.1  | 0.17 | 0.25 | 0.17 |
| chr10 | 79861470  | 79862811  | Mbd3      | ENSMUSG00000035478  | 27   | 0.11 | 0.11 | 0.07 | 0.08 | 0.12 | 0.11 |
| chr10 | 36226681  | 36227483  | Hs3st5    | ENSMUSG00000044499  | 387  | 0.16 | 0.11 | 0.18 | 0.15 | 0.13 | 0.15 |
| chr10 | 116386794 | 116387655 | Rab3ip    | ENSMUSG00000064181  | 212  | 0.11 | 0.18 | 0.15 | 0.13 | 0.12 | 0.14 |
| chr10 | 60735875  | 60736403  | Adamts14  | ENSMUSG00000059901  | -149 | 0.14 | 0.19 | 0.12 | 0.13 | 0.13 | 0.15 |
| chr10 | 77472061  | 77472709  | Pfk1      | ENSMUSG00000020277  | 167  | 0.12 | 0.1  | 0.09 | 0.14 | 0.09 | 0.12 |
| chr10 | 88348562  | 88349300  | Slc5a8    | ENSMUSG00000020062  | 194  | 0.08 | 0.3  | 0.21 | 0.22 | 0.12 | 0.31 |
| chr10 | 111409686 | 111410324 | Krr1      | ENSMUSG00000063334  | 285  | 0.16 | 0.09 | 0.11 | 0.19 | 0.13 | 0.19 |
| chr10 | 43298145  | 43299404  | Cd24a     | ENSMUSG00000047139  | -201 | 0.1  | 0.14 | 0.13 | 0.17 | 0.1  | 0.16 |
| chr10 | 51742206  | 51742800  | Vgll2     | ENSMUSG00000049641  | 195  | 0.22 | 0.14 | 0.11 | 0.19 | 0.18 | 0.16 |
| chr10 | 82322964  | 82323436  | Txnrd1    | ENSMUSG00000020250  | 114  | 0.2  | 0.09 | 0.13 | 0.15 | 0.08 | 0.1  |
| chr10 | 29255297  | 29255656  | Rspo3     | ENSMUSG00000019880  | 197  | 0.17 | 0.22 | 0.13 | 0.23 | 0.12 | 0.22 |
| chr10 | 79166983  | 79167419  | Bsg       | ENSMUSG00000023175  | 98   | 0.05 | 0.08 | 0.07 | 0.22 | 0.1  | 0.1  |
| chr10 | 79371462  | 79371665  | Med16     | ENSMUSG00000013833  | 0    | 0.07 | 0.31 | 0.07 | 0.23 | 0.12 | 0.07 |
| chr10 | 77647731  | 77648039  | Pwp2      | ENSMUSG00000032834  | 9    | 0.15 | 0.11 | 0.13 | 0.21 | 0.17 | 0.2  |
| chr10 | 92772857  | 92773308  | Eik3      | ENSMUSG00000008398  | 474  | 0.11 | 0.13 | 0.12 | 0.17 | 0.1  | 0.18 |
| chr10 | 41238663  | 41239776  | Cd164     | ENSMUSG00000019818  | -87  | 0.22 | 0.23 | 0.17 | 0.19 | 0.2  | 0.17 |
| chr10 | 61057878  | 61058143  | Npffr1    | ENSMUSG00000020090  | -222 | 0.11 | 0.1  | 0.09 | 0.16 | 0.09 | 0.18 |
| chr10 | 75383884  | 75384688  | Smarcb1   | ENSMUSG00000000902  | 35   | 0.32 | NA   | 0.09 | 0.18 | 0.38 | 0.1  |
| chr10 | 110910024 | 110910882 | Nap111    | ENSMUSG000000058799 | 205  | 0.1  | 0.13 | 0.09 | 0.13 | 0.11 | 0.1  |
| chr10 | 62800923  | 62802173  | Sirt1     | ENSMUSG00000020063  | 232  | 0.16 | 0.17 | 0.13 | 0.12 | 0.17 | 0.14 |
| chr10 | 85391170  | 85391663  | Ascl4     | ENSMUSG000000085111 | 180  | 0.06 | 0.1  | 0.08 | 0.09 | 0.1  | 0.09 |
| chr10 | 121885654 | 121886377 | Avpr1a    | ENSMUSG00000020123  | 460  | 0.15 | 0.1  | 0.16 | 0.17 | 0.25 | 0.16 |
| chr10 | 80138522  | 80139608  | Mknk2     | ENSMUSG00000020190  | -27  | 0.2  | 0.44 | 0.12 | 0.2  | 0.24 | 0.15 |
| chr10 | 127896707 | 127896916 | Smarcc2   | ENSMUSG00000025369  | 519  | 0.12 | 0.24 | 0.13 | 0.16 | 0.1  | 0.14 |
| chr10 | 8605535   | 8606501   | Sash1     | ENSMUSG00000015305  | -150 | 0.07 | 0.14 | 0.09 | 0.12 | 0.08 | 0.17 |

|       |           |           |               |                    |      |      |      |      |      |      |      |
|-------|-----------|-----------|---------------|--------------------|------|------|------|------|------|------|------|
| chr10 | 19570315  | 19571516  | Slc35d3       | ENSMUSG00000050473 | 350  | 0.11 | 0.24 | 0.12 | 0.14 | 0.12 | 0.1  |
| chr10 | 41737839  | 41738316  | Armc2         | ENSMUSG00000071324 | 109  | 0.18 | 1    | 0.2  | 0.22 | 0.2  | 0.22 |
| chr10 | 68815533  | 68815834  | Cdk1          | ENSMUSG00000019942 | -32  | 0.18 | 0.17 | 0.2  | 0.21 | 0.16 | 0.3  |
| chr10 | 128002339 | 128003508 | Pa2g4         | ENSMUSG00000025364 | -40  | 0.12 | 0.21 | 0.09 | 0.17 | 0.13 | 0.12 |
| chr10 | 77875374  | 77875866  | Rrp1          | ENSMUSG00000061032 | 92   | 0.12 | 0.25 | 0.08 | 0.12 | 0.14 | 0.12 |
| chr10 | 85763009  | 85763582  | Timp3         | ENSMUSG00000020044 | 178  | 0.1  | 0.11 | 0.12 | 0.11 | 0.11 | 0.15 |
| chr10 | 13043675  | 13043919  | Phactr2       | ENSMUSG00000062866 | 169  | 0.24 | 0.14 | 0.17 | 0.15 | 0.29 | 0.13 |
| chr10 | 60881105  | 60881430  | Nodal         | ENSMUSG00000037171 | 547  | 0.22 | 0.17 | 0.15 | 0.04 | 0.14 | 0.27 |
| chr10 | 99478090  | 99479274  | Kitl          | ENSMUSG00000019966 | 418  | 0.1  | 0.19 | 0.1  | 0.15 | 0.09 | 0.14 |
| chr10 | 59342097  | 59342729  | Dnajb12       | ENSMUSG00000020109 | 109  | 0.39 | 0.4  | 0.23 | 0.27 | 0.42 | 0.23 |
| chr10 | 62040656  | 62041323  | 2510003E04Rik | ENSMUSG00000036955 | 153  | 0.12 | 0.13 | 0.09 | 0.14 | 0.11 | 0.1  |
| chr10 | 126632437 | 126632773 | Dtx3          | ENSMUSG00000040415 | 160  | 0.14 | 0.16 | 0.14 | 0.19 | 0.13 | 0.14 |
| chr10 | 79239878  | 79240203  | Fstl3         | ENSMUSG00000020325 | 23   | 0.07 | 0.12 | 0.13 | 0.1  | 0.1  | 0.16 |
| chr10 | 117229350 | 117230110 | Nup107        | ENSMUSG00000052798 | 24   | 0.09 | 0.25 | 0.19 | 0.13 | 0.12 | 0.16 |
| chr10 | 5633618   | 5634270   | Esr1          | ENSMUSG00000019768 | -54  | 0.1  | 0.08 | 0.14 | 0.08 | 0.11 | 0.33 |
| chr10 | 7400706   | 7401658   | Pcmt1         | ENSMUSG00000019795 | -254 | 0.1  | 0.1  | 0.09 | 0.17 | 0.1  | 0.14 |
| chr10 | 7445674   | 7446017   | Katna1        | ENSMUSG00000019794 | 47   | 0.43 | 0.17 | 0.18 | 0.11 | 0.47 | 0.23 |
| chr10 | 17742363  | 17742944  | 3110003A17Rik | ENSMUSG00000078453 | 405  | 0.16 | 0.29 | 0.14 | 0.2  | 0.15 | 0.11 |
| chr10 | 19569788  | 19570051  | Slc35d3       | ENSMUSG00000050473 | 1346 | 0.13 | 0.17 | 0.15 | 0.19 | 0.11 | 0.17 |
| chr10 | 21015720  | 21016453  | Hbs1l         | ENSMUSG00000019977 | 301  | 0.17 | 0.09 | 0.13 | 0.2  | 0.17 | 0.26 |
| chr10 | 22365062  | 22365311  | Slc2a12       | ENSMUSG00000037490 | 369  | 0.33 | 0.25 | 0.13 | 0.11 | 0.19 | 0.07 |
| chr10 | 23516740  | 23517014  | 1110021L09Rik | ENSMUSG00000037455 | 85   | 0.2  | 0.2  | 0.08 | 0.13 | 0.2  | 0.22 |
| chr10 | 30320172  | 30320593  | Trmt11        | ENSMUSG00000019792 | 89   | 0.09 | 0.2  | 0.11 | 0.16 | 0.08 | 0.13 |
| chr10 | 31165380  | 31165805  | Tpd521l       | ENSMUSG00000000296 | 135  | 0.33 | 0.35 | 0.1  | 0.23 | 0.3  | 0.15 |
| chr10 | 33926633  | 33927257  | Dse           | ENSMUSG00000039497 | 412  | 0.1  | 0.15 | 0.1  | 0.17 | 0.09 | 0.11 |
| chr10 | 42301813  | 42304545  | Nr2e1         | ENSMUSG00000019803 | 259  | 0.11 | 0.18 | 0.13 | 0.19 | 0.1  | 0.16 |
| chr10 | 45009107  | 45009602  | Popdc3        | ENSMUSG00000019848 | 243  | 0.1  | 0.08 | 0.16 | 0.14 | 0.09 | 0.19 |
| chr10 | 49502823  | 49503174  | Grik2         | ENSMUSG00000056073 | 67   | 0.07 | NA   | 0.14 | 0.17 | 0.03 | 0.16 |
| chr10 | 52101521  | 52102095  | Gopc          | ENSMUSG00000019861 | 73   | 0.15 | 0.16 | 0.13 | 0.16 | 0.15 | 0.15 |
| chr10 | 52137189  | 52138095  | Nus1          | ENSMUSG00000023068 | 289  | 0.13 | 0.18 | 0.15 | 0.1  | 0.13 | 0.12 |

|       |          |          |               |                    |      |      |      |      |      |      |      |
|-------|----------|----------|---------------|--------------------|------|------|------|------|------|------|------|
| chr10 | 52265423 | 52265724 | Zfa           | ENSMUSG00000049576 | -28  | 0.96 | 0.97 | 0.93 | NA   | 1    | 0.85 |
| chr10 | 55948459 | 55948785 | D630037F22Rik | ENSMUSG00000038122 | -127 | 0.65 | NA   | 0.21 | 0.3  | 0.61 | 0.34 |
| chr10 | 60610095 | 60610715 | Sgpl1         | ENSMUSG00000020097 | -53  | 0.09 | 0.13 | 0.11 | 0.18 | 0.08 | 0.12 |
| chr10 | 61178022 | 61178326 | Aifm2         | ENSMUSG00000020085 | 139  | 0.11 | 0.17 | 0.08 | 0.1  | 0.1  | 0.31 |
| chr10 | 61596372 | 61596636 | Neurog3       | ENSMUSG00000044312 | 666  | 0.13 | 0.25 | 0.09 | 0.31 | 0.13 | 0.16 |
| chr10 | 61693397 | 61694235 | Tspan15       | ENSMUSG00000037031 | 158  | 0.11 | 0.16 | 0.15 | 0.11 | 0.11 | 0.13 |
| chr10 | 62383267 | 62383767 | Slc25a16      | ENSMUSG00000071253 | 136  | 0.06 | 0.2  | 0.09 | 0.26 | 0.06 | 0.21 |
| chr10 | 62409599 | 62409994 | Dna2          | ENSMUSG00000036875 | 22   | 0.27 | 0.25 | 0.12 | 0.3  | 0.27 | 0.11 |
| chr10 | 62563016 | 62563246 | Atoh7         | ENSMUSG00000036816 | 227  | 0.2  | 0.09 | 0.15 | 0.12 | 0.12 | 0.12 |
| chr10 | 62892307 | 62892915 | Ctnna3        | ENSMUSG00000060843 | -235 | 0.4  | 0.83 | 0.1  | 0.21 | 0.31 | 0.22 |
| chr10 | 67374924 | 67375310 | Zfp365        | ENSMUSG00000037855 | 66   | 0.09 | 0.09 | 0.12 | 0.13 | 0.09 | 0.14 |
| chr10 | 67442190 | 67442854 | Rtkn2         | ENSMUSG00000037846 | 204  | 0.07 | 0.14 | 0.1  | 0.22 | 0.08 | 0.12 |
| chr10 | 74980772 | 74981091 | Snrpd3        | ENSMUSG00000020180 | 144  | 0.08 | 0.08 | 0.04 | 0.17 | 0.06 | 0.18 |
| chr10 | 75226822 | 75227261 | Cabin1        | ENSMUSG00000020196 | -11  | 0.15 | 0.44 | 0.15 | 0.12 | 0.15 | 0.14 |
| chr10 | 75398568 | 75399098 | Chchd10       | ENSMUSG00000049422 | 515  | 0.1  | 0.1  | 0.1  | 0.09 | 0.15 | 0.12 |
| chr10 | 76086025 | 76086241 | Col6a2        | ENSMUSG00000020241 | -63  | 0.15 | 0.28 | 0.15 | 0.3  | 0.15 | 0.12 |
| chr10 | 76424375 | 76424877 | Pcbp3         | ENSMUSG0000001120  | -93  | 0.21 | 0.45 | 0.1  | 0.2  | 0.2  | 0.2  |
| chr10 | 77441017 | 77441571 | 1810043G02Rik | ENSMUSG00000020284 | 25   | 0.08 | 0.09 | 0.11 | 0.22 | 0.09 | 0.21 |
| chr10 | 78037446 | 78037784 | Iivbl         | ENSMUSG00000032763 | -177 | 1    | NA   | 0.8  | NA   | 1    | 1    |
| chr10 | 78243093 | 78243420 | Slc1a6        | ENSMUSG00000005357 | 15   | 0.22 | 0.55 | 0.11 | 0.13 | 0.23 | 0.2  |
| chr10 | 79017199 | 79018000 | Mier2         | ENSMUSG00000042570 | -249 | 0.09 | 0.11 | 0.11 | 0.16 | 0.09 | 0.2  |
| chr10 | 79605040 | 79605356 | Atp5d         | ENSMUSG00000003072 | 138  | 0.1  | 0.14 | 0.06 | 0.08 | 0.08 | 0.11 |
| chr10 | 79689081 | 79689677 | Mum1          | ENSMUSG00000020156 | 200  | 0.04 | 0.1  | 0.1  | 0.36 | 0.08 | 0.08 |
| chr10 | 79811125 | 79811456 | Adamts15      | ENSMUSG00000043822 | -133 | 0.13 | 0.14 | 0.11 | 0.1  | 0.12 | 0.18 |
| chr10 | 79858041 | 79858366 | Mbd3          | ENSMUSG00000035478 | -132 | 1    | 1    | 0.84 | 0.96 | 0.98 | 0.92 |
| chr10 | 79869458 | 79869659 | Uqcr11        | ENSMUSG00000020163 | -47  | 0.16 | 0.13 | 0.14 | 0.27 | 0.09 | 0.14 |
| chr10 | 80317711 | 80318488 | Lsm7          | ENSMUSG00000035215 | -145 | 0.12 | 0.15 | 0.09 | 0.13 | 0.1  | 0.16 |
| chr10 | 80380618 | 80381048 | Lmnb2         | ENSMUSG00000062075 | 157  | 0.1  | 0.07 | 0.07 | 0.14 | 0.07 | 0.17 |
| chr10 | 80391424 | 80393406 | Gadd45b       | ENSMUSG00000015312 | -421 | 0.14 | 0.26 | 0.12 | 0.22 | 0.15 | 0.13 |
| chr10 | 80695768 | 80696047 | Zfr2          | ENSMUSG00000034949 | 7    | 0.12 | 0.06 | 0.09 | 0.14 | 0.11 | 0.12 |

|       |           |           |               |                    |      |      |      |      |      |      |      |
|-------|-----------|-----------|---------------|--------------------|------|------|------|------|------|------|------|
| chr10 | 80820120  | 80820699  | Mfsd12        | ENSMUSG00000034854 | 173  | 0.07 | 0.1  | 0.08 | 0.13 | 0.07 | 0.11 |
| chr10 | 80840892  | 80841801  | Fzr1          | ENSMUSG00000020235 | -221 | 0.18 | 0.43 | 0.11 | 0.11 | 0.14 | 0.13 |
| chr10 | 80945103  | 80945541  | Cellf5        | ENSMUSG00000034818 | 95   | 0.07 | 0.04 | 0.09 | 0.09 | 0.06 | 0.1  |
| chr10 | 81037917  | 81038142  | Tle2          | ENSMUSG00000034771 | 24   | 0.06 | 0.09 | 0.06 | 0.16 | 0.04 | 0.11 |
| chr10 | 81111778  | 81112132  | Gm10778       | ENSMUSG00000074860 | 139  | 0.17 | 0.33 | 0.14 | 0.12 | 0.12 | 0.12 |
| chr10 | 83185419  | 83185974  | 150009L16Rik  | ENSMUSG00000087651 | 86   | 0.25 | 0.08 | 0.22 | 0.2  | 0.27 | 0.13 |
| chr10 | 84039018  | 84040205  | Tcp11l2       | ENSMUSG00000020034 | 240  | 0.09 | 0.08 | 0.12 | 0.14 | 0.08 | 0.2  |
| chr10 | 84084975  | 84085421  | Poir3b        | ENSMUSG00000034453 | 16   | 0.15 | 0.21 | 0.08 | 0.26 | 0.16 | 0.19 |
| chr10 | 86167606  | 86168711  | AC152453.1    | ENSMUSG00000092686 | 35   | 0.11 | 0.28 | 0.1  | 0.15 | 0.12 | 0.14 |
| chr10 | 88289226  | 88289637  | Utp20         | ENSMUSG0000004356  | 128  | 0.17 | 0.05 | 0.14 | 0.13 | 0.14 | 0.23 |
| chr10 | 92184814  | 92185217  | Nedd1         | ENSMUSG00000019988 | 150  | 0.12 | 0.07 | 0.12 | 0.17 | 0.09 | 0.12 |
| chr10 | 92916115  | 92916633  | Lta4h         | ENSMUSG00000015889 | 233  | 0.14 | 0.14 | 0.17 | 0.1  | 0.22 | 0.21 |
| chr10 | 93661643  | 93661863  | Ndufa12       | ENSMUSG00000020022 | 53   | 0.11 | 0.08 | 0.11 | 0.2  | 0.14 | 0.09 |
| chr10 | 94877020  | 94879729  | Socs2         | ENSMUSG00000020027 | -913 | 0.15 | 0.16 | 0.12 | 0.16 | 0.16 | 0.14 |
| chr10 | 110356808 | 110357339 | Csrp2         | ENSMUSG00000020186 | -159 | 0.12 | 0.19 | 0.1  | 0.23 | 0.11 | 0.15 |
| chr10 | 114688114 | 114688741 | Tbc1d15       | ENSMUSG00000020130 | 122  | 0.21 | 0.42 | 0.07 | 0.18 | 0.2  | 0.13 |
| chr10 | 114799120 | 114799649 | Tmem19        | ENSMUSG00000069520 | -66  | 0.16 | 0.15 | 0.11 | 0.11 | 0.16 | 0.09 |
| chr10 | 115738432 | 115738635 | Ptprb         | ENSMUSG00000020154 | 103  | 0.15 | 0.05 | 0.15 | 0.11 | 0.17 | 0.19 |
| chr10 | 115855156 | 115855453 | 1700058G18Rik | ENSMUSG00000020164 | 196  | 0.83 | 1    | 0.71 | NA   | 1    | 0.75 |
| chr10 | 119638346 | 119639024 | Irak3         | ENSMUSG00000020227 | -131 | 0.1  | 0.12 | 0.18 | 0.13 | 0.09 | 0.11 |
| chr10 | 120470926 | 120471199 | Wif1          | ENSMUSG00000020218 | 46   | 0.14 | 0.05 | 0.05 | 0.17 | 0.08 | 0.14 |
| chr10 | 121023298 | 121023566 | Tbk1          | ENSMUSG00000020115 | 418  | 0.09 | 0.07 | 0.09 | 0.19 | 0.09 | 0.15 |
| chr10 | 126467632 | 126467945 | Tsfm          | ENSMUSG00000040521 | 27   | 0.14 | 0.14 | 0.12 | 0.12 | 0.13 | 0.16 |
| chr10 | 126625568 | 126625913 | Arhgef25      | ENSMUSG00000019467 | 1139 | 0.15 | 0.15 | 0.12 | 0.16 | 0.18 | 0.16 |
| chr10 | 126703294 | 126703932 | Dctn2         | ENSMUSG00000025410 | 171  | 0.12 | 0.17 | 0.09 | 0.14 | 0.11 | 0.11 |
| chr10 | 126725748 | 126726230 | Mbd6          | ENSMUSG00000025409 | -80  | 1    | 1    | 0.13 | 0.17 | 0.67 | 0.21 |
| chr10 | 126972066 | 126972275 | Nxph4         | ENSMUSG00000040258 | -555 | 1    | NA   | 0.62 | 1    | 1    | NA   |
| chr10 | 127103546 | 127104241 | Nab2          | ENSMUSG00000025402 | -205 | 0.09 | 0.11 | 0.08 | 0.15 | 0.09 | 0.11 |
| chr10 | 127529914 | 127530528 | Baz2a         | ENSMUSG00000040054 | 1530 | 0.5  | 0.75 | 0.15 | 0.29 | 0.46 | 0.21 |
| chr10 | 127707415 | 127707827 | Stat2         | ENSMUSG00000040033 | -8   | 0.31 | 0.46 | 0.14 | 0.24 | 0.3  | 0.17 |

|       |           |           |               |                     |       |      |      |      |      |      |      |
|-------|-----------|-----------|---------------|---------------------|-------|------|------|------|------|------|------|
| chr10 | 127774658 | 127775151 | Cs            | ENSMUSG00000005683  | 16    | 0.1  | 0.07 | 0.09 | 0.16 | 0.11 | 0.13 |
| chr10 | 127848401 | 127848901 | Obfc2b        | ENSMUSG000000025374 | -103  | 0.05 | 0.08 | 0.09 | 0.09 | 0.06 | 0.18 |
| chr10 | 127986279 | 127986279 | Rpl41         | ENSMUSG000000093674 | 60    | 0.12 | 1    | 0.16 | 0.31 | 0.19 | 0.08 |
| chr10 | 128026651 | 128027625 | Erbp3         | ENSMUSG000000018166 | -430  | 0.2  | 0.11 | 0.13 | 0.17 | 0.21 | 0.18 |
| chr10 | 128141585 | 128142274 | Cdk2          | ENSMUSG000000025358 | 178   | 0.18 | 0.56 | 0.1  | 0.2  | 0.17 | 0.14 |
| chr10 | 128184839 | 128185741 | Wibg          | ENSMUSG000000064030 | 355   | 0.14 | 0.17 | 0.15 | 0.19 | 0.14 | 0.1  |
| chr10 | 4522154   | 4523054   | Mtrf1l        | ENSMUSG000000019774 | -27   | NA   | NA   | 0.14 | 0.21 | 0.18 | 0.27 |
| chr10 | 10408975  | 10409196  | Gm10828       | ENSMUSG000000075319 | -1650 | NA   | 0.33 | 0.18 | 0.23 | 0.3  | 0.44 |
| chr10 | 10869003  | 10869667  | Shprh         | ENSMUSG000000090112 | 110   | NA   | 0.3  | 0.07 | 0.17 | 0.09 | 0.14 |
| chr10 | 19311786  | 19312162  | Ifngr1        | ENSMUSG000000020009 | 137   | NA   | 0.1  | 0.12 | 0.09 | 0.06 | 0.13 |
| chr10 | 21879734  | 21879953  | H60b          | ENSMUSG000000075297 | 1451  | NA   | NA   | NA   | NA   | 0.25 | NA   |
| chr10 | 23068271  | 23068476  | Eya4          | ENSMUSG000000010461 | 1328  | 1    | NA   | 0.13 | 0.12 | NA   | 0.12 |
| chr10 | 24315257  | 24315892  | Ctgf          | ENSMUSG000000019997 | 42    | NA   | 0.33 | 0.16 | 0.39 | 0.5  | 0.2  |
| chr10 | 29418966  | 29419173  | Gm10275       | ENSMUSG000000069682 | 27    | 1    | NA   | NA   | NA   | NA   | NA   |
| chr10 | 30338044  | 30338414  | Hint3         | ENSMUSG000000019791 | -90   | NA   | 0.25 | 0.18 | 0.2  | NA   | 0.22 |
| chr10 | 33344168  | 33344373  | Clvs2         | ENSMUSG000000019785 | 155   | NA   | 0.17 | 0.19 | 0.35 | 0.1  | 0.08 |
| chr10 | 33670729  | 33670958  | Zufsp         | ENSMUSG000000039531 | 175   | NA   | NA   | 0.2  | 0.31 | 0.17 | 0.11 |
| chr10 | 34017324  | 34017626  | Tspyl4        | ENSMUSG000000039485 | 248   | NA   | 1    | 0.45 | 0.28 | 0.69 | 1    |
| chr10 | 39618733  | 39619093  | 4930547M16Rik | ENSMUSG000000075243 | -222  | NA   | 0.35 | 0.26 | 0.31 | 0.5  | 0.31 |
| chr10 | 39977245  | 39977599  | Gtf3c6        | ENSMUSG000000019837 | 49    | 0.08 | 0.08 | 0.12 | 0.16 | NA   | 0.23 |
| chr10 | 40791968  | 40792171  | Gpr6          | ENSMUSG000000046922 | 22    | NA   | NA   | 0.21 | NA   | NA   | 0.33 |
| chr10 | 41607095  | 41607504  | Sesn1         | ENSMUSG000000038332 | 54    | NA   | 0.26 | 0.12 | 0.14 | 0.1  | 0.12 |
| chr10 | 49508289  | 49508673  | Grik2         | ENSMUSG000000056073 | 79    | NA   | 0.17 | 0.08 | 0.17 | 0.11 | 0.2  |
| chr10 | 51397581  | 51397811  | Rfx6          | ENSMUSG000000019900 | 80    | NA   | 0.45 | 0.2  | 0.33 | NA   | 0.31 |
| chr10 | 59165094  | 59165547  | Micu1         | ENSMUSG000000020111 | 95    | NA   | 0.13 | 0.06 | 0.07 | 0.12 | 0.22 |
| chr10 | 59809575  | 59809807  | 4632428N05Rik | ENSMUSG000000020101 | 92    | NA   | NA   | 0.25 | NA   | NA   | 0.25 |
| chr10 | 60148695  | 60149089  | Cdh23         | ENSMUSG000000012819 | 1113  | 1    | NA   | 0.17 | 0.54 | NA   | 0.23 |
| chr10 | 60215335  | 60215693  | Slc29a3       | ENSMUSG000000020100 | 16    | NA   | 0.08 | 0.11 | 0.2  | 0.06 | 0.09 |
| chr10 | 60938356  | 60938985  | Lrrc20        | ENSMUSG000000037151 | 89    | NA   | 0.62 | 0.11 | 0.2  | 0.29 | 0.23 |
| chr10 | 61595526  | 61595795  | Neurog3       | ENSMUSG000000044312 | -178  | NA   | 1    | 0.08 | 0.21 | NA   | 0.12 |

|       |          |          |               |                     |       |      |      |      |      |      |      |
|-------|----------|----------|---------------|---------------------|-------|------|------|------|------|------|------|
| chr10 | 62442925 | 62443558 | Rufy2         | ENSMUSG00000020070  | 270   | NA   | 0.34 | 0.1  | 0.12 | 0.22 | 0.19 |
| chr10 | 72117505 | 72117789 | Zwint         | ENSMUSG00000019923  | 54    | NA   | NA   | 0.33 | 0.2  | 0.2  | 0.11 |
| chr10 | 75994074 | 75994473 | Lss           | ENSMUSG000000033105 | -60   | 1    | 0.12 | 0.13 | 0.1  | NA   | 0.18 |
| chr10 | 77044322 | 77044870 | Pttg1ip       | ENSMUSG00000009291  | 131   | NA   | 0.13 | 0.08 | 0.38 | NA   | 0.07 |
| chr10 | 77506156 | 77506428 | Aire          | ENSMUSG00000000731  | 25    | NA   | 1    | 0.32 | NA   | NA   | 0.25 |
| chr10 | 78036984 | 78037207 | Ilvbl         | ENSMUSG000000032763 | -150  | NA   | NA   | NA   | NA   | 1    | NA   |
| chr10 | 78215134 | 78215696 | Ccdc105       | ENSMUSG000000078442 | 397   | NA   | 1    | 0.07 | 0.29 | 0.19 | 0.25 |
| chr10 | 79075026 | 79075237 | C2cd4c        | ENSMUSG000000045912 | 1632  | 0.11 | 0.13 | 0.12 | 0.13 | NA   | 0.14 |
| chr10 | 79242681 | 79242964 | Fstl3         | ENSMUSG000000020325 | -504  | NA   | NA   | 0.09 | 0.15 | 0.25 | 0.17 |
| chr10 | 79281732 | 79281955 | 9130017N09Rik | ENSMUSG000000035852 | -1923 | NA   | NA   | 1    | NA   | NA   | 1    |
| chr10 | 79344806 | 79345034 | Prtn3         | ENSMUSG000000057729 | 392   | NA   | NA   | 0.21 | NA   | 0.5  | NA   |
| chr10 | 79422613 | 79423302 | Wdr18         | ENSMUSG000000035754 | 60    | NA   | NA   | 0.1  | 0.29 | NA   | 0.11 |
| chr10 | 79441068 | 79441342 | ORF61         | ENSMUSG000000013858 | 313   | NA   | 0.88 | 0.59 | 0.67 | 1    | 1    |
| chr10 | 79579929 | 79580137 | Stk11         | ENSMUSG000000003068 | 934   | 0.5  | 0.5  | 0.15 | 0.33 | NA   | 0.12 |
| chr10 | 79604098 | 79604359 | Atp5d         | ENSMUSG000000003072 | 26    | NA   | NA   | 0.25 | 0.5  | NA   | 0.39 |
| chr10 | 80065550 | 80065943 | Adat3         | ENSMUSG000000035370 | 121   | NA   | NA   | 0.09 | 0.24 | 0.14 | 0.14 |
| chr10 | 80118852 | 80119075 | Btbd2         | ENSMUSG000000003344 | -80   | NA   | NA   | 0.12 | 0.2  | 0.67 | 0.12 |
| chr10 | 80165285 | 80165607 | Izumo4        | ENSMUSG000000055862 | 8     | 0.15 | 0.1  | 0.1  | 0.09 | NA   | 0.15 |
| chr10 | 80477626 | 80477887 | Gng7          | ENSMUSG000000048240 | -98   | NA   | NA   | 0.17 | NA   | 1    | 0.09 |
| chr10 | 80522620 | 80523050 | Sgta          | ENSMUSG000000004937 | 88    | NA   | NA   | 0.15 | 0.25 | NA   | 0.19 |
| chr10 | 80532646 | 80533040 | Thop1         | ENSMUSG000000004929 | 63    | NA   | 0.33 | 0.08 | 0.11 | 0.11 | 0.1  |
| chr10 | 80542656 | 80542969 | Thop1         | ENSMUSG000000004929 | 1199  | NA   | NA   | 0.2  | 0.33 | 0.5  | 0.53 |
| chr10 | 80598052 | 80598305 | Zbtb7a        | ENSMUSG000000035011 | 213   | NA   | 0.06 | 0.16 | 0.1  | 0.06 | 0.11 |
| chr10 | 80782991 | 80783303 | 2510012J08Rik | ENSMUSG000000034889 | -701  | NA   | 0.1  | 0.14 | 0.17 | 0.07 | 0.12 |
| chr10 | 80965555 | 80965845 | Gm16106       | ENSMUSG000000082828 | -1518 | NA   | NA   | 0.23 | 0.3  | NA   | 0.29 |
| chr10 | 81063707 | 81063928 | Tle6          | ENSMUSG000000034758 | 1     | NA   | NA   | 0.29 | NA   | 0.25 | 0.14 |
| chr10 | 81641037 | 81641285 | Gm15608       | ENSMUSG000000087481 | 181   | NA   | 0.09 | 0.13 | 0.17 | 0.17 | 0.13 |
| chr10 | 82085405 | 82085993 | 1190007I07Rik | ENSMUSG000000063320 | -28   | NA   | NA   | 0.11 | 0.12 | 0.11 | 0.22 |
| chr10 | 86148208 | 86148543 | 1810014B01Rik | ENSMUSG000000085814 | 29    | NA   | NA   | NA   | NA   | NA   | 1    |
| chr10 | 86521128 | 86521356 | 1700113H08Rik | ENSMUSG000000047129 | 451   | NA   | NA   | 0.15 | 0.12 | NA   | 0.07 |

|       |           |           |               |                     |      |      |      |      |      |      |      |
|-------|-----------|-----------|---------------|---------------------|------|------|------|------|------|------|------|
| chr10 | 89194777  | 89195207  | Actr6         | ENSMUSG00000019948  | 48   | NA   | 0.09 | 0.09 | 0.23 | 0.19 | 0.18 |
| chr10 | 93051988  | 93052443  | 493340&J17Rik | ENSMUSG000000086419 | 57   | NA   | 1    | 0.1  | 0.12 | NA   | 0.3  |
| chr10 | 94786122  | 94786636  | Cradd         | ENSMUSG000000045867 | -58  | NA   | NA   | 0.1  | 0.33 | NA   | 0.25 |
| chr10 | 96080669  | 96080873  | Btg1          | ENSMUSG000000036478 | 1136 | NA   | 0.16 | 0.06 | 0.15 | NA   | 0.1  |
| chr10 | 110735490 | 110735896 | Bbs10         | ENSMUSG000000035759 | -42  | NA   | 0.2  | 0.12 | 0.13 | 0.25 | 0.19 |
| chr10 | 117183193 | 117183542 | Slc35e3       | ENSMUSG000000060181 | 47   | 0.75 | 1    | 1    | 1    | NA   | 1    |
| chr10 | 119549664 | 119550387 | Helb          | ENSMUSG000000020228 | -104 | NA   | 1    | 0.24 | 0.33 | 0.73 | 0.47 |
| chr10 | 119664054 | 119664630 | Llph          | ENSMUSG000000020224 | 216  | NA   | 0.12 | 0.15 | 0.15 | 0.15 | 0.18 |
| chr10 | 126558089 | 126558339 | Os9           | ENSMUSG000000040462 | 2    | NA   | NA   | NA   | NA   | NA   | 1    |
| chr10 | 126617295 | 126617531 | Slc26a10      | ENSMUSG000000040441 | 225  | 0.5  | 0.12 | 0.1  | 0.15 | NA   | 0.38 |
| chr10 | 127058704 | 127058958 | Lrp1          | ENSMUSG000000040249 | -627 | NA   | NA   | 0.17 | 0.12 | 0.33 | 0.3  |
| chr10 | 127648796 | 127649002 | Spryd4        | ENSMUSG000000051346 | -49  | NA   | 0.21 | NA   | 0.4  | NA   | 0.09 |
| chr10 | 127740189 | 127740511 | Pan2          | ENSMUSG000000005682 | -41  | NA   | NA   | NA   | NA   | NA   | 0.18 |
| chr10 | 127962116 | 127962856 | Esyt1         | ENSMUSG000000025366 | 429  | 0.17 | 0.11 | 0.07 | 0.12 | NA   | 0.19 |
| chr10 | 128258500 | 128259129 | Ormdl2        | ENSMUSG000000025353 | -167 | NA   | NA   | 0.19 | 0.23 | 0.5  | 0.18 |
| chr11 | 11708713  | 11709134  | Figl1         | ENSMUSG000000035455 | 5    | 0.59 | 0.37 | 0.28 | 0.18 | 0.15 | 0.19 |
| chr11 | 75161588  | 75162101  | Rpa1          | ENSMUSG000000000751 | -49  | 0.33 | 0.09 | 0.12 | 0.22 | 0.08 | 0.2  |
| chr11 | 35647780  | 35648143  | Rars          | ENSMUSG000000018848 | 2    | 1    | 0.21 | 0.1  | 0.14 | 0.11 | 0.16 |
| chr11 | 88725249  | 88726149  | Akap1         | ENSMUSG000000018428 | 201  | 0.08 | 0.07 | 0.1  | 0.15 | 0.47 | 0.17 |
| chr11 | 22186519  | 22187127  | Ehbp1         | ENSMUSG000000042302 | -948 | 0.28 | 0.68 | 0.27 | 0.67 | 0.7  | 0.22 |
| chr11 | 75401474  | 75402111  | Pitpna        | ENSMUSG000000017781 | 193  | 0.35 | 0.09 | 0.07 | 0.17 | 0.1  | 0.19 |
| chr11 | 57614987  | 57615936  | Sap30l        | ENSMUSG000000020519 | 322  | 0.25 | 0.07 | 0.11 | 0.12 | 0.08 | 0.12 |
| chr11 | 99793342  | 99793617  | Gm11560       | ENSMUSG000000086688 | 3    | 0.87 | 0.87 | 0.69 | 0.56 | 0.64 | 0.58 |
| chr11 | 104546924 | 104547197 | Gm11639       | ENSMUSG000000040838 | 39   | 0.24 | 0.52 | 0.24 | 0.26 | 0.63 | 0.45 |
| chr11 | 4494215   | 4494955   | Mttr3         | ENSMUSG000000034354 | 233  | 0.29 | 0.16 | 0.14 | 0.25 | 0.07 | 0.14 |
| chr11 | 94071557  | 94073407  | Tob1          | ENSMUSG000000037573 | -286 | 0.11 | 0.17 | 0.09 | 0.16 | 0.3  | 0.12 |
| chr11 | 60350630  | 60352684  | Alkbh5        | ENSMUSG000000042650 | 177  | 0.2  | 0.11 | 0.11 | 0.14 | 0.1  | 0.13 |
| chr11 | 100575177 | 100575592 | Hspb9         | ENSMUSG000000017832 | 148  | 0.63 | 0.65 | 0.52 | 0.63 | 0.36 | 0.57 |
| chr11 | 84642199  | 84642807  | Dhrs11        | ENSMUSG000000034449 | -37  | 0.06 | 0.1  | 0.12 | 0.15 | 0.22 | 0.16 |
| chr11 | 57644909  | 57645236  | Hand1         | ENSMUSG000000037335 | 577  | 0.85 | 0.89 | 0.13 | 0.15 | 0.46 | 0.16 |

|       |           |           |          |                      |      |      |      |      |      |      |      |
|-------|-----------|-----------|----------|----------------------|------|------|------|------|------|------|------|
| chr11 | 5441746   | 5442352   | Ccdc117  | ENSMUSG00000020482   | 141  | 0.18 | 0.28 | 0.11 | 0.13 | 0.27 | 0.18 |
| chr11 | 49063980  | 49064361  | Mgat1    | ENSMUSG00000020346   | 156  | 0.08 | 0.53 | 0.09 | 0.18 | 0.71 | 0.13 |
| chr11 | 37049774  | 37050437  | Odz2     | ENSMUSG00000049336   | -639 | 0.23 | 0.18 | 0.09 | 0.15 | 0.05 | 0.09 |
| chr11 | 96975880  | 96976654  | Tbx21    | ENSMUSG00000001444   | 378  | 0.28 | 0.17 | 0.08 | 0.15 | 0.12 | 0.16 |
| chr11 | 6174194   | 6174453   | Tmed4    | ENSMUSG00000004394   | 545  | 1    | 0.09 | 0.12 | 0.14 | 0.1  | 0.16 |
| chr11 | 76030636  | 76031220  | Gemin4   | ENSMUSG000000049396  | 91   | 0.1  | 0.13 | 0.13 | 0.27 | 1    | 0.21 |
| chr11 | 109511554 | 109512601 | Prkar1a  | ENSMUSG000000020612  | 188  | 0.18 | 0.13 | 0.09 | 0.1  | 0.04 | 0.11 |
| chr11 | 102181200 | 102181551 | Ubf      | ENSMUSG000000020923  | -319 | 0.41 | 0.27 | 0.1  | 0.2  | 0.12 | 0.13 |
| chr11 | 115396768 | 115397920 | Sumo2    | ENSMUSG000000020738  | -213 | 0.09 | 0.13 | 0.09 | 0.18 | 0.23 | 0.14 |
| chr11 | 98670876  | 98671451  | Casc3    | ENSMUSG000000078676  | 41   | 0.24 | 0.1  | 0.1  | 0.17 | 0.07 | 0.13 |
| chr11 | 82684306  | 82684864  | Rffi     | ENSMUSG000000020696  | 127  | 0.53 | 0.13 | 0.1  | 0.13 | 0.09 | 0.17 |
| chr11 | 62461523  | 62462445  | BC046404 | ENSMUSG000000046417  | -442 | 0.2  | 0.11 | 0.08 | 0.1  | 0.11 | 0.09 |
| chr11 | 84326800  | 84327289  | Aatf     | ENSMUSG000000018697  | -41  | 0.26 | 0.14 | 0.06 | 0.12 | 0.11 | 0.14 |
| chr11 | 102308441 | 102309090 | Fam171a2 | ENSMUSG000000034685  | 143  | 0.22 | 0.13 | 0.09 | 0.14 | 0.1  | 0.12 |
| chr11 | 109223834 | 109224862 | Gna13    | ENSMUSG000000020611  | 203  | 0.19 | 0.18 | 0.09 | 0.1  | 0.08 | 0.16 |
| chr11 | 105829124 | 105829666 | Ace      | ENSMUSG000000020681  | 136  | 0.51 | 0.14 | 0.11 | 0.11 | 0.1  | 0.15 |
| chr11 | 74738947  | 74739906  | Srr      | ENSMUSG00000001323   | -266 | 0.44 | 0.11 | 0.11 | 0.13 | 0.11 | 0.14 |
| chr11 | 59102415  | 59104319  | Wnt3a    | ENSMUSG000000009900  | 887  | 0.16 | 0.11 | 0.11 | 0.16 | 0.07 | 0.14 |
| chr11 | 49944771  | 49945223  | Tbc1d9b  | ENSMUSG000000036644  | 99   | 0.24 | 0.23 | 0.09 | 0.11 | 0.07 | 0.17 |
| chr11 | 69373510  | 69373896  | Efnb3    | ENSMUSG000000003934  | 4    | 0.17 | 0.13 | 0.1  | 0.17 | 0.03 | 0.15 |
| chr11 | 93746160  | 93747904  | Utp18    | ENSMUSG000000054079  | 44   | 0.15 | 0.13 | 0.1  | 0.15 | 0.25 | 0.12 |
| chr11 | 60166157  | 60166622  | Tom1l2   | ENSMUSG000000000538  | -16  | 0.88 | 0.21 | 0.12 | 0.21 | 0.2  | 0.26 |
| chr11 | 76211944  | 76212794  | Nxn      | ENSMUSG000000020844  | 201  | 0.29 | 0.15 | 0.11 | 0.18 | 0.13 | 0.16 |
| chr11 | 94981320  | 94983177  | Dlx3     | ENSMUSG000000001510  | 845  | 0.15 | 0.15 | 0.14 | 0.18 | 0.08 | 0.15 |
| chr11 | 115999676 | 116000206 | Mrpl38   | ENSMUSG000000020775  | 148  | 0.06 | 0.07 | 0.09 | 0.14 | 0.14 | 0.13 |
| chr11 | 64975886  | 64976485  | Arhgap44 | ENSMUSG0000000033389 | -116 | 0.23 | 0.15 | 0.08 | 0.12 | 0.07 | 0.1  |
| chr11 | 120458905 | 120460138 | Alyref   | ENSMUSG000000025134  | 24   | 0.07 | 0.1  | 0.14 | 0.14 | 0.14 | 0.11 |
| chr11 | 77991715  | 77992512  | Tlcd1    | ENSMUSG000000019437  | -40  | 1    | 1    | 0.13 | 0.1  | 0.11 | 0.16 |
| chr11 | 100711399 | 100712274 | Stat5b   | ENSMUSG000000020919  | 16   | 0.07 | 0.16 | 0.09 | 0.12 | 0.17 | 0.14 |
| chr11 | 4963955   | 4964261   | Gas2l1   | ENSMUSG000000034201  | 746  | 0.26 | 0.23 | 0.31 | 0.32 | 0.43 | 0.4  |



|       |           |           |               |                     |       |      |      |      |      |      |      |
|-------|-----------|-----------|---------------|---------------------|-------|------|------|------|------|------|------|
| chr11 | 69617127  | 69617930  | Tmem102       | ENSMUSG00000089876  | 1598  | 0.46 | 0.17 | 0.12 | 0.18 | 0.07 | 0.12 |
| chr11 | 101163173 | 101163714 | Becn1         | ENSMUSG00000035086  | 77    | 0.26 | 0.1  | 0.1  | 0.1  | 0.1  | 0.1  |
| chr11 | 87408989  | 87409352  | Mtmr4         | ENSMUSG00000018401  | 16    | 1    | 1    | 0.56 | 0.61 | 0.36 | 1    |
| chr11 | 18918887  | 18919292  | Meis1         | ENSMUSG00000020160  | -164  | 0.61 | 0.12 | 0.08 | 0.28 | 0.16 | 0.16 |
| chr11 | 104987734 | 104988309 | Mettl2        | ENSMUSG00000020691  | 282   | 0.18 | 0.13 | 0.11 | 0.18 | 0.08 | 0.13 |
| chr11 | 3548599   | 3549554   | Tug1          | ENSMUSG00000056579  | -261  | 0.15 | 0.17 | 0.12 | 0.18 | 0.08 | 0.16 |
| chr11 | 74992114  | 74992366  | Ovca2         | ENSMUSG00000038268  | 49    | 0.21 | 0.13 | 0.07 | 0.14 | 0.08 | 0.1  |
| chr11 | 74643401  | 74645915  | Mnt           | ENSMUSG00000000282  | 236   | 0.28 | 0.24 | 0.12 | 0.15 | 0.15 | 0.2  |
| chr11 | 120319171 | 120319589 | 1810049H13Rik | ENSMUSG00000039670  | -130  | 0.31 | 0.12 | 0.09 | 0.17 | 0.13 | 0.14 |
| chr11 | 53380751  | 53381354  | A430108G06Rik | ENSMUSG00000086851  | -245  | 0.04 | 0.15 | 0.12 | 0.18 | 0.18 | 0.17 |
| chr11 | 75546139  | 75547174  | Ywhae         | ENSMUSG00000020849  | 285   | 0.2  | 0.34 | 0.16 | 0.27 | 0.36 | 0.27 |
| chr11 | 97605477  | 97606700  | Pip4k2b       | ENSMUSG00000018547  | -70   | 0.26 | 0.31 | 0.15 | 0.15 | 0.16 | 0.18 |
| chr11 | 95004452  | 95004702  | A730090H04Rik | ENSMUSG00000086552  | -1790 | 0.1  | 0.29 | 0.31 | 0.21 | 1    | 0.17 |
| chr11 | 49838410  | 49839256  | Rnf130        | ENSMUSG00000020376  | -15   | 0.19 | 0.36 | 0.21 | 0.29 | 0.36 | 0.16 |
| chr11 | 51103269  | 51103966  | Col23a1       | ENSMUSG00000063564  | 195   | 0.1  | 0.09 | 0.13 | 0.14 | 0.19 | 0.18 |
| chr11 | 75444188  | 75444735  | Inpp5k        | ENSMUSG00000006127  | -29   | 0.07 | 0.23 | 0.1  | 0.2  | 0.29 | 0.2  |
| chr11 | 94490917  | 94491481  | Lrrc59        | ENSMUSG00000020869  | 118   | 0.08 | 0.3  | 0.12 | 0.17 | 0.25 | 0.18 |
| chr11 | 70817373  | 70818121  | Dhx33         | ENSMUSG00000040620  | 175   | 0.08 | 0.11 | 0.12 | 0.11 | 0.27 | 0.15 |
| chr11 | 97643090  | 97643915  | Rpl23         | ENSMUSG00000071415  | 88    | 0.5  | 0.36 | 0.18 | 0.23 | 0.23 | 0.18 |
| chr11 | 108781504 | 108783484 | Axin2         | ENSMUSG00000000142  | 831   | 0.15 | 0.1  | 0.11 | 0.16 | 0.08 | 0.12 |
| chr11 | 6191323   | 6192278   | Ogdh          | ENSMUSG00000020456  | 164   | 0.26 | 0.24 | 0.09 | 0.14 | 0.14 | 0.12 |
| chr11 | 59319510  | 59320307  | 4933439C10Rik | ENSMUSG000000072893 | 309   | 0.21 | 0.16 | 0.11 | 0.15 | 0.1  | 0.16 |
| chr11 | 51813650  | 51814311  | Ube2b         | ENSMUSG00000020390  | 1     | 0.39 | 0.1  | 0.07 | 0.15 | 0.14 | 0.21 |
| chr11 | 53292105  | 53293561  | Sowaha        | ENSMUSG00000044352  | 201   | 0.15 | 0.1  | 0.12 | 0.12 | 0.08 | 0.12 |
| chr11 | 62270287  | 62271299  | Ncor1         | ENSMUSG00000018501  | 32    | 0.12 | 0.2  | 0.12 | 0.15 | 0.22 | 0.13 |
| chr11 | 70223093  | 70223780  | Peip1         | ENSMUSG00000018921  | 94    | 0.18 | 0.24 | 0.08 | 0.14 | 0.07 | 0.16 |
| chr11 | 118216247 | 118216922 | Timp2         | ENSMUSG00000017466  | 236   | 0.14 | 0.06 | 0.09 | 0.1  | 0.07 | 0.15 |
| chr11 | 119216600 | 119217215 | Sgsh          | ENSMUSG00000005043  | -91   | 0.17 | 0.31 | 0.19 | 0.32 | 0.5  | 0.19 |
| chr11 | 49016885  | 49017340  | Zfp62         | ENSMUSG00000046311  | 125   | 0.4  | 0.27 | 0.11 | 0.13 | 0.23 | 0.14 |
| chr11 | 95374722  | 95376307  | Nxph3         | ENSMUSG00000046719  | 370   | 0.11 | 0.1  | 0.1  | 0.14 | 0.05 | 0.13 |

|       |           |           |               |                     |       |      |      |      |      |      |      |
|-------|-----------|-----------|---------------|---------------------|-------|------|------|------|------|------|------|
| chr11 | 40508232  | 40508459  | Mat2b         | ENSMUSG00000042032  | 144   | 0.33 | 0.14 | 0.12 | 0.18 | 0.07 | 0.1  |
| chr11 | 79775641  | 79776184  | Utp6          | ENSMUSG00000035575  | -43   | 0.14 | 0.17 | 0.13 | 0.23 | 0.8  | 0.11 |
| chr11 | 23533135  | 23533766  | 0610010F05Rik | ENSMUSG00000042208  | 99    | 0.14 | 0.13 | 0.08 | 0.14 | 0.07 | 0.11 |
| chr11 | 76891711  | 76892189  | Ccdc55        | ENSMUSG00000037958  | -13   | 0.06 | 0.13 | 0.11 | 0.14 | 0.21 | 0.11 |
| chr11 | 82200564  | 82203307  | Tmem132e      | ENSMUSG00000020701  | -467  | 0.16 | 0.11 | 0.1  | 0.13 | 0.09 | 0.13 |
| chr11 | 96690689  | 96691785  | Nfe2l1        | ENSMUSG00000038615  | -422  | 0.31 | 0.12 | 0.11 | 0.14 | 0.09 | 0.17 |
| chr11 | 94937390  | 94938467  | Itga3         | ENSMUSG00000001507  | 100   | 0.26 | 0.15 | 0.12 | 0.16 | 0.1  | 0.14 |
| chr11 | 80022569  | 80023056  | Rhot1         | ENSMUSG00000017686  | 226   | 0.16 | 0.33 | 0.13 | 0.23 | 0.35 | 0.13 |
| chr11 | 84952957  | 84953985  | Usp32         | ENSMUSG00000000804  | -40   | 0.2  | 0.17 | 0.1  | 0.2  | 0.09 | 0.18 |
| chr11 | 6099828   | 6100404   | Nudcd3        | ENSMUSG00000053838  | 69    | 0.46 | 0.55 | 0.1  | 0.19 | 0.21 | 0.16 |
| chr11 | 69181964  | 69182741  | Chd3          | ENSMUSG00000018474  | 556   | 0.42 | 0.1  | 0.11 | 0.2  | 0.16 | 0.11 |
| chr11 | 85645591  | 85647098  | 2610027K06Rik | ENSMUSG00000087013  | -633  | 0.11 | 0.23 | 0.12 | 0.24 | 0.19 | 0.16 |
| chr11 | 76759022  | 76759601  | Blmh          | ENSMUSG00000020840  | 80    | 0.35 | 0.14 | 0.11 | 0.24 | 0.11 | 0.17 |
| chr11 | 102742015 | 102742566 | Eftud2        | ENSMUSG00000020929  | -41   | 0.17 | 0.1  | 0.09 | 0.14 | 0.08 | 0.13 |
| chr11 | 117060654 | 117061195 | 9-Sep         | ENSMUSG000000059248 | -51   | 0.19 | 0.17 | 0.13 | 0.19 | 0.09 | 0.11 |
| chr11 | 113927283 | 113928600 | Sdk2          | ENSMUSG00000041592  | -652  | 0.15 | 0.14 | 0.08 | 0.17 | 0.09 | 0.13 |
| chr11 | 116392844 | 116395467 | Sphk1         | ENSMUSG00000061878  | 1097  | 0.08 | 0.11 | 0.1  | 0.16 | 0.15 | 0.15 |
| chr11 | 71564124  | 71565174  | Wscd1         | ENSMUSG00000020811  | 462   | 0.15 | 0.25 | 0.11 | 0.18 | 0.04 | 0.2  |
| chr11 | 53276822  | 53277462  | Gm12212       | ENSMUSG00000085707  | -27   | 0.4  | 0.1  | 0.13 | 0.1  | 0.25 | 0.2  |
| chr11 | 50664508  | 50665173  | Grm6          | ENSMUSG00000000617  | 352   | 0.16 | 0.08 | 0.08 | 0.12 | 0.06 | 0.12 |
| chr11 | 102157235 | 102158705 | Atxn7l3       | ENSMUSG00000059995  | -27   | 0.32 | 0.21 | 0.12 | 0.17 | 0.21 | 0.16 |
| chr11 | 72302347  | 72303711  | Spns2         | ENSMUSG00000040447  | 377   | 0.29 | 0.28 | 0.12 | 0.14 | 0.14 | 0.14 |
| chr11 | 43495372  | 43496200  | Pwwp2a        | ENSMUSG00000044950  | 286   | 0.13 | 0.09 | 0.13 | 0.11 | 0.07 | 0.12 |
| chr11 | 94902410  | 94902821  | Pdk2          | ENSMUSG00000038967  | 53    | 0.17 | 0.13 | 0.11 | 0.14 | 0.07 | 0.19 |
| chr11 | 98724803  | 98725384  | Wipf2         | ENSMUSG00000038013  | 141   | 0.5  | 0.06 | 0.12 | 0.14 | 0.07 | 0.17 |
| chr11 | 32121590  | 32122474  | Rhbdf1        | ENSMUSG00000020282  | 212   | 0.13 | 0.11 | 0.11 | 0.11 | 0.06 | 0.13 |
| chr11 | 112642672 | 112644468 | BC006965      | ENSMUSG00000041674  | -280  | 0.15 | 0.16 | 0.1  | 0.15 | 0.08 | 0.16 |
| chr11 | 76810918  | 76811219  | Slc6a4        | ENSMUSG00000020838  | -1037 | 0.22 | 0.17 | 0.12 | 0.24 | 0.06 | 0.14 |
| chr11 | 118151174 | 118151865 | Usp36         | ENSMUSG00000033909  | -133  | 0.18 | 0.09 | 0.12 | 0.2  | 0.06 | 0.17 |
| chr11 | 115473700 | 115474337 | Mif4gd        | ENSMUSG00000020743  | -201  | 0.16 | 0.13 | 0.11 | 0.16 | 0.08 | 0.09 |

|       |           |           |               |                     |       |      |      |      |      |      |      |
|-------|-----------|-----------|---------------|---------------------|-------|------|------|------|------|------|------|
| chr11 | 96902665  | 96903065  | Lrrc46        | ENSMUSG00000020878  | -144  | 0.11 | 0.89 | 0.22 | 0.24 | 0.48 | 0.3  |
| chr11 | 60835707  | 60836756  | Kcnj12        | ENSMUSG00000042529  | 165   | 0.07 | 0.08 | 0.1  | 0.13 | 0.13 | 0.12 |
| chr11 | 7113337   | 7114113   | Igfbp3        | ENSMUSG00000020427  | 175   | 0.21 | 0.16 | 0.08 | 0.16 | 0.11 | 0.09 |
| chr11 | 97887790  | 97888727  | Rpl19         | ENSMUSG00000017404  | 234   | 0.08 | 0.17 | 0.13 | 0.22 | 0.23 | 0.15 |
| chr11 | 70501156  | 70501679  | Camta2        | ENSMUSG00000040712  | 19    | 0.09 | 0.09 | 0.1  | 0.1  | 0.24 | 0.15 |
| chr11 | 53163834  | 53164797  | Aff4          | ENSMUSG00000049470  | -20   | 0.08 | 0.08 | 0.08 | 0.11 | 0.15 | 0.11 |
| chr11 | 50190401  | 50192099  | Hnrnp1        | ENSMUSG00000007850  | 758   | 0.08 | 0.09 | 0.14 | 0.18 | 0.19 | 0.14 |
| chr11 | 79517585  | 79518104  | Gm11205       | ENSMUSG00000084969  | -288  | 0.33 | 0.12 | 0.11 | 0.22 | 0.13 | 0.15 |
| chr11 | 3813420   | 3813973   | Slc35e4       | ENSMUSG00000048807  | 971   | 0.21 | 0.17 | 0.1  | 0.22 | 0.08 | 0.17 |
| chr11 | 69727332  | 69728066  | Gps2          | ENSMUSG00000023170  | 309   | 0.07 | 0.04 | 0.07 | 0.13 | 0.26 | 0.2  |
| chr11 | 33046776  | 33048198  | Fgf18         | ENSMUSG00000057967  | -692  | 0.18 | 0.09 | 0.15 | 0.16 | 0.11 | 0.17 |
| chr11 | 78310523  | 78310965  | Sarm1         | ENSMUSG00000050132  | 216   | 0.17 | 0.22 | 0.08 | 0.16 | 0.08 | 0.15 |
| chr11 | 102317133 | 102317386 | Itga2b        | ENSMUSG00000034664  | 245   | 0.64 | 0.08 | 0.1  | 0.12 | 0.28 | 0.11 |
| chr11 | 77744388  | 77745140  | Sez6          | ENSMUSG0000000632   | 345   | 0.07 | 0.11 | 0.08 | 0.13 | 0.13 | 0.13 |
| chr11 | 16407846  | 16408366  | Sec61g        | ENSMUSG00000078974  | -34   | 0.08 | 0.19 | 0.14 | 0.14 | 0.24 | 0.18 |
| chr11 | 113510768 | 113511418 | Cog1          | ENSMUSG00000018661  | 245   | 0.08 | 0.09 | 0.08 | 0.14 | 0.13 | 0.14 |
| chr11 | 99091486  | 99092409  | Smarce1       | ENSMUSG00000037935  | -220  | 0.11 | 0.12 | 0.1  | 0.16 | 0.07 | 0.19 |
| chr11 | 101303802 | 101304167 | Rpl27         | ENSMUSG00000063316  | 224   | 0.08 | 0.11 | 0.12 | 0.14 | 0.15 | 0.14 |
| chr11 | 67509040  | 67509255  | Rcvrn         | ENSMUSG00000020907  | 319   | 0.84 | 0.96 | 0.77 | 0.77 | 0.71 | 0.83 |
| chr11 | 90499083  | 90499987  | Stxbp4        | ENSMUSG00000020546  | -159  | 0.22 | 0.2  | 0.16 | 0.15 | 0.13 | 0.13 |
| chr11 | 4645941   | 4646990   | Cabp7         | ENSMUSG00000009075  | 316   | 0.1  | 0.11 | 0.08 | 0.1  | 0.06 | 0.11 |
| chr11 | 104330113 | 104330861 | 1700081L11Rik | ENSMUSG00000018412  | -312  | 0.15 | 0.14 | 0.17 | 0.11 | 0.3  | 0.17 |
| chr11 | 31268610  | 31270299  | Stc2          | ENSMUSG00000020303  | -398  | 0.24 | 0.14 | 0.12 | 0.16 | 0.15 | 0.19 |
| chr11 | 98412250  | 98412706  | Zbp2          | ENSMUSG00000017195  | 67    | 0.22 | 0.04 | 0.04 | 0.11 | 0.06 | 0.07 |
| chr11 | 45768665  | 45769038  | Thg1l         | ENSMUSG00000011254  | -161  | 0.42 | 0.19 | 0.15 | 0.26 | 0.18 | 0.18 |
| chr11 | 69213227  | 69213567  | 1700064E03Rik | ENSMUSG000000085178 | -1618 | 0.4  | 0.51 | 0.45 | 0.57 | 0.29 | 0.53 |
| chr11 | 86940297  | 86941208  | Gm11491       | ENSMUSG00000085310  | -345  | 0.14 | 0.21 | 0.09 | 0.15 | 0.23 | 0.14 |
| chr11 | 90252049  | 90252500  | Hlf           | ENSMUSG00000003949  | -65   | 1    | NA   | 0.13 | 0.5  | 0.18 | 0.11 |
| chr11 | 77797438  | 77797894  | Phf12         | ENSMUSG00000037791  | 1252  | 0.6  | 0.3  | 0.08 | 0.21 | 0.12 | 0.21 |
| chr11 | 96202116  | 96202416  | Hoxb3         | ENSMUSG00000048763  | 7     | 0.17 | 0.5  | 0.35 | 0.51 | 1    | 0.61 |

|       |           |           |               |                    |       |      |      |      |      |      |      |
|-------|-----------|-----------|---------------|--------------------|-------|------|------|------|------|------|------|
| chr11 | 30167515  | 30168545  | Spnb2         | ENSMUSG00000020315 | 139   | 0.15 | 0.13 | 0.1  | 0.16 | 0.09 | 0.15 |
| chr11 | 98188358  | 98190092  | Neurod2       | ENSMUSG00000038255 | 1737  | 0.16 | 0.16 | 0.11 | 0.16 | 0.1  | 0.15 |
| chr11 | 102465815 | 102467812 | Fzd2          | ENSMUSG00000050288 | 1068  | 0.1  | 0.16 | 0.1  | 0.17 | 0.17 | 0.19 |
| chr11 | 53449742  | 53450000  | Il13          | ENSMUSG00000020383 | -1667 | 0.19 | 0.07 | 0.08 | 0.17 | 0.09 | 0.16 |
| chr11 | 102017476 | 102017761 | Tmem101       | ENSMUSG00000020921 | 43    | 0.48 | 0.24 | 0.16 | 0.29 | 0.23 | 0.22 |
| chr11 | 116555552 | 116556243 | St6galnac2    | ENSMUSG00000057286 | 26    | 0.25 | 0.1  | 0.15 | 0.16 | 0.13 | 0.17 |
| chr11 | 5662031   | 5662463   | 2210015D19Rik | ENSMUSG00000083844 | 115   | 0.04 | 0.06 | 0.05 | 0.13 | 0.2  | 0.08 |
| chr11 | 18919694  | 18920075  | Meis1         | ENSMUSG00000020160 | -923  | 0.29 | 0.37 | 0.19 | 0.3  | 0.77 | 0.25 |
| chr11 | 107655161 | 107656016 | Gm11650       | ENSMUSG00000087184 | 408   | 0.1  | 0.09 | 0.07 | 0.11 | 0.18 | 0.14 |
| chr11 | 20991240  | 20991963  | Peli1         | ENSMUSG00000020134 | 307   | 0.08 | 0.31 | 0.09 | 0.16 | 0.14 | 0.11 |
| chr11 | 73012836  | 73013263  | Shpk          | ENSMUSG00000005951 | 87    | 0.3  | 0.33 | 0.13 | 0.16 | 0.17 | 0.13 |
| chr11 | 80593064  | 80593734  | Myo1d         | ENSMUSG00000035441 | 106   | 0.07 | 0.24 | 0.1  | 0.14 | 0.13 | 0.15 |
| chr11 | 23155140  | 23156357  | Xpo1          | ENSMUSG00000020290 | -293  | 0.1  | 0.24 | 0.1  | 0.22 | 0.32 | 0.16 |
| chr11 | 49423234  | 49423831  | Flt4          | ENSMUSG00000020357 | 767   | 0.05 | 0.1  | 0.11 | 0.14 | 0.11 | 0.17 |
| chr11 | 70796141  | 70796618  | C1qbp         | ENSMUSG00000018446 | 149   | 0.2  | 0.25 | 0.12 | 0.27 | 0.32 | 0.15 |
| chr11 | 77302925  | 77303636  | Ankrd13b      | ENSMUSG00000037907 | -112  | 0.1  | 0.18 | 0.11 | 0.13 | 0.19 | 0.08 |
| chr11 | 120521168 | 120522702 | Notum         | ENSMUSG00000042988 | -15   | 0.11 | 0.13 | 0.12 | 0.14 | 0.16 | 0.14 |
| chr11 | 96879959  | 96880514  | Sp6           | ENSMUSG00000038560 | 189   | 0.25 | 0.25 | 0.12 | 0.11 | 0.43 | 0.18 |
| chr11 | 102046217 | 102046656 | Lsm12         | ENSMUSG00000020922 | 107   | 0.16 | 0.22 | 0.12 | 0.17 | 0.07 | 0.11 |
| chr11 | 5964999   | 5966088   | Camk2b        | ENSMUSG00000057897 | -2    | 0.12 | 0.07 | 0.09 | 0.1  | 0.07 | 0.09 |
| chr11 | 22871974  | 22872993  | Comm1         | ENSMUSG00000051355 | 376   | 0.3  | 0.4  | 0.51 | 0.54 | 0.37 | 0.44 |
| chr11 | 120442308 | 120443122 | Arhgdia       | ENSMUSG00000025132 | -21   | 0.11 | 0.08 | 0.08 | 0.12 | 0.17 | 0.1  |
| chr11 | 4846999   | 4848244   | Nefn          | ENSMUSG00000020396 | 446   | 0.07 | 0.12 | 0.11 | 0.17 | 0.12 | 0.18 |
| chr11 | 98821748  | 98822315  | Rara          | ENSMUSG00000037992 | 305   | 0.09 | 0.16 | 0.13 | 0.15 | 0.19 | 0.28 |
| chr11 | 120657343 | 120657862 | Dus1l         | ENSMUSG00000025155 | 89    | 0.26 | 0.08 | 0.08 | 0.15 | 0.07 | 0.14 |
| chr11 | 74709914  | 74711706  | Sgsm2         | ENSMUSG00000038351 | -248  | 0.08 | 0.07 | 0.11 | 0.15 | 0.18 | 0.16 |
| chr11 | 83755429  | 83755876  | Ddx52         | ENSMUSG00000020677 | 88    | 0.41 | 0.21 | 0.11 | 0.24 | 0.22 | 0.13 |
| chr11 | 114712572 | 114713915 | Gprc5c        | ENSMUSG00000051043 | 87    | 0.07 | 0.11 | 0.13 | 0.15 | 0.13 | 0.1  |
| chr11 | 121120980 | 121121846 | Foxk2         | ENSMUSG00000039275 | 109   | 0.11 | 0.08 | 0.09 | 0.11 | 0.15 | 0.1  |
| chr11 | 54251488  | 54252159  | Fnip1         | ENSMUSG00000035992 | 122   | 0.16 | 0.64 | 0.25 | 0.8  | 0.8  | 0.39 |

|       |           |           |               |                    |      |      |      |      |      |      |      |
|-------|-----------|-----------|---------------|--------------------|------|------|------|------|------|------|------|
| chr11 | 95170865  | 95171572  | Myst2         | ENSMUSG00000038909 | -335 | 0.08 | 0.07 | 0.12 | 0.18 | 0.14 | 0.19 |
| chr11 | 103993838 | 103995176 | Crhr1         | ENSMUSG00000018634 | 338  | 0.21 | 0.13 | 0.11 | 0.14 | 0.15 | 0.14 |
| chr11 | 117848105 | 117848672 | Pgs1          | ENSMUSG00000017715 | 189  | 0.16 | 0.18 | 0.1  | 0.14 | 0.11 | 0.17 |
| chr11 | 106473496 | 106474522 | Tex2          | ENSMUSG00000040548 | 235  | 0.12 | 0.12 | 0.1  | 0.16 | 0.07 | 0.14 |
| chr11 | 116142518 | 116142976 | Galr2         | ENSMUSG00000020793 | -53  | 1    | 0.35 | 0.06 | 0.14 | 0.15 | 0.08 |
| chr11 | 48567175  | 48567380  | Gm12183       | ENSMUSG00000082454 | -61  | 0.68 | 0.97 | 0.98 | 1    | 0.88 | 0.95 |
| chr11 | 70333535  | 70334032  | Gltpd2        | ENSMUSG00000046811 | 1085 | 0.21 | 0.36 | 0.27 | 0.21 | 0.36 | 0.27 |
| chr11 | 119464185 | 119465028 | Rptor         | ENSMUSG00000025583 | 387  | 0.17 | 0.17 | 0.14 | 0.21 | 0.29 | 0.19 |
| chr11 | 97176910  | 97177207  | Mrpl45        | ENSMUSG00000018882 | 28   | 0.24 | NA   | 0.14 | 1    | 1    | 0.1  |
| chr11 | 49715084  | 49715762  | Rasgef1c      | ENSMUSG00000020374 | 86   | 0.11 | 0.09 | 0.08 | 0.11 | 0.18 | 0.12 |
| chr11 | 101177134 | 101177546 | Psme3         | ENSMUSG00000078652 | -187 | 0.18 | 0.19 | 0.11 | 0.13 | 0.09 | 0.1  |
| chr11 | 104303282 | 104304387 | 1700081L11Rik | ENSMUSG00000018412 | -229 | 0.1  | 0.16 | 0.09 | 0.15 | 0.22 | 0.17 |
| chr11 | 51817638  | 51817948  | Cdkl3         | ENSMUSG00000020389 | 70   | 0.71 | 0.4  | 0.17 | 0.11 | 0.18 | 0.21 |
| chr11 | 70245936  | 70246393  | Arrb2         | ENSMUSG00000060216 | 27   | 0.07 | 0.24 | 0.1  | 0.19 | 0.14 | 0.1  |
| chr11 | 86297705  | 86298682  | Rnft1         | ENSMUSG00000020521 | 34   | 0.27 | 0.11 | 0.13 | 0.24 | 0.05 | 0.14 |
| chr11 | 75608464  | 75609760  | Gm12339       | ENSMUSG00000087059 | 390  | 0.07 | 0.18 | 0.12 | 0.13 | 0.11 | 0.15 |
| chr11 | 5343963   | 5345418   | Znrf3         | ENSMUSG00000041961 | 160  | 0.15 | 0.11 | 0.09 | 0.12 | 0.09 | 0.12 |
| chr11 | 118884059 | 118884892 | Cbx2          | ENSMUSG00000025577 | 199  | 0.13 | 0.11 | 0.12 | 0.13 | 0.07 | 0.19 |
| chr11 | 3231819   | 3232499   | Pik3ip1       | ENSMUSG00000034614 | 84   | 0.28 | 0.11 | 0.12 | 0.25 | 0.15 | 0.14 |
| chr11 | 32432758  | 32433545  | Stk10         | ENSMUSG00000020272 | -154 | 0.18 | 0.54 | 0.12 | 0.14 | 0.34 | 0.13 |
| chr11 | 55274436  | 55274791  | Atox1         | ENSMUSG00000018585 | 86   | 0.08 | 0.13 | 0.1  | 0.14 | 0.16 | 0.15 |
| chr11 | 118338053 | 118338557 | Engase        | ENSMUSG00000033857 | 162  | 0.33 | 0.19 | 0.12 | 0.2  | 0.15 | 0.13 |
| chr11 | 105805029 | 105805766 | Cyb561        | ENSMUSG00000019590 | 329  | 0.2  | 0.29 | 0.09 | 0.17 | 0.29 | 0.1  |
| chr11 | 103610688 | 103611256 | Wnt9b         | ENSMUSG00000018486 | 163  | 0.27 | 0.11 | 0.14 | 0.14 | 0.15 | 0.16 |
| chr11 | 113544737 | 113546051 | D11Wsu99e     | ENSMUSG00000041629 | -158 | 0.39 | 0.17 | 0.18 | 0.21 | 0.22 | 0.17 |
| chr11 | 68901915  | 68902651  | Vamp2         | ENSMUSG00000020894 | 291  | 0.15 | 0.15 | 0.09 | 0.14 | 0.08 | 0.11 |
| chr11 | 74462743  | 74463515  | 1300001101Rik | ENSMUSG00000020741 | 132  | 0.14 | 0.15 | 0.08 | 0.1  | 0.07 | 0.13 |
| chr11 | 115569220 | 115569573 | Grb2          | ENSMUSG00000059923 | 489  | 0.06 | 0.21 | 0.14 | 0.13 | 0.15 | 0.21 |
| chr11 | 78325368  | 78325984  | Tmem199       | ENSMUSG00000051232 | -129 | 0.09 | 0.08 | 0.09 | 0.12 | 0.17 | 0.14 |
| chr11 | 109582634 | 109583047 | Fam20a        | ENSMUSG00000020614 | 730  | 0.24 | 0.12 | 0.18 | 0.36 | 0.09 | 0.25 |

|       |           |           |               |                     |       |      |      |      |      |      |      |
|-------|-----------|-----------|---------------|---------------------|-------|------|------|------|------|------|------|
| chr11 | 45665203  | 45666046  | Clint1        | ENSMUSG00000006169  | 117   | 0.13 | 0.15 | 0.08 | 0.19 | 0.09 | 0.1  |
| chr11 | 53270555  | 53271049  | Gm10447       | ENSMUSG000000072963 | -190  | 0.24 | 0.11 | 0.12 | 0.18 | 0.13 | 0.21 |
| chr11 | 103558746 | 103559407 | Gosr2         | ENSMUSG000000020946 | -68   | 0.32 | 0.17 | 0.12 | 0.13 | 0.14 | 0.16 |
| chr11 | 103195113 | 103195627 | Arhgap27      | ENSMUSG000000034255 | 33    | 0.43 | 0.35 | 0.2  | 0.39 | 0.29 | 0.2  |
| chr11 | 5761776   | 5762360   | Aebp1         | ENSMUSG000000020473 | 118   | 0.11 | 0.23 | 0.15 | 0.24 | 0.26 | 0.12 |
| chr11 | 59600692  | 59601240  | Pld6          | ENSMUSG000000043648 | 178   | 0.5  | 0.17 | 0.17 | 0.18 | 0.15 | 0.19 |
| chr11 | 78002108  | 78002980  | Rab34         | ENSMUSG000000002059 | 263   | 0.15 | 0.21 | 0.08 | 0.17 | 0.1  | 0.13 |
| chr11 | 96838541  | 96839047  | Sp2           | ENSMUSG000000018678 | 208   | 0.4  | 0.27 | 0.1  | 0.18 | 0.23 | 0.07 |
| chr11 | 117734333 | 117734810 | Tha1          | ENSMUSG000000017713 | 142   | 0.4  | 0.23 | 0.15 | 0.18 | 0.24 | 0.17 |
| chr11 | 45793559  | 45794446  | Sox30         | ENSMUSG000000040489 | 190   | 0.22 | 0.15 | 0.23 | 0.29 | 0.16 | 0.27 |
| chr11 | 96175853  | 96176303  | Hoxb4         | ENSMUSG000000038692 | -1920 | 0.15 | 0.15 | 0.15 | 0.15 | 0.09 | 0.13 |
| chr11 | 100956506 | 100957030 | Psmc3ip       | ENSMUSG000000019303 | -78   | 0.2  | 0.21 | 0.1  | 0.12 | 0.11 | 0.12 |
| chr11 | 102086048 | 102086353 | Hdac5         | ENSMUSG000000008855 | -131  | 0.21 | 0.13 | 0.21 | 0.17 | 0.08 | 0.23 |
| chr11 | 120050724 | 120051437 | 2810410L24Rik | ENSMUSG000000075389 | 86    | 0.07 | 0.08 | 0.14 | 0.14 | 0.21 | 0.11 |
| chr11 | 66866036  | 66866452  | 2310004I24Rik | ENSMUSG000000020910 | -172  | 0.07 | 0.2  | 0.16 | 0.23 | 0.18 | 0.19 |
| chr11 | 60540343  | 60540766  | Flii          | ENSMUSG000000002812 | 171   | 0.14 | 0.11 | 0.1  | 0.13 | 0.09 | 0.14 |
| chr11 | 95198273  | 95198926  | Fam117a       | ENSMUSG000000038893 | 267   | 0.09 | 0.16 | 0.12 | 0.14 | 0.15 | 0.19 |
| chr11 | 58717541  | 58717806  | Zfp39         | ENSMUSG000000037001 | 54    | 0.4  | 0.15 | 0.12 | 0.18 | 0.12 | 0.19 |
| chr11 | 52578020  | 52578775  | Fstl4         | ENSMUSG000000036264 | 261   | 0.15 | 0.11 | 0.07 | 0.18 | 0.11 | 0.14 |
| chr11 | 95925917  | 95926841  | Ube2z         | ENSMUSG000000014349 | 323   | 0.15 | 0.2  | 0.14 | 0.13 | 0.1  | 0.18 |
| chr11 | 5161165   | 5162090   | Kremen1       | ENSMUSG000000020393 | -66   | 0.14 | 0.18 | 0.11 | 0.15 | 0.08 | 0.14 |
| chr11 | 69160057  | 69160302  | Chd3          | ENSMUSG000000018474 | 457   | 0.89 | 0.92 | 0.88 | 0.91 | 0.97 | 0.98 |
| chr11 | 70577581  | 70578104  | Zfp3          | ENSMUSG000000043602 | 131   | 0.09 | 0.14 | 0.1  | 0.17 | 0.16 | 0.15 |
| chr11 | 109334435 | 109335417 | Slc16a6       | ENSMUSG000000041920 | -413  | 0.18 | 0.2  | 0.1  | 0.22 | 0.11 | 0.14 |
| chr11 | 105927206 | 105927726 | Taco1         | ENSMUSG00000001983  | 91    | 0.16 | 0.34 | 0.17 | 0.18 | 0.27 | 0.17 |
| chr11 | 69579516  | 69580080  | Zbtb4         | ENSMUSG000000018750 | 280   | 0.14 | 0.11 | 0.16 | 0.2  | 0.29 | 0.17 |
| chr11 | 103221534 | 103222227 | Arhgap27      | ENSMUSG000000034255 | 334   | 0.09 | 0.13 | 0.08 | 0.1  | 0.06 | 0.14 |
| chr11 | 116442015 | 116442966 | Ube2o         | ENSMUSG000000020802 | 271   | 0.17 | 0.14 | 0.11 | 0.11 | 0.11 | 0.11 |
| chr11 | 58791397  | 58792198  | 2310058D17Rik | ENSMUSG000000085379 | -245  | 0.11 | 0.22 | 0.09 | 0.17 | 0.2  | 0.13 |
| chr11 | 51577105  | 51577348  | Sec24a        | ENSMUSG000000036391 | -90   | 0.17 | NA   | 0.08 | 0.19 | 0.04 | 0.17 |

|       |           |           |               |                    |       |      |      |      |      |      |      |
|-------|-----------|-----------|---------------|--------------------|-------|------|------|------|------|------|------|
| chr11 | 82721492  | 82722011  | Nle1          | ENSMUSG00000020692 | 93    | 0.21 | 0.13 | 0.12 | 0.16 | 0.12 | 0.2  |
| chr11 | 32542317  | 32543180  | Fbxw11        | ENSMUSG00000020271 | 24    | 0.07 | 0.11 | 0.08 | 0.18 | 0.1  | 0.1  |
| chr11 | 115464878 | 115465945 | Gga3          | ENSMUSG00000020740 | -373  | 0.09 | 0.24 | 0.13 | 0.12 | 0.16 | 0.14 |
| chr11 | 119089407 | 119089801 | Tbc1d16       | ENSMUSG00000039976 | 209   | 0.37 | 0.22 | 0.12 | 0.27 | 0.26 | 0.13 |
| chr11 | 59623211  | 59623561  | Ficn          | ENSMUSG00000032633 | -173  | 0.55 | 0.33 | 0.1  | 0.29 | 0.3  | 0.11 |
| chr11 | 118768614 | 118768956 | Rbfox3        | ENSMUSG00000025576 | 534   | 1    | 0.31 | 0.19 | 0.3  | 0.38 | 0.12 |
| chr11 | 118902064 | 118904427 | Cbx8          | ENSMUSG00000025578 | -1100 | 0.24 | 0.49 | 0.13 | 0.18 | 0.14 | 0.19 |
| chr11 | 72951373  | 72951892  | Gsg2          | ENSMUSG00000050107 | 164   | 0.1  | 0.14 | 0.11 | 0.16 | 0.16 | 0.12 |
| chr11 | 100480398 | 100481154 | Nkiras2       | ENSMUSG00000017837 | 218   | 0.56 | 0.64 | 0.13 | 0.21 | 0.31 | 0.14 |
| chr11 | 65601118  | 65601899  | Map2k4        | ENSMUSG00000033352 | 279   | 0.13 | 0.09 | 0.11 | 0.13 | 0.09 | 0.08 |
| chr11 | 79067521  | 79068414  | Wsb1          | ENSMUSG00000017677 | 5     | 0.1  | 0.1  | 0.11 | 0.18 | 0.15 | 0.16 |
| chr11 | 119947710 | 119948400 | Azi1          | ENSMUSG00000039781 | 86    | 0.11 | 0.12 | 0.13 | 0.15 | 0.06 | 0.14 |
| chr11 | 101121810 | 101122181 | Wnk4          | ENSMUSG00000035112 | 114   | 0.21 | 0.19 | 0.14 | 0.15 | 0.12 | 0.17 |
| chr11 | 107330378 | 107332129 | Pitpnc1       | ENSMUSG00000040430 | 760   | 0.34 | 0.34 | 0.14 | 0.19 | 0.23 | 0.2  |
| chr11 | 120391865 | 120392313 | Gm11789       | ENSMUSG00000084983 | -221  | 0.47 | 0.55 | 0.23 | 0.45 | 0.24 | 0.23 |
| chr11 | 103634856 | 103635736 | Wnt3          | ENSMUSG00000000125 | -168  | 0.41 | 0.21 | 0.12 | 0.2  | 0.28 | 0.15 |
| chr11 | 80623675  | 80624122  | Tmem98        | ENSMUSG00000035413 | 221   | 0.12 | 0.1  | 0.08 | 0.12 | 0.27 | 0.12 |
| chr11 | 100216627 | 100217488 | Hap1          | ENSMUSG00000006930 | -360  | 0.21 | 0.29 | 0.19 | 0.18 | 0.12 | 0.2  |
| chr11 | 97560211  | 97562030  | Pcgf2         | ENSMUSG00000018537 | -225  | 0.09 | 0.1  | 0.11 | 0.17 | 0.12 | 0.13 |
| chr11 | 102635347 | 102636166 | Adam11        | ENSMUSG00000020926 | 361   | 0.13 | NA   | 0.1  | 0.26 | 0.27 | 0.32 |
| chr11 | 94334631  | 94335946  | Cacna1g       | ENSMUSG00000020866 | -357  | 0.17 | 0.2  | 0.15 | 0.2  | 0.2  | 0.18 |
| chr11 | 113479996 | 113481071 | Sstr2         | ENSMUSG00000047904 | -123  | 0.12 | 0.14 | 0.12 | 0.17 | 0.2  | 0.17 |
| chr11 | 72420527  | 72422003  | Ube2g1        | ENSMUSG00000020794 | 480   | 0.16 | 0.1  | 0.09 | 0.15 | 0.12 | 0.14 |
| chr11 | 115891590 | 115892043 | Unk           | ENSMUSG00000020770 | 180   | 0.45 | 0.37 | 0.49 | 1    | 0.9  | 0.34 |
| chr11 | 32354567  | 32356177  | Ubtg2         | ENSMUSG00000044949 | 2     | 0.21 | 0.17 | 0.07 | 0.15 | 0.12 | 0.13 |
| chr11 | 17853291  | 17853987  | Etaa1         | ENSMUSG00000016984 | 239   | 0.05 | 0.13 | 0.1  | 0.13 | 0.08 | 0.14 |
| chr11 | 120493964 | 120495080 | Mafg          | ENSMUSG00000051510 | 348   | 0.17 | 0.14 | 0.12 | 0.12 | 0.11 | 0.13 |
| chr11 | 79152694  | 79153731  | Nf1           | ENSMUSG00000020716 | 17    | 0.31 | 0.24 | 0.18 | 0.19 | 0.22 | 0.16 |
| chr11 | 95006365  | 95007620  | A730090H04Rik | ENSMUSG00000086552 | 625   | 0.08 | 0.16 | 0.11 | 0.16 | 0.14 | 0.13 |
| chr11 | 101034982 | 101035612 | Ccr10         | ENSMUSG00000044052 | 1460  | 0.17 | 0.18 | 0.17 | 0.13 | 0.1  | 0.18 |

|       |           |           |               |                    |      |      |      |      |      |      |      |
|-------|-----------|-----------|---------------|--------------------|------|------|------|------|------|------|------|
| chr11 | 59928626  | 59929055  | 4930412M03Rik | ENSMUSG00000051008 | -108 | 0.56 | 0.21 | 0.12 | 0.22 | 0.24 | 0.1  |
| chr11 | 34646864  | 34647412  | Ccdc99        | ENSMUSG00000069910 | -44  | 0.12 | 0.14 | 0.14 | 0.23 | 0.03 | 0.14 |
| chr11 | 35611013  | 35612177  | Fbl1          | ENSMUSG00000051062 | 791  | 0.08 | 0.1  | 0.08 | 0.19 | 0.15 | 0.09 |
| chr11 | 65620683  | 65621000  | Zkscan6       | ENSMUSG00000018347 | 95   | 0.13 | 0.06 | 0.05 | 0.11 | 0.07 | 0.08 |
| chr11 | 66338727  | 66340388  | Shisa6        | ENSMUSG00000053930 | -260 | 0.18 | 0.09 | 0.11 | 0.15 | 0.14 | 0.13 |
| chr11 | 67734984  | 67736044  | 9130017K11Rik | ENSMUSG00000055134 | 508  | 0.11 | 0.17 | 0.1  | 0.17 | 0.17 | 0.17 |
| chr11 | 70832568  | 70833478  | Derl2         | ENSMUSG00000018442 | -309 | 0.29 | 0.5  | 0.16 | 0.24 | 0.47 | 0.14 |
| chr11 | 114952764 | 114953138 | Rab37         | ENSMUSG00000020732 | 206  | 0.25 | 0.24 | 0.18 | 0.36 | 0.55 | 0.24 |
| chr11 | 115281033 | 115281608 | Atp5h         | ENSMUSG00000034566 | -89  | 0.04 | 0.18 | 0.2  | 0.23 | 0.08 | 0.18 |
| chr11 | 6447037   | 6447255   | Ccm2          | ENSMUSG00000000378 | 233  | 0.21 | 0.34 | 0.18 | 0.18 | 0.08 | 0.13 |
| chr11 | 43518782  | 43519033  | Pwwp2a        | ENSMUSG00000044950 | 162  | 0.71 | 0.67 | 0.66 | 0.89 | 0.89 | 0.79 |
| chr11 | 54679837  | 54680486  | Hint1         | ENSMUSG00000020267 | 276  | 0.1  | 0.09 | 0.09 | 0.1  | 0.07 | 0.13 |
| chr11 | 54335926  | 54336673  | Rapgef6       | ENSMUSG00000037533 | -50  | 0.15 | 0.21 | 0.09 | 0.14 | 0.07 | 0.17 |
| chr11 | 57981659  | 57982114  | Gemin5        | ENSMUSG00000037275 | 155  | 0.06 | 0.1  | 0.08 | 0.09 | 0.1  | 0.11 |
| chr11 | 70513469  | 70514392  | Inca1         | ENSMUSG00000057054 | -347 | 0.21 | 0.17 | 0.12 | 0.2  | 0.17 | 0.14 |
| chr11 | 79902823  | 79903180  | Atad5         | ENSMUSG00000017550 | 99   | 0.16 | 0.2  | 0.1  | 0.18 | 0.08 | 0.13 |
| chr11 | 79967533  | 79968187  | Adap2         | ENSMUSG00000020709 | 253  | 0.08 | 0.14 | 0.17 | 0.19 | 0.17 | 0.14 |
| chr11 | 86170781  | 86171926  | Med13         | ENSMUSG00000034297 | -249 | 0.2  | 0.11 | 0.18 | 0.16 | 0.14 | 0.16 |
| chr11 | 102254588 | 102255116 | Rundc3a       | ENSMUSG00000006575 | 135  | 0.22 | 0.17 | 0.13 | 0.18 | 0.15 | 0.13 |
| chr11 | 103510827 | 103511652 | Rprml         | ENSMUSG00000046215 | 416  | 0.07 | 0.06 | 0.14 | 0.09 | 0.11 | 0.16 |
| chr11 | 106992941 | 106993537 | Bptf          | ENSMUSG00000040481 | -3   | 0.08 | 0.08 | 0.09 | 0.19 | 0.13 | 0.14 |
| chr11 | 121098016 | 121098851 | Narf          | ENSMUSG00000000056 | -134 | 0.07 | 0.1  | 0.07 | 0.13 | 0.16 | 0.09 |
| chr11 | 29724791  | 29725496  | 4931440F15Rik | ENSMUSG00000078157 | 525  | 0.71 | 0.83 | 0.29 | 0.63 | 0.52 | 0.38 |
| chr11 | 33100452  | 33104334  | Tlx3          | ENSMUSG00000040610 | 1195 | 0.09 | 0.1  | 0.14 | 0.22 | 0.07 | 0.16 |
| chr11 | 51419494  | 51420600  | Hnrnpab       | ENSMUSG00000020358 | 302  | 0.12 | 0.1  | 0.12 | 0.16 | 0.07 | 0.19 |
| chr11 | 58989926  | 58990856  | Gjc2          | ENSMUSG00000043448 | 792  | 0.08 | 0.16 | 0.14 | 0.14 | 0.13 | 0.28 |
| chr11 | 69714815  | 69715811  | Neur14        | ENSMUSG00000047284 | -5   | 0.06 | 0.06 | 0.09 | 0.15 | 0.08 | 0.15 |
| chr11 | 95447608  | 95448088  | Ngfr          | ENSMUSG00000000120 | 1201 | 0.42 | 0.48 | 0.13 | 0.44 | 1    | 0.18 |
| chr11 | 118109001 | 118110292 | Cyth1         | ENSMUSG00000017132 | 170  | 0.12 | 0.15 | 0.09 | 0.14 | 0.15 | 0.13 |
| chr11 | 120092236 | 120092908 | 2900052L18Rik | ENSMUSG00000043993 | 327  | 0.1  | 0.09 | 0.13 | 0.12 | 0.14 | 0.13 |



|       |           |           |               |                     |      |      |      |      |      |      |      |
|-------|-----------|-----------|---------------|---------------------|------|------|------|------|------|------|------|
| chr11 | 44332190  | 44332804  | Rnf145        | ENSMUSG00000019189  | 31   | 0.12 | 0.16 | 0.1  | 0.17 | 0.17 | 0.11 |
| chr11 | 47801910  | 47802674  | Sgcd          | ENSMUSG00000020354  | 179  | 0.17 | 0.36 | 0.1  | 0.14 | 0.24 | 0.1  |
| chr11 | 49057373  | 49057955  | Mgat1         | ENSMUSG00000020346  | -29  | 0.3  | 0.27 | 0.17 | 0.12 | 0.14 | 0.12 |
| chr11 | 69659807  | 69660173  | Plscr3        | ENSMUSG00000019461  | 112  | 0.26 | 0.11 | 0.11 | 0.11 | 0.16 | 0.12 |
| chr11 | 70658223  | 70658556  | Rabep1        | ENSMUSG00000020817  | 124  | 0.05 | 0.07 | 0.08 | 0.11 | 0.08 | 0.12 |
| chr11 | 74985840  | 74987357  | 1700016P03Rik | ENSMUSG000000085609 | 536  | 0.18 | 0.21 | 0.14 | 0.21 | 0.29 | 0.18 |
| chr11 | 78510568  | 78511074  | Nik           | ENSMUSG00000017376  | 54   | 0.1  | 0.08 | 0.1  | 0.14 | 0.06 | 0.09 |
| chr11 | 90110538  | 90111136  | Mmd           | ENSMUSG00000003948  | 67   | 0.17 | 0.09 | 0.13 | 0.15 | 0.12 | 0.12 |
| chr11 | 98299969  | 98300375  | 1810046J19Rik | ENSMUSG00000002580  | 133  | 0.06 | 0.09 | 0.07 | 0.12 | 0.11 | 0.15 |
| chr11 | 105153517 | 105154251 | Mrc2          | ENSMUSG00000020695  | -73  | 1    | 0.88 | 0.15 | 0.43 | 0.38 | 0.17 |
| chr11 | 119959778 | 119960624 | 2410002I01Rik | ENSMUSG000000025377 | -187 | 0.6  | 0.36 | 0.14 | 0.33 | 0.19 | 0.21 |
| chr11 | 22412239  | 22412876  | Tmem17        | ENSMUSG00000049904  | 466  | 0.13 | 0.15 | 0.11 | 0.19 | 0.1  | 0.15 |
| chr11 | 64248574  | 64250137  | Hs3st3a1      | ENSMUSG00000047759  | 521  | 0.15 | 0.36 | 0.17 | 0.33 | 0.26 | 0.2  |
| chr11 | 98273621  | 98274449  | Erb2          | ENSMUSG00000062312  | 251  | 0.1  | 0.14 | 0.14 | 0.13 | 0.15 | 0.16 |
| chr11 | 100126857 | 100127060 | Krt42         | ENSMUSG00000053654  | 334  | 0.98 | 0.9  | 0.92 | 1    | 0.88 | 0.92 |
| chr11 | 100484118 | 100484364 | Nkiras2       | ENSMUSG00000017837  | 51   | 0.17 | 0.12 | 0.08 | 0.15 | 0.05 | 0.16 |
| chr11 | 102260883 | 102261334 | Rundc3a       | ENSMUSG00000006575  | 38   | 0.4  | 0.28 | 0.45 | 0.51 | 0.31 | 0.39 |
| chr11 | 118430393 | 118431723 | Rbfox3        | ENSMUSG00000025576  | 166  | 0.11 | 0.11 | 0.09 | 0.13 | 0.08 | 0.12 |
| chr11 | 121534062 | 121534760 | B3gnt11       | ENSMUSG00000046605  | 56   | 0.15 | 0.13 | 0.21 | 0.22 | 0.09 | 0.12 |
| chr11 | 50872774  | 50872998  | Zfp354a       | ENSMUSG00000020364  | 90   | 0.11 | 0.35 | 0.12 | 0.18 | 0.33 | 0.1  |
| chr11 | 60023861  | 60024273  | Sreb1         | ENSMUSG00000020538  | -173 | 0.38 | 0.71 | 0.18 | 0.13 | 0.73 | 0.19 |
| chr11 | 101326950 | 101327676 | Vat1          | ENSMUSG00000034993  | 231  | 0.1  | 0.14 | 0.07 | 0.18 | 0.16 | 0.13 |
| chr11 | 31571346  | 31572009  | Bod1          | ENSMUSG00000044502  | 50   | 0.2  | 0.14 | 0.14 | 0.18 | 0.15 | 0.13 |
| chr11 | 61575343  | 61575637  | Prpsap2       | ENSMUSG00000020528  | 24   | 0.23 | 0.2  | 0.07 | 0.08 | 0.33 | 0.14 |
| chr11 | 103273570 | 103274329 | Plekhm1       | ENSMUSG00000034247  | 29   | 0.21 | 0.21 | 0.08 | 0.2  | 0.11 | 0.14 |
| chr11 | 21900855  | 21902263  | Otx1          | ENSMUSG00000005917  | 17   | 0.14 | 0.21 | 0.14 | 0.16 | 0.18 | 0.14 |
| chr11 | 43276802  | 43277061  | Gm12151       | ENSMUSG000000084307 | 56   | 0.8  | 0.84 | 0.89 | 0.84 | 0.9  | 0.97 |
| chr11 | 59953242  | 59954048  | Rai1          | ENSMUSG00000062115  | 61   | 0.12 | 0.08 | 0.11 | 0.13 | 0.21 | 0.16 |
| chr11 | 72973740  | 72974076  | P2rx5         | ENSMUSG00000005950  | -15  | 0.06 | 0.06 | 0.11 | 0.14 | 0.09 | 0.15 |
| chr11 | 72990054  | 72991220  | Tmem93        | ENSMUSG00000047260  | -133 | 0.43 | 0.23 | 0.12 | 0.27 | 0.24 | 0.12 |

|       |           |           |               |                    |      |      |      |      |      |      |      |
|-------|-----------|-----------|---------------|--------------------|------|------|------|------|------|------|------|
| chr11 | 84339454  | 84339695  | Lhx1          | ENSMUSG00000018698 | -57  | 0.1  | 0.14 | 0.13 | 0.2  | 0.22 | 0.14 |
| chr11 | 98843482  | 98844343  | Gjd3          | ENSMUSG00000047197 | 418  | 0.09 | 0.07 | 0.09 | 0.11 | 0.13 | 0.18 |
| chr11 | 106648776 | 106650821 | Ddx5          | ENSMUSG00000020719 | -17  | 0.15 | 0.16 | 0.11 | 0.15 | 0.18 | 0.13 |
| chr11 | 106889059 | 106889908 | 1810010H24Rik | ENSMUSG00000078607 | 51   | 0.16 | 0.14 | 0.12 | 0.16 | 0.11 | 0.13 |
| chr11 | 115352908 | 115353193 | Nt5c          | ENSMUSG00000020736 | 79   | 0.08 | 0.05 | 0.12 | 0.13 | 0.13 | 0.08 |
| chr11 | 18771462  | 18771948  | 8430419K02Rik | ENSMUSG00000085743 | 453  | 0.04 | 0.24 | 0.1  | 0.11 | 0.09 | 0.13 |
| chr11 | 30785287  | 30785607  | Gpr75         | ENSMUSG00000043999 | 89   | 0.12 | 0.12 | 0.13 | 0.13 | 0.2  | 0.12 |
| chr11 | 53793052  | 53793998  | Slc22a21      | ENSMUSG00000063652 | -153 | 0.2  | 0.14 | 0.1  | 0.1  | 0.12 | 0.16 |
| chr11 | 53841196  | 53842078  | Slc22a4       | ENSMUSG00000020334 | -183 | 0.09 | 0.13 | 0.1  | 0.15 | 0.13 | 0.12 |
| chr11 | 69153815  | 69154547  | A030009H04Rik | ENSMUSG00000043419 | 218  | 0.07 | NA   | 0.13 | 0.14 | 1    | 0.14 |
| chr11 | 96777430  | 96778117  | D030028A08Rik | ENSMUSG00000078700 | 189  | 0.38 | 0.1  | 0.16 | 0.14 | 0.12 | 0.14 |
| chr11 | 102807216 | 102808181 | C1q1          | ENSMUSG00000045532 | 304  | 0.1  | 0.12 | 0.08 | 0.14 | 0.14 | 0.15 |
| chr11 | 116099359 | 116099592 | Evpl          | ENSMUSG00000034282 | -84  | 0.34 | 0.59 | 0.06 | 0.13 | 0.19 | 0.19 |
| chr11 | 120298481 | 120299108 | Nploc4        | ENSMUSG00000039703 | 228  | 0.08 | 0.14 | 0.1  | 0.2  | 0.11 | 0.15 |
| chr11 | 44431735  | 44432128  | Ebf1          | ENSMUSG00000057098 | 250  | 0.11 | 0.1  | 0.09 | 0.16 | 0.17 | 0.14 |
| chr11 | 49525524  | 49526459  | Cnot6         | ENSMUSG00000020362 | 221  | 0.16 | 0.11 | 0.1  | 0.2  | 0.12 | 0.1  |
| chr11 | 80241970  | 80242784  | Psmc11        | ENSMUSG00000017428 | 260  | 0.11 | 0.1  | 0.11 | 0.14 | 0.09 | 0.11 |
| chr11 | 93816714  | 93817376  | Nme2          | ENSMUSG00000020857 | 52   | 0.18 | 0.21 | 0.13 | 0.17 | 0.13 | 0.15 |
| chr11 | 96205403  | 96205743  | Hoxb3         | ENSMUSG00000048763 | 490  | 0.07 | 0.14 | 0.11 | 0.18 | 0.14 | 0.12 |
| chr11 | 101887780 | 101888264 | Mpp3          | ENSMUSG00000052373 | 47   | 0.08 | 0.11 | 0.12 | 0.19 | 0.14 | 0.15 |
| chr11 | 4886843   | 4887277   | Ap1b1         | ENSMUSG00000009090 | 152  | 0.16 | 0.1  | 0.08 | 0.15 | 0.09 | 0.13 |
| chr11 | 16157542  | 16157945  | Vstm2a        | ENSMUSG00000048834 | 16   | 1    | NA   | 0.11 | 0.36 | 0.1  | 0.19 |
| chr11 | 20012373  | 20013196  | Actr2         | ENSMUSG00000020152 | 86   | 0.17 | 0.15 | 0.12 | 0.15 | 0.12 | 0.1  |
| chr11 | 30549110  | 30549612  | Acyp2         | ENSMUSG00000060923 | 226  | 0.14 | 0.1  | 0.09 | 0.13 | 0.05 | 0.1  |
| chr11 | 30854309  | 30854643  | Erlec1        | ENSMUSG00000020311 | -141 | 0.19 | 0.15 | 0.1  | 0.17 | 0.29 | 0.15 |
| chr11 | 62352003  | 62352939  | Cenpv         | ENSMUSG00000018509 | -340 | 0.09 | 0.08 | 0.12 | 0.14 | 0.12 | 0.13 |
| chr11 | 62692832  | 62693190  | Fam18b        | ENSMUSG00000014177 | 54   | 0.06 | 0.12 | 0.33 | 0.08 | 0.1  | 0.23 |
| chr11 | 68859142  | 68859612  | Aurkb         | ENSMUSG00000020897 | 228  | 0.06 | 0.11 | 0.1  | 0.14 | 0.24 | 0.19 |
| chr11 | 70376204  | 70376698  | Mink1         | ENSMUSG00000020827 | 68   | 0.07 | 0.07 | 0.06 | 0.1  | 0.05 | 0.07 |
| chr11 | 75344603  | 75345673  | Slc43a2       | ENSMUSG00000038178 | -58  | 0.21 | 0.11 | 0.11 | 0.19 | 0.14 | 0.2  |

|       |           |           |               |                     |      |      |      |      |      |      |      |
|-------|-----------|-----------|---------------|---------------------|------|------|------|------|------|------|------|
| chr11 | 77328407  | 77329490  | Abhd15        | ENSMUSG00000000686  | 325  | 0.17 | 0.09 | 0.11 | 0.16 | 0.12 | 0.15 |
| chr11 | 77795924  | 77796864  | Phf12         | ENSMUSG000000037791 | 138  | 0.22 | 0.23 | 0.11 | 0.15 | 0.18 | 0.13 |
| chr11 | 86357702  | 86358488  | Rps6kb1       | ENSMUSG000000020516 | 172  | 0.18 | 0.14 | 0.12 | 0.13 | 0.14 | 0.15 |
| chr11 | 32105054  | 32105668  | Snrnp25       | ENSMUSG000000040767 | -54  | 1    | 0.07 | 0.09 | 0.31 | 0.1  | 0.14 |
| chr11 | 53113120  | 53114264  | Hspa4         | ENSMUSG000000020361 | 221  | 0.12 | 0.15 | 0.11 | 0.22 | 0.16 | 0.16 |
| chr11 | 58143631  | 58144390  | Gm9900        | ENSMUSG000000053218 | -169 | 0.24 | 0.11 | 0.11 | 0.13 | 0.07 | 0.21 |
| chr11 | 76486206  | 76486712  | Bhlha9        | ENSMUSG000000044243 | 487  | 0.1  | 0.15 | 0.12 | 0.13 | 0.17 | 0.16 |
| chr11 | 101031657 | 101032648 | Plekhh3       | ENSMUSG000000035172 | -484 | 0.15 | 0.32 | 0.12 | 0.27 | 0.1  | 0.14 |
| chr11 | 105945219 | 105946566 | Map3k3        | ENSMUSG000000020700 | -35  | 0.32 | 0.15 | 0.12 | 0.19 | 0.26 | 0.17 |
| chr11 | 117127393 | 117128050 | 9-Sep         | ENSMUSG000000059248 | 161  | 0.29 | 0.43 | 0.12 | 0.38 | 0.44 | 0.2  |
| chr11 | 118947266 | 118947690 | Cbx4          | ENSMUSG000000039989 | 57   | 0.06 | 0.08 | 0.1  | 0.15 | 0.09 | 0.12 |
| chr11 | 119251268 | 119252124 | Mir1932       | ENSMUSG000000088015 | -90  | 0.09 | 0.11 | 0.13 | 0.16 | 0.06 | 0.13 |
| chr11 | 46125166  | 46125960  | Cyfp2         | ENSMUSG000000020340 | 159  | 0.1  | 0.19 | 0.1  | 0.14 | 0.14 | 0.11 |
| chr11 | 75300152  | 75300740  | Prpf8         | ENSMUSG000000020850 | 167  | 0.12 | 0.16 | 0.19 | 0.26 | 0.25 | 0.14 |
| chr11 | 95573912  | 95574839  | Zfp652        | ENSMUSG000000075595 | 388  | 0.14 | 0.22 | 0.11 | 0.16 | 0.19 | 0.16 |
| chr11 | 102558889 | 102559266 | Ccdc43        | ENSMUSG000000020925 | -93  | 0.57 | 0.15 | 0.08 | 0.16 | 0.26 | 0.22 |
| chr11 | 115375017 | 115375868 | Hn1           | ENSMUSG000000020737 | -12  | 0.17 | 0.37 | 0.11 | 0.19 | 0.11 | 0.16 |
| chr11 | 117515373 | 117517329 | Tnrc6c        | ENSMUSG000000025571 | 748  | 0.1  | 0.11 | 0.11 | 0.14 | 0.12 | 0.16 |
| chr11 | 58976812  | 58977272  | A230051G13Rik | ENSMUSG000000049287 | -223 | 0.28 | 0.43 | 0.11 | 0.17 | 0.37 | 0.09 |
| chr11 | 59652664  | 59653360  | Nt5m          | ENSMUSG000000032615 | 63   | 0.27 | 0.15 | 0.15 | 0.12 | 0.16 | 0.18 |
| chr11 | 82577358  | 82578293  | Cct6b         | ENSMUSG000000020698 | -17  | 0.16 | 0.11 | 0.12 | 0.16 | 0.09 | 0.19 |
| chr11 | 98543890  | 98544312  | Psmc3         | ENSMUSG000000017221 | 196  | 0.09 | 0.16 | 0.1  | 0.16 | 0.13 | 0.18 |
| chr11 | 116295195 | 116296132 | Fam100b       | ENSMUSG000000050628 | 255  | 0.12 | 0.28 | 0.12 | 0.17 | 0.19 | 0.21 |
| chr11 | 116937939 | 116938376 | 2810008D09Rik | ENSMUSG000000086859 | 53   | 0.47 | 1    | 0.13 | 0.27 | 0.14 | 0.13 |
| chr11 | 60726953  | 60727451  | Gm16515       | ENSMUSG000000018931 | 112  | 0.27 | 0.2  | 0.12 | 0.17 | 0.16 | 0.12 |
| chr11 | 75275009  | 75275818  | 2210403K04Rik | ENSMUSG000000085148 | 372  | 0.15 | 0.13 | 0.16 | 0.2  | 0.08 | 0.18 |
| chr11 | 105317831 | 105318180 | 10-Mar        | ENSMUSG000000078627 | 44   | 0.24 | 0.36 | 0.21 | 0.52 | 0.36 | 0.28 |
| chr11 | 107408112 | 107409767 | Helz          | ENSMUSG000000020721 | -305 | 0.57 | 0.53 | 0.2  | 0.26 | 0.47 | 0.19 |
| chr11 | 109286798 | 109287671 | Amz2          | ENSMUSG000000020610 | -26  | 0.36 | 0.12 | 0.1  | 0.12 | 0.26 | 0.16 |
| chr11 | 116167741 | 116168170 | Exoc7         | ENSMUSG000000020792 | 11   | 0.11 | 0.11 | 0.12 | 0.24 | 0.3  | 0.19 |

|       |           |           |               |                    |      |      |      |      |      |      |      |
|-------|-----------|-----------|---------------|--------------------|------|------|------|------|------|------|------|
| chr11 | 120345810 | 120346298 | Mrpl12        | ENSMUSG00000039640 | 127  | 0.12 | 0.07 | 0.09 | 0.16 | 0.06 | 0.11 |
| chr11 | 62271778  | 62272115  | Pigl          | ENSMUSG00000014245 | 159  | 0.16 | 0.33 | 0.19 | 0.23 | 0.28 | 0.17 |
| chr11 | 74536911  | 74538205  | Pafah1b1      | ENSMUSG00000020745 | -198 | 0.09 | 0.1  | 0.12 | 0.12 | 0.14 | 0.13 |
| chr11 | 75993003  | 75993423  | Vps53         | ENSMUSG00000017288 | -195 | 0.08 | NA   | 0.21 | 0.32 | 0.3  | 0.11 |
| chr11 | 83276195  | 83276643  | Mmp28         | ENSMUSG00000020682 | 44   | 0.08 | 0.15 | 0.11 | 0.15 | 0.11 | 0.21 |
| chr11 | 96132369  | 96134109  | Hoxb9         | ENSMUSG00000020875 | 468  | 0.12 | 0.13 | 0.13 | 0.15 | 0.15 | 0.15 |
| chr11 | 97521352  | 97521867  | AL596123.1    | ENSMUSG00000093004 | 32   | 0.05 | 0.06 | 0.1  | 0.13 | 0.08 | 0.13 |
| chr11 | 115835976 | 115836523 | Itgb4         | ENSMUSG00000020758 | 226  | 0.09 | 0.16 | 0.11 | 0.13 | 0.15 | 0.16 |
| chr11 | 116135066 | 116135539 | Srp68         | ENSMUSG00000020780 | 147  | 0.07 | 0.13 | 0.14 | 0.19 | 0.1  | 0.18 |
| chr11 | 22758860  | 22759999  | 9130230N09Rik | ENSMUSG00000092626 | 498  | 0.13 | 0.12 | 0.08 | 0.15 | 0.1  | 0.14 |
| chr11 | 74584266  | 74584636  | Mettl16       | ENSMUSG00000010554 | 119  | 0.15 | 0.27 | 0.1  | 0.18 | 0.08 | 0.15 |
| chr11 | 75006758  | 75008884  | Rtn4r1        | ENSMUSG00000045287 | 536  | 0.09 | 0.17 | 0.1  | 0.13 | 0.11 | 0.15 |
| chr11 | 97011912  | 97013116  | Tbkbp1        | ENSMUSG00000038517 | -164 | 0.2  | 0.1  | 0.09 | 0.16 | 0.16 | 0.15 |
| chr11 | 3528954   | 3529567   | Gm11950       | ENSMUSG00000084310 | 433  | 0.22 | 0.16 | 0.13 | 0.17 | 0.15 | 0.13 |
| chr11 | 20148924  | 20149715  | Cep68         | ENSMUSG00000044066 | 67   | 0.25 | 0.16 | 0.14 | 0.13 | 0.37 | 0.18 |
| chr11 | 35793424  | 35794214  | Wwc1          | ENSMUSG00000018849 | 210  | 0.17 | 0.21 | 0.13 | 0.17 | 0.23 | 0.22 |
| chr11 | 68245520  | 68245754  | Pik3r5        | ENSMUSG00000020901 | 14   | 0.43 | 0.36 | 0.16 | 0.3  | 0.27 | 0.16 |
| chr11 | 69778887  | 69780366  | Cldn7         | ENSMUSG00000018569 | 728  | 0.1  | 0.16 | 0.14 | 0.13 | 0.13 | 0.18 |
| chr11 | 86070627  | 86070899  | Ints2         | ENSMUSG00000018068 | 79   | 1    | 0.06 | 0.11 | 0.1  | 0.11 | 0.32 |
| chr11 | 89864071  | 89864333  | Pctp          | ENSMUSG00000020553 | 6    | 0.09 | 0.18 | 0.09 | 0.22 | 0.18 | 0.18 |
| chr11 | 115970824 | 115971782 | Trim47        | ENSMUSG00000020773 | 248  | 0.21 | 0.16 | 0.12 | 0.18 | 0.16 | 0.25 |
| chr11 | 116351077 | 116351799 | Prpsap1       | ENSMUSG00000015869 | 165  | 0.13 | 0.1  | 0.1  | 0.12 | 0.07 | 0.11 |
| chr11 | 118280100 | 118280571 | Cant1         | ENSMUSG00000025575 | 2    | 0.07 | 0.08 | 0.07 | 0.11 | 0.09 | 0.11 |
| chr11 | 120239582 | 120240206 | 2310003H01Rik | ENSMUSG00000025384 | -106 | 0.07 | 0.13 | 0.11 | 0.15 | 0.13 | 0.14 |
| chr11 | 3308805   | 3309342   | Limk2         | ENSMUSG00000020451 | 104  | 0.09 | 0.08 | 0.08 | 0.12 | 0.14 | 0.15 |
| chr11 | 22760385  | 22760709  | B3gnt2        | ENSMUSG00000051650 | -59  | 0.23 | 0.5  | 0.31 | 0.25 | 0.15 | 0.11 |
| chr11 | 31865601  | 31866053  | 4930524B15Rik | ENSMUSG00000020299 | 235  | 0.52 | 0.53 | 0.75 | 0.75 | 0.58 | 0.47 |
| chr11 | 76384547  | 76385068  | Abr           | ENSMUSG00000017631 | 60   | 0.15 | 0.24 | 0.12 | 0.17 | 0.23 | 0.16 |
| chr11 | 78074919  | 78075865  | 2610507B11Rik | ENSMUSG00000010277 | 138  | 0.07 | 0.31 | 0.13 | 0.07 | 0.1  | 0.15 |
| chr11 | 94871129  | 94871880  | Samd14        | ENSMUSG00000047181 | 311  | 0.14 | 0.23 | 0.12 | 0.17 | 0.1  | 0.11 |

|       |           |           |               |                    |       |      |      |      |      |      |      |
|-------|-----------|-----------|---------------|--------------------|-------|------|------|------|------|------|------|
| chr11 | 32167338  | 32167732  | Npri3         | ENSMUSG00000020289 | 12    | 0.05 | 0.09 | 0.07 | 0.14 | 0.08 | 0.15 |
| chr11 | 51912038  | 51913149  | Ppp2ca        | ENSMUSG00000020349 | 410   | 0.1  | 0.12 | 0.1  | 0.16 | 0.08 | 0.12 |
| chr11 | 102170270 | 102170785 | Ubf           | ENSMUSG00000020923 | 227   | 0.15 | 0.35 | 0.2  | 0.19 | 0.29 | 0.2  |
| chr11 | 4795285   | 4795836   | Thoc5         | ENSMUSG00000034274 | 237   | 0.14 | 0.1  | 0.1  | 0.14 | 0.08 | 0.11 |
| chr11 | 60988042  | 60988968  | Usp22         | ENSMUSG00000042506 | 26    | 0.3  | 0.41 | 0.12 | 0.18 | 0.23 | 0.22 |
| chr11 | 78363934  | 78364578  | Tmem97        | ENSMUSG00000037278 | 23    | 0.15 | 0.14 | 0.13 | 0.15 | 0.09 | 0.18 |
| chr11 | 87171633  | 87172776  | Ppm1e         | ENSMUSG00000046442 | -65   | 0.11 | 0.17 | 0.09 | 0.15 | 0.08 | 0.14 |
| chr11 | 96145303  | 96145965  | Hoxb7         | ENSMUSG00000038721 | 63    | 0.42 | NA   | 0.13 | 0.13 | 0.28 | 0.18 |
| chr11 | 96147991  | 96148763  | Hoxb7         | ENSMUSG00000038721 | -1652 | 0.07 | 0.11 | 0.12 | 0.19 | 0.09 | 0.17 |
| chr11 | 104469141 | 104469663 | Itgb3         | ENSMUSG00000020689 | 88    | 0.07 | 0.15 | 0.11 | 0.12 | 0.11 | 0.14 |
| chr11 | 116976073 | 116977263 | Sec14l1       | ENSMUSG00000020823 | 186   | 0.09 | 0.19 | 0.1  | 0.13 | 0.1  | 0.12 |
| chr11 | 120353202 | 120353653 | Slc25a10      | ENSMUSG00000025792 | 225   | 0.13 | 0.11 | 0.17 | 0.17 | 0.1  | 0.12 |
| chr11 | 3794620   | 3795480   | 4921536K21Rik | ENSMUSG00000020434 | 51    | 0.31 | 0.3  | 0.15 | 0.27 | 0.18 | 0.27 |
| chr11 | 16652217  | 16653083  | Egfr          | ENSMUSG00000020122 | 417   | 0.15 | 0.2  | 0.13 | 0.14 | 0.08 | 0.12 |
| chr11 | 26493361  | 26493788  | Vrk2          | ENSMUSG00000064090 | 29    | 0.49 | 0.48 | 0.23 | 0.26 | 0.41 | 0.26 |
| chr11 | 33413021  | 33413849  | Ranbp17       | ENSMUSG00000040594 | -341  | 0.07 | 0.08 | 0.09 | 0.13 | 0.06 | 0.11 |
| chr11 | 69647525  | 69647842  | Nlgn2         | ENSMUSG00000051790 | 78    | 0.18 | 0.16 | 0.15 | 0.23 | 0.22 | 0.22 |
| chr11 | 76307994  | 76308723  | Abr           | ENSMUSG00000017631 | 128   | 0.09 | 0.13 | 0.11 | 0.13 | 0.13 | 0.11 |
| chr11 | 87550753  | 87551409  | Supt4h1       | ENSMUSG00000020485 | 27    | 1    | NA   | 0.14 | NA   | 0.5  | NA   |
| chr11 | 105042098 | 105043746 | Tik2          | ENSMUSG00000020694 | 81    | 0.15 | 0.18 | 0.13 | 0.22 | 0.18 | 0.18 |
| chr11 | 69614379  | 69615136  | Fgf11         | ENSMUSG00000042826 | 461   | 0.07 | 0.08 | 0.13 | 0.15 | 0.09 | 0.09 |
| chr11 | 115674594 | 115675211 | Caskin2       | ENSMUSG00000034471 | 42    | 0.25 | 0.11 | 0.27 | 0.41 | 0.15 | 0.32 |
| chr11 | 50729217  | 50729747  | Zfp2          | ENSMUSG00000049321 | 151   | 0.32 | 0.32 | 0.1  | 0.25 | 0.09 | 0.19 |
| chr11 | 52174006  | 52175368  | Vdac1         | ENSMUSG00000020402 | 325   | 0.11 | 0.15 | 0.13 | 0.16 | 0.15 | 0.1  |
| chr11 | 58762528  | 58762837  | Hist3h2ba     | ENSMUSG00000056895 | 269   | 0.07 | 0.09 | 0.27 | 0.24 | 0.05 | 0.25 |
| chr11 | 77500452  | 77501335  | Nufip2        | ENSMUSG00000037857 | -68   | 0.2  | 0.23 | 0.11 | 0.15 | 0.16 | 0.16 |
| chr11 | 87800274  | 87801156  | Dynll2        | ENSMUSG00000020483 | 143   | 0.11 | 0.18 | 0.09 | 0.13 | 0.14 | 0.11 |
| chr11 | 119803598 | 119804952 | Gm11767       | ENSMUSG00000085207 | -263  | 0.15 | 0.13 | 0.11 | 0.2  | 0.12 | 0.13 |
| chr11 | 121215093 | 121215914 | Wdr45l        | ENSMUSG00000025173 | 152   | 0.17 | 0.28 | 0.14 | 0.22 | 0.22 | 0.19 |
| chr11 | 68198430  | 68200228  | Ntn1          | ENSMUSG00000020902 | 999   | 0.11 | 0.16 | 0.1  | 0.16 | 0.09 | 0.13 |

|       |           |           |               |                    |      |      |      |      |      |      |      |
|-------|-----------|-----------|---------------|--------------------|------|------|------|------|------|------|------|
| chr11 | 74432745  | 74433536  | E130309D14Rik | ENSMUSG00000069814 | 33   | 0.12 | 0.09 | 0.11 | 0.17 | 0.17 | 0.11 |
| chr11 | 76659683  | 76660549  | Cpd           | ENSMUSG00000020841 | 404  | 0.11 | 0.08 | 0.11 | 0.15 | 0.08 | 0.12 |
| chr11 | 85124537  | 85125540  | Ppm1d         | ENSMUSG00000020525 | 292  | 0.41 | 0.23 | 0.11 | 0.25 | 0.32 | 0.2  |
| chr11 | 116713393 | 116715217 | Srsf2         | ENSMUSG00000093603 | -905 | 0.09 | 0.07 | 0.09 | 0.12 | 0.08 | 0.1  |
| chr11 | 5737358   | 5738082   | Polm          | ENSMUSG00000020474 | 35   | 0.41 | 0.33 | 0.1  | 0.14 | 0.14 | 0.12 |
| chr11 | 62094746  | 62095436  | Zswim7        | ENSMUSG00000014243 | -214 | 0.08 | 0.09 | 0.08 | 0.14 | 0.09 | 0.09 |
| chr11 | 77990085  | 77990798  | Nek8          | ENSMUSG00000017405 | -328 | 0.09 | 0.08 | 0.11 | 0.14 | 0.15 | 0.12 |
| chr11 | 79805977  | 79807356  | Suz12         | ENSMUSG00000017548 | 58   | 0.27 | 0.31 | 0.16 | 0.14 | 0.22 | 0.14 |
| chr11 | 87405099  | 87405880  | Mtmr4         | ENSMUSG00000018401 | -175 | 0.15 | 0.39 | 0.11 | 0.17 | 0.29 | 0.15 |
| chr11 | 95865884  | 95869132  | Igf2bp1       | ENSMUSG00000013415 | -254 | 0.16 | 0.12 | 0.13 | 0.16 | 0.13 | 0.16 |
| chr11 | 100258508 | 100259260 | Jup           | ENSMUSG0000001552  | 179  | 0.09 | 0.07 | 0.08 | 0.12 | 0.07 | 0.11 |
| chr11 | 115885029 | 115885988 | H3f3b         | ENSMUSG00000016559 | 279  | 0.11 | 0.11 | 0.11 | 0.11 | 0.08 | 0.13 |
| chr11 | 116514966 | 116515265 | Gm11744       | ENSMUSG00000075410 | -54  | 0.21 | 0.2  | 0.07 | 0.13 | 0.1  | 0.1  |
| chr11 | 121313192 | 121313559 | Tbcd          | ENSMUSG00000039230 | 112  | 0.15 | 0.2  | 0.15 | 0.2  | 1    | 0.11 |
| chr11 | 22890520  | 22891100  | Cct4          | ENSMUSG00000007739 | 184  | 0.16 | 0.1  | 0.11 | 0.11 | 0.23 | 0.1  |
| chr11 | 75492623  | 75493210  | Crk           | ENSMUSG00000017776 | 155  | 0.11 | 0.15 | 0.08 | 0.13 | 0.14 | 0.11 |
| chr11 | 79404384  | 79405055  | Rab11fip4     | ENSMUSG00000017639 | 5    | 0.08 | 0.1  | 0.08 | 0.15 | 0.13 | 0.09 |
| chr11 | 94515041  | 94515317  | Mrpl27        | ENSMUSG00000024414 | 98   | 0.42 | 0.13 | 0.22 | 0.22 | 0.7  | 0.24 |
| chr11 | 116779935 | 116780771 | Mgat5b        | ENSMUSG00000043857 | 176  | 0.14 | 0.12 | 0.1  | 0.17 | 0.2  | 0.15 |
| chr11 | 54117411  | 54117970  | Acsi6         | ENSMUSG00000020333 | 183  | 0.14 | 0.07 | 0.09 | 0.13 | 0.09 | 0.14 |
| chr11 | 61392446  | 61393306  | Epn2          | ENSMUSG0000001036  | 284  | 0.15 | 0.21 | 0.13 | 0.15 | 0.13 | 0.12 |
| chr11 | 77284992  | 77285228  | Ankrd13b      | ENSMUSG00000037907 | 462  | 0.79 | 0.46 | 0.56 | 1    | 0.89 | 0.77 |
| chr11 | 100275363 | 100276170 | Leprel4       | ENSMUSG00000006931 | 244  | 0.18 | 0.1  | 0.13 | 0.16 | 0.14 | 0.15 |
| chr11 | 20730503  | 20731352  | 1110067D22Rik | ENSMUSG00000042363 | -169 | 0.13 | 0.11 | 0.09 | 0.12 | 0.15 | 0.1  |
| chr11 | 29592881  | 29593945  | Rtn4          | ENSMUSG00000020458 | 466  | 0.17 | 0.14 | 0.09 | 0.12 | 0.12 | 0.13 |
| chr11 | 57822713  | 57823594  | Larp1         | ENSMUSG00000037331 | 587  | 0.09 | 0.06 | 0.08 | 0.15 | 0.07 | 0.15 |
| chr11 | 59119913  | 59121173  | Wnt9a         | ENSMUSG00000000126 | 113  | 0.11 | 0.09 | 0.09 | 0.14 | 0.08 | 0.11 |
| chr11 | 61080370  | 61080995  | Aldh3a2       | ENSMUSG00000010025 | -53  | 0.14 | 0.12 | 0.16 | 0.2  | 0.09 | 0.14 |
| chr11 | 68781219  | 68781785  | Slc25a35      | ENSMUSG00000018740 | -131 | 0.29 | 0.18 | 0.19 | 0.27 | 0.24 | 0.2  |
| chr11 | 115243128 | 115243651 | Cdr2l         | ENSMUSG00000050910 | 159  | 0.16 | 0.19 | 0.1  | 0.13 | 0.13 | 0.21 |

|       |           |           |               |                    |       |      |      |      |      |      |      |
|-------|-----------|-----------|---------------|--------------------|-------|------|------|------|------|------|------|
| chr11 | 6428551   | 6428935   | Gm11974       | ENSMUSG00000085156 | 6     | 0.25 | 0.1  | 0.16 | 0.17 | 0.1  | 0.18 |
| chr11 | 29273357  | 29274184  | Ccdc88a       | ENSMUSG00000032740 | 112   | 0.14 | 0.12 | 0.11 | 0.14 | 0.11 | 0.15 |
| chr11 | 61890425  | 61890857  | Specc1        | ENSMUSG00000042331 | 115   | 0.67 | 0.33 | 0.12 | 0.1  | 0.24 | 0.19 |
| chr11 | 96180121  | 96180576  | Mir10a        | ENSMUSG00000092205 | 1869  | 0.08 | 0.13 | 0.13 | 0.15 | 0.11 | 0.15 |
| chr11 | 115264973 | 115265527 | Ict1          | ENSMUSG00000018858 | 184   | 0.2  | 0.14 | 0.09 | 0.2  | 0.15 | 0.17 |
| chr11 | 23565437  | 23566438  | Pex13         | ENSMUSG00000020283 | -264  | 0.1  | 0.21 | 0.07 | 0.14 | 0.06 | 0.16 |
| chr11 | 69840356  | 69840637  | Dlg4          | ENSMUSG00000020886 | 170   | 0.5  | 0.16 | 0.15 | 0.15 | 0.14 | 0.19 |
| chr11 | 95896177  | 95896400  | Snf8          | ENSMUSG0000006058  | 89    | 0.15 | 0.27 | 0.14 | 0.17 | 0.22 | 0.1  |
| chr11 | 120209185 | 120211752 | Actg1         | ENSMUSG00000062825 | -685  | 0.12 | 0.18 | 0.15 | 0.17 | 0.15 | 0.17 |
| chr11 | 120684887 | 120686309 | Fasn          | ENSMUSG00000025153 | -106  | 0.13 | 0.15 | 0.1  | 0.14 | 0.16 | 0.13 |
| chr11 | 4957948   | 4958538   | Ras10a        | ENSMUSG00000034209 | 112   | 0.08 | 0.09 | 0.11 | 0.18 | 0.07 | 0.11 |
| chr11 | 6167410   | 6167899   | Ddx56         | ENSMUSG0000004393  | 95    | 0.07 | NA   | 0.2  | 0.16 | 0.2  | 0.2  |
| chr11 | 29925815  | 29926104  | Eml6          | ENSMUSG00000044072 | 74    | 0.15 | NA   | 0.08 | 0.15 | 0.07 | 0.17 |
| chr11 | 50023779  | 50024443  | Sqstm1        | ENSMUSG00000015837 | 156   | 0.54 | 0.6  | 0.21 | 0.24 | 0.75 | 0.1  |
| chr11 | 72503304  | 72503834  | Ankfy1        | ENSMUSG00000020790 | 61    | 0.18 | 0.18 | 0.09 | 0.23 | 0.13 | 0.17 |
| chr11 | 80965217  | 80967224  | Accn1         | ENSMUSG00000020704 | 603   | 0.09 | 0.15 | 0.1  | 0.17 | 0.11 | 0.13 |
| chr11 | 83992825  | 83993920  | Acaca         | ENSMUSG00000020532 | 59    | 0.13 | 0.24 | 0.1  | 0.16 | 0.16 | 0.18 |
| chr11 | 115228350 | 115229156 | C630004H02Rik | ENSMUSG00000034586 | 170   | 0.24 | 0.2  | 0.15 | 0.26 | 0.19 | 0.15 |
| chr11 | 115336824 | 115337410 | Armc7         | ENSMUSG00000057219 | 136   | 0.25 | 0.48 | 0.07 | 0.18 | 0.42 | 0.15 |
| chr11 | 77845510  | 77846270  | Dhrs13        | ENSMUSG00000020834 | 108   | 0.26 | 0.28 | 0.16 | 0.18 | 0.22 | 0.17 |
| chr11 | 77851474  | 77851727  | Flot2         | ENSMUSG00000061981 | 114   | 0.17 | 0.22 | 0.06 | 0.09 | 0.11 | 0.19 |
| chr11 | 84455863  | 84456429  | AL603708.1    | ENSMUSG00000078015 | -1642 | 0.18 | 0.12 | 0.17 | 0.2  | 0.13 | 0.26 |
| chr11 | 88835140  | 88835650  | Coil          | ENSMUSG00000033983 | 146   | 0.09 | 0.09 | 0.11 | 0.14 | 0.12 | 0.1  |
| chr11 | 89162688  | 89164156  | Nog           | ENSMUSG00000048616 | 451   | 0.13 | 0.11 | 0.08 | 0.13 | 0.11 | 0.13 |
| chr11 | 94361122  | 94361355  | Epn3          | ENSMUSG00000010080 | -15   | 0.33 | 0.15 | 0.1  | 0.16 | 0.05 | 0.14 |
| chr11 | 120469828 | 120470234 | Npb           | ENSMUSG00000044034 | 212   | 0.09 | 0.04 | 0.11 | 0.19 | 0.13 | 0.14 |
| chr11 | 17059073  | 17059986  | Ppp3r1        | ENSMUSG00000033953 | 263   | 0.12 | 0.12 | 0.12 | 0.15 | 0.14 | 0.1  |
| chr11 | 69571615  | 69572821  | Polr2a        | ENSMUSG00000005198 | -493  | 0.15 | 0.11 | 0.09 | 0.18 | 0.12 | 0.14 |
| chr11 | 70467227  | 70469738  | Pfn1          | ENSMUSG00000018293 | -382  | 0.13 | 0.13 | 0.12 | 0.19 | 0.14 | 0.13 |
| chr11 | 75840530  | 75841546  | Fam101b       | ENSMUSG00000020846 | 246   | 0.11 | 0.18 | 0.09 | 0.15 | 0.1  | 0.12 |

|       |           |           |          |                     |      |      |      |      |      |      |      |
|-------|-----------|-----------|----------|---------------------|------|------|------|------|------|------|------|
| chr11 | 116688998 | 116689470 | Mxra7    | ENSMUSG00000020814  | 83   | 0.15 | 0.14 | 0.09 | 0.18 | 0.13 | 0.12 |
| chr11 | 70068646  | 70068849  | Alox12   | ENSMUSG00000000320  | 96   | 0.15 | 0.19 | 0.14 | 0.11 | 0.23 | 0.14 |
| chr11 | 96206967  | 96207587  | Hoxb3os  | ENSMUSG000000084844 | 1960 | 0.16 | 0.15 | 0.14 | 0.2  | 0.1  | 0.18 |
| chr11 | 104092377 | 104094260 | Mapt     | ENSMUSG00000018411  | 614  | 0.12 | 0.11 | 0.08 | 0.1  | 0.09 | 0.14 |
| chr11 | 51669829  | 51671991  | Phf15    | ENSMUSG00000020387  | -283 | 0.13 | 0.09 | 0.12 | 0.15 | 0.11 | 0.13 |
| chr11 | 53243972  | 53244764  | Uqcrq    | ENSMUSG00000044894  | -39  | 0.2  | 0.15 | 0.16 | 0.26 | 0.12 | 0.11 |
| chr11 | 69484736  | 69486126  | Eif4a1   | ENSMUSG000000059796 | -479 | 0.1  | 0.16 | 0.13 | 0.17 | 0.13 | 0.18 |
| chr11 | 102978534 | 102979301 | Hexim1   | ENSMUSG00000048878  | 1278 | 0.21 | 0.1  | 0.19 | 0.23 | 0.16 | 0.22 |
| chr11 | 115024337 | 115025517 | Slc9a3r1 | ENSMUSG00000020733  | 272  | 0.09 | 0.17 | 0.08 | 0.17 | 0.12 | 0.11 |
| chr11 | 46250417  | 46251156  | Med7     | ENSMUSG00000020397  | 359  | 0.3  | 0.29 | 0.23 | 0.25 | 0.39 | 0.15 |
| chr11 | 54600534  | 54601450  | Cdc42se2 | ENSMUSG000000052298 | 135  | 0.12 | 0.09 | 0.1  | 0.14 | 0.09 | 0.14 |
| chr11 | 77307064  | 77307495  | Git1     | ENSMUSG00000011877  | 215  | 0.08 | 0.07 | 0.13 | 0.14 | 0.1  | 0.15 |
| chr11 | 100501363 | 100501922 | Zfp385c  | ENSMUSG00000014198  | -559 | 0.14 | 0.18 | 0.13 | 0.16 | 0.11 | 0.13 |
| chr11 | 116273605 | 116274743 | Rnf157   | ENSMUSG000000052949 | 144  | 0.09 | 0.08 | 0.08 | 0.11 | 0.11 | 0.11 |
| chr11 | 29414876  | 29415194  | Prorsd1  | ENSMUSG000000032673 | -29  | 0.38 | NA   | 0.13 | 0.12 | 0.14 | 0.41 |
| chr11 | 100599391 | 100599892 | Rab5c    | ENSMUSG00000019173  | -151 | 0.35 | 0.23 | 0.32 | 0.35 | 0.43 | 0.21 |
| chr11 | 100620830 | 100621431 | Kcnh4    | ENSMUSG000000035355 | -113 | 0.11 | 0.19 | 0.1  | 0.19 | 0.16 | 0.1  |
| chr11 | 101286286 | 101287031 | Rundc1   | ENSMUSG000000035007 | 259  | 0.1  | 0.18 | 0.13 | 0.15 | 0.08 | 0.17 |
| chr11 | 102006843 | 102007328 | Nags     | ENSMUSG000000048217 | 222  | 0.06 | 0.09 | 0.09 | 0.13 | 0.08 | 0.12 |
| chr11 | 108286308 | 108287055 | Ccdc46   | ENSMUSG000000020728 | 175  | 0.16 | 0.39 | 0.14 | 0.14 | 0.19 | 0.19 |
| chr11 | 116485002 | 116485695 | Rhbdf2   | ENSMUSG000000020806 | 166  | 0.33 | 0.17 | NA   | NA   | 0.12 | 0.4  |
| chr11 | 121691489 | 121691895 | Ptchd3   | ENSMUSG000000039198 | 160  | 0.61 | 0.87 | 0.51 | 0.83 | 0.77 | 0.46 |
| chr11 | 70027315  | 70028263  | Slc16a11 | ENSMUSG000000040938 | 377  | 0.19 | 0.08 | 0.15 | 0.16 | 0.3  | 0.17 |
| chr11 | 90548662  | 90549133  | Tom1l1   | ENSMUSG000000020541 | -4   | 0.11 | 0.36 | 0.11 | 0.18 | 0.19 | 0.12 |
| chr11 | 5778006   | 5778496   | Pold2    | ENSMUSG000000020471 | -36  | 0.07 | 0.08 | 0.06 | 0.16 | 0.16 | 0.11 |
| chr11 | 23976383  | 23977912  | Gm12063  | ENSMUSG000000085167 | 588  | 0.19 | 0.12 | 0.1  | 0.17 | 0.15 | 0.15 |
| chr11 | 52045244  | 52045975  | Skp1a    | ENSMUSG000000036309 | 112  | 0.13 | 0.26 | 0.12 | 0.16 | 0.1  | 0.25 |
| chr11 | 53914297  | 53914874  | P4ha2    | ENSMUSG000000018906 | 159  | 0.12 | 0.16 | 0.14 | 0.17 | 0.11 | 0.16 |
| chr11 | 68504801  | 68505736  | Myh10    | ENSMUSG000000020900 | 207  | 0.14 | 0.08 | 0.12 | 0.18 | 0.12 | 0.19 |
| chr11 | 87666634  | 87666842  | Mks1     | ENSMUSG000000034121 | 21   | 0.22 | 0.21 | 0.21 | 0.11 | 0.15 | 0.16 |



|       |           |           |               |                     |      |      |      |      |      |      |      |
|-------|-----------|-----------|---------------|---------------------|------|------|------|------|------|------|------|
| chr11 | 98768927  | 98769402  | Cdc6          | ENSMUSG00000017499  | 49   | 0.13 | 0.24 | 0.05 | 0.14 | 0.09 | 0.15 |
| chr11 | 8910917   | 8911326   | Hus1          | ENSMUSG00000020413  | 10   | 0.17 | 0.13 | 0.09 | 0.1  | 0.07 | 0.08 |
| chr11 | 12364571  | 12364927  | Cobl          | ENSMUSG00000020173  | 6    | 0.07 | 0.06 | 0.15 | 0.13 | 0.33 | 0.13 |
| chr11 | 76435739  | 76437352  | Abr           | ENSMUSG00000017631  | -729 | 0.13 | 0.14 | 0.11 | 0.13 | 0.16 | 0.14 |
| chr11 | 79524380  | 79525726  | Mir193        | ENSMUSG000000065395 | -418 | 0.09 | 0.11 | 0.07 | 0.14 | 0.1  | 0.13 |
| chr11 | 92959613  | 92961510  | Car10         | ENSMUSG000000056158 | 843  | 0.22 | 0.12 | 0.13 | 0.22 | 0.27 | 0.13 |
| chr11 | 108204271 | 108205456 | Apoh          | ENSMUSG00000000049  | 195  | 0.1  | 0.11 | 0.09 | 0.13 | 0.11 | 0.12 |
| chr11 | 118898520 | 118899040 | Cbx8          | ENSMUSG00000025578  | 1330 | 0.08 | 0.14 | 0.11 | 0.1  | 0.13 | 0.23 |
| chr11 | 21138587  | 21139666  | Vps54         | ENSMUSG00000020128  | 234  | 0.11 | 0.12 | 0.1  | 0.12 | 0.1  | 0.15 |
| chr11 | 74403233  | 74403919  | Rap1gap2      | ENSMUSG000000038807 | 50   | 0.13 | 0.11 | 0.1  | 0.19 | 0.11 | 0.14 |
| chr11 | 96228115  | 96228335  | Hoxb1         | ENSMUSG000000018973 | 653  | 0.2  | 0.2  | 0.21 | 0.43 | 0.13 | 0.14 |
| chr11 | 98798668  | 98799452  | Rara          | ENSMUSG000000037992 | 48   | 0.07 | 0.1  | 0.1  | 0.14 | 0.1  | 0.14 |
| chr11 | 20531788  | 20532573  | Sertad2       | ENSMUSG000000049800 | 198  | 0.13 | 0.25 | 0.11 | 0.21 | 0.1  | 0.12 |
| chr11 | 26110158  | 26110727  | 5730522E02Rik | ENSMUSG000000073101 | 124  | 0.05 | 0.05 | 0.11 | 0.12 | 0.08 | 0.14 |
| chr11 | 34934498  | 34935508  | Slit3         | ENSMUSG000000056427 | 277  | 0.07 | 0.23 | 0.1  | 0.15 | 0.09 | 0.16 |
| chr11 | 43341964  | 43342989  | Ccnj1         | ENSMUSG000000044707 | 190  | 0.1  | 0.14 | 0.09 | 0.12 | 0.08 | 0.1  |
| chr11 | 62061999  | 62062946  | Adora2b       | ENSMUSG000000018500 | -14  | 0.14 | 0.1  | 0.07 | 0.14 | 0.09 | 0.1  |
| chr11 | 69139781  | 69140344  | Kcnab3        | ENSMUSG000000018470 | 302  | 0.21 | 0.35 | 0.15 | 0.31 | 0.24 | 0.23 |
| chr11 | 77420714  | 77421657  | Taok1         | ENSMUSG000000017291 | 132  | 0.17 | 0.12 | 0.11 | 0.21 | 0.14 | 0.17 |
| chr11 | 83286123  | 83287265  | Taf15         | ENSMUSG000000020680 | 106  | 0.18 | 0.23 | 0.1  | 0.16 | 0.22 | 0.15 |
| chr11 | 100333234 | 100334200 | Klhl11        | ENSMUSG000000048732 | 338  | 0.17 | 0.24 | 0.12 | 0.18 | 0.12 | 0.14 |
| chr11 | 116059793 | 116060454 | Acox1         | ENSMUSG000000020777 | -80  | 0.18 | 0.28 | 0.16 | 0.24 | 0.13 | 0.21 |
| chr11 | 120534214 | 120534851 | Aspscr1       | ENSMUSG000000025142 | 245  | 0.11 | 0.12 | 0.08 | 0.17 | 0.09 | 0.12 |
| chr11 | 3435669   | 3435987   | Smtn          | ENSMUSG000000020439 | 1573 | 0.16 | 0.18 | 0.07 | 0.16 | 0.12 | 0.17 |
| chr11 | 5607310   | 5607802   | Mrps24        | ENSMUSG000000020477 | 89   | 0.14 | 0.2  | 0.1  | 0.16 | 0.11 | 0.13 |
| chr11 | 8564112   | 8564652   | Tns3          | ENSMUSG000000020422 | 156  | 0.23 | 0.45 | 0.13 | 0.15 | 0.19 | 0.13 |
| chr11 | 43247184  | 43247481  | Slu7          | ENSMUSG000000020409 | 86   | 0.11 | 0.05 | 0.09 | 0.14 | 0.16 | 0.17 |
| chr11 | 53672526  | 53672920  | Gm12216       | ENSMUSG000000081769 | -77  | 0.23 | 0.12 | 0.12 | 0.18 | 0.33 | 0.18 |
| chr11 | 60691758  | 60692671  | Tmem11        | ENSMUSG000000043284 | 75   | 0.08 | 0.1  | 0.09 | 0.18 | 0.1  | 0.15 |
| chr11 | 97223321  | 97224732  | Socs7         | ENSMUSG000000038485 | 161  | 0.14 | 0.15 | 0.08 | 0.13 | 0.16 | 0.12 |

|       |           |           |               |                    |       |      |      |      |      |      |      |
|-------|-----------|-----------|---------------|--------------------|-------|------|------|------|------|------|------|
| chr11 | 101502746 | 101503059 | U2            | ENSMUSG00000064702 | -160  | 0.1  | 0.31 | 0.39 | 0.39 | 0.05 | 0.28 |
| chr11 | 102268571 | 102269170 | Slc25a39      | ENSMUSG00000018677 | -241  | 0.1  | 0.1  | 0.09 | 0.11 | 0.08 | 0.08 |
| chr11 | 4118126   | 4118617   | Gatsl3        | ENSMUSG00000020424 | 143   | 0.18 | 0.13 | 0.11 | 0.1  | 0.2  | 0.12 |
| chr11 | 4965021   | 4965400   | Gas2l1        | ENSMUSG00000034201 | 70    | 0.17 | 0.16 | 0.1  | 0.17 | 0.22 | 0.14 |
| chr11 | 5051987   | 5052562   | Emid1         | ENSMUSG00000034164 | -49   | 0.2  | 0.37 | 0.18 | 0.21 | 0.12 | 0.23 |
| chr11 | 16851079  | 16851427  | 2810442l2lRik | ENSMUSG00000087060 | -168  | 0.6  | 0.67 | 0.29 | 1    | 1    | 0.12 |
| chr11 | 49607663  | 49608494  | Gfpt2         | ENSMUSG00000020363 | 398   | 0.26 | 0.42 | 0.22 | 0.2  | 0.35 | 0.13 |
| chr11 | 53333248  | 53333772  | 8-Sep         | ENSMUSG00000018398 | 262   | 0.42 | 0.64 | 0.17 | 0.25 | 0.5  | 0.17 |
| chr11 | 100721598 | 100721924 | Stat5a        | ENSMUSG00000004043 | 102   | 0.67 | 0.42 | 0.14 | 0.13 | 0.4  | 0.16 |
| chr11 | 115309210 | 115309547 | Mir3968       | ENSMUSG00000093096 | -4    | 1    | 0.93 | 0.68 | 0.64 | 0.9  | 0.78 |
| chr11 | 70428854  | 70429229  | Chrne         | ENSMUSG00000014609 | 134   | 0.07 | 0.05 | 0.09 | 0.12 | 0.13 | 0.13 |
| chr11 | 71855700  | 71855907  | Fam64a        | ENSMUSG00000020808 | -154  | 0.71 | 0.17 | 0.07 | 0.22 | 0.59 | 0.2  |
| chr11 | 72254529  | 72255041  | Mybbp1a       | ENSMUSG00000040463 | -72   | 1    | NA   | 0.18 | 0.29 | 0.22 | 0.18 |
| chr11 | 77326329  | 77327123  | Trp53i13      | ENSMUSG00000044328 | -189  | 0.5  | 1    | 0.13 | 0.16 | 0.11 | 0.17 |
| chr11 | 84683070  | 84684496  | Ggnbp2        | ENSMUSG00000020530 | -79   | 0.13 | 0.23 | 0.13 | 0.19 | 0.16 | 0.21 |
| chr11 | 88579154  | 88580441  | Msi2          | ENSMUSG00000069769 | -382  | 0.24 | 0.49 | 0.11 | 0.17 | 0.38 | 0.16 |
| chr11 | 120095101 | 120099415 | Gm11772       | ENSMUSG00000085501 | 178   | 0.13 | 0.1  | 0.1  | 0.14 | 0.14 | 0.13 |
| chr11 | 6315428   | 6316454   | Ppia          | ENSMUSG00000071866 | 495   | 0.1  | 0.13 | 0.09 | 0.13 | 0.12 | 0.12 |
| chr11 | 21903783  | 21904054  | Otx1          | ENSMUSG00000005917 | -1018 | 0.27 | NA   | 0.14 | 0.29 | 0.42 | 0.24 |
| chr11 | 61318284  | 61318829  | 3110043A19Rik | ENSMUSG00000060808 | 5     | 0.15 | 0.12 | 0.13 | 0.17 | 0.09 | 0.16 |
| chr11 | 75813442  | 75813712  | 1700016K19Rik | ENSMUSG00000053783 | 163   | 0.05 | 0.1  | 0.2  | 0.16 | 0.12 | 0.11 |
| chr11 | 101968455 | 101968659 | Pyy           | ENSMUSG00000017311 | 173   | 0.15 | 0.19 | 0.11 | 0.17 | 0.12 | 0.1  |
| chr11 | 109472397 | 109473432 | Wipi1         | ENSMUSG00000041895 | -183  | 0.16 | 0.22 | 0.12 | 0.15 | 0.21 | 0.24 |
| chr11 | 121282927 | 121283160 | Fn3krp        | ENSMUSG00000039253 | 328   | 0.16 | 0.17 | 0.11 | 0.15 | 0.11 | 0.12 |
| chr11 | 51569469  | 51570324  | Sec24a        | ENSMUSG00000036391 | -296  | 0.19 | 0.15 | 0.12 | 0.15 | 0.17 | 0.18 |
| chr11 | 98054138  | 98054718  | Med1          | ENSMUSG00000018160 | -159  | 0.11 | 0.21 | 0.15 | 0.2  | 0.15 | 0.17 |
| chr11 | 100941030 | 100941364 | Hsd17b1       | ENSMUSG00000019301 | 1472  | 0.06 | 0.25 | 0.19 | 0.49 | 0.17 | 0.1  |
| chr11 | 113612171 | 113613390 | Cdc42ep4      | ENSMUSG00000041598 | -312  | 0.45 | 0.47 | 0.17 | 0.22 | 0.57 | 0.2  |
| chr11 | 120485765 | 120486383 | Sirt7         | ENSMUSG00000025138 | 209   | 0.14 | 0.17 | 0.11 | 0.19 | 0.12 | 0.14 |
| chr11 | 69809074  | 69811029  | Phf23         | ENSMUSG00000018572 | 772   | 0.25 | 0.2  | 0.14 | 0.17 | 0.28 | 0.15 |

|       |           |           |               |                    |       |      |      |      |      |      |      |
|-------|-----------|-----------|---------------|--------------------|-------|------|------|------|------|------|------|
| chr11 | 86014438  | 86015294  | Brip1         | ENSMUSG00000034329 | -200  | 0.2  | 0.54 | 0.17 | 0.13 | 0.34 | 0.18 |
| chr11 | 95775795  | 95776383  | B4galnt2      | ENSMUSG00000013418 | 116   | 0.1  | 0.1  | 0.16 | 0.2  | 0.07 | 0.13 |
| chr11 | 106054705 | 106054998 | Strada        | ENSMUSG00000069631 | -1    | 0.21 | 0.5  | 0.08 | 0.2  | 0.12 | 0.11 |
| chr11 | 5420601   | 5421785   | Xbp1          | ENSMUSG00000020484 | 531   | 0.29 | 0.37 | 0.1  | 0.18 | 0.21 | 0.17 |
| chr11 | 23981328  | 23982155  | Bcl11a        | ENSMUSG00000000861 | 1071  | 0.1  | 0.3  | 0.14 | 0.24 | 0.14 | 0.17 |
| chr11 | 26287147  | 26287495  | Fanc1         | ENSMUSG00000004018 | 119   | 0.25 | 0.21 | 0.11 | 0.29 | 1    | 0.25 |
| chr11 | 50038677  | 50038952  | Mgat4b        | ENSMUSG00000036620 | -23   | 0.13 | 0.19 | 0.09 | 0.13 | 0.16 | 0.16 |
| chr11 | 57458455  | 57459237  | Galnt10       | ENSMUSG00000020520 | -98   | 0.1  | 0.1  | 0.08 | 0.14 | 0.12 | 0.12 |
| chr11 | 74651150  | 74652254  | Mnt           | ENSMUSG00000000282 | 732   | 0.38 | 0.1  | 0.14 | 0.18 | 0.26 | 0.15 |
| chr11 | 87912581  | 87913459  | Cuedc1        | ENSMUSG00000018378 | 372   | 0.1  | 0.11 | 0.13 | 0.18 | 0.09 | 0.2  |
| chr11 | 88921314  | 88922253  | Dgke          | ENSMUSG00000000276 | 279   | 0.19 | 0.28 | 0.09 | 0.17 | 0.14 | 0.13 |
| chr11 | 98219562  | 98220050  | 1700003D09Rik | ENSMUSG00000085944 | -209  | 0.08 | 0.21 | 0.12 | 0.2  | 0.1  | 0.11 |
| chr11 | 98698074  | 98698708  | Rapgef1       | ENSMUSG00000038020 | 292   | 0.09 | 0.13 | 0.1  | 0.11 | 0.1  | 0.14 |
| chr11 | 104411323 | 104412152 | Cdc27         | ENSMUSG00000020687 | -31   | 0.08 | 0.12 | 0.14 | 0.18 | 0.1  | 0.1  |
| chr11 | 114626265 | 114626800 | Kif19a        | ENSMUSG00000010021 | -170  | 0.12 | 0.09 | 0.1  | 0.18 | 0.09 | 0.12 |
| chr11 | 120433790 | 120434999 | P4hb          | ENSMUSG00000025130 | -239  | 0.11 | 0.18 | 0.1  | 0.14 | 0.09 | 0.14 |
| chr11 | 50172593  | 50173367  | Mir804        | ENSMUSG00000076450 | -1599 | 0.5  | 0.5  | 0.19 | 0.75 | 0.22 | 0.26 |
| chr11 | 58790775  | 58791100  | 2310058D17Rik | ENSMUSG00000085379 | 615   | 0.08 | 0.08 | 0.1  | 0.13 | 0.1  | 0.19 |
| chr11 | 63736892  | 63737172  | Hs3st3b1      | ENSMUSG00000070407 | -1240 | 0.19 | NA   | 0.26 | 0.27 | 0.33 | 0.09 |
| chr11 | 68908658  | 68908862  | Per1          | ENSMUSG00000020893 | 41    | 0.2  | 0.17 | 0.1  | 0.13 | 0.36 | 0.22 |
| chr11 | 76015359  | 76015963  | Fam57a        | ENSMUSG00000069808 | 144   | 0.08 | 0.13 | 0.07 | 0.14 | 0.1  | 0.13 |
| chr11 | 29924479  | 29924998  | Eml6          | ENSMUSG00000044072 | 1295  | 0.13 | 0.25 | 0.1  | 0.15 | 0.11 | 0.12 |
| chr11 | 115685131 | 115686003 | Llg12         | ENSMUSG00000020782 | 204   | 0.1  | 0.06 | 0.09 | 0.17 | 0.12 | 0.17 |
| chr11 | 6289597   | 6289973   | Zmiz2         | ENSMUSG00000041164 | 311   | 0.39 | 0.24 | 0.29 | 0.64 | 0.5  | 0.23 |
| chr11 | 52096136  | 52096891  | Tcf7          | ENSMUSG00000000782 | 3     | 0.1  | 0.15 | 0.13 | 0.18 | 0.12 | 0.13 |
| chr11 | 53138106  | 53138319  | Zcchc10       | ENSMUSG00000018239 | 31    | 0.2  | 0.2  | 0.12 | 0.23 | 0.43 | 0.19 |
| chr11 | 96164515  | 96165435  | Hoxb5         | ENSMUSG00000038700 | 1066  | 0.36 | 0.12 | 0.13 | 0.16 | 0.14 | 0.16 |
| chr11 | 101645823 | 101646562 | Etv4          | ENSMUSG00000017724 | -30   | 0.17 | 0.12 | 0.13 | 0.29 | 0.2  | 0.19 |
| chr11 | 102090965 | 102091597 | Hdac5         | ENSMUSG00000008855 | 157   | 0.07 | 0.13 | 0.08 | 0.13 | 0.08 | 0.11 |
| chr11 | 119160934 | 119161733 | Eif4a3        | ENSMUSG00000025580 | -5    | 0.16 | 0.14 | 0.1  | 0.17 | 0.19 | 0.15 |

|       |           |           |               |                    |      |      |      |      |      |      |      |
|-------|-----------|-----------|---------------|--------------------|------|------|------|------|------|------|------|
| chr11 | 3763609   | 3763860   | Osbp2         | ENSMUSG00000020435 | 172  | 0.31 | 0.14 | 0.2  | 0.16 | 0.44 | 0.21 |
| chr11 | 23205844  | 23207266  | Usp34         | ENSMUSG00000056342 | -361 | 0.29 | 0.18 | 0.1  | 0.13 | 0.22 | 0.15 |
| chr11 | 50244138  | 50244673  | Rufy1         | ENSMUSG00000020375 | 222  | 0.11 | 0.14 | 0.13 | 0.12 | 0.13 | 0.17 |
| chr11 | 78349508  | 78350250  | Tnfaip1       | ENSMUSG00000017615 | -202 | 0.11 | 0.09 | 0.07 | 0.27 | 0.19 | 0.18 |
| chr11 | 35582797  | 35583594  | Pank3         | ENSMUSG00000018846 | 209  | 0.2  | 0.45 | 0.14 | 0.18 | 0.26 | 0.2  |
| chr11 | 61155939  | 61156443  | Slc47a2       | ENSMUSG00000069855 | -105 | 0.12 | 0.07 | 0.11 | 0.11 | 0.13 | 0.17 |
| chr11 | 69049104  | 69050124  | Gucy2e        | ENSMUSG00000020890 | 910  | 0.14 | 0.13 | 0.12 | 0.21 | 0.12 | 0.18 |
| chr11 | 70273045  | 70273271  | Zmynd15       | ENSMUSG00000040829 | 34   | 0.32 | 0.16 | 0.12 | 0.17 | 0.41 | 0.13 |
| chr11 | 94852212  | 94854304  | Ppp1r9b       | ENSMUSG00000038976 | 909  | 0.15 | 0.1  | 0.11 | 0.19 | 0.13 | 0.16 |
| chr11 | 108783859 | 108784328 | Axin2         | ENSMUSG00000000142 | -402 | 0.19 | 0.06 | 0.16 | 0.2  | 0.13 | 0.3  |
| chr11 | 113926227 | 113926641 | Sdk2          | ENSMUSG00000041592 | 855  | 0.08 | 0.05 | 0.06 | 0.11 | 0.14 | 0.09 |
| chr11 | 117641214 | 117641454 | Tmc6          | ENSMUSG00000025572 | -370 | 0.14 | 0.19 | 0.12 | 0.08 | 0.11 | 0.11 |
| chr11 | 9050403   | 9050649   | Gm11993       | ENSMUSG00000043177 | 65   | 0.75 | NA   | 0.91 | 1    | 1    | 0.95 |
| chr11 | 69609001  | 69609541  | Chrb1         | ENSMUSG00000041189 | 136  | 0.09 | NA   | 0.14 | 0.24 | 0.2  | 0.19 |
| chr11 | 102993615 | 102994425 | Hexim2        | ENSMUSG00000043372 | 277  | 0.14 | 0.16 | 0.1  | 0.14 | 0.16 | 0.19 |
| chr11 | 57911230  | 57911644  | Gm12247       | ENSMUSG00000081223 | -162 | 0.06 | 0.19 | 0.07 | 0.12 | 0.09 | 0.1  |
| chr11 | 62545083  | 62545469  | Zfp287        | ENSMUSG00000005267 | 111  | 0.17 | 0.09 | 0.1  | 0.16 | 0.14 | 0.15 |
| chr11 | 17157530  | 17157811  | C1d           | ENSMUSG00000000581 | 88   | 0.11 | 0.06 | 0.09 | 0.16 | 0.08 | 0.15 |
| chr11 | 60513196  | 60513573  | Lgl1          | ENSMUSG00000020536 | 159  | 0.05 | 0.13 | 0.1  | 0.1  | 0.08 | 0.09 |
| chr11 | 100800499 | 100800737 | Stat3         | ENSMUSG00000004040 | 76   | 0.21 | 0.43 | 0.08 | 0.22 | 0.32 | 0.15 |
| chr11 | 106860378 | 106860991 | Kpna2         | ENSMUSG00000018362 | -1   | 0.1  | 0.06 | 0.13 | 0.17 | 0.08 | 0.08 |
| chr11 | 6374941   | 6375780   | Gm11973       | ENSMUSG00000086839 | -68  | 0.11 | 0.3  | 0.17 | 0.17 | 0.12 | 0.15 |
| chr11 | 23670520  | 23671541  | Rel           | ENSMUSG00000020275 | -60  | 0.12 | 0.1  | 0.12 | 0.17 | 0.14 | 0.14 |
| chr11 | 29030675  | 29030955  | Pnpt1         | ENSMUSG00000020464 | 71   | 0.06 | 0.07 | 0.07 | 0.12 | 0.12 | 0.07 |
| chr11 | 63734011  | 63735952  | Hs3st3b1      | ENSMUSG00000070407 | 811  | 0.14 | 0.17 | 0.09 | 0.17 | 0.15 | 0.13 |
| chr11 | 70051027  | 70051915  | 0610010K14Rik | ENSMUSG00000020831 | -291 | 0.14 | 0.13 | 0.1  | 0.21 | 0.11 | 0.1  |
| chr11 | 96650359  | 96651116  | Cbx1          | ENSMUSG00000018666 | 296  | 0.12 | 0.06 | 0.1  | 0.29 | 0.25 | 0.14 |
| chr11 | 97913546  | 97914736  | Stac2         | ENSMUSG00000017400 | 635  | 0.09 | 0.08 | 0.07 | 0.12 | 0.1  | 0.12 |
| chr11 | 101087205 | 101087864 | Ezh1          | ENSMUSG00000006920 | 206  | 0.09 | 0.15 | 0.09 | 0.14 | 0.08 | 0.1  |
| chr11 | 115158581 | 115159002 | Fads6         | ENSMUSG00000044788 | 37   | 0.09 | 0.2  | 0.11 | 0.26 | 0.14 | 0.15 |

|       |           |           |               |                     |       |      |      |      |      |      |      |
|-------|-----------|-----------|---------------|---------------------|-------|------|------|------|------|------|------|
| chr11 | 118769823 | 118771101 | Rbfox3        | ENSMUSG00000025576  | 402   | 0.14 | 0.16 | 0.14 | 0.15 | 0.13 | 0.16 |
| chr11 | 5640731   | 5641335   | Urgcp         | ENSMUSG00000049680  | 116   | 0.08 | 0.17 | 0.09 | 0.08 | 0.1  | 0.09 |
| chr11 | 59263371  | 59264193  | Snap47        | ENSMUSG00000009894  | -367  | 0.17 | 0.15 | 0.15 | 0.17 | 0.15 | 0.16 |
| chr11 | 59859642  | 59860033  | Pemt          | ENSMUSG00000000301  | 142   | 0.08 | 0.18 | 0.1  | 0.13 | 0.1  | 0.1  |
| chr11 | 69137098  | 69137510  | Cntrob        | ENSMUSG000000032782 | -27   | 0.2  | NA   | 0.19 | NA   | 1    | 0.3  |
| chr11 | 75323705  | 75324310  | Rilp          | ENSMUSG000000038195 | 38    | 0.57 | NA   | 0.13 | 0.36 | 0.67 | 0.28 |
| chr11 | 83116097  | 83116780  | Ap2b1         | ENSMUSG000000035152 | 233   | 0.1  | 0.07 | 0.11 | 0.1  | 0.07 | 0.14 |
| chr11 | 94182713  | 94183458  | Luc7l3        | ENSMUSG00000020863  | 124   | 0.1  | 0.13 | 0.13 | 0.17 | 0.09 | 0.19 |
| chr11 | 121563528 | 121564304 | Metrl         | ENSMUSG000000039208 | 191   | 0.17 | 0.22 | 0.09 | 0.13 | 0.15 | 0.13 |
| chr11 | 23979023  | 23979963  | Bcl11a        | ENSMUSG00000000861  | -1177 | 0.08 | 0.2  | 0.23 | 0.13 | 0.12 | 0.17 |
| chr11 | 58751889  | 58752251  | Rnf187        | ENSMUSG000000020496 | 348   | 0.11 | 0.23 | 0.11 | 0.12 | 0.08 | 0.13 |
| chr11 | 30654898  | 30655478  | Gm12101       | ENSMUSG000000083990 | -227  | 0.1  | 0.06 | 0.12 | 0.11 | 0.12 | 0.07 |
| chr11 | 88860548  | 88861316  | Trim25        | ENSMUSG00000000275  | 242   | 0.16 | 0.62 | 0.6  | 0.35 | 0.13 | 0.24 |
| chr11 | 45757812  | 45758627  | Lsm11         | ENSMUSG000000044847 | 218   | 0.14 | 0.15 | 0.11 | 0.15 | 0.15 | 0.13 |
| chr11 | 45979696  | 45980103  | Nipal4        | ENSMUSG000000020411 | 111   | 0.2  | 0.07 | 0.12 | 0.18 | 0.12 | 0.3  |
| chr11 | 53583398  | 53584159  | Irf1          | ENSMUSG000000018899 | 262   | 0.08 | 0.18 | 0.11 | 0.16 | 0.09 | 0.18 |
| chr11 | 69494903  | 69495649  | Senp3         | ENSMUSG000000005204 | 72    | 0.06 | 0.06 | 0.09 | 0.17 | 0.08 | 0.15 |
| chr11 | 69804974  | 69805350  | Gabarap       | ENSMUSG000000018567 | 21    | 0.12 | 0.1  | 0.13 | 0.26 | 0.14 | 0.19 |
| chr11 | 96064577  | 96065034  | Gm11538       | ENSMUSG000000085983 | 37    | 0.11 | 0.5  | 0.17 | 0.14 | 0.14 | 0.17 |
| chr11 | 103224451 | 103224725 | Gm11641       | ENSMUSG000000085733 | 61    | 0.17 | 0.16 | 0.19 | 0.24 | 0.19 | 0.14 |
| chr11 | 11015681  | 11016520  | Vwc2          | ENSMUSG000000050830 | 243   | 0.11 | 0.21 | 0.12 | 0.18 | 0.12 | 0.11 |
| chr11 | 50138771  | 50139492  | Canx          | ENSMUSG000000020368 | 44    | 0.11 | 0.14 | 0.1  | 0.15 | 0.09 | 0.13 |
| chr11 | 102177974 | 102180917 | Ubtf          | ENSMUSG000000020923 | -1456 | 0.1  | 0.13 | 0.12 | 0.14 | 0.1  | 0.15 |
| chr11 | 6525743   | 6526397   | Tbrg4         | ENSMUSG000000000384 | -45   | 0.12 | 0.13 | 0.09 | 0.17 | 0.14 | 0.15 |
| chr11 | 53520214  | 53520913  | Rad50         | ENSMUSG000000020380 | 234   | 0.3  | 0.27 | 0.1  | 0.21 | 0.33 | 0.14 |
| chr11 | 54769245  | 54769806  | Tnip1         | ENSMUSG000000020400 | 22    | 0.1  | 0.14 | 0.1  | 0.18 | 0.09 | 0.15 |
| chr11 | 69748841  | 69749939  | Ybx2          | ENSMUSG000000018554 | 92    | 0.08 | 0.17 | 0.1  | 0.17 | 0.1  | 0.13 |
| chr11 | 72020214  | 72021171  | 4933427D14Rik | ENSMUSG000000020807 | 30    | 0.15 | 0.21 | 0.11 | 0.18 | 0.18 | 0.12 |
| chr11 | 102962617 | 102963110 | Plcd3         | ENSMUSG000000020937 | 42    | 0.14 | 0.1  | 0.12 | 0.22 | 0.11 | 0.12 |
| chr11 | 120049363 | 120049721 | 2810410L24Rik | ENSMUSG000000075389 | 523   | 0.48 | 0.61 | 0.22 | 0.33 | 0.25 | 0.2  |

|       |           |           |               |                    |       |      |      |      |      |      |      |
|-------|-----------|-----------|---------------|--------------------|-------|------|------|------|------|------|------|
| chr11 | 120645072 | 120646132 | Rfng          | ENSMUSG00000025158 | -103  | 0.14 | 0.12 | 0.09 | 0.14 | 0.13 | 0.13 |
| chr11 | 3674667   | 3675011   | Osbp2         | ENSMUSG00000020435 | -104  | 0.28 | 0.13 | 0.11 | 0.13 | 0.26 | 0.18 |
| chr11 | 55283139  | 55283664  | G3bp1         | ENSMUSG00000018583 | 214   | 0.06 | 0.1  | 0.08 | 0.1  | 0.08 | 0.11 |
| chr11 | 59040899  | 59042038  | Arf1          | ENSMUSG00000048076 | 196   | 0.08 | 0.11 | 0.1  | 0.12 | 0.07 | 0.14 |
| chr11 | 61667576  | 61668892  | Ulk2          | ENSMUSG00000004798 | -230  | 0.11 | 0.13 | 0.1  | 0.13 | 0.11 | 0.15 |
| chr11 | 62416124  | 62416673  | 2410006H16Rik | ENSMUSG00000086841 | 19    | 0.12 | 0.06 | 0.08 | 0.2  | 0.07 | 0.32 |
| chr11 | 69418448  | 69419349  | Atp1b2        | ENSMUSG00000041329 | 433   | 0.22 | 0.4  | 0.11 | 0.29 | 0.16 | 0.16 |
| chr11 | 83664653  | 83664959  | Hnf1b         | ENSMUSG00000020679 | 430   | 0.1  | 0.16 | 0.14 | 0.15 | 0.12 | 0.13 |
| chr11 | 94538284  | 94538895  | Xyll2         | ENSMUSG00000020868 | 132   | 0.09 | 0.16 | 0.08 | 0.12 | 0.1  | 0.09 |
| chr11 | 95720077  | 95721157  | 4833417C18Rik | ENSMUSG00000086015 | 438   | 0.14 | 0.19 | 0.13 | 0.23 | 0.17 | 0.22 |
| chr11 | 117829192 | 117830879 | Socs3         | ENSMUSG00000053113 | 465   | 0.14 | 0.16 | 0.1  | 0.15 | 0.12 | 0.19 |
| chr11 | 69734027  | 69735297  | Eif5a         | ENSMUSG00000078812 | -530  | 0.11 | 0.12 | 0.1  | 0.15 | 0.12 | 0.11 |
| chr11 | 87860691  | 87862155  | 2010015M23Rik | ENSMUSG00000091914 | -561  | 0.23 | 0.24 | 0.11 | 0.14 | 0.24 | 0.16 |
| chr11 | 96130902  | 96131128  | Hoxb9         | ENSMUSG00000020875 | -1756 | 0.06 | 0.13 | 0.12 | 0.16 | 0.11 | 0.25 |
| chr11 | 96638738  | 96639144  | Snx11         | ENSMUSG00000020876 | -135  | 0.05 | 0.09 | 0.1  | 0.13 | 0.08 | 0.12 |
| chr11 | 98209697  | 98210513  | Ppp1r1b       | ENSMUSG00000061718 | 387   | 0.1  | 0.16 | 0.12 | 0.22 | 0.09 | 0.17 |
| chr11 | 119352310 | 119353310 | A730011L01Rik | ENSMUSG00000039850 | 149   | 0.31 | 0.24 | 0.12 | 0.14 | 0.27 | 0.13 |
| chr11 | 120793926 | 120794308 | Ccdc57        | ENSMUSG00000048445 | 69    | 0.06 | 1    | 0.11 | 0.18 | 0.1  | 0.13 |
| chr11 | 78156883  | 78157350  | Unc119        | ENSMUSG0000002058  | 132   | 0.08 | 0.1  | 0.18 | 0.14 | 0.1  | 0.14 |
| chr11 | 95245736  | 95246368  | Slc35b1       | ENSMUSG00000020873 | 46    | 0.17 | 0.1  | 0.16 | 0.13 | 0.32 | 0.19 |
| chr11 | 106133764 | 106134727 | Smarcd2       | ENSMUSG00000078619 | 34    | 0.09 | 0.09 | 0.07 | 0.17 | 0.08 | 0.13 |
| chr11 | 106362173 | 106362726 | Snord104      | ENSMUSG00000065126 | 142   | 0.12 | 0.08 | 0.1  | 0.18 | 0.15 | 0.16 |
| chr11 | 50105136  | 50106120  | Maml1         | ENSMUSG00000050567 | -322  | 0.1  | 0.17 | 0.14 | 0.15 | 0.1  | 0.15 |
| chr11 | 98010397  | 98011961  | Fbxl20        | ENSMUSG00000020883 | -259  | 0.12 | 0.17 | 0.1  | 0.13 | 0.11 | 0.14 |
| chr11 | 101017155 | 101017507 | Tubg2         | ENSMUSG00000045007 | 110   | 0.11 | 0.13 | 0.08 | 0.09 | 0.09 | 0.12 |
| chr11 | 3189168   | 3191064   | Patz1         | ENSMUSG00000020453 | 946   | 0.13 | 0.18 | 0.1  | 0.2  | 0.14 | 0.14 |
| chr11 | 48650892  | 48651532  | Trim7         | ENSMUSG00000040350 | 245   | 0.09 | 0.11 | 0.1  | 0.13 | 0.08 | 0.14 |
| chr11 | 51433252  | 51433610  | Nhp2          | ENSMUSG00000001056 | 158   | 0.1  | 0.1  | 0.11 | 0.12 | 0.07 | 0.21 |
| chr11 | 51449117  | 51449549  | Rmnd5b        | ENSMUSG00000001054 | -184  | 0.15 | 0.18 | 0.11 | 0.17 | 0.16 | 0.15 |
| chr11 | 58120533  | 58121181  | Zfp692        | ENSMUSG00000037243 | 286   | 0.42 | 0.45 | 0.14 | 0.13 | 0.47 | 0.24 |

|       |           |           |         |                    |      |      |      |      |      |      |      |
|-------|-----------|-----------|---------|--------------------|------|------|------|------|------|------|------|
| chr11 | 98820918  | 98821426  | Rara    | ENSMUSG00000037992 | -554 | 0.18 | 0.16 | 0.11 | 0.2  | 0.27 | 0.2  |
| chr11 | 115183145 | 115183361 | Ush1g   | ENSMUSG00000045288 | 102  | 0.33 | 0.31 | 0.21 | 0.3  | 0.3  | 0.39 |
| chr11 | 115195916 | 115196206 | Otop3   | ENSMUSG00000018862 | 16   | 0.12 | 0.15 | 0.15 | 0.15 | 0.07 | 0.15 |
| chr11 | 119775017 | 119775421 | Chmp6   | ENSMUSG00000025371 | 95   | 0.08 | 0.07 | 0.06 | 0.17 | 0.09 | 0.1  |
| chr11 | 6344024   | 6344765   | H2afv   | ENSMUSG00000041126 | -39  | 0.06 | 0.1  | 0.09 | 0.15 | 0.07 | 0.11 |
| chr11 | 44283613  | 44284313  | Ublcp1  | ENSMUSG00000041231 | 37   | 0.12 | 0.13 | 0.16 | 0.2  | 0.11 | 0.13 |
| chr11 | 69208701  | 69209722  | Cyb5d1  | ENSMUSG00000044795 | -376 | 0.11 | 0.09 | 0.1  | 0.13 | 0.06 | 0.11 |
| chr11 | 77306530  | 77306838  | Git1    | ENSMUSG00000011877 | -380 | 1    | 0.33 | 1    | 1    | 0.37 | 0.29 |
| chr11 | 82744734  | 82745624  | Gm12575 | ENSMUSG00000086058 | 1705 | 0.1  | 0.07 | 0.11 | 0.14 | 0.1  | 0.11 |
| chr11 | 45869521  | 45869852  | Adam19  | ENSMUSG00000011256 | 126  | 0.1  | 0.08 | 0.07 | 0.11 | 0.09 | 0.11 |
| chr11 | 93857622  | 93858041  | Spag9   | ENSMUSG00000020859 | 414  | 0.13 | 0.42 | 0.11 | 0.17 | 0.15 | 0.16 |
| chr11 | 100180981 | 100181845 | Eif1    | ENSMUSG00000035530 | 214  | 0.34 | 0.25 | 0.12 | 0.28 | 0.37 | 0.25 |
| chr11 | 102679805 | 102680972 | Gjc1    | ENSMUSG00000034520 | 105  | 0.14 | 0.15 | 0.1  | 0.21 | 0.15 | 0.15 |
| chr11 | 120328485 | 120329326 | Arl16   | ENSMUSG00000057594 | -317 | 0.14 | 0.09 | 0.1  | 0.16 | 0.13 | 0.12 |
| chr11 | 40505831  | 40506249  | Mat2b   | ENSMUSG00000042032 | 83   | 0.24 | 0.15 | 0.11 | 0.11 | 0.28 | 0.14 |
| chr11 | 58453976  | 58454264  | Trim58  | ENSMUSG00000037124 | 153  | 0.12 | 0.1  | 0.12 | NA   | 0.25 | 0.18 |
| chr11 | 59005116  | 59005636  | Guk1    | ENSMUSG00000020444 | -62  | 0.05 | 0.08 | 0.09 | 0.16 | 0.06 | 0.1  |
| chr11 | 69813907  | 69814491  | Dvl2    | ENSMUSG00000020888 | 102  | 0.38 | 0.25 | 0.13 | 0.15 | 0.49 | 0.33 |
| chr11 | 77029506  | 77030194  | Ssh2    | ENSMUSG00000037926 | 61   | 0.12 | 0.07 | 0.1  | 0.08 | 0.1  | 0.1  |
| chr11 | 77161602  | 77162166  | Ssh2    | ENSMUSG00000037926 | 100  | 0.21 | 0.45 | 0.13 | 0.23 | 0.19 | 0.19 |
| chr11 | 85699769  | 85700105  | Tbx4    | ENSMUSG00000000094 | 13   | 0.43 | 0.56 | 0.39 | 0.52 | 0.38 | 0.32 |
| chr11 | 106348432 | 106349226 | Ern1    | ENSMUSG00000020715 | 281  | 0.14 | 0.18 | 0.09 | 0.16 | 0.15 | 0.15 |
| chr11 | 121065694 | 121066241 | Hexdc   | ENSMUSG00000039307 | 220  | 0.11 | 0.08 | 0.13 | 0.15 | 0.1  | 0.19 |
| chr11 | 30853846  | 30854096  | Erlec1  | ENSMUSG00000020311 | 151  | 0.13 | 0.05 | 0.07 | 0.13 | 0.11 | 0.13 |
| chr11 | 54846752  | 54847009  | Anxa6   | ENSMUSG00000018340 | 37   | 0.39 | 0.31 | 0.41 | 0.34 | 1    | 0.24 |
| chr11 | 60541754  | 60542164  | Smcr7   | ENSMUSG00000018599 | 59   | 0.13 | 0.32 | 0.12 | 0.16 | 0.16 | 0.14 |
| chr11 | 69392521  | 69392851  | Wrap53  | ENSMUSG00000041346 | 140  | 0.1  | 0.1  | 0.1  | 0.21 | 0.08 | 0.1  |
| chr11 | 76250457  | 76250715  | Abr     | ENSMUSG00000017631 | 136  | 0.13 | 0.24 | 0.1  | 0.16 | 0.11 | 0.15 |
| chr11 | 87881347  | 87882802  | Vezf1   | ENSMUSG00000018377 | 293  | 0.19 | 0.21 | 0.11 | 0.12 | 0.18 | 0.16 |
| chr11 | 97048442  | 97049925  | Kpnb1   | ENSMUSG0000001440  | 12   | 0.14 | 0.19 | 0.11 | 0.2  | 0.14 | 0.15 |

|       |           |           |               |                     |       |      |      |      |      |      |      |
|-------|-----------|-----------|---------------|---------------------|-------|------|------|------|------|------|------|
| chr11 | 102417078 | 102417773 | Gpatch8       | ENSMUSG00000034621  | 65    | 0.1  | 0.1  | 0.11 | 0.14 | 0.11 | 0.18 |
| chr11 | 102878175 | 102878556 | Dcakd         | ENSMUSG00000020935  | 117   | 0.22 | 0.22 | 0.11 | 0.27 | 0.21 | 0.14 |
| chr11 | 59918380  | 59919970  | Rai1          | ENSMUSG00000062115  | 660   | 0.16 | 0.11 | 0.1  | 0.12 | 0.16 | 0.13 |
| chr11 | 72861169  | 72861898  | 1200014J11Rik | ENSMUSG00000020783  | 248   | 0.08 | 0.11 | 0.09 | 0.17 | 0.08 | 0.13 |
| chr11 | 78279160  | 78279610  | Slc46a1       | ENSMUSG00000020829  | 186   | 0.17 | 0.57 | 0.06 | 0.2  | 0.13 | 0.06 |
| chr11 | 82594517  | 82595179  | Gm11423       | ENSMUSG00000085175  | -304  | 0.11 | 0.09 | 0.08 | 0.13 | 0.1  | 0.15 |
| chr11 | 101798750 | 101798962 | Rpl27-ps2     | ENSMUSG00000082171  | -1959 | 0.15 | 0.55 | 0.12 | 0.24 | 0.18 | 0.16 |
| chr11 | 102269660 | 102269887 | Slc25a39      | ENSMUSG00000018677  | -513  | 0.05 | 0.07 | 0.08 | 0.09 | 0.08 | 0.11 |
| chr11 | 109333567 | 109333919 | Slc16a6       | ENSMUSG00000041920  | 259   | 0.08 | 0.09 | 0.1  | 0.08 | 0.09 | 0.17 |
| chr11 | 112645813 | 112646779 | Sox9          | ENSMUSG00000000567  | 254   | 0.2  | 0.09 | 0.1  | 0.16 | 0.19 | 0.16 |
| chr11 | 115569891 | 115570118 | Grb2          | ENSMUSG000000059923 | -93   | 0.12 | 0.07 | 0.14 | 0.13 | 0.07 | 0.12 |
| chr11 | 40547150  | 40547645  | Nudcd2        | ENSMUSG00000020328  | 228   | 0.15 | 0.06 | 0.12 | 0.2  | 0.11 | 0.2  |
| chr11 | 83222896  | 83223604  | Ras10b        | ENSMUSG00000020684  | 60    | 0.09 | 0.14 | 0.09 | 0.14 | 0.09 | 0.11 |
| chr11 | 97744909  | 97745736  | Fbxo47        | ENSMUSG00000070336  | 146   | 0.15 | 0.43 | 0.1  | 0.13 | 0.2  | 0.2  |
| chr11 | 100948502 | 100948934 | Mix           | ENSMUSG00000017801  | 127   | 0.17 | 0.23 | 0.15 | 0.15 | 0.16 | 0.12 |
| chr11 | 101845717 | 101846283 | Dusp3         | ENSMUSG00000003518  | 65    | 0.22 | 0.14 | 0.12 | 0.15 | 0.25 | 0.18 |
| chr11 | 115489495 | 115489756 | Slc25a19      | ENSMUSG00000020744  | -30   | 0.2  | 0.2  | 0.18 | 0.4  | 0.14 | 0.23 |
| chr11 | 116703787 | 116705162 | Jmjd6         | ENSMUSG000000056962 | -455  | 0.14 | 0.08 | 0.09 | 0.17 | 0.15 | 0.1  |
| chr11 | 60745010  | 60745864  | Gm16516       | ENSMUSG00000042549  | -68   | 0.08 | 0.18 | 0.13 | 0.13 | 0.06 | 0.16 |
| chr11 | 68872795  | 68874352  | 2310047M10Rik | ENSMUSG00000045176  | 296   | 0.12 | 0.15 | 0.12 | 0.12 | 0.13 | 0.17 |
| chr11 | 97276685  | 97277421  | Arhgap23      | ENSMUSG00000049807  | 206   | 0.17 | 0.24 | 0.15 | 0.3  | 0.18 | 0.18 |
| chr11 | 117670976 | 117671474 | Syngn2        | ENSMUSG00000048277  | 243   | 0.1  | 0.13 | 0.08 | 0.14 | 0.12 | 0.09 |
| chr11 | 20640860  | 20641951  | Aftph         | ENSMUSG00000049659  | 53    | 0.1  | 0.21 | 0.11 | 0.18 | 0.11 | 0.12 |
| chr11 | 59661477  | 59661909  | Nt5m          | ENSMUSG000000032615 | 118   | 0.07 | 0.06 | 0.08 | 0.12 | 0.07 | 0.08 |
| chr11 | 68935650  | 68936604  | 9130213A22Rik | ENSMUSG00000090920  | -36   | 0.07 | 0.08 | 0.08 | 0.13 | 0.08 | 0.11 |
| chr11 | 97141096  | 97141839  | Gm11592       | ENSMUSG000000086680 | 25    | 0.15 | 0.1  | 0.08 | 0.12 | 0.14 | 0.11 |
| chr11 | 3102285   | 3103196   | Eif4enif1     | ENSMUSG00000020454  | 345   | 0.08 | 0.1  | 0.09 | 0.1  | 0.09 | 0.14 |
| chr11 | 4060222   | 4060620   | Ccdc157       | ENSMUSG000000051427 | -166  | 0.04 | 0.09 | 0.14 | 0.12 | 0.06 | 0.12 |
| chr11 | 4748799   | 4749790   | Nf2           | ENSMUSG00000009073  | -306  | 0.07 | 0.3  | 0.11 | 0.21 | 0.08 | 0.18 |
| chr11 | 33743429  | 33743784  | Kcnip1        | ENSMUSG000000053519 | -145  | 0.15 | 0.07 | 0.11 | 0.18 | 0.18 | 0.19 |



|       |           |           |               |                     |       |      |      |      |      |      |      |
|-------|-----------|-----------|---------------|---------------------|-------|------|------|------|------|------|------|
| chr11 | 75469166  | 75469867  | Myo1c         | ENSMUSG00000017774  | 141   | 0.11 | 0.16 | 0.1  | 0.23 | 0.12 | 0.15 |
| chr11 | 77580111  | 77580338  | Myo18a        | ENSMUSG00000000631  | -14   | 0.1  | 0.11 | 0.24 | 0.28 | 0.13 | 0.17 |
| chr11 | 115675882 | 115676576 | Tsen54        | ENSMUSG000000020781 | 191   | 0.09 | 0.21 | 0.08 | 0.13 | 0.1  | 0.14 |
| chr11 | 51463914  | 51464641  | N4bp3         | ENSMUSG00000001053  | 45    | 0.1  | 0.16 | 0.09 | 0.13 | 0.11 | 0.13 |
| chr11 | 59475649  | 59476518  | Mprip         | ENSMUSG000000005417 | 86    | 0.14 | 0.22 | 0.07 | 0.13 | 0.13 | 0.09 |
| chr11 | 63892761  | 63893190  | Cox10         | ENSMUSG000000042148 | -7    | 0.12 | 0.25 | 0.11 | 0.17 | 0.09 | 0.16 |
| chr11 | 68665995  | 68666785  | Ndel1         | ENSMUSG000000018736 | 153   | 0.2  | 0.32 | 0.19 | 0.26 | 0.22 | 0.18 |
| chr11 | 85048013  | 85048776  | D630032N06Rik | ENSMUSG000000048248 | 117   | 0.09 | 0.17 | 0.13 | 0.15 | 0.08 | 0.14 |
| chr11 | 87577583  | 87578341  | Bzrap1        | ENSMUSG000000034156 | -271  | 0.08 | 0.13 | 0.15 | 0.19 | 0.09 | 0.09 |
| chr11 | 20232040  | 20233107  | Slc1a4        | ENSMUSG000000020142 | 114   | 0.14 | 0.22 | 0.11 | 0.19 | 0.24 | 0.23 |
| chr11 | 60590290  | 60591269  | Top3a         | ENSMUSG000000002814 | -13   | 0.6  | 1    | 0.16 | 0.1  | 0.5  | 0.11 |
| chr11 | 68200552  | 68200796  | Ntn1          | ENSMUSG000000020902 | -160  | 0.08 | 0.1  | 0.11 | 0.19 | 0.07 | 0.11 |
| chr11 | 101526796 | 101527165 | Arl4d         | ENSMUSG000000034936 | 125   | 0.26 | 0.11 | 0.09 | 0.12 | 0.22 | 0.13 |
| chr11 | 59015790  | 59016302  | 2610507I01Rik | ENSMUSG000000085882 | -159  | 0.11 | 0.19 | 0.12 | 0.23 | 0.14 | 0.15 |
| chr11 | 61743288  | 61743949  | Akap10        | ENSMUSG000000047804 | 91    | 0.11 | 0.11 | 0.09 | 0.14 | 0.11 | 0.13 |
| chr11 | 67268459  | 67269474  | Gas7          | ENSMUSG000000033066 | 27    | 0.14 | 0.16 | 0.13 | 0.13 | 0.14 | 0.15 |
| chr11 | 76220607  | 76220875  | Timm22        | ENSMUSG000000020843 | 96    | 0.14 | 0.09 | 0.09 | 0.11 | 0.05 | 0.18 |
| chr11 | 88017662  | 88018105  | Mtps23        | ENSMUSG000000023723 | -7    | 0.13 | 0.15 | 0.11 | 0.21 | 0.12 | 0.16 |
| chr11 | 96166219  | 96166538  | 0610040B09Rik | ENSMUSG000000085645 | 17    | 0.14 | 0.2  | 0.28 | 0.24 | 0.15 | 0.16 |
| chr11 | 97436348  | 97436769  | Srcin1        | ENSMUSG000000038453 | -118  | 0.08 | 0.1  | 0.09 | 0.12 | 0.09 | 0.15 |
| chr11 | 97883258  | 97884119  | Cacnb1        | ENSMUSG000000020882 | 249   | 0.13 | 0.13 | 0.09 | 0.14 | 0.12 | 0.15 |
| chr11 | 114529860 | 114530434 | Rpl38         | ENSMUSG000000057322 | 285   | 0.13 | 0.42 | 0.14 | 0.19 | 0.12 | 0.18 |
| chr11 | 68884208  | 68884564  | Tmem107       | ENSMUSG000000020895 | 78    | 0.5  | 0.18 | 0.2  | 0.38 | 0.21 | 0.16 |
| chr11 | 102622684 | 102623224 | Adam11        | ENSMUSG000000020926 | 201   | 0.17 | 0.23 | 0.09 | 0.19 | 0.18 | 0.15 |
| chr11 | 30671621  | 30672484  | Psme4         | ENSMUSG000000040850 | 326   | 0.13 | 0.19 | 0.09 | 0.17 | 0.12 | 0.13 |
| chr11 | 31770662  | 31771460  | Cpeb4         | ENSMUSG000000020300 | -1150 | 0.1  | 0.28 | 0.12 | 0.3  | 0.09 | 0.19 |
| chr11 | 87391875  | 87392197  | 4-Sep         | ENSMUSG000000020486 | 133   | 0.09 | 0.06 | 0.1  | 0.11 | 0.07 | 0.13 |
| chr11 | 100388519 | 100389286 | Acly          | ENSMUSG000000020917 | 281   | 0.13 | 0.12 | 0.11 | 0.13 | 0.11 | 0.2  |
| chr11 | 107340713 | 107341177 | Psmd12        | ENSMUSG000000020720 | 147   | 0.27 | 0.6  | 0.19 | 0.2  | 0.29 | 0.12 |
| chr11 | 116515536 | 116515747 | Cygb          | ENSMUSG000000020810 | -14   | 0.08 | 0.07 | 0.09 | 0.18 | 0.09 | 0.18 |

|       |           |           |               |                     |       |      |      |      |      |      |      |
|-------|-----------|-----------|---------------|---------------------|-------|------|------|------|------|------|------|
| chr11 | 68714916  | 68715400  | Rpl26         | ENSMUSG00000060938  | 73    | 0.5  | 0.79 | 0.16 | 0.28 | 0.44 | 0.19 |
| chr11 | 78115000  | 78115361  | Spag5         | ENSMUSG0000002055   | 149   | 0.39 | 0.64 | 0.15 | 0.26 | 0.37 | 0.13 |
| chr11 | 86899875  | 86900296  | 1200011M11Rik | ENSMUSG00000020495  | 191   | 0.14 | 0.33 | 0.25 | 0.3  | 0.13 | 0.17 |
| chr11 | 112645131 | 112645390 | Sox9          | ENSMUSG0000000567   | -782  | 0.5  | 1    | 0.3  | 0.27 | 0.4  | 0.29 |
| chr11 | 4166615   | 4167109   | Lif           | ENSMUSG00000034394  | 63    | 0.21 | 0.28 | 0.16 | 0.29 | 0.2  | 0.16 |
| chr11 | 70353613  | 70354009  | Pld2          | ENSMUSG00000020828  | 3     | 0.22 | 0.28 | 0.16 | 0.15 | 0.24 | 0.24 |
| chr11 | 98635119  | 98635440  | Nr1d1         | ENSMUSG00000020889  | 1274  | 0.13 | 0.13 | 0.08 | 0.12 | 0.12 | 0.16 |
| chr11 | 100830471 | 100831986 | Ptrf          | ENSMUSG0000004044   | 637   | 0.12 | 0.11 | 0.11 | 0.16 | 0.13 | 0.17 |
| chr11 | 23794646  | 23795356  | Pap0lg        | ENSMUSG00000020273  | 235   | 0.21 | 0.2  | 0.13 | 0.24 | 0.24 | 0.17 |
| chr11 | 50415201  | 50417039  | Adams2        | ENSMUSG00000036545  | 534   | 0.13 | 0.12 | 0.09 | 0.14 | 0.13 | 0.12 |
| chr11 | 70042477  | 70042959  | Bcl6b         | ENSMUSG00000000317  | 461   | 0.98 | 0.98 | 0.56 | 0.52 | 0.95 | 0.57 |
| chr11 | 72774577  | 72775098  | Atp2a3        | ENSMUSG00000020788  | 166   | 0.19 | 0.12 | 0.11 | 0.2  | 0.18 | 0.14 |
| chr11 | 74983761  | 74984117  | Hic1          | ENSMUSG00000043099  | -918  | 0.11 | 0.14 | 0.1  | 0.19 | 0.06 | 0.13 |
| chr11 | 94462936  | 94463178  | Acsf2         | ENSMUSG00000076435  | 26    | 0.14 | 0.29 | 0.22 | 0.14 | 0.12 | 0.23 |
| chr11 | 94979537  | 94979802  | Dlx3          | ENSMUSG0000001510   | -1734 | 0.29 | 0.2  | 0.37 | 0.44 | 0.27 | 0.36 |
| chr11 | 97847512  | 97847887  | Plxdc1        | ENSMUSG00000017417  | 14    | 0.08 | 0.13 | 0.08 | 0.1  | 0.09 | 0.16 |
| chr11 | 100437670 | 100437932 | Cnp           | ENSMUSG00000006782  | 596   | 0.57 | 0.77 | 0.39 | NA   | 0.52 | 0.63 |
| chr11 | 106021102 | 106022011 | Limd2         | ENSMUSG00000040699  | -315  | 0.24 | 0.21 | 0.12 | 0.19 | 0.23 | 0.11 |
| chr11 | 115991872 | 115992515 | Trim65        | ENSMUSG00000054517  | 245   | 0.1  | 0.21 | 0.11 | 0.16 | 0.09 | 0.21 |
| chr11 | 120094648 | 120094956 | Bahcc1        | ENSMUSG00000039741  | 541   | 0.03 | 0.08 | 0.11 | 0.09 | 0.07 | 0.14 |
| chr11 | 79473917  | 79474571  | Rab11fip4     | ENSMUSG00000017639  | 180   | 0.12 | 0.13 | 0.13 | 0.18 | 0.12 | 0.15 |
| chr11 | 84338415  | 84339315  | 1500016L03Rik | ENSMUSG000000087211 | -297  | 0.06 | 0.07 | 0.11 | 0.21 | 0.06 | 0.08 |
| chr11 | 95275124  | 95275445  | Spop          | ENSMUSG00000057522  | -110  | 0.28 | 0.85 | 0.34 | 0.62 | 0.25 | 0.24 |
| chr11 | 32126389  | 32126811  | Mpg           | ENSMUSG00000020287  | 95    | 0.07 | 0.1  | 0.13 | 0.12 | 0.06 | 0.13 |
| chr11 | 69694512  | 69694933  | Kctd11        | ENSMUSG00000046731  | -235  | 0.08 | 0.14 | 0.12 | 0.17 | 0.09 | 0.17 |
| chr11 | 83567181  | 83567520  | Heatr6        | ENSMUSG00000000976  | 152   | 0.12 | 0.11 | 0.13 | 0.15 | 0.13 | 0.14 |
| chr11 | 101126462 | 101126756 | Wnk4          | ENSMUSG00000035112  | -13   | 0.17 | 0.09 | 0.13 | 0.2  | 0.16 | 0.11 |
| chr11 | 114536686 | 114537319 | Tyh2          | ENSMUSG00000034714  | 257   | 0.17 | 0.08 | 0.09 | 0.12 | 0.13 | 0.22 |
| chr11 | 3165992   | 3166689   | Drg1          | ENSMUSG00000020457  | 55    | 0.19 | 0.09 | 0.1  | 0.14 | 0.18 | 0.2  |
| chr11 | 3352182   | 3352686   | Rnf185        | ENSMUSG00000020448  | -97   | 0.13 | 0.1  | 0.12 | 0.15 | 0.13 | 0.13 |

|       |          |          |               |                     |       |      |      |      |      |      |      |
|-------|----------|----------|---------------|---------------------|-------|------|------|------|------|------|------|
| chr11 | 4086645  | 4087206  | Tbc1d10a      | ENSMUSG00000034412  | 133   | 0.06 | 0.12 | 0.09 | 0.14 | 0.12 | 0.13 |
| chr11 | 4998463  | 4999699  | Rhbdd3        | ENSMUSG00000034175  | 152   | 0.31 | 0.38 | 0.13 | 0.16 | 0.31 | 0.24 |
| chr11 | 5855548  | 5856096  | Ykt6          | ENSMUSG00000002741  | 126   | 0.12 | 0.19 | 0.11 | 0.11 | 0.11 | 0.12 |
| chr11 | 6174676  | 6175012  | Tmed4         | ENSMUSG00000004394  | 24    | 0.33 | 1    | 0.14 | 0.25 | 0.5  | 0.09 |
| chr11 | 11013911 | 11014585 | Vwc2          | ENSMUSG000000050830 | 22    | 0.12 | 0.08 | 0.09 | 0.24 | 0.13 | 0.1  |
| chr11 | 18920495 | 18920769 | Meis1         | ENSMUSG000000020160 | -1671 | 0.33 | 0.6  | 0.1  | 0.59 | 0.35 | 0.16 |
| chr11 | 20101021 | 20101924 | Rab1          | ENSMUSG000000020149 | 37    | 0.36 | 0.54 | 0.11 | 0.14 | 0.37 | 0.12 |
| chr11 | 20442502 | 20443773 | Sertad2       | ENSMUSG000000049800 | -119  | 0.09 | 0.21 | 0.12 | 0.08 | 0.1  | 0.15 |
| chr11 | 22881956 | 22882373 | Commd1        | ENSMUSG000000051355 | -74   | 0.08 | 0.14 | 0.06 | 0.2  | 0.07 | 0.09 |
| chr11 | 22967721 | 22968189 | Gm12059       | ENSMUSG000000085665 | -43   | 0.09 | 0.12 | 0.08 | 0.21 | 0.07 | 0.09 |
| chr11 | 29072125 | 29073524 | Smek2         | ENSMUSG000000020463 | -66   | 0.31 | 0.15 | 0.15 | 0.17 | 0.31 | 0.18 |
| chr11 | 29426389 | 29426598 | Mtif2         | ENSMUSG000000020459 | 85    | 0.17 | 0.12 | 0.15 | 0.09 | 0.08 | 0.06 |
| chr11 | 30098340 | 30098612 | Spnb2         | ENSMUSG000000020315 | -219  | 0.33 | 0.25 | 0.11 | 0.23 | 0.43 | 0.16 |
| chr11 | 40568409 | 40568895 | Ccng1         | ENSMUSG000000020326 | 161   | 0.15 | 0.13 | 0.14 | 0.17 | 0.16 | 0.15 |
| chr11 | 43649938 | 43650175 | Adra1b        | ENSMUSG000000050541 | -222  | 0.2  | 0.08 | 0.11 | 0.21 | 0.11 | 0.09 |
| chr11 | 48613815 | 48614265 | Gnb2l1        | ENSMUSG000000020372 | 206   | 0.75 | NA   | 0.16 | 0.17 | 1    | 0.17 |
| chr11 | 48630187 | 48631053 | Trim41        | ENSMUSG000000040365 | -165  | 0.09 | 0.12 | 0.08 | 0.17 | 0.09 | 0.11 |
| chr11 | 48982620 | 48983138 | Btnl9         | ENSMUSG000000040283 | 1298  | 0.11 | 0.15 | 0.11 | 0.24 | 0.1  | 0.15 |
| chr11 | 50048257 | 50048480 | Mgat4b        | ENSMUSG000000036620 | 843   | 0.85 | 0.88 | 0.85 | 0.81 | 0.85 | 0.93 |
| chr11 | 50640948 | 50641322 | Zfp354c       | ENSMUSG000000044807 | 53    | 0.17 | 0.41 | 0.16 | 0.3  | 0.19 | 0.13 |
| chr11 | 51076372 | 51077232 | BC049762      | ENSMUSG000000045942 | -349  | 0.08 | 0.12 | 0.11 | 0.18 | 0.07 | 0.13 |
| chr11 | 51502128 | 51502668 | 0610009B22Rik | ENSMUSG000000007777 | -243  | 0.13 | 0.29 | 0.13 | 0.18 | 0.13 | 0.16 |
| chr11 | 52209835 | 52210325 | 9530068E07Rik | ENSMUSG000000036275 | 150   | 0.08 | 0.1  | 0.07 | 0.1  | 0.07 | 0.12 |
| chr11 | 53704581 | 53705563 | Slc22a5       | ENSMUSG000000018900 | 25    | 0.1  | 0.13 | 0.11 | 0.14 | 0.1  | 0.13 |
| chr11 | 55017744 | 55018020 | Slc36a1       | ENSMUSG000000020261 | 30    | 0.1  | 0.2  | 0.09 | 0.18 | 0.1  | 0.24 |
| chr11 | 56272837 | 56273100 | Gm12241       | ENSMUSG000000081749 | 117   | 0.94 | 0.87 | 0.79 | 0.98 | 0.93 | 0.96 |
| chr11 | 57331737 | 57332375 | Fam114a2      | ENSMUSG000000020523 | 48    | 0.09 | 0.1  | 0.12 | 0.14 | 0.09 | 0.13 |
| chr11 | 57650467 | 57650757 | Gm11003       | ENSMUSG000000078855 | -654  | 0.27 | 0.5  | 0.14 | 0.2  | 0.31 | 0.25 |
| chr11 | 58136404 | 58136942 | 1700047K16Rik | ENSMUSG000000087347 | 183   | 0.09 | 0.09 | 0.11 | 0.12 | 0.1  | 0.14 |
| chr11 | 59285656 | 59285908 | Zfp867        | ENSMUSG000000054519 | 194   | 0.11 | 0.16 | 0.08 | 0.11 | 0.2  | 0.16 |

|       |          |          |               |                     |      |      |      |      |      |      |      |
|-------|----------|----------|---------------|---------------------|------|------|------|------|------|------|------|
| chr11 | 59777988 | 59778672 | Rasd1         | ENSMUSG00000049892  | 116  | 0.13 | 0.12 | 0.11 | 0.21 | 0.13 | 0.13 |
| chr11 | 59989203 | 59990818 | Rai1          | ENSMUSG00000062115  | 629  | 0.15 | 0.07 | 0.08 | 0.11 | 0.14 | 0.16 |
| chr11 | 60033823 | 60034142 | Srebf1        | ENSMUSG00000020538  | 124  | 0.11 | 0.3  | 0.1  | 0.17 | 0.11 | 0.16 |
| chr11 | 60230242 | 60231487 | Atpaf2        | ENSMUSG00000042709  | -344 | 0.16 | 0.2  | 0.14 | 0.22 | 0.16 | 0.15 |
| chr11 | 60267970 | 60268397 | Drg2          | ENSMUSG00000020537  | 90   | 0.1  | 0.05 | 0.19 | 0.12 | 0.09 | 0.18 |
| chr11 | 61191378 | 61191657 | Slc47a1       | ENSMUSG00000010122  | 49   | 0.12 | 0.17 | 0.08 | 0.11 | 0.14 | 0.13 |
| chr11 | 61307031 | 61307994 | Mapk7         | ENSMUSG00000001034  | -389 | 0.09 | 0.12 | 0.09 | 0.13 | 0.09 | 0.14 |
| chr11 | 62364414 | 62365321 | Gm12279       | ENSMUSG00000087120  | -324 | 0.23 | 0.08 | 0.15 | 0.25 | 0.19 | 0.19 |
| chr11 | 64792327 | 64792884 | Elac2         | ENSMUSG00000020549  | 65   | 0.07 | 0.07 | 0.09 | 0.17 | 0.07 | 0.17 |
| chr11 | 65083337 | 65083765 | Myocd         | ENSMUSG00000020542  | -195 | 0.33 | 0.5  | 0.17 | NA   | 0.5  | 0.19 |
| chr11 | 65981594 | 65982008 | Dnahc9        | ENSMUSG000000056752 | 145  | 0.27 | 0.24 | 0.13 | 0.22 | 0.25 | 0.26 |
| chr11 | 69394909 | 69395197 | Trp53         | ENSMUSG00000059552  | 1146 | 0.09 | 0.24 | 0.21 | 0.37 | 0.15 | 0.17 |
| chr11 | 69446277 | 69447068 | Fxr2          | ENSMUSG00000018765  | 180  | 0.18 | 0.46 | 0.12 | 0.16 | 0.18 | 0.2  |
| chr11 | 69650590 | 69651361 | Nlgn2         | ENSMUSG00000051790  | 311  | 0.14 | 0.16 | 0.09 | 0.16 | 0.14 | 0.17 |
| chr11 | 69761427 | 69761738 | Slc2a4        | ENSMUSG00000018566  | -106 | 0.07 | 0.06 | 0.15 | 0.09 | 0.07 | 0.13 |
| chr11 | 69794704 | 69795141 | Rai12         | ENSMUSG00000018565  | -168 | 0.1  | 0.24 | 0.12 | 0.24 | 0.12 | 0.33 |
| chr11 | 70043219 | 70043434 | Bcl6b         | ENSMUSG00000000317  | -85  | 0.31 | 0.05 | 0.09 | 0.15 | 0.25 | 0.19 |
| chr11 | 70460314 | 70460807 | Slc25a11      | ENSMUSG00000014606  | -159 | 0.38 | 0.23 | 0.14 | 0.16 | 0.33 | 0.14 |
| chr11 | 70482660 | 70483348 | Spag7         | ENSMUSG00000018287  | -284 | 0.09 | 0.17 | 0.14 | 0.1  | 0.08 | 0.14 |
| chr11 | 71948802 | 71949262 | Pitpnm3       | ENSMUSG00000040543  | 191  | 0.46 | 0.29 | 0.28 | 0.56 | 0.47 | 0.34 |
| chr11 | 72079701 | 72080822 | 1700051A21Rik | ENSMUSG00000086951  | 338  | 0.18 | 0.1  | 0.18 | 0.21 | 0.17 | 0.17 |
| chr11 | 72127890 | 72128134 | Fbxo39        | ENSMUSG00000070388  | 66   | 0.5  | NA   | 0.12 | NA   | 0.33 | 0.16 |
| chr11 | 72224633 | 72225396 | Smtnl2        | ENSMUSG00000045667  | 69   | 0.1  | 0.14 | 0.1  | 0.13 | 0.08 | 0.18 |
| chr11 | 72608925 | 72610350 | Cyb5d2        | ENSMUSG000000057778 | -296 | 0.09 | 0.14 | 0.08 | 0.12 | 0.09 | 0.16 |
| chr11 | 72832208 | 72833229 | 4732414G09Rik | ENSMUSG00000086943  | -375 | 0.11 | 0.12 | 0.11 | 0.17 | 0.11 | 0.12 |
| chr11 | 75464987 | 75465528 | Myo1c         | ENSMUSG00000017774  | 245  | 0.16 | 0.09 | 0.12 | 0.19 | 0.15 | 0.11 |
| chr11 | 76056893 | 76057457 | Glod4         | ENSMUSG00000017286  | -214 | 0.12 | 0.14 | 0.09 | 0.12 | 0.12 | 0.18 |
| chr11 | 77275760 | 77276301 | Coro6         | ENSMUSG00000020836  | 117  | 0.08 | 0.07 | 0.06 | 0.11 | 0.08 | 0.11 |
| chr11 | 77576554 | 77577138 | Myo18a        | ENSMUSG00000000631  | 98   | 0.11 | 0.18 | 0.13 | 0.11 | 0.11 | 0.14 |
| chr11 | 78059273 | 78059801 | Supt6h        | ENSMUSG00000002052  | -48  | 0.12 | NA   | 0.12 | 0.26 | 0.16 | 0.15 |

|       |          |          |          |                     |      |      |      |      |      |      |      |
|-------|----------|----------|----------|---------------------|------|------|------|------|------|------|------|
| chr11 | 78141804 | 78142327 | Pigs     | ENSMUSG00000041958  | 148  | 0.18 | 0.06 | 0.14 | 0.2  | 0.17 | 0.13 |
| chr11 | 78564867 | 78565297 | Fam58b   | ENSMUSG00000049489  | 149  | 0.12 | 0.11 | 0.1  | 0.18 | 0.11 | 0.11 |
| chr11 | 78959141 | 78960168 | Ksr1     | ENSMUSG00000018334  | 202  | 0.33 | 0.18 | 0.1  | 0.21 | 0.36 | 0.14 |
| chr11 | 79894268 | 79894555 | Crif3    | ENSMUSG00000017561  | 27   | 0.1  | 0.09 | 0.07 | 0.12 | 0.11 | 0.1  |
| chr11 | 80114349 | 80115264 | Rhbd13   | ENSMUSG00000017692  | 392  | 0.06 | 0.11 | 0.08 | 0.13 | 0.06 | 0.15 |
| chr11 | 80290022 | 80291558 | Cdk5r1   | ENSMUSG00000048895  | 242  | 0.11 | 0.13 | 0.11 | 0.16 | 0.11 | 0.12 |
| chr11 | 81782041 | 81782378 | Accn1    | ENSMUSG00000020704  | -250 | 0.06 | 0.11 | 0.08 | 0.26 | 0.06 | 0.13 |
| chr11 | 83665538 | 83665842 | Hnf1b    | ENSMUSG00000020679  | -54  | 0.22 | NA   | 0.12 | 0.17 | 0.2  | 0.15 |
| chr11 | 83777827 | 83778294 | Synrg    | ENSMUSG00000034940  | 130  | 0.13 | 0.12 | 0.11 | 0.14 | 0.11 | 0.13 |
| chr11 | 83881609 | 83882054 | Dusp14   | ENSMUSG00000018648  | 28   | 0.11 | 0.08 | 0.07 | 0.14 | 0.11 | 0.12 |
| chr11 | 83943318 | 83943334 | Acaca    | ENSMUSG00000020532  | 52   | 0.1  | 0.11 | 0.06 | 0.11 | 0.11 | 0.16 |
| chr11 | 84336180 | 84336400 | Lhx1     | ENSMUSG00000018698  | -77  | 0.09 | 0.22 | 0.1  | 0.12 | 0.1  | 0.1  |
| chr11 | 84632211 | 84633138 | Mrm1     | ENSMUSG00000018405  | -438 | 0.13 | 0.15 | 0.07 | 0.13 | 0.13 | 0.16 |
| chr11 | 84693282 | 84694013 | Myo19    | ENSMUSG00000020527  | -3   | 0.11 | 0.27 | 0.11 | 0.14 | 0.12 | 0.15 |
| chr11 | 86497139 | 86497650 | Vmp1     | ENSMUSG00000018171  | -71  | 0.25 | 0.09 | 0.13 | 0.2  | 0.3  | 0.13 |
| chr11 | 86570916 | 86571723 | Cltc     | ENSMUSG00000047126  | -325 | 0.2  | 0.16 | 0.1  | 0.19 | 0.24 | 0.15 |
| chr11 | 86806525 | 86807453 | Ypel2    | ENSMUSG00000018427  | 220  | 0.19 | 0.18 | 0.1  | 0.13 | 0.19 | 0.18 |
| chr11 | 94382569 | 94382871 | Mycbpap  | ENSMUSG00000039110  | 336  | 0.05 | 0.04 | 0.13 | 0.18 | 0.04 | 0.16 |
| chr11 | 94410172 | 94410602 | Rsad1    | ENSMUSG00000039096  | 126  | 0.09 | 0.11 | 0.11 | 0.13 | 0.06 | 0.19 |
| chr11 | 95685311 | 95686024 | Phospho1 | ENSMUSG00000050860  | -146 | 0.05 | 0.06 | 0.12 | 0.11 | 0.05 | 0.16 |
| chr11 | 95937108 | 95937358 | Atp5g1   | ENSMUSG00000006057  | -249 | 1    | NA   | 0.09 | 0.17 | 0.33 | 0.21 |
| chr11 | 96112849 | 96113347 | Gm53     | ENSMUSG000000078706 | 140  | 0.17 | 0.27 | 0.16 | 0.26 | 0.17 | 0.12 |
| chr11 | 96214258 | 96214803 | Hoxb3os  | ENSMUSG000000084844 | 1475 | 0.09 | 0.08 | 0.12 | 0.16 | 0.09 | 0.15 |
| chr11 | 96711200 | 96711739 | Mir152   | ENSMUSG000000065515 | -238 | 0.32 | 0.17 | 0.11 | 0.33 | 0.32 | 0.18 |
| chr11 | 97547015 | 97547319 | Cisd3    | ENSMUSG000000078695 | 27   | 0.08 | 0.09 | 0.07 | 0.09 | 0.08 | 0.19 |
| chr11 | 97660659 | 97661550 | Lasp1    | ENSMUSG000000038366 | 225  | 0.18 | 0.13 | 0.15 | 0.2  | 0.18 | 0.2  |
| chr11 | 98063925 | 98065040 | Cdk12    | ENSMUSG00000003119  | 109  | 0.22 | 0.46 | 0.1  | 0.14 | 0.23 | 0.2  |
| chr11 | 98406993 | 98407432 | Ikzf3    | ENSMUSG00000018168  | -98  | 0.21 | 0.17 | 0.39 | 0.13 | 0.15 | 0.13 |
| chr11 | 98448346 | 98448748 | Ormdl3   | ENSMUSG000000038150 | 135  | 0.14 | 0.22 | 0.11 | 0.07 | 0.15 | 0.12 |
| chr11 | 98603031 | 98603650 | Thra     | ENSMUSG000000058756 | 215  | 0.15 | 0.37 | 0.11 | 0.15 | 0.15 | 0.15 |

|       |           |           |               |                    |       |      |      |      |      |      |      |
|-------|-----------|-----------|---------------|--------------------|-------|------|------|------|------|------|------|
| chr11 | 98885243  | 98885496  | Top2a         | ENSMUSG00000020914 | 123   | 0.07 | 0.28 | 0.06 | 0.12 | 0.08 | 0.11 |
| chr11 | 98902325  | 98903129  | Igfbp4        | ENSMUSG00000017493 | 169   | 0.15 | 0.21 | 0.1  | 0.13 | 0.15 | 0.19 |
| chr11 | 100302060 | 100302456 | Nt5c3l        | ENSMUSG00000017176 | -28   | 0.07 | 0.08 | 0.15 | 0.12 | 0.09 | 0.1  |
| chr11 | 100436194 | 100436414 | Cnp           | ENSMUSG00000006782 | 86    | 0.29 | 0.48 | 0.07 | 0.13 | 0.26 | 0.14 |
| chr11 | 100870745 | 100870952 | Atp6v0a1      | ENSMUSG00000019302 | 82    | 0.06 | 0.07 | 0.1  | 0.13 | 0.06 | 0.22 |
| chr11 | 100980842 | 100981513 | Fam134c       | ENSMUSG00000017802 | -98   | 0.11 | 0.11 | 0.11 | 0.13 | 0.11 | 0.1  |
| chr11 | 101107541 | 101107996 | Ramp2         | ENSMUSG00000001240 | 142   | 0.14 | 0.11 | 0.09 | 0.16 | 0.14 | 0.14 |
| chr11 | 101114942 | 101115385 | Vps25         | ENSMUSG00000078656 | 142   | 0.27 | 0.34 | 0.16 | 0.15 | 0.29 | 0.14 |
| chr11 | 101278340 | 101278805 | Aarsd1        | ENSMUSG00000075528 | 124   | 0.07 | 0.35 | 0.08 | 0.14 | 0.08 | 0.11 |
| chr11 | 101594036 | 101594421 | Dhx8          | ENSMUSG00000034931 | -5    | 0.1  | 0.04 | 0.19 | 0.18 | 0.13 | 0.19 |
| chr11 | 101948492 | 101949049 | Mpp2          | ENSMUSG00000017314 | 999   | 0.1  | 0.16 | 0.14 | 0.19 | 0.09 | 0.15 |
| chr11 | 102110035 | 102110578 | BC030867      | ENSMUSG00000034773 | 110   | 0.15 | 0.1  | 0.15 | 0.2  | 0.16 | 0.11 |
| chr11 | 102328404 | 102328708 | Itga2b        | ENSMUSG00000034664 | -43   | 0.15 | NA   | 0.12 | 0.09 | 0.11 | 0.14 |
| chr11 | 103031916 | 103032816 | Fmn1          | ENSMUSG00000055805 | -55   | 0.09 | 0.08 | 0.08 | 0.13 | 0.09 | 0.13 |
| chr11 | 103128348 | 103129164 | Map3k14       | ENSMUSG00000020941 | -75   | 0.09 | 0.08 | 0.08 | 0.19 | 0.09 | 0.13 |
| chr11 | 105224301 | 105224568 | Gm11638       | ENSMUSG00000086487 | -132  | 0.1  | 0.2  | 0.1  | 0.27 | 0.11 | 0.14 |
| chr11 | 105451297 | 105451764 | Tanc2         | ENSMUSG00000053580 | 230   | 0.14 | 0.14 | 0.09 | 0.1  | 0.11 | 0.17 |
| chr11 | 106077409 | 106078679 | Ccdc47        | ENSMUSG00000078622 | -386  | 1    | 0.61 | 0.14 | 0.21 | 1    | 0.11 |
| chr11 | 106781407 | 106782269 | Smurf2        | ENSMUSG00000018363 | -249  | 0.16 | 0.51 | 0.11 | 0.13 | 0.16 | 0.12 |
| chr11 | 107050224 | 107050800 | Nol11         | ENSMUSG00000018433 | 154   | 0.18 | 0.19 | 0.12 | 0.21 | 0.18 | 0.2  |
| chr11 | 110198679 | 110199262 | Abca5         | ENSMUSG00000018800 | -34   | 0.13 | 0.15 | 0.07 | 0.19 | 0.14 | 0.15 |
| chr11 | 114647671 | 114647995 | Kif19a        | ENSMUSG00000010021 | -1384 | 0.15 | 0.18 | 0.24 | 0.36 | 0.16 | 0.18 |
| chr11 | 115015333 | 115015600 | Rab37         | ENSMUSG00000020732 | -5    | 0.06 | 0.12 | 0.13 | 0.18 | 0.07 | 0.13 |
| chr11 | 115048541 | 115048852 | Nat9          | ENSMUSG00000015542 | -120  | 0.17 | 0.33 | 0.09 | 0.13 | 0.15 | 0.14 |
| chr11 | 115126618 | 115126824 | Grin2c        | ENSMUSG00000020734 | 22    | 0.12 | 0.06 | 0.11 | 0.2  | 0.16 | 0.17 |
| chr11 | 115127921 | 115128583 | Grin2c        | ENSMUSG00000020734 | 305   | 0.12 | 0.15 | 0.12 | 0.19 | 0.12 | 0.15 |
| chr11 | 115184676 | 115185013 | Otop2         | ENSMUSG00000050201 | 605   | 1    | 1    | 0.25 | NA   | 1    | 0.36 |
| chr11 | 115626512 | 115627374 | 2310067B10Rik | ENSMUSG00000020747 | 196   | 0.07 | 0.12 | 0.09 | 0.16 | 0.07 | 0.18 |
| chr11 | 115873661 | 115874162 | Galk1         | ENSMUSG00000020766 | 122   | 0.29 | 0.21 | 0.17 | 0.24 | 0.29 | 0.3  |
| chr11 | 116144179 | 116144834 | Galr2         | ENSMUSG00000020793 | 1706  | 0.09 | 0.08 | 0.13 | 0.21 | 0.1  | 0.22 |

|       |           |           |               |                    |       |      |      |      |      |      |      |
|-------|-----------|-----------|---------------|--------------------|-------|------|------|------|------|------|------|
| chr11 | 117193472 | 117193997 | 9-Sep         | ENSMUSG00000059248 | 75    | 0.22 | 0.31 | 0.12 | 0.18 | 0.25 | 0.25 |
| chr11 | 117710351 | 117710869 | Birc5         | ENSMUSG00000017716 | 45    | 0.19 | 0.15 | 0.15 | 0.16 | 0.19 | 0.16 |
| chr11 | 119129194 | 119129635 | Gaa           | ENSMUSG00000025579 | 213   | 0.14 | 0.09 | 0.18 | 0.09 | 0.15 | 0.15 |
| chr11 | 120012037 | 120012836 | Slc38a10      | ENSMUSG00000061306 | 157   | 0.33 | NA   | 0.13 | 0.08 | 0.18 | 0.09 |
| chr11 | 120094098 | 120094307 | Bahcc1        | ENSMUSG00000039741 | -59   | 0.08 | 0.33 | 0.06 | 0.14 | 0.08 | 0.09 |
| chr11 | 120410696 | 120411249 | Fam195b       | ENSMUSG00000061111 | 43    | 0.17 | 0.17 | 0.15 | 0.13 | 0.16 | 0.09 |
| chr11 | 120582607 | 120583097 | Rac3          | ENSMUSG00000018012 | 68    | 0.06 | 0.07 | 0.06 | 0.12 | 0.06 | 0.09 |
| chr11 | 120588266 | 120588522 | Dcxr          | ENSMUSG00000039450 | 149   | 0.07 | 0.11 | 0.18 | 0.18 | 0.05 | 0.16 |
| chr11 | 120810262 | 120810968 | Slc16a3       | ENSMUSG00000025161 | 248   | 0.22 | 0.31 | 0.19 | 0.17 | 0.24 | 0.13 |
| chr11 | 120852080 | 120852722 | Csnk1d        | ENSMUSG00000025162 | -216  | 0.12 | 0.13 | 0.1  | 0.11 | 0.12 | 0.13 |
| chr11 | 3188699   | 3188940   | Patz1         | ENSMUSG00000020453 | -58   | NA   | 0.07 | 0.12 | 0.22 | 0.08 | 0.08 |
| chr11 | 3996557   | 3996908   | Mtfp1         | ENSMUSG00000004748 | -1284 | NA   | 0.75 | 0.11 | 0.36 | NA   | 0.18 |
| chr11 | 4018467   | 4018845   | Sec14l2       | ENSMUSG00000003585 | 43    | NA   | NA   | 0.33 | NA   | NA   | NA   |
| chr11 | 4959846   | 4960052   | Rasl10a       | ENSMUSG00000034209 | 980   | NA   | 1    | 0.1  | 0.2  | NA   | 0.25 |
| chr11 | 5802024   | 5802330   | Gck           | ENSMUSG00000041798 | -87   | NA   | 1    | 0.11 | 0.4  | NA   | 0.33 |
| chr11 | 6347284   | 6347512   | Gm11970       | ENSMUSG00000079988 | 1177  | NA   | NA   | 1    | 1    | 1    | NA   |
| chr11 | 6505466   | 6505771   | Nacad         | ENSMUSG00000041073 | 438   | NA   | 1    | 1    | NA   | 1    | 0.33 |
| chr11 | 6963698   | 6964253   | Adcy1         | ENSMUSG00000020431 | 483   | NA   | NA   | 0.18 | NA   | 0.11 | 0.16 |
| chr11 | 11361982  | 11362329  | 4930415F15Rik | ENSMUSG00000020191 | 58    | NA   | 0.28 | 0.12 | 0.35 | 0.25 | 0.13 |
| chr11 | 17111329  | 17111729  | Wdr92         | ENSMUSG00000078970 | 103   | NA   | 0.21 | 0.09 | 0.14 | 0.12 | 0.18 |
| chr11 | 21471827  | 21472473  | Mdh1          | ENSMUSG00000020321 | 46    | NA   | 0.54 | 0.11 | 0.29 | 0.15 | 0.19 |
| chr11 | 22908253  | 22908693  | Fam161a       | ENSMUSG00000049811 | 126   | NA   | 0.25 | 0.12 | 0.17 | 0.5  | 0.17 |
| chr11 | 23397515  | 23397931  | Ahsa2         | ENSMUSG00000020288 | -185  | 0.14 | 0.13 | 0.13 | 0.13 | NA   | 0.15 |
| chr11 | 23398117  | 23398359  | Ahsa2         | ENSMUSG00000020288 | -208  | NA   | NA   | 0.33 | NA   | NA   | 0.31 |
| chr11 | 28483291  | 28483837  | Ccdc85a       | ENSMUSG00000032878 | 431   | 0.33 | NA   | 0.25 | NA   | NA   | 0.19 |
| chr11 | 29147060  | 29147529  | Ccdc104       | ENSMUSG00000020462 | -226  | NA   | 0.24 | 0.09 | 0.14 | 0.12 | 0.16 |
| chr11 | 29447429  | 29448012  | Rps27a        | ENSMUSG00000020460 | 140   | NA   | 0.14 | 1    | 0.18 | 0.22 | 0.48 |
| chr11 | 32247832  | 32248181  | Sh3pxd2b      | ENSMUSG00000040711 | 166   | NA   | NA   | 0.2  | 0.25 | NA   | 0.17 |
| chr11 | 33062421  | 33063415  | Npm1          | ENSMUSG00000057113 | 154   | NA   | 0.21 | 0.17 | 0.49 | 1    | 0.28 |
| chr11 | 43561221  | 43561547  | Ttc1          | ENSMUSG00000041278 | 100   | NA   | 0.12 | 0.19 | 0.14 | 0.06 | 0.21 |

|       |          |          |               |                    |       |      |      |      |      |      |      |
|-------|----------|----------|---------------|--------------------|-------|------|------|------|------|------|------|
| chr11 | 44433837 | 44434148 | Ebf1          | ENSMUSG00000057098 | -1271 | NA   | 1    | NA   | 1    | 0.5  | 0.6  |
| chr11 | 48663043 | 48663249 | Trim7         | ENSMUSG00000040350 | 1742  | NA   | NA   | 1    | 1    | NA   | 1    |
| chr11 | 49988164 | 49988518 | 3010026O09Rik | ENSMUSG00000020381 | -10   | 0.1  | 0.14 | 0.08 | 0.14 | NA   | 0.11 |
| chr11 | 50039194 | 50039448 | Mgat4b        | ENSMUSG00000036620 | 484   | NA   | NA   | 0.06 | NA   | NA   | 0.12 |
| chr11 | 50044468 | 50044824 | Mgat4b        | ENSMUSG00000036620 | 396   | NA   | NA   | NA   | NA   | 1    | 1    |
| chr11 | 51397998 | 51398512 | Agxt2l2       | ENSMUSG00000020359 | -4    | NA   | 0.33 | 0.1  | 0.12 | 0.29 | 0.14 |
| chr11 | 51781068 | 51781399 | Cdkn2aipnl    | ENSMUSG00000020392 | 70    | NA   | NA   | NA   | 1    | NA   | NA   |
| chr11 | 53279923 | 53280398 | Shroom1       | ENSMUSG00000018387 | 1162  | NA   | 0.2  | 0.15 | 0.21 | 0.19 | 0.3  |
| chr11 | 54674080 | 54674425 | Lym7          | ENSMUSG00000020268 | -165  | 0.14 | NA   | 0.12 | 0.08 | NA   | NA   |
| chr11 | 54716274 | 54716535 | Gpx3          | ENSMUSG00000018339 | 130   | NA   | 1    | 0.1  | 0.08 | 0.1  | 0.12 |
| chr11 | 54911518 | 54911789 | Gm2a          | ENSMUSG00000000594 | 36    | NA   | 1    | NA   | 0.1  | NA   | 0.24 |
| chr11 | 57917281 | 57918207 | Cnot8         | ENSMUSG00000020515 | 89    | 0.25 | 0.6  | 0.41 | 0.64 | NA   | 0.23 |
| chr11 | 57985331 | 57985545 | Mrpl22        | ENSMUSG00000020514 | 247   | NA   | 1    | 0.15 | 0.11 | 0.08 | 0.15 |
| chr11 | 58660639 | 58660877 | Gm12258       | ENSMUSG00000068869 | 98    | NA   | 0.1  | NA   | 0.17 | 0.12 | 0.21 |
| chr11 | 58680675 | 58680919 | 2810021J22Rik | ENSMUSG00000020491 | 79    | NA   | 0.2  | 0.24 | 0.19 | 0.19 | 0.18 |
| chr11 | 58767396 | 58768561 | Hist3h2bb-ps  | ENSMUSG00000080712 | 36    | NA   | NA   | 0.07 | 0.11 | NA   | 0.19 |
| chr11 | 59021691 | 59022217 | 2310033P09Rik | ENSMUSG00000020441 | 131   | NA   | NA   | 1    | NA   | NA   | 0.25 |
| chr11 | 59777352 | 59777744 | Rasd1         | ENSMUSG00000049892 | 898   | 0.04 | 0.05 | 0.15 | 0.21 | NA   | 0.08 |
| chr11 | 59954210 | 59954415 | Rai1          | ENSMUSG00000062115 | 551   | NA   | 0.24 | 0.18 | 0.23 | 0.12 | 0.36 |
| chr11 | 60036256 | 60036465 | Srebf1        | ENSMUSG00000020538 | -277  | NA   | 0.2  | 0.09 | 0.19 | 0.5  | 0.16 |
| chr11 | 60497497 | 60497784 | Gm12620       | ENSMUSG00000081472 | 26    | NA   | NA   | 0.96 | 0.98 | 1    | 0.96 |
| chr11 | 62944886 | 62945102 | Pmp22         | ENSMUSG00000018217 | -20   | NA   | 0.2  | 0.07 | 0.09 | 0.25 | 0.14 |
| chr11 | 68369509 | 68369777 | Mfsd6l        | ENSMUSG00000048329 | -45   | 0.25 | 0.24 | 0.24 | 1    | NA   | 0.19 |
| chr11 | 68821799 | 68822035 | Pfas          | ENSMUSG00000020899 | 36    | NA   | 0.5  | 0.44 | 0.62 | NA   | 0.73 |
| chr11 | 68947741 | 68948078 | Aloxe3        | ENSMUSG00000020892 | 90    | NA   | NA   | NA   | NA   | NA   | 1    |
| chr11 | 69145583 | 69145821 | Gm16040       | ENSMUSG00000086900 | -78   | NA   | NA   | 0.33 | 0.5  | NA   | NA   |
| chr11 | 69468969 | 69469256 | Sox15         | ENSMUSG00000041287 | 296   | 1    | NA   | 0.33 | 1    | NA   | 0.29 |
| chr11 | 69476049 | 69476299 | Mpdu1         | ENSMUSG00000018761 | -112  | NA   | NA   | NA   | NA   | NA   | 0.3  |
| chr11 | 70053134 | 70053352 | Rnasek        | ENSMUSG00000040904 | 39    | NA   | NA   | 1    | NA   | NA   | NA   |
| chr11 | 70265337 | 70265771 | Med11         | ENSMUSG00000018923 | 133   | NA   | 0.45 | 0.12 | 0.17 | 0.5  | 0.12 |



|       |          |          |               |                    |       |      |      |      |      |      |      |
|-------|----------|----------|---------------|--------------------|-------|------|------|------|------|------|------|
| chr11 | 70783066 | 70783523 | Nup88         | ENSMUSG00000040667 | 162   | NA   | 0.08 | 0.09 | 0.1  | 0.09 | 0.18 |
| chr11 | 70846683 | 70846986 | 6330403K07Rik | ENSMUSG00000018451 | 181   | NA   | 0.25 | 0.15 | 0.18 | 0.4  | 0.13 |
| chr11 | 71864517 | 71864854 | Pitpnm3       | ENSMUSG00000040543 | 866   | NA   | 0.5  | 0.17 | 0.24 | 0.25 | 0.17 |
| chr11 | 72028406 | 72029147 | Med31         | ENSMUSG00000020801 | -221  | NA   | 0.35 | 0.11 | 0.16 | 0.16 | 0.11 |
| chr11 | 72175372 | 72175680 | Tekt1         | ENSMUSG00000020799 | -151  | NA   | NA   | 0.11 | 1    | NA   | NA   |
| chr11 | 73142996 | 73143253 | Spata22       | ENSMUSG00000069825 | -119  | NA   | NA   | 1    | NA   | NA   | NA   |
| chr11 | 75267952 | 75268269 | Wdr81         | ENSMUSG00000045374 | 109   | 0.5  | 0.5  | 0.09 | 0.28 | NA   | 0.14 |
| chr11 | 76414780 | 76415113 | Rpl36-ps2     | ENSMUSG00000024205 | 125   | NA   | NA   | 0.86 | 1    | NA   | 0.96 |
| chr11 | 76811904 | 76812342 | Slc6a4        | ENSMUSG00000020838 | 18    | 0.07 | 0.71 | 0.12 | 0.13 | NA   | 0.15 |
| chr11 | 77305212 | 77305416 | Git1          | ENSMUSG00000011877 | -1750 | 0.14 | 0.38 | 0.13 | 0.33 | NA   | 0.25 |
| chr11 | 77996805 | 77997041 | Rpl23a        | ENSMUSG00000058546 | 163   | NA   | 0.7  | 0.17 | 0.4  | 0.25 | 0.35 |
| chr11 | 78639948 | 78640357 | 1810012P15Rik | ENSMUSG00000072640 | 66    | NA   | 0.49 | 0.13 | 0.14 | 0.17 | 0.15 |
| chr11 | 80191387 | 80191604 | 5730455P16Rik | ENSMUSG00000057181 | 41    | NA   | 0.11 | 0.08 | 1    | 0.16 | 0.12 |
| chr11 | 82704026 | 82704235 | Rad51l3       | ENSMUSG00000018841 | -39   | NA   | 0.14 | 0.11 | 0.18 | 0.12 | 0.09 |
| chr11 | 83112227 | 83112659 | Pex12         | ENSMUSG00000018733 | -46   | NA   | 0.14 | 0.08 | 0.17 | 0.06 | 0.14 |
| chr11 | 83666732 | 83666961 | Hnf1b         | ENSMUSG00000020679 | 384   | 0.12 | 0.25 | 0.21 | NA   | NA   | 0.2  |
| chr11 | 84729663 | 84729865 | Znhit3        | ENSMUSG00000020526 | 43    | NA   | NA   | 0.15 | NA   | NA   | 0.31 |
| chr11 | 84771221 | 84771750 | Car4          | ENSMUSG00000000805 | 197   | 1    | NA   | 0.56 | NA   | NA   | 0.33 |
| chr11 | 85166149 | 85166750 | Bcas3         | ENSMUSG00000059439 | -220  | NA   | 0.36 | 0.07 | 0.43 | 0.33 | 0.16 |
| chr11 | 86071044 | 86071275 | Ints2         | ENSMUSG00000018068 | -107  | NA   | NA   | NA   | 1    | 0.33 | 1    |
| chr11 | 86620804 | 86621297 | Dhx40         | ENSMUSG00000018425 | 112   | 0.17 | 0.8  | 0.12 | 0.28 | NA   | 0.13 |
| chr11 | 86887464 | 86887746 | Gdpd1         | ENSMUSG00000061666 | -41   | NA   | 0.24 | 0.12 | 0.3  | 0.2  | 0.24 |
| chr11 | 87256288 | 87256731 | U3            | ENSMUSG00000070251 | -230  | NA   | 0.38 | 0.14 | 0.1  | 0.04 | 0.08 |
| chr11 | 87261678 | 87262121 | U3            | ENSMUSG00000070243 | -230  | 0.12 | 0.24 | 0.09 | 0.25 | NA   | 0.1  |
| chr11 | 87275395 | 87275780 | U3            | ENSMUSG00000070190 | -201  | 0.83 | NA   | NA   | NA   | NA   | NA   |
| chr11 | 87550197 | 87550503 | Supt4h1       | ENSMUSG00000020485 | -704  | NA   | 0.11 | 0.15 | 0.21 | 0.05 | 0.16 |
| chr11 | 87630644 | 87630918 | Lpo           | ENSMUSG00000009356 | 226   | NA   | NA   | 0.08 | 0.11 | 0.05 | 0.13 |
| chr11 | 87684885 | 87685115 | Epx           | ENSMUSG00000052234 | 270   | NA   | NA   | 0.68 | 1    | 1    | 0.85 |
| chr11 | 88107877 | 88108090 | 1700106J16Rik | ENSMUSG00000034031 | 438   | NA   | 1    | 0.25 | NA   | NA   | 0.33 |
| chr11 | 88816541 | 88816827 | Scpep1        | ENSMUSG00000000278 | 16    | 1    | NA   | 0.21 | 0.18 | NA   | 1    |

|       |           |           |               |                     |       |      |      |      |      |      |      |
|-------|-----------|-----------|---------------|---------------------|-------|------|------|------|------|------|------|
| chr11 | 94347299  | 94347620  | Spata20       | ENSMUSG00000020867  | 34    | 1    | NA   | 0.2  | 0.67 | NA   | 0.5  |
| chr11 | 96144242  | 96144715  | Hoxb8         | ENSMUSG00000056648  | 439   | NA   | NA   | 0.12 | 1    | NA   | 0.4  |
| chr11 | 96160413  | 96160930  | Hoxb6         | ENSMUSG00000000690  | 402   | NA   | 0.6  | 0.22 | 0.24 | 0.21 | 0.2  |
| chr11 | 96203251  | 96203634  | Gm11536       | ENSMUSG00000075589  | -20   | 0.13 | 0.14 | 0.18 | 0.34 | NA   | 0.25 |
| chr11 | 96227188  | 96227579  | Hoxb1         | ENSMUSG00000018973  | -189  | NA   | 0.39 | 0.16 | 0.11 | 0.05 | 0.09 |
| chr11 | 96805019  | 96805228  | Pnpo          | ENSMUSG00000018659  | -30   | 0.44 | NA   | 0.38 | NA   | NA   | NA   |
| chr11 | 98245530  | 98245752  | Tcap          | ENSMUSG00000007877  | 516   | NA   | NA   | NA   | NA   | NA   | 1    |
| chr11 | 98261480  | 98261819  | Pgap3         | ENSMUSG00000038208  | 79    | NA   | NA   | 0.1  | 0.13 | 0.08 | 0.18 |
| chr11 | 98797485  | 98797753  | Rara          | ENSMUSG00000037992  | -1393 | NA   | NA   | 0.2  | NA   | NA   | 0.87 |
| chr11 | 99793859  | 99794060  | Gm11560       | ENSMUSG00000086688  | 483   | NA   | NA   | 1    | NA   | NA   | NA   |
| chr11 | 100217745 | 100217977 | Hap1          | ENSMUSG00000006930  | -406  | 0.15 | NA   | 0.18 | 0.2  | NA   | 0.24 |
| chr11 | 100931197 | 100931807 | Naglu         | ENSMUSG00000001751  | 176   | NA   | 0.17 | 0.11 | 0.1  | 0.69 | 0.22 |
| chr11 | 100943768 | 100944104 | Coasy         | ENSMUSG00000001755  | 57    | NA   | 1    | 0.1  | 0.17 | 1    | 0.15 |
| chr11 | 101329129 | 101329473 | Rnd2          | ENSMUSG00000001313  | -188  | NA   | NA   | 1    | 1    | 1    | 1    |
| chr11 | 101413090 | 101413291 | Brca1         | ENSMUSG000000017146 | 3     | NA   | NA   | 1    | NA   | NA   | 0.46 |
| chr11 | 101507246 | 101507560 | U2            | ENSMUSG000000065251 | -159  | NA   | 0.25 | 0.16 | 0.2  | NA   | 0.13 |
| chr11 | 101519283 | 101519549 | U2            | ENSMUSG000000065944 | -136  | NA   | NA   | NA   | NA   | NA   | 1    |
| chr11 | 101949762 | 101950143 | Mpp2          | ENSMUSG000000017314 | -183  | NA   | NA   | 0.09 | NA   | 0.5  | 0.11 |
| chr11 | 102146054 | 102146295 | Tmub2         | ENSMUSG000000034757 | -71   | 0.5  | NA   | 0.33 | 0.67 | NA   | 0.14 |
| chr11 | 102809873 | 102810101 | C1ql1         | ENSMUSG000000045532 | -1985 | NA   | 0.18 | 0.16 | 0.44 | 0.22 | 0.22 |
| chr11 | 102977328 | 102977531 | Hexim1        | ENSMUSG000000048878 | -210  | NA   | NA   | 0.23 | 0.3  | NA   | 0.1  |
| chr11 | 102977711 | 102977971 | Hexim1        | ENSMUSG000000048878 | 202   | 1    | 0.08 | NA   | 0.28 | NA   | 0.15 |
| chr11 | 103079602 | 103079814 | 4933400C05Rik | ENSMUSG000000044787 | 38    | NA   | NA   | 0.08 | 0.18 | NA   | 0.1  |
| chr11 | 103827788 | 103828426 | Arf2          | ENSMUSG000000062421 | 54    | 0.24 | 0.33 | 0.16 | 0.17 | NA   | 0.14 |
| chr11 | 106116627 | 106116887 | Ftsj3         | ENSMUSG000000020706 | 353   | NA   | NA   | 0.11 | 0.68 | 0.33 | 0.15 |
| chr11 | 106640541 | 106640946 | Polg2         | ENSMUSG000000020718 | 44    | NA   | 0.06 | 0.09 | 0.14 | 0.08 | 0.11 |
| chr11 | 109583332 | 109583642 | Fam20a        | ENSMUSG000000020614 | 83    | NA   | 0.33 | 0.16 | 0.16 | 0.5  | 0.22 |
| chr11 | 113062747 | 113063242 | 2610035D17Rik | ENSMUSG000000087259 | 142   | NA   | NA   | 1    | NA   | NA   | NA   |
| chr11 | 115489075 | 115489348 | Slc25a19      | ENSMUSG000000020744 | 51    | 0.04 | 0.33 | 0.16 | 0.18 | NA   | 0.14 |
| chr11 | 115794763 | 115795091 | Recq15        | ENSMUSG000000020752 | -136  | NA   | 0.5  | NA   | NA   | NA   | 0.18 |

|       |           |           |               |                     |      |      |      |      |      |      |      |
|-------|-----------|-----------|---------------|---------------------|------|------|------|------|------|------|------|
| chr11 | 116029201 | 116029687 | Fbf1          | ENSMUSG00000020776  | 18   | 0.56 | NA   | 0.16 | NA   | NA   | 0.21 |
| chr11 | 117644408 | 117644824 | Tmc8          | ENSMUSG00000050106  | 252  | NA   | 0.05 | 0.13 | 0.11 | 0.1  | 0.19 |
| chr11 | 119873301 | 119873619 | Aatk          | ENSMUSG00000025375  | 262  | NA   | NA   | 0.2  | 0.3  | 0.62 | 0.47 |
| chr11 | 119908110 | 119908501 | Aatk          | ENSMUSG00000025375  | 79   | NA   | NA   | 0.08 | 0.32 | NA   | 0.23 |
| chr11 | 120574536 | 120575340 | Stra13        | ENSMUSG00000025144  | 108  | NA   | 0.17 | 0.12 | 0.15 | 0.26 | 0.21 |
| chr12 | 112509272 | 112510208 | Amn           | ENSMUSG00000021278  | 418  | 0.55 | 0.25 | 0.26 | 0.26 | 0.22 | 0.32 |
| chr12 | 86560096  | 86560856  | Eif2b2        | ENSMUSG00000004788  | 45   | 0.36 | 0.13 | 0.09 | 0.2  | 0.07 | 0.13 |
| chr12 | 27099327  | 27100213  | Rnf144a       | ENSMUSG00000020642  | 351  | 0.55 | 0.1  | 0.12 | 0.16 | 0.08 | 0.13 |
| chr12 | 66018773  | 66019340  | Gm527         | ENSMUSG000000047227 | 158  | 0.3  | 0.06 | 0.07 | 0.13 | 0.08 | 0.09 |
| chr12 | 111975740 | 111977085 | Wdr20a        | ENSMUSG00000037957  | 258  | 0.29 | 0.14 | 0.14 | 0.18 | 0.09 | 0.17 |
| chr12 | 99497014  | 99497664  | Galc          | ENSMUSG00000021003  | 330  | 0.31 | 0.27 | 0.12 | 0.2  | 0.11 | 0.17 |
| chr12 | 101437456 | 101439070 | Calm1         | ENSMUSG00000001175  | 618  | 0.28 | 0.18 | 0.11 | 0.14 | 0.11 | 0.16 |
| chr12 | 117643653 | 117644249 | Ncapg2        | ENSMUSG000000042029 | 76   | 0.18 | 0.12 | 0.08 | 0.17 | 0.04 | 0.11 |
| chr12 | 81233413  | 81233937  | 2310015A10Rik | ENSMUSG000000085644 | 156  | 0.32 | 0.28 | 0.09 | 0.16 | 0.12 | 0.11 |
| chr12 | 86611326  | 86611645  | Mlh3          | ENSMUSG000000021245 | 29   | 0.32 | 0.09 | 0.1  | 0.19 | 0.07 | 0.14 |
| chr12 | 76277630  | 76277957  | Kcnh5         | ENSMUSG000000034402 | 526  | 0.2  | 0.13 | 0.07 | 0.08 | 0.06 | 0.1  |
| chr12 | 4913793   | 4914631   | Ubxn2a        | ENSMUSG000000020634 | -142 | 0.17 | 0.18 | 0.07 | 0.13 | 0.09 | 0.14 |
| chr12 | 112950753 | 112951761 | Bag5          | ENSMUSG000000049792 | -119 | 0.17 | 0.08 | 0.1  | 0.16 | 0.07 | 0.12 |
| chr12 | 45322662  | 45323266  | Pnpla8        | ENSMUSG000000036257 | 607  | 0.17 | 0.14 | 0.12 | 0.09 | 0.09 | 0.1  |
| chr12 | 76836228  | 76836921  | Sgpp1         | ENSMUSG000000021054 | 103  | 0.19 | 0.11 | 0.11 | 0.14 | 0.06 | 0.16 |
| chr12 | 45310452  | 45311417  | Dnajb9        | ENSMUSG000000014905 | 121  | 0.54 | 0.21 | 0.14 | 0.15 | 0.11 | 0.13 |
| chr12 | 68321617  | 68323878  | Mdga2         | ENSMUSG000000034912 | -511 | 0.26 | 0.24 | 0.13 | 0.18 | 0.13 | 0.13 |
| chr12 | 57712769  | 57713295  | Nkx2-9        | ENSMUSG000000058669 | 1239 | 0.38 | 0.29 | 0.14 | 0.2  | 0.08 | 0.15 |
| chr12 | 102266651 | 102267625 | Ccdc88c       | ENSMUSG000000021182 | -19  | 0.48 | 0.14 | 0.09 | 0.16 | 0.13 | 0.12 |
| chr12 | 88222717  | 88225884  | 6430527G18Rik | ENSMUSG000000034168 | 1464 | 0.21 | 0.18 | 0.13 | 0.16 | 0.12 | 0.16 |
| chr12 | 47920426  | 47920660  | Nova1         | ENSMUSG000000021047 | -781 | 0.67 | 0.26 | 0.09 | 0.19 | 0.08 | 0.12 |
| chr12 | 73171092  | 73172167  | Gpr135        | ENSMUSG000000043398 | 349  | 0.34 | 0.11 | 0.16 | 0.14 | 0.1  | 0.17 |
| chr12 | 82127691  | 82128189  | Smoc1         | ENSMUSG000000021136 | 145  | 0.39 | 0.5  | 0.15 | 0.3  | 0.13 | 0.19 |
| chr12 | 50502280  | 50502739  | Gm9804        | ENSMUSG000000045946 | 245  | 0.31 | 0.19 | 0.11 | 0.14 | 0.13 | 0.15 |
| chr12 | 113911882 | 113912644 | Akt1          | ENSMUSG000000001729 | -108 | 0.37 | 0.24 | 0.07 | 0.18 | 0.22 | 0.14 |

|       |           |           |               |                     |       |      |      |      |      |      |      |
|-------|-----------|-----------|---------------|---------------------|-------|------|------|------|------|------|------|
| chr12 | 114394188 | 114394822 | 4930427A07Rik | ENSMUSG000000037466 | -127  | 0.24 | 0.2  | 0.1  | 0.11 | 0.07 | 0.2  |
| chr12 | 120085201 | 120085696 | Sp8           | ENSMUSG000000048562 | -216  | 0.07 | 0.07 | 0.24 | 0.33 | 0.18 | 0.23 |
| chr12 | 75065382  | 75065959  | Snopc1        | ENSMUSG000000021113 | 153   | 0.1  | 0.19 | 0.1  | 0.11 | 0.37 | 0.17 |
| chr12 | 83270215  | 83271397  | Sipa111       | ENSMUSG000000042700 | 399   | 0.18 | 0.29 | 0.13 | 0.16 | 0.07 | 0.13 |
| chr12 | 105989685 | 105990579 | Dicer1        | ENSMUSG000000041415 | 30    | 0.3  | 0.33 | 0.11 | 0.19 | 0.14 | 0.16 |
| chr12 | 29334390  | 29334699  | Rnaseh1       | ENSMUSG000000020630 | 77    | 1    | 0.25 | 0.11 | NA   | 0.05 | 0.35 |
| chr12 | 77810463  | 77811677  | Spnb1         | ENSMUSG000000021061 | -60   | 0.17 | 0.32 | 0.1  | 0.15 | 0.07 | 0.1  |
| chr12 | 31569067  | 31569753  | Fam150b       | ENSMUSG000000054204 | 223   | 0.19 | 0.09 | 0.12 | 0.11 | 0.07 | 0.13 |
| chr12 | 113960055 | 113960976 | AW555464      | ENSMUSG000000072825 | 130   | 0.12 | 0.11 | 0.1  | 0.11 | 0.07 | 0.08 |
| chr12 | 101758521 | 101758897 | Ttc7b         | ENSMUSG000000033530 | 323   | 0.31 | 0.09 | 0.08 | 0.1  | 0.1  | 0.11 |
| chr12 | 45370121  | 45370559  | Pnpla8        | ENSMUSG000000036257 | 167   | 0.07 | 0.25 | 0.09 | 0.15 | 0.18 | 0.12 |
| chr12 | 13255601  | 13256083  | Ddx1          | ENSMUSG000000037149 | 177   | 0.14 | 0.14 | 0.12 | 0.16 | 0.06 | 0.16 |
| chr12 | 8777792   | 8779747   | Gm4755        | ENSMUSG000000087567 | -782  | 0.26 | 0.34 | 0.11 | 0.16 | 0.14 | 0.16 |
| chr12 | 77504449  | 77507152  | 4930426124Rik | ENSMUSG000000091710 | -1159 | 0.19 | 0.2  | 0.15 | 0.22 | 0.13 | 0.15 |
| chr12 | 5380506   | 5382865   | Klhl29        | ENSMUSG000000020627 | 803   | 0.16 | 0.2  | 0.11 | 0.15 | 0.1  | 0.17 |
| chr12 | 82046321  | 82047316  | Srsf5         | ENSMUSG000000021134 | 327   | 0.08 | 0.13 | 0.11 | 0.17 | 0.18 | 0.21 |
| chr12 | 32319287  | 32319698  | Bcap29        | ENSMUSG000000020650 | -30   | 0.27 | 0.26 | 0.09 | 0.14 | 0.11 | 0.23 |
| chr12 | 56921499  | 56922224  | Gm9812        | ENSMUSG000000046747 | 263   | 0.29 | 0.07 | 0.12 | 0.13 | 0.08 | 0.08 |
| chr12 | 55304098  | 55304925  | Egln3         | ENSMUSG000000035105 | 336   | 0.5  | 0.16 | 0.12 | 0.15 | 0.16 | 0.18 |
| chr12 | 59313379  | 59314249  | Sstr1         | ENSMUSG000000035431 | 1023  | 0.28 | 0.07 | 0.07 | 0.16 | 0.06 | 0.1  |
| chr12 | 60320022  | 60321162  | Fbxo33        | ENSMUSG000000035329 | 120   | 0.23 | 0.12 | 0.1  | 0.12 | 0.12 | 0.16 |
| chr12 | 79962339  | 79963366  | Atp6v1d       | ENSMUSG000000021114 | -311  | 0.33 | 0.11 | 0.1  | 0.16 | 0.17 | 0.16 |
| chr12 | 4824059   | 4824712   | 0610009D07Rik | ENSMUSG000000037361 | -29   | 0.25 | 0.22 | 0.17 | 0.14 | 0.12 | 0.18 |
| chr12 | 19495837  | 19496693  | Gm6802        | ENSMUSG000000059229 | 102   | 0.55 | 0.67 | 0.75 | 0.81 | 0.37 | 0.6  |
| chr12 | 86679893  | 86680485  | Nek9          | ENSMUSG000000034290 | 123   | 0.62 | 0.33 | 0.12 | 0.27 | 0.28 | 0.14 |
| chr12 | 87582685  | 87583163  | 1700020O03Rik | ENSMUSG000000021254 | 105   | 0.89 | 0.09 | 0.12 | 0.18 | 0.48 | 0.25 |
| chr12 | 111839460 | 111840216 | Dync1h1       | ENSMUSG000000018707 | 176   | 0.29 | 0.19 | 0.09 | 0.19 | 0.16 | 0.16 |
| chr12 | 70683632  | 70684088  | Mettl21d      | ENSMUSG000000049882 | 155   | 0.41 | 0.27 | 0.1  | 0.08 | 0.34 | 0.15 |
| chr12 | 113204826 | 113205324 | 2010107E04Rik | ENSMUSG000000021290 | 113   | 0.25 | 0.1  | 0.15 | 0.21 | 0.09 | 0.16 |
| chr12 | 109572588 | 109573003 | Cyp46a1       | ENSMUSG000000021259 | 208   | 0.38 | 0.1  | 0.12 | 0.15 | 0.2  | 0.13 |

|       |           |           |               |                    |      |      |      |      |      |      |      |
|-------|-----------|-----------|---------------|--------------------|------|------|------|------|------|------|------|
| chr12 | 33063599  | 33064830  | 2010109K11Rik | ENSMUSG00000078373 | -297 | 0.23 | 0.19 | 0.11 | 0.17 | 0.16 | 0.13 |
| chr12 | 53071772  | 53072432  | Heatr5a       | ENSMUSG00000035181 | 206  | 0.41 | 0.22 | 0.14 | 0.2  | 0.21 | 0.17 |
| chr12 | 23786837  | 23787537  | Gm20486       | ENSMUSG00000092597 | 249  | 0.37 | 0.42 | 0.69 | 0.58 | 1    | 0.34 |
| chr12 | 85262149  | 85263005  | Numb          | ENSMUSG00000021224 | 217  | 0.2  | 0.11 | 0.09 | 0.15 | 0.12 | 0.16 |
| chr12 | 113368516 | 113369320 | Mir203        | ENSMUSG00000065574 | -173 | 0.17 | 0.17 | 0.14 | 0.18 | 0.1  | 0.14 |
| chr12 | 57636818  | 57637678  | Nkx2-1        | ENSMUSG00000001496 | 647  | 0.14 | 0.1  | 0.12 | 0.17 | 0.07 | 0.15 |
| chr12 | 119081907 | 119082730 | Cdca7l        | ENSMUSG00000021175 | 330  | 0.36 | 0.2  | 0.18 | 0.24 | 0.2  | 0.15 |
| chr12 | 79326807  | 79328424  | Gphn          | ENSMUSG00000047454 | -27  | 0.14 | 0.16 | 0.11 | 0.15 | 0.08 | 0.11 |
| chr12 | 16596359  | 16596652  | Lpin1         | ENSMUSG00000020593 | 71   | 0.5  | 0.35 | 0.09 | 0.15 | 0.06 | 0.12 |
| chr12 | 21322096  | 21322581  | Iah1          | ENSMUSG00000062054 | 85   | 0.58 | 0.56 | 0.15 | 0.12 | 0.25 | 0.09 |
| chr12 | 81891380  | 81892206  | 4933426M11Rik | ENSMUSG00000021133 | 247  | 0.06 | 0.27 | 0.16 | 0.2  | 0.16 | 0.2  |
| chr12 | 85489065  | 85489519  | Pnma1         | ENSMUSG00000054383 | 147  | 0.26 | 0.19 | 0.11 | 0.16 | 0.14 | 0.12 |
| chr12 | 79849518  | 79850526  | Mpp5          | ENSMUSG00000021112 | 88   | 0.22 | 0.31 | 0.13 | 0.13 | 0.13 | 0.14 |
| chr12 | 112404567 | 112405142 | Traf3         | ENSMUSG00000021277 | 273  | 0.12 | 0.1  | 0.1  | 0.12 | 0.21 | 0.11 |
| chr12 | 74018425  | 74018991  | 4930447C04Rik | ENSMUSG00000021098 | 39   | 0.24 | 0.19 | 0.15 | 0.15 | 0.1  | 0.17 |
| chr12 | 112216845 | 112217492 | Ankrd9        | ENSMUSG00000037904 | -15  | 0.1  | 0.07 | 0.09 | 0.11 | 0.06 | 0.1  |
| chr12 | 86715209  | 86715709  | Tmed10        | ENSMUSG00000021248 | 208  | 1    | 1    | 0.16 | 0.48 | 0.25 | 0.17 |
| chr12 | 56937211  | 56937862  | Brms1l        | ENSMUSG00000012076 | 183  | 0.07 | 0.11 | 0.11 | 0.14 | 0.04 | 0.1  |
| chr12 | 73509252  | 73509728  | Rtn1          | ENSMUSG00000021087 | 48   | 0.16 | 0.2  | 0.07 | 0.15 | 0.07 | 0.12 |
| chr12 | 110073618 | 110074587 | Slc25a29      | ENSMUSG00000021265 | -72  | 0.07 | 0.16 | 0.09 | 0.16 | 0.17 | 0.13 |
| chr12 | 88066896  | 88067509  | Angel1        | ENSMUSG00000021257 | 208  | 0.18 | 0.09 | 0.12 | 0.15 | 0.07 | 0.17 |
| chr12 | 80107757  | 80108439  | Tmem229b      | ENSMUSG00000046157 | 166  | 0.17 | 0.18 | 0.11 | 0.11 | 0.3  | 0.21 |
| chr12 | 113748983 | 113749482 | Tmem179       | ENSMUSG00000054013 | 139  | 0.83 | 1    | 0.6  | NA   | 0.28 | 0.25 |
| chr12 | 32745481  | 32746123  | Prkar2b       | ENSMUSG0000002997  | 298  | 0.27 | 0.21 | 0.2  | 0.12 | 0.17 | 0.16 |
| chr12 | 76918990  | 76920111  | Syne2         | ENSMUSG00000063450 | 429  | 0.15 | 0.21 | 0.19 | 0.17 | 0.25 | 0.14 |
| chr12 | 77470018  | 77472296  | Zbtb25        | ENSMUSG00000056459 | -777 | 0.12 | 0.18 | 0.12 | 0.14 | 0.17 | 0.15 |
| chr12 | 89592834  | 89593135  | Gm6190        | ENSMUSG00000091139 | -302 | 0.27 | 0.17 | 0.22 | 0.31 | 0.13 | 0.27 |
| chr12 | 52791906  | 52793295  | Ap4s1         | ENSMUSG00000020955 | 647  | 0.34 | 0.4  | 0.15 | 0.17 | 0.23 | 0.19 |
| chr12 | 12948358  | 12949595  | Mycn          | ENSMUSG00000037169 | -345 | 0.23 | 0.18 | 0.1  | 0.1  | 0.08 | 0.19 |
| chr12 | 106574862 | 106575791 | 2810011L19Rik | ENSMUSG00000086023 | 123  | 0.21 | 0.13 | 0.1  | 0.16 | 0.06 | 0.17 |

|       |           |           |               |                    |      |      |      |      |      |      |      |
|-------|-----------|-----------|---------------|--------------------|------|------|------|------|------|------|------|
| chr12 | 25256822  | 25257614  | Grhl1         | ENSMUSG00000020656 | 66   | 0.11 | 0.11 | 0.08 | 0.11 | 0.07 | 0.11 |
| chr12 | 110290537 | 110292092 | Begain        | ENSMUSG00000040867 | 275  | 0.17 | 0.15 | 0.12 | 0.12 | 0.13 | 0.13 |
| chr12 | 113916810 | 113917907 | Zbtb42        | ENSMUSG00000037638 | 319  | 0.13 | 0.09 | 0.08 | 0.14 | 0.1  | 0.09 |
| chr12 | 56085947  | 56087313  | Baz1a         | ENSMUSG00000035021 | 293  | 0.17 | 0.18 | 0.11 | 0.16 | 0.13 | 0.14 |
| chr12 | 102137099 | 102137718 | Gm10431       | ENSMUSG00000072880 | 206  | 1    | 1    | 0.67 | 0.11 | 0.15 | 0.11 |
| chr12 | 114067063 | 114067958 | Cdca4         | ENSMUSG00000047832 | 90   | 0.26 | 0.1  | 0.09 | 0.1  | 0.11 | 0.11 |
| chr12 | 62623887  | 62624356  | Lfn5          | ENSMUSG00000035653 | -16  | 0.33 | 0.08 | 0.1  | 0.07 | 0.05 | 0.15 |
| chr12 | 112276613 | 112278558 | Rcor1         | ENSMUSG00000037896 | 24   | 0.28 | 0.21 | 0.12 | 0.18 | 0.18 | 0.18 |
| chr12 | 46174989  | 46175621  | Sbxp6         | ENSMUSG00000046314 | -206 | 0.44 | 0.76 | 0.16 | 0.3  | 0.14 | 0.24 |
| chr12 | 51749953  | 51750433  | Prkd1         | ENSMUSG00000002688 | 17   | 0.09 | 0.29 | 0.09 | 0.15 | 0.16 | 0.19 |
| chr12 | 31949810  | 31951228  | Lamb1         | ENSMUSG00000002900 | 420  | 0.83 | 0.62 | 0.23 | 0.16 | 0.35 | 0.18 |
| chr12 | 55757143  | 55757793  | 1110002B05Rik | ENSMUSG00000044408 | 91   | 0.5  | 0.2  | 0.12 | 0.11 | 0.12 | 0.14 |
| chr12 | 17006526  | 17006884  | Pqlc3         | ENSMUSG00000045679 | 126  | 0.44 | 0.2  | 0.19 | 0.2  | 0.2  | 0.13 |
| chr12 | 85028869  | 85029515  | Psen1         | ENSMUSG00000019969 | 40   | 0.07 | 0.15 | 0.09 | 0.18 | 0.12 | 0.17 |
| chr12 | 103995522 | 103996544 | Moap1         | ENSMUSG00000091931 | -23  | 0.15 | 0.15 | 0.1  | 0.13 | 0.11 | 0.19 |
| chr12 | 87762609  | 87763852  | Esrrb         | ENSMUSG00000021255 | 397  | 0.15 | 0.11 | 0.15 | 0.17 | 0.09 | 0.2  |
| chr12 | 86814388  | 86815702  | Fos           | ENSMUSG00000021250 | 205  | 0.23 | 0.14 | 0.1  | 0.18 | 0.09 | 0.19 |
| chr12 | 4775704   | 4776249   | A830093124Rik | ENSMUSG00000050545 | 97   | 0.89 | 0.31 | 0.3  | 0.24 | 0.42 | 0.24 |
| chr12 | 8680761   | 8681716   | Pum2          | ENSMUSG00000020594 | 298  | 0.25 | 0.15 | 0.12 | 0.12 | 0.16 | 0.13 |
| chr12 | 86039428  | 86040043  | Tmem90a       | ENSMUSG00000071234 | 22   | 0.24 | 0.12 | 0.08 | 0.12 | 0.15 | 0.11 |
| chr12 | 99975516  | 99975932  | Ptprn21       | ENSMUSG00000021009 | -109 | 0.33 | 0.33 | 0.05 | 0.11 | 0.15 | 0.12 |
| chr12 | 37108215  | 37108808  | D630036H23Rik | ENSMUSG00000091007 | 257  | 0.1  | 0.13 | 0.11 | 0.14 | 0.06 | 0.14 |
| chr12 | 100138803 | 100139780 | Eml5          | ENSMUSG00000051166 | 16   | 0.29 | 0.45 | 0.18 | 0.11 | 0.14 | 0.12 |
| chr12 | 112680563 | 112681124 | Tnfrsf2       | ENSMUSG00000021281 | 163  | 0.16 | 0.2  | 0.13 | 0.18 | 0.28 | 0.23 |
| chr12 | 17182297  | 17183532  | Kcnf1         | ENSMUSG00000051726 | 74   | 0.1  | 0.12 | 0.09 | 0.12 | 0.15 | 0.15 |
| chr12 | 103521156 | 103521686 | Rin3          | ENSMUSG00000044456 | 163  | 0.21 | 0.13 | 0.15 | 0.14 | 0.32 | 0.1  |
| chr12 | 3235440   | 3235920   | 1700012B15Rik | ENSMUSG00000079179 | -931 | 0.16 | 0.07 | 0.17 | 0.19 | 0.08 | 0.18 |
| chr12 | 74685438  | 74686690  | Prkch         | ENSMUSG00000021108 | 281  | 0.11 | 0.21 | 0.12 | 0.15 | 0.18 | 0.15 |
| chr12 | 104187067 | 104187854 | Unc97         | ENSMUSG00000021198 | 391  | 0.32 | 0.12 | 0.14 | 0.23 | 0.19 | 0.14 |
| chr12 | 17273202  | 17273667  | Pdia6         | ENSMUSG00000020571 | 83   | 0.33 | 0.14 | 0.09 | 0.14 | 0.18 | 0.11 |

|       |           |           |               |                    |      |      |      |      |      |      |      |
|-------|-----------|-----------|---------------|--------------------|------|------|------|------|------|------|------|
| chr12 | 70993470  | 70994454  | Map4k5        | ENSMUSG00000034761 | 34   | 0.17 | 0.08 | 0.09 | 0.14 | 0.12 | 0.14 |
| chr12 | 72116207  | 72117543  | 3110056K07Rik | ENSMUSG00000085622 | -292 | 0.24 | 0.13 | 0.1  | 0.15 | 0.18 | 0.14 |
| chr12 | 81861290  | 81861575  | Gm1568        | ENSMUSG00000062961 | 96   | 0.28 | 0.28 | 0.17 | 0.17 | 0.11 | 0.19 |
| chr12 | 110691195 | 110692057 | Dlk1          | ENSMUSG00000040856 | -39  | 0.26 | 0.29 | 0.08 | 0.09 | 0.15 | 0.1  |
| chr12 | 66273280  | 66273868  | Mis18bp1      | ENSMUSG00000047534 | -21  | 0.12 | 0.1  | 0.12 | 0.13 | 0.06 | 0.11 |
| chr12 | 109661140 | 109661779 | Eml1          | ENSMUSG00000058070 | 171  | 0.07 | 0.09 | 0.07 | 0.1  | 0.09 | 0.09 |
| chr12 | 12946480  | 12947111  | Mycn          | ENSMUSG00000037169 | 627  | 0.05 | 0.11 | 0.13 | 0.18 | 0.06 | 0.19 |
| chr12 | 70457759  | 70458191  | Nemf          | ENSMUSG00000020982 | 178  | 0.2  | 0.11 | 0.06 | 0.19 | 0.37 | 0.09 |
| chr12 | 81360324  | 81361786  | Actn1         | ENSMUSG00000015143 | 23   | 0.18 | 0.18 | 0.12 | 0.19 | 0.13 | 0.13 |
| chr12 | 86451587  | 86452364  | Dist          | ENSMUSG00000004789 | 192  | 0.11 | 0.09 | 0.09 | 0.18 | 0.07 | 0.12 |
| chr12 | 112126900 | 112127824 | Cinp          | ENSMUSG00000021276 | -55  | 0.37 | 0.26 | 0.1  | 0.21 | 0.27 | 0.13 |
| chr12 | 112615178 | 112616434 | Cdc42bpb      | ENSMUSG00000021279 | 123  | 0.27 | 0.33 | 0.11 | 0.17 | 0.34 | 0.16 |
| chr12 | 10397532  | 10398007  | Rdh14         | ENSMUSG00000020621 | 183  | 0.27 | 0.35 | 0.15 | 0.2  | 0.18 | 0.13 |
| chr12 | 58646256  | 58647136  | Foxa1         | ENSMUSG00000035451 | 412  | 0.1  | 0.17 | 0.09 | 0.13 | 0.16 | 0.13 |
| chr12 | 76696497  | 76697705  | Ppp2r5e       | ENSMUSG00000021051 | 86   | 0.2  | 0.1  | 0.1  | 0.14 | 0.14 | 0.15 |
| chr12 | 112996837 | 112997559 | Klc1          | ENSMUSG00000021288 | 138  | 0.15 | 0.09 | 0.13 | 0.13 | 0.08 | 0.1  |
| chr12 | 25335845  | 25336771  | Klf11         | ENSMUSG00000020653 | 72   | 0.07 | 0.1  | 0.09 | 0.11 | 0.04 | 0.11 |
| chr12 | 77518478  | 77518886  | Ppp1r36       | ENSMUSG00000052221 | 96   | 0.07 | 0.17 | 0.18 | 0.28 | 0.14 | 0.15 |
| chr12 | 81744316  | 81744876  | Erh           | ENSMUSG00000021131 | 223  | 0.47 | 0.83 | 0.15 | 0.21 | 0.27 | 0.16 |
| chr12 | 104626810 | 104627199 | Otub2         | ENSMUSG00000021203 | 112  | 0.14 | 0.18 | 0.09 | 0.11 | 0.04 | 0.12 |
| chr12 | 85291572  | 85292622  | 2410016O06Rik | ENSMUSG00000046791 | 539  | 0.1  | 0.11 | 0.09 | 0.11 | 0.08 | 0.11 |
| chr12 | 21422613  | 21423799  | Ywhaq         | ENSMUSG00000076432 | -215 | 0.13 | 0.11 | 0.13 | 0.12 | 0.1  | 0.11 |
| chr12 | 85394426  | 85394875  | 4732463B04Rik | ENSMUSG00000086299 | 107  | 0.28 | 0.31 | 0.13 | 0.12 | 0.15 | 0.14 |
| chr12 | 114040521 | 114041032 | Ahnak2        | ENSMUSG00000072812 | 92   | 0.19 | 0.16 | 0.11 | 0.14 | 0.05 | 0.12 |
| chr12 | 4133130   | 4133736   | Adcy3         | ENSMUSG00000020654 | 36   | 0.2  | 0.39 | 0.1  | 0.21 | 0.27 | 0.15 |
| chr12 | 36768617  | 36769133  | Tspan13       | ENSMUSG00000020577 | 201  | 0.08 | 0.17 | 0.09 | 0.13 | 0.2  | 0.08 |
| chr12 | 41172270  | 41173247  | Zfp277        | ENSMUSG00000055917 | -381 | 0.17 | 0.08 | 0.11 | 0.11 | 0.11 | 0.13 |
| chr12 | 81793617  | 81794033  | 3830431G21Rik | ENSMUSG00000066438 | 247  | 0.39 | 0.43 | 0.17 | 0.14 | 0.19 | 0.23 |
| chr12 | 32243928  | 32244788  | Slc26a4       | ENSMUSG00000020651 | 476  | 0.08 | 0.07 | 0.08 | 0.1  | 0.11 | 0.14 |
| chr12 | 54349338  | 54349775  | Npas3         | ENSMUSG00000021010 | -108 | 0.17 | 0.6  | 0.16 | 0.22 | 0.09 | 0.14 |

|       |           |           |               |                     |       |      |      |      |      |      |      |
|-------|-----------|-----------|---------------|---------------------|-------|------|------|------|------|------|------|
| chr12 | 60114362  | 60114666  | Sip1          | ENSMUSG00000060121  | 134   | 0.22 | 0.17 | 0.17 | 0.21 | 0.11 | 0.22 |
| chr12 | 57793431  | 57793681  | Pax9          | ENSMUSG00000001497  | 802   | 0.5  | 0.31 | 0.11 | 0.22 | 0.13 | 0.23 |
| chr12 | 81215362  | 81215585  | Zfp361        | ENSMUSG000000021127 | -1473 | 0.24 | 0.3  | 0.2  | 0.17 | 0.14 | 0.3  |
| chr12 | 3572055   | 3572883   | Dtnb          | ENSMUSG000000071454 | 88    | 0.19 | 0.24 | 0.12 | 0.16 | 0.16 | 0.18 |
| chr12 | 58297698  | 58298149  | Slc25a21      | ENSMUSG000000035472 | 536   | 0.11 | 0.12 | 0.1  | 0.21 | 0.08 | 0.14 |
| chr12 | 74154654  | 74155174  | Six1          | ENSMUSG000000051367 | -40   | 0.26 | 0.13 | 0.15 | 0.17 | 0.1  | 0.25 |
| chr12 | 114252306 | 114253271 | Pacs2         | ENSMUSG000000021143 | 69    | 0.14 | 0.12 | 0.09 | 0.13 | 0.1  | 0.14 |
| chr12 | 32183772  | 32185026  | Cbll1         | ENSMUSG000000020659 | 20    | 0.33 | 0.29 | 0.14 | 0.19 | 0.2  | 0.2  |
| chr12 | 70891513  | 70891786  | Cdkl1         | ENSMUSG000000020990 | 45    | 0.2  | 0.1  | 0.09 | 0.14 | 0.09 | 0.14 |
| chr12 | 71328310  | 71328858  | Pygl          | ENSMUSG000000021069 | -252  | 0.36 | NA   | 0.12 | 0.15 | 0.13 | 0.09 |
| chr12 | 74387467  | 74388062  | Trmt5         | ENSMUSG000000034442 | -66   | 0.18 | 0.22 | 0.1  | 0.15 | 0.12 | 0.15 |
| chr12 | 70462471  | 70462718  | AC157822.1    | ENSMUSG000000092773 | -126  | 0.15 | 0.08 | 0.1  | 0.11 | 0.06 | 0.12 |
| chr12 | 80231651  | 80232094  | Arg2          | ENSMUSG000000021125 | 108   | 0.17 | 0.31 | 0.17 | 0.24 | 0.09 | 0.3  |
| chr12 | 114336934 | 114337212 | Mta1          | ENSMUSG000000021144 | 461   | 0.11 | 0.13 | 0.06 | 0.1  | 0.05 | 0.05 |
| chr12 | 33504685  | 33505876  | Nampt         | ENSMUSG000000020572 | 80    | 0.13 | 0.11 | 0.11 | 0.12 | 0.1  | 0.11 |
| chr12 | 58331265  | 58331911  | Prps113       | ENSMUSG000000079104 | 189   | 0.15 | 0.13 | 0.09 | 0.2  | 0.09 | 0.13 |
| chr12 | 86311528  | 86311922  | 1110018G07Rik | ENSMUSG000000042350 | 49    | 0.14 | 0.21 | 0.1  | 0.2  | 0.08 | 0.14 |
| chr12 | 8214879   | 8215173   | 1110057K04Rik | ENSMUSG000000037669 | 113   | 0.14 | 0.33 | 0.14 | 0.27 | 0.3  | 0.17 |
| chr12 | 81619425  | 81620848  | Galnt1        | ENSMUSG000000021130 | 678   | 0.12 | 0.11 | 0.1  | 0.14 | 0.09 | 0.1  |
| chr12 | 21379093  | 21379920  | Adam17        | ENSMUSG000000052593 | -111  | 0.17 | 0.1  | 0.12 | 0.16 | 0.09 | 0.16 |
| chr12 | 50492288  | 50492683  | 3110039M20Rik | ENSMUSG000000089922 | 839   | 0.14 | 0.12 | 0.11 | 0.17 | 0.08 | 0.17 |
| chr12 | 77634052  | 77634962  | Mir5135       | ENSMUSG000000092738 | -308  | 0.11 | 0.17 | 0.09 | 0.15 | 0.08 | 0.14 |
| chr12 | 114180047 | 114180334 | Nudt14        | ENSMUSG000000002804 | 139   | 1    | 0.12 | 0.06 | 0.2  | 0.13 | 0.11 |
| chr12 | 77356056  | 77356436  | Mthfd1        | ENSMUSG000000021048 | 27    | 0.12 | 0.07 | 0.09 | 0.12 | 0.06 | 0.09 |
| chr12 | 83717734  | 83718715  | Rgs6          | ENSMUSG000000021219 | 312   | 0.22 | 0.28 | 0.15 | 0.21 | 0.14 | 0.19 |
| chr12 | 87423476  | 87423797  | 1700019E19Rik | ENSMUSG000000007867 | 123   | 0.07 | 0.1  | 0.1  | 0.2  | 0.18 | 0.12 |
| chr12 | 100630226 | 100631609 | Foxn3         | ENSMUSG000000033713 | 365   | 0.11 | 0.13 | 0.1  | 0.19 | 0.07 | 0.13 |
| chr12 | 106270307 | 106271314 | Glrx5         | ENSMUSG000000021102 | -89   | 0.12 | 0.09 | 0.12 | 0.14 | 0.08 | 0.17 |
| chr12 | 109565885 | 109566619 | 4930478K11Rik | ENSMUSG000000085954 | -12   | 0.22 | 0.18 | 0.16 | 0.31 | 0.17 | 0.21 |
| chr12 | 72932082  | 72932847  | Daam1         | ENSMUSG000000034574 | 399   | 0.13 | 0.18 | 0.18 | 0.34 | 0.09 | 0.14 |



|       |           |           |               |                    |      |      |      |      |      |      |      |
|-------|-----------|-----------|---------------|--------------------|------|------|------|------|------|------|------|
| chr12 | 82960880  | 82962097  | Pcnx          | ENSMUSG00000021140 | 471  | 0.16 | 0.17 | 0.11 | 0.13 | 0.13 | 0.15 |
| chr12 | 16901214  | 16902320  | Rock2         | ENSMUSG00000020580 | -17  | 0.15 | 0.4  | 0.1  | 0.17 | 0.19 | 0.17 |
| chr12 | 103981568 | 103982260 | Moap1         | ENSMUSG00000091931 | -73  | 0.09 | 0.19 | 0.09 | 0.15 | 0.13 | 0.12 |
| chr12 | 104115648 | 104116865 | Btbd7         | ENSMUSG00000041702 | 360  | 0.08 | 0.07 | 0.07 | 0.09 | 0.06 | 0.12 |
| chr12 | 109544471 | 109544951 | Hhipl1        | ENSMUSG00000021260 | 231  | 0.16 | 0.24 | 0.09 | 0.16 | 0.09 | 0.15 |
| chr12 | 75098618  | 75098987  | Syt16         | ENSMUSG00000044912 | 54   | 0.09 | 0.1  | 0.09 | 0.13 | 0.19 | 0.14 |
| chr12 | 84961851  | 84962112  | Gm17284       | ENSMUSG00000091015 | 821  | 1    | 0.89 | 0.44 | 0.82 | 0.8  | 0.59 |
| chr12 | 93016908  | 93017652  | Ston2         | ENSMUSG00000020961 | 297  | 0.19 | 0.1  | 0.08 | 0.13 | 0.11 | 0.11 |
| chr12 | 104480028 | 104481003 | Prima1        | ENSMUSG00000041669 | -179 | 0.08 | 0.09 | 0.08 | 0.17 | 0.13 | 0.11 |
| chr12 | 113382144 | 113385166 | Kif26a        | ENSMUSG00000021294 | -791 | 0.15 | 0.17 | 0.14 | 0.21 | 0.13 | 0.16 |
| chr12 | 99985014  | 99985633  | Zc3h14        | ENSMUSG00000021012 | 145  | 0.35 | 0.23 | 0.13 | 0.13 | 0.22 | 0.16 |
| chr12 | 111684729 | 111685838 | Ppp2r5c       | ENSMUSG00000017843 | -235 | 0.11 | 0.16 | 0.11 | 0.2  | 0.16 | 0.17 |
| chr12 | 101962849 | 101963791 | Rps6ka5       | ENSMUSG00000021180 | -82  | 0.27 | 0.22 | 0.14 | 0.18 | 0.38 | 0.1  |
| chr12 | 8928386   | 8929442   | Laptm4a       | ENSMUSG00000020585 | 558  | 0.28 | 0.19 | 0.11 | 0.12 | 0.21 | 0.14 |
| chr12 | 17551379  | 17552234  | Odc1          | ENSMUSG00000011179 | 127  | 0.14 | 0.22 | 0.21 | 0.23 | 0.24 | 0.17 |
| chr12 | 73185659  | 73187274  | 2810055F11Rik | ENSMUSG00000019718 | -461 | 0.22 | 0.16 | 0.12 | 0.14 | 0.18 | 0.15 |
| chr12 | 74145602  | 74147861  | Six1          | ENSMUSG00000051367 | -453 | 0.18 | 0.14 | 0.12 | 0.17 | 0.15 | 0.16 |
| chr12 | 85533618  | 85535109  | C130039O16Rik | ENSMUSG00000042507 | 602  | 0.09 | 0.13 | 0.13 | 0.16 | 0.11 | 0.12 |
| chr12 | 4599636   | 4600393   | Gm3625        | ENSMUSG00000091619 | -281 | 0.11 | 0.09 | 0.1  | 0.09 | 0.1  | 0.11 |
| chr12 | 8980594   | 8981068   | Wdr35         | ENSMUSG00000066643 | 133  | 1    | 1    | 0.14 | 0.37 | 0.25 | 0.27 |
| chr12 | 66174458  | 66175208  | Fkbp3         | ENSMUSG00000020949 | 98   | 0.5  | 0.36 | 0.21 | 0.2  | 0.21 | 0.14 |
| chr12 | 110132077 | 110132623 | Wars          | ENSMUSG00000021266 | -39  | 0.22 | 0.3  | 0.12 | 0.21 | 0.16 | 0.11 |
| chr12 | 31058023  | 31058336  | Sntg2         | ENSMUSG00000020672 | -49  | 0.2  | 0.17 | 0.09 | 0.12 | 0.07 | 0.16 |
| chr12 | 81213787  | 81214013  | Zfp361l       | ENSMUSG00000021127 | 85   | 0.61 | 1    | 0.15 | 0.67 | 0.41 | 0.27 |
| chr12 | 102956223 | 102956818 | Tc2n          | ENSMUSG00000021187 | 213  | 0.1  | 0.09 | 0.08 | 0.09 | 0.07 | 0.16 |
| chr12 | 103707173 | 103707796 | Golga5        | ENSMUSG00000021192 | -636 | 0.18 | 0.25 | 0.11 | 0.17 | 0.14 | 0.12 |
| chr12 | 109792870 | 109793633 | Evl           | ENSMUSG00000021262 | 321  | 0.17 | 0.12 | 0.12 | 0.15 | 0.13 | 0.17 |
| chr12 | 85758119  | 85758619  | Rnf113a2      | ENSMUSG00000045546 | 225  | 0.18 | 0.13 | 0.18 | 0.27 | 0.14 | 0.14 |
| chr12 | 86337136  | 86337769  | Ylpm1         | ENSMUSG00000021244 | 181  | 0.05 | 0.09 | 0.06 | 0.18 | 0.06 | 0.13 |
| chr12 | 3309324   | 3310176   | Rab10         | ENSMUSG00000020671 | 219  | 0.19 | 0.22 | 0.15 | 0.16 | 0.16 | 0.15 |

|       |           |           |               |                    |      |      |      |      |      |      |      |
|-------|-----------|-----------|---------------|--------------------|------|------|------|------|------|------|------|
| chr12 | 25515707  | 25517039  | Mboat2        | ENSMUSG00000020646 | -91  | 0.13 | 0.19 | 0.12 | 0.12 | 0.1  | 0.18 |
| chr12 | 85410463  | 85410857  | Acot5         | ENSMUSG00000042540 | 385  | 0.33 | 0.12 | 0.13 | NA   | 0.17 | 0.21 |
| chr12 | 85559327  | 85559887  | C130039O16Rik | ENSMUSG00000042507 | 224  | 0.11 | 0.18 | 0.11 | 0.16 | 0.09 | 0.1  |
| chr12 | 35731434  | 35732542  | Snx13         | ENSMUSG00000020590 | 127  | 0.14 | 0.11 | 0.08 | 0.14 | 0.12 | 0.14 |
| chr12 | 32035768  | 32036391  | Dld           | ENSMUSG00000020664 | 201  | 0.17 | 0.09 | 0.14 | 0.18 | 0.12 | 0.19 |
| chr12 | 80273087  | 80273802  | Vti1b         | ENSMUSG00000021124 | -123 | 0.12 | 0.12 | 0.12 | 0.17 | 0.1  | 0.14 |
| chr12 | 106923052 | 106924034 | Atg2b         | ENSMUSG00000041341 | -92  | 0.22 | 0.3  | 0.12 | 0.18 | 0.18 | 0.16 |
| chr12 | 112078684 | 112079286 | Stk30         | ENSMUSG00000056458 | 152  | 0.17 | 0.08 | 0.09 | 0.13 | 0.12 | 0.15 |
| chr12 | 86216551  | 86217620  | D030025P21Rik | ENSMUSG00000092130 | 366  | 0.13 | 0.45 | 0.1  | 0.16 | 0.18 | 0.16 |
| chr12 | 87087164  | 87087700  | Mfsd7c        | ENSMUSG00000034258 | -57  | 0.18 | 0.09 | 0.17 | 0.12 | 0.25 | 0.23 |
| chr12 | 109240816 | 109241453 | Bcl11b        | ENSMUSG00000048251 | 490  | 0.22 | 0.12 | 0.13 | 0.14 | 0.17 | 0.14 |
| chr12 | 25365494  | 25365981  | Cys1          | ENSMUSG00000062563 | -153 | 0.12 | 0.12 | 0.07 | 0.09 | 0.07 | 0.13 |
| chr12 | 55963284  | 55964187  | Cfl2          | ENSMUSG00000062929 | 129  | 0.1  | 0.1  | 0.1  | 0.13 | 0.15 | 0.13 |
| chr12 | 34114411  | 34114917  | Twistnb       | ENSMUSG00000020561 | 175  | 0.1  | 0.25 | 0.09 | 0.08 | 0.06 | 0.22 |
| chr12 | 73765658  | 73765924  | Dhrs7         | ENSMUSG00000021094 | 24   | 0.11 | 0.06 | 0.05 | 0.08 | 0.07 | 0.14 |
| chr12 | 84973108  | 84973879  | Rbm25         | ENSMUSG00000010608 | 309  | 0.31 | 0.29 | 0.22 | 0.19 | 0.17 | 0.23 |
| chr12 | 3426605   | 3427706   | 1110002L01Rik | ENSMUSG00000071456 | -511 | 0.27 | 0.13 | 0.1  | 0.12 | 0.22 | 0.2  |
| chr12 | 85626112  | 85626471  | Ptgr2         | ENSMUSG00000072946 | 109  | 1    | 0.27 | 0.24 | 0.33 | 0.2  | 0.12 |
| chr12 | 104663705 | 104664287 | Ddx24         | ENSMUSG00000041645 | -6   | 0.29 | 0.2  | 0.22 | 0.18 | 0.19 | 0.16 |
| chr12 | 80190321  | 80190721  | Pigh          | ENSMUSG00000021120 | 99   | 0.18 | 1    | 0.13 | 0.18 | 0.23 | 0.28 |
| chr12 | 88487999  | 88489107  | Gstz1         | ENSMUSG00000021033 | -115 | 0.22 | 0.27 | 0.11 | 0.17 | 0.16 | 0.14 |
| chr12 | 25659761  | 25660136  | Kidins220     | ENSMUSG00000036333 | 151  | 0.53 | 1    | 0.11 | 0.1  | 0.39 | 0.1  |
| chr12 | 55796575  | 55797021  | Eapp          | ENSMUSG00000054302 | 10   | 0.14 | 0.24 | 0.11 | 0.18 | 0.08 | 0.12 |
| chr12 | 99812741  | 99813589  | Kcnk10        | ENSMUSG00000033854 | -243 | 0.11 | 0.13 | 0.07 | 0.11 | 0.08 | 0.13 |
| chr12 | 114378261 | 114379213 | Crip2         | ENSMUSG00000006356 | 290  | 0.43 | 0.2  | 0.11 | 0.14 | 0.28 | 0.19 |
| chr12 | 113882637 | 113883659 | Siva1         | ENSMUSG00000064326 | 109  | 0.18 | 0.09 | 0.1  | 0.1  | 0.11 | 0.12 |
| chr12 | 66066656  | 66067560  | Fam179b       | ENSMUSG00000035614 | 379  | 0.11 | 0.15 | 0.08 | 0.12 | 0.08 | 0.13 |
| chr12 | 82433651  | 82434152  | Slc8a3        | ENSMUSG00000079055 | 266  | 0.1  | 0.09 | 0.07 | 0.18 | 0.07 | 0.1  |
| chr12 | 27154036  | 27154715  | Cmpk2         | ENSMUSG00000020638 | 306  | 0.12 | 0.2  | 0.15 | 0.19 | 0.08 | 0.12 |
| chr12 | 52448978  | 52449498  | G2e3          | ENSMUSG00000035293 | 190  | 0.17 | 0.31 | 0.12 | 0.17 | 0.14 | 0.15 |

|       |           |           |               |                    |      |      |      |      |      |      |      |
|-------|-----------|-----------|---------------|--------------------|------|------|------|------|------|------|------|
| chr12 | 96933397  | 96934086  | Flrt2         | ENSMUSG00000047414 | 174  | 0.17 | 0.14 | 0.1  | 0.12 | 0.11 | 0.16 |
| chr12 | 112908748 | 112910720 | Ckb           | ENSMUSG00000001270 | 815  | 0.16 | 0.2  | 0.15 | 0.2  | 0.18 | 0.18 |
| chr12 | 15821667  | 15824023  | Trib2         | ENSMUSG00000020601 | 746  | 0.14 | 0.13 | 0.1  | 0.18 | 0.12 | 0.15 |
| chr12 | 110030385 | 110032981 | Yy1           | ENSMUSG00000021264 | 500  | 0.16 | 0.12 | 0.1  | 0.11 | 0.14 | 0.13 |
| chr12 | 73861465  | 73862914  | Ppm1a         | ENSMUSG00000021096 | -9   | 0.17 | 0.21 | 0.1  | 0.21 | 0.15 | 0.13 |
| chr12 | 101203413 | 101204466 | Kcnk13        | ENSMUSG00000045404 | 1204 | 0.17 | 0.24 | 0.1  | 0.13 | 0.11 | 0.2  |
| chr12 | 117285952 | 117286216 | Zfp386        | ENSMUSG00000042063 | 149  | 0.09 | 0.13 | 0.08 | 0.12 | 0.07 | 0.12 |
| chr12 | 16807168  | 16807767  | Greb1         | ENSMUSG00000036523 | 23   | 0.15 | 0.65 | 0.15 | 0.15 | 0.1  | 0.13 |
| chr12 | 25392747  | 25393567  | Rrm2          | ENSMUSG00000020649 | 51   | 0.28 | 0.31 | 0.13 | 0.18 | 0.35 | 0.25 |
| chr12 | 36882920  | 36883501  | Bzw2          | ENSMUSG00000020547 | 202  | 0.16 | 0.06 | 0.06 | 0.09 | 0.1  | 0.13 |
| chr12 | 107022550 | 107023516 | Papola        | ENSMUSG00000021111 | 129  | 0.16 | 0.17 | 0.15 | 0.22 | 0.2  | 0.14 |
| chr12 | 114188396 | 114188901 | Gm17274       | ENSMUSG00000090980 | 75   | 0.07 | 0.17 | 0.1  | 0.15 | 0.13 | 0.11 |
| chr12 | 105710127 | 105711621 | Gsc           | ENSMUSG00000021095 | 663  | 0.14 | 0.19 | 0.13 | 0.17 | 0.12 | 0.14 |
| chr12 | 75050636  | 75050979  | Gm15283       | ENSMUSG00000087700 | -35  | 0.15 | 0.13 | 0.06 | 0.08 | 0.08 | 0.17 |
| chr12 | 3365111   | 3365428   | Kif3c         | ENSMUSG00000020668 | 137  | 0.31 | 0.12 | 0.1  | 0.21 | 0.17 | 0.15 |
| chr12 | 12268949  | 12269237  | Fam49a        | ENSMUSG00000020589 | 148  | 0.2  | 0.09 | 0.11 | 0.21 | 0.16 | 0.14 |
| chr12 | 70284570  | 70285971  | Rpl36al       | ENSMUSG00000049751 | -297 | 0.12 | 0.07 | 0.11 | 0.14 | 0.11 | 0.11 |
| chr12 | 72237292  | 72237661  | Timm9         | ENSMUSG00000021079 | 145  | 0.08 | 0.07 | 0.08 | 0.12 | 0.06 | 0.1  |
| chr12 | 52929642  | 52931102  | Hectd1        | ENSMUSG00000035247 | 151  | 0.17 | 0.23 | 0.1  | 0.14 | 0.18 | 0.14 |
| chr12 | 77923072  | 77923752  | Rab15         | ENSMUSG00000021062 | 37   | 0.21 | 0.28 | 0.14 | 0.41 | 0.16 | 0.15 |
| chr12 | 85350455  | 85350900  | Acot1         | ENSMUSG00000072949 | 225  | 0.19 | 0.18 | 0.1  | 0.18 | 0.1  | 0.17 |
| chr12 | 87420319  | 87420638  | Tgfb3         | ENSMUSG00000021253 | -487 | 0.5  | 0.14 | 0.18 | 0.16 | 0.11 | 0.13 |
| chr12 | 119539604 | 119541105 | Sp4           | ENSMUSG00000025323 | -441 | 0.12 | 0.07 | 0.11 | 0.12 | 0.11 | 0.11 |
| chr12 | 34641816  | 34643566  | Twist1        | ENSMUSG00000035799 | 155  | 0.08 | 0.09 | 0.11 | 0.11 | 0.07 | 0.09 |
| chr12 | 112683745 | 112684290 | Tnfaip2       | ENSMUSG00000021281 | -278 | 0.2  | 0.32 | 0.11 | 0.1  | 0.11 | 0.18 |
| chr12 | 113051861 | 113052872 | Xrcc3         | ENSMUSG00000021287 | -314 | 0.15 | 0.13 | 0.1  | 0.15 | 0.13 | 0.15 |
| chr12 | 30622804  | 30623499  | Pxdn          | ENSMUSG00000020674 | 250  | 0.1  | 0.1  | 0.14 | 0.14 | 0.12 | 0.13 |
| chr12 | 117724204 | 117724977 | Ptprn2        | ENSMUSG00000056553 | 381  | 0.5  | 0.18 | 0.08 | 0.22 | 0.12 | 0.13 |
| chr12 | 70782312  | 70783384  | Sos2          | ENSMUSG00000034801 | -9   | 0.13 | 0.17 | 0.13 | 0.18 | 0.11 | 0.16 |
| chr12 | 88287796  | 88288435  | 2310044G17Rik | ENSMUSG00000034157 | -249 | 0.23 | 0.25 | 0.15 | 0.13 | 0.2  | 0.19 |

|       |           |           |               |                    |      |      |      |      |      |      |      |
|-------|-----------|-----------|---------------|--------------------|------|------|------|------|------|------|------|
| chr12 | 101203014 | 101203294 | Kcnk13        | ENSMUSG00000045404 | 419  | 0.23 | 0.22 | 0.21 | 0.17 | 0.29 | 0.14 |
| chr12 | 112812540 | 112813587 | 2810029C07Rik | ENSMUSG00000091750 | -450 | 0.35 | 0.3  | 0.16 | 0.15 | 0.4  | 0.21 |
| chr12 | 88728670  | 88729363  | Sptlc2        | ENSMUSG00000021036 | 175  | 0.26 | 0.19 | 0.19 | 0.14 | 0.29 | 0.14 |
| chr12 | 112723361 | 112724212 | Gm266         | ENSMUSG00000010529 | 248  | 0.14 | 0.13 | 0.09 | 0.1  | 0.11 | 0.14 |
| chr12 | 8304792   | 8305763   | AC122860.1    | ENSMUSG00000093208 | -132 | 0.08 | 0.12 | 0.15 | 0.15 | 0.09 | 0.14 |
| chr12 | 71553877  | 71554354  | Tmx1          | ENSMUSG00000021072 | 33   | 0.27 | 0.25 | 0.11 | 0.13 | 1    | 0.13 |
| chr12 | 88232938  | 88233232  | Gm17422       | ENSMUSG00000091891 | 432  | 0.19 | NA   | 0.09 | 0.21 | 0.13 | 0.13 |
| chr12 | 77425692  | 77426156  | Akap5         | ENSMUSG00000021057 | 46   | 0.16 | 0.33 | 0.08 | 0.25 | 0.24 | 0.12 |
| chr12 | 78338953  | 78340581  | Fut8          | ENSMUSG00000021065 | -285 | 0.15 | 0.15 | 0.1  | 0.16 | 0.18 | 0.12 |
| chr12 | 88540648  | 88541486  | Tmed8         | ENSMUSG00000034111 | 112  | 0.14 | 0.15 | 0.12 | 0.16 | 0.15 | 0.14 |
| chr12 | 111516032 | 111518128 | Dio3os        | ENSMUSG00000090962 | -802 | 0.26 | 0.28 | 0.17 | 0.15 | 0.24 | 0.14 |
| chr12 | 52694074  | 52695017  | Coch          | ENSMUSG00000020953 | 184  | 0.21 | 0.16 | 0.13 | 0.18 | 0.23 | 0.2  |
| chr12 | 85749347  | 85750140  | Entpd5        | ENSMUSG00000021236 | 191  | 0.5  | 0.33 | 0.1  | 0.11 | 0.15 | 0.16 |
| chr12 | 70397604  | 70398422  | Klhdc2        | ENSMUSG00000020978 | 345  | 0.12 | 0.15 | 0.12 | 0.12 | 0.11 | 0.15 |
| chr12 | 107248381 | 107249134 | Vrk1          | ENSMUSG00000021115 | 284  | 0.16 | 0.16 | 0.08 | 0.16 | 0.14 | 0.1  |
| chr12 | 87165644  | 87166185  | Ttll5         | ENSMUSG00000012609 | 257  | 0.12 | 0.09 | 0.07 | 0.1  | 0.07 | 0.19 |
| chr12 | 109416555 | 109418440 | Setd3         | ENSMUSG00000056770 | -74  | 0.11 | 0.08 | 0.09 | 0.18 | 0.09 | 0.12 |
| chr12 | 112775718 | 112777394 | Eif5          | ENSMUSG00000021282 | 244  | 0.12 | 0.13 | 0.1  | 0.12 | 0.13 | 0.13 |
| chr12 | 3891226   | 3891634   | Dnmt3a        | ENSMUSG00000020661 | -298 | 0.36 | 0.5  | 0.1  | 0.25 | 1    | 0.33 |
| chr12 | 71087448  | 71088390  | Sav1          | ENSMUSG00000021067 | 70   | 0.06 | 0.1  | 0.08 | 0.14 | 0.06 | 0.13 |
| chr12 | 78062689  | 78063840  | Max           | ENSMUSG00000059436 | -252 | 0.13 | 0.24 | 0.11 | 0.13 | 0.12 | 0.17 |
| chr12 | 81535941  | 81536724  | Dcaf5         | ENSMUSG00000049106 | 1256 | 0.07 | 0.12 | 0.11 | 0.13 | 0.14 | 0.16 |
| chr12 | 101348254 | 101348783 | Psmc1         | ENSMUSG00000021178 | 122  | 0.19 | 0.14 | 0.1  | 0.12 | 0.15 | 0.12 |
| chr12 | 114047060 | 114047504 | BC022687      | ENSMUSG00000037594 | 96   | 0.52 | 0.66 | 0.15 | 0.17 | 0.47 | 0.14 |
| chr12 | 4038394   | 4039169   | Efr3b         | ENSMUSG00000020658 | 134  | 0.1  | 0.17 | 0.09 | 0.21 | 0.09 | 0.12 |
| chr12 | 17888500  | 17889309  | Gm9222        | ENSMUSG00000091094 | -99  | 0.11 | 0.06 | 0.14 | 0.25 | 0.09 | 0.11 |
| chr12 | 4923822   | 4924907   | Atad2b        | ENSMUSG00000052812 | 154  | 0.15 | 0.2  | 0.11 | 0.16 | 0.14 | 0.16 |
| chr12 | 60167718  | 60168461  | Pnn           | ENSMUSG00000020994 | 183  | 0.08 | 0.1  | 0.09 | 0.14 | 0.09 | 0.15 |
| chr12 | 85657690  | 85658536  | Zfp410        | ENSMUSG00000042472 | 49   | 0.4  | 0.4  | 0.16 | 0.14 | 0.56 | 0.13 |
| chr12 | 16660366  | 16660911  | Ntsr2         | ENSMUSG00000020591 | 358  | 0.06 | 0.08 | 0.06 | 0.08 | 0.04 | 0.07 |

|       |           |           |               |                    |      |      |      |      |      |      |      |
|-------|-----------|-----------|---------------|--------------------|------|------|------|------|------|------|------|
| chr12 | 74212827  | 74214151  | Six4          | ENSMUSG00000034460 | 912  | 0.16 | 0.16 | 0.1  | 0.16 | 0.14 | 0.15 |
| chr12 | 103213566 | 103214545 | Cpsf2         | ENSMUSG00000041781 | -129 | 0.13 | 0.27 | 0.14 | 0.18 | 0.09 | 0.14 |
| chr12 | 50484064  | 50486795  | 3110039M20Rik | ENSMUSG00000089922 | -732 | 0.33 | 0.22 | 0.12 | 0.18 | 0.32 | 0.17 |
| chr12 | 102320653 | 102322284 | D130020L05Rik | ENSMUSG00000042922 | 777  | 0.1  | 0.1  | 0.13 | 0.14 | 0.09 | 0.17 |
| chr12 | 72075515  | 72076211  | Psm3          | ENSMUSG00000060073 | 255  | 0.14 | 0.24 | 0.12 | 0.17 | 0.13 | 0.1  |
| chr12 | 82585645  | 82586182  | Cox16         | ENSMUSG00000091803 | -97  | 1    | 0.1  | 0.18 | 0.12 | 0.33 | 0.14 |
| chr12 | 85441815  | 85442362  | Acot6         | ENSMUSG00000043487 | 484  | 0.12 | 0.14 | 0.11 | 0.12 | 0.07 | 0.11 |
| chr12 | 109571964 | 109572301 | Cyp46a1       | ENSMUSG00000021259 | -455 | 0.14 | 0.06 | 0.09 | 0.13 | 0.04 | 0.14 |
| chr12 | 70472758  | 70474123  | Arf6          | ENSMUSG00000044147 | 303  | 0.14 | 0.16 | 0.12 | 0.18 | 0.15 | 0.13 |
| chr12 | 81537437  | 81537943  | Dcaf5         | ENSMUSG00000049106 | -102 | 0.09 | 0.08 | 0.1  | 0.07 | 0.08 | 0.09 |
| chr12 | 82881384  | 82882567  | Map3k9        | ENSMUSG00000042724 | 182  | 0.1  | 0.11 | 0.06 | 0.12 | 0.1  | 0.13 |
| chr12 | 101122644 | 101123065 | Tdp1          | ENSMUSG00000021177 | 127  | 0.11 | 0.41 | 0.09 | 0.14 | 0.25 | 0.11 |
| chr12 | 117501285 | 117501570 | Wdr60         | ENSMUSG00000042050 | 71   | 0.03 | 0.05 | 0.1  | 0.07 | 0.05 | 0.08 |
| chr12 | 117519112 | 117520324 | Esyt2         | ENSMUSG00000021171 | 23   | 0.15 | 0.14 | 0.12 | 0.18 | 0.16 | 0.14 |
| chr12 | 4082493   | 4082922   | Dnajc27       | ENSMUSG00000020657 | 95   | 0.17 | 0.16 | 0.17 | 0.15 | 0.21 | 0.13 |
| chr12 | 71212215  | 71213200  | Nin           | ENSMUSG00000021068 | 200  | 0.1  | 0.08 | 0.14 | 0.13 | 0.11 | 0.13 |
| chr12 | 103366917 | 103367681 | Slc24a4       | ENSMUSG00000041771 | 356  | 0.13 | 0.13 | 0.09 | 0.15 | 0.19 | 0.22 |
| chr12 | 17331261  | 17331650  | Atp6v1c2      | ENSMUSG00000020566 | 16   | 0.19 | 0.11 | 0.13 | 0.2  | 0.22 | 0.15 |
| chr12 | 33638669  | 33639663  | Sypl          | ENSMUSG00000020570 | 410  | 0.27 | 0.28 | 0.12 | 0.18 | 0.26 | 0.16 |
| chr12 | 71926455  | 71927018  | Frmf6         | ENSMUSG00000048285 | 235  | 0.24 | 0.09 | 0.11 | 0.18 | 0.22 | 0.11 |
| chr12 | 109241987 | 109242560 | Bcl11b        | ENSMUSG00000048251 | -461 | 0.13 | 0.12 | 0.12 | 0.12 | 0.12 | 0.11 |
| chr12 | 32634104  | 32635229  | Hbp1          | ENSMUSG00000002996 | -193 | 0.36 | 0.31 | 0.11 | 0.27 | 0.35 | 0.15 |
| chr12 | 70328858  | 70329183  | Pole2         | ENSMUSG00000020974 | 157  | 0.06 | 0.08 | 0.11 | 0.17 | 0.08 | 0.13 |
| chr12 | 28026051  | 28028326  | Sox11         | ENSMUSG00000063632 | 386  | 0.1  | 0.11 | 0.11 | 0.11 | 0.1  | 0.15 |
| chr12 | 45429627  | 45430676  | Nrcam         | ENSMUSG00000020598 | 279  | 0.11 | 0.09 | 0.11 | 0.16 | 0.11 | 0.13 |
| chr12 | 101425217 | 101425830 | Gm10433       | ENSMUSG00000072884 | -655 | 0.14 | 0.2  | 0.18 | 0.2  | 0.12 | 0.2  |
| chr12 | 4850019   | 4850239   | BC068281      | ENSMUSG00000051721 | 20   | 1    | NA   | 0.25 | 0.5  | 1    | 0.48 |
| chr12 | 8505779   | 8507252   | Rhob          | ENSMUSG00000054364 | 276  | 0.14 | 0.1  | 0.08 | 0.17 | 0.14 | 0.14 |
| chr12 | 9581251   | 9581594   | Osr1          | ENSMUSG00000048387 | 174  | 0.11 | NA   | 0.17 | 0.34 | 0.13 | 0.19 |
| chr12 | 16817643  | 16818210  | E2f6          | ENSMUSG00000057469 | 155  | 0.11 | 0.35 | 0.16 | 0.12 | 0.11 | 0.12 |

|       |          |          |               |                    |      |      |      |      |      |      |      |
|-------|----------|----------|---------------|--------------------|------|------|------|------|------|------|------|
| chr12 | 17355107 | 17355461 | Nof10         | ENSMUSG00000061458 | -1   | 0.12 | 0.06 | 0.07 | 0.13 | 0.07 | 0.09 |
| chr12 | 17697436 | 17698342 | Hpcal1        | ENSMUSG00000071379 | 269  | 0.21 | 0.2  | 0.12 | 0.2  | 0.2  | 0.15 |
| chr12 | 21291752 | 21292487 | Itgb1bp1      | ENSMUSG00000062352 | -161 | 0.1  | 0.21 | 0.08 | 0.15 | 0.11 | 0.11 |
| chr12 | 29360011 | 29360454 | Adi1          | ENSMUSG00000020629 | 136  | 0.08 | 0.08 | 0.07 | 0.06 | 0.1  | 0.09 |
| chr12 | 31758760 | 31759237 | Fam110c       | ENSMUSG00000036136 | 165  | 0.1  | 0.23 | 0.13 | 0.21 | 0.1  | 0.21 |
| chr12 | 32339479 | 32340143 | Dus4l         | ENSMUSG00000020648 | -120 | 0.07 | 0.24 | 0.11 | 0.17 | 0.07 | 0.12 |
| chr12 | 36219177 | 36219670 | Ahr           | ENSMUSG00000019256 | -128 | 0.15 | 0.15 | 0.08 | 0.1  | 0.15 | 0.12 |
| chr12 | 39505227 | 39505701 | Etv1          | ENSMUSG00000004151 | -503 | 1    | 0.23 | 0.11 | 0.42 | 0.5  | 0.21 |
| chr12 | 53198688 | 53198926 | Nubpl         | ENSMUSG00000035142 | 83   | 0.25 | 0.42 | 0.13 | 0.19 | 0.12 | 0.12 |
| chr12 | 56593123 | 56593653 | Nfkbia        | ENSMUSG00000021025 | 246  | 0.1  | 0.08 | 0.07 | 0.11 | 0.11 | 0.13 |
| chr12 | 57446464 | 57446884 | Mbip          | ENSMUSG00000021028 | 207  | 0.17 | 0.33 | 0.33 | 0.09 | 0.14 | 0.08 |
| chr12 | 57792481 | 57792790 | Pax9          | ENSMUSG00000001497 | -119 | 0.05 | 0.07 | 0.08 | 0.14 | 0.07 | 0.09 |
| chr12 | 60162049 | 60162379 | Trappc6b      | ENSMUSG00000020993 | 234  | 0.1  | 0.09 | 0.08 | 0.1  | 0.11 | 0.14 |
| chr12 | 66326680 | 66327007 | Wdr20b        | ENSMUSG00000035560 | 339  | 1    | 1    | 0.99 | 0.94 | 1    | 0.99 |
| chr12 | 67384859 | 67385387 | Rpl10l        | ENSMUSG00000060499 | 265  | 0.97 | 0.97 | 0.97 | 1    | 0.97 | 0.98 |
| chr12 | 70342744 | 70343215 | Klhdc1        | ENSMUSG00000051890 | 160  | 0.67 | NA   | 0.13 | 0.15 | 1    | 0.3  |
| chr12 | 70825466 | 70826193 | L2hgdh        | ENSMUSG00000020988 | 32   | 0.15 | 0.12 | 0.14 | 0.21 | 0.15 | 0.15 |
| chr12 | 71447484 | 71448707 | Trim9         | ENSMUSG00000021071 | 506  | 0.15 | 0.35 | 0.15 | 0.15 | 0.14 | 0.21 |
| chr12 | 72038723 | 72039144 | Actr10        | ENSMUSG00000021076 | 89   | 0.08 | 0.11 | 0.11 | 0.15 | 0.08 | 0.21 |
| chr12 | 72410555 | 72411443 | Dact1         | ENSMUSG00000044548 | 128  | 0.16 | 0.12 | 0.11 | 0.15 | 0.16 | 0.14 |
| chr12 | 73337454 | 73337954 | Rtn1          | ENSMUSG00000021087 | -31  | 0.08 | 0.06 | 0.07 | 0.09 | 0.1  | 0.09 |
| chr12 | 73637057 | 73637516 | 1810048J11Rik | ENSMUSG00000034501 | -58  | 0.09 | 0.16 | 0.15 | 0.12 | 0.06 | 0.2  |
| chr12 | 74040648 | 74041473 | Six6          | ENSMUSG00000021099 | 349  | 0.33 | 0.29 | 0.15 | 0.15 | 0.31 | 0.18 |
| chr12 | 74646275 | 74647543 | Tmem30b       | ENSMUSG00000034435 | 473  | 0.08 | 0.12 | 0.13 | 0.18 | 0.08 | 0.15 |
| chr12 | 80007796 | 80008147 | Plek2         | ENSMUSG00000021118 | -20  | 0.1  | 0.14 | 0.06 | 0.11 | 0.1  | 0.08 |
| chr12 | 80129995 | 80130548 | Plekhh1       | ENSMUSG00000060716 | 121  | 0.13 | 0.12 | 0.09 | 0.17 | 0.12 | 0.12 |
| chr12 | 81564080 | 81564698 | Exd2          | ENSMUSG00000032705 | 307  | 0.17 | 0.3  | 0.13 | 0.22 | 0.17 | 0.19 |
| chr12 | 82732244 | 82732938 | Ttc9          | ENSMUSG00000042734 | 235  | 0.09 | 0.11 | 0.08 | 0.18 | 0.1  | 0.16 |
| chr12 | 84937779 | 84938385 | Zfyve1        | ENSMUSG00000042628 | 15   | 0.06 | 0.13 | 0.1  | 0.18 | 0.07 | 0.1  |
| chr12 | 85328820 | 85329415 | Acot2         | ENSMUSG00000021226 | 306  | 0.15 | 1    | 0.12 | 0.64 | 0.14 | 0.14 |

|       |           |           |               |                    |       |      |      |      |      |      |      |
|-------|-----------|-----------|---------------|--------------------|-------|------|------|------|------|------|------|
| chr12 | 85379384  | 85379901  | Acot4         | ENSMUSG00000052392 | -15   | 0.5  | 0.17 | 0.14 | 0.11 | 0.23 | 0.15 |
| chr12 | 85455191  | 85455549  | Dnalc1        | ENSMUSG00000042523 | 92    | 0.14 | 0.11 | 0.15 | 0.18 | 0.16 | 0.18 |
| chr12 | 86113985  | 86114704  | Npc2          | ENSMUSG00000021242 | -282  | 0.27 | 0.5  | 0.14 | 0.41 | 0.23 | 0.25 |
| chr12 | 86813006  | 86813324  | Fos           | ENSMUSG00000021250 | -1675 | 0.33 | 0.67 | 0.08 | 0.15 | 0.5  | 0.09 |
| chr12 | 88330907  | 88331503  | Zdhhc22       | ENSMUSG00000048483 | -1579 | 0.16 | 0.25 | 0.12 | 0.14 | 0.16 | 0.13 |
| chr12 | 88640348  | 88641280  | Ism2          | ENSMUSG00000050671 | -159  | 0.11 | 0.18 | 0.12 | 0.21 | 0.1  | 0.15 |
| chr12 | 88784343  | 88784975  | Alkbh1        | ENSMUSG00000079036 | 117   | 0.13 | 0.2  | 0.11 | 0.24 | 0.15 | 0.14 |
| chr12 | 92826676  | 92827066  | Gtf2a1        | ENSMUSG00000020962 | 1208  | 0.13 | 0.2  | 0.13 | 0.15 | 0.11 | 0.16 |
| chr12 | 99866247  | 99866559  | Spata7        | ENSMUSG00000021007 | 36    | 0.11 | NA   | 0.09 | 0.16 | 0.14 | 0.16 |
| chr12 | 100801609 | 100802001 | Gm16956       | ENSMUSG00000085349 | -246  | 0.13 | 0.08 | 0.11 | 0.14 | 0.13 | 0.14 |
| chr12 | 103056970 | 103057514 | Fbln5         | ENSMUSG00000021186 | 23    | 0.24 | 1    | 0.18 | 0.3  | 0.23 | 0.14 |
| chr12 | 103196088 | 103196622 | Atxn3         | ENSMUSG00000021189 | 3     | 0.12 | 0.13 | 0.1  | 0.15 | 0.07 | 0.18 |
| chr12 | 103677811 | 103678106 | Lgmn          | ENSMUSG00000021190 | 65    | 0.11 | 0.09 | 0.06 | 0.1  | 0.09 | 0.18 |
| chr12 | 104770383 | 104771044 | Ppp4r4        | ENSMUSG00000021209 | -62   | 0.1  | 0.11 | 0.09 | 0.14 | 0.11 | 0.08 |
| chr12 | 105712635 | 105712876 | Gm10000       | ENSMUSG00000056606 | 57    | 0.5  | 0.17 | 0.15 | 0.24 | 0.33 | 0.15 |
| chr12 | 106247763 | 106248404 | 4831426119Rik | ENSMUSG00000054150 | -64   | 0.2  | 0.3  | 0.16 | 0.18 | 0.2  | 0.12 |
| chr12 | 109512526 | 109514792 | Ccdc85c       | ENSMUSG00000084883 | -32   | 0.09 | 0.14 | 0.09 | 0.13 | 0.09 | 0.12 |
| chr12 | 112215195 | 112215720 | Ankrd9        | ENSMUSG00000037904 | 1008  | 0.94 | 0.95 | 0.91 | 0.94 | 0.94 | 0.96 |
| chr12 | 113826993 | 113827255 | Inf2          | ENSMUSG00000037679 | 129   | 0.14 | 0.19 | 0.09 | 0.12 | 0.11 | 0.12 |
| chr12 | 114238077 | 114239147 | Brf1          | ENSMUSG00000011158 | 220   | 0.1  | 0.08 | 0.12 | 0.12 | 0.1  | 0.12 |
| chr12 | 117316155 | 117316454 | Vipr2         | ENSMUSG00000011171 | 108   | 0.07 | 0.04 | 0.06 | 0.07 | 0.09 | 0.08 |
| chr12 | 119436977 | 119437498 | Dnahc11       | ENSMUSG00000018581 | 279   | 0.1  | 0.13 | 0.06 | 0.09 | 0.1  | 0.1  |
| chr12 | 4881034   | 4881264   | Mfsd2b        | ENSMUSG00000037336 | 2     | NA   | NA   | 0.08 | 0.11 | 0.06 | 0.1  |
| chr12 | 9036727   | 9037309   | Ttc32         | ENSMUSG00000066637 | 215   | NA   | NA   | 0.04 | 0.2  | NA   | 0.21 |
| chr12 | 11156938  | 11157346  | Kcns3         | ENSMUSG00000043673 | 37    | NA   | 0.38 | 0.1  | 0.23 | 0.2  | 0.14 |
| chr12 | 11443248  | 11443546  | Vsnl1         | ENSMUSG00000054459 | 58    | NA   | NA   | NA   | 1    | NA   | NA   |
| chr12 | 11462566  | 11463051  | Rad51ap2      | ENSMUSG00000086022 | -77   | NA   | NA   | 0.26 | NA   | 0.33 | 0.26 |
| chr12 | 12918802  | 12919130  | Rpl36-ps3     | ENSMUSG00000066629 | 174   | NA   | NA   | 0.97 | 1    | NA   | 0.97 |
| chr12 | 14158613  | 14159159  | Fam84a        | ENSMUSG00000020607 | -42   | NA   | NA   | 0.19 | 1    | 0.2  | 0.1  |
| chr12 | 22323811  | 22324511  | Gm9285        | ENSMUSG00000092378 | 249   | NA   | NA   | 0.83 | 1    | NA   | NA   |

|       |          |          |               |                    |      |      |      |      |      |      |      |
|-------|----------|----------|---------------|--------------------|------|------|------|------|------|------|------|
| chr12 | 23377291 | 23378410 | Gm17391       | ENSMUSG00000090923 | -3   | 1    | 1    | 0.56 | 0.71 | NA   | 0.29 |
| chr12 | 23533719 | 23534530 | Gm20533       | ENSMUSG00000090370 | 190  | NA   | 1    | 0.86 | 0.94 | 1    | NA   |
| chr12 | 23979043 | 23979854 | Gm10476       | ENSMUSG00000078374 | -98  | NA   | NA   | 0.81 | NA   | 0.38 | NA   |
| chr12 | 24111634 | 24112334 | Gm4437        | ENSMUSG00000092445 | 250  | 1    | NA   | 1    | 1    | NA   | 1    |
| chr12 | 25183420 | 25183710 | Taf1b         | ENSMUSG00000059669 | 119  | NA   | 0.43 | 0.1  | 0.18 | 0.14 | 0.12 |
| chr12 | 25780779 | 25781392 | Id2           | ENSMUSG00000020644 | -128 | NA   | 0.14 | 0.11 | 0.14 | 0.09 | 0.11 |
| chr12 | 29435068 | 29435389 | Ttc15         | ENSMUSG00000020628 | 90   | NA   | 0.07 | 0.15 | 0.17 | 0.06 | 0.19 |
| chr12 | 29436656 | 29436898 | Tssc1         | ENSMUSG00000036613 | 84   | NA   | 0.83 | 0.11 | 0.12 | 0.17 | 0.19 |
| chr12 | 31269256 | 31269612 | Tmem18        | ENSMUSG00000043061 | 126  | NA   | NA   | 0.14 | 0.23 | 0.34 | 0.17 |
| chr12 | 31596340 | 31597158 | Acp1          | ENSMUSG00000044573 | -272 | 1    | NA   | NA   | NA   | NA   | 1    |
| chr12 | 40860658 | 40860863 | Scin          | ENSMUSG00000002565 | 10   | NA   | 0.33 | 0.14 | 0.21 | 0.24 | 0.23 |
| chr12 | 41750724 | 41751056 | Immp2l        | ENSMUSG00000056899 | -26  | NA   | 0.52 | 0.09 | 0.08 | 0.08 | 0.18 |
| chr12 | 52478333 | 52478609 | Scfd1         | ENSMUSG00000020952 | -96  | NA   | 0.08 | 0.08 | 0.06 | 0.22 | 0.13 |
| chr12 | 53107328 | 53107570 | 6530401N04Rik | ENSMUSG00000020956 | 39   | 0.24 | 0.15 | 0.07 | 0.08 | NA   | 0.18 |
| chr12 | 55896239 | 55896687 | Snx6          | ENSMUSG00000005656 | 227  | NA   | 1    | NA   | NA   | NA   | 0.5  |
| chr12 | 56180995 | 56181822 | 2700097O09Rik | ENSMUSG00000062198 | -313 | 1    | 0.2  | 0.11 | 0.17 | NA   | 0.13 |
| chr12 | 56403590 | 56404115 | 1110008L16Rik | ENSMUSG00000021023 | 228  | NA   | NA   | 0.14 | 0.12 | NA   | 0.14 |
| chr12 | 57797481 | 57798268 | Pax9          | ENSMUSG00000001497 | 1158 | NA   | 0.24 | 0.18 | 0.24 | 0.26 | 0.15 |
| chr12 | 59314460 | 59314770 | Sstr1         | ENSMUSG00000035431 | 1824 | NA   | 0.54 | 0.17 | 0.18 | 0.25 | 0.21 |
| chr12 | 70259606 | 70260278 | Rps29         | ENSMUSG00000034892 | 99   | NA   | NA   | NA   | 1    | NA   | NA   |
| chr12 | 70269481 | 70270154 | Lrr1          | ENSMUSG00000034883 | 16   | NA   | 0.56 | 0.17 | 0.27 | NA   | 0.18 |
| chr12 | 72212358 | 72212644 | Tomm20l       | ENSMUSG00000021078 | 86   | NA   | 0.67 | 0.28 | NA   | 1    | 1    |
| chr12 | 76770320 | 76770885 | Wdr89         | ENSMUSG00000045690 | -113 | NA   | 0.62 | 0.12 | 0.16 | 0.29 | 0.11 |
| chr12 | 77253494 | 77253749 | Gm7862        | ENSMUSG00000046580 | -7   | NA   | 1    | NA   | NA   | NA   | 1    |
| chr12 | 77866436 | 77866673 | Churc1        | ENSMUSG00000090258 | 29   | NA   | 0.11 | 0.13 | 0.27 | 0.29 | 0.17 |
| chr12 | 77938874 | 77938814 | Fntb          | ENSMUSG00000033373 | 193  | NA   | 0.19 | 0.09 | 0.23 | 0.23 | 0.1  |
| chr12 | 82633326 | 82633914 | Gm20498       | ENSMUSG00000021139 | 128  | NA   | 1    | 0.11 | 0.07 | 0.27 | 0.16 |
| chr12 | 82695928 | 82696242 | Med6          | ENSMUSG00000002679 | -140 | NA   | 0.22 | 0.1  | 0.08 | 0.05 | 0.14 |
| chr12 | 84861300 | 84861726 | Dcaf4         | ENSMUSG00000021222 | 97   | NA   | 0.38 | 0.13 | 0.17 | 0.06 | 0.28 |
| chr12 | 85791644 | 85791979 | Aldh6a1       | ENSMUSG00000021238 | 89   | NA   | 0.25 | 0.11 | 0.17 | 1    | 0.19 |



|       |           |           |               |                     |      |      |      |      |      |      |      |
|-------|-----------|-----------|---------------|---------------------|------|------|------|------|------|------|------|
| chr12 | 85958192  | 85958439  | Abcd4         | ENSMUSG00000021240  | 48   | NA   | 0.11 | 0.11 | 0.13 | 0.24 | 0.12 |
| chr12 | 86621152  | 86621424  | Acyp1         | ENSMUSG00000008822  | -32  | 0.5  | 1    | 0.16 | 0.06 | NA   | 0.26 |
| chr12 | 86629528  | 86629743  | Fam164c       | ENSMUSG00000045064  | 94   | NA   | NA   | 0.16 | 0.33 | NA   | 0.24 |
| chr12 | 88019400  | 88020130  | Vash1         | ENSMUSG00000021256  | 115  | 0.95 | 0.4  | 0.06 | 0.11 | NA   | 0.19 |
| chr12 | 88288820  | 88289030  | 2310044G17Rik | ENSMUSG000000034157 | 561  | NA   | 0.2  | 0.11 | 0.11 | 0.23 | 0.16 |
| chr12 | 88443063  | 88443537  | Ngb           | ENSMUSG00000021032  | 0    | NA   | 0.3  | 0.12 | 0.26 | 0.12 | 0.14 |
| chr12 | 88607557  | 88607855  | Ahsa1         | ENSMUSG00000021037  | 10   | NA   | NA   | 0.07 | 1    | NA   | NA   |
| chr12 | 88812822  | 88813319  | Snw1          | ENSMUSG00000021039  | 179  | NA   | 0.5  | 0.23 | 0.18 | 0.11 | 0.16 |
| chr12 | 93087254  | 93087488  | Sel1l         | ENSMUSG00000020964  | 198  | NA   | NA   | 0.09 | 0.12 | 0.1  | 0.12 |
| chr12 | 101121469 | 101121809 | 2610021K21Rik | ENSMUSG00000021176  | 13   | NA   | NA   | NA   | NA   | 1    | NA   |
| chr12 | 102146258 | 102146461 | Gpr68         | ENSMUSG000000047415 | 32   | NA   | 0.33 | 0.11 | 0.33 | 0.75 | 0.17 |
| chr12 | 103150797 | 103151518 | Trip11        | ENSMUSG00000021188  | 176  | NA   | 0.12 | 0.13 | 0.14 | 0.08 | 0.15 |
| chr12 | 109940058 | 109940808 | Degs2         | ENSMUSG00000021263  | 83   | NA   | 1    | 0.23 | 0.15 | NA   | 0.25 |
| chr12 | 111933936 | 111935020 | Hsp90aa1      | ENSMUSG00000021270  | -317 | NA   | 0.08 | 0.12 | 0.17 | 0.1  | 0.13 |
| chr12 | 112082042 | 112082289 | Gm17712       | ENSMUSG00000092102  | 1261 | NA   | 0.18 | 0.15 | 0.2  | 0.25 | 0.2  |
| chr12 | 112083109 | 112083313 | Gm17712       | ENSMUSG00000092102  | 215  | NA   | 0.5  | 0.08 | 0.63 | NA   | 0.28 |
| chr12 | 112667800 | 112668007 | Gm10425       | ENSMUSG00000072830  | 1254 | NA   | NA   | NA   | NA   | NA   | 1    |
| chr12 | 112916071 | 112916508 | Trmt61a       | ENSMUSG00000060950  | -27  | 0.08 | 1    | 0.12 | 0.15 | NA   | 0.13 |
| chr12 | 113858114 | 113858591 | Adssl1        | ENSMUSG00000011148  | 94   | NA   | 1    | 0.13 | 0.5  | 0.5  | 0.21 |
| chr12 | 114214625 | 114215189 | Btbd6         | ENSMUSG00000002803  | 214  | NA   | 0.25 | 0.15 | 0.14 | 0.16 | 0.16 |
| chr12 | 114390141 | 114390448 | Crip1         | ENSMUSG00000006360  | 71   | NA   | 0.27 | 0.08 | 0.11 | NA   | 0.17 |
| chr12 | 120476259 | 120476575 | Itgb8         | ENSMUSG00000025321  | 826  | 0.5  | 0.5  | 0.15 | 0.21 | NA   | 0.08 |
| chr13 | 91363398  | 91363894  | Atg10         | ENSMUSG00000021619  | -54  | 0.74 | 0.2  | 0.11 | 0.18 | 0.15 | 0.14 |
| chr13 | 35085601  | 35086025  | Eci2          | ENSMUSG00000021417  | 178  | 0.39 | 0.19 | 0.14 | 0.18 | 0.08 | 0.13 |
| chr13 | 55614142  | 55614896  | Pdlim7        | ENSMUSG00000021493  | 263  | 0.12 | 0.07 | 0.11 | 0.15 | 0.61 | 0.11 |
| chr13 | 113590889 | 113591617 | Ppap2a        | ENSMUSG00000021759  | 151  | 0.39 | 0.18 | 0.1  | 0.19 | 0.11 | 0.15 |
| chr13 | 23775464  | 23776455  | Hist1h2ac     | ENSMUSG00000069270  | -142 | 0.13 | 1    | 0.06 | 0.06 | 1    | 0.11 |
| chr13 | 78337499  | 78339015  | Gm8327        | ENSMUSG00000086982  | -742 | 0.42 | 0.27 | 0.11 | 0.15 | 0.19 | 0.13 |
| chr13 | 101321587 | 101322794 | Ocln          | ENSMUSG00000021638  | 225  | 0.35 | 0.22 | 0.14 | 0.23 | 0.09 | 0.18 |
| chr13 | 59657998  | 59659065  | Agtppb1       | ENSMUSG00000021557  | -251 | 0.17 | 0.14 | 0.11 | 0.14 | 0.06 | 0.14 |

|       |           |           |          |                    |      |      |      |      |      |      |      |
|-------|-----------|-----------|----------|--------------------|------|------|------|------|------|------|------|
| chr13 | 56236114  | 56237144  | H2afy    | ENSMUSG00000015937 | -443 | 0.21 | 0.17 | 0.12 | 0.12 | 0.09 | 0.13 |
| chr13 | 51195786  | 51196957  | Spin1    | ENSMUSG00000021395 | 104  | 0.18 | 0.2  | 0.08 | 0.19 | 0.07 | 0.12 |
| chr13 | 58909273  | 58910130  | Ntrk2    | ENSMUSG00000055254 | -351 | 0.68 | 1    | 0.08 | 0.11 | 0.13 | 0.13 |
| chr13 | 52678199  | 52678934  | Syk      | ENSMUSG00000021457 | 24   | 0.25 | 0.14 | 0.12 | 0.2  | 0.12 | 0.17 |
| chr13 | 47024717  | 47025984  | Kif13a   | ENSMUSG00000021375 | -263 | 0.32 | 0.29 | 0.14 | 0.16 | 0.13 | 0.18 |
| chr13 | 47217888  | 47218564  | Rnf144b  | ENSMUSG00000038068 | 137  | 1    | 0.14 | 0.13 | 0.17 | 0.05 | 0.11 |
| chr13 | 34129439  | 34129754  | Bphl     | ENSMUSG00000038286 | 94   | 0.31 | 0.16 | 0.07 | 0.15 | 0.07 | 0.09 |
| chr13 | 73901020  | 73901414  | Slc12a7  | ENSMUSG00000017756 | 72   | 0.66 | 0.14 | 0.15 | 0.19 | 0.32 | 0.18 |
| chr13 | 96094929  | 96095587  | Zbed3    | ENSMUSG00000041995 | 66   | 0.69 | 0.55 | 0.11 | 0.14 | 0.15 | 0.16 |
| chr13 | 3536822   | 3537842   | Gdi2     | ENSMUSG00000021218 | 11   | 0.41 | 0.14 | 0.08 | 0.18 | 0.07 | 0.2  |
| chr13 | 24730603  | 24730818  | Fam65b   | ENSMUSG00000036006 | 128  | 0.33 | 0.08 | 0.11 | 0.12 | 0.05 | 0.13 |
| chr13 | 53380723  | 53381675  | Ror2     | ENSMUSG00000021464 | -281 | 0.35 | 0.16 | 0.1  | 0.12 | 0.16 | 0.12 |
| chr13 | 94268218  | 94269744  | Jmy      | ENSMUSG00000021690 | 663  | 0.17 | 0.19 | 0.1  | 0.18 | 0.09 | 0.13 |
| chr13 | 41345026  | 41345854  | BC024659 | ENSMUSG00000091264 | 211  | 0.28 | 0.19 | 0.1  | 0.17 | 0.09 | 0.11 |
| chr13 | 112476018 | 112477969 | Mier3    | ENSMUSG00000032727 | 607  | 0.17 | 0.13 | 0.12 | 0.14 | 0.09 | 0.15 |
| chr13 | 75844694  | 75846067  | Eil2     | ENSMUSG00000001542 | 448  | 0.2  | 0.16 | 0.09 | 0.16 | 0.05 | 0.17 |
| chr13 | 60703122  | 60704014  | Dapk1    | ENSMUSG00000021559 | 260  | 0.27 | 0.2  | 0.09 | 0.14 | 0.1  | 0.13 |
| chr13 | 37917782  | 37919735  | Rreb1    | ENSMUSG00000039087 | 914  | 0.18 | 0.14 | 0.12 | 0.21 | 0.11 | 0.19 |
| chr13 | 31899051  | 31900642  | Foxc1    | ENSMUSG00000050295 | 1331 | 0.28 | 0.13 | 0.13 | 0.19 | 0.14 | 0.14 |
| chr13 | 13682515  | 13683271  | Lyst     | ENSMUSG00000019726 | 217  | 0.6  | 0.28 | 0.14 | 0.17 | 0.21 | 0.11 |
| chr13 | 54794940  | 54795760  | Rnf44    | ENSMUSG00000034928 | -177 | 0.28 | 0.14 | 0.1  | 0.15 | 0.1  | 0.16 |
| chr13 | 107737078 | 107737618 | Dimt1    | ENSMUSG00000021692 | 139  | 0.69 | 0.38 | 0.17 | 0.23 | 0.21 | 0.23 |
| chr13 | 38296697  | 38297272  | Snrnp48  | ENSMUSG00000021431 | 176  | 0.2  | 0.06 | 0.14 | 0.17 | 0.06 | 0.18 |
| chr13 | 91599989  | 91601824  | Ssbp2    | ENSMUSG00000003992 | 251  | 0.17 | 0.12 | 0.1  | 0.14 | 0.09 | 0.16 |
| chr13 | 54850674  | 54851396  | Gprin1   | ENSMUSG00000069227 | -5   | 0.21 | 0.11 | 0.09 | 0.15 | 0.09 | 0.12 |
| chr13 | 51662360  | 51663105  | Shc3     | ENSMUSG00000021448 | -279 | 0.21 | 0.2  | 0.1  | 0.15 | 0.08 | 0.12 |
| chr13 | 90229140  | 90229637  | Xrcc4    | ENSMUSG00000021615 | -247 | 0.32 | 0.38 | 0.09 | 0.16 | 0.06 | 0.13 |
| chr13 | 107811763 | 107812795 | Kif2a    | ENSMUSG00000021693 | -450 | 0.32 | 0.23 | 0.13 | 0.15 | 0.16 | 0.18 |
| chr13 | 51941026  | 51943111  | Gadd45g  | ENSMUSG00000021453 | 21   | 0.43 | 0.17 | 0.11 | 0.14 | 0.2  | 0.2  |
| chr13 | 23852719  | 23854216  | Hist1h4a | ENSMUSG00000060093 | -368 | 0.33 | 0.28 | 0.09 | 0.11 | 0.12 | 0.13 |

|       |           |           |               |                    |      |      |      |      |      |      |      |
|-------|-----------|-----------|---------------|--------------------|------|------|------|------|------|------|------|
| chr13 | 117099768 | 117100473 | Isl1          | ENSMUSG00000042258 | -238 | 0.23 | 0.25 | 0.1  | 0.16 | 0.08 | 0.12 |
| chr13 | 104123960 | 104124996 | Mast4         | ENSMUSG00000034751 | -206 | 0.14 | 0.12 | 0.15 | 0.15 | 0.28 | 0.14 |
| chr13 | 100670409 | 100670850 | Cartpt        | ENSMUSG00000021647 | 9    | 0.33 | 0.07 | 0.07 | 0.17 | 0.05 | 0.17 |
| chr13 | 5860297   | 5861148   | Klf6          | ENSMUSG00000000078 | -13  | 0.24 | 0.14 | 0.11 | 0.24 | 0.06 | 0.17 |
| chr13 | 38128729  | 38129440  | Cage1         | ENSMUSG00000044566 | -292 | 0.3  | 0.12 | 0.11 | 0.12 | 0.09 | 0.17 |
| chr13 | 96387941  | 96388753  | F2r           | ENSMUSG00000048376 | 67   | 0.1  | 0.13 | 0.14 | 0.23 | 0.39 | 0.09 |
| chr13 | 53567658  | 53568268  | Msx2          | ENSMUSG00000021469 | 480  | 0.24 | 0.08 | 0.08 | 0.16 | 0.06 | 0.14 |
| chr13 | 55546015  | 55547136  | Grk6          | ENSMUSG00000074886 | -120 | 0.13 | 0.14 | 0.12 | 0.15 | 0.24 | 0.17 |
| chr13 | 113777684 | 113778530 | Ccno          | ENSMUSG00000042417 | 97   | 0.2  | 0.13 | 0.1  | 0.12 | 0.09 | 0.1  |
| chr13 | 34169557  | 34170021  | Tubb2a        | ENSMUSG00000058672 | 88   | 0.28 | 0.31 | 0.08 | 0.11 | 0.1  | 0.13 |
| chr13 | 41315524  | 41315762  | Elovl2        | ENSMUSG00000021364 | -112 | 0.16 | 0.22 | 0.16 | 0.19 | 0.29 | 0.17 |
| chr13 | 64375224  | 64376927  | Cdc14b        | ENSMUSG00000033102 | 112  | 0.16 | 0.21 | 0.1  | 0.16 | 0.28 | 0.17 |
| chr13 | 23460763  | 23461286  | Zfp322a       | ENSMUSG00000046351 | -155 | 0.36 | 0.57 | 0.11 | 0.19 | 0.07 | 0.11 |
| chr13 | 110692707 | 110693566 | Pde4d         | ENSMUSG00000021699 | -174 | 0.09 | 0.18 | 0.1  | 0.18 | 0.21 | 0.17 |
| chr13 | 17895176  | 17897641  | Cdk13         | ENSMUSG00000041297 | 523  | 0.16 | 0.11 | 0.1  | 0.18 | 0.11 | 0.12 |
| chr13 | 36209194  | 36209870  | Lym4          | ENSMUSG00000046573 | -306 | 0.67 | 0.32 | 0.11 | 0.26 | 0.25 | 0.23 |
| chr13 | 55431274  | 55431693  | Mxd3          | ENSMUSG00000021485 | -364 | 0.07 | 0.06 | 0.08 | 0.18 | 0.22 | 0.12 |
| chr13 | 73604598  | 73605126  | Lpcat1        | ENSMUSG00000021608 | 217  | 1    | 0.29 | 0.11 | 1    | 0.22 | 0.2  |
| chr13 | 18035551  | 18036291  | Rala          | ENSMUSG00000008859 | 152  | 0.18 | 0.22 | 0.1  | 0.21 | 0.09 | 0.14 |
| chr13 | 39052118  | 39052615  | Slc35b3       | ENSMUSG00000021432 | 40   | 0.3  | 0.29 | 0.06 | 0.08 | 0.13 | 0.1  |
| chr13 | 97694452  | 97695401  | Gcnt4         | ENSMUSG00000091387 | 282  | 0.38 | 0.31 | 0.12 | 0.15 | 0.15 | 0.15 |
| chr13 | 34743820  | 34745079  | 1300014106Rik | ENSMUSG00000021411 | 91   | 0.18 | 0.15 | 0.09 | 0.12 | 0.11 | 0.17 |
| chr13 | 101602930 | 101603508 | Slc30a5       | ENSMUSG00000021629 | 76   | 0.33 | 0.32 | 0.19 | 0.18 | 0.12 | 0.15 |
| chr13 | 51888129  | 51889072  | Sema4d        | ENSMUSG00000021451 | 433  | 0.32 | 0.31 | 0.11 | 0.18 | 0.23 | 0.16 |
| chr13 | 45602755  | 45603138  | Gmpr          | ENSMUSG00000000253 | 133  | 0.31 | 0.21 | 0.14 | 0.22 | 0.15 | 0.16 |
| chr13 | 45484833  | 45485816  | Mylip         | ENSMUSG00000038175 | 213  | 0.18 | 0.22 | 0.13 | 0.16 | 0.07 | 0.12 |
| chr13 | 22098666  | 22099126  | Prss16        | ENSMUSG00000006179 | -612 | 0.19 | 0.3  | 0.22 | 0.3  | 0.08 | 0.22 |
| chr13 | 54867224  | 54867750  | Sncb          | ENSMUSG00000034891 | -29  | 0.4  | 0.14 | 0.2  | 0.22 | 0.19 | 0.21 |
| chr13 | 12612437  | 12612790  | Edaradd       | ENSMUSG00000039309 | 66   | 0.24 | NA   | 0.11 | 0.15 | 0.05 | 0.16 |
| chr13 | 36826933  | 36827155  | Nrn1          | ENSMUSG00000039114 | -698 | 0.17 | 0.09 | 0.09 | 0.13 | 0.04 | 0.14 |

|       |           |           |               |                    |      |      |      |      |      |      |      |
|-------|-----------|-----------|---------------|--------------------|------|------|------|------|------|------|------|
| chr13 | 47138552  | 47139373  | Tpmt          | ENSMUSG00000021376 | -383 | 0.1  | 0.09 | 0.08 | 0.1  | 0.06 | 0.12 |
| chr13 | 43493582  | 43494202  | Nol7          | ENSMUSG00000063200 | 147  | 0.28 | 0.25 | 0.11 | 0.15 | 0.14 | 0.13 |
| chr13 | 34027417  | 34027713  | 1110046J04Rik | ENSMUSG00000085457 | -124 | 0.82 | 1    | 0.46 | 0.31 | 0.42 | 0.41 |
| chr13 | 29043615  | 29045334  | Sox4          | ENSMUSG00000076431 | 416  | 0.17 | 0.11 | 0.14 | 0.17 | 0.1  | 0.15 |
| chr13 | 44825029  | 44826728  | Jarid2        | ENSMUSG00000038518 | 714  | 0.25 | 0.16 | 0.12 | 0.12 | 0.18 | 0.17 |
| chr13 | 118391090 | 118391743 | Hcn1          | ENSMUSG00000021730 | 129  | 0.24 | 0.37 | 0.12 | 0.19 | 0.1  | 0.15 |
| chr13 | 9092685   | 9093517   | Larp4b        | ENSMUSG00000033499 | -50  | 0.31 | 0.34 | 0.11 | 0.16 | 0.15 | 0.16 |
| chr13 | 25147743  | 25148363  | Dcdc2a        | ENSMUSG00000035910 | 180  | 0.12 | 0.14 | 0.11 | 0.12 | 0.06 | 0.19 |
| chr13 | 54890434  | 54891384  | Tspan17       | ENSMUSG00000025875 | 171  | 0.25 | 0.1  | 0.11 | 0.11 | 0.15 | 0.09 |
| chr13 | 67033636  | 67034456  | Mterfd1       | ENSMUSG00000021519 | -402 | 0.26 | 0.2  | 0.14 | 0.15 | 0.16 | 0.18 |
| chr13 | 60277198  | 60278952  | Gas1          | ENSMUSG00000052957 | 553  | 0.16 | 0.12 | 0.11 | 0.13 | 0.11 | 0.12 |
| chr13 | 40825532  | 40827213  | Tfap2a        | ENSMUSG00000021359 | -585 | 0.16 | 0.21 | 0.1  | 0.13 | 0.08 | 0.15 |
| chr13 | 49062700  | 49063978  | Fam120a       | ENSMUSG00000038014 | 47   | 0.13 | 0.12 | 0.07 | 0.1  | 0.09 | 0.09 |
| chr13 | 54167087  | 54167681  | Sfxn1         | ENSMUSG00000021474 | 170  | 0.09 | 0.04 | 0.08 | 0.15 | 0.05 | 0.08 |
| chr13 | 53472563  | 53472863  | Sptlc1        | ENSMUSG00000021468 | 21   | 0.16 | 0.15 | 0.09 | 0.13 | 0.08 | 0.11 |
| chr13 | 55253991  | 55254628  | Fgfr4         | ENSMUSG0000005320  | 308  | 0.19 | 0.14 | 0.13 | 0.14 | 0.11 | 0.15 |
| chr13 | 69749803  | 69751148  | Srd5a1        | ENSMUSG00000021594 | -277 | 0.1  | 0.11 | 0.09 | 0.16 | 0.27 | 0.2  |
| chr13 | 95558772  | 95559328  | Tbca          | ENSMUSG00000042043 | 152  | 0.16 | 0.12 | 0.07 | 0.17 | 0.07 | 0.15 |
| chr13 | 95746202  | 95746542  | Wdr41         | ENSMUSG00000042015 | 73   | 0.25 | NA   | 0.04 | 0.06 | 0.03 | 0.09 |
| chr13 | 81024689  | 81025672  | 1700023H06Rik | ENSMUSG00000089827 | -395 | 0.27 | 0.12 | 0.12 | 0.14 | 0.18 | 0.15 |
| chr13 | 12742097  | 12743040  | Gpr137b-ps    | ENSMUSG00000075118 | -4   | 0.28 | 0.19 | 0.08 | 0.14 | 0.14 | 0.13 |
| chr13 | 54712359  | 54712839  | Cltb          | ENSMUSG00000047547 | 54   | 0.14 | 0.09 | 0.1  | 0.18 | 0.09 | 0.13 |
| chr13 | 113717514 | 113718170 | Skiv2l2       | ENSMUSG00000016018 | -254 | 0.19 | 0.27 | 0.1  | 0.14 | 0.08 | 0.13 |
| chr13 | 91881044  | 91881300  | Acot12        | ENSMUSG00000021620 | 55   | 0.13 | 0.09 | 0.13 | 0.14 | 0.24 | 0.12 |
| chr13 | 15554666  | 15556331  | Gli3          | ENSMUSG00000021318 | 430  | 0.2  | 0.14 | 0.1  | 0.21 | 0.14 | 0.14 |
| chr13 | 59923886  | 59924728  | Zcchc6        | ENSMUSG00000035248 | 201  | 0.14 | 0.12 | 0.1  | 0.19 | 0.09 | 0.11 |
| chr13 | 84361650  | 84361957  | A230107N01Rik | ENSMUSG00000092067 | -23  | 0.23 | 0.15 | 0.14 | 0.22 | 0.48 | 0.17 |
| chr13 | 102464452 | 102464693 | Pik3r1        | ENSMUSG00000041417 | -226 | 0.11 | 0.56 | 0.15 | 0.18 | 0.22 | 0.17 |
| chr13 | 102537208 | 102538471 | Pik3r1        | ENSMUSG00000041417 | 333  | 0.09 | 0.09 | 0.11 | 0.17 | 0.14 | 0.14 |
| chr13 | 115879904 | 115880542 | Pelo          | ENSMUSG00000042275 | 173  | 0.33 | 0.22 | 0.1  | 0.21 | 0.21 | 0.19 |

|       |           |           |               |                    |      |      |      |      |      |      |      |
|-------|-----------|-----------|---------------|--------------------|------|------|------|------|------|------|------|
| chr13 | 47201015  | 47202072  | Dek           | ENSMUSG00000021377 | -345 | 0.15 | 0.12 | 0.11 | 0.18 | 0.09 | 0.12 |
| chr13 | 59686518  | 59687230  | Agtpbp1       | ENSMUSG00000021557 | -302 | 0.11 | 0.12 | 0.1  | 0.13 | 0.08 | 0.11 |
| chr13 | 55931958  | 55932846  | Pitx1         | ENSMUSG00000021506 | 384  | 0.15 | 0.15 | 0.1  | 0.16 | 0.09 | 0.16 |
| chr13 | 19487324  | 19487826  | Stard3nl      | ENSMUSG0000003062  | 46   | 0.47 | 0.18 | 0.08 | 0.16 | 0.25 | 0.1  |
| chr13 | 67914780  | 67915035  | Zfp273        | ENSMUSG00000030446 | 154  | 0.29 | 0.25 | 0.08 | 0.24 | 0.06 | 0.09 |
| chr13 | 97312828  | 97313372  | Col4a3bp      | ENSMUSG00000021669 | 410  | 0.17 | 0.14 | 0.1  | 0.13 | 0.09 | 0.12 |
| chr13 | 36060125  | 36061434  | Ppp1r3g       | ENSMUSG00000050423 | 1057 | 0.15 | 0.29 | 0.11 | 0.21 | 0.22 | 0.14 |
| chr13 | 74258560  | 74258973  | Slc9a3        | ENSMUSG00000036123 | -197 | 0.18 | 0.18 | 0.1  | 0.2  | 0.08 | 0.13 |
| chr13 | 77274297  | 77274884  | Ankrd32       | ENSMUSG00000021597 | 109  | 0.4  | 0.2  | 0.12 | 0.16 | 0.14 | 0.15 |
| chr13 | 32430128  | 32430676  | Gmrs          | ENSMUSG00000038372 | 81   | 0.21 | 0.12 | 0.1  | 0.14 | 0.1  | 0.11 |
| chr13 | 53075555  | 53077209  | Nfil3         | ENSMUSG00000056749 | 60   | 0.15 | 0.11 | 0.11 | 0.14 | 0.09 | 0.12 |
| chr13 | 56804217  | 56805303  | Smad5         | ENSMUSG00000021540 | 389  | 0.22 | 0.07 | 0.1  | 0.15 | 0.14 | 0.12 |
| chr13 | 43398628  | 43399816  | Gfod1         | ENSMUSG00000051335 | 319  | 0.15 | 0.2  | 0.1  | 0.13 | 0.1  | 0.12 |
| chr13 | 43655010  | 43655678  | Ccdc90a       | ENSMUSG00000021371 | 151  | 0.19 | 0.15 | 0.1  | 0.17 | 0.14 | 0.14 |
| chr13 | 34093984  | 34094830  | Ripk1         | ENSMUSG00000021408 | 175  | 0.22 | 0.22 | 0.11 | 0.12 | 0.13 | 0.13 |
| chr13 | 23653786  | 23654392  | Hist1h3e      | ENSMUSG00000069273 | 149  | 0.44 | 1    | 0.31 | 0.4  | 0.22 | 0.2  |
| chr13 | 96661521  | 96662072  | Iqgap2        | ENSMUSG00000021676 | 81   | 0.11 | 0.13 | 0.07 | 0.11 | 0.06 | 0.1  |
| chr13 | 30228190  | 30228649  | Mboat1        | ENSMUSG00000038732 | 52   | 0.2  | 0.54 | 0.15 | 0.18 | 0.11 | 0.13 |
| chr13 | 45173919  | 45174487  | Gm9817        | ENSMUSG00000047061 | 142  | 0.86 | 0.87 | 0.48 | 0.61 | 0.56 | 0.43 |
| chr13 | 118009371 | 118009991 | Emb           | ENSMUSG00000021728 | 249  | 0.09 | 0.14 | 0.11 | 0.12 | 0.18 | 0.12 |
| chr13 | 55794277  | 55795078  | B230219D22Rik | ENSMUSG00000045767 | 192  | 0.17 | 0.1  | 0.1  | 0.11 | 0.11 | 0.1  |
| chr13 | 65380022  | 65380370  | Zfp369        | ENSMUSG00000021514 | 74   | 0.11 | 0.38 | 0.18 | 0.19 | 0.2  | 0.17 |
| chr13 | 115608362 | 115608679 | Mocs2         | ENSMUSG00000015536 | 68   | 0.56 | 0.45 | 0.16 | 0.31 | 0.34 | 0.18 |
| chr13 | 32893664  | 32895052  | Wrnip1        | ENSMUSG00000021400 | 451  | 0.17 | 0.15 | 0.09 | 0.13 | 0.09 | 0.11 |
| chr13 | 34222198  | 34222425  | Tubb2b        | ENSMUSG00000045136 | -88  | 0.11 | 0.33 | 0.1  | 0.23 | 0.23 | 0.23 |
| chr13 | 64263056  | 64263717  | Habp4         | ENSMUSG00000021476 | 212  | 0.11 | 0.1  | 0.12 | 0.14 | 0.15 | 0.18 |
| chr13 | 94541669  | 94542111  | Arsb          | ENSMUSG00000042082 | 213  | 0.15 | 0.1  | 0.12 | 0.08 | 0.08 | 0.11 |
| chr13 | 48356409  | 48357836  | Id4           | ENSMUSG00000021379 | 326  | 0.07 | 0.14 | 0.1  | 0.16 | 0.11 | 0.13 |
| chr13 | 97312238  | 97312580  | Polk          | ENSMUSG00000021668 | 31   | 0.18 | 0.09 | 0.11 | 0.13 | 0.05 | 0.12 |
| chr13 | 109004384 | 109005223 | Elovl7        | ENSMUSG00000021696 | 205  | 0.08 | 0.11 | 0.11 | 0.12 | 0.14 | 0.13 |

|       |           |           |          |                    |      |      |      |      |      |      |      |
|-------|-----------|-----------|----------|--------------------|------|------|------|------|------|------|------|
| chr13 | 8870023   | 8870717   | Wdr37    | ENSMUSG00000021147 | -145 | 0.24 | 0.8  | 0.17 | 0.29 | 0.38 | 0.19 |
| chr13 | 19040241  | 19040896  | Amph     | ENSMUSG00000021314 | 328  | 0.19 | 0.17 | 0.1  | 0.22 | 0.11 | 0.11 |
| chr13 | 54723013  | 54723567  | Faf2     | ENSMUSG00000025873 | 145  | 0.08 | 0.17 | 0.11 | 0.24 | 0.15 | 0.19 |
| chr13 | 73468405  | 73469006  | Mrpl36   | ENSMUSG00000021607 | 248  | 0.2  | 0.43 | 0.23 | 0.28 | 0.6  | 0.32 |
| chr13 | 100873649 | 100874123 | Bdp1     | ENSMUSG00000049658 | -93  | 0.1  | 0.16 | 0.1  | 0.13 | 0.04 | 0.13 |
| chr13 | 101386470 | 101386971 | Marveld2 | ENSMUSG00000021636 | 146  | 0.16 | 0.14 | 0.11 | 0.26 | 0.09 | 0.19 |
| chr13 | 12198201  | 12199293  | Ryr2     | ENSMUSG00000021313 | 465  | 0.15 | 0.15 | 0.1  | 0.16 | 0.25 | 0.13 |
| chr13 | 41174698  | 41175129  | Mak      | ENSMUSG00000021363 | 162  | 0.25 | 0.17 | 0.13 | 0.13 | 0.06 | 0.15 |
| chr13 | 43266652  | 43267156  | Tbc1d7   | ENSMUSG00000021368 | -176 | 0.23 | 0.18 | 0.11 | 0.19 | 0.14 | 0.17 |
| chr13 | 73984330  | 73985146  | Nkd2     | ENSMUSG00000021567 | 322  | 0.3  | 0.39 | 0.22 | 0.29 | 0.18 | 0.18 |
| chr13 | 23515373  | 23515795  | Abt1     | ENSMUSG00000036376 | 151  | 0.28 | 0.35 | 0.1  | 0.09 | 0.43 | 0.09 |
| chr13 | 54676322  | 54676835  | Arl10    | ENSMUSG00000025870 | 202  | 0.41 | 0.14 | 0.11 | 0.15 | 0.25 | 0.09 |
| chr13 | 55422923  | 55423699  | Rab24    | ENSMUSG00000034789 | 30   | 0.33 | 0.25 | 0.16 | 0.18 | 0.19 | 0.17 |
| chr13 | 9763038   | 9764596   | Zmynd11  | ENSMUSG00000021156 | -153 | 0.14 | 0.22 | 0.13 | 0.14 | 0.11 | 0.12 |
| chr13 | 52625730  | 52626172  | Diras2   | ENSMUSG00000047842 | 254  | 0.27 | 0.13 | 0.05 | 0.21 | 0.1  | 0.11 |
| chr13 | 54788435  | 54789722  | Rnf44    | ENSMUSG00000034928 | -464 | 0.19 | 0.32 | 0.11 | 0.13 | 0.26 | 0.17 |
| chr13 | 55206544  | 55207076  | Zfp346   | ENSMUSG00000021481 | 138  | 0.1  | 0.23 | 0.07 | 0.13 | 0.17 | 0.12 |
| chr13 | 85428122  | 85429280  | Rasa1    | ENSMUSG00000021549 | -67  | 0.17 | 0.12 | 0.11 | 0.12 | 0.13 | 0.14 |
| chr13 | 93614661  | 93615053  | Mtx3     | ENSMUSG00000021704 | 115  | 0.22 | 0.38 | 0.35 | 1    | 0.51 | 0.51 |
| chr13 | 120217183 | 120218521 | Paip1    | ENSMUSG00000025451 | 444  | 0.12 | 0.14 | 0.13 | 0.18 | 0.15 | 0.18 |
| chr13 | 41096309  | 41096846  | Pak1ip1  | ENSMUSG00000038683 | 185  | 0.29 | 0.32 | 0.12 | 0.18 | 0.21 | 0.18 |
| chr13 | 99660793  | 99661192  | Tnpo1    | ENSMUSG00000009470 | 5    | 0.57 | 0.55 | 0.2  | 0.19 | 0.33 | 0.12 |
| chr13 | 45096982  | 45097600  | Dtnbp1   | ENSMUSG00000057531 | 218  | 0.11 | 0.28 | 0.08 | 0.15 | 0.19 | 0.13 |
| chr13 | 56397241  | 56398004  | Cxcl14   | ENSMUSG00000021508 | 44   | 0.06 | 0.15 | 0.08 | 0.16 | 0.11 | 0.1  |
| chr13 | 51740245  | 51741130  | Cks2     | ENSMUSG00000062248 | 86   | 0.25 | 0.09 | 0.11 | 0.21 | 0.15 | 0.18 |
| chr13 | 58228636  | 58230836  | Hnrmpa0  | ENSMUSG00000007836 | 181  | 0.13 | 0.17 | 0.1  | 0.15 | 0.15 | 0.14 |
| chr13 | 74487355  | 74487812  | Sdha     | ENSMUSG00000021577 | 22   | 0.14 | 0.15 | 0.14 | 0.21 | 0.03 | 0.17 |
| chr13 | 93380554  | 93381469  | Serinc5  | ENSMUSG00000021703 | -82  | 0.35 | 0.38 | 0.16 | 0.21 | 0.24 | 0.17 |
| chr13 | 14046246  | 14047484  | B3galnt2 | ENSMUSG00000039242 | -76  | 0.6  | 0.6  | 0.11 | 0.21 | 0.43 | 0.19 |
| chr13 | 51746908  | 51747407  | Secisbp2 | ENSMUSG00000035139 | 91   | 0.33 | 0.11 | 0.12 | 0.06 | 0.1  | 0.16 |

|       |           |           |               |                    |       |      |      |      |      |      |      |
|-------|-----------|-----------|---------------|--------------------|-------|------|------|------|------|------|------|
| chr13 | 54569874  | 54570313  | Thoc3         | ENSMUSG00000025872 | 56    | 0.08 | 0.27 | 0.1  | 0.15 | 0.2  | 0.1  |
| chr13 | 51298010  | 51298416  | Hist1h2al     | ENSMUSG00000091383 | 221   | 0.15 | 0.06 | 0.09 | 0.06 | 0.12 | 0.13 |
| chr13 | 73465699  | 73466056  | Ndufs6        | ENSMUSG00000021606 | 23    | 0.27 | 0.36 | 0.1  | 0.18 | 0.12 | 0.07 |
| chr13 | 55937380  | 55937719  | Pitx1         | ENSMUSG00000021506 | 4     | 0.12 | 0.12 | 0.13 | 0.15 | 0.08 | 0.25 |
| chr13 | 77847897  | 77848232  | Fam172a       | ENSMUSG00000064138 | 113   | 0.2  | 0.11 | 0.05 | 0.08 | 1    | 0.07 |
| chr13 | 54666344  | 54666812  | 4833439L19Rik | ENSMUSG00000025871 | 74    | 0.22 | 0.22 | 0.11 | 0.17 | 0.12 | 0.18 |
| chr13 | 83662647  | 83662956  | Mef2c         | ENSMUSG00000005583 | -1175 | 0.16 | 0.12 | 0.07 | 0.15 | 0.07 | 0.15 |
| chr13 | 17786406  | 17787600  | 5033411D12Rik | ENSMUSG00000055137 | -437  | 0.13 | 0.13 | 0.2  | 0.2  | 0.17 | 0.17 |
| chr13 | 21271847  | 21273017  | Trim27        | ENSMUSG00000021326 | 350   | 0.16 | 0.25 | 0.16 | 0.19 | 0.2  | 0.15 |
| chr13 | 100284885 | 100286650 | Mtap1b        | ENSMUSG00000052727 | 790   | 0.15 | 0.27 | 0.11 | 0.13 | 0.21 | 0.12 |
| chr13 | 3892695   | 3892928   | Net1          | ENSMUSG00000021215 | 13    | 0.17 | 0.13 | 0.09 | 0.18 | 0.48 | 0.19 |
| chr13 | 95643621  | 95643879  | Otp           | ENSMUSG00000021685 | -1832 | 0.12 | 0.07 | 0.09 | 0.16 | 0.08 | 0.11 |
| chr13 | 97967980  | 97968435  | Hexb          | ENSMUSG00000021665 | 105   | 0.08 | 0.16 | 0.09 | 0.14 | 0.05 | 0.09 |
| chr13 | 48720568  | 48721376  | Ptpdc1        | ENSMUSG00000038042 | -19   | 0.11 | 0.14 | 0.09 | 0.17 | 0.08 | 0.09 |
| chr13 | 23713966  | 23714512  | Hist1h1e      | ENSMUSG00000051627 | 132   | 0.33 | 0.13 | 0.11 | 0.11 | 0.11 | 0.22 |
| chr13 | 31898060  | 31898860  | Foxc1         | ENSMUSG00000050295 | -55   | 0.12 | 0.32 | 0.14 | 0.16 | 0.08 | 0.14 |
| chr13 | 38242982  | 38243818  | Dsp           | ENSMUSG00000054889 | 203   | 0.2  | 0.13 | 0.17 | 0.18 | 0.28 | 0.12 |
| chr13 | 38436931  | 38438624  | Bmp6          | ENSMUSG00000039004 | 782   | 0.2  | 0.3  | 0.11 | 0.12 | 0.15 | 0.16 |
| chr13 | 49436464  | 49437312  | Bicd2         | ENSMUSG00000037933 | -30   | 0.25 | 0.29 | 0.1  | 0.05 | 0.08 | 0.14 |
| chr13 | 58008842  | 58009812  | Spock1        | ENSMUSG00000056222 | -379  | 0.32 | 0.22 | 0.08 | 0.15 | 0.25 | 0.11 |
| chr13 | 74074792  | 74075485  | Trip13        | ENSMUSG00000021569 | 77    | 0.11 | 0.3  | 0.1  | 0.13 | 0.16 | 0.12 |
| chr13 | 40799318  | 40799560  | Gm9979        | ENSMUSG00000055732 | 65    | 0.19 | 0.18 | 0.11 | 0.12 | 0.1  | 0.14 |
| chr13 | 46822180  | 46823581  | Nup153        | ENSMUSG00000021374 | 338   | 0.2  | 0.13 | 0.09 | 0.15 | 0.17 | 0.13 |
| chr13 | 49241879  | 49243535  | Wnk2          | ENSMUSG00000037989 | -106  | 0.16 | 0.17 | 0.1  | 0.14 | 0.13 | 0.13 |
| chr13 | 22073058  | 22073640  | Pom121l2      | ENSMUSG00000016982 | 286   | 0.8  | 0.3  | 0.1  | 1    | 0.46 | 0.25 |
| chr13 | 35832554  | 35834248  | Cdyl          | ENSMUSG00000059288 | 130   | 0.17 | 0.16 | 0.1  | 0.15 | 0.15 | 0.16 |
| chr13 | 58374710  | 58376214  | Gkap1         | ENSMUSG00000021552 | 87    | 0.11 | 0.07 | 0.07 | 0.12 | 0.08 | 0.12 |
| chr13 | 63664548  | 63667490  | Ptch1         | ENSMUSG00000021466 | -385  | 0.1  | 0.11 | 0.12 | 0.12 | 0.11 | 0.13 |
| chr13 | 30075782  | 30078056  | E2f3          | ENSMUSG00000016477 | -831  | 0.24 | 0.22 | 0.11 | 0.15 | 0.21 | 0.18 |
| chr13 | 95992354  | 95993031  | Pde8b         | ENSMUSG00000021684 | 76    | 0.19 | 0.17 | 0.09 | 0.16 | 0.13 | 0.12 |

|       |           |           |               |                    |      |      |      |      |      |      |      |
|-------|-----------|-----------|---------------|--------------------|------|------|------|------|------|------|------|
| chr13 | 101439673 | 101439907 | Ccdc125       | ENSMUSG00000048924 | 354  | 0.11 | 0.08 | 0.06 | 0.12 | 0.05 | 0.1  |
| chr13 | 114407510 | 114408956 | Snx18         | ENSMUSG00000042364 | 520  | 0.25 | 0.2  | 0.18 | 0.21 | 0.28 | 0.19 |
| chr13 | 23662655  | 23663640  | Hist1h2ae     | ENSMUSG00000069272 | -58  | 0.67 | 0.25 | NA   | NA   | 1    | 1    |
| chr13 | 76521537  | 76522723  | Mctp1         | ENSMUSG00000021596 | 147  | 0.11 | 0.18 | 0.13 | 0.17 | 0.14 | 0.15 |
| chr13 | 25111816  | 25112308  | Mrs2          | ENSMUSG00000021339 | 186  | 0.09 | 0.1  | 0.1  | 0.1  | 0.07 | 0.12 |
| chr13 | 59870674  | 59871770  | Isca1         | ENSMUSG00000044792 | -85  | 0.27 | 0.13 | 0.1  | 0.16 | 0.23 | 0.19 |
| chr13 | 99695696  | 99696781  | Tnpo1         | ENSMUSG00000009470 | 101  | 0.18 | 0.26 | 0.12 | 0.16 | 0.2  | 0.1  |
| chr13 | 120251442 | 120251926 | 4833420G17Rik | ENSMUSG00000062822 | 118  | 1    | 1    | 0.19 | 0.23 | 0.43 | 0.36 |
| chr13 | 24923271  | 24924064  | Acot13        | ENSMUSG00000006717 | -281 | 0.08 | 0.13 | 0.15 | 0.09 | 0.07 | 0.12 |
| chr13 | 31065616  | 31066005  | Exoc2         | ENSMUSG00000021357 | 106  | 0.1  | 0.07 | 0.09 | 0.11 | 0.06 | 0.09 |
| chr13 | 31649692  | 31651967  | Foxq1         | ENSMUSG00000038415 | 790  | 0.12 | 0.2  | 0.11 | 0.14 | 0.1  | 0.13 |
| chr13 | 93300390  | 93301350  | Zfyve16       | ENSMUSG00000021706 | -47  | 0.13 | 0.08 | 0.09 | 0.13 | 0.1  | 0.12 |
| chr13 | 3633190   | 3633662   | Asb13         | ENSMUSG00000033781 | 148  | 0.22 | 0.15 | 0.13 | 0.12 | 0.17 | 0.17 |
| chr13 | 41700816  | 41701895  | Tmem170b      | ENSMUSG00000087370 | -230 | 0.08 | 0.09 | 0.08 | 0.18 | 0.07 | 0.15 |
| chr13 | 76080633  | 76081431  | Rhobtb3       | ENSMUSG00000021589 | 283  | 0.13 | 0.1  | 0.09 | 0.13 | 0.1  | 0.09 |
| chr13 | 93195808  | 93196997  | Ankrd34b      | ENSMUSG00000045034 | 551  | 0.13 | 0.17 | 0.1  | 0.13 | 0.16 | 0.12 |
| chr13 | 97841189  | 97842282  | Fam169a       | ENSMUSG00000041817 | 137  | 0.24 | 0.16 | 0.11 | 0.08 | 0.2  | 0.12 |
| chr13 | 13876248  | 13877211  | Gng4          | ENSMUSG00000021303 | 403  | 0.13 | 0.12 | 0.11 | 0.16 | 0.15 | 0.12 |
| chr13 | 70776195  | 70776783  | BC018507      | ENSMUSG00000034525 | 23   | 0.11 | 0.11 | 0.08 | 0.15 | 0.07 | 0.14 |
| chr13 | 35997959  | 35998188  | Rpp40         | ENSMUSG00000021418 | 124  | 0.17 | 0.25 | 0.3  | 0.11 | 1    | 0.11 |
| chr13 | 24372289  | 24373267  | Lrrc16a       | ENSMUSG00000021338 | -423 | 0.11 | 0.11 | 0.11 | 0.13 | 0.08 | 0.16 |
| chr13 | 101420883 | 101421746 | Rad17         | ENSMUSG00000021635 | -300 | 0.11 | 0.11 | 0.08 | 0.13 | 0.13 | 0.1  |
| chr13 | 74397388  | 74397686  | Ahrr          | ENSMUSG00000021575 | 583  | 0.12 | 0.28 | 0.16 | 0.15 | 0.23 | 0.14 |
| chr13 | 108948351 | 108949194 | Ndufaf2       | ENSMUSG00000068184 | 13   | 0.16 | 0.22 | 0.1  | 0.16 | 0.13 | 0.15 |
| chr13 | 115247477 | 115247754 | Fst           | ENSMUSG00000021765 | 1323 | 0.15 | 0.12 | 0.11 | 0.13 | 0.1  | 0.16 |
| chr13 | 117813195 | 117814735 | Parp8         | ENSMUSG00000021725 | 358  | 0.1  | 0.09 | 0.11 | 0.12 | 0.08 | 0.11 |
| chr13 | 56352704  | 56353897  | Neurog1       | ENSMUSG00000048904 | 224  | 0.18 | 0.15 | 0.13 | 0.16 | 0.16 | 0.15 |
| chr13 | 86185882  | 86186500  | Cox7c         | ENSMUSG00000017778 | -239 | 0.08 | 0.06 | 0.1  | 0.16 | 0.13 | 0.14 |
| chr13 | 94073481  | 94074592  | Homer1        | ENSMUSG00000007617 | 324  | 0.15 | 0.14 | 0.09 | 0.13 | 0.12 | 0.16 |
| chr13 | 114584363 | 114585168 | Arl15         | ENSMUSG00000042348 | 52   | 0.07 | 0.09 | 0.08 | 0.12 | 0.1  | 0.13 |



|       |           |           |               |                    |      |      |      |      |      |      |      |
|-------|-----------|-----------|---------------|--------------------|------|------|------|------|------|------|------|
| chr13 | 8995031   | 8995665   | Gtpbp4        | ENSMUSG00000021149 | -85  | 0.33 | 0.18 | 0.1  | 0.13 | 0.24 | 0.15 |
| chr13 | 14131653  | 14132051  | Tbce          | ENSMUSG00000039233 | -6   | 1    | 0.16 | 0.14 | 0.35 | 0.22 | 0.14 |
| chr13 | 120197593 | 120197945 | Nnt           | ENSMUSG00000025453 | 35   | 0.33 | 0.33 | 0.13 | 0.08 | 0.26 | 0.13 |
| chr13 | 99086571  | 99087128  | Btf3          | ENSMUSG00000021660 | 73   | 0.29 | 0.1  | 0.1  | 0.22 | 0.37 | 0.2  |
| chr13 | 101261972 | 101262609 | Gtf2h2        | ENSMUSG00000021639 | 3    | 0.1  | 0.17 | 0.07 | 0.12 | 0.24 | 0.1  |
| chr13 | 55588682  | 55589515  | Dbn1          | ENSMUSG00000034675 | -104 | 0.08 | 0.13 | 0.08 | 0.14 | 0.07 | 0.1  |
| chr13 | 83860471  | 83860849  | C130071C03Rik | ENSMUSG00000050334 | -500 | 0.29 | NA   | 0.14 | NA   | 0.67 | 0.3  |
| chr13 | 99584387  | 99585430  | Fcho2         | ENSMUSG00000041685 | 496  | 0.18 | 0.17 | 0.15 | 0.15 | 0.15 | 0.18 |
| chr13 | 42147131  | 42148163  | Hivep1        | ENSMUSG00000021366 | 257  | 0.13 | 0.14 | 0.09 | 0.14 | 0.12 | 0.12 |
| chr13 | 13485306  | 13486247  | Gpr137b       | ENSMUSG00000021306 | 55   | 0.33 | 0.12 | 0.1  | 0.15 | 0.15 | 0.11 |
| chr13 | 72100227  | 72101480  | Irx1          | ENSMUSG00000060969 | 318  | 0.09 | 0.1  | 0.12 | 0.12 | 0.11 | 0.1  |
| chr13 | 112597980 | 112599677 | Map3k1        | ENSMUSG00000021754 | -305 | 0.1  | 0.08 | 0.09 | 0.13 | 0.08 | 0.11 |
| chr13 | 54150475  | 54151149  | Drd1a         | ENSMUSG00000021478 | 215  | 1    | NA   | 0.19 | 0.14 | 0.2  | 0.19 |
| chr13 | 20182248  | 20183527  | Elmo1         | ENSMUSG00000041112 | 399  | 0.15 | 0.19 | 0.11 | 0.11 | 0.12 | 0.11 |
| chr13 | 30636759  | 30637446  | Uqcrrf1       | ENSMUSG00000038462 | 129  | 0.15 | 0.22 | 0.08 | 0.12 | 0.11 | 0.1  |
| chr13 | 64471164  | 64471751  | Ctst          | ENSMUSG00000021477 | 157  | 0.29 | 0.17 | 0.21 | 0.17 | 0.22 | 0.12 |
| chr13 | 96144786  | 96145396  | Aggf1         | ENSMUSG00000021681 | 198  | 0.15 | 0.41 | 0.08 | 0.22 | 0.11 | 0.15 |
| chr13 | 112278977 | 112280953 | Gpbp1         | ENSMUSG00000032745 | 271  | 0.12 | 0.1  | 0.1  | 0.15 | 0.11 | 0.13 |
| chr13 | 38085472  | 38086191  | Ssr1          | ENSMUSG00000021427 | 163  | 0.13 | 0.13 | 0.07 | 0.15 | 0.11 | 0.11 |
| chr13 | 9093706   | 9093971   | Larp4b        | ENSMUSG00000033499 | 687  | 0.24 | 0.19 | 0.16 | 0.21 | 0.2  | 0.19 |
| chr13 | 55565493  | 55566237  | Prr7          | ENSMUSG00000034686 | 237  | 0.1  | 0.14 | 0.1  | 0.12 | 0.11 | 0.14 |
| chr13 | 109106282 | 109106926 | Gm2822        | ENSMUSG00000090358 | -137 | 0.11 | 0.2  | 0.09 | 0.14 | 0.09 | 0.14 |
| chr13 | 55736220  | 55736892  | Ddx46         | ENSMUSG00000021500 | 168  | 0.5  | 0.16 | 0.11 | 0.12 | 0.14 | 0.11 |
| chr13 | 46061305  | 46061564  | 5033430I15Rik | ENSMUSG00000038152 | 812  | 0.25 | 0.24 | 0.13 | 0.16 | 0.1  | 0.13 |
| chr13 | 73741236  | 73741886  | Ciptm1l       | ENSMUSG00000021610 | 7    | 0.08 | 0.12 | 0.1  | 0.14 | 0.1  | 0.12 |
| chr13 | 34967309  | 34968011  | Prpf4b        | ENSMUSG00000021413 | 297  | 0.36 | 0.39 | 0.22 | 0.39 | 0.31 | 0.14 |
| chr13 | 113783725 | 113784653 | Gm6320        | ENSMUSG00000074651 | 113  | 0.22 | 0.19 | 0.16 | 0.17 | 0.25 | 0.18 |
| chr13 | 48965436  | 48965916  | Phf2          | ENSMUSG00000038025 | 578  | 0.15 | 0.15 | 0.13 | 0.11 | 0.13 | 0.13 |
| chr13 | 46513493  | 46514577  | Rbm24         | ENSMUSG00000038132 | 366  | 0.15 | 0.11 | 0.15 | 0.2  | 0.13 | 0.17 |
| chr13 | 49747939  | 49748487  | Cenpp         | ENSMUSG00000021391 | -89  | 0.18 | 0.19 | 0.15 | 0.11 | 0.13 | 0.11 |

|       |           |           |               |                    |       |      |      |      |      |      |      |
|-------|-----------|-----------|---------------|--------------------|-------|------|------|------|------|------|------|
| chr13 | 68720736  | 68721485  | Mtrr          | ENSMUSG00000034617 | -127  | 0.16 | 0.18 | 0.1  | 0.16 | 0.15 | 0.15 |
| chr13 | 74345913  | 74346227  | Exoc3         | ENSMUSG00000034152 | 78    | 0.35 | 0.52 | 0.17 | 0.18 | 0.28 | 0.14 |
| chr13 | 81849935  | 81850911  | Polr3g        | ENSMUSG00000035834 | -479  | 0.19 | 0.15 | 0.12 | 0.18 | 0.22 | 0.12 |
| chr13 | 95128322  | 95129369  | Gm9776        | ENSMUSG00000042857 | -72   | 0.25 | 0.2  | 0.17 | 0.21 | 0.21 | 0.2  |
| chr13 | 109906620 | 109907221 | Pde4d         | ENSMUSG00000021699 | 85    | 0.09 | 0.11 | 0.14 | 0.14 | 0.06 | 0.26 |
| chr13 | 113778911 | 113779218 | Ccno          | ENSMUSG00000042417 | 1054  | 0.33 | 0.12 | 0.18 | 0.19 | 0.23 | 0.13 |
| chr13 | 46764632  | 46765644  | C78339        | ENSMUSG00000069237 | 279   | 0.12 | 0.22 | 0.13 | 0.19 | 0.13 | 0.16 |
| chr13 | 55201179  | 55201614  | Uimc1         | ENSMUSG00000025878 | 219   | 0.1  | 0.1  | 0.06 | 0.23 | 0.08 | 0.17 |
| chr13 | 64413703  | 64414160  | 1110018J18Rik | ENSMUSG00000021482 | 82    | 0.08 | 0.29 | 0.15 | 0.15 | 0.17 | 0.06 |
| chr13 | 12553486  | 12553838  | Lgals8        | ENSMUSG00000057554 | 95    | 0.26 | 0.08 | 0.09 | 0.17 | 0.12 | 0.25 |
| chr13 | 48608634  | 48608856  | Zfp169        | ENSMUSG00000050954 | 18    | 0.13 | 0.17 | 0.13 | 0.19 | 0.21 | 0.14 |
| chr13 | 95645315  | 95645517  | Otp           | ENSMUSG00000021685 | -166  | 0.2  | 0.14 | 0.19 | 0.17 | 0.14 | 0.23 |
| chr13 | 12658093  | 12658649  | Ero1lb        | ENSMUSG00000057069 | 221   | 0.14 | 0.09 | 0.09 | 0.12 | 0.09 | 0.11 |
| chr13 | 18084886  | 18085257  | 1600012F09Rik | ENSMUSG00000075054 | 114   | 0.22 | 0.14 | 0.13 | 0.2  | 0.12 | 0.11 |
| chr13 | 100114381 | 100114827 | Ptcd2         | ENSMUSG00000021650 | 29    | 0.33 | 0.21 | 0.14 | 0.14 | 0.07 | 0.2  |
| chr13 | 23646821  | 23647460  | Hist1h1d      | ENSMUSG00000052565 | 239   | 0.39 | 0.73 | 0.12 | 0.63 | 0.34 | 0.24 |
| chr13 | 38619744  | 38620414  | Txndc5        | ENSMUSG00000038991 | -296  | 0.12 | 0.1  | 0.11 | 0.12 | 0.1  | 0.16 |
| chr13 | 55672063  | 55672647  | Fam193b       | ENSMUSG00000021495 | -7    | 0.14 | 0.35 | 0.17 | 0.22 | 0.28 | 0.14 |
| chr13 | 83870384  | 83871126  | Gm17547       | ENSMUSG00000091547 | -1568 | 0.07 | 0.11 | 0.12 | 0.11 | 0.1  | 0.1  |
| chr13 | 49282892  | 49283489  | Ninj1         | ENSMUSG00000037966 | 296   | 0.09 | 0.11 | 0.13 | 0.27 | 0.08 | 0.15 |
| chr13 | 49516299  | 49517134  | lppk          | ENSMUSG00000021385 | 69    | 0.17 | 0.2  | 0.1  | 0.2  | 0.14 | 0.19 |
| chr13 | 94444227  | 94444508  | Bhmt2         | ENSMUSG00000042118 | -110  | 0.12 | 0.11 | 0.14 | 0.18 | 0.11 | 0.19 |
| chr13 | 69137625  | 69138341  | Adcy2         | ENSMUSG00000021536 | 436   | 0.1  | 0.1  | 0.07 | 0.12 | 0.08 | 0.11 |
| chr13 | 48758443  | 48759000  | Barx1         | ENSMUSG00000021381 | 354   | 0.11 | 0.21 | 0.1  | 0.17 | 0.09 | 0.09 |
| chr13 | 100894763 | 100895042 | Smn1          | ENSMUSG00000021645 | 95    | 0.11 | 0.23 | 0.08 | 0.13 | 0.17 | 0.14 |
| chr13 | 81796635  | 81797146  | Lysmd3        | ENSMUSG00000035840 | 85    | 0.32 | 0.27 | 0.12 | 0.14 | 0.37 | 0.2  |
| chr13 | 58502605  | 58504703  | Hnmpk         | ENSMUSG00000021546 | -190  | 0.12 | 0.16 | 0.12 | 0.12 | 0.11 | 0.15 |
| chr13 | 73397806  | 73398595  | Irx4          | ENSMUSG00000021604 | 255   | 0.13 | 0.09 | 0.09 | 0.12 | 0.12 | 0.1  |
| chr13 | 100877912 | 100878433 | Serf1         | ENSMUSG00000021643 | 220   | 0.13 | 0.38 | 0.12 | 0.2  | 0.09 | 0.14 |
| chr13 | 44828787  | 44829476  | Jarid2        | ENSMUSG00000038518 | -278  | 0.07 | 0.2  | 0.06 | 0.09 | 0.09 | 0.19 |

|       |           |           |               |                    |      |      |      |      |      |      |      |
|-------|-----------|-----------|---------------|--------------------|------|------|------|------|------|------|------|
| chr13 | 54605016  | 54605837  | 4732471D19Rik | ENSMUSG00000043183 | 286  | 0.11 | 0.12 | 0.1  | 0.14 | 0.12 | 0.09 |
| chr13 | 14155263  | 14157126  | Arid4b        | ENSMUSG00000039219 | 695  | 0.14 | 0.16 | 0.09 | 0.16 | 0.14 | 0.15 |
| chr13 | 22036913  | 22037203  | Zfp184        | ENSMUSG00000006720 | 95   | 0.17 | 0.14 | 0.13 | 0.29 | 0.1  | 0.17 |
| chr13 | 104709736 | 104711889 | Erb2ip        | ENSMUSG00000021709 | -437 | 0.13 | 0.2  | 0.1  | 0.14 | 0.13 | 0.13 |
| chr13 | 74146555  | 74147851  | Gm15912       | ENSMUSG00000085881 | -401 | 0.11 | 0.17 | 0.15 | 0.16 | 0.12 | 0.13 |
| chr13 | 104563913 | 104564805 | Srek1         | ENSMUSG00000032621 | 180  | 0.1  | 0.21 | 0.11 | 0.19 | 0.09 | 0.17 |
| chr13 | 105844140 | 105844958 | Rgs7bp        | ENSMUSG00000021719 | 461  | 0.07 | 0.26 | 0.09 | 0.19 | 0.09 | 0.14 |
| chr13 | 63673732  | 63674457  | Ptch1         | ENSMUSG00000021466 | 380  | 0.14 | 0.13 | 0.08 | 0.13 | 0.14 | 0.14 |
| chr13 | 95054841  | 95055798  | Scamp1        | ENSMUSG00000021687 | 465  | 0.15 | 0.29 | 0.11 | 0.11 | 0.16 | 0.13 |
| chr13 | 101545400 | 101545927 | Cenph         | ENSMUSG00000045273 | 75   | 0.17 | 0.2  | 0.17 | 0.24 | 0.2  | 0.13 |
| chr13 | 58316612  | 58317428  | Ubqln1        | ENSMUSG00000005312 | -23  | 0.07 | 0.15 | 0.08 | 0.12 | 0.08 | 0.14 |
| chr13 | 98010771  | 98011847  | Enc1          | ENSMUSG00000041773 | 249  | 0.1  | 0.11 | 0.09 | 0.16 | 0.11 | 0.14 |
| chr13 | 55050051  | 55051422  | Unc5a         | ENSMUSG00000025876 | -36  | 0.1  | 0.14 | 0.1  | 0.14 | 0.1  | 0.1  |
| chr13 | 81921995  | 81922975  | Cetn3         | ENSMUSG00000021537 | 194  | 0.09 | 0.18 | 0.2  | 0.08 | 0.1  | 0.19 |
| chr13 | 92901175  | 92901935  | Rasgrf2       | ENSMUSG00000021708 | -106 | 0.1  | 0.16 | 0.11 | 0.14 | 0.09 | 0.18 |
| chr13 | 94944059  | 94944637  | Lhfp12        | ENSMUSG00000045312 | 401  | 0.15 | 0.5  | 0.19 | 0.17 | 0.12 | 0.15 |
| chr13 | 12349927  | 12350550  | Mtr           | ENSMUSG00000021311 | 29   | 0.22 | 0.19 | 0.21 | 0.11 | 0.19 | 0.17 |
| chr13 | 25029091  | 25029511  | 9330162012Rik | ENSMUSG00000086448 | 31   | 0.1  | 0.07 | 0.07 | 0.13 | 0.09 | 0.14 |
| chr13 | 37949211  | 37949819  | Rreb1         | ENSMUSG00000039087 | -288 | 0.21 | 0.31 | 0.11 | 0.09 | 0.19 | 0.18 |
| chr13 | 91946854  | 91947324  | Zcchc9        | ENSMUSG00000021621 | 212  | 0.18 | 0.21 | 0.14 | 0.13 | 0.18 | 0.17 |
| chr13 | 115248766 | 115249922 | Fst           | ENSMUSG00000021765 | -406 | 0.11 | 0.1  | 0.12 | 0.18 | 0.1  | 0.12 |
| chr13 | 24892962  | 24893819  | BC005537      | ENSMUSG00000019132 | -136 | 0.08 | 0.12 | 0.08 | 0.18 | 0.09 | 0.13 |
| chr13 | 74199440  | 74199820  | Cep72         | ENSMUSG00000021572 | 103  | 0.08 | 0.17 | 0.07 | 0.19 | 0.03 | 0.13 |
| chr13 | 19714894  | 19715152  | Sfrp4         | ENSMUSG00000021319 | 50   | 0.17 | 0.5  | 0.08 | 0.14 | 0.07 | 0.21 |
| chr13 | 69877466  | 69878948  | Ube2ql1       | ENSMUSG00000052981 | 568  | 0.1  | 0.12 | 0.12 | 0.18 | 0.1  | 0.11 |
| chr13 | 81102147  | 81102407  | 9330111N05Rik | ENSMUSG00000085266 | 128  | 0.11 | 0.08 | 0.11 | 0.08 | 0.06 | 0.1  |
| chr13 | 51503937  | 51504459  | S1pr3         | ENSMUSG00000067586 | 211  | 0.25 | NA   | 0.18 | 0.1  | 0.33 | 0.19 |
| chr13 | 3916969   | 3917520   | Net1          | ENSMUSG00000021215 | 222  | 0.27 | 0.33 | 0.15 | 0.11 | 0.25 | 0.15 |
| chr13 | 10359448  | 10359905  | Gm16950       | ENSMUSG00000086178 | 951  | 0.15 | 0.24 | 0.1  | 0.19 | 0.11 | 0.17 |
| chr13 | 12487750  | 12488072  | Heatr1        | ENSMUSG00000050244 | 246  | 0.33 | NA   | 0.08 | 0.21 | 1    | 0.23 |

|       |          |          |               |                     |      |      |      |      |      |      |      |
|-------|----------|----------|---------------|---------------------|------|------|------|------|------|------|------|
| chr13 | 19711110 | 19711634 | Epdr1         | ENSMUSG00000002808  | 327  | 0.6  | 1    | 0.41 | 0.14 | 0.67 | 0.38 |
| chr13 | 20087580 | 20087789 | Gm5446        | ENSMUSG000000050243 | -12  | 1    | 1    | 1    | 1    | 0.96 | 0.85 |
| chr13 | 21494321 | 21494607 | Zkscan3       | ENSMUSG000000021327 | 75   | 1    | 0.11 | 1    | 1    | 0.86 | 0.42 |
| chr13 | 23555993 | 23556363 | Btn1a1        | ENSMUSG00000000706  | 1566 | 0.07 | 0.05 | 0.1  | 0.13 | 0.08 | 0.16 |
| chr13 | 24893948 | 24894218 | BC005537      | ENSMUSG000000019132 | 194  | 0.11 | 0.14 | 0.15 | 0.19 | 0.13 | 0.27 |
| chr13 | 24936923 | 24937209 | D130043K22Rik | ENSMUSG000000006711 | 62   | 1    | NA   | 1    | NA   | 0.5  | 1    |
| chr13 | 37869851 | 37870856 | Rreb1         | ENSMUSG000000039087 | 84   | 1    | NA   | 0.07 | 0.16 | 1    | 0.27 |
| chr13 | 38726631 | 38727169 | Muted         | ENSMUSG000000038982 | 61   | 0.25 | 0.33 | 0.09 | 0.19 | 0.25 | 0.11 |
| chr13 | 41095839 | 41096055 | Pak1ip1       | ENSMUSG000000038683 | -445 | 1    | 1    | 0.19 | 0.23 | 1    | 0.26 |
| chr13 | 41111614 | 41112004 | Tmem14c       | ENSMUSG000000021361 | 190  | 0.1  | 0.06 | 0.07 | 0.12 | 0.09 | 0.15 |
| chr13 | 49343093 | 49343648 | Susd3         | ENSMUSG000000021384 | 153  | 0.35 | 0.25 | 0.5  | 0.71 | 0.36 | 0.27 |
| chr13 | 50513165 | 50513490 | Fbxw17        | ENSMUSG000000037816 | 94   | 0.25 | 0.3  | 0.12 | 0.19 | 0.26 | 0.14 |
| chr13 | 51266675 | 51266953 | Nxn12         | ENSMUSG000000021396 | 420  | 0.2  | 0.11 | 0.13 | 0.13 | 0.1  | 0.13 |
| chr13 | 51943393 | 51943621 | Gadd45g       | ENSMUSG000000021453 | 1394 | 0.09 | 0.07 | 0.13 | 0.12 | 0.07 | 0.14 |
| chr13 | 54472745 | 54473296 | Cplx2         | ENSMUSG000000025867 | 307  | 0.07 | 0.13 | 0.1  | 0.14 | 0.07 | 0.16 |
| chr13 | 55516181 | 55516491 | Pfn3          | ENSMUSG000000044444 | 191  | 0.44 | 0.73 | 0.14 | 0.14 | 0.43 | 0.28 |
| chr13 | 55637605 | 55638247 | Ddx41         | ENSMUSG000000021494 | 93   | 0.11 | 0.09 | 0.1  | 0.24 | 0.06 | 0.17 |
| chr13 | 55694402 | 55694875 | Tmed9         | ENSMUSG000000058569 | 142  | 0.32 | 0.17 | 0.09 | 0.17 | 0.3  | 0.23 |
| chr13 | 55701375 | 55701582 | B4galt7       | ENSMUSG000000021504 | 52   | 0.08 | 0.16 | 0.1  | 0.07 | 0.09 | 0.09 |
| chr13 | 55828533 | 55828909 | Pcbd2         | ENSMUSG000000021496 | -8   | 0.12 | 0.2  | 0.1  | 0.12 | 0.13 | 0.12 |
| chr13 | 56623588 | 56624177 | Fbxl21        | ENSMUSG000000035509 | 49   | 0.21 | 0.38 | 0.11 | 0.25 | 0.23 | 0.22 |
| chr13 | 63066092 | 63066597 | 2010111101Rik | ENSMUSG000000021458 | 91   | 0.05 | 0.03 | 0.07 | 0.06 | 0.06 | 0.12 |
| chr13 | 63532789 | 63533151 | Fancc         | ENSMUSG000000021461 | 21   | 0.29 | 0.1  | 0.06 | 0.14 | 0.2  | 0.24 |
| chr13 | 63916417 | 63916977 | 0610007P08Rik | ENSMUSG000000021470 | 149  | 0.14 | 0.07 | 0.11 | 0.07 | 0.09 | 0.13 |
| chr13 | 67653875 | 67654135 | Zfp748        | ENSMUSG000000069204 | -33  | 0.1  | NA   | 0.15 | 0.27 | 0.11 | 0.32 |
| chr13 | 74777272 | 74777619 | Erap1         | ENSMUSG000000021583 | 125  | 0.19 | 0.1  | 0.07 | 0.2  | 0.16 | 0.12 |
| chr13 | 76193015 | 76194157 | Gpr150        | ENSMUSG000000045509 | 858  | 0.14 | 0.5  | 0.11 | 0.2  | 0.13 | 0.22 |
| chr13 | 81022290 | 81022613 | Arrdc3        | ENSMUSG000000074794 | -194 | 0.09 | 0.15 | 0.11 | 0.11 | 0.1  | 0.08 |
| chr13 | 91062679 | 91063240 | Rps23         | ENSMUSG000000049517 | 232  | 0.19 | 0.2  | 0.12 | 0.17 | 0.16 | 0.16 |
| chr13 | 93124659 | 93125433 | Dhfr          | ENSMUSG000000021707 | 308  | 0.15 | 0.15 | 0.11 | 0.14 | 0.13 | 0.14 |

|       |           |           |         |                    |      |      |      |      |      |      |      |
|-------|-----------|-----------|---------|--------------------|------|------|------|------|------|------|------|
| chr13 | 93564661  | 93564941  | Thbs4   | ENSMUSG00000021702 | -28  | 0.14 | 0.12 | 0.07 | 0.16 | 0.1  | 0.12 |
| chr13 | 93961895  | 93962584  | Papd4   | ENSMUSG00000042167 | -1   | 0.16 | 0.17 | 0.08 | 0.17 | 0.16 | 0.11 |
| chr13 | 95646943  | 95647485  | Otp     | ENSMUSG00000021685 | 1632 | 0.1  | 0.34 | 0.17 | 0.2  | 0.11 | 0.16 |
| chr13 | 96901071  | 96901357  | Sv2c    | ENSMUSG00000051111 | 1318 | 0.17 | NA   | 0.11 | 0.21 | 0.07 | 0.08 |
| chr13 | 96902324  | 96902768  | Sv2c    | ENSMUSG00000051111 | -14  | 0.12 | 0.11 | 0.14 | 0.21 | 0.14 | 0.12 |
| chr13 | 99032803  | 99033446  | Utp15   | ENSMUSG00000041747 | -177 | 0.18 | 0.08 | 0.11 | 0.23 | 0.18 | 0.12 |
| chr13 | 99464804  | 99465141  | Tmem171 | ENSMUSG00000052485 | -183 | 0.11 | 0.4  | 0.1  | 0.17 | 0.11 | 0.14 |
| chr13 | 101500667 | 101501010 | Cdk7    | ENSMUSG00000069089 | 46   | 0.14 | 0.24 | 0.14 | 0.15 | 0.11 | 0.14 |
| chr13 | 101514093 | 101514562 | Mrps36  | ENSMUSG00000061474 | 216  | 0.13 | 0.19 | 0.1  | 0.11 | 0.11 | 0.16 |
| chr13 | 104899430 | 104900112 | Nln     | ENSMUSG00000021710 | -77  | 0.08 | 0.18 | 0.16 | 0.19 | 0.06 | 0.13 |
| chr13 | 104968779 | 104969200 | Trim23  | ENSMUSG00000021712 | 112  | 0.67 | 1    | 0.07 | 0.18 | 0.69 | 0.15 |
| chr13 | 105018604 | 105019280 | Ppwd1   | ENSMUSG00000021713 | -19  | 0.14 | 0.4  | 0.13 | 0.15 | 0.12 | 0.26 |
| chr13 | 105607108 | 105607414 | Cwc27   | ENSMUSG00000021715 | -39  | 0.09 | 0.08 | 0.15 | 0.22 | 0.2  | 0.22 |
| chr13 | 105653646 | 105653886 | Fam159b | ENSMUSG00000042655 | 207  | 0.22 | 1    | 0.13 | 1    | 0.17 | 0.12 |
| chr13 | 106234716 | 106235223 | Htr1a   | ENSMUSG00000021721 | 1196 | 0.12 | 0.25 | 0.13 | 0.2  | 0.11 | 0.11 |
| chr13 | 107726633 | 107727244 | Ipo11   | ENSMUSG00000042590 | 57   | 0.12 | 0.21 | 0.13 | 0.14 | 0.11 | 0.2  |
| chr13 | 111184816 | 111185824 | Plk2    | ENSMUSG00000021701 | 68   | 0.12 | 0.11 | 0.12 | 0.14 | 0.13 | 0.12 |
| chr13 | 112515085 | 112516147 | Gm15287 | ENSMUSG00000086480 | -109 | 0.2  | 0.19 | 0.19 | 0.19 | 0.22 | 0.19 |
| chr13 | 113779823 | 113780123 | Ccno    | ENSMUSG00000042417 | 1963 | 0.11 | 0.19 | 0.21 | 0.14 | 0.12 | 0.17 |
| chr13 | 115177954 | 115178345 | Ndufs4  | ENSMUSG00000021764 | 153  | 0.12 | 0.14 | 0.09 | 0.2  | 0.08 | 0.11 |
| chr13 | 119175410 | 119176130 | Mrps30  | ENSMUSG00000021731 | 289  | 0.07 | 0.06 | 0.08 | 0.08 | 0.06 | 0.09 |
| chr13 | 119503107 | 119503320 | Fgf10   | ENSMUSG00000021732 | -293 | 0.15 | 0.29 | 0.13 | 0.1  | 0.12 | 0.11 |
| chr13 | 6547187   | 6547521   | Pitrm1  | ENSMUSG00000021193 | -49  | NA   | 1    | 0.5  | 0.2  | NA   | 0.46 |
| chr13 | 6647759   | 6648092   | Pfkip   | ENSMUSG00000021196 | 46   | NA   | 0.08 | 0.08 | 0.43 | 0.52 | 0.18 |
| chr13 | 12794348  | 12795145  | Gm2399  | ENSMUSG00000078141 | 117  | NA   | 0.5  | 0.12 | 0.13 | NA   | 0.19 |
| chr13 | 13324973  | 13325228  | Gm2423  | ENSMUSG00000061724 | 62   | NA   | NA   | 1    | NA   | NA   | NA   |
| chr13 | 13529688  | 13530485  | Nid1    | ENSMUSG0000005397  | 217  | NA   | 0.33 | 0.04 | 0.15 | NA   | 0.34 |
| chr13 | 14705231  | 14705776  | Mrpl32  | ENSMUSG00000015672 | -199 | NA   | NA   | 0.21 | 0.5  | 0.14 | 0.4  |
| chr13 | 21454659  | 21454900  | Zscan12 | ENSMUSG00000036721 | 83   | NA   | 0.32 | 0.13 | 0.28 | 0.09 | 0.16 |
| chr13 | 21532616  | 21532908  | Pgbd1   | ENSMUSG00000055313 | 8    | NA   | 0.33 | 0.09 | 0.5  | 0.14 | 0.17 |

|       |          |          |           |                    |      |      |      |      |      |      |      |
|-------|----------|----------|-----------|--------------------|------|------|------|------|------|------|------|
| chr13 | 21560064 | 21560501 | Nkapl     | ENSMUSG00000059395 | 88   | NA   | 0.11 | NA   | NA   | NA   | NA   |
| chr13 | 21622625 | 21622960 | Zfp192    | ENSMUSG00000063894 | 109  | NA   | NA   | 0.11 | 0.18 | NA   | 0.11 |
| chr13 | 21807673 | 21808612 | Hist1h2bl | ENSMUSG00000069314 | -130 | NA   | NA   | NA   | 1    | NA   | NA   |
| chr13 | 21809516 | 21809924 | Hist1h3h  | ENSMUSG00000069312 | 223  | NA   | NA   | 0.25 | NA   | 0.25 | 1    |
| chr13 | 21813366 | 21814320 | Hist1h2aj | ENSMUSG00000080076 | -166 | 1    | NA   | 1    | NA   | NA   | 1    |
| chr13 | 21826837 | 21827284 | Hist1h4j  | ENSMUSG00000067455 | 157  | NA   | NA   | 0.26 | NA   | NA   | 0.09 |
| chr13 | 21845374 | 21845663 | Hist1h2ak | ENSMUSG00000063021 | 258  | NA   | 0.5  | NA   | 1    | NA   | NA   |
| chr13 | 21872254 | 21872582 | Hist1h1b  | ENSMUSG00000058773 | 76   | 0.67 | NA   | 0.15 | 0.11 | NA   | 0.12 |
| chr13 | 21874831 | 21875233 | Hist1h3i  | ENSMUSG00000075032 | 234  | NA   | NA   | NA   | NA   | NA   | 1    |
| chr13 | 21878723 | 21879722 | Hist1h2an | ENSMUSG00000069309 | -135 | NA   | NA   | NA   | NA   | NA   | 1    |
| chr13 | 21923720 | 21923986 | Hist1h4n  | ENSMUSG00000069305 | 212  | NA   | NA   | NA   | NA   | NA   | 1    |
| chr13 | 22097769 | 22098169 | Prss16    | ENSMUSG00000006179 | 315  | NA   | 1    | 0.62 | 1    | NA   | 0.08 |
| chr13 | 22127099 | 22128094 | Hist1h2ah | ENSMUSG00000069302 | -84  | 1    | 1    | NA   | NA   | NA   | 0.25 |
| chr13 | 22132885 | 22133329 | Hist1h4i  | ENSMUSG00000060639 | 114  | 0.5  | 0.75 | 0.35 | NA   | NA   | 0.5  |
| chr13 | 22134474 | 22135453 | Hist1h2ag | ENSMUSG00000069301 | -145 | NA   | 0.07 | 0.19 | 0.5  | 0.04 | 0.23 |
| chr13 | 23622992 | 23623681 | Hist1h4h  | ENSMUSG00000060981 | 417  | NA   | NA   | 1    | NA   | NA   | NA   |
| chr13 | 23627154 | 23627711 | Hist1h3g  | ENSMUSG00000062417 | 141  | NA   | NA   | 0.37 | 1    | 1    | 0.18 |
| chr13 | 23634882 | 23635144 | Hist1h2bh | ENSMUSG00000064168 | 215  | NA   | 0.21 | 0.15 | 0.09 | NA   | 0.24 |
| chr13 | 23636359 | 23636801 | Hist1h3f  | ENSMUSG00000059309 | 659  | NA   | NA   | 0.61 | 0.33 | NA   | NA   |
| chr13 | 23665720 | 23666661 | Hist1h2bf | ENSMUSG00000069268 | -125 | NA   | NA   | NA   | 0.21 | 0.07 | 0.18 |
| chr13 | 23667676 | 23668078 | Hist1h3d  | ENSMUSG00000062808 | 245  | NA   | 0.11 | 0.1  | NA   | 0.09 | 0.23 |
| chr13 | 23673479 | 23673785 | Hist1h4d  | ENSMUSG00000061482 | 165  | 0.06 | NA   | NA   | NA   | NA   | 1    |
| chr13 | 23789992 | 23790277 | Hist1h4c  | ENSMUSG00000060678 | 189  | 0.75 | 0.5  | 0.2  | 0.6  | NA   | 0.24 |
| chr13 | 23830577 | 23831209 | Hist1h1c  | ENSMUSG00000036181 | 217  | NA   | 0.6  | 0.22 | 1    | 0.57 | 0.3  |
| chr13 | 23836969 | 23837360 | Hist1h3c  | ENSMUSG00000069310 | 307  | NA   | NA   | 0.12 | 0.19 | NA   | 0.09 |
| chr13 | 23838104 | 23838345 | Gm11336   | ENSMUSG00000080999 | 144  | NA   | NA   | NA   | NA   | 1    | NA   |
| chr13 | 23842994 | 23843323 | Hist1h2ab | ENSMUSG00000061615 | 201  | NA   | NA   | NA   | NA   | NA   | 0.33 |
| chr13 | 23844254 | 23844643 | Hist1h3b  | ENSMUSG00000069267 | 312  | 1    | NA   | NA   | NA   | NA   | NA   |
| chr13 | 23855589 | 23855805 | Hist1h1a  | ENSMUSG00000049539 | 160  | NA   | NA   | NA   | NA   | NA   | 1    |
| chr13 | 25147052 | 25147391 | Dcdc2a    | ENSMUSG00000035910 | -652 | NA   | 0.11 | 0.07 | 0.15 | 0.12 | 0.22 |

|       |          |          |               |                     |       |      |      |      |      |      |      |
|-------|----------|----------|---------------|---------------------|-------|------|------|------|------|------|------|
| chr13 | 30842438 | 30842650 | Irf4          | ENSMUSG00000021356  | 1449  | 0.2  | 0.06 | 0.12 | 0.31 | NA   | 0.16 |
| chr13 | 34254804 | 34255173 | Psmg4         | ENSMUSG00000071451  | 155   | NA   | NA   | NA   | 1    | NA   | 0.56 |
| chr13 | 34966065 | 34966433 | Prpf4b        | ENSMUSG00000021413  | -1114 | NA   | NA   | 1    | NA   | NA   | 0.48 |
| chr13 | 36827887 | 36828090 | Nrn1          | ENSMUSG00000039114  | -1642 | NA   | NA   | 1    | NA   | NA   | NA   |
| chr13 | 38750418 | 38751054 | Eef1e1        | ENSMUSG00000001707  | 161   | NA   | 1    | 0.1  | 0.2  | 0.13 | 0.16 |
| chr13 | 40823678 | 40824142 | Gm16989       | ENSMUSG00000087310  | 733   | NA   | 0.4  | 0.1  | 0.21 | 0.11 | 0.15 |
| chr13 | 40828895 | 40829176 | Tfap2a        | ENSMUSG00000021359  | 157   | NA   | NA   | 0.5  | NA   | 1    | 0.75 |
| chr13 | 41454163 | 41454544 | Nedd9         | ENSMUSG00000021365  | 17    | NA   | NA   | 0.17 | 0.19 | 0.25 | 0.26 |
| chr13 | 43460804 | 43461012 | Sirt5         | ENSMUSG00000054021  | 26    | NA   | NA   | 0.15 | 0.1  | NA   | 0.14 |
| chr13 | 43880339 | 43880806 | Cd83          | ENSMUSG00000015396  | 96    | NA   | NA   | 0.5  | NA   | NA   | 0.25 |
| chr13 | 49777415 | 49777665 | Iars          | ENSMUSG00000037851  | 71    | NA   | NA   | NA   | NA   | NA   | 0.33 |
| chr13 | 53024676 | 53025150 | Auh           | ENSMUSG00000021460  | -86   | 0.72 | 0.47 | 0.07 | 0.16 | NA   | 0.1  |
| chr13 | 54287396 | 54287714 | Hrh2          | ENSMUSG00000034987  | 57    | NA   | 0.33 | 0.25 | NA   | NA   | 0.15 |
| chr13 | 54691230 | 54691434 | Nop16         | ENSMUSG00000025869  | 5     | NA   | 0.5  | 0.06 | 0.18 | 0.17 | 0.22 |
| chr13 | 55097727 | 55097933 | Unc5a         | ENSMUSG00000025876  | -70   | NA   | NA   | 1    | NA   | NA   | 0.93 |
| chr13 | 55430844 | 55431052 | Mxd3          | ENSMUSG00000021485  | 146   | NA   | NA   | 0.2  | NA   | NA   | NA   |
| chr13 | 55463496 | 55464326 | Lman2         | ENSMUSG00000021484  | 233   | NA   | 0.86 | 0.13 | 0.15 | 0.29 | 0.26 |
| chr13 | 55724296 | 55724644 | Cam1          | ENSMUSG00000021501  | 104   | 0.38 | 0.33 | 0.2  | 0.22 | NA   | 0.17 |
| chr13 | 55815951 | 55816389 | Txndc15       | ENSMUSG00000021497  | 159   | NA   | 0.7  | 0.11 | 0.23 | 0.46 | 0.15 |
| chr13 | 55936853 | 55937100 | Pitx1         | ENSMUSG00000021506  | 577   | NA   | NA   | NA   | NA   | NA   | 0.78 |
| chr13 | 56710825 | 56711278 | Tgfb1         | ENSMUSG00000035493  | 131   | NA   | 1    | 0.33 | NA   | NA   | 1    |
| chr13 | 58907778 | 58908441 | Ntrk2         | ENSMUSG000000055254 | 152   | NA   | 0.31 | 0.16 | 0.15 | 0.1  | 0.19 |
| chr13 | 65213819 | 65214309 | Hiatl1        | ENSMUSG00000038212  | 219   | NA   | 0.26 | 0.11 | NA   | NA   | 0.24 |
| chr13 | 66108543 | 66108779 | Gm6910        | ENSMUSG000000055763 | -10   | NA   | NA   | 0.5  | 0.5  | NA   | NA   |
| chr13 | 74454752 | 74455105 | Pdcd6         | ENSMUSG00000021576  | -154  | NA   | NA   | NA   | NA   | NA   | 0.14 |
| chr13 | 74945802 | 74946060 | Cast          | ENSMUSG00000021585  | 27    | NA   | NA   | 0.13 | 0.14 | 0.11 | 0.14 |
| chr13 | 76155736 | 76156207 | Rfesd         | ENSMUSG00000043190  | 39    | NA   | 0.33 | 0.25 | NA   | NA   | 0.21 |
| chr13 | 78342399 | 78342952 | A830082K12Rik | ENSMUSG00000087143  | 861   | NA   | 1    | 0.1  | 0.18 | 0.15 | 0.36 |
| chr13 | 81771822 | 81772144 | Gpr98         | ENSMUSG00000069170  | 155   | NA   | NA   | NA   | 0.3  | 0.08 | 0.33 |
| chr13 | 85328935 | 85329271 | Ccnh          | ENSMUSG00000021548  | 90    | NA   | 1    | 0.25 | 0.53 | 0.21 | 0.38 |

|       |           |           |               |                    |      |      |      |      |      |      |      |
|-------|-----------|-----------|---------------|--------------------|------|------|------|------|------|------|------|
| chr13 | 89878971  | 89879422  | Gm4117        | ENSMUSG00000089940 | 131  | NA   | 0.82 | 0.34 | 0.2  | 0.73 | 0.18 |
| chr13 | 97907624  | 97908221  | Nsa2          | ENSMUSG00000060739 | -41  | NA   | 0.15 | 0.16 | 0.2  | 0.5  | 0.19 |
| chr13 | 98975742  | 98976433  | Rgnef         | ENSMUSG00000021662 | 33   | NA   | 0.37 | 0.15 | 0.11 | 0.11 | 0.15 |
| chr13 | 101556243 | 101556690 | Ccnb1         | ENSMUSG00000041431 | -109 | 0.2  | 0.12 | 0.19 | 0.27 | NA   | 0.15 |
| chr14 | 75346657  | 75347745  | Lrch1         | ENSMUSG00000068015 | 483  | 0.38 | 0.27 | 0.11 | 0.14 | 0.1  | 0.15 |
| chr14 | 33669821  | 33670521  | E130203B14Rik | ENSMUSG00000050666 | 229  | 1    | 0.16 | 0.21 | 0.28 | 0.29 | 0.2  |
| chr14 | 87815722  | 87817215  | Tdrd3         | ENSMUSG00000022019 | 78   | 0.16 | 0.14 | 0.08 | 0.08 | 0.06 | 0.11 |
| chr14 | 67854240  | 67855313  | Ebf2          | ENSMUSG00000022053 | 1295 | 0.39 | 0.23 | 0.13 | 0.1  | 0.1  | 0.18 |
| chr14 | 17197139  | 17198691  | Top2b         | ENSMUSG00000017485 | 222  | 0.19 | 0.17 | 0.1  | 0.13 | 0.06 | 0.16 |
| chr14 | 35486555  | 35487966  | Wapal         | ENSMUSG00000041408 | 146  | 0.18 | 0.12 | 0.09 | 0.12 | 0.06 | 0.15 |
| chr14 | 76903954  | 76904402  | Tsc22d1       | ENSMUSG00000022010 | 157  | 0.47 | 0.17 | 0.12 | 0.08 | 0.1  | 0.17 |
| chr14 | 47501659  | 47504725  | Samd4         | ENSMUSG00000021838 | 663  | 0.42 | 0.45 | 0.14 | 0.17 | 0.2  | 0.17 |
| chr14 | 30534709  | 30536350  | Cacna2d3      | ENSMUSG00000021991 | -479 | 0.22 | 0.2  | 0.12 | 0.14 | 0.09 | 0.14 |
| chr14 | 62950739  | 62951273  | Rnaseh2b      | ENSMUSG00000021932 | 101  | 0.5  | 0.42 | 0.12 | 0.22 | 0.15 | 0.14 |
| chr14 | 61253442  | 61254053  | Spata13       | ENSMUSG00000021990 | 181  | 0.71 | 0.17 | 0.1  | 0.17 | 0.06 | 0.2  |
| chr14 | 73109019  | 73110477  | Fndc3a        | ENSMUSG00000033487 | -399 | 0.17 | 0.12 | 0.1  | 0.13 | 0.08 | 0.14 |
| chr14 | 69902256  | 69903270  | Slc25a37      | ENSMUSG00000034248 | 397  | 0.28 | 0.16 | 0.11 | 0.13 | 0.1  | 0.13 |
| chr14 | 77556099  | 77557644  | Enox1         | ENSMUSG00000022012 | 248  | 0.24 | 0.15 | 0.09 | 0.13 | 0.09 | 0.15 |
| chr14 | 21365068  | 21365823  | 1810062O18Rik | ENSMUSG00000084925 | 144  | 0.18 | 0.08 | 0.07 | 0.1  | 0.03 | 0.12 |
| chr14 | 80168260  | 80171226  | Pcdh8         | ENSMUSG00000036422 | 1376 | 0.19 | 0.19 | 0.11 | 0.13 | 0.1  | 0.17 |
| chr14 | 14793339  | 14794234  | Thoc7         | ENSMUSG00000053453 | -47  | 0.27 | 0.2  | 0.13 | 0.09 | 0.09 | 0.15 |
| chr14 | 52816309  | 52817334  | Supt16h       | ENSMUSG00000035726 | 93   | 0.37 | 0.27 | 0.15 | 0.2  | 0.16 | 0.21 |
| chr14 | 67487492  | 67488097  | Dpysl2        | ENSMUSG00000022048 | -269 | 0.62 | 0.22 | 0.16 | 0.13 | 0.06 | 0.13 |
| chr14 | 55050573  | 55051478  | Mmp14         | ENSMUSG00000000957 | 584  | 0.18 | 0.5  | 0.18 | 0.26 | 1    | 0.19 |
| chr14 | 32643056  | 32644347  | Ankrd28       | ENSMUSG00000014496 | -100 | 0.17 | 0.13 | 0.09 | 0.1  | 0.08 | 0.13 |
| chr14 | 57504294  | 57506156  | Zmym2         | ENSMUSG00000021945 | -265 | 0.28 | 0.24 | 0.09 | 0.15 | 0.12 | 0.14 |
| chr14 | 55732251  | 55734264  | Jph4          | ENSMUSG00000022208 | 1132 | 0.62 | 0.54 | 0.32 | 0.29 | 0.47 | 0.37 |
| chr14 | 33135109  | 33135334  | Ogdhl         | ENSMUSG00000021913 | 16   | 1    | 0.08 | NA   | 0.08 | 0.05 | 0.12 |
| chr14 | 15535221  | 15536295  | Slc4a7        | ENSMUSG00000021733 | 219  | 0.22 | 0.21 | 0.09 | 0.13 | 0.08 | 0.14 |
| chr14 | 33014585  | 33015656  | Timm23        | ENSMUSG00000013701 | -106 | 0.31 | 0.15 | 0.09 | 0.15 | 0.14 | 0.13 |



|       |           |           |               |                     |      |      |      |      |      |      |      |
|-------|-----------|-----------|---------------|---------------------|------|------|------|------|------|------|------|
| chr14 | 122506122 | 122506926 | A330035P11Rik | ENSMUSG00000085615  | -349 | 0.15 | 0.2  | 0.09 | 0.13 | 0.07 | 0.14 |
| chr14 | 56445379  | 56445754  | Nfatc4        | ENSMUSG00000023411  | 1934 | 0.81 | 0.83 | 0.23 | 0.37 | 0.3  | 0.34 |
| chr14 | 22318652  | 22320567  | Myst4         | ENSMUSG000000021767 | 533  | 0.16 | 0.21 | 0.11 | 0.17 | 0.09 | 0.13 |
| chr14 | 79248839  | 79249318  | 1300010F03Rik | ENSMUSG000000058997 | 93   | 0.15 | 0.18 | 0.11 | 0.1  | 0.06 | 0.11 |
| chr14 | 57021455  | 57021746  | Rnf17         | ENSMUSG000000000365 | 66   | 0.91 | 0.91 | 0.73 | 0.76 | 0.74 | 0.74 |
| chr14 | 77436146  | 77436708  | 9030625A04Rik | ENSMUSG000000044350 | 21   | 0.36 | 0.17 | 0.15 | 0.2  | 0.14 | 0.16 |
| chr14 | 27487903  | 27489625  | Pde12         | ENSMUSG000000043702 | 568  | 0.28 | 0.24 | 0.12 | 0.19 | 0.15 | 0.16 |
| chr14 | 68701738  | 68703001  | Nefl          | ENSMUSG00000022055  | 449  | 0.18 | 0.07 | 0.09 | 0.14 | 0.06 | 0.13 |
| chr14 | 78707556  | 78707837  | Tnfsf11       | ENSMUSG000000022015 | 0    | 0.36 | 0.19 | 0.1  | 0.13 | 0.13 | 0.17 |
| chr14 | 87540763  | 87541168  | Diap3         | ENSMUSG000000022021 | -44  | 0.22 | 0.13 | 0.11 | 0.1  | 0.06 | 0.11 |
| chr14 | 33412539  | 33412853  | Prrxl1        | ENSMUSG000000041730 | 102  | 0.2  | 0.1  | 0.09 | 0.06 | 0.06 | 0.1  |
| chr14 | 47000182  | 47000388  | Gm15217       | ENSMUSG000000079261 | -517 | 0.12 | 1    | 0.73 | 1    | 0.9  | 1    |
| chr14 | 29318930  | 29319923  | Wnt5a         | ENSMUSG000000021994 | 340  | 0.44 | 0.35 | 0.13 | 0.17 | 0.16 | 0.23 |
| chr14 | 99444723  | 99445715  | Mzt1          | ENSMUSG000000033186 | 136  | 0.22 | 0.17 | 0.13 | 0.11 | 0.1  | 0.12 |
| chr14 | 32898425  | 32898994  | Dph3          | ENSMUSG000000021905 | -237 | 0.22 | 0.22 | 0.1  | 0.12 | 0.08 | 0.2  |
| chr14 | 28241743  | 28242859  | D14Abb1e      | ENSMUSG000000040651 | 268  | 0.23 | 0.1  | 0.11 | 0.13 | 0.08 | 0.13 |
| chr14 | 71165718  | 71166809  | Dok2          | ENSMUSG000000022102 | 420  | 0.34 | 0.21 | 0.1  | 0.16 | 0.15 | 0.17 |
| chr14 | 27457376  | 27458105  | Arf4          | ENSMUSG000000021877 | 180  | 0.29 | 0.19 | 0.11 | 0.15 | 0.06 | 0.13 |
| chr14 | 122277533 | 122278385 | Ubac2         | ENSMUSG000000041765 | 131  | 0.34 | 0.38 | 0.17 | 0.16 | 0.16 | 0.22 |
| chr14 | 49065914  | 49066379  | 6720456H20Rik | ENSMUSG000000036339 | 119  | 0.52 | 0.24 | 0.2  | 0.17 | 0.19 | 0.18 |
| chr14 | 62058145  | 62059193  | Kpna3         | ENSMUSG000000021929 | 115  | 0.15 | 0.19 | 0.08 | 0.12 | 0.09 | 0.09 |
| chr14 | 124025948 | 124026315 | Nalcn         | ENSMUSG000000000197 | 235  | 0.17 | NA   | 0.08 | 0.42 | 0.67 | 0.1  |
| chr14 | 52533421  | 52533639  | Ndrp2         | ENSMUSG000000004558 | -367 | 0.36 | 0.06 | 0.11 | 0.18 | 0.04 | 0.11 |
| chr14 | 26426218  | 26427681  | Zmiz1         | ENSMUSG000000007817 | 106  | 0.16 | 0.12 | 0.08 | 0.11 | 0.08 | 0.1  |
| chr14 | 35123453  | 35124646  | Fam35a        | ENSMUSG000000041471 | -360 | 0.17 | 0.14 | 0.11 | 0.16 | 0.09 | 0.13 |
| chr14 | 99697653  | 99698663  | Klf5          | ENSMUSG000000005148 | 248  | 0.36 | 0.42 | 0.13 | 0.14 | 0.19 | 0.14 |
| chr14 | 76153844  | 76154447  | Cog3          | ENSMUSG000000034893 | 155  | 0.19 | 0.11 | 0.1  | 0.1  | 0.06 | 0.17 |
| chr14 | 105657873 | 105658371 | Ndfip2        | ENSMUSG000000053253 | 194  | 0.07 | 0.22 | 0.08 | 0.1  | 0.23 | 0.12 |
| chr14 | 103469383 | 103469775 | Cln5          | ENSMUSG000000022125 | 146  | 0.13 | 0.08 | 0.1  | 0.13 | 0.06 | 0.14 |
| chr14 | 48740511  | 48741399  | Peli2         | ENSMUSG000000021846 | 411  | 0.1  | 0.14 | 0.13 | 0.13 | 0.18 | 0.18 |

|       |           |           |               |                    |       |      |      |      |      |      |      |
|-------|-----------|-----------|---------------|--------------------|-------|------|------|------|------|------|------|
| chr14 | 49792227  | 49792947  | Naa30         | ENSMUSG00000036282 | 314   | 0.2  | 0.12 | 0.12 | 0.15 | 0.07 | 0.11 |
| chr14 | 70552983  | 70553684  | 2610301G19Rik | ENSMUSG00000033712 | 285   | 0.16 | 0.17 | 0.09 | 0.15 | 0.08 | 0.15 |
| chr14 | 57429920  | 57431643  | Zmym5         | ENSMUSG00000040123 | -480  | 0.2  | 0.31 | 0.09 | 0.1  | 0.11 | 0.16 |
| chr14 | 26587898  | 26588860  | Zcchc24       | ENSMUSG00000055538 | -37   | 0.39 | 0.31 | 0.1  | 0.13 | 0.24 | 0.15 |
| chr14 | 31292500  | 31293180  | Dcp1a         | ENSMUSG00000021962 | 89    | 0.32 | 0.11 | 0.1  | 0.12 | 0.11 | 0.14 |
| chr14 | 52604247  | 52604771  | Arhgef40      | ENSMUSG0000004562  | 1     | 0.12 | 0.31 | 0.11 | 0.2  | 0.27 | 0.17 |
| chr14 | 56340688  | 56341142  | Rabggta       | ENSMUSG00000040472 | 98    | 1    | 0.37 | 0.09 | 0.16 | 0.24 | 0.26 |
| chr14 | 60705472  | 60705740  | Atp8a2        | ENSMUSG00000021983 | 65    | 0.72 | 0.59 | 0.32 | 0.42 | 0.57 | 0.3  |
| chr14 | 58364221  | 58365282  | Lats2         | ENSMUSG00000021959 | 189   | 0.18 | 0.13 | 0.1  | 0.13 | 0.11 | 0.17 |
| chr14 | 103380644 | 103382249 | Kctd12        | ENSMUSG00000048107 | 299   | 0.15 | 0.14 | 0.09 | 0.12 | 0.09 | 0.1  |
| chr14 | 37781473  | 37782080  | Gcap14        | ENSMUSG00000058690 | 174   | 0.14 | 0.11 | 0.09 | 0.11 | 0.08 | 0.1  |
| chr14 | 45970692  | 45971406  | Styx          | ENSMUSG00000053205 | 195   | 1    | 0.6  | 0.1  | 0.23 | 0.36 | 0.16 |
| chr14 | 47993393  | 47993877  | Lgals3        | ENSMUSG00000050335 | 147   | 0.28 | 0.29 | 0.08 | 0.22 | 0.1  | 0.12 |
| chr14 | 104921367 | 104921984 | Rnf219        | ENSMUSG00000022120 | 208   | 0.21 | 0.13 | 0.15 | 0.17 | 0.11 | 0.18 |
| chr14 | 49284617  | 49285247  | Otx2          | ENSMUSG00000021848 | -11   | 0.06 | 0.13 | 0.12 | 0.16 | 0.16 | 0.27 |
| chr14 | 70204936  | 70205320  | Rhobtb2       | ENSMUSG00000022075 | 209   | 0.22 | 0.16 | 0.09 | 0.16 | 0.11 | 0.23 |
| chr14 | 34791843  | 34792062  | Zfp488        | ENSMUSG00000044519 | -2    | 0.44 | 0.15 | 0.08 | 0.12 | 0.12 | 0.12 |
| chr14 | 119498175 | 119498814 | Gm16835       | ENSMUSG00000087479 | 307   | 0.38 | 0.1  | 0.09 | 0.13 | 0.18 | 0.14 |
| chr14 | 28435441  | 28436045  | Erc2          | ENSMUSG00000040640 | 129   | 0.16 | 0.09 | 0.08 | 0.12 | 0.05 | 0.13 |
| chr14 | 56178789  | 56179567  | Dcaf11        | ENSMUSG00000022214 | 335   | 0.29 | 0.11 | 0.08 | 0.1  | 0.08 | 0.18 |
| chr14 | 62266722  | 62268224  | Dleu2         | ENSMUSG00000087313 | 177   | 0.21 | 0.13 | 0.11 | 0.19 | 0.12 | 0.12 |
| chr14 | 115439551 | 115441625 | Mir17hg       | ENSMUSG00000089726 | -1513 | 0.2  | 0.27 | 0.1  | 0.13 | 0.15 | 0.12 |
| chr14 | 122862651 | 122864508 | Zic5          | ENSMUSG00000041703 | 1320  | 0.23 | 0.28 | 0.12 | 0.16 | 0.16 | 0.17 |
| chr14 | 55236368  | 55236959  | Psmb5         | ENSMUSG00000022193 | 169   | 0.21 | 0.11 | 0.14 | 0.18 | 0.09 | 0.21 |
| chr14 | 47808549  | 47809203  | Gch1          | ENSMUSG00000037580 | 212   | 0.18 | 0.16 | 0.06 | 0.12 | 0.11 | 0.14 |
| chr14 | 56983532  | 56984178  | Atp12a        | ENSMUSG00000022229 | -50   | 0.2  | 0.08 | 0.09 | 0.13 | 0.1  | 0.14 |
| chr14 | 19163567  | 19164489  | Ube2e1        | ENSMUSG00000021774 | -417  | 0.15 | 0.14 | 0.08 | 0.11 | 0.09 | 0.11 |
| chr14 | 112074447 | 112075364 | Slitrk5       | ENSMUSG00000033214 | 568   | 0.14 | 0.12 | 0.13 | 0.2  | 0.07 | 0.15 |
| chr14 | 76410388  | 76410840  | Gtf2f2        | ENSMUSG00000067995 | 58    | 0.15 | 0.21 | 0.1  | 0.19 | 0.31 | 0.17 |
| chr14 | 31528155  | 31529970  | Sfmbt1        | ENSMUSG0000006527  | 709   | 0.17 | 0.15 | 0.1  | 0.13 | 0.11 | 0.13 |

|       |           |           |               |                    |       |      |      |      |      |      |      |
|-------|-----------|-----------|---------------|--------------------|-------|------|------|------|------|------|------|
| chr14 | 41779595  | 41780719  | Tspan14       | ENSMUSG00000037824 | -61   | 0.2  | 0.2  | 0.14 | 0.23 | 0.13 | 0.17 |
| chr14 | 60996943  | 60998112  | Fam123a       | ENSMUSG00000021986 | 443   | 0.19 | 0.11 | 0.12 | 0.12 | 0.08 | 0.2  |
| chr14 | 47007029  | 47008840  | Gm15222       | ENSMUSG00000086746 | 740   | 0.24 | 0.29 | 0.18 | 0.18 | 0.1  | 0.21 |
| chr14 | 70167287  | 70167743  | Tnfrsf10b     | ENSMUSG00000022074 | 236   | 0.52 | 0.49 | 0.09 | 0.19 | 0.26 | 0.15 |
| chr14 | 55194524  | 55196487  | Jub           | ENSMUSG00000022178 | 748   | 0.19 | 0.18 | 0.11 | 0.16 | 0.14 | 0.14 |
| chr14 | 70944935  | 70945414  | Reep4         | ENSMUSG00000033589 | -256  | 0.41 | 0.44 | 0.11 | 0.18 | 0.2  | 0.17 |
| chr14 | 33410725  | 33411437  | Prrxl1        | ENSMUSG00000041730 | -1513 | 0.14 | 0.12 | 0.1  | 0.15 | 0.08 | 0.14 |
| chr14 | 26276855  | 26277308  | Zmiz1         | ENSMUSG00000007817 | -1590 | 0.3  | 0.24 | 0.33 | 0.26 | 0.57 | 0.34 |
| chr14 | 63865202  | 63865567  | Gata4         | ENSMUSG00000021944 | -1276 | 1    | 0.46 | 0.12 | 0.34 | 0.29 | 0.2  |
| chr14 | 58283698  | 58284331  | Xpo4          | ENSMUSG00000021952 | -221  | 0.22 | 0.31 | 0.12 | 0.13 | 0.35 | 0.16 |
| chr14 | 27852062  | 27852807  | Il17rd        | ENSMUSG00000040717 | 247   | 0.18 | 0.07 | 0.09 | 0.1  | 0.08 | 0.1  |
| chr14 | 71289507  | 71289856  | Gfra2         | ENSMUSG00000022103 | -246  | 0.56 | 0.17 | 0.09 | 0.13 | 0.25 | 0.18 |
| chr14 | 119321805 | 119322380 | Dzip1         | ENSMUSG00000042156 | 297   | 0.27 | 0.28 | 0.31 | 0.38 | 0.2  | 0.37 |
| chr14 | 17075659  | 17075942  | Oxsm          | ENSMUSG00000021786 | 45    | 0.36 | 0.41 | 0.11 | 0.14 | 0.12 | 0.16 |
| chr14 | 119336771 | 119337764 | Dnajc3        | ENSMUSG00000022136 | 113   | 0.17 | 0.09 | 0.12 | 0.1  | 0.12 | 0.13 |
| chr14 | 49685508  | 49686215  | Exoc5         | ENSMUSG00000061244 | 210   | 0.22 | 0.3  | 0.13 | 0.16 | 0.15 | 0.18 |
| chr14 | 26661470  | 26662038  | Anxa11        | ENSMUSG00000021866 | 85    | 0.38 | 0.37 | 0.15 | 0.16 | 0.22 | 0.23 |
| chr14 | 40285404  | 40285685  | Nrg3          | ENSMUSG00000041014 | 410   | 0.21 | 0.1  | 0.09 | 0.24 | 0.1  | 0.09 |
| chr14 | 65880570  | 65881716  | Fzd3          | ENSMUSG00000007989 | 85    | 0.24 | 0.2  | 0.1  | 0.11 | 0.16 | 0.16 |
| chr14 | 51550036  | 51550988  | Tmem55b       | ENSMUSG00000035953 | -37   | 0.19 | 0.22 | 0.09 | 0.18 | 0.12 | 0.15 |
| chr14 | 62175136  | 62176232  | 6330409N04Rik | ENSMUSG00000021930 | -89   | 0.25 | 0.41 | 0.1  | 0.17 | 0.13 | 0.13 |
| chr14 | 70605482  | 70606041  | Gm16600       | ENSMUSG00000085557 | 630   | 0.17 | 0.31 | 0.19 | 0.17 | 0.1  | 0.17 |
| chr14 | 34132709  | 34133694  | Arhgap22      | ENSMUSG00000063506 | 312   | 0.15 | 0.12 | 0.08 | 0.11 | 0.11 | 0.11 |
| chr14 | 70499787  | 70500150  | Bin3          | ENSMUSG00000022089 | 16    | 0.09 | 0.16 | 0.12 | 0.15 | 0.17 | 0.18 |
| chr14 | 48092140  | 48092852  | Fbxo34        | ENSMUSG00000037536 | 260   | 0.21 | 0.09 | 0.14 | 0.11 | 0.09 | 0.2  |
| chr14 | 99498542  | 99499232  | Pibf1         | ENSMUSG00000022064 | 235   | 0.2  | 0.14 | 0.1  | 0.11 | 0.08 | 0.14 |
| chr14 | 21748188  | 21748995  | Vcl           | ENSMUSG00000021823 | -64   | 0.21 | 0.21 | 0.12 | 0.11 | 0.11 | 0.21 |
| chr14 | 46149170  | 46150141  | Fermt2        | ENSMUSG00000037712 | -194  | 0.28 | 0.13 | 0.1  | 0.17 | 0.18 | 0.12 |
| chr14 | 34164280  | 34164706  | Arhgap22      | ENSMUSG00000063506 | -5    | 0.14 | 0.2  | 0.1  | 0.14 | 0.09 | 0.13 |
| chr14 | 32149733  | 32150307  | Capn7         | ENSMUSG00000021893 | 196   | 0.14 | 0.21 | 0.07 | 0.13 | 0.09 | 0.12 |

|       |           |           |               |                    |      |      |      |      |      |      |      |
|-------|-----------|-----------|---------------|--------------------|------|------|------|------|------|------|------|
| chr14 | 65205869  | 65206695  | A930011O12Rik | ENSMUSG00000091456 | -670 | 0.25 | 0.1  | 0.13 | 0.12 | 1    | 0.18 |
| chr14 | 18492841  | 18493668  | Thrb          | ENSMUSG00000021779 | -220 | 0.19 | 0.1  | 0.09 | 0.13 | 0.14 | 0.14 |
| chr14 | 66456073  | 66456666  | Ccdc25        | ENSMUSG00000022035 | 230  | 0.25 | 0.27 | 0.16 | 0.11 | 0.41 | 0.19 |
| chr14 | 119324281 | 119324782 | Dzip1         | ENSMUSG00000042156 | 5    | 0.17 | 0.33 | 0.1  | 0.16 | 0.06 | 0.13 |
| chr14 | 60244050  | 60245244  | Shisa2        | ENSMUSG00000044461 | 529  | 0.12 | 0.12 | 0.1  | 0.11 | 0.08 | 0.1  |
| chr14 | 58042805  | 58043249  | Ift88         | ENSMUSG00000040040 | 128  | 0.33 | 0.16 | 0.1  | 0.13 | 0.09 | 0.13 |
| chr14 | 58690753  | 58691269  | Fgf9          | ENSMUSG00000021974 | -512 | 0.23 | 0.14 | 0.15 | 0.15 | 0.1  | 0.14 |
| chr14 | 117324599 | 117326149 | Gpc6          | ENSMUSG00000058571 | 722  | 0.13 | 0.14 | 0.17 | 0.2  | 0.18 | 0.17 |
| chr14 | 70930638  | 70930906  | Lgi3          | ENSMUSG00000033595 | 144  | 0.07 | 0.07 | 0.07 | 0.1  | 0.13 | 0.16 |
| chr14 | 79987035  | 79987581  | Sugt1         | ENSMUSG00000022024 | -190 | 0.19 | 0.15 | 0.15 | 0.15 | 0.11 | 0.08 |
| chr14 | 80061102  | 80061421  | Lect1         | ENSMUSG00000022025 | 630  | 0.5  | 0.26 | 0.26 | 0.44 | 0.25 | 0.4  |
| chr14 | 37948045  | 37948710  | Ghitm         | ENSMUSG00000041028 | -125 | 0.3  | 0.15 | 0.1  | 0.13 | 0.15 | 0.19 |
| chr14 | 56300251  | 56300955  | Tinf2         | ENSMUSG00000007589 | -21  | 0.06 | 0.14 | 0.13 | 0.22 | 0.27 | 0.21 |
| chr14 | 70688778  | 70689410  | Ppp3cc        | ENSMUSG00000022092 | 162  | 0.16 | 0.09 | 0.11 | 0.13 | 0.09 | 0.1  |
| chr14 | 56210378  | 56210931  | Rnf31         | ENSMUSG00000047098 | 109  | 0.18 | 0.22 | 0.11 | 0.14 | 0.08 | 0.14 |
| chr14 | 65695100  | 65695488  | Extl3         | ENSMUSG00000021978 | 1731 | 0.8  | 0.92 | 0.82 | 0.83 | 0.9  | 0.95 |
| chr14 | 19102996  | 19103976  | Rpl15         | ENSMUSG00000012405 | -346 | 0.16 | 0.22 | 0.09 | 0.16 | 0.11 | 0.13 |
| chr14 | 56109680  | 56110229  | Lrrc16b       | ENSMUSG00000022211 | 24   | 0.15 | 0.19 | 0.08 | 0.14 | 0.07 | 0.16 |
| chr14 | 104049237 | 104050190 | Slain1        | ENSMUSG00000055717 | 268  | 0.23 | 0.13 | 0.09 | 0.15 | 0.17 | 0.13 |
| chr14 | 21871158  | 21872274  | Ap3m1         | ENSMUSG00000021824 | -417 | 0.17 | 0.14 | 0.09 | 0.14 | 0.09 | 0.14 |
| chr14 | 22667719  | 22668299  | Comtd1        | ENSMUSG00000021773 | -100 | 0.29 | 0.27 | 0.09 | 0.13 | 0.16 | 0.16 |
| chr14 | 27398919  | 27399489  | Fam116a       | ENSMUSG00000040818 | 140  | 0.14 | 0.12 | 0.16 | 0.09 | 0.08 | 0.12 |
| chr14 | 71290744  | 71291037  | Gfra2         | ENSMUSG00000022103 | 555  | 0.3  | 1    | 0.31 | 0.62 | 0.09 | 0.09 |
| chr14 | 103745329 | 103746229 | Mycbp2        | ENSMUSG00000033004 | -144 | 0.18 | 0.21 | 0.15 | 0.17 | 0.11 | 0.15 |
| chr14 | 122196624 | 122197844 | Dock9         | ENSMUSG00000025558 | -278 | 0.22 | 0.26 | 0.12 | 0.12 | 0.28 | 0.13 |
| chr14 | 20642569  | 20643178  | 2700060E02Rik | ENSMUSG00000021807 | 172  | 0.11 | 0.14 | 0.07 | 0.14 | 0.3  | 0.13 |
| chr14 | 22650424  | 22651158  | Vdac2         | ENSMUSG00000021771 | 300  | 0.12 | 0.07 | 0.09 | 0.13 | 0.08 | 0.14 |
| chr14 | 8650375   | 8651395   | Flnb          | ENSMUSG00000025278 | 414  | 0.27 | 0.21 | 0.11 | 0.17 | 0.13 | 0.17 |
| chr14 | 67853246  | 67853517  | Ebf2          | ENSMUSG00000022053 | -100 | 0.17 | 0.06 | 0.09 | 0.1  | 0.1  | 0.08 |
| chr14 | 79790034  | 79790738  | Naa16         | ENSMUSG00000022020 | 111  | 0.28 | 0.13 | 0.08 | 0.18 | 0.12 | 0.11 |

|       |           |           |           |                    |      |      |      |      |      |      |      |
|-------|-----------|-----------|-----------|--------------------|------|------|------|------|------|------|------|
| chr14 | 119536820 | 119538417 | Hs6st3    | ENSMUSG00000053465 | -19  | 0.11 | 0.16 | 0.1  | 0.14 | 0.08 | 0.12 |
| chr14 | 16271217  | 16271579  | Lrrc3b    | ENSMUSG00000045201 | 103  | 0.14 | 0.19 | 0.1  | 0.1  | 0.06 | 0.08 |
| chr14 | 20570390  | 20570813  | Nid2      | ENSMUSG00000021806 | 122  | 0.44 | NA   | 0.2  | 0.38 | 0.17 | 0.12 |
| chr14 | 70977273  | 70978017  | Nudt18    | ENSMUSG00000045211 | -9   | 0.15 | 0.1  | 0.09 | 0.1  | 0.1  | 0.14 |
| chr14 | 32063992  | 32064895  | Phf7      | ENSMUSG00000021902 | -249 | 0.16 | 0.15 | 0.07 | 0.1  | 0.06 | 0.12 |
| chr14 | 47917807  | 47918368  | Mapk1ip1l | ENSMUSG00000021840 | 121  | 0.24 | 0.28 | 0.1  | 0.12 | 0.19 | 0.12 |
| chr14 | 61656579  | 61656879  | Tnfrsf19  | ENSMUSG00000060548 | 95   | 0.34 | 0.64 | 0.12 | 0.14 | 0.22 | 0.17 |
| chr14 | 73542869  | 73543431  | Rcbtb2    | ENSMUSG00000022106 | 281  | 0.11 | 0.16 | 0.1  | 0.1  | 0.08 | 0.12 |
| chr14 | 62300266  | 62301973  | Dleu2     | ENSMUSG00000087313 | -66  | 0.17 | 0.16 | 0.09 | 0.13 | 0.12 | 0.13 |
| chr14 | 34259780  | 34260622  | Mapk8     | ENSMUSG00000021936 | 127  | 0.08 | 0.09 | 0.14 | 0.14 | 0.12 | 0.12 |
| chr14 | 22808265  | 22808947  | Zfp503    | ENSMUSG00000039081 | 217  | 0.14 | 0.19 | 0.1  | 0.16 | 0.07 | 0.16 |
| chr14 | 27353400  | 27354470  | Slmap     | ENSMUSG00000021870 | 446  | 0.12 | 0.22 | 0.13 | 0.15 | 0.15 | 0.12 |
| chr14 | 64224982  | 64225213  | Xkr6      | ENSMUSG00000035067 | -243 | 0.25 | 0.1  | 0.08 | 0.09 | 0.07 | 0.22 |
| chr14 | 30781615  | 30782021  | Selk      | ENSMUSG00000042682 | 196  | 0.25 | 0.35 | 0.12 | 0.11 | 0.18 | 0.14 |
| chr14 | 58508647  | 58509374  | Zdhhc20   | ENSMUSG00000021969 | 7    | 0.13 | 0.12 | 0.09 | 0.13 | 0.09 | 0.1  |
| chr14 | 71041763  | 71041982  | Fgf17     | ENSMUSG00000022101 | 203  | 0.3  | 0.27 | 0.16 | 0.15 | 0.2  | 0.36 |
| chr14 | 122933361 | 122933908 | Pcca      | ENSMUSG00000041650 | 88   | 0.56 | 0.27 | 0.13 | 0.17 | 0.4  | 0.17 |
| chr14 | 4213233   | 4214092   | Gm8108    | ENSMUSG00000091563 | 97   | 0.1  | 0.19 | 0.2  | 0.3  | 0.04 | 0.23 |
| chr14 | 118535919 | 118536781 | Gpr180    | ENSMUSG00000022131 | 1    | 0.11 | 0.18 | 0.08 | 0.11 | 0.07 | 0.1  |
| chr14 | 21000777  | 21001266  | Kcnk5     | ENSMUSG00000023243 | -17  | 0.5  | 0.17 | 0.23 | 0.25 | 0.23 | 0.29 |
| chr14 | 21493399  | 21493827  | Sec24c    | ENSMUSG00000039367 | 70   | 0.5  | 0.16 | 0.12 | 0.2  | 0.16 | 0.13 |
| chr14 | 56159110  | 56159406  | Pck2      | ENSMUSG00000040618 | 8    | 0.25 | 0.44 | 0.17 | 0.18 | 0.17 | 0.21 |
| chr14 | 56261997  | 56262695  | Tm9sf1    | ENSMUSG0000002320  | -258 | 0.1  | 0.13 | 0.11 | 0.12 | 0.07 | 0.13 |
| chr14 | 69955051  | 69955622  | Gm16677   | ENSMUSG00000086274 | -197 | 0.11 | 0.11 | 0.09 | 0.09 | 0.07 | 0.13 |
| chr14 | 105575887 | 105576738 | Rbm26     | ENSMUSG00000022119 | -235 | 0.17 | 0.14 | 0.17 | 0.13 | 0.11 | 0.14 |
| chr14 | 21212604  | 21213107  | Mrps16    | ENSMUSG00000049960 | -78  | 0.24 | 0.27 | 0.11 | 0.13 | 0.32 | 0.13 |
| chr14 | 13654333  | 13655738  | Cadps     | ENSMUSG00000054423 | 558  | 0.11 | 0.26 | 0.12 | 0.12 | 0.16 | 0.15 |
| chr14 | 55512893  | 55513463  | Pabpn1    | ENSMUSG00000022194 | 193  | 0.28 | 0.12 | 0.16 | 0.21 | 0.4  | 0.19 |
| chr14 | 60216530  | 60216858  | Cdadc1    | ENSMUSG00000021982 | -21  | 0.21 | 0.38 | 0.18 | 0.26 | 0.41 | 0.23 |
| chr14 | 64127359  | 64127675  | Tdh       | ENSMUSG00000021953 | 76   | 0.14 | 0.09 | 0.12 | 0.11 | 0.09 | 0.18 |

|       |           |           |               |                    |       |      |      |      |      |      |      |
|-------|-----------|-----------|---------------|--------------------|-------|------|------|------|------|------|------|
| chr14 | 14952964  | 14953566  | Psmc6         | ENSMUSG00000021737 | 182   | 0.12 | 0.13 | 0.06 | 0.11 | 0.09 | 0.11 |
| chr14 | 21514128  | 21515088  | Fut11         | ENSMUSG00000039357 | 418   | 0.17 | 0.19 | 0.08 | 0.1  | 0.11 | 0.13 |
| chr14 | 49791672  | 49791894  | Naa30         | ENSMUSG00000036282 | -118  | 0.17 | 0.06 | 0.12 | 0.2  | 0.08 | 0.12 |
| chr14 | 121309947 | 121311047 | Ipo5          | ENSMUSG00000030662 | 81    | 0.21 | 0.13 | 0.11 | 0.14 | 0.16 | 0.09 |
| chr14 | 122873230 | 122875521 | 2610035F20Rik | ENSMUSG00000085555 | 46    | 0.1  | 0.17 | 0.09 | 0.1  | 0.08 | 0.15 |
| chr14 | 21522059  | 21522455  | 6230400D17Rik | ENSMUSG00000086351 | -23   | 0.19 | 0.29 | 0.06 | 0.16 | 0.11 | 0.15 |
| chr14 | 22838817  | 22839080  | 1700112E06Rik | ENSMUSG00000063458 | 14    | 0.16 | 0.08 | 0.12 | 0.15 | 0.11 | 0.15 |
| chr14 | 40286323  | 40287421  | Nrg3          | ENSMUSG00000041014 | -496  | 0.22 | 0.12 | 0.09 | 0.2  | 0.17 | 0.14 |
| chr14 | 64225700  | 64225991  | Xkr6          | ENSMUSG00000035067 | -18   | 1    | 0.67 | 0.13 | 0.21 | 0.14 | 0.14 |
| chr14 | 70576410  | 70576950  | Pdlim2        | ENSMUSG00000022090 | -54   | 0.21 | 0.28 | 0.13 | 0.22 | 0.11 | 0.1  |
| chr14 | 76186409  | 76186928  | Slc25a30      | ENSMUSG00000022003 | 176   | 0.22 | 0.15 | 0.09 | 0.12 | 0.08 | 0.17 |
| chr14 | 33276071  | 33278149  | Gm2990        | ENSMUSG00000090669 | -1118 | 0.19 | 0.26 | 0.1  | 0.14 | 0.14 | 0.13 |
| chr14 | 47451454  | 47452318  | Gm10101       | ENSMUSG00000061510 | -184  | 0.27 | 0.21 | 0.12 | 0.19 | 0.14 | 0.23 |
| chr14 | 55045506  | 55045978  | Mrpl52        | ENSMUSG00000010406 | -4    | 0.26 | 0.1  | 0.15 | 0.25 | 0.19 | 0.19 |
| chr14 | 56503597  | 56504137  | Khyn1         | ENSMUSG00000047153 | 61    | 0.09 | 0.07 | 0.06 | 0.08 | 0.05 | 0.16 |
| chr14 | 63796544  | 63797013  | Fdft1         | ENSMUSG00000021273 | -148  | 0.18 | 0.19 | 0.1  | 0.15 | 0.26 | 0.12 |
| chr14 | 90297997  | 90298875  | Gm10110       | ENSMUSG00000062093 | -163  | 0.6  | 1    | 0.78 | 0.94 | 1    | 0.81 |
| chr14 | 25064247  | 25065170  | Dlg5          | ENSMUSG00000021782 | 434   | 0.09 | 0.15 | 0.08 | 0.11 | 0.12 | 0.1  |
| chr14 | 65716533  | 65717124  | Extl3         | ENSMUSG00000021978 | 115   | 0.11 | 0.17 | 0.12 | 0.17 | 0.16 | 0.16 |
| chr14 | 31814363  | 31815165  | Spcs1         | ENSMUSG00000021917 | -228  | 0.11 | 0.11 | 0.08 | 0.14 | 0.07 | 0.13 |
| chr14 | 46008164  | 46008633  | Gnpnat1       | ENSMUSG00000037722 | 79    | 0.25 | 0.13 | 0.16 | 0.1  | 0.09 | 0.15 |
| chr14 | 70919602  | 70920412  | Bmp1          | ENSMUSG00000022098 | -163  | 0.13 | 0.13 | 0.1  | 0.1  | 0.15 | 0.11 |
| chr14 | 25309880  | 25310445  | Rps24         | ENSMUSG00000025290 | 259   | 0.37 | 0.91 | 0.14 | 0.18 | 0.46 | 0.13 |
| chr14 | 32454262  | 32454531  | Hacl1         | ENSMUSG00000021884 | -38   | 1    | 0.13 | 0.12 | 0.26 | 0.15 | 0.2  |
| chr14 | 57722725  | 57723708  | Gjb2          | ENSMUSG00000046352 | 323   | 0.12 | 0.09 | 0.15 | 0.16 | 0.08 | 0.16 |
| chr14 | 73952479  | 73952991  | Sucla2        | ENSMUSG00000022110 | 162   | 0.2  | 0.27 | 0.07 | 0.13 | 0.15 | 0.11 |
| chr14 | 55082882  | 55083624  | Lrp10         | ENSMUSG00000022175 | 252   | 0.11 | 0.22 | 0.1  | 0.12 | 0.09 | 0.14 |
| chr14 | 67627080  | 67627998  | Bnip3l        | ENSMUSG00000022051 | 154   | 0.1  | 0.1  | 0.09 | 0.16 | 0.08 | 0.12 |
| chr14 | 20902048  | 20902678  | 1810063B07Rik | ENSMUSG00000045107 | 31    | 0.14 | 0.11 | 0.1  | 0.15 | 0.08 | 0.13 |
| chr14 | 67528914  | 67530166  | Pnma2         | ENSMUSG00000046204 | -467  | 0.12 | 0.22 | 0.13 | 0.14 | 0.18 | 0.13 |

|       |           |           |               |                    |       |      |      |      |      |      |      |
|-------|-----------|-----------|---------------|--------------------|-------|------|------|------|------|------|------|
| chr14 | 9046459   | 9047098   | Kctd6         | ENSMUSG00000021752 | 116   | 0.12 | 0.13 | 0.15 | 0.1  | 0.1  | 0.11 |
| chr14 | 52723330  | 52724084  | Hnrnpc        | ENSMUSG00000060373 | -28   | 1    | NA   | 0.09 | 0.14 | 0.21 | 0.09 |
| chr14 | 55710309  | 55710517  | Zfx2          | ENSMUSG00000040721 | 748   | 0.15 | 0.15 | 0.09 | 0.12 | 0.11 | 0.12 |
| chr14 | 76510306  | 76511016  | 1200011118Rik | ENSMUSG00000022008 | -39   | 0.28 | 0.42 | 0.12 | 0.19 | 0.23 | 0.15 |
| chr14 | 79124577  | 79125072  | Dgkh          | ENSMUSG00000034731 | 72    | 0.14 | 0.21 | 0.13 | 0.18 | 0.33 | 0.19 |
| chr14 | 79826154  | 79827036  | Kbtbd7        | ENSMUSG00000043881 | 395   | 0.09 | 0.08 | 0.08 | 0.16 | 0.12 | 0.17 |
| chr14 | 70828817  | 70829043  | Piwil2        | ENSMUSG00000033644 | -29   | 0.5  | 0.91 | 0.18 | 0.41 | 0.71 | 0.67 |
| chr14 | 76813846  | 76816358  | Tsc22d1       | ENSMUSG00000022010 | 334   | 0.13 | 0.19 | 0.09 | 0.14 | 0.12 | 0.14 |
| chr14 | 45937814  | 45938633  | Ero1l         | ENSMUSG00000021831 | 14    | 0.1  | 0.21 | 0.1  | 0.16 | 0.08 | 0.1  |
| chr14 | 35632251  | 35633816  | Grid1         | ENSMUSG00000041078 | 22    | 0.1  | 0.13 | 0.09 | 0.16 | 0.09 | 0.13 |
| chr14 | 51427242  | 51427636  | AC027184.1    | ENSMUSG00000092837 | 3     | 0.5  | NA   | 0.21 | 0.32 | 0.25 | 0.25 |
| chr14 | 66915681  | 66916421  | 1700001G11Rik | ENSMUSG00000085984 | -331  | 0.14 | 0.07 | 0.11 | 0.13 | 0.18 | 0.12 |
| chr14 | 121434285 | 121435602 | Farp1         | ENSMUSG00000025555 | 521   | 0.15 | 0.15 | 0.12 | 0.13 | 0.17 | 0.1  |
| chr14 | 61791512  | 61792368  | Sacs          | ENSMUSG00000048279 | 113   | 0.14 | 0.57 | 0.08 | 0.13 | 0.1  | 0.12 |
| chr14 | 57190335  | 57190856  | Cenpj         | ENSMUSG00000064128 | 88    | 0.12 | 0.13 | 0.09 | 0.12 | 0.09 | 0.17 |
| chr14 | 64162243  | 64162885  | Mtmt9         | ENSMUSG00000035078 | 226   | 0.17 | 0.19 | 0.08 | 0.16 | 0.21 | 0.13 |
| chr14 | 75683856  | 75684555  | Zc3h13        | ENSMUSG00000022000 | 25    | 0.12 | 0.38 | 0.1  | 0.23 | 0.14 | 0.18 |
| chr14 | 22569728  | 22570188  | Samd8         | ENSMUSG00000021770 | 205   | 0.06 | 0.15 | 0.1  | 0.13 | 0.11 | 0.09 |
| chr14 | 31941908  | 31942337  | 2010107H07Rik | ENSMUSG00000058351 | -6    | 0.14 | 0.17 | 0.15 | 0.21 | 0.09 | 0.17 |
| chr14 | 17081792  | 17082211  | Ngly1         | ENSMUSG00000021785 | 207   | 0.19 | 0.25 | 0.13 | 0.2  | 0.1  | 0.13 |
| chr14 | 56518984  | 56519298  | Sdr39u1       | ENSMUSG00000022223 | -72   | 0.2  | 1    | 0.06 | 0.13 | 0.13 | 0.17 |
| chr14 | 63379069  | 63380639  | 4931440J10Rik | ENSMUSG00000085212 | 516   | 0.11 | 0.1  | 0.08 | 0.16 | 0.13 | 0.18 |
| chr14 | 21612354  | 21613510  | Camk2g        | ENSMUSG00000021820 | 344   | 0.17 | 0.23 | 0.12 | 0.15 | 0.15 | 0.18 |
| chr14 | 26278548  | 26280578  | Zmiz1         | ENSMUSG0000007817  | 892   | 0.15 | 0.12 | 0.11 | 0.12 | 0.16 | 0.13 |
| chr14 | 56442208  | 56442576  | Nfatc4        | ENSMUSG00000023411 | -1240 | 0.19 | 0.4  | 0.1  | 0.17 | 0.24 | 0.12 |
| chr14 | 34736456  | 34737008  | Gdf10         | ENSMUSG00000021943 | -41   | 0.08 | 0.12 | 0.08 | 0.1  | 0.06 | 0.09 |
| chr14 | 66424640  | 66425075  | Pbk           | ENSMUSG00000022033 | 183   | 0.5  | 0.37 | 0.13 | 0.22 | 0.13 | 0.1  |
| chr14 | 68333173  | 68334592  | Cdca2         | ENSMUSG00000048922 | -450  | 0.19 | 0.3  | 0.1  | 0.15 | 0.17 | 0.12 |
| chr14 | 9005071   | 9005752   | Pdzb          | ENSMUSG00000021748 | 95    | 0.33 | 0.36 | 0.09 | 0.18 | 0.42 | 0.15 |
| chr14 | 79700525  | 79701650  | 1190002H23Rik | ENSMUSG00000022018 | 365   | 0.09 | 0.08 | 0.09 | 0.1  | 0.07 | 0.11 |

|       |           |           |               |                     |       |      |      |      |      |      |      |
|-------|-----------|-----------|---------------|---------------------|-------|------|------|------|------|------|------|
| chr14 | 60884002  | 60884449  | Mtmr6         | ENSMUSG00000021987  | 160   | 0.17 | 0.21 | 0.11 | 0.22 | 0.12 | 0.1  |
| chr14 | 123381921 | 123382817 | Tmtc4         | ENSMUSG00000041594  | -5    | 0.26 | 0.24 | 0.11 | 0.16 | 0.23 | 0.14 |
| chr14 | 57286852  | 57287523  | Mphosph8      | ENSMUSG00000079184  | 102   | 0.1  | 0.07 | 0.07 | 0.15 | 0.13 | 0.09 |
| chr14 | 57396429  | 57397276  | Pspc1         | ENSMUSG00000021938  | -88   | 0.19 | 0.15 | 0.11 | 0.28 | 0.15 | 0.17 |
| chr14 | 58693695  | 58695681  | Fgf9          | ENSMUSG00000021974  | 736   | 0.24 | 0.18 | 0.14 | 0.16 | 0.2  | 0.18 |
| chr14 | 68741651  | 68743128  | Nefm          | ENSMUSG00000022054  | 514   | 0.14 | 0.16 | 0.08 | 0.12 | 0.12 | 0.13 |
| chr14 | 55305066  | 55305836  | Acin1         | ENSMUSG00000022185  | 1     | 0.11 | 0.15 | 0.12 | 0.14 | 0.1  | 0.14 |
| chr14 | 102007048 | 102008483 | Tbc1d4        | ENSMUSG00000033083  | -88   | 0.18 | 0.33 | 0.14 | 0.16 | 0.16 | 0.2  |
| chr14 | 32248441  | 32249359  | Sh3bp5        | ENSMUSG00000021892  | 351   | 0.18 | 0.16 | 0.1  | 0.14 | 0.16 | 0.15 |
| chr14 | 56364460  | 56364903  | Dhrs1         | ENSMUSG0000002332   | -154  | 0.23 | 0.13 | 0.29 | 0.26 | 0.14 | 0.46 |
| chr14 | 63174348  | 63174807  | Fam124a       | ENSMUSG00000035184  | 3     | 0.13 | 0.13 | 0.09 | 0.15 | 0.11 | 0.11 |
| chr14 | 79880487  | 79882018  | Elf1          | ENSMUSG00000036461  | 251   | 0.16 | 0.15 | 0.09 | 0.12 | 0.15 | 0.14 |
| chr14 | 31638713  | 31639231  | Tmem110       | ENSMUSG00000006526  | 196   | 0.16 | 0.23 | 0.1  | 0.18 | 0.14 | 0.12 |
| chr14 | 56380815  | 56381716  | Ltb4r2        | ENSMUSG00000040432  | 504   | 0.08 | 0.14 | 0.1  | 0.09 | 0.11 | 0.16 |
| chr14 | 47005421  | 47005703  | Gm15222       | ENSMUSG000000086746 | -1632 | 0.21 | 0.14 | 0.11 | 0.13 | 0.13 | 0.16 |
| chr14 | 65271189  | 65271731  | Kif13b        | ENSMUSG000000060012 | 21    | 0.09 | 0.07 | 0.1  | 0.14 | 0.1  | 0.11 |
| chr14 | 76244636  | 76245789  | Gm4285        | ENSMUSG000000085829 | -441  | 0.28 | 0.23 | 0.12 | 0.15 | 0.29 | 0.16 |
| chr14 | 106295169 | 106296717 | Spry2         | ENSMUSG00000022114  | 93    | 0.15 | 0.23 | 0.14 | 0.18 | 0.12 | 0.16 |
| chr14 | 55250902  | 55251379  | CT009512.1    | ENSMUSG000000092443 | -26   | 0.93 | 0.93 | 0.88 | 0.89 | 0.92 | 0.93 |
| chr14 | 60869781  | 60870750  | Nupl1         | ENSMUSG000000063895 | 79    | 0.33 | 0.22 | 0.13 | 0.11 | 0.17 | 0.17 |
| chr14 | 62218265  | 62218553  | Trim13        | ENSMUSG000000035235 | 60    | 0.24 | 0.41 | 0.13 | 0.09 | 0.19 | 0.12 |
| chr14 | 73724976  | 73726383  | Rb1           | ENSMUSG00000022105  | -231  | 0.22 | 0.13 | 0.12 | 0.13 | 0.21 | 0.13 |
| chr14 | 61403352  | 61403802  | Mipep         | ENSMUSG00000021993  | 174   | 0.13 | 0.13 | 0.13 | 0.16 | 0.15 | 0.19 |
| chr14 | 64479081  | 64479474  | Pinx1         | ENSMUSG00000021958  | 128   | 0.08 | 0.1  | 0.12 | 0.18 | 0.07 | 0.16 |
| chr14 | 75132008  | 75132606  | Esd           | ENSMUSG00000021996  | 203   | 0.12 | 0.24 | 0.09 | 0.13 | 0.16 | 0.2  |
| chr14 | 76956287  | 76956749  | Serp2         | ENSMUSG000000052584 | -24   | 0.13 | 0.25 | 0.11 | 0.13 | 0.1  | 0.12 |
| chr14 | 102128646 | 102129334 | Gm9922        | ENSMUSG000000053821 | 41    | 0.18 | 0.25 | 0.12 | 0.14 | 0.12 | 0.17 |
| chr14 | 32307681  | 32308649  | Mettl6        | ENSMUSG00000021891  | 51    | 0.1  | 0.14 | 0.12 | 0.16 | 0.13 | 0.13 |
| chr14 | 9498576   | 9498851   | 4930452B06Rik | ENSMUSG00000021747  | 40    | 0.11 | 0.1  | 0.14 | 0.09 | 0.09 | 0.13 |
| chr14 | 66572350  | 66572801  | Scara3        | ENSMUSG000000034463 | 6     | 0.14 | 0.3  | 0.11 | 0.18 | 0.17 | 0.19 |



|       |           |           |               |                     |      |      |      |      |      |      |      |
|-------|-----------|-----------|---------------|---------------------|------|------|------|------|------|------|------|
| chr14 | 70842702  | 70843701  | Polr3d        | ENSMUSG00000000776  | 77   | 0.22 | 0.44 | 0.15 | 0.28 | 0.25 | 0.2  |
| chr14 | 12385879  | 12386974  | Ptprg         | ENSMUSG000000021745 | 380  | 0.15 | 0.13 | 0.1  | 0.12 | 0.14 | 0.12 |
| chr14 | 30821917  | 30822418  | Il17rb        | ENSMUSG000000015966 | -172 | 0.17 | 0.31 | 0.1  | 0.14 | 0.15 | 0.2  |
| chr14 | 8400384   | 8401138   | Gm3558        | ENSMUSG000000079364 | 319  | 1    | 0.5  | 0.17 | NA   | 0.25 | NA   |
| chr14 | 55544690  | 55545809  | Efs           | ENSMUSG000000022203 | 376  | 0.11 | 0.17 | 0.12 | 0.12 | 0.1  | 0.15 |
| chr14 | 13116627  | 13117174  | 3830406C13Rik | ENSMUSG000000033111 | 177  | 0.11 | 0.13 | 0.07 | 0.11 | 0.08 | 0.18 |
| chr14 | 65059376  | 65059854  | Msra          | ENSMUSG000000054733 | 207  | 0.3  | 0.28 | 0.16 | 0.19 | 0.27 | 0.15 |
| chr14 | 31764373  | 31764949  | Nek4          | ENSMUSG000000021918 | 14   | 0.33 | 0.1  | 0.09 | 0.14 | 0.13 | 0.15 |
| chr14 | 57676294  | 57677083  | Gja3          | ENSMUSG000000048582 | 179  | 0.09 | 0.12 | 0.21 | 0.12 | 0.08 | 0.18 |
| chr14 | 70477543  | 70480219  | Egr3          | ENSMUSG000000033730 | 1627 | 0.11 | 0.14 | 0.14 | 0.19 | 0.11 | 0.17 |
| chr14 | 55259954  | 55260574  | Cdh24         | ENSMUSG000000059674 | -63  | 0.15 | 0.1  | 0.11 | 0.11 | 0.14 | 0.14 |
| chr14 | 57751746  | 57752293  | Gjb6          | ENSMUSG000000040055 | 99   | 0.1  | 0.07 | 0.1  | 0.12 | 0.08 | 0.13 |
| chr14 | 21526698  | 21527303  | 2310021P13Rik | ENSMUSG000000021819 | 226  | 0.18 | 0.35 | 0.15 | 0.27 | 0.21 | 0.21 |
| chr14 | 32019499  | 32019912  | Nisch         | ENSMUSG000000021910 | 181  | 0.2  | 0.2  | 0.14 | 0.18 | 0.13 | 0.18 |
| chr14 | 68551083  | 68552033  | Dock5         | ENSMUSG000000044447 | 71   | 0.12 | 0.14 | 0.09 | 0.1  | 0.13 | 0.11 |
| chr14 | 69808639  | 69809071  | Nkx3-1        | ENSMUSG000000022061 | 160  | 0.17 | NA   | 0.11 | 0.05 | 0.12 | 0.21 |
| chr14 | 48187843  | 48188050  | Atg14         | ENSMUSG000000037526 | 163  | 0.08 | 0.07 | 0.09 | 0.1  | 0.05 | 0.09 |
| chr14 | 59819771  | 59820610  | Rc3hb1        | ENSMUSG000000035469 | 144  | 0.08 | 0.11 | 0.1  | 0.1  | 0.08 | 0.09 |
| chr14 | 62911423  | 62911860  | Rnaseh2b      | ENSMUSG000000021932 | 215  | 0.05 | 0.09 | 0.08 | 0.1  | 0.06 | 0.13 |
| chr14 | 29317896  | 29318170  | Wnt5a         | ENSMUSG000000021994 | 97   | 0.18 | 0.21 | 0.11 | 0.15 | 0.26 | 0.17 |
| chr14 | 56197172  | 56197468  | Psme1         | ENSMUSG000000022216 | 123  | 0.11 | 0.11 | 0.08 | 0.21 | 0.18 | 0.13 |
| chr14 | 121777580 | 121778754 | Stk24         | ENSMUSG000000063410 | 389  | 0.11 | 0.11 | 0.11 | 0.14 | 0.11 | 0.12 |
| chr14 | 19070738  | 19071926  | Nr1d2         | ENSMUSG000000021775 | 213  | 0.11 | 0.1  | 0.1  | 0.12 | 0.11 | 0.15 |
| chr14 | 47896106  | 47897008  | Wdhd1         | ENSMUSG000000037572 | -92  | 0.1  | 0.44 | 0.1  | 0.13 | 0.09 | 0.14 |
| chr14 | 103497969 | 103499070 | Fbxl3         | ENSMUSG000000022124 | -327 | 0.11 | 0.12 | 0.09 | 0.09 | 0.1  | 0.11 |
| chr14 | 32973026  | 32973442  | Ncoa4         | ENSMUSG000000056234 | 183  | 0.08 | 0.11 | 0.08 | 0.17 | 0.06 | 0.09 |
| chr14 | 115491349 | 115492144 | Gpc5          | ENSMUSG000000022112 | 309  | 0.09 | 0.15 | 0.1  | 0.13 | 0.1  | 0.17 |
| chr14 | 123312105 | 123312541 | 4930594M22Rik | ENSMUSG000000075463 | 71   | 0.11 | 0.14 | 0.09 | 0.09 | 0.11 | 0.1  |
| chr14 | 63456082  | 63456984  | Wdfy2         | ENSMUSG000000014547 | 6    | 0.11 | 0.46 | 0.14 | 0.14 | 0.12 | 0.24 |
| chr14 | 28149095  | 28149799  | Arhgef3       | ENSMUSG000000021895 | 176  | 0.17 | 0.27 | 0.09 | 0.32 | 0.15 | 0.22 |

|       |          |          |               |                    |      |      |      |      |      |      |      |
|-------|----------|----------|---------------|--------------------|------|------|------|------|------|------|------|
| chr14 | 70750834 | 70751386 | Slc39a14      | ENSMUSG00000022094 | 91   | 0.22 | 0.22 | 0.09 | 0.15 | 0.24 | 0.13 |
| chr14 | 47407506 | 47408114 | Cnih          | ENSMUSG00000015759 | 276  | 0.15 | 0.15 | 0.08 | 0.13 | 0.16 | 0.13 |
| chr14 | 51544312 | 51545006 | Osgep         | ENSMUSG00000006289 | -296 | 0.42 | 0.55 | 0.12 | 0.15 | 0.46 | 0.13 |
| chr14 | 8623940  | 8624331  | Gm10044       | ENSMUSG00000072723 | -68  | 0.1  | 0.07 | 0.09 | 0.09 | 0.11 | 0.16 |
| chr14 | 11994181 | 11994404 | Fhit          | ENSMUSG00000060579 | 254  | 0.11 | 0.08 | 0.13 | 0.12 | 0.11 | 0.28 |
| chr14 | 17407738 | 17408295 | Rarb          | ENSMUSG00000017491 | -30  | 1    | 0.69 | 0.31 | 0.49 | 0.79 | 0.28 |
| chr14 | 19159461 | 19159893 | Ube2e1        | ENSMUSG00000021774 | 128  | 0.13 | 0.08 | 0.13 | 0.21 | 0.12 | 0.13 |
| chr14 | 19725775 | 19726569 | Ube2e2        | ENSMUSG00000058317 | -379 | 0.08 | 0.07 | 0.31 | 0.4  | 0.08 | 0.35 |
| chr14 | 21207778 | 21208243 | Dnajc9        | ENSMUSG00000021811 | 122  | 0.12 | NA   | 0.12 | 0.11 | 0.08 | 0.12 |
| chr14 | 22666846 | 22667333 | Comtd1        | ENSMUSG00000021773 | -57  | 0.19 | 0.47 | 0.08 | 0.13 | 0.14 | 0.12 |
| chr14 | 25306079 | 25306390 | Polr3a        | ENSMUSG00000025280 | 34   | 0.06 | 0.05 | 0.1  | 0.13 | 0.05 | 0.09 |
| chr14 | 26197682 | 26198071 | Gm17716       | ENSMUSG00000091164 | 245  | 0.1  | 0.33 | 0.1  | 0.15 | 0.11 | 0.18 |
| chr14 | 28321454 | 28321840 | Ccdc66        | ENSMUSG00000046753 | -1   | 0.13 | 0.11 | 0.11 | 0.14 | 0.13 | 0.13 |
| chr14 | 31467517 | 31467782 | Rft1          | ENSMUSG00000052395 | 103  | 0.11 | NA   | 0.06 | 0.13 | 0.08 | 0.07 |
| chr14 | 33278365 | 33278588 | Gm2990        | ENSMUSG00000090669 | 248  | 0.14 | 0.08 | 0.13 | 0.23 | 0.12 | 0.12 |
| chr14 | 33326587 | 33327017 | Erc6          | ENSMUSG00000054051 | 95   | 0.33 | 0.25 | 0.11 | 0.13 | 0.15 | 0.12 |
| chr14 | 35014363 | 35014835 | Gprin2        | ENSMUSG00000071531 | 220  | 0.04 | 0.1  | 0.13 | 0.11 | 0.05 | 0.23 |
| chr14 | 35709449 | 35709720 | Mir346        | ENSMUSG00000065481 | 1789 | 0.14 | 0.32 | 0.14 | 0.21 | 0.15 | 0.24 |
| chr14 | 45608727 | 45609345 | Ptger2        | ENSMUSG00000037759 | 1166 | 0.12 | 0.07 | 0.14 | 0.23 | 0.09 | 0.18 |
| chr14 | 48037833 | 48038097 | Dlgap5        | ENSMUSG00000037544 | 117  | 0.25 | 0.18 | 0.16 | 0.19 | 0.28 | 0.19 |
| chr14 | 52504358 | 52504961 | Mettl17       | ENSMUSG00000004561 | 142  | 0.17 | 0.12 | 0.18 | 0.18 | 0.11 | 0.21 |
| chr14 | 52532746 | 52533182 | Ndr2          | ENSMUSG00000004558 | 199  | 0.14 | NA   | 0.08 | 0.17 | 0.09 | 0.25 |
| chr14 | 52924355 | 52924859 | Mettl3        | ENSMUSG00000022160 | 55   | 0.23 | 0.21 | 0.14 | 0.25 | 0.25 | 0.18 |
| chr14 | 54873375 | 54873872 | Dad1          | ENSMUSG00000022174 | -34  | 0.08 | 0.14 | 0.11 | 0.1  | 0.07 | 0.09 |
| chr14 | 54980480 | 54981112 | Oxa1l         | ENSMUSG0000000959  | 271  | 0.33 | 0.14 | 0.14 | 0.2  | 0.28 | 0.23 |
| chr14 | 55482664 | 55483306 | Homez         | ENSMUSG00000057156 | 10   | 0.11 | 0.15 | 0.12 | 0.15 | 0.12 | 0.23 |
| chr14 | 56472798 | 56473163 | Nynrin        | ENSMUSG00000075592 | 107  | 0.17 | 0.21 | 0.11 | 0.21 | 0.14 | 0.23 |
| chr14 | 58416785 | 58417616 | Sap18         | ENSMUSG00000021963 | 183  | 0.2  | 0.7  | 0.11 | 0.15 | 0.16 | 0.18 |
| chr14 | 58444730 | 58445553 | F630043A04Rik | ENSMUSG00000021965 | -141 | 0.14 | 0.21 | 0.09 | 0.12 | 0.09 | 0.09 |
| chr14 | 58689778 | 58690174 | Fgf9          | ENSMUSG00000021974 | 592  | 0.1  | 0.12 | 0.12 | 0.12 | 0.1  | 0.13 |

|       |           |           |               |                    |      |      |      |      |      |      |      |
|-------|-----------|-----------|---------------|--------------------|------|------|------|------|------|------|------|
| chr14 | 63864014  | 63864748  | Gata4         | ENSMUSG00000021944 | -296 | 0.14 | NA   | 0.11 | 0.14 | 0.13 | 0.11 |
| chr14 | 64055151  | 64055483  | Fam167a       | ENSMUSG00000035095 | 86   | 0.46 | 0.76 | 0.26 | 0.55 | 0.5  | 0.71 |
| chr14 | 65696252  | 65696614  | Extl3         | ENSMUSG00000021978 | 592  | 1    | NA   | 0.68 | 0.81 | 1    | 0.86 |
| chr14 | 65976883  | 65978039  | Zfp395        | ENSMUSG00000034522 | -52  | 0.1  | 0.11 | 0.09 | 0.11 | 0.1  | 0.13 |
| chr14 | 67690673  | 67691390  | Ppp2r2a       | ENSMUSG00000022052 | 235  | 0.23 | 0.69 | 0.24 | 0.15 | 0.22 | 0.18 |
| chr14 | 67852155  | 67852687  | Ebf2          | ENSMUSG00000022053 | -2   | 0.13 | 0.21 | 0.17 | 0.17 | 0.12 | 0.24 |
| chr14 | 70008876  | 70009151  | Loxl2         | ENSMUSG00000034205 | 35   | 0.18 | 0.18 | 0.06 | 0.11 | 0.17 | 0.17 |
| chr14 | 70131961  | 70132611  | Chmp7         | ENSMUSG00000034190 | 10   | 0.47 | 0.11 | 0.14 | 0.17 | 0.51 | 0.19 |
| chr14 | 70999145  | 70999451  | Fam160b2      | ENSMUSG00000022095 | 344  | 0.05 | 0.05 | 0.09 | 0.14 | 0.05 | 0.17 |
| chr14 | 73784597  | 73785103  | Itm2b         | ENSMUSG00000022108 | 228  | 0.09 | 0.1  | 0.13 | 0.14 | 0.09 | 0.18 |
| chr14 | 73909748  | 73910119  | Med4          | ENSMUSG00000022109 | 77   | 0.09 | 0.09 | 0.11 | 0.15 | 0.05 | 0.21 |
| chr14 | 75530777  | 75531016  | Lcp1          | ENSMUSG00000021998 | -12  | 0.09 | NA   | 0.19 | 0.2  | 0.08 | 0.27 |
| chr14 | 78274588  | 78274789  | Dnajc15       | ENSMUSG00000022013 | 36   | 0.09 | 0.22 | 0.18 | 0.23 | 0.14 | 0.16 |
| chr14 | 78936289  | 78936952  | Akap11        | ENSMUSG00000022016 | -5   | 0.15 | 0.12 | 0.09 | 0.09 | 0.08 | 0.07 |
| chr14 | 102053108 | 102053773 | Uchl3         | ENSMUSG00000022111 | 256  | 0.08 | 0.2  | 0.1  | 0.14 | 0.09 | 0.17 |
| chr14 | 119105003 | 119105769 | Abcc4         | ENSMUSG00000032849 | 55   | 0.16 | 0.25 | 0.1  | 0.16 | 0.17 | 0.12 |
| chr14 | 122889754 | 122890199 | Gm10837       | ENSMUSG00000075465 | 168  | 1    | 0.42 | 0.13 | 0.22 | 1    | 0.18 |
| chr14 | 3049153   | 3049889   | Gm2897        | ENSMUSG00000079410 | 236  | NA   | NA   | 0.14 | 1    | NA   | 0.13 |
| chr14 | 3438197   | 3438639   | Gm1973        | ENSMUSG00000079406 | 83   | NA   | NA   | 1    | NA   | NA   | NA   |
| chr14 | 3677596   | 3678038   | Gm3002        | ENSMUSG00000079399 | 83   | NA   | NA   | 1    | NA   | NA   | NA   |
| chr14 | 3915645   | 3916089   | Gm3002        | ENSMUSG00000079399 | 82   | NA   | 1    | NA   | NA   | NA   | NA   |
| chr14 | 4285341   | 4286139   | Gm2974        | ENSMUSG00000079391 | 125  | NA   | 0.29 | 0.27 | 0.43 | 0.17 | 0.24 |
| chr14 | 4437715   | 4438381   | 2610042L04Rik | ENSMUSG00000079388 | 246  | NA   | NA   | 0.24 | 0.34 | NA   | 0.15 |
| chr14 | 4829448   | 4830332   | Gm3252        | ENSMUSG00000092016 | 76   | 1    | 0.5  | 0.09 | 0.64 | NA   | NA   |
| chr14 | 4958462   | 4959290   | Gm3264        | ENSMUSG00000091209 | 261  | 0.33 | NA   | 0.21 | 0.42 | NA   | 0.2  |
| chr14 | 5174029   | 5174369   | Gm8281        | ENSMUSG00000090377 | 134  | NA   | NA   | 1    | NA   | NA   | NA   |
| chr14 | 5617998   | 5618563   | Gm3383        | ENSMUSG00000079376 | 249  | NA   | NA   | 1    | 1    | NA   | NA   |
| chr14 | 5944194   | 5944911   | Gm10021       | ENSMUSG00000079373 | 324  | NA   | NA   | 0.12 | NA   | 1    | NA   |
| chr14 | 6011710   | 6012436   | Gm8237        | ENSMUSG00000090707 | 332  | NA   | NA   | 0.38 | NA   | NA   | 0.33 |
| chr14 | 6093077   | 6093826   | Gm3248        | ENSMUSG00000091275 | 317  | NA   | NA   | 1    | 1    | NA   | 0.5  |

|       |          |          |               |                    |      |      |      |      |      |      |      |
|-------|----------|----------|---------------|--------------------|------|------|------|------|------|------|------|
| chr14 | 6169739  | 6170595  | Gm8206        | ENSMUSG00000091568 | 65   | NA   | 1    | 0.24 | 0.36 | NA   | 0.23 |
| chr14 | 6437092  | 6437657  | Gm3488        | ENSMUSG00000071616 | 247  | NA   | NA   | 0.6  | NA   | NA   | NA   |
| chr14 | 6676961  | 6677476  | Gm3500        | ENSMUSG00000091156 | -89  | NA   | NA   | 1    | 0.67 | NA   | NA   |
| chr14 | 6789711  | 6790276  | Gm3494        | ENSMUSG00000091208 | 247  | 0.5  | NA   | NA   | NA   | NA   | NA   |
| chr14 | 7721887  | 7722562  | Gm3667        | ENSMUSG00000090691 | 252  | NA   | 0.64 | 0.16 | 0.3  | 0.57 | 0.19 |
| chr14 | 8006416  | 8007243  | Gm3512        | ENSMUSG00000090363 | 218  | NA   | NA   | NA   | 0.43 | NA   | NA   |
| chr14 | 8076703  | 8077543  | Gm3715        | ENSMUSG00000072731 | 98   | NA   | 0.08 | 0.1  | 1    | 0.03 | 0.19 |
| chr14 | 8835192  | 8835522  | Abhd6         | ENSMUSG00000025277 | -59  | NA   | 1    | 1    | 0.56 | 1    | NA   |
| chr14 | 8912736  | 8913179  | Rpp14         | ENSMUSG00000023156 | 130  | NA   | 1    | 0.43 | 0.8  | 0.5  | 0.67 |
| chr14 | 8930487  | 8930698  | Pxk           | ENSMUSG00000033885 | -133 | 0.26 | 0.3  | 0.15 | 0.04 | NA   | 0.07 |
| chr14 | 14845769 | 14846042 | Atxn7         | ENSMUSG00000021738 | 900  | NA   | 0.33 | 0.1  | 1    | NA   | 0.14 |
| chr14 | 15178055 | 15179081 | Il3ra         | ENSMUSG00000068758 | -441 | 0.1  | 0.19 | 0.11 | 0.11 | NA   | 0.23 |
| chr14 | 20404059 | 20404511 | Gm2237        | ENSMUSG00000079354 | 72   | 0.17 | 0.2  | 0.11 | 0.11 | NA   | 0.11 |
| chr14 | 21298960 | 21299243 | Anxa7         | ENSMUSG00000021814 | 72   | NA   | NA   | NA   | 1    | NA   | 1    |
| chr14 | 26862039 | 26862322 | Gm9780        | ENSMUSG00000043248 | -46  | NA   | NA   | 1    | 1    | NA   | NA   |
| chr14 | 27783076 | 27784033 | Appl1         | ENSMUSG00000040760 | 95   | NA   | 0.67 | 0.1  | 0.2  | 0.15 | 0.18 |
| chr14 | 30791521 | 30791979 | Actr8         | ENSMUSG00000015971 | 227  | NA   | 0.5  | 0.22 | 0.11 | 0.14 | 0.17 |
| chr14 | 31951942 | 31952148 | Stab1         | ENSMUSG00000042286 | 989  | NA   | NA   | NA   | 1    | NA   | NA   |
| chr14 | 32978723 | 32978993 | Ncoa4         | ENSMUSG00000056234 | 83   | NA   | NA   | 0.08 | 0.15 | NA   | 0.11 |
| chr14 | 41826819 | 41827234 | 5730469M10Rik | ENSMUSG00000021792 | 34   | NA   | NA   | 0.09 | NA   | NA   | 0.15 |
| chr14 | 41886118 | 41886320 | Dydc1         | ENSMUSG00000021790 | 19   | NA   | NA   | 0.13 | 0.35 | 0.33 | 0.14 |
| chr14 | 43800703 | 43800935 | Gm7236        | ENSMUSG00000090389 | -185 | NA   | NA   | 0.52 | 0.46 | 0.56 | 0.35 |
| chr14 | 45478667 | 45478876 | Gm16976       | ENSMUSG00000085500 | 142  | NA   | NA   | NA   | NA   | NA   | 0.29 |
| chr14 | 45949317 | 45949775 | Psmc6         | ENSMUSG00000021832 | 42   | NA   | 0.4  | 0.15 | 0.15 | 0.2  | 0.14 |
| chr14 | 47380003 | 47380505 | Cdkn3         | ENSMUSG00000037628 | 38   | NA   | 1    | 0.24 | 0.5  | NA   | 0.16 |
| chr14 | 47441562 | 47442043 | Gmfb          | ENSMUSG00000062014 | 115  | NA   | 0.61 | 0.17 | 0.22 | 0.39 | 0.26 |
| chr14 | 49282011 | 49282282 | Otx2          | ENSMUSG00000021848 | 401  | NA   | 1    | 0.26 | NA   | 0.43 | 0.47 |
| chr14 | 49285655 | 49286399 | Otx2          | ENSMUSG00000021848 | -831 | NA   | NA   | 0.52 | 1    | 1    | 0.78 |
| chr14 | 52898834 | 52899681 | Rab2b         | ENSMUSG00000022159 | -341 | 1    | 1    | 0.1  | 0.14 | NA   | 0.19 |
| chr14 | 55136120 | 55136379 | Prmt5         | ENSMUSG00000023110 | -51  | NA   | 0.08 | 0.08 | 1    | 0.05 | 1    |

|       |           |           |               |                     |      |      |      |      |      |      |      |
|-------|-----------|-----------|---------------|---------------------|------|------|------|------|------|------|------|
| chr14 | 55399940  | 55400827  | Slc7a8        | ENSMUSG00000022180  | 340  | 0.17 | 0.1  | 0.19 | 0.19 | NA   | 0.27 |
| chr14 | 55633659  | 55634028  | Ngdn          | ENSMUSG00000022204  | -448 | 0.09 | 0.3  | 0.04 | 0.12 | NA   | 0.08 |
| chr14 | 55724844  | 55725158  | Ap1g2         | ENSMUSG00000040701  | -32  | NA   | 0.12 | 0.11 | 0.16 | 0.1  | 0.21 |
| chr14 | 56254340  | 56254686  | Ipo4          | ENSMUSG00000002319  | -107 | 0.12 | 0.11 | 0.14 | 0.14 | NA   | 0.17 |
| chr14 | 56279121  | 56279413  | Mdp1          | ENSMUSG00000002329  | 78   | NA   | 0.31 | 0.07 | 0.1  | NA   | 0.16 |
| chr14 | 56290695  | 56290940  | Nedd8         | ENSMUSG00000010376  | -107 | NA   | NA   | 0.12 | 0.14 | NA   | 0.1  |
| chr14 | 56444336  | 56444544  | Nfatc4        | ENSMUSG00000023411  | 808  | NA   | NA   | 1    | NA   | NA   | NA   |
| chr14 | 58017100  | 58017383  | Cryl1         | ENSMUSG00000021947  | 79   | NA   | 0.33 | 0.19 | NA   | NA   | 0.12 |
| chr14 | 60059512  | 60059886  | Setdb2        | ENSMUSG00000071350  | -123 | NA   | NA   | 0.1  | 0.36 | NA   | 0.27 |
| chr14 | 60795771  | 60796409  | Atp8a2        | ENSMUSG00000021983  | 286  | NA   | 0.31 | 0.1  | 0.12 | 0.47 | 0.14 |
| chr14 | 61664907  | 61665479  | Tnfrsf19      | ENSMUSG000000060548 | 499  | 1    | 0.25 | 0.11 | NA   | NA   | NA   |
| chr14 | 61979038  | 61979339  | Ebpl          | ENSMUSG00000021928  | 94   | NA   | NA   | 0.1  | 0.23 | NA   | 0.14 |
| chr14 | 63741250  | 63741705  | Ctsb          | ENSMUSG00000021939  | 175  | NA   | 0.25 | 0.19 | 1    | NA   | 0.22 |
| chr14 | 66452491  | 66452907  | Esco2         | ENSMUSG00000022034  | 132  | 0.25 | 0.11 | 0.11 | 0.26 | NA   | 0.11 |
| chr14 | 66663777  | 66664021  | Gm10233       | ENSMUSG000000068165 | -18  | NA   | NA   | 0.85 | 1    | NA   | NA   |
| chr14 | 67486269  | 67486597  | Dpysl2        | ENSMUSG00000022048  | 1092 | NA   | NA   | 0.1  | 0.2  | 1    | 0.32 |
| chr14 | 67850663  | 67850923  | RP23-177N16.1 | ENSMUSG00000093744  | 1173 | NA   | 1    | 0.32 | 0.6  | NA   | 0.23 |
| chr14 | 70107104  | 70107437  | R3hcc1        | ENSMUSG00000034194  | 30   | NA   | NA   | 0.12 | NA   | NA   | 0.35 |
| chr14 | 71290309  | 71290540  | Gfra2         | ENSMUSG00000022103  | 89   | NA   | NA   | 0.12 | 0.16 | NA   | 0.28 |
| chr14 | 73924682  | 73925122  | Sucla2        | ENSMUSG00000022110  | -224 | NA   | 0.63 | 0.15 | 0.12 | 0.22 | 0.19 |
| chr14 | 75415762  | 75416298  | 5031414D18Rik | ENSMUSG00000034959  | 196  | NA   | NA   | NA   | NA   | 1    | NA   |
| chr14 | 79851640  | 79852362  | Gm5465        | ENSMUSG000000075502 | 359  | NA   | 1    | 1    | 0.43 | NA   | NA   |
| chr14 | 84843126  | 84843449  | Pcdh17        | ENSMUSG00000035566  | -83  | NA   | NA   | 0.38 | NA   | NA   | 0.75 |
| chr14 | 84844095  | 84844308  | Pcdh17        | ENSMUSG00000035566  | 831  | 0.2  | 0.11 | 0.16 | 0.13 | NA   | 0.09 |
| chr14 | 102039419 | 102039725 | Commd6        | ENSMUSG00000075486  | 116  | NA   | 0.53 | 0.08 | 0.25 | 0.11 | 0.23 |
| chr14 | 106294293 | 106294540 | Spry2         | ENSMUSG00000022114  | 1620 | NA   | NA   | 0.3  | 1    | NA   | 0.39 |
| chr14 | 106505316 | 106505948 | Trim52        | ENSMUSG00000022113  | 217  | NA   | NA   | 0.88 | 1    | NA   | 1    |
| chr14 | 119253810 | 119254259 | Cldn10        | ENSMUSG00000022132  | 80   | NA   | 0.11 | 0.1  | 0.11 | NA   | 0.14 |
| chr15 | 98126369  | 98126751  | Zfp641        | ENSMUSG00000022987  | -46  | 0.06 | 0.12 | 0.07 | 0.11 | 0.25 | 0.12 |
| chr15 | 94233659  | 94234801  | Adamts20      | ENSMUSG00000022449  | 459  | 0.27 | 0.16 | 0.09 | 0.17 | 0.06 | 0.11 |

|       |           |           |               |                    |      |      |      |      |      |      |      |
|-------|-----------|-----------|---------------|--------------------|------|------|------|------|------|------|------|
| chr15 | 99200363  | 99201023  | Fmnl3         | ENSMUSG00000023008 | 89   | 0.26 | 0.11 | 0.1  | 0.15 | 0.08 | 0.13 |
| chr15 | 81415555  | 81417204  | Ep300         | ENSMUSG00000055024 | 598  | 0.3  | 0.2  | 0.09 | 0.13 | 0.13 | 0.13 |
| chr15 | 75692556  | 75692870  | Gsdmd         | ENSMUSG00000022575 | -56  | 0.55 | 0.46 | 0.16 | 0.21 | 0.06 | 0.19 |
| chr15 | 77759271  | 77759568  | Txn2          | ENSMUSG0000005354  | -21  | 0.75 | 0.15 | 0.14 | 0.33 | 0.12 | 0.14 |
| chr15 | 58765130  | 58765541  | Tatdn1        | ENSMUSG00000050891 | -53  | 0.54 | 0.12 | 0.13 | 0.17 | 0.18 | 0.13 |
| chr15 | 39028621  | 39030713  | Rims2         | ENSMUSG00000037386 | -211 | 0.26 | 0.24 | 0.11 | 0.16 | 0.14 | 0.15 |
| chr15 | 102180858 | 102181321 | Aaas          | ENSMUSG00000036678 | 101  | 0.55 | 0.25 | 0.15 | 0.23 | 0.14 | 0.17 |
| chr15 | 103368113 | 103368606 | Ppp1r1a       | ENSMUSG00000022490 | 64   | 0.31 | 0.1  | 0.08 | 0.19 | 0.1  | 0.15 |
| chr15 | 96471453  | 96473475  | Slc38a1       | ENSMUSG00000023169 | -71  | 0.29 | 0.14 | 0.12 | 0.11 | 0.07 | 0.18 |
| chr15 | 73014521  | 73015901  | Eif2c2        | ENSMUSG00000036698 | 59   | 0.22 | 0.15 | 0.1  | 0.15 | 0.07 | 0.15 |
| chr15 | 65618525  | 65619296  | Efr3a         | ENSMUSG00000015002 | 314  | 0.24 | 0.11 | 0.1  | 0.13 | 0.09 | 0.12 |
| chr15 | 87374444  | 87375663  | Fam19a5       | ENSMUSG00000054863 | 149  | 0.21 | 0.12 | 0.11 | 0.15 | 0.1  | 0.12 |
| chr15 | 76701235  | 76701975  | Zfp251        | ENSMUSG00000022526 | 260  | 1    | 0.1  | 0.13 | 0.12 | 0.1  | 0.09 |
| chr15 | 81900434  | 81900739  | Mei1          | ENSMUSG00000068117 | 160  | 0.5  | 0.25 | 0.18 | 0.23 | 0.26 | 0.21 |
| chr15 | 54577600  | 54577856  | Nov           | ENSMUSG00000037362 | 471  | 0.4  | 0.28 | 0.15 | 0.2  | 0.17 | 0.17 |
| chr15 | 27396002  | 27397081  | Ank           | ENSMUSG00000022265 | 109  | 0.7  | 0.26 | 0.12 | 0.14 | 0.3  | 0.14 |
| chr15 | 82742057  | 82742411  | Tcf20         | ENSMUSG00000041852 | 330  | 0.41 | 0.22 | 0.15 | 0.14 | 0.16 | 0.13 |
| chr15 | 76487204  | 76487678  | Cyhr1         | ENSMUSG00000053929 | -91  | 0.53 | 0.13 | 0.12 | 0.18 | 0.12 | 0.13 |
| chr15 | 34011990  | 34013091  | Mtdh          | ENSMUSG00000022255 | 91   | 0.24 | 0.24 | 0.11 | 0.13 | 0.1  | 0.16 |
| chr15 | 81977315  | 81978388  | Srebf2        | ENSMUSG00000022463 | 155  | 0.28 | 0.21 | 0.12 | 0.17 | 0.1  | 0.15 |
| chr15 | 7079140   | 7079988   | Lifr          | ENSMUSG00000054263 | 5    | 0.31 | 0.21 | 0.08 | 0.16 | 0.11 | 0.08 |
| chr15 | 101242641 | 101243248 | Krt7          | ENSMUSG00000023039 | 111  | 0.44 | 0.8  | 0.38 | 0.37 | 0.68 | 0.53 |
| chr15 | 88979701  | 88980009  | Mapk11        | ENSMUSG00000053137 | 117  | 0.3  | 0.13 | 0.12 | 0.21 | 0.1  | 0.1  |
| chr15 | 102865191 | 102865456 | Hoxc4         | ENSMUSG00000075394 | 497  | 0.3  | 0.07 | 0.23 | 0.28 | 0.07 | 0.14 |
| chr15 | 27953964  | 27956032  | Trio          | ENSMUSG00000022263 | 605  | 0.15 | 0.15 | 0.1  | 0.16 | 0.09 | 0.11 |
| chr15 | 101858553 | 101858861 | Krt18         | ENSMUSG00000023043 | 60   | 0.48 | 0.66 | 0.15 | 0.14 | 0.25 | 0.16 |
| chr15 | 89026445  | 89027072  | Fam116b       | ENSMUSG00000015377 | 147  | 0.28 | 0.13 | 0.11 | 0.13 | 0.1  | 0.16 |
| chr15 | 11835822  | 11836193  | Npr3          | ENSMUSG00000022206 | -578 | 0.29 | 0.16 | 0.16 | 0.19 | 0.08 | 0.12 |
| chr15 | 41278707  | 41279275  | Oxr1          | ENSMUSG00000022307 | -37  | 0.27 | 0.17 | 0.11 | 0.18 | 0.11 | 0.12 |
| chr15 | 74539453  | 74540024  | 4933427E11Rik | ENSMUSG00000044276 | 147  | 0.2  | 0.16 | 0.11 | 0.15 | 0.07 | 0.14 |

|       |           |           |               |                      |       |      |      |      |      |      |      |
|-------|-----------|-----------|---------------|----------------------|-------|------|------|------|------|------|------|
| chr15 | 76709648  | 76709925  | Zfp7          | ENSMUSG000000033669  | 97    | 0.88 | 0.29 | 0.13 | 0.15 | 0.16 | 0.18 |
| chr15 | 79271922  | 79272567  | Csnk1e        | ENSMUSG000000022433  | 4     | 0.14 | 0.34 | 0.16 | 0.16 | 0.25 | 0.15 |
| chr15 | 88919400  | 88920183  | 1300018J18Rik | ENSMUSG000000035757  | 277   | 0.21 | 0.16 | 0.1  | 0.19 | 0.11 | 0.11 |
| chr15 | 58704101  | 58704649  | Trmt12        | ENSMUSG000000037085  | 171   | 0.26 | 0.24 | 0.14 | 0.13 | 0.12 | 0.17 |
| chr15 | 59205514  | 59205956  | E430025E21Rik | ENSMUSG000000022350  | -13   | 0.43 | 0.11 | 0.11 | 0.16 | 0.16 | 0.11 |
| chr15 | 61816503  | 61819771  | Myc           | ENSMUSG000000022346  | 1191  | 0.17 | 0.14 | 0.12 | 0.13 | 0.08 | 0.16 |
| chr15 | 81790711  | 81791542  | Pmm1          | ENSMUSG000000022474  | 68    | 0.33 | 0.16 | 0.12 | 0.14 | 0.06 | 0.11 |
| chr15 | 99500689  | 99501535  | Accn2         | ENSMUSG000000023017  | -37   | 0.19 | 0.13 | 0.09 | 0.13 | 0.08 | 0.14 |
| chr15 | 44450654  | 44451423  | Ebag9         | ENSMUSG000000022339  | -149  | 0.17 | 0.09 | 0.09 | 0.13 | 0.07 | 0.12 |
| chr15 | 82952787  | 82953292  | Rrp7a         | ENSMUSG000000018040  | 142   | 0.16 | 0.1  | 0.09 | 0.14 | 0.04 | 0.08 |
| chr15 | 80003668  | 80004712  | Mgat3         | ENSMUSG000000042428  | 39    | 0.2  | 0.2  | 0.11 | 0.13 | 0.11 | 0.13 |
| chr15 | 94373695  | 94374440  | Pus7l         | ENSMUSG000000033356  | -150  | 0.13 | 1    | 0.08 | 0.2  | 0.42 | 0.13 |
| chr15 | 75910818  | 75911540  | Puf60         | ENSMUSG000000002524  | 197   | 0.2  | 0.27 | 0.09 | 0.11 | 0.06 | 0.17 |
| chr15 | 102077405 | 102078442 | Rarg          | ENSMUSG000000001288  | -992  | 0.29 | 0.2  | 0.13 | 0.19 | 0.15 | 0.16 |
| chr15 | 54943784  | 54944461  | Deptor        | ENSMUSG000000022419  | 250   | 0.24 | 0.1  | 0.09 | 0.17 | 0.08 | 0.17 |
| chr15 | 81689497  | 81689701  | Tob2          | ENSMUSG000000078960  | -373  | 1    | 0.39 | 0.17 | 0.18 | 0.31 | 0.13 |
| chr15 | 100445941 | 100446698 | Dazap2        | ENSMUSG000000000346  | 250   | 0.19 | 0.48 | 0.26 | 0.16 | 0.45 | 0.21 |
| chr15 | 41620361  | 41620962  | Gm16718       | ENSMUSG0000000086242 | -204  | 0.26 | 0.17 | 0.16 | 0.18 | 0.1  | 0.16 |
| chr15 | 35300941  | 35301600  | Vps13b        | ENSMUSG0000000037646 | -31   | 0.15 | 0.12 | 0.1  | 0.19 | 0.07 | 0.11 |
| chr15 | 98364083  | 98364920  | 2310037I24Rik | ENSMUSG0000000022992 | 151   | 0.13 | 0.2  | 0.12 | 0.12 | 0.05 | 0.13 |
| chr15 | 98635798  | 98636544  | B130046B21Rik | ENSMUSG0000000085373 | -1292 | 0.07 | 0.14 | 0.12 | 0.17 | 0.24 | 0.16 |
| chr15 | 75827952  | 75829430  | Mapk15        | ENSMUSG0000000063704 | 1548  | 0.17 | 0.12 | 0.09 | 0.15 | 0.08 | 0.13 |
| chr15 | 98956575  | 98957675  | Spats2        | ENSMUSG000000051934  | 116   | 0.13 | 0.33 | 0.19 | 0.31 | 0.23 | 0.24 |
| chr15 | 6336350   | 6336893   | Dab2          | ENSMUSG000000022150  | 23    | 0.2  | 0.23 | 0.15 | 0.42 | 0.08 | 0.3  |
| chr15 | 27560216  | 27560625  | Fam105b       | ENSMUSG000000046034  | 28    | 0.51 | 0.9  | 0.13 | 0.21 | 0.29 | 0.16 |
| chr15 | 64752297  | 64754247  | Adcy8         | ENSMUSG000000022376  | 586   | 0.38 | 0.05 | 0.16 | 0.16 | 0.08 | 0.14 |
| chr15 | 76059576  | 76060373  | Plec          | ENSMUSG000000022565  | -47   | 0.47 | 0.49 | 0.08 | 0.22 | 0.21 | 0.16 |
| chr15 | 94459330  | 94459958  | Tmem117       | ENSMUSG0000000063296 | 28    | 0.2  | 0.12 | 0.1  | 0.13 | 0.12 | 0.15 |
| chr15 | 76157645  | 76158158  | Exosc4        | ENSMUSG0000000034259 | 74    | 0.24 | 0.19 | 0.15 | 0.13 | 0.1  | 0.12 |
| chr15 | 79517760  | 79518650  | Josd1         | ENSMUSG000000022426  | 97    | 0.18 | 0.13 | 0.16 | 0.14 | 0.1  | 0.12 |

|       |           |           |               |                    |       |      |      |      |      |      |      |
|-------|-----------|-----------|---------------|--------------------|-------|------|------|------|------|------|------|
| chr15 | 10643803  | 10644792  | Rai14         | ENSMUSG00000022246 | 89    | 0.16 | 0.26 | 0.13 | 0.19 | 0.26 | 0.17 |
| chr15 | 57972849  | 57973198  | Wdyhv1        | ENSMUSG00000022359 | 60    | 0.28 | 0.51 | 0.12 | 0.17 | 0.12 | 0.16 |
| chr15 | 76778841  | 76779427  | 1110038F14Rik | ENSMUSG00000063236 | 165   | 0.27 | 0.06 | 0.11 | 0.19 | 0.06 | 0.33 |
| chr15 | 93105245  | 93106206  | Gxylt1        | ENSMUSG00000036197 | -143  | 0.24 | 0.31 | 0.12 | 0.12 | 0.15 | 0.16 |
| chr15 | 54921694  | 54922113  | Dscc1         | ENSMUSG00000022422 | 132   | 0.2  | 0.29 | 0.14 | 0.16 | 0.11 | 0.18 |
| chr15 | 89284080  | 89284757  | Mapk8ip2      | ENSMUSG00000022619 | 74    | 0.08 | 0.35 | 0.33 | 0.16 | 0.39 | 0.14 |
| chr15 | 44258989  | 44259878  | Nudcd1        | ENSMUSG00000038736 | -28   | 0.75 | 0.36 | 0.11 | 0.23 | 0.15 | 0.14 |
| chr15 | 51871576  | 51872127  | Aard          | ENSMUSG00000068522 | 198   | 0.14 | 0.1  | 0.08 | 0.12 | 0.05 | 0.1  |
| chr15 | 102300743 | 102301675 | Pcbp2         | ENSMUSG00000056851 | 146   | 0.22 | 0.11 | 0.11 | 0.22 | 0.12 | 0.17 |
| chr15 | 85406728  | 85408574  | Wnt1b         | ENSMUSG00000022382 | 849   | 0.19 | 0.22 | 0.12 | 0.18 | 0.07 | 0.19 |
| chr15 | 12047236  | 12048585  | Zfr           | ENSMUSG00000022201 | 324   | 0.15 | 0.14 | 0.1  | 0.17 | 0.09 | 0.11 |
| chr15 | 98783451  | 98784000  | Tuba1a        | ENSMUSG00000072235 | 248   | 0.46 | 0.3  | 0.1  | 0.25 | 0.35 | 0.11 |
| chr15 | 79664447  | 79664931  | Cbx6          | ENSMUSG00000089715 | -48   | 0.2  | 0.2  | 0.12 | 0.12 | 0.11 | 0.16 |
| chr15 | 97738408  | 97739146  | Vdr           | ENSMUSG00000022479 | -36   | 0.13 | 0.12 | 0.07 | 0.1  | 0.06 | 0.1  |
| chr15 | 98926976  | 98928842  | Dnajc22       | ENSMUSG00000038009 | -1934 | 0.32 | 0.23 | 0.14 | 0.22 | 0.19 | 0.2  |
| chr15 | 102347010 | 102347565 | Map3k12       | ENSMUSG00000023050 | -44   | 0.23 | 0.3  | 0.11 | 0.14 | 0.11 | 0.17 |
| chr15 | 8660129   | 8660432   | Slc1a3        | ENSMUSG00000005360 | 129   | 0.44 | NA   | 0.12 | 0.23 | 0.1  | 0.12 |
| chr15 | 76342000  | 76342501  | Dgat1         | ENSMUSG00000022555 | 131   | 0.19 | 0.1  | 0.07 | 0.17 | 0.08 | 0.1  |
| chr15 | 102235742 | 102237331 | Sp1           | ENSMUSG0000001280  | -38   | 0.52 | 0.27 | 0.11 | 0.16 | 0.25 | 0.15 |
| chr15 | 82171421  | 82171843  | Fam109b       | ENSMUSG00000049687 | 23    | 0.1  | 0.15 | 0.23 | 0.23 | 0.19 | 0.24 |
| chr15 | 37162742  | 37164196  | Grhl2         | ENSMUSG00000022286 | 678   | 0.22 | 0.27 | 0.25 | 0.26 | 0.14 | 0.21 |
| chr15 | 76173896  | 76174412  | Cyc1          | ENSMUSG00000022551 | 201   | 0.1  | 0.39 | 0.11 | 0.21 | 0.31 | 0.1  |
| chr15 | 34608125  | 34608612  | Nipal2        | ENSMUSG00000038879 | 93    | 0.17 | 0.15 | 0.1  | 0.18 | 0.33 | 0.13 |
| chr15 | 89209044  | 89209589  | Odf3b         | ENSMUSG00000047394 | 369   | 0.19 | 0.17 | 0.12 | 0.16 | 0.11 | 0.11 |
| chr15 | 61869472  | 61869739  | Pvt1          | ENSMUSG00000072566 | 63    | 1    | 0.12 | 0.15 | 1    | 0.14 | 0.2  |
| chr15 | 78744150  | 78745050  | Pdpx          | ENSMUSG00000068221 | 251   | 0.07 | 0.17 | 0.1  | 0.14 | 0.18 | 0.12 |
| chr15 | 78813139  | 78813750  | Triobp        | ENSMUSG00000033088 | -27   | 0.26 | 0.29 | 0.17 | 0.18 | 0.19 | 0.18 |
| chr15 | 99287529  | 99288576  | Nckap5l       | ENSMUSG00000023009 | 91    | 0.19 | 0.21 | 0.1  | 0.18 | 0.1  | 0.15 |
| chr15 | 79177739  | 79178663  | Maff          | ENSMUSG00000042622 | 230   | 0.13 | 0.07 | 0.07 | 0.14 | 0.07 | 0.14 |
| chr15 | 97834824  | 97835324  | Col2a1        | ENSMUSG00000022483 | -8    | 0.1  | 0.1  | 0.12 | 0.18 | 0.19 | 0.13 |



|       |           |           |               |                     |      |      |      |      |      |      |      |
|-------|-----------|-----------|---------------|---------------------|------|------|------|------|------|------|------|
| chr15 | 99082106  | 99082653  | Mcrs1         | ENSMUSG00000037570  | 13   | 0.14 | 1    | 0.1  | 0.23 | 0.31 | 0.15 |
| chr15 | 87454500  | 87456136  | Fam19a5       | ENSMUSG00000054863  | -342 | 0.14 | 0.13 | 0.12 | 0.16 | 0.11 | 0.11 |
| chr15 | 7760071   | 7761208   | Gdnf          | ENSMUSG00000022144  | -372 | 0.06 | 0.29 | 0.09 | 0.13 | 0.12 | 0.13 |
| chr15 | 31296783  | 31297761  | Ankrd33b      | ENSMUSG00000022237  | 15   | 0.12 | 0.12 | 0.11 | 0.16 | 0.06 | 0.15 |
| chr15 | 85410841  | 85412492  | Wnt7b         | ENSMUSG00000022382  | -507 | 0.15 | 0.11 | 0.08 | 0.14 | 0.11 | 0.12 |
| chr15 | 100298934 | 100299851 | 5330439K02Rik | ENSMUSG00000092050  | -270 | 0.1  | 0.18 | 0.12 | 0.09 | 0.2  | 0.12 |
| chr15 | 13102863  | 13103169  | Cdh6          | ENSMUSG00000039385  | 378  | 0.31 | 0.07 | 0.08 | 0.21 | 0.13 | 0.1  |
| chr15 | 73342780  | 73343266  | Dennd3        | ENSMUSG00000036661  | 33   | 0.36 | 0.67 | 0.19 | 0.36 | 0.9  | 0.23 |
| chr15 | 85862895  | 85864629  | Celsr1        | ENSMUSG00000016028  | 445  | 0.16 | 0.22 | 0.1  | 0.2  | 0.12 | 0.18 |
| chr15 | 37890411  | 37891153  | Rrm2b         | ENSMUSG00000022292  | -178 | 0.18 | 0.15 | 0.11 | 0.14 | 0.38 | 0.2  |
| chr15 | 85565254  | 85566509  | Ppara         | ENSMUSG00000022383  | 468  | 0.27 | 0.14 | 0.14 | 0.12 | 0.16 | 0.2  |
| chr15 | 54903471  | 54903792  | Taf2          | ENSMUSG00000037343  | 76   | 0.16 | 0.12 | 0.09 | 0.09 | 0.08 | 0.14 |
| chr15 | 58912832  | 58914092  | Mtss1         | ENSMUSG00000022353  | 119  | 0.15 | 0.14 | 0.09 | 0.15 | 0.1  | 0.15 |
| chr15 | 99125238  | 99125833  | Prpf40b       | ENSMUSG00000023007  | 17   | 0.14 | 0.1  | 0.08 | 0.15 | 0.06 | 0.1  |
| chr15 | 79346707  | 79347188  | Kdelr3        | ENSMUSG00000010830  | 109  | 1    | 0.29 | 0.1  | 0.15 | 0.41 | 0.25 |
| chr15 | 8059224   | 8059568   | Nup155        | ENSMUSG00000022142  | 83   | 1    | 0.43 | 0.66 | 0.5  | 0.56 | 0.33 |
| chr15 | 76180860  | 76182157  | Sharpin       | ENSMUSG00000022552  | -396 | 0.2  | 0.22 | 0.17 | 0.18 | 0.29 | 0.16 |
| chr15 | 83197293  | 83197963  | 1700001L05Rik | ENSMUSG00000075511  | 79   | 0.4  | 0.09 | 0.16 | 0.42 | 0.19 | 0.19 |
| chr15 | 36722140  | 36724134  | Ywhaz         | ENSMUSG00000022285  | -968 | 0.14 | 0.23 | 0.13 | 0.17 | 0.2  | 0.2  |
| chr15 | 76210649  | 76210953  | Heatr7a       | ENSMUSG00000022558  | 110  | 0.25 | 0.13 | 0.13 | 0.12 | 0.09 | 0.07 |
| chr15 | 94419768  | 94420375  | Twf1          | ENSMUSG00000022451  | 239  | 0.12 | 0.18 | 0.13 | 0.14 | 0.23 | 0.18 |
| chr15 | 86015719  | 86016251  | Gm15569       | ENSMUSG000000086424 | -173 | 0.12 | 0.17 | 0.12 | 0.14 | 0.05 | 0.16 |
| chr15 | 83385671  | 83386184  | Mcat          | ENSMUSG00000048755  | 214  | 0.24 | 0.17 | 0.11 | 0.1  | 0.15 | 0.14 |
| chr15 | 84753391  | 84754498  | Nup50         | ENSMUSG00000016619  | 113  | 0.17 | 0.08 | 0.1  | 0.15 | 0.11 | 0.14 |
| chr15 | 86044314  | 86045148  | Tbc1d22a      | ENSMUSG00000051864  | -146 | 0.4  | 0.33 | 0.12 | 0.14 | 0.27 | 0.12 |
| chr15 | 57865413  | 57865926  | 9130401M01Rik | ENSMUSG00000022362  | 180  | 0.23 | 0.17 | 0.08 | 0.16 | 0.14 | 0.15 |
| chr15 | 57723582  | 57724160  | Derl1         | ENSMUSG00000022365  | 102  | 0.12 | 0.08 | 0.12 | 0.12 | 0.07 | 0.17 |
| chr15 | 3945516   | 3946031   | AW549877      | ENSMUSG00000041935  | -21  | 1    | 0.44 | 0.15 | 0.14 | 0.21 | 0.13 |
| chr15 | 75396894  | 75397492  | Ly6h          | ENSMUSG00000022577  | -131 | 0.18 | 0.21 | 0.12 | 0.13 | 0.08 | 0.12 |
| chr15 | 97614714  | 97615393  | Slc48a1       | ENSMUSG00000081534  | 267  | 0.08 | 0.2  | 0.1  | 0.13 | 0.12 | 0.12 |

|       |           |           |               |                    |      |      |      |      |      |      |      |
|-------|-----------|-----------|---------------|--------------------|------|------|------|------|------|------|------|
| chr15 | 11833606  | 11835432  | Npr3          | ENSMUSG00000022206 | 910  | 0.12 | 0.11 | 0.1  | 0.15 | 0.08 | 0.14 |
| chr15 | 89010757  | 89011673  | Pixnb2        | ENSMUSG00000036606 | -77  | 0.18 | 0.26 | 0.15 | 0.19 | 0.25 | 0.22 |
| chr15 | 81810889  | 81811248  | 1700029P11Rik | ENSMUSG00000061633 | 93   | 0.97 | 0.84 | 0.94 | 0.95 | 0.89 | 0.95 |
| chr15 | 84511334  | 84512144  | Prr5          | ENSMUSG00000036106 | 307  | 0.12 | 0.12 | 0.07 | 0.11 | 0.08 | 0.1  |
| chr15 | 98728413  | 98728635  | Dhh           | ENSMUSG00000023000 | 447  | 0.31 | 0.33 | 0.14 | 0.14 | 0.08 | 0.13 |
| chr15 | 91402840  | 91403718  | Slc2a13       | ENSMUSG00000036298 | 322  | 0.11 | 0.11 | 0.06 | 0.15 | 0.05 | 0.07 |
| chr15 | 25551967  | 25553205  | Myo10         | ENSMUSG00000022272 | 306  | 0.11 | 0.09 | 0.12 | 0.13 | 0.07 | 0.18 |
| chr15 | 12669067  | 12669869  | Pdzd2         | ENSMUSG00000022197 | 211  | 1    | 0.21 | 0.14 | 0.12 | 0.51 | 0.2  |
| chr15 | 73475703  | 73476422  | Slc45a4       | ENSMUSG00000079020 | -287 | 0.18 | 0.1  | 0.07 | 0.08 | 0.07 | 0.13 |
| chr15 | 31383117  | 31383638  | Ropn1l        | ENSMUSG00000022236 | 25   | 0.4  | 0.1  | 0.1  | 0.16 | 0.08 | 0.13 |
| chr15 | 58720266  | 58721297  | Rnf139        | ENSMUSG00000037075 | -3   | 0.23 | 0.23 | 0.13 | 0.2  | 0.16 | 0.14 |
| chr15 | 78858322  | 78859291  | H1f0          | ENSMUSG00000048769 | -346 | 0.12 | 0.16 | 0.08 | 0.13 | 0.09 | 0.14 |
| chr15 | 78971273  | 78971902  | 1700088E04Rik | ENSMUSG00000033029 | 30   | 0.22 | 0.15 | 0.08 | 0.15 | 0.12 | 0.12 |
| chr15 | 81020596  | 81021467  | Mkl1          | ENSMUSG00000042292 | -79  | 0.2  | 0.24 | 0.16 | 0.2  | 0.29 | 0.22 |
| chr15 | 8393622   | 8395583   | Nipbl         | ENSMUSG00000022141 | -139 | 0.21 | 0.17 | 0.15 | 0.18 | 0.28 | 0.14 |
| chr15 | 76077198  | 76077632  | Grina         | ENSMUSG00000022564 | 178  | 0.08 | 0.07 | 0.09 | 0.26 | 0.02 | 0.14 |
| chr15 | 83554912  | 83555668  | Scube1        | ENSMUSG00000016763 | 161  | 0.12 | 0.12 | 0.09 | 0.09 | 0.08 | 0.13 |
| chr15 | 57526427  | 57527449  | Zhx2          | ENSMUSG00000071757 | -346 | 0.33 | 0.22 | 0.14 | 0.18 | 0.25 | 0.18 |
| chr15 | 76647543  | 76648777  | Arhgap39      | ENSMUSG00000033697 | 240  | 0.09 | 0.16 | 0.08 | 0.12 | 0.05 | 0.13 |
| chr15 | 25913760  | 25915032  | Zfp622        | ENSMUSG00000052253 | 275  | 0.15 | 0.12 | 0.15 | 0.13 | 0.09 | 0.11 |
| chr15 | 32174540  | 32175960  | Sema5a        | ENSMUSG00000022231 | 682  | 0.17 | 0.17 | 0.13 | 0.19 | 0.08 | 0.17 |
| chr15 | 35085039  | 35085750  | Stk3          | ENSMUSG00000022329 | 30   | 0.21 | 0.14 | 0.09 | 0.16 | 0.12 | 0.16 |
| chr15 | 79376428  | 79377571  | Ddx17         | ENSMUSG00000055065 | 172  | 0.2  | 0.27 | 0.15 | 0.23 | 0.08 | 0.17 |
| chr15 | 81756256  | 81756807  | Polr3h        | ENSMUSG00000022476 | 112  | 0.09 | 0.07 | 0.14 | 0.21 | 0.06 | 0.13 |
| chr15 | 5193924   | 5194466   | Ptger4        | ENSMUSG00000039942 | -23  | 0.29 | 0.4  | 0.08 | 0.18 | 0.12 | 0.17 |
| chr15 | 59146183  | 59146880  | Sqle          | ENSMUSG00000022351 | -101 | 0.06 | 0.18 | 0.09 | 0.12 | 0.1  | 0.12 |
| chr15 | 102076600 | 102076844 | Rarg          | ENSMUSG00000001288 | 209  | 0.44 | 0.24 | 0.05 | 0.1  | 0.24 | 0.13 |
| chr15 | 102820900 | 102821489 | Hoxc8         | ENSMUSG00000001657 | 141  | 0.11 | 0.11 | 0.09 | 0.14 | 0.07 | 0.14 |
| chr15 | 58246886  | 58247457  | D15Ert621e    | ENSMUSG00000037119 | 148  | 0.13 | 0.12 | 0.07 | 0.12 | 0.07 | 0.14 |
| chr15 | 74394337  | 74394597  | Bai1          | ENSMUSG00000034730 | 184  | 0.12 | 0.1  | 0.07 | 0.16 | 0.04 | 0.16 |

|       |           |           |               |                    |      |      |      |      |      |      |      |
|-------|-----------|-----------|---------------|--------------------|------|------|------|------|------|------|------|
| chr15 | 83425119  | 83425697  | Tllf12        | ENSMUSG00000016757 | 179  | 0.27 | 0.23 | 0.2  | 0.27 | 0.56 | 0.21 |
| chr15 | 98885558  | 98886233  | Prph          | ENSMUSG00000023484 | 290  | 0.16 | 0.13 | 0.09 | 0.13 | 0.1  | 0.18 |
| chr15 | 76501975  | 76502374  | Ppp1r16a      | ENSMUSG00000033819 | 129  | 0.18 | 0.13 | 0.09 | 0.08 | 0.09 | 0.15 |
| chr15 | 89329137  | 89330775  | Shank3        | ENSMUSG00000022623 | -98  | 0.13 | 0.26 | 0.15 | 0.16 | 0.19 | 0.14 |
| chr15 | 98397673  | 98398664  | 9330020H09Rik | ENSMUSG00000091050 | 413  | 0.29 | 0.16 | 0.11 | 0.18 | 0.16 | 0.13 |
| chr15 | 102844631 | 102845758 | Mir615        | ENSMUSG00000092424 | -147 | 0.17 | 0.15 | 0.11 | 0.19 | 0.12 | 0.13 |
| chr15 | 66800146  | 66801667  | Gm2895        | ENSMUSG00000091412 | 21   | 0.17 | 0.32 | 0.14 | 0.19 | 0.09 | 0.19 |
| chr15 | 72920684  | 72921339  | Chrac1        | ENSMUSG00000068391 | 189  | 0.16 | 0.29 | 0.1  | 0.15 | 0.08 | 0.18 |
| chr15 | 75509054  | 75509315  | Top1mt        | ENSMUSG00000000934 | 46   | 0.15 | 0.13 | 0.19 | 0.19 | 0.09 | 0.08 |
| chr15 | 83294601  | 83294983  | Pacsin2       | ENSMUSG00000016664 | 208  | 0.37 | 0.31 | 0.11 | 0.26 | 0.62 | 0.11 |
| chr15 | 84062342  | 84062763  | Parvb         | ENSMUSG00000022438 | 79   | 0.09 | 0.24 | 0.09 | 0.23 | 0.26 | 0.11 |
| chr15 | 8588916   | 85889648  | Gramd4        | ENSMUSG00000035900 | 125  | 0.2  | 0.21 | 0.08 | 0.12 | 0.14 | 0.11 |
| chr15 | 8048842   | 8049315   | Wdr70         | ENSMUSG00000039828 | 131  | 0.44 | 0.21 | 0.1  | 0.15 | 0.32 | 0.11 |
| chr15 | 34236386  | 34236883  | Matn2         | ENSMUSG00000022324 | 198  | 0.04 | 0.09 | 0.12 | 0.1  | 0.08 | 0.07 |
| chr15 | 76124785  | 76125689  | Gm10345       | ENSMUSG00000071724 | 373  | 0.09 | 0.13 | 0.16 | 0.17 | 0.14 | 0.17 |
| chr15 | 78892826  | 78893402  | Ankrd54       | ENSMUSG00000033055 | 152  | 0.14 | 0.11 | 0.11 | 0.15 | 0.06 | 0.12 |
| chr15 | 10399539  | 10400443  | Dnajc21       | ENSMUSG00000044224 | 280  | 0.19 | 0.34 | 0.14 | 0.24 | 0.12 | 0.13 |
| chr15 | 31531020  | 31532010  | Cct5          | ENSMUSG00000022234 | -221 | 0.14 | 0.19 | 0.15 | 0.19 | 0.21 | 0.15 |
| chr15 | 34424990  | 34425298  | Hrsp12        | ENSMUSG00000022323 | -134 | 0.5  | NA   | 0.12 | 0.19 | 0.11 | 0.17 |
| chr15 | 78765330  | 78765780  | Nol12         | ENSMUSG00000033099 | 192  | 0.1  | 0.12 | 0.1  | 0.17 | 0.05 | 0.14 |
| chr15 | 93425733  | 93426536  | Prickle1      | ENSMUSG00000036158 | 188  | 0.19 | 0.17 | 0.13 | 0.11 | 0.12 | 0.13 |
| chr15 | 102156477 | 102156802 | Pfdn5         | ENSMUSG00000001289 | 92   | 0.17 | 0.41 | 0.17 | 0.14 | 1    | 0.18 |
| chr15 | 79489085  | 79489850  | 4933432B09Rik | ENSMUSG00000042564 | -288 | 0.16 | 0.18 | 0.07 | 0.11 | 0.06 | 0.09 |
| chr15 | 79842764  | 79845235  | Pdgfb         | ENSMUSG00000000489 | 1239 | 0.13 | 0.12 | 0.1  | 0.16 | 0.1  | 0.16 |
| chr15 | 98622102  | 98623362  | Wnt1          | ENSMUSG00000022997 | 610  | 0.1  | 0.11 | 0.14 | 0.17 | 0.06 | 0.14 |
| chr15 | 44619213  | 44619475  | 2310069G16Rik | ENSMUSG00000085947 | 16   | 0.29 | 0.35 | 0.1  | 0.09 | 0.18 | 0.12 |
| chr15 | 55737852  | 55738662  | Sntb1         | ENSMUSG00000060429 | -392 | 0.14 | 0.23 | 0.15 | 0.18 | 0.1  | 0.16 |
| chr15 | 60654525  | 60656630  | 9930014A18Rik | ENSMUSG00000044513 | -319 | 0.17 | 0.12 | 0.15 | 0.17 | 0.11 | 0.17 |
| chr15 | 100592011 | 100592671 | Slc4a8        | ENSMUSG00000023032 | 163  | 0.2  | 0.23 | 0.1  | 0.17 | 0.28 | 0.12 |
| chr15 | 51822546  | 51823519  | Rad21         | ENSMUSG00000022314 | 274  | 0.15 | 0.21 | 0.16 | 0.15 | 0.11 | 0.11 |

|       |           |           |               |                    |      |      |      |      |      |      |      |
|-------|-----------|-----------|---------------|--------------------|------|------|------|------|------|------|------|
| chr15 | 82176289  | 82176740  | 1500032L24Rik | ENSMUSG00000022452 | 130  | 0.14 | 0.1  | 0.09 | 0.16 | 0.1  | 0.16 |
| chr15 | 83935878  | 83936359  | Sult4a1       | ENSMUSG00000018865 | -74  | 0.31 | 1    | 0.11 | 0.4  | 0.16 | 0.12 |
| chr15 | 84817986  | 84818215  | 5031439G07Rik | ENSMUSG00000036046 | 301  | 1    | 0.11 | 0.08 | 0.07 | 0.12 | 0.08 |
| chr15 | 76528292  | 76528512  | Gpt           | ENSMUSG00000022546 | 1239 | 0.5  | 0.38 | 0.34 | 0.56 | 0.21 | 0.48 |
| chr15 | 88970519  | 88971222  | Mapk12        | ENSMUSG00000022610 | 263  | 0.17 | 0.22 | 0.13 | 0.19 | 0.13 | 0.16 |
| chr15 | 98905034  | 98905533  | Troap         | ENSMUSG00000032783 | 277  | 0.09 | 0.15 | 0.09 | 0.15 | 0.17 | 0.18 |
| chr15 | 66409041  | 66409688  | Phf20l1       | ENSMUSG00000072501 | 236  | 0.11 | 0.19 | 0.09 | 0.15 | 0.08 | 0.12 |
| chr15 | 75446556  | 75447381  | Zfp41         | ENSMUSG00000047003 | -141 | 0.08 | 0.14 | 0.1  | 0.13 | 0.14 | 0.16 |
| chr15 | 75899533  | 75900313  | Scrib         | ENSMUSG00000022568 | 227  | 0.12 | 0.07 | 0.08 | 0.13 | 0.09 | 0.11 |
| chr15 | 90879579  | 90880478  | Kif21a        | ENSMUSG00000022629 | 351  | 0.15 | 0.21 | 0.1  | 0.14 | 0.11 | 0.16 |
| chr15 | 101975000 | 101975314 | Igfbp6        | ENSMUSG00000023046 | 364  | 0.09 | 0.14 | 0.12 | 0.17 | 0.15 | 0.18 |
| chr15 | 38591545  | 38591960  | Atp6v1c1      | ENSMUSG00000022295 | 93   | 0.13 | 0.12 | 0.08 | 0.13 | 0.1  | 0.13 |
| chr15 | 79762815  | 79763231  | Cbx7          | ENSMUSG00000053411 | -77  | 0.25 | 0.09 | 0.09 | 0.14 | 0.11 | 0.13 |
| chr15 | 84022492  | 84022918  | Samm50        | ENSMUSG00000022437 | 42   | 0.34 | 0.44 | 0.11 | 0.18 | 0.22 | 0.16 |
| chr15 | 64213737  | 64214581  | Asap1         | ENSMUSG00000022377 | 135  | 0.29 | 0.31 | 0.14 | 0.19 | 0.23 | 0.17 |
| chr15 | 81575444  | 81575774  | Zc3h7b        | ENSMUSG00000022390 | 331  | 0.4  | 0.23 | 0.21 | 0.21 | 0.19 | 0.25 |
| chr15 | 97661415  | 97662166  | Hdac7         | ENSMUSG00000022475 | 110  | 0.31 | 0.31 | 0.11 | 0.15 | 0.26 | 0.15 |
| chr15 | 102455669 | 102456099 | Atf7          | ENSMUSG00000052414 | -32  | 1    | 1    | 0.07 | 0.13 | 0.12 | 0.12 |
| chr15 | 79763859  | 79764068  | Cbx7          | ENSMUSG00000053411 | 297  | 0.19 | 0.07 | 0.11 | 0.25 | 0.07 | 0.19 |
| chr15 | 101966306 | 101966947 | Spryd3        | ENSMUSG00000036966 | -3   | 0.27 | 0.14 | 0.11 | 0.17 | 0.22 | 0.13 |
| chr15 | 51708816  | 51709342  | Utp23         | ENSMUSG00000022313 | 104  | 1    | NA   | 0.14 | 0.08 | 0.14 | 0.19 |
| chr15 | 75576481  | 75578594  | Mafa          | ENSMUSG00000047591 | 815  | 0.14 | 0.13 | 0.11 | 0.15 | 0.12 | 0.16 |
| chr15 | 75671984  | 75672525  | Zc3h3         | ENSMUSG00000075600 | 91   | 0.13 | 0.15 | 0.12 | 0.11 | 0.27 | 0.13 |
| chr15 | 81524002  | 81525474  | Chadl         | ENSMUSG00000063765 | -280 | 0.1  | 0.1  | 0.1  | 0.11 | 0.08 | 0.11 |
| chr15 | 12134535  | 12135443  | Mtmr12        | ENSMUSG00000039458 | 206  | 0.12 | 0.18 | 0.12 | 0.14 | 0.1  | 0.13 |
| chr15 | 76540567  | 76541429  | Recq4         | ENSMUSG00000033762 | -35  | 0.16 | 0.13 | 0.11 | 0.16 | 0.11 | 0.12 |
| chr15 | 80778543  | 80779188  | Adsl          | ENSMUSG00000022407 | -55  | 0.06 | 0.1  | 0.15 | 0.22 | 0.19 | 0.21 |
| chr15 | 98661211  | 98662006  | Prkag1        | ENSMUSG00000067713 | 331  | 0.39 | 0.09 | 0.1  | 0.18 | 0.17 | 0.15 |
| chr15 | 102501175 | 102501588 | Atp5g2        | ENSMUSG00000062683 | 97   | 0.21 | 0.3  | 0.12 | 0.15 | 0.1  | 0.14 |
| chr15 | 76062415  | 76063373  | Plec          | ENSMUSG00000022565 | -419 | 0.32 | 0.17 | 0.17 | 0.48 | 0.22 | 0.21 |

|       |           |           |               |                    |      |      |      |      |      |      |      |
|-------|-----------|-----------|---------------|--------------------|------|------|------|------|------|------|------|
| chr15 | 95358177  | 95359143  | Nell2         | ENSMUSG00000022454 | 23   | 0.11 | 0.11 | 0.09 | 0.14 | 0.15 | 0.12 |
| chr15 | 34372676  | 34373449  | Rpl30         | ENSMUSG00000058600 | -147 | 0.15 | 0.1  | 0.09 | 0.11 | 0.11 | 0.15 |
| chr15 | 66117343  | 66118467  | Kcnq3         | ENSMUSG00000056258 | -119 | 0.11 | 0.18 | 0.09 | 0.15 | 0.07 | 0.09 |
| chr15 | 36070029  | 36070336  | Rgs22         | ENSMUSG00000037627 | -42  | 0.16 | 0.46 | 0.23 | 0.49 | 0.22 | 0.29 |
| chr15 | 38007699  | 38008872  | Ubr5          | ENSMUSG00000037487 | 323  | 0.19 | 0.17 | 0.1  | 0.13 | 0.16 | 0.12 |
| chr15 | 38837622  | 38838244  | Gm17265       | ENSMUSG00000091397 | -202 | 0.37 | 0.29 | 0.11 | 0.16 | 0.3  | 0.12 |
| chr15 | 59479077  | 59481165  | Trib1         | ENSMUSG00000032501 | 216  | 0.21 | 0.2  | 0.11 | 0.14 | 0.18 | 0.14 |
| chr15 | 76161429  | 76161954  | Gpaa1         | ENSMUSG00000022561 | 30   | 0.33 | NA   | 0.25 | 0.12 | 1    | 0.13 |
| chr15 | 100325212 | 100325934 | Csmp2         | ENSMUSG00000044636 | 97   | 0.13 | 0.29 | 0.14 | 0.17 | 0.17 | 0.12 |
| chr15 | 79233247  | 79233880  | Tmem184b      | ENSMUSG0000009035  | 170  | 0.09 | 0.09 | 0.09 | 0.1  | 0.13 | 0.13 |
| chr15 | 80117554  | 80118811  | Cacna1i       | ENSMUSG00000022416 | 514  | 0.19 | 0.19 | 0.1  | 0.12 | 0.21 | 0.13 |
| chr15 | 81229765  | 81230596  | Stt13         | ENSMUSG00000022403 | -367 | 0.12 | 0.21 | 0.14 | 0.17 | 0.16 | 0.13 |
| chr15 | 98606751  | 98607439  | Wnt10b        | ENSMUSG00000022996 | 597  | 0.09 | 0.14 | 0.11 | 0.17 | 0.07 | 0.16 |
| chr15 | 38943867  | 38944734  | Slc25a32      | ENSMUSG00000022299 | -38  | 0.11 | 0.17 | 0.08 | 0.12 | 0.08 | 0.1  |
| chr15 | 79963447  | 79964021  | Tab1          | ENSMUSG00000022414 | 150  | 0.24 | 0.1  | 0.15 | 0.24 | 0.12 | 0.24 |
| chr15 | 3929154   | 3929562   | Fbxo4         | ENSMUSG00000022184 | 215  | 0.25 | 0.3  | 0.08 | 0.11 | 0.21 | 0.11 |
| chr15 | 78259063  | 78259369  | Kctd17        | ENSMUSG00000033287 | 124  | 0.5  | 0.26 | 0.16 | 0.15 | 0.06 | 0.23 |
| chr15 | 76552567  | 76553364  | Lrrc24        | ENSMUSG00000033707 | -376 | 0.11 | 0.1  | 0.07 | 0.11 | 0.08 | 0.07 |
| chr15 | 83002143  | 83002804  | Cyb5r3        | ENSMUSG00000018042 | 159  | 0.36 | 0.16 | 0.1  | 0.18 | 0.24 | 0.22 |
| chr15 | 78707491  | 78708295  | Gga1          | ENSMUSG00000033128 | 273  | 0.16 | 0.13 | 0.09 | 0.12 | 0.13 | 0.12 |
| chr15 | 95484699  | 95485146  | Dbx2          | ENSMUSG00000045608 | 1469 | 0.12 | 0.2  | 0.09 | 0.15 | 0.09 | 0.14 |
| chr15 | 34167795  | 34168524  | Laptm4b       | ENSMUSG00000022257 | 378  | 0.13 | 0.14 | 0.12 | 0.18 | 0.17 | 0.17 |
| chr15 | 78034655  | 78034944  | Pvalb         | ENSMUSG00000005716 | -132 | 0.14 | 0.2  | 0.11 | 0.12 | 0.05 | 0.17 |
| chr15 | 98493094  | 98493453  | Ddx23         | ENSMUSG00000003360 | 16   | 0.22 | 0.5  | 0.1  | 0.15 | 0.12 | 0.19 |
| chr15 | 78758450  | 78758689  | Lgals1        | ENSMUSG00000068220 | 1414 | 0.06 | 0.13 | 0.12 | 0.17 | 0.1  | 0.09 |
| chr15 | 84683893  | 84686990  | Phf21b        | ENSMUSG00000016624 | 99   | 0.13 | 0.16 | 0.11 | 0.15 | 0.12 | 0.14 |
| chr15 | 57907227  | 57908741  | Zhx1          | ENSMUSG00000022361 | -246 | 0.08 | 0.12 | 0.07 | 0.12 | 0.14 | 0.14 |
| chr15 | 64143825  | 64144775  | Asap1         | ENSMUSG00000022377 | -99  | 0.16 | 0.26 | 0.11 | 0.15 | 0.2  | 0.15 |
| chr15 | 95620903  | 95621764  | Ano6          | ENSMUSG00000064210 | 59   | 0.15 | 0.13 | 0.11 | 0.16 | 0.11 | 0.18 |
| chr15 | 101114227 | 101114919 | 9430023L20Rik | ENSMUSG00000037204 | -159 | 0.09 | 0.09 | 0.1  | 0.13 | 0.12 | 0.09 |

|       |           |           |               |                    |      |      |      |      |      |      |      |
|-------|-----------|-----------|---------------|--------------------|------|------|------|------|------|------|------|
| chr15 | 73578625  | 73579055  | Ptp4a3        | ENSMUSG00000059895 | 384  | 0.1  | 0.26 | 0.14 | 0.15 | 0.14 | 0.17 |
| chr15 | 75739255  | 75741281  | Eef1d         | ENSMUSG00000055762 | -547 | 0.1  | 0.13 | 0.11 | 0.16 | 0.08 | 0.11 |
| chr15 | 75811878  | 75812655  | 2410075B13Rik | ENSMUSG00000044095 | 449  | 0.07 | 0.07 | 0.09 | 0.21 | 0.09 | 0.1  |
| chr15 | 77136661  | 77137679  | Rbfox2        | ENSMUSG00000033565 | 313  | 0.12 | 0.13 | 0.09 | 0.14 | 0.1  | 0.14 |
| chr15 | 76352434  | 76354319  | Scrt1         | ENSMUSG00000048385 | -817 | 0.18 | 0.21 | 0.13 | 0.16 | 0.14 | 0.18 |
| chr15 | 5192329   | 5192792   | Ptger4        | ENSMUSG00000039942 | 150  | 0.16 | 0.15 | 0.13 | 0.19 | 0.13 | 0.12 |
| chr15 | 78905565  | 78905924  | Eif3l         | ENSMUSG00000033047 | 91   | 0.09 | 0.25 | 0.07 | 0.07 | 0.11 | 0.16 |
| chr15 | 79634211  | 79635395  | Nptxr         | ENSMUSG00000022421 | 85   | 0.11 | 0.11 | 0.1  | 0.11 | 0.13 | 0.1  |
| chr15 | 11329179  | 11329486  | Tars          | ENSMUSG00000022241 | 81   | 0.1  | NA   | 0.07 | 0.15 | 0.05 | 0.11 |
| chr15 | 25710845  | 25711620  | Myo10         | ENSMUSG00000022272 | 1287 | 0.9  | 0.88 | 0.79 | 0.83 | 0.93 | 0.88 |
| chr15 | 31153876  | 31154499  | Dap           | ENSMUSG00000039168 | 47   | 0.12 | 0.3  | 0.1  | 0.11 | 0.17 | 0.11 |
| chr15 | 63829112  | 63829959  | Fam49b        | ENSMUSG00000022378 | -11  | 0.12 | 0.14 | 0.12 | 0.13 | 0.1  | 0.12 |
| chr15 | 85340995  | 85341196  | Gm4825        | ENSMUSG00000063548 | -147 | 0.75 | 0.74 | 0.61 | 0.65 | 0.7  | 0.82 |
| chr15 | 93166503  | 93167805  | Yaf2          | ENSMUSG00000022634 | 85   | 0.12 | 0.12 | 0.09 | 0.13 | 0.11 | 0.16 |
| chr15 | 98887281  | 98887589  | Prph          | ENSMUSG00000023484 | 1830 | 0.44 | 0.5  | 0.15 | 0.25 | 0.33 | 0.21 |
| chr15 | 99054152  | 99055294  | Kcnh3         | ENSMUSG00000037579 | -569 | 0.12 | 0.17 | 0.1  | 0.17 | 0.15 | 0.12 |
| chr15 | 102751736 | 102752623 | Hoxc13        | ENSMUSG0000001655  | 645  | 0.1  | 0.17 | 0.11 | 0.15 | 0.12 | 0.14 |
| chr15 | 81296627  | 81297387  | Rbx1          | ENSMUSG00000022400 | 261  | 0.5  | 0.5  | 0.14 | 0.12 | 0.25 | 0.19 |
| chr15 | 84962095  | 84962610  | Smc1b         | ENSMUSG00000022432 | 35   | 0.21 | 0.13 | 0.21 | 0.25 | 0.25 | 0.25 |
| chr15 | 100135400 | 100135656 | Mettl7a1      | ENSMUSG00000054619 | 254  | 0.22 | 0.79 | 0.31 | 0.61 | 1    | 0.2  |
| chr15 | 102841168 | 102841410 | Hoxc6         | ENSMUSG0000001661  | 1379 | 0.2  | NA   | 0.2  | 0.24 | 1    | 0.31 |
| chr15 | 75759918  | 75760372  | Tsta3         | ENSMUSG00000022570 | 15   | 0.24 | 0.57 | 0.14 | 0.33 | 0.15 | 0.16 |
| chr15 | 79521189  | 79521835  | Gtpbp1        | ENSMUSG00000042535 | 192  | 0.12 | 0.15 | 0.18 | 0.15 | 0.11 | 0.13 |
| chr15 | 74502368  | 74503233  | Arc           | ENSMUSG00000022602 | 182  | 0.06 | 0.37 | 0.11 | 0.15 | 0.09 | 0.22 |
| chr15 | 85036447  | 85036820  | Fbln1         | ENSMUSG00000006369 | 198  | 0.08 | 0.07 | 0.11 | 0.14 | 0.06 | 0.15 |
| chr15 | 97923233  | 97924073  | Senp1         | ENSMUSG00000033075 | 183  | 0.23 | 0.21 | 0.11 | 0.14 | 0.19 | 0.18 |
| chr15 | 72376355  | 72378241  | Kcnk9         | ENSMUSG00000036760 | -589 | 0.1  | 0.18 | 0.1  | 0.14 | 0.12 | 0.18 |
| chr15 | 89185748  | 89186467  | Lmf2          | ENSMUSG00000022614 | -17  | 0.15 | 0.15 | 0.1  | 0.17 | 0.13 | 0.1  |
| chr15 | 102866162 | 102866398 | Hoxc4         | ENSMUSG00000075394 | 1454 | 0.1  | 0.67 | 0.17 | 0.24 | 0.26 | 0.17 |
| chr15 | 5093492   | 5094220   | Prkaa1        | ENSMUSG00000050697 | -5   | 0.11 | 0.12 | 0.08 | 0.1  | 0.08 | 0.11 |

|       |           |           |               |                    |       |      |      |      |      |      |      |
|-------|-----------|-----------|---------------|--------------------|-------|------|------|------|------|------|------|
| chr15 | 78672848  | 78673569  | Cdc42ep1      | ENSMUSG00000049521 | 131   | 0.11 | 0.16 | 0.09 | 0.16 | 0.09 | 0.21 |
| chr15 | 26824659  | 26825526  | Fbxl7         | ENSMUSG00000043556 | 181   | 0.08 | 0.12 | 0.12 | 0.13 | 0.09 | 0.11 |
| chr15 | 75839492  | 75840335  | K230010J24Rik | ENSMUSG00000075594 | 414   | 0.14 | 0.11 | 0.14 | 0.16 | 0.16 | 0.14 |
| chr15 | 76531916  | 76532298  | Mfsd3         | ENSMUSG00000019080 | 135   | 0.13 | 0.13 | 0.09 | 0.17 | 0.09 | 0.13 |
| chr15 | 99481735  | 99482202  | Racgap1       | ENSMUSG00000023015 | 32    | 0.24 | 0.25 | 0.07 | 0.13 | 0.18 | 0.12 |
| chr15 | 99532474  | 99532929  | Smarcd1       | ENSMUSG00000023018 | -17   | 0.13 | 0.27 | 0.11 | 0.17 | 0.16 | 0.16 |
| chr15 | 54783916  | 54784248  | Gm16639       | ENSMUSG00000086024 | -421  | 0.1  | 0.1  | 0.09 | 0.16 | 0.12 | 0.1  |
| chr15 | 79059604  | 79060123  | Pick1         | ENSMUSG00000068206 | 51    | 0.1  | 0.07 | 0.09 | 0.16 | 0.15 | 0.19 |
| chr15 | 89354375  | 89354713  | Shank3        | ENSMUSG00000022623 | -209  | 0.17 | 0.41 | 0.13 | 0.14 | 0.15 | 0.16 |
| chr15 | 93349446  | 93350032  | Prickle1      | ENSMUSG00000036158 | 215   | 0.09 | 0.11 | 0.08 | 0.16 | 0.06 | 0.14 |
| chr15 | 98764321  | 98765114  | Tuba1b        | ENSMUSG00000023004 | 152   | 0.6  | 0.16 | 0.14 | 0.22 | 0.38 | 0.16 |
| chr15 | 36426020  | 36426656  | Ankrd46       | ENSMUSG00000048307 | 208   | 0.11 | 0.13 | 0.06 | 0.22 | 0.09 | 0.1  |
| chr15 | 53177146  | 53178093  | Ext1          | ENSMUSG00000061731 | -405  | 0.31 | 0.25 | 0.17 | 0.16 | 0.21 | 0.14 |
| chr15 | 99304805  | 99305207  | Bodin3d       | ENSMUSG00000037525 | 155   | 0.13 | 0.19 | 0.11 | 0.18 | 0.09 | 0.16 |
| chr15 | 76437730  | 76438124  | Cpsf1         | ENSMUSG00000034022 | 94    | 0.13 | 0.07 | 0.12 | 0.12 | 0.12 | 0.13 |
| chr15 | 83180380  | 83180969  | Arfgap3       | ENSMUSG00000054277 | 3     | 0.24 | 0.86 | 0.19 | 0.34 | 0.31 | 0.26 |
| chr15 | 99420893  | 99421375  | Aqp5          | ENSMUSG00000044217 | -146  | 0.11 | 0.16 | 0.08 | 0.16 | 0.1  | 0.13 |
| chr15 | 76368476  | 76369449  | Fbxl6         | ENSMUSG00000022559 | 214   | 0.17 | 0.13 | 0.1  | 0.2  | 0.15 | 0.12 |
| chr15 | 101096876 | 101097507 | Nr4a1         | ENSMUSG00000023034 | -86   | 0.11 | 0.14 | 0.16 | 0.16 | 0.15 | 0.18 |
| chr15 | 30102113  | 30103303  | Ctnnd2        | ENSMUSG00000022240 | 360   | 0.24 | 0.14 | 0.13 | 0.14 | 0.21 | 0.15 |
| chr15 | 102786734 | 102786980 | Hoxc11        | ENSMUSG00000001656 | 1999  | 0.13 | 0.24 | 0.11 | 0.23 | 0.1  | 0.21 |
| chr15 | 36936688  | 36937552  | Zfp706        | ENSMUSG00000062397 | 37    | 0.12 | 0.17 | 0.11 | 0.15 | 0.14 | 0.15 |
| chr15 | 43001784  | 43002242  | Rspo2         | ENSMUSG00000051920 | 351   | 0.17 | 0.1  | 0.11 | 0.16 | 0.11 | 0.15 |
| chr15 | 75864801  | 75865520  | U1            | ENSMUSG00000089396 | -1729 | 0.34 | 0.6  | 0.31 | 0.25 | 0.31 | 0.49 |
| chr15 | 80085524  | 80086566  | Atf4          | ENSMUSG00000042406 | 431   | 0.14 | 0.14 | 0.14 | 0.18 | 0.12 | 0.16 |
| chr15 | 7347833   | 7348528   | Gm16029       | ENSMUSG00000090199 | 283   | 0.13 | 0.08 | 0.1  | 0.13 | 0.07 | 0.11 |
| chr15 | 12754198  | 12755103  | 6030458C11Rik | ENSMUSG00000022195 | -238  | 0.11 | 0.12 | 0.1  | 0.13 | 0.1  | 0.11 |
| chr15 | 25342143  | 25343450  | Basp1         | ENSMUSG00000045763 | 723   | 0.19 | 0.08 | 0.1  | 0.14 | 0.16 | 0.13 |
| chr15 | 38228754  | 38231448  | Klf10         | ENSMUSG00000037465 | -635  | 0.12 | 0.12 | 0.14 | 0.15 | 0.11 | 0.13 |
| chr15 | 74551420  | 74552293  | 4930572J05Rik | ENSMUSG00000056665 | 192   | 0.11 | 0.21 | 0.09 | 0.17 | 0.07 | 0.17 |

|       |           |           |               |                     |      |      |      |      |      |      |      |
|-------|-----------|-----------|---------------|---------------------|------|------|------|------|------|------|------|
| chr15 | 97535859  | 97536343  | Rpap3         | ENSMUSG00000022466  | 152  | 0.12 | 0.13 | 0.09 | 0.12 | 0.13 | 0.15 |
| chr15 | 100381829 | 100382700 | Tfcp2         | ENSMUSG00000009733  | 175  | 0.23 | 0.24 | 0.12 | 0.15 | 0.2  | 0.16 |
| chr15 | 101930594 | 101931228 | Tenc1         | ENSMUSG000000037003 | 2    | 0.17 | 0.17 | 0.08 | 0.1  | 0.13 | 0.18 |
| chr15 | 76553833  | 76554489  | C030006K11Rik | ENSMUSG00000079002  | 114  | 0.11 | 0.21 | 0.11 | 0.15 | 0.13 | 0.12 |
| chr15 | 99802905  | 99804164  | Larp4         | ENSMUSG00000023025  | 323  | 0.07 | 0.13 | 0.13 | 0.13 | 0.06 | 0.13 |
| chr15 | 88692255  | 88694294  | Pim3          | ENSMUSG00000035828  | 658  | 0.12 | 0.16 | 0.1  | 0.14 | 0.11 | 0.11 |
| chr15 | 93228574  | 93228969  | Zcrb1         | ENSMUSG00000022635  | -67  | 0.1  | 0.19 | 0.16 | 0.12 | 0.14 | 0.17 |
| chr15 | 97998211  | 97999167  | Al836003      | ENSMUSG00000029875  | 452  | 0.23 | 0.15 | 0.13 | 0.21 | 0.18 | 0.16 |
| chr15 | 98602976  | 98603283  | Wnt10b        | ENSMUSG00000022996  | 1794 | 0.12 | 0.26 | 0.12 | 0.13 | 0.09 | 0.24 |
| chr15 | 10415423  | 10416263  | Brix1         | ENSMUSG00000022247  | -201 | 0.23 | 0.13 | 0.11 | 0.25 | 0.18 | 0.2  |
| chr15 | 76555151  | 76555525  | Arhgap39      | ENSMUSG000000033697 | 695  | 0.09 | 0.1  | 0.08 | 0.13 | 0.11 | 0.14 |
| chr15 | 85690109  | 85690474  | Gtse1         | ENSMUSG00000022385  | 154  | 0.08 | 0.12 | 0.11 | 0.1  | 0.07 | 0.11 |
| chr15 | 98620013  | 98620589  | Wnt1          | ENSMUSG00000022997  | 13   | 0.22 | 0.18 | 0.09 | 0.26 | 0.27 | 0.17 |
| chr15 | 98637297  | 98637525  | B130046B21Rik | ENSMUSG00000085373  | -52  | 0.38 | 1    | 0.08 | 0.14 | 0.2  | 0.18 |
| chr15 | 100429807 | 100430420 | Pou6f1        | ENSMUSG00000009739  | 182  | 0.14 | 0.17 | 0.2  | 0.22 | 0.16 | 0.22 |
| chr15 | 78939244  | 78940091  | Micall1       | ENSMUSG00000033039  | 254  | 0.1  | 0.17 | 0.13 | 0.11 | 0.11 | 0.15 |
| chr15 | 84387846  | 84388306  | Ldoc1l        | ENSMUSG00000055745  | -154 | 0.42 | 0.59 | 0.15 | 0.23 | 0.37 | 0.11 |
| chr15 | 96290384  | 96291842  | Scaf11        | ENSMUSG00000033228  | 161  | 0.1  | 0.15 | 0.11 | 0.12 | 0.09 | 0.12 |
| chr15 | 98748031  | 98748759  | Lmbr1l        | ENSMUSG00000022999  | -214 | 0.05 | 0.08 | 0.1  | 0.16 | 0.06 | 0.16 |
| chr15 | 79604657  | 79605057  | Dnalc4        | ENSMUSG00000022420  | -44  | 0.33 | 0.18 | 0.12 | 0.13 | 0.1  | 0.14 |
| chr15 | 82054610  | 82054833  | Tnfrsf13c     | ENSMUSG00000068105  | 45   | 0.1  | 0.13 | 0.09 | 0.12 | 0.15 | 0.13 |
| chr15 | 88721090  | 88721411  | RP23-455J20.1 | ENSMUSG00000093394  | 663  | 0.45 | 1    | 0.12 | 0.17 | 0.62 | 1    |
| chr15 | 77671610  | 77673035  | Myh9          | ENSMUSG00000022443  | 155  | 0.1  | 0.14 | 0.1  | 0.14 | 0.09 | 0.17 |
| chr15 | 31460041  | 31461204  | 6-Mar         | ENSMUSG00000039100  | 170  | 0.14 | 0.12 | 0.1  | 0.14 | 0.15 | 0.13 |
| chr15 | 63891555  | 63892369  | Fam49b        | ENSMUSG00000022378  | 48   | 0.17 | 0.24 | 0.07 | 0.12 | 0.18 | 0.13 |
| chr15 | 76199268  | 76200025  | Fam203a       | ENSMUSG00000022554  | 318  | 0.13 | 0.14 | 0.08 | 0.14 | 0.15 | 0.14 |
| chr15 | 85651866  | 85652324  | Pkdrej        | ENSMUSG00000052496  | 68   | 0.08 | 0.09 | 0.09 | 0.1  | 0.07 | 0.11 |
| chr15 | 89421804  | 89422384  | Rabl2         | ENSMUSG00000022621  | 176  | 0.36 | 0.35 | 0.12 | 0.17 | 0.47 | 0.15 |
| chr15 | 35225738  | 35226642  | Osr2          | ENSMUSG00000022330  | 337  | 0.2  | 0.11 | 0.12 | 0.15 | 0.23 | 0.18 |
| chr15 | 82979280  | 82979861  | Poldip3       | ENSMUSG00000041815  | 161  | 0.12 | 0.11 | 0.1  | 0.12 | 0.11 | 0.13 |



|       |           |           |          |                    |      |      |      |      |      |      |      |
|-------|-----------|-----------|----------|--------------------|------|------|------|------|------|------|------|
| chr15 | 96115317  | 96118941  | Arid2    | ENSMUSG00000033237 | -820 | 0.09 | 0.12 | 0.1  | 0.13 | 0.1  | 0.12 |
| chr15 | 102109725 | 102110221 | Mfsd5    | ENSMUSG00000045665 | 86   | 0.18 | 0.19 | 0.15 | 0.14 | 0.16 | 0.19 |
| chr15 | 85166552  | 85167329  | Atxn10   | ENSMUSG00000016541 | 172  | 0.5  | NA   | 0.13 | 0.1  | 0.12 | 0.11 |
| chr15 | 76490530  | 76491181  | Cyhr1    | ENSMUSG00000053929 | -317 | 0.14 | 0.23 | 0.12 | 0.32 | 0.16 | 0.15 |
| chr15 | 51696675  | 51697212  | Eif3h    | ENSMUSG00000022312 | 67   | 0.1  | 0.2  | 0.15 | 0.14 | 0.09 | 0.17 |
| chr15 | 79501189  | 79501804  | Tomm22   | ENSMUSG00000022427 | 205  | 0.14 | 0.16 | 0.11 | 0.13 | 0.15 | 0.09 |
| chr15 | 97077380  | 97078269  | Fam113b  | ENSMUSG00000044250 | 286  | 0.18 | 0.21 | 0.11 | 0.19 | 0.19 | 0.15 |
| chr15 | 103196525 | 103197162 | Itga5    | ENSMUSG00000000555 | 351  | 0.16 | 0.23 | 0.09 | 0.14 | 0.11 | 0.19 |
| chr15 | 88813179  | 88813599  | Mov10l1  | ENSMUSG00000015365 | 50   | 0.93 | 0.78 | 0.82 | 0.7  | 0.91 | 0.92 |
| chr15 | 9070022   | 9070895   | Skp2     | ENSMUSG00000054115 | -251 | 0.13 | 0.15 | 0.11 | 0.2  | 0.16 | 0.17 |
| chr15 | 77800870  | 77801635  | Eif3d    | ENSMUSG00000016554 | 2    | 0.13 | 0.13 | 0.1  | 0.2  | 0.12 | 0.14 |
| chr15 | 100058054 | 100059054 | Atf1     | ENSMUSG00000023027 | 304  | 0.14 | 0.21 | 0.09 | 0.16 | 0.15 | 0.12 |
| chr15 | 100559419 | 100560171 | Galnt6   | ENSMUSG00000037280 | 12   | 0.25 | 0.11 | 0.13 | 0.23 | 0.16 | 0.14 |
| chr15 | 89145089  | 89145981  | Sbf1     | ENSMUSG00000036529 | 151  | 0.15 | 0.21 | 0.1  | 0.13 | 0.16 | 0.12 |
| chr15 | 97794510  | 97794862  | Tmem106c | ENSMUSG00000052369 | -24  | 0.13 | 0.15 | 0.09 | 0.11 | 0.08 | 0.13 |
| chr15 | 98917627  | 98918982  | C1q4     | ENSMUSG0000001076  | -56  | 0.42 | 0.69 | 0.45 | 0.49 | 0.38 | 0.34 |
| chr15 | 102784748 | 102785736 | Hoxc11   | ENSMUSG0000001656  | 384  | 0.09 | 0.07 | 0.11 | 0.14 | 0.11 | 0.12 |
| chr15 | 3976394   | 3977616   | Oxct1    | ENSMUSG00000022186 | 321  | 0.06 | 0.12 | 0.09 | 0.12 | 0.05 | 0.15 |
| chr15 | 98860641  | 98861098  | Tuba1c   | ENSMUSG00000043091 | 547  | 0.16 | 0.19 | 0.16 | 0.34 | 0.12 | 0.15 |
| chr15 | 36537805  | 36539451  | Pabpc1   | ENSMUSG00000022283 | 100  | 0.12 | 0.13 | 0.13 | 0.15 | 0.11 | 0.14 |
| chr15 | 83357035  | 83357975  | Bik      | ENSMUSG00000016758 | 213  | 0.13 | 0.18 | 0.16 | 0.17 | 0.15 | 0.17 |
| chr15 | 89671952  | 89672472  | Syt10    | ENSMUSG00000063260 | 79   | 0.08 | 0.07 | 0.13 | 0.1  | 0.05 | 0.11 |
| chr15 | 79572569  | 79573310  | Sun2     | ENSMUSG00000042524 | -53  | 0.12 | 0.13 | 0.09 | 0.13 | 0.13 | 0.12 |
| chr15 | 82074572  | 82075224  | Cenpm    | ENSMUSG00000068101 | 279  | 0.12 | 0.23 | 0.15 | 0.17 | 0.09 | 0.21 |
| chr15 | 90509516  | 90510609  | Cpne8    | ENSMUSG00000052560 | -272 | 0.09 | 0.17 | 0.1  | 0.17 | 0.09 | 0.14 |
| chr15 | 57966047  | 57966952  | Atad2    | ENSMUSG00000022360 | 138  | 0.17 | 0.11 | 0.09 | 0.18 | 0.19 | 0.17 |
| chr15 | 98592864  | 98593843  | Arf3     | ENSMUSG00000051853 | 70   | 0.12 | 0.15 | 0.12 | 0.14 | 0.11 | 0.12 |
| chr15 | 73669799  | 73670400  | Gm628    | ENSMUSG00000072487 | 2    | 0.22 | 0.13 | 0.12 | 0.18 | 0.2  | 0.14 |
| chr15 | 78632798  | 78633632  | Card10   | ENSMUSG00000033170 | -116 | 0.13 | 0.19 | 0.14 | 0.15 | 0.12 | 0.16 |
| chr15 | 81576173  | 81576461  | Zc3h7b   | ENSMUSG00000022390 | 1039 | 0.07 | 0.11 | 0.09 | 0.11 | 0.05 | 0.13 |

|       |           |           |               |                     |       |      |      |      |      |      |      |
|-------|-----------|-----------|---------------|---------------------|-------|------|------|------|------|------|------|
| chr15 | 88581599  | 88582854  | Zbed4         | ENSMUSG00000034333  | 136   | 0.13 | 0.16 | 0.08 | 0.13 | 0.1  | 0.1  |
| chr15 | 88649479  | 88650547  | Alg12         | ENSMUSG00000035845  | -491  | 0.13 | 0.17 | 0.09 | 0.13 | 0.12 | 0.12 |
| chr15 | 38448017  | 38449482  | Azin1         | ENSMUSG00000037458  | 175   | 0.08 | 0.3  | 0.12 | 0.21 | 0.09 | 0.16 |
| chr15 | 78873095  | 78873823  | Gcat          | ENSMUSG00000006378  | 1144  | 0.19 | 0.28 | 0.12 | 0.16 | 0.23 | 0.16 |
| chr15 | 75922018  | 75922234  | Nrbp2         | ENSMUSG000000075590 | -1683 | 0.1  | 0.2  | 0.08 | 0.14 | 0.14 | 0.18 |
| chr15 | 98465002  | 98465780  | Cacnb3        | ENSMUSG00000003352  | 196   | 0.17 | 0.15 | 0.11 | 0.18 | 0.18 | 0.15 |
| chr15 | 40486419  | 40487392  | Zfpm2         | ENSMUSG000000022306 | 317   | 0.12 | 0.25 | 0.09 | 0.17 | 0.12 | 0.11 |
| chr15 | 88953358  | 88953650  | Tubgcp6       | ENSMUSG000000051786 | 13    | 0.1  | NA   | 0.13 | 0.08 | 0.07 | 0.15 |
| chr15 | 89203942  | 89204606  | Sco2          | ENSMUSG000000091780 | -1394 | 0.21 | 0.17 | 0.13 | 0.2  | 0.23 | 0.25 |
| chr15 | 26238401  | 26239437  | 11-Mar        | ENSMUSG000000022269 | 116   | 0.1  | 0.12 | 0.09 | 0.14 | 0.1  | 0.15 |
| chr15 | 102126570 | 102126931 | Espl1         | ENSMUSG000000058290 | 26    | 0.12 | 0.16 | 0.1  | 0.16 | 0.1  | 0.2  |
| chr15 | 5066067   | 5067062   | Rpl37         | ENSMUSG000000041841 | -49   | 0.09 | 0.11 | 0.1  | 0.19 | 0.1  | 0.15 |
| chr15 | 5135695   | 5135951   | Gm15938       | ENSMUSG000000087532 | -100  | 0.6  | 0.29 | 0.07 | 0.61 | 0.59 | 0.21 |
| chr15 | 6824085   | 6824520   | Osmr          | ENSMUSG000000022146 | -45   | 0.5  | NA   | 0.24 | 0.13 | 0.5  | 0.16 |
| chr15 | 9000771   | 9001734   | 1110020G09Rik | ENSMUSG000000022253 | 243   | 0.11 | 0.06 | 0.09 | 0.11 | 0.1  | 0.13 |
| chr15 | 10911525  | 10911828  | Amacr         | ENSMUSG000000022244 | 165   | 0.08 | 0.09 | 0.09 | 0.06 | 0.05 | 0.08 |
| chr15 | 10965649  | 10966166  | Rxfp3         | ENSMUSG000000060735 | 1816  | 1    | NA   | NA   | NA   | 1    | NA   |
| chr15 | 12251274  | 12252178  | Golph3        | ENSMUSG000000022200 | 336   | 0.17 | 0.4  | 0.11 | 0.16 | 0.17 | 0.12 |
| chr15 | 25344191  | 25344506  | Gm5468        | ENSMUSG000000056089 | 401   | 1    | 1    | 0.14 | 0.17 | 1    | NA   |
| chr15 | 25772793  | 25773328  | Fam134b       | ENSMUSG000000022270 | 41    | 0.15 | 0.09 | 0.08 | 0.14 | 0.14 | 0.11 |
| chr15 | 33617041  | 33617684  | Tspyl5        | ENSMUSG000000038984 | 276   | 0.56 | 0.56 | 0.27 | 0.41 | 0.57 | 0.22 |
| chr15 | 34767103  | 34767689  | Kcns2         | ENSMUSG000000050963 | 286   | 0.24 | 0.27 | 0.1  | 0.17 | 0.23 | 0.15 |
| chr15 | 35867394  | 35868012  | Cox6c         | ENSMUSG000000014313 | -303  | 0.09 | 0.12 | 0.11 | 0.15 | 0.09 | 0.2  |
| chr15 | 36094417  | 36094908  | Fbxo43        | ENSMUSG000000048230 | -23   | 0.08 | 0.09 | 0.08 | 0.17 | 0.09 | 0.16 |
| chr15 | 36212195  | 36213231  | Rnf19a        | ENSMUSG000000022280 | 189   | 0.18 | 0.15 | 0.09 | 0.18 | 0.18 | 0.11 |
| chr15 | 37721187  | 37721934  | Ncald         | ENSMUSG000000051359 | 195   | 0.15 | 0.15 | 0.13 | 0.16 | 0.13 | 0.19 |
| chr15 | 52543916  | 52544309  | Med30         | ENSMUSG000000038622 | 112   | 0.14 | 0.08 | 0.07 | 0.07 | 0.09 | 0.1  |
| chr15 | 53176503  | 53176767  | Ext1          | ENSMUSG000000061731 | 579   | 0.23 | 0.17 | 0.18 | 0.31 | 0.24 | 0.2  |
| chr15 | 55388765  | 55389404  | Mrpl13        | ENSMUSG000000022370 | -254  | 0.09 | 0.17 | 0.12 | 0.17 | 0.09 | 0.15 |
| chr15 | 57743662  | 57744054  | Wdr67         | ENSMUSG000000022364 | 104   | 0.1  | 0.11 | 0.08 | 0.12 | 0.1  | 0.11 |

|       |          |          |               |                    |      |      |      |      |      |      |      |
|-------|----------|----------|---------------|--------------------|------|------|------|------|------|------|------|
| chr15 | 68089882 | 68090728 | Zfat          | ENSMUSG00000022335 | 44   | 0.13 | 0.13 | 0.11 | 0.18 | 0.13 | 0.14 |
| chr15 | 72891349 | 72891554 | Trappc9       | ENSMUSG00000047921 | 7    | 0.09 | 0.14 | 0.09 | 0.1  | 0.09 | 0.09 |
| chr15 | 73252990 | 73253891 | Ptk2          | ENSMUSG00000022607 | 181  | 0.12 | 0.18 | 0.08 | 0.14 | 0.13 | 0.11 |
| chr15 | 75724377 | 75724793 | Naprt1        | ENSMUSG00000022574 | 326  | 1    | 0.61 | 0.41 | 0.64 | 1    | 1    |
| chr15 | 75799487 | 75799939 | Zfp707        | ENSMUSG00000034429 | 160  | 0.14 | 0.62 | 0.15 | 0.15 | 0.16 | 0.15 |
| chr15 | 76211187 | 76211526 | Heatr7a       | ENSMUSG00000022558 | 373  | 0.27 | 0.09 | 0.14 | 0.14 | 0.28 | 0.22 |
| chr15 | 76406721 | 76406981 | Adck5         | ENSMUSG00000022550 | 63   | 0.11 | 0.23 | 0.1  | 0.15 | 0.14 | 0.1  |
| chr15 | 76734436 | 76735101 | Rpl8          | ENSMUSG00000003970 | 267  | 0.07 | NA   | 0.21 | 0.11 | 0.06 | 0.22 |
| chr15 | 77786141 | 77787265 | Foxred2       | ENSMUSG00000016552 | 402  | 0.19 | 0.13 | 0.11 | 0.17 | 0.2  | 0.18 |
| chr15 | 77950027 | 77950615 | A730060N03Rik | ENSMUSG00000092375 | 185  | 0.09 | 0.08 | 0.09 | 0.12 | 0.09 | 0.14 |
| chr15 | 78236056 | 78236292 | Tst           | ENSMUSG00000044986 | 89   | 0.2  | 0.2  | 0.08 | 0.16 | 0.25 | 0.22 |
| chr15 | 78236745 | 78237120 | Mpst          | ENSMUSG00000071711 | -210 | 0.8  | 1    | 0.43 | NA   | 0.78 | 0.29 |
| chr15 | 78549035 | 78549308 | Elfn2         | ENSMUSG00000043460 | -628 | 0.07 | 0.06 | 0.07 | 0.15 | 0.06 | 0.13 |
| chr15 | 78729887 | 78730445 | Sh3bp1        | ENSMUSG00000022436 | 69   | 0.08 | 0.07 | 0.09 | 0.15 | 0.09 | 0.11 |
| chr15 | 78993678 | 78994381 | Sox10         | ENSMUSG00000033006 | 887  | 0.36 | 0.33 | 0.12 | 0.13 | 0.36 | 0.31 |
| chr15 | 79091502 | 79092452 | Baiap2l2      | ENSMUSG00000018126 | -250 | 0.12 | 0.1  | 0.06 | 0.11 | 0.09 | 0.1  |
| chr15 | 79335578 | 79336575 | Kcnj4         | ENSMUSG00000044216 | -405 | 0.1  | 0.19 | 0.09 | 0.13 | 0.1  | 0.15 |
| chr15 | 80064306 | 80064851 | Smcr7l        | ENSMUSG00000022412 | 68   | 0.13 | 0.14 | 0.1  | 0.19 | 0.12 | 0.12 |
| chr15 | 81191000 | 81191376 | Slc25a17      | ENSMUSG00000022404 | 7    | 0.29 | 0.17 | 0.11 | 0.14 | 0.3  | 0.2  |
| chr15 | 81559715 | 81560640 | Rangap1       | ENSMUSG00000022391 | 92   | 0.22 | 0.14 | 0.14 | 0.12 | 0.29 | 0.15 |
| chr15 | 81688215 | 81688983 | Tob2          | ENSMUSG00000048546 | 157  | 0.22 | 0.5  | 0.19 | 0.26 | 0.22 | 0.34 |
| chr15 | 81702746 | 81703192 | Aco2          | ENSMUSG00000022477 | 55   | 0.2  | 0.41 | 0.1  | 0.18 | 0.12 | 0.14 |
| chr15 | 81846327 | 81847009 | Pppde2        | ENSMUSG00000022472 | -227 | 0.12 | 0.09 | 0.1  | 0.14 | 0.12 | 0.16 |
| chr15 | 83081513 | 83082258 | A4galt        | ENSMUSG00000047878 | 276  | 0.1  | 0.1  | 0.1  | 0.12 | 0.1  | 0.13 |
| chr15 | 83998187 | 83998721 | Pnpla3        | ENSMUSG00000041653 | 208  | 0.25 | 0.07 | 0.15 | 0.21 | 0.24 | 0.18 |
| chr15 | 84276447 | 84276829 | 1810041L15Rik | ENSMUSG00000062760 | 889  | 0.33 | 0.42 | 0.14 | 0.22 | 0.5  | 0.19 |
| chr15 | 84867229 | 84867713 | Fam118a       | ENSMUSG00000022434 | -21  | 0.12 | 0.58 | 0.15 | 0.45 | 0.15 | 0.16 |
| chr15 | 85641579 | 85642385 | 2210021J22Rik | ENSMUSG00000064284 | 92   | 0.19 | 0.12 | 0.13 | 0.21 | 0.22 | 0.15 |
| chr15 | 85662659 | 85662904 | Ttc38         | ENSMUSG00000035944 | 47   | 0.24 | 0.13 | 0.12 | 0.17 | 0.25 | 0.14 |
| chr15 | 88958886 | 88959212 | Hdac10        | ENSMUSG00000062906 | 32   | 0.19 | 0.17 | 0.12 | 0.28 | 0.16 | 0.18 |

|       |           |           |               |                    |      |      |      |      |      |      |      |
|-------|-----------|-----------|---------------|--------------------|------|------|------|------|------|------|------|
| chr15 | 89003478  | 89004130  | Plxnb2        | ENSMUSG00000036606 | 476  | 0.5  | 0.27 | 0.17 | 0.16 | 0.3  | 0.09 |
| chr15 | 89240479  | 89240817  | Syce3         | ENSMUSG00000078938 | 46   | 1    | 1    | 0.95 | 0.88 | 0.95 | 1    |
| chr15 | 92227353  | 92227931  | Pdzrn4        | ENSMUSG00000036218 | 296  | 0.13 | 0.07 | 0.09 | 0.16 | 0.14 | 0.11 |
| chr15 | 96529167  | 96530421  | Slc38a2       | ENSMUSG00000022462 | 335  | 0.35 | 0.3  | 0.14 | 0.17 | 0.34 | 0.13 |
| chr15 | 97832321  | 97832715  | Col2a1        | ENSMUSG00000022483 | -200 | 0.11 | 0.07 | 0.12 | 0.14 | 0.11 | 0.13 |
| chr15 | 97975630  | 97976274  | Asb8          | ENSMUSG00000048175 | 138  | 0.2  | 0.1  | 0.15 | 0.2  | 0.2  | 0.14 |
| chr15 | 98267921  | 98268165  | Olfrc282      | ENSMUSG00000063780 | 142  | 0.89 | 1    | 0.4  | NA   | 1    | 0.92 |
| chr15 | 98711506  | 98711902  | Rhebl1        | ENSMUSG00000023755 | -183 | 1    | NA   | 0.1  | 0.12 | 1    | 0.2  |
| chr15 | 98924053  | 98924390  | Dnajc22       | ENSMUSG00000038009 | 620  | 0.21 | 1    | 0.07 | 0.13 | 0.2  | 0.21 |
| chr15 | 99556059  | 99556556  | 2310016M24Rik | ENSMUSG00000023020 | 258  | 0.08 | NA   | 0.11 | 0.2  | 0.09 | 0.17 |
| chr15 | 99602281  | 99603122  | Lass5         | ENSMUSG00000023021 | -178 | 0.17 | 0.27 | 0.14 | 0.17 | 0.18 | 0.15 |
| chr15 | 99705673  | 99706007  | Lima1         | ENSMUSG00000023022 | 7    | 0.5  | 0.36 | 0.14 | 0.13 | 0.48 | 0.21 |
| chr15 | 99868968  | 99869760  | Dip2b         | ENSMUSG00000023026 | 269  | 0.09 | 0.12 | 0.09 | 0.11 | 0.09 | 0.12 |
| chr15 | 100111282 | 100111505 | Tmprss12      | ENSMUSG00000045631 | 125  | 1    | 1    | 0.75 | NA   | 1    | 1    |
| chr15 | 100466938 | 100467565 | Smagp         | ENSMUSG00000053559 | 35   | 0.14 | 0.25 | 0.12 | 0.14 | 0.14 | 0.16 |
| chr15 | 101054521 | 101055211 | A330009N23Rik | ENSMUSG00000087511 | -314 | 0.12 | 0.17 | 0.08 | 0.17 | 0.13 | 0.1  |
| chr15 | 101904031 | 101905062 | Eif4b         | ENSMUSG00000058655 | 342  | 0.08 | 1    | 0.08 | 0.19 | 0.07 | 0.11 |
| chr15 | 102087573 | 102087908 | Rarg          | ENSMUSG00000001288 | 40   | 0.17 | 0.25 | 0.21 | 0.27 | 0.17 | 0.24 |
| chr15 | 102502296 | 102502884 | Mir688        | ENSMUSG00000076009 | -293 | 0.5  | 0.3  | 0.12 | 0.23 | 0.24 | 0.13 |
| chr15 | 102977190 | 102977581 | D930007P13Rik | ENSMUSG00000086435 | -126 | 0.08 | 0.08 | 0.11 | 0.04 | 0.07 | 0.06 |
| chr15 | 3533001   | 3533525   | Ghr           | ENSMUSG00000055737 | -76  | NA   | 1    | NA   | NA   | NA   | 0.11 |
| chr15 | 8118930   | 8119448   | 2410089E03Rik | ENSMUSG00000039801 | 83   | 0.37 | NA   | 0.28 | 0.11 | NA   | 0.21 |
| chr15 | 10966781  | 10967216  | Rxfp3         | ENSMUSG00000060735 | 725  | NA   | NA   | 0.14 | 0.09 | NA   | 0.5  |
| chr15 | 27610944  | 27611534  | Fam105a       | ENSMUSG00000056069 | 1    | NA   | 0.37 | 0.08 | 0.12 | 0.18 | 0.15 |
| chr15 | 32850601  | 32850891  | Sdc2          | ENSMUSG00000022261 | 217  | NA   | NA   | 0.14 | 0.1  | 0.27 | 0.19 |
| chr15 | 38908313  | 38908643  | Cthrc1        | ENSMUSG00000054196 | 0    | 0.14 | NA   | 0.19 | 0.42 | NA   | 0.07 |
| chr15 | 43113802  | 43114370  | Eif3e         | ENSMUSG00000022336 | 196  | NA   | 0.8  | 0.09 | 0.22 | 0.28 | 0.15 |
| chr15 | 44945815  | 44946423  | Kcnv1         | ENSMUSG00000022342 | 361  | NA   | NA   | 0.33 | NA   | NA   | 1    |
| chr15 | 50721460  | 50721690  | Trps1         | ENSMUSG00000038679 | 12   | 0.5  | NA   | 0.25 | 0.5  | NA   | NA   |
| chr15 | 53733995  | 53734204  | Samd12        | ENSMUSG00000058656 | -14  | 1    | 0.75 | NA   | NA   | NA   | NA   |

|       |          |          |          |                    |      |      |      |      |      |      |      |
|-------|----------|----------|----------|--------------------|------|------|------|------|------|------|------|
| chr15 | 57525666 | 57525947 | Zhx2     | ENSMUSG00000071757 | -414 | NA   | 1    | 0.11 | 1    | 0.2  | 0.32 |
| chr15 | 73640145 | 73640358 | Gm3244   | ENSMUSG00000083380 | 75   | 1    | NA   | 1    | 1    | NA   | 1    |
| chr15 | 74630128 | 74630383 | Ly6k     | ENSMUSG00000044678 | 161  | 1    | 1    | 0.46 | NA   | NA   | 0.73 |
| chr15 | 74785867 | 74786280 | Ly6e     | ENSMUSG00000022587 | 26   | NA   | 0.12 | 0.09 | 0.2  | 0.5  | 0.11 |
| chr15 | 75534411 | 75534970 | Rhpn1    | ENSMUSG00000022580 | -20  | NA   | NA   | 0.23 | 0.2  | NA   | 0.33 |
| chr15 | 75920695 | 75921089 | Nrbp2    | ENSMUSG00000075590 | -449 | 1    | NA   | NA   | NA   | NA   | NA   |
| chr15 | 76028396 | 76028764 | Plec     | ENSMUSG00000022565 | 59   | NA   | 0.1  | 0.11 | 0.24 | NA   | 0.17 |
| chr15 | 76162270 | 76162546 | Gpaa1    | ENSMUSG00000022561 | -21  | NA   | 0.88 | 0.11 | 0.29 | 1    | 0.14 |
| chr15 | 76470207 | 76470457 | Tonsl    | ENSMUSG00000059323 | -62  | NA   | NA   | 0.07 | 0.15 | NA   | 0.05 |
| chr15 | 76490115 | 76490335 | Cyhr1    | ENSMUSG00000053929 | 266  | NA   | NA   | 0.11 | 0.33 | NA   | 0.27 |
| chr15 | 78004707 | 78004931 | Iff27    | ENSMUSG00000016637 | -281 | 0.33 | NA   | NA   | 0.5  | NA   | 0.38 |
| chr15 | 78778165 | 78778443 | Triobp   | ENSMUSG00000033088 | 150  | NA   | NA   | 0.22 | 0.06 | NA   | 0.15 |
| chr15 | 78860974 | 78861546 | Gcat     | ENSMUSG00000006378 | -44  | NA   | NA   | 0.22 | 0.25 | NA   | 0.28 |
| chr15 | 79913589 | 79914015 | Rpl3     | ENSMUSG00000060036 | 34   | NA   | 0.25 | 0.22 | 0.22 | 0.06 | 0.26 |
| chr15 | 80094335 | 80094888 | Rps19bp1 | ENSMUSG00000051518 | 125  | NA   | 0.3  | 0.14 | 0.16 | 0.12 | 0.13 |
| chr15 | 80808157 | 80808681 | Sgsm3    | ENSMUSG00000042303 | 224  | NA   | 0.13 | 0.11 | 0.36 | 0.2  | 0.13 |
| chr15 | 81494713 | 81494955 | L3mbtl2  | ENSMUSG00000022394 | 403  | 0.25 | NA   | 0.1  | 0.14 | NA   | 0.27 |
| chr15 | 81641031 | 81642201 | Tef      | ENSMUSG00000022389 | 140  | NA   | NA   | 0.09 | 0.16 | NA   | 0.11 |
| chr15 | 81690074 | 81690307 | Tob2     | ENSMUSG00000078960 | -964 | NA   | NA   | 0.13 | 0.16 | 1    | 0.16 |
| chr15 | 81958083 | 81958778 | Ccdc134  | ENSMUSG00000068114 | 78   | NA   | 0.27 | 0.11 | 0.21 | 0.55 | 0.13 |
| chr15 | 82105373 | 82105646 | 3-Sep    | ENSMUSG00000022456 | 144  | NA   | 0.2  | 0.16 | 0.14 | 0.08 | 0.32 |
| chr15 | 82169184 | 82169509 | Naga     | ENSMUSG00000022453 | -90  | NA   | NA   | 0.2  | NA   | NA   | 0.25 |
| chr15 | 82184353 | 82185105 | Ndufa6   | ENSMUSG00000022450 | -8   | NA   | 0.26 | 0.14 | 0.21 | 0.53 | 0.14 |
| chr15 | 83341246 | 83341464 | Ttll1    | ENSMUSG00000022442 | -51  | NA   | 1    | 0.09 | 0.33 | NA   | 0.16 |
| chr15 | 85709426 | 85709883 | Trmu     | ENSMUSG00000022386 | -88  | 0.5  | 1    | 0.1  | 0.1  | NA   | 0.11 |
| chr15 | 88784878 | 88785433 | Ttll8    | ENSMUSG00000022388 | -307 | 1    | NA   | NA   | NA   | NA   | NA   |
| chr15 | 88890525 | 88890853 | Panx2    | ENSMUSG00000058441 | 512  | NA   | NA   | 0.07 | NA   | NA   | NA   |
| chr15 | 88906664 | 88906889 | Trabd    | ENSMUSG00000015363 | 222  | NA   | 0.4  | 0.09 | 0.08 | 0.06 | 0.11 |
| chr15 | 90054540 | 90055070 | Alg10b   | ENSMUSG00000075470 | 63   | NA   | 1    | 0.26 | 0.29 | 1    | 0.18 |
| chr15 | 98087263 | 98087497 | H1fnt    | ENSMUSG00000048077 | 358  | 0.89 | NA   | 0.49 | NA   | NA   | 0.89 |

|       |           |           |          |                    |       |      |      |      |      |      |      |
|-------|-----------|-----------|----------|--------------------|-------|------|------|------|------|------|------|
| chr15 | 98507588  | 98507913  | Rnd1     | ENSMUSG00000054855 | 139   | NA   | NA   | 0.06 | NA   | NA   | 0.09 |
| chr15 | 98608509  | 98608726  | Wnt10b   | ENSMUSG00000022996 | -36   | NA   | 0.16 | 0.12 | 0.31 | 0.12 | 0.15 |
| chr15 | 98836545  | 98836763  | Gm8973   | ENSMUSG00000064081 | 167   | NA   | 1    | 0.96 | 0.89 | NA   | 0.92 |
| chr15 | 101268972 | 101269452 | Krt83    | ENSMUSG00000047641 | 23    | NA   | NA   | 0.08 | 0.31 | 0.25 | 0.13 |
| chr15 | 102162098 | 102162459 | Myg1     | ENSMUSG00000001285 | 138   | NA   | NA   | 0.11 | 0.09 | 0.19 | 0.44 |
| chr15 | 102340935 | 102341354 | Map3k12  | ENSMUSG00000023050 | -13   | NA   | 1    | 0.25 | 1    | 0.25 | 0.18 |
| chr15 | 102348491 | 102349100 | Tarbp2   | ENSMUSG00000023051 | 172   | NA   | 0.29 | 0.32 | 0.34 | 0.25 | 0.56 |
| chr15 | 102765375 | 102765657 | Hoxc12   | ENSMUSG00000050328 | -1672 | NA   | 0.29 | 0.09 | 0.29 | 0.67 | 0.29 |
| chr15 | 102767265 | 102767887 | Hoxc12   | ENSMUSG00000050328 | 388   | 1    | NA   | 0.24 | 0.25 | NA   | 0.36 |
| chr15 | 102796932 | 102797144 | Hoxc10   | ENSMUSG00000022484 | -189  | NA   | 0.25 | 0.09 | 0.16 | 0.07 | 0.05 |
| chr15 | 102797735 | 102798093 | Gm20398  | ENSMUSG00000092585 | 40    | NA   | NA   | 0.1  | 0.14 | 0.25 | 0.28 |
| chr15 | 103069808 | 103071151 | Cbx5     | ENSMUSG00000009575 | -232  | NA   | NA   | NA   | NA   | NA   | 1    |
| chr15 | 103333221 | 103333545 | Pde1b    | ENSMUSG00000022489 | -82   | NA   | NA   | 0.15 | 0.11 | NA   | 0.16 |
| chr16 | 52452377  | 52453438  | Alcam    | ENSMUSG00000022636 | -329  | 0.62 | 0.5  | 0.12 | 0.2  | 0.06 | 0.2  |
| chr16 | 44173116  | 44173877  | Gm608    | ENSMUSG00000068284 | 137   | 0.5  | 0.23 | 0.12 | 0.13 | 0.14 | 0.11 |
| chr16 | 50431581  | 50432593  | Bbx      | ENSMUSG00000022641 | 335   | 0.19 | 0.1  | 0.1  | 0.13 | 0.07 | 0.15 |
| chr16 | 90810375  | 90810744  | Urb1     | ENSMUSG00000039929 | 67    | 0.43 | 0.14 | 0.14 | 0.11 | 0.12 | 0.18 |
| chr16 | 20240911  | 20241470  | Map6d1   | ENSMUSG00000041205 | 241   | 0.32 | 0.28 | 0.1  | 0.14 | 0.11 | 0.16 |
| chr16 | 34573751  | 34574175  | Kalrn    | ENSMUSG00000061751 | -345  | 0.22 | 0.18 | 0.08 | 0.14 | 0.06 | 0.11 |
| chr16 | 72663324  | 72664043  | Robo1    | ENSMUSG00000022883 | 289   | 0.48 | 0.2  | 0.11 | 0.23 | 0.19 | 0.16 |
| chr16 | 10545343  | 10545843  | Clec16a  | ENSMUSG00000068663 | 136   | 0.4  | 0.08 | 0.13 | 0.13 | 0.05 | 0.18 |
| chr16 | 5203452   | 5204113   | Nagpa    | ENSMUSG00000023143 | -212  | 0.23 | 0.13 | 0.08 | 0.1  | 0.06 | 0.13 |
| chr16 | 32002944  | 32003353  | Senp5    | ENSMUSG00000022772 | 116   | 0.25 | 0.11 | 0.08 | 0.12 | 0.07 | 0.21 |
| chr16 | 38452547  | 38453065  | Adprh    | ENSMUSG00000002844 | -37   | 0.5  | 0.18 | 0.15 | 0.18 | 0.14 | 0.13 |
| chr16 | 64851044  | 64852763  | Cggbp1   | ENSMUSG00000054604 | 81    | 0.24 | 0.22 | 0.13 | 0.17 | 0.13 | 0.19 |
| chr16 | 17927412  | 17928726  | Sic25a1  | ENSMUSG00000003528 | -633  | 0.23 | 0.2  | 0.1  | 0.16 | 0.12 | 0.14 |
| chr16 | 90385978  | 90387215  | Hunk     | ENSMUSG00000053414 | -46   | 0.33 | 0.21 | 0.1  | 0.15 | 0.15 | 0.18 |
| chr16 | 38712813  | 38713466  | Arhgap31 | ENSMUSG00000022799 | -128  | 0.53 | 0.42 | 0.11 | 0.14 | 0.12 | 0.16 |
| chr16 | 18288868  | 18289613  | Dgcr8    | ENSMUSG00000022718 | 23    | 0.15 | 0.18 | 0.14 | 0.22 | 0.06 | 0.17 |
| chr16 | 44745964  | 44746317  | Gtpbp8   | ENSMUSG00000022668 | 256   | 0.48 | 0.17 | 0.13 | 0.2  | 0.12 | 0.13 |

|       |          |          |               |                    |      |      |      |      |      |      |      |
|-------|----------|----------|---------------|--------------------|------|------|------|------|------|------|------|
| chr16 | 96303259 | 96304333 | Brwd1         | ENSMUSG00000022914 | 239  | 0.39 | 0.1  | 0.13 | 0.16 | 0.14 | 0.14 |
| chr16 | 35871110 | 35871474 | Parp14        | ENSMUSG00000034422 | 176  | 1    | 0.14 | 0.14 | 0.15 | 0.1  | 0.22 |
| chr16 | 5049454  | 5050875  | Glyr1         | ENSMUSG00000022536 | -161 | 0.19 | 0.14 | 0.11 | 0.13 | 0.1  | 0.17 |
| chr16 | 28928901 | 28930273 | 1600021P15Rik | ENSMUSG00000051065 | 197  | 0.31 | 0.24 | 0.12 | 0.24 | 0.12 | 0.21 |
| chr16 | 17914300 | 17915270 | Gsc2          | ENSMUSG00000022738 | 367  | 0.27 | 0.13 | 0.11 | 0.19 | 0.1  | 0.17 |
| chr16 | 43979443 | 43980249 | Zdhhc23       | ENSMUSG00000036304 | -640 | 0.1  | 0.26 | 0.15 | 0.2  | 0.22 | 0.15 |
| chr16 | 32914057 | 32914759 | Lrch3         | ENSMUSG00000022801 | 222  | 0.25 | 0.24 | 0.09 | 0.17 | 0.11 | 0.1  |
| chr16 | 59471542 | 59471947 | Mina          | ENSMUSG00000022724 | 143  | 0.39 | 0.33 | 0.14 | 0.17 | 0.15 | 0.13 |
| chr16 | 77013754 | 77014565 | Usp25         | ENSMUSG00000022867 | -155 | 0.13 | 0.18 | 0.11 | 0.12 | 0.07 | 0.07 |
| chr16 | 92058221 | 92059199 | Mrps6         | ENSMUSG00000039680 | 195  | 0.28 | 0.14 | 0.11 | 0.15 | 0.13 | 0.15 |
| chr16 | 35022317 | 35023101 | Ptplb         | ENSMUSG00000035376 | 202  | 0.68 | 0.58 | 0.15 | 0.17 | 0.29 | 0.19 |
| chr16 | 33684414 | 33685024 | Heg1          | ENSMUSG00000075254 | 167  | 0.48 | 0.3  | 0.09 | 0.17 | 0.22 | 0.15 |
| chr16 | 97578136 | 97578595 | Bace2         | ENSMUSG00000040605 | 30   | 0.95 | 0.57 | 0.22 | 0.2  | 0.46 | 0.22 |
| chr16 | 84735450 | 84736064 | Mrpl39        | ENSMUSG00000022889 | -282 | 0.17 | 0.05 | 0.09 | 0.12 | 0.05 | 0.2  |
| chr16 | 8737801  | 8739354  | AC156026.1    | ENSMUSG00000093050 | 163  | 0.19 | 0.17 | 0.08 | 0.14 | 0.12 | 0.13 |
| chr16 | 70314207 | 70314807 | Gbe1          | ENSMUSG00000022707 | 199  | 0.26 | 0.17 | 0.09 | 0.15 | 0.11 | 0.14 |
| chr16 | 35363548 | 35364106 | Sec22a        | ENSMUSG00000034473 | 74   | 0.19 | 0.08 | 0.1  | 0.14 | 0.08 | 0.12 |
| chr16 | 5013305  | 5013874  | Rogdi         | ENSMUSG00000022540 | 31   | 0.35 | 0.41 | 0.15 | 0.16 | 0.12 | 0.17 |
| chr16 | 76372527 | 76373748 | Nrip1         | ENSMUSG00000048490 | 145  | 0.15 | 0.17 | 0.08 | 0.16 | 0.09 | 0.13 |
| chr16 | 20535490 | 20535941 | Ap2m1         | ENSMUSG00000022841 | 164  | 0.71 | 1    | 0.11 | 0.15 | 0.16 | 0.21 |
| chr16 | 58408342 | 58409235 | 4930461C15Rik | ENSMUSG00000086827 | -399 | 0.17 | 0.19 | 0.1  | 0.14 | 0.09 | 0.13 |
| chr16 | 4594011  | 4595147  | Glis2         | ENSMUSG00000014303 | -134 | 0.13 | 0.15 | 0.1  | 0.17 | 0.06 | 0.14 |
| chr16 | 8829431  | 8831325  | 1810013L24Rik | ENSMUSG00000022507 | 185  | 0.24 | 0.14 | 0.1  | 0.17 | 0.15 | 0.15 |
| chr16 | 20693296 | 20693711 | Fam131a       | ENSMUSG00000050821 | 148  | 1    | 0.11 | 0.11 | 0.12 | 0.1  | 0.1  |
| chr16 | 33185049 | 33185653 | Osbpl11       | ENSMUSG00000022807 | 194  | 0.12 | 0.14 | 0.08 | 0.11 | 0.07 | 0.14 |
| chr16 | 94790567 | 94792695 | Dyrk1a        | ENSMUSG00000022897 | 14   | 0.14 | 0.17 | 0.11 | 0.14 | 0.09 | 0.1  |
| chr16 | 18398189 | 18398405 | Arvcf         | ENSMUSG00000000325 | 480  | 0.58 | 1    | 0.88 | 0.93 | 0.93 | 0.93 |
| chr16 | 78376192 | 78377344 | Btg3          | ENSMUSG00000022863 | 287  | 0.18 | 0.14 | 0.12 | 0.17 | 0.12 | 0.15 |
| chr16 | 11066067 | 11067170 | Litaf         | ENSMUSG00000022500 | -368 | 0.3  | 0.16 | 0.09 | 0.18 | 0.12 | 0.17 |
| chr16 | 90727176 | 90727772 | 2610039C10Rik | ENSMUSG00000022978 | -90  | 0.29 | 0.36 | 0.22 | 0.16 | 0.15 | 0.15 |

|       |          |          |               |                    |      |      |      |      |      |      |      |
|-------|----------|----------|---------------|--------------------|------|------|------|------|------|------|------|
| chr16 | 35490293 | 35491079 | Pdia5         | ENSMUSG00000022844 | 273  | 0.08 | 0.07 | 0.1  | 0.13 | 0.05 | 0.14 |
| chr16 | 15886803 | 15888328 | Cebpd         | ENSMUSG00000071637 | 186  | 0.14 | 0.14 | 0.11 | 0.14 | 0.08 | 0.13 |
| chr16 | 17722728 | 17723035 | Med15         | ENSMUSG00000012114 | 142  | 0.12 | 0.14 | 0.09 | 0.16 | 0.24 | 0.16 |
| chr16 | 18392611 | 18393084 | Arvcf         | ENSMUSG00000000325 | 166  | 0.06 | 0.17 | 0.06 | 0.11 | 0.3  | 0.09 |
| chr16 | 87455154 | 87455866 | Usp16         | ENSMUSG00000025616 | 286  | 0.06 | 0.18 | 0.12 | 0.13 | 0.12 | 0.15 |
| chr16 | 4639960  | 4640359  | Vasn          | ENSMUSG00000039646 | 191  | 0.12 | 1    | 0.54 | 0.58 | 1    | 0.72 |
| chr16 | 14163148 | 14163780 | Nde1          | ENSMUSG00000022678 | 96   | 0.13 | 0.12 | 0.11 | 0.22 | 0.24 | 0.2  |
| chr16 | 15637154 | 15638200 | Mcm4          | ENSMUSG00000022673 | -184 | 0.29 | 0.15 | 0.14 | 0.13 | 0.13 | 0.18 |
| chr16 | 21694214 | 21695086 | 2510009E07Rik | ENSMUSG00000043391 | 32   | 0.23 | 0.06 | 0.11 | 0.13 | 0.1  | 0.11 |
| chr16 | 8637346  | 8638128  | Pmm2          | ENSMUSG00000022711 | -30  | 0.15 | 0.14 | 0.09 | 0.13 | 0.08 | 0.12 |
| chr16 | 18426328 | 18426754 | Comt          | ENSMUSG00000000326 | -63  | 0.33 | 0.06 | 0.1  | 0.16 | 0.1  | 0.08 |
| chr16 | 27388869 | 27389349 | Ccdc50        | ENSMUSG00000038127 | 154  | 1    | 0.86 | 0.11 | 0.2  | 0.43 | 0.2  |
| chr16 | 16146705 | 16147039 | 2310008H04Rik | ENSMUSG00000041974 | 72   | 0.24 | 0.19 | 0.09 | 0.14 | 0.09 | 0.15 |
| chr16 | 55973770 | 55974810 | Rpl24         | ENSMUSG00000022601 | 373  | 0.19 | 0.14 | 0.12 | 0.13 | 0.13 | 0.17 |
| chr16 | 55895132 | 55895542 | Fam55c        | ENSMUSG00000075033 | 55   | 0.16 | 0.09 | 0.09 | 0.12 | 0.08 | 0.08 |
| chr16 | 17911201 | 17911434 | Dgcr14        | ENSMUSG00000003527 | 124  | 0.39 | 0.11 | 0.12 | 0.19 | 0.16 | 0.12 |
| chr16 | 18498759 | 18499420 | Gnb1l         | ENSMUSG00000000884 | 228  | 0.21 | 0.11 | 0.1  | 0.14 | 0.04 | 0.14 |
| chr16 | 67620378 | 67620946 | Cadm2         | ENSMUSG00000064115 | 76   | 0.35 | 0.51 | 0.15 | 0.33 | 0.2  | 0.2  |
| chr16 | 90220656 | 90221544 | Sod1          | ENSMUSG00000022982 | 113  | 0.29 | 0.22 | 0.11 | 0.29 | 0.18 | 0.17 |
| chr16 | 20629819 | 20630112 | Ece2          | ENSMUSG00000022842 | 64   | 0.08 | NA   | 0.08 | 0.15 | 0.33 | 0.18 |
| chr16 | 30283158 | 30283423 | Lrrc15        | ENSMUSG00000052316 | 50   | 0.15 | 0.11 | 0.28 | 0.2  | 0.37 | 0.17 |
| chr16 | 34690616 | 34691105 | Ccdc14        | ENSMUSG00000022833 | 158  | 0.44 | NA   | 0.16 | 0.24 | 0.1  | 0.23 |
| chr16 | 26968024 | 26968385 | Gm606         | ENSMUSG00000068428 | 127  | 1    | 0.15 | 0.24 | 0.11 | 0.36 | 0.19 |
| chr16 | 91646976 | 91648738 | Gart          | ENSMUSG00000022962 | -677 | 0.4  | 0.49 | 0.16 | 0.24 | 0.19 | 0.18 |
| chr16 | 11909185 | 11909500 | Cpped1        | ENSMUSG00000065979 | 147  | 0.75 | 0.45 | 0.16 | 0.46 | 0.28 | 0.15 |
| chr16 | 33251440 | 33252053 | Snx4          | ENSMUSG00000022808 | 204  | 0.11 | 0.07 | 0.07 | 0.15 | 0.06 | 0.13 |
| chr16 | 91485180 | 91485782 | Ifnar1        | ENSMUSG00000022967 | -2   | 0.2  | 0.13 | 0.12 | 0.18 | 0.09 | 0.13 |
| chr16 | 17276317 | 17278252 | Tmem191c      | ENSMUSG00000055692 | 891  | 0.14 | 0.11 | 0.13 | 0.11 | 0.09 | 0.17 |
| chr16 | 17508909 | 17509316 | Lztr1         | ENSMUSG00000022761 | 51   | 0.15 | 0.13 | 0.1  | 0.14 | 0.07 | 0.11 |
| chr16 | 24393364 | 24394159 | Lpp           | ENSMUSG00000033306 | 325  | 0.28 | 0.25 | 0.09 | 0.2  | 0.19 | 0.16 |



|       |          |          |               |                    |       |      |      |      |      |      |      |
|-------|----------|----------|---------------|--------------------|-------|------|------|------|------|------|------|
| chr16 | 30599702 | 30601424 | Fam43a        | ENSMUSG00000046546 | 754   | 0.14 | 0.16 | 0.11 | 0.12 | 0.09 | 0.14 |
| chr16 | 38550032 | 38550384 | Poglut1       | ENSMUSG00000034064 | 96    | 0.23 | 0.22 | 0.17 | 0.15 | 0.07 | 0.13 |
| chr16 | 94083717 | 94086372 | Sim2          | ENSMUSG00000062713 | -1017 | 0.14 | 0.16 | 0.12 | 0.15 | 0.09 | 0.17 |
| chr16 | 18591765 | 18592051 | 4930588K23Rik | ENSMUSG00000075335 | -177  | 0.13 | 0.34 | 0.15 | 0.18 | 0.05 | 0.19 |
| chr16 | 78301906 | 78302617 | Cxadr         | ENSMUSG00000022865 | 260   | 0.17 | 0.11 | 0.1  | 0.14 | 0.06 | 0.14 |
| chr16 | 20672626 | 20673579 | Eif4g1        | ENSMUSG00000045983 | 306   | 0.13 | 0.19 | 0.09 | 0.16 | 0.08 | 0.15 |
| chr16 | 11983856 | 11985083 | Shisa9        | ENSMUSG00000022494 | -205  | 0.18 | 0.2  | 0.13 | 0.13 | 0.1  | 0.17 |
| chr16 | 16599737 | 16600247 | Fgd4          | ENSMUSG00000022788 | 79    | 0.67 | 0.26 | 0.1  | 0.17 | 0.17 | 0.11 |
| chr16 | 90142647 | 90144592 | Tiam1         | ENSMUSG00000002489 | 395   | 0.21 | 0.19 | 0.15 | 0.24 | 0.13 | 0.2  |
| chr16 | 4541728  | 4541980  | Srl           | ENSMUSG00000022519 | -38   | 0.15 | 0.17 | 0.13 | 0.21 | 0.09 | 0.11 |
| chr16 | 37539403 | 37540148 | Gtf2e1        | ENSMUSG00000022828 | 87    | 0.15 | 0.16 | 0.14 | 0.2  | 0.09 | 0.18 |
| chr16 | 85899730 | 85901347 | Adamts5       | ENSMUSG00000022894 | 832   | 0.33 | 0.21 | 0.24 | 0.29 | 0.19 | 0.18 |
| chr16 | 18343856 | 18344174 | D16H22S680E   | ENSMUSG00000013539 | -20   | 0.23 | 0.09 | 0.08 | 0.15 | 0.06 | 0.07 |
| chr16 | 4003534  | 4003987  | Slx4          | ENSMUSG00000039738 | -8    | 0.47 | 0.41 | 0.24 | 0.35 | 0.26 | 0.21 |
| chr16 | 13667998 | 13668311 | Parn          | ENSMUSG00000022685 | 109   | 0.12 | 0.14 | 0.07 | 0.18 | 0.06 | 0.14 |
| chr16 | 93883734 | 93884662 | Chaf1b        | ENSMUSG00000022945 | 52    | 0.21 | 0.16 | 0.1  | 0.15 | 0.11 | 0.14 |
| chr16 | 91406440 | 91406836 | Il10rb        | ENSMUSG00000022969 | 158   | 0.19 | 0.17 | 0.13 | 0.16 | 0.04 | 0.15 |
| chr16 | 4679542  | 4679826  | Coro7         | ENSMUSG00000039637 | -6    | 1    | 0.22 | 0.54 | 0.55 | 0.09 | 0.31 |
| chr16 | 35541392 | 35542775 | Sema5b        | ENSMUSG00000052133 | 635   | 0.07 | 0.05 | 0.1  | 0.1  | 0.12 | 0.14 |
| chr16 | 38088322 | 38089874 | Gsk3b         | ENSMUSG00000022812 | 11    | 0.22 | 0.14 | 0.1  | 0.15 | 0.11 | 0.17 |
| chr16 | 18812336 | 18812740 | Ufd1l         | ENSMUSG00000005262 | 151   | 0.31 | NA   | 0.08 | 0.12 | 0.11 | 0.16 |
| chr16 | 22265359 | 22266271 | Tra2b         | ENSMUSG00000022858 | 87    | 0.16 | 0.19 | 0.11 | 0.18 | 0.1  | 0.12 |
| chr16 | 42875087 | 42876512 | 4932412D23Rik | ENSMUSG00000075070 | -99   | 0.19 | 0.11 | 0.18 | 0.16 | 0.1  | 0.08 |
| chr16 | 4939045  | 4939501  | Nudt16l1      | ENSMUSG00000022516 | 162   | 0.06 | 0.05 | 0.06 | 0.23 | 0.16 | 0.17 |
| chr16 | 22009257 | 22010090 | Senp2         | ENSMUSG00000022855 | 116   | 0.22 | 0.09 | 0.09 | 0.17 | 0.12 | 0.11 |
| chr16 | 91729650 | 91730403 | Itsn1         | ENSMUSG00000022957 | 315   | 0.15 | 0.17 | 0.07 | 0.12 | 0.07 | 0.12 |
| chr16 | 93711809 | 93712639 | Dopey2        | ENSMUSG00000022946 | 72    | 0.22 | 0.33 | 0.12 | 0.14 | 0.15 | 0.14 |
| chr16 | 91931596 | 91931996 | Atp5o         | ENSMUSG00000022956 | -133  | 0.11 | 0.09 | 0.1  | 0.15 | 0.33 | 0.21 |
| chr16 | 14159001 | 14159404 | 4921513D23Rik | ENSMUSG00000060657 | 165   | 0.24 | 0.11 | 0.16 | 0.23 | 0.08 | 0.16 |
| chr16 | 20716121 | 20718085 | Clcn2         | ENSMUSG00000022843 | -919  | 0.24 | 0.26 | 0.13 | 0.17 | 0.16 | 0.13 |

|       |          |          |               |                    |      |      |      |      |      |      |      |
|-------|----------|----------|---------------|--------------------|------|------|------|------|------|------|------|
| chr16 | 21794189 | 21794780 | 1300002E11Rik | ENSMUSG00000086651 | 64   | 0.64 | 0.38 | 0.16 | 0.18 | 0.34 | 0.18 |
| chr16 | 93603861 | 93604357 | Setd4         | ENSMUSG00000022948 | -73  | 0.22 | 0.28 | 0.09 | 0.11 | 0.11 | 0.17 |
| chr16 | 91225565 | 91227887 | Olig2         | ENSMUSG00000039830 | 931  | 0.14 | 0.18 | 0.12 | 0.16 | 0.21 | 0.13 |
| chr16 | 8424633  | 8425200  | Cldn26        | ENSMUSG00000022715 | 313  | 0.06 | 0.27 | 0.08 | 0.15 | 0.14 | 0.14 |
| chr16 | 9993713  | 9994354  | Grin2a        | ENSMUSG00000059003 | 320  | 0.54 | 0.39 | 0.09 | 0.2  | 0.33 | 0.15 |
| chr16 | 16213244 | 16213911 | Pkp2          | ENSMUSG00000041957 | 166  | 0.19 | 0.34 | 0.18 | 0.26 | 0.13 | 0.17 |
| chr16 | 16302988 | 16303712 | Yars2         | ENSMUSG00000022792 | 292  | 0.17 | 0.17 | 0.08 | 0.12 | 0.1  | 0.09 |
| chr16 | 20732859 | 20733837 | Chrd          | ENSMUSG00000006958 | 148  | 0.19 | 0.17 | 0.1  | 0.2  | 0.12 | 0.14 |
| chr16 | 22857417 | 22858287 | Tbccd1        | ENSMUSG00000004462 | -210 | 0.22 | 0.17 | 0.09 | 0.14 | 0.14 | 0.13 |
| chr16 | 35983260 | 35984172 | Gm15564       | ENSMUSG00000086324 | -400 | 0.16 | 0.18 | 0.09 | 0.11 | 0.11 | 0.14 |
| chr16 | 30063364 | 30064663 | Hes1          | ENSMUSG00000022528 | -457 | 0.14 | 0.15 | 0.16 | 0.19 | 0.1  | 0.15 |
| chr16 | 57121580 | 57122424 | Tomn70a       | ENSMUSG00000022752 | 175  | 0.14 | 0.15 | 0.1  | 0.13 | 0.08 | 0.18 |
| chr16 | 10784307 | 10786284 | Socs1         | ENSMUSG00000038037 | 334  | 0.15 | 0.14 | 0.1  | 0.17 | 0.12 | 0.14 |
| chr16 | 18088894 | 18089337 | Prodh         | ENSMUSG00000003526 | 0    | 0.17 | 0.05 | 0.07 | 0.15 | 0.05 | 0.17 |
| chr16 | 91618978 | 91619292 | Dnajc28       | ENSMUSG00000039763 | 101  | 0.38 | 0.19 | 0.18 | 0.17 | 0.11 | 0.22 |
| chr16 | 11253492 | 11254722 | Gspt1         | ENSMUSG00000062203 | 195  | 0.17 | 0.24 | 0.12 | 0.15 | 0.13 | 0.11 |
| chr16 | 13671924 | 13672540 | Bfar          | ENSMUSG00000022684 | 281  | 0.11 | 0.1  | 0.1  | 0.17 | 0.07 | 0.16 |
| chr16 | 18876436 | 18877857 | Mrpl40        | ENSMUSG00000022706 | -514 | 0.18 | 0.16 | 0.1  | 0.13 | 0.14 | 0.12 |
| chr16 | 20516855 | 20517474 | Dvl3          | ENSMUSG00000003233 | 109  | 0.16 | 0.11 | 0.11 | 0.17 | 0.11 | 0.12 |
| chr16 | 20591265 | 20591704 | Vwa5b2        | ENSMUSG00000046613 | 255  | 0.18 | 0.15 | 0.11 | 0.15 | 0.14 | 0.22 |
| chr16 | 23987537 | 23988309 | Bcl6          | ENSMUSG00000022508 | 1015 | 0.29 | 0.26 | 0.18 | 0.23 | 0.47 | 0.14 |
| chr16 | 91688591 | 91689287 | Donson        | ENSMUSG00000022960 | 9    | 0.13 | 0.1  | 0.11 | 0.13 | 0.09 | 0.13 |
| chr16 | 97831999 | 97832790 | Tmprss2       | ENSMUSG00000000385 | 408  | 0.68 | NA   | 0.1  | 0.21 | 0.2  | 0.18 |
| chr16 | 31948130 | 31948843 | 0610012G03Rik | ENSMUSG00000047112 | 94   | 0.14 | 0.15 | 0.12 | 0.15 | 0.1  | 0.14 |
| chr16 | 38522309 | 38522947 | 4930455C21Rik | ENSMUSG00000002846 | 97   | 0.11 | 0.11 | 0.16 | 0.11 | 0.06 | 0.18 |
| chr16 | 44557993 | 44558212 | Mir3081       | ENSMUSG00000093046 | 140  | 0.18 | 0.17 | 0.12 | 0.15 | 0.1  | 0.17 |
| chr16 | 32430703 | 32431497 | Pcyt1a        | ENSMUSG00000005615 | 93   | 0.27 | 0.26 | 0.1  | 0.13 | 0.19 | 0.17 |
| chr16 | 13109729 | 13110331 | Erc4          | ENSMUSG00000022545 | 253  | 0.12 | 0.08 | 0.06 | 0.17 | 0.21 | 0.11 |
| chr16 | 38742271 | 38742788 | B4galt4       | ENSMUSG00000022793 | 152  | 0.09 | 0.13 | 0.12 | 0.14 | 0.06 | 0.12 |
| chr16 | 55821736 | 55822740 | Nfkbiz        | ENSMUSG00000035356 | 13   | 0.16 | 0.19 | 0.08 | 0.16 | 0.11 | 0.15 |

|       |          |          |               |                    |      |      |      |      |      |      |      |
|-------|----------|----------|---------------|--------------------|------|------|------|------|------|------|------|
| chr16 | 48993676 | 48994641 | Dzip3         | ENSMUSG00000064061 | -104 | 1    | NA   | 0.14 | 0.22 | 0.09 | 0.22 |
| chr16 | 64770352 | 64771059 | 4930453N24Rik | ENSMUSG00000059920 | 60   | 0.3  | 0.4  | 0.15 | 0.29 | 0.21 | 0.2  |
| chr16 | 92695802 | 92696061 | Runx1         | ENSMUSG00000022952 | -36  | 0.13 | 0.07 | 0.14 | 0.38 | 0.06 | 0.22 |
| chr16 | 14361400 | 14361917 | Abcc1         | ENSMUSG00000023088 | 7    | 0.08 | 0.08 | 0.08 | 0.12 | 0.11 | 0.09 |
| chr16 | 10992487 | 10993412 | Litaf         | ENSMUSG00000022500 | 215  | 0.18 | 0.14 | 0.1  | 0.14 | 0.09 | 0.11 |
| chr16 | 92697063 | 92699136 | Runx1         | ENSMUSG00000022952 | -526 | 0.24 | 0.32 | 0.15 | 0.22 | 0.17 | 0.17 |
| chr16 | 4726299  | 4726876  | Hmox2         | ENSMUSG00000004070 | 226  | 0.22 | 0.17 | 0.15 | 0.15 | 0.11 | 0.18 |
| chr16 | 13902716 | 13903504 | Pdxdc1        | ENSMUSG00000022680 | -42  | 0.27 | 0.15 | 0.1  | 0.13 | 0.17 | 0.14 |
| chr16 | 32643902 | 32644689 | Tnk2          | ENSMUSG00000022791 | 335  | 0.29 | 0.49 | 0.12 | 0.27 | 0.23 | 0.25 |
| chr16 | 13818963 | 13819803 | Ntan1         | ENSMUSG00000022681 | 39   | 0.15 | 0.14 | 0.09 | 0.07 | 0.07 | 0.15 |
| chr16 | 23988742 | 23989037 | Bcl6          | ENSMUSG00000022508 | 49   | 0.27 | 0.04 | 0.09 | 0.12 | 0.16 | 0.15 |
| chr16 | 32332211 | 32333074 | Ubxn7         | ENSMUSG00000053774 | 304  | 0.22 | 0.13 | 0.15 | 0.25 | 0.14 | 0.16 |
| chr16 | 3743947  | 3744604  | Zfp263        | ENSMUSG00000022529 | 182  | 0.26 | 0.18 | 0.09 | 0.15 | 0.17 | 0.19 |
| chr16 | 30587539 | 30587742 | Lsg1          | ENSMUSG00000022538 | -15  | 0.15 | 0.11 | 0.12 | 0.13 | 0.05 | 0.19 |
| chr16 | 30008946 | 30009335 | 4632428C04Rik | ENSMUSG00000086897 | 387  | 0.1  | 0.11 | 0.1  | 0.16 | 0.12 | 0.18 |
| chr16 | 84834713 | 84836211 | Atp5j         | ENSMUSG00000022890 | -385 | 0.11 | 0.1  | 0.09 | 0.13 | 0.08 | 0.11 |
| chr16 | 90283814 | 90285178 | Scaf4         | ENSMUSG00000022983 | 57   | 0.12 | 0.11 | 0.12 | 0.14 | 0.14 | 0.14 |
| chr16 | 10313758 | 10314099 | Emp2          | ENSMUSG00000022505 | 133  | 0.08 | 0.05 | 0.06 | 0.1  | 0.06 | 0.1  |
| chr16 | 31200339 | 31201480 | Acap2         | ENSMUSG00000049076 | 168  | 0.16 | 0.11 | 0.13 | 0.1  | 0.13 | 0.15 |
| chr16 | 44558401 | 44558917 | Boc           | ENSMUSG00000022687 | 324  | 0.33 | 0.4  | 0.07 | 0.17 | 0.25 | 0.15 |
| chr16 | 63863727 | 63864254 | Epha3         | ENSMUSG00000052504 | -6   | 0.16 | 0.24 | 0.09 | 0.12 | 0.1  | 0.09 |
| chr16 | 93608040 | 93608490 | Cbr1          | ENSMUSG00000051483 | 183  | 0.17 | 0.44 | 0.11 | 0.22 | 0.08 | 0.19 |
| chr16 | 21423148 | 21423642 | Vps8          | ENSMUSG00000033653 | 204  | 0.1  | 0.15 | 0.11 | 0.15 | 0.15 | 0.1  |
| chr16 | 15863288 | 15863587 | Mzt2          | ENSMUSG00000022671 | 3    | 0.3  | 0.18 | 0.16 | 0.21 | 0.12 | 0.12 |
| chr16 | 18629574 | 18630226 | 5-Sep         | ENSMUSG00000072214 | 104  | 0.21 | 0.14 | 0.11 | 0.14 | 0.15 | 0.19 |
| chr16 | 59600370 | 59600963 | Gm9581        | ENSMUSG00000091562 | 46   | 0.14 | 0.06 | 0.08 | 0.12 | 0.11 | 0.11 |
| chr16 | 23107355 | 23108586 | Eif4a2        | ENSMUSG00000022884 | 453  | 0.11 | 0.09 | 0.15 | 0.14 | 0.14 | 0.15 |
| chr16 | 18586348 | 18587305 | Tbx1          | ENSMUSG00000009097 | 236  | 0.14 | 0.22 | 0.11 | 0.13 | 0.16 | 0.1  |
| chr16 | 9994760  | 9995970  | Grin2a        | ENSMUSG00000059003 | -351 | 0.24 | 0.17 | 0.29 | 0.24 | 0.17 | 0.24 |
| chr16 | 20611410 | 20611887 | Ece2          | ENSMUSG00000022842 | -18  | 0.33 | 0.2  | 0.16 | 0.24 | 0.12 | 0.24 |

|       |          |          |         |                    |       |      |      |      |      |      |      |
|-------|----------|----------|---------|--------------------|-------|------|------|------|------|------|------|
| chr16 | 30066308 | 30067149 | Hes1    | ENSMUSG00000022528 | 304   | 0.13 | 0.12 | 0.13 | 0.13 | 0.22 | 0.18 |
| chr16 | 75593020 | 75593444 | Rbm11   | ENSMUSG00000032940 | 143   | 0.22 | 0.18 | 0.16 | 0.25 | 0.11 | 0.08 |
| chr16 | 4679141  | 4679355  | Coro7   | ENSMUSG00000039637 | 430   | 0.28 | 0.37 | 0.1  | 0.16 | 0.37 | 0.17 |
| chr16 | 13780686 | 13781075 | Rrn3    | ENSMUSG00000022682 | 88    | 0.2  | 0.47 | 0.1  | 0.2  | 0.28 | 0.18 |
| chr16 | 14292446 | 14292651 | Myh11   | ENSMUSG00000018830 | -1047 | 0.13 | 0.33 | 0.15 | 0.18 | 0.18 | 0.11 |
| chr16 | 17070242 | 17070520 | Ypel1   | ENSMUSG00000022773 | 130   | 0.17 | 0.05 | 0.12 | 0.12 | 0.23 | 0.09 |
| chr16 | 44347435 | 44347925 | Spice1  | ENSMUSG00000043065 | 153   | 0.25 | 0.24 | 0.13 | 0.15 | 0.1  | 0.17 |
| chr16 | 95219015 | 95219437 | Kcnj6   | ENSMUSG00000043301 | 77    | 1    | 0.7  | 0.12 | 0.29 | 0.11 | 0.36 |
| chr16 | 87440517 | 87440920 | Rwdd2b  | ENSMUSG00000041079 | 100   | 0.25 | 0.33 | 0.15 | 0.34 | 0.38 | 0.25 |
| chr16 | 45742806 | 45743087 | Abhd10  | ENSMUSG00000033157 | 52    | 0.71 | 0.33 | 0.15 | 0.09 | 0.47 | 0.22 |
| chr16 | 57549286 | 57549577 | Filip1l | ENSMUSG00000043336 | 76    | 0.13 | 0.14 | 0.08 | 0.15 | 0.1  | 0.09 |
| chr16 | 20619837 | 20622428 | Camk2n2 | ENSMUSG00000051146 | 228   | 0.12 | 0.12 | 0.1  | 0.15 | 0.1  | 0.14 |
| chr16 | 37654103 | 37654656 | Ndufb4  | ENSMUSG00000022820 | 160   | 0.15 | 0.2  | 0.14 | 0.16 | 0.1  | 0.16 |
| chr16 | 4684006  | 4684336  | Dnaja3  | ENSMUSG0000004069  | 101   | 0.11 | 0.09 | 0.14 | 0.16 | 0.16 | 0.13 |
| chr16 | 13256354 | 13257157 | Mkl2    | ENSMUSG00000009569 | 181   | 0.08 | 0.13 | 0.13 | 0.13 | 0.1  | 0.13 |
| chr16 | 17405871 | 17406450 | Pi4ka   | ENSMUSG00000041720 | -174  | 0.08 | 0.21 | 0.1  | 0.09 | 0.16 | 0.13 |
| chr16 | 28445104 | 28447031 | Fgf12   | ENSMUSG00000022523 | -754  | 0.1  | 0.15 | 0.11 | 0.13 | 0.08 | 0.14 |
| chr16 | 37011746 | 37012174 | Polq    | ENSMUSG00000034206 | 88    | 0.29 | 0.24 | 0.13 | 0.24 | 0.23 | 0.18 |
| chr16 | 87432324 | 87432985 | Ltn1    | ENSMUSG00000052299 | 151   | 0.14 | 0.14 | 0.1  | 0.15 | 0.12 | 0.18 |
| chr16 | 93683465 | 93684076 | Cbr3    | ENSMUSG00000022947 | 310   | 1    | 0.18 | 0.14 | 0.17 | 0.21 | 0.27 |
| chr16 | 96348644 | 96349819 | Hmgn1   | ENSMUSG00000040681 | -158  | 0.21 | 0.09 | 0.11 | 0.11 | 0.15 | 0.2  |
| chr16 | 5131748  | 5131977  | Ppl     | ENSMUSG00000039457 | 712   | 0.17 | 0.37 | 0.11 | 0.13 | 0.12 | 0.19 |
| chr16 | 52031537 | 52032442 | Cblb    | ENSMUSG00000022637 | 327   | 0.25 | 0.16 | 0.13 | 0.22 | 0.16 | 0.13 |
| chr16 | 18234848 | 18235403 | Zdhc8   | ENSMUSG00000060166 | 104   | 0.11 | 0.08 | 0.07 | 0.15 | 0.15 | 0.14 |
| chr16 | 18777207 | 18778039 | Cldn5   | ENSMUSG00000041378 | 683   | 0.23 | 0.47 | 0.13 | 0.25 | 0.31 | 0.16 |
| chr16 | 38562805 | 38563310 | Tmem39a | ENSMUSG00000002845 | 132   | 0.13 | 0.09 | 0.13 | 0.2  | 0.1  | 0.14 |
| chr16 | 98072777 | 98073529 | Prdm15  | ENSMUSG00000014039 | -319  | 0.09 | 0.11 | 0.09 | 0.18 | 0.1  | 0.12 |
| chr16 | 35768957 | 35769626 | Dirc2   | ENSMUSG00000022848 | 125   | 0.17 | 0.15 | 0.09 | 0.16 | 0.21 | 0.17 |
| chr16 | 62846424 | 62846992 | Arl13b  | ENSMUSG00000022911 | 98    | 0.16 | 0.3  | 0.12 | 0.12 | 0.09 | 0.12 |
| chr16 | 16983321 | 16984160 | Mapk1   | ENSMUSG00000063358 | 265   | 0.17 | 0.23 | 0.09 | 0.16 | 0.13 | 0.1  |

|       |          |          |               |                    |       |      |      |      |      |      |      |
|-------|----------|----------|---------------|--------------------|-------|------|------|------|------|------|------|
| chr16 | 34572789 | 34573255 | Kalm          | ENSMUSG00000061751 | 596   | 0.14 | 0.12 | 0.08 | 0.09 | 0.08 | 0.15 |
| chr16 | 35938573 | 35939249 | Parp9         | ENSMUSG00000022906 | -186  | 0.5  | 0.25 | 0.12 | 0.18 | 0.11 | 0.18 |
| chr16 | 22161426 | 22163437 | Igf2bp2       | ENSMUSG00000033581 | -908  | 0.1  | 0.18 | 0.12 | 0.16 | 0.12 | 0.13 |
| chr16 | 31428811 | 31430122 | Bdh1          | ENSMUSG00000046598 | 632   | 0.14 | 0.35 | 0.09 | 0.14 | 0.18 | 0.16 |
| chr16 | 75766926 | 75767221 | Hspa13        | ENSMUSG00000032932 | -46   | 0.05 | 0.16 | 0.17 | 0.09 | 0.08 | 0.06 |
| chr16 | 13448148 | 13448795 | Mir193b       | ENSMUSG00000076972 | -1145 | 0.31 | 0.36 | 0.11 | 0.19 | 0.25 | 0.17 |
| chr16 | 23224965 | 23225577 | BC106179      | ENSMUSG00000045231 | 170   | 0.14 | 0.34 | 0.18 | 0.22 | 0.33 | 0.18 |
| chr16 | 4789406  | 4790347  | 5730403B10Rik | ENSMUSG0000004071  | 54    | 0.21 | 0.13 | 0.12 | 0.09 | 0.31 | 0.19 |
| chr16 | 5255792  | 5256212  | Fam86         | ENSMUSG00000022544 | 20    | 0.23 | 0.44 | 0.13 | 0.15 | 0.19 | 0.24 |
| chr16 | 17201045 | 17201509 | Ube2l3        | ENSMUSG00000038965 | 289   | 0.18 | 0.64 | 0.14 | 0.21 | 0.21 | 0.2  |
| chr16 | 10192812 | 10193406 | Atf7ip2       | ENSMUSG00000039200 | 110   | 0.09 | 0.14 | 0.11 | 0.22 | 0.11 | 0.13 |
| chr16 | 16870810 | 16871156 | Top3b         | ENSMUSG00000022779 | 154   | 0.23 | 0.16 | 0.13 | 0.13 | 0.2  | 0.17 |
| chr16 | 17451874 | 17452936 | Crkl          | ENSMUSG00000006134 | 325   | 0.16 | 0.18 | 0.11 | 0.18 | 0.12 | 0.21 |
| chr16 | 36828138 | 36828759 | Eaf2          | ENSMUSG00000022838 | -151  | 0.14 | 0.1  | 0.07 | 0.15 | 0.03 | 0.18 |
| chr16 | 49855309 | 49856137 | Cd47          | ENSMUSG00000055447 | -8    | 0.1  | 0.14 | 0.09 | 0.14 | 0.12 | 0.13 |
| chr16 | 65815167 | 65816098 | Vgll3         | ENSMUSG00000091243 | -246  | 0.17 | 0.19 | 0.15 | 0.18 | 0.15 | 0.11 |
| chr16 | 18066414 | 18067002 | Dgcr6         | ENSMUSG00000003531 | 212   | 0.28 | 0.37 | 0.13 | 0.12 | 0.22 | 0.16 |
| chr16 | 18836771 | 18837103 | 2510002D24Rik | ENSMUSG00000071632 | 264   | 0.17 | 0.25 | 0.07 | 0.07 | 1    | 0.12 |
| chr16 | 37916318 | 37916697 | Gpr156        | ENSMUSG00000046961 | -75   | 0.16 | 0.69 | 0.14 | 0.16 | 0.2  | 0.21 |
| chr16 | 58670280 | 58670942 | Cpox          | ENSMUSG00000022742 | 290   | 1    | 0.64 | 0.14 | 0.29 | 0.27 | 0.14 |
| chr16 | 65562505 | 65563128 | Chmp2b        | ENSMUSG00000004843 | 126   | 0.13 | 0.2  | 0.09 | 0.12 | 0.07 | 0.18 |
| chr16 | 17797560 | 17798806 | Scarf2        | ENSMUSG00000012017 | 808   | 0.12 | 0.18 | 0.17 | 0.15 | 0.1  | 0.16 |
| chr16 | 31080793 | 31081626 | AI480653      | ENSMUSG00000047434 | 309   | 0.11 | 0.22 | 0.1  | 0.14 | 0.1  | 0.13 |
| chr16 | 20425982 | 20426681 | Abcc5         | ENSMUSG00000022822 | -272  | 0.2  | 0.22 | 0.1  | 0.09 | 0.16 | 0.14 |
| chr16 | 55966510 | 55966818 | Rpl24         | ENSMUSG00000022601 | 130   | 0.12 | 0.08 | 0.08 | 0.18 | 0.09 | 0.13 |
| chr16 | 91269822 | 91271984 | Olig1         | ENSMUSG00000046160 | 889   | 0.11 | 0.16 | 0.11 | 0.14 | 0.15 | 0.13 |
| chr16 | 91597475 | 91598275 | Tmem50b       | ENSMUSG00000022964 | 34    | 0.18 | 0.11 | 0.1  | 0.14 | 0.13 | 0.18 |
| chr16 | 31274782 | 31275404 | Ppp1r2        | ENSMUSG00000047714 | -15   | 0.45 | 0.45 | 0.12 | 0.27 | 0.43 | 0.2  |
| chr16 | 17405434 | 17405687 | Pi4ka         | ENSMUSG00000041720 | 426   | 1    | 0.35 | 0.2  | 0.43 | 0.29 | 0.39 |
| chr16 | 32877533 | 32878585 | Fytd1         | ENSMUSG00000022800 | 473   | 0.19 | 0.28 | 0.13 | 0.22 | 0.17 | 0.13 |

|       |          |          |               |                    |      |      |      |      |      |      |      |
|-------|----------|----------|---------------|--------------------|------|------|------|------|------|------|------|
| chr16 | 36693924 | 36694208 | Ildr1         | ENSMUSG00000022900 | 2    | 0.2  | 0.18 | 0.13 | 0.31 | 0.17 | 0.13 |
| chr16 | 18248123 | 18249388 | Ranbp1        | ENSMUSG00000005732 | -595 | 0.12 | 0.13 | 0.1  | 0.14 | 0.1  | 0.17 |
| chr16 | 33829665 | 33830462 | Itgb5         | ENSMUSG00000022817 | 312  | 0.19 | 0.12 | 0.1  | 0.14 | 0.15 | 0.14 |
| chr16 | 4077466  | 4078059  | Trap1         | ENSMUSG00000005981 | 65   | 1    | 0.13 | 0.15 | 0.16 | 0.31 | 0.18 |
| chr16 | 56717204 | 56717723 | Tfg           | ENSMUSG00000022757 | -168 | 0.08 | 0.12 | 0.09 | 0.12 | 0.07 | 0.12 |
| chr16 | 91044143 | 91044968 | Gcfc1         | ENSMUSG00000022974 | -146 | 0.5  | 0.32 | 0.11 | 0.17 | 0.37 | 0.15 |
| chr16 | 58728031 | 58728463 | Cldn25        | ENSMUSG00000022744 | 209  | 0.14 | 0.12 | 0.1  | 0.15 | 0.08 | 0.12 |
| chr16 | 15594123 | 15594653 | Ube2v2        | ENSMUSG00000022674 | 177  | 0.22 | 0.16 | 0.12 | 0.18 | 0.35 | 0.19 |
| chr16 | 17619402 | 17619775 | Smpd4         | ENSMUSG00000005899 | 141  | 0.19 | 0.06 | 0.14 | 0.25 | 0.12 | 0.13 |
| chr16 | 98143763 | 98144429 | C2cd2         | ENSMUSG00000045975 | 147  | 0.05 | 0.28 | 0.11 | 0.19 | 0.07 | 0.13 |
| chr16 | 30308461 | 30309321 | Gp5           | ENSMUSG00000047953 | 1974 | 0.13 | 0.14 | 0.13 | 0.14 | 0.12 | 0.14 |
| chr16 | 32246522 | 32247391 | Fbxo45        | ENSMUSG00000035764 | 288  | 0.34 | 0.31 | 0.1  | 0.14 | 0.29 | 0.21 |
| chr16 | 56029308 | 56030282 | Pcnp          | ENSMUSG00000071533 | -6   | 0.19 | 0.15 | 0.14 | 0.19 | 0.14 | 0.12 |
| chr16 | 91465191 | 91465511 | A930006K02Rik | ENSMUSG00000084866 | 2    | 0.2  | NA   | 0.14 | 0.22 | 0.44 | 0.1  |
| chr16 | 85802235 | 85803557 | Adamts1       | ENSMUSG00000022893 | 462  | 0.12 | 0.21 | 0.07 | 0.13 | 0.1  | 0.09 |
| chr16 | 62786346 | 62786743 | Nsun3         | ENSMUSG00000050312 | -5   | 0.06 | 0.1  | 0.11 | 0.15 | 0.08 | 0.1  |
| chr16 | 21204664 | 21205698 | Ephb3         | ENSMUSG00000005958 | 353  | 0.11 | 0.19 | 0.14 | 0.16 | 0.12 | 0.13 |
| chr16 | 23127760 | 23128174 | Rfc4          | ENSMUSG00000022881 | -203 | 1    | 0.09 | 0.11 | 0.23 | 0.33 | 0.19 |
| chr16 | 93832258 | 93832981 | Morc3         | ENSMUSG00000039456 | 253  | 0.08 | 0.08 | 0.08 | 0.13 | 0.07 | 0.09 |
| chr16 | 87698963 | 87699803 | Bach1         | ENSMUSG00000025612 | 193  | 0.16 | 0.11 | 0.11 | 0.12 | 0.18 | 0.12 |
| chr16 | 90830310 | 90831709 | 4931408A02Rik | ENSMUSG00000039903 | -44  | 0.15 | 0.14 | 0.11 | 0.17 | 0.18 | 0.14 |
| chr16 | 94534866 | 94535386 | Hlcs          | ENSMUSG00000040820 | 44   | 0.11 | 0.19 | 0.09 | 0.17 | 0.07 | 0.09 |
| chr16 | 97392111 | 97392648 | Dscam         | ENSMUSG00000050272 | -20  | 0.1  | 0.06 | 0.1  | 0.15 | 0.08 | 0.09 |
| chr16 | 18127361 | 18128364 | Rtn4r         | ENSMUSG00000043811 | 127  | 0.17 | 0.13 | 0.08 | 0.12 | 0.16 | 0.12 |
| chr16 | 91372987 | 91373555 | Ifnar2        | ENSMUSG00000022971 | 243  | 0.12 | 0.36 | 0.08 | 0.16 | 0.14 | 0.14 |
| chr16 | 94549737 | 94550200 | Ripply3       | ENSMUSG00000022941 | -59  | 0.09 | 0.17 | 0.09 | 0.2  | 0.07 | 0.09 |
| chr16 | 91547152 | 91547638 | Ifngr2        | ENSMUSG00000022965 | 78   | 0.5  | 0.64 | 0.14 | 0.19 | 1    | 0.13 |
| chr16 | 3884214  | 3884995  | Zfp597        | ENSMUSG00000039789 | -99  | 0.12 | 0.08 | 0.12 | 0.12 | 0.11 | 0.1  |
| chr16 | 4879231  | 4881005  | Fam100a       | ENSMUSG00000039568 | -313 | 0.09 | 0.14 | 0.11 | 0.11 | 0.09 | 0.1  |
| chr16 | 33056259 | 33057207 | lqcg          | ENSMUSG00000035578 | -462 | 0.58 | 0.23 | 0.18 | 0.14 | 0.5  | 0.26 |

|       |          |          |               |                    |      |      |      |      |      |      |      |
|-------|----------|----------|---------------|--------------------|------|------|------|------|------|------|------|
| chr16 | 35154424 | 35157063 | Adcy5         | ENSMUSG00000022840 | 780  | 0.1  | 0.14 | 0.11 | 0.15 | 0.1  | 0.15 |
| chr16 | 92466044 | 92466798 | Rcan1         | ENSMUSG00000022951 | -30  | 0.09 | 0.06 | 0.1  | 0.14 | 0.08 | 0.11 |
| chr16 | 17759579 | 17760380 | Klhl22        | ENSMUSG00000022750 | 268  | 0.12 | 0.11 | 0.1  | 0.16 | 0.13 | 0.18 |
| chr16 | 36071417 | 36072215 | Fam162a       | ENSMUSG00000003955 | -215 | 0.11 | 0.18 | 0.15 | 0.08 | 0.09 | 0.17 |
| chr16 | 4886293  | 4886668  | Mgrn1         | ENSMUSG00000022517 | 199  | 0.06 | 0.11 | 0.08 | 0.14 | 0.07 | 0.11 |
| chr16 | 16358632 | 16359178 | Dnm1l         | ENSMUSG00000022789 | 218  | 0.15 | 0.19 | 0.11 | 0.19 | 0.16 | 0.13 |
| chr16 | 56037537 | 56038162 | Rg9mtd1       | ENSMUSG00000044763 | 83   | 0.12 | 0.14 | 0.13 | 0.1  | 0.11 | 0.17 |
| chr16 | 85172828 | 85174375 | App           | ENSMUSG00000022892 | 347  | 0.42 | 0.14 | 0.09 | 0.22 | 0.4  | 0.13 |
| chr16 | 30388057 | 30389100 | Atp13a3       | ENSMUSG00000022533 | -7   | 0.18 | 0.24 | 0.09 | 0.12 | 0.19 | 0.15 |
| chr16 | 11175868 | 11176605 | Zc3h7a        | ENSMUSG00000037965 | -79  | 0.33 | 0.25 | 0.15 | 0.12 | 0.13 | 0.15 |
| chr16 | 4419636  | 4420698  | Adcy9         | ENSMUSG00000005580 | -359 | 0.21 | 0.12 | 0.11 | 0.14 | 0.22 | 0.14 |
| chr16 | 17208653 | 17210592 | Rimbp3        | ENSMUSG00000071636 | 1394 | 0.12 | 0.21 | 0.1  | 0.13 | 0.13 | 0.12 |
| chr16 | 20097670 | 20098459 | Klhl24        | ENSMUSG00000062901 | 437  | 0.78 | 0.43 | 0.16 | 0.26 | 0.74 | 0.15 |
| chr16 | 22439280 | 22440266 | Etv5          | ENSMUSG00000013089 | -130 | 0.1  | 0.09 | 0.11 | 0.1  | 0.11 | 0.13 |
| chr16 | 22656882 | 22657353 | Dgkg          | ENSMUSG00000022861 | -16  | 0.08 | 0.14 | 0.08 | 0.15 | 0.09 | 0.12 |
| chr16 | 50528788 | 50529761 | G730013B05Rik | ENSMUSG00000085617 | 659  | 0.12 | 0.22 | 0.08 | 0.12 | 0.1  | 0.12 |
| chr16 | 8513358  | 8513700  | Abat          | ENSMUSG00000057880 | 7    | 0.24 | 0.8  | 0.2  | 0.13 | 0.21 | 0.12 |
| chr16 | 32277469 | 32277969 | Rnf168        | ENSMUSG00000014074 | 174  | 0.15 | 0.2  | 0.12 | 0.15 | 0.16 | 0.2  |
| chr16 | 33380698 | 33381535 | 1700007L15Rik | ENSMUSG00000090918 | -303 | 0.07 | 0.06 | 0.12 | 0.18 | 0.07 | 0.13 |
| chr16 | 44724471 | 44724893 | BC027231      | ENSMUSG00000036208 | 212  | 0.31 | 0.29 | 0.17 | 0.18 | 0.34 | 0.2  |
| chr16 | 37868158 | 37869250 | Lrrc58        | ENSMUSG00000034158 | 229  | 0.11 | 0.09 | 0.11 | 0.15 | 0.11 | 0.13 |
| chr16 | 97984751 | 97985540 | Ripk4         | ENSMUSG00000005251 | -47  | 0.11 | 0.15 | 0.18 | 0.15 | 0.11 | 0.15 |
| chr16 | 3872260  | 3872728  | Nat15         | ENSMUSG00000005982 | 119  | 0.5  | 0.43 | 0.16 | 0.21 | 0.47 | 0.13 |
| chr16 | 3908918  | 3909244  | Cluap1        | ENSMUSG00000014232 | 42   | 0.25 | 0.42 | 0.25 | 0.23 | 0.2  | 0.11 |
| chr16 | 4212834  | 4214506  | Crebbp        | ENSMUSG00000022521 | -447 | 0.12 | 0.13 | 0.09 | 0.19 | 0.11 | 0.13 |
| chr16 | 4558597  | 4559691  | Tfap4         | ENSMUSG00000005718 | 576  | 0.11 | 0.1  | 0.1  | 0.19 | 0.14 | 0.15 |
| chr16 | 4624513  | 4625028  | Pam16         | ENSMUSG00000014301 | 166  | 0.14 | 0.16 | 0.15 | 0.15 | 0.15 | 0.29 |
| chr16 | 5132363  | 5132818  | Ppl           | ENSMUSG00000039457 | -16  | 0.12 | 0.24 | 0.07 | 0.18 | 0.1  | 0.13 |
| chr16 | 8671685  | 8672595  | Carhsp1       | ENSMUSG00000008393 | 106  | 0.22 | 0.16 | 0.14 | 0.19 | 0.23 | 0.22 |
| chr16 | 10395147 | 10395384 | Tekt5         | ENSMUSG00000039179 | 276  | 0.25 | 0.25 | 0.12 | 0.19 | 0.14 | 0.14 |

|       |          |          |               |                    |      |      |      |      |      |      |      |
|-------|----------|----------|---------------|--------------------|------|------|------|------|------|------|------|
| chr16 | 10411942 | 10412281 | Nubp1         | ENSMUSG00000022503 | 70   | 0.22 | 0.29 | 0.1  | 0.15 | 0.2  | 0.15 |
| chr16 | 10542512 | 10543241 | Dexi          | ENSMUSG00000038055 | 271  | 0.1  | 0.27 | 0.09 | 0.07 | 0.1  | 0.07 |
| chr16 | 10835059 | 10835501 | A630055G03Rik | ENSMUSG00000037991 | 128  | 0.09 | 0.18 | 0.07 | 0.17 | 0.07 | 0.08 |
| chr16 | 13940796 | 13941194 | Mpv17l        | ENSMUSG00000022679 | -192 | 0.17 | 0.2  | 0.1  | 0.17 | 0.15 | 0.14 |
| chr16 | 17146948 | 17148067 | Ydjc          | ENSMUSG00000041774 | 477  | 0.06 | 0.06 | 0.09 | 0.25 | 0.07 | 0.14 |
| chr16 | 18348228 | 18349066 | Arvcf         | ENSMUSG00000000325 | 372  | 0.15 | 0.12 | 0.07 | 0.17 | 0.14 | 0.13 |
| chr16 | 19761146 | 19761464 | B3gnt5        | ENSMUSG00000022686 | 158  | 0.09 | 0.14 | 0.06 | 0.18 | 0.11 | 0.09 |
| chr16 | 20141130 | 20141631 | Yeats2        | ENSMUSG00000041215 | 244  | 0.14 | NA   | 0.08 | 0.14 | 0.07 | 0.12 |
| chr16 | 20302051 | 20302545 | Parl          | ENSMUSG00000033918 | 115  | 0.17 | 0.11 | 0.09 | 0.17 | 0.09 | 0.23 |
| chr16 | 20498942 | 20499220 | Eif2b5        | ENSMUSG00000003235 | 191  | 0.07 | 0.11 | 0.1  | 0.09 | 0.07 | 0.12 |
| chr16 | 20651627 | 20652074 | Psmc2         | ENSMUSG00000006998 | 125  | 0.15 | 0.24 | 0.11 | 0.15 | 0.14 | 0.14 |
| chr16 | 20695888 | 20696286 | Fam131a       | ENSMUSG00000050821 | -161 | 0.08 | 0.17 | 0.11 | 0.29 | 0.1  | 0.23 |
| chr16 | 23890700 | 23890945 | Sst           | ENSMUSG00000004366 | 108  | 0.07 | NA   | 0.08 | 0.14 | 0.07 | 0.08 |
| chr16 | 26105274 | 26106015 | Leprel1       | ENSMUSG00000038168 | 226  | 0.08 | 0.11 | 0.11 | 0.11 | 0.09 | 0.13 |
| chr16 | 31663611 | 31663981 | Dlg1          | ENSMUSG00000022770 | -199 | 0.12 | 0.33 | 0.2  | 0.21 | 0.22 | 0.32 |
| chr16 | 32078846 | 32079412 | Pak2          | ENSMUSG00000022781 | 299  | 0.12 | 0.14 | 0.1  | 0.15 | 0.13 | 0.15 |
| chr16 | 32099477 | 32100012 | Pigx          | ENSMUSG00000023791 | 35   | 0.08 | 0.23 | 0.07 | 0.18 | 0.08 | 0.22 |
| chr16 | 32868089 | 32868312 | 1700021K19Rik | ENSMUSG00000035629 | 224  | 0.1  | 0.11 | 0.16 | 0.1  | 0.05 | 0.17 |
| chr16 | 33062327 | 33062899 | Lmln          | ENSMUSG00000022802 | 6    | 0.18 | 0.29 | 0.09 | 0.14 | 0.17 | 0.14 |
| chr16 | 33966841 | 33967167 | Umps          | ENSMUSG00000022814 | 85   | 0.14 | 0.09 | 0.1  | 0.21 | 0.14 | 0.11 |
| chr16 | 36875178 | 36875761 | Golgb1        | ENSMUSG00000034243 | 243  | 0.14 | 0.31 | 0.12 | 0.12 | 0.13 | 0.12 |
| chr16 | 37384415 | 37385146 | Stxbp5l       | ENSMUSG00000022829 | 136  | 0.11 | 0.15 | 0.12 | 0.17 | 0.12 | 0.1  |
| chr16 | 37776967 | 37777475 | Fstl1         | ENSMUSG00000022816 | 80   | 0.16 | 0.14 | 0.14 | 0.23 | 0.17 | 0.25 |
| chr16 | 38346984 | 38347337 | Cox17         | ENSMUSG00000046516 | 83   | 0.1  | 0.21 | 0.09 | 0.15 | 0.12 | 0.15 |
| chr16 | 38902305 | 38902843 | Igsf11        | ENSMUSG00000022790 | 145  | 0.17 | 0.17 | 0.1  | 0.17 | 0.15 | 0.16 |
| chr16 | 45844419 | 45844802 | Phldb2        | ENSMUSG00000033149 | -154 | 0.06 | 0.12 | 0.08 | 0.08 | 0.07 | 0.2  |
| chr16 | 46010508 | 46010755 | Plcxd2        | ENSMUSG00000087141 | -300 | 0.33 | 0.82 | 0.3  | 0.22 | 0.26 | 0.24 |
| chr16 | 49699148 | 49699744 | Ift57         | ENSMUSG00000032965 | 100  | 0.11 | 0.21 | 0.06 | 0.12 | 0.11 | 0.11 |
| chr16 | 50430089 | 50430474 | Bbx           | ENSMUSG00000022641 | -256 | 0.08 | 0.18 | 0.07 | 0.13 | 0.05 | 0.11 |
| chr16 | 50732539 | 50732997 | 5330426P16Rik | ENSMUSG00000022639 | 82   | 0.1  | 0.16 | 0.14 | 0.17 | 0.12 | 0.14 |



|       |          |          |               |                    |      |      |      |      |      |      |      |
|-------|----------|----------|---------------|--------------------|------|------|------|------|------|------|------|
| chr16 | 55933966 | 55934626 | Cep97         | ENSMUSG00000022604 | 50   | 0.11 | 0.12 | 0.12 | 0.23 | 0.06 | 0.14 |
| chr16 | 56075501 | 56076241 | Senp7         | ENSMUSG00000052917 | 349  | 0.14 | 0.1  | 0.13 | 0.35 | 0.15 | 0.16 |
| chr16 | 57166954 | 57167533 | Nit2          | ENSMUSG00000022751 | 202  | 0.17 | 0.19 | 0.22 | 0.28 | 0.21 | 0.25 |
| chr16 | 57606592 | 57607061 | 2610528E23Rik | ENSMUSG00000022748 | 116  | 0.14 | 0.04 | 0.06 | 0.14 | 0.12 | 0.12 |
| chr16 | 58523004 | 58523705 | St3gal6       | ENSMUSG00000022747 | 103  | 0.13 | 0.16 | 0.13 | 0.2  | 0.11 | 0.16 |
| chr16 | 59638969 | 59639381 | Arl6          | ENSMUSG00000022722 | -182 | 0.11 | 0.28 | 0.09 | 0.18 | 0.12 | 0.17 |
| chr16 | 65105370 | 65105616 | Htr1f         | ENSMUSG00000050783 | 117  | 0.25 | 0.26 | 0.11 | 0.17 | 0.2  | 0.16 |
| chr16 | 87354432 | 87354812 | N6amt1        | ENSMUSG00000044442 | 150  | 0.1  | 0.17 | 0.19 | 0.11 | 0.09 | 0.18 |
| chr16 | 87495635 | 87496285 | Cct8          | ENSMUSG00000025613 | -11  | 1    | 0.46 | 0.16 | 0.22 | 1    | 0.18 |
| chr16 | 92498596 | 92499478 | Clic6         | ENSMUSG00000022949 | 658  | 0.17 | 0.21 | 0.18 | 0.23 | 0.17 | 0.2  |
| chr16 | 94747860 | 94748814 | Dscr3         | ENSMUSG00000022898 | -313 | 0.21 | 0.16 | 0.17 | 0.25 | 0.2  | 0.24 |
| chr16 | 95807017 | 95807436 | Erg           | ENSMUSG00000040732 | 974  | 0.12 | 0.09 | 0.11 | 0.12 | 0.1  | 0.13 |
| chr16 | 96366745 | 96367401 | Wrb           | ENSMUSG00000023147 | 59   | 0.2  | NA   | 0.09 | 0.31 | 0.26 | 0.25 |
| chr16 | 96413425 | 96413995 | Lca5l         | ENSMUSG00000045275 | 147  | 0.19 | 0.33 | 0.16 | 0.28 | 0.22 | 0.11 |
| chr16 | 96502391 | 96502721 | B3gal5        | ENSMUSG00000074892 | 151  | 0.19 | NA   | 0.11 | 0.35 | 0.21 | 0.1  |
| chr16 | 98183187 | 98184024 | Zfp295        | ENSMUSG00000046962 | 181  | 0.18 | 0.42 | 0.1  | 0.2  | 0.18 | 0.11 |
| chr16 | 5233684  | 5233934  | Alg1          | ENSMUSG00000039427 | 95   | NA   | NA   | 0.17 | NA   | NA   | 1    |
| chr16 | 11203084 | 11203834 | Rsl1d1        | ENSMUSG00000005846 | -102 | NA   | 1    | 0.11 | 0.17 | 0.09 | 0.34 |
| chr16 | 14317229 | 14317579 | Gm15869       | ENSMUSG00000087557 | -26  | NA   | 1    | 0.2  | NA   | NA   | NA   |
| chr16 | 14705912 | 14706221 | Snai2         | ENSMUSG00000022676 | 121  | NA   | NA   | 0.2  | 1    | NA   | 0.25 |
| chr16 | 16829125 | 16829467 | Spag6         | ENSMUSG00000022783 | 78   | NA   | 0.25 | 0.11 | 0.16 | 0.05 | 0.23 |
| chr16 | 20548268 | 20548825 | Abcf3         | ENSMUSG00000003234 | -104 | NA   | NA   | 0.5  | NA   | NA   | NA   |
| chr16 | 21947316 | 21947721 | Tmem41a       | ENSMUSG00000022856 | 85   | NA   | NA   | 0.07 | 0.14 | 0.17 | 0.15 |
| chr16 | 26581574 | 26581948 | Il1rap        | ENSMUSG00000022514 | -29  | NA   | NA   | 0.09 | 0.1  | 0.07 | 0.12 |
| chr16 | 29210093 | 29210351 | Hrasls        | ENSMUSG00000022525 | 28   | NA   | NA   | NA   | 0.45 | NA   | NA   |
| chr16 | 29946039 | 29946352 | Gm16761       | ENSMUSG00000084810 | 408  | NA   | 0.09 | 0.08 | 0.22 | NA   | 0.16 |
| chr16 | 30309592 | 30309929 | Gp5           | ENSMUSG00000047953 | 1105 | NA   | NA   | 1    | NA   | NA   | NA   |
| chr16 | 30550232 | 30550829 | Tmem44        | ENSMUSG00000022537 | 84   | NA   | 1    | 0.2  | 1    | NA   | 0.25 |
| chr16 | 31932960 | 31933297 | Pigz          | ENSMUSG00000045625 | -809 | NA   | 0.33 | 0.09 | 0.1  | NA   | 0.31 |
| chr16 | 31933839 | 31934128 | Pigz          | ENSMUSG00000045625 | 46   | NA   | NA   | NA   | NA   | 1    | 1    |

|       |          |          |               |                    |      |      |      |      |      |      |      |
|-------|----------|----------|---------------|--------------------|------|------|------|------|------|------|------|
| chr16 | 32165347 | 32165681 | Lrrc33        | ENSMUSG00000052384 | 29   | NA   | NA   | 0.2  | 0.33 | 0.58 | 0.12 |
| chr16 | 32419742 | 32420145 | Tctex1d2      | ENSMUSG00000014075 | 155  | NA   | 0.17 | 0.1  | 0.23 | 0.14 | 0.22 |
| chr16 | 32608750 | 32609479 | Tfrc          | ENSMUSG00000022797 | 108  | NA   | 0.14 | 0.2  | 0.13 | 0.09 | 0.11 |
| chr16 | 34745169 | 34745506 | Mylk          | ENSMUSG00000022836 | 41   | NA   | NA   | 0.14 | 0.08 | 0.12 | 0.07 |
| chr16 | 35770249 | 35770705 | Hspbap1       | ENSMUSG00000022849 | 5    | NA   | 0.08 | 0.12 | 0.08 | 1    | 0.17 |
| chr16 | 36041197 | 36041718 | Wdr5b         | ENSMUSG00000034379 | 181  | NA   | 0.07 | 0.11 | 0.23 | 0.14 | 0.16 |
| chr16 | 44332093 | 44332858 | Sidt1         | ENSMUSG00000022696 | 179  | NA   | 0.2  | 0.17 | 0.22 | 0.2  | 0.22 |
| chr16 | 45408743 | 45408949 | Cd200         | ENSMUSG00000022661 | 131  | NA   | 1    | 1    | 1    | 0.45 | 0.5  |
| chr16 | 57231436 | 57231825 | Tbc1d23       | ENSMUSG00000022749 | -51  | NA   | NA   | 0.13 | 0.25 | 0.67 | 0.16 |
| chr16 | 60605974 | 60606344 | Gm9017        | ENSMUSG00000089685 | 578  | NA   | 0.36 | 0.15 | 0.24 | 0.25 | 0.1  |
| chr16 | 62853977 | 62854280 | Pros1         | ENSMUSG00000022912 | -5   | NA   | 0.06 | 0.05 | 0.08 | 0.04 | 0.07 |
| chr16 | 84774341 | 84774737 | Jam2          | ENSMUSG00000053062 | 171  | NA   | NA   | 0.06 | 0.15 | 1    | 0.1  |
| chr16 | 91561897 | 91562124 | Ifngr2        | ENSMUSG00000022965 | 442  | 1    | NA   | NA   | NA   | NA   | NA   |
| chr16 | 91660152 | 91660721 | Son           | ENSMUSG00000022961 | 248  | 1    | NA   | 1    | NA   | NA   | NA   |
| chr16 | 94086960 | 94087300 | Sim2          | ENSMUSG00000062713 | 1069 | NA   | NA   | 0.27 | NA   | NA   | 0.2  |
| chr16 | 94591876 | 94593240 | Pigp          | ENSMUSG00000022940 | -662 | NA   | 0.06 | 0.14 | 0.06 | 0.05 | 0.11 |
| chr17 | 12699810 | 12700392 | Slc22a3       | ENSMUSG00000023828 | 469  | 0.35 | 0.09 | 0.12 | 0.12 | 0.05 | 0.18 |
| chr17 | 35378297 | 35378877 | Ddx39b        | ENSMUSG00000019432 | -104 | 0.62 | 0.26 | 0.14 | 0.16 | 0.09 | 0.2  |
| chr17 | 8357896  | 8358747  | Fgfr1op       | ENSMUSG00000069135 | -45  | 0.48 | 0.24 | 0.2  | 0.25 | 0.17 | 0.3  |
| chr17 | 31773417 | 31774402 | Cbs           | ENSMUSG00000024039 | -315 | 0.29 | 0.11 | 0.18 | 0.2  | 0.1  | 0.19 |
| chr17 | 46520337 | 46521452 | Zfp318        | ENSMUSG00000015597 | 214  | 0.31 | 0.2  | 0.13 | 0.17 | 0.11 | 0.16 |
| chr17 | 28937606 | 28938779 | Brpf3         | ENSMUSG00000063952 | 157  | 0.28 | 0.16 | 0.11 | 0.11 | 0.1  | 0.14 |
| chr17 | 86566593 | 86568311 | Prkce         | ENSMUSG00000045038 | 327  | 0.25 | 0.13 | 0.11 | 0.17 | 0.1  | 0.18 |
| chr17 | 66728839 | 66729092 | 1110012J17Rik | ENSMUSG00000052105 | -694 | 0.75 | 0.91 | 0.93 | 0.96 | 0.97 | 0.96 |
| chr17 | 64949963 | 64951541 | Man2a1        | ENSMUSG00000024085 | 676  | 0.26 | 0.16 | 0.11 | 0.13 | 0.12 | 0.12 |
| chr17 | 4994039  | 4996845  | Arid1b        | ENSMUSG00000069729 | 1110 | 0.16 | 0.16 | 0.1  | 0.12 | 0.09 | 0.1  |
| chr17 | 80294372 | 80295663 | Atf2          | ENSMUSG00000059811 | 351  | 0.14 | 0.09 | 0.09 | 0.13 | 0.06 | 0.12 |
| chr17 | 31701172 | 31702566 | Pknox1        | ENSMUSG00000006705 | 175  | 0.21 | 0.1  | 0.13 | 0.16 | 0.1  | 0.13 |
| chr17 | 34020439 | 34020691 | Kifc1         | ENSMUSG00000079553 | -394 | 0.5  | 0.47 | 0.76 | 0.84 | 0.89 | 0.94 |
| chr17 | 26078701 | 26078978 | Pigq          | ENSMUSG00000025728 | -11  | 0.08 | 0.21 | 0.12 | 0.13 | 0.23 | 0.1  |

|       |          |          |               |                    |       |      |      |      |      |      |      |
|-------|----------|----------|---------------|--------------------|-------|------|------|------|------|------|------|
| chr17 | 46841635 | 46842189 | Ppp2r5d       | ENSMUSG00000059409 | 39    | 0.38 | 0.12 | 0.09 | 0.1  | 0.1  | 0.09 |
| chr17 | 15511604 | 15513749 | A930024N18Rik | ENSMUSG00000085544 | 712   | 0.22 | 0.19 | 0.12 | 0.14 | 0.11 | 0.15 |
| chr17 | 30141141 | 30142034 | Zfand3        | ENSMUSG00000044477 | -445  | 0.48 | 0.45 | 0.14 | 0.18 | 0.23 | 0.15 |
| chr17 | 36002669 | 36003013 | Ppp1r18       | ENSMUSG00000034595 | -160  | 1    | NA   | 0.09 | NA   | 0.06 | 0.09 |
| chr17 | 79234234 | 79235029 | Heatr5b       | ENSMUSG00000039414 | 69    | 0.48 | 0.19 | 0.1  | 0.19 | 0.11 | 0.13 |
| chr17 | 45569890 | 45571214 | Cdc5l         | ENSMUSG00000023932 | 104   | 0.23 | 0.18 | 0.12 | 0.17 | 0.13 | 0.15 |
| chr17 | 29405825 | 29406192 | BC004004      | ENSMUSG00000052712 | 112   | 0.33 | 0.24 | 0.09 | 0.18 | 0.08 | 0.16 |
| chr17 | 35332558 | 35333172 | Ltb           | ENSMUSG00000024399 | 1294  | 0.1  | 0.21 | 0.19 | 0.45 | 0.52 | 0.22 |
| chr17 | 35457562 | 35458199 | H2-Q1         | ENSMUSG00000079507 | 377   | 0.12 | 0.07 | 0.12 | 0.14 | 0.07 | 0.11 |
| chr17 | 25150640 | 25151387 | Cramp1l       | ENSMUSG00000038002 | -44   | 0.26 | 0.09 | 0.1  | 0.14 | 0.08 | 0.13 |
| chr17 | 7165186  | 7166033  | Tagap1        | ENSMUSG00000052031 | -104  | 0.67 | 0.07 | 0.08 | 0.25 | 0.07 | 0.15 |
| chr17 | 35399926 | 35401073 | H2-D1         | ENSMUSG00000073411 | 460   | 0.09 | 0.05 | 0.11 | 0.15 | 0.04 | 0.17 |
| chr17 | 51317959 | 51318906 | Tbc1d5        | ENSMUSG00000023923 | 77    | 0.31 | 0.29 | 0.11 | 0.17 | 0.12 | 0.13 |
| chr17 | 47766295 | 47766697 | Usp49         | ENSMUSG00000090115 | -1143 | 0.26 | 0.24 | 0.11 | 0.16 | 0.46 | 0.13 |
| chr17 | 21626045 | 21626261 | Gm17372       | ENSMUSG00000066035 | -314  | 1    | NA   | 0.12 | 0.07 | 0.04 | 0.07 |
| chr17 | 6475640  | 6476430  | Tmem181b-ps   | ENSMUSG00000079733 | 240   | 0.13 | NA   | 0.05 | 0.07 | 0.64 | 0.09 |
| chr17 | 74058940 | 74059924 | Galnt14       | ENSMUSG00000024064 | 323   | 0.62 | 0.36 | 0.11 | 0.17 | 0.22 | 0.15 |
| chr17 | 50432009 | 50433116 | Dazl          | ENSMUSG00000010592 | -345  | 0.61 | 0.4  | 0.4  | 0.45 | 0.46 | 0.43 |
| chr17 | 36407935 | 36408867 | Trim39        | ENSMUSG00000045409 | -73   | 0.12 | 0.09 | 0.1  | 0.11 | 0.25 | 0.13 |
| chr17 | 86088441 | 86088743 | Six2          | ENSMUSG00000024134 | -978  | 0.35 | 0.1  | 0.08 | 0.14 | 0.07 | 0.13 |
| chr17 | 15079938 | 15080942 | 1600012H06Rik | ENSMUSG00000050088 | 251   | 0.39 | 0.18 | 0.13 | 0.2  | 0.17 | 0.16 |
| chr17 | 74715324 | 74715953 | Dpy30         | ENSMUSG00000024067 | 96    | 0.3  | 0.13 | 0.16 | 0.2  | 0.06 | 0.12 |
| chr17 | 15663874 | 15664330 | Pdcd2         | ENSMUSG00000014771 | -152  | 0.41 | 0.15 | 0.11 | 0.15 | 0.19 | 0.19 |
| chr17 | 6987074  | 6987929  | Ezr           | ENSMUSG00000052397 | -368  | 0.32 | 0.21 | 0.13 | 0.12 | 0.13 | 0.17 |
| chr17 | 71532509 | 71533512 | Lpin2         | ENSMUSG00000024052 | 114   | 0.5  | 0.37 | 0.11 | 0.25 | 0.21 | 0.16 |
| chr17 | 46434799 | 46435602 | Dlk2          | ENSMUSG00000047428 | 323   | 0.89 | 0.29 | 0.17 | 0.31 | 0.23 | 0.19 |
| chr17 | 37125562 | 37125854 | H2-M5         | ENSMUSG00000024459 | 282   | 0.47 | 0.32 | 0.16 | 0.31 | 0.18 | 0.19 |
| chr17 | 25929016 | 25929502 | Fam173a       | ENSMUSG00000057411 | -30   | 0.8  | 0.44 | 0.15 | 0.17 | 0.17 | 0.21 |
| chr17 | 28465376 | 28466280 | Rpl10a        | ENSMUSG00000037805 | 412   | 0.16 | 0.15 | 0.08 | 0.21 | 0.05 | 0.16 |
| chr17 | 35107204 | 35109178 | Hspa1a        | ENSMUSG00000091971 | 878   | 0.93 | 1    | 0.53 | 0.59 | 0.32 | 0.44 |

|       |          |          |               |                    |       |      |      |      |      |      |      |
|-------|----------|----------|---------------|--------------------|-------|------|------|------|------|------|------|
| chr17 | 24625283 | 24626256 | Caskin1       | ENSMUSG00000033597 | 41    | 0.2  | 0.12 | 0.1  | 0.12 | 0.09 | 0.11 |
| chr17 | 15635060 | 15635380 | Psemb1        | ENSMUSG00000014769 | 20    | 0.92 | 0.33 | 0.1  | 0.15 | 0.28 | 0.14 |
| chr17 | 27340526 | 27341555 | Lemd2         | ENSMUSG00000044857 | 343   | 0.13 | 0.29 | 0.08 | 0.14 | 0.24 | 0.11 |
| chr17 | 35088929 | 35089520 | AC087117.2    | ENSMUSG00000092687 | -204  | 0.12 | 0.24 | 0.11 | 0.18 | 0.36 | 0.17 |
| chr17 | 29979028 | 29979320 | Mdga1         | ENSMUSG00000043557 | 192   | 0.51 | 0.33 | 0.84 | 0.75 | 0.26 | 0.53 |
| chr17 | 63229341 | 63232359 | Efna5         | ENSMUSG00000048915 | -357  | 0.15 | 0.14 | 0.09 | 0.13 | 0.09 | 0.13 |
| chr17 | 26088506 | 26089139 | D630044L22Rik | ENSMUSG00000086285 | 405   | 0.06 | 0.4  | 0.09 | 0.14 | 0.65 | 0.12 |
| chr17 | 3114402  | 3115694  | Scaf8         | ENSMUSG00000046201 | 76    | 0.35 | 0.13 | 0.11 | 0.13 | 0.16 | 0.11 |
| chr17 | 48548335 | 48549605 | Nfya          | ENSMUSG00000023994 | 43    | 0.19 | 0.18 | 0.1  | 0.14 | 0.09 | 0.15 |
| chr17 | 69766481 | 69767216 | C030034I22Rik | ENSMUSG00000073374 | 47    | 0.47 | 0.32 | 0.13 | 0.19 | 0.21 | 0.15 |
| chr17 | 29797432 | 29798008 | Ftsjd2        | ENSMUSG00000024019 | 180   | 0.6  | 0.11 | 0.07 | 0.1  | 0.06 | 0.09 |
| chr17 | 80112711 | 80113568 | Cyp1b1        | ENSMUSG00000024087 | 1242  | 0.27 | 0.14 | 0.16 | 0.22 | 0.11 | 0.16 |
| chr17 | 34168462 | 34169428 | Slc39a7       | ENSMUSG00000024327 | -456  | 0.26 | 0.15 | 0.11 | 0.15 | 0.13 | 0.16 |
| chr17 | 64212584 | 64213943 | A930002H24Rik | ENSMUSG00000045506 | -123  | 0.15 | 0.11 | 0.08 | 0.12 | 0.08 | 0.14 |
| chr17 | 25933226 | 25934155 | Metrn         | ENSMUSG00000002274 | 300   | 0.23 | 0.12 | 0.12 | 0.16 | 0.11 | 0.15 |
| chr17 | 35068107 | 35068463 | Neu1          | ENSMUSG0000007038  | 87    | 0.2  | 0.19 | 0.17 | 0.21 | 0.64 | 0.17 |
| chr17 | 51971085 | 51972570 | Satb1         | ENSMUSG00000023927 | -483  | 0.18 | 0.11 | 0.09 | 0.14 | 0.1  | 0.13 |
| chr17 | 75404880 | 75405809 | Ltbp1         | ENSMUSG0000001870  | 436   | 0.25 | 0.13 | 0.1  | 0.16 | 0.12 | 0.12 |
| chr17 | 70318365 | 70319228 | Dlgap1        | ENSMUSG00000003279 | 383   | 0.18 | 0.16 | 0.09 | 0.1  | 0.07 | 0.09 |
| chr17 | 24591988 | 24592388 | E4f1          | ENSMUSG00000024137 | 68    | 0.42 | 0.15 | 0.11 | 0.13 | 0.15 | 0.15 |
| chr17 | 29144607 | 29144899 | Stk38         | ENSMUSG00000024006 | -73   | 0.71 | 0.27 | 0.08 | 0.14 | 0.17 | 0.17 |
| chr17 | 15673460 | 15673827 | Gm7177        | ENSMUSG00000091229 | -1075 | 1    | 0.31 | 0.17 | 0.42 | 0.1  | 0.25 |
| chr17 | 25031833 | 25032438 | Eme2          | ENSMUSG00000073436 | -165  | 0.3  | 0.11 | 0.11 | 0.12 | 0.1  | 0.15 |
| chr17 | 34808107 | 34809700 | Tnxb          | ENSMUSG00000033327 | 1423  | 0.13 | 0.2  | 0.14 | 0.17 | 0.21 | 0.2  |
| chr17 | 66233503 | 66234532 | Ralbp1        | ENSMUSG00000024096 | 148   | 0.19 | 0.1  | 0.09 | 0.12 | 0.1  | 0.1  |
| chr17 | 73185943 | 73187037 | Ypel5         | ENSMUSG00000039770 | 446   | 0.27 | 0.2  | 0.11 | 0.15 | 0.14 | 0.12 |
| chr17 | 28622442 | 28622893 | Fkbp5         | ENSMUSG00000024222 | 427   | 0.15 | 0.17 | 0.09 | 0.12 | 0.08 | 0.15 |
| chr17 | 57074474 | 57075289 | Mllt1         | ENSMUSG00000024212 | -45   | 0.14 | 0.12 | 0.09 | 0.12 | 0.07 | 0.14 |
| chr17 | 35094286 | 35096260 | Hspa1b        | ENSMUSG00000090877 | 908   | 1    | 0.44 | 0.21 | 0.46 | 0.42 | 0.49 |
| chr17 | 68353224 | 68353675 | Arhgap28      | ENSMUSG00000024043 | -1    | 0.37 | 0.35 | 0.16 | 0.14 | 0.12 | 0.23 |

|       |          |          |               |                    |       |      |      |      |      |      |      |
|-------|----------|----------|---------------|--------------------|-------|------|------|------|------|------|------|
| chr17 | 5492094  | 5493333  | Zdhhc14       | ENSMUSG00000034265 | 113   | 0.14 | 0.12 | 0.1  | 0.16 | 0.08 | 0.13 |
| chr17 | 53618325 | 53619267 | Rab5a         | ENSMUSG00000017831 | 237   | 0.17 | 0.1  | 0.1  | 0.13 | 0.09 | 0.13 |
| chr17 | 34742573 | 34743066 | Agpat1        | ENSMUSG00000034254 | 13    | 0.29 | 0.29 | 0.09 | 0.11 | 0.05 | 0.2  |
| chr17 | 71965392 | 71966338 | Wdr43         | ENSMUSG00000041057 | 310   | 0.25 | 0.11 | 0.09 | 0.11 | 0.14 | 0.12 |
| chr17 | 30712566 | 30713587 | Btbd9         | ENSMUSG00000062202 | 156   | 0.33 | 0.14 | 0.07 | 0.14 | 0.12 | 0.17 |
| chr17 | 24986751 | 24987797 | Fahd1         | ENSMUSG00000045316 | -27   | 0.15 | 0.15 | 0.09 | 0.12 | 0.07 | 0.09 |
| chr17 | 57170556 | 57171350 | Khsrp         | ENSMUSG00000007670 | -23   | 0.44 | 0.21 | 0.09 | 0.14 | 0.17 | 0.21 |
| chr17 | 25969476 | 25970621 | Stub1         | ENSMUSG00000039615 | 258   | 0.26 | 0.3  | 0.13 | 0.18 | 0.11 | 0.16 |
| chr17 | 34769004 | 34769346 | Prrt1         | ENSMUSG00000015476 | 826   | 0.29 | 0.25 | 0.12 | 0.19 | 0.08 | 0.17 |
| chr17 | 36342859 | 36343170 | Gm8835        | ENSMUSG00000092457 | 254   | 0.3  | 0.3  | 0.14 | 0.16 | 0.09 | 0.12 |
| chr17 | 35837354 | 35837941 | Ddr1          | ENSMUSG00000003534 | -150  | 0.23 | 0.11 | 0.08 | 0.09 | 0.12 | 0.21 |
| chr17 | 80878829 | 80879984 | Sos1          | ENSMUSG00000024241 | 387   | 0.15 | 0.1  | 0.1  | 0.11 | 0.09 | 0.11 |
| chr17 | 24607077 | 24608328 | Pgp           | ENSMUSG00000043445 | 284   | 0.16 | 0.1  | 0.1  | 0.14 | 0.1  | 0.12 |
| chr17 | 35479281 | 35480194 | H2-Q2         | ENSMUSG00000091705 | 550   | 0.18 | 0.14 | 0.08 | 0.19 | 0.07 | 0.12 |
| chr17 | 26551503 | 26552511 | Neur1b        | ENSMUSG00000034413 | 97    | 0.2  | 0.23 | 0.15 | 0.14 | 0.13 | 0.16 |
| chr17 | 36046856 | 36047080 | Atat1         | ENSMUSG00000024426 | -14   | 0.32 | 0.58 | 0.17 | 0.13 | 0.17 | 0.09 |
| chr17 | 27648868 | 27650780 | Grm4          | ENSMUSG00000063239 | 462   | 0.19 | 0.21 | 0.14 | 0.16 | 0.12 | 0.15 |
| chr17 | 35301436 | 35302348 | Prrc2a        | ENSMUSG00000024393 | -112  | 0.39 | 0.38 | 0.17 | 0.25 | 0.28 | 0.22 |
| chr17 | 47277219 | 47277560 | Tref1         | ENSMUSG00000064043 | -502  | 0.86 | 0.56 | 0.37 | 0.53 | 0.31 | 0.37 |
| chr17 | 46848259 | 46849256 | Pex6          | ENSMUSG00000002763 | 345   | 0.07 | 0.11 | 0.12 | 0.14 | 0.11 | 0.15 |
| chr17 | 43153443 | 43154609 | Tnfrsf21      | ENSMUSG00000023915 | 522   | 0.25 | 0.25 | 0.11 | 0.16 | 0.15 | 0.16 |
| chr17 | 86565779 | 86566179 | Prkce         | ENSMUSG00000045038 | -1146 | 0.19 | 0.1  | 0.14 | 0.2  | 0.09 | 0.13 |
| chr17 | 87362217 | 87363092 | Rhoq          | ENSMUSG00000024143 | 232   | 0.41 | 0.2  | 0.11 | 0.14 | 0.24 | 0.17 |
| chr17 | 26389772 | 26390545 | Luc7l         | ENSMUSG00000024188 | 303   | 0.24 | 0.19 | 0.1  | 0.15 | 0.04 | 0.16 |
| chr17 | 29089113 | 29089712 | Kctd20        | ENSMUSG00000005936 | 31    | 0.06 | 0.27 | 0.1  | 0.11 | 0.16 | 0.14 |
| chr17 | 46909788 | 46910086 | 2310039H08Rik | ENSMUSG00000062619 | 353   | 0.57 | 0.55 | 0.2  | 0.57 | 0.27 | 0.24 |
| chr17 | 46247874 | 46248262 | Mrps18a       | ENSMUSG00000023967 | 133   | 0.5  | 0.33 | 0.13 | 0.09 | 0.06 | 0.2  |
| chr17 | 25152199 | 25153807 | Ift140        | ENSMUSG00000024169 | -33   | 0.42 | 0.48 | 0.16 | 0.23 | 0.24 | 0.17 |
| chr17 | 34164586 | 34165134 | H2-Ke6        | ENSMUSG00000073422 | -52   | 0.3  | 0.13 | 0.11 | 0.14 | 0.08 | 0.16 |
| chr17 | 45643720 | 45644067 | Aars2         | ENSMUSG00000023938 | 103   | 0.17 | 0.15 | 0.08 | 0.14 | 0.06 | 0.16 |

|       |          |          |               |                     |      |      |      |      |      |      |      |
|-------|----------|----------|---------------|---------------------|------|------|------|------|------|------|------|
| chr17 | 84030294 | 84031285 | Kcng3         | ENSMUSG00000045053  | 446  | 0.2  | 0.14 | 0.1  | 0.15 | 0.14 | 0.13 |
| chr17 | 56175694 | 56176268 | Sh3gl1        | ENSMUSG00000003200  | 77   | 0.17 | 0.57 | 0.09 | 0.18 | 0.38 | 0.19 |
| chr17 | 42453048 | 42453804 | 3110082D06Rik | ENSMUSG000000042256 | 530  | 0.3  | 0.19 | 0.12 | 0.11 | 0.12 | 0.18 |
| chr17 | 17760830 | 17762511 | Lnpep         | ENSMUSG000000023845 | -217 | 0.21 | 0.15 | 0.11 | 0.16 | 0.13 | 0.15 |
| chr17 | 35516491 | 35517595 | H2-Q4         | ENSMUSG000000035929 | 481  | 0.12 | 0.09 | 0.11 | 0.18 | 0.07 | 0.13 |
| chr17 | 29484391 | 29484962 | Mtch1         | ENSMUSG000000024012 | 28   | 0.47 | 0.25 | 0.14 | 0.17 | 0.22 | 0.15 |
| chr17 | 23863179 | 23863838 | Pkmyt1        | ENSMUSG000000023908 | 205  | 0.13 | 0.1  | 0.1  | 0.13 | 0.07 | 0.16 |
| chr17 | 65961957 | 65963377 | Vapa          | ENSMUSG000000024091 | 228  | 0.16 | 0.18 | 0.08 | 0.13 | 0.08 | 0.11 |
| chr17 | 46384805 | 46385464 | Polr1c        | ENSMUSG000000067148 | -253 | 0.13 | 0.15 | 0.13 | 0.2  | 0.22 | 0.12 |
| chr17 | 56856031 | 56857503 | Vmac          | ENSMUSG000000054723 | -423 | 0.12 | 0.14 | 0.07 | 0.12 | 0.06 | 0.13 |
| chr17 | 28828055 | 28829539 | Mapk14        | ENSMUSG000000053436 | 510  | 0.14 | 0.08 | 0.08 | 0.14 | 0.08 | 0.14 |
| chr17 | 87506436 | 87507652 | Socs5         | ENSMUSG000000037104 | 25   | 0.13 | 0.17 | 0.1  | 0.12 | 0.08 | 0.14 |
| chr17 | 88929228 | 88929490 | Klraq1        | ENSMUSG000000034709 | -105 | 0.18 | 0.12 | 0.07 | 0.11 | 0.06 | 0.12 |
| chr17 | 12511077 | 12511792 | Map3k4        | ENSMUSG000000014426 | 180  | 0.17 | 0.21 | 0.11 | 0.11 | 0.09 | 0.08 |
| chr17 | 69506013 | 69506886 | Epb4.1l3      | ENSMUSG000000024044 | 299  | 0.19 | 0.16 | 0.11 | 0.13 | 0.12 | 0.14 |
| chr17 | 84865085 | 84865686 | Thada         | ENSMUSG000000024251 | 151  | 0.2  | 0.09 | 0.09 | 0.2  | 0.08 | 0.14 |
| chr17 | 71824088 | 71825313 | Smchd1        | ENSMUSG000000024054 | -17  | 0.23 | 0.17 | 0.11 | 0.16 | 0.13 | 0.13 |
| chr17 | 34783957 | 34784591 | Atf6b         | ENSMUSG000000015461 | 183  | 0.23 | 0.12 | 0.09 | 0.18 | 0.14 | 0.15 |
| chr17 | 56601187 | 56601936 | Ptprs         | ENSMUSG000000013236 | 78   | 0.27 | 0.21 | 0.08 | 0.14 | 0.13 | 0.2  |
| chr17 | 66460868 | 66461141 | ORF19         | ENSMUSG000000024101 | 118  | 0.38 | 0.36 | 0.14 | 0.17 | 0.18 | 0.15 |
| chr17 | 46624159 | 46624630 | Ttbk1         | ENSMUSG000000015599 | 230  | 0.17 | 0.18 | 0.09 | 0.13 | 0.1  | 0.09 |
| chr17 | 37139590 | 37139951 | Zfp57         | ENSMUSG000000036036 | 155  | 0.31 | 0.31 | 0.15 | 0.19 | 0.12 | 0.14 |
| chr17 | 37183048 | 37183613 | Gabbr1        | ENSMUSG000000024462 | 186  | 0.54 | 0.65 | 0.23 | 0.21 | 0.32 | 0.2  |
| chr17 | 80772433 | 80773355 | Gm10190       | ENSMUSG000000066938 | -13  | 0.08 | 0.09 | 0.12 | 0.14 | 0.11 | 0.17 |
| chr17 | 24889495 | 24890474 | Hs3st6        | ENSMUSG000000039628 | 51   | 0.2  | 0.11 | 0.13 | 0.14 | 0.09 | 0.18 |
| chr17 | 27609852 | 27610095 | Grm4          | ENSMUSG000000063239 | 39   | 0.78 | 0.63 | 0.87 | 0.9  | 0.9  | 0.81 |
| chr17 | 27085613 | 27085818 | Mir3083       | ENSMUSG000000093118 | -651 | 0.06 | 0.13 | 0.1  | 0.15 | 0.14 | 0.14 |
| chr17 | 24806456 | 24807092 | Zfp598        | ENSMUSG000000041130 | 77   | 0.21 | 0.12 | 0.08 | 0.11 | 0.13 | 0.11 |
| chr17 | 36053030 | 36054100 | Mrps18b       | ENSMUSG000000024436 | -417 | 0.1  | 0.22 | 0.09 | 0.16 | 0.22 | 0.14 |
| chr17 | 85489882 | 85490321 | 1700106N22Rik | ENSMUSG000000071037 | 155  | 0.15 | 0.14 | 0.11 | 0.11 | 0.07 | 0.16 |

|       |          |          |               |                    |      |      |      |      |      |      |      |
|-------|----------|----------|---------------|--------------------|------|------|------|------|------|------|------|
| chr17 | 66868373 | 66869252 | Rab12         | ENSMUSG00000023460 | -95  | 0.19 | 0.25 | 0.11 | 0.13 | 0.12 | 0.21 |
| chr17 | 87681797 | 87682872 | 4833418N02Rik | ENSMUSG00000085287 | -494 | 0.13 | 0.21 | 0.12 | 0.14 | 0.09 | 0.13 |
| chr17 | 24345710 | 24346267 | BC028777      | ENSMUSG00000085185 | 182  | 0.22 | 0.27 | 0.1  | 0.21 | 0.12 | 0.19 |
| chr17 | 24306019 | 24306727 | Atp6v0c       | ENSMUSG00000024121 | 33   | 0.22 | 0.21 | 0.11 | 0.15 | 0.11 | 0.15 |
| chr17 | 13184604 | 13185763 | Wtap          | ENSMUSG00000060475 | -125 | 0.17 | 0.11 | 0.1  | 0.17 | 0.11 | 0.15 |
| chr17 | 71659796 | 71660617 | Emilin2       | ENSMUSG00000024053 | 99   | 0.2  | 0.1  | 0.09 | 0.15 | 0.1  | 0.1  |
| chr17 | 36220163 | 36221164 | H2-BI         | ENSMUSG00000073406 | 475  | 0.16 | 0.13 | 0.12 | 0.2  | 0.08 | 0.13 |
| chr17 | 79135570 | 79136415 | Strn          | ENSMUSG00000024077 | 544  | 0.11 | 0.11 | 0.07 | 0.12 | 0.08 | 0.16 |
| chr17 | 46888868 | 46889286 | Cnpy3         | ENSMUSG00000023973 | 49   | 0.11 | 0.3  | 0.09 | 0.12 | 0.36 | 0.12 |
| chr17 | 57201467 | 57202278 | Crb3          | ENSMUSG00000044279 | 248  | 0.35 | 0.3  | 0.15 | 0.16 | 0.22 | 0.13 |
| chr17 | 35263116 | 35263484 | D17H6S53E     | ENSMUSG00000043311 | -18  | 0.33 | NA   | 0.08 | 0.17 | 0.06 | 0.08 |
| chr17 | 8993622  | 8995291  | Pde10a        | ENSMUSG00000023868 | -102 | 0.19 | 0.23 | 0.11 | 0.16 | 0.14 | 0.17 |
| chr17 | 8503891  | 8504318  | 4930506C21Rik | ENSMUSG00000087478 | -187 | 0.3  | 0.19 | 0.12 | 0.16 | 0.11 | 0.13 |
| chr17 | 24615639 | 24616165 | Mist8         | ENSMUSG00000024142 | 121  | 0.22 | 0.12 | 0.07 | 0.15 | 0.09 | 0.1  |
| chr17 | 3557391  | 3557765  | Tfb1m         | ENSMUSG00000036983 | 135  | 0.27 | 0.1  | 0.14 | 0.13 | 0.07 | 0.21 |
| chr17 | 7032139  | 7032670  | Gm2885        | ENSMUSG00000091711 | -65  | 0.44 | 0.55 | 0.1  | 0.19 | 0.16 | 0.13 |
| chr17 | 8340448  | 8341062  | Rnaset2a      | ENSMUSG00000073469 | -58  | 0.45 | 0.21 | 0.17 | 0.12 | 0.3  | 0.08 |
| chr17 | 24563532 | 24563961 | Eci1          | ENSMUSG00000024132 | 118  | 0.38 | 0.12 | 0.11 | 0.15 | 0.16 | 0.11 |
| chr17 | 28758348 | 28759619 | Srpk1         | ENSMUSG0000004865  | 413  | 0.09 | 0.28 | 0.11 | 0.18 | 0.13 | 0.16 |
| chr17 | 34973252 | 34974632 | Stk19         | ENSMUSG00000061207 | -532 | 0.2  | 0.12 | 0.12 | 0.16 | 0.14 | 0.18 |
| chr17 | 41071373 | 41071757 | Mut           | ENSMUSG00000023921 | -91  | 0.08 | 0.34 | 0.12 | 0.16 | 0.14 | 0.16 |
| chr17 | 70865508 | 70865793 | Dlgap1        | ENSMUSG00000003279 | 288  | 0.92 | 0.83 | 0.97 | 0.94 | 0.77 | 0.95 |
| chr17 | 88071699 | 88072329 | Msh2          | ENSMUSG00000024151 | 134  | 0.21 | 0.13 | 0.1  | 0.12 | 0.13 | 0.15 |
| chr17 | 25376824 | 25377539 | Gnptg         | ENSMUSG00000035521 | -120 | 0.33 | 0.2  | 0.13 | 0.11 | 0.1  | 0.19 |
| chr17 | 25409868 | 25410848 | Ube2i         | ENSMUSG00000015120 | -258 | 0.3  | 0.25 | 0.12 | 0.13 | 0.19 | 0.15 |
| chr17 | 25569600 | 25571314 | Cacna1h       | ENSMUSG00000024112 | -344 | 0.17 | 0.15 | 0.08 | 0.14 | 0.12 | 0.12 |
| chr17 | 47146890 | 47147482 | Ubr2          | ENSMUSG00000023977 | 295  | 0.16 | 0.09 | 0.09 | 0.17 | 0.1  | 0.11 |
| chr17 | 14416458 | 14416823 | Smoc2         | ENSMUSG00000023886 | 127  | 0.19 | 0.16 | 0.07 | 0.16 | 0.11 | 0.1  |
| chr17 | 33954253 | 33955284 | Kank3         | ENSMUSG00000042099 | 1638 | 0.1  | 0.1  | 0.08 | 0.17 | 0.06 | 0.11 |
| chr17 | 44242408 | 44242962 | Enpp4         | ENSMUSG00000023961 | 28   | 0.11 | 0.06 | 0.07 | 0.15 | 0.06 | 0.19 |

|       |          |          |             |                     |      |      |      |      |      |      |      |
|-------|----------|----------|-------------|---------------------|------|------|------|------|------|------|------|
| chr17 | 57150407 | 57151229 | Gtf2f1      | ENSMUSG00000002658  | -96  | 1    | 0.2  | 0.19 | 0.15 | 0.07 | 0.12 |
| chr17 | 87845448 | 87846746 | Calm2       | ENSMUSG000000036438 | 91   | 0.12 | 0.17 | 0.08 | 0.14 | 0.06 | 0.11 |
| chr17 | 15636757 | 15637290 | Tbp         | ENSMUSG000000014767 | 171  | 0.38 | 0.41 | 0.16 | 0.17 | 0.21 | 0.13 |
| chr17 | 24342239 | 24343916 | Tbc1d24     | ENSMUSG000000036473 | -570 | 0.24 | 0.12 | 0.13 | 0.21 | 0.17 | 0.18 |
| chr17 | 24786785 | 24787232 | Slc9a3r2    | ENSMUSG000000002504 | 226  | 0.18 | 0.24 | 0.07 | 0.15 | 0.08 | 0.1  |
| chr17 | 49071042 | 49071641 | Lrfn2       | ENSMUSG000000040490 | -363 | 0.24 | 0.09 | 0.1  | 0.1  | 0.07 | 0.14 |
| chr17 | 73457201 | 73457828 | Lclat1      | ENSMUSG000000054469 | 189  | 0.13 | 0.38 | 0.14 | 0.2  | 0.2  | 0.22 |
| chr17 | 78599057 | 78599351 | Crim1       | ENSMUSG000000024074 | -384 | 0.34 | 0.36 | 0.2  | 0.25 | 0.42 | 0.15 |
| chr17 | 83750137 | 83750748 | Eml4        | ENSMUSG000000032624 | 171  | 0.17 | 0.25 | 0.07 | 0.16 | 0.1  | 0.13 |
| chr17 | 25023103 | 25024048 | Nubp2       | ENSMUSG000000039183 | -280 | 0.28 | 0.09 | 0.15 | 0.23 | 0.17 | 0.12 |
| chr17 | 26250422 | 26250767 | Tmem8       | ENSMUSG000000024180 | 333  | 0.33 | NA   | 0.14 | 0.13 | 0.63 | 0.12 |
| chr17 | 36385817 | 36386127 | Gm4252      | ENSMUSG000000092502 | -79  | 0.62 | 0.33 | 0.34 | 1    | 0.49 | 0.31 |
| chr17 | 56615115 | 56616050 | Ptprs       | ENSMUSG000000013236 | 210  | 0.1  | 0.13 | 0.09 | 0.12 | 0.15 | 0.11 |
| chr17 | 75950834 | 75951346 | Fam98a      | ENSMUSG000000002017 | 46   | 0.16 | 0.2  | 0.1  | 0.17 | 0.1  | 0.11 |
| chr17 | 79451533 | 79452127 | Qpct        | ENSMUSG000000024084 | 584  | 0.55 | NA   | 0.61 | 1    | 0.2  | 1    |
| chr17 | 23965623 | 23965999 | Tceb2       | ENSMUSG000000055839 | 147  | 0.12 | 0.2  | 0.1  | 0.12 | 0.06 | 0.1  |
| chr17 | 24488622 | 24489544 | Abca3       | ENSMUSG000000024130 | 188  | 0.07 | 0.43 | 0.12 | 0.17 | 0.18 | 0.17 |
| chr17 | 86020844 | 86021407 | Six3        | ENSMUSG000000038805 | 754  | 0.11 | 0.1  | 0.11 | 0.11 | 0.07 | 0.1  |
| chr17 | 32924800 | 32925079 | Zfp871      | ENSMUSG000000024298 | 256  | 0.4  | 0.3  | 0.1  | 0.11 | 0.1  | 0.09 |
| chr17 | 35137771 | 35138563 | D17H6S56E-5 | ENSMUSG000000091747 | -266 | 0.13 | 0.1  | 0.09 | 0.12 | 0.1  | 0.17 |
| chr17 | 56323114 | 56323509 | D17Wsu104e  | ENSMUSG000000019579 | -39  | 0.37 | 0.3  | 0.13 | 0.15 | 0.21 | 0.17 |
| chr17 | 57386811 | 57387142 | Gpr108      | ENSMUSG000000005823 | 106  | 0.12 | 0.1  | 0.07 | 0.15 | 0.04 | 0.14 |
| chr17 | 88196301 | 88198170 | Kcnk12      | ENSMUSG000000050138 | 99   | 0.23 | 0.29 | 0.1  | 0.19 | 0.18 | 0.15 |
| chr17 | 13108518 | 13109734 | Tcp1        | ENSMUSG000000068039 | 559  | 0.14 | 0.12 | 0.11 | 0.16 | 0.2  | 0.15 |
| chr17 | 25392847 | 25393217 | Baiap3      | ENSMUSG000000047507 | 277  | 0.12 | 1    | 0.07 | 0.16 | 0.5  | 0.21 |
| chr17 | 28216705 | 28217216 | Tcp11       | ENSMUSG000000062859 | 292  | 0.12 | 0.11 | 0.09 | 0.17 | 0.07 | 0.13 |
| chr17 | 83614831 | 83615062 | Pkdcc       | ENSMUSG000000024247 | 140  | 0.18 | 0.08 | 0.08 | 0.17 | 0.1  | 0.15 |
| chr17 | 3084325  | 3084952  | Pisd-ps2    | ENSMUSG000000023795 | -455 | 1    | 0.12 | 0.14 | 0.23 | 0.1  | 0.37 |
| chr17 | 8533428  | 8534759  | Prr18       | ENSMUSG000000055945 | 489  | 0.13 | 0.21 | 0.08 | 0.15 | 0.09 | 0.13 |
| chr17 | 32420895 | 32421775 | Brd4        | ENSMUSG000000024002 | -293 | 0.13 | 0.18 | 0.08 | 0.12 | 0.1  | 0.15 |



|       |          |          |               |                    |      |      |      |      |      |      |      |
|-------|----------|----------|---------------|--------------------|------|------|------|------|------|------|------|
| chr17 | 34066137 | 34067498 | Rgl2          | ENSMUSG00000041354 | 329  | 0.15 | 0.12 | 0.09 | 0.16 | 0.11 | 0.12 |
| chr17 | 69788490 | 69789459 | A930029G22Rik | ENSMUSG00000085144 | -330 | 0.13 | 0.15 | 0.1  | 0.13 | 0.08 | 0.11 |
| chr17 | 71339500 | 71340261 | Myl12b        | ENSMUSG00000034868 | -10  | 0.14 | 0.26 | 0.08 | 0.12 | 0.1  | 0.12 |
| chr17 | 26917929 | 26918406 | Bnip1         | ENSMUSG00000024191 | 143  | 1    | 0.42 | 0.09 | 0.16 | 0.1  | 0.16 |
| chr17 | 48073139 | 48073437 | Gm5228        | ENSMUSG00000084288 | 249  | 0.74 | 0.63 | 0.2  | NA   | 0.91 | 0.66 |
| chr17 | 56098439 | 56098828 | Ccdc94        | ENSMUSG00000003208 | 23   | 0.67 | 0.15 | 0.09 | 0.13 | 0.2  | 0.19 |
| chr17 | 28045873 | 28046955 | Taf11         | ENSMUSG00000024218 | -227 | 0.09 | 0.07 | 0.07 | 0.15 | 0.06 | 0.15 |
| chr17 | 34136201 | 34137343 | H2-K1         | ENSMUSG00000061232 | -353 | 0.15 | 0.15 | 0.09 | 0.14 | 0.19 | 0.15 |
| chr17 | 35226089 | 35226660 | Abhd16a       | ENSMUSG00000007036 | 166  | 0.13 | 0.16 | 0.07 | 0.15 | 0.08 | 0.08 |
| chr17 | 56084396 | 56084645 | Zfp119b       | ENSMUSG00000062101 | 77   | 1    | 0.52 | 0.2  | 0.26 | 0.61 | 0.24 |
| chr17 | 9862196  | 9862426  | Pabpc6        | ENSMUSG00000046173 | 258  | 0.92 | 0.96 | 0.96 | 0.91 | 0.98 | 0.95 |
| chr17 | 23939785 | 23940965 | Srrm2         | ENSMUSG00000039218 | 221  | 0.09 | 0.18 | 0.1  | 0.13 | 0.15 | 0.15 |
| chr17 | 25945541 | 25946661 | Fbxl16        | ENSMUSG00000025738 | 71   | 0.13 | 0.12 | 0.08 | 0.17 | 0.1  | 0.14 |
| chr17 | 50648012 | 50649334 | Plcl2         | ENSMUSG00000038910 | -199 | 0.12 | 0.14 | 0.07 | 0.13 | 0.16 | 0.11 |
| chr17 | 29374384 | 29375415 | Cpne5         | ENSMUSG00000024008 | -242 | 0.35 | 0.17 | 0.1  | 0.15 | 0.5  | 0.16 |
| chr17 | 11033032 | 11033700 | Pacrg         | ENSMUSG00000037196 | -189 | 0.25 | NA   | 0.12 | 0.21 | 0.09 | 0.13 |
| chr17 | 36973871 | 36974392 | Trim26        | ENSMUSG00000024457 | 52   | 0.14 | 0.15 | 0.1  | 0.15 | 0.08 | 0.15 |
| chr17 | 67702732 | 67704375 | Ptprm         | ENSMUSG00000033278 | -140 | 0.23 | 0.14 | 0.11 | 0.17 | 0.19 | 0.15 |
| chr17 | 80689333 | 80689844 | Morn2         | ENSMUSG00000045257 | 36   | 0.12 | 0.07 | 0.11 | 0.08 | 0.05 | 0.14 |
| chr17 | 27069870 | 27070416 | Phf1          | ENSMUSG00000024193 | 71   | 0.25 | 0.52 | 0.12 | 0.27 | 0.17 | 0.11 |
| chr17 | 78817029 | 78817516 | Fez2          | ENSMUSG00000056121 | 173  | 0.12 | 0.33 | 0.07 | 0.14 | 0.17 | 0.09 |
| chr17 | 25854339 | 25854627 | Gng13         | ENSMUSG00000025739 | 10   | 0.25 | 0.15 | 0.31 | 0.16 | 0.11 | 0.15 |
| chr17 | 35371910 | 35372153 | Atp6v1g2      | ENSMUSG00000024403 | -2   | 0.06 | 0.26 | 0.1  | 0.14 | 0.21 | 0.09 |
| chr17 | 37187578 | 37188147 | Gabbr1        | ENSMUSG00000024462 | 243  | 0.18 | 0.12 | 0.11 | 0.16 | 0.1  | 0.13 |
| chr17 | 66300054 | 66300686 | Twsg1         | ENSMUSG00000024098 | 157  | 0.2  | 0.3  | 0.11 | 0.19 | 0.17 | 0.12 |
| chr17 | 15962438 | 15963805 | Rgmb          | ENSMUSG00000048027 | 429  | 0.24 | 0.15 | 0.1  | 0.19 | 0.19 | 0.14 |
| chr17 | 26249998 | 26250276 | Tmem8         | ENSMUSG00000024180 | -124 | 0.17 | 0.5  | 0.08 | 0.1  | 0.11 | 0.09 |
| chr17 | 31648903 | 31649345 | Wdr4          | ENSMUSG00000024037 | 89   | 0.09 | 0.1  | 0.13 | 0.15 | 0.12 | 0.13 |
| chr17 | 34077135 | 34078230 | H2-Ke2        | ENSMUSG00000024309 | -433 | 0.12 | 0.34 | 0.1  | 0.18 | 0.2  | 0.17 |
| chr17 | 57198782 | 57200197 | Slc25a23      | ENSMUSG00000046329 | -247 | 0.14 | 0.08 | 0.07 | 0.14 | 0.07 | 0.15 |

|       |          |          |               |                    |      |      |      |      |      |      |      |
|-------|----------|----------|---------------|--------------------|------|------|------|------|------|------|------|
| chr17 | 72953462 | 72954140 | Alk           | ENSMUSG00000055471 | -752 | 0.25 | 0.41 | 0.13 | 0.26 | 0.06 | 0.24 |
| chr17 | 46167334 | 46169459 | Vegfa         | ENSMUSG00000023951 | -91  | 0.1  | 0.12 | 0.13 | 0.15 | 0.14 | 0.18 |
| chr17 | 56765839 | 56766394 | Lonp1         | ENSMUSG00000041168 | 191  | 0.2  | 0.13 | 0.07 | 0.11 | 0.11 | 0.08 |
| chr17 | 79753761 | 79755329 | Gm17315       | ENSMUSG00000091839 | 506  | 0.12 | 0.1  | 0.13 | 0.15 | 0.08 | 0.14 |
| chr17 | 83614036 | 83614388 | Pkdcc         | ENSMUSG00000024247 | -411 | 0.05 | 0.14 | 0.11 | 0.16 | 0.12 | 0.13 |
| chr17 | 85189623 | 85190360 | Lrpprc        | ENSMUSG00000024120 | -93  | 1    | 0.62 | 0.19 | 0.28 | 0.13 | 0.3  |
| chr17 | 56752719 | 56753621 | Rpl36         | ENSMUSG00000057863 | 352  | 0.13 | 0.15 | 0.09 | 0.15 | 0.09 | 0.11 |
| chr17 | 23908072 | 23908662 | Flywch1       | ENSMUSG00000040097 | 191  | 1    | 0.3  | 0.2  | 0.21 | 0.15 | 0.16 |
| chr17 | 53828318 | 53828737 | Sgol1         | ENSMUSG00000023940 | 76   | 0.1  | 0.1  | 0.11 | 0.12 | 0.08 | 0.14 |
| chr17 | 34728931 | 34729658 | Pbx2          | ENSMUSG00000034673 | 86   | 0.29 | 0.22 | 0.11 | 0.13 | 0.23 | 0.18 |
| chr17 | 56896309 | 56897088 | Nrtn          | ENSMUSG00000039481 | 255  | 0.12 | 0.08 | 0.1  | 0.11 | 0.1  | 0.13 |
| chr17 | 66797776 | 66799236 | 1110012J17Rik | ENSMUSG00000052105 | 584  | 0.1  | 0.16 | 0.09 | 0.14 | 0.11 | 0.16 |
| chr17 | 36016585 | 36017110 | Dhx16         | ENSMUSG00000024422 | 83   | 0.07 | 0.19 | 0.07 | 0.14 | 0.1  | 0.12 |
| chr17 | 37333945 | 37334577 | Olf94         | ENSMUSG00000043827 | 695  | 0.33 | NA   | 0.14 | 0.44 | 0.8  | 0.08 |
| chr17 | 43013099 | 43013767 | Cd2ap         | ENSMUSG00000061665 | -60  | 0.12 | 0.15 | 0.08 | 0.11 | 0.09 | 0.13 |
| chr17 | 79335988 | 79336607 | Cebpz         | ENSMUSG00000024081 | 113  | 0.3  | 0.5  | 0.1  | 0.14 | 0.14 | 0.11 |
| chr17 | 14339993 | 14340920 | Dact2         | ENSMUSG00000048826 | 382  | 0.11 | 0.08 | 0.09 | 0.15 | 0.06 | 0.15 |
| chr17 | 26122147 | 26123041 | Solh          | ENSMUSG00000037326 | 147  | 0.13 | 0.1  | 0.08 | 0.13 | 0.1  | 0.13 |
| chr17 | 56218715 | 56219297 | Hdgfrp2       | ENSMUSG0000002833  | -51  | 0.67 | 0.58 | 0.21 | 0.45 | 0.25 | 0.21 |
| chr17 | 28826586 | 28826810 | Slc26a8       | ENSMUSG00000036196 | 234  | 0.23 | 0.1  | 0.12 | 0.27 | 0.15 | 0.13 |
| chr17 | 30023849 | 30025386 | Mdga1         | ENSMUSG00000043557 | -190 | 0.1  | 0.17 | 0.08 | 0.11 | 0.07 | 0.13 |
| chr17 | 31194542 | 31194963 | Abcg1         | ENSMUSG00000024030 | 109  | 0.15 | 1    | 0.09 | 0.31 | 0.22 | 0.15 |
| chr17 | 56148493 | 56149030 | Mpnd          | ENSMUSG00000003199 | 137  | 0.1  | 0.15 | 0.09 | 0.19 | 0.14 | 0.13 |
| chr17 | 25325132 | 25325981 | Unkl          | ENSMUSG00000015127 | 214  | 0.16 | 0.16 | 0.1  | 0.16 | 0.12 | 0.14 |
| chr17 | 28712442 | 28712717 | Lhfp15        | ENSMUSG00000062252 | -84  | 0.07 | 0.17 | 0.06 | 0.13 | 0.13 | 0.19 |
| chr17 | 36294887 | 36295151 | Gm6659        | ENSMUSG00000092289 | 86   | 0.1  | 0.05 | 0.09 | 0.09 | 0.06 | 0.11 |
| chr17 | 66131913 | 66133319 | Ppp4r1        | ENSMUSG00000061950 | 703  | 0.14 | 0.14 | 0.1  | 0.12 | 0.11 | 0.13 |
| chr17 | 81126801 | 81127465 | Map4k3        | ENSMUSG00000024242 | 300  | 0.09 | 0.09 | 0.11 | 0.14 | 0.1  | 0.16 |
| chr17 | 86544132 | 86544547 | Srbd1         | ENSMUSG00000024135 | 176  | 0.5  | NA   | 0.2  | 0.2  | 1    | 0.16 |
| chr17 | 46765761 | 46766514 | Ptk7          | ENSMUSG00000023972 | 248  | 0.18 | 0.1  | 0.08 | 0.11 | 0.12 | 0.13 |

|       |          |          |               |                    |      |      |      |      |      |      |      |
|-------|----------|----------|---------------|--------------------|------|------|------|------|------|------|------|
| chr17 | 46787296 | 46787892 | Cul7          | ENSMUSG00000038545 | 82   | 0.25 | 0.32 | 0.12 | 0.26 | 0.09 | 0.22 |
| chr17 | 56904062 | 56904481 | Dus3l         | ENSMUSG00000007603 | 97   | 0.07 | 0.09 | 0.08 | 0.12 | 0.06 | 0.14 |
| chr17 | 43766668 | 43767374 | Tdrd6         | ENSMUSG00000040140 | 194  | 0.15 | 0.2  | 0.12 | 0.17 | 0.11 | 0.12 |
| chr17 | 88035756 | 88036623 | Epcam         | ENSMUSG00000045394 | 870  | 0.37 | 0.32 | 0.18 | 0.23 | 0.28 | 0.23 |
| chr17 | 90854315 | 90855139 | Nrxn1         | ENSMUSG00000024109 | 485  | 0.31 | 0.69 | 0.09 | 0.2  | 0.44 | 0.14 |
| chr17 | 27193871 | 27194525 | Itpr3         | ENSMUSG00000042644 | -51  | 0.07 | 0.14 | 0.1  | 0.18 | 0.25 | 0.26 |
| chr17 | 36003343 | 36003814 | Ppp1r18       | ENSMUSG00000034595 | -27  | 0.2  | 0.52 | 0.1  | 0.21 | 0.16 | 0.14 |
| chr17 | 24670141 | 24670787 | Rab26         | ENSMUSG00000079657 | 193  | 1    | 0.17 | 0.11 | 0.16 | 0.14 | 0.1  |
| chr17 | 27053733 | 27054549 | Kifc5b        | ENSMUSG00000024301 | 105  | 0.1  | 0.11 | 0.11 | 0.16 | 0.15 | 0.17 |
| chr17 | 36115969 | 36117670 | Prr3          | ENSMUSG00000038500 | -575 | 0.14 | 0.12 | 0.08 | 0.12 | 0.11 | 0.13 |
| chr17 | 36033785 | 36034439 | Gm16279       | ENSMUSG00000084998 | 221  | 0.19 | 0.3  | 0.1  | 0.15 | 0.16 | 0.16 |
| chr17 | 45709429 | 45710385 | Hsp90ab1      | ENSMUSG00000023944 | -403 | 0.12 | 0.15 | 0.12 | 0.15 | 0.1  | 0.13 |
| chr17 | 44913939 | 44914576 | Supt3h        | ENSMUSG00000038954 | 156  | 0.08 | 0.15 | 0.08 | 0.13 | 0.04 | 0.15 |
| chr17 | 50329228 | 50329988 | Rftn1         | ENSMUSG00000039316 | 214  | 0.08 | 0.1  | 0.07 | 0.09 | 0.07 | 0.16 |
| chr17 | 27270542 | 27270957 | 2900010M23Rik | ENSMUSG00000024208 | -181 | 0.09 | 0.18 | 0.16 | 0.19 | 0.19 | 0.13 |
| chr17 | 31991827 | 31993097 | Sik1          | ENSMUSG00000024042 | 275  | 0.12 | 0.12 | 0.1  | 0.16 | 0.15 | 0.11 |
| chr17 | 66472823 | 66473192 | Ddx11         | ENSMUSG00000035842 | 147  | 0.1  | 0.15 | 0.12 | 0.1  | 0.06 | 0.13 |
| chr17 | 95148948 | 95149568 | Mettl4        | ENSMUSG00000055660 | -26  | 0.06 | 0.14 | 0.11 | 0.17 | 0.11 | 0.13 |
| chr17 | 24832697 | 24833553 | Gfer          | ENSMUSG00000040888 | -24  | 0.12 | 0.14 | 0.08 | 0.12 | 0.14 | 0.08 |
| chr17 | 25321078 | 25322162 | BC003965      | ENSMUSG00000067722 | 114  | 0.12 | 0.11 | 0.13 | 0.18 | 0.08 | 0.14 |
| chr17 | 27692055 | 27694895 | Hmga1         | ENSMUSG00000046711 | -90  | 0.13 | 0.12 | 0.12 | 0.17 | 0.12 | 0.16 |
| chr17 | 66450585 | 66451110 | Ndufv2        | ENSMUSG00000024099 | -12  | 0.14 | 0.17 | 0.1  | 0.13 | 0.11 | 0.16 |
| chr17 | 72131910 | 72132412 | Clip4         | ENSMUSG00000024059 | 874  | 0.18 | 0.36 | 0.09 | 0.11 | 0.15 | 0.13 |
| chr17 | 68046450 | 68047167 | Lama1         | ENSMUSG00000032796 | 203  | 0.32 | 0.39 | 0.11 | 0.14 | 0.22 | 0.18 |
| chr17 | 71947688 | 71948272 | Trmt61b       | ENSMUSG00000085492 | 106  | 0.06 | 0.08 | 0.09 | 0.15 | 0.12 | 0.15 |
| chr17 | 35257753 | 35258731 | Csnk2b        | ENSMUSG00000024387 | -267 | 0.1  | 0.32 | 0.08 | 0.13 | 0.13 | 0.12 |
| chr17 | 34045409 | 34046774 | BC051226      | ENSMUSG00000092564 | 32   | 0.13 | 0.19 | 0.12 | 0.1  | 0.16 | 0.19 |
| chr17 | 10510981 | 10511397 | Qk            | ENSMUSG00000062078 | 1037 | 0.08 | 0.14 | 0.13 | 0.09 | 0.04 | 0.11 |
| chr17 | 26337866 | 26338165 | Arhgdig       | ENSMUSG00000073433 | 73   | 0.16 | 0.07 | 0.09 | 0.14 | 0.11 | 0.15 |
| chr17 | 47505789 | 47506295 | Mrps10        | ENSMUSG00000034729 | 206  | 0.21 | 0.16 | 0.15 | 0.22 | 0.26 | 0.16 |

|       |          |          |               |                     |      |      |      |      |      |      |      |
|-------|----------|----------|---------------|---------------------|------|------|------|------|------|------|------|
| chr17 | 56442647 | 56443926 | Uhrf1         | ENSMUSG00000001228  | 542  | 1    | 0.5  | 0.13 | 0.18 | 0.62 | 0.15 |
| chr17 | 24388068 | 24388690 | Ccnf          | ENSMUSG000000072082 | -124 | 0.16 | 0.29 | 0.12 | 0.27 | 0.21 | 0.16 |
| chr17 | 34114701 | 34115700 | H2-K2         | ENSMUSG000000067203 | 533  | 0.06 | 0.1  | 0.11 | 0.13 | 0.04 | 0.09 |
| chr17 | 84105249 | 84105850 | Mta3          | ENSMUSG000000055817 | 46   | 0.42 | 0.65 | 0.18 | 0.16 | 0.36 | 0.22 |
| chr17 | 46817572 | 46818153 | Klhdc3        | ENSMUSG000000063576 | 17   | 0.11 | 0.11 | 0.11 | 0.17 | 0.21 | 0.12 |
| chr17 | 88463493 | 88465240 | Fbxo11        | ENSMUSG000000005371 | 2    | 0.21 | 0.2  | 0.12 | 0.13 | 0.19 | 0.15 |
| chr17 | 29169049 | 29169876 | Srsf3         | ENSMUSG000000071172 | -156 | 0.19 | 0.1  | 0.08 | 0.12 | 0.16 | 0.18 |
| chr17 | 56396068 | 56397055 | Fem1a         | ENSMUSG000000043683 | 345  | 0.15 | 0.23 | 0.11 | 0.22 | 0.13 | 0.2  |
| chr17 | 26340225 | 26340609 | Rgs11         | ENSMUSG000000024186 | 460  | 0.2  | NA   | 0.05 | 0.15 | 1    | NA   |
| chr17 | 28659748 | 28660423 | E230001N04Rik | ENSMUSG000000066170 | -153 | 0.11 | 0.25 | 0.1  | 0.15 | 0.26 | 0.18 |
| chr17 | 33855386 | 33855780 | 2-Mar         | ENSMUSG000000079557 | -47  | 1    | 0.87 | 0.28 | 0.3  | 0.53 | 0.44 |
| chr17 | 85357653 | 85358064 | Ppm1b         | ENSMUSG000000061130 | 517  | 0.19 | 0.16 | 0.09 | 0.2  | 0.14 | 0.12 |
| chr17 | 53706301 | 53707545 | Kat2b         | ENSMUSG00000000708  | 627  | 0.27 | 0.36 | 0.08 | 0.19 | 0.22 | 0.18 |
| chr17 | 32326049 | 32326371 | Ephx3         | ENSMUSG000000037577 | 198  | 0.5  | 0.33 | 0.2  | NA   | 1    | 0.29 |
| chr17 | 35958731 | 35959382 | Ier3          | ENSMUSG000000003541 | 427  | 0.18 | 0.31 | 0.1  | 0.17 | 0.31 | 0.17 |
| chr17 | 46789931 | 46790144 | Cul7          | ENSMUSG000000038545 | 195  | 0.9  | 0.9  | 0.87 | 0.89 | 0.94 | 0.99 |
| chr17 | 27771859 | 27772454 | Rps10         | ENSMUSG000000052146 | 18   | 0.25 | 0.2  | 0.08 | 0.19 | 0.21 | 0.14 |
| chr17 | 28906918 | 28907169 | Mapk13        | ENSMUSG000000004864 | 726  | 0.19 | 0.25 | 0.1  | 0.17 | 0.12 | 0.24 |
| chr17 | 45692551 | 45693234 | Nfkbie        | ENSMUSG000000023947 | 227  | 0.13 | 0.33 | 0.1  | 0.15 | 0.1  | 0.15 |
| chr17 | 27993313 | 27994090 | Uhrf1bp1      | ENSMUSG000000039512 | 266  | 0.13 | 0.14 | 0.08 | 0.16 | 0.09 | 0.12 |
| chr17 | 36281842 | 36282935 | 2410017117Rik | ENSMUSG000000038311 | 425  | 0.15 | 0.11 | 0.12 | 0.33 | 0.2  | 0.19 |
| chr17 | 23813500 | 23814500 | Tnfrsf12a     | ENSMUSG000000023905 | 416  | 0.22 | 0.2  | 0.14 | 0.13 | 0.17 | 0.18 |
| chr17 | 86017308 | 86017976 | Six3os1       | ENSMUSG000000056364 | -229 | 0.14 | 0.11 | 0.09 | 0.15 | 0.11 | 0.12 |
| chr17 | 27702368 | 27702948 | Al413582      | ENSMUSG000000062753 | -46  | 0.06 | 0.06 | 0.11 | 0.11 | 0.1  | 0.16 |
| chr17 | 45685966 | 45686664 | Tmem151b      | ENSMUSG000000050405 | 33   | 0.12 | 0.25 | 0.11 | 0.15 | 0.16 | 0.13 |
| chr17 | 87664966 | 87665242 | Mcf2          | ENSMUSG000000024150 | 99   | 0.13 | 0.15 | 0.12 | 0.23 | 0.1  | 0.2  |
| chr17 | 24856517 | 24857442 | Snora78       | ENSMUSG000000089255 | -231 | 0.49 | 0.58 | 0.08 | 0.26 | 0.52 | 0.14 |
| chr17 | 35998119 | 35998528 | Nrm           | ENSMUSG000000059791 | 60   | 0.13 | 0.08 | 0.09 | 0.11 | 0.1  | 0.14 |
| chr17 | 80014386 | 80014979 | Fam82a1       | ENSMUSG000000036368 | 442  | 0.16 | 0.19 | 0.11 | 0.14 | 0.19 | 0.13 |
| chr17 | 31433103 | 31433660 | Slc37a1       | ENSMUSG000000024036 | 217  | 0.14 | 0.14 | 0.09 | 0.19 | 0.17 | 0.17 |

|       |          |          |           |                     |      |      |      |      |      |      |      |
|-------|----------|----------|-----------|---------------------|------|------|------|------|------|------|------|
| chr17 | 32457282 | 32458644 | Akap8     | ENSMUSG00000024045  | 135  | 0.09 | 0.1  | 0.08 | 0.1  | 0.07 | 0.12 |
| chr17 | 54437844 | 54438184 | Slc5a7    | ENSMUSG00000023945  | 345  | 0.13 | 0.2  | 0.16 | 0.26 | 0.09 | 0.11 |
| chr17 | 84911132 | 84911798 | Plekhh2   | ENSMUSG00000040852  | 230  | 0.11 | 0.19 | 0.1  | 0.14 | 0.13 | 0.14 |
| chr17 | 25707088 | 25708396 | Sox8      | ENSMUSG00000024176  | -583 | 0.56 | 0.47 | 0.14 | 0.23 | 0.46 | 0.26 |
| chr17 | 35606912 | 35607933 | H2-Q10    | ENSMUSG00000067235  | 388  | 0.1  | 0.2  | 0.1  | 0.18 | 0.08 | 0.13 |
| chr17 | 51951952 | 51952974 | Satb1     | ENSMUSG00000023927  | -458 | 0.15 | 0.2  | 0.08 | 0.14 | 0.13 | 0.1  |
| chr17 | 56812571 | 56813371 | Ranbp3    | ENSMUSG00000002372  | 291  | 0.12 | 0.14 | 0.11 | 0.14 | 0.11 | 0.19 |
| chr17 | 24278129 | 24278842 | Pdpk1     | ENSMUSG00000024122  | 35   | 0.09 | 0.09 | 0.11 | 0.18 | 0.1  | 0.12 |
| chr17 | 27957029 | 27957874 | D17Wsu92e | ENSMUSG00000056692  | -15  | 0.14 | 0.21 | 0.12 | 0.12 | 0.12 | 0.16 |
| chr17 | 88839638 | 88841164 | Foxn2     | ENSMUSG00000034998  | 350  | 0.09 | 0.15 | 0.07 | 0.14 | 0.08 | 0.11 |
| chr17 | 5940893  | 5941840  | Synj2     | ENSMUSG00000023805  | 86   | 0.15 | 0.19 | 0.15 | 0.22 | 0.21 | 0.16 |
| chr17 | 13200583 | 13201391 | Sod2      | ENSMUSG00000006818  | 282  | 0.17 | 0.21 | 0.12 | 0.18 | 0.29 | 0.1  |
| chr17 | 32533154 | 32533824 | Rasal3    | ENSMUSG00000052142  | 165  | 0.09 | 0.09 | 0.09 | 0.12 | 0.1  | 0.12 |
| chr17 | 45700795 | 45701366 | Slc35b2   | ENSMUSG00000037089  | 171  | 0.33 | 0.73 | 0.15 | 0.22 | 0.47 | 0.16 |
| chr17 | 71202107 | 71203164 | Tgif1     | ENSMUSG000000047407 | 251  | 0.14 | 0.16 | 0.08 | 0.2  | 0.11 | 0.09 |
| chr17 | 24795108 | 24795532 | Npw       | ENSMUSG00000071230  | 50   | 0.14 | 0.18 | 0.1  | 0.1  | 0.23 | 0.15 |
| chr17 | 47809349 | 47809778 | Usp49     | ENSMUSG00000090115  | -106 | 0.1  | 0.09 | 0.12 | 0.12 | 0.11 | 0.17 |
| chr17 | 74737856 | 74738773 | Spast     | ENSMUSG00000024068  | -13  | 0.11 | 0.46 | 0.1  | 0.15 | 0.21 | 0.13 |
| chr17 | 27076231 | 27076904 | Cuta      | ENSMUSG00000024194  | -200 | 0.13 | 0.14 | 0.12 | 0.21 | 0.11 | 0.17 |
| chr17 | 31656915 | 31657277 | Wdr4      | ENSMUSG00000024037  | -177 | 0.33 | 0.5  | 0.13 | 0.13 | 0.36 | 0.12 |
| chr17 | 33821668 | 33822602 | Hnrnpm    | ENSMUSG00000059208  | 195  | 0.09 | 0.11 | 0.1  | 0.2  | 0.13 | 0.13 |
| chr17 | 35960074 | 35960442 | Flot1     | ENSMUSG00000059714  | 83   | 0.5  | 0.23 | 0.07 | 0.15 | 0.17 | 0.11 |
| chr17 | 71351053 | 71352117 | Myl12a    | ENSMUSG00000024048  | -228 | 0.12 | 0.12 | 0.11 | 0.14 | 0.11 | 0.16 |
| chr17 | 25981067 | 25981583 | Rhot2     | ENSMUSG00000025733  | -74  | 1    | 0.88 | 0.13 | 0.3  | 0.94 | 0.38 |
| chr17 | 47831417 | 47832396 | Prickle4  | ENSMUSG00000079444  | -221 | 0.12 | 0.11 | 0.07 | 0.12 | 0.08 | 0.09 |
| chr17 | 87424118 | 87424934 | Pigf      | ENSMUSG00000024145  | 220  | 0.13 | 0.11 | 0.09 | 0.14 | 0.15 | 0.14 |
| chr17 | 73267222 | 73267776 | Lbh       | ENSMUSG00000024063  | -146 | 0.13 | 0.1  | 0.07 | 0.15 | 0.08 | 0.2  |
| chr17 | 74693737 | 74695130 | Memo1     | ENSMUSG00000058704  | -210 | 0.14 | 0.16 | 0.12 | 0.13 | 0.13 | 0.15 |
| chr17 | 74888787 | 74889308 | Yipf4     | ENSMUSG00000024072  | 193  | 0.33 | 0.25 | 0.15 | 0.2  | 0.3  | 0.12 |
| chr17 | 6079433  | 6080058  | Serac1    | ENSMUSG00000015659  | -18  | 0.5  | 0.57 | 0.51 | 0.6  | 0.75 | 0.62 |

|       |          |          |               |                    |       |      |      |      |      |      |      |
|-------|----------|----------|---------------|--------------------|-------|------|------|------|------|------|------|
| chr17 | 29230547 | 29232659 | Cdkn1a        | ENSMUSG00000023067 | 886   | 0.12 | 0.13 | 0.12 | 0.16 | 0.13 | 0.15 |
| chr17 | 36248178 | 36248398 | C920025E04Rik | ENSMUSG00000073405 | -45   | 0.14 | 0.11 | 0.11 | 0.23 | 0.29 | 0.1  |
| chr17 | 43938715 | 43939075 | Rcan2         | ENSMUSG00000039601 | 95    | 0.1  | 0.1  | 0.1  | 0.11 | 0.07 | 0.16 |
| chr17 | 47873882 | 47875501 | Tfeb          | ENSMUSG00000023990 | 712   | 0.16 | 0.22 | 0.11 | 0.17 | 0.14 | 0.14 |
| chr17 | 26204544 | 26206672 | Rab11fip3     | ENSMUSG00000037098 | 514   | 0.16 | 0.14 | 0.08 | 0.15 | 0.14 | 0.15 |
| chr17 | 26275318 | 26276194 | Axin1         | ENSMUSG00000024182 | 125   | 0.12 | 0.21 | 0.1  | 0.13 | 0.11 | 0.11 |
| chr17 | 35530983 | 35532038 | H2-Q5         | ENSMUSG00000055413 | 439   | 0.22 | 0.08 | 0.15 | 0.31 | 0.13 | 0.19 |
| chr17 | 46339307 | 46339958 | Polh          | ENSMUSG00000023953 | -61   | 0.07 | 0.1  | 0.08 | 0.11 | 0.1  | 0.09 |
| chr17 | 86086383 | 86087953 | Six2          | ENSMUSG00000024134 | 426   | 0.13 | 0.09 | 0.1  | 0.14 | 0.14 | 0.1  |
| chr17 | 8626350  | 8627702  | T             | ENSMUSG00000062327 | -262  | 0.12 | 0.17 | 0.14 | 0.12 | 0.16 | 0.15 |
| chr17 | 34056738 | 34057525 | Tapbp         | ENSMUSG00000024308 | -342  | 0.14 | 0.48 | 0.1  | 0.21 | 0.16 | 0.16 |
| chr17 | 56969223 | 56969641 | Rfx2          | ENSMUSG00000024206 | 999   | 0.33 | 0.12 | 0.12 | 0.16 | 0.1  | 0.2  |
| chr17 | 23781559 | 23782408 | Mmp25         | ENSMUSG00000023903 | 253   | 0.1  | 0.13 | 0.11 | 0.12 | 0.11 | 0.13 |
| chr17 | 29686589 | 29686893 | Tbc1d22b      | ENSMUSG00000042203 | 8     | 0.12 | 0.09 | 0.14 | 0.18 | 0.1  | 0.11 |
| chr17 | 45822252 | 45823705 | Tmem63b       | ENSMUSG00000036026 | -56   | 0.17 | 0.17 | 0.12 | 0.18 | 0.15 | 0.13 |
| chr17 | 27083595 | 27083845 | Mir3083       | ENSMUSG00000093118 | 1344  | 0.16 | 0.31 | 0.09 | 0.15 | 0.21 | 0.14 |
| chr17 | 56109847 | 56110190 | Shd           | ENSMUSG00000039154 | 128   | 0.33 | 0.23 | 0.1  | 0.15 | 0.28 | 0.15 |
| chr17 | 47824829 | 47826140 | Tomm6         | ENSMUSG00000033475 | -467  | 0.08 | 0.13 | 0.1  | 0.15 | 0.05 | 0.13 |
| chr17 | 86014329 | 86014685 | Six3os1       | ENSMUSG00000093460 | 36    | 0.33 | 0.5  | 0.12 | 0.18 | 0.14 | 0.25 |
| chr17 | 7152344  | 7153136  | Rsph3b        | ENSMUSG00000023806 | 134   | 0.22 | 0.11 | 0.1  | 0.1  | 0.15 | 0.2  |
| chr17 | 25973976 | 25974252 | Rhbdl1        | ENSMUSG00000025735 | -12   | 0.17 | 0.11 | 0.13 | 0.17 | 0.11 | 0.12 |
| chr17 | 36304363 | 36305445 | Gm8909        | ENSMUSG00000073402 | -115  | 0.13 | 0.09 | 0.1  | 0.11 | 0.11 | 0.13 |
| chr17 | 56259387 | 56260235 | Lrg1          | ENSMUSG00000037095 | 1558  | 0.06 | 0.12 | 0.11 | 0.17 | 0.07 | 0.17 |
| chr17 | 78599532 | 78600822 | Crim1         | ENSMUSG00000024074 | 589   | 0.11 | 0.23 | 0.09 | 0.14 | 0.12 | 0.13 |
| chr17 | 8476314  | 8477548  | Brp44l        | ENSMUSG00000023861 | 304   | 0.19 | 0.25 | 0.11 | 0.14 | 0.16 | 0.13 |
| chr17 | 23922815 | 23923213 | Flywch2       | ENSMUSG00000023911 | 5     | 0.2  | 0.04 | 0.13 | 0.2  | 0.06 | 0.09 |
| chr17 | 27109845 | 27110312 | Zbtb9         | ENSMUSG00000079605 | -34   | 0.12 | 0.07 | 0.13 | 0.21 | 0.14 | 0.24 |
| chr17 | 27657664 | 27658046 | Gm16005       | ENSMUSG00000082177 | -1663 | 0.12 | 0.2  | 0.07 | 0.08 | 0.16 | 0.13 |
| chr17 | 35804320 | 35804892 | Vars2         | ENSMUSG00000038838 | -121  | 0.15 | 0.08 | 0.09 | 0.16 | 0.14 | 0.14 |
| chr17 | 43803799 | 43804273 | Slc25a27      | ENSMUSG00000023912 | -72   | 0.25 | 0.15 | 0.15 | 0.3  | 0.17 | 0.12 |

|       |          |          |               |                     |       |      |      |      |      |      |      |
|-------|----------|----------|---------------|---------------------|-------|------|------|------|------|------|------|
| chr17 | 81343949 | 81344546 | Tmem178       | ENSMUSG00000024245  | 275   | 0.08 | 0.08 | 0.09 | 0.09 | 0.07 | 0.13 |
| chr17 | 70319660 | 70319963 | Dlgap1        | ENSMUSG00000003279  | 1050  | 0.36 | 0.86 | 0.09 | 0.12 | 0.42 | 0.11 |
| chr17 | 35031095 | 35032431 | Zbtb12        | ENSMUSG00000049823  | 259   | 0.19 | 0.07 | 0.08 | 0.15 | 0.16 | 0.12 |
| chr17 | 35035478 | 35035850 | Ehmt2         | ENSMUSG00000013787  | 220   | 0.13 | 0.41 | 0.07 | 0.11 | 0.12 | 0.15 |
| chr17 | 28450250 | 28450854 | Fance         | ENSMUSG00000007570  | 77    | 0.43 | 0.28 | 0.12 | 0.2  | 0.4  | 0.28 |
| chr17 | 32529355 | 32529615 | Rasal3        | ENSMUSG000000052142 | -1032 | 0.19 | 0.11 | 0.17 | 0.09 | 0.15 | 0.08 |
| chr17 | 47026395 | 47026932 | A330017A19Rik | ENSMUSG000000073388 | 691   | 0.33 | 0.26 | 0.29 | 0.18 | 0.44 | 0.29 |
| chr17 | 56179632 | 56180026 | Chaf1a        | ENSMUSG00000002835  | 2     | 0.5  | 0.33 | 0.08 | 0.32 | 0.22 | 0.19 |
| chr17 | 66121621 | 66122227 | Rab31         | ENSMUSG000000056515 | 58    | 0.1  | 0.1  | 0.09 | 0.12 | 0.09 | 0.14 |
| chr17 | 25998233 | 25998647 | Wdr90         | ENSMUSG000000073434 | -112  | 0.05 | 0.06 | 0.06 | 0.05 | 0.04 | 0.05 |
| chr17 | 27821918 | 27822333 | Pacsin1       | ENSMUSG000000040276 | -17   | 0.23 | 0.31 | 0.1  | 0.14 | 0.25 | 0.15 |
| chr17 | 28655024 | 28655381 | Fkbp5         | ENSMUSG000000024222 | -733  | 0.11 | 1    | 0.14 | 0.14 | 0.18 | 0.22 |
| chr17 | 32173235 | 32173631 | Rrp1b         | ENSMUSG000000058392 | 85    | 0.03 | 0.03 | 0.05 | 0.09 | 0.05 | 0.05 |
| chr17 | 32250642 | 32251128 | Gm17276       | ENSMUSG000000090984 | 511   | 0.08 | 0.13 | 0.1  | 0.14 | 0.07 | 0.29 |
| chr17 | 34767716 | 34768080 | Prrt1         | ENSMUSG000000015476 | -451  | 0.11 | 0.12 | 0.13 | 0.14 | 0.12 | 0.11 |
| chr17 | 56213991 | 56214560 | Ubxn6         | ENSMUSG000000019578 | -4    | 0.17 | 0.18 | 0.11 | 0.14 | 0.13 | 0.15 |
| chr17 | 56464995 | 56465868 | Kdm4b         | ENSMUSG000000024201 | -54   | 0.22 | 0.17 | 0.15 | 0.18 | 0.21 | 0.17 |
| chr17 | 34092226 | 34093229 | Rps18         | ENSMUSG000000008668 | -129  | 0.08 | 0.08 | 0.11 | 0.2  | 0.09 | 0.15 |
| chr17 | 35576078 | 35577016 | H2-Q7         | ENSMUSG000000060550 | 447   | 0.19 | 0.67 | 0.15 | 0.16 | 0.21 | 0.17 |
| chr17 | 87152459 | 87154888 | Epas1         | ENSMUSG000000024140 | 426   | 0.17 | 0.22 | 0.13 | 0.17 | 0.17 | 0.19 |
| chr17 | 3326389  | 3327232  | Tiam2         | ENSMUSG000000023800 | 237   | 0.24 | 0.13 | 0.12 | 0.21 | 0.25 | 0.29 |
| chr17 | 6106525  | 6107370  | Tulp4         | ENSMUSG000000034377 | 392   | 0.2  | 0.14 | 0.09 | 0.1  | 0.2  | 0.12 |
| chr17 | 6270324  | 6271112  | Tmem181a      | ENSMUSG000000038141 | 243   | 0.14 | 0.26 | 0.15 | 0.16 | 0.19 | 0.12 |
| chr17 | 10512097 | 10513182 | Qk            | ENSMUSG000000062078 | -413  | 0.13 | 0.23 | 0.08 | 0.1  | 0.14 | 0.11 |
| chr17 | 15097765 | 15098438 | Phf10         | ENSMUSG000000023883 | 136   | 0.19 | 0.12 | 0.09 | 0.18 | 0.19 | 0.09 |
| chr17 | 15532998 | 15533234 | Fam120b       | ENSMUSG000000014763 | -94   | 0.33 | 0.38 | 0.08 | 0.13 | 0.29 | 0.19 |
| chr17 | 21082162 | 21082894 | Ppp2r1a       | ENSMUSG000000007564 | 253   | 0.33 | 0.33 | 0.17 | 0.21 | 0.31 | 0.23 |
| chr17 | 22099239 | 22099896 | Zfp942        | ENSMUSG000000071267 | -149  | 0.2  | 0.15 | 0.18 | 0.26 | 0.11 | 0.22 |
| chr17 | 23694718 | 23695132 | Gm17633       | ENSMUSG000000090725 | 1189  | 0.87 | 1    | 0.7  | 0.73 | 0.9  | 0.92 |
| chr17 | 23876781 | 23877536 | Paqr4         | ENSMUSG000000023909 | 139   | 0.18 | 0.21 | 0.11 | 0.17 | 0.18 | 0.11 |

|       |          |          |          |                    |      |      |      |      |      |      |      |
|-------|----------|----------|----------|--------------------|------|------|------|------|------|------|------|
| chr17 | 23882653 | 23882900 | Kremen2  | ENSMUSG00000040680 | 20   | 0.91 | 0.75 | 0.16 | 0.33 | 0.93 | 0.16 |
| chr17 | 24210048 | 24210613 | Kctd5    | ENSMUSG00000016946 | 122  | 0.25 | 0.27 | 0.15 | 0.19 | 0.16 | 0.11 |
| chr17 | 24300556 | 24300773 | Amdhd2   | ENSMUSG00000036820 | -4   | 0.09 | 0.09 | 0.12 | 0.14 | 0.08 | 0.12 |
| chr17 | 24686630 | 24687812 | Pkd1     | ENSMUSG00000032855 | 326  | 0.1  | 0.12 | 0.08 | 0.14 | 0.1  | 0.12 |
| chr17 | 24826673 | 24826953 | Syng3    | ENSMUSG0000007021  | 87   | 0.09 | 0.1  | 0.06 | 0.09 | 0.07 | 0.15 |
| chr17 | 25073401 | 25074009 | Mapk8ip3 | ENSMUSG00000024163 | 134  | 0.11 | 0.16 | 0.11 | 0.1  | 0.11 | 0.16 |
| chr17 | 25097261 | 25097875 | Hn1l     | ENSMUSG00000024165 | 13   | 0.2  | 0.07 | 0.24 | 0.11 | 0.29 | 0.11 |
| chr17 | 25270285 | 25270605 | Cln7     | ENSMUSG00000036636 | 109  | 0.1  | 0.09 | 0.1  | 0.12 | 0.09 | 0.11 |
| chr17 | 26005248 | 26005751 | Fam195a  | ENSMUSG00000025732 | 184  | 0.11 | 0.18 | 0.12 | 0.13 | 0.09 | 0.14 |
| chr17 | 26056068 | 26056846 | Rab40c   | ENSMUSG00000025730 | -6   | 0.17 | 0.43 | 0.49 | 0.37 | 0.22 | 0.2  |
| chr17 | 26232091 | 26232469 | Nme4     | ENSMUSG00000024177 | 138  | 0.33 | NA   | 0.12 | 0.29 | 0.33 | 0.19 |
| chr17 | 26644927 | 26645849 | Dusp1    | ENSMUSG00000024190 | 31   | 0.1  | 0.29 | 0.09 | 0.11 | 0.09 | 0.08 |
| chr17 | 26698314 | 26698777 | Ergic1   | ENSMUSG0000001576  | 111  | 0.14 | 0.11 | 0.17 | 0.1  | 0.13 | 0.14 |
| chr17 | 26813286 | 26813681 | Atp6v0e  | ENSMUSG00000015575 | 142  | 0.18 | 0.18 | 0.11 | 0.14 | 0.17 | 0.16 |
| chr17 | 28369487 | 28369980 | Ppard    | ENSMUSG00000002250 | 34   | 0.14 | 0.2  | 0.06 | 0.12 | 0.11 | 0.16 |
| chr17 | 28486949 | 28488477 | Tead3    | ENSMUSG00000002249 | -422 | 0.24 | 0.31 | 0.13 | 0.18 | 0.24 | 0.16 |
| chr17 | 28906290 | 28906544 | Mapk13   | ENSMUSG00000004864 | 123  | 0.15 | 0.26 | 0.14 | 0.17 | 0.15 | 0.21 |
| chr17 | 29400713 | 29401154 | Ppil1    | ENSMUSG00000024007 | -76  | 0.33 | 0.17 | 0.09 | 0.2  | 0.31 | 0.12 |
| chr17 | 29627094 | 29629150 | Pim1     | ENSMUSG00000024014 | 365  | 0.2  | 0.11 | 0.09 | 0.17 | 0.2  | 0.17 |
| chr17 | 29751662 | 29752242 | Rnf8     | ENSMUSG00000090083 | 217  | 0.12 | 0.08 | 0.09 | 0.17 | 0.09 | 0.14 |
| chr17 | 30025966 | 30026884 | Mdga1    | ENSMUSG00000043557 | 470  | 0.67 | 0.46 | 0.21 | 1    | 0.62 | 0.19 |
| chr17 | 30749300 | 30749637 | Glo1     | ENSMUSG00000024026 | 136  | 0.75 | 0.41 | 0.12 | 0.24 | 0.64 | 0.16 |
| chr17 | 31038477 | 31038970 | Glp1r    | ENSMUSG00000024027 | -62  | 0.14 | 0.62 | 0.1  | 0.14 | 0.14 | 0.23 |
| chr17 | 31413936 | 31414351 | Rsph1    | ENSMUSG00000024033 | 109  | 0.12 | 1    | 0.09 | 0.11 | 0.09 | 0.15 |
| chr17 | 31795046 | 31795942 | U2af1    | ENSMUSG00000061613 | 205  | 0.1  | 0.09 | 0.08 | 0.09 | 0.1  | 0.12 |
| chr17 | 32302693 | 32303206 | Notch3   | ENSMUSG00000038146 | 876  | 0.2  | 0.15 | 0.15 | 0.18 | 0.2  | 0.14 |
| chr17 | 33061729 | 33061933 | Cyp4f13  | ENSMUSG00000024055 | 999  | 0.11 | 0.1  | 0.08 | 0.13 | 0.11 | 0.15 |
| chr17 | 34027106 | 34027910 | Kifc1    | ENSMUSG00000079553 | -24  | 0.12 | NA   | 0.07 | 0.26 | 0.1  | 0.17 |
| chr17 | 34052836 | 34053184 | Tapbp    | ENSMUSG00000024308 | 166  | 0.14 | 0.13 | 0.1  | 0.2  | 0.14 | 0.14 |
| chr17 | 34324618 | 34325011 | Tap1     | ENSMUSG00000037321 | 141  | 0.07 | 0.15 | 0.13 | 0.15 | 0.07 | 0.1  |



|       |          |          |               |                    |      |      |      |      |      |      |      |
|-------|----------|----------|---------------|--------------------|------|------|------|------|------|------|------|
| chr17 | 34723804 | 34724851 | Notch4        | ENSMUSG00000015468 | 437  | 0.5  | 0.84 | 0.15 | 0.27 | 0.48 | 0.17 |
| chr17 | 34740957 | 34741420 | Agpat1        | ENSMUSG00000034254 | -19  | 0.33 | NA   | 0.11 | 0.26 | 0.5  | 0.23 |
| chr17 | 35042288 | 35042506 | Ehmt2         | ENSMUSG00000013787 | 212  | 1    | 1    | 0.71 | 0.88 | 1    | 0.91 |
| chr17 | 35118660 | 35119435 | Gm10501       | ENSMUSG00000073415 | -314 | 0.5  | 0.33 | 0.14 | 0.21 | 0.32 | 0.28 |
| chr17 | 35195958 | 35196594 | Ddah2         | ENSMUSG0000007039  | 296  | 0.5  | 0.5  | 0.12 | 0.4  | 0.36 | 0.26 |
| chr17 | 35202266 | 35202733 | Ly6g6c        | ENSMUSG0000007044  | 166  | 0.32 | 0.5  | 0.22 | 0.32 | 0.4  | 0.28 |
| chr17 | 35272053 | 35272768 | Bag6          | ENSMUSG00000024392 | 287  | 0.15 | 0.22 | 0.11 | 0.16 | 0.14 | 0.18 |
| chr17 | 35379100 | 35379422 | Ddx39b        | ENSMUSG00000019432 | 320  | 0.2  | 0.09 | 0.13 | 0.15 | 0.17 | 0.1  |
| chr17 | 35975118 | 35975357 | Tubb5         | ENSMUSG0000001525  | -84  | 0.15 | 0.19 | 0.08 | 0.2  | 0.13 | 0.21 |
| chr17 | 36394514 | 36394839 | Rpp21         | ENSMUSG00000024446 | -121 | 0.21 | 0.2  | 0.11 | 0.2  | 0.22 | 0.16 |
| chr17 | 37079843 | 37080358 | Rnf39         | ENSMUSG00000036492 | 237  | 0.1  | 0.19 | 0.1  | 0.11 | 0.1  | 0.15 |
| chr17 | 44325458 | 44325939 | Clic5         | ENSMUSG00000023959 | 177  | 0.1  | 0.08 | 0.17 | 0.17 | 0.11 | 0.06 |
| chr17 | 45870887 | 45871124 | Gm16862       | ENSMUSG00000086615 | -450 | 0.07 | 0.08 | 0.07 | 0.14 | 0.07 | 0.07 |
| chr17 | 46464751 | 46465447 | Abcc10        | ENSMUSG00000032842 | -174 | 0.24 | 0.19 | 0.15 | 0.27 | 0.26 | 0.26 |
| chr17 | 46633637 | 46633947 | BC048355      | ENSMUSG00000040658 | 54   | 0.22 | NA   | 0.12 | 0.21 | 0.2  | 0.13 |
| chr17 | 46691939 | 46693325 | Srf           | ENSMUSG00000015605 | 479  | 0.18 | 0.17 | 0.11 | 0.17 | 0.18 | 0.17 |
| chr17 | 46810963 | 46811379 | Rrp36         | ENSMUSG00000023971 | 33   | 0.17 | 0.1  | 0.06 | 0.18 | 0.17 | 0.13 |
| chr17 | 46865931 | 46866136 | Gnmt          | ENSMUSG00000002769 | 84   | 0.22 | 0.24 | 0.16 | 0.26 | 0.21 | 0.11 |
| chr17 | 47027465 | 47028130 | Tbcc          | ENSMUSG00000036430 | 227  | 0.15 | 0.05 | 0.07 | 0.1  | 0.14 | 0.11 |
| chr17 | 47573374 | 47573636 | Al661453      | ENSMUSG00000034382 | -59  | 0.1  | 0.09 | 0.09 | 0.12 | 0.1  | 0.1  |
| chr17 | 47747860 | 47748639 | Bysl          | ENSMUSG00000023988 | 192  | 0.12 | 0.09 | 0.12 | 0.18 | 0.18 | 0.21 |
| chr17 | 47971106 | 47971599 | Mdf1          | ENSMUSG00000032717 | 288  | 0.08 | 0.07 | 0.08 | 0.18 | 0.08 | 0.12 |
| chr17 | 48059151 | 48059697 | Gm15556       | ENSMUSG00000085932 | 97   | 0.08 | 0.1  | 0.17 | 0.16 | 0.08 | 0.16 |
| chr17 | 48061997 | 48062202 | Foxp4         | ENSMUSG00000023991 | -505 | 1    | 0.25 | 0.07 | 0.27 | 0.5  | 0.26 |
| chr17 | 49567575 | 49567874 | Mocs1         | ENSMUSG00000064120 | 37   | 0.33 | 0.29 | 0.09 | 0.21 | 0.25 | 0.15 |
| chr17 | 56748950 | 56749381 | 2410015M20Rik | ENSMUSG00000049760 | 29   | 0.12 | 0.12 | 0.08 | 0.15 | 0.12 | 0.15 |
| chr17 | 57129506 | 57130123 | Clpp          | ENSMUSG00000002660 | 127  | 0.11 | 0.1  | 0.09 | 0.15 | 0.1  | 0.12 |
| chr17 | 57226871 | 57227110 | Tubb4a        | ENSMUSG00000062591 | 215  | 0.23 | 0.12 | 0.13 | 0.13 | 0.19 | 0.2  |
| chr17 | 57244719 | 57245219 | Tnfsf9        | ENSMUSG00000035678 | 161  | 0.38 | 0.5  | 0.13 | 0.16 | 0.25 | 0.22 |
| chr17 | 68623099 | 68623317 | L3mbt4        | ENSMUSG00000041565 | 71   | 0.12 | NA   | 0.14 | 0.13 | 0.2  | 0.17 |

|       |          |          |               |                    |       |      |      |      |      |      |      |
|-------|----------|----------|---------------|--------------------|-------|------|------|------|------|------|------|
| chr17 | 71183865 | 71184138 | RP23-349B16.3 | ENSMUSG00000093622 | -3    | 0.5  | 0.26 | 0.18 | 0.33 | 0.33 | 0.11 |
| chr17 | 71201737 | 71201968 | Tgif1         | ENSMUSG00000047407 | -778  | 0.14 | 0.1  | 0.11 | 0.17 | 0.2  | 0.25 |
| chr17 | 71875930 | 71876547 | Ndc80         | ENSMUSG00000024056 | -41   | 0.5  | 0.17 | 0.16 | 0.2  | 0.2  | 0.16 |
| chr17 | 73268677 | 73268939 | Lbh           | ENSMUSG00000024063 | 1163  | 1    | 1    | 0.33 | 1    | 0.47 | 0.91 |
| chr17 | 74154084 | 74154304 | Ehd3          | ENSMUSG00000024065 | 13    | 0.09 | 0.2  | 0.09 | 0.15 | 0.09 | 0.1  |
| chr17 | 74396795 | 74397262 | Srd5a2        | ENSMUSG00000038541 | 228   | 0.6  | NA   | 0.1  | 0.19 | 0.5  | 0.11 |
| chr17 | 74927160 | 74928688 | Birc6         | ENSMUSG00000024073 | 289   | 0.08 | 0.1  | 0.08 | 0.13 | 0.08 | 0.14 |
| chr17 | 79315816 | 79316107 | 1110001A16Rik | ENSMUSG00000062691 | 122   | 0.07 | 0.23 | 0.07 | 0.09 | 0.08 | 0.12 |
| chr17 | 79419658 | 79420578 | Prkd3         | ENSMUSG00000024070 | -1    | 0.1  | 0.08 | 0.1  | 0.14 | 0.07 | 0.12 |
| chr17 | 80605793 | 80606865 | Srsf7         | ENSMUSG00000024097 | -309  | 0.07 | 0.13 | 0.11 | 0.15 | 0.07 | 0.19 |
| chr17 | 81464230 | 81464531 | Thumpd2       | ENSMUSG00000024246 | 45    | 0.1  | 0.18 | 0.08 | 0.12 | 0.09 | 0.11 |
| chr17 | 83615200 | 83615463 | Pkdcc         | ENSMUSG00000024247 | 525   | 0.16 | 0.08 | 0.11 | 0.1  | 0.17 | 0.13 |
| chr17 | 83913390 | 83914054 | Cox7a2l       | ENSMUSG00000024248 | -49   | 0.16 | 0.23 | 0.12 | 0.2  | 0.16 | 0.15 |
| chr17 | 85075378 | 85075666 | Abcg5         | ENSMUSG00000040505 | -60   | 0.33 | 0.67 | 0.17 | 0.33 | 0.2  | 0.12 |
| chr17 | 88093857 | 88094215 | Msh2          | ENSMUSG00000024151 | -1845 | 1    | 1    | 1    | 0.97 | 0.86 | 1    |
| chr17 | 88374020 | 88375133 | Msh6          | ENSMUSG00000005370 | 186   | 0.13 | 0.15 | 0.08 | 0.13 | 0.13 | 0.13 |
| chr17 | 6466075  | 6466287  | Tmem181b-ps   | ENSMUSG00000079733 | 176   | 1    | NA   | NA   | 1    | NA   | NA   |
| chr17 | 6489283  | 6489730  | Tmem181b-ps   | ENSMUSG00000079733 | 20    | 0.25 | NA   | 0.04 | 0.07 | NA   | 0.06 |
| chr17 | 6600854  | 6601616  | Dynlt1f       | ENSMUSG00000079732 | 439   | NA   | NA   | NA   | 1    | NA   | NA   |
| chr17 | 7182843  | 7183457  | Rnaset2b      | ENSMUSG00000079724 | -59   | NA   | NA   | 0.11 | 0.14 | NA   | 0.07 |
| chr17 | 8138412  | 8139150  | Rsph3a        | ENSMUSG00000073471 | 263   | NA   | NA   | 1    | 0.5  | 1    | NA   |
| chr17 | 8717650  | 8718009  | Pde10a        | ENSMUSG00000023868 | -408  | NA   | 0.33 | 0.15 | NA   | NA   | 0.5  |
| chr17 | 14417476 | 14417699 | Smoc2         | ENSMUSG00000023886 | 1074  | NA   | NA   | 0.5  | NA   | NA   | 0.29 |
| chr17 | 15098638 | 15098927 | Phf10         | ENSMUSG00000023883 | -545  | NA   | NA   | NA   | 0.5  | NA   | NA   |
| chr17 | 15178304 | 15178700 | Tcte3         | ENSMUSG00000079707 | 21    | NA   | NA   | 1    | NA   | 0.92 | 0.5  |
| chr17 | 15701090 | 15701526 | Prdm9         | ENSMUSG00000051977 | -22   | NA   | 1    | 0.4  | NA   | NA   | 0.32 |
| chr17 | 15842659 | 15842864 | Chd1          | ENSMUSG00000023852 | 779   | NA   | 0.29 | 0.1  | 0.3  | 0.1  | 0.15 |
| chr17 | 17482962 | 17483177 | Gm9786        | ENSMUSG00000043801 | 35    | 1    | NA   | 0.29 | 0.08 | NA   | 0.33 |
| chr17 | 17510939 | 17511254 | Riok2         | ENSMUSG00000023846 | -200  | 0.27 | NA   | 0.15 | 0.23 | NA   | 0.09 |
| chr17 | 17975053 | 17975359 | Ncrna00085    | ENSMUSG00000080316 | 548   | 0.33 | 0.43 | 0.16 | 0.27 | NA   | 0.1  |

|       |          |          |               |                    |      |      |      |      |      |      |      |
|-------|----------|----------|---------------|--------------------|------|------|------|------|------|------|------|
| chr17 | 18046880 | 18047367 | Gm7535        | ENSMUSG00000090957 | 1788 | NA   | 0.57 | 0.23 | 0.13 | 0.21 | 0.23 |
| chr17 | 21146041 | 21146267 | Zfp160        | ENSMUSG00000067942 | 249  | NA   | NA   | NA   | NA   | 1    | NA   |
| chr17 | 22498151 | 22498481 | Zfp944        | ENSMUSG00000033972 | 45   | NA   | 0.16 | 0.06 | 0.07 | 0.12 | 0.18 |
| chr17 | 23810495 | 23810900 | Thoc6         | ENSMUSG00000041319 | -125 | NA   | 0.42 | 0.13 | 0.11 | 0.28 | 0.16 |
| chr17 | 23816440 | 23816788 | Cldn6         | ENSMUSG00000023906 | 282  | 0.75 | 0.17 | 0.24 | 0.4  | NA   | 0.3  |
| chr17 | 23927427 | 23927650 | D930048G16Rik | ENSMUSG00000090444 | -133 | NA   | NA   | 0.25 | NA   | NA   | 0.25 |
| chr17 | 24357454 | 24357740 | 1600002H07Rik | ENSMUSG00000024118 | 40   | NA   | 1    | 0.16 | 0.22 | NA   | 0.29 |
| chr17 | 24591600 | 24591803 | E4f1          | ENSMUSG00000024137 | 555  | NA   | NA   | 0.25 | 0.78 | NA   | 0.78 |
| chr17 | 24664586 | 24664902 | Traf7         | ENSMUSG00000052752 | -15  | NA   | 0.45 | 0.15 | 0.31 | 0.28 | 0.18 |
| chr17 | 24769298 | 24769905 | Tsc2          | ENSMUSG00000002496 | -27  | NA   | NA   | NA   | 0.75 | NA   | 0.67 |
| chr17 | 24824364 | 24824672 | Syngn3        | ENSMUSG00000007021 | 626  | NA   | NA   | 1    | NA   | NA   | 0.5  |
| chr17 | 24844440 | 24844651 | Tbl3          | ENSMUSG00000040688 | 23   | NA   | 0.14 | 0.1  | 0.21 | 0.17 | 0.11 |
| chr17 | 24861010 | 24861439 | Ndufb10       | ENSMUSG00000040048 | 115  | NA   | 1    | 0.08 | 0.2  | NA   | 0.1  |
| chr17 | 25032747 | 25032964 | Nme3          | ENSMUSG00000073435 | -590 | NA   | 0.5  | 0.15 | 0.52 | 0.25 | 0.22 |
| chr17 | 25033567 | 25033839 | Nme3          | ENSMUSG00000073435 | 7    | 1    | NA   | 0.13 | 0.12 | NA   | 0.21 |
| chr17 | 25252725 | 25252997 | Telo2         | ENSMUSG00000024170 | -11  | NA   | NA   | 0.24 | NA   | NA   | 0.1  |
| chr17 | 25715985 | 25716355 | Lmf1          | ENSMUSG00000002279 | 51   | NA   | 1    | 0.33 | 0.38 | 0.17 | 0.25 |
| chr17 | 25910541 | 25910905 | Narfl         | ENSMUSG00000002280 | 2    | NA   | 0.2  | 0.1  | 0.1  | 0.2  | 0.28 |
| chr17 | 26011989 | 26012739 | 0610011F06Rik | ENSMUSG00000025731 | -45  | NA   | 0.57 | 0.18 | 0.17 | 0.25 | 0.17 |
| chr17 | 26260402 | 26260699 | Mrpl28        | ENSMUSG00000024181 | 85   | 0.5  | NA   | 0.15 | NA   | NA   | 0.5  |
| chr17 | 26380814 | 26381331 | Itfg3         | ENSMUSG00000024187 | 14   | NA   | 0.57 | 0.17 | 0.37 | 0.27 | 0.24 |
| chr17 | 27792417 | 27792872 | Pacsin1       | ENSMUSG00000040276 | 190  | NA   | 1    | 0.11 | 0.25 | 0.5  | 0.24 |
| chr17 | 28044400 | 28044756 | Taf11         | ENSMUSG00000024218 | 91   | NA   | 0.25 | 0.1  | 0.29 | 0.19 | 0.07 |
| chr17 | 28217531 | 28217833 | Tcp11         | ENSMUSG00000062859 | -136 | NA   | NA   | 0.19 | 0.2  | 0.11 | 0.16 |
| chr17 | 28501193 | 28501516 | Tulp1         | ENSMUSG00000037446 | 730  | NA   | NA   | 0.04 | 0.17 | NA   | 0.36 |
| chr17 | 29853761 | 29854098 | 1110021J02Rik | ENSMUSG00000024018 | -21  | 1    | 0.14 | 0.15 | 0.14 | NA   | 0.14 |
| chr17 | 32487382 | 32487843 | Akap8l        | ENSMUSG00000002625 | -86  | NA   | NA   | 0.09 | NA   | NA   | 0.2  |
| chr17 | 33102945 | 33103181 | Zfp472        | ENSMUSG00000053600 | 304  | NA   | 0.1  | 0.09 | 0.17 | NA   | 0.15 |
| chr17 | 33495377 | 33495652 | Zfp81         | ENSMUSG00000003929 | 309  | NA   | NA   | 0.75 | NA   | NA   | NA   |
| chr17 | 33661096 | 33661314 | Adamts10      | ENSMUSG00000024299 | 56   | 0.24 | 0.19 | 0.09 | 0.23 | NA   | 0.2  |

|       |          |          |               |                     |      |      |      |      |      |      |      |
|-------|----------|----------|---------------|---------------------|------|------|------|------|------|------|------|
| chr17 | 33766033 | 33766274 | Zfp414        | ENSMUSG00000073423  | 118  | NA   | 1    | NA   | 0.19 | NA   | 0.08 |
| chr17 | 33918122 | 33918384 | Angptl4       | ENSMUSG00000002289  | 235  | NA   | 0.09 | 0.09 | 0.13 | NA   | 0.17 |
| chr17 | 33961401 | 33961652 | Rps28         | ENSMUSG000000067288 | -116 | NA   | NA   | 1    | NA   | NA   | 0.33 |
| chr17 | 34088171 | 34088545 | B3galt4       | ENSMUSG000000067370 | 75   | NA   | 0.21 | 0.13 | 0.07 | 0.06 | 0.15 |
| chr17 | 34341369 | 34341899 | Tap2          | ENSMUSG000000024339 | 122  | NA   | 0.77 | 0.26 | 0.29 | NA   | 0.15 |
| chr17 | 34740208 | 34740442 | Rnf5          | ENSMUSG000000015478 | -4   | NA   | NA   | 0.25 | NA   | NA   | NA   |
| chr17 | 34987078 | 34987589 | Skiv2l        | ENSMUSG000000040356 | -196 | NA   | 0.15 | 0.11 | 0.13 | 0.22 | 0.15 |
| chr17 | 35183123 | 35183969 | Msh5          | ENSMUSG00000007035  | -81  | NA   | 0.26 | 0.17 | 0.33 | 0.13 | 0.18 |
| chr17 | 35293312 | 35293554 | Prrc2a        | ENSMUSG000000024393 | 721  | 1    | NA   | NA   | NA   | NA   | NA   |
| chr17 | 35373480 | 35373682 | Atp6v1g2      | ENSMUSG000000024403 | 74   | NA   | 0.1  | 0.1  | 0.18 | 0.16 | 0.15 |
| chr17 | 35653603 | 35654240 | Tcf19         | ENSMUSG000000050410 | -191 | 0.67 | 0.37 | 0.11 | 0.17 | NA   | 0.2  |
| chr17 | 35974005 | 35974223 | Tubb5         | ENSMUSG00000001525  | -109 | NA   | NA   | NA   | NA   | NA   | 0.5  |
| chr17 | 35978263 | 35978647 | Mdc1          | ENSMUSG000000061607 | -5   | 1    | 0.12 | 0.07 | 0.08 | NA   | 0.09 |
| chr17 | 36106354 | 36106917 | Abcf1         | ENSMUSG000000038762 | 71   | 1    | 0.55 | 0.3  | 0.67 | NA   | 0.67 |
| chr17 | 36178970 | 36179176 | H2-T22        | ENSMUSG000000056116 | 372  | NA   | 0.33 | 0.17 | 0.17 | NA   | 0.12 |
| chr17 | 36315914 | 36316274 | Gm6623        | ENSMUSG000000092374 | 35   | NA   | NA   | 0.09 | 0.2  | NA   | 0.11 |
| chr17 | 37095409 | 37095689 | Znrd1         | ENSMUSG000000036315 | -122 | NA   | NA   | 0.14 | 0.22 | 1    | 0.11 |
| chr17 | 41016961 | 41017232 | 9130008F23Rik | ENSMUSG000000054951 | 411  | NA   | NA   | 0.24 | 1    | NA   | 0.38 |
| chr17 | 46297735 | 46298015 | Gtbp2         | ENSMUSG000000023952 | -106 | NA   | NA   | 0.23 | NA   | 0.33 | 0.25 |
| chr17 | 46682927 | 46683384 | Cul9          | ENSMUSG000000040327 | 182  | NA   | 0.18 | 0.11 | 0.14 | 0.12 | 0.18 |
| chr17 | 46782934 | 46783464 | Mrpl2         | ENSMUSG000000002767 | 21   | NA   | 0.14 | 0.17 | 0.18 | 0.13 | 0.21 |
| chr17 | 47028232 | 47028434 | Tbcc          | ENSMUSG000000036430 | 763  | NA   | NA   | NA   | NA   | NA   | 0.6  |
| chr17 | 47639031 | 47639337 | Taf8          | ENSMUSG000000023980 | 52   | NA   | 0.09 | 0.11 | 0.3  | 0.36 | 0.15 |
| chr17 | 47730270 | 47730773 | Ccnd3         | ENSMUSG000000034165 | 105  | NA   | NA   | 1    | NA   | NA   | 1    |
| chr17 | 47731742 | 47731952 | Ccnd3         | ENSMUSG000000034165 | 1431 | NA   | NA   | NA   | 1    | NA   | NA   |
| chr17 | 49071967 | 49072215 | Lrfr2         | ENSMUSG000000040490 | 346  | NA   | 0.14 | 0.14 | 0.27 | 0.18 | 0.16 |
| chr17 | 49754338 | 49754776 | Kif6          | ENSMUSG000000023999 | 96   | 0.43 | 0.17 | 0.46 | 0.64 | NA   | 0.35 |
| chr17 | 55851690 | 55851993 | Pot1b         | ENSMUSG000000024174 | 85   | NA   | 1    | 0.2  | 0.2  | 0.12 | 0.15 |
| chr17 | 56017926 | 56018289 | Zfp119a       | ENSMUSG000000057835 | 20   | 1    | 0.33 | 0.1  | 0.2  | NA   | 0.24 |
| chr17 | 56031506 | 56031807 | Zfp959        | ENSMUSG000000003198 | 49   | NA   | NA   | 0.23 | 0.5  | NA   | 0.21 |

|       |          |          |               |                     |       |      |      |      |      |      |      |
|-------|----------|----------|---------------|---------------------|-------|------|------|------|------|------|------|
| chr17 | 56279000 | 56279506 | Sema6b        | ENSMUSG00000001227  | 513   | NA   | 1    | 0.24 | 0.31 | 0.92 | 0.39 |
| chr17 | 56281231 | 56281434 | Sema6b        | ENSMUSG00000001227  | -1566 | NA   | NA   | 0.15 | 0.6  | 0.33 | 0.16 |
| chr17 | 56301607 | 56301962 | Tnfaip8l1     | ENSMUSG000000044469 | -116  | NA   | NA   | 0.12 | 1    | NA   | 0.15 |
| chr17 | 56395370 | 56395652 | Fem1a         | ENSMUSG000000043683 | -705  | NA   | 1    | 0.09 | 0.17 | 0.31 | 0.17 |
| chr17 | 56970313 | 56970837 | Rfx2          | ENSMUSG000000024206 | -144  | NA   | 0.27 | 0.07 | 0.16 | 0.21 | 0.11 |
| chr17 | 57388709 | 57388959 | Trip10        | ENSMUSG000000019487 | -40   | NA   | NA   | 1    | 0.57 | NA   | 0.48 |
| chr17 | 57389998 | 57390248 | Trip10        | ENSMUSG000000019487 | 1198  | 1    | NA   | 0.15 | 0.15 | NA   | 0.26 |
| chr17 | 59152542 | 59152743 | Nudt12        | ENSMUSG000000024228 | 49    | NA   | 0.59 | 0.2  | 0.26 | 1    | 0.18 |
| chr17 | 63848298 | 63848529 | Fbxl17        | ENSMUSG000000023965 | 953   | NA   | 1    | 0.09 | 0.25 | NA   | 0.25 |
| chr17 | 71201038 | 71201353 | Tgif1         | ENSMUSG000000047407 | -121  | NA   | NA   | 0.33 | 0.67 | 0.42 | 0.37 |
| chr17 | 72952780 | 72952994 | Alk           | ENSMUSG000000055471 | 162   | 0.06 | 0.14 | 0.05 | 0.08 | NA   | 0.15 |
| chr17 | 73185556 | 73185815 | Ypel5         | ENSMUSG000000039770 | -359  | NA   | NA   | 0.12 | NA   | NA   | 0.5  |
| chr17 | 74794809 | 74795138 | Slc30a6       | ENSMUSG000000024069 | 1     | NA   | NA   | 0.07 | 0.1  | NA   | 0.2  |
| chr18 | 53404935 | 53405687 | Snx24         | ENSMUSG000000024535 | -5    | 0.15 | 0.15 | 0.11 | 0.16 | 0.04 | 0.13 |
| chr18 | 24761649 | 24762812 | Slc39a6       | ENSMUSG000000024270 | -436  | 0.34 | 0.18 | 0.11 | 0.16 | 0.1  | 0.11 |
| chr18 | 13131812 | 13132305 | Impact        | ENSMUSG000000024423 | 1297  | 0.57 | 0.39 | 0.45 | 0.47 | 0.31 | 0.31 |
| chr18 | 20903930 | 20904967 | B4galt6       | ENSMUSG000000056124 | 457   | 0.43 | 0.32 | 0.09 | 0.21 | 0.26 | 0.16 |
| chr18 | 37965652 | 37967138 | Pcdhga9       | ENSMUSG000000023036 | 331   | 0.64 | 0.28 | 0.15 | 0.22 | 0.19 | 0.18 |
| chr18 | 80909161 | 80910710 | Nfatc1        | ENSMUSG000000033016 | -125  | 0.32 | 0.16 | 0.1  | 0.17 | 0.12 | 0.13 |
| chr18 | 61370910 | 61371500 | Slc26a2       | ENSMUSG000000034320 | -171  | 0.36 | 0.27 | 0.1  | 0.17 | 0.12 | 0.24 |
| chr18 | 80665997 | 80667111 | Ctdp1         | ENSMUSG000000033323 | -120  | 0.29 | 0.18 | 0.13 | 0.15 | 0.11 | 0.15 |
| chr18 | 24629244 | 24629614 | 2700062C07Rik | ENSMUSG000000024273 | 67    | 0.33 | 0.16 | 0.12 | 0.24 | 0.09 | 0.16 |
| chr18 | 67550193 | 67551264 | Tubb6         | ENSMUSG00000001473  | 357   | 0.25 | 0.18 | 0.1  | 0.15 | 0.09 | 0.16 |
| chr18 | 24112901 | 24113598 | Zfp397        | ENSMUSG000000024276 | 60    | 0.27 | 0.4  | 0.11 | 0.17 | 0.06 | 0.17 |
| chr18 | 6135514  | 6136248  | Arhgap12      | ENSMUSG000000041225 | 215   | 0.21 | 0.1  | 0.12 | 0.13 | 0.07 | 0.17 |
| chr18 | 34783670 | 34784291 | Brd8          | ENSMUSG000000003778 | 227   | 1    | 0.17 | 0.2  | 0.16 | 0.17 | 0.17 |
| chr18 | 37650913 | 37651172 | Pcdhb18       | ENSMUSG000000048347 | 1859  | 0.97 | 0.72 | 0.64 | 0.79 | 0.53 | 0.58 |
| chr18 | 37249546 | 37250053 | Pcdha4        | ENSMUSG000000007440 | 9     | 0.08 | 0.11 | 0.18 | 0.17 | 0.38 | 0.19 |
| chr18 | 74375639 | 74376250 | Cxxc1         | ENSMUSG000000024560 | 159   | 0.37 | 0.27 | 0.09 | 0.13 | 0.14 | 0.17 |
| chr18 | 80243519 | 80244812 | Pard6g        | ENSMUSG000000056214 | 531   | 0.62 | 0.48 | 0.14 | 0.2  | 0.37 | 0.19 |

|       |          |          |          |                     |       |      |      |      |      |      |      |
|-------|----------|----------|----------|---------------------|-------|------|------|------|------|------|------|
| chr18 | 37923046 | 37923528 | Pcdhga9  | ENSMUSG00000023036  | -1947 | 1    | 0.95 | 0.75 | 0.78 | 0.48 | 0.56 |
| chr18 | 32227236 | 32227951 | lws1     | ENSMUSG00000024384  | 205   | 0.22 | 0.1  | 0.08 | 0.14 | 0.07 | 0.12 |
| chr18 | 24363770 | 24365000 | Galnt1   | ENSMUSG00000000420  | 540   | 0.17 | 0.11 | 0.08 | 0.11 | 0.1  | 0.12 |
| chr18 | 37803573 | 37803964 | Taf7     | ENSMUSG000000051316 | 90    | 0.54 | 0.27 | 0.16 | 0.24 | 0.18 | 0.2  |
| chr18 | 36885330 | 36885887 | Cd14     | ENSMUSG000000051439 | 782   | 1    | 1    | 0.32 | 0.53 | 0.16 | 0.15 |
| chr18 | 70631891 | 70632261 | Stard6   | ENSMUSG000000079608 | -32   | 0.22 | 0.08 | 0.11 | 0.19 | 0.08 | 0.15 |
| chr18 | 14840609 | 14841819 | Ss18     | ENSMUSG000000037013 | 61    | 0.13 | 0.09 | 0.09 | 0.1  | 0.07 | 0.11 |
| chr18 | 61714634 | 61715561 | Csnk1a1  | ENSMUSG000000024576 | 169   | 0.28 | 0.21 | 0.11 | 0.13 | 0.11 | 0.14 |
| chr18 | 44539944 | 44540795 | Dcp2     | ENSMUSG000000024472 | 215   | 0.21 | 0.16 | 0.1  | 0.12 | 0.09 | 0.12 |
| chr18 | 62707933 | 62708578 | Fbxo38   | ENSMUSG000000042211 | 142   | 0.27 | 0.67 | 0.12 | 0.17 | 0.06 | 0.17 |
| chr18 | 35862690 | 35862894 | Dnajc18  | ENSMUSG000000024350 | 6     | 0.5  | 0.2  | 0.13 | 0.24 | 0.14 | 0.19 |
| chr18 | 6516012  | 6516480  | Epc1     | ENSMUSG000000024240 | -140  | 1    | 0.47 | 0.17 | 0.24 | 0.15 | 0.17 |
| chr18 | 35821709 | 35821940 | Spat24   | ENSMUSG000000024352 | 16    | 1    | 0.21 | 0.13 | 0.14 | 0.28 | 0.14 |
| chr18 | 73862755 | 73863979 | Smad4    | ENSMUSG000000024515 | 67    | 0.16 | 0.12 | 0.08 | 0.17 | 0.1  | 0.12 |
| chr18 | 84854662 | 84855247 | Cndp2    | ENSMUSG000000024644 | 61    | 0.25 | 0.11 | 0.12 | 0.16 | 0.11 | 0.16 |
| chr18 | 10706207 | 10707043 | Abhd3    | ENSMUSG000000002475 | 69    | 0.45 | 0.12 | 0.13 | 0.18 | 0.2  | 0.15 |
| chr18 | 84256786 | 84258118 | Zadh2    | ENSMUSG000000049090 | -98   | 0.33 | 0.3  | 0.11 | 0.14 | 0.17 | 0.11 |
| chr18 | 56732455 | 56733213 | Phax     | ENSMUSG000000008301 | 358   | 0.17 | 0.13 | 0.24 | 0.31 | 0.08 | 0.18 |
| chr18 | 34532545 | 34533188 | Reep5    | ENSMUSG000000005873 | 203   | 0.22 | 0.08 | 0.13 | 0.16 | 0.11 | 0.11 |
| chr18 | 7868551  | 7870000  | Wac      | ENSMUSG000000024283 | 445   | 0.16 | 0.09 | 0.09 | 0.15 | 0.1  | 0.15 |
| chr18 | 57514291 | 57514878 | Prrc1    | ENSMUSG000000024594 | 197   | 0.44 | 0.42 | 0.11 | 0.18 | 0.24 | 0.13 |
| chr18 | 12464003 | 12464362 | Ankrd29  | ENSMUSG000000057766 | -35   | 0.38 | 0.26 | 0.11 | 0.19 | 0.1  | 0.14 |
| chr18 | 61336194 | 61336881 | Hmgxb3   | ENSMUSG000000024622 | 167   | 0.18 | 0.22 | 0.09 | 0.09 | 0.08 | 0.14 |
| chr18 | 66033030 | 66033387 | Grp      | ENSMUSG000000024517 | 60    | 1    | 0.12 | 0.11 | 0.24 | 0.27 | 0.1  |
| chr18 | 33623455 | 33624099 | D0H4S114 | ENSMUSG000000042834 | -94   | 0.2  | 0.06 | 0.11 | 0.05 | 0.06 | 0.1  |
| chr18 | 90679327 | 90679929 | Tmx3     | ENSMUSG000000024614 | 82    | 0.5  | 0.48 | 0.1  | 0.1  | 0.08 | 0.13 |
| chr18 | 42434599 | 42435687 | Rbm27    | ENSMUSG000000024491 | 136   | 0.28 | 0.24 | 0.16 | 0.2  | 0.15 | 0.26 |
| chr18 | 20716502 | 20716999 | Dsg2     | ENSMUSG000000044393 | 175   | 0.51 | 0.44 | 0.21 | 0.4  | 0.29 | 0.24 |
| chr18 | 58037637 | 58039312 | Slc12a2  | ENSMUSG000000024597 | 142   | 0.15 | 0.15 | 0.1  | 0.15 | 0.09 | 0.14 |
| chr18 | 21054172 | 21055068 | Trappc8  | ENSMUSG000000033382 | -41   | 0.16 | 0.1  | 0.09 | 0.16 | 0.07 | 0.12 |

|       |          |          |               |                    |      |      |      |      |      |      |      |
|-------|----------|----------|---------------|--------------------|------|------|------|------|------|------|------|
| chr18 | 73731666 | 73733626 | Mex3c         | ENSMUSG00000037253 | -52  | 0.16 | 0.14 | 0.1  | 0.12 | 0.11 | 0.11 |
| chr18 | 31768996 | 31769619 | B930094E09Rik | ENSMUSG00000092124 | 141  | 0.17 | 0.09 | 0.12 | 0.15 | 0.09 | 0.11 |
| chr18 | 37646188 | 37646868 | Pcdhb17       | ENSMUSG00000046387 | 1853 | 1    | 1    | 0.72 | 0.74 | 0.48 | 0.61 |
| chr18 | 46756938 | 46757443 | Tmed7         | ENSMUSG00000033184 | -222 | 0.25 | 0.1  | 0.11 | 0.21 | 0.15 | 0.14 |
| chr18 | 75856232 | 75857208 | Ctif          | ENSMUSG00000052928 | 488  | 0.65 | 0.39 | 0.17 | 0.25 | 0.36 | 0.25 |
| chr18 | 21159702 | 21161037 | Rnf138        | ENSMUSG00000024317 | 527  | 0.21 | 0.11 | 0.1  | 0.17 | 0.12 | 0.12 |
| chr18 | 52927754 | 52928643 | Sncap         | ENSMUSG00000024534 | 229  | 0.13 | 0.14 | 0.08 | 0.11 | 0.06 | 0.12 |
| chr18 | 33954311 | 33954805 | 2410004N09Rik | ENSMUSG00000087590 | -17  | 0.29 | 0.14 | 0.09 | 0.19 | 0.07 | 0.11 |
| chr18 | 78033354 | 78033853 | Pstpip2       | ENSMUSG00000025429 | 319  | 0.14 | 0.07 | 0.09 | 0.12 | 0.06 | 0.12 |
| chr18 | 35812009 | 35814983 | Gm1614        | ENSMUSG00000073600 | 1345 | 0.22 | 0.2  | 0.15 | 0.16 | 0.15 | 0.18 |
| chr18 | 53903922 | 53904488 | Cep120        | ENSMUSG00000048799 | 2    | 0.26 | 0.19 | 0.09 | 0.15 | 0.14 | 0.12 |
| chr18 | 60720242 | 60720795 | Rbm22         | ENSMUSG00000024604 | 128  | 0.25 | 0.21 | 0.11 | 0.17 | 0.15 | 0.12 |
| chr18 | 10617686 | 10618212 | Snrpd1        | ENSMUSG00000002477 | 155  | 0.22 | 0.11 | 0.1  | 0.13 | 0.1  | 0.16 |
| chr18 | 5334178  | 5334973  | Zfp438        | ENSMUSG00000050945 | -138 | 0.1  | 0.23 | 0.1  | 0.22 | 0.26 | 0.17 |
| chr18 | 24687951 | 24688829 | Rprd1a        | ENSMUSG00000040446 | 315  | 0.17 | 0.34 | 0.14 | 0.18 | 0.29 | 0.13 |
| chr18 | 43597521 | 43598081 | Dpysl3        | ENSMUSG00000024501 | 139  | 0.22 | 0.29 | 0.11 | 0.15 | 0.1  | 0.12 |
| chr18 | 12394721 | 12395225 | Npc1          | ENSMUSG00000024413 | -158 | 0.27 | 0.24 | 0.15 | 0.13 | 0.1  | 0.16 |
| chr18 | 70212716 | 70212953 | Rab27b        | ENSMUSG00000024511 | 408  | 0.29 | 0.15 | 0.24 | 0.12 | 0.16 | 0.2  |
| chr18 | 75160081 | 75160650 | Rpl17         | ENSMUSG00000062328 | 234  | 0.21 | 0.15 | 0.13 | 0.19 | 0.1  | 0.19 |
| chr18 | 54021437 | 54022568 | Csnk1g3       | ENSMUSG00000073563 | 235  | 0.21 | 0.11 | 0.11 | 0.14 | 0.13 | 0.13 |
| chr18 | 76400816 | 76401821 | Smad2         | ENSMUSG00000024563 | 84   | 0.1  | 0.08 | 0.09 | 0.1  | 0.06 | 0.14 |
| chr18 | 62339207 | 62340103 | Adrb2         | ENSMUSG00000045730 | -42  | 0.36 | 0.36 | 0.14 | 0.27 | 0.15 | 0.27 |
| chr18 | 67883559 | 67884391 | Ptpn2         | ENSMUSG00000024539 | 252  | 0.2  | 0.14 | 0.12 | 0.12 | 0.08 | 0.13 |
| chr18 | 46371584 | 46371887 | Trim36        | ENSMUSG00000033949 | 526  | 0.5  | 0.25 | 0.09 | 0.23 | 0.11 | 0.13 |
| chr18 | 67247883 | 67248513 | Gnal          | ENSMUSG00000024524 | 208  | 0.05 | 0.08 | 0.07 | 0.12 | 0.1  | 0.1  |
| chr18 | 21809999 | 21810210 | 4930426D05Rik | ENSMUSG00000043168 | 38   | 0.21 | 0.2  | 0.17 | 0.23 | 0.05 | 0.2  |
| chr18 | 37925938 | 37926637 | Pcdhga9       | ENSMUSG00000023036 | 1053 | 0.57 | 0.95 | 0.64 | 0.74 | 1    | 0.53 |
| chr18 | 81130316 | 81130881 | Atp9b         | ENSMUSG00000024566 | 124  | 0.23 | 0.25 | 0.12 | 0.18 | 0.42 | 0.13 |
| chr18 | 68092665 | 68093922 | D18Ert653e    | ENSMUSG00000024544 | 382  | 0.22 | 0.17 | 0.12 | 0.1  | 0.11 | 0.11 |
| chr18 | 73913800 | 73914306 | Elac1         | ENSMUSG00000036941 | 80   | 0.13 | 0.09 | 0.1  | 0.13 | 0.07 | 0.11 |

|       |          |          |               |                    |       |      |      |      |      |      |      |
|-------|----------|----------|---------------|--------------------|-------|------|------|------|------|------|------|
| chr18 | 35721658 | 35722716 | Matr3         | ENSMUSG00000037236 | 375   | 0.36 | 0.23 | 0.15 | 0.16 | 0.1  | 0.12 |
| chr18 | 73782742 | 73782997 | AC134447.1    | ENSMUSG00000076941 | -1713 | 0.14 | 0.24 | 0.1  | 0.08 | 0.05 | 0.19 |
| chr18 | 13099929 | 13100465 | Osbpl1a       | ENSMUSG00000044252 | 89    | 0.14 | 0.13 | 0.1  | 0.1  | 0.07 | 0.09 |
| chr18 | 36674858 | 36675728 | Hbegf         | ENSMUSG00000024486 | 166   | 0.32 | 0.25 | 0.2  | 0.32 | 0.17 | 0.25 |
| chr18 | 39152563 | 39153486 | Arhgap26      | ENSMUSG00000036452 | 225   | 0.13 | 0.18 | 0.08 | 0.11 | 0.07 | 0.11 |
| chr18 | 46901052 | 46902177 | Atg12         | ENSMUSG00000032905 | -381  | 0.08 | 0.08 | 0.1  | 0.09 | 0.13 | 0.16 |
| chr18 | 9957848  | 9958466  | Thoc1         | ENSMUSG00000024287 | -21   | 0.08 | 0.38 | 0.09 | 0.2  | 0.56 | 0.23 |
| chr18 | 38369340 | 38369774 | Pcdh1         | ENSMUSG00000051375 | -141  | 0.88 | 0.57 | 0.2  | 0.36 | 0.43 | 0.22 |
| chr18 | 76219125 | 76219456 | Zbtb7c        | ENSMUSG00000044646 | 178   | 0.09 | 0.11 | 0.09 | 0.12 | 0.17 | 0.17 |
| chr18 | 75526143 | 75528663 | Gm20544       | ENSMUSG00000092569 | -661  | 0.09 | 0.11 | 0.11 | 0.15 | 0.12 | 0.11 |
| chr18 | 68459551 | 68460098 | 4933403F05Rik | ENSMUSG00000038121 | 32    | 0.14 | 0.4  | 0.18 | 0.16 | 0.47 | 0.12 |
| chr18 | 32322460 | 32323254 | Map3k2        | ENSMUSG00000024383 | 114   | 0.26 | 0.16 | 0.11 | 0.13 | 0.16 | 0.14 |
| chr18 | 89063203 | 89063821 | Socs6         | ENSMUSG00000056153 | 96    | 0.28 | 0.39 | 0.18 | 0.28 | 0.18 | 0.24 |
| chr18 | 7004626  | 7004904  | Mkx           | ENSMUSG00000061013 | -53   | 0.15 | 0.12 | 0.15 | 0.2  | 0.08 | 0.18 |
| chr18 | 53335811 | 53336681 | Snx2          | ENSMUSG00000034484 | 227   | 0.07 | 0.11 | 0.11 | 0.1  | 0.23 | 0.18 |
| chr18 | 63851439 | 63852382 | Txn1          | ENSMUSG00000024583 | 103   | 0.28 | 0.33 | 0.15 | 0.19 | 0.2  | 0.15 |
| chr18 | 36719141 | 36721025 | Ankhd1        | ENSMUSG00000024483 | 442   | 0.11 | 0.11 | 0.11 | 0.16 | 0.08 | 0.13 |
| chr18 | 66450898 | 66451662 | Gm15958       | ENSMUSG00000085055 | 352   | 1    | 0.67 | 0.14 | 0.2  | 0.18 | 0.13 |
| chr18 | 22502210 | 22503471 | Asxl3         | ENSMUSG00000045215 | -544  | 0.2  | 0.2  | 0.16 | 0.17 | 0.11 | 0.22 |
| chr18 | 37915342 | 37915869 | Pcdhga9       | ENSMUSG00000023036 | 178   | 1    | 0.83 | 0.54 | 0.78 | 0.33 | 0.3  |
| chr18 | 49992175 | 49992874 | Dmxl1         | ENSMUSG00000037416 | -143  | 0.07 | 0.12 | 0.1  | 0.19 | 0.13 | 0.14 |
| chr18 | 57134755 | 57135078 | C330018D20Rik | ENSMUSG00000024592 | -16   | 0.3  | 0.21 | 0.09 | 0.24 | 0.15 | 0.19 |
| chr18 | 81182272 | 81184702 | Sall3         | ENSMUSG00000024565 | -170  | 0.26 | 0.23 | 0.1  | 0.17 | 0.18 | 0.15 |
| chr18 | 6489940  | 6491261  | Mir1893       | ENSMUSG00000084514 | 44    | 0.2  | 0.11 | 0.11 | 0.19 | 0.15 | 0.16 |
| chr18 | 35658283 | 35658575 | Sil1          | ENSMUSG00000024357 | 150   | 0.15 | 0.2  | 0.08 | 0.22 | 0.05 | 0.1  |
| chr18 | 61885708 | 61886243 | Grpel2        | ENSMUSG00000024580 | 10    | 0.4  | 0.36 | 0.13 | 0.15 | 0.23 | 0.18 |
| chr18 | 64820145 | 64821164 | Atp8b1        | ENSMUSG00000039529 | 0     | 0.11 | 0.16 | 0.1  | 0.13 | 0.18 | 0.16 |
| chr18 | 15220365 | 15222848 | Kctd1         | ENSMUSG00000036225 | 485   | 0.11 | 0.14 | 0.11 | 0.14 | 0.16 | 0.14 |
| chr18 | 39648608 | 39650544 | Nr3c1         | ENSMUSG00000024431 | -639  | 0.4  | 0.09 | 0.09 | 0.17 | 0.09 | 0.1  |
| chr18 | 36942620 | 36943177 | Hars2         | ENSMUSG00000019143 | 236   | 0.28 | 0.15 | 0.09 | 0.18 | 0.13 | 0.14 |



|       |          |          |          |                    |      |      |      |      |      |      |      |
|-------|----------|----------|----------|--------------------|------|------|------|------|------|------|------|
| chr18 | 46440120 | 46440522 | Pggt1b   | ENSMUSG00000024477 | 183  | 0.26 | 0.11 | 0.11 | 0.16 | 0.14 | 0.15 |
| chr18 | 74602128 | 74602682 | Myo5b    | ENSMUSG00000025885 | 214  | 0.11 | 0.14 | 0.08 | 0.16 | 0.07 | 0.11 |
| chr18 | 37166257 | 37166533 | Pcdha4   | ENSMUSG00000007440 | 1421 | 1    | 0.5  | 0.63 | 0.69 | 0.5  | 0.68 |
| chr18 | 80904330 | 80905402 | Nfatc1   | ENSMUSG00000033016 | 46   | 0.18 | 0.18 | 0.11 | 0.2  | 0.13 | 0.14 |
| chr18 | 32719290 | 32719609 | Gypc     | ENSMUSG00000090523 | 185  | 0.11 | 0.09 | 0.08 | 0.17 | 0.19 | 0.12 |
| chr18 | 35113711 | 35114718 | Hspa9    | ENSMUSG00000024359 | -203 | 0.19 | 0.1  | 0.11 | 0.14 | 0.08 | 0.16 |
| chr18 | 37658311 | 37658863 | Pcdhb19  | ENSMUSG00000043313 | 1936 | 1    | 0.78 | 0.92 | 1    | 0.79 | 0.92 |
| chr18 | 78006327 | 78006585 | Haus1    | ENSMUSG00000041840 | 63   | 0.27 | 0.24 | 0.13 | 0.17 | 0.13 | 0.2  |
| chr18 | 78012652 | 78013003 | Atp5a1   | ENSMUSG00000025428 | 132  | 0.22 | 0.15 | 0.11 | 0.15 | 0.14 | 0.13 |
| chr18 | 86564604 | 86565065 | Neto1    | ENSMUSG00000050321 | 490  | 0.5  | 0.12 | 0.12 | 0.17 | 0.11 | 0.14 |
| chr18 | 35020128 | 35020876 | Egr1     | ENSMUSG00000038418 | -359 | 0.15 | 0.16 | 0.11 | 0.14 | 0.24 | 0.12 |
| chr18 | 46887376 | 46887932 | Cdo1     | ENSMUSG00000033022 | 342  | 0.55 | 0.31 | 0.15 | 0.13 | 0.22 | 0.12 |
| chr18 | 66161973 | 66162400 | Lman1    | ENSMUSG00000041891 | 89   | 0.06 | 0.15 | 0.1  | 0.13 | 0.18 | 0.14 |
| chr18 | 73974775 | 73975607 | Me2      | ENSMUSG00000024556 | -145 | 0.08 | 0.06 | 0.08 | 0.1  | 0.05 | 0.1  |
| chr18 | 3507132  | 3508530  | Bambi    | ENSMUSG00000024232 | -124 | 0.22 | 0.19 | 0.13 | 0.17 | 0.15 | 0.2  |
| chr18 | 50212985 | 50213360 | Trnfaip8 | ENSMUSG00000062210 | 149  | 0.18 | 0.1  | 0.17 | 0.21 | 0.1  | 0.12 |
| chr18 | 38578554 | 38579024 | Ndfip1   | ENSMUSG00000024425 | 160  | 0.12 | 0.26 | 0.18 | 0.14 | 0.19 | 0.17 |
| chr18 | 43552344 | 43552935 | Dpysl3   | ENSMUSG00000024501 | 392  | 0.72 | 0.44 | 0.15 | 0.18 | 0.54 | 0.15 |
| chr18 | 34936565 | 34937379 | Kdm3b    | ENSMUSG00000038773 | 310  | 0.17 | 0.28 | 0.11 | 0.13 | 0.13 | 0.14 |
| chr18 | 37107263 | 37107813 | Pcdha3   | ENSMUSG00000091969 | 1737 | 0.79 | 0.97 | 0.75 | 0.9  | 0.66 | 0.7  |
| chr18 | 58995833 | 58997629 | Adamts19 | ENSMUSG00000053441 | 313  | 0.06 | 0.13 | 0.11 | 0.15 | 0.08 | 0.17 |
| chr18 | 60933976 | 60934688 | Rps14    | ENSMUSG00000024608 | 168  | 0.1  | 0.13 | 0.1  | 0.16 | 0.07 | 0.16 |
| chr18 | 37834155 | 37834450 | Pcdhga9  | ENSMUSG00000023036 | 313  | 1    | NA   | 0.65 | NA   | 0.5  | 0.52 |
| chr18 | 61867055 | 61867327 | Pcyox1l  | ENSMUSG00000024579 | 98   | 0.22 | 0.2  | 0.11 | 0.13 | 0.32 | 0.16 |
| chr18 | 74427585 | 74428166 | Mbd1     | ENSMUSG00000024561 | -51  | 0.18 | 0.27 | 0.12 | 0.24 | 0.12 | 0.14 |
| chr18 | 61696037 | 61696331 | Arhgef37 | ENSMUSG00000045094 | 6    | 0.18 | 0.44 | 0.12 | 0.15 | 0.41 | 0.16 |
| chr18 | 77094824 | 77095208 | Skor2    | ENSMUSG00000091519 | -128 | 0.07 | 0.1  | 0.12 | 0.18 | 0.1  | 0.16 |
| chr18 | 23910759 | 23911132 | Gm15972  | ENSMUSG00000086287 | -139 | 0.17 | 0.17 | 0.1  | 0.16 | 0.07 | 0.11 |
| chr18 | 36903788 | 36904549 | Ndufa2   | ENSMUSG00000014294 | 34   | 0.29 | 0.25 | 0.12 | 0.06 | 0.08 | 0.13 |
| chr18 | 66618037 | 66618608 | Pmaip1   | ENSMUSG00000024521 | 64   | 0.13 | 0.2  | 0.15 | 0.14 | 0.09 | 0.25 |

|       |          |          |               |                    |      |      |      |      |      |      |      |
|-------|----------|----------|---------------|--------------------|------|------|------|------|------|------|------|
| chr18 | 12492362 | 12492831 | Lama3         | ENSMUSG00000024421 | 63   | 0.22 | 0.16 | 0.11 | 0.17 | 0.13 | 0.17 |
| chr18 | 37665541 | 37666054 | Pcdhb20       | ENSMUSG00000046191 | 1871 | 0.79 | 0.89 | 0.73 | 0.87 | 0.95 | 0.85 |
| chr18 | 53577444 | 53577851 | Ppic          | ENSMUSG00000024538 | 14   | 0.17 | 0.13 | 0.09 | 0.22 | 0.1  | 0.12 |
| chr18 | 56591779 | 56592048 | Gramd3        | ENSMUSG00000001700 | 127  | 0.16 | 0.24 | 0.11 | 0.12 | 0.23 | 0.1  |
| chr18 | 56866946 | 56868707 | Lmnb1         | ENSMUSG00000024590 | 359  | 0.18 | 0.14 | 0.1  | 0.2  | 0.14 | 0.14 |
| chr18 | 84758837 | 84759574 | Zfp407        | ENSMUSG00000048410 | -309 | 0.05 | 0.19 | 0.13 | 0.18 | 0.12 | 0.19 |
| chr18 | 36356203 | 36357188 | Nrg2          | ENSMUSG00000060275 | 119  | 0.11 | 0.13 | 0.09 | 0.18 | 0.16 | 0.15 |
| chr18 | 63137409 | 63137918 | Napg          | ENSMUSG00000024581 | 173  | 0.25 | 0.21 | 0.09 | 0.2  | 0.08 | 0.18 |
| chr18 | 67770192 | 67770954 | Spire1        | ENSMUSG00000024533 | -130 | 0.2  | 0.3  | 0.15 | 0.13 | 0.16 | 0.13 |
| chr18 | 13020644 | 13021103 | Osbpl1a       | ENSMUSG00000044252 | 59   | 0.61 | 1    | 0.09 | 0.18 | 0.89 | 0.11 |
| chr18 | 35758170 | 35758960 | Paip2         | ENSMUSG00000037058 | 294  | 0.2  | 0.16 | 0.15 | 0.22 | 0.14 | 0.19 |
| chr18 | 38760300 | 38761208 | Spry4         | ENSMUSG00000024427 | 168  | 0.23 | 0.08 | 0.09 | 0.17 | 0.17 | 0.2  |
| chr18 | 77951941 | 77953311 | 8030462N17Rik | ENSMUSG00000047466 | 123  | 0.29 | 0.13 | 0.12 | 0.14 | 0.21 | 0.15 |
| chr18 | 10181246 | 10182284 | Rock1         | ENSMUSG00000024290 | 25   | 0.2  | 0.25 | 0.14 | 0.14 | 0.26 | 0.14 |
| chr18 | 12287314 | 12287678 | Riok3         | ENSMUSG00000024404 | 137  | 0.24 | 0.17 | 0.07 | 0.22 | 0.11 | 0.22 |
| chr18 | 33098799 | 33099318 | 2310026I22Rik | ENSMUSG00000087447 | -182 | 0.2  | 0.15 | 0.1  | 0.16 | 0.13 | 0.17 |
| chr18 | 38114533 | 38115792 | Hdac3         | ENSMUSG00000024454 | -577 | 0.19 | 0.18 | 0.18 | 0.15 | 0.25 | 0.2  |
| chr18 | 38456220 | 38456839 | Rnf14         | ENSMUSG00000060450 | 240  | 0.11 | 0.17 | 0.1  | 0.11 | 0.08 | 0.13 |
| chr18 | 65740244 | 65741072 | Zfp532        | ENSMUSG00000042439 | 774  | 0.14 | 0.17 | 0.07 | 0.08 | 0.11 | 0.12 |
| chr18 | 84254759 | 84255542 | Tshz1         | ENSMUSG00000046982 | 632  | 0.1  | 0.09 | 0.1  | 0.09 | 0.09 | 0.09 |
| chr18 | 3336787  | 3338071  | Crem          | ENSMUSG00000063889 | -368 | 0.27 | 0.19 | 0.11 | 0.15 | 0.2  | 0.12 |
| chr18 | 9707415  | 9708178  | Colec12       | ENSMUSG00000036103 | 150  | 0.06 | 0.13 | 0.11 | 0.22 | 0.11 | 0.14 |
| chr18 | 35930986 | 35931855 | Ube2d2        | ENSMUSG00000091896 | 207  | 0.18 | 0.11 | 0.09 | 0.12 | 0.13 | 0.15 |
| chr18 | 37091222 | 37091869 | Pcdha4        | ENSMUSG00000007440 | 1606 | 1    | 1    | 0.72 | 0.88 | 0.75 | 0.6  |
| chr18 | 67448845 | 67449252 | Impa2         | ENSMUSG00000024525 | 141  | 0.2  | 0.09 | 0.13 | 0.14 | 0.13 | 0.18 |
| chr18 | 67800496 | 67801438 | Cep76         | ENSMUSG00000073542 | 23   | 0.11 | 0.16 | 0.1  | 0.14 | 0.08 | 0.12 |
| chr18 | 75979200 | 75980402 | Zbtb7c        | ENSMUSG00000044646 | -31  | 0.19 | 0.22 | 0.09 | 0.16 | 0.23 | 0.14 |
| chr18 | 10029760 | 10030100 | Usp14         | ENSMUSG00000047879 | 90   | 0.82 | 0.69 | 0.32 | 0.39 | 0.61 | 0.1  |
| chr18 | 51277271 | 51277641 | Prr16         | ENSMUSG00000073565 | 64   | 1    | 0.13 | 0.09 | 0.15 | 0.15 | 0.1  |
| chr18 | 36829738 | 36829993 | Sra1          | ENSMUSG0000006050  | 65   | 0.1  | 0.05 | 0.08 | 0.23 | 0.04 | 0.15 |

|       |          |          |               |                    |      |      |      |      |      |      |      |
|-------|----------|----------|---------------|--------------------|------|------|------|------|------|------|------|
| chr18 | 37674958 | 37675441 | Pcdhb21       | ENSMUSG00000044022 | 1893 | 0.86 | 0.53 | 0.8  | 1    | 0.75 | 0.67 |
| chr18 | 74223486 | 74225196 | Mapk4         | ENSMUSG00000024558 | -295 | 0.23 | 0.28 | 0.18 | 0.15 | 0.19 | 0.17 |
| chr18 | 35091051 | 35092213 | Etf1          | ENSMUSG00000024360 | 25   | 0.13 | 0.28 | 0.11 | 0.11 | 0.09 | 0.14 |
| chr18 | 14941426 | 14942220 | Taf4b         | ENSMUSG00000054321 | 69   | 0.1  | 0.22 | 0.11 | 0.16 | 0.13 | 0.1  |
| chr18 | 44821300 | 44821907 | A930012L18Rik | ENSMUSG00000086579 | 284  | 0.3  | 0.23 | 0.18 | 0.17 | 0.24 | 0.16 |
| chr18 | 61558152 | 61560396 | Ppargc1b      | ENSMUSG00000033871 | 780  | 0.09 | 0.17 | 0.11 | 0.13 | 0.11 | 0.16 |
| chr18 | 12327188 | 12327485 | 3110002H16Rik | ENSMUSG00000024410 | 110  | 0.08 | 0.06 | 0.1  | 0.08 | 0.11 | 0.1  |
| chr18 | 31919015 | 31920294 | Ammecr1l      | ENSMUSG00000041915 | 120  | 0.17 | 0.12 | 0.17 | 0.2  | 0.11 | 0.18 |
| chr18 | 45718969 | 45720297 | Kcnn2         | ENSMUSG00000054477 | -175 | 0.12 | 0.19 | 0.11 | 0.11 | 0.15 | 0.13 |
| chr18 | 75980667 | 75981039 | Zbtb7c        | ENSMUSG00000044646 | 1021 | 0.25 | 0.25 | 0.18 | 0.27 | 0.19 | 0.23 |
| chr18 | 34490529 | 34491192 | Srp19         | ENSMUSG00000014504 | 83   | 0.12 | 0.11 | 0.08 | 0.13 | 0.14 | 0.12 |
| chr18 | 60908268 | 60908632 | Ndst1         | ENSMUSG00000054008 | -146 | 0.1  | 0.13 | 0.11 | 0.16 | 0.07 | 0.14 |
| chr18 | 77424098 | 77424855 | St8sia5       | ENSMUSG00000025425 | -110 | 0.12 | 0.14 | 0.09 | 0.13 | 0.09 | 0.11 |
| chr18 | 11815634 | 11816547 | Rbbp8         | ENSMUSG00000041238 | 154  | 0.31 | 0.22 | 0.11 | 0.26 | 0.18 | 0.16 |
| chr18 | 34165549 | 34167191 | Epb4.114a     | ENSMUSG00000024376 | 490  | 0.11 | 0.16 | 0.14 | 0.19 | 0.13 | 0.19 |
| chr18 | 84889444 | 84889862 | Fam69c        | ENSMUSG00000047992 | 19   | 0.1  | 0.05 | 0.09 | 0.14 | 0.07 | 0.11 |
| chr18 | 32070112 | 32071012 | Sft2d3        | ENSMUSG00000044982 | 995  | 0.17 | 0.29 | 0.11 | 0.16 | 0.11 | 0.1  |
| chr18 | 32996855 | 32997275 | Wdr36         | ENSMUSG00000038299 | 186  | 0.22 | 0.14 | 0.15 | 0.17 | 0.13 | 0.08 |
| chr18 | 21457979 | 21459201 | Fam59a        | ENSMUSG00000042680 | 49   | 0.12 | 0.1  | 0.11 | 0.14 | 0.09 | 0.13 |
| chr18 | 4634914  | 4635552  | 9430020K01Rik | ENSMUSG00000033960 | 306  | 0.12 | 0.11 | 0.09 | 0.11 | 0.09 | 0.09 |
| chr18 | 36508125 | 36508906 | 0610010O12Rik | ENSMUSG00000046727 | 164  | 0.26 | 0.16 | 0.08 | 0.15 | 0.22 | 0.15 |
| chr18 | 4921679  | 4922355  | Svil          | ENSMUSG00000024236 | 293  | 0.16 | 0.17 | 0.11 | 0.18 | 0.11 | 0.17 |
| chr18 | 24867732 | 24868851 | Gm9955        | ENSMUSG00000054745 | -442 | 0.13 | 0.15 | 0.09 | 0.16 | 0.11 | 0.12 |
| chr18 | 7626531  | 7626948  | Mpp7          | ENSMUSG00000057440 | 122  | 0.2  | 0.13 | 0.1  | 0.22 | 0.16 | 0.1  |
| chr18 | 70727723 | 70728234 | Mbd2          | ENSMUSG00000024513 | 135  | 0.07 | 0.18 | 0.09 | 0.12 | 0.11 | 0.13 |
| chr18 | 43367108 | 43367410 | Stk32a        | ENSMUSG00000039954 | -92  | 0.5  | 0.15 | 0.07 | 0.14 | 0.11 | 0.14 |
| chr18 | 23962260 | 23962811 | Mapre2        | ENSMUSG00000024277 | 50   | 0.1  | 0.23 | 0.11 | 0.19 | 0.13 | 0.18 |
| chr18 | 35000208 | 35000508 | Reep2         | ENSMUSG00000038555 | 46   | 0.35 | 0.56 | 0.09 | 0.36 | 0.48 | 0.13 |
| chr18 | 38094574 | 38095338 | Diap1         | ENSMUSG00000024456 | 79   | 0.16 | 0.18 | 0.12 | 0.19 | 0.22 | 0.18 |
| chr18 | 34380452 | 34381215 | Apc           | ENSMUSG00000005871 | 255  | 0.08 | 0.13 | 0.07 | 0.09 | 0.06 | 0.11 |

|       |          |          |         |                    |      |      |      |      |      |      |      |
|-------|----------|----------|---------|--------------------|------|------|------|------|------|------|------|
| chr18 | 69503879 | 69504193 | Tcf4    | ENSMUSG00000053477 | -110 | 0.15 | 0.28 | 0.1  | 0.14 | 0.12 | 0.14 |
| chr18 | 61946128 | 61946539 | Afap111 | ENSMUSG00000033032 | -68  | 0.08 | 0.07 | 0.08 | 0.11 | 0.06 | 0.12 |
| chr18 | 67364923 | 67365786 | Chmp1b  | ENSMUSG00000073543 | 280  | 0.2  | 0.49 | 0.2  | 0.31 | 0.33 | 0.16 |
| chr18 | 67959561 | 67960035 | Cep192  | ENSMUSG00000024542 | 37   | 0.23 | 0.23 | 0.13 | 0.2  | 0.19 | 0.16 |
| chr18 | 9449437  | 9450328  | Ccny    | ENSMUSG00000024286 | 266  | 0.1  | 0.08 | 0.1  | 0.1  | 0.12 | 0.12 |
| chr18 | 77168641 | 77169032 | Ier3ip1 | ENSMUSG00000090000 | 80   | 0.18 | 0.17 | 0.08 | 0.13 | 0.12 | 0.14 |
| chr18 | 75178304 | 75178950 | Dym     | ENSMUSG00000035765 | 201  | 0.1  | 0.08 | 0.09 | 0.16 | 0.08 | 0.15 |
| chr18 | 80397063 | 80397483 | Rbfa    | ENSMUSG00000024570 | 124  | 0.15 | 0.15 | 0.15 | 0.19 | 0.12 | 0.18 |
| chr18 | 80452784 | 80453663 | Pqlc1   | ENSMUSG00000034006 | 200  | 0.33 | 0.67 | 0.14 | 0.36 | 0.71 | 0.1  |
| chr18 | 24280058 | 24280539 | Ino80c  | ENSMUSG00000047989 | 38   | 0.11 | 0.28 | 0.1  | 0.19 | 0.09 | 0.14 |
| chr18 | 47528303 | 47528872 | Sema6a  | ENSMUSG00000019647 | -103 | 0.67 | 1    | 0.14 | 0.55 | 0.33 | 0.25 |
| chr18 | 6240805  | 6241594  | Kif5b   | ENSMUSG00000006740 | 269  | 0.16 | 0.26 | 0.15 | 0.19 | 0.15 | 0.21 |
| chr18 | 44971677 | 44972030 | Mcc     | ENSMUSG00000071856 | -17  | 0.14 | 0.08 | 0.14 | 0.08 | 0.05 | 0.13 |
| chr18 | 63545901 | 63546947 | Fam38b  | ENSMUSG00000041482 | -313 | 0.11 | 0.13 | 0.1  | 0.14 | 0.13 | 0.18 |
| chr18 | 65590129 | 65591132 | Malt1   | ENSMUSG00000032688 | 13   | 0.08 | 0.1  | 0.11 | 0.12 | 0.06 | 0.12 |
| chr18 | 77804012 | 77804459 | Rnf165  | ENSMUSG00000025427 | -360 | 0.5  | 0.07 | 0.08 | 0.12 | 0.13 | 0.12 |
| chr18 | 24812153 | 24812542 | Mocos   | ENSMUSG00000039616 | 155  | 0.11 | 0.08 | 0.12 | 0.12 | 0.15 | 0.13 |
| chr18 | 34666045 | 34666608 | Fam13b  | ENSMUSG00000036501 | 151  | 0.14 | 0.1  | 0.09 | 0.22 | 0.12 | 0.12 |
| chr18 | 57084569 | 57085607 | 3-Mar   | ENSMUSG00000032656 | 81   | 0.22 | 1    | 0.1  | 0.25 | 0.26 | 0.19 |
| chr18 | 89141351 | 89141565 | Rttn    | ENSMUSG00000023066 | 276  | 0.17 | 0.09 | 0.09 | 0.18 | 0.22 | 0.13 |
| chr18 | 34879851 | 34880123 | Gfra3   | ENSMUSG00000024366 | 54   | 0.27 | 0.46 | 0.12 | 0.38 | 0.33 | 0.18 |
| chr18 | 4920373  | 4921104  | Svil    | ENSMUSG00000024236 | 200  | 0.17 | 0.19 | 0.13 | 0.23 | 0.14 | 0.18 |
| chr18 | 35278148 | 35279158 | Ctnna1  | ENSMUSG00000037815 | 111  | 0.34 | 0.25 | 0.18 | 0.28 | 0.38 | 0.27 |
| chr18 | 61071713 | 61072137 | Arsi    | ENSMUSG00000036412 | 491  | 0.24 | 0.36 | 0.24 | 0.35 | 0.18 | 0.33 |
| chr18 | 12899788 | 12900077 | Cabyr   | ENSMUSG00000024430 | 99   | 0.08 | 0.14 | 0.09 | 0.17 | 0.15 | 0.12 |
| chr18 | 46684818 | 46685060 | Fem1c   | ENSMUSG00000033319 | 686  | 0.13 | 0.07 | 1    | 0.09 | 0.07 | 0.11 |
| chr18 | 15308288 | 15309762 | Kctd1   | ENSMUSG00000036225 | 930  | 0.16 | 0.13 | 0.1  | 0.14 | 0.18 | 0.12 |
| chr18 | 52688256 | 52689247 | Lox     | ENSMUSG00000024529 | 494  | 0.14 | 0.25 | 0.13 | 0.16 | 0.15 | 0.16 |
| chr18 | 67292719 | 67293823 | Gnal    | ENSMUSG00000024524 | -133 | 0.13 | 0.32 | 0.17 | 0.15 | 0.16 | 0.15 |
| chr18 | 46685256 | 46686003 | Fem1c   | ENSMUSG00000033319 | -4   | 0.08 | 0.09 | 0.09 | 0.16 | 0.06 | 0.13 |

|       |          |          |               |                    |      |      |      |      |      |      |      |
|-------|----------|----------|---------------|--------------------|------|------|------|------|------|------|------|
| chr18 | 50287855 | 50288247 | Hsd17b4       | ENSMUSG00000024507 | 196  | 0.27 | 0.41 | 0.15 | 0.16 | 0.24 | 0.15 |
| chr18 | 48206310 | 48206559 | Gm5506        | ENSMUSG00000059040 | 1445 | 1    | 0.91 | 0.86 | NA   | 0.93 | 0.95 |
| chr18 | 52625223 | 52625621 | Srfbp1        | ENSMUSG00000024528 | 75   | 0.37 | 0.26 | 0.07 | 0.19 | 0.35 | 0.14 |
| chr18 | 80492380 | 80493193 | Kcng2         | ENSMUSG00000059852 | 286  | 0.14 | 0.1  | 0.18 | 0.16 | 0.19 | 0.14 |
| chr18 | 56721626 | 56722277 | Aldh7a1       | ENSMUSG00000053644 | -100 | 0.47 | 0.29 | 0.16 | 0.29 | 0.58 | 0.2  |
| chr18 | 63081848 | 63082540 | Apccd1        | ENSMUSG00000071847 | 213  | 0.15 | 0.18 | 0.12 | 0.12 | 0.14 | 0.12 |
| chr18 | 80403288 | 80404150 | Gm16286       | ENSMUSG00000024571 | 215  | 0.1  | 0.1  | 0.1  | 0.1  | 0.12 | 0.18 |
| chr18 | 86882385 | 86882843 | Cbln2         | ENSMUSG00000024647 | 174  | 0.17 | 0.15 | 0.12 | 0.17 | 0.08 | 0.06 |
| chr18 | 35989188 | 35991665 | Cxxc5         | ENSMUSG00000046668 | 954  | 0.15 | 0.12 | 0.14 | 0.16 | 0.16 | 0.17 |
| chr18 | 64648473 | 64648976 | Fech          | ENSMUSG00000024588 | -6   | 0.12 | 0.11 | 0.07 | 0.15 | 0.16 | 0.14 |
| chr18 | 4352892  | 4353502  | Map3k8        | ENSMUSG00000024235 | -246 | 0.16 | 0.22 | 0.09 | 0.13 | 0.12 | 0.13 |
| chr18 | 53623374 | 53624963 | Prdm6         | ENSMUSG00000069378 | -32  | 0.15 | 0.26 | 0.12 | 0.11 | 0.14 | 0.15 |
| chr18 | 67404828 | 67405379 | Mppe1         | ENSMUSG00000062526 | 381  | 0.37 | 0.3  | 0.2  | 0.22 | 0.33 | 0.25 |
| chr18 | 23197677 | 23198675 | Nol4          | ENSMUSG00000041923 | 403  | 0.21 | 0.18 | 0.16 | 0.26 | 0.17 | 0.21 |
| chr18 | 25911621 | 25912109 | Cellf4        | ENSMUSG00000024268 | 619  | 0.13 | 0.17 | 0.13 | 0.16 | 0.11 | 0.16 |
| chr18 | 46357799 | 46358888 | Trim36        | ENSMUSG00000033949 | 129  | 0.18 | 0.29 | 0.09 | 0.21 | 0.17 | 0.13 |
| chr18 | 59334662 | 59336123 | Chsy3         | ENSMUSG00000058152 | 337  | 0.15 | 0.15 | 0.1  | 0.12 | 0.14 | 0.12 |
| chr18 | 3383026  | 3383495  | Cul2          | ENSMUSG00000024231 | 37   | 0.18 | 0.15 | 0.06 | 0.11 | 0.14 | 0.13 |
| chr18 | 11997672 | 11999397 | Cables1       | ENSMUSG00000040957 | 805  | 0.1  | 0.2  | 0.09 | 0.18 | 0.1  | 0.13 |
| chr18 | 83078925 | 83080942 | Zfp516        | ENSMUSG00000058881 | -338 | 0.13 | 0.42 | 0.13 | 0.15 | 0.1  | 0.22 |
| chr18 | 10325109 | 10325815 | Greb1l        | ENSMUSG00000042942 | 287  | 0.12 | 0.12 | 0.09 | 0.12 | 0.12 | 0.14 |
| chr18 | 24178736 | 24179640 | Zfp191        | ENSMUSG00000051469 | -367 | 0.08 | 0.09 | 0.09 | 0.13 | 0.08 | 0.13 |
| chr18 | 25327035 | 25327804 | 5730494M16Rik | ENSMUSG00000024269 | -224 | 0.12 | 0.26 | 0.11 | 0.12 | 0.12 | 0.12 |
| chr18 | 61195329 | 61196133 | Cdx1          | ENSMUSG00000024619 | 122  | 0.19 | 0.27 | 0.14 | 0.19 | 0.19 | 0.23 |
| chr18 | 44987867 | 44988675 | Ythdc2        | ENSMUSG00000034653 | -48  | 0.09 | 0.06 | 0.09 | 0.14 | 0.08 | 0.15 |
| chr18 | 82861482 | 82861815 | Zfp236        | ENSMUSG00000041258 | 478  | 0.33 | 0.78 | 0.09 | 0.37 | 0.39 | 0.18 |
| chr18 | 7002294  | 7002657  | Mkx           | ENSMUSG00000061013 | 1305 | 0.15 | 0.22 | 0.17 | 0.27 | 0.18 | 0.42 |
| chr18 | 9212145  | 9214927  | Fzd8          | ENSMUSG00000036904 | 682  | 0.14 | 0.13 | 0.13 | 0.24 | 0.14 | 0.16 |
| chr18 | 10725517 | 10726634 | Mib1          | ENSMUSG00000024294 | 529  | 0.11 | 0.19 | 0.12 | 0.12 | 0.11 | 0.14 |
| chr18 | 12802076 | 12802912 | Ttc39c        | ENSMUSG00000024424 | 641  | 0.12 | 0.14 | 0.11 | 0.22 | 0.12 | 0.15 |

|       |          |          |               |                    |      |      |      |      |      |      |      |
|-------|----------|----------|---------------|--------------------|------|------|------|------|------|------|------|
| chr18 | 20217458 | 20217847 | Dsc2          | ENSMUSG00000024331 | 327  | 0.14 | 0.11 | 0.1  | 0.3  | 0.11 | 0.17 |
| chr18 | 21119852 | 21120331 | Rnf125        | ENSMUSG00000033107 | -47  | 0.33 | 0.44 | 0.22 | 0.26 | 0.31 | 0.25 |
| chr18 | 23199764 | 23200138 | Nol4          | ENSMUSG00000041923 | 203  | 0.15 | 0.15 | 0.08 | 0.14 | 0.16 | 0.13 |
| chr18 | 25912793 | 25914041 | Celf4         | ENSMUSG00000024268 | -933 | 0.13 | 0.16 | 0.12 | 0.16 | 0.14 | 0.18 |
| chr18 | 31793636 | 31795102 | Sap130        | ENSMUSG00000024260 | 344  | 0.09 | 0.12 | 0.1  | 0.19 | 0.09 | 0.12 |
| chr18 | 31963634 | 31964166 | Wdr33         | ENSMUSG00000024400 | 189  | 0.15 | 0.06 | 0.09 | 0.17 | 0.17 | 0.19 |
| chr18 | 32399774 | 32400191 | Erc3          | ENSMUSG00000024382 | 28   | 0.15 | 0.11 | 0.09 | 0.17 | 0.14 | 0.18 |
| chr18 | 32536900 | 32537421 | Bin1          | ENSMUSG00000024381 | 289  | 0.64 | 0.22 | 0.1  | 0.17 | 0.67 | 0.14 |
| chr18 | 34919040 | 34919460 | Fam53c        | ENSMUSG00000034300 | 40   | 0.25 | 0.09 | 0.14 | 0.22 | 0.13 | 0.17 |
| chr18 | 36440298 | 36441217 | Pura          | ENSMUSG00000043991 | 6    | 0.12 | 0.75 | 0.09 | 0.16 | 0.12 | 0.15 |
| chr18 | 36961276 | 36961679 | Vault         | ENSMUSG00000065145 | -43  | 0.1  | 0.1  | 0.19 | 0.26 | 0.12 | 0.28 |
| chr18 | 37303102 | 37304151 | Pcdha4        | ENSMUSG0000007440  | 3    | 0.17 | 0.09 | 0.12 | 0.14 | 0.17 | 0.12 |
| chr18 | 37634746 | 37635072 | Pcdhb15       | ENSMUSG00000047033 | 1709 | 1    | 1    | 0.63 | NA   | 0.83 | 0.33 |
| chr18 | 38371003 | 38371615 | Pcdh1         | ENSMUSG00000051375 | 315  | 0.08 | 0.18 | 0.08 | 0.14 | 0.08 | 0.11 |
| chr18 | 38498417 | 38498705 | Gnpda1        | ENSMUSG00000052102 | 2    | 0.14 | 0.15 | 0.18 | 0.11 | 0.14 | 0.23 |
| chr18 | 40378595 | 40379225 | Yipf5         | ENSMUSG00000024487 | 143  | 0.12 | 0.28 | 0.11 | 0.19 | 0.15 | 0.15 |
| chr18 | 46471275 | 46471799 | Ccdc112       | ENSMUSG00000071855 | 45   | 0.07 | 0.06 | 0.1  | 0.1  | 0.07 | 0.12 |
| chr18 | 47009782 | 47010243 | 4833403115Rik | ENSMUSG00000024481 | 319  | 0.28 | 0.26 | 0.29 | 0.38 | 0.3  | 0.25 |
| chr18 | 47118383 | 47118784 | Comm10        | ENSMUSG00000042705 | 68   | 0.09 | 0.08 | 0.16 | 0.09 | 0.09 | 0.18 |
| chr18 | 49914980 | 49915543 | Dtwd2         | ENSMUSG00000024505 | -6   | 0.06 | 0.08 | 0.07 | 0.08 | 0.06 | 0.11 |
| chr18 | 58369026 | 58370139 | Fbn2          | ENSMUSG00000024598 | -2   | 0.13 | 0.13 | 0.1  | 0.17 | 0.13 | 0.15 |
| chr18 | 60783754 | 60784103 | Synpo         | ENSMUSG00000043079 | -38  | 0.07 | 0.25 | 0.16 | 0.11 | 0.11 | 0.11 |
| chr18 | 61173581 | 61174000 | Slc6a7        | ENSMUSG00000052026 | 63   | 0.29 | 0.57 | 0.16 | 0.25 | 0.38 | 0.2  |
| chr18 | 64424747 | 64424972 | St8sia3       | ENSMUSG00000056812 | -791 | 0.06 | 0.2  | 0.08 | 0.09 | 0.08 | 0.16 |
| chr18 | 64499624 | 64501154 | Onecut2       | ENSMUSG00000045991 | 371  | 0.19 | 0.19 | 0.12 | 0.18 | 0.19 | 0.16 |
| chr18 | 65047495 | 65048215 | Nedd4l        | ENSMUSG00000024589 | 445  | 0.09 | 0.15 | 0.11 | 0.17 | 0.09 | 0.14 |
| chr18 | 67608313 | 67609229 | Afg3l2        | ENSMUSG00000024527 | -10  | 0.13 | 0.13 | 0.09 | 0.15 | 0.13 | 0.15 |
| chr18 | 67624380 | 67625125 | Slmo1         | ENSMUSG00000024530 | 249  | 0.14 | 0.13 | 0.14 | 0.11 | 0.17 | 0.31 |
| chr18 | 67934250 | 67935050 | Gm17238       | ENSMUSG00000091127 | -139 | 0.07 | 0.07 | 0.12 | 0.14 | 0.07 | 0.1  |
| chr18 | 70631341 | 70631782 | Stard6        | ENSMUSG00000079608 | -547 | 0.33 | 0.46 | 0.14 | 0.26 | 0.32 | 0.22 |

|       |          |          |               |                    |      |      |      |      |      |      |      |
|-------|----------|----------|---------------|--------------------|------|------|------|------|------|------|------|
| chr18 | 74367182 | 74367463 | Ska1          | ENSMUSG00000036223 | 150  | 0.17 | 0.17 | 0.13 | 0.24 | 0.11 | 0.11 |
| chr18 | 74938279 | 74939080 | SCARNA17      | ENSMUSG00000089235 | -325 | 0.25 | 1    | 0.1  | 0.12 | 0.12 | 0.24 |
| chr18 | 77182816 | 77183185 | Hdhd2         | ENSMUSG00000025421 | 146  | 0.39 | 0.17 | 0.09 | 0.21 | 0.41 | 0.14 |
| chr18 | 77303679 | 77304613 | Pias2         | ENSMUSG00000025423 | 199  | 0.2  | 0.09 | 0.08 | 0.18 | 0.2  | 0.11 |
| chr18 | 79305673 | 79307162 | Setbp1        | ENSMUSG00000024548 | -287 | 0.16 | 0.2  | 0.11 | 0.18 | 0.16 | 0.15 |
| chr18 | 83083513 | 83084124 | Zfp516        | ENSMUSG00000058881 | -206 | 1    | 0.3  | 0.22 | 0.17 | 0.5  | 0.19 |
| chr18 | 84758216 | 84758526 | Zfp407        | ENSMUSG00000048410 | 525  | 0.12 | NA   | 0.21 | 0.06 | 0.15 | 0.42 |
| chr18 | 85121318 | 85121669 | 1700034H14Rik | ENSMUSG00000024645 | -577 | 0.12 | 0.15 | 0.13 | 0.12 | 0.14 | 0.09 |
| chr18 | 82575006 | 82575944 | Galr1         | ENSMUSG00000024553 | 694  | NA   | 0.5  | 0.07 | 0.22 | NA   | 0.25 |
| chr18 | 4375545  | 4375929  | Mtpap         | ENSMUSG00000024234 | 147  | NA   | NA   | 0.18 | NA   | NA   | 0.23 |
| chr18 | 8693872  | 8694079  | Gm5819        | ENSMUSG00000092097 | -100 | NA   | NA   | 1    | NA   | NA   | 0.25 |
| chr18 | 12279783 | 12280136 | 6030446N20Rik | ENSMUSG00000049411 | 30   | NA   | 0.17 | 0.09 | 0.18 | 0.13 | 0.12 |
| chr18 | 15918399 | 15918747 | Chst9         | ENSMUSG00000047161 | 93   | NA   | 0.13 | 0.12 | 0.19 | 0.12 | 0.15 |
| chr18 | 16965418 | 16965642 | Cdh2          | ENSMUSG00000024304 | 1441 | NA   | NA   | 0.08 | 0.17 | NA   | 0.31 |
| chr18 | 21811213 | 21811706 | 4930426D05Rik | ENSMUSG00000043168 | 395  | 1    | NA   | 0.33 | 0.23 | NA   | 0.16 |
| chr18 | 31948596 | 31948874 | Gm16827       | ENSMUSG00000086768 | -36  | NA   | NA   | 0.13 | 0.55 | NA   | 0.11 |
| chr18 | 34811007 | 34811498 | Cdc23         | ENSMUSG00000024370 | 120  | NA   | NA   | NA   | 0.71 | NA   | NA   |
| chr18 | 35019480 | 35019707 | Egr1          | ENSMUSG00000038418 | 116  | NA   | NA   | NA   | 1    | NA   | NA   |
| chr18 | 36124497 | 36124889 | Psd2          | ENSMUSG00000024347 | -26  | NA   | NA   | 0.19 | 0.13 | NA   | 0.13 |
| chr18 | 36838729 | 36839310 | Apbb3         | ENSMUSG0000001379  | 1    | NA   | 0.5  | 0.17 | 0.13 | 0.08 | 0.15 |
| chr18 | 36894615 | 36895057 | Tmco6         | ENSMUSG00000006850 | 114  | 0.17 | 0.67 | 0.23 | 0.38 | NA   | 0.2  |
| chr18 | 36919792 | 36920146 | Wdr55         | ENSMUSG00000042660 | 76   | NA   | 0.08 | 0.11 | 0.16 | 0.09 | 0.14 |
| chr18 | 37113635 | 37114356 | Pcdha4        | ENSMUSG0000007440  | 1575 | NA   | NA   | 0.83 | NA   | NA   | 0.53 |
| chr18 | 37158904 | 37159613 | Pcdha4        | ENSMUSG0000007440  | 1724 | NA   | NA   | 0.85 | NA   | 1    | 1    |
| chr18 | 37165069 | 37165276 | Pcdha4        | ENSMUSG0000007440  | 198  | 1    | NA   | 0.8  | NA   | NA   | 1    |
| chr18 | 37180005 | 37180456 | Gm10545       | ENSMUSG00000073594 | 103  | NA   | 0.75 | 1    | NA   | 1    | 0.63 |
| chr18 | 37468754 | 37469187 | Pcdhb4        | ENSMUSG00000045689 | 1861 | NA   | NA   | 0.73 | NA   | NA   | 1    |
| chr18 | 37582849 | 37583169 | Pcdhb11       | ENSMUSG00000051486 | 1937 | 1    | NA   | 0.71 | 1    | NA   | 1    |
| chr18 | 37609112 | 37609396 | Pcdhb14       | ENSMUSG00000044043 | 1943 | 1    | NA   | 0.5  | NA   | NA   | NA   |
| chr18 | 37901908 | 37902171 | Pcdhga9       | ENSMUSG00000023036 | 291  | 0.61 | NA   | 1    | NA   | NA   | NA   |

|       |          |          |               |                    |       |      |      |      |      |      |      |
|-------|----------|----------|---------------|--------------------|-------|------|------|------|------|------|------|
| chr18 | 38409748 | 38410225 | 1700086O06Rik | ENSMUSG00000086988 | -134  | NA   | 1    | 0.33 | 0.14 | NA   | 0.25 |
| chr18 | 39650891 | 39651506 | Nr3c1         | ENSMUSG00000024431 | -245  | NA   | 1    | 0.48 | 0.83 | NA   | 0.52 |
| chr18 | 42110521 | 42110891 | Preli2        | ENSMUSG00000056671 | 142   | NA   | 0.07 | 0.16 | 0.15 | 0.2  | 0.25 |
| chr18 | 43637243 | 43637492 | Gm9781        | ENSMUSG00000043424 | 83    | NA   | 0.12 | 0.09 | 0.12 | 1    | 0.17 |
| chr18 | 47525997 | 47526752 | Sema6a        | ENSMUSG00000019647 | 1548  | NA   | 1    | 0.09 | 0.36 | 0.21 | 0.16 |
| chr18 | 53622496 | 53622745 | Prdm6         | ENSMUSG00000069378 | -1580 | NA   | 1    | 0.4  | 1    | 1    | 0.36 |
| chr18 | 53711994 | 53712223 | Prdm6         | ENSMUSG00000069378 | 860   | NA   | 1    | NA   | NA   | NA   | NA   |
| chr18 | 60685738 | 60686120 | Dctn4         | ENSMUSG00000024603 | 61    | NA   | 0.16 | 0.07 | 0.13 | 0.1  | 0.11 |
| chr18 | 61008397 | 61008633 | Tcof1         | ENSMUSG00000024613 | 47    | NA   | NA   | 0.17 | 0.34 | NA   | 0.07 |
| chr18 | 63868186 | 63868521 | Wdr7          | ENSMUSG00000040560 | 4     | NA   | 0.47 | 0.17 | 0.13 | NA   | 0.14 |
| chr18 | 64425566 | 64425931 | St8sia3       | ENSMUSG00000056812 | 98    | NA   | NA   | 0.21 | 1    | NA   | 0.5  |
| chr18 | 64499023 | 64499248 | Onecut2       | ENSMUSG00000045991 | -883  | 0.25 | NA   | 0.35 | NA   | NA   | 0.29 |
| chr18 | 64675819 | 64676375 | Nars          | ENSMUSG00000024587 | 114   | NA   | 0.06 | 0.11 | 0.15 | 0.17 | 0.13 |
| chr18 | 67503281 | 67503524 | B430212C06Rik | ENSMUSG00000046415 | -165  | NA   | NA   | 0.4  | 1    | NA   | NA   |
| chr18 | 70689676 | 70690057 | Poli          | ENSMUSG00000038425 | -74   | 0.46 | 0.08 | 0.08 | 0.5  | NA   | 0.36 |
| chr18 | 75120809 | 75121273 | Lipg          | ENSMUSG00000053846 | -124  | NA   | 0.5  | 0.03 | 0.17 | NA   | 0.12 |
| chr18 | 75165373 | 75165768 | BC031181      | ENSMUSG00000036299 | 16    | NA   | 0.22 | 0.17 | 0.24 | 0.35 | 0.24 |
| chr18 | 75857329 | 75857542 | Ctif          | ENSMUSG00000052928 | -85   | NA   | NA   | 0.08 | 0.19 | NA   | 0.1  |
| chr18 | 78135097 | 78135411 | 5430411K18Rik | ENSMUSG00000039840 | 15    | NA   | 0.3  | 0.15 | 0.27 | 0.14 | 0.12 |
| chr18 | 80347432 | 80347681 | Adnp2         | ENSMUSG00000053950 | 665   | NA   | 0.06 | 0.14 | 0.08 | 0.04 | 0.1  |
| chr18 | 80347880 | 80348272 | Adnp2         | ENSMUSG00000053950 | 145   | NA   | 1    | 0.17 | NA   | NA   | 0.25 |
| chr18 | 82644433 | 82644868 | Mbp           | ENSMUSG00000041607 | 112   | NA   | 0.25 | 0.08 | 0.16 | 0.08 | 0.16 |
| chr18 | 82645455 | 82645667 | Mbp           | ENSMUSG00000041607 | 799   | NA   | NA   | 0.13 | 0.17 | NA   | 0.18 |
| chr18 | 82862242 | 82862562 | Gm10524       | ENSMUSG00000073519 | 61    | NA   | 0.11 | 0.12 | 0.24 | 0.06 | 0.18 |
| chr18 | 86880821 | 86881153 | Cbln2         | ENSMUSG00000024647 | 75    | NA   | NA   | 0.2  | 1    | 0.17 | 0.11 |
| chr19 | 53674496 | 53675541 | Smc3          | ENSMUSG00000024974 | 132   | 0.06 | 0.33 | 0.08 | 0.14 | 0.25 | 0.15 |
| chr19 | 44181579 | 44182113 | Chuk          | ENSMUSG00000025199 | -74   | 0.21 | 0.11 | 0.09 | 0.18 | 0.05 | 0.11 |
| chr19 | 42244961 | 42245402 | Zfyve27       | ENSMUSG00000018820 | 124   | 0.38 | 0.13 | 0.08 | 0.16 | 0.07 | 0.18 |
| chr19 | 37771689 | 37773745 | Cyp26a1       | ENSMUSG00000024987 | 419   | 0.5  | 0.21 | 0.1  | 0.17 | 0.13 | 0.17 |
| chr19 | 11952827 | 11953139 | Gm6365        | ENSMUSG00000051548 | -135  | 0.35 | 0.62 | 0.57 | 0.9  | 0.67 | 0.64 |



|       |          |          |               |                    |      |      |      |      |      |      |      |
|-------|----------|----------|---------------|--------------------|------|------|------|------|------|------|------|
| chr19 | 3388813  | 3389374  | Mll5          | ENSMUSG00000024905 | 236  | 0.62 | 0.12 | 0.1  | 0.19 | 0.16 | 0.14 |
| chr19 | 3767370  | 3769102  | Suv420h1      | ENSMUSG00000045098 | 815  | 0.26 | 0.13 | 0.11 | 0.16 | 0.13 | 0.15 |
| chr19 | 54018376 | 54020122 | Bbip1         | ENSMUSG00000084957 | -588 | 0.26 | 0.16 | 0.15 | 0.19 | 0.1  | 0.14 |
| chr19 | 34952770 | 34953737 | Pank1         | ENSMUSG00000033610 | 692  | 0.18 | 0.16 | 0.09 | 0.11 | 0.06 | 0.16 |
| chr19 | 17911293 | 17912171 | Pcsk5         | ENSMUSG00000024713 | 390  | 0.25 | 0.12 | 0.11 | 0.13 | 0.1  | 0.16 |
| chr19 | 42203290 | 42203884 | Avpi1         | ENSMUSG00000018821 | -108 | 0.47 | 0.1  | 0.11 | 0.18 | 0.07 | 0.33 |
| chr19 | 41986181 | 41987063 | Pgam1         | ENSMUSG00000011752 | 261  | 0.38 | 0.25 | 0.1  | 0.27 | 0.12 | 0.15 |
| chr19 | 59149632 | 59150439 | 4930506M07Rik | ENSMUSG00000041362 | 524  | 0.57 | 0.39 | 0.11 | 0.21 | 0.17 | 0.26 |
| chr19 | 7415663  | 7416542  | Mark2         | ENSMUSG00000024969 | -420 | 0.26 | 0.22 | 0.12 | 0.19 | 0.12 | 0.17 |
| chr19 | 29325602 | 29326669 | Jak2          | ENSMUSG00000024789 | -183 | 0.33 | 0.26 | 0.15 | 0.14 | 0.11 | 0.13 |
| chr19 | 55173535 | 55174059 | Gpam          | ENSMUSG00000024978 | 144  | 0.18 | 0.08 | 0.09 | 0.09 | 0.05 | 0.12 |
| chr19 | 6375517  | 6375855  | Sf1           | ENSMUSG00000024949 | 1557 | 0.29 | 0.31 | 0.26 | 0.54 | 0.55 | 0.65 |
| chr19 | 29596458 | 29597704 | A930007119Rik | ENSMUSG00000086309 | -602 | 0.14 | 0.1  | 0.09 | 0.12 | 0.07 | 0.11 |
| chr19 | 10599525 | 10600349 | Sdhaf2        | ENSMUSG00000024668 | -238 | 0.34 | 0.15 | 0.08 | 0.12 | 0.09 | 0.18 |
| chr19 | 29122010 | 29122537 | Ak3           | ENSMUSG00000024782 | 178  | 0.43 | 0.39 | 0.1  | 0.15 | 0.11 | 0.13 |
| chr19 | 47124795 | 47125538 | Pcgf6         | ENSMUSG00000025050 | 169  | 0.23 | 0.27 | 0.14 | 0.19 | 0.1  | 0.15 |
| chr19 | 44143953 | 44144364 | Erlin1        | ENSMUSG00000025198 | -142 | 0.24 | 0.17 | 0.1  | 0.1  | 0.08 | 0.16 |
| chr19 | 25311028 | 25312265 | Kank1         | ENSMUSG00000032702 | 181  | 0.32 | 0.23 | 0.09 | 0.18 | 0.07 | 0.17 |
| chr19 | 5038536  | 5039488  | B3gnt1        | ENSMUSG00000047379 | 186  | 0.09 | 0.15 | 0.16 | 0.28 | 0.3  | 0.16 |
| chr19 | 5912253  | 5912967  | Dpf2          | ENSMUSG00000024826 | 159  | 0.5  | 0.09 | 0.1  | 0.16 | 0.07 | 0.14 |
| chr19 | 30249364 | 30249962 | Gldc          | ENSMUSG00000024827 | 67   | 0.61 | 0.26 | 0.13 | 0.22 | 0.25 | 0.18 |
| chr19 | 5609691  | 5610302  | Kat5          | ENSMUSG00000024926 | 33   | 0.29 | 0.36 | 0.13 | 0.21 | 0.09 | 0.18 |
| chr19 | 6241416  | 6241848  | Atg2a         | ENSMUSG00000024773 | -36  | 0.39 | 0.22 | 0.12 | 0.16 | 0.16 | 0.14 |
| chr19 | 12869237 | 12870844 | Zfp91         | ENSMUSG00000024695 | 576  | 0.18 | 0.14 | 0.09 | 0.1  | 0.07 | 0.15 |
| chr19 | 6046736  | 6047482  | Syvn1         | ENSMUSG00000024807 | 44   | 0.19 | 0.25 | 0.12 | 0.22 | 0.5  | 0.15 |
| chr19 | 5041272  | 5041632  | Brms1         | ENSMUSG00000080268 | 59   | 0.1  | 0.12 | 0.09 | 0.13 | 0.24 | 0.15 |
| chr19 | 46402685 | 46404076 | Fbxl15        | ENSMUSG00000025226 | 706  | 0.28 | 0.14 | 0.12 | 0.13 | 0.14 | 0.14 |
| chr19 | 31157128 | 31157639 | Cstf2t        | ENSMUSG00000053536 | 52   | 0.41 | 0.21 | 0.13 | 0.2  | 0.16 | 0.16 |
| chr19 | 24354714 | 24355182 | Fxn           | ENSMUSG00000059363 | 110  | 0.23 | 0.66 | 0.16 | 0.24 | 0.46 | 0.35 |
| chr19 | 12575497 | 12576290 | Dtx4          | ENSMUSG00000039982 | 593  | 0.2  | 0.19 | 0.11 | 0.16 | 0.07 | 0.17 |

|       |          |          |               |                    |      |      |      |      |      |      |      |
|-------|----------|----------|---------------|--------------------|------|------|------|------|------|------|------|
| chr19 | 14671403 | 14673596 | Tle4          | ENSMUSG00000024642 | -26  | 0.16 | 0.14 | 0.11 | 0.12 | 0.1  | 0.14 |
| chr19 | 60302179 | 60302658 | 4933412A08Rik | ENSMUSG00000043623 | 181  | 0.17 | 0.15 | 0.12 | 0.16 | 0.63 | 0.14 |
| chr19 | 60887497 | 60887828 | Fam45a        | ENSMUSG00000024993 | 163  | 0.63 | 0.19 | 0.14 | 0.2  | 0.11 | 0.16 |
| chr19 | 32560141 | 32561146 | Minpp1        | ENSMUSG00000024896 | 384  | 0.08 | 0.18 | 0.09 | 0.19 | 0.18 | 0.13 |
| chr19 | 46469592 | 46470359 | Actr1a        | ENSMUSG00000025228 | 250  | 0.17 | 0.16 | 0.09 | 0.1  | 0.53 | 0.1  |
| chr19 | 41337679 | 41338794 | Tm9sf3        | ENSMUSG00000025016 | 225  | 0.19 | 0.13 | 0.12 | 0.13 | 0.11 | 0.14 |
| chr19 | 24935990 | 24936434 | Pgm5          | ENSMUSG00000041731 | -70  | 0.31 | 0.17 | 0.09 | 0.13 | 0.1  | 0.13 |
| chr19 | 41921581 | 41922982 | Frat2         | ENSMUSG00000047604 | 341  | 0.2  | 0.12 | 0.08 | 0.14 | 0.1  | 0.12 |
| chr19 | 7008210  | 7008818  | Kcnk4         | ENSMUSG00000024957 | 491  | 0.43 | 0.44 | 0.14 | 0.23 | 0.17 | 0.22 |
| chr19 | 45734162 | 45735079 | Fbxw4         | ENSMUSG00000040913 | 182  | 0.12 | 0.17 | 0.11 | 0.14 | 0.22 | 0.18 |
| chr19 | 37000453 | 37001117 | Btaf1         | ENSMUSG00000040565 | 216  | 0.13 | 0.09 | 0.12 | 0.13 | 0.07 | 0.1  |
| chr19 | 42007368 | 42008022 | Exosc1        | ENSMUSG00000034321 | 109  | 0.24 | 0.14 | 0.08 | 0.21 | 0.1  | 0.16 |
| chr19 | 43827219 | 43827887 | Cutc          | ENSMUSG00000025193 | 67   | 0.45 | 0.17 | 0.1  | 0.11 | 0.11 | 0.21 |
| chr19 | 44910462 | 44911505 | 1700039E22Rik | ENSMUSG00000092369 | -555 | 0.28 | 0.28 | 0.09 | 0.19 | 0.07 | 0.18 |
| chr19 | 16946810 | 16949143 | Foxb2         | ENSMUSG00000056829 | 154  | 0.17 | 0.16 | 0.11 | 0.14 | 0.08 | 0.16 |
| chr19 | 43514796 | 43516159 | Cnnm1         | ENSMUSG00000025189 | 551  | 0.14 | 0.09 | 0.1  | 0.12 | 0.09 | 0.12 |
| chr19 | 47089000 | 47090235 | Ina           | ENSMUSG00000034336 | 429  | 0.5  | 0.42 | 0.1  | 0.15 | 0.11 | 0.14 |
| chr19 | 56896266 | 56896840 | A630007B06Rik | ENSMUSG00000035173 | 127  | 0.11 | 0.08 | 0.08 | 0.15 | 0.06 | 0.13 |
| chr19 | 25747871 | 25748447 | Dmrt2         | ENSMUSG00000048138 | 1249 | 0.34 | 0.09 | 0.12 | 0.14 | 0.12 | 0.13 |
| chr19 | 7456713  | 7457712  | Al846148      | ENSMUSG00000024970 | 304  | 0.33 | 0.16 | 0.1  | 0.18 | 0.18 | 0.13 |
| chr19 | 29887398 | 29887647 | Ranbp6        | ENSMUSG00000074909 | -58  | 0.17 | 0.07 | 0.08 | 0.17 | 0.06 | 0.21 |
| chr19 | 5490325  | 5491415  | Cfl1          | ENSMUSG00000056201 | 385  | 0.13 | 0.21 | 0.1  | 0.13 | 0.19 | 0.15 |
| chr19 | 38910988 | 38912013 | Tbc1d12       | ENSMUSG00000048720 | 431  | 0.22 | 0.2  | 0.1  | 0.13 | 0.14 | 0.12 |
| chr19 | 53216625 | 53218067 | Add3          | ENSMUSG00000025026 | 100  | 0.27 | 0.22 | 0.09 | 0.11 | 0.12 | 0.14 |
| chr19 | 8831195  | 8831864  | Nxf1          | ENSMUSG00000010097 | -64  | 0.28 | 0.14 | 0.13 | 0.19 | 0.11 | 0.13 |
| chr19 | 6418583  | 6418934  | Gm14965       | ENSMUSG00000084876 | -152 | 1    | 1    | 0.06 | 0.1  | 0.12 | 0.16 |
| chr19 | 33466265 | 33466720 | Rnls          | ENSMUSG00000071573 | 263  | 0.86 | 0.33 | 0.17 | 0.29 | 0.17 | 0.26 |
| chr19 | 7000431  | 7000830  | 1700019N12Rik | ENSMUSG00000050623 | -760 | 0.38 | 0.37 | 0.3  | 0.39 | 0.22 | 0.39 |
| chr19 | 21852623 | 21853490 | Tmem2         | ENSMUSG00000024754 | 224  | 0.17 | 0.2  | 0.1  | 0.12 | 0.06 | 0.17 |
| chr19 | 46077857 | 46078553 | Hps6          | ENSMUSG00000074811 | 237  | 0.26 | 0.17 | 0.13 | 0.14 | 0.12 | 0.17 |

|       |          |          |               |                     |       |      |      |      |      |      |      |
|-------|----------|----------|---------------|---------------------|-------|------|------|------|------|------|------|
| chr19 | 7114005  | 7114441  | Stip1         | ENSMUSG00000024966  | 293   | 0.19 | 0.1  | 0.08 | 0.16 | 0.07 | 0.09 |
| chr19 | 46378944 | 46380310 | Nfkb2         | ENSMUSG00000025225  | 400   | 0.23 | 0.1  | 0.13 | 0.19 | 0.13 | 0.21 |
| chr19 | 59246087 | 59246331 | Vax1          | ENSMUSG00000006270  | -583  | 0.63 | 0.13 | 0.28 | 0.32 | 0.3  | 0.13 |
| chr19 | 4396497  | 4398547  | Kdm2a         | ENSMUSG000000054611 | -454  | 0.19 | 0.25 | 0.1  | 0.14 | 0.13 | 0.15 |
| chr19 | 45225065 | 45226104 | Tlx1          | ENSMUSG000000025215 | -1639 | 0.15 | 0.16 | 0.11 | 0.17 | 0.09 | 0.16 |
| chr19 | 53750823 | 53752044 | Rbm20         | ENSMUSG000000043639 | -363  | 0.14 | 0.2  | 0.1  | 0.12 | 0.07 | 0.13 |
| chr19 | 11166727 | 11166992 | Gm336         | ENSMUSG000000079226 | -292  | 0.12 | 0.4  | 0.08 | NA   | 0.54 | NA   |
| chr19 | 40662690 | 40663068 | Aldh18a1      | ENSMUSG000000025007 | -20   | 0.27 | 0.14 | 0.11 | 0.26 | 0.11 | 0.1  |
| chr19 | 60019074 | 60019800 | Rab11fip2     | ENSMUSG000000040022 | -170  | 0.19 | 0.17 | 0.09 | 0.11 | 0.11 | 0.14 |
| chr19 | 40345576 | 40346223 | Pdlim1        | ENSMUSG000000055044 | 207   | 0.23 | 0.24 | 0.12 | 0.22 | 0.13 | 0.15 |
| chr19 | 4096842  | 4097602  | Cdk2ap2       | ENSMUSG000000024856 | 40    | 0.2  | 0.11 | 0.1  | 0.17 | 0.08 | 0.13 |
| chr19 | 4163126  | 4163430  | Rps6kb2       | ENSMUSG000000024830 | -4    | 0.44 | 0.33 | 0.13 | 0.19 | 0.1  | 0.09 |
| chr19 | 12040632 | 12040897 | Osbp          | ENSMUSG000000024687 | 333   | 0.15 | 0.06 | 0.08 | 0.07 | 0.06 | 0.09 |
| chr19 | 29879576 | 29881188 | 9930021J03Rik | ENSMUSG000000046138 | -563  | 0.15 | 0.14 | 0.12 | 0.16 | 0.24 | 0.16 |
| chr19 | 5731400  | 5731816  | Sssca1        | ENSMUSG000000079478 | -133  | 0.08 | 0.09 | 0.13 | 0.24 | 0.3  | 0.22 |
| chr19 | 7054246  | 7055085  | Fkbp2         | ENSMUSG000000056629 | 265   | 0.35 | 0.13 | 0.13 | 0.12 | 0.1  | 0.19 |
| chr19 | 27291445 | 27292817 | Vldlr         | ENSMUSG000000024924 | 621   | 0.22 | 0.07 | 0.08 | 0.11 | 0.1  | 0.13 |
| chr19 | 37281536 | 37282513 | Cpeb3         | ENSMUSG000000039652 | -261  | 0.17 | 0.12 | 0.11 | 0.12 | 0.11 | 0.1  |
| chr19 | 46072504 | 46073156 | 4930505N22Rik | ENSMUSG000000090325 | 203   | 0.1  | 0.14 | 0.14 | 0.12 | 0.21 | 0.26 |
| chr19 | 47805729 | 47806406 | Sfr1          | ENSMUSG000000025066 | -179  | 0.56 | 0.19 | 0.11 | 0.49 | 0.17 | 0.18 |
| chr19 | 55389852 | 55391162 | Zdhhc6        | ENSMUSG000000024982 | -16   | 0.18 | 0.09 | 0.09 | 0.15 | 0.12 | 0.13 |
| chr19 | 4269014  | 4269348  | Ssh3          | ENSMUSG000000034616 | -9    | 0.24 | 0.31 | 0.2  | 0.28 | 0.12 | 0.23 |
| chr19 | 28752593 | 28753004 | D930032P07Rik | ENSMUSG000000086457 | 84    | 0.12 | 0.23 | 0.14 | 0.22 | 0.31 | 0.15 |
| chr19 | 36484022 | 36484850 | Pcgf5         | ENSMUSG000000024805 | 198   | 0.13 | 0.15 | 0.08 | 0.19 | 0.07 | 0.17 |
| chr19 | 46471365 | 46471834 | Sufu          | ENSMUSG000000025231 | 213   | 0.33 | 0.25 | 0.09 | 0.26 | 0.14 | 0.11 |
| chr19 | 5726129  | 5726453  | Ehbp111       | ENSMUSG000000024937 | 26    | 0.19 | 0.17 | 0.13 | 0.22 | 0.09 | 0.2  |
| chr19 | 4476634  | 4477151  | Syt12         | ENSMUSG000000049303 | 234   | 0.13 | 0.33 | 0.06 | 0.16 | 0.07 | 0.11 |
| chr19 | 29064719 | 29065308 | Cdc3711       | ENSMUSG000000024780 | 156   | 0.26 | 0.7  | 0.15 | 0.17 | 0.46 | 0.22 |
| chr19 | 40587915 | 40588525 | Sorbs1        | ENSMUSG000000025006 | 49    | 0.31 | 0.16 | 0.08 | 0.15 | 0.15 | 0.14 |
| chr19 | 47538497 | 47539215 | Sh3pxd2a      | ENSMUSG000000053617 | 45    | 0.07 | 0.17 | 0.09 | 0.12 | 0.14 | 0.17 |

|       |          |          |          |                    |       |      |      |      |      |      |      |
|-------|----------|----------|----------|--------------------|-------|------|------|------|------|------|------|
| chr19 | 24298877 | 24299494 | Tjp2     | ENSMUSG00000024812 | 259   | 0.12 | 0.05 | 0.08 | 0.17 | 0.05 | 0.14 |
| chr19 | 44637218 | 44637536 | Hif1an   | ENSMUSG00000036450 | 37    | 0.44 | 0.25 | 0.11 | 0.18 | 0.17 | 0.17 |
| chr19 | 4201535  | 4201770  | Rad9     | ENSMUSG00000024824 | -49   | 0.09 | 0.36 | 0.14 | 0.22 | 0.67 | 0.14 |
| chr19 | 9973762  | 9974313  | Incenp   | ENSMUSG00000024660 | -58   | 0.15 | 0.2  | 0.09 | 0.18 | 0.06 | 0.16 |
| chr19 | 38893554 | 38893990 | Noc3l    | ENSMUSG00000024999 | -45   | 0.24 | 0.14 | 0.16 | 0.18 | 0.11 | 0.15 |
| chr19 | 4625268  | 4626124  | Rce1     | ENSMUSG00000024889 | -79   | 0.13 | 0.12 | 0.09 | 0.09 | 0.08 | 0.16 |
| chr19 | 8972426  | 8973001  | Ganab    | ENSMUSG00000071650 | 133   | 0.67 | 0.27 | 0.11 | 0.17 | 0.11 | 0.13 |
| chr19 | 24248366 | 24249008 | Tjp2     | ENSMUSG00000024812 | -149  | 0.09 | 0.08 | 0.09 | 0.11 | 0.19 | 0.13 |
| chr19 | 6914597  | 6915227  | Rps6ka4  | ENSMUSG00000024952 | 179   | 0.5  | 0.17 | 0.08 | 0.08 | 0.21 | 0.12 |
| chr19 | 45437938 | 45438462 | Btrc     | ENSMUSG00000025217 | -24   | 0.17 | 0.25 | 0.09 | 0.09 | 0.07 | 0.12 |
| chr19 | 46222694 | 46223359 | Pitx3    | ENSMUSG00000025229 | -161  | 0.5  | 0.16 | 0.11 | 0.09 | 0.12 | 0.14 |
| chr19 | 46574476 | 46577525 | Trim8    | ENSMUSG00000025034 | -138  | 0.14 | 0.17 | 0.1  | 0.14 | 0.1  | 0.12 |
| chr19 | 4000365  | 4000883  | Nudt8    | ENSMUSG00000024869 | 44    | 0.16 | 0.18 | 0.07 | 0.19 | 0.07 | 0.16 |
| chr19 | 43748921 | 43750454 | Slc25a28 | ENSMUSG00000040414 | -316  | 0.14 | 0.15 | 0.09 | 0.14 | 0.09 | 0.12 |
| chr19 | 37624958 | 37625546 | Exoc6    | ENSMUSG00000053799 | 344   | 0.23 | 0.14 | 0.09 | 0.2  | 0.13 | 0.16 |
| chr19 | 5803209  | 5804091  | Malat1   | ENSMUSG00000092341 | -979  | 0.27 | 0.57 | 0.09 | 0.27 | 0.11 | 0.11 |
| chr19 | 53464297 | 53465361 | Smndc1   | ENSMUSG00000025024 | 234   | 0.14 | 0.2  | 0.1  | 0.14 | 0.08 | 0.1  |
| chr19 | 26678968 | 26682373 | Smarca2  | ENSMUSG00000024921 | 1065  | 0.13 | 0.12 | 0.1  | 0.15 | 0.1  | 0.14 |
| chr19 | 4989709  | 4990055  | Npas4    | ENSMUSG00000045903 | 89    | 0.57 | 0.1  | 0.15 | 0.22 | 0.2  | 0.08 |
| chr19 | 6276509  | 6277525  | Gm14963  | ENSMUSG00000085196 | -412  | 0.16 | 0.16 | 0.09 | 0.14 | 0.08 | 0.13 |
| chr19 | 7061742  | 7062404  | Vegfb    | ENSMUSG00000024962 | 46    | 0.26 | 0.16 | 0.1  | 0.13 | 0.15 | 0.12 |
| chr19 | 4125745  | 4126310  | Aip      | ENSMUSG00000024847 | -237  | 0.15 | 0.4  | 0.22 | 0.14 | 0.26 | 0.16 |
| chr19 | 6363336  | 6364616  | Gm14966  | ENSMUSG00000079467 | -441  | 0.12 | 0.08 | 0.08 | 0.1  | 0.09 | 0.13 |
| chr19 | 43598833 | 43599473 | Got1     | ENSMUSG00000025190 | -178  | 0.11 | 0.1  | 0.1  | 0.24 | 0.2  | 0.14 |
| chr19 | 37508756 | 37510065 | Hhex     | ENSMUSG00000024986 | -1819 | 0.17 | 0.3  | 0.11 | 0.13 | 0.25 | 0.13 |
| chr19 | 8967393  | 8967774  | Ints5    | ENSMUSG00000071652 | 106   | 0.3  | 0.25 | 0.12 | 0.08 | 0.14 | 0.12 |
| chr19 | 10379023 | 10379728 | Dagla    | ENSMUSG00000035735 | -28   | 0.27 | 0.19 | 0.1  | 0.1  | 0.15 | 0.11 |
| chr19 | 44833318 | 44833810 | Pax2     | ENSMUSG00000004231 | -844  | 0.26 | 0.25 | 0.13 | 0.15 | 0.17 | 0.19 |
| chr19 | 10175712 | 10176710 | Fads2    | ENSMUSG00000024665 | -218  | 0.3  | 0.23 | 0.14 | 0.17 | 0.18 | 0.22 |
| chr19 | 56948556 | 56949143 | Vwa2     | ENSMUSG00000025082 | 110   | 0.06 | 0.09 | 0.08 | 0.11 | 0.17 | 0.11 |

|       |          |          |               |                    |      |      |      |      |      |      |      |
|-------|----------|----------|---------------|--------------------|------|------|------|------|------|------|------|
| chr19 | 45005343 | 45006091 | Fam178a       | ENSMUSG00000036097 | 108  | 0.14 | 0.11 | 0.1  | 0.16 | 0.08 | 0.15 |
| chr19 | 58528843 | 58530402 | Gfra1         | ENSMUSG00000025089 | -666 | 0.41 | 0.19 | 0.12 | 0.21 | 0.28 | 0.18 |
| chr19 | 4839196  | 4839726  | Ccs           | ENSMUSG00000034108 | -139 | 0.18 | 0.43 | 0.12 | 0.17 | 0.06 | 0.16 |
| chr19 | 7491295  | 7493014  | 2700081O15Rik | ENSMUSG00000053080 | 39   | 0.27 | 0.17 | 0.13 | 0.18 | 0.2  | 0.16 |
| chr19 | 4614859  | 4615687  | Lrfr4         | ENSMUSG00000045045 | 229  | 0.54 | 0.3  | 0.15 | 0.18 | 0.27 | 0.16 |
| chr19 | 5272605  | 5273458  | Pacs1         | ENSMUSG00000024855 | 88   | 0.19 | 0.1  | 0.13 | 0.14 | 0.08 | 0.13 |
| chr19 | 5771021  | 5771380  | Scyl1         | ENSMUSG00000024941 | 201  | 0.38 | 0.32 | 0.1  | 0.14 | 0.11 | 0.12 |
| chr19 | 3708133  | 3708709  | 1810055G02Rik | ENSMUSG00000035372 | 88   | 1    | 0.13 | 0.1  | 0.2  | 0.23 | 0.21 |
| chr19 | 4855087  | 4855512  | Ctsf          | ENSMUSG00000083282 | 170  | 0.05 | 0.34 | 0.1  | 0.19 | 0.18 | 0.13 |
| chr19 | 3907032  | 3907265  | Tcirg1        | ENSMUSG00000001750 | -108 | 1    | 0.71 | 0.33 | 0.57 | 0.58 | 0.5  |
| chr19 | 4191902  | 4192796  | Ppp1ca        | ENSMUSG00000040385 | 191  | 0.17 | 0.13 | 0.13 | 0.18 | 0.1  | 0.19 |
| chr19 | 24105593 | 24105882 | Fam189a2      | ENSMUSG00000071604 | -228 | 0.41 | 0.1  | 0.11 | 0.14 | 0.24 | 0.13 |
| chr19 | 28909490 | 28909918 | Slc1a1        | ENSMUSG00000024935 | 165  | 0.13 | 0.24 | 0.07 | 0.13 | 0.19 | 0.11 |
| chr19 | 45816913 | 45817412 | Fgf8          | ENSMUSG00000025219 | 12   | 0.14 | 0.07 | 0.2  | 0.31 | 0.5  | 0.22 |
| chr19 | 48279670 | 48281242 | Sorcs3        | ENSMUSG00000063434 | -59  | 0.17 | 0.14 | 0.11 | 0.13 | 0.12 | 0.17 |
| chr19 | 23348051 | 23348500 | Smc5          | ENSMUSG00000024943 | 92   | 0.22 | 0.44 | 0.11 | 0.18 | 0.12 | 0.19 |
| chr19 | 42593012 | 42593806 | D19Ertcd386e  | ENSMUSG00000025184 | 160  | 0.38 | 0.12 | 0.15 | 0.15 | 0.16 | 0.17 |
| chr19 | 57684695 | 57686335 | Atrnl1        | ENSMUSG00000054843 | -9   | 0.35 | 0.29 | 0.13 | 0.17 | 0.26 | 0.17 |
| chr19 | 3851599  | 3852560  | Chka          | ENSMUSG00000024843 | 306  | 0.26 | 0.26 | 0.11 | 0.13 | 0.16 | 0.19 |
| chr19 | 37308245 | 37308852 | U6            | ENSMUSG00000089143 | -576 | 0.31 | 0.27 | 0.16 | 0.14 | 0.12 | 0.17 |
| chr19 | 45823455 | 45824160 | Gm15491       | ENSMUSG00000087367 | -191 | 0.15 | 0.21 | 0.09 | 0.15 | 0.1  | 0.12 |
| chr19 | 18787344 | 18788221 | D030056L22Rik | ENSMUSG00000047044 | 99   | 0.17 | 0.09 | 0.08 | 0.18 | 0.09 | 0.1  |
| chr19 | 23209381 | 23210914 | 2410080I02Rik | ENSMUSG00000044387 | 757  | 0.13 | 0.1  | 0.12 | 0.18 | 0.26 | 0.2  |
| chr19 | 46835370 | 46837372 | Cnnm2         | ENSMUSG00000064105 | 285  | 0.18 | 0.13 | 0.1  | 0.12 | 0.11 | 0.12 |
| chr19 | 4509974  | 4511000  | Pcx           | ENSMUSG00000024892 | 15   | 0.08 | 0.2  | 0.08 | 0.14 | 0.13 | 0.12 |
| chr19 | 4711753  | 47112638 | Spnb3         | ENSMUSG00000067889 | 987  | 0.13 | 0.23 | 0.08 | 0.17 | 0.08 | 0.15 |
| chr19 | 32461963 | 32464322 | Sgms1         | ENSMUSG00000040451 | -198 | 0.14 | 0.19 | 0.1  | 0.16 | 0.18 | 0.14 |
| chr19 | 5729216  | 5729746  | Fam89b        | ENSMUSG00000024939 | 152  | 0.29 | 0.59 | 0.14 | 0.19 | 0.42 | 0.16 |
| chr19 | 41280535 | 41281640 | Tll2          | ENSMUSG00000025013 | 177  | 0.5  | 0.41 | 0.13 | 0.16 | 0.22 | 0.14 |
| chr19 | 45151272 | 45151708 | Kazald1       | ENSMUSG00000025213 | 861  | 0.17 | 0.31 | 0.14 | 0.16 | 0.1  | 0.15 |

|       |          |          |           |                     |      |      |      |      |      |      |      |
|-------|----------|----------|-----------|---------------------|------|------|------|------|------|------|------|
| chr19 | 4811135  | 4812016  | Rbm14     | ENSMUSG00000006456  | -67  | 0.36 | 0.22 | 0.2  | 0.21 | 0.16 | 0.17 |
| chr19 | 5388177  | 5388899  | Sart1     | ENSMUSG000000039148 | 165  | 0.11 | 0.13 | 0.08 | 0.11 | 0.07 | 0.13 |
| chr19 | 15999003 | 15999776 | Psat1     | ENSMUSG000000024640 | -277 | 0.08 | 0.4  | 0.1  | 0.12 | 0.18 | 0.16 |
| chr19 | 47142092 | 47142975 | Taf5      | ENSMUSG000000025049 | 295  | 0.17 | 0.14 | 0.12 | 0.12 | 0.12 | 0.15 |
| chr19 | 41556717 | 41557046 | Lcor      | ENSMUSG000000025019 | -246 | 0.08 | 0.06 | 0.13 | 0.09 | 0.04 | 0.13 |
| chr19 | 6398554  | 6398855  | Rasgrp2   | ENSMUSG000000032946 | -636 | 1    | 0.1  | 0.1  | 0.15 | 0.08 | 0.16 |
| chr19 | 28837811 | 28838024 | Gm6788    | ENSMUSG000000090737 | 3    | 0.87 | 0.97 | 0.91 | 0.92 | 0.93 | 0.94 |
| chr19 | 36628437 | 36629545 | Hectd2    | ENSMUSG000000041180 | -138 | 0.13 | 0.19 | 0.12 | 0.15 | 0.1  | 0.12 |
| chr19 | 42854143 | 42854585 | Hps1      | ENSMUSG000000025188 | 85   | 0.14 | 0.26 | 0.09 | 0.16 | 0.07 | 0.11 |
| chr19 | 44220611 | 44220948 | Bloc1s2   | ENSMUSG000000057506 | 157  | 0.07 | 0.09 | 0.16 | 0.15 | 0.26 | 0.2  |
| chr19 | 61304402 | 61304615 | Csf2ra    | ENSMUSG000000059326 | -187 | 0.83 | 0.78 | 0.61 | 0.51 | 0.6  | 0.54 |
| chr19 | 45227884 | 45228709 | Tlx1      | ENSMUSG000000025215 | 1073 | 0.14 | 0.19 | 0.11 | 0.11 | 0.38 | 0.21 |
| chr19 | 47611501 | 47611737 | Obfc1     | ENSMUSG000000042694 | -109 | 1    | 0.07 | 0.07 | 0.26 | 0.11 | 0.16 |
| chr19 | 3685805  | 3686592  | Lrp5      | ENSMUSG000000024913 | 358  | 0.11 | 0.11 | 0.08 | 0.12 | 0.08 | 0.11 |
| chr19 | 5567312  | 5568412  | Gm962     | ENSMUSG000000049562 | -212 | 0.2  | 0.12 | 0.13 | 0.15 | 0.1  | 0.1  |
| chr19 | 6061018  | 6061919  | Znhit2-ps | ENSMUSG000000075227 | 276  | 0.15 | 0.15 | 0.11 | 0.14 | 0.1  | 0.15 |
| chr19 | 16510833 | 16511390 | Gna14     | ENSMUSG000000024697 | 954  | 0.13 | 0.17 | 0.11 | 0.16 | 0.09 | 0.13 |
| chr19 | 23761625 | 23762382 | Ptar1     | ENSMUSG000000074925 | 113  | 0.09 | 0.13 | 0.1  | 0.14 | 0.07 | 0.08 |
| chr19 | 43764037 | 43764619 | Entpd7    | ENSMUSG000000025192 | 166  | 0.16 | 0.13 | 0.15 | 0.16 | 0.28 | 0.16 |
| chr19 | 45307989 | 45310154 | Lbx1      | ENSMUSG000000025216 | 1230 | 0.13 | 0.15 | 0.12 | 0.18 | 0.11 | 0.15 |
| chr19 | 24630028 | 24630897 | Pip5k1b   | ENSMUSG000000024867 | -183 | 0.16 | 0.13 | 0.11 | 0.16 | 0.11 | 0.12 |
| chr19 | 5366235  | 5367518  | Banf1     | ENSMUSG000000024844 | -529 | 0.12 | 0.1  | 0.08 | 0.13 | 0.09 | 0.13 |
| chr19 | 6996215  | 6996537  | Esrra     | ENSMUSG000000024955 | -125 | 0.62 | 0.75 | 0.17 | 0.19 | 0.33 | 0.18 |
| chr19 | 42687207 | 42687570 | Loxl4     | ENSMUSG000000025185 | -126 | 0.15 | 0.11 | 0.09 | 0.13 | 0.1  | 0.08 |
| chr19 | 46392080 | 46392700 | Psd       | ENSMUSG000000037126 | -49  | 0.09 | 0.24 | 0.1  | 0.11 | 0.07 | 0.18 |
| chr19 | 47253093 | 47254126 | Neur1fa   | ENSMUSG000000006435 | 299  | 0.12 | 0.11 | 0.1  | 0.16 | 0.09 | 0.16 |
| chr19 | 4099936  | 4101176  | Pitpm1    | ENSMUSG000000024851 | 558  | 0.21 | 0.3  | 0.12 | 0.12 | 0.14 | 0.15 |
| chr19 | 39005032 | 39006036 | Hells     | ENSMUSG000000025001 | 129  | 0.12 | 0.18 | 0.14 | 0.18 | 0.07 | 0.17 |
| chr19 | 7114925  | 7115168  | Stip1     | ENSMUSG000000024966 | -530 | 0.5  | NA   | 0.14 | 0.27 | 0.24 | 0.09 |
| chr19 | 34821465 | 34821913 | Slc16a12  | ENSMUSG000000009378 | 90   | 0.28 | 0.23 | 0.14 | 0.22 | 0.2  | 0.17 |

|       |          |          |               |                     |      |      |      |      |      |      |      |
|-------|----------|----------|---------------|---------------------|------|------|------|------|------|------|------|
| chr19 | 6334996  | 6335806  | Men1          | ENSMUSG00000024947  | 388  | 0.13 | 0.2  | 0.1  | 0.16 | 0.07 | 0.1  |
| chr19 | 47911687 | 47912004 | Wdr96         | ENSMUSG00000044948  | 6    | 0.21 | 0.18 | 0.11 | 0.19 | 0.1  | 0.1  |
| chr19 | 6235534  | 6235910  | Ppp2r5b       | ENSMUSG00000024777  | 121  | 0.2  | 0.08 | 0.1  | 0.29 | 0.08 | 0.14 |
| chr19 | 45063754 | 45064152 | Sema4g        | ENSMUSG00000025207  | 172  | 0.11 | 0.12 | 0.07 | 0.17 | 0.06 | 0.14 |
| chr19 | 46764338 | 46764640 | 2010012O05Rik | ENSMUSG000000062376 | 93   | 0.67 | 0.06 | 0.1  | 0.1  | 0.23 | 0.15 |
| chr19 | 23215369 | 23217167 | Klf9          | ENSMUSG000000033863 | 552  | 0.14 | 0.1  | 0.11 | 0.17 | 0.17 | 0.12 |
| chr19 | 29038331 | 29039149 | 4430402I18Rik | ENSMUSG000000064202 | -342 | 0.1  | 0.13 | 0.1  | 0.13 | 0.07 | 0.17 |
| chr19 | 30613935 | 30614289 | Ppp1r2-ps3    | ENSMUSG000000058816 | -68  | 0.06 | 0.09 | 0.09 | 0.08 | 0.08 | 0.14 |
| chr19 | 6341253  | 6341571  | Map4k2        | ENSMUSG000000024948 | 142  | 0.12 | 0.07 | 0.11 | 0.15 | 0.08 | 0.12 |
| chr19 | 5637165  | 5638125  | Rela          | ENSMUSG000000024927 | 162  | 0.13 | 0.17 | 0.09 | 0.12 | 0.19 | 0.14 |
| chr19 | 7016871  | 7017152  | Gpr137        | ENSMUSG000000024958 | -71  | 1    | 0.71 | 0.13 | 0.31 | 0.15 | 0.15 |
| chr19 | 18824186 | 18824502 | Trpm6         | ENSMUSG000000024727 | -129 | 0.22 | 0.31 | 0.2  | 0.18 | 0.3  | 0.18 |
| chr19 | 53603191 | 53604199 | Dusp5         | ENSMUSG000000034765 | 96   | 0.16 | 0.11 | 0.09 | 0.13 | 0.13 | 0.12 |
| chr19 | 36908645 | 36909397 | Tnks2         | ENSMUSG000000024811 | 299  | 0.11 | 0.14 | 0.08 | 0.16 | 0.13 | 0.14 |
| chr19 | 7342868  | 7343560  | Rcor2         | ENSMUSG000000024968 | 423  | 0.09 | 0.08 | 0.07 | 0.09 | 0.07 | 0.1  |
| chr19 | 53384821 | 53385838 | Mxi1          | ENSMUSG000000025025 | 333  | 0.38 | 0.28 | 0.19 | 0.17 | 0.3  | 0.21 |
| chr19 | 58528166 | 58528395 | Gfra1         | ENSMUSG000000025089 | 676  | 0.14 | NA   | 0.07 | 0.07 | 0.36 | 0.16 |
| chr19 | 4214334  | 4215570  | Clcf1         | ENSMUSG000000040663 | 358  | 0.16 | 0.1  | 0.12 | 0.19 | 0.13 | 0.17 |
| chr19 | 53403771 | 53404524 | Mxi1          | ENSMUSG000000025025 | 244  | 0.29 | 0.16 | 0.09 | 0.22 | 0.16 | 0.14 |
| chr19 | 4305612  | 4306052  | Adrbk1        | ENSMUSG000000024858 | 123  | 0.13 | 0.18 | 0.1  | 0.18 | 0.19 | 0.16 |
| chr19 | 5601918  | 5602375  | Rnaseh2c      | ENSMUSG000000024925 | 171  | 0.29 | 0.11 | 0.07 | 0.1  | 0.09 | 0.08 |
| chr19 | 8787844  | 8788487  | Slc3a2        | ENSMUSG000000010095 | 222  | 0.11 | 0.05 | 0.08 | 0.13 | 0.18 | 0.13 |
| chr19 | 10115725 | 10116538 | Fads3         | ENSMUSG000000024664 | 93   | 0.17 | 0.09 | 0.11 | 0.16 | 0.12 | 0.13 |
| chr19 | 5688157  | 5689048  | Pcnx3         | ENSMUSG000000054874 | 93   | 0.2  | 0.25 | 0.11 | 0.17 | 0.15 | 0.14 |
| chr19 | 40905455 | 40906610 | Ccnj          | ENSMUSG000000025010 | 263  | 0.12 | 0.2  | 0.08 | 0.15 | 0.1  | 0.12 |
| chr19 | 6497392  | 6498652  | Nrxn2         | ENSMUSG000000033768 | 351  | 0.16 | 0.14 | 0.13 | 0.15 | 0.14 | 0.1  |
| chr19 | 16058982 | 16059610 | Cep78         | ENSMUSG000000041491 | 183  | 0.22 | 0.07 | 0.09 | 0.09 | 0.3  | 0.15 |
| chr19 | 5510653  | 5511028  | Snx32         | ENSMUSG000000056185 | -351 | 0.34 | 1    | 0.2  | 0.34 | 0.42 | 0.17 |
| chr19 | 6531059  | 6532002  | Gm14964       | ENSMUSG000000052188 | 258  | 0.17 | 0.24 | 0.31 | 0.39 | 0.24 | 0.23 |
| chr19 | 38298512 | 38298758 | 5730455O13Rik | ENSMUSG000000054237 | -7   | 0.5  | 0.1  | 0.11 | 0.1  | 0.09 | 0.07 |

|       |          |          |               |                     |      |      |      |      |      |      |      |
|-------|----------|----------|---------------|---------------------|------|------|------|------|------|------|------|
| chr19 | 8945962  | 8946444  | Ubxn1         | ENSMUSG00000071655  | 154  | 0.15 | 0.26 | 0.12 | 0.22 | 0.21 | 0.09 |
| chr19 | 12670345 | 12670833 | A330040F15Rik | ENSMUSG00000086213  | 467  | 0.28 | 0.14 | 0.18 | 0.19 | 0.21 | 0.23 |
| chr19 | 21346284 | 21347593 | Zfand5        | ENSMUSG000000024750 | 170  | 0.2  | 0.32 | 0.1  | 0.14 | 0.16 | 0.13 |
| chr19 | 38198975 | 38199525 | Rbp4          | ENSMUSG000000024990 | 51   | 0.24 | 0.09 | 0.09 | 0.16 | 0.13 | 0.09 |
| chr19 | 4012492  | 4012835  | Ndufv1        | ENSMUSG000000037916 | -2   | 1    | 0.22 | 0.29 | 0.26 | 0.18 | 0.12 |
| chr19 | 4148474  | 4148828  | Coro1b        | ENSMUSG000000024835 | 32   | 0.21 | 0.19 | 0.11 | 0.22 | 0.42 | 0.11 |
| chr19 | 44358622 | 44358978 | AC123853.1    | ENSMUSG000000092983 | 980  | 0.19 | 0.17 | 0.04 | 0.1  | 0.13 | 0.11 |
| chr19 | 28085737 | 28086529 | Rfx3          | ENSMUSG000000040929 | -477 | 0.07 | 0.12 | 0.11 | 0.11 | 0.09 | 0.12 |
| chr19 | 44830066 | 44831997 | Pax2          | ENSMUSG000000004231 | 492  | 0.11 | 0.16 | 0.09 | 0.13 | 0.13 | 0.13 |
| chr19 | 56622889 | 56623483 | Nhlrc2        | ENSMUSG000000025078 | 435  | 0.12 | 0.18 | 0.09 | 0.1  | 0.11 | 0.16 |
| chr19 | 5424402  | 5425638  | Drap1         | ENSMUSG000000024914 | -506 | 0.14 | 0.11 | 0.1  | 0.19 | 0.19 | 0.16 |
| chr19 | 10092620 | 10092892 | Rab3ii1       | ENSMUSG000000024663 | 73   | 0.33 | 0.09 | 0.07 | 0.09 | 0.14 | 0.08 |
| chr19 | 32830471 | 32832836 | Pten          | ENSMUSG000000013663 | -334 | 0.16 | 0.2  | 0.1  | 0.16 | 0.19 | 0.15 |
| chr19 | 38470390 | 38470844 | Tmem20        | ENSMUSG000000044026 | 147  | 0.1  | 0.08 | 0.09 | 0.13 | 0.08 | 0.1  |
| chr19 | 6399414  | 6400169  | Rasgrp2       | ENSMUSG000000032946 | 335  | 0.23 | 0.34 | 0.11 | 0.19 | 0.17 | 0.13 |
| chr19 | 8848807  | 8849482  | Tmem179b      | ENSMUSG000000079437 | -187 | 0.37 | 0.16 | 0.11 | 0.24 | 0.29 | 0.12 |
| chr19 | 55816835 | 55817731 | Tcf7l2        | ENSMUSG000000024985 | 429  | 0.09 | 0.32 | 0.09 | 0.16 | 0.06 | 0.15 |
| chr19 | 45100382 | 45100743 | AC132957.1    | ENSMUSG000000092762 | 1459 | 0.84 | 0.84 | 0.63 | 0.56 | 0.9  | 0.73 |
| chr19 | 3323338  | 3324182  | Cpt1a         | ENSMUSG000000024900 | 459  | 0.08 | 0.14 | 0.09 | 0.18 | 0.05 | 0.13 |
| chr19 | 32786403 | 32786934 | Atad1         | ENSMUSG000000013662 | 144  | 0.15 | 0.13 | 0.11 | 0.15 | 0.12 | 0.12 |
| chr19 | 42164706 | 42165528 | Pi4k2a        | ENSMUSG000000025178 | 192  | 0.35 | 0.24 | 0.18 | 0.25 | 0.3  | 0.24 |
| chr19 | 4942565  | 4943186  | Pell3         | ENSMUSG000000024901 | 171  | 0.27 | 0.19 | 0.12 | 0.13 | 0.21 | 0.14 |
| chr19 | 5559932  | 5561254  | Ovol1         | ENSMUSG000000024922 | -18  | 0.21 | 0.15 | 0.11 | 0.14 | 0.19 | 0.16 |
| chr19 | 10463902 | 10464258 | Syt7          | ENSMUSG000000024743 | 107  | 0.14 | 0.32 | 0.15 | 0.19 | 0.11 | 0.15 |
| chr19 | 29722287 | 29722929 | Ermp1         | ENSMUSG000000046324 | 69   | 0.21 | 0.25 | 0.12 | 0.22 | 0.19 | 0.16 |
| chr19 | 5098312  | 5098610  | Cnih2         | ENSMUSG000000024873 | -43  | 0.13 | 0.22 | 0.1  | 0.1  | 0.06 | 0.11 |
| chr19 | 6140554  | 6141406  | Batf2         | ENSMUSG000000039699 | -3   | 0.14 | 0.08 | 0.1  | 0.12 | 0.09 | 0.12 |
| chr19 | 7131004  | 7131739  | MacroD1       | ENSMUSG000000036278 | 113  | 0.09 | 0.22 | 0.1  | 0.12 | 0.07 | 0.11 |
| chr19 | 7568483  | 7569482  | Atf3          | ENSMUSG000000024759 | 452  | 0.24 | 0.23 | 0.1  | 0.21 | 0.27 | 0.12 |
| chr19 | 11986618 | 11987476 | Patl1         | ENSMUSG000000046139 | 158  | 0.12 | 0.24 | 0.15 | 0.13 | 0.15 | 0.1  |



|       |          |          |            |                     |      |      |      |      |      |      |      |
|-------|----------|----------|------------|---------------------|------|------|------|------|------|------|------|
| chr19 | 38171442 | 38172223 | O3far1     | ENSMUSG00000054200  | 263  | 0.55 | 0.25 | 0.14 | 0.1  | 0.65 | 0.11 |
| chr19 | 4282779  | 4283399  | Ankrd13d   | ENSMUSG00000005986  | -56  | 0.28 | 0.64 | 0.16 | 0.19 | 0.4  | 0.19 |
| chr19 | 11893016 | 11893659 | Stx3       | ENSMUSG000000041488 | 46   | 0.1  | 0.13 | 0.08 | 0.09 | 0.07 | 0.1  |
| chr19 | 60656288 | 60657208 | AC108409.1 | ENSMUSG000000092655 | 316  | 0.11 | 0.13 | 0.13 | 0.18 | 0.09 | 0.2  |
| chr19 | 7015682  | 7016671  | Gpr137     | ENSMUSG000000024958 | -493 | 0.16 | 0.17 | 0.11 | 0.19 | 0.13 | 0.16 |
| chr19 | 8810270  | 8810534  | Wdr74      | ENSMUSG000000042729 | 73   | 0.12 | 1    | 0.09 | 0.24 | 0.08 | 0.11 |
| chr19 | 5068088  | 5068579  | Cd248      | ENSMUSG000000056481 | 255  | 0.15 | 0.14 | 0.1  | 0.15 | 0.18 | 0.16 |
| chr19 | 11023269 | 11023893 | Ccdc86     | ENSMUSG000000024732 | 175  | 0.07 | 0.11 | 0.13 | 0.12 | 0.12 | 0.17 |
| chr19 | 41817576 | 41818365 | Slit1      | ENSMUSG000000025020 | 6    | 0.16 | 0.13 | 0.13 | 0.17 | 0.19 | 0.15 |
| chr19 | 42222055 | 42222978 | Marveld1   | ENSMUSG000000044345 | 626  | 0.1  | 0.1  | 0.12 | 0.14 | 0.08 | 0.23 |
| chr19 | 10763146 | 10763709 | Vps37c     | ENSMUSG000000048832 | 122  | 0.22 | 0.1  | 0.09 | 0.16 | 0.18 | 0.13 |
| chr19 | 46119352 | 46120038 | Pprc1      | ENSMUSG000000055491 | 319  | 0.05 | 0.08 | 0.09 | 0.17 | 0.07 | 0.11 |
| chr19 | 9063725  | 9064420  | Ahnak      | ENSMUSG000000069833 | 322  | 0.08 | 0.08 | 0.09 | 0.14 | 0.1  | 0.1  |
| chr19 | 44619960 | 44620371 | Sec31b     | ENSMUSG000000051984 | 172  | 0.19 | 0.24 | 0.15 | 0.18 | 0.14 | 0.14 |
| chr19 | 45089640 | 45090312 | Lzts2      | ENSMUSG000000035342 | 310  | 0.07 | 0.1  | 0.06 | 0.1  | 0.11 | 0.1  |
| chr19 | 59240685 | 59241271 | Vax1       | ENSMUSG000000006270 | 492  | 0.09 | 0.12 | 0.11 | 0.15 | 0.06 | 0.13 |
| chr19 | 5085285  | 5085687  | Tmem151a   | ENSMUSG000000061451 | 1    | 0.17 | 0.15 | 0.09 | 0.1  | 0.2  | 0.19 |
| chr19 | 31838548 | 31839179 | Prkg1      | ENSMUSG000000052920 | 449  | 0.17 | 0.27 | 0.15 | 0.17 | 0.12 | 0.11 |
| chr19 | 53112726 | 53113199 | Xpnpep1    | ENSMUSG000000025027 | 81   | 0.08 | 0.24 | 0.09 | 0.13 | 0.06 | 0.2  |
| chr19 | 56796367 | 56798487 | Adrb1      | ENSMUSG000000035283 | 565  | 0.19 | 0.19 | 0.09 | 0.16 | 0.17 | 0.12 |
| chr19 | 59532405 | 59534474 | Emx2os     | ENSMUSG000000087095 | -314 | 0.24 | 0.25 | 0.12 | 0.22 | 0.25 | 0.18 |
| chr19 | 34548754 | 34549522 | Gm16704    | ENSMUSG000000085164 | -160 | 0.15 | 0.61 | 0.18 | 0.23 | 0.25 | 0.18 |
| chr19 | 42275953 | 42276830 | Sfrp5      | ENSMUSG000000018822 | 351  | 0.06 | 0.06 | 0.09 | 0.15 | 0.18 | 0.2  |
| chr19 | 45857229 | 45858355 | Mgea5      | ENSMUSG000000025220 | 218  | 0.2  | 0.16 | 0.13 | 0.13 | 0.23 | 0.13 |
| chr19 | 9016226  | 9017206  | Mta2       | ENSMUSG000000071646 | 351  | 0.1  | 0.1  | 0.09 | 0.15 | 0.09 | 0.11 |
| chr19 | 16206839 | 16208227 | Gnaq       | ENSMUSG000000024639 | 212  | 0.11 | 0.13 | 0.09 | 0.13 | 0.1  | 0.12 |
| chr19 | 42505881 | 42507071 | Crtac1     | ENSMUSG000000042401 | -203 | 0.15 | 0.12 | 0.08 | 0.1  | 0.14 | 0.1  |
| chr19 | 18705782 | 18706676 | Ostf1      | ENSMUSG000000024725 | -21  | 0.11 | 0.12 | 0.13 | 0.16 | 0.13 | 0.16 |
| chr19 | 41557599 | 41558046 | Lcor       | ENSMUSG000000025019 | 695  | 0.1  | 0.08 | 0.09 | 0.15 | 0.13 | 0.13 |
| chr19 | 60865876 | 60866909 | Eif3a      | ENSMUSG000000024991 | 204  | 0.1  | 0.18 | 0.17 | 0.16 | 0.11 | 0.13 |

|       |          |          |               |                    |      |      |      |      |      |      |      |
|-------|----------|----------|---------------|--------------------|------|------|------|------|------|------|------|
| chr19 | 6015453  | 6015722  | Capn1         | ENSMUSG00000024942 | 238  | 0.32 | 0.22 | 0.08 | 0.23 | 0.26 | 0.15 |
| chr19 | 57082489 | 57083025 | Afap1l2       | ENSMUSG00000025083 | -90  | 0.14 | 0.15 | 0.09 | 0.14 | 0.1  | 0.11 |
| chr19 | 5447472  | 5448842  | Fosl1         | ENSMUSG00000024912 | 454  | 0.39 | 0.22 | 0.14 | 0.18 | 0.5  | 0.17 |
| chr19 | 53977549 | 53978502 | Pdcd4         | ENSMUSG00000024975 | 184  | 0.08 | 0.06 | 0.09 | 0.14 | 0.06 | 0.14 |
| chr19 | 55816047 | 55816458 | Tcf7l2        | ENSMUSG00000024985 | -48  | 0.06 | 0.08 | 0.11 | 0.14 | 0.08 | 0.1  |
| chr19 | 59335341 | 59335957 | Slc18a2       | ENSMUSG00000025094 | 281  | 0.2  | 0.14 | 0.12 | 0.21 | 0.14 | 0.1  |
| chr19 | 21727318 | 21728363 | Fam108b       | ENSMUSG00000047368 | 41   | 0.08 | 0.14 | 0.11 | 0.18 | 0.1  | 0.14 |
| chr19 | 5963801  | 5964307  | Pola2         | ENSMUSG00000024833 | 152  | 0.11 | 0.08 | 0.09 | 0.15 | 0.09 | 0.13 |
| chr19 | 24973997 | 24975165 | Foxd4         | ENSMUSG00000051490 | 1218 | 0.2  | 0.13 | 0.12 | 0.14 | 0.19 | 0.18 |
| chr19 | 46150202 | 46150685 | Nolc1         | ENSMUSG00000015176 | 90   | 0.18 | 0.63 | 0.12 | 0.37 | 0.24 | 0.14 |
| chr19 | 8815804  | 8816195  | Stx5a         | ENSMUSG00000010110 | 96   | 0.67 | 1    | 0.12 | 0.47 | 0.41 | 0.19 |
| chr19 | 47653800 | 47654361 | Slk           | ENSMUSG00000025060 | -88  | 0.14 | 0.13 | 0.18 | 0.26 | 0.1  | 0.1  |
| chr19 | 5474521  | 5474859  | Efemp2        | ENSMUSG00000024909 | 2    | 0.14 | 0.27 | 0.09 | 0.1  | 0.24 | 0.09 |
| chr19 | 59419295 | 59420846 | Pdzd8         | ENSMUSG00000074746 | 200  | 0.09 | 0.09 | 0.08 | 0.12 | 0.09 | 0.11 |
| chr19 | 7496586  | 7498218  | 2700081O15Rik | ENSMUSG00000053080 | 1884 | 0.14 | 0.2  | 0.11 | 0.16 | 0.13 | 0.15 |
| chr19 | 60965559 | 60966611 | Grk5          | ENSMUSG00000003228 | 433  | 0.24 | 0.18 | 0.16 | 0.13 | 0.25 | 0.17 |
| chr19 | 10315021 | 10315369 | Gm98          | ENSMUSG00000036098 | 40   | 0.13 | 0.13 | 0.08 | 0.14 | 0.11 | 0.12 |
| chr19 | 27504136 | 27504685 | D19Bwg1357e   | ENSMUSG00000041360 | -100 | 0.21 | 0.58 | 0.14 | 0.18 | 0.19 | 0.19 |
| chr19 | 42330220 | 42330604 | Golga7b       | ENSMUSG00000042532 | 183  | 0.16 | 0.27 | 0.08 | 0.14 | 0.18 | 0.08 |
| chr19 | 12039938 | 12040416 | Osbp          | ENSMUSG00000024687 | -157 | 0.14 | 0.12 | 0.1  | 0.25 | 0.1  | 0.15 |
| chr19 | 44629342 | 44630006 | Ndufb8        | ENSMUSG00000025204 | -198 | 0.25 | 0.06 | 0.16 | 0.1  | 0.29 | 0.23 |
| chr19 | 5106729  | 5107183  | Rab1b         | ENSMUSG00000024870 | 63   | 0.2  | 0.24 | 0.22 | 0.21 | 0.09 | 0.16 |
| chr19 | 27397625 | 27397998 | Kcnv2         | ENSMUSG00000047298 | 733  | 0.91 | 0.72 | 0.92 | 0.94 | 0.92 | 0.97 |
| chr19 | 4793671  | 4794001  | Rbm14         | ENSMUSG00000006456 | 13   | 0.18 | 0.08 | 0.11 | 0.12 | 0.14 | 0.2  |
| chr19 | 10969646 | 10970117 | Prpf19        | ENSMUSG00000024735 | 148  | 0.12 | 0.15 | 0.09 | 0.12 | 0.14 | 0.1  |
| chr19 | 6084754  | 6085356  | Zfp1          | ENSMUSG00000024792 | -161 | 0.14 | 0.15 | 0.12 | 0.34 | 0.16 | 0.19 |
| chr19 | 60831653 | 60833243 | Nanos1        | ENSMUSG00000072437 | 558  | 0.16 | 0.15 | 0.1  | 0.15 | 0.15 | 0.14 |
| chr19 | 3282687  | 3283232  | Ighmbp2       | ENSMUSG00000024831 | -141 | 0.08 | 0.26 | 0.11 | 0.17 | 0.06 | 0.15 |
| chr19 | 28754116 | 28754880 | Glis3         | ENSMUSG00000052942 | -342 | 0.1  | 0.19 | 0.1  | 0.13 | 0.11 | 0.12 |
| chr19 | 29175444 | 29176343 | Rcl1          | ENSMUSG00000024785 | 28   | 0.16 | 0.26 | 0.09 | 0.11 | 0.15 | 0.15 |

|       |          |          |          |                    |      |      |      |      |      |      |      |
|-------|----------|----------|----------|--------------------|------|------|------|------|------|------|------|
| chr19 | 34266942 | 34267278 | Stambpl1 | ENSMUSG00000024776 | -202 | 0.17 | 0.18 | 0.12 | 0.16 | 0.13 | 0.11 |
| chr19 | 10257236 | 10257875 | Fads1    | ENSMUSG00000010663 | 177  | 0.17 | 0.2  | 0.09 | 0.1  | 0.15 | 0.16 |
| chr19 | 41459397 | 41459771 | Pik3ap1  | ENSMUSG00000025017 | -24  | 0.09 | 0.11 | 0.09 | 0.1  | 0.09 | 0.14 |
| chr19 | 3414320  | 3414596  | Gal      | ENSMUSG00000024907 | 14   | 0.08 | 0.1  | 0.1  | 0.16 | 0.08 | 0.15 |
| chr19 | 3575227  | 3576246  | Ppp6r3   | ENSMUSG00000024908 | 13   | 0.15 | 0.44 | 0.16 | 0.26 | 0.17 | 0.19 |
| chr19 | 4037775  | 4038074  | Gstp1    | ENSMUSG00000060803 | -12  | 0.11 | 0.39 | 0.14 | 0.21 | 0.13 | 0.15 |
| chr19 | 4169407  | 4170119  | Gm17552  | ENSMUSG00000090702 | 197  | 0.3  | 0.5  | 0.16 | 0.23 | 0.31 | 0.11 |
| chr19 | 4756353  | 4756833  | Rbm4b    | ENSMUSG00000033760 | 68   | 0.08 | 0.11 | 0.09 | 0.15 | 0.08 | 0.14 |
| chr19 | 4878627  | 4879056  | Zdhhc24  | ENSMUSG00000006463 | 173  | 0.19 | 0.58 | 0.11 | 0.16 | 0.17 | 0.11 |
| chr19 | 5295171  | 5295633  | Sf3b2    | ENSMUSG00000024853 | 53   | 0.2  | NA   | 0.15 | 0.21 | 0.2  | 0.16 |
| chr19 | 5349180  | 5349413  | Cst6     | ENSMUSG00000024846 | 278  | 0.6  | 0.33 | 0.11 | 0.29 | 1    | 0.13 |
| chr19 | 5457066  | 5457505  | Ccdc85b  | ENSMUSG00000042878 | 264  | 0.26 | 1    | 0.16 | 0.16 | 0.28 | 0.18 |
| chr19 | 5460504  | 5460755  | Fibp     | ENSMUSG00000024911 | -8   | 1    | 0.5  | 0.4  | 0.35 | 1    | 0.48 |
| chr19 | 6306139  | 6306859  | Cdc42bpg | ENSMUSG00000024769 | 43   | 0.06 | 0.14 | 0.09 | 0.08 | 0.07 | 0.11 |
| chr19 | 6401468  | 6401689  | Rasgrp2  | ENSMUSG00000032946 | -117 | 0.11 | 0.12 | 0.09 | 0.07 | 0.12 | 0.04 |
| chr19 | 6983866  | 6985125  | Prdx5    | ENSMUSG00000024953 | -388 | 0.23 | 0.49 | 0.1  | 0.22 | 0.23 | 0.18 |
| chr19 | 7044062  | 7044398  | Plcb3    | ENSMUSG00000024960 | 49   | 0.43 | 0.5  | 0.09 | 0.08 | 0.25 | 0.13 |
| chr19 | 7048752  | 7049181  | Ppp1r14b | ENSMUSG00000056612 | -572 | 0.2  | 0.13 | 0.1  | 0.15 | 0.28 | 0.1  |
| chr19 | 7280563  | 7280782  | Otub1    | ENSMUSG00000024767 | 52   | 0.14 | 0.17 | 0.15 | 0.33 | 0.17 | 0.28 |
| chr19 | 7291836  | 7292189  | Cox8a    | ENSMUSG00000035885 | 94   | 0.1  | 0.15 | 0.15 | 0.18 | 0.11 | 0.16 |
| chr19 | 7315463  | 7315864  | Naa40    | ENSMUSG00000024764 | 49   | 0.08 | 0.1  | 0.07 | 0.11 | 0.05 | 0.08 |
| chr19 | 7686834  | 7687253  | Hrasls5  | ENSMUSG00000024973 | 12   | 0.33 | 0.5  | 0.09 | 0.59 | 0.14 | 0.27 |
| chr19 | 8860603  | 8860929  | Taf6l    | ENSMUSG00000003680 | -19  | 0.2  | 0.08 | 0.11 | 0.1  | 0.11 | 0.17 |
| chr19 | 8894286  | 8895378  | Hnrnpul2 | ENSMUSG00000071659 | 941  | 0.1  | 0.1  | 0.08 | 0.14 | 0.1  | 0.14 |
| chr19 | 8962938  | 8963760  | SNORA57  | ENSMUSG00000070167 | -174 | 0.11 | 0.26 | 0.15 | 0.24 | 0.12 | 0.21 |
| chr19 | 8994787  | 8995294  | B3gat3   | ENSMUSG00000071649 | 176  | 0.14 | 0.16 | 0.13 | 0.13 | 0.14 | 0.13 |
| chr19 | 9003870  | 9004556  | Eml3     | ENSMUSG00000071647 | 29   | 0.28 | 0.2  | 0.1  | 0.19 | 0.28 | 0.13 |
| chr19 | 10531044 | 10532303 | Lrrc10b  | ENSMUSG00000090291 | 264  | 0.13 | 0.12 | 0.11 | 0.14 | 0.14 | 0.11 |
| chr19 | 10651568 | 10651951 | Tmem138  | ENSMUSG00000024666 | 93   | 0.11 | 1    | 0.2  | 0.14 | 0.13 | 0.13 |
| chr19 | 10943968 | 10944375 | Tmem132a | ENSMUSG00000024736 | 97   | 0.23 | 0.57 | 0.12 | 0.14 | 0.21 | 0.15 |

|       |          |          |            |                    |      |      |      |      |      |      |      |
|-------|----------|----------|------------|--------------------|------|------|------|------|------|------|------|
| chr19 | 10956148 | 10956557 | Tmem109    | ENSMUSG00000034659 | -164 | 0.17 | 0.12 | 0.13 | 0.21 | 0.16 | 0.11 |
| chr19 | 16854748 | 16855732 | Gm9806     | ENSMUSG00000046388 | 203  | 0.12 | 0.16 | 0.09 | 0.14 | 0.12 | 0.14 |
| chr19 | 17468410 | 17469005 | Rfk        | ENSMUSG00000024712 | 174  | 0.06 | 0.11 | 0.07 | 0.14 | 0.06 | 0.13 |
| chr19 | 23694188 | 23694395 | Gm9493     | ENSMUSG00000044424 | 59   | 1    | 0.93 | 0.88 | 1    | 1    | 0.98 |
| chr19 | 23832713 | 23833154 | Apba1      | ENSMUSG00000024897 | -433 | 0.1  | 0.27 | 0.12 | 0.17 | 0.08 | 0.16 |
| chr19 | 23833498 | 23833803 | Apba1      | ENSMUSG00000024897 | 284  | 0.25 | 0.2  | 0.09 | 0.24 | 0.18 | 0.26 |
| chr19 | 24551406 | 24552151 | Fam122a    | ENSMUSG00000074922 | 68   | 0.07 | 0.1  | 0.08 | 0.11 | 0.07 | 0.13 |
| chr19 | 25073681 | 25074433 | Dock8      | ENSMUSG00000052085 | 38   | 0.07 | 0.1  | 0.07 | 0.14 | 0.07 | 0.11 |
| chr19 | 25684497 | 25685529 | Dmrt3      | ENSMUSG00000042372 | -14  | 0.11 | 0.1  | 0.08 | 0.14 | 0.11 | 0.14 |
| chr19 | 25746473 | 25746981 | Dmrt2      | ENSMUSG00000048138 | -180 | 0.18 | 0.15 | 0.15 | 0.3  | 0.18 | 0.15 |
| chr19 | 31738405 | 31739240 | Prkg1      | ENSMUSG00000052920 | -51  | 0.1  | 0.21 | 0.11 | 0.28 | 0.11 | 0.19 |
| chr19 | 34996523 | 34997046 | Kif20b     | ENSMUSG00000024795 | -64  | 0.09 | 0.14 | 0.08 | 0.13 | 0.09 | 0.13 |
| chr19 | 36811061 | 36811461 | Ppp1r3c    | ENSMUSG00000067279 | -118 | 0.25 | 0.25 | 0.1  | 0.42 | 0.23 | 0.27 |
| chr19 | 36993060 | 36993698 | Fgfbp3     | ENSMUSG00000047632 | 726  | 0.09 | 0.09 | 0.11 | 0.13 | 0.09 | 0.14 |
| chr19 | 37248485 | 37249369 | Cpeb3      | ENSMUSG00000039652 | -342 | 0.1  | 0.09 | 0.08 | 0.11 | 0.1  | 0.13 |
| chr19 | 37450407 | 37451098 | Kif11      | ENSMUSG00000012443 | -141 | 0.3  | 0.33 | 0.12 | 0.19 | 0.25 | 0.11 |
| chr19 | 37761536 | 37762326 | Cyp26c1    | ENSMUSG00000062432 | 1860 | 0.17 | 0.23 | 0.18 | 0.27 | 0.16 | 0.2  |
| chr19 | 41904421 | 41905440 | Frat1      | ENSMUSG00000067199 | 272  | 0.09 | 0.13 | 0.08 | 0.13 | 0.09 | 0.11 |
| chr19 | 42055414 | 42056962 | Mms19      | ENSMUSG00000025159 | -584 | 0.12 | 0.1  | 0.09 | 0.15 | 0.12 | 0.13 |
| chr19 | 43460717 | 43461295 | Hpse2      | ENSMUSG00000074852 | 1795 | 0.14 | 1    | 0.18 | 0.1  | 0.09 | 0.16 |
| chr19 | 45233565 | 45233858 | Gm20424    | ENSMUSG00000092346 | 83   | 0.14 | 0.1  | 0.19 | 0.19 | 0.1  | 0.14 |
| chr19 | 45890241 | 45890615 | Kcnip2     | ENSMUSG00000025221 | -135 | 0.1  | 0.28 | 0.08 | 0.15 | 0.14 | 0.15 |
| chr19 | 46131024 | 46131807 | Pprc1      | ENSMUSG00000055491 | 386  | 0.09 | 0.12 | 0.09 | 0.15 | 0.09 | 0.1  |
| chr19 | 46647605 | 46648082 | Sfxn2      | ENSMUSG00000025036 | -12  | 0.12 | 0.2  | 0.14 | 0.13 | 0.09 | 0.19 |
| chr19 | 47164834 | 47165405 | Usmg5      | ENSMUSG00000071528 | -4   | 0.26 | 0.25 | 0.09 | 0.2  | 0.5  | 0.16 |
| chr19 | 47929356 | 47929873 | Gsto1      | ENSMUSG00000025068 | 154  | 0.33 | 0.17 | 0.19 | 0.21 | 0.28 | 0.19 |
| chr19 | 47993452 | 47993908 | AC126679.1 | ENSMUSG00000092966 | 83   | 0.09 | 0.45 | 0.11 | 0.12 | 0.11 | 0.13 |
| chr19 | 55969913 | 55970116 | Tcf7l2     | ENSMUSG00000024985 | 14   | 0.09 | 0.12 | 0.13 | 0.16 | 0.08 | 0.13 |
| chr19 | 56471340 | 56472033 | Casp7      | ENSMUSG00000025076 | 67   | 0.43 | 0.18 | 0.12 | 0.31 | 0.44 | 0.23 |
| chr19 | 57388934 | 57389510 | Ablim1     | ENSMUSG00000025085 | 179  | 0.1  | 0.25 | 0.13 | 0.14 | 0.09 | 0.22 |

|       |          |          |               |                    |      |      |      |      |      |      |      |
|-------|----------|----------|---------------|--------------------|------|------|------|------|------|------|------|
| chr19 | 58935300 | 58935630 | Hspa12a       | ENSMUSG00000025092 | 9    | 0.08 | 0.14 | 0.11 | 0.21 | 0.09 | 0.18 |
| chr19 | 60950257 | 60950508 | Prdx3         | ENSMUSG00000024997 | 77   | 0.5  | 1    | 0.12 | NA   | 0.3  | 0.26 |
| chr19 | 4121243  | 4121518  | Aip           | ENSMUSG00000024847 | 195  | NA   | 0.06 | 0.12 | 0.08 | 0.11 | 0.19 |
| chr19 | 4698274  | 4698576  | Gm960         | ENSMUSG00000071691 | -110 | NA   | 1    | 0.1  | NA   | 0.14 | 0.5  |
| chr19 | 4962333  | 4962567  | Mrpl11        | ENSMUSG00000024902 | 135  | NA   | 1    | 0.11 | 0.45 | 0.16 | 0.11 |
| chr19 | 5023875  | 5024483  | Slc29a2       | ENSMUSG00000024891 | 173  | NA   | NA   | 0.12 | 0.19 | 0.5  | 0.11 |
| chr19 | 5845806  | 5846028  | Neat1         | ENSMUSG00000092274 | -439 | NA   | 0.2  | 0.16 | 0.2  | 0.22 | 0.16 |
| chr19 | 5875034  | 5875449  | Frmf8         | ENSMUSG00000024816 | -2   | NA   | NA   | 0.25 | 0.26 | 0.08 | 0.18 |
| chr19 | 5893826  | 5894172  | Tigd3         | ENSMUSG00000044390 | 108  | NA   | 0.16 | 0.25 | 0.13 | 0.16 | 0.19 |
| chr19 | 6057665  | 6058189  | Mrpl49        | ENSMUSG0000007338  | -176 | NA   | 0.4  | 0.09 | NA   | NA   | 0.2  |
| chr19 | 6996812  | 6997022  | Esrra         | ENSMUSG00000024955 | -614 | NA   | NA   | 0.23 | NA   | NA   | 0.28 |
| chr19 | 7026338  | 7026671  | Bad           | ENSMUSG00000024959 | 1247 | 0.5  | 0.4  | 0.08 | 0.14 | NA   | 0.17 |
| chr19 | 7049845  | 7050181  | Ppp1r14b      | ENSMUSG00000056612 | 475  | NA   | 0.22 | 0.13 | 0.23 | 0.43 | 0.28 |
| chr19 | 7557324  | 7557878  | Rtn3          | ENSMUSG00000024758 | -13  | NA   | 0.33 | 0.09 | 0.5  | NA   | 0.39 |
| chr19 | 8797479  | 8797899  | Slc3a2        | ENSMUSG00000010095 | 170  | NA   | NA   | 0.75 | NA   | NA   | 0.56 |
| chr19 | 8911867  | 8912220  | Bscl2         | ENSMUSG00000071657 | 86   | NA   | 0.25 | 0.13 | 0.12 | 0.24 | 0.33 |
| chr19 | 9028213  | 9028518  | Tut1          | ENSMUSG00000071645 | 25   | NA   | NA   | 0.21 | 0.33 | NA   | 0.08 |
| chr19 | 9041359  | 9041848  | Eef1g         | ENSMUSG00000071644 | 72   | NA   | NA   | 0.2  | NA   | 1    | 0.73 |
| chr19 | 10056941 | 10057561 | Fth1          | ENSMUSG00000024661 | 58   | NA   | NA   | NA   | NA   | 1    | 1    |
| chr19 | 10278188 | 10278443 | Fen1          | ENSMUSG00000024742 | 69   | NA   | 0.11 | 0.08 | 0.15 | 0.06 | 0.17 |
| chr19 | 10463161 | 10463405 | Syt7          | ENSMUSG00000024743 | -297 | NA   | NA   | NA   | 1    | NA   | NA   |
| chr19 | 10679893 | 10680442 | Dak           | ENSMUSG00000034371 | -245 | NA   | 0.13 | 0.09 | 0.13 | NA   | 0.22 |
| chr19 | 17030375 | 17030717 | Prune2        | ENSMUSG00000039126 | -62  | NA   | NA   | 0.16 | 0.1  | NA   | 0.28 |
| chr19 | 18745207 | 18746002 | 2410127L17Rik | ENSMUSG00000024726 | 334  | NA   | 0.14 | 0.1  | 0.22 | 0.22 | 0.18 |
| chr19 | 19184665 | 19185222 | Rorb          | ENSMUSG00000036192 | 743  | NA   | 0.05 | 0.06 | 0.31 | 0.04 | 0.19 |
| chr19 | 21546763 | 21547133 | Gda           | ENSMUSG00000058624 | 130  | NA   | NA   | 0.19 | 1    | NA   | 0.5  |
| chr19 | 22213337 | 22213791 | Trpm3         | ENSMUSG00000052387 | -45  | NA   | 0.2  | 0.11 | 0.14 | 0.07 | 0.07 |
| chr19 | 25036063 | 25036318 | Cbwd1         | ENSMUSG00000024878 | -142 | NA   | 0.25 | 0.17 | 0.11 | NA   | 0.11 |
| chr19 | 25484469 | 25484852 | Kank1         | ENSMUSG00000032702 | -97  | NA   | NA   | NA   | NA   | NA   | 1    |
| chr19 | 27293380 | 27293615 | Vldlr         | ENSMUSG00000024924 | 1423 | NA   | NA   | 0.1  | 0.09 | 0.09 | 0.11 |

|       |           |           |               |                    |      |      |      |      |      |      |      |
|-------|-----------|-----------|---------------|--------------------|------|------|------|------|------|------|------|
| chr19 | 29436226  | 29436533  | 5033414D02Rik | ENSMUSG00000016495 | -65  | 1    | NA   | 0.09 | 0.17 | NA   | 0.23 |
| chr19 | 37760932  | 37761147  | Cyp26c1       | ENSMUSG00000062432 | 968  | NA   | NA   | NA   | 1    | NA   | 0.69 |
| chr19 | 38129114  | 38129841  | Cep55         | ENSMUSG00000024989 | -38  | NA   | 0.19 | 0.09 | 0.14 | 0.06 | 0.15 |
| chr19 | 40686396  | 40686943  | Tctn3         | ENSMUSG00000025008 | 9    | NA   | 0.23 | 0.21 | 0.13 | 0.23 | 0.19 |
| chr19 | 41876077  | 41876558  | Arhgap19      | ENSMUSG00000025154 | 220  | 0.33 | 0.5  | 0.11 | 0.12 | NA   | 0.13 |
| chr19 | 41970383  | 41970675  | Rrp12         | ENSMUSG00000035049 | 114  | NA   | 0.33 | 0.11 | 0.21 | 1    | 0.15 |
| chr19 | 45063440  | 45063679  | Sema4g        | ENSMUSG00000025207 | -32  | 0.62 | 0.33 | 0.33 | NA   | NA   | 0.25 |
| chr19 | 45310433  | 45310754  | Lbx1          | ENSMUSG00000025216 | -292 | NA   | 0.78 | 0.17 | 0.27 | 0.47 | 0.31 |
| chr19 | 46221878  | 46222342  | Pitx3         | ENSMUSG00000025229 | 755  | NA   | NA   | NA   | NA   | 1    | NA   |
| chr19 | 46227169  | 46227387  | Gbf1          | ENSMUSG00000025224 | 215  | NA   | NA   | 0.11 | 0.26 | 0.16 | 0.15 |
| chr19 | 46412864  | 46413275  | Cuedc2        | ENSMUSG00000036748 | 81   | NA   | NA   | 0.06 | 0.3  | 0.11 | 0.19 |
| chr19 | 46431294  | 46431616  | Tmem180       | ENSMUSG00000025227 | 85   | NA   | NA   | 0.17 | NA   | NA   | 0.6  |
| chr19 | 47036201  | 47036493  | Nt5c2         | ENSMUSG00000025041 | 494  | NA   | NA   | NA   | NA   | 1    | NA   |
| chr19 | 47654805  | 47655119  | Slk           | ENSMUSG00000025060 | 453  | NA   | 1    | 0.15 | 0.21 | NA   | 0.33 |
| chr19 | 47939847  | 47940399  | Gsto2         | ENSMUSG00000025069 | 88   | 0.67 | NA   | 0.13 | 0.33 | NA   | 0.16 |
| chr19 | 53604309  | 53604602  | Dusp5         | ENSMUSG00000034765 | 856  | NA   | 1    | 0.1  | 0.18 | 0.31 | 0.12 |
| chr19 | 60543089  | 60543775  | Prlhr         | ENSMUSG00000045052 | 775  | NA   | 0.54 | 0.15 | 0.46 | 0.4  | 0.22 |
| chr2  | 119568011 | 119569161 | Itprka        | ENSMUSG00000027296 | 513  | 0.27 | 0.06 | 0.12 | 0.13 | 0.09 | 0.16 |
| chr2  | 143740541 | 143741568 | Dstn          | ENSMUSG00000015932 | -2   | 0.56 | 0.21 | 0.13 | 0.15 | 0.13 | 0.18 |
| chr2  | 74549899  | 74550452  | Hoxd3         | ENSMUSG00000079277 | 189  | 0.28 | 0.14 | 0.12 | 0.08 | 0.07 | 0.13 |
| chr2  | 48669216  | 48670460  | Acvr2a        | ENSMUSG00000052155 | 209  | 0.56 | 0.24 | 0.16 | 0.24 | 0.17 | 0.17 |
| chr2  | 20889644  | 20891318  | Arhgap21      | ENSMUSG00000036591 | -370 | 0.5  | 0.22 | 0.11 | 0.16 | 0.17 | 0.17 |
| chr2  | 12931596  | 12932918  | C1ql3         | ENSMUSG00000049630 | 1117 | 0.3  | 0.17 | 0.13 | 0.19 | 0.14 | 0.17 |
| chr2  | 127657188 | 127657727 | Bub1          | ENSMUSG00000027379 | 83   | 0.9  | 0.39 | 0.09 | 0.48 | 0.22 | 0.14 |
| chr2  | 181022263 | 181022866 | Gmeb2         | ENSMUSG00000038705 | 157  | 0.54 | 0.59 | 0.21 | 0.59 | 0.31 | 0.17 |
| chr2  | 32836880  | 32837586  | Slc2a8        | ENSMUSG00000026791 | 304  | 0.38 | 0.18 | 0.08 | 0.16 | 0.09 | 0.16 |
| chr2  | 33226789  | 33227248  | Ralgps1       | ENSMUSG00000038831 | -28  | 0.37 | 0.11 | 0.09 | 0.11 | 0.1  | 0.15 |
| chr2  | 122293270 | 122293860 | Bambi-ps1     | ENSMUSG00000081219 | -303 | 1    | 0.16 | 0.16 | 0.23 | 0.19 | 0.16 |
| chr2  | 128891604 | 128892088 | Ttl           | ENSMUSG00000027394 | 168  | 0.47 | 0.15 | 0.12 | 0.09 | 0.06 | 0.15 |
| chr2  | 104966448 | 104967663 | AI314831      | ENSMUSG00000074987 | -495 | 0.42 | 0.1  | 0.12 | 0.23 | 0.07 | 0.15 |

|      |           |           |               |                    |       |      |      |      |      |      |      |
|------|-----------|-----------|---------------|--------------------|-------|------|------|------|------|------|------|
| chr2 | 136941099 | 136943363 | Jag1          | ENSMUSG00000027276 | 149   | 0.46 | 0.28 | 0.18 | 0.19 | 0.29 | 0.15 |
| chr2 | 174264241 | 174264578 | Ctsz          | ENSMUSG00000016256 | 8     | 0.63 | 0.13 | 0.09 | 0.17 | 0.14 | 0.16 |
| chr2 | 150295820 | 150296024 | Gm14127       | ENSMUSG00000082740 | -21   | 0.57 | 0.69 | 0.68 | 0.75 | 0.79 | 0.9  |
| chr2 | 144194622 | 144195040 | Csrp2bp       | ENSMUSG00000027425 | 112   | 0.2  | 0.07 | 0.09 | 0.1  | 0.06 | 0.12 |
| chr2 | 25837724  | 25839460  | Camsap1       | ENSMUSG00000026933 | -16   | 0.17 | 0.14 | 0.08 | 0.18 | 0.07 | 0.14 |
| chr2 | 28773198  | 28773665  | Barhl1        | ENSMUSG00000026805 | -1243 | 0.43 | 0.28 | 0.16 | 0.12 | 0.14 | 0.15 |
| chr2 | 148506675 | 148507180 | Gzf1          | ENSMUSG00000027439 | 168   | 0.48 | 0.08 | 0.14 | 0.19 | 0.11 | 0.11 |
| chr2 | 125548942 | 125549394 | Shc4          | ENSMUSG00000035109 | -45   | 0.36 | 0.35 | 0.15 | 0.18 | 0.11 | 0.18 |
| chr2 | 26244358  | 26245008  | Sdccag3       | ENSMUSG00000026927 | 2     | 0.28 | 0.12 | 0.09 | 0.14 | 0.07 | 0.09 |
| chr2 | 138082272 | 138082959 | Btbd3         | ENSMUSG00000062098 | 314   | 0.33 | 0.13 | 0.13 | 0.15 | 0.09 | 0.14 |
| chr2 | 144353051 | 144353815 | 6330439K17Rik | ENSMUSG00000037259 | -333  | 1    | 0.15 | 0.14 | 0.21 | 0.12 | 0.13 |
| chr2 | 56966670  | 56967498  | Nr4a2         | ENSMUSG00000026826 | -300  | 0.27 | 0.1  | 0.08 | 0.18 | 0.11 | 0.14 |
| chr2 | 74600864  | 74601888  | 6720416L17Rik | ENSMUSG00000075277 | -423  | 0.35 | 0.15 | 0.19 | 0.17 | 0.15 | 0.13 |
| chr2 | 79475224  | 79476422  | Ssfa2         | ENSMUSG00000027007 | 314   | 0.27 | 0.24 | 0.13 | 0.14 | 0.08 | 0.17 |
| chr2 | 122463474 | 122463743 | AA467197      | ENSMUSG00000033213 | 22    | 1    | 0.58 | 0.05 | 0.05 | 0.06 | 0.15 |
| chr2 | 132607120 | 132607518 | Chgb          | ENSMUSG00000027350 | 305   | 1    | 0.17 | 0.15 | 0.2  | 0.05 | 0.17 |
| chr2 | 164793376 | 164794357 | Slc12a5       | ENSMUSG00000017740 | 383   | 0.28 | 0.15 | 0.11 | 0.21 | 0.13 | 0.13 |
| chr2 | 179959714 | 179960782 | Lama5         | ENSMUSG00000015647 | 316   | 0.23 | 0.33 | 0.11 | 0.12 | 0.1  | 0.16 |
| chr2 | 104856786 | 104857297 | Eif3m         | ENSMUSG00000027170 | 159   | 0.32 | 0.13 | 0.12 | 0.2  | 0.09 | 0.09 |
| chr2 | 62502332  | 62502675  | Gca           | ENSMUSG00000026893 | 161   | 0.92 | 0.42 | 0.15 | 0.17 | 0.28 | 0.14 |
| chr2 | 129023907 | 129024972 | Slc20a1       | ENSMUSG00000027397 | -61   | 0.29 | 0.09 | 0.14 | 0.14 | 0.11 | 0.16 |
| chr2 | 34262223  | 34262729  | Mapkap1       | ENSMUSG00000038696 | 185   | 0.24 | 0.13 | 0.16 | 0.14 | 0.08 | 0.13 |
| chr2 | 105516210 | 105516827 | Pax6          | ENSMUSG00000027168 | 233   | 0.43 | 0.18 | 0.12 | 0.28 | 0.12 | 0.15 |
| chr2 | 73150550  | 73150953  | Cir1          | ENSMUSG00000041777 | -128  | 0.53 | 0.25 | 0.17 | 0.18 | 0.12 | 0.19 |
| chr2 | 125072926 | 125073694 | Dut           | ENSMUSG00000027203 | 384   | 0.28 | 0.1  | 0.1  | 0.15 | 0.07 | 0.11 |
| chr2 | 181316464 | 181316765 | Uckl1         | ENSMUSG00000089917 | 63    | 0.58 | 0.18 | 0.08 | 0.28 | 0.19 | 0.1  |
| chr2 | 27281229  | 27282872  | Vav2          | ENSMUSG00000009621 | 382   | 0.21 | 0.2  | 0.11 | 0.15 | 0.11 | 0.14 |
| chr2 | 166538974 | 166539848 | Prex1         | ENSMUSG00000039621 | -309  | 0.25 | 0.17 | 0.14 | 0.09 | 0.09 | 0.18 |
| chr2 | 94081271  | 94081770  | Mir129-2      | ENSMUSG00000065511 | 90    | 0.53 | NA   | 0.11 | 0.41 | 0.11 | 0.2  |
| chr2 | 180510752 | 180511767 | Bhlhe23       | ENSMUSG00000045493 | 195   | 0.41 | 0.23 | 0.14 | 0.25 | 0.13 | 0.15 |

|      |           |           |               |                    |      |      |      |      |      |      |      |
|------|-----------|-----------|---------------|--------------------|------|------|------|------|------|------|------|
| chr2 | 129626059 | 129627689 | Stk35         | ENSMUSG00000037885 | 621  | 0.26 | 0.17 | 0.14 | 0.19 | 0.12 | 0.17 |
| chr2 | 165318358 | 165318945 | 2810408M09Rik | ENSMUSG00000039725 | -35  | 0.67 | 0.06 | 0.09 | 0.08 | 0.03 | 0.15 |
| chr2 | 60800185  | 60801366  | Rbms1         | ENSMUSG00000026970 | 474  | 0.41 | 0.24 | 0.13 | 0.12 | 0.14 | 0.13 |
| chr2 | 44972560  | 44972808  | Zeb2          | ENSMUSG00000026872 | 231  | 0.17 | 0.26 | 0.26 | 0.15 | 0.85 | 0.14 |
| chr2 | 152452708 | 152453308 | Rem1          | ENSMUSG00000000359 | 319  | 0.5  | 0.06 | 0.13 | 0.18 | 0.14 | 0.15 |
| chr2 | 168415630 | 168415946 | Nfatc2        | ENSMUSG00000027544 | -97  | 0.39 | 0.34 | 0.12 | 0.15 | 0.13 | 0.2  |
| chr2 | 174110148 | 174110891 | Gnas          | ENSMUSG00000027523 | -238 | 0.51 | 0.38 | 0.41 | 0.37 | 0.37 | 0.4  |
| chr2 | 156688500 | 156689373 | 5430405H02Rik | ENSMUSG00000085741 | -306 | 0.21 | 0.12 | 0.1  | 0.13 | 0.09 | 0.17 |
| chr2 | 151805672 | 151806075 | Fam110a       | ENSMUSG00000027459 | 82   | 0.24 | 0.31 | 0.1  | 0.12 | 0.1  | 0.13 |
| chr2 | 127412910 | 127413395 | Mrps5         | ENSMUSG00000027374 | 194  | 0.1  | 0.11 | 0.09 | 0.22 | 0.37 | 0.13 |
| chr2 | 13976704  | 13977842  | Ptpla         | ENSMUSG00000063275 | 374  | 0.31 | 0.2  | 0.1  | 0.18 | 0.12 | 0.14 |
| chr2 | 31427988  | 31428640  | Fubp3         | ENSMUSG00000026843 | 143  | 0.29 | 0.13 | 0.18 | 0.14 | 0.1  | 0.17 |
| chr2 | 180655047 | 180655841 | Ythdf1        | ENSMUSG00000038848 | -352 | 0.24 | 0.13 | 0.08 | 0.17 | 0.1  | 0.11 |
| chr2 | 17969109  | 17969845  | 2810030E01Rik | ENSMUSG00000054074 | 599  | 0.26 | 0.1  | 0.11 | 0.15 | 0.1  | 0.18 |
| chr2 | 73366923  | 73367866  | Wipf1         | ENSMUSG00000075284 | 45   | 0.34 | 0.18 | 0.11 | 0.2  | 0.17 | 0.14 |
| chr2 | 84888249  | 84888784  | Tnks1bp1      | ENSMUSG00000033955 | 304  | 1    | 0.33 | 0.17 | 0.22 | 0.27 | 0.25 |
| chr2 | 103636698 | 103637925 | Caprin1       | ENSMUSG00000027184 | -610 | 0.26 | 0.15 | 0.14 | 0.13 | 0.08 | 0.17 |
| chr2 | 80420726  | 80421822  | Nckap1        | ENSMUSG00000027002 | 44   | 0.21 | 0.12 | 0.13 | 0.14 | 0.1  | 0.16 |
| chr2 | 180190986 | 180191710 | Slco4a1       | ENSMUSG00000038963 | 309  | 0.32 | 0.19 | 0.16 | 0.23 | 0.11 | 0.17 |
| chr2 | 114000808 | 114001064 | Aqr           | ENSMUSG00000040383 | 46   | 0.32 | 0.13 | 0.1  | 0.16 | 0.11 | 0.09 |
| chr2 | 118214078 | 118214613 | Eif2ak4       | ENSMUSG00000005102 | -8   | 0.25 | 0.24 | 0.11 | 0.13 | 0.1  | 0.13 |
| chr2 | 181428178 | 181428843 | Rgs19         | ENSMUSG00000002458 | -174 | 0.14 | 0.17 | 0.12 | 0.11 | 0.05 | 0.13 |
| chr2 | 29921606  | 29923066  | Set           | ENSMUSG00000054766 | 360  | 0.24 | 0.23 | 0.19 | 0.19 | 0.13 | 0.2  |
| chr2 | 174152794 | 174156646 | Gnas          | ENSMUSG00000027523 | 1649 | 0.28 | 0.35 | 0.24 | 0.3  | 0.37 | 0.27 |
| chr2 | 118571346 | 118572544 | 5430417L22Rik | ENSMUSG00000074918 | 451  | 0.14 | 0.12 | 0.07 | 0.12 | 0.09 | 0.11 |
| chr2 | 153171160 | 153172495 | 2500004C02Rik | ENSMUSG00000073236 | -281 | 0.29 | 0.21 | 0.15 | 0.18 | 0.14 | 0.17 |
| chr2 | 135484780 | 135485739 | Plcb4         | ENSMUSG00000039943 | -31  | 0.35 | 0.26 | 0.16 | 0.14 | 0.19 | 0.14 |
| chr2 | 126959366 | 126959840 | Ncaph         | ENSMUSG00000034906 | 30   | 0.28 | 0.19 | 0.08 | 0.25 | 0.07 | 0.19 |
| chr2 | 21063494  | 21063874  | Gm13377       | ENSMUSG00000086821 | -103 | 0.27 | 0.09 | 0.18 | 0.13 | 0.08 | 0.17 |
| chr2 | 143688161 | 143688847 | Bfsp1         | ENSMUSG00000027420 | 175  | 0.36 | 0.4  | 0.16 | 0.18 | 0.18 | 0.17 |



|      |           |           |            |                    |      |      |      |      |      |      |      |
|------|-----------|-----------|------------|--------------------|------|------|------|------|------|------|------|
| chr2 | 91550356  | 91551163  | Atg13      | ENSMUSG00000027244 | -83  | 0.19 | 0.1  | 0.1  | 0.14 | 0.07 | 0.14 |
| chr2 | 131386850 | 131388385 | Gm14285    | ENSMUSG00000087524 | 267  | 0.26 | 0.24 | 0.14 | 0.25 | 0.16 | 0.19 |
| chr2 | 144993135 | 144994064 | Slc24a3    | ENSMUSG00000063873 | 109  | 0.29 | 0.22 | 0.11 | 0.19 | 0.17 | 0.11 |
| chr2 | 32306433  | 32307109  | Slc25a25   | ENSMUSG00000026819 | 171  | 0.19 | 0.14 | 0.09 | 0.11 | 0.11 | 0.12 |
| chr2 | 130249413 | 130250560 | Fam113a    | ENSMUSG00000037773 | -2   | 0.33 | 0.34 | 0.13 | 0.16 | 0.12 | 0.19 |
| chr2 | 152169613 | 152169945 | Trib3      | ENSMUSG00000032715 | -126 | 0.57 | 0.07 | 0.15 | 0.12 | 0.16 | 0.18 |
| chr2 | 12223164  | 12223722  | Itga8      | ENSMUSG00000026768 | -228 | 0.05 | 0.14 | 0.13 | 0.19 | 0.18 | 0.13 |
| chr2 | 13714702  | 13715420  | St8sia6    | ENSMUSG00000003418 | -141 | 0.21 | 0.21 | 0.14 | 0.23 | 0.07 | 0.16 |
| chr2 | 180376649 | 180377625 | Tcf5       | ENSMUSG00000038932 | -85  | 0.22 | 0.17 | 0.1  | 0.14 | 0.13 | 0.12 |
| chr2 | 130490037 | 130490403 | Ddrgk1     | ENSMUSG00000068290 | 175  | 0.73 | 0.17 | 0.14 | 0.13 | 0.28 | 0.17 |
| chr2 | 154395057 | 154395934 | E2f1       | ENSMUSG00000027490 | -342 | 0.23 | 0.09 | 0.11 | 0.13 | 0.1  | 0.16 |
| chr2 | 22923577  | 22924130  | Acbd5      | ENSMUSG00000026781 | 165  | 0.35 | 0.18 | 0.09 | 0.1  | 0.08 | 0.12 |
| chr2 | 92210749  | 92211221  | Gylt1b     | ENSMUSG00000040434 | 158  | 0.24 | 0.17 | 0.11 | 0.14 | 0.11 | 0.13 |
| chr2 | 126500344 | 126501685 | Gabpb1     | ENSMUSG00000027361 | 61   | 0.25 | 0.19 | 0.12 | 0.15 | 0.14 | 0.16 |
| chr2 | 31829700  | 31830264  | Nup214     | ENSMUSG0000001855  | 26   | 0.4  | 0.28 | 0.1  | 0.14 | 0.2  | 0.15 |
| chr2 | 74497071  | 74497390  | Evx2       | ENSMUSG0000001815  | 246  | 0.43 | 0.41 | 0.14 | 0.18 | 0.15 | 0.17 |
| chr2 | 120965469 | 120966444 | Lcmt2      | ENSMUSG00000074890 | 158  | 0.3  | 0.08 | 0.09 | 0.21 | 0.13 | 0.15 |
| chr2 | 118536806 | 118537253 | Plcb2      | ENSMUSG00000040061 | 77   | 0.1  | 0.08 | 0.17 | 0.26 | 0.29 | 0.3  |
| chr2 | 170322710 | 170323048 | Cyp24a1    | ENSMUSG00000038567 | -234 | 0.16 | 0.33 | 0.11 | 0.28 | 0.46 | 0.12 |
| chr2 | 30141308  | 30142397  | Dolk       | ENSMUSG00000075419 | 22   | 0.67 | 0.24 | 0.24 | 0.27 | 0.32 | 0.21 |
| chr2 | 28496400  | 28497323  | Tsc1       | ENSMUSG00000026812 | 113  | 0.18 | 0.1  | 0.1  | 0.23 | 0.05 | 0.16 |
| chr2 | 29820811  | 29821698  | Spna2      | ENSMUSG00000057738 | 174  | 0.09 | 0.19 | 0.07 | 0.16 | 0.23 | 0.11 |
| chr2 | 112079407 | 112080042 | Lpcat4     | ENSMUSG00000027134 | 99   | 0.2  | 0.24 | 0.11 | 0.18 | 0.11 | 0.13 |
| chr2 | 168426693 | 168427600 | Nfatc2     | ENSMUSG00000027544 | -108 | 0.21 | 0.31 | 0.08 | 0.18 | 0.1  | 0.11 |
| chr2 | 152673711 | 152673976 | Tpx2       | ENSMUSG00000027469 | 129  | 0.06 | 0.12 | 0.11 | 0.16 | 0.16 | 0.19 |
| chr2 | 69735176  | 69735953  | Ubr3       | ENSMUSG00000044308 | 261  | 0.19 | 0.1  | 0.09 | 0.09 | 0.08 | 0.18 |
| chr2 | 154959166 | 154959615 | Itch       | ENSMUSG00000027598 | 145  | 0.18 | 0.12 | 0.11 | 0.25 | 0.06 | 0.12 |
| chr2 | 30327872  | 30330224  | Ier5l      | ENSMUSG00000089762 | 671  | 0.14 | 0.14 | 0.11 | 0.14 | 0.09 | 0.16 |
| chr2 | 25356188  | 25356431  | Fbxw5      | ENSMUSG00000015095 | 39   | 0.26 | 0.12 | 0.1  | 0.25 | 0.07 | 0.13 |
| chr2 | 32462379  | 32462828  | St6galnac6 | ENSMUSG00000026811 | 122  | 0.21 | 0.04 | 0.08 | 0.07 | 0.05 | 0.13 |

|      |           |           |               |                    |      |      |      |      |      |      |      |
|------|-----------|-----------|---------------|--------------------|------|------|------|------|------|------|------|
| chr2 | 4638508   | 4639366   | Bend7         | ENSMUSG00000048186 | 60   | 0.23 | 0.14 | 0.09 | 0.11 | 0.13 | 0.08 |
| chr2 | 6050657   | 6051352   | 5430407P10Rik | ENSMUSG00000045319 | 181  | 0.22 | 0.18 | 0.1  | 0.18 | 0.1  | 0.18 |
| chr2 | 112333071 | 112333668 | Aven          | ENSMUSG00000003604 | 248  | 0.11 | 0.06 | 0.07 | 0.08 | 0.05 | 0.1  |
| chr2 | 28910253  | 28910691  | 1700101E01Rik | ENSMUSG00000079502 | 107  | 0.4  | 0.17 | 0.09 | 0.11 | 0.08 | 0.18 |
| chr2 | 122456316 | 122457477 | Spata5l1      | ENSMUSG00000074876 | 535  | 0.18 | 0.17 | 0.1  | 0.17 | 0.1  | 0.15 |
| chr2 | 118198685 | 118199870 | Gpr176        | ENSMUSG00000040133 | -122 | 0.15 | 0.09 | 0.06 | 0.06 | 0.06 | 0.11 |
| chr2 | 177853748 | 177854144 | Phactr3       | ENSMUSG00000027525 | 62   | 0.34 | 0.18 | 0.11 | 0.16 | 0.12 | 0.14 |
| chr2 | 38565798  | 38568055  | Nr5a1         | ENSMUSG00000026751 | -218 | 0.19 | 0.18 | 0.12 | 0.13 | 0.11 | 0.18 |
| chr2 | 49642960  | 49643599  | Lypd6b        | ENSMUSG00000026765 | 71   | 0.27 | 0.3  | 0.15 | 0.18 | 0.13 | 0.13 |
| chr2 | 38206487  | 38207515  | Lhx2          | ENSMUSG0000000247  | -287 | 0.16 | 0.15 | 0.09 | 0.16 | 0.08 | 0.11 |
| chr2 | 31938789  | 31940264  | Fam78a        | ENSMUSG00000050592 | -223 | 0.28 | 0.23 | 0.12 | 0.17 | 0.18 | 0.15 |
| chr2 | 73052130  | 73052689  | Ola1          | ENSMUSG00000027108 | -19  | 0.18 | 0.25 | 0.11 | 0.15 | 0.08 | 0.18 |
| chr2 | 56975799  | 56976746  | Nr4a2         | ENSMUSG00000026826 | 142  | 0.25 | 0.14 | 0.13 | 0.18 | 0.14 | 0.13 |
| chr2 | 131317394 | 131318291 | Smox          | ENSMUSG00000027333 | 342  | 0.14 | 0.19 | 0.13 | 0.17 | 0.22 | 0.16 |
| chr2 | 91864217  | 91864788  | Creb3l1       | ENSMUSG00000027230 | 157  | 0.31 | 0.42 | 0.14 | 0.28 | 0.14 | 0.2  |
| chr2 | 90419749  | 90421034  | Ptprj         | ENSMUSG00000025314 | 413  | 0.14 | 0.1  | 0.09 | 0.16 | 0.08 | 0.14 |
| chr2 | 155969617 | 155970337 | Romo1         | ENSMUSG00000067847 | 202  | 0.32 | 0.15 | 0.14 | 0.2  | 0.12 | 0.19 |
| chr2 | 152758507 | 152758764 | Foxs1         | ENSMUSG00000074676 | 309  | 0.79 | 0.82 | 0.85 | 0.9  | 0.93 | 0.93 |
| chr2 | 25187705  | 25188616  | Man1b1        | ENSMUSG00000036646 | 302  | 0.34 | 0.18 | 0.14 | 0.13 | 0.14 | 0.15 |
| chr2 | 19579166  | 19580745  | Otud1         | ENSMUSG00000043415 | 266  | 0.13 | 0.12 | 0.1  | 0.15 | 0.07 | 0.12 |
| chr2 | 27330483  | 27331737  | Brd3          | ENSMUSG00000026918 | -409 | 0.18 | 0.12 | 0.07 | 0.14 | 0.09 | 0.1  |
| chr2 | 142726873 | 142727427 | Kif16b        | ENSMUSG00000038844 | 50   | 0.07 | 0.19 | 0.1  | 0.14 | 0.19 | 0.15 |
| chr2 | 21127213  | 21127641  | Thns1         | ENSMUSG00000048550 | 76   | 0.14 | 0.14 | 0.1  | 0.09 | 0.05 | 0.15 |
| chr2 | 25079486  | 25080765  | Tubb4b        | ENSMUSG00000036752 | 49   | 0.11 | 0.64 | 0.19 | 0.31 | 0.36 | 0.22 |
| chr2 | 28060964  | 28061829  | Olfm1         | ENSMUSG00000026833 | 217  | 0.1  | 0.12 | 0.09 | 0.14 | 0.07 | 0.15 |
| chr2 | 37278087  | 37278648  | Rc3h2         | ENSMUSG00000075376 | 22   | 0.17 | 0.23 | 0.1  | 0.13 | 0.07 | 0.21 |
| chr2 | 90910234  | 90910798  | Slc39a13      | ENSMUSG00000002105 | -172 | 0.36 | 0.21 | 0.15 | 0.25 | 0.13 | 0.29 |
| chr2 | 181598894 | 181599426 | Polr3k        | ENSMUSG00000038628 | 118  | 1    | 0.33 | 0.13 | 0.17 | 0.12 | 0.21 |
| chr2 | 28695363  | 28696520  | Gtf3c4        | ENSMUSG00000035666 | -135 | 0.32 | 0.3  | 0.13 | 0.13 | 0.17 | 0.17 |
| chr2 | 30656616  | 30657310  | 1700001O22Rik | ENSMUSG00000044320 | 264  | 0.33 | 0.3  | 0.12 | 0.13 | 0.16 | 0.12 |

|      |           |           |               |                    |      |      |      |      |      |      |      |
|------|-----------|-----------|---------------|--------------------|------|------|------|------|------|------|------|
| chr2 | 131346316 | 131346544 | Smox          | ENSMUSG00000027333 | 508  | 0.8  | 0.89 | 0.89 | 0.82 | 0.97 | 0.93 |
| chr2 | 170336877 | 170337386 | Pfdn4         | ENSMUSG00000052033 | 186  | 0.34 | 0.31 | 0.18 | 0.24 | 0.2  | 0.16 |
| chr2 | 53937277  | 53938105  | Rprm          | ENSMUSG00000075334 | 272  | 0.32 | 0.12 | 0.06 | 0.17 | 0.12 | 0.2  |
| chr2 | 69723555  | 69723834  | Mettl5        | ENSMUSG00000051730 | -40  | 0.33 | 0.3  | 0.2  | 0.19 | 0.85 | 0.25 |
| chr2 | 103659569 | 103659776 | Gm13880       | ENSMUSG00000081010 | -39  | 0.93 | 0.83 | 0.86 | 0.8  | 0.85 | 0.93 |
| chr2 | 118752118 | 118752830 | Chst14        | ENSMUSG00000074916 | 241  | 0.68 | 0.72 | 0.12 | 0.14 | 0.33 | 0.22 |
| chr2 | 156005092 | 156006174 | Rbm39         | ENSMUSG00000027620 | -317 | 0.28 | 0.11 | 0.11 | 0.2  | 0.08 | 0.13 |
| chr2 | 77783891  | 77784275  | Cwc22         | ENSMUSG00000027014 | -88  | 0.7  | 0.28 | 0.1  | 0.22 | 0.27 | 0.21 |
| chr2 | 84554736  | 84555682  | Zdhc5         | ENSMUSG00000034075 | -366 | 0.14 | 0.16 | 0.13 | 0.24 | 0.05 | 0.19 |
| chr2 | 118872807 | 118873374 | Casc5         | ENSMUSG00000027326 | 235  | 0.48 | 0.1  | 0.12 | 0.08 | 0.2  | 0.15 |
| chr2 | 142888666 | 142889010 | Snrpb2        | ENSMUSG00000008333 | 63   | 0.64 | 0.27 | 0.14 | 0.25 | 0.28 | 0.16 |
| chr2 | 33497700  | 33498210  | C130021120Rik | ENSMUSG00000052951 | 1104 | 0.2  | 0.17 | 0.17 | 0.22 | 0.08 | 0.23 |
| chr2 | 157104598 | 157105402 | Rpn2          | ENSMUSG00000027642 | 247  | 0.12 | 0.17 | 0.13 | 0.12 | 0.08 | 0.13 |
| chr2 | 157249713 | 157250413 | Src           | ENSMUSG00000027646 | 211  | 0.08 | 0.08 | 0.1  | 0.11 | 0.19 | 0.12 |
| chr2 | 179776504 | 179778124 | Psmc7         | ENSMUSG00000027566 | -224 | 0.24 | 0.24 | 0.11 | 0.15 | 0.14 | 0.14 |
| chr2 | 180627489 | 180629304 | Mir124a-3     | ENSMUSG00000065454 | -340 | 0.17 | 0.22 | 0.1  | 0.19 | 0.12 | 0.14 |
| chr2 | 69560682  | 69561580  | Ppig          | ENSMUSG00000042133 | 269  | 0.13 | 0.21 | 0.1  | 0.19 | 0.21 | 0.16 |
| chr2 | 155343610 | 155344099 | Acsc2         | ENSMUSG00000027605 | 170  | 0.13 | 0.12 | 0.11 | 0.23 | 0.3  | 0.22 |
| chr2 | 74975480  | 74976211  | Gm13652       | ENSMUSG00000087333 | 10   | 0.13 | 0.06 | 0.11 | 0.18 | 0.05 | 0.13 |
| chr2 | 74535989  | 74536871  | Hoxd9         | ENSMUSG00000043342 | 693  | 0.16 | 0.17 | 0.11 | 0.11 | 0.07 | 0.1  |
| chr2 | 127161704 | 127162472 | Dusp2         | ENSMUSG00000027368 | 193  | 0.16 | 0.12 | 0.09 | 0.11 | 0.08 | 0.13 |
| chr2 | 167757493 | 167758234 | Ptpn1         | ENSMUSG00000027540 | 306  | 0.29 | 0.22 | 0.08 | 0.15 | 0.16 | 0.14 |
| chr2 | 25174246  | 25174886  | Grin1         | ENSMUSG00000026959 | 49   | 0.48 | 0.46 | 0.12 | 0.18 | 0.11 | 0.23 |
| chr2 | 153458274 | 153458555 | Commd7        | ENSMUSG00000056941 | 43   | 0.57 | 0.16 | 0.11 | 0.14 | 0.15 | 0.22 |
| chr2 | 163744197 | 163744942 | Rims4         | ENSMUSG00000035226 | -150 | 0.35 | 0.26 | 0.1  | 0.2  | 0.19 | 0.13 |
| chr2 | 39081239  | 39082012  | Ppp6c         | ENSMUSG00000026753 | 346  | 0.13 | 0.27 | 0.14 | 0.14 | 0.06 | 0.24 |
| chr2 | 58998722  | 59000123  | Ccdc148       | ENSMUSG00000036641 | -682 | 0.14 | 0.12 | 0.1  | 0.1  | 0.08 | 0.11 |
| chr2 | 84680127  | 84680869  | Slc43a1       | ENSMUSG00000027075 | 142  | 0.66 | 0.25 | 0.15 | 0.31 | 0.36 | 0.21 |
| chr2 | 152157898 | 152158214 | Rbck1         | ENSMUSG00000027466 | 64   | 0.4  | 0.68 | 0.23 | 0.16 | 0.22 | 0.19 |
| chr2 | 179838025 | 179839485 | Hrh3          | ENSMUSG00000039059 | -715 | 0.17 | 0.2  | 0.11 | 0.13 | 0.11 | 0.14 |

|      |           |           |         |                    |      |      |      |      |      |      |      |
|------|-----------|-----------|---------|--------------------|------|------|------|------|------|------|------|
| chr2 | 90687183  | 90687732  | Mtch2   | ENSMUSG00000027282 | 145  | 0.35 | 0.32 | 0.11 | 0.16 | 0.26 | 0.16 |
| chr2 | 25471623  | 25472145  | Gm13520 | ENSMUSG00000052403 | 357  | 0.07 | 0.38 | 0.13 | 0.23 | 0.22 | 0.17 |
| chr2 | 28302037  | 28302918  | Ppp1r26 | ENSMUSG00000035829 | 157  | 0.19 | 0.13 | 0.1  | 0.13 | 0.11 | 0.13 |
| chr2 | 163028661 | 163030393 | Tox2    | ENSMUSG00000074607 | 666  | 0.29 | 0.21 | 0.12 | 0.13 | 0.16 | 0.15 |
| chr2 | 164229897 | 164230451 | Matn4   | ENSMUSG00000016995 | -62  | 1    | 0.63 | 0.06 | 0.2  | 0.3  | 0.17 |
| chr2 | 179991701 | 179992554 | Rps21   | ENSMUSG00000039001 | 45   | 0.38 | 0.5  | 0.09 | 0.19 | 0.13 | 0.23 |
| chr2 | 167456856 | 167457833 | Ube2v1  | ENSMUSG00000078923 | 123  | 0.24 | 0.19 | 0.1  | 0.16 | 0.14 | 0.14 |
| chr2 | 74542784  | 74544061  | Hoxd8   | ENSMUSG00000027102 | 460  | 0.18 | 0.18 | 0.14 | 0.11 | 0.1  | 0.13 |
| chr2 | 109517329 | 109517794 | Bdnf    | ENSMUSG00000048482 | 372  | 0.5  | 1    | 0.18 | 0.17 | 0.16 | 0.14 |
| chr2 | 166731415 | 166732129 | Cse1l   | ENSMUSG00000002718 | 232  | 0.21 | 0.09 | 0.09 | 0.14 | 0.1  | 0.16 |
| chr2 | 168566881 | 168567245 | Atp9a   | ENSMUSG00000027546 | 237  | 0.41 | 0.26 | 0.11 | 0.15 | 0.14 | 0.1  |
| chr2 | 119372652 | 119372891 | Exd1    | ENSMUSG00000048647 | 159  | 0.27 | 0.17 | 0.11 | 0.18 | 0.12 | 0.18 |
| chr2 | 133377699 | 133379221 | Bmp2    | ENSMUSG00000027358 | 565  | 0.2  | 0.17 | 0.13 | 0.17 | 0.14 | 0.12 |
| chr2 | 156665597 | 156667029 | Gm14230 | ENSMUSG00000087179 | -685 | 0.23 | 0.15 | 0.09 | 0.18 | 0.12 | 0.14 |
| chr2 | 163896141 | 163896759 | Tomm34  | ENSMUSG00000018322 | 388  | 0.15 | 0.15 | 0.13 | 0.25 | 0.08 | 0.18 |
| chr2 | 120556554 | 120557414 | Cdan1   | ENSMUSG00000027284 | 242  | 0.39 | 0.33 | 0.11 | 0.15 | 0.11 | 0.09 |
| chr2 | 24617586  | 24618992  | Cacna1b | ENSMUSG00000004113 | 278  | 0.17 | 0.14 | 0.15 | 0.24 | 0.28 | 0.14 |
| chr2 | 65962044  | 65963174  | Gaint3  | ENSMUSG00000026994 | 442  | 0.3  | 0.23 | 0.12 | 0.17 | 0.21 | 0.11 |
| chr2 | 68308924  | 68310554  | Stk39   | ENSMUSG00000027030 | 258  | 0.23 | 0.16 | 0.2  | 0.15 | 0.13 | 0.15 |
| chr2 | 14976560  | 14977335  | Arl5b   | ENSMUSG00000017418 | 38   | 0.23 | 0.27 | 0.08 | 0.11 | 0.08 | 0.1  |
| chr2 | 104656271 | 104657395 | Qser1   | ENSMUSG00000074994 | 20   | 0.14 | 0.24 | 0.11 | 0.12 | 0.32 | 0.13 |
| chr2 | 71624814  | 71625912  | Itga6   | ENSMUSG00000027111 | 377  | 0.33 | 0.26 | 0.09 | 0.15 | 0.28 | 0.18 |
| chr2 | 72314116  | 72315218  | Cdca7   | ENSMUSG00000055612 | 451  | 0.16 | 0.3  | 0.2  | 0.24 | 0.29 | 0.21 |
| chr2 | 150612360 | 150612965 | Pygb    | ENSMUSG00000033059 | 191  | 0.56 | 1    | 0.11 | 0.15 | 0.17 | 0.11 |
| chr2 | 153566877 | 153567376 | Mapre1  | ENSMUSG00000027479 | 116  | 0.4  | 0.42 | 0.16 | 0.31 | 0.25 | 0.27 |
| chr2 | 164786281 | 164786497 | Gm11459 | ENSMUSG00000087503 | 87   | 0.15 | 0.24 | 0.1  | 0.12 | 0.07 | 0.11 |
| chr2 | 168591251 | 168592631 | Gm14261 | ENSMUSG00000085322 | 298  | 0.14 | 0.16 | 0.14 | 0.16 | 0.1  | 0.14 |
| chr2 | 24804936  | 24805929  | Zmynd19 | ENSMUSG00000026974 | 120  | 0.22 | 0.2  | 0.11 | 0.15 | 0.16 | 0.15 |
| chr2 | 27370563  | 27371136  | Wdr5    | ENSMUSG00000026917 | 172  | 0.13 | 0.07 | 0.09 | 0.11 | 0.05 | 0.09 |
| chr2 | 9969535   | 9970389   | Taf3    | ENSMUSG00000025782 | 261  | 0.2  | 0.11 | 0.09 | 0.14 | 0.1  | 0.18 |

|      |           |           |               |                     |      |      |      |      |      |      |      |
|------|-----------|-----------|---------------|---------------------|------|------|------|------|------|------|------|
| chr2 | 150574732 | 150575205 | Entpd6        | ENSMUSG00000033068  | 190  | 0.18 | 0.18 | 0.08 | 0.15 | 0.08 | 0.09 |
| chr2 | 151968949 | 151969910 | Tcf15         | ENSMUSG00000068079  | 132  | 0.17 | 0.21 | 0.1  | 0.19 | 0.41 | 0.12 |
| chr2 | 126532872 | 126533394 | Usp8          | ENSMUSG00000027363  | 69   | 0.13 | 0.29 | 0.17 | 0.19 | 0.22 | 0.19 |
| chr2 | 173562845 | 173563463 | Vapb          | ENSMUSG00000054455  | 142  | 0.17 | 0.22 | 0.08 | 0.13 | 0.35 | 0.13 |
| chr2 | 163679405 | 163679837 | Kcnk15        | ENSMUSG00000035238  | 152  | 0.1  | 0.21 | 0.08 | 0.16 | 0.17 | 0.15 |
| chr2 | 165329361 | 165329648 | Slc2a10       | ENSMUSG00000027661  | 217  | 0.35 | 0.12 | 0.11 | 0.26 | 0.11 | 0.18 |
| chr2 | 168106159 | 168106623 | Kcng1         | ENSMUSG000000074575 | 241  | 0.19 | 0.12 | 0.11 | 0.19 | 0.13 | 0.15 |
| chr2 | 25995174  | 25996321  | C330006A16Rik | ENSMUSG000000087679 | 294  | 0.34 | 0.23 | 0.12 | 0.15 | 0.23 | 0.13 |
| chr2 | 32817109  | 32817677  | Lrsam1        | ENSMUSG00000026792  | -281 | 0.5  | 0.13 | 0.1  | 0.15 | 0.13 | 0.16 |
| chr2 | 38920902  | 38921305  | Golga1        | ENSMUSG00000026754  | -98  | 0.33 | 0.36 | 0.14 | 0.13 | 0.2  | 0.13 |
| chr2 | 49474721  | 49475547  | Kif5c         | ENSMUSG00000026764  | 316  | 0.22 | 0.17 | 0.07 | 0.15 | 0.07 | 0.13 |
| chr2 | 77654403  | 77655294  | Zfp385b       | ENSMUSG00000027016  | 25   | 0.31 | 0.2  | 0.16 | 0.17 | 0.18 | 0.18 |
| chr2 | 18919071  | 18920261  | Pip4k2a       | ENSMUSG00000026737  | 87   | 0.21 | 0.21 | 0.11 | 0.17 | 0.13 | 0.17 |
| chr2 | 92241119  | 92241440  | Mapk8ip1      | ENSMUSG00000027223  | 141  | 0.24 | 0.11 | 0.08 | 0.16 | 0.12 | 0.14 |
| chr2 | 28438250  | 28438851  | Gtf3c5        | ENSMUSG00000026816  | -42  | 0.15 | 0.05 | 0.08 | 0.14 | 0.07 | 0.11 |
| chr2 | 35516681  | 35517687  | Dab2ip        | ENSMUSG00000026883  | 314  | 0.11 | 0.13 | 0.09 | 0.14 | 0.07 | 0.16 |
| chr2 | 119583788 | 119584733 | Ltk           | ENSMUSG00000027297  | -5   | 0.14 | 0.17 | 0.1  | 0.12 | 0.08 | 0.11 |
| chr2 | 73224384  | 73224965  | Gpr155        | ENSMUSG00000041762  | -219 | 0.67 | 0.1  | 0.14 | 0.13 | 0.12 | 0.13 |
| chr2 | 163427996 | 163428317 | Ttpal         | ENSMUSG00000017679  | 106  | 0.22 | 0.25 | 0.14 | 0.2  | 0.11 | 0.17 |
| chr2 | 140220917 | 140221818 | Macrod2       | ENSMUSG00000068205  | 322  | 0.09 | 0.09 | 0.08 | 0.12 | 0.06 | 0.07 |
| chr2 | 164630133 | 164630474 | Acot8         | ENSMUSG00000017307  | 19   | 0.43 | 0.12 | 0.13 | 0.31 | 0.12 | 0.19 |
| chr2 | 26865378  | 26865796  | 5930434B04Rik | ENSMUSG00000015488  | 141  | 0.38 | 0.32 | 0.13 | 0.18 | 0.12 | 0.19 |
| chr2 | 37286181  | 37286659  | Zbtb6         | ENSMUSG00000066798  | 19   | 0.26 | 0.15 | 0.13 | 0.19 | 0.13 | 0.15 |
| chr2 | 60719016  | 60719825  | Rbms1         | ENSMUSG00000026970  | 75   | 0.15 | 0.16 | 0.12 | 0.12 | 0.09 | 0.14 |
| chr2 | 63022141  | 63022358  | Kcnh7         | ENSMUSG00000059742  | -22  | 0.09 | 0.06 | 0.13 | 0.11 | 0.05 | 0.13 |
| chr2 | 72816999  | 72819013  | Sp3           | ENSMUSG00000027109  | -958 | 0.06 | 0.1  | 0.08 | 0.12 | 0.09 | 0.12 |
| chr2 | 49306532  | 49308263  | Epc2          | ENSMUSG00000069495  | 391  | 0.24 | 0.2  | 0.13 | 0.17 | 0.15 | 0.17 |
| chr2 | 124435576 | 124436666 | Sema6d        | ENSMUSG00000027200  | 279  | 0.21 | 0.11 | 0.1  | 0.12 | 0.11 | 0.14 |
| chr2 | 156832496 | 156832923 | Dsn1          | ENSMUSG00000027635  | 57   | 0.42 | 0.27 | 0.22 | 0.19 | 0.21 | 0.21 |
| chr2 | 180436252 | 180436901 | Dido1         | ENSMUSG00000038914  | 121  | 0.21 | 0.21 | 0.14 | 0.17 | 0.41 | 0.18 |

|      |           |           |               |                    |       |      |      |      |      |      |      |
|------|-----------|-----------|---------------|--------------------|-------|------|------|------|------|------|------|
| chr2 | 112219250 | 112219696 | 2410042D21Rik | ENSMUSG00000027132 | 105   | 0.12 | 0.11 | 0.09 | 0.16 | 0.06 | 0.12 |
| chr2 | 32390552  | 32391453  | Fam102a       | ENSMUSG00000039157 | 150   | 0.21 | 0.22 | 0.13 | 0.12 | 0.11 | 0.13 |
| chr2 | 155062204 | 155062642 | Dynlrb1       | ENSMUSG00000047459 | 154   | 0.14 | 0.21 | 0.1  | 0.18 | 0.22 | 0.18 |
| chr2 | 35437038  | 35438564  | Dab2ip        | ENSMUSG00000026883 | -559  | 0.15 | 0.12 | 0.1  | 0.15 | 0.1  | 0.16 |
| chr2 | 33286292  | 33287141  | Zbtb34        | ENSMUSG00000068966 | 121   | 0.22 | 0.13 | 0.08 | 0.16 | 0.13 | 0.1  |
| chr2 | 9802719   | 9803061   | 4930412O13Rik | ENSMUSG00000025783 | 11    | 0.1  | 0.08 | 0.15 | 0.15 | 0.19 | 0.17 |
| chr2 | 164682331 | 164683249 | Pltp          | ENSMUSG00000017754 | 252   | 0.11 | 0.16 | 0.12 | 0.22 | 0.24 | 0.11 |
| chr2 | 23011309  | 23011630  | Mastl         | ENSMUSG00000026779 | -52   | 0.06 | 0.09 | 0.06 | 0.09 | 0.12 | 0.11 |
| chr2 | 74584428  | 74585348  | Hoxd3         | ENSMUSG00000079277 | 1157  | 0.2  | 0.12 | 0.2  | 0.16 | 0.1  | 0.18 |
| chr2 | 31701209  | 31702446  | Fibcd1        | ENSMUSG00000026841 | -302  | 0.16 | 0.19 | 0.12 | 0.11 | 0.09 | 0.15 |
| chr2 | 92854853  | 92855422  | Prdm11        | ENSMUSG00000075028 | -1070 | 0.21 | 0.12 | 0.13 | 0.13 | 0.13 | 0.13 |
| chr2 | 113688654 | 113688903 | Arhgap11a     | ENSMUSG00000041219 | -6    | 0.27 | 0.22 | 0.11 | 0.24 | 0.08 | 0.31 |
| chr2 | 54288428  | 54289370  | Galnt13       | ENSMUSG00000060988 | 171   | 0.14 | 0.15 | 0.09 | 0.12 | 0.1  | 0.16 |
| chr2 | 74590945  | 74591459  | Gm14424       | ENSMUSG00000085015 | 461   | 0.47 | 0.63 | 0.18 | 0.29 | 0.29 | 0.16 |
| chr2 | 167514052 | 167515684 | Cebpb         | ENSMUSG00000056501 | 453   | 0.17 | 0.11 | 0.09 | 0.12 | 0.12 | 0.13 |
| chr2 | 30026933  | 30027655  | Endog         | ENSMUSG00000015337 | 281   | 0.18 | 0.24 | 0.23 | 0.15 | 0.28 | 0.14 |
| chr2 | 71366965  | 71367783  | Dlx1          | ENSMUSG00000041911 | 216   | 0.24 | 0.22 | 0.09 | 0.17 | 0.11 | 0.13 |
| chr2 | 132704983 | 132705494 | Lrrn4         | ENSMUSG00000043110 | 1389  | 0.36 | 0.09 | 0.09 | 0.1  | 0.16 | 0.1  |
| chr2 | 70347242  | 70347545  | Gm16292       | ENSMUSG00000086515 | -137  | 0.18 | 0.14 | 0.07 | 0.13 | 0.07 | 0.16 |
| chr2 | 113597745 | 113598044 | Grem1         | ENSMUSG00000074934 | 909   | 0.08 | 0.25 | 0.09 | 0.33 | 0.22 | 0.13 |
| chr2 | 119151637 | 119153129 | Gm14207       | ENSMUSG00000074912 | -453  | 0.22 | 0.14 | 0.11 | 0.2  | 0.12 | 0.14 |
| chr2 | 119500669 | 119501364 | Rtf1          | ENSMUSG00000027304 | 212   | 0.21 | 0.16 | 0.09 | 0.14 | 0.1  | 0.12 |
| chr2 | 180323931 | 180324494 | Ogfr          | ENSMUSG00000049401 | 262   | 1    | 0.22 | 0.13 | 0.34 | 0.4  | 0.15 |
| chr2 | 9796268   | 9796583   | Gata3         | ENSMUSG00000015619 | 601   | 0.55 | 0.69 | 0.48 | 0.56 | 0.23 | 0.35 |
| chr2 | 32702510  | 32702941  | Stxbp1        | ENSMUSG00000026797 | -41   | 0.16 | 0.07 | 0.06 | 0.15 | 0.04 | 0.17 |
| chr2 | 36066356  | 36066592  | Gm13429       | ENSMUSG00000085141 | 182   | 0.67 | 0.17 | 0.13 | 0.15 | 0.24 | 0.22 |
| chr2 | 109730742 | 109731425 | Lin7c         | ENSMUSG00000027162 | 73    | 0.35 | 0.48 | 0.13 | 0.18 | 0.21 | 0.15 |
| chr2 | 181333448 | 181333991 | Samd10        | ENSMUSG00000038605 | 184   | 0.32 | 0.17 | 0.11 | 0.13 | 0.16 | 0.12 |
| chr2 | 51928258  | 51929180  | Rif1          | ENSMUSG00000036202 | 362   | 0.32 | 0.25 | 0.1  | 0.16 | 0.21 | 0.19 |
| chr2 | 179176980 | 179178463 | Cdh4          | ENSMUSG00000000305 | 585   | 0.15 | 0.19 | 0.1  | 0.18 | 0.11 | 0.13 |

|      |           |           |               |                    |      |      |      |      |      |      |      |
|------|-----------|-----------|---------------|--------------------|------|------|------|------|------|------|------|
| chr2 | 157562989 | 157563339 | Ctnnb1        | ENSMUSG00000027649 | 27   | 0.17 | 0.08 | 0.11 | 0.16 | 0.05 | 0.19 |
| chr2 | 128955133 | 128955584 | Chchd5        | ENSMUSG00000037938 | -78  | 0.33 | 0.33 | 0.15 | 0.15 | 0.19 | 0.2  |
| chr2 | 152512545 | 152512966 | Mcts2         | ENSMUSG00000042814 | -129 | 0.62 | 0.56 | 0.38 | 0.56 | 0.49 | 0.32 |
| chr2 | 127951361 | 127954049 | Bcl2l11       | ENSMUSG00000027381 | 931  | 0.12 | 0.13 | 0.13 | 0.12 | 0.09 | 0.14 |
| chr2 | 139502984 | 139504596 | Gm14066       | ENSMUSG00000085071 | -340 | 0.28 | 0.2  | 0.12 | 0.12 | 0.17 | 0.14 |
| chr2 | 25280997  | 25281315  | Fut7          | ENSMUSG00000036587 | 988  | 0.35 | 0.81 | 0.43 | 0.24 | 0.62 | 0.75 |
| chr2 | 130732003 | 130732712 | A730017L22Rik | ENSMUSG00000085566 | -265 | 0.06 | 0.23 | 0.08 | 0.17 | 0.1  | 0.13 |
| chr2 | 74663813  | 74664418  | Mtx2          | ENSMUSG00000027099 | 255  | 1    | 0.75 | 0.41 | 0.22 | 0.11 | 0.21 |
| chr2 | 24909900  | 24910225  | Nelf          | ENSMUSG00000006476 | 158  | 0.43 | 0.18 | 0.07 | 0.21 | 0.11 | 0.15 |
| chr2 | 37558167  | 37559404  | Strbp         | ENSMUSG00000026915 | -116 | 0.13 | 0.19 | 0.1  | 0.12 | 0.18 | 0.13 |
| chr2 | 92299719  | 92300028  | Slc35c1       | ENSMUSG00000049922 | -7   | 0.28 | 0.12 | 0.16 | 0.29 | 0.17 | 0.15 |
| chr2 | 172825442 | 172826233 | Rae1          | ENSMUSG00000027509 | 219  | 0.13 | 0.26 | 0.1  | 0.1  | 0.24 | 0.1  |
| chr2 | 152857641 | 152858282 | Xkr7          | ENSMUSG00000042631 | 373  | 0.39 | 0.15 | 0.1  | 0.14 | 0.2  | 0.25 |
| chr2 | 83484468  | 83484976  | Zc3h15        | ENSMUSG00000027091 | 130  | 0.09 | 0.34 | 0.09 | 0.14 | 0.15 | 0.12 |
| chr2 | 26300402  | 26301491  | Sec16a        | ENSMUSG00000026924 | -226 | 0.17 | 0.23 | 0.11 | 0.17 | 0.1  | 0.11 |
| chr2 | 27395740  | 27396040  | Gm13421       | ENSMUSG00000085929 | -56  | 0.09 | 0.23 | 0.1  | 0.18 | 0.28 | 0.14 |
| chr2 | 79296775  | 79297179  | Neurod1       | ENSMUSG00000034701 | -69  | 0.25 | 0.09 | 0.17 | 0.24 | 0.09 | 0.15 |
| chr2 | 118423882 | 118424263 | Bub1b         | ENSMUSG00000040084 | 125  | 0.4  | 0.09 | 0.17 | 0.17 | 0.08 | 0.08 |
| chr2 | 160471404 | 160472687 | Top1          | ENSMUSG00000070544 | 421  | 0.17 | 0.11 | 0.12 | 0.15 | 0.12 | 0.14 |
| chr2 | 179711206 | 179711942 | Taf4a         | ENSMUSG00000039117 | -223 | 0.26 | 0.23 | 0.11 | 0.17 | 0.1  | 0.16 |
| chr2 | 179906042 | 179906786 | Adrm1         | ENSMUSG00000039041 | 224  | 0.13 | 0.08 | 0.13 | 0.1  | 0.08 | 0.11 |
| chr2 | 26883337  | 26883709  | Slc2a6        | ENSMUSG00000036067 | -94  | 1    | 0.12 | 0.09 | 0.13 | 0.07 | 0.25 |
| chr2 | 74495755  | 74496098  | Evx2          | ENSMUSG0000001815  | 1550 | 0.27 | 0.12 | 0.14 | 0.13 | 0.16 | 0.11 |
| chr2 | 179853886 | 179854611 | Osbpl2        | ENSMUSG00000039050 | 237  | 0.27 | 0.23 | 0.08 | 0.14 | 0.15 | 0.13 |
| chr2 | 38142372  | 38143013  | Dennd1a       | ENSMUSG00000035392 | 16   | 0.25 | 0.35 | 0.1  | 0.15 | 0.35 | 0.15 |
| chr2 | 92885545  | 92886604  | Prdm11        | ENSMUSG00000075028 | -346 | 0.22 | 0.19 | 0.09 | 0.1  | 0.16 | 0.12 |
| chr2 | 118304894 | 118305576 | Srp14         | ENSMUSG00000009549 | 136  | 0.22 | 0.06 | 0.1  | 0.14 | 0.05 | 0.11 |
| chr2 | 151907379 | 151908104 | Scrt2         | ENSMUSG00000060257 | 476  | 0.07 | 0.21 | 0.12 | 0.14 | 0.2  | 0.12 |
| chr2 | 169955946 | 169957022 | Zfp217        | ENSMUSG00000052056 | 236  | 0.31 | 0.17 | 0.14 | 0.23 | 0.21 | 0.19 |
| chr2 | 173901649 | 173902417 | Stx16         | ENSMUSG00000027522 | 224  | 0.27 | 0.12 | 0.11 | 0.2  | 0.1  | 0.11 |

|      |           |           |               |                     |      |      |      |      |      |      |      |
|------|-----------|-----------|---------------|---------------------|------|------|------|------|------|------|------|
| chr2 | 174289352 | 174289797 | Atp5e         | ENSMUSG00000016252  | -24  | 0.31 | 0.22 | 0.07 | 0.12 | 0.24 | 0.09 |
| chr2 | 27741683  | 27742672  | Col5a1        | ENSMUSG00000026837  | 232  | 0.17 | 0.26 | 0.11 | 0.17 | 0.1  | 0.14 |
| chr2 | 30532562  | 30532896  | Gm14486       | ENSMUSG000000087268 | 802  | 0.04 | 0.07 | 0.07 | 0.13 | 0.08 | 0.14 |
| chr2 | 30996470  | 30997948  | Fnbp1         | ENSMUSG000000075415 | 113  | 0.15 | 0.15 | 0.11 | 0.15 | 0.11 | 0.16 |
| chr2 | 34964855  | 34965253  | Cep110        | ENSMUSG000000057110 | 42   | 0.23 | 0.21 | 0.14 | 0.16 | 0.13 | 0.2  |
| chr2 | 118982152 | 118982924 | Fam82a2       | ENSMUSG000000070730 | 22   | 0.14 | 0.19 | 0.08 | 0.16 | 0.1  | 0.13 |
| chr2 | 125499095 | 125499378 | Shc4          | ENSMUSG000000035109 | 2    | 0.5  | 0.15 | 0.07 | 0.1  | 0.1  | 0.16 |
| chr2 | 162880260 | 162881075 | Mybl2         | ENSMUSG00000017861  | 244  | 0.38 | 0.41 | 0.17 | 0.28 | 0.27 | 0.24 |
| chr2 | 26320968  | 26321174  | Notch1        | ENSMUSG000000026923 | 612  | 0.63 | 0.62 | 0.86 | 0.85 | 0.83 | 0.91 |
| chr2 | 26765937  | 26766750  | Med22         | ENSMUSG00000015776  | -254 | 0.36 | 0.14 | 0.14 | 0.2  | 0.19 | 0.15 |
| chr2 | 39045723  | 39046522  | Scai          | ENSMUSG000000035236 | 126  | 0.37 | 0.39 | 0.26 | 0.2  | 0.19 | 0.18 |
| chr2 | 60221130  | 60221438  | Ly75          | ENSMUSG000000026980 | 25   | 0.13 | 0.32 | 0.08 | 0.16 | 0.07 | 0.11 |
| chr2 | 71710974  | 71711882  | Pdk1          | ENSMUSG000000006494 | 147  | 0.12 | 0.42 | 0.12 | 0.18 | 0.23 | 0.26 |
| chr2 | 87366164  | 87366377  | Gm13736       | ENSMUSG000000082908 | -31  | 1    | 0.08 | 0.15 | 0.57 | 0.07 | 0.29 |
| chr2 | 118726955 | 118728699 | Bahd1         | ENSMUSG000000040007 | 638  | 0.13 | 0.14 | 0.11 | 0.11 | 0.1  | 0.11 |
| chr2 | 119979833 | 119980585 | Ehd4          | ENSMUSG000000027293 | -11  | 0.25 | 0.2  | 0.14 | 0.25 | 0.11 | 0.22 |
| chr2 | 125450581 | 125451031 | Cep152        | ENSMUSG000000068394 | 43   | 0.2  | 0.19 | 0.09 | 0.17 | 0.13 | 0.12 |
| chr2 | 128512660 | 128513235 | Anapc1        | ENSMUSG000000014355 | 143  | 0.2  | 0.12 | 0.13 | 0.19 | 0.13 | 0.18 |
| chr2 | 152776994 | 152777534 | Dusp15        | ENSMUSG000000042662 | -123 | 0.23 | 0.2  | 0.08 | 0.12 | 0.12 | 0.12 |
| chr2 | 157740059 | 157740984 | Vstm2l        | ENSMUSG000000037843 | 132  | 0.12 | 0.19 | 0.12 | 0.17 | 0.21 | 0.14 |
| chr2 | 172170829 | 172171400 | 2010011I20Rik | ENSMUSG000000027495 | 49   | 0.4  | 0.32 | 0.12 | 0.18 | 0.18 | 0.19 |
| chr2 | 180891410 | 180891763 | Eef1a2        | ENSMUSG000000016349 | -98  | 0.12 | 0.11 | 0.08 | 0.13 | 0.06 | 0.08 |
| chr2 | 18620283  | 18620853  | BC061194      | ENSMUSG000000037708 | -60  | 0.23 | 0.09 | 0.13 | 0.16 | 0.13 | 0.22 |
| chr2 | 29202296  | 29202700  | Med27         | ENSMUSG000000026799 | 159  | 0.06 | 0.26 | 0.12 | 0.17 | 0.13 | 0.16 |
| chr2 | 76207968  | 76208409  | Rbm45         | ENSMUSG000000042369 | 147  | 0.16 | 0.19 | 0.1  | 0.18 | 0.11 | 0.16 |
| chr2 | 91803335  | 91803965  | Dgkz          | ENSMUSG000000040479 | 164  | 0.11 | 0.12 | 0.09 | 0.14 | 0.08 | 0.14 |
| chr2 | 104689431 | 104690084 | Prrg4         | ENSMUSG000000027171 | -107 | 0.3  | 0.14 | 0.12 | 0.18 | 0.09 | 0.11 |
| chr2 | 119625061 | 119625776 | Tyro3         | ENSMUSG000000027298 | 355  | 0.12 | 0.09 | 0.11 | 0.16 | 0.08 | 0.15 |
| chr2 | 120996204 | 120997372 | Tubgcp4       | ENSMUSG000000027263 | 398  | 0.11 | 0.16 | 0.11 | 0.14 | 0.08 | 0.13 |
| chr2 | 148498317 | 148498611 | Nxt1          | ENSMUSG000000036992 | 127  | 0.11 | 0.19 | 0.15 | 0.1  | 0.07 | 0.17 |



|      |           |           |            |                     |      |      |      |      |      |      |      |
|------|-----------|-----------|------------|---------------------|------|------|------|------|------|------|------|
| chr2 | 152934172 | 152934657 | Hck        | ENSMUSG00000003283  | 210  | 0.13 | 0.12 | 0.07 | 0.08 | 0.06 | 0.12 |
| chr2 | 160737385 | 160738284 | Emilin3    | ENSMUSG000000050700 | 219  | 0.15 | 0.12 | 0.12 | 0.15 | 0.09 | 0.18 |
| chr2 | 173403564 | 173403939 | Ankrd60    | ENSMUSG000000027517 | -52  | 1    | 1    | 0.24 | NA   | 0.48 | NA   |
| chr2 | 26092508  | 26093101  | Qsox2      | ENSMUSG000000036327 | 104  | 0.25 | 0.22 | 0.12 | 0.14 | 0.13 | 0.3  |
| chr2 | 92440070  | 92440657  | Chst1      | ENSMUSG000000027221 | 499  | 0.15 | 0.13 | 0.07 | 0.13 | 0.09 | 0.15 |
| chr2 | 127188651 | 127189366 | Adra2b     | ENSMUSG000000058620 | 64   | 0.12 | 0.1  | 0.11 | 0.14 | 0.06 | 0.18 |
| chr2 | 131970252 | 131970835 | Gm14051    | ENSMUSG000000086756 | 274  | 0.46 | 0.33 | 0.13 | 0.15 | 0.35 | 0.13 |
| chr2 | 23364192  | 23364393  | Gm13331    | ENSMUSG000000081519 | -88  | 0.88 | 0.9  | 0.92 | 0.87 | 0.95 | 0.95 |
| chr2 | 32985723  | 32986117  | Garnl3     | ENSMUSG000000038860 | 208  | 0.23 | 0.28 | 0.12 | 0.13 | 0.08 | 0.12 |
| chr2 | 77118176  | 77118971  | Sestd1     | ENSMUSG000000042272 | 73   | 0.23 | 0.18 | 0.08 | 0.11 | 0.16 | 0.14 |
| chr2 | 121781535 | 121782508 | Ctdsp2     | ENSMUSG000000033411 | 284  | 0.19 | 0.2  | 0.11 | 0.16 | 0.11 | 0.16 |
| chr2 | 121853884 | 121855046 | Eif3j      | ENSMUSG000000027236 | 183  | 0.28 | 0.2  | 0.12 | 0.17 | 0.19 | 0.14 |
| chr2 | 148220788 | 148221681 | Sstr4      | ENSMUSG000000037014 | 121  | 0.17 | 0.12 | 0.11 | 0.08 | 0.09 | 0.15 |
| chr2 | 31543703  | 31544619  | Abl1       | ENSMUSG000000026842 | 265  | 0.44 | 0.17 | 0.13 | 0.14 | 0.27 | 0.13 |
| chr2 | 69043915  | 69044352  | Spc25      | ENSMUSG000000005233 | 47   | 0.22 | 0.1  | 0.08 | 0.14 | 0.06 | 0.17 |
| chr2 | 91105154  | 91105747  | Arfgap2    | ENSMUSG000000027255 | 0    | 0.11 | 0.1  | 0.1  | 0.13 | 0.07 | 0.12 |
| chr2 | 129418931 | 129419414 | Sirpa      | ENSMUSG000000037902 | 231  | 0.17 | 0.67 | 0.1  | 0.06 | 0.06 | 0.18 |
| chr2 | 168737694 | 168738043 | Zfp64      | ENSMUSG000000027551 | 265  | 0.33 | 0.08 | 0.14 | 0.16 | 0.22 | 0.22 |
| chr2 | 31615307  | 31615551  | Abl1       | ENSMUSG000000026842 | -34  | 0.5  | 0.45 | 0.09 | 0.11 | 0.26 | 0.11 |
| chr2 | 32596948  | 32597353  | Sh2d3c     | ENSMUSG000000059013 | 140  | 0.11 | 0.12 | 0.07 | 0.13 | 0.23 | 0.11 |
| chr2 | 34769283  | 34769559  | Phf19      | ENSMUSG000000026873 | 75   | 0.07 | 0.12 | 0.07 | 0.12 | 0.04 | 0.07 |
| chr2 | 73110910  | 73112972  | Sp9        | ENSMUSG000000068859 | 1918 | 0.15 | 0.19 | 0.09 | 0.17 | 0.12 | 0.13 |
| chr2 | 84726470  | 84727892  | Rtn4rl2    | ENSMUSG000000050896 | -548 | 0.1  | 0.13 | 0.09 | 0.14 | 0.16 | 0.16 |
| chr2 | 155340371 | 155340679 | Ggt7       | ENSMUSG000000027603 | 59   | 1    | 0.06 | 0.12 | 0.1  | 0.09 | 0.12 |
| chr2 | 75496745  | 75498088  | AL772404.1 | ENSMUSG000000093242 | 115  | 0.16 | 0.14 | 0.13 | 0.17 | 0.11 | 0.12 |
| chr2 | 19366963  | 19368271  | Ptf1a      | ENSMUSG000000026735 | 327  | 0.23 | 0.16 | 0.12 | 0.18 | 0.15 | 0.13 |
| chr2 | 29643750  | 29644127  | Coq4       | ENSMUSG000000026798 | 159  | 0.15 | 0.22 | 0.13 | 0.26 | 0.34 | 0.28 |
| chr2 | 181254919 | 181255681 | Dnajc5     | ENSMUSG000000000826 | 110  | 0.14 | 0.21 | 0.1  | 0.14 | 0.09 | 0.12 |
| chr2 | 18615782  | 18616432  | Gm13334    | ENSMUSG000000087182 | 428  | 0.14 | 0.34 | 0.11 | 0.21 | 0.28 | 0.13 |
| chr2 | 35477362  | 35477859  | Dab2ip     | ENSMUSG000000026883 | 109  | 0.23 | 0.1  | 0.13 | 0.23 | 0.14 | 0.21 |

|      |           |           |               |                    |      |      |      |      |      |      |      |
|------|-----------|-----------|---------------|--------------------|------|------|------|------|------|------|------|
| chr2 | 79294075  | 79294643  | Gm17325       | ENSMUSG00000090313 | 217  | 0.2  | 0.07 | 0.11 | 0.15 | 0.11 | 0.12 |
| chr2 | 115887971 | 115888174 | Meis2         | ENSMUSG00000027210 | 24   | 0.43 | 0.38 | 0.13 | 0.34 | 0.16 | 0.17 |
| chr2 | 162756704 | 162758107 | Srsf6         | ENSMUSG00000016921 | 141  | 0.15 | 0.23 | 0.11 | 0.1  | 0.1  | 0.15 |
| chr2 | 165058932 | 165060592 | Cdh22         | ENSMUSG00000053166 | 591  | 0.13 | 0.13 | 0.09 | 0.11 | 0.16 | 0.13 |
| chr2 | 69423377  | 69424547  | Lrp2          | ENSMUSG00000027070 | 124  | 0.23 | 0.13 | 0.1  | 0.15 | 0.18 | 0.18 |
| chr2 | 94246263  | 94246973  | 2810002D19Rik | ENSMUSG00000045464 | 310  | 0.29 | 0.08 | 0.13 | 0.16 | 0.22 | 0.17 |
| chr2 | 153116963 | 153117423 | Kif3b         | ENSMUSG00000027475 | 44   | 0.13 | 0.16 | 0.09 | 0.13 | 0.1  | 0.11 |
| chr2 | 162486165 | 162487172 | Ptprt         | ENSMUSG00000053141 | -33  | 0.19 | 0.24 | 0.1  | 0.15 | 0.15 | 0.16 |
| chr2 | 25050787  | 25051354  | A830007P12Rik | ENSMUSG00000059555 | 1209 | 0.37 | 0.31 | 0.27 | 0.37 | 0.27 | 0.26 |
| chr2 | 30270741  | 30272134  | Crat          | ENSMUSG00000026853 | -584 | 0.13 | 0.14 | 0.09 | 0.08 | 0.08 | 0.09 |
| chr2 | 49921820  | 49922524  | Lypd6         | ENSMUSG00000050447 | 190  | 0.25 | NA   | 0.13 | 0.12 | 0.04 | 0.18 |
| chr2 | 91022624  | 91023220  | Madd          | ENSMUSG00000040687 | 83   | 0.15 | 0.09 | 0.09 | 0.13 | 0.1  | 0.13 |
| chr2 | 122527939 | 122528662 | Slc30a4       | ENSMUSG0000005802  | 75   | 0.15 | 0.15 | 0.1  | 0.11 | 0.1  | 0.13 |
| chr2 | 167602955 | 167603226 | Gm14321       | ENSMUSG00000084797 | 123  | 0.2  | 0.24 | 0.08 | 0.16 | 0.12 | 0.14 |
| chr2 | 10294110  | 10294736  | Sfmbt2        | ENSMUSG00000061186 | 214  | 0.39 | 0.41 | 0.11 | 0.14 | 0.26 | 0.22 |
| chr2 | 25463275  | 25464128  | Gm13520       | ENSMUSG00000052403 | 289  | 0.12 | 0.06 | 0.09 | 0.12 | 0.08 | 0.14 |
| chr2 | 32218207  | 32218911  | Ciz1          | ENSMUSG00000039205 | 29   | 0.13 | 0.17 | 0.1  | 0.17 | 0.07 | 0.18 |
| chr2 | 37307576  | 37308050  | Rabgap1       | ENSMUSG00000035437 | 48   | 0.05 | 0.12 | 0.08 | 0.16 | 0.09 | 0.13 |
| chr2 | 74513253  | 74513587  | Hoxd12        | ENSMUSG0000001823  | 434  | 0.45 | 0.25 | 0.12 | 0.21 | 0.23 | 0.13 |
| chr2 | 118528155 | 118530043 | Gm1337        | ENSMUSG00000078137 | 600  | 0.18 | 0.23 | 0.11 | 0.18 | 0.15 | 0.17 |
| chr2 | 127481848 | 127482227 | Mal           | ENSMUSG00000027375 | -82  | 0.08 | 0.12 | 0.1  | 0.18 | 0.16 | 0.14 |
| chr2 | 162769165 | 162769403 | L3mbtl1       | ENSMUSG00000035576 | 83   | 0.09 | 0.09 | 0.12 | 0.19 | 0.24 | 0.08 |
| chr2 | 44782083  | 44783316  | Gtdc1         | ENSMUSG00000036890 | -30  | 0.45 | 0.56 | 0.12 | 0.29 | 0.59 | 0.11 |
| chr2 | 84679411  | 84679831  | Slc43a1       | ENSMUSG00000027075 | 69   | 0.08 | 0.13 | 0.15 | 0.22 | 0.14 | 0.16 |
| chr2 | 104970896 | 104971218 | Wt1           | ENSMUSG00000016458 | 100  | 0.2  | 0.19 | 0.23 | 0.2  | 0.08 | 0.16 |
| chr2 | 157193258 | 157193702 | Manbal        | ENSMUSG00000063019 | 150  | 0.15 | 0.19 | 0.15 | 0.19 | 0.08 | 0.13 |
| chr2 | 170321572 | 170322299 | Pfdn4         | ENSMUSG00000052033 | 7    | 1    | 0.14 | 0.1  | 0.17 | 0.12 | 0.18 |
| chr2 | 30822943  | 30823507  | Tor1a         | ENSMUSG00000026849 | 122  | 0.19 | 0.11 | 0.11 | 0.14 | 0.14 | 0.09 |
| chr2 | 58210022  | 58210463  | Acvr1c        | ENSMUSG00000026834 | -79  | 0.13 | 0.21 | 0.16 | 0.23 | 0.04 | 0.08 |
| chr2 | 74520021  | 74521133  | Hoxd11        | ENSMUSG00000042499 | 521  | 0.16 | 0.12 | 0.1  | 0.16 | 0.12 | 0.13 |

|      |           |           |               |                    |      |      |      |      |      |      |      |
|------|-----------|-----------|---------------|--------------------|------|------|------|------|------|------|------|
| chr2 | 90894083  | 90894471  | Gm13778       | ENSMUSG00000086495 | -187 | 0.2  | 0.28 | 0.11 | 0.21 | 0.11 | 0.13 |
| chr2 | 103962787 | 103963504 | A930018P22Rik | ENSMUSG00000032671 | 219  | 0.15 | 0.24 | 0.12 | 0.15 | 0.09 | 0.1  |
| chr2 | 104397065 | 104397065 | Gm13884       | ENSMUSG00000082379 | 114  | 0.95 | 0.9  | 0.88 | 0.91 | 0.89 | 0.96 |
| chr2 | 109757715 | 109758529 | Lgr4          | ENSMUSG00000050199 | 318  | 0.07 | 0.09 | 0.08 | 0.1  | 0.08 | 0.11 |
| chr2 | 126758715 | 126759037 | 2010106G01Rik | ENSMUSG00000027366 | 95   | 0.57 | 0.22 | 0.23 | 0.24 | 0.29 | 0.25 |
| chr2 | 130121161 | 130121964 | Ebf4          | ENSMUSG00000053552 | -113 | 0.06 | 0.13 | 0.06 | 0.15 | 0.09 | 0.09 |
| chr2 | 130275853 | 130276510 | Ptpra         | ENSMUSG00000027303 | 167  | 0.13 | 0.19 | 0.09 | 0.15 | 0.07 | 0.15 |
| chr2 | 139892132 | 139892686 | Tasp1         | ENSMUSG00000039033 | 87   | 0.21 | 0.4  | 0.15 | 0.22 | 0.1  | 0.3  |
| chr2 | 11093724  | 11094080  | Prkcq         | ENSMUSG00000026778 | 162  | 0.43 | 0.41 | 0.1  | 0.27 | 0.3  | 0.21 |
| chr2 | 36086088  | 36086392  | Ptgs1         | ENSMUSG00000047250 | 164  | 0.5  | NA   | 0.1  | 0.23 | 0.11 | 0.27 |
| chr2 | 132672292 | 132672993 | Cr1s1         | ENSMUSG00000027357 | 240  | 0.27 | 0.17 | 0.12 | 0.18 | 0.21 | 0.18 |
| chr2 | 156246336 | 156247122 | Epb4.111      | ENSMUSG00000027624 | 84   | 0.14 | 0.15 | 0.12 | 0.11 | 0.06 | 0.16 |
| chr2 | 167328783 | 167329749 | Rnf114        | ENSMUSG00000006418 | 320  | 0.15 | 0.3  | 0.12 | 0.16 | 0.2  | 0.17 |
| chr2 | 179805226 | 179805496 | Gtpbp5        | ENSMUSG00000039069 | 68   | 0.11 | 0.12 | 0.1  | 0.12 | 0.06 | 0.08 |
| chr2 | 22477697  | 22479396  | Gad2          | ENSMUSG00000026787 | 821  | 0.11 | 0.07 | 0.13 | 0.19 | 0.08 | 0.17 |
| chr2 | 32167444  | 32168369  | Dnm1          | ENSMUSG00000026825 | -121 | 0.52 | 0.36 | 0.17 | 0.29 | 0.41 | 0.33 |
| chr2 | 33494719  | 33496834  | Lmx1b         | ENSMUSG00000038765 | 224  | 0.13 | 0.18 | 0.12 | 0.22 | 0.11 | 0.15 |
| chr2 | 35192130  | 35192631  | Stom          | ENSMUSG00000026880 | 116  | 0.18 | 0.25 | 0.07 | 0.2  | 0.1  | 0.11 |
| chr2 | 130889161 | 130889488 | Adam33        | ENSMUSG00000027318 | -75  | 0.08 | 0.17 | 0.22 | 0.33 | 1    | 0.1  |
| chr2 | 143835739 | 143837372 | Rrbp1         | ENSMUSG00000027422 | 444  | 0.13 | 0.17 | 0.11 | 0.15 | 0.15 | 0.14 |
| chr2 | 34226574  | 34227750  | Pbx3          | ENSMUSG00000038718 | -390 | 0.11 | 0.18 | 0.1  | 0.14 | 0.09 | 0.12 |
| chr2 | 131178186 | 131178896 | Rnf24         | ENSMUSG00000048911 | 57   | 0.08 | 0.21 | 0.18 | 0.17 | 0.16 | 0.14 |
| chr2 | 153353593 | 153356345 | 8430427H17Rik | ENSMUSG00000061411 | 738  | 0.13 | 0.12 | 0.12 | 0.13 | 0.15 | 0.1  |
| chr2 | 26442208  | 26442544  | Egfl7         | ENSMUSG00000026921 | 167  | 0.13 | 0.32 | 0.1  | 0.13 | 0.08 | 0.16 |
| chr2 | 74416586  | 74417195  | Lnp           | ENSMUSG00000009207 | 47   | 0.29 | 0.33 | 0.11 | 0.1  | 0.18 | 0.17 |
| chr2 | 127095466 | 127096585 | Gm10766       | ENSMUSG00000074822 | -257 | 0.23 | 0.27 | 0.17 | 0.19 | 0.16 | 0.13 |
| chr2 | 180921950 | 180922640 | Ppdpf         | ENSMUSG00000016344 | 343  | 0.06 | 0.2  | 0.16 | 0.27 | 0.17 | 0.2  |
| chr2 | 25947028  | 25947552  | Nacc2         | ENSMUSG00000026932 | 49   | 0.1  | 0.1  | 0.1  | 0.15 | 0.07 | 0.14 |
| chr2 | 71382191  | 71384980  | Dlx2          | ENSMUSG00000023391 | 422  | 0.13 | 0.13 | 0.12 | 0.15 | 0.1  | 0.16 |
| chr2 | 123916247 | 123916458 | Sema6d        | ENSMUSG00000027200 | 647  | 0.2  | 0.22 | 0.16 | 0.2  | 0.11 | 0.17 |

|      |           |           |               |                    |      |      |      |      |      |      |      |
|------|-----------|-----------|---------------|--------------------|------|------|------|------|------|------|------|
| chr2 | 153475167 | 153475666 | Dnmt3b        | ENSMUSG00000027478 | 230  | 0.18 | 0.09 | 0.09 | 0.14 | 0.15 | 0.12 |
| chr2 | 38780777  | 38781860  | Nr6a1         | ENSMUSG00000063972 | 419  | 0.11 | 0.11 | 0.12 | 0.2  | 0.08 | 0.19 |
| chr2 | 66094416  | 66094900  | Ttc21b        | ENSMUSG00000034848 | -9   | 0.17 | 0.12 | 0.15 | 0.18 | 0.1  | 0.08 |
| chr2 | 70313172  | 70315245  | Sp5           | ENSMUSG00000075304 | 1228 | 0.18 | 0.28 | 0.17 | 0.23 | 0.15 | 0.12 |
| chr2 | 93027531  | 93028861  | Trp53i11      | ENSMUSG00000068735 | 491  | 0.18 | 0.12 | 0.11 | 0.13 | 0.14 | 0.16 |
| chr2 | 119419967 | 119420453 | 1700020I14Rik | ENSMUSG00000085438 | 177  | 0.13 | 0.24 | 0.08 | 0.14 | 0.19 | 0.13 |
| chr2 | 147019595 | 147020930 | Nkx2-2        | ENSMUSG00000027434 | -284 | 0.19 | 0.21 | 0.11 | 0.12 | 0.1  | 0.14 |
| chr2 | 28323484  | 28323920  | Mrps2         | ENSMUSG00000035772 | 116  | 0.1  | 0.09 | 0.08 | 0.14 | 0.06 | 0.14 |
| chr2 | 31101077  | 31102033  | Ncs1          | ENSMUSG00000062661 | 212  | 0.16 | 0.12 | 0.11 | 0.11 | 0.19 | 0.11 |
| chr2 | 145728854 | 145729317 | Naa20         | ENSMUSG0000002728  | 108  | 0.26 | 0.12 | 0.1  | 0.08 | 0.2  | 0.16 |
| chr2 | 155207395 | 155208068 | Trp53inp2     | ENSMUSG00000038375 | 181  | 0.2  | 0.32 | 0.11 | 0.2  | 0.16 | 0.2  |
| chr2 | 172265816 | 172266290 | 2410001C21Rik | ENSMUSG00000027502 | -3   | 0.33 | 0.1  | 0.15 | 0.2  | 0.15 | 0.16 |
| chr2 | 180773581 | 180773940 | Chrna4        | ENSMUSG00000027577 | 132  | 0.14 | 0.07 | 0.11 | 0.19 | 0.11 | 0.09 |
| chr2 | 17985829  | 17987250  | Milt10        | ENSMUSG00000026743 | 518  | 0.24 | 0.3  | 0.11 | 0.18 | 0.2  | 0.17 |
| chr2 | 25284014  | 25284597  | Abca2         | ENSMUSG00000026944 | 82   | 0.07 | 0.06 | 0.07 | 0.08 | 0.06 | 0.12 |
| chr2 | 32567695  | 32568778  | Cdk9          | ENSMUSG00000009555 | -463 | 0.13 | 0.16 | 0.1  | 0.17 | 0.11 | 0.16 |
| chr2 | 51003071  | 51003735  | Rnd3          | ENSMUSG00000017144 | 1211 | 0.08 | 0.1  | 0.08 | 0.14 | 0.05 | 0.14 |
| chr2 | 93796091  | 93797410  | Gm13889       | ENSMUSG00000075021 | 534  | 0.15 | 0.19 | 0.14 | 0.2  | 0.12 | 0.15 |
| chr2 | 112295030 | 112295499 | 2900064A13Rik | ENSMUSG00000055943 | 110  | 0.27 | 1    | 0.13 | 0.1  | 0.12 | 0.19 |
| chr2 | 114026901 | 114027236 | Zfp770        | ENSMUSG00000040321 | 108  | 0.08 | 0.17 | 0.09 | 0.08 | 0.21 | 0.12 |
| chr2 | 160191118 | 160193371 | Maftb         | ENSMUSG00000074622 | 557  | 0.15 | 0.15 | 0.12 | 0.18 | 0.12 | 0.17 |
| chr2 | 5058655   | 5059139   | Ccdc3         | ENSMUSG00000026676 | 75   | 0.07 | 0.1  | 0.07 | 0.07 | 0.05 | 0.1  |
| chr2 | 29602769  | 29603166  | Gm13420       | ENSMUSG00000079497 | -197 | 0.18 | 0.18 | 0.1  | 0.18 | 0.14 | 0.09 |
| chr2 | 33742507  | 33743209  | Fam125b       | ENSMUSG00000038740 | 144  | 0.2  | 0.14 | 0.14 | 0.17 | 0.15 | 0.12 |
| chr2 | 131004903 | 131005600 | Cenpb         | ENSMUSG00000068267 | 361  | 0.08 | 0.12 | 0.09 | 0.12 | 0.13 | 0.12 |
| chr2 | 131087981 | 131088614 | Pank2         | ENSMUSG00000037514 | 66   | 0.17 | 0.39 | 0.14 | 0.38 | 0.22 | 0.23 |
| chr2 | 179759014 | 179760536 | Lsm14b        | ENSMUSG00000039108 | 83   | 0.11 | 0.27 | 0.14 | 0.18 | 0.14 | 0.13 |
| chr2 | 44964834  | 44965853  | Zeb2          | ENSMUSG00000026872 | 421  | 0.25 | 0.21 | 0.12 | 0.22 | 0.19 | 0.16 |
| chr2 | 76513117  | 76513847  | Plekha3       | ENSMUSG00000002733 | 144  | 0.15 | 0.15 | 0.09 | 0.15 | 0.13 | 0.11 |
| chr2 | 91297635  | 91298219  | Lrp4          | ENSMUSG00000027253 | 259  | 0.16 | 0.4  | 0.13 | 0.24 | 0.24 | 0.17 |

|      |           |           |            |                    |      |      |      |      |      |      |      |
|------|-----------|-----------|------------|--------------------|------|------|------|------|------|------|------|
| chr2 | 105512684 | 105512957 | Pax6       | ENSMUSG00000027168 | 803  | 0.15 | 0.26 | 0.09 | 0.27 | 0.05 | 0.18 |
| chr2 | 106533450 | 106534749 | Mpped2     | ENSMUSG00000016386 | 673  | 0.13 | 0.14 | 0.11 | 0.1  | 0.1  | 0.12 |
| chr2 | 173484903 | 173485840 | Ppp4r11-ps | ENSMUSG00000055897 | -366 | 0.32 | 0.24 | 0.13 | 0.16 | 0.22 | 0.18 |
| chr2 | 26771769  | 26772402  | Surf1      | ENSMUSG00000015790 | -265 | 0.32 | 0.38 | 0.1  | 0.22 | 0.21 | 0.19 |
| chr2 | 30837176  | 30838168  | BC005624   | ENSMUSG00000026851 | -211 | 0.12 | 0.11 | 0.12 | 0.18 | 0.08 | 0.11 |
| chr2 | 102026152 | 102026590 | Ldlrad3    | ENSMUSG00000048058 | 144  | 0.09 | 0.05 | 0.08 | 0.11 | 0.06 | 0.15 |
| chr2 | 104333428 | 104334849 | Hipk3      | ENSMUSG00000027177 | -291 | 0.13 | 0.15 | 0.11 | 0.1  | 0.11 | 0.12 |
| chr2 | 122194363 | 122194737 | Shf        | ENSMUSG00000033256 | 18   | 0.67 | 0.57 | 0.12 | 0.21 | 0.53 | 0.17 |
| chr2 | 166630843 | 166631487 | Argef2     | ENSMUSG00000074582 | 77   | 0.14 | 0.26 | 0.08 | 0.11 | 0.09 | 0.13 |
| chr2 | 14525635  | 14526657  | Cacnb2     | ENSMUSG00000057914 | 213  | 0.14 | 0.33 | 0.11 | 0.17 | 0.08 | 0.16 |
| chr2 | 71205575  | 71205830  | Slc25a12   | ENSMUSG00000027010 | -112 | 0.14 | 0.07 | 0.09 | 0.12 | 0.08 | 0.15 |
| chr2 | 92273974  | 92274542  | Cry2       | ENSMUSG00000068742 | -65  | 0.3  | 0.67 | 0.14 | 0.16 | 0.12 | 0.16 |
| chr2 | 109120771 | 109121268 | Mettl15    | ENSMUSG00000057234 | -160 | 0.12 | 0.09 | 0.13 | 0.15 | 0.07 | 0.13 |
| chr2 | 139996229 | 139996732 | Esf1       | ENSMUSG00000045624 | -195 | 0.15 | 0.12 | 0.1  | 0.14 | 0.08 | 0.11 |
| chr2 | 5871916   | 5872147   | Upf2       | ENSMUSG00000043241 | -484 | 0.75 | 1    | 0.57 | 0.5  | 1    | 0.43 |
| chr2 | 28048459  | 28048930  | Olfm1      | ENSMUSG00000026833 | 182  | 0.11 | 0.22 | 0.09 | 0.15 | 0.07 | 0.08 |
| chr2 | 52279778  | 52280388  | Arl5a      | ENSMUSG00000036093 | 338  | 0.31 | 0.38 | 0.13 | 0.14 | 0.24 | 0.15 |
| chr2 | 90623168  | 90623422  | Agbl2      | ENSMUSG00000040812 | -100 | 0.07 | 0.1  | 0.07 | 0.11 | 0.23 | 0.26 |
| chr2 | 118938435 | 118938916 | Rad51      | ENSMUSG00000027323 | 146  | 0.04 | 0.16 | 0.08 | 0.18 | 0.06 | 0.15 |
| chr2 | 164704816 | 164705615 | Pcif1      | ENSMUSG00000039849 | 350  | 0.18 | 0.17 | 0.12 | 0.12 | 0.15 | 0.13 |
| chr2 | 168094018 | 168094729 | Kcng1      | ENSMUSG00000074575 | 458  | 0.89 | 0.87 | 0.7  | 0.66 | 0.85 | 0.79 |
| chr2 | 3429792   | 3430554   | Hspa14     | ENSMUSG00000051396 | -158 | 0.14 | 0.21 | 0.11 | 0.17 | 0.22 | 0.17 |
| chr2 | 157385786 | 157386317 | Nnat       | ENSMUSG00000067786 | 237  | 0.47 | 0.5  | 0.39 | 0.57 | 0.43 | 0.49 |
| chr2 | 6793297   | 6793960   | Celf2      | ENSMUSG00000002107 | 15   | 0.11 | 0.12 | 0.08 | 0.1  | 0.08 | 0.08 |
| chr2 | 53050011  | 53051550  | Prpf40a    | ENSMUSG00000061136 | -542 | 0.62 | 0.36 | 0.14 | 0.15 | 0.48 | 0.14 |
| chr2 | 119443908 | 119444388 | Nusap1     | ENSMUSG00000027306 | 114  | 0.33 | 0.41 | 0.23 | 1    | 0.46 | 0.13 |
| chr2 | 121274759 | 121275810 | Serf2      | ENSMUSG00000074884 | 353  | 0.18 | 0.14 | 0.1  | 0.11 | 0.15 | 0.14 |
| chr2 | 147009645 | 147010289 | Nkx2-2as   | ENSMUSG00000086509 | 148  | 0.14 | 0.31 | 0.12 | 0.27 | 0.09 | 0.12 |
| chr2 | 152840870 | 152841217 | Pdrg1      | ENSMUSG00000027472 | 35   | 0.5  | 0.11 | 0.09 | 0.19 | 0.31 | 0.23 |
| chr2 | 164611108 | 164611889 | Snx21      | ENSMUSG00000050373 | 175  | 0.11 | 0.12 | 0.09 | 0.16 | 0.08 | 0.14 |

|      |           |           |               |                    |      |      |      |      |      |      |      |
|------|-----------|-----------|---------------|--------------------|------|------|------|------|------|------|------|
| chr2 | 166821196 | 166821941 | Stau1         | ENSMUSG00000039536 | 35   | 0.17 | 0.11 | 0.09 | 0.1  | 0.22 | 0.13 |
| chr2 | 11524506  | 11524934  | Rbm17         | ENSMUSG00000037197 | 37   | 0.1  | 0.16 | 0.1  | 0.09 | 0.07 | 0.13 |
| chr2 | 31169601  | 31170247  | Hmcn2         | ENSMUSG00000055632 | -11  | 0.13 | 0.07 | 0.09 | 0.14 | 0.1  | 0.14 |
| chr2 | 32250994  | 32252227  | Ptges2        | ENSMUSG00000026820 | 194  | 0.4  | 0.12 | 0.11 | 0.15 | 0.16 | 0.19 |
| chr2 | 35055749  | 35056887  | Rab14         | ENSMUSG00000026878 | -9   | 0.1  | 0.14 | 0.1  | 0.13 | 0.08 | 0.11 |
| chr2 | 35834632  | 35835385  | Tlll1         | ENSMUSG00000026885 | 136  | 0.1  | 0.11 | 0.08 | 0.12 | 0.08 | 0.11 |
| chr2 | 61643110  | 61643957  | Tbr1          | ENSMUSG00000035033 | -786 | 0.04 | 0.08 | 0.2  | 0.2  | 0.07 | 0.14 |
| chr2 | 155101878 | 155102847 | Map1lc3a      | ENSMUSG00000027602 | 329  | 0.13 | 0.2  | 0.13 | 0.15 | 0.16 | 0.16 |
| chr2 | 174298051 | 174298709 | Slmo2         | ENSMUSG00000016257 | 12   | 0.47 | 0.81 | 0.16 | 0.28 | 0.38 | 0.27 |
| chr2 | 48804483  | 48804861  | Orc4          | ENSMUSG00000026761 | 79   | 0.17 | 0.29 | 0.12 | 0.13 | 0.09 | 0.15 |
| chr2 | 78708697  | 78710173  | Ube2e3        | ENSMUSG00000027011 | 231  | 0.19 | 0.23 | 0.09 | 0.11 | 0.16 | 0.13 |
| chr2 | 126378658 | 126379242 | Slc27a2       | ENSMUSG00000027359 | -376 | 0.11 | 0.11 | 0.12 | 0.13 | 0.14 | 0.12 |
| chr2 | 32442459  | 32442837  | St6galnac4    | ENSMUSG00000079442 | 33   | 0.15 | 0.24 | 0.11 | 0.22 | 0.09 | 0.12 |
| chr2 | 104582610 | 104583108 | Depdc7        | ENSMUSG00000027173 | 176  | 0.27 | 0.11 | 0.07 | 0.15 | 0.14 | 0.14 |
| chr2 | 125977658 | 125978238 | 4930525F21Rik | ENSMUSG00000027209 | -228 | 0.21 | 0.15 | 0.1  | 0.21 | 0.13 | 0.15 |
| chr2 | 12340400  | 12341121  | Fam188a       | ENSMUSG00000026767 | 116  | 0.15 | 0.17 | 0.12 | 0.14 | 0.19 | 0.14 |
| chr2 | 18313868  | 18314521  | Dnajc1        | ENSMUSG00000026740 | -147 | 0.14 | 0.23 | 0.1  | 0.16 | 0.1  | 0.12 |
| chr2 | 25430152  | 25430462  | Mamdc4        | ENSMUSG00000026941 | 58   | 0.2  | 0.17 | 0.13 | 0.12 | 0.39 | 0.15 |
| chr2 | 130468137 | 130468716 | Prosapip1     | ENSMUSG00000037703 | 113  | 0.1  | 0.18 | 0.1  | 0.14 | 0.13 | 0.14 |
| chr2 | 25413177  | 25413660  | Edf1          | ENSMUSG00000015092 | 51   | 0.19 | 0.16 | 0.11 | 0.11 | 0.24 | 0.12 |
| chr2 | 70955923  | 70956430  | Cybrd1        | ENSMUSG00000027015 | 196  | 0.18 | 0.23 | 0.1  | 0.19 | 0.29 | 0.12 |
| chr2 | 75541643  | 75543008  | Nfe2l2        | ENSMUSG00000015839 | 221  | 0.14 | 0.18 | 0.08 | 0.24 | 0.18 | 0.16 |
| chr2 | 76244166  | 76245594  | Osbpl6        | ENSMUSG00000042359 | 315  | 0.15 | 0.17 | 0.11 | 0.15 | 0.18 | 0.12 |
| chr2 | 91761628  | 91762529  | Chrm4         | ENSMUSG00000040495 | -268 | 0.14 | 0.13 | 0.1  | 0.15 | 0.08 | 0.15 |
| chr2 | 116946249 | 116947693 | Spred1        | ENSMUSG00000027351 | -139 | 0.09 | 0.1  | 0.07 | 0.09 | 0.07 | 0.13 |
| chr2 | 147869612 | 147872701 | Foxa2         | ENSMUSG00000037025 | 44   | 0.11 | 0.13 | 0.14 | 0.17 | 0.12 | 0.18 |
| chr2 | 152222464 | 152224736 | Sox12         | ENSMUSG00000051817 | 182  | 0.09 | 0.09 | 0.09 | 0.16 | 0.11 | 0.14 |
| chr2 | 11422928  | 11423838  | Pfkfb3        | ENSMUSG00000026773 | -56  | 0.32 | 0.33 | 0.11 | 0.23 | 0.24 | 0.16 |
| chr2 | 25066412  | 25067110  | Cobra1        | ENSMUSG00000013465 | 140  | 1    | 1    | 0.15 | 0.28 | 0.21 | 0.19 |
| chr2 | 34655274  | 34655480  | Rabepk        | ENSMUSG00000070953 | -103 | 0.22 | 0.22 | 0.14 | 0.2  | 0.14 | 0.16 |

|      |           |           |               |                    |      |      |      |      |      |      |      |
|------|-----------|-----------|---------------|--------------------|------|------|------|------|------|------|------|
| chr2 | 120834076 | 120834377 | Ccndbp1       | ENSMUSG00000023572 | 87   | 0.19 | 0.35 | 0.12 | 0.16 | 0.25 | 0.12 |
| chr2 | 154899820 | 154900212 | Ahcy          | ENSMUSG00000027597 | 167  | 0.12 | 0.15 | 0.12 | 0.21 | 0.08 | 0.11 |
| chr2 | 160556742 | 160557862 | Plcg1         | ENSMUSG00000016933 | 266  | 0.14 | 0.22 | 0.1  | 0.15 | 0.09 | 0.13 |
| chr2 | 160713497 | 160713965 | Gm16751       | ENSMUSG00000085303 | 33   | 0.38 | 1    | 0.19 | 0.26 | 0.48 | 0.23 |
| chr2 | 4802709   | 4803691   | Sephs1        | ENSMUSG00000026662 | -91  | 0.14 | 0.11 | 0.12 | 0.17 | 0.12 | 0.15 |
| chr2 | 25036146  | 25037490  | Nrarp         | ENSMUSG00000078202 | 540  | 0.15 | 0.14 | 0.15 | 0.12 | 0.13 | 0.15 |
| chr2 | 61431061  | 61431649  | Tank          | ENSMUSG00000064289 | 221  | 0.08 | 0.09 | 0.1  | 0.15 | 0.05 | 0.12 |
| chr2 | 84499083  | 84499478  | Gm13718       | ENSMUSG00000086598 | 44   | 0.92 | 0.93 | 0.81 | 0.93 | 0.89 | 0.96 |
| chr2 | 132770725 | 132771339 | Fermt1        | ENSMUSG00000027356 | 333  | 0.18 | 0.16 | 0.32 | 0.56 | 0.12 | 0.21 |
| chr2 | 158436479 | 158437350 | Slc32a1       | ENSMUSG00000037771 | 420  | 0.1  | 0.38 | 0.09 | 0.16 | 0.18 | 0.07 |
| chr2 | 165817968 | 165819039 | Gm11464       | ENSMUSG00000087351 | -486 | 0.12 | 0.13 | 0.14 | 0.2  | 0.1  | 0.15 |
| chr2 | 25227675  | 25228511  | 2010317E24Rik | ENSMUSG00000026955 | 252  | 0.11 | 0.16 | 0.12 | 0.13 | 0.08 | 0.18 |
| chr2 | 73748680  | 73749425  | Atp5g3        | ENSMUSG00000018770 | 287  | 0.11 | 0.09 | 0.09 | 0.13 | 0.08 | 0.14 |
| chr2 | 75670187  | 75670614  | Agps          | ENSMUSG00000042410 | 166  | 0.1  | 0.09 | 0.09 | 0.1  | 0.24 | 0.08 |
| chr2 | 130099789 | 130100551 | Nop56         | ENSMUSG00000027405 | 4    | 0.09 | 0.1  | 0.1  | 0.12 | 0.14 | 0.1  |
| chr2 | 163575516 | 163576062 | Ada           | ENSMUSG00000017697 | 186  | 0.17 | 0.41 | 0.12 | 0.16 | 0.24 | 0.25 |
| chr2 | 25147675  | 25147999  | E130003G02Rik | ENSMUSG00000085830 | 1097 | 0.2  | 0.4  | 0.19 | 0.27 | 0.14 | 0.28 |
| chr2 | 32549297  | 32549854  | Fpgs          | ENSMUSG00000009566 | 80   | 0.09 | 0.13 | 0.09 | 0.12 | 0.12 | 0.15 |
| chr2 | 105508926 | 105509264 | Pax6          | ENSMUSG00000027168 | 42   | 0.1  | 0.11 | 0.07 | 0.13 | 0.07 | 0.14 |
| chr2 | 126701367 | 126702259 | Trpm7         | ENSMUSG00000027365 | 40   | 0.13 | 0.09 | 0.08 | 0.18 | 0.15 | 0.15 |
| chr2 | 130665379 | 130666132 | 4930402H24Rik | ENSMUSG00000027309 | -332 | 0.12 | 0.15 | 0.12 | 0.11 | 0.16 | 0.17 |
| chr2 | 134611723 | 134612540 | Plcb1         | ENSMUSG00000051177 | 236  | 0.17 | 0.13 | 0.08 | 0.19 | 0.12 | 0.11 |
| chr2 | 154261865 | 154262731 | Cbfa2l2       | ENSMUSG00000038533 | 81   | 0.19 | 0.34 | 0.26 | 0.29 | 0.14 | 0.21 |
| chr2 | 158620376 | 158620798 | Dhx35         | ENSMUSG00000027655 | 44   | 0.1  | 0.07 | 0.11 | 0.13 | 0.07 | 0.15 |
| chr2 | 168055244 | 168057238 | Dpm1          | ENSMUSG00000078919 | -665 | 0.19 | 0.14 | 0.13 | 0.15 | 0.17 | 0.17 |
| chr2 | 9803880   | 9804727   | 4930412O13Rik | ENSMUSG00000025783 | 40   | 0.13 | 0.23 | 0.14 | 0.16 | 0.1  | 0.21 |
| chr2 | 84877212  | 84877779  | Ssrp1         | ENSMUSG00000027067 | 140  | 0.11 | 0.07 | 0.15 | 0.11 | 0.07 | 0.15 |
| chr2 | 91899628  | 91900269  | 2900072N19Rik | ENSMUSG00000087018 | -422 | 0.12 | 0.31 | 0.11 | 0.15 | 0.16 | 0.16 |
| chr2 | 105238857 | 105239605 | Rcn1          | ENSMUSG00000005973 | 245  | 0.16 | 0.33 | 0.08 | 0.16 | 0.13 | 0.18 |
| chr2 | 155517582 | 155518184 | Trpc4ap       | ENSMUSG00000038324 | -24  | 0.12 | 0.22 | 0.1  | 0.12 | 0.15 | 0.15 |

|      |           |           |               |                    |      |      |      |      |      |      |      |
|------|-----------|-----------|---------------|--------------------|------|------|------|------|------|------|------|
| chr2 | 155601427 | 155601632 | Mmp24         | ENSMUSG00000027612 | 451  | 0.09 | 0.55 | 0.08 | 0.12 | 0.15 | 0.13 |
| chr2 | 158593858 | 158594344 | Fam83d        | ENSMUSG00000027654 | 272  | 0.11 | 0.12 | 0.17 | 0.18 | 0.18 | 0.19 |
| chr2 | 164659397 | 164659685 | Ctsa          | ENSMUSG00000017760 | 11   | 0.14 | 0.92 | 0.13 | 0.15 | 0.18 | 0.17 |
| chr2 | 167363367 | 167364470 | Snai1         | ENSMUSG00000042821 | 223  | 0.23 | 0.29 | 0.18 | 0.16 | 0.2  | 0.22 |
| chr2 | 29917383  | 29917793  | Set           | ENSMUSG00000054766 | 215  | 0.12 | 0.08 | 0.11 | 0.13 | 0.06 | 0.12 |
| chr2 | 32006380  | 32007164  | Prrc2b        | ENSMUSG00000039262 | 170  | 0.33 | 0.38 | 0.2  | 0.25 | 0.28 | 0.16 |
| chr2 | 154438851 | 154439704 | Zfp341        | ENSMUSG00000059842 | 244  | 0.16 | 0.12 | 0.12 | 0.18 | 0.13 | 0.14 |
| chr2 | 157029722 | 157030755 | Rbl1          | ENSMUSG00000027641 | 10   | 0.17 | 0.24 | 0.1  | 0.17 | 0.13 | 0.14 |
| chr2 | 160698084 | 160699010 | Zhx3          | ENSMUSG00000035877 | -239 | 0.09 | 0.1  | 0.09 | 0.11 | 0.08 | 0.12 |
| chr2 | 181193207 | 181195236 | Zbtb46        | ENSMUSG00000027583 | -137 | 0.15 | 0.19 | 0.1  | 0.13 | 0.13 | 0.13 |
| chr2 | 74570762  | 74571094  | Hoxd3         | ENSMUSG00000079277 | -43  | 0.09 | 0.09 | 0.09 | 0.17 | 0.5  | 0.16 |
| chr2 | 120434972 | 120435317 | Lrrc57        | ENSMUSG00000027286 | -106 | 0.15 | 0.08 | 0.09 | 0.18 | 0.08 | 0.22 |
| chr2 | 126834347 | 126834792 | Ap4e1         | ENSMUSG00000001998 | 116  | 0.17 | 0.18 | 0.14 | 0.18 | 0.12 | 0.18 |
| chr2 | 127033969 | 127034340 | 1810024B03Rik | ENSMUSG00000044145 | -164 | 0.16 | 0.28 | 0.18 | 0.2  | 0.12 | 0.17 |
| chr2 | 173935524 | 173936332 | Npepl1        | ENSMUSG00000039263 | 78   | 0.15 | 0.14 | 0.11 | 0.15 | 0.13 | 0.12 |
| chr2 | 28771398  | 28771854  | Barhl1        | ENSMUSG00000026805 | 306  | 1    | 1    | 0.38 | 0.25 | 0.5  | 0.2  |
| chr2 | 29475399  | 29475705  | Rapgef1       | ENSMUSG00000039844 | 122  | 0.22 | 0.36 | 0.14 | 0.1  | 0.1  | 0.11 |
| chr2 | 30061366  | 30061643  | Ccb1          | ENSMUSG00000039648 | -137 | 0.27 | 0.25 | 0.17 | 0.4  | 0.15 | 0.22 |
| chr2 | 61549619  | 61550020  | Psmc14        | ENSMUSG00000026914 | 68   | 0.16 | 0.07 | 0.08 | 0.1  | 0.09 | 0.12 |
| chr2 | 70662796  | 70663696  | Tik1          | ENSMUSG00000041997 | 39   | 0.21 | 0.12 | 0.09 | 0.18 | 0.16 | 0.11 |
| chr2 | 118375184 | 118375435 | Bmf           | ENSMUSG00000040093 | 89   | 0.09 | 0.07 | 0.11 | 0.12 | 0.07 | 0.1  |
| chr2 | 180068382 | 180069716 | Gata5         | ENSMUSG00000015627 | 210  | 0.19 | 0.12 | 0.1  | 0.18 | 0.16 | 0.15 |
| chr2 | 29989180  | 29989560  | Tbc1d13       | ENSMUSG00000039678 | 104  | 0.17 | 0.08 | 0.09 | 0.15 | 0.11 | 0.11 |
| chr2 | 168031858 | 168032980 | Adnp          | ENSMUSG00000051149 | -210 | 0.12 | 0.11 | 0.08 | 0.11 | 0.11 | 0.12 |
| chr2 | 117168382 | 117168799 | Rasgrp1       | ENSMUSG00000027347 | -145 | 0.06 | 0.1  | 0.15 | 0.09 | 0.08 | 0.11 |
| chr2 | 132403315 | 132404019 | Gpcpd1        | ENSMUSG00000027346 | 202  | 0.18 | 0.29 | 0.11 | 0.2  | 0.14 | 0.23 |
| chr2 | 154375197 | 154375705 | 1700003F12Rik | ENSMUSG00000038523 | 788  | 0.33 | 1    | 0.29 | NA   | 1    | 0.42 |
| chr2 | 155833632 | 155834037 | 6430550D23Rik | ENSMUSG00000074646 | -191 | 0.28 | 0.5  | 0.13 | 0.19 | 0.17 | 0.2  |
| chr2 | 165151530 | 165152155 | Elmo2         | ENSMUSG00000017670 | 137  | 0.18 | 0.21 | 0.14 | 0.21 | 0.15 | 0.22 |
| chr2 | 6243430   | 6244591   | Usp6nl        | ENSMUSG00000039046 | 297  | 0.1  | 0.13 | 0.08 | 0.15 | 0.09 | 0.09 |



|      |           |           |               |                    |      |      |      |      |      |      |      |
|------|-----------|-----------|---------------|--------------------|------|------|------|------|------|------|------|
| chr2 | 25110674  | 25111398  | Ndor1         | ENSMUSG00000006471 | -255 | 0.3  | 0.12 | 0.15 | 0.19 | 0.18 | 0.2  |
| chr2 | 26357909  | 26359513  | Notch1        | ENSMUSG00000026923 | 631  | 0.17 | 0.33 | 0.15 | 0.2  | 0.23 | 0.14 |
| chr2 | 29658105  | 29658642  | Sic27a4       | ENSMUSG00000059316 | 219  | 0.11 | 0.07 | 0.1  | 0.1  | 0.08 | 0.14 |
| chr2 | 52531161  | 52532129  | Cacnb4        | ENSMUSG00000017412 | 17   | 0.12 | 0.11 | 0.14 | 0.16 | 0.1  | 0.12 |
| chr2 | 128689566 | 128689938 | Fbln7         | ENSMUSG00000027386 | 84   | 0.06 | 0.06 | 0.03 | 0.06 | 0.12 | 0.16 |
| chr2 | 144096066 | 144096901 | Snx5          | ENSMUSG00000027423 | -175 | 0.13 | 0.14 | 0.09 | 0.11 | 0.12 | 0.12 |
| chr2 | 153318026 | 153318511 | 8430427H17Rik | ENSMUSG00000061411 | -15  | 0.22 | 0.15 | 0.16 | 0.14 | 0.14 | 0.12 |
| chr2 | 164595126 | 164595604 | Gm11457       | ENSMUSG00000086453 | -199 | 0.12 | 0.07 | 0.1  | 0.19 | 0.19 | 0.23 |
| chr2 | 164736138 | 164737430 | Gm11458       | ENSMUSG00000085436 | -70  | 0.32 | 0.3  | 0.16 | 0.18 | 0.35 | 0.17 |
| chr2 | 168590555 | 168590772 | Sall4         | ENSMUSG00000027547 | 83   | 0.06 | 0.15 | 0.09 | 0.19 | 0.17 | 0.19 |
| chr2 | 104551805 | 104552622 | Tcp111        | ENSMUSG00000027175 | 37   | 0.11 | 0.11 | 0.1  | 0.11 | 0.08 | 0.12 |
| chr2 | 151527730 | 151528723 | 5430405G05Rik | ENSMUSG00000044364 | 482  | 0.28 | 0.2  | 0.1  | 0.16 | 0.25 | 0.1  |
| chr2 | 5863568   | 5863849   | Dhtkd1        | ENSMUSG00000025815 | 81   | 0.11 | 0.22 | 0.1  | 0.21 | 0.08 | 0.14 |
| chr2 | 34609373  | 34610068  | Gapvd1        | ENSMUSG00000026867 | 211  | 0.17 | 0.15 | 0.1  | 0.14 | 0.14 | 0.12 |
| chr2 | 93482754  | 93483805  | Alx4          | ENSMUSG00000040310 | 734  | 0.17 | 0.23 | 0.11 | 0.13 | 0.15 | 0.12 |
| chr2 | 112207883 | 112208221 | Tmem85        | ENSMUSG00000027131 | 125  | 0.24 | 0.17 | 0.11 | 0.19 | 0.18 | 0.15 |
| chr2 | 26207279  | 26208148  | Dnlz          | ENSMUSG00000075467 | -93  | 0.18 | 0.1  | 0.1  | 0.21 | 0.15 | 0.15 |
| chr2 | 29948954  | 29949475  | Zdhhc12       | ENSMUSG00000015335 | -78  | 0.12 | 0.19 | 0.09 | 0.1  | 0.21 | 0.1  |
| chr2 | 52716665  | 52717914  | Fmnl2         | ENSMUSG00000036053 | 395  | 0.13 | 0.15 | 0.14 | 0.12 | 0.12 | 0.15 |
| chr2 | 113839099 | 113839559 | A530058N18Rik | ENSMUSG00000092201 | 30   | 0.1  | 0.08 | 0.1  | 0.13 | 0.05 | 0.14 |
| chr2 | 157391660 | 157391988 | Blcap         | ENSMUSG00000067787 | 243  | 0.14 | 0.11 | 0.13 | 0.15 | 0.08 | 0.16 |
| chr2 | 160934254 | 160935412 | Chd6          | ENSMUSG00000057133 | -93  | 0.1  | 0.1  | 0.12 | 0.15 | 0.09 | 0.14 |
| chr2 | 168780389 | 168781096 | Zfp64         | ENSMUSG00000027551 | 17   | 0.18 | 0.15 | 0.13 | 0.36 | 0.23 | 0.24 |
| chr2 | 5872337   | 5873004   | Upf2          | ENSMUSG00000043241 | 155  | 0.1  | 0.22 | 0.15 | 0.16 | 0.14 | 0.16 |
| chr2 | 94277609  | 94278412  | Api5          | ENSMUSG00000027193 | 115  | 0.14 | 0.12 | 0.2  | 0.16 | 0.12 | 0.15 |
| chr2 | 130389302 | 130390050 | Mrps26        | ENSMUSG00000037740 | 198  | 0.21 | 0.23 | 0.1  | 0.21 | 0.26 | 0.14 |
| chr2 | 150729927 | 150730559 | Abhd12        | ENSMUSG00000032046 | 140  | 0.14 | 0.13 | 0.06 | 0.12 | 0.09 | 0.15 |
| chr2 | 165213449 | 165213834 | Zfp334        | ENSMUSG00000017667 | 118  | 0.2  | 0.12 | 0.1  | 0.13 | 0.31 | 0.15 |
| chr2 | 59449910  | 59450804  | Tanc1         | ENSMUSG00000035168 | 258  | 0.11 | 0.17 | 0.13 | 0.14 | 0.1  | 0.13 |
| chr2 | 130493298 | 130493654 | Itpa          | ENSMUSG00000074797 | 130  | 0.09 | 0.31 | 0.1  | 0.16 | 0.12 | 0.15 |

|      |           |           |               |                     |      |      |      |      |      |      |      |
|------|-----------|-----------|---------------|---------------------|------|------|------|------|------|------|------|
| chr2 | 156137649 | 156138545 | 4921517L17Rik | ENSMUSG00000038085  | 62   | 0.13 | 0.1  | 0.11 | 0.19 | 0.12 | 0.15 |
| chr2 | 178141930 | 178142355 | Sycp2         | ENSMUSG00000060445  | -15  | 1    | 1    | 0.93 | 0.95 | 0.96 | 0.86 |
| chr2 | 26264361  | 26264848  | Inpp5e        | ENSMUSG00000026925  | 43   | 0.27 | 0.2  | 0.14 | 0.11 | 0.34 | 0.16 |
| chr2 | 27531959  | 27533449  | Rxra          | ENSMUSG00000015846  | 744  | 0.18 | 0.13 | 0.12 | 0.16 | 0.2  | 0.14 |
| chr2 | 35904756  | 35904957  | Ndufa8        | ENSMUSG00000026895  | 70   | 0.29 | 0.62 | 0.08 | 0.22 | 0.12 | 0.33 |
| chr2 | 70893609  | 70894336  | Mettl8        | ENSMUSG00000041975  | -343 | 1    | 0.1  | 0.14 | 0.19 | 0.29 | 0.15 |
| chr2 | 151668501 | 151668782 | Rspo4         | ENSMUSG00000032852  | -22  | 0.07 | 0.19 | 0.09 | 0.16 | 0.14 | 0.15 |
| chr2 | 26483707  | 26484305  | Fam69b        | ENSMUSG00000036186  | 29   | 0.12 | 0.22 | 0.1  | 0.15 | 0.14 | 0.14 |
| chr2 | 31805629  | 31806120  | Aif1l         | ENSMUSG00000001864  | 94   | 0.08 | 0.16 | 0.08 | 0.17 | 0.11 | 0.14 |
| chr2 | 64860478  | 64861109  | Grb14         | ENSMUSG00000026888  | 46   | 0.11 | 0.14 | 0.09 | 0.13 | 0.09 | 0.09 |
| chr2 | 130522638 | 130523525 | Slc4a11       | ENSMUSG000000074796 | 124  | 0.08 | 0.13 | 0.12 | 0.2  | 0.09 | 0.14 |
| chr2 | 153271243 | 153271567 | 8430427H17Rik | ENSMUSG000000061411 | -88  | 0.15 | 0.18 | 0.15 | 0.14 | 0.09 | 0.21 |
| chr2 | 155554911 | 15555182  | Edem2         | ENSMUSG00000038312  | 165  | 0.25 | 0.25 | 0.07 | 0.2  | 0.13 | 0.16 |
| chr2 | 171867563 | 171868977 | Cbln4         | ENSMUSG00000067578  | 696  | 0.14 | 0.12 | 0.08 | 0.17 | 0.12 | 0.15 |
| chr2 | 32731842  | 32732087  | Fam129b       | ENSMUSG000000026796 | 330  | 0.2  | 0.14 | 0.1  | 0.18 | 0.13 | 0.06 |
| chr2 | 80155564  | 80156213  | Dnajc10       | ENSMUSG00000027006  | 265  | 0.06 | 0.07 | 0.08 | 0.08 | 0.07 | 0.13 |
| chr2 | 91805610  | 91805873  | Dgkz          | ENSMUSG00000040479  | 3    | 1    | 1    | 0.6  | 0.43 | 0.27 | 0.68 |
| chr2 | 102913535 | 102914097 | Pdhx          | ENSMUSG00000010914  | -197 | 0.15 | 0.06 | 0.14 | 0.25 | 0.07 | 0.2  |
| chr2 | 118502661 | 118503417 | Pak6          | ENSMUSG00000074923  | 74   | 0.1  | 0.1  | 0.18 | 0.12 | 0.12 | 0.15 |
| chr2 | 144156385 | 144157948 | Ovol2         | ENSMUSG00000037279  | -104 | 0.12 | 0.17 | 0.09 | 0.15 | 0.11 | 0.13 |
| chr2 | 145760100 | 145760825 | Crnk1         | ENSMUSG00000001767  | -12  | 0.18 | 0.09 | 0.14 | 0.17 | 0.13 | 0.14 |
| chr2 | 156960405 | 156961065 | Samhd1        | ENSMUSG00000027639  | -62  | 0.22 | 0.09 | 0.11 | 0.12 | 0.14 | 0.11 |
| chr2 | 25097593  | 25098029  | Rnf208        | ENSMUSG00000044628  | 36   | 0.17 | 0.1  | 0.13 | 0.11 | 0.11 | 0.08 |
| chr2 | 28980205  | 28981177  | Setx          | ENSMUSG00000043535  | 179  | 0.18 | 0.15 | 0.08 | 0.15 | 0.21 | 0.2  |
| chr2 | 91490084  | 91490578  | Arhgap1       | ENSMUSG00000027247  | 56   | 0.13 | 0.06 | 0.17 | 0.18 | 0.09 | 0.16 |
| chr2 | 102290439 | 102292015 | Fjx1          | ENSMUSG000000075012 | 722  | 0.16 | 0.18 | 0.11 | 0.16 | 0.15 | 0.18 |
| chr2 | 104250028 | 104251023 | D430041D05Rik | ENSMUSG000000068373 | -376 | 0.17 | 0.15 | 0.08 | 0.14 | 0.16 | 0.1  |
| chr2 | 124948884 | 124949567 | Myef2         | ENSMUSG00000027201  | -75  | 0.14 | 0.15 | 0.08 | 0.18 | 0.12 | 0.13 |
| chr2 | 174123964 | 174126145 | Gnas          | ENSMUSG00000027523  | 1694 | 0.43 | 0.42 | 0.43 | 0.46 | 0.44 | 0.45 |
| chr2 | 5765965   | 5766607   | Cdc123        | ENSMUSG00000039128  | -299 | 0.1  | 0.07 | 0.22 | 0.13 | 0.18 | 0.32 |

|      |           |           |               |                    |      |      |      |      |      |      |      |
|------|-----------|-----------|---------------|--------------------|------|------|------|------|------|------|------|
| chr2 | 34627063  | 34628258  | Hspa5         | ENSMUSG00000026864 | 170  | 0.16 | 0.37 | 0.12 | 0.2  | 0.2  | 0.19 |
| chr2 | 74587681  | 74588121  | 6720416L17Rik | ENSMUSG00000075277 | 662  | 0.13 | 0.14 | 0.2  | 0.18 | 0.1  | 0.19 |
| chr2 | 168581429 | 168581739 | Sall4         | ENSMUSG00000027547 | -141 | 0.87 | 0.75 | 0.82 | 1    | 1    | 1    |
| chr2 | 13995493  | 13996126  | 4921530L18Rik | ENSMUSG00000086657 | -248 | 0.09 | 0.15 | 0.08 | 0.24 | 0.15 | 0.18 |
| chr2 | 22750928  | 22751536  | Pdss1         | ENSMUSG00000026784 | 190  | 0.15 | 0.14 | 0.12 | 0.11 | 0.19 | 0.17 |
| chr2 | 123915637 | 123916101 | Sema6d        | ENSMUSG00000027200 | 164  | 0.14 | 0.06 | 0.18 | 0.1  | 0.1  | 0.1  |
| chr2 | 181335682 | 181336223 | Prpf6         | ENSMUSG00000002455 | -69  | 0.15 | 0.27 | 0.14 | 0.18 | 0.12 | 0.14 |
| chr2 | 105515345 | 105515762 | Pax6          | ENSMUSG00000027168 | 205  | 1    | NA   | 0.18 | 0.3  | 0.3  | 0.16 |
| chr2 | 121239254 | 121240192 | Catsper2      | ENSMUSG00000033486 | -378 | 0.13 | 0.13 | 0.11 | 0.13 | 0.12 | 0.11 |
| chr2 | 132088689 | 132089488 | Cds2          | ENSMUSG00000058793 | 204  | 0.1  | 0.11 | 0.11 | 0.17 | 0.08 | 0.15 |
| chr2 | 151931131 | 151931740 | Srxn1         | ENSMUSG00000032802 | 183  | 0.17 | 0.14 | 0.11 | 0.13 | 0.15 | 0.14 |
| chr2 | 31007674  | 31008177  | D330023K18Rik | ENSMUSG00000087269 | -114 | 0.16 | 0.04 | 0.19 | 0.17 | 0.21 | 0.13 |
| chr2 | 34228122  | 34228844  | Pbx3          | ENSMUSG00000038718 | 177  | 0.15 | 0.16 | 0.1  | 0.12 | 0.18 | 0.19 |
| chr2 | 60122033  | 60122326  | Cd302         | ENSMUSG00000060703 | 296  | 0.1  | 0.17 | 0.11 | 0.19 | 0.13 | 0.16 |
| chr2 | 90725801  | 90726239  | C1qtnf4       | ENSMUSG00000040794 | 77   | 0.08 | 0.31 | 0.2  | 0.17 | 0.1  | 0.18 |
| chr2 | 127366771 | 127367271 | Prom2         | ENSMUSG00000027376 | 100  | 0.23 | 0.31 | 0.26 | 0.34 | 0.2  | 0.27 |
| chr2 | 3200977   | 3202368   | Nmt2          | ENSMUSG00000026643 | 188  | 0.32 | 0.38 | 0.16 | 0.24 | 0.39 | 0.12 |
| chr2 | 31495552  | 31495872  | Prdm12        | ENSMUSG00000079466 | 155  | 0.25 | 0.17 | 0.1  | 0.24 | 0.12 | 0.15 |
| chr2 | 69660621  | 69661379  | Klhl23        | ENSMUSG00000042155 | 573  | 0.13 | 0.12 | 0.14 | 0.13 | 0.12 | 0.12 |
| chr2 | 127073220 | 127074455 | Ciao1         | ENSMUSG0000003662  | -481 | 0.15 | 0.28 | 0.13 | 0.2  | 0.12 | 0.14 |
| chr2 | 16277947  | 16278458  | Plxdc2        | ENSMUSG00000026748 | 271  | 0.36 | 0.29 | 0.17 | 0.23 | 0.44 | 0.2  |
| chr2 | 23427184  | 23427672  | Spopl         | ENSMUSG00000026771 | 70   | 0.15 | 0.18 | 0.11 | 0.24 | 0.08 | 0.14 |
| chr2 | 26057591  | 26058785  | Lhx3          | ENSMUSG00000026934 | 198  | 0.11 | 0.22 | 0.09 | 0.14 | 0.1  | 0.11 |
| chr2 | 30683272  | 30683992  | Asb6          | ENSMUSG00000039483 | 153  | 0.18 | 0.13 | 0.11 | 0.11 | 0.16 | 0.14 |
| chr2 | 91570248  | 91570581  | Ambra1        | ENSMUSG00000040506 | 123  | 0.12 | 0.28 | 0.14 | 0.17 | 0.09 | 0.17 |
| chr2 | 92755145  | 92755517  | Syt13         | ENSMUSG00000027220 | 76   | 0.08 | 0.1  | 0.1  | 0.12 | 0.16 | 0.32 |
| chr2 | 128792754 | 128793467 | Zc3h6         | ENSMUSG00000042851 | -28  | 0.14 | 0.22 | 0.25 | 0.15 | 0.17 | 0.19 |
| chr2 | 157853995 | 157854799 | Tti1          | ENSMUSG00000027650 | -228 | 0.11 | 0.2  | 0.1  | 0.16 | 0.13 | 0.16 |
| chr2 | 25251362  | 25251972  | Entpd2        | ENSMUSG00000015085 | 273  | 0.15 | 0.14 | 0.12 | 0.13 | 0.12 | 0.16 |
| chr2 | 32091849  | 32092378  | Gm13610       | ENSMUSG00000086216 | -211 | 0.09 | 0.12 | 0.1  | 0.11 | 0.1  | 0.12 |

|      |           |           |               |                    |       |      |      |      |      |      |      |
|------|-----------|-----------|---------------|--------------------|-------|------|------|------|------|------|------|
| chr2 | 51790230  | 51790590  | Rbm43         | ENSMUSG00000036249 | 117   | 0.15 | 0.22 | 0.1  | 0.3  | 0.12 | 0.15 |
| chr2 | 59720273  | 59720757  | Wdsub1        | ENSMUSG00000026988 | 89    | 0.09 | 0.32 | 0.13 | 0.15 | 0.11 | 0.11 |
| chr2 | 74529532  | 74529878  | Hoxd10        | ENSMUSG00000050368 | 558   | 0.5  | 0.28 | 0.13 | 0.4  | 0.28 | 0.28 |
| chr2 | 81893219  | 81893939  | Zfp804a       | ENSMUSG00000070866 | 200   | 0.11 | 0.16 | 0.08 | 0.13 | 0.12 | 0.09 |
| chr2 | 26235844  | 26236240  | Snappc4       | ENSMUSG00000036281 | 97    | 0.1  | 0.16 | 0.11 | 0.11 | 0.08 | 0.13 |
| chr2 | 163821017 | 163821469 | Ywhab         | ENSMUSG00000018326 | 4     | 0.25 | 0.24 | 0.13 | 0.25 | 0.14 | 0.2  |
| chr2 | 163899733 | 163900333 | Stk4          | ENSMUSG00000018209 | 159   | 0.2  | 0.18 | 0.09 | 0.13 | 0.22 | 0.13 |
| chr2 | 11698924  | 11699524  | Fbxo18        | ENSMUSG00000058594 | -90   | 0.16 | 0.7  | 0.07 | 0.17 | 0.13 | 0.16 |
| chr2 | 29744801  | 29746246  | Odf2          | ENSMUSG00000026790 | 283   | 0.1  | 0.2  | 0.13 | 0.16 | 0.08 | 0.12 |
| chr2 | 32143069  | 32144010  | Swi5          | ENSMUSG00000044627 | -84   | 0.22 | 0.08 | 0.17 | 0.21 | 0.26 | 0.13 |
| chr2 | 91096854  | 91097202  | Pacsin3       | ENSMUSG00000027257 | 58    | 1    | 1    | 0.1  | 0.18 | 0.63 | 0.16 |
| chr2 | 131855431 | 131855679 | Rassf2        | ENSMUSG00000027339 | 182   | 0.5  | 0.21 | 0.22 | 0.21 | 0.17 | 0.16 |
| chr2 | 164774694 | 164775337 | Mmp9          | ENSMUSG00000017737 | -1181 | 0.15 | 0.26 | 0.13 | 0.17 | 0.1  | 0.18 |
| chr2 | 166840690 | 166841063 | Ddx27         | ENSMUSG00000017999 | 183   | 0.3  | 0.19 | 0.12 | 0.25 | 0.26 | 0.32 |
| chr2 | 38860268  | 38860774  | Rpl35         | ENSMUSG00000062997 | 42    | 0.14 | 0.08 | 0.1  | 0.16 | 0.09 | 0.1  |
| chr2 | 69627484  | 69627952  | 4930578N16Rik | ENSMUSG00000070883 | -86   | 0.25 | 0.28 | 0.17 | 0.13 | 0.09 | 0.18 |
| chr2 | 130402224 | 130402706 | Oxt           | ENSMUSG00000027301 | 556   | 0.12 | 0.23 | 0.11 | 0.19 | 0.15 | 0.13 |
| chr2 | 158235365 | 158236220 | Ralgapb       | ENSMUSG00000027652 | 208   | 0.09 | 0.13 | 0.08 | 0.11 | 0.08 | 0.13 |
| chr2 | 166888017 | 166888780 | Znfx1         | ENSMUSG00000039501 | -259  | 0.13 | 0.12 | 0.08 | 0.11 | 0.14 | 0.11 |
| chr2 | 25220721  | 25221203  | Uap111        | ENSMUSG00000026956 | 173   | 0.11 | 0.25 | 0.08 | 0.19 | 0.23 | 0.15 |
| chr2 | 105843261 | 105843546 | Dnajc24       | ENSMUSG00000027166 | -44   | 1    | 1    | 0.11 | 0.2  | 0.37 | 0.15 |
| chr2 | 158435515 | 158435887 | Gm14204       | ENSMUSG00000086496 | 625   | 0.13 | 0.07 | 0.1  | 0.13 | 0.08 | 0.07 |
| chr2 | 180234585 | 180235016 | Ntsr1         | ENSMUSG00000027568 | 119   | 0.12 | 0.21 | 0.12 | 0.26 | 0.07 | 0.23 |
| chr2 | 101636563 | 101637815 | Prr5l         | ENSMUSG00000032841 | 618   | 0.43 | 0.45 | 0.13 | 0.15 | 0.51 | 0.19 |
| chr2 | 122060245 | 122060613 | Sord          | ENSMUSG00000027227 | -56   | 0.08 | 0.18 | 0.08 | 0.09 | 0.14 | 0.2  |
| chr2 | 167486796 | 167487407 | Gm20431       | ENSMUSG00000089739 | -105  | 0.12 | 0.13 | 0.14 | 0.15 | 0.1  | 0.15 |
| chr2 | 172196096 | 172196833 | Cstf1         | ENSMUSG00000027498 | 283   | 0.26 | 0.29 | 0.14 | 0.18 | 0.29 | 0.28 |
| chr2 | 172375068 | 172377333 | Tfap2c        | ENSMUSG00000028640 | 1107  | 0.13 | 0.12 | 0.12 | 0.2  | 0.14 | 0.19 |
| chr2 | 24830305  | 24831079  | Mrpl41        | ENSMUSG00000036850 | -74   | 0.27 | 0.28 | 0.13 | 0.3  | 0.19 | 0.14 |
| chr2 | 26061850  | 26062420  | Lhx3          | ENSMUSG00000026934 | -40   | 0.18 | 0.22 | 0.27 | 0.25 | 0.29 | 0.36 |

|      |           |           |               |                    |      |      |      |      |      |      |      |
|------|-----------|-----------|---------------|--------------------|------|------|------|------|------|------|------|
| chr2 | 29933091  | 29933495  | Pkn3          | ENSMUSG00000026785 | 89   | 0.24 | 0.18 | 0.12 | 0.19 | 0.21 | 0.14 |
| chr2 | 154384451 | 154384695 | Necab3        | ENSMUSG00000027489 | 7    | 0.33 | NA   | 0.12 | 0.26 | 0.2  | 0.24 |
| chr2 | 172764430 | 172766164 | Bmp7          | ENSMUSG00000008999 | 296  | 0.32 | 0.38 | 0.12 | 0.21 | 0.29 | 0.16 |
| chr2 | 180007774 | 180008052 | Cables2       | ENSMUSG00000038990 | 238  | 0.14 | 0.1  | 0.1  | 0.14 | 0.16 | 0.14 |
| chr2 | 164311467 | 164312610 | Dbndd2        | ENSMUSG00000017734 | 432  | 0.22 | 0.62 | 0.14 | 0.14 | 0.26 | 0.16 |
| chr2 | 172847157 | 172847938 | Rbm38         | ENSMUSG00000027510 | 147  | 0.09 | 0.15 | 0.09 | 0.11 | 0.07 | 0.13 |
| chr2 | 30700728  | 30701259  | Prrx2         | ENSMUSG00000039476 | 29   | 0.13 | 0.09 | 0.11 | 0.16 | 0.12 | 0.17 |
| chr2 | 31325517  | 31325846  | Ass1          | ENSMUSG00000076441 | -46  | 0.4  | 0.17 | 0.11 | 0.26 | 0.24 | 0.19 |
| chr2 | 34726298  | 34726878  | Psm5          | ENSMUSG00000026869 | -135 | 0.33 | 0.08 | 0.06 | 0.22 | 0.08 | 0.17 |
| chr2 | 50151925  | 50152305  | Mmadhc        | ENSMUSG00000026766 | -172 | 0.12 | NA   | 0.12 | 0.21 | 0.17 | 0.15 |
| chr2 | 65076123  | 65077290  | Cobll1        | ENSMUSG00000034903 | -175 | 0.15 | 0.23 | 0.09 | 0.15 | 0.16 | 0.1  |
| chr2 | 105514828 | 105515050 | Pax6          | ENSMUSG00000027168 | -327 | 0.11 | 0.22 | 0.2  | 0.13 | 0.22 | 0.17 |
| chr2 | 152239597 | 152240763 | Zcchc3        | ENSMUSG00000074682 | 600  | 0.1  | 0.07 | 0.1  | 0.17 | 0.11 | 0.15 |
| chr2 | 156903975 | 156905604 | 9830001H06Rik | ENSMUSG00000055485 | 201  | 0.12 | 0.27 | 0.08 | 0.12 | 0.13 | 0.11 |
| chr2 | 180689112 | 180689346 | Gm14341       | ENSMUSG00000087293 | 60   | 0.11 | 0.06 | 0.04 | 0.1  | 0.09 | 0.06 |
| chr2 | 181327036 | 181327653 | Znf512b       | ENSMUSG00000000823 | -178 | 0.13 | 0.23 | 0.1  | 0.25 | 0.11 | 0.14 |
| chr2 | 26170921  | 26171416  | Gpsm1         | ENSMUSG00000026930 | 133  | 0.11 | 0.1  | 0.06 | 0.14 | 0.09 | 0.12 |
| chr2 | 30092679  | 30093733  | Lrrc8a        | ENSMUSG00000007476 | -29  | 0.13 | 0.18 | 0.09 | 0.13 | 0.15 | 0.15 |
| chr2 | 30247607  | 30248407  | Dolpp1        | ENSMUSG00000026856 | 233  | 0.23 | 0.41 | 0.09 | 0.22 | 0.27 | 0.13 |
| chr2 | 104968202 | 104968614 | Wt1           | ENSMUSG00000016458 | 1041 | 0.33 | 0.6  | 0.5  | 0.37 | 0.24 | 0.21 |
| chr2 | 130223149 | 130223597 | Cpxm1         | ENSMUSG00000027408 | -63  | 0.33 | 0.31 | 0.08 | 0.16 | 0.11 | 0.14 |
| chr2 | 130455286 | 130455816 | Ubox5         | ENSMUSG00000027300 | 212  | 0.12 | 0.23 | 0.1  | 0.15 | 0.11 | 0.15 |
| chr2 | 3249531   | 3250027   | Rpp38         | ENSMUSG00000049950 | 136  | 0.12 | NA   | 0.12 | 0.16 | 0.06 | 0.12 |
| chr2 | 113598635 | 113598984 | Grem1         | ENSMUSG00000074934 | -6   | 0.2  | 0.15 | 0.11 | 0.09 | 0.16 | 0.13 |
| chr2 | 10296416  | 10296894  | Gm13261       | ENSMUSG00000086748 | -987 | 0.5  | NA   | 0.18 | 0.48 | 0.18 | 0.32 |
| chr2 | 25145751  | 25146394  | Lrrc26        | ENSMUSG00000026961 | 637  | 0.16 | 0.24 | 0.1  | 0.14 | 0.18 | 0.15 |
| chr2 | 12109762  | 121097287 | Trp53bp1      | ENSMUSG00000043909 | 33   | 0.1  | 0.12 | 0.1  | 0.16 | 0.11 | 0.14 |
| chr2 | 154482905 | 154483252 | Chmp4b        | ENSMUSG00000038467 | 324  | 0.14 | 0.67 | 0.09 | 0.25 | 0.25 | 0.2  |
| chr2 | 167246825 | 167247482 | Slc9a8        | ENSMUSG00000039463 | -59  | 0.26 | 0.08 | 0.09 | 0.21 | 0.22 | 0.1  |
| chr2 | 167317857 | 167318667 | Rnf114        | ENSMUSG00000006418 | 117  | 0.12 | 0.17 | 0.12 | 0.18 | 0.11 | 0.19 |

|      |           |           |               |                    |      |      |      |      |      |      |      |
|------|-----------|-----------|---------------|--------------------|------|------|------|------|------|------|------|
| chr2 | 25876949  | 25877434  | Ubac1         | ENSMUSG00000036352 | -139 | 0.16 | 0.15 | 0.14 | 0.21 | 0.17 | 0.15 |
| chr2 | 103867854 | 103868612 | Fbxo3         | ENSMUSG00000027180 | 355  | 0.25 | 0.17 | 0.11 | 0.16 | 0.28 | 0.15 |
| chr2 | 155644656 | 155645025 | BC029722      | ENSMUSG00000074649 | 322  | 0.07 | 0.07 | 0.07 | 0.07 | 0.1  | 0.08 |
| chr2 | 18593637  | 18594417  | Commd3        | ENSMUSG00000051154 | 16   | 0.07 | 0.11 | 0.13 | 0.09 | 0.09 | 0.14 |
| chr2 | 25118083  | 25118966  | Tprn          | ENSMUSG00000048707 | 406  | 0.33 | 0.29 | 0.13 | 0.26 | 0.31 | 0.14 |
| chr2 | 31526206  | 31526563  | Exosc2        | ENSMUSG00000039356 | 149  | 0.1  | 0.56 | 0.1  | 0.18 | 0.08 | 0.18 |
| chr2 | 79095559  | 79096054  | Itga4         | ENSMUSG00000027009 | 223  | 0.07 | 0.16 | 0.09 | 0.13 | 0.08 | 0.16 |
| chr2 | 90744527  | 90745268  | Ndufs3        | ENSMUSG0000005510  | -98  | 0.14 | 0.16 | 0.14 | 0.15 | 0.12 | 0.16 |
| chr2 | 127614389 | 127614710 | Nphp1         | ENSMUSG00000027378 | 41   | 0.19 | 0.17 | 0.14 | 0.09 | 0.22 | 0.09 |
| chr2 | 144381945 | 144382310 | Sec23b        | ENSMUSG00000027429 | 162  | 0.09 | 0.13 | 0.13 | 0.19 | 0.07 | 0.12 |
| chr2 | 156817428 | 156817884 | Ndr3          | ENSMUSG00000027634 | 7    | 0.04 | 0.09 | 0.08 | 0.08 | 0.06 | 0.15 |
| chr2 | 121692484 | 121693368 | Casc4         | ENSMUSG00000060227 | 220  | 0.1  | 0.14 | 0.1  | 0.14 | 0.1  | 0.11 |
| chr2 | 132073263 | 132073593 | 5730494N06Rik | ENSMUSG00000027341 | -38  | 0.12 | 0.31 | 0.11 | 0.22 | 0.11 | 0.12 |
| chr2 | 151457763 | 151458175 | Snph          | ENSMUSG00000027457 | 238  | 0.08 | 0.06 | 0.13 | 0.15 | 0.05 | 0.1  |
| chr2 | 158492806 | 158493787 | Ppp1r16b      | ENSMUSG00000037754 | 441  | 0.12 | 0.07 | 0.08 | 0.18 | 0.11 | 0.15 |
| chr2 | 31742692  | 31743152  | Lamc3         | ENSMUSG00000026840 | 111  | 0.12 | 0.09 | 0.11 | 0.18 | 0.14 | 0.2  |
| chr2 | 69485182  | 69485519  | Bbs5          | ENSMUSG00000063145 | 122  | 0.33 | 0.78 | 0.18 | 0.42 | 0.43 | 0.19 |
| chr2 | 120675651 | 120676610 | Cdan1         | ENSMUSG00000027284 | -266 | 0.25 | 0.28 | 0.1  | 0.16 | 0.1  | 0.13 |
| chr2 | 151368108 | 151368942 | Fkbp1a        | ENSMUSG00000032966 | 306  | 0.14 | 0.1  | 0.09 | 0.17 | 0.16 | 0.11 |
| chr2 | 3630635   | 3631071   | Fam107b       | ENSMUSG00000026655 | 123  | 0.14 | 0.25 | 0.13 | 0.13 | 0.16 | 0.14 |
| chr2 | 74505832  | 74506907  | Hoxd13        | ENSMUSG0000001819  | 2    | 0.08 | 0.06 | 0.1  | 0.14 | 0.09 | 0.16 |
| chr2 | 74578544  | 74578759  | Hoxd3         | ENSMUSG00000079277 | 975  | 0.06 | 0.06 | 0.12 | 0.15 | 0.08 | 0.13 |
| chr2 | 103406308 | 103407579 | Abtb2         | ENSMUSG00000032724 | 476  | 0.18 | 0.24 | 0.11 | 0.17 | 0.16 | 0.12 |
| chr2 | 152119445 | 152120039 | Tbc1d20       | ENSMUSG00000027465 | 178  | 0.17 | 0.12 | 0.13 | 0.17 | 0.14 | 0.16 |
| chr2 | 154717968 | 154718771 | Eif2s2        | ENSMUSG00000074656 | 149  | 0.43 | 0.42 | 0.18 | 0.23 | 0.41 | 0.2  |
| chr2 | 158450573 | 158451291 | Actr5         | ENSMUSG00000037761 | 308  | 0.09 | 0.15 | 0.08 | 0.11 | 0.08 | 0.12 |
| chr2 | 163484043 | 163484582 | Pkig          | ENSMUSG00000035268 | 190  | 0.09 | 0.11 | 0.09 | 0.08 | 0.1  | 0.17 |
| chr2 | 20441142  | 20441622  | Etl4          | ENSMUSG00000036617 | 149  | 0.27 | 0.31 | 0.14 | 0.18 | 0.21 | 0.17 |
| chr2 | 25258547  | 25258991  | Npdc1         | ENSMUSG00000015094 | 178  | 0.15 | 0.2  | 0.12 | 0.16 | 0.14 | 0.11 |
| chr2 | 30650136  | 30650496  | 1700001O22Rik | ENSMUSG00000044320 | 1868 | 0.13 | 0.12 | 0.16 | 0.08 | 0.15 | 0.11 |

|      |           |           |               |                    |      |      |      |      |      |      |      |
|------|-----------|-----------|---------------|--------------------|------|------|------|------|------|------|------|
| chr2 | 147013776 | 147014037 | 6430503K07Rik | ENSMUSG00000053545 | 746  | 0.75 | 0.5  | 0.15 | 0.16 | 1    | 0.26 |
| chr2 | 153066812 | 153067537 | Plagl2        | ENSMUSG00000051413 | -79  | 0.2  | 0.24 | 0.09 | 0.15 | 0.18 | 0.1  |
| chr2 | 155890914 | 155891649 | Spag4         | ENSMUSG00000038180 | 347  | 0.16 | 0.38 | 0.13 | 0.13 | 0.14 | 0.11 |
| chr2 | 167174398 | 167175351 | B4galt5       | ENSMUSG00000017929 | -191 | 0.11 | 0.16 | 0.12 | 0.12 | 0.12 | 0.12 |
| chr2 | 29904138  | 29904773  | Wdr34         | ENSMUSG00000039715 | -74  | 0.11 | 0.16 | 0.1  | 0.15 | 0.04 | 0.08 |
| chr2 | 72123671  | 72124361  | B230120H23Rik | ENSMUSG00000004085 | 322  | 0.21 | 0.38 | 0.12 | 0.13 | 0.2  | 0.16 |
| chr2 | 174122763 | 174123033 | Gnas          | ENSMUSG00000027523 | -462 | 0.56 | 0.6  | 0.31 | 0.37 | 0.5  | 0.51 |
| chr2 | 17978039  | 17979581  | 1810059C17Rik | ENSMUSG00000086340 | -570 | 0.17 | 0.45 | 0.15 | 0.12 | 0.16 | 0.17 |
| chr2 | 130004484 | 130005165 | Snrpb         | ENSMUSG00000027404 | 215  | 0.11 | 0.13 | 0.12 | 0.1  | 0.1  | 0.11 |
| chr2 | 132641578 | 132642149 | Trmt6         | ENSMUSG00000037376 | -114 | 0.2  | 0.12 | 0.11 | 0.13 | 0.21 | 0.17 |
| chr2 | 136716706 | 136717042 | Mkks          | ENSMUSG00000027274 | 16   | 0.1  | NA   | 0.09 | 0.15 | 0.12 | 0.1  |
| chr2 | 165979759 | 165981088 | Sulf2         | ENSMUSG00000006800 | -500 | 0.1  | 0.09 | 0.1  | 0.15 | 0.1  | 0.15 |
| chr2 | 19352456  | 19352956  | Gm13344       | ENSMUSG00000087103 | 904  | 0.2  | 0.23 | 0.18 | 0.08 | 0.08 | 0.19 |
| chr2 | 71291198  | 71291574  | Metap1d       | ENSMUSG00000041921 | 53   | 0.09 | NA   | 0.08 | 0.16 | 0.13 | 0.17 |
| chr2 | 125684392 | 125684983 | Cops2         | ENSMUSG00000027206 | 45   | 0.07 | 0.07 | 0.12 | 0.11 | 0.07 | 0.12 |
| chr2 | 167906020 | 167907059 | Pard6b        | ENSMUSG00000044641 | 35   | 0.13 | 0.14 | 0.11 | 0.12 | 0.14 | 0.16 |
| chr2 | 181404996 | 181406436 | Sox18         | ENSMUSG00000046470 | 629  | 0.1  | 0.18 | 0.13 | 0.25 | 0.09 | 0.15 |
| chr2 | 13495974  | 13496640  | Vim           | ENSMUSG00000026728 | 358  | 0.14 | 0.18 | 0.08 | 0.16 | 0.12 | 0.14 |
| chr2 | 90585441  | 90586245  | Fnbp4         | ENSMUSG00000008200 | 316  | 0.13 | 0.17 | 0.1  | 0.18 | 0.13 | 0.12 |
| chr2 | 102240594 | 102241418 | Trim44        | ENSMUSG00000027189 | 51   | 0.11 | 0.09 | 0.09 | 0.08 | 0.1  | 0.12 |
| chr2 | 121180776 | 121181170 | Ppip5k1       | ENSMUSG00000033526 | -165 | 0.17 | 0.2  | 0.12 | 0.18 | 0.16 | 0.13 |
| chr2 | 164268589 | 164268869 | Sdc4          | ENSMUSG00000017009 | -43  | 0.14 | 0.22 | 0.11 | 0.14 | 0.11 | 0.09 |
| chr2 | 17949010  | 17950640  | A930004D18Rik | ENSMUSG00000054057 | 562  | 0.15 | 0.18 | 0.16 | 0.18 | 0.2  | 0.2  |
| chr2 | 28388956  | 28389246  | Ralgds        | ENSMUSG00000026821 | 39   | 0.16 | 0.16 | 0.09 | 0.1  | 0.17 | 0.11 |
| chr2 | 29979766  | 29980177  | Zer1          | ENSMUSG00000039686 | 3    | 0.12 | 0.27 | 0.11 | 0.13 | 0.1  | 0.1  |
| chr2 | 32208363  | 32208978  | Dnm1          | ENSMUSG00000026825 | 97   | 0.09 | 0.15 | 0.09 | 0.19 | 0.08 | 0.13 |
| chr2 | 76485622  | 76486516  | Prkra         | ENSMUSG00000002731 | 3    | 0.14 | 0.21 | 0.15 | 0.16 | 0.13 | 0.12 |
| chr2 | 150834609 | 150835215 | Ninl          | ENSMUSG00000068115 | 156  | 0.12 | 0.14 | 0.09 | 0.14 | 0.1  | 0.18 |
| chr2 | 174241309 | 174241636 | Th1l          | ENSMUSG00000016253 | 120  | 0.12 | 0.1  | 0.1  | 0.13 | 0.1  | 0.17 |
| chr2 | 5634788   | 5636314   | Camk1d        | ENSMUSG00000039145 | -268 | 0.1  | 0.14 | 0.11 | 0.14 | 0.1  | 0.17 |

|      |          |          |               |                    |      |      |      |      |      |      |      |
|------|----------|----------|---------------|--------------------|------|------|------|------|------|------|------|
| chr2 | 3035480  | 3036135  | Fam171a1      | ENSMUSG00000050530 | 153  | 0.13 | 0.17 | 0.07 | 0.14 | 0.13 | 0.13 |
| chr2 | 4322199  | 4322680  | Frmd4a        | ENSMUSG00000026657 | -44  | 0.19 | 0.11 | 0.09 | 0.15 | 0.17 | 0.19 |
| chr2 | 4933592  | 4933850  | Mcm10         | ENSMUSG00000026669 | 40   | 0.22 | 0.17 | 0.1  | 0.12 | 0.24 | 0.25 |
| chr2 | 5816052  | 5816584  | Sec61a2       | ENSMUSG00000025816 | 47   | 0.14 | 0.23 | 0.15 | 0.13 | 0.14 | 0.07 |
| chr2 | 10001684 | 10002508 | Atp5c1        | ENSMUSG00000025781 | -293 | 0.17 | 0.12 | 0.12 | 0.16 | 0.16 | 0.14 |
| chr2 | 12933114 | 12933325 | C1q3          | ENSMUSG00000049630 | 155  | 0.33 | NA   | 0.07 | 0.19 | 0.2  | 0.14 |
| chr2 | 17652463 | 17653065 | Nebi          | ENSMUSG00000053702 | -94  | 0.07 | 0.1  | 0.12 | 0.15 | 0.07 | 0.09 |
| chr2 | 17953242 | 17953810 | Gm13330       | ENSMUSG00000085319 | -634 | 0.09 | 0.07 | 0.43 | 0.35 | 0.09 | 0.33 |
| chr2 | 22895014 | 22895699 | Abi1          | ENSMUSG00000058835 | 268  | 0.16 | 0.43 | 0.1  | 0.19 | 0.18 | 0.17 |
| chr2 | 25096288 | 25096553 | 2310002J15Rik | ENSMUSG00000036731 | -912 | 0.5  | 1    | 0.29 | 0.18 | 0.25 | 0.2  |
| chr2 | 25127459 | 25128015 | Ssna1         | ENSMUSG00000026966 | 187  | 0.12 | 0.57 | 0.09 | 0.21 | 0.1  | 0.1  |
| chr2 | 25402082 | 25402643 | Traf2         | ENSMUSG00000026942 | 68   | 0.16 | 0.21 | 0.08 | 0.13 | 0.14 | 0.1  |
| chr2 | 25733321 | 25733616 | Kcnt1         | ENSMUSG00000058740 | 91   | 0.06 | 0.08 | 0.09 | 0.09 | 0.03 | 0.09 |
| chr2 | 26459290 | 26459723 | Agpat2        | ENSMUSG00000026922 | -60  | 0.08 | 0.06 | 0.05 | 0.19 | 0.1  | 0.12 |
| chr2 | 26788475 | 26789375 | Surf4         | ENSMUSG00000014867 | -22  | 0.5  | 0.2  | 0.15 | 0.46 | 1    | 0.16 |
| chr2 | 26997587 | 26998116 | Fam163b       | ENSMUSG00000009216 | 160  | 0.09 | 0.06 | 0.07 | 0.16 | 0.1  | 0.13 |
| chr2 | 28555599 | 28555841 | Ak8           | ENSMUSG00000026807 | 36   | 0.12 | 0.07 | 0.12 | 0.15 | 0.13 | 0.15 |
| chr2 | 28915663 | 28916275 | Ttf1          | ENSMUSG00000026803 | 187  | 0.16 | 0.14 | 0.11 | 0.17 | 0.16 | 0.18 |
| chr2 | 29682756 | 29683303 | Urm1          | ENSMUSG00000069020 | 167  | 0.07 | 0.14 | 0.09 | 0.19 | 0.11 | 0.22 |
| chr2 | 30033748 | 30034154 | D2Wsu81e      | ENSMUSG00000039660 | -2   | 0.12 | 0.1  | 0.11 | 0.19 | 0.12 | 0.25 |
| chr2 | 30219613 | 30220078 | Fam73b        | ENSMUSG00000026858 | 92   | 0.08 | 0.07 | 0.1  | 0.14 | 0.05 | 0.16 |
| chr2 | 30808440 | 30808935 | Tor1b         | ENSMUSG00000026848 | 208  | 0.06 | 0.14 | 0.06 | 0.13 | 0.06 | 0.14 |
| chr2 | 31496678 | 31496959 | Gm13425       | ENSMUSG00000085224 | -709 | 0.25 | 0.09 | 0.13 | 0.1  | 0.13 | 0.16 |
| chr2 | 32069253 | 32069665 | Prrc2b        | ENSMUSG00000039262 | 1741 | 1    | 1    | 0.27 | 0.33 | 0.91 | 0.6  |
| chr2 | 32115349 | 32115662 | Uck1          | ENSMUSG0000002550  | 76   | 0.14 | 0.18 | 0.09 | 0.09 | 0.14 | 0.09 |
| chr2 | 32612583 | 32613026 | Tor2a         | ENSMUSG00000009563 | 50   | 0.16 | 0.15 | 0.1  | 0.15 | 0.16 | 0.15 |
| chr2 | 32631052 | 32631470 | Ttc16         | ENSMUSG00000039021 | -157 | 0.21 | 0.27 | 0.09 | 0.18 | 0.23 | 0.24 |
| chr2 | 32701686 | 32702044 | Gm13524       | ENSMUSG00000085397 | 159  | 0.75 | 0.67 | 0.09 | 0.25 | 0.64 | 0.25 |
| chr2 | 33323628 | 33324242 | Zbtb43        | ENSMUSG00000026788 | 90   | 0.25 | 0.2  | 0.07 | 0.17 | 0.24 | 0.1  |
| chr2 | 33486973 | 33487426 | Lmx1b         | ENSMUSG00000038765 | 588  | 0.14 | 0.14 | 0.13 | 0.21 | 0.15 | 0.13 |



|      |           |           |               |                    |      |      |      |      |      |      |      |
|------|-----------|-----------|---------------|--------------------|------|------|------|------|------|------|------|
| chr2 | 34681411  | 34681812  | Fbxw2         | ENSMUSG00000035949 | -69  | 0.12 | 0.08 | 0.09 | 0.11 | 0.11 | 0.12 |
| chr2 | 34768773  | 34769016  | Gm13448       | ENSMUSG00000086001 | 503  | 0.13 | 0.14 | 0.1  | 0.15 | 0.11 | 0.13 |
| chr2 | 35958921  | 35959583  | Lhx6          | ENSMUSG00000026890 | -140 | 0.29 | 0.32 | 0.11 | 0.21 | 0.33 | 0.16 |
| chr2 | 35960083  | 35960795  | Lhx6          | ENSMUSG00000026890 | -28  | 0.22 | 0.19 | 0.11 | 0.18 | 0.17 | 0.22 |
| chr2 | 37298493  | 37299013  | Zbtb26        | ENSMUSG00000050714 | -113 | 0.12 | 0.15 | 0.1  | 0.22 | 0.13 | 0.19 |
| chr2 | 38194882  | 38195411  | Lhx2          | ENSMUSG00000000247 | 138  | 0.12 | 0.28 | 0.1  | 0.12 | 0.11 | 0.15 |
| chr2 | 38499189  | 38499533  | Psemb7        | ENSMUSG00000026750 | 48   | 0.15 | 0.23 | 0.12 | 0.2  | 0.16 | 0.15 |
| chr2 | 38863373  | 38863901  | Arpc5l        | ENSMUSG00000026755 | 41   | 0.1  | 0.15 | 0.11 | 0.19 | 0.09 | 0.14 |
| chr2 | 51828264  | 51828515  | Nmi           | ENSMUSG00000026946 | 101  | 0.25 | 0.2  | 0.08 | 0.09 | 0.14 | 0.09 |
| chr2 | 63936334  | 63936693  | Fign          | ENSMUSG00000075324 | -418 | 0.09 | 0.14 | 0.1  | 0.11 | 0.09 | 0.12 |
| chr2 | 68699345  | 68700353  | Lass6         | ENSMUSG00000027035 | 351  | 0.08 | 0.07 | 0.1  | 0.15 | 0.1  | 0.15 |
| chr2 | 69699535  | 69700209  | Ssb           | ENSMUSG00000068882 | 253  | 0.13 | 0.13 | 0.1  | 0.12 | 0.13 | 0.07 |
| chr2 | 70400101  | 70402064  | Gad1          | ENSMUSG00000070880 | 862  | 0.19 | 0.25 | 0.09 | 0.18 | 0.18 | 0.17 |
| chr2 | 74530582  | 74530878  | Hoxd10        | ENSMUSG00000050368 | 1583 | 0.11 | 0.12 | 0.13 | 0.1  | 0.09 | 0.12 |
| chr2 | 83564392  | 83565201  | Itgav         | ENSMUSG00000027087 | 242  | 0.13 | 0.27 | 0.1  | 0.13 | 0.13 | 0.1  |
| chr2 | 83652693  | 83653017  | Fam171b       | ENSMUSG00000048388 | 62   | 0.08 | 0.08 | 0.06 | 0.09 | 0.07 | 0.13 |
| chr2 | 84518566  | 84518778  | Med19         | ENSMUSG00000027080 | 113  | 0.27 | NA   | 0.14 | 0.37 | 0.28 | 0.32 |
| chr2 | 90757574  | 90758184  | Ptpmt1        | ENSMUSG00000063235 | -126 | 0.13 | 0.28 | 0.13 | 0.15 | 0.12 | 0.14 |
| chr2 | 90780696  | 90781388  | Celf1         | ENSMUSG00000005506 | 342  | 0.11 | 0.19 | 0.08 | 0.14 | 0.1  | 0.16 |
| chr2 | 91042850  | 91043063  | Gm13783       | ENSMUSG00000086206 | -21  | 0.12 | 0.12 | 0.15 | 0.26 | 0.13 | 0.36 |
| chr2 | 91095889  | 91096171  | Pacsin3       | ENSMUSG00000027257 | -81  | 0.1  | 0.1  | 0.09 | 0.11 | 0.07 | 0.17 |
| chr2 | 91366828  | 91367377  | Ckap5         | ENSMUSG00000040549 | 183  | 0.13 | 0.15 | 0.1  | 0.16 | 0.12 | 0.1  |
| chr2 | 91762785  | 91762987  | Chrm4         | ENSMUSG00000040495 | 540  | 0.2  | 0.14 | 0.12 | 0.29 | 0.19 | 0.19 |
| chr2 | 91763848  | 91764216  | Chrm4         | ENSMUSG00000040495 | 1686 | 0.13 | 0.16 | 0.21 | 0.26 | 0.16 | 0.25 |
| chr2 | 91815629  | 91816378  | Dgkz          | ENSMUSG00000040479 | 18   | 0.1  | 0.23 | 0.12 | 0.19 | 0.1  | 0.11 |
| chr2 | 92215524  | 92215809  | Pex16         | ENSMUSG00000027222 | 16   | 0.07 | 0.05 | 0.07 | 0.19 | 0.05 | 0.12 |
| chr2 | 93662453  | 93662797  | Ext2          | ENSMUSG00000027198 | 77   | 0.1  | 0.13 | 0.1  | 0.19 | 0.09 | 0.12 |
| chr2 | 93850626  | 93851061  | Alkbh3        | ENSMUSG00000040174 | 44   | 0.1  | 0.18 | 0.08 | 0.12 | 0.1  | 0.15 |
| chr2 | 103810305 | 103811070 | Lmo2          | ENSMUSG00000032698 | 307  | 0.17 | 0.22 | 0.16 | 0.24 | 0.17 | 0.14 |
| chr2 | 105064484 | 105064725 | 0610012H03Rik | ENSMUSG00000055312 | 105  | 0.05 | 0.16 | 0.12 | 0.2  | 0.05 | 0.11 |

|      |           |           |            |                    |      |      |      |      |      |      |      |
|------|-----------|-----------|------------|--------------------|------|------|------|------|------|------|------|
| chr2 | 105509637 | 105509937 | Pax6os1    | ENSMUSG00000086029 | 650  | 0.2  | 0.13 | 0.1  | 0.24 | 0.2  | 0.13 |
| chr2 | 105744478 | 105745001 | Elp4       | ENSMUSG00000027167 | -99  | 0.11 | 0.14 | 0.08 | 0.11 | 0.08 | 0.11 |
| chr2 | 109533623 | 109534364 | Bdnf       | ENSMUSG00000048482 | 273  | 0.11 | 0.14 | 0.13 | 0.14 | 0.09 | 0.12 |
| chr2 | 112105635 | 112106243 | Slc12a6    | ENSMUSG00000027130 | -43  | 0.1  | 0.12 | 0.08 | 0.13 | 0.1  | 0.15 |
| chr2 | 113057122 | 113057578 | Ryr3       | ENSMUSG00000057378 | -147 | 1    | 1    | 0.62 | 1    | 1    | 0.37 |
| chr2 | 118639819 | 118640318 | D2Ertd750e | ENSMUSG00000027331 | 100  | 0.06 | 0.18 | 0.09 | 0.13 | 0.07 | 0.12 |
| chr2 | 118860518 | 118861169 | Rpusd2     | ENSMUSG00000027324 | 317  | 0.14 | 0.18 | 0.11 | 0.19 | 0.13 | 0.16 |
| chr2 | 119096677 | 119096969 | Rhov       | ENSMUSG00000034226 | 185  | 0.14 | 0.13 | 0.09 | 0.23 | 0.15 | 0.17 |
| chr2 | 119176671 | 119177329 | Chac1      | ENSMUSG00000027313 | 35   | 0.2  | 0.18 | 0.17 | 0.14 | 0.2  | 0.24 |
| chr2 | 119302632 | 119304002 | Ino80      | ENSMUSG00000034154 | 32   | 1    | 0.2  | 0.11 | 0.17 | 1    | 0.21 |
| chr2 | 119373207 | 119373724 | Exd1       | ENSMUSG00000048647 | -102 | 0.15 | 0.14 | 0.12 | 0.14 | 0.17 | 0.16 |
| chr2 | 119798042 | 119798380 | Mapkbp1    | ENSMUSG00000033902 | -224 | 0.33 | 0.5  | 0.16 | NA   | 0.17 | 0.18 |
| chr2 | 120389209 | 120389606 | Zfp106     | ENSMUSG00000027288 | 136  | 1    | NA   | 0.8  | 0.31 | 1    | NA   |
| chr2 | 120796257 | 120796528 | Ubr1       | ENSMUSG00000027272 | -43  | 0.24 | 0.44 | 0.17 | 0.17 | 0.25 | 0.09 |
| chr2 | 120802919 | 120803385 | Tmem62     | ENSMUSG00000054484 | -117 | 0.1  | 0.08 | 0.11 | 0.15 | 0.1  | 0.14 |
| chr2 | 121115213 | 121115591 | Mtap1a     | ENSMUSG00000027254 | 66   | 0.11 | 0.13 | 0.11 | 0.13 | 0.08 | 0.14 |
| chr2 | 121632056 | 121633002 | Frdm5      | ENSMUSG00000027238 | 79   | 0.13 | 0.25 | 0.13 | 0.2  | 0.13 | 0.12 |
| chr2 | 121943903 | 121944207 | Spg11      | ENSMUSG00000033396 | -23  | 0.23 | 0.33 | 0.09 | 0.11 | 0.25 | 0.07 |
| chr2 | 125331183 | 125332229 | Fbn1       | ENSMUSG00000027204 | 102  | 0.14 | 0.12 | 0.13 | 0.14 | 0.14 | 0.16 |
| chr2 | 128769297 | 128769910 | Zc3h8      | ENSMUSG00000027387 | 99   | 0.12 | 0.24 | 0.2  | 0.22 | 0.12 | 0.09 |
| chr2 | 129122714 | 129123032 | Ckap2l     | ENSMUSG00000048327 | 75   | 0.11 | 0.18 | 0.1  | 0.21 | 0.17 | 0.14 |
| chr2 | 130109855 | 130110277 | Idh3b      | ENSMUSG00000027406 | 85   | 0.25 | 0.17 | 0.17 | NA   | 0.13 | 0.22 |
| chr2 | 130120474 | 130120790 | Ebf4       | ENSMUSG00000053552 | -273 | 0.06 | NA   | 0.1  | 0.12 | 0.08 | 0.06 |
| chr2 | 130406392 | 130406982 | Avp        | ENSMUSG00000037727 | 1603 | 0.1  | 0.27 | 0.1  | 0.19 | 0.07 | 0.16 |
| chr2 | 131059731 | 131060244 | Mavs       | ENSMUSG00000037523 | 188  | 0.08 | 0.06 | 0.14 | 0.19 | 0.1  | 0.14 |
| chr2 | 132210812 | 132211239 | Prokr2     | ENSMUSG00000050558 | 111  | 0.27 | 0.19 | 0.14 | 0.18 | 0.26 | 0.23 |
| chr2 | 136940269 | 136940592 | Jag1       | ENSMUSG00000027276 | 1950 | 0.33 | 0.9  | 0.12 | 0.17 | 0.18 | 0.1  |
| chr2 | 144425641 | 144425994 | Dtd1       | ENSMUSG00000027430 | 184  | 0.15 | 0.12 | 0.14 | 0.12 | 0.25 | 0.13 |
| chr2 | 145500665 | 145501111 | BC039771   | ENSMUSG00000087594 | -215 | 0.14 | NA   | 0.12 | 0.16 | 0.13 | 0.18 |
| chr2 | 146337462 | 146338096 | Ralgapa2   | ENSMUSG00000037110 | -144 | 0.17 | 0.16 | 0.12 | 0.2  | 0.18 | 0.14 |

|      |           |           |               |                    |       |      |      |      |      |      |      |
|------|-----------|-----------|---------------|--------------------|-------|------|------|------|------|------|------|
| chr2 | 146681503 | 146681888 | Plk1s1        | ENSMUSG00000074749 | 95    | 0.1  | NA   | NA   | NA   | 0.11 | 0.25 |
| chr2 | 146838496 | 146839535 | Xrn2          | ENSMUSG00000027433 | 283   | 0.16 | 0.42 | 0.14 | 0.13 | 0.16 | 0.16 |
| chr2 | 147011469 | 147011768 | Nkx2-2        | ENSMUSG00000027434 | 379   | 0.12 | 0.09 | 0.1  | 0.18 | 0.05 | 0.08 |
| chr2 | 147874380 | 147874786 | Foxa2         | ENSMUSG00000037025 | -1878 | 0.09 | 0.09 | 0.07 | 0.18 | 0.12 | 0.14 |
| chr2 | 150514252 | 150514687 | Vsx1          | ENSMUSG00000033080 | 627   | 0.18 | 0.17 | 0.11 | 0.15 | 0.15 | 0.11 |
| chr2 | 150864741 | 150865238 | Nanp          | ENSMUSG00000053916 | 109   | 0.1  | 0.08 | 0.09 | 0.07 | 0.09 | 0.11 |
| chr2 | 151319868 | 151320535 | Nsfl1c        | ENSMUSG00000027455 | 283   | 1    | NA   | 0.24 | NA   | 1    | 0.22 |
| chr2 | 152052241 | 152053205 | Csnk2a1       | ENSMUSG00000074698 | 148   | 0.17 | 0.19 | 0.09 | 0.09 | 0.17 | 0.1  |
| chr2 | 152656593 | 152657555 | Bcl2l1        | ENSMUSG00000007659 | -226  | 0.08 | 0.24 | 0.08 | 0.12 | 0.09 | 0.18 |
| chr2 | 153269329 | 153270248 | 8430427H17Rik | ENSMUSG00000061411 | 427   | 0.11 | 0.1  | 0.09 | 0.1  | 0.1  | 0.14 |
| chr2 | 154233436 | 154234095 | Snta1         | ENSMUSG00000027488 | -49   | 0.14 | 0.32 | 0.11 | 0.18 | 0.14 | 0.22 |
| chr2 | 155418204 | 155418535 | Gss           | ENSMUSG00000027610 | -66   | 0.25 | 0.07 | 0.11 | 0.13 | 0.15 | 0.22 |
| chr2 | 155651826 | 155652567 | Eif6          | ENSMUSG00000027613 | -24   | 0.13 | 0.12 | 0.13 | 0.16 | 0.13 | 0.18 |
| chr2 | 155782200 | 155782706 | Cep250        | ENSMUSG00000038241 | 159   | 0.05 | 0.04 | 0.09 | 0.07 | 0.06 | 0.12 |
| chr2 | 156022274 | 156022960 | Phf20         | ENSMUSG00000038116 | 239   | 0.14 | 0.21 | 0.06 | 0.1  | 0.15 | 0.08 |
| chr2 | 156439614 | 156440104 | Dlgap4        | ENSMUSG00000061689 | 418   | 0.09 | 0.16 | 0.08 | 0.14 | 0.09 | 0.1  |
| chr2 | 156546364 | 156547205 | 4930405A21Rik | ENSMUSG00000086638 | -222  | 0.17 | 0.16 | 0.08 | 0.17 | 0.17 | 0.11 |
| chr2 | 163244675 | 163245758 | 3230401D17Rik | ENSMUSG00000035399 | -336  | 0.1  | 0.18 | 0.1  | 0.16 | 0.09 | 0.11 |
| chr2 | 163470437 | 163471009 | 0610039K10Rik | ENSMUSG00000058812 | 137   | 0.16 | 0.14 | 0.08 | 0.1  | 0.17 | 0.15 |
| chr2 | 164215291 | 164215623 | Slpi          | ENSMUSG00000017002 | -626  | 1    | NA   | 0.4  | NA   | 1    | 0.2  |
| chr2 | 164571229 | 164571585 | Wfdc3         | ENSMUSG00000076434 | 24    | 0.14 | 0.09 | 0.06 | 0.17 | 0.12 | 0.1  |
| chr2 | 165112901 | 165113382 | Slc35c2       | ENSMUSG00000017664 | 114   | 0.07 | 0.19 | 0.09 | 0.09 | 0.08 | 0.09 |
| chr2 | 166619160 | 166619719 | Trp53rk       | ENSMUSG00000042854 | 172   | 0.12 | 0.3  | 0.14 | 0.13 | 0.17 | 0.14 |
| chr2 | 169958956 | 169959228 | Zfp217        | ENSMUSG00000052056 | 353   | 0.5  | 0.33 | 0.23 | 0.29 | 0.46 | 0.28 |
| chr2 | 172805255 | 172805631 | Spo11         | ENSMUSG00000005883 | 100   | 0.86 | 0.92 | 0.84 | 0.76 | 0.86 | 0.92 |
| chr2 | 174111512 | 174111722 | Nespas        | ENSMUSG00000086537 | -681  | 0.44 | 0.77 | 0.55 | 0.58 | 0.44 | 0.62 |
| chr2 | 174586078 | 174586599 | Edn3          | ENSMUSG00000027524 | 218   | 0.14 | 0.15 | 0.12 | 0.27 | 0.14 | 0.15 |
| chr2 | 180332805 | 180333192 | Col9a3        | ENSMUSG00000027570 | 71    | 0.2  | 0.11 | 0.13 | 0.15 | 0.19 | 0.18 |
| chr2 | 180701673 | 180702437 | Arfgap1       | ENSMUSG00000027575 | 125   | 0.11 | 0.11 | 0.11 | 0.15 | 0.11 | 0.16 |
| chr2 | 181414848 | 181415403 | Tcea2         | ENSMUSG00000059540 | 110   | 0.06 | 0.15 | 0.1  | 0.14 | 0.1  | 0.1  |

|      |           |           |               |                    |       |      |      |      |      |      |      |
|------|-----------|-----------|---------------|--------------------|-------|------|------|------|------|------|------|
| chr2 | 118488984 | 118489204 | Pak6          | ENSMUSG00000074923 | 55    | NA   | 0.09 | 0.11 | 0.2  | 0.08 | 0.2  |
| chr2 | 3336219   | 3336537   | Meig1         | ENSMUSG00000026650 | -87   | 0.27 | 0.17 | 0.08 | 0.16 | NA   | 0.08 |
| chr2 | 4984804   | 4985244   | Optn          | ENSMUSG00000026672 | -40   | NA   | NA   | 0.2  | 0.13 | 0.67 | 0.19 |
| chr2 | 11700234  | 11700504  | Ankrd16       | ENSMUSG00000047909 | 169   | NA   | 0.28 | 0.08 | 0.19 | NA   | 0.16 |
| chr2 | 13192876  | 13193132  | Rsu1          | ENSMUSG00000026727 | -107  | NA   | NA   | 1    | 0.75 | 0.67 | NA   |
| chr2 | 18602563  | 18602844  | Bmi1          | ENSMUSG00000026739 | 82    | NA   | 0.13 | 0.11 | 0.32 | 0.5  | 0.2  |
| chr2 | 19353534  | 19354005  | Gm13344       | ENSMUSG00000087103 | -159  | 0.5  | NA   | 0.1  | 0.43 | NA   | 0.29 |
| chr2 | 19831222  | 19831956  | Etl4          | ENSMUSG00000036617 | 182   | 1    | 0.18 | 0.24 | 0.35 | NA   | 0.14 |
| chr2 | 21289352  | 21289672  | Gpr158        | ENSMUSG00000045967 | 318   | NA   | NA   | 1    | NA   | NA   | 0.25 |
| chr2 | 21290398  | 21290637  | Gm13327       | ENSMUSG00000085680 | 221   | NA   | NA   | 0.33 | NA   | NA   | NA   |
| chr2 | 22924551  | 22924761  | Acbd5         | ENSMUSG00000026781 | 68    | NA   | 0.33 | 0.16 | 0.28 | 0.27 | 0.19 |
| chr2 | 24329620  | 24329940  | Pax8          | ENSMUSG00000026976 | 837   | NA   | NA   | 0.25 | NA   | 0.33 | 0.43 |
| chr2 | 24790329  | 24790779  | Arrdc1        | ENSMUSG00000026972 | 20    | NA   | 0.22 | 0.12 | 0.18 | 0.23 | 0.15 |
| chr2 | 24817849  | 24818067  | Wdr85         | ENSMUSG00000026975 | 38    | NA   | NA   | 0.25 | NA   | NA   | NA   |
| chr2 | 25316173  | 25316697  | BC029214      | ENSMUSG00000047617 | -251  | NA   | NA   | 0.12 | NA   | NA   | 0.13 |
| chr2 | 25719251  | 25719938  | Kcnt1         | ENSMUSG00000058740 | 279   | NA   | NA   | 0.12 | 0.24 | 0.13 | 0.07 |
| chr2 | 25915699  | 25915956  | Gm13554       | ENSMUSG00000087515 | 1297  | 1    | NA   | 1    | 1    | NA   | 1    |
| chr2 | 26495540  | 26495878  | Snhg7         | ENSMUSG00000091299 | 41    | 1    | 0.2  | 0.11 | 0.38 | NA   | 0.2  |
| chr2 | 26758094  | 26758447  | Surf6         | ENSMUSG00000036160 | 40    | NA   | 0.12 | 0.13 | 0.16 | 0.1  | 0.14 |
| chr2 | 26819559  | 26819963  | Rexo4         | ENSMUSG00000052406 | 37    | NA   | 0.67 | 0.17 | 0.23 | 0.25 | 0.23 |
| chr2 | 28555064  | 28555299  | 1700026L06Rik | ENSMUSG00000026809 | -12   | NA   | 1    | 0.14 | 0.18 | 0.07 | 0.18 |
| chr2 | 29642944  | 29643190  | Coq4          | ENSMUSG00000026798 | 54    | 0.5  | NA   | 0.12 | 0.25 | NA   | 0.17 |
| chr2 | 29724632  | 29725071  | Cercam        | ENSMUSG00000039787 | 167   | NA   | 0.15 | 0.06 | 0.08 | 0.1  | 0.2  |
| chr2 | 29790805  | 29791207  | Gle1          | ENSMUSG00000019715 | 60    | NA   | 0.33 | 0.2  | 0.08 | 0.08 | 0.32 |
| chr2 | 29918396  | 29918675  | Set           | ENSMUSG00000054766 | 414   | NA   | NA   | 0.5  | NA   | NA   | NA   |
| chr2 | 30214628  | 30214988  | Sh3glb2       | ENSMUSG00000026860 | -57   | NA   | 0.12 | 0.09 | 0.2  | 0.06 | 0.11 |
| chr2 | 30662978  | 30663827  | Mettl11a      | ENSMUSG00000026857 | 56    | NA   | NA   | NA   | NA   | 0.38 | NA   |
| chr2 | 32216921  | 32217267  | Ciz1          | ENSMUSG00000039205 | -1436 | NA   | NA   | NA   | NA   | NA   | 1    |
| chr2 | 32430828  | 32431384  | 9430097D07Rik | ENSMUSG00000075405 | 98    | NA   | 1    | 1    | 0.55 | 0.93 | 0.8  |
| chr2 | 32449592  | 32449815  | St6galnac4    | ENSMUSG00000079442 | -93   | NA   | NA   | NA   | NA   | 1    | NA   |

|      |           |           |               |                    |       |      |      |      |      |      |      |
|------|-----------|-----------|---------------|--------------------|-------|------|------|------|------|------|------|
| chr2 | 35111851  | 35112285  | Gsn           | ENSMUSG00000026879 | 141   | 0.1  | 0.11 | 0.08 | 0.19 | NA   | 0.07 |
| chr2 | 35137841  | 35138151  | Gsn           | ENSMUSG00000026879 | 96    | 0.21 | 0.5  | 0.1  | 0.1  | NA   | 0.12 |
| chr2 | 35991805  | 35992213  | Mrrf          | ENSMUSG00000026887 | 100   | 1    | 0.49 | 0.07 | 0.17 | NA   | 0.21 |
| chr2 | 36058618  | 36058837  | Gm13429       | ENSMUSG00000085141 | 385   | NA   | NA   | 1    | NA   | NA   | NA   |
| chr2 | 37214564  | 37214875  | Pdcl          | ENSMUSG00000009030 | -10   | NA   | NA   | 0.33 | 0.67 | NA   | 0.33 |
| chr2 | 38367218  | 38367638  | Nek6          | ENSMUSG00000026749 | 94    | NA   | 0.13 | 0.07 | 0.2  | 0.15 | 0.13 |
| chr2 | 55289556  | 55289818  | Kcnj3         | ENSMUSG00000026824 | 120   | NA   | 0.5  | 0.17 | 0.13 | NA   | 0.13 |
| chr2 | 56968765  | 56969268  | Nr4a2         | ENSMUSG00000026826 | -1567 | NA   | 0.11 | 0.16 | 0.33 | 0.16 | 0.39 |
| chr2 | 60113439  | 60113654  | Gm13573       | ENSMUSG00000080198 | 85    | NA   | NA   | 1    | NA   | NA   | NA   |
| chr2 | 66472780  | 66473039  | Scn9a         | ENSMUSG00000075316 | 100   | 0.08 | 0.11 | 0.1  | 0.14 | NA   | 0.17 |
| chr2 | 71049838  | 71050361  | Dync1i2       | ENSMUSG00000027012 | 236   | NA   | NA   | 0.16 | 0.21 | 0.25 | 0.16 |
| chr2 | 71819348  | 71819564  | Rapgef4       | ENSMUSG00000049044 | 112   | NA   | NA   | 0.2  | NA   | 0.2  | 1    |
| chr2 | 72471910  | 72472149  | Ak3l2-ps      | ENSMUSG00000081957 | 36    | NA   | 1    | 0.9  | 1    | NA   | 1    |
| chr2 | 73109812  | 73110111  | Sp9           | ENSMUSG00000068859 | -21   | NA   | 0.47 | 0.14 | 0.17 | 0.19 | 0.19 |
| chr2 | 73729951  | 73731147  | Atf2          | ENSMUSG00000027104 | 38    | NA   | 1    | 0.09 | 0.16 | 1    | 0.09 |
| chr2 | 74497665  | 74497962  | Evx2          | ENSMUSG00000001815 | 105   | NA   | 0.5  | 0.2  | 0.16 | 0.53 | 0.2  |
| chr2 | 74517729  | 74518133  | Hoxd11        | ENSMUSG00000042499 | 482   | NA   | 1    | 0.62 | NA   | NA   | 0.67 |
| chr2 | 74565390  | 74565699  | Hoxd4         | ENSMUSG00000042464 | 413   | 0.11 | 0.06 | 0.09 | 0.12 | NA   | 0.12 |
| chr2 | 75819604  | 75819872  | Ttc30a1       | ENSMUSG00000075271 | 286   | NA   | NA   | 0.16 | 1    | NA   | NA   |
| chr2 | 78353011  | 78353539  | Gm14460       | ENSMUSG00000082701 | 218   | NA   | NA   | 0.97 | 0.95 | NA   | 0.97 |
| chr2 | 80286974  | 80287235  | Frzb          | ENSMUSG00000027004 | 678   | NA   | NA   | 0.75 | 0.75 | NA   | 0.46 |
| chr2 | 80287508  | 80287928  | Frzb          | ENSMUSG00000027004 | 64    | NA   | NA   | 0.08 | 0.75 | NA   | NA   |
| chr2 | 84567377  | 84567663  | Clp1          | ENSMUSG00000027079 | -121  | NA   | NA   | 0.16 | 1    | NA   | 0.3  |
| chr2 | 91076796  | 91077303  | Ddb2          | ENSMUSG00000002109 | -59   | 0.41 | 0.54 | 0.2  | 0.22 | NA   | 0.15 |
| chr2 | 91898623  | 91898891  | 2900072N19Rik | ENSMUSG00000087018 | 769   | NA   | 0.48 | 0.19 | 0.32 | 0.15 | 0.15 |
| chr2 | 103324919 | 103325266 | Cat           | ENSMUSG00000027187 | 190   | 0.33 | 0.43 | 0.18 | 0.17 | NA   | 0.27 |
| chr2 | 104430385 | 104431276 | Cstf3         | ENSMUSG00000027176 | 150   | NA   | 0.28 | 0.13 | 0.19 | 0.12 | 0.14 |
| chr2 | 105521534 | 105521746 | Pax6          | ENSMUSG00000027168 | -229  | NA   | 0.15 | 0.15 | 0.13 | NA   | 0.17 |
| chr2 | 105522332 | 105522544 | Pax6          | ENSMUSG00000027168 | -182  | 0.55 | NA   | 0.18 | 0.18 | NA   | 0.15 |
| chr2 | 106535253 | 106535515 | Mpped2        | ENSMUSG00000016386 | 7     | NA   | NA   | 1    | NA   | NA   | 0.4  |

|      |           |           |               |                     |      |      |      |      |      |      |      |
|------|-----------|-----------|---------------|---------------------|------|------|------|------|------|------|------|
| chr2 | 109514189 | 109514401 | Bdnf          | ENSMUSG00000048482  | -562 | NA   | 0.17 | 0.1  | 0.16 | 0.07 | 0.18 |
| chr2 | 109857897 | 109858195 | Ccdc34        | ENSMUSG00000027160  | 72   | NA   | NA   | 0.05 | 0.14 | 0.08 | 0.05 |
| chr2 | 113167533 | 113167971 | Fmn1          | ENSMUSG00000044042  | -141 | NA   | NA   | 1    | NA   | NA   | 1    |
| chr2 | 114480401 | 114480716 | Atpd4         | ENSMUSG00000057147  | 65   | NA   | 1    | 0.08 | 0.08 | 0.23 | 0.11 |
| chr2 | 115407088 | 115407477 | Gm13977       | ENSMUSG00000086735  | 9    | NA   | NA   | NA   | 1    | NA   | NA   |
| chr2 | 118082505 | 118082743 | Fsip1         | ENSMUSG00000027344  | 68   | NA   | NA   | NA   | NA   | NA   | 0.27 |
| chr2 | 119034318 | 119034772 | Zfyve19       | ENSMUSG00000068580  | 192  | NA   | NA   | 0.13 | 0.19 | 1    | 0.1  |
| chr2 | 119114258 | 119114491 | Vps18         | ENSMUSG00000034216  | -102 | NA   | 0.38 | 0.14 | 0.17 | 0.17 | 0.12 |
| chr2 | 119488357 | 119488615 | Ndufaf1       | ENSMUSG00000027305  | 48   | NA   | 0.33 | 0.16 | 0.27 | 1    | 0.29 |
| chr2 | 119613222 | 119613425 | Rpap1         | ENSMUSG00000034032  | -87  | NA   | 1    | NA   | NA   | NA   | NA   |
| chr2 | 119722791 | 119723434 | Mga           | ENSMUSG00000033943  | 148  | NA   | 0.57 | 0.13 | 0.4  | 0.73 | 0.21 |
| chr2 | 119853156 | 119853358 | Gm13999       | ENSMUSG00000087458  | -68  | NA   | NA   | 0.16 | 0.1  | 0.08 | NA   |
| chr2 | 120178458 | 120178915 | Vps39         | ENSMUSG00000027291  | 159  | NA   | 0.5  | 0.19 | 0.67 | 0.17 | 0.13 |
| chr2 | 120393298 | 120393780 | Snap23        | ENSMUSG00000027287  | 132  | NA   | 0.31 | 0.17 | 0.17 | 0.11 | 0.17 |
| chr2 | 120454800 | 120455006 | Stard9        | ENSMUSG00000033705  | 41   | NA   | 0.14 | 0.07 | 0.12 | 0.04 | 0.1  |
| chr2 | 121114849 | 121115130 | Mtap1a        | ENSMUSG00000027254  | -347 | NA   | NA   | 0.33 | 0.64 | NA   | 0.12 |
| chr2 | 121332176 | 121332528 | Mfap1a        | ENSMUSG00000068479  | 49   | 0.67 | NA   | 0.15 | NA   | NA   | 0.25 |
| chr2 | 122124398 | 122124845 | Duoxa2        | ENSMUSG00000027225  | -15  | NA   | 1    | 0.33 | NA   | NA   | 0.45 |
| chr2 | 122436768 | 122437178 | Gatm          | ENSMUSG00000027199  | 66   | NA   | 0.14 | 0.15 | 0.07 | 0.5  | 0.08 |
| chr2 | 122564064 | 122564576 | 4930580A09Rik | ENSMUSG00000085633  | -222 | NA   | 0.5  | 0.09 | 0.27 | 0.82 | 0.08 |
| chr2 | 122590824 | 122591258 | Sqrdl         | ENSMUSG00000005803  | 68   | NA   | 0.19 | 0.09 | 0.13 | 0.16 | 0.09 |
| chr2 | 126896324 | 126896619 | Blvra         | ENSMUSG00000001999  | 70   | NA   | 0.33 | 0.1  | 0.1  | 0.13 | 0.1  |
| chr2 | 126968970 | 126969242 | Itpril1       | ENSMUSG00000074825  | -64  | NA   | 0.17 | 0.08 | 0.12 | 0.06 | 0.17 |
| chr2 | 127270048 | 127270335 | Fahd2a        | ENSMUSG00000027371  | 25   | NA   | 0.63 | 0.13 | 0.11 | 0.12 | 0.31 |
| chr2 | 127410304 | 127410528 | Zfp661        | ENSMUSG00000034800  | -11  | NA   | NA   | 0.07 | 0.18 | NA   | 0.06 |
| chr2 | 127617935 | 127618296 | 1500011K16Rik | ENSMUSG000000051319 | 109  | NA   | 0.17 | 0.08 | 1    | 0.23 | 0.21 |
| chr2 | 128643922 | 128644270 | Tmem87b       | ENSMUSG00000014353  | -24  | NA   | 0.12 | 0.09 | 0.09 | 0.07 | 0.18 |
| chr2 | 128926776 | 128927018 | Polr1b        | ENSMUSG00000027395  | 134  | NA   | 0.79 | 0.31 | 0.28 | 0.24 | 0.16 |
| chr2 | 131035802 | 131036157 | 2310035K24Rik | ENSMUSG00000068264  | -127 | NA   | NA   | 0.33 | NA   | 0.7  | 0.11 |
| chr2 | 131735589 | 131735831 | Prnp          | ENSMUSG00000079037  | 46   | 0.8  | NA   | 0.1  | 0.5  | NA   | 0.32 |

|      |           |           |               |                    |       |      |      |      |      |      |      |
|------|-----------|-----------|---------------|--------------------|-------|------|------|------|------|------|------|
| chr2 | 131854810 | 131855064 | Rassf2        | ENSMUSG00000027339 | -35   | NA   | 0.25 | 0.14 | 0.19 | NA   | 0.2  |
| chr2 | 132078317 | 132079290 | Pcna          | ENSMUSG00000027342 | -471  | NA   | 0.5  | 0.17 | 0.14 | 0.33 | 0.11 |
| chr2 | 132512685 | 132512902 | 1110034G24Rik | ENSMUSG00000044991 | 126   | NA   | 0.13 | 0.13 | 0.25 | 0.12 | 0.15 |
| chr2 | 134469408 | 134469979 | Tmx4          | ENSMUSG00000034723 | 84    | NA   | 0.18 | 0.08 | 0.07 | 0.1  | 0.17 |
| chr2 | 136213305 | 136213516 | Pak7          | ENSMUSG00000039913 | 264   | 0.15 | 0.08 | 0.06 | 0.1  | NA   | 0.15 |
| chr2 | 144381494 | 144381755 | Sec23b        | ENSMUSG00000027429 | -341  | NA   | 0.17 | 1    | 0.6  | 0.58 | 0.52 |
| chr2 | 148233886 | 148234144 | Thbd          | ENSMUSG00000074743 | -91   | 0.36 | 0.33 | 0.11 | 0.5  | NA   | 0.4  |
| chr2 | 148557832 | 148558209 | Napb          | ENSMUSG00000027438 | 107   | 1    | NA   | 0.09 | 1    | NA   | 0.14 |
| chr2 | 148700812 | 148701312 | Cst3          | ENSMUSG00000027447 | 125   | NA   | NA   | 0.43 | NA   | NA   | NA   |
| chr2 | 150493721 | 150493971 | Acss1         | ENSMUSG00000027452 | 104   | NA   | 0.06 | 0.08 | 0.09 | 0.09 | 0.23 |
| chr2 | 151566563 | 151567130 | Psmf1         | ENSMUSG00000032869 | 183   | NA   | 1    | 0.13 | 0.5  | NA   | 0.27 |
| chr2 | 152495123 | 152495568 | H13           | ENSMUSG00000019188 | 148   | 1    | NA   | NA   | NA   | NA   | 0.2  |
| chr2 | 152560753 | 152561034 | Id1           | ENSMUSG00000042745 | -1094 | NA   | 0.14 | 0.1  | 0.18 | 0.11 | 0.08 |
| chr2 | 152562049 | 152562756 | Id1           | ENSMUSG00000042745 | 415   | NA   | 0.09 | 0.12 | 0.23 | 0.08 | 0.17 |
| chr2 | 154198096 | 154198574 | Cdk5rap1      | ENSMUSG00000027487 | 92    | NA   | NA   | 0.25 | 1    | 0.33 | 0.16 |
| chr2 | 154378232 | 154378533 | 1700007I08Rik | ENSMUSG00000078129 | 870   | NA   | NA   | NA   | NA   | NA   | 0.26 |
| chr2 | 155755680 | 155756001 | Uqcc          | ENSMUSG00000005882 | -86   | NA   | NA   | 0.15 | 0.17 | 0.12 | 0.13 |
| chr2 | 158054625 | 158055209 | D630003M21Rik | ENSMUSG00000037813 | 41    | NA   | NA   | 0.5  | 0.73 | 0.75 | 0.4  |
| chr2 | 158187069 | 158187345 | 9430008C03Rik | ENSMUSG00000085385 | 4     | NA   | 0.5  | 0.14 | 0.15 | 0.5  | 0.14 |
| chr2 | 158201278 | 158201501 | Snhg11        | ENSMUSG00000044349 | 15    | NA   | NA   | NA   | NA   | NA   | 0.43 |
| chr2 | 162734043 | 162734274 | Gm11452       | ENSMUSG00000082514 | 498   | NA   | 1    | 0.23 | 1    | NA   | 0.21 |
| chr2 | 162843086 | 162843478 | Ift52         | ENSMUSG00000017858 | 192   | NA   | 0.25 | 0.08 | 0.24 | 0.13 | 0.07 |
| chr2 | 163264224 | 163264537 | Gdap111       | ENSMUSG00000017943 | 111   | NA   | 0.5  | 0.18 | 0.62 | 0.4  | 0.26 |
| chr2 | 163297946 | 163298444 | 2310001K24Rik | ENSMUSG00000053353 | -132  | NA   | NA   | 0.12 | 0.4  | NA   | 0.24 |
| chr2 | 163996707 | 163996962 | Kcns1         | ENSMUSG00000040164 | 15    | NA   | NA   | 0.15 | 0.35 | 1    | 0.27 |
| chr2 | 164322839 | 164323249 | Pigt          | ENSMUSG00000017721 | 24    | 1    | 0.67 | 0.25 | 1    | NA   | 0.25 |
| chr2 | 164648482 | 164648692 | Zswim1        | ENSMUSG00000017764 | 74    | 0.4  | 0.29 | 0.2  | 0.07 | NA   | 0.09 |
| chr2 | 164658287 | 164658926 | Ctsa          | ENSMUSG00000017760 | 233   | NA   | 0.41 | 0.23 | 0.3  | 0.17 | 0.36 |
| chr2 | 164778848 | 164779065 | Mmp9          | ENSMUSG00000017737 | -930  | NA   | 1    | NA   | NA   | 0.36 | 0.17 |
| chr2 | 165194046 | 165194341 | Zfp663        | ENSMUSG00000056824 | 30    | 0.33 | NA   | 0.07 | 0.18 | NA   | 0.25 |

|      |           |           |               |                    |       |      |      |      |      |      |      |
|------|-----------|-----------|---------------|--------------------|-------|------|------|------|------|------|------|
| chr2 | 165298520 | 165298771 | Slc13a3       | ENSMUSG00000018459 | 54    | NA   | 0.07 | 0.12 | 0.07 | 0.07 | 0.09 |
| chr2 | 165687122 | 165687385 | Zmynd8        | ENSMUSG00000039671 | 252   | NA   | NA   | 1    | NA   | NA   | NA   |
| chr2 | 168106725 | 168107110 | Kcng1         | ENSMUSG00000074575 | -285  | NA   | NA   | NA   | NA   | NA   | 1    |
| chr2 | 169459088 | 169459407 | Tshz2         | ENSMUSG00000047907 | 71    | NA   | 1    | 0.17 | NA   | NA   | NA   |
| chr2 | 177877015 | 177877351 | Phactr3       | ENSMUSG00000027525 | 545   | NA   | 0.67 | 0.23 | 1    | 0.34 | 0.21 |
| chr2 | 179709993 | 179710273 | Taf4a         | ENSMUSG00000039117 | 131   | NA   | 0.08 | 0.06 | 0.07 | 0.05 | 0.08 |
| chr2 | 180008207 | 180008477 | Cables2       | ENSMUSG00000038990 | -141  | NA   | 0.56 | 0.17 | 0.5  | 0.75 | 0.29 |
| chr2 | 180626205 | 180626442 | Gm14342       | ENSMUSG00000086166 | -1958 | NA   | NA   | NA   | NA   | NA   | 0.5  |
| chr2 | 181099439 | 181100297 | Arfrp1        | ENSMUSG00000038671 | -352  | NA   | 0.22 | 0.09 | 0.15 | 0.09 | 0.14 |
| chr2 | 181100632 | 181100870 | Zgpat         | ENSMUSG00000027582 | 594   | 0.06 | 0.09 | 0.08 | 0.09 | NA   | 0.12 |
| chr2 | 181231822 | 181232239 | Tpd52l2       | ENSMUSG00000000827 | 183   | NA   | 0.75 | NA   | NA   | NA   | NA   |
| chr2 | 181431947 | 181432174 | 4930526D03Rik | ENSMUSG00000045794 | 61    | NA   | 1    | NA   | NA   | NA   | 1    |
| chr3 | 9608980   | 9609332   | Zfp704        | ENSMUSG00000040209 | 929   | 0.34 | 0.27 | 0.16 | 0.13 | 0.1  | 0.18 |
| chr3 | 38383299  | 38384271  | Ankrd50       | ENSMUSG00000044864 | -48   | 0.27 | 0.15 | 0.08 | 0.15 | 0.08 | 0.13 |
| chr3 | 94641252  | 94642240  | Pogz          | ENSMUSG00000038902 | 257   | 0.32 | 0.12 | 0.11 | 0.14 | 0.1  | 0.15 |
| chr3 | 54496408  | 54496981  | Fam48a        | ENSMUSG00000027751 | -333  | 0.74 | 0.17 | 0.11 | 0.27 | 0.18 | 0.2  |
| chr3 | 41368633  | 41370233  | Phf17         | ENSMUSG00000025764 | 631   | 0.3  | 0.2  | 0.11 | 0.16 | 0.13 | 0.18 |
| chr3 | 153568583 | 153569035 | Msh4          | ENSMUSG00000005493 | 293   | 0.42 | 0.65 | 0.75 | 0.86 | 0.79 | 0.86 |
| chr3 | 88004433  | 88005209  | AW047730      | ENSMUSG00000091886 | 276   | 0.08 | 0.23 | 0.12 | 0.2  | 0.22 | 0.12 |
| chr3 | 36470313  | 36471238  | Ccna2         | ENSMUSG00000027715 | 74    | 0.07 | 0.18 | 0.12 | 0.13 | 0.17 | 0.18 |
| chr3 | 37318073  | 37319867  | Nudt6         | ENSMUSG00000050174 | -482  | 0.27 | 0.21 | 0.13 | 0.18 | 0.09 | 0.14 |
| chr3 | 88991084  | 88991401  | Fam189b       | ENSMUSG00000032657 | -56   | 0.69 | 0.56 | 0.35 | 0.35 | 0.46 | 0.56 |
| chr3 | 103379101 | 103380528 | Syt6          | ENSMUSG00000027849 | 660   | 0.25 | 0.14 | 0.12 | 0.16 | 0.1  | 0.15 |
| chr3 | 95462409  | 95463400  | Mcl1          | ENSMUSG00000038612 | 261   | 0.25 | 0.13 | 0.1  | 0.15 | 0.09 | 0.14 |
| chr3 | 103771939 | 103772771 | Phf1          | ENSMUSG00000058388 | 322   | 0.32 | 0.22 | 0.2  | 0.16 | 0.15 | 0.19 |
| chr3 | 96708696  | 96709300  | Gpr89         | ENSMUSG00000028096 | 237   | 0.21 | 0.11 | 0.11 | 0.16 | 0.06 | 0.14 |
| chr3 | 51219713  | 51220807  | Naa15         | ENSMUSG00000063273 | 322   | 0.1  | 0.15 | 0.12 | 0.16 | 0.29 | 0.14 |
| chr3 | 122686809 | 122687936 | Usp53         | ENSMUSG00000039701 | -7    | 0.08 | 0.17 | 0.1  | 0.16 | 0.18 | 0.12 |
| chr3 | 63767901  | 63768786  | Slc33a1       | ENSMUSG00000027822 | -49   | 0.28 | 0.23 | 0.1  | 0.15 | 0.07 | 0.2  |
| chr3 | 26230281  | 26230848  | A830092H15Rik | ENSMUSG00000074664 | 492   | 0.5  | 0.12 | 0.1  | 0.27 | 0.04 | 0.13 |



|      |           |           |               |                    |      |      |      |      |      |      |      |
|------|-----------|-----------|---------------|--------------------|------|------|------|------|------|------|------|
| chr3 | 65331636  | 65333389  | 4931440P22Rik | ENSMUSG00000074580 | -406 | 0.11 | 0.09 | 0.1  | 0.16 | 0.05 | 0.11 |
| chr3 | 145421648 | 145422243 | Ddah1         | ENSMUSG00000028194 | 306  | 0.39 | 0.35 | 0.14 | 0.12 | 0.16 | 0.15 |
| chr3 | 32295794  | 32296862  | Pik3ca        | ENSMUSG00000027665 | -265 | 0.38 | 0.25 | 0.18 | 0.19 | 0.19 | 0.2  |
| chr3 | 113332564 | 113333192 | Rnpc3         | ENSMUSG00000027981 | -60  | 0.83 | 0.5  | 0.19 | 0.26 | 0.14 | 0.13 |
| chr3 | 19794634  | 19795495  | 4632415L05Rik | ENSMUSG00000048106 | 178  | 0.78 | 0.33 | 0.1  | 0.13 | 0.24 | 0.21 |
| chr3 | 129236570 | 129237198 | Elov6         | ENSMUSG00000041220 | 1580 | 0.3  | 0.24 | 0.1  | 0.22 | 0.13 | 0.16 |
| chr3 | 88489362  | 88490519  | 2810403A07Rik | ENSMUSG00000028060 | 224  | 0.33 | 0.37 | 0.15 | 0.35 | 0.09 | 0.21 |
| chr3 | 7503335   | 7503745   | Fam164a       | ENSMUSG00000043542 | 114  | 0.31 | 0.17 | 0.1  | 0.16 | 0.13 | 0.18 |
| chr3 | 55986724  | 55988043  | Nbea          | ENSMUSG00000027799 | 240  | 0.1  | 0.29 | 0.08 | 0.12 | 0.18 | 0.13 |
| chr3 | 40603789  | 40604660  | Plk4          | ENSMUSG00000025758 | 283  | 0.06 | 0.18 | 0.07 | 0.13 | 0.14 | 0.15 |
| chr3 | 153636293 | 153636705 | Slc44a5       | ENSMUSG00000028360 | 99   | 0.18 | 0.41 | 0.16 | 0.14 | 0.42 | 0.08 |
| chr3 | 138404972 | 138406152 | Tspan5        | ENSMUSG00000028152 | 403  | 0.29 | 0.17 | 0.14 | 0.18 | 0.14 | 0.15 |
| chr3 | 67386527  | 67387003  | Mfsd1         | ENSMUSG00000027775 | 75   | 0.42 | 0.33 | 0.37 | 0.27 | 0.1  | 0.18 |
| chr3 | 100292285 | 100293647 | Fam46c        | ENSMUSG00000044468 | 151  | 0.24 | 0.18 | 0.15 | 0.17 | 0.13 | 0.13 |
| chr3 | 96531380  | 96532064  | Polr3c        | ENSMUSG00000028099 | -324 | 0.1  | 0.18 | 0.09 | 0.21 | 0.23 | 0.1  |
| chr3 | 95799374  | 95800176  | Plekho1       | ENSMUSG00000015745 | -184 | 0.13 | 0.08 | 0.1  | 0.13 | 0.05 | 0.15 |
| chr3 | 157609905 | 157611054 | Ankrd13c      | ENSMUSG00000039988 | 101  | 0.07 | 0.21 | 0.12 | 0.15 | 0.12 | 0.13 |
| chr3 | 17954413  | 17955885  | Bhlhe22       | ENSMUSG00000025128 | 824  | 0.16 | 0.15 | 0.11 | 0.13 | 0.08 | 0.14 |
| chr3 | 16082947  | 16083830  | Ythdf3        | ENSMUSG00000047213 | 205  | 0.29 | 0.18 | 0.13 | 0.16 | 0.13 | 0.17 |
| chr3 | 89568320  | 89568574  | Chrn2         | ENSMUSG00000027950 | 107  | 0.44 | 0.08 | 0.1  | 0.17 | 0.08 | 0.19 |
| chr3 | 130813174 | 130815461 | Lef1          | ENSMUSG00000027985 | 928  | 0.27 | 0.19 | 0.16 | 0.2  | 0.18 | 0.17 |
| chr3 | 28162283  | 28162613  | Tnik          | ENSMUSG00000027692 | -37  | 0.16 | 0.11 | 0.15 | 0.12 | 0.08 | 0.13 |
| chr3 | 127255890 | 127256603 | Larp7         | ENSMUSG00000027968 | 20   | 0.37 | 0.13 | 0.08 | 0.2  | 0.11 | 0.15 |
| chr3 | 62310537  | 62311096  | Dhx36         | ENSMUSG00000027770 | 110  | 0.47 | 0.16 | 0.08 | 0.11 | 0.19 | 0.14 |
| chr3 | 107081843 | 107082350 | Hbxip         | ENSMUSG00000087260 | 320  | 0.24 | 0.13 | 0.16 | 0.26 | 0.08 | 0.12 |
| chr3 | 142058033 | 142058738 | Pdlim5        | ENSMUSG00000028273 | 186  | 0.23 | 0.12 | 0.09 | 0.16 | 0.14 | 0.11 |
| chr3 | 122627036 | 122627438 | 1810037I17Rik | ENSMUSG00000054091 | -43  | 0.3  | 0.35 | 0.16 | 0.15 | 0.1  | 0.19 |
| chr3 | 66784766  | 66785535  | Shox2         | ENSMUSG00000093425 | -87  | 0.22 | 0.29 | 0.09 | 0.13 | 0.09 | 0.16 |
| chr3 | 27608895  | 27610083  | Fndc3b        | ENSMUSG00000039286 | -128 | 0.22 | 0.21 | 0.1  | 0.17 | 0.12 | 0.13 |
| chr3 | 96473985  | 96474341  | Ankrd35       | ENSMUSG00000038354 | 109  | 0.33 | 0.34 | 0.13 | 0.15 | 0.17 | 0.14 |

|      |           |           |               |                    |      |      |      |      |      |      |      |
|------|-----------|-----------|---------------|--------------------|------|------|------|------|------|------|------|
| chr3 | 30498642  | 30498909  | Arpm1         | ENSMUSG00000037737 | 86   | 0.06 | 0.06 | 0.11 | 0.22 | 0.21 | 0.13 |
| chr3 | 125640743 | 125642027 | Ugt8a         | ENSMUSG00000032854 | 83   | 0.1  | 0.13 | 0.1  | 0.13 | 0.16 | 0.15 |
| chr3 | 9004109   | 9004643   | Tpd52         | ENSMUSG00000027506 | 61   | 0.15 | 0.15 | 0.14 | 0.22 | 0.3  | 0.27 |
| chr3 | 137806201 | 137807099 | Mtp           | ENSMUSG00000028158 | -298 | 0.28 | 0.25 | 0.13 | 0.23 | 0.16 | 0.17 |
| chr3 | 38783972  | 38787249  | Fat4          | ENSMUSG00000046743 | -252 | 0.21 | 0.19 | 0.1  | 0.17 | 0.12 | 0.15 |
| chr3 | 127493563 | 127493781 | Tifa          | ENSMUSG00000046688 | 97   | 0.46 | 0.11 | 0.14 | 0.11 | 0.13 | 0.17 |
| chr3 | 88968559  | 88969174  | Clk2          | ENSMUSG00000068917 | 149  | 0.42 | 0.29 | 0.11 | 0.22 | 0.2  | 0.16 |
| chr3 | 108357076 | 108357429 | Scarna2       | ENSMUSG00000088185 | 417  | 0.1  | 0.24 | 0.12 | 0.15 | 0.28 | 0.08 |
| chr3 | 54611096  | 54611825  | Rfxap         | ENSMUSG00000036615 | 253  | 0.13 | 0.1  | 0.07 | 0.14 | 0.06 | 0.12 |
| chr3 | 121128902 | 121130424 | Cnn3          | ENSMUSG00000053931 | 204  | 0.16 | 0.18 | 0.09 | 0.15 | 0.24 | 0.13 |
| chr3 | 144232502 | 144233943 | Hs2st1        | ENSMUSG00000040151 | -377 | 0.22 | 0.26 | 0.12 | 0.18 | 0.12 | 0.13 |
| chr3 | 145650609 | 145651858 | Syde2         | ENSMUSG00000036863 | 399  | 0.12 | 0.13 | 0.08 | 0.09 | 0.07 | 0.12 |
| chr3 | 97413823  | 97414229  | Chd1l         | ENSMUSG00000028089 | 100  | 0.49 | 0.3  | 0.11 | 0.18 | 0.23 | 0.1  |
| chr3 | 51287701  | 51288611  | Rab33b        | ENSMUSG00000027739 | 268  | 0.06 | 0.08 | 0.1  | 0.16 | 0.15 | 0.1  |
| chr3 | 51028376  | 51029433  | Ccrn4l        | ENSMUSG00000023087 | 512  | 0.27 | 0.15 | 0.09 | 0.15 | 0.17 | 0.11 |
| chr3 | 69120197  | 69121968  | Ppm1l         | ENSMUSG00000027784 | 299  | 0.15 | 0.11 | 0.11 | 0.15 | 0.1  | 0.16 |
| chr3 | 151872649 | 151874133 | Dnajb4        | ENSMUSG00000028035 | -408 | 0.21 | 0.25 | 0.11 | 0.14 | 0.13 | 0.14 |
| chr3 | 80840594  | 80841617  | Pdgfc         | ENSMUSG00000028019 | 11   | 0.11 | 0.08 | 0.1  | 0.11 | 0.05 | 0.14 |
| chr3 | 126066698 | 126066968 | Arsj          | ENSMUSG00000046561 | 88   | 0.36 | 0.62 | 0.23 | 0.16 | 0.79 | 0.45 |
| chr3 | 90268668  | 90270099  | Npr1          | ENSMUSG00000027931 | 405  | 0.24 | 0.21 | 0.14 | 0.2  | 0.16 | 0.22 |
| chr3 | 68673079  | 68674458  | 1110032F04Rik | ENSMUSG00000046999 | 260  | 0.15 | 0.13 | 0.09 | 0.13 | 0.09 | 0.13 |
| chr3 | 88894373  | 88895514  | Rusc1         | ENSMUSG00000041263 | -990 | 0.23 | 0.19 | 0.1  | 0.16 | 0.11 | 0.15 |
| chr3 | 94818728  | 94820168  | Zfp687        | ENSMUSG00000019338 | -308 | 0.23 | 0.22 | 0.12 | 0.19 | 0.12 | 0.15 |
| chr3 | 10366841  | 10367127  | Chmp4c        | ENSMUSG00000027536 | 77   | 0.44 | 0.56 | 0.22 | NA   | 0.08 | 0.19 |
| chr3 | 84283234  | 84284813  | Fhdc1         | ENSMUSG00000041842 | -610 | 0.06 | 0.22 | 0.09 | 0.13 | 0.12 | 0.11 |
| chr3 | 88357968  | 88358221  | Ubqln4        | ENSMUSG00000008604 | 456  | 0.32 | 0.28 | 0.15 | 0.25 | 0.69 | 0.25 |
| chr3 | 138189954 | 138191100 | Mir1956       | ENSMUSG00000088373 | 1142 | 0.14 | 0.13 | 0.1  | 0.12 | 0.09 | 0.11 |
| chr3 | 84617932  | 84619704  | Fbxw7         | ENSMUSG00000028086 | -372 | 0.14 | 0.15 | 0.1  | 0.13 | 0.2  | 0.11 |
| chr3 | 9609693   | 9610197   | Zfp704        | ENSMUSG00000040209 | 140  | 0.11 | 0.26 | 0.08 | 0.17 | 0.21 | 0.12 |
| chr3 | 13472896  | 13473372  | Gm2464        | ENSMUSG00000078587 | 1462 | 0.13 | 0.15 | 0.1  | 0.13 | 0.07 | 0.1  |

|      |           |           |          |                    |       |      |      |      |      |      |      |
|------|-----------|-----------|----------|--------------------|-------|------|------|------|------|------|------|
| chr3 | 137527001 | 137528745 | H2afz    | ENSMUSG00000037894 | 422   | 0.13 | 0.17 | 0.1  | 0.15 | 0.07 | 0.14 |
| chr3 | 30992635  | 30992854  | Skil     | ENSMUSG00000027660 | -1236 | 1    | 0.17 | 0.16 | 0.23 | 0.19 | 0.16 |
| chr3 | 27837395  | 27838037  | Pld1     | ENSMUSG00000027695 | 114   | 0.33 | 0.17 | 0.15 | 0.19 | 0.14 | 0.2  |
| chr3 | 34562300  | 34563395  | Sox2ot   | ENSMUSG00000090828 | -1318 | 0.1  | 0.53 | 0.15 | 0.18 | 0.31 | 0.14 |
| chr3 | 95160738  | 95161241  | Setdb1   | ENSMUSG00000015697 | 22    | 0.86 | 1    | 0.4  | 0.67 | 0.38 | 0.5  |
| chr3 | 105254930 | 105255988 | Kcnd3    | ENSMUSG00000040896 | 211   | 0.16 | 0.14 | 0.1  | 0.18 | 0.09 | 0.14 |
| chr3 | 152330577 | 152331155 | Ak5      | ENSMUSG00000039058 | 238   | 0.1  | 0.1  | 0.14 | 0.1  | 0.05 | 0.15 |
| chr3 | 89234081  | 89234575  | Pygo2    | ENSMUSG00000047824 | 192   | 0.37 | 0.28 | 0.13 | 0.17 | 0.2  | 0.18 |
| chr3 | 96000865  | 96001598  | Bola1    | ENSMUSG00000015943 | 278   | 0.22 | 0.2  | 0.09 | 0.19 | 0.11 | 0.09 |
| chr3 | 103718080 | 103719043 | Rsb1     | ENSMUSG00000044098 | 71    | 0.05 | 0.09 | 0.07 | 0.13 | 0.13 | 0.13 |
| chr3 | 122321372 | 122323162 | Fnbp1l   | ENSMUSG00000039735 | 204   | 0.29 | 0.26 | 0.1  | 0.18 | 0.18 | 0.18 |
| chr3 | 105489935 | 105490922 | Ddx20    | ENSMUSG00000027905 | -66   | 0.07 | 0.13 | 0.1  | 0.11 | 0.11 | 0.11 |
| chr3 | 27052335  | 27052990  | Ect2     | ENSMUSG00000027699 | 42    | 0.08 | 0.27 | 0.11 | 0.26 | 0.17 | 0.14 |
| chr3 | 88963657  | 88964151  | Hcn3     | ENSMUSG00000028051 | -2    | 0.06 | 0.09 | 0.11 | 0.19 | 0.11 | 0.11 |
| chr3 | 104315338 | 104316081 | Lrig2    | ENSMUSG00000032913 | 70    | 1    | 0.16 | 0.2  | 0.22 | 0.11 | 0.18 |
| chr3 | 138737435 | 138738932 | Rap1gds1 | ENSMUSG00000028149 | -20   | 0.28 | 0.19 | 0.15 | 0.22 | 0.17 | 0.17 |
| chr3 | 116414650 | 116415340 | Slc35a3  | ENSMUSG00000027957 | -235  | 0.15 | 0.19 | 0.11 | 0.16 | 0.08 | 0.15 |
| chr3 | 21974658  | 21976150  | Tbl1xr1  | ENSMUSG00000027630 | -170  | 0.19 | 0.24 | 0.08 | 0.12 | 0.12 | 0.13 |
| chr3 | 75760098  | 75761056  | Golim4   | ENSMUSG00000034109 | -5    | 0.2  | 0.17 | 0.1  | 0.19 | 0.07 | 0.12 |
| chr3 | 152009324 | 152009955 | Usp33    | ENSMUSG00000025437 | 197   | 0.38 | 0.34 | 0.14 | 0.2  | 0.19 | 0.19 |
| chr3 | 95675283  | 95675622  | Mrps21   | ENSMUSG00000054312 | -162  | 0.4  | 0.29 | 0.19 | 0.14 | 0.1  | 0.2  |
| chr3 | 143864914 | 143865407 | Lmo4     | ENSMUSG00000028266 | 104   | 0.11 | 0.27 | 0.19 | 0.42 | 0.65 | 0.25 |
| chr3 | 83994405  | 83995030  | Trim2    | ENSMUSG00000027993 | -272  | 0.49 | 0.48 | 0.5  | 0.55 | 0.32 | 0.57 |
| chr3 | 86350709  | 86351716  | Lrba     | ENSMUSG00000028080 | -926  | 0.14 | 0.15 | 0.17 | 0.34 | 0.07 | 0.22 |
| chr3 | 107889158 | 107889681 | Ampd2    | ENSMUSG00000027889 | 126   | 0.16 | 0.09 | 0.12 | 0.13 | 0.09 | 0.12 |
| chr3 | 157229725 | 157230803 | Ptger3   | ENSMUSG00000040016 | 408   | 0.16 | 0.13 | 0.14 | 0.17 | 0.08 | 0.18 |
| chr3 | 20054546  | 20055126  | Gyg      | ENSMUSG00000019528 | 132   | 0.17 | 0.17 | 0.07 | 0.17 | 0.1  | 0.12 |
| chr3 | 122431833 | 122433685 | Pde5a    | ENSMUSG00000053965 | 683   | 0.2  | 0.24 | 0.13 | 0.15 | 0.14 | 0.18 |
| chr3 | 87572805  | 87573110  | Pear1    | ENSMUSG00000028073 | -100  | 0.75 | 0.57 | 0.18 | 0.2  | 0.11 | 0.12 |
| chr3 | 97461970  | 97462718  | Prkab2   | ENSMUSG00000038205 | 228   | 0.27 | 0.23 | 0.17 | 0.15 | 0.19 | 0.13 |

|      |           |           |               |                    |      |      |      |      |      |      |      |
|------|-----------|-----------|---------------|--------------------|------|------|------|------|------|------|------|
| chr3 | 107320033 | 107321025 | Slc6a17       | ENSMUSG00000027894 | -284 | 0.14 | 0.2  | 0.12 | 0.21 | 0.23 | 0.14 |
| chr3 | 97817231  | 97817943  | Notch2        | ENSMUSG00000027878 | 126  | 0.36 | 0.18 | 0.12 | 0.14 | 0.22 | 0.17 |
| chr3 | 68848291  | 68849198  | Trim59        | ENSMUSG00000034317 | -107 | 0.14 | 0.2  | 0.09 | 0.13 | 0.07 | 0.1  |
| chr3 | 30867604  | 30868428  | Phc3          | ENSMUSG00000037652 | 305  | 0.19 | 0.11 | 0.16 | 0.14 | 0.12 | 0.15 |
| chr3 | 62142640  | 62143896  | Arhgef26      | ENSMUSG00000036885 | 347  | 0.15 | 0.21 | 0.11 | 0.23 | 0.23 | 0.12 |
| chr3 | 88717384  | 88718010  | Msto1         | ENSMUSG00000068922 | 107  | 0.15 | 0.5  | 0.18 | 0.26 | 0.27 | 0.17 |
| chr3 | 94386031  | 94386656  | Snx27         | ENSMUSG00000028136 | 128  | 0.13 | 0.15 | 0.1  | 0.11 | 0.21 | 0.12 |
| chr3 | 89716717  | 89717301  | Il6ra         | ENSMUSG00000027947 | 75   | 0.06 | 0.09 | 0.08 | 0.12 | 0.12 | 0.12 |
| chr3 | 107134880 | 107137035 | Rbm15         | ENSMUSG00000048109 | 634  | 0.14 | 0.22 | 0.1  | 0.2  | 0.22 | 0.16 |
| chr3 | 91828440  | 91828925  | Gm6097        | ENSMUSG00000082826 | 193  | 0.87 | 0.88 | 0.54 | 0.69 | 0.65 | 0.77 |
| chr3 | 120965425 | 120966157 | Tmem56        | ENSMUSG00000028132 | 286  | 0.14 | 0.1  | 0.11 | 0.19 | 0.09 | 0.13 |
| chr3 | 109143413 | 109144071 | Vav3          | ENSMUSG00000033721 | 171  | 0.09 | 0.08 | 0.09 | 0.14 | 0.17 | 0.16 |
| chr3 | 143867560 | 143868825 | Lmo4          | ENSMUSG00000028266 | -48  | 0.17 | 0.19 | 0.11 | 0.16 | 0.12 | 0.16 |
| chr3 | 99044811  | 99045504  | Tbx15         | ENSMUSG00000027868 | 853  | 0.19 | 0.67 | 0.2  | 0.29 | 0.4  | 0.22 |
| chr3 | 87733754  | 87734508  | Rrnad1        | ENSMUSG00000004896 | -82  | 0.09 | 0.12 | 0.13 | 0.25 | 0.14 | 0.11 |
| chr3 | 127201341 | 127202192 | Gm4392        | ENSMUSG00000078164 | 153  | 0.15 | 0.17 | 0.16 | 0.18 | 0.09 | 0.2  |
| chr3 | 82859173  | 82859565  | Plrg1         | ENSMUSG00000027998 | -75  | 0.09 | 0.12 | 0.1  | 0.13 | 0.04 | 0.08 |
| chr3 | 87946076  | 87946880  | Mef2d         | ENSMUSG00000001419 | 184  | 0.07 | 0.11 | 0.11 | 0.1  | 0.14 | 0.13 |
| chr3 | 146113350 | 146113616 | Ctbs          | ENSMUSG00000028189 | 49   | 0.05 | 0.06 | 0.1  | 0.13 | 0.11 | 0.16 |
| chr3 | 85946192  | 85946691  | Rps3a         | ENSMUSG00000028081 | 183  | 0.19 | 0.1  | 0.12 | 0.17 | 0.1  | 0.15 |
| chr3 | 107434153 | 107434722 | Gm10961       | ENSMUSG00000078604 | 197  | 0.24 | 0.23 | 0.13 | 0.17 | 0.14 | 0.17 |
| chr3 | 132973002 | 132973600 | Ppa2          | ENSMUSG00000028013 | 227  | 0.15 | 0.27 | 0.15 | 0.09 | 0.06 | 0.18 |
| chr3 | 108013063 | 108013826 | Atxn7l2       | ENSMUSG00000048997 | -64  | 0.18 | 0.09 | 0.13 | 0.25 | 0.09 | 0.14 |
| chr3 | 133898958 | 133899261 | Cxxc4         | ENSMUSG00000044365 | -675 | 0.87 | 0.68 | 0.31 | 0.92 | 0.56 | 0.33 |
| chr3 | 88753817  | 88754922  | Dap3          | ENSMUSG00000068921 | -541 | 0.07 | 0.12 | 0.08 | 0.11 | 0.11 | 0.13 |
| chr3 | 108524656 | 108525330 | Gpsm2         | ENSMUSG00000027883 | 41   | 0.21 | 0.15 | 0.1  | 0.21 | 0.11 | 0.18 |
| chr3 | 14611032  | 14611738  | 1810022K09Rik | ENSMUSG00000078784 | -164 | 0.15 | 0.13 | 0.12 | 0.15 | 0.09 | 0.12 |
| chr3 | 27081799  | 27082208  | Nceh1         | ENSMUSG00000027698 | 116  | 1    | 1    | 0.3  | 0.9  | 0.19 | 0.13 |
| chr3 | 105603679 | 105604348 | Rap1a         | ENSMUSG00000068798 | 235  | 0.09 | 0.17 | 0.2  | 0.32 | 0.15 | 0.2  |
| chr3 | 69525793  | 69526657  | Nmd3          | ENSMUSG00000027787 | 318  | 0.17 | 0.23 | 0.13 | 0.13 | 0.12 | 0.17 |

|      |           |           |               |                    |      |      |      |      |      |      |      |
|------|-----------|-----------|---------------|--------------------|------|------|------|------|------|------|------|
| chr3 | 88357306  | 88357598  | Ubqln4        | ENSMUSG00000008604 | -186 | 0.13 | 0.11 | 0.12 | 0.15 | 0.29 | 0.24 |
| chr3 | 54915942  | 54916284  | Spg20         | ENSMUSG00000036580 | 83   | 0.12 | 0.18 | 0.1  | 0.16 | 0.06 | 0.16 |
| chr3 | 99966082  | 99966809  | Wdr3          | ENSMUSG00000033285 | -190 | 0.17 | 0.21 | 0.11 | 0.15 | 0.1  | 0.13 |
| chr3 | 108028756 | 108029686 | Sypl2         | ENSMUSG00000027887 | 340  | 0.12 | 0.17 | 0.17 | 0.18 | 0.17 | 0.2  |
| chr3 | 138105622 | 138106411 | Adh5          | ENSMUSG00000028138 | -41  | 0.1  | 0.1  | 0.12 | 0.15 | 0.06 | 0.13 |
| chr3 | 67318972  | 67319549  | Rarres1       | ENSMUSG00000049404 | 185  | 0.14 | 0.06 | 0.17 | 0.09 | 0.06 | 0.09 |
| chr3 | 40886342  | 40887591  | Pgrmc2        | ENSMUSG00000049940 | 2    | 0.05 | 0.07 | 0.11 | 0.2  | 0.1  | 0.15 |
| chr3 | 102007683 | 102008688 | Vangl1        | ENSMUSG00000027860 | -381 | 0.14 | 0.21 | 0.07 | 0.16 | 0.1  | 0.14 |
| chr3 | 128907259 | 128907591 | Pitx2         | ENSMUSG00000028023 | 560  | 0.08 | 0.08 | 0.1  | 0.13 | 0.13 | 0.21 |
| chr3 | 132754319 | 132755200 | Gstcd         | ENSMUSG00000028018 | -48  | 0.09 | 0.23 | 0.17 | 0.14 | 0.24 | 0.14 |
| chr3 | 36588409  | 36589082  | Trpc3         | ENSMUSG00000027716 | 344  | 0.06 | 0.07 | 0.09 | 0.11 | 0.09 | 0.12 |
| chr3 | 5575795   | 5576577   | Pxmp3         | ENSMUSG00000040374 | -36  | 0.24 | 0.14 | 0.15 | 0.16 | 0.15 | 0.17 |
| chr3 | 157197004 | 157197788 | Zranb2        | ENSMUSG00000028180 | 272  | 0.15 | 0.12 | 0.07 | 0.13 | 0.1  | 0.13 |
| chr3 | 90237277  | 90237722  | Ints3         | ENSMUSG00000027933 | 59   | 0.15 | 0.26 | 0.12 | 0.21 | 0.33 | 0.17 |
| chr3 | 51906253  | 51909054  | Maml3         | ENSMUSG00000061143 | 1160 | 0.1  | 0.15 | 0.12 | 0.18 | 0.14 | 0.16 |
| chr3 | 106904397 | 106905474 | Kcna2         | ENSMUSG00000040724 | 450  | 0.1  | 0.08 | 0.08 | 0.08 | 0.07 | 0.11 |
| chr3 | 144382611 | 144383416 | Sh3glb1       | ENSMUSG00000037062 | 274  | 0.22 | 0.21 | 0.08 | 0.12 | 0.13 | 0.15 |
| chr3 | 103612937 | 103613513 | Dclre1b       | ENSMUSG00000027845 | -110 | 0.27 | 0.56 | 0.12 | 0.17 | 0.12 | 0.13 |
| chr3 | 94113902  | 94114264  | Them4         | ENSMUSG00000028145 | 72   | 0.29 | 1    | 0.07 | 0.18 | 0.8  | 0.13 |
| chr3 | 121977037 | 121977732 | Dnrtip2       | ENSMUSG00000039756 | 52   | 0.17 | 0.17 | 0.1  | 0.17 | 0.1  | 0.15 |
| chr3 | 61168395  | 61169587  | Rap2b         | ENSMUSG00000036894 | 562  | 0.07 | 0.1  | 0.14 | 0.16 | 0.11 | 0.13 |
| chr3 | 95861784  | 95862055  | Vps45         | ENSMUSG00000015747 | -166 | 1    | 1    | 0.18 | 0.19 | 0.05 | 0.35 |
| chr3 | 5219318   | 5219878   | Zfx4          | ENSMUSG00000025255 | 1009 | 0.15 | 0.11 | 0.12 | 0.16 | 0.09 | 0.14 |
| chr3 | 89577023  | 89577983  | 4632404H12Rik | ENSMUSG00000042579 | -341 | 0.09 | 0.14 | 0.09 | 0.14 | 0.11 | 0.12 |
| chr3 | 110052807 | 110053992 | Prmt6         | ENSMUSG00000049300 | 512  | 0.17 | 0.13 | 0.13 | 0.12 | 0.11 | 0.19 |
| chr3 | 124023844 | 124024309 | Tram111       | ENSMUSG00000044528 | 121  | 0.07 | 0.17 | 0.09 | 0.16 | 0.15 | 0.11 |
| chr3 | 133207142 | 133208081 | Tet2          | ENSMUSG00000040943 | -257 | 0.16 | 0.1  | 0.09 | 0.13 | 0.11 | 0.16 |
| chr3 | 135489293 | 135489596 | Slc39a8       | ENSMUSG00000053897 | 390  | 0.2  | 0.15 | 0.15 | 0.19 | 0.14 | 0.19 |
| chr3 | 145312278 | 145313023 | Cyr61         | ENSMUSG00000028195 | 299  | 0.08 | 0.21 | 0.15 | 0.12 | 0.12 | 0.12 |
| chr3 | 145812757 | 145813272 | Mcoln2        | ENSMUSG00000011008 | 217  | 0.04 | 0.07 | 0.12 | 0.11 | 0.08 | 0.17 |

|      |           |           |               |                     |      |      |      |      |      |      |      |
|------|-----------|-----------|---------------|---------------------|------|------|------|------|------|------|------|
| chr3 | 157699263 | 157699898 | Srsf11        | ENSMUSG00000055436  | -20  | 0.12 | 0.09 | 0.09 | 0.1  | 0.06 | 0.1  |
| chr3 | 36512061  | 36512505  | Bbs7          | ENSMUSG00000037325  | -76  | 0.19 | 0.21 | 0.11 | 0.17 | 0.13 | 0.09 |
| chr3 | 68297558  | 68299268  | Schip1        | ENSMUSG00000027777  | 283  | 0.13 | 0.31 | 0.1  | 0.14 | 0.18 | 0.13 |
| chr3 | 104591558 | 104592117 | Rhoc          | ENSMUSG00000002233  | -92  | 0.16 | 0.17 | 0.11 | 0.15 | 0.11 | 0.18 |
| chr3 | 108374531 | 108374780 | Taf13         | ENSMUSG00000048100  | 39   | 0.5  | 0.1  | 0.1  | 0.16 | 0.12 | 0.18 |
| chr3 | 142428034 | 142428557 | Gtf2b         | ENSMUSG00000028271  | 105  | 0.24 | 0.4  | 0.12 | 0.19 | 0.12 | 0.09 |
| chr3 | 51200298  | 51200541  | 4930583H14Rik | ENSMUSG000000037161 | -9   | 0.07 | 0.17 | 0.16 | 1    | 0.17 | 0.33 |
| chr3 | 108218390 | 108219029 | Celsr2        | ENSMUSG00000068740  | -297 | 0.22 | 0.14 | 0.14 | 0.12 | 0.14 | 0.15 |
| chr3 | 138151899 | 138152792 | Metap1        | ENSMUSG00000005813  | 1    | 0.12 | 0.17 | 0.11 | 0.14 | 0.17 | 0.17 |
| chr3 | 142544114 | 142545492 | Pkn2          | ENSMUSG00000004591  | -181 | 0.2  | 0.18 | 0.08 | 0.18 | 0.14 | 0.14 |
| chr3 | 152058666 | 152059815 | Zzz3          | ENSMUSG00000039068  | 273  | 0.07 | 0.09 | 0.09 | 0.11 | 0.09 | 0.09 |
| chr3 | 8923456   | 8923964   | Mrps28        | ENSMUSG00000040269  | 208  | 0.87 | NA   | 0.12 | 0.27 | 0.5  | 0.18 |
| chr3 | 96962509  | 96963350  | Acp6          | ENSMUSG00000028093  | 229  | 0.17 | 0.08 | 0.11 | 0.19 | 0.04 | 0.2  |
| chr3 | 107498816 | 107499640 | Ahcyl1        | ENSMUSG00000027893  | -347 | 0.34 | 0.3  | 0.14 | 0.17 | 0.24 | 0.31 |
| chr3 | 142364056 | 142364266 | Ccbl2         | ENSMUSG00000040213  | 103  | 0.08 | 0.54 | 0.14 | 0.24 | 0.18 | 0.18 |
| chr3 | 79432517  | 79433296  | Etfdh         | ENSMUSG00000027809  | -301 | 0.15 | 0.3  | 0.1  | 0.13 | 0.32 | 0.15 |
| chr3 | 87774942  | 87775885  | Nes           | ENSMUSG00000004891  | 413  | 0.21 | 0.24 | 0.17 | 0.15 | 0.15 | 0.13 |
| chr3 | 130432784 | 130433469 | Rpl34         | ENSMUSG00000062006  | 126  | 0.2  | 0.23 | 0.18 | 0.16 | 0.11 | 0.22 |
| chr3 | 41367311  | 41367880  | Phf17         | ENSMUSG00000025764  | -78  | 0.28 | 0.37 | 0.11 | 0.26 | 0.38 | 0.16 |
| chr3 | 57378790  | 57380486  | Wwtr1         | ENSMUSG00000027803  | 112  | 0.11 | 0.13 | 0.09 | 0.14 | 0.08 | 0.15 |
| chr3 | 96072590  | 96073030  | Hist2h3b      | ENSMUSG00000074403  | 233  | 1    | NA   | 0.23 | NA   | 0.5  | 0.14 |
| chr3 | 104555894 | 104556215 | Gm6485        | ENSMUSG00000089999  | 29   | 0.77 | 0.89 | 0.5  | 0.43 | 1    | 0.56 |
| chr3 | 58218543  | 58221129  | Tsc22d2       | ENSMUSG00000027806  | 399  | 0.14 | 0.12 | 0.09 | 0.14 | 0.12 | 0.12 |
| chr3 | 94846257  | 94846578  | Psmc4         | ENSMUSG00000005625  | 48   | 0.07 | 0.3  | 0.1  | 0.12 | 0.14 | 0.08 |
| chr3 | 146067369 | 146068029 | Ssx2ip        | ENSMUSG00000036825  | 93   | 0.18 | 0.05 | 0.08 | 0.14 | 0.1  | 0.13 |
| chr3 | 35652793  | 35653643  | Atp11b        | ENSMUSG00000037400  | 162  | 0.06 | 0.12 | 0.08 | 0.17 | 0.08 | 0.12 |
| chr3 | 145883777 | 145884387 | Lpar3         | ENSMUSG00000036832  | 157  | 0.08 | 0.11 | 0.16 | 0.1  | 0.06 | 0.15 |
| chr3 | 146183789 | 146183991 | Rpf1          | ENSMUSG00000028187  | 497  | 0.21 | 0.21 | 0.1  | 0.12 | 0.08 | 0.24 |
| chr3 | 19088029  | 19088573  | Mtfr1         | ENSMUSG00000027601  | 191  | 0.1  | 0.15 | 0.12 | 0.16 | 0.13 | 0.11 |
| chr3 | 102975568 | 102975908 | Bcas2         | ENSMUSG00000005687  | 160  | 0.08 | 0.08 | 0.1  | 0.17 | 0.14 | 0.14 |

|      |           |           |            |                    |      |      |      |      |      |      |      |
|------|-----------|-----------|------------|--------------------|------|------|------|------|------|------|------|
| chr3 | 105261827 | 105262170 | Kcnd3      | ENSMUSG00000040896 | 298  | 0.85 | 0.89 | 0.91 | 0.95 | 1    | 0.97 |
| chr3 | 105761792 | 105762735 | Atp5f1     | ENSMUSG00000000563 | -99  | 0.11 | 0.1  | 0.12 | 0.18 | 0.07 | 0.18 |
| chr3 | 31208400  | 31208977  | Slc7a14    | ENSMUSG00000069072 | 612  | 0.14 | 0.11 | 0.16 | 0.26 | 0.04 | 0.15 |
| chr3 | 86723515  | 86724919  | Dclk2      | ENSMUSG00000028078 | 40   | 0.1  | 0.21 | 0.09 | 0.14 | 0.13 | 0.13 |
| chr3 | 98186125  | 98186539  | Zfp697     | ENSMUSG00000050064 | -72  | 0.08 | 0.07 | 0.11 | 0.24 | 0.14 | 0.13 |
| chr3 | 116297411 | 116298341 | Ccdc76     | ENSMUSG00000033439 | -290 | 0.07 | 0.21 | 0.17 | 0.19 | 0.28 | 0.22 |
| chr3 | 121948176 | 121949188 | Gclm       | ENSMUSG00000028124 | 207  | 0.09 | 0.11 | 0.11 | 0.1  | 0.07 | 0.14 |
| chr3 | 14886138  | 14887025  | Car2       | ENSMUSG00000027562 | 155  | 0.09 | 0.21 | 0.11 | 0.17 | 0.11 | 0.16 |
| chr3 | 57455346  | 57455729  | Commd2     | ENSMUSG00000036513 | 78   | 0.08 | 0.55 | 0.11 | 0.12 | 0.3  | 0.13 |
| chr3 | 66789518  | 66790059  | Rsrc1      | ENSMUSG00000034544 | 196  | 0.25 | 0.22 | 0.13 | 0.14 | 0.1  | 0.26 |
| chr3 | 109945608 | 109946820 | Ntng1      | ENSMUSG00000050836 | 715  | 0.17 | 0.2  | 0.07 | 0.11 | 0.07 | 0.14 |
| chr3 | 123149696 | 123150484 | Prss12     | ENSMUSG00000027978 | 259  | 0.08 | 0.17 | 0.08 | 0.15 | 0.13 | 0.14 |
| chr3 | 60304868  | 60305632  | Mbnl1      | ENSMUSG00000027763 | 76   | 0.18 | 0.16 | 0.11 | 0.15 | 0.14 | 0.13 |
| chr3 | 90024645  | 90024871  | Rab13      | ENSMUSG00000027935 | 49   | 0.09 | 0.12 | 0.11 | 0.18 | 0.25 | 0.17 |
| chr3 | 68808742  | 68810241  | Smc4       | ENSMUSG00000034349 | 599  | 0.17 | 0.11 | 0.1  | 0.11 | 0.11 | 0.11 |
| chr3 | 88306577  | 88307223  | Lmna       | ENSMUSG00000028063 | 329  | 0.13 | 0.13 | 0.1  | 0.14 | 0.08 | 0.11 |
| chr3 | 89883460  | 89884370  | Tpm3       | ENSMUSG00000027940 | 453  | 0.14 | 0.22 | 0.14 | 0.21 | 0.2  | 0.14 |
| chr3 | 130974623 | 130975039 | Hadh       | ENSMUSG00000027984 | 111  | 0.14 | NA   | 0.12 | 0.15 | 0.22 | 0.13 |
| chr3 | 9833090   | 9833701   | Pag1       | ENSMUSG00000027508 | -32  | 0.21 | 0.12 | 0.12 | 0.1  | 0.17 | 0.15 |
| chr3 | 40512620  | 40513163  | Slc25a31   | ENSMUSG00000069041 | 114  | 0.96 | 0.96 | 0.92 | 1    | 0.91 | 0.95 |
| chr3 | 53266984  | 53267931  | Nhlrc3     | ENSMUSG00000042997 | -244 | 0.08 | 0.1  | 0.08 | 0.11 | 0.06 | 0.13 |
| chr3 | 19210693  | 19211848  | Pde7a      | ENSMUSG00000069094 | -367 | 0.12 | 0.08 | 0.07 | 0.12 | 0.09 | 0.09 |
| chr3 | 87421039  | 87421720  | AC139241.1 | ENSMUSG00000093230 | 58   | 0.11 | 0.16 | 0.11 | 0.13 | 0.09 | 0.17 |
| chr3 | 126299521 | 126300529 | Camk2d     | ENSMUSG00000053819 | 156  | 0.26 | 0.16 | 0.09 | 0.16 | 0.19 | 0.11 |
| chr3 | 129533562 | 129534580 | Gar1       | ENSMUSG00000028010 | -312 | 0.14 | 0.19 | 0.09 | 0.21 | 0.22 | 0.1  |
| chr3 | 67177863  | 67178279  | Mif1       | ENSMUSG00000048416 | 52   | 0.27 | 0.15 | 0.1  | 0.11 | 0.1  | 0.16 |
| chr3 | 107989071 | 107989654 | Amigo1     | ENSMUSG00000050947 | 109  | 0.06 | 0.09 | 0.09 | 0.11 | 0.09 | 0.1  |
| chr3 | 137286603 | 137286883 | Ddit4l     | ENSMUSG00000046818 | 107  | 0.07 | 0.14 | 0.1  | 0.13 | 0.15 | 0.15 |
| chr3 | 157694295 | 157694794 | Srsf11     | ENSMUSG00000055436 | -125 | 0.26 | 0.21 | 0.1  | 0.14 | 0.21 | 0.15 |
| chr3 | 37247745  | 37248042  | Fgf2       | ENSMUSG00000037225 | 318  | 0.11 | 0.06 | 0.08 | 0.09 | 0.05 | 0.09 |

|      |           |           |          |                     |      |      |      |      |      |      |      |
|------|-----------|-----------|----------|---------------------|------|------|------|------|------|------|------|
| chr3 | 89518931  | 89519619  | Adar     | ENSMUSG00000027951  | 331  | 0.38 | 0.11 | 0.18 | 0.3  | 0.21 | 0.12 |
| chr3 | 153992266 | 153992999 | Lhx8     | ENSMUSG00000028201  | 391  | 0.21 | 0.21 | 0.17 | 0.2  | 0.42 | 0.25 |
| chr3 | 94690402  | 94690880  | Psemb4   | ENSMUSG00000005779  | 26   | 0.1  | 0.25 | 0.12 | 0.16 | 0.14 | 0.15 |
| chr3 | 116510850 | 116511249 | Agl      | ENSMUSG000000033400 | -100 | 0.09 | 0.33 | 0.08 | 0.14 | 0.12 | 0.09 |
| chr3 | 96132062  | 96132337  | U1       | ENSMUSG000000075978 | -149 | 0.07 | 0.04 | 0.1  | 0.33 | 0.14 | 0.15 |
| chr3 | 100725922 | 100726483 | Trim45   | ENSMUSG000000033233 | 77   | 0.08 | 0.11 | 0.1  | 0.13 | 0.05 | 0.16 |
| chr3 | 141127831 | 141128714 | Gm15688  | ENSMUSG000000089737 | 25   | 0.43 | 0.14 | 0.13 | 0.19 | 0.8  | 0.16 |
| chr3 | 89195794  | 89196594  | Gm15417  | ENSMUSG000000074466 | 302  | 0.53 | 0.49 | 0.16 | 0.31 | 0.44 | 0.26 |
| chr3 | 134492228 | 134492597 | Tacr3    | ENSMUSG000000028172 | 441  | 0.2  | 0.07 | 0.15 | 0.09 | 0.04 | 0.12 |
| chr3 | 158224266 | 158225268 | Lrrc7    | ENSMUSG000000028176 | -447 | 0.13 | 0.29 | 0.16 | 0.11 | 0.19 | 0.14 |
| chr3 | 69402272  | 69402957  | B3galnt1 | ENSMUSG000000043300 | 169  | 0.13 | 0.19 | 0.09 | 0.19 | 0.06 | 0.15 |
| chr3 | 88981335  | 88981592  | Scamp3   | ENSMUSG000000028049 | 68   | 0.19 | NA   | 0.12 | 0.25 | 0.26 | 0.17 |
| chr3 | 89070279  | 89070574  | Dpm3     | ENSMUSG000000042737 | -48  | 0.38 | 0.28 | 0.16 | 0.19 | 0.14 | 0.12 |
| chr3 | 89634872  | 89635842  | She      | ENSMUSG000000046280 | 65   | 0.11 | 0.12 | 0.12 | 0.13 | 0.09 | 0.12 |
| chr3 | 58329167  | 58330068  | Eif2a    | ENSMUSG000000027810 | -126 | 0.11 | 0.18 | 0.09 | 0.14 | 0.09 | 0.13 |
| chr3 | 58495491  | 58496548  | Siah2    | ENSMUSG000000036432 | 266  | 0.12 | 0.15 | 0.11 | 0.14 | 0.11 | 0.13 |
| chr3 | 88136889  | 88137160  | Tmem79   | ENSMUSG00000001420  | 1166 | 0.72 | 0.89 | 0.73 | 0.65 | 0.79 | 0.84 |
| chr3 | 89153743  | 89154409  | Adam15   | ENSMUSG000000028041 | -195 | 0.11 | 0.11 | 0.1  | 0.15 | 0.14 | 0.12 |
| chr3 | 89855970  | 89857033  | Ubap2l   | ENSMUSG000000042520 | -104 | 0.1  | 0.11 | 0.13 | 0.14 | 0.21 | 0.19 |
| chr3 | 100913575 | 100914648 | Ptgfrn   | ENSMUSG000000027864 | -10  | 0.11 | 0.13 | 0.1  | 0.15 | 0.09 | 0.13 |
| chr3 | 108186511 | 108186868 | Gm12522  | ENSMUSG000000074281 | -30  | 0.1  | 0.25 | 0.13 | 0.2  | 0.19 | 0.15 |
| chr3 | 55591426  | 55591722  | Nbea     | ENSMUSG000000027799 | -750 | 0.13 | 0.29 | 0.08 | 0.12 | 0.08 | 0.09 |
| chr3 | 67233963  | 67234492  | Gfm1     | ENSMUSG000000027774 | 209  | 0.13 | 0.22 | 0.24 | 0.2  | 0.3  | 0.26 |
| chr3 | 146347959 | 146348513 | Samd13   | ENSMUSG000000048652 | 199  | 0.05 | 0.11 | 0.09 | 0.15 | 0.09 | 0.17 |
| chr3 | 30501272  | 30501938  | Mynn     | ENSMUSG000000037730 | 596  | 0.1  | 0.14 | 0.11 | 0.16 | 0.13 | 0.12 |
| chr3 | 32607293  | 32608324  | Actl6a   | ENSMUSG000000027671 | 340  | 0.15 | 0.15 | 0.14 | 0.19 | 0.19 | 0.16 |
| chr3 | 81877707  | 81878056  | Gucy1b3  | ENSMUSG000000028005 | 752  | 0.08 | 0.11 | 0.16 | 0.25 | 0.2  | 0.09 |
| chr3 | 31048630  | 31049146  | Cldn11   | ENSMUSG000000037625 | 20   | 0.17 | 0.11 | 0.08 | 0.1  | 0.11 | 0.12 |
| chr3 | 37538668  | 37540071  | Spry1    | ENSMUSG000000037211 | 500  | 0.07 | 0.14 | 0.1  | 0.13 | 0.09 | 0.1  |
| chr3 | 27270689  | 27271468  | Ghsr     | ENSMUSG000000051136 | 805  | 0.21 | 0.12 | 0.11 | 0.11 | 0.12 | 0.19 |



|      |           |           |               |                    |      |      |      |      |      |      |      |
|------|-----------|-----------|---------------|--------------------|------|------|------|------|------|------|------|
| chr3 | 54719678  | 54719989  | 6030405A18Rik | ENSMUSG00000056306 | -24  | 0.18 | 0.07 | 0.07 | 0.14 | 0.08 | 0.14 |
| chr3 | 151928357 | 151928895 | Nexn          | ENSMUSG00000039103 | 658  | 0.25 | 0.16 | 0.11 | 0.18 | 0.13 | 0.35 |
| chr3 | 88340158  | 88340940  | Mir1905       | ENSMUSG00000084728 | -245 | 0.3  | 0.26 | 0.13 | 0.19 | 0.25 | 0.23 |
| chr3 | 135100796 | 135102752 | Ube2d3        | ENSMUSG00000078578 | 513  | 0.13 | 0.15 | 0.13 | 0.16 | 0.16 | 0.17 |
| chr3 | 32635222  | 32636469  | Ndufb5        | ENSMUSG00000027673 | -67  | 0.12 | 0.42 | 0.18 | 0.12 | 1    | 0.12 |
| chr3 | 85691051  | 85691853  | Arfp1         | ENSMUSG00000074513 | -162 | 0.16 | 0.23 | 0.14 | 0.16 | 0.2  | 0.14 |
| chr3 | 32515182  | 32515855  | Gnb4          | ENSMUSG00000027669 | -79  | 0.09 | 0.13 | 0.07 | 0.16 | 0.05 | 0.1  |
| chr3 | 34547751  | 34550288  | Sox2          | ENSMUSG00000074637 | 92   | 0.14 | 0.15 | 0.1  | 0.17 | 0.12 | 0.15 |
| chr3 | 108086592 | 108087215 | Sort1         | ENSMUSG00000068747 | -106 | 0.16 | 0.13 | 0.1  | 0.13 | 0.12 | 0.11 |
| chr3 | 87710015  | 87710948  | Hdgf          | ENSMUSG0000004897  | 238  | 0.07 | 0.14 | 0.15 | 0.13 | 0.08 | 0.13 |
| chr3 | 88335447  | 88336054  | Mex3a         | ENSMUSG00000074480 | -567 | 0.2  | 0.11 | 0.26 | 0.12 | 0.09 | 0.15 |
| chr3 | 89123549  | 89125938  | Efna3         | ENSMUSG00000028039 | 810  | 0.11 | 0.22 | 0.12 | 0.15 | 0.09 | 0.18 |
| chr3 | 89141557  | 89141933  | 4731419I09Rik | ENSMUSG00000091513 | -27  | 0.56 | 0.51 | 0.11 | 0.17 | 0.32 | 0.15 |
| chr3 | 96073599  | 96074029  | Hist2h2bb     | ENSMUSG00000050936 | 170  | 0.11 | 0.07 | 0.15 | 0.16 | 0.15 | 0.14 |
| chr3 | 54538524  | 54539626  | Exosc8        | ENSMUSG00000027752 | -351 | 0.11 | 0.3  | 0.12 | 0.15 | 0.14 | 0.11 |
| chr3 | 88424942  | 88425649  | RP23-398K14.3 | ENSMUSG00000093390 | -312 | 0.11 | 0.24 | 0.12 | 0.16 | 0.14 | 0.18 |
| chr3 | 89766994  | 89767400  | Atp8b2        | ENSMUSG00000060671 | -161 | 0.06 | 0.08 | 0.13 | 0.08 | 0.11 | 0.14 |
| chr3 | 90069034  | 90069862  | Dennd4b       | ENSMUSG00000042404 | 341  | 0.24 | 0.17 | 0.11 | 0.27 | 0.19 | 0.17 |
| chr3 | 95118934  | 95119615  | Lass2         | ENSMUSG00000015714 | 268  | 0.21 | 0.11 | 0.15 | 0.08 | 0.16 | 0.12 |
| chr3 | 97571766  | 97572068  | Pde4dip       | ENSMUSG00000038170 | -63  | 0.11 | 0.05 | 0.09 | 0.23 | 0.04 | 0.2  |
| chr3 | 131005501 | 131006263 | 4930534D22Rik | ENSMUSG00000091852 | 321  | 0.08 | 0.11 | 0.09 | 0.11 | 0.19 | 0.14 |
| chr3 | 137530545 | 137531004 | Dnajb14       | ENSMUSG00000074212 | 135  | 0.12 | 0.08 | 0.08 | 0.08 | 0.09 | 0.1  |
| chr3 | 146184121 | 146184454 | Rpf1          | ENSMUSG00000028187 | 100  | 0.13 | 0.11 | 0.2  | 0.25 | 0.07 | 0.14 |
| chr3 | 30406549  | 30408299  | Mecom         | ENSMUSG00000027684 | 985  | 0.16 | 0.4  | 0.12 | 0.15 | 0.2  | 0.22 |
| chr3 | 32264212  | 32264742  | Zmat3         | ENSMUSG00000027663 | -95  | 0.07 | 0.08 | 0.07 | 0.24 | 0.05 | 0.12 |
| chr3 | 40548941  | 40549784  | Hspa4l        | ENSMUSG00000025757 | 58   | 0.1  | 0.11 | 0.11 | 0.15 | 0.07 | 0.12 |
| chr3 | 30993013  | 30994617  | Skil          | ENSMUSG00000027660 | -165 | 0.11 | 0.09 | 0.1  | 0.12 | 0.09 | 0.12 |
| chr3 | 65469953  | 65470654  | Lekr1         | ENSMUSG00000074579 | 153  | 0.06 | 0.18 | 0.12 | 0.19 | 0.13 | 0.13 |
| chr3 | 82931163  | 82933157  | Gm10710       | ENSMUSG00000074517 | 1008 | 0.11 | 0.12 | 0.11 | 0.16 | 0.09 | 0.13 |
| chr3 | 57539542  | 57540268  | Rnf13         | ENSMUSG00000036503 | -88  | 0.11 | 0.1  | 0.07 | 0.15 | 0.08 | 0.12 |

|      |           |           |               |                    |      |      |      |      |      |      |      |
|------|-----------|-----------|---------------|--------------------|------|------|------|------|------|------|------|
| chr3 | 94910270  | 94910938  | Pip5k1a       | ENSMUSG00000028126 | 97   | 0.11 | 0.16 | 0.12 | 0.19 | 0.17 | 0.14 |
| chr3 | 102799597 | 102799953 | Sike1         | ENSMUSG00000027854 | 124  | 0.06 | 0.13 | 0.1  | 0.11 | 0.08 | 0.13 |
| chr3 | 19062701  | 19063059  | Armc1         | ENSMUSG00000027599 | 185  | 0.31 | 0.31 | 0.12 | 0.29 | 0.25 | 0.32 |
| chr3 | 83843286  | 83844675  | D930015E06Rik | ENSMUSG00000033767 | 103  | 0.11 | 0.19 | 0.08 | 0.11 | 0.09 | 0.1  |
| chr3 | 41546092  | 41546597  | Sc11          | ENSMUSG00000059834 | 59   | 0.14 | 0.21 | 0.12 | 0.17 | 0.09 | 0.17 |
| chr3 | 82161960  | 82162392  | Mtap9         | ENSMUSG00000033900 | 182  | 0.08 | 0.17 | 0.1  | 0.1  | 0.12 | 0.12 |
| chr3 | 106838760 | 106840045 | Kcna3         | ENSMUSG00000047959 | 322  | 0.1  | 0.09 | 0.08 | 0.13 | 0.09 | 0.13 |
| chr3 | 135353847 | 135354599 | Nfkb1         | ENSMUSG00000028163 | 287  | 0.12 | 0.14 | 0.1  | 0.14 | 0.14 | 0.16 |
| chr3 | 154259592 | 154260168 | Cryz          | ENSMUSG00000028199 | 205  | 0.15 | 0.14 | 0.11 | 0.17 | 0.07 | 0.13 |
| chr3 | 65761374  | 65762518  | Ccn1          | ENSMUSG00000027829 | -371 | 0.08 | 0.09 | 0.09 | 0.13 | 0.1  | 0.13 |
| chr3 | 75360263  | 75360818  | Pdcd10        | ENSMUSG00000027835 | 141  | 0.16 | 0.54 | 0.11 | 0.16 | 0.21 | 0.12 |
| chr3 | 87826445  | 87828000  | Hapln2        | ENSMUSG0000004894  | 373  | 0.11 | 0.14 | 0.09 | 0.19 | 0.12 | 0.13 |
| chr3 | 145600890 | 145601549 | 2410004B18Rik | ENSMUSG00000036873 | 241  | 0.08 | 0.13 | 0.11 | 0.19 | 0.07 | 0.13 |
| chr3 | 52820793  | 52821227  | Cog6          | ENSMUSG00000027742 | 128  | 0.11 | 0.08 | 0.11 | 0.13 | 0.15 | 0.12 |
| chr3 | 84386261  | 84387089  | Arfp1         | ENSMUSG00000074513 | -268 | 0.13 | 0.19 | 0.14 | 0.18 | 0.11 | 0.15 |
| chr3 | 28981311  | 28981940  | Egfm1         | ENSMUSG00000063600 | 126  | 0.19 | 0.2  | 0.08 | 0.14 | 0.21 | 0.13 |
| chr3 | 51079876  | 51081592  | Elf2          | ENSMUSG00000037174 | 553  | 0.11 | 0.18 | 0.1  | 0.14 | 0.12 | 0.14 |
| chr3 | 63702606  | 63703083  | Plch1         | ENSMUSG00000036834 | 451  | 0.14 | 0.2  | 0.13 | 0.14 | 0.09 | 0.12 |
| chr3 | 128902642 | 128903291 | Pitx2         | ENSMUSG00000028023 | 170  | 0.38 | 0.56 | 0.23 | 0.18 | 0.27 | 0.29 |
| chr3 | 10012269  | 10012608  | Fabp5         | ENSMUSG00000027533 | -110 | 0.1  | 0.1  | 0.09 | 0.12 | 0.17 | 0.17 |
| chr3 | 60806505  | 60807322  | P2ry1         | ENSMUSG00000027765 | 196  | 0.1  | 0.13 | 0.09 | 0.1  | 0.08 | 0.11 |
| chr3 | 104583683 | 104584792 | Ppm1j         | ENSMUSG0000002228  | 263  | 0.11 | 0.16 | 0.11 | 0.16 | 0.09 | 0.15 |
| chr3 | 104667197 | 104668255 | Capza1        | ENSMUSG00000070372 | -435 | 0.13 | 0.14 | 0.1  | 0.18 | 0.16 | 0.17 |
| chr3 | 136332435 | 136334646 | Ppp3ca        | ENSMUSG00000028161 | 452  | 0.1  | 0.1  | 0.09 | 0.12 | 0.11 | 0.13 |
| chr3 | 152377020 | 152377567 | Pigk          | ENSMUSG00000039047 | 229  | 0.13 | 0.12 | 0.12 | 0.16 | 0.1  | 0.12 |
| chr3 | 7612873   | 7613165   | Ii7           | ENSMUSG00000040329 | -126 | 0.17 | NA   | 0.12 | 0.16 | 0.5  | 0.09 |
| chr3 | 14578450  | 14579227  | E2f5          | ENSMUSG00000027552 | 167  | 0.13 | 0.27 | 0.17 | 0.11 | 0.11 | 0.18 |
| chr3 | 52845282  | 52845727  | Lhfp          | ENSMUSG00000048332 | 54   | 0.11 | 0.28 | 0.1  | 0.12 | 0.07 | 0.18 |
| chr3 | 94964233  | 94965518  | Sema6c        | ENSMUSG00000038777 | 496  | 0.59 | 0.75 | 0.15 | 0.19 | 0.75 | 0.22 |
| chr3 | 108003385 | 108003879 | Cyb561d1      | ENSMUSG00000048796 | -119 | 0.14 | 0.28 | 0.08 | 0.2  | 0.11 | 0.21 |

|      |           |           |               |                    |      |      |      |      |      |      |      |
|------|-----------|-----------|---------------|--------------------|------|------|------|------|------|------|------|
| chr3 | 108042625 | 108042911 | Gm12501       | ENSMUSG00000083462 | 61   | 0.83 | 0.4  | 0.64 | 0.86 | 1    | 0.86 |
| chr3 | 108059692 | 108060492 | Psm5          | ENSMUSG00000068749 | 248  | 0.26 | 0.41 | 0.12 | 0.19 | 0.31 | 0.17 |
| chr3 | 116364857 | 116365663 | Hiat1         | ENSMUSG00000089911 | 149  | 0.05 | 0.08 | 0.11 | 0.11 | 0.07 | 0.12 |
| chr3 | 95908196  | 95908825  | Otud7b        | ENSMUSG00000038495 | 60   | 0.15 | 0.08 | 0.11 | 0.18 | 0.12 | 0.16 |
| chr3 | 148650594 | 148653608 | Lphn2         | ENSMUSG00000028184 | 179  | 0.12 | 0.15 | 0.11 | 0.16 | 0.11 | 0.13 |
| chr3 | 88018383  | 88019521  | Gm3764        | ENSMUSG00000091070 | 545  | 0.13 | 0.25 | 0.11 | 0.16 | 0.15 | 0.15 |
| chr3 | 117278201 | 117278841 | 4833424O15Rik | ENSMUSG00000033342 | 243  | 0.21 | 0.15 | 0.12 | 0.12 | 0.16 | 0.15 |
| chr3 | 132612425 | 132613187 | Npnt          | ENSMUSG00000040998 | -28  | 0.08 | 0.07 | 0.1  | 0.12 | 0.07 | 0.11 |
| chr3 | 96500233  | 96501386  | Pias3         | ENSMUSG00000028101 | 502  | 0.26 | 0.2  | 0.14 | 0.18 | 0.23 | 0.17 |
| chr3 | 121235005 | 121235375 | Slc44a3       | ENSMUSG00000039865 | 72   | 0.12 | 0.13 | 0.15 | 0.14 | 0.1  | 0.18 |
| chr3 | 53667543  | 53667801  | Ufm1          | ENSMUSG00000027746 | -61  | 0.17 | 0.15 | 0.12 | 0.21 | 0.24 | 0.22 |
| chr3 | 108642902 | 108643576 | Stxbp3a       | ENSMUSG00000027882 | 189  | 0.18 | 0.31 | 0.12 | 0.11 | 0.12 | 0.18 |
| chr3 | 9250021   | 9251819   | Zbtb10        | ENSMUSG00000069114 | 318  | 0.12 | 0.13 | 0.1  | 0.13 | 0.13 | 0.16 |
| chr3 | 101407941 | 101409125 | Atp1a1        | ENSMUSG00000033161 | -7   | 0.06 | 0.09 | 0.08 | 0.09 | 0.07 | 0.14 |
| chr3 | 35831264  | 35832076  | Dcun1d1       | ENSMUSG00000027708 | 67   | 0.11 | 0.16 | 0.09 | 0.15 | 0.12 | 0.13 |
| chr3 | 80717188  | 80717682  | Girb          | ENSMUSG00000028020 | 15   | 0.09 | 0.17 | 0.19 | 0.14 | 0.11 | 0.15 |
| chr3 | 103083172 | 103084507 | Trim33        | ENSMUSG00000033014 | 623  | 0.1  | 0.15 | 0.1  | 0.11 | 0.09 | 0.12 |
| chr3 | 127492753 | 127493014 | Tifa          | ENSMUSG00000046688 | 93   | 0.09 | 0.11 | 0.08 | 0.21 | 0.15 | 0.17 |
| chr3 | 84063159  | 84063842  | Trim2         | ENSMUSG00000027993 | -209 | 0.35 | 0.22 | 0.16 | 0.14 | 0.27 | 0.18 |
| chr3 | 33918465  | 33919741  | Fxr1          | ENSMUSG00000027680 | 102  | 0.1  | 0.09 | 0.11 | 0.13 | 0.11 | 0.09 |
| chr3 | 96401354  | 96402738  | Ankrd34a      | ENSMUSG00000049097 | 641  | 0.1  | 0.09 | 0.13 | 0.19 | 0.11 | 0.16 |
| chr3 | 132347040 | 132347316 | Tbck          | ENSMUSG00000028030 | 70   | 0.16 | 0.43 | 0.12 | 0.25 | 0.09 | 0.11 |
| chr3 | 145586965 | 145587958 | Bcl10         | ENSMUSG00000028191 | 139  | 0.1  | 0.16 | 0.15 | 0.13 | 0.12 | 0.12 |
| chr3 | 122122772 | 122123151 | Bcar3         | ENSMUSG00000028121 | 263  | 0.15 | 0.22 | 0.08 | 0.21 | 0.12 | 0.12 |
| chr3 | 63733031  | 63733385  | E130311K13Rik | ENSMUSG00000048581 | 105  | 0.11 | 0.08 | 0.09 | 0.11 | 0.08 | 0.16 |
| chr3 | 156224450 | 156225330 | 4930570G19Rik | ENSMUSG00000085084 | -344 | 0.07 | 0.12 | 0.08 | 0.14 | 0.1  | 0.1  |
| chr3 | 135085883 | 135086575 | Cisd2         | ENSMUSG00000028165 | 142  | 0.18 | 0.15 | 0.11 | 0.14 | 0.16 | 0.1  |
| chr3 | 144781432 | 144782026 | Odf2l         | ENSMUSG00000028256 | 176  | 0.05 | 0.42 | 0.15 | 0.19 | 0.08 | 0.18 |
| chr3 | 89084748  | 89085077  | Efna1         | ENSMUSG00000027954 | 152  | 0.12 | 0.33 | 0.11 | 0.21 | 0.19 | 0.21 |
| chr3 | 130412015 | 130412378 | Ostc          | ENSMUSG00000041084 | 166  | 0.04 | 0.11 | 0.11 | 0.14 | 0.06 | 0.14 |

|      |           |           |               |                    |      |      |      |      |      |      |      |
|------|-----------|-----------|---------------|--------------------|------|------|------|------|------|------|------|
| chr3 | 90035418  | 90035919  | Jtb           | ENSMUSG00000027937 | 149  | 0.22 | 0.2  | 0.16 | 0.14 | 0.27 | 0.13 |
| chr3 | 95032541  | 95032963  | Milt11        | ENSMUSG00000053192 | -153 | 0.12 | 0.14 | 0.13 | 0.21 | 0.14 | 0.12 |
| chr3 | 107398039 | 107400008 | Alx3          | ENSMUSG00000092379 | 1074 | 0.11 | 0.16 | 0.11 | 0.18 | 0.1  | 0.15 |
| chr3 | 123393624 | 123394017 | Ndst3         | ENSMUSG00000027977 | -85  | 0.24 | 0.18 | 0.14 | 0.12 | 0.19 | 0.14 |
| chr3 | 129581419 | 129581979 | Pla2g12a      | ENSMUSG00000027999 | 175  | 0.04 | 0.14 | 0.06 | 0.09 | 0.09 | 0.12 |
| chr3 | 83593699  | 83593964  | Gm16790       | ENSMUSG00000085848 | 47   | 0.09 | 0.08 | 0.1  | 0.16 | 0.06 | 0.2  |
| chr3 | 90313112  | 90313591  | 2500003M10Rik | ENSMUSG00000001017 | 21   | 0.25 | 0.24 | 0.16 | 0.22 | 0.18 | 0.13 |
| chr3 | 106350243 | 106351093 | Cept1         | ENSMUSG00000040774 | -168 | 0.18 | 0.2  | 0.12 | 0.13 | 0.16 | 0.13 |
| chr3 | 97671855  | 97672287  | Pde4dip       | ENSMUSG00000038170 | 49   | 0.2  | 0.14 | 0.12 | 0.22 | 0.06 | 0.08 |
| chr3 | 19935027  | 19935372  | Hps3          | ENSMUSG00000027615 | 81   | 0.08 | 0.12 | 0.08 | 0.15 | 0.1  | 0.11 |
| chr3 | 37211293  | 37211724  | Cetn4         | ENSMUSG00000045031 | -166 | 0.61 | 1    | 0.33 | 0.36 | 0.52 | 0.29 |
| chr3 | 117571681 | 117571959 | Snx7          | ENSMUSG00000028007 | -81  | 0.67 | 1    | 0.29 | 0.09 | 0.53 | 0.27 |
| chr3 | 129763123 | 129764005 | Sec24b        | ENSMUSG00000001052 | 261  | 0.11 | 0.15 | 0.08 | 0.11 | 0.13 | 0.15 |
| chr3 | 94216412  | 94217433  | 1700040D17Rik | ENSMUSG00000090420 | -117 | 0.07 | NA   | 0.07 | 0.16 | 0.03 | 0.14 |
| chr3 | 146162266 | 146163420 | Spata1        | ENSMUSG00000028188 | -126 | 0.07 | 0.13 | 0.09 | 0.1  | 0.07 | 0.12 |
| chr3 | 83569853  | 83570952  | Sfrp2         | ENSMUSG00000027996 | 159  | 0.08 | 0.1  | 0.1  | 0.15 | 0.07 | 0.14 |
| chr3 | 95622575  | 95623825  | Rprd2         | ENSMUSG00000028106 | -499 | 0.33 | 0.5  | 0.11 | 0.16 | 0.12 | 0.19 |
| chr3 | 108456798 | 108457148 | Clcc1         | ENSMUSG00000027884 | 142  | 0.1  | 0.16 | 0.09 | 0.18 | 0.08 | 0.09 |
| chr3 | 96361600  | 96361876  | Gm15441       | ENSMUSG00000074398 | 0    | 0.33 | 0.33 | 0.12 | 0.28 | 1    | 0.18 |
| chr3 | 108217139 | 108217471 | Celsr2        | ENSMUSG00000068740 | 1107 | 0.96 | 0.96 | 0.93 | 0.96 | 0.94 | 0.98 |
| chr3 | 96042450  | 96044473  | Hist2h3c2     | ENSMUSG00000081058 | -411 | 0.33 | 0.2  | 0.19 | 0.14 | 0.18 | 0.24 |
| chr3 | 104855593 | 104855989 | Cttnbp2nl     | ENSMUSG00000062127 | 80   | 0.16 | 0.3  | 0.11 | 0.11 | 0.14 | 0.11 |
| chr3 | 115710142 | 115710770 | Slc30a7       | ENSMUSG00000054414 | -132 | 0.11 | 0.11 | 0.13 | 0.06 | 0.08 | 0.1  |
| chr3 | 86027679  | 86028872  | Lrba          | ENSMUSG00000028080 | -327 | 0.08 | 0.18 | 0.08 | 0.16 | 0.07 | 0.12 |
| chr3 | 87598788  | 87599211  | Ntrk1         | ENSMUSG00000028072 | 85   | 0.18 | 0.19 | 0.08 | 0.05 | 0.31 | 0.19 |
| chr3 | 95685827  | 95686861  | Gm129         | ENSMUSG00000038550 | -347 | 0.15 | 0.1  | 0.11 | 0.18 | 0.13 | 0.18 |
| chr3 | 102906318 | 102906987 | Dennd2c       | ENSMUSG00000007379 | 125  | 0.08 | 0.14 | 0.07 | 0.12 | 0.1  | 0.07 |
| chr3 | 122970081 | 122971032 | Sec24d        | ENSMUSG00000039234 | 142  | 0.13 | 0.1  | 0.1  | 0.12 | 0.16 | 0.18 |
| chr3 | 131227519 | 131228192 | Papss1        | ENSMUSG00000028032 | 123  | 0.12 | 0.27 | 0.1  | 0.17 | 0.15 | 0.16 |
| chr3 | 72861332  | 72861714  | Slitrk3       | ENSMUSG00000048304 | -658 | 0.17 | 0.67 | 0.2  | 0.06 | 0.33 | 0.16 |

|      |           |           |               |                    |      |      |      |      |      |      |      |
|------|-----------|-----------|---------------|--------------------|------|------|------|------|------|------|------|
| chr3 | 153991028 | 153991784 | Lhx8          | ENSMUSG00000093486 | -275 | 0.07 | 0.07 | 0.06 | 0.13 | 0.06 | 0.13 |
| chr3 | 51363505  | 51365027  | 5031434O11Rik | ENSMUSG00000085462 | 587  | 0.08 | 0.11 | 0.1  | 0.13 | 0.09 | 0.16 |
| chr3 | 58809299  | 58811452  | Med12l        | ENSMUSG00000056476 | -525 | 0.11 | 0.14 | 0.1  | 0.13 | 0.12 | 0.12 |
| chr3 | 63779979  | 63780509  | Gmps          | ENSMUSG00000027823 | 216  | 0.2  | 0.14 | 0.12 | 0.15 | 0.15 | 0.16 |
| chr3 | 88520703  | 88520998  | Rit1          | ENSMUSG00000028057 | 90   | 0.25 | 0.33 | 0.08 | 0.18 | 0.09 | 0.09 |
| chr3 | 107948716 | 107949204 | Gnai3         | ENSMUSG00000000001 | 104  | 0.15 | 0.3  | 0.09 | 0.23 | 0.17 | 0.11 |
| chr3 | 141831847 | 141832539 | Bmpr1b        | ENSMUSG00000052430 | -16  | 0.06 | 0.08 | 0.12 | 0.22 | 0.08 | 0.12 |
| chr3 | 28679954  | 28680743  | 1700112D23Rik | ENSMUSG00000091329 | -318 | 0.19 | 0.18 | 0.12 | 0.2  | 0.18 | 0.18 |
| chr3 | 40753227  | 40754867  | Larp1b        | ENSMUSG00000037814 | -506 | 0.16 | 0.14 | 0.14 | 0.14 | 0.15 | 0.12 |
| chr3 | 57650777  | 57652027  | Pfn2          | ENSMUSG00000027805 | -335 | 0.1  | 0.12 | 0.1  | 0.12 | 0.11 | 0.11 |
| chr3 | 96512268  | 96512539  | Nudt17        | ENSMUSG00000028100 | 80   | 0.13 | 0.12 | 0.13 | 0.18 | 0.11 | 0.18 |
| chr3 | 121995965 | 121997098 | Gm17494       | ENSMUSG00000057359 | -66  | 0.11 | 0.11 | 0.09 | 0.16 | 0.11 | 0.11 |
| chr3 | 87981667  | 87981973  | 1700113A16Rik | ENSMUSG00000086082 | -113 | 0.08 | 0.21 | 0.1  | 0.12 | 0.09 | 0.12 |
| chr3 | 104442018 | 104443363 | Slc16a1       | ENSMUSG00000032902 | 99   | 0.13 | 0.1  | 0.1  | 0.12 | 0.14 | 0.14 |
| chr3 | 94247105  | 94247693  | Mrpl9         | ENSMUSG00000028140 | 159  | 0.16 | 0.3  | 0.13 | 0.16 | 0.18 | 0.19 |
| chr3 | 95733124  | 95734334  | Anp32e        | ENSMUSG00000015749 | 560  | 0.07 | 0.08 | 0.09 | 0.11 | 0.06 | 0.12 |
| chr3 | 98143103  | 98143410  | Phgdh         | ENSMUSG00000053398 | 657  | 0.19 | 0.11 | 0.14 | 0.17 | 0.13 | 0.15 |
| chr3 | 104620546 | 104621057 | Mov10         | ENSMUSG00000002227 | 359  | 0.12 | 0.09 | 0.13 | 0.11 | 0.1  | 0.14 |
| chr3 | 135148217 | 135148810 | Manba         | ENSMUSG00000028164 | -62  | 0.13 | 0.11 | 0.11 | 0.18 | 0.19 | 0.15 |
| chr3 | 96439278  | 96439734  | Pex11b        | ENSMUSG00000028102 | 207  | 0.23 | 0.14 | 0.1  | 0.25 | 0.18 | 0.1  |
| chr3 | 117063010 | 117063232 | D3Bwg0562e    | ENSMUSG00000044667 | 673  | 0.06 | 0.23 | 0.15 | 0.07 | 0.05 | 0.18 |
| chr3 | 101728007 | 101728548 | Slc22a15      | ENSMUSG00000033147 | 99   | 0.06 | 0.16 | 0.09 | 0.11 | 0.07 | 0.08 |
| chr3 | 10439504  | 10440158  | Srx16         | ENSMUSG00000027534 | 269  | 0.13 | 0.08 | 0.1  | 0.18 | 0.12 | 0.14 |
| chr3 | 63099417  | 63100009  | Mme           | ENSMUSG00000027820 | -81  | 0.13 | 0.12 | 0.13 | 0.14 | 0.13 | 0.11 |
| chr3 | 96049154  | 96051222  | Hist2h2aa1    | ENSMUSG00000063954 | 727  | 0.15 | NA   | 0.1  | 0.09 | 0.13 | 0.15 |
| chr3 | 100773326 | 100773628 | Ttf2          | ENSMUSG00000033222 | 109  | 0.12 | 0.07 | 0.14 | 0.14 | 0.1  | 0.17 |
| chr3 | 121656211 | 121656734 | Arhgap29      | ENSMUSG00000039831 | 238  | 0.07 | 0.21 | 0.11 | 0.17 | 0.08 | 0.14 |
| chr3 | 19594032  | 19594513  | Crh           | ENSMUSG00000049796 | 1124 | 1    | 1    | 0.37 | 0.4  | 0.79 | 0.26 |
| chr3 | 65196197  | 65196667  | Ssr3          | ENSMUSG00000027828 | 43   | 0.11 | 0.06 | 0.09 | 0.17 | 0.08 | 0.15 |
| chr3 | 116210676 | 116211149 | Rtcd1         | ENSMUSG00000000339 | 30   | 0.08 | 0.18 | 0.08 | 0.12 | 0.09 | 0.13 |

|      |           |           |                 |                    |      |      |      |      |      |      |      |
|------|-----------|-----------|-----------------|--------------------|------|------|------|------|------|------|------|
| chr3 | 145239108 | 145239412 | Znhit6          | ENSMUSG00000074182 | 88   | 0.06 | 0.06 | 0.06 | 0.19 | 0.03 | 0.09 |
| chr3 | 10331002  | 10331481  | Impa1           | ENSMUSG00000027531 | -109 | 0.26 | 0.17 | 0.13 | 0.25 | 0.25 | 0.12 |
| chr3 | 30691881  | 30692720  | Sec62           | ENSMUSG00000027706 | 502  | 0.08 | 0.12 | 0.08 | 0.16 | 0.08 | 0.13 |
| chr3 | 54858968  | 54859595  | Ccna1           | ENSMUSG00000027793 | -304 | 0.11 | 0.33 | 0.09 | 0.16 | 0.11 | 0.15 |
| chr3 | 90057983  | 90058611  | Crtc2           | ENSMUSG00000027936 | 212  | 0.15 | 0.33 | 0.09 | 0.13 | 0.16 | 0.13 |
| chr3 | 90193049  | 90193967  | Slc27a3         | ENSMUSG00000027932 | 44   | 0.07 | 0.21 | 0.08 | 0.12 | 0.08 | 0.12 |
| chr3 | 14533765  | 14534090  | Lrrcc1          | ENSMUSG00000027550 | 139  | 0.1  | 0.11 | 0.18 | 0.2  | 0.09 | 0.18 |
| chr3 | 88139952  | 88140175  | Smg5            | ENSMUSG00000001415 | -119 | 0.12 | NA   | 0.1  | 0.25 | 0.15 | 0.17 |
| chr3 | 95976069  | 95976697  | Sf3b4           | ENSMUSG00000068856 | 128  | 0.2  | 0.2  | 0.12 | 0.16 | 0.19 | 0.17 |
| chr3 | 121426236 | 121426764 | F3              | ENSMUSG00000028128 | 45   | 0.06 | 0.12 | 0.13 | 0.15 | 0.1  | 0.16 |
| chr3 | 7366450   | 7366795   | Pkia            | ENSMUSG00000027499 | 18   | 0.15 | 0.53 | 0.12 | 0.14 | 0.17 | 0.1  |
| chr3 | 17686168  | 17687096  | Gm10742         | ENSMUSG00000074674 | 266  | 0.2  | 0.24 | 0.12 | 0.15 | 0.18 | 0.2  |
| chr3 | 18143008  | 18143233  | Cyp7b1          | ENSMUSG00000039519 | 218  | 0.08 | NA   | 0.08 | 0.1  | 0.06 | 0.13 |
| chr3 | 19957627  | 19958195  | Hlhf            | ENSMUSG00000002428 | 100  | 0.14 | 0.12 | 0.09 | 0.17 | 0.08 | 0.09 |
| chr3 | 28704235  | 28704681  | Rpl22l1         | ENSMUSG00000039221 | 100  | 0.07 | 0.07 | 0.12 | 0.13 | 0.06 | 0.17 |
| chr3 | 30494104  | 30494553  | Telomerase-vert | ENSMUSG00000065361 | 351  | 0.09 | 0.25 | 0.11 | 0.17 | 0.1  | 0.13 |
| chr3 | 30754755  | 30755325  | Gpr160          | ENSMUSG00000037661 | 168  | 0.17 | 0.59 | 0.1  | 0.17 | 0.17 | 0.18 |
| chr3 | 30894597  | 30895127  | Prkci           | ENSMUSG00000037643 | 193  | 0.1  | 0.25 | 0.08 | 0.14 | 0.1  | 0.08 |
| chr3 | 33041798  | 33042163  | Pex5l           | ENSMUSG00000027674 | 18   | 0.07 | 0.07 | 0.1  | 0.12 | 0.07 | 0.11 |
| chr3 | 33980033  | 33980329  | Dnajc19         | ENSMUSG00000027679 | 3    | 0.07 | NA   | 0.12 | 0.06 | 0.07 | 0.21 |
| chr3 | 35964870  | 35965325  | Acad9           | ENSMUSG00000027710 | 196  | 0.12 | 0.13 | 0.11 | 0.28 | 0.11 | 0.15 |
| chr3 | 36451407  | 36451776  | Exosc9          | ENSMUSG00000027714 | 63   | 0.12 | 0.17 | 0.05 | 0.09 | 0.17 | 0.15 |
| chr3 | 36761923  | 36762459  | 4932438A13Rik   | ENSMUSG00000037270 | 163  | 0.07 | 0.14 | 0.11 | 0.16 | 0.06 | 0.17 |
| chr3 | 38354812  | 38355150  | Ankrd50         | ENSMUSG00000044864 | -502 | 1    | 0.95 | 0.96 | 0.97 | 0.96 | 0.97 |
| chr3 | 40650437  | 40651054  | Mfsd8           | ENSMUSG00000025759 | -129 | 0.04 | 0.35 | 0.12 | 0.14 | 0.06 | 0.18 |
| chr3 | 40697744  | 40698441  | 6430590A07Rik   | ENSMUSG00000087081 | -47  | 0.03 | 0.12 | 0.12 | 0.18 | 0.03 | 0.17 |
| chr3 | 53460538  | 53461250  | Frem2           | ENSMUSG00000037016 | 383  | 0.13 | 0.24 | 0.14 | 0.23 | 0.13 | 0.14 |
| chr3 | 55046377  | 55046857  | Dclk1           | ENSMUSG00000027797 | 169  | 0.15 | 0.15 | 0.09 | 0.17 | 0.15 | 0.15 |
| chr3 | 58380511  | 58381238  | 2810407C02Rik   | ENSMUSG00000075700 | 316  | 0.28 | 0.51 | 0.15 | 0.17 | 0.29 | 0.15 |
| chr3 | 67267585  | 67267939  | Lxn             | ENSMUSG00000047557 | -58  | 0.1  | 0.48 | 0.1  | 0.15 | 0.07 | 0.16 |

|      |           |           |                 |                     |      |      |      |      |      |      |      |
|------|-----------|-----------|-----------------|---------------------|------|------|------|------|------|------|------|
| chr3 | 68376258  | 68376511  | Schip1          | ENSMUSG00000027777  | 94   | 1    | 0.15 | 0.13 | 0.5  | 1    | 0.14 |
| chr3 | 68930254  | 68930640  | Kpna4           | ENSMUSG00000027782  | 105  | 0.12 | 0.17 | 0.1  | 0.11 | 0.12 | 0.13 |
| chr3 | 79395155  | 79395657  | Ppid            | ENSMUSG00000027804  | 142  | 0.11 | 0.14 | 0.11 | 0.13 | 0.11 | 0.07 |
| chr3 | 83645312  | 83645596  | Tlr2            | ENSMUSG00000027995  | 235  | 0.9  | 0.6  | 0.27 | 0.09 | 1    | 0.15 |
| chr3 | 87329387  | 87329840  | Etv3            | ENSMUSG00000003382  | 113  | 0.11 | NA   | 0.07 | 0.17 | 0.12 | 0.12 |
| chr3 | 87803675  | 87804391  | Bcan            | ENSMUSG00000004892  | 245  | 0.12 | 0.22 | 0.11 | 0.1  | 0.11 | 0.14 |
| chr3 | 88058371  | 88058662  | Rhbg            | ENSMUSG00000001417  | 115  | 0.07 | 0.13 | 0.14 | 0.14 | 0.07 | 0.12 |
| chr3 | 88213753  | 88214347  | Pmf1            | ENSMUSG00000028066  | 188  | 0.09 | 0.11 | 0.11 | 0.16 | 0.06 | 0.21 |
| chr3 | 88288538  | 88289045  | Lmna            | ENSMUSG00000028063  | -262 | 0.25 | 0.52 | 0.49 | 0.86 | 0.25 | 0.65 |
| chr3 | 88383524  | 88383734  | Ssr2            | ENSMUSG00000041355  | 36   | 1    | 0.8  | 0.11 | 0.23 | 0.5  | 0.17 |
| chr3 | 88905488  | 88906113  | Fdps            | ENSMUSG000000059743 | 81   | 0.67 | 1    | 0.1  | 0.27 | 0.5  | 0.32 |
| chr3 | 89017581  | 89018459  | Mtx1            | ENSMUSG00000064068  | -272 | 0.07 | 0.28 | 0.12 | 0.17 | 0.08 | 0.11 |
| chr3 | 90294728  | 90294976  | Snapin          | ENSMUSG00000001018  | 63   | 0.1  | 0.1  | 0.11 | 0.17 | 0.1  | 0.11 |
| chr3 | 93324688  | 93324904  | S100a11         | ENSMUSG00000027907  | 386  | 0.08 | 0.14 | 0.1  | 0.05 | 0.05 | 0.05 |
| chr3 | 95021409  | 95022026  | Gabpb2          | ENSMUSG000000038766 | -101 | 0.07 | 0.21 | 0.14 | 0.19 | 0.07 | 0.18 |
| chr3 | 95491721  | 95491955  | Adamtsl4        | ENSMUSG00000015850  | -57  | 0.11 | 0.16 | 0.08 | 0.09 | 0.11 | 0.1  |
| chr3 | 95659597  | 95659947  | Prpf3           | ENSMUSG00000015748  | -96  | 0.07 | 0.25 | 0.11 | 0.15 | 0.08 | 0.11 |
| chr3 | 95697872  | 95698239  | Aph1a           | ENSMUSG00000015750  | 163  | 0.1  | 0.08 | 0.1  | 0.13 | 0.1  | 0.11 |
| chr3 | 96023871  | 96024734  | Gm15444         | ENSMUSG000000086556 | -211 | 0.33 | NA   | NA   | NA   | 1    | NA   |
| chr3 | 96205792  | 96206106  | 4930477E14Rik   | ENSMUSG000000091033 | -12  | 0.33 | 0.09 | 0.12 | 0.26 | 0.14 | 0.26 |
| chr3 | 96218495  | 96218827  | Telomerase-vert | ENSMUSG000000064796 | 121  | 0.13 | 0.1  | 0.17 | 0.13 | 0.14 | 0.06 |
| chr3 | 96404969  | 96405222  | Lix1l           | ENSMUSG000000049288 | 39   | 0.14 | 0.08 | 0.09 | 0.07 | 0.15 | 0.08 |
| chr3 | 97705031  | 97705452  | Sec22b          | ENSMUSG00000027879  | 128  | 0.16 | 0.26 | 0.16 | 0.22 | 0.16 | 0.21 |
| chr3 | 98944878  | 98945592  | Wars2           | ENSMUSG00000004233  | 244  | 0.15 | 0.19 | 0.19 | 0.31 | 0.14 | 0.16 |
| chr3 | 99057553  | 99058072  | Tbx15           | ENSMUSG00000027868  | 129  | 0.05 | 0.24 | 0.12 | 0.12 | 0.05 | 0.14 |
| chr3 | 101180733 | 101181486 | Igsf3           | ENSMUSG000000042035 | 61   | 0.12 | 0.14 | 0.1  | 0.12 | 0.12 | 0.12 |
| chr3 | 102273846 | 102274302 | Ngf             | ENSMUSG00000027859  | 223  | 0.06 | 0.09 | 0.21 | 0.17 | 0.05 | 0.19 |
| chr3 | 102538628 | 102539441 | Tspan2          | ENSMUSG00000027858  | -104 | 0.14 | 0.17 | 0.1  | 0.19 | 0.15 | 0.15 |
| chr3 | 102824247 | 102825045 | Csde1           | ENSMUSG000000068823 | 177  | 0.25 | 0.19 | 0.12 | 0.17 | 0.3  | 0.16 |
| chr3 | 102862140 | 102862442 | Nras            | ENSMUSG00000027852  | 139  | 0.25 | 0.27 | 0.09 | 0.21 | 0.17 | 0.11 |

|      |           |           |               |                    |      |      |      |      |      |      |      |
|------|-----------|-----------|---------------|--------------------|------|------|------|------|------|------|------|
| chr3 | 103594740 | 103595489 | Hipk1         | ENSMUSG00000008730 | -116 | 0.09 | 0.28 | 0.08 | 0.15 | 0.09 | 0.12 |
| chr3 | 104764283 | 104765426 | Wnt2b         | ENSMUSG00000027840 | -227 | 0.08 | 0.09 | 0.08 | 0.13 | 0.08 | 0.13 |
| chr3 | 105508112 | 105508444 | 6530418L21Rik | ENSMUSG00000048458 | -98  | 0.08 | 0.08 | 0.1  | 0.12 | 0.06 | 0.05 |
| chr3 | 106285312 | 106285732 | Dennd2d       | ENSMUSG00000027901 | 199  | 0.2  | NA   | 0.14 | NA   | 0.11 | 0.11 |
| chr3 | 107698683 | 107699188 | 4933431E20Rik | ENSMUSG00000086968 | -251 | 0.23 | 0.21 | 0.13 | 0.16 | 0.25 | 0.18 |
| chr3 | 108365082 | 108365490 | Tmem167b      | ENSMUSG00000068732 | -198 | 0.17 | 0.39 | 0.1  | 0.31 | 0.22 | 0.22 |
| chr3 | 108714020 | 108714792 | Prpf38b       | ENSMUSG00000027881 | 208  | 0.08 | 0.16 | 0.09 | 0.18 | 0.09 | 0.16 |
| chr3 | 108829890 | 108830733 | Fam102b       | ENSMUSG00000040339 | -120 | 0.14 | 0.24 | 0.13 | 0.13 | 0.14 | 0.16 |
| chr3 | 108926029 | 108926341 | Slc25a24      | ENSMUSG00000040322 | 118  | 0.2  | 0.12 | 0.07 | 0.14 | 0.12 | 0.08 |
| chr3 | 109945194 | 109945428 | Ntng1         | ENSMUSG00000050836 | 1618 | 0.2  | 0.18 | 0.1  | 0.28 | 0.14 | 0.17 |
| chr3 | 115417569 | 115417840 | S1pr1         | ENSMUSG00000045092 | 269  | 0.07 | 0.11 | 0.17 | 0.15 | 0.07 | 0.28 |
| chr3 | 115590754 | 115591090 | A930005H10Rik | ENSMUSG00000054426 | 126  | 0.12 | 0.08 | 0.09 | 0.14 | 0.11 | 0.13 |
| chr3 | 115954441 | 115955627 | Gpr88         | ENSMUSG00000068696 | 1368 | 0.15 | 0.19 | 0.11 | 0.11 | 0.15 | 0.11 |
| chr3 | 116126119 | 116126875 | Cdc14a        | ENSMUSG00000033502 | 316  | 0.08 | 0.07 | 0.11 | 0.11 | 0.08 | 0.11 |
| chr3 | 123088635 | 123088962 | Mettl14       | ENSMUSG00000028114 | 51   | 0.21 | NA   | 0.14 | 0.31 | 0.19 | 0.21 |
| chr3 | 127539988 | 127540763 | Ap1ar         | ENSMUSG00000074238 | 35   | 0.08 | 0.11 | 0.09 | 0.13 | 0.08 | 0.12 |
| chr3 | 128916708 | 128917912 | Pitx2         | ENSMUSG00000028023 | 117  | 0.15 | NA   | 0.09 | 0.25 | 0.16 | 0.23 |
| chr3 | 128918596 | 128919108 | Pitx2         | ENSMUSG00000028023 | 414  | 0.06 | 0.07 | 0.08 | 0.15 | 0.07 | 0.16 |
| chr3 | 129604324 | 129604627 | Casp6         | ENSMUSG00000027997 | 132  | 0.11 | 0.1  | 0.09 | 0.16 | 0.04 | 0.21 |
| chr3 | 138868445 | 138868923 | B930007M17Rik | ENSMUSG00000047940 | 26   | 0.09 | 0.47 | 0.12 | 0.33 | 0.11 | 0.18 |
| chr3 | 140874284 | 140874853 | Pdha2         | ENSMUSG00000047674 | 751  | 0.99 | 0.98 | 0.94 | 0.86 | 0.98 | 0.99 |
| chr3 | 151828613 | 151828997 | Gipc2         | ENSMUSG00000039131 | -91  | 0.5  | 0.21 | 0.12 | 0.23 | 0.33 | 0.18 |
| chr3 | 153575631 | 153576092 | Rabggtb       | ENSMUSG00000038975 | 28   | 0.08 | 0.11 | 0.07 | 0.09 | 0.1  | 0.11 |
| chr3 | 153607216 | 153607550 | Acadm         | ENSMUSG00000062908 | 23   | 0.05 | 0.06 | 0.13 | 0.15 | 0.07 | 0.09 |
| chr3 | 17694652  | 17694938  | Mir124a-2     | ENSMUSG00000093073 | -867 | 0.21 | NA   | 0.16 | 0.27 | NA   | 0.2  |
| chr3 | 8963997   | 8964216   | Tpd52         | ENSMUSG00000027506 | -60  | NA   | NA   | 0.12 | 0.5  | 0.17 | 0.17 |
| chr3 | 14641648  | 14641854  | Car13         | ENSMUSG00000027555 | 24   | 0.5  | NA   | 0.09 | 0.12 | NA   | 0.17 |
| chr3 | 28161461  | 28161767  | Tnik          | ENSMUSG00000027692 | -522 | NA   | NA   | 0.07 | 0.09 | 0.14 | 0.12 |
| chr3 | 40430431  | 40430936  | Intu          | ENSMUSG00000060798 | 475  | NA   | NA   | 0.15 | 0.38 | NA   | 0.18 |
| chr3 | 40439615  | 40440015  | Intu          | ENSMUSG00000060798 | 126  | 1    | 0.43 | 0.09 | 0.28 | NA   | 0.27 |



|      |          |          |               |                    |       |      |      |      |      |      |      |
|------|----------|----------|---------------|--------------------|-------|------|------|------|------|------|------|
| chr3 | 45182088 | 45182321 | 2610316D01Rik | ENSMUSG00000086101 | -22   | NA   | NA   | 1    | NA   | 1    | NA   |
| chr3 | 51212653 | 51212955 | Ndufc1        | ENSMUSG00000037152 | 106   | 0.08 | 0.4  | 0.14 | 0.19 | NA   | 0.27 |
| chr3 | 54559368 | 54559809 | Smad9         | ENSMUSG00000027796 | 84    | NA   | 1    | 0.08 | 0.06 | 0.24 | 0.11 |
| chr3 | 55586722 | 55587301 | Mab21l1       | ENSMUSG00000056947 | 579   | NA   | 0.5  | 0.17 | 0.18 | 1    | 0.18 |
| chr3 | 58440507 | 58440730 | Fam194a       | ENSMUSG00000070471 | 511   | NA   | NA   | 0.33 | NA   | NA   | 0.29 |
| chr3 | 66782676 | 66782968 | Shox2         | ENSMUSG00000093425 | -89   | NA   | NA   | 0.5  | NA   | NA   | 0.41 |
| chr3 | 68930994 | 68931245 | Kpna4         | ENSMUSG00000027782 | -84   | NA   | 0.11 | 0.1  | 0.14 | 0.12 | 0.18 |
| chr3 | 78770801 | 78771060 | Gm9762        | ENSMUSG00000037096 | -209  | NA   | NA   | 0.16 | 0.3  | NA   | 0.14 |
| chr3 | 82707671 | 82708424 | Lrat          | ENSMUSG00000028003 | -152  | NA   | 0.06 | 0.13 | 0.09 | 0.09 | 0.12 |
| chr3 | 83568115 | 83568465 | Sfrp2         | ENSMUSG00000027996 | -1953 | NA   | NA   | NA   | 0.07 | NA   | 0.13 |
| chr3 | 83959349 | 83959767 | Mnd1          | ENSMUSG00000033752 | 150   | NA   | 0.2  | 0.24 | NA   | 0.33 | 0.09 |
| chr3 | 86978154 | 86978716 | Kirrel        | ENSMUSG00000041734 | 37    | 1    | 0.04 | 0.08 | 0.14 | NA   | 0.21 |
| chr3 | 87600791 | 87600996 | Insrr         | ENSMUSG00000005640 | 20    | NA   | 0.21 | 0.09 | NA   | NA   | 0.23 |
| chr3 | 87862204 | 87862562 | Apoa1bp       | ENSMUSG00000028070 | 34    | NA   | 1    | 0.12 | NA   | NA   | 0.21 |
| chr3 | 87885885 | 87886116 | Iqgap3        | ENSMUSG00000028068 | 27    | 0.74 | NA   | 0.25 | NA   | NA   | 0.31 |
| chr3 | 88100802 | 88101565 | 1700021C14Rik | ENSMUSG00000010538 | -365  | NA   | NA   | 0.09 | NA   | NA   | 0.09 |
| chr3 | 88169770 | 88169987 | Paqr6         | ENSMUSG00000041423 | -766  | NA   | NA   | 0.83 | NA   | NA   | NA   |
| chr3 | 88336644 | 88336856 | Mex3a         | ENSMUSG00000074480 | 433   | NA   | NA   | 1    | NA   | NA   | NA   |
| chr3 | 88356854 | 88357142 | Lamtor2       | ENSMUSG00000028062 | -52   | 0.06 | 0.06 | 0.06 | 0.08 | NA   | 0.15 |
| chr3 | 88579062 | 88579383 | Syt11         | ENSMUSG00000068923 | -148  | NA   | NA   | 0.04 | 0.2  | NA   | 0.08 |
| chr3 | 88639077 | 88639398 | Gon4l         | ENSMUSG00000054199 | 84    | NA   | NA   | 0.1  | 0.23 | 0.6  | 0.24 |
| chr3 | 89031288 | 89031711 | Mir92b        | ENSMUSG00000076255 | -379  | 0.3  | 0.25 | 0.5  | NA   | NA   | 0.38 |
| chr3 | 89050299 | 89050561 | Krtcap2       | ENSMUSG00000042747 | 70    | 0.17 | 1    | 0.07 | 0.08 | NA   | 0.16 |
| chr3 | 89120427 | 89120670 | Gm15998       | ENSMUSG00000086389 | 1187  | NA   | 0.25 | 0.09 | 0.12 | 0.17 | 0.14 |
| chr3 | 89126783 | 89127005 | Efna3         | ENSMUSG00000028039 | -7    | NA   | 0.07 | 0.09 | 0.09 | 0.11 | 0.09 |
| chr3 | 89196964 | 89197167 | Zbtb7b        | ENSMUSG00000028042 | 60    | NA   | NA   | NA   | 1    | NA   | 0.11 |
| chr3 | 89200056 | 89200373 | Gm15417       | ENSMUSG00000074466 | 296   | NA   | NA   | 0.33 | NA   | 0.5  | 0.36 |
| chr3 | 89221948 | 89222272 | Cks1b         | ENSMUSG00000028044 | 31    | NA   | 0.17 | 0.1  | 0.07 | 0.14 | 0.11 |
| chr3 | 89764251 | 89764727 | Atp8b2        | ENSMUSG00000060671 | 62    | 0.5  | NA   | 0.08 | 0.37 | NA   | 0.32 |
| chr3 | 90017302 | 90017736 | Rps27         | ENSMUSG00000090733 | 54    | NA   | 0.12 | 0.2  | 0.14 | 0.09 | 0.13 |

|      |           |           |               |                     |      |      |      |      |      |      |      |
|------|-----------|-----------|---------------|---------------------|------|------|------|------|------|------|------|
| chr3 | 90051916  | 90052345  | Slc39a1       | ENSMUSG00000052310  | 36   | NA   | NA   | 0.22 | NA   | NA   | 0.23 |
| chr3 | 90280011  | 90280459  | Ilf2          | ENSMUSG00000001016  | 112  | NA   | 0.12 | 0.12 | 0.14 | 0.08 | 0.12 |
| chr3 | 94462262  | 94462933  | Tuft1         | ENSMUSG00000005968  | 125  | 1    | NA   | 1    | 1    | NA   | 0.5  |
| chr3 | 94561572  | 94562243  | Gm15264       | ENSMUSG000000081355 | 131  | NA   | NA   | 0.27 | NA   | NA   | 0.14 |
| chr3 | 94590227  | 94590910  | Cgn           | ENSMUSG000000068876 | -195 | NA   | 0.12 | 0.11 | 0.15 | 1    | 0.08 |
| chr3 | 94757992  | 94758420  | Rfx5          | ENSMUSG00000005774  | 209  | 1    | 1    | 0.13 | 0.22 | NA   | 0.11 |
| chr3 | 95085216  | 95085745  | Fam63a        | ENSMUSG000000038712 | 213  | NA   | 0.18 | 0.14 | 0.17 | 0.12 | 0.13 |
| chr3 | 95087221  | 95087498  | Fam63a        | ENSMUSG000000038712 | -165 | NA   | 0.33 | 0.18 | 0.17 | 0.17 | 0.27 |
| chr3 | 95231556  | 95231865  | Gm4349        | ENSMUSG000000091761 | 117  | NA   | 1    | 0.21 | 1    | 0.5  | 0.56 |
| chr3 | 95238265  | 95238627  | Arnt          | ENSMUSG00000015522  | 136  | NA   | NA   | 0.27 | 0.13 | 0.25 | 0.1  |
| chr3 | 96025239  | 96025493  | Hist2h2be     | ENSMUSG000000068854 | 322  | 0.58 | NA   | 0.16 | NA   | NA   | 0.11 |
| chr3 | 96066906  | 96067183  | Hist2h4       | ENSMUSG000000091405 | 190  | NA   | NA   | NA   | 1    | 1    | NA   |
| chr3 | 96255100  | 96256411  | BC107364      | ENSMUSG000000046317 | 474  | 1    | 1    | 1    | NA   | NA   | NA   |
| chr3 | 96262070  | 96263381  | U1            | ENSMUSG000000065773 | 1387 | NA   | NA   | 0.33 | 1    | NA   | NA   |
| chr3 | 96397919  | 96398206  | Polr3gl       | ENSMUSG000000028104 | 20   | NA   | 0.5  | 0.11 | 0.14 | 0.2  | 0.2  |
| chr3 | 97031530  | 97031733  | Bcl9          | ENSMUSG000000038256 | -173 | NA   | 0.8  | 0.31 | 0.61 | 0.27 | 0.29 |
| chr3 | 97692364  | 97692777  | Pde4dip       | ENSMUSG000000038170 | 60   | NA   | 0.25 | 0.18 | NA   | NA   | 0.5  |
| chr3 | 105507424 | 105507685 | 6530418L21Rik | ENSMUSG000000048458 | 37   | NA   | NA   | 0.09 | 0.24 | NA   | 0.18 |
| chr3 | 106524523 | 106525416 | 4933421E11Rik | ENSMUSG000000056260 | 369  | NA   | 0.63 | 0.18 | 0.06 | NA   | 0.11 |
| chr3 | 107562982 | 107563204 | Csf1          | ENSMUSG000000014599 | 46   | NA   | NA   | 0.16 | NA   | 0.12 | 0.09 |
| chr3 | 120994546 | 120995041 | Alg14         | ENSMUSG000000039887 | 58   | NA   | NA   | 0.12 | NA   | 0.5  | 0.35 |
| chr3 | 123211033 | 123211829 | Snora24       | ENSMUSG000000092730 | -447 | NA   | NA   | 0.15 | NA   | 0.37 | 0.19 |
| chr3 | 129672616 | 129673113 | Ccdc109b      | ENSMUSG000000027994 | 43   | NA   | 0.6  | 0.08 | 0.08 | NA   | 0.15 |
| chr3 | 129883624 | 129884515 | Col25a1       | ENSMUSG000000058897 | 260  | NA   | 0.23 | 0.13 | 0.2  | 0.21 | 0.29 |
| chr3 | 131748588 | 131749053 | Dkk2          | ENSMUSG000000028031 | 564  | 0.12 | NA   | 0.06 | NA   | NA   | 0.17 |
| chr3 | 134875438 | 134875832 | Cenpe         | ENSMUSG000000045328 | 108  | 0.5  | NA   | 0.21 | NA   | NA   | 0.29 |
| chr3 | 137581372 | 137581648 | Lamtor3       | ENSMUSG000000091512 | 20   | NA   | NA   | 0.19 | 1    | 0.75 | 0.32 |
| chr3 | 152003115 | 152003451 | Fam73a        | ENSMUSG000000054942 | 88   | NA   | 0.17 | 0.06 | 0.2  | NA   | 0.09 |
| chr3 | 153387695 | 153388210 | St6galnac3    | ENSMUSG000000052544 | 74   | NA   | 0.08 | 0.06 | 0.05 | 1    | 0.09 |
| chr4 | 40704516  | 40705041  | Smu1          | ENSMUSG000000028409 | 86   | 1    | 0.36 | 0.16 | 0.28 | 0.31 | 0.24 |

|      |           |           |               |                    |      |      |      |      |      |      |      |
|------|-----------|-----------|---------------|--------------------|------|------|------|------|------|------|------|
| chr4 | 102791802 | 102792518 | Mier1         | ENSMUSG00000028522 | 269  | 0.8  | 0.63 | 0.1  | 0.09 | 0.17 | 0.21 |
| chr4 | 151362704 | 151363157 | Thap3         | ENSMUSG00000039759 | 149  | 0.39 | 0.06 | 0.07 | 0.11 | 0.09 | 0.2  |
| chr4 | 155205400 | 155206245 | Aurkaip1      | ENSMUSG00000065990 | 362  | 0.76 | 0.12 | 0.14 | 0.22 | 0.17 | 0.15 |
| chr4 | 148960321 | 148961655 | Clstn1        | ENSMUSG00000039953 | 411  | 0.21 | 0.07 | 0.1  | 0.1  | 0.07 | 0.18 |
| chr4 | 127664998 | 127665567 | Csmd2         | ENSMUSG00000028804 | 181  | 0.43 | 0.23 | 0.18 | 0.16 | 0.12 | 0.18 |
| chr4 | 129497011 | 129498164 | Ptp4a2        | ENSMUSG00000028788 | 122  | 0.28 | 0.16 | 0.11 | 0.16 | 0.1  | 0.16 |
| chr4 | 56814794  | 56815674  | lkbkap        | ENSMUSG00000028431 | -31  | 0.42 | 0.17 | 0.12 | 0.17 | 0.13 | 0.12 |
| chr4 | 150502801 | 150503672 | Camta1        | ENSMUSG00000014592 | 368  | 0.11 | 0.17 | 0.19 | 0.17 | 0.63 | 0.16 |
| chr4 | 126106468 | 126107066 | Eif2c3        | ENSMUSG00000028842 | -60  | 0.43 | 0.2  | 0.11 | 0.1  | 0.12 | 0.11 |
| chr4 | 124804710 | 124805389 | Zc3h12a       | ENSMUSG00000042677 | 35   | 0.34 | 0.24 | 0.1  | 0.18 | 0.13 | 0.11 |
| chr4 | 139387420 | 139389460 | Pax7          | ENSMUSG00000028736 | 482  | 0.24 | 0.13 | 0.15 | 0.24 | 0.07 | 0.22 |
| chr4 | 114579723 | 114582165 | Foxd2         | ENSMUSG00000055210 | 559  | 0.26 | 0.14 | 0.18 | 0.2  | 0.12 | 0.17 |
| chr4 | 120497704 | 120498494 | Nfyc          | ENSMUSG00000032897 | 100  | 0.8  | 0.8  | 0.21 | 0.36 | 0.58 | 0.24 |
| chr4 | 151504790 | 151506412 | Espn          | ENSMUSG00000028943 | -262 | 0.32 | 0.19 | 0.13 | 0.21 | 0.11 | 0.14 |
| chr4 | 15940654  | 15941421  | Osgin2        | ENSMUSG00000041153 | -94  | 0.18 | 0.12 | 0.1  | 0.11 | 0.06 | 0.1  |
| chr4 | 57155698  | 57156712  | Epb4.1l4b     | ENSMUSG00000028434 | 104  | 0.13 | 0.11 | 0.09 | 0.13 | 0.07 | 0.14 |
| chr4 | 154460124 | 154460883 | Rer1          | ENSMUSG00000029048 | -23  | 0.5  | 0.32 | 0.13 | 0.13 | 0.17 | 0.09 |
| chr4 | 24825075  | 24825593  | Ndufaf4       | ENSMUSG00000028261 | 104  | 0.32 | 0.14 | 0.17 | 0.13 | 0.09 | 0.15 |
| chr4 | 128331771 | 128332443 | Phc2          | ENSMUSG00000028796 | 125  | 0.49 | 0.25 | 0.08 | 0.19 | 0.14 | 0.14 |
| chr4 | 40669266  | 40670283  | Gm6297        | ENSMUSG00000091395 | -343 | 0.23 | 0.22 | 0.15 | 0.19 | 0.09 | 0.12 |
| chr4 | 142939898 | 142940636 | Lrrc38        | ENSMUSG00000028584 | 607  | 0.03 | 0.07 | 0.1  | 0.1  | 0.09 | 0.12 |
| chr4 | 34677333  | 34677564  | 1700003M02Rik | ENSMUSG00000028294 | -21  | 1    | NA   | 0.1  | 0.18 | 0.06 | 0.07 |
| chr4 | 137149581 | 137150704 | Usp48         | ENSMUSG00000043411 | 472  | 0.88 | 0.16 | 0.14 | 0.17 | 0.16 | 0.12 |
| chr4 | 86394226  | 86395150  | Dennd4c       | ENSMUSG00000038024 | 229  | 0.54 | 0.31 | 0.11 | 0.25 | 0.2  | 0.16 |
| chr4 | 44769370  | 44769871  | Zcchc7        | ENSMUSG00000035649 | 180  | 0.86 | 0.12 | 0.14 | 0.11 | 0.14 | 0.1  |
| chr4 | 135050526 | 135051114 | Nipal3        | ENSMUSG00000028803 | -282 | 0.48 | 0.06 | 0.14 | 0.21 | 0.1  | 0.15 |
| chr4 | 138528936 | 138529359 | Tmco4         | ENSMUSG00000041143 | 323  | 1    | 0.24 | 0.13 | 0.18 | 0.29 | 0.17 |
| chr4 | 155221497 | 155222153 | Dvl1          | ENSMUSG00000029071 | 314  | 0.15 | 0.15 | 0.1  | 0.12 | 0.05 | 0.12 |
| chr4 | 151235139 | 151236982 | Camta1        | ENSMUSG00000014592 | -301 | 0.23 | 0.13 | 0.1  | 0.15 | 0.13 | 0.14 |
| chr4 | 43505661  | 43506602  | Ccdc107       | ENSMUSG00000028461 | 359  | 0.06 | 0.24 | 0.14 | 0.12 | 0.3  | 0.16 |

|      |           |           |               |                    |      |      |      |      |      |      |      |
|------|-----------|-----------|---------------|--------------------|------|------|------|------|------|------|------|
| chr4 | 125781161 | 125781669 | Stk40         | ENSMUSG00000042608 | 214  | 0.32 | 0.13 | 0.14 | 0.12 | 0.09 | 0.13 |
| chr4 | 140542672 | 140543160 | Atp13a2       | ENSMUSG00000036622 | 128  | 0.31 | 0.18 | 0.09 | 0.13 | 0.12 | 0.16 |
| chr4 | 132594413 | 132595555 | Ahdc1         | ENSMUSG00000037692 | -424 | 0.17 | 0.13 | 0.1  | 0.13 | 0.08 | 0.12 |
| chr4 | 101168980 | 101169578 | Dnajc6        | ENSMUSG00000028528 | 26   | 0.18 | 0.08 | 0.1  | 0.12 | 0.06 | 0.14 |
| chr4 | 120077597 | 120078581 | Scmh1         | ENSMUSG00000000085 | 203  | 0.48 | 0.26 | 0.1  | 0.11 | 0.2  | 0.11 |
| chr4 | 107889941 | 107890809 | Zyg11a        | ENSMUSG00000034645 | 127  | 0.42 | 0.22 | 0.11 | 0.17 | 0.16 | 0.2  |
| chr4 | 32743929  | 32744507  | Mdn1          | ENSMUSG00000058006 | 124  | 0.29 | 0.19 | 0.09 | 0.13 | 0.09 | 0.1  |
| chr4 | 100449037 | 100450613 | Cachd1        | ENSMUSG00000028532 | 545  | 0.66 | 0.25 | 0.11 | 0.23 | 0.34 | 0.21 |
| chr4 | 131767129 | 131768289 | Ythdf2        | ENSMUSG00000040025 | 297  | 0.26 | 0.12 | 0.14 | 0.18 | 0.09 | 0.13 |
| chr4 | 106850827 | 106851954 | 2210012G02Rik | ENSMUSG00000028619 | -503 | 0.26 | 0.21 | 0.14 | 0.14 | 0.08 | 0.12 |
| chr4 | 41586958  | 41587273  | Enho          | ENSMUSG00000028445 | 221  | 0.43 | 0.11 | 0.12 | 0.16 | 0.13 | 0.14 |
| chr4 | 128404575 | 128405514 | Phc2          | ENSMUSG00000028796 | 219  | 0.25 | 0.18 | 0.13 | 0.17 | 0.12 | 0.21 |
| chr4 | 9771091   | 9771919   | Gdf6          | ENSMUSG00000051279 | -14  | 0.42 | 0.3  | 0.11 | 0.15 | 0.13 | 0.15 |
| chr4 | 6917296   | 6918331   | Tox           | ENSMUSG00000041272 | -183 | 0.29 | 0.31 | 0.15 | 0.2  | 0.08 | 0.14 |
| chr4 | 94223016  | 94223551  | Gm10306       | ENSMUSG00000070900 | 46   | 0.17 | 0.12 | 0.11 | 0.22 | 0.05 | 0.17 |
| chr4 | 153331011 | 153331694 | A430005L14Rik | ENSMUSG00000047613 | 6    | 0.21 | 0.16 | 0.1  | 0.14 | 0.08 | 0.16 |
| chr4 | 45197423  | 45198257  | Frmpd1        | ENSMUSG00000035615 | 93   | 0.26 | 0.11 | 0.11 | 0.17 | 0.09 | 0.11 |
| chr4 | 57968498  | 57969508  | Txn1          | ENSMUSG00000028367 | 280  | 1    | 0.23 | 0.11 | 0.18 | 0.13 | 0.14 |
| chr4 | 76095247  | 76096440  | Ptprd         | ENSMUSG00000028399 | 41   | 0.45 | 0.2  | 0.14 | 0.11 | 0.1  | 0.13 |
| chr4 | 53726963  | 53727502  | Fktn          | ENSMUSG00000028414 | 206  | 0.22 | 0.16 | 0.25 | 0.17 | 0.08 | 0.14 |
| chr4 | 147818417 | 147818939 | Ubiad1        | ENSMUSG00000047719 | 192  | 1    | 0.62 | 0.23 | 0.43 | 0.12 | 0.11 |
| chr4 | 141639748 | 141640607 | Gm10565       | ENSMUSG00000073728 | 290  | 0.26 | 0.11 | 0.09 | 0.21 | 0.08 | 0.18 |
| chr4 | 40894985  | 40895764  | Bag1          | ENSMUSG00000028416 | -98  | 0.24 | 0.11 | 0.1  | 0.12 | 0.09 | 0.16 |
| chr4 | 119094580 | 119095577 | Ppcs          | ENSMUSG00000028636 | -115 | 0.53 | 0.18 | 0.11 | 0.13 | 0.16 | 0.15 |
| chr4 | 116793204 | 116793952 | Btbd19        | ENSMUSG00000073771 | 292  | 0.27 | 0.12 | 0.12 | 0.17 | 0.07 | 0.21 |
| chr4 | 104782031 | 104782431 | Prkaa2        | ENSMUSG00000028518 | 264  | 0.41 | 0.22 | 0.21 | 0.5  | 0.06 | 0.12 |
| chr4 | 41295978  | 41296524  | Ubap1         | ENSMUSG00000028437 | 222  | 0.33 | 0.14 | 0.08 | 0.23 | 0.07 | 0.13 |
| chr4 | 73897625  | 73898342  | Kdm4c         | ENSMUSG00000028397 | 143  | 0.46 | 0.21 | 0.1  | 0.14 | 0.17 | 0.18 |
| chr4 | 11003027  | 11003419  | 2310030N02Rik | ENSMUSG00000050323 | 73   | 0.14 | 0.4  | 0.11 | 0.13 | 0.41 | 0.14 |
| chr4 | 41261366  | 41262023  | Dcaf12        | ENSMUSG00000028436 | 228  | 0.46 | 0.19 | 0.1  | 0.18 | 0.17 | 0.21 |

|      |           |           |               |                    |      |      |      |      |      |      |      |
|------|-----------|-----------|---------------|--------------------|------|------|------|------|------|------|------|
| chr4 | 117559462 | 117560067 | Atp6v0b       | ENSMUSG00000033379 | 128  | 0.24 | 0.15 | 0.12 | 0.11 | 0.07 | 0.17 |
| chr4 | 86519937  | 86520624  | Acer2         | ENSMUSG00000038007 | -20  | 0.48 | 0.18 | 0.16 | 0.18 | 0.23 | 0.19 |
| chr4 | 116136266 | 116136995 | Mast2         | ENSMUSG00000003810 | -274 | 0.24 | 0.25 | 0.09 | 0.12 | 0.1  | 0.12 |
| chr4 | 116512657 | 116512958 | Rpl36-ps8     | ENSMUSG00000075390 | 19   | 0.22 | 0.62 | 0.21 | 0.12 | 0.55 | 0.29 |
| chr4 | 119959424 | 119960726 | Foxo6         | ENSMUSG00000052135 | -121 | 0.2  | 0.14 | 0.08 | 0.14 | 0.11 | 0.15 |
| chr4 | 43644228  | 43644671  | AL732626.1    | ENSMUSG00000092675 | 152  | 0.27 | 0.05 | 0.07 | 0.12 | 0.08 | 0.16 |
| chr4 | 53172657  | 53173060  | Abca1         | ENSMUSG00000015243 | -91  | 0.33 | 0.06 | 0.12 | 0.13 | 0.11 | 0.15 |
| chr4 | 94716676  | 94719915  | BC042782      | ENSMUSG00000087366 | 70   | 0.18 | 0.14 | 0.11 | 0.15 | 0.09 | 0.11 |
| chr4 | 155570788 | 155572164 | Agm           | ENSMUSG00000041936 | 60   | 0.12 | 0.16 | 0.09 | 0.15 | 0.07 | 0.15 |
| chr4 | 70071135  | 70071707  | Cdk5rap2      | ENSMUSG00000039298 | -20  | 0.42 | 0.13 | 0.07 | 0.21 | 1    | 0.13 |
| chr4 | 98049619  | 98049960  | Tm2d1         | ENSMUSG00000028563 | -38  | 0.28 | 0.22 | 0.12 | 0.17 | 0.09 | 0.15 |
| chr4 | 88367804  | 88368577  | Klhl9         | ENSMUSG00000070923 | 175  | 0.47 | 0.16 | 0.09 | 0.14 | 0.12 | 0.13 |
| chr4 | 138648398 | 138649157 | Nbl1          | ENSMUSG00000041120 | 106  | 0.23 | 0.17 | 0.1  | 0.14 | 0.1  | 0.15 |
| chr4 | 141219504 | 141220289 | Plekhm2       | ENSMUSG00000028917 | 137  | 0.18 | 0.13 | 0.16 | 0.15 | 0.1  | 0.16 |
| chr4 | 132686279 | 132686781 | Wasf2         | ENSMUSG00000028868 | 110  | 0.19 | 0.08 | 0.1  | 0.13 | 0.07 | 0.14 |
| chr4 | 41515969  | 41516885  | 2310028H24Rik | ENSMUSG00000028439 | 115  | 0.26 | 0.11 | 0.09 | 0.21 | 0.08 | 0.16 |
| chr4 | 147932502 | 147933002 | Exosc10       | ENSMUSG00000017264 | 214  | 0.64 | 0.31 | 0.12 | 0.18 | 0.29 | 0.17 |
| chr4 | 53452875  | 53453891  | Slc44a1       | ENSMUSG00000028412 | 98   | 0.23 | 0.09 | 0.08 | 0.14 | 0.13 | 0.11 |
| chr4 | 149610752 | 149611581 | Eno1          | ENSMUSG00000063524 | 336  | 0.39 | 0.12 | 0.1  | 0.17 | 0.16 | 0.17 |
| chr4 | 34010624  | 34011864  | Cnr1          | ENSMUSG00000044288 | -324 | 0.19 | 0.13 | 0.17 | 0.15 | 0.09 | 0.14 |
| chr4 | 46401960  | 46402466  | 5830415F09Rik | ENSMUSG00000028331 | 77   | 0.33 | 0.08 | 0.11 | 0.15 | 0.05 | 0.15 |
| chr4 | 136912850 | 136913751 | Cdc42         | ENSMUSG00000006699 | 292  | 0.12 | 0.21 | 0.08 | 0.14 | 0.21 | 0.14 |
| chr4 | 149147589 | 149148513 | Slc25a33      | ENSMUSG00000028982 | 335  | 0.2  | 0.1  | 0.11 | 0.15 | 0.1  | 0.12 |
| chr4 | 118954793 | 118954994 | Ybx1          | ENSMUSG00000028639 | -102 | 0.7  | 0.66 | 0.9  | 0.81 | 0.96 | 0.92 |
| chr4 | 154771759 | 154772354 | Gabrd         | ENSMUSG00000029054 | 89   | 1    | 0.88 | 0.32 | 0.56 | 0.12 | 0.21 |
| chr4 | 61869353  | 61869826  | Zfp37         | ENSMUSG00000028389 | -109 | 0.41 | 0.14 | 0.1  | 0.13 | 0.12 | 0.2  |
| chr4 | 115747971 | 115749217 | Lrrc41        | ENSMUSG00000028703 | 526  | 0.25 | 0.21 | 0.13 | 0.15 | 0.15 | 0.17 |
| chr4 | 133308284 | 133310593 | Arid1a        | ENSMUSG00000007880 | 88   | 0.15 | 0.12 | 0.09 | 0.14 | 0.08 | 0.14 |
| chr4 | 141794742 | 141795437 | Kazn          | ENSMUSG00000040606 | 227  | 0.12 | 0.12 | 0.1  | 0.11 | 0.07 | 0.11 |
| chr4 | 93001414  | 93002462  | Tusc1         | ENSMUSG00000054000 | 264  | 0.18 | 0.15 | 0.08 | 0.12 | 0.09 | 0.1  |

|      |           |           |               |                     |      |      |      |      |      |      |      |
|------|-----------|-----------|---------------|---------------------|------|------|------|------|------|------|------|
| chr4 | 136018273 | 136018678 | 6030445D17Rik | ENSMUSG00000066178  | 310  | 0.38 | 0.25 | 0.11 | 0.13 | 0.08 | 0.15 |
| chr4 | 150481732 | 150483011 | Camta1        | ENSMUSG00000014592  | 41   | 0.14 | 0.1  | 0.09 | 0.11 | 0.08 | 0.08 |
| chr4 | 49644721  | 49645335  | Rnf20         | ENSMUSG00000028309  | 150  | 1    | 0.05 | 0.04 | 0.13 | 0.17 | 0.12 |
| chr4 | 119211834 | 119212888 | AA415398      | ENSMUSG000000087385 | -227 | 0.14 | 0.09 | 0.09 | 0.09 | 0.07 | 0.12 |
| chr4 | 140257171 | 140258997 | Rcc2          | ENSMUSG000000040945 | 696  | 0.07 | 0.13 | 0.09 | 0.12 | 0.14 | 0.13 |
| chr4 | 40226145  | 40226508  | Ndufb6        | ENSMUSG000000071014 | 116  | 1    | 0.04 | 0.11 | 0.14 | 0.09 | 0.13 |
| chr4 | 137024253 | 137025145 | Hspg2         | ENSMUSG000000028763 | 65   | 0.22 | 0.21 | 0.15 | 0.13 | 0.1  | 0.22 |
| chr4 | 84320315  | 84321970  | Bnc2          | ENSMUSG000000028487 | -242 | 0.18 | 0.09 | 0.09 | 0.14 | 0.11 | 0.15 |
| chr4 | 44715996  | 44717589  | Pax5          | ENSMUSG000000014030 | -507 | 0.19 | 0.1  | 0.1  | 0.15 | 0.1  | 0.12 |
| chr4 | 59450818  | 59451397  | Susd1         | ENSMUSG000000038578 | 398  | 0.29 | 0.13 | 0.16 | 0.2  | 0.12 | 0.2  |
| chr4 | 88783263  | 88783794  | Mtap          | ENSMUSG000000062937 | 502  | 1    | 1    | 0.1  | 0.23 | 0.38 | 0.28 |
| chr4 | 115893448 | 115894443 | Pik3r3        | ENSMUSG000000028698 | -278 | 0.33 | 0.32 | 0.13 | 0.19 | 0.11 | 0.14 |
| chr4 | 48485789  | 48486417  | Tex10         | ENSMUSG000000028345 | 112  | 0.18 | 0.07 | 0.09 | 0.1  | 0.07 | 0.12 |
| chr4 | 80557089  | 80557841  | D4Bwg0951e    | ENSMUSG000000048706 | 915  | 0.05 | 0.57 | 0.11 | 0.14 | 0.15 | 0.23 |
| chr4 | 118214506 | 118214753 | Tmem125       | ENSMUSG000000050854 | 938  | 0.78 | 0.81 | 0.81 | 0.63 | 0.97 | 0.85 |
| chr4 | 140695135 | 140695810 | D4ErtD22e     | ENSMUSG000000040842 | 170  | 0.71 | 0.17 | 0.12 | 0.16 | 0.21 | 0.15 |
| chr4 | 132925583 | 132925926 | Slc9a1        | ENSMUSG000000028854 | 133  | 0.43 | 0.4  | 0.22 | 0.15 | 0.11 | 0.22 |
| chr4 | 59818583  | 59819420  | Snx30         | ENSMUSG000000028385 | 289  | 0.09 | 0.09 | 0.11 | 0.15 | 0.64 | 0.23 |
| chr4 | 133188849 | 133189108 | Zdhhc18       | ENSMUSG000000037553 | 406  | 0.19 | 0.26 | 0.15 | 0.24 | 0.05 | 0.22 |
| chr4 | 99320054  | 99320646  | Gm12688       | ENSMUSG000000086096 | 1324 | 0.42 | 0.14 | 0.13 | 0.16 | 0.14 | 0.22 |
| chr4 | 134323410 | 134324038 | Ldlrap1       | ENSMUSG000000037295 | 215  | 0.16 | 0.11 | 0.08 | 0.13 | 0.1  | 0.13 |
| chr4 | 43394661  | 43395213  | Rusc2         | ENSMUSG000000035969 | 86   | 0.26 | 0.14 | 0.07 | 0.19 | 0.09 | 0.1  |
| chr4 | 125167194 | 125169156 | Grik3         | ENSMUSG00000001985  | 231  | 0.24 | 0.16 | 0.1  | 0.12 | 0.15 | 0.11 |
| chr4 | 40090279  | 40090871  | Aco1          | ENSMUSG000000028405 | 277  | 0.25 | 0.11 | 0.1  | 0.14 | 0.11 | 0.08 |
| chr4 | 110023915 | 110024581 | Elavl4        | ENSMUSG000000028546 | 266  | 0.12 | 0.26 | 0.13 | 0.21 | 0.27 | 0.12 |
| chr4 | 15192658  | 15193853  | Tmem64        | ENSMUSG000000043252 | 277  | 0.41 | 0.27 | 0.11 | 0.18 | 0.26 | 0.11 |
| chr4 | 155608737 | 155609100 | Kihl17        | ENSMUSG000000078484 | 48   | 0.11 | 0.93 | 0.11 | 0.2  | 0.44 | 0.14 |
| chr4 | 86221504  | 86221974  | Rraga         | ENSMUSG000000070934 | 162  | 0.21 | 0.12 | 0.11 | 0.14 | 0.08 | 0.15 |
| chr4 | 123582013 | 123582774 | Mycbp         | ENSMUSG000000028647 | 318  | 0.28 | 0.28 | 0.1  | 0.14 | 0.15 | 0.19 |
| chr4 | 149943358 | 149944133 | Rere          | ENSMUSG000000039852 | 48   | 0.27 | 0.12 | 0.11 | 0.12 | 0.13 | 0.11 |

|      |           |           |               |                    |       |      |      |      |      |      |      |
|------|-----------|-----------|---------------|--------------------|-------|------|------|------|------|------|------|
| chr4 | 126846028 | 126846906 | Dlgap3        | ENSMUSG00000042388 | 19    | 0.21 | 0.13 | 0.11 | 0.14 | 0.12 | 0.16 |
| chr4 | 151460582 | 151461261 | Plekhg5       | ENSMUSG00000039713 | -46   | 0.22 | 0.19 | 0.11 | 0.17 | 0.08 | 0.13 |
| chr4 | 11314173  | 11315742  | Esrp1         | ENSMUSG00000040728 | -1027 | 0.18 | 0.09 | 0.11 | 0.16 | 0.1  | 0.17 |
| chr4 | 122910851 | 122911323 | Heyl          | ENSMUSG00000032744 | -9    | 0.16 | 0.13 | 0.1  | 0.2  | 0.07 | 0.12 |
| chr4 | 44676943  | 44677545  | Gm12462       | ENSMUSG00000086211 | -43   | 0.15 | 0.09 | 0.09 | 0.11 | 0.06 | 0.1  |
| chr4 | 137469362 | 137469851 | Ece1          | ENSMUSG00000057530 | 220   | 0.7  | 0.1  | 0.19 | 0.38 | 0.25 | 0.24 |
| chr4 | 9595758   | 9596563   | Asph          | ENSMUSG00000028207 | 73    | 0.12 | 0.14 | 0.14 | 0.12 | 0.26 | 0.18 |
| chr4 | 125839915 | 125840581 | 1700029G01Rik | ENSMUSG00000073758 | -339  | 0.4  | 0.23 | 0.08 | 0.12 | 0.09 | 0.08 |
| chr4 | 44246224  | 44247156  | Rnf38         | ENSMUSG00000035696 | -29   | 0.2  | 0.1  | 0.07 | 0.11 | 0.12 | 0.11 |
| chr4 | 48292128  | 48292930  | Erp44         | ENSMUSG00000028343 | -205  | 0.45 | 0.19 | 0.13 | 0.18 | 0.26 | 0.14 |
| chr4 | 122672883 | 122674255 | Mycl1         | ENSMUSG00000028654 | 674   | 0.24 | 0.12 | 0.14 | 0.15 | 0.14 | 0.16 |
| chr4 | 62180628  | 62181210  | Alad          | ENSMUSG00000028393 | -4    | 0.08 | 0.08 | 0.08 | 0.1  | 0.03 | 0.09 |
| chr4 | 68614811  | 68615170  | Dbc1          | ENSMUSG00000028351 | 441   | 0.2  | 0.05 | 0.06 | 0.13 | 0.07 | 0.08 |
| chr4 | 84191232  | 84191628  | Bnc2          | ENSMUSG00000028487 | 764   | 0.6  | 0.11 | 0.1  | 0.12 | 0.11 | 0.07 |
| chr4 | 130348266 | 130348866 | Sdc3          | ENSMUSG00000025743 | 114   | 0.17 | 0.09 | 0.11 | 0.11 | 0.09 | 0.15 |
| chr4 | 138866221 | 138867060 | Pqlc2         | ENSMUSG00000028744 | -88   | 0.15 | 0.1  | 0.1  | 0.14 | 0.07 | 0.15 |
| chr4 | 145166993 | 145167230 | Gm13226       | ENSMUSG00000083454 | 84    | 0.81 | 0.97 | 0.83 | 0.99 | 0.93 | 0.92 |
| chr4 | 148473625 | 148474038 | Pex14         | ENSMUSG00000028975 | 87    | 1    | 0.14 | 0.23 | 0.23 | 0.12 | 0.12 |
| chr4 | 84851164  | 84852034  | Sh3gl2        | ENSMUSG00000028488 | 254   | 0.5  | 0.23 | 0.08 | 0.09 | 0.11 | 0.14 |
| chr4 | 118081724 | 118082256 | Szt2          | ENSMUSG00000033253 | -122  | 0.32 | 0.11 | 0.15 | 0.3  | 0.17 | 0.24 |
| chr4 | 140857193 | 140857774 | Epha2         | ENSMUSG00000006445 | 328   | 0.17 | 0.09 | 0.07 | 0.29 | 0.04 | 0.21 |
| chr4 | 16090279  | 16090746  | Ripk2         | ENSMUSG00000041135 | 154   | 0.15 | 0.14 | 0.08 | 0.11 | 0.06 | 0.11 |
| chr4 | 82969502  | 82970240  | Ttc39b        | ENSMUSG00000038172 | 222   | 0.18 | 0.28 | 0.11 | 0.17 | 0.09 | 0.13 |
| chr4 | 133053589 | 133054511 | Trmp1         | ENSMUSG00000056596 | -416  | 0.38 | 0.09 | 0.11 | 0.15 | 0.19 | 0.13 |
| chr4 | 22416610  | 22417695  | Pou3f2        | ENSMUSG00000052621 | -1672 | 0.21 | 0.28 | 0.13 | 0.19 | 0.11 | 0.14 |
| chr4 | 109148639 | 109149326 | Rnf11         | ENSMUSG00000028557 | 298   | 0.15 | 0.2  | 0.08 | 0.16 | 0.06 | 0.14 |
| chr4 | 151551705 | 151552920 | Acot7         | ENSMUSG00000028937 | 69    | 0.15 | 0.11 | 0.11 | 0.13 | 0.08 | 0.1  |
| chr4 | 155215133 | 155216083 | Mxra8         | ENSMUSG00000029070 | -805  | 0.34 | 0.07 | 0.19 | 0.21 | 0.17 | 0.41 |
| chr4 | 11248868  | 11249458  | Gm16652       | ENSMUSG00000086492 | 72    | 0.15 | 0.16 | 0.1  | 0.11 | 0.07 | 0.1  |
| chr4 | 135728180 | 135729132 | E2f2          | ENSMUSG00000018983 | 347   | 0.32 | 0.32 | 0.14 | 0.18 | 0.18 | 0.14 |

|      |           |           |               |                     |       |      |      |      |      |      |      |
|------|-----------|-----------|---------------|---------------------|-------|------|------|------|------|------|------|
| chr4 | 155609946 | 155610697 | Klh17         | ENSMUSG00000078484  | -1355 | 0.63 | 0.18 | 0.13 | 0.18 | 0.39 | 0.09 |
| chr4 | 33296264  | 33296741  | Srsf12        | ENSMUSG00000054679  | 264   | 0.12 | 0.24 | 0.16 | 0.27 | 0.21 | 0.18 |
| chr4 | 108292257 | 108292995 | Gm12743       | ENSMUSG00000084968  | -172  | 0.14 | 0.15 | 0.09 | 0.16 | 0.08 | 0.13 |
| chr4 | 134090316 | 134091409 | Fam54b        | ENSMUSG00000046671  | 97    | 0.26 | 0.15 | 0.09 | 0.18 | 0.15 | 0.14 |
| chr4 | 45985000  | 45985719  | Tdrd7         | ENSMUSG00000035517  | 254   | 0.18 | 0.1  | 0.08 | 0.11 | 0.08 | 0.08 |
| chr4 | 116358069 | 116358702 | Prdx1         | ENSMUSG00000028691  | 236   | 0.05 | 0.08 | 0.12 | 0.17 | 0.14 | 0.14 |
| chr4 | 117963060 | 117963840 | Ptpf          | ENSMUSG00000033295  | 560   | 0.18 | 0.16 | 0.09 | 0.14 | 0.11 | 0.14 |
| chr4 | 140633749 | 140634383 | Necap2        | ENSMUSG00000028923  | 143   | 0.31 | 0.2  | 0.13 | 0.21 | 0.15 | 0.15 |
| chr4 | 147514184 | 147514920 | Mad2l2        | ENSMUSG00000029003  | 261   | 0.75 | 0.32 | 0.17 | 0.13 | 0.14 | 0.16 |
| chr4 | 154338115 | 154338895 | Pank4         | ENSMUSG00000029056  | 273   | 0.18 | 0.16 | 0.07 | 0.1  | 0.09 | 0.13 |
| chr4 | 82150250  | 82152459  | Nfib          | ENSMUSG00000008575  | -142  | 0.23 | 0.14 | 0.12 | 0.17 | 0.14 | 0.19 |
| chr4 | 133036002 | 133036455 | Fam46b        | ENSMUSG00000046694  | 181   | 0.26 | 0.28 | 0.11 | 0.12 | 0.07 | 0.08 |
| chr4 | 33275831  | 33276655  | Pm20d2        | ENSMUSG00000054659  | 165   | 0.15 | 0.14 | 0.1  | 0.17 | 0.08 | 0.11 |
| chr4 | 98483739  | 98484453  | Kank4         | ENSMUSG00000035407  | 132   | 0.21 | 0.11 | 0.09 | 0.16 | 0.09 | 0.11 |
| chr4 | 108452650 | 108453430 | Zfyve9        | ENSMUSG00000034557  | 68    | 0.15 | 0.12 | 0.11 | 0.12 | 0.08 | 0.11 |
| chr4 | 155158306 | 155158627 | Tmem88b       | ENSMUSG00000073680  | 1517  | 0.21 | 0.07 | 0.08 | 0.12 | 0.09 | 0.12 |
| chr4 | 137549872 | 137550260 | Eif4g3        | ENSMUSG00000028760  | 649   | 0.24 | 0.17 | 0.11 | 0.17 | 0.14 | 0.15 |
| chr4 | 12098548  | 12099044  | Fam92a        | ENSMUSG00000028218  | 85    | 0.12 | 0.1  | 0.09 | 0.12 | 0.08 | 0.11 |
| chr4 | 128560810 | 128561839 | Trim62        | ENSMUSG00000041000  | 500   | 0.31 | 0.14 | 0.1  | 0.13 | 0.2  | 0.11 |
| chr4 | 140924053 | 140924456 | Fam131c       | ENSMUSG00000006218  | 119   | 0.22 | 0.22 | 0.15 | 0.18 | 0.08 | 0.12 |
| chr4 | 150431552 | 150432322 | Vamp3         | ENSMUSG00000028955  | 118   | 0.19 | 0.17 | 0.12 | 0.2  | 0.09 | 0.15 |
| chr4 | 109649937 | 109651220 | 3010003L10Rik | ENSMUSG000000085256 | -482  | 0.21 | 0.14 | 0.15 | 0.19 | 0.13 | 0.16 |
| chr4 | 119164823 | 119165371 | Rimk1a        | ENSMUSG00000048899  | 17    | 0.21 | 0.09 | 0.08 | 0.15 | 0.1  | 0.11 |
| chr4 | 89354814  | 89355501  | Dmrta1        | ENSMUSG00000043753  | 268   | 0.57 | 0.15 | 0.14 | 0.2  | 0.15 | 0.12 |
| chr4 | 124527477 | 124528718 | 1110065P20Rik | ENSMUSG00000078570  | -380  | 0.08 | 0.13 | 0.07 | 0.15 | 0.12 | 0.12 |
| chr4 | 134107847 | 134108059 | Sepr1         | ENSMUSG00000050989  | 128   | 0.25 | 0.08 | 0.08 | 0.1  | 0.09 | 0.26 |
| chr4 | 141101445 | 141103046 | B330016D10Rik | ENSMUSG00000048406  | 141   | 0.09 | 0.11 | 0.12 | 0.14 | 0.15 | 0.14 |
| chr4 | 153348692 | 153349731 | Dffb          | ENSMUSG00000029027  | -51   | 0.29 | 0.15 | 0.11 | 0.19 | 0.17 | 0.14 |
| chr4 | 21775075  | 21775701  | Sfrs18        | ENSMUSG00000028248  | 193   | 0.4  | 0.19 | 0.11 | 0.24 | 0.14 | 0.27 |
| chr4 | 126210083 | 126210840 | Eif2c4        | ENSMUSG00000042500  | 241   | 0.07 | 0.08 | 0.1  | 0.13 | 0.11 | 0.12 |



|      |           |           |               |                    |      |      |      |      |      |      |      |
|------|-----------|-----------|---------------|--------------------|------|------|------|------|------|------|------|
| chr4 | 144784536 | 144785032 | Vps13d        | ENSMUSG00000020220 | 114  | 0.15 | 0.17 | 0.12 | 0.14 | 0.07 | 0.13 |
| chr4 | 62874996  | 62877049  | Col27a1       | ENSMUSG00000045672 | 984  | 0.17 | 0.2  | 0.12 | 0.11 | 0.11 | 0.12 |
| chr4 | 108952721 | 108953771 | Eps15         | ENSMUSG00000028552 | 373  | 0.12 | 0.13 | 0.08 | 0.14 | 0.19 | 0.12 |
| chr4 | 117587420 | 117587910 | Ipo13         | ENSMUSG00000033365 | -61  | 0.12 | 0.21 | 0.1  | 0.17 | 0.31 | 0.11 |
| chr4 | 137417905 | 137418529 | Ece1          | ENSMUSG00000057530 | 65   | 0.22 | 0.12 | 0.12 | 0.21 | 0.08 | 0.18 |
| chr4 | 129662378 | 129663683 | Bai2          | ENSMUSG00000028782 | 622  | 0.18 | 0.1  | 0.13 | 0.21 | 0.11 | 0.15 |
| chr4 | 131429306 | 131430298 | Srsf4         | ENSMUSG00000028911 | 270  | 0.12 | 0.15 | 0.12 | 0.11 | 0.08 | 0.12 |
| chr4 | 116269912 | 116270256 | C530005A16Rik | ENSMUSG00000085408 | 151  | 0.27 | 0.19 | 0.1  | 0.25 | 0.1  | 0.12 |
| chr4 | 124479362 | 124479969 | Mtf1          | ENSMUSG00000028890 | -128 | 0.19 | 0.13 | 0.1  | 0.12 | 0.08 | 0.18 |
| chr4 | 15884978  | 15885606  | Nbn           | ENSMUSG00000028224 | 220  | 0.12 | 0.09 | 0.08 | 0.14 | 0.07 | 0.12 |
| chr4 | 53644188  | 53644840  | Fsd11         | ENSMUSG00000054752 | 171  | 0.06 | 0.09 | 0.17 | 0.12 | 0.21 | 0.12 |
| chr4 | 132566868 | 132568526 | Ahdc1         | ENSMUSG00000037692 | 522  | 0.17 | 0.12 | 0.13 | 0.14 | 0.1  | 0.15 |
| chr4 | 141349304 | 141349944 | Casp9         | ENSMUSG00000028914 | 97   | 0.22 | 0.3  | 0.12 | 0.2  | 0.09 | 0.09 |
| chr4 | 86502657  | 86503657  | Rps6          | ENSMUSG00000028495 | 79   | 0.18 | 0.07 | 0.09 | 0.17 | 0.09 | 0.13 |
| chr4 | 88940036  | 88941457  | Cdkn2a        | ENSMUSG00000044303 | -223 | 0.11 | 0.17 | 0.12 | 0.17 | 0.07 | 0.16 |
| chr4 | 57794976  | 57795249  | Akap2         | ENSMUSG00000038729 | 60   | 0.53 | 0.43 | 0.19 | 0.09 | 0.17 | 0.14 |
| chr4 | 40420172  | 40420459  | Tmem215       | ENSMUSG00000046593 | 1102 | 0.77 | 0.53 | 0.4  | 0.74 | 0.44 | 0.42 |
| chr4 | 116806004 | 116806643 | PIK3          | ENSMUSG00000028680 | 81   | 0.21 | 0.1  | 0.09 | 0.11 | 0.12 | 0.14 |
| chr4 | 134953999 | 134954279 | A330049M08Rik | ENSMUSG00000043924 | -34  | 0.27 | 0.18 | 0.08 | 0.1  | 0.14 | 0.12 |
| chr4 | 131392294 | 131394418 | Ptpru         | ENSMUSG00000028909 | 790  | 0.29 | 0.13 | 0.1  | 0.18 | 0.21 | 0.15 |
| chr4 | 150228972 | 150229791 | 1700045H11Rik | ENSMUSG00000078492 | -323 | 0.17 | 0.11 | 0.09 | 0.11 | 0.11 | 0.12 |
| chr4 | 24778003  | 24778347  | Klhl32        | ENSMUSG00000040387 | -97  | 0.12 | 0.11 | 0.07 | 0.15 | 0.07 | 0.13 |
| chr4 | 129011849 | 129013239 | Rbbp4         | ENSMUSG00000057236 | -656 | 0.24 | 0.22 | 0.13 | 0.16 | 0.16 | 0.17 |
| chr4 | 129373781 | 129374248 | Tmem39b       | ENSMUSG00000053730 | -150 | 0.19 | 0.33 | 0.13 | 0.16 | 0.5  | 0.19 |
| chr4 | 91037855  | 91038858  | Elavl2        | ENSMUSG00000008489 | 291  | 0.14 | 0.12 | 0.11 | 0.12 | 0.07 | 0.13 |
| chr4 | 49609733  | 49610707  | 2810432L12Rik | ENSMUSG00000039611 | 122  | 0.26 | 0.23 | 0.11 | 0.16 | 0.16 | 0.13 |
| chr4 | 28740018  | 28742900  | Epha7         | ENSMUSG00000028289 | 1178 | 0.21 | 0.2  | 0.13 | 0.21 | 0.13 | 0.18 |
| chr4 | 45542453  | 45543887  | Shb           | ENSMUSG00000044813 | 32   | 0.16 | 0.15 | 0.08 | 0.13 | 0.09 | 0.14 |
| chr4 | 117540557 | 117540850 | Gm17114       | ENSMUSG00000091237 | 460  | 0.16 | 0.33 | 0.22 | 0.27 | 0.26 | 0.4  |
| chr4 | 151712453 | 151713223 | Chd5          | ENSMUSG00000005045 | 78   | 0.14 | 0.08 | 0.08 | 0.09 | 0.08 | 0.07 |

|      |           |           |            |                    |      |      |      |      |      |      |      |
|------|-----------|-----------|------------|--------------------|------|------|------|------|------|------|------|
| chr4 | 120339124 | 120340062 | Cited4     | ENSMUSG00000070803 | 425  | 0.21 | 0.16 | 0.11 | 0.19 | 0.14 | 0.13 |
| chr4 | 135866384 | 135867652 | Hnmpr      | ENSMUSG00000066037 | 161  | 0.31 | 0.11 | 0.11 | 0.12 | 0.21 | 0.16 |
| chr4 | 110070260 | 110070500 | Agbl4      | ENSMUSG00000061298 | 114  | 0.5  | 0.57 | 0.04 | 0.11 | 0.07 | 0.13 |
| chr4 | 135699506 | 135700819 | ld3        | ENSMUSG00000007872 | 383  | 0.09 | 0.18 | 0.15 | 0.12 | 0.16 | 0.16 |
| chr4 | 145593833 | 145594271 | Gm13240    | ENSMUSG00000081710 | -225 | 0.55 | 0.65 | 0.28 | 0.73 | 0.15 | 0.13 |
| chr4 | 15285734  | 152857546 | Ajap1      | ENSMUSG00000039546 | -352 | 0.19 | 0.17 | 0.09 | 0.18 | 0.14 | 0.13 |
| chr4 | 139802144 | 139802689 | Igsf21     | ENSMUSG00000040972 | 283  | 0.46 | 0.33 | 0.13 | 0.18 | 0.23 | 0.14 |
| chr4 | 101760141 | 101760837 | Pde4b      | ENSMUSG00000028525 | 341  | 0.86 | 0.67 | 0.12 | 0.22 | 0.41 | 0.18 |
| chr4 | 151526081 | 151526603 | Espn       | ENSMUSG00000028943 | -26  | 0.13 | 0.15 | 0.09 | 0.1  | 0.25 | 0.14 |
| chr4 | 133842601 | 133843932 | Pdik1l     | ENSMUSG00000050890 | -126 | 0.19 | 0.21 | 0.1  | 0.14 | 0.13 | 0.18 |
| chr4 | 107704147 | 107704907 | Podn       | ENSMUSG00000028600 | 31   | 0.33 | 0.42 | 0.09 | 0.13 | 0.2  | 0.15 |
| chr4 | 44085184  | 44085718  | Gne        | ENSMUSG00000028479 | 23   | 0.11 | 0.07 | 0.09 | 0.12 | 0.07 | 0.19 |
| chr4 | 58565845  | 58566328  | Lpar1      | ENSMUSG00000038668 | -30  | 0.3  | 0.24 | 0.13 | 0.15 | 0.12 | 0.12 |
| chr4 | 116229637 | 116230723 | Gbbp1l1    | ENSMUSG00000034042 | -83  | 0.18 | 0.09 | 0.09 | 0.17 | 0.11 | 0.15 |
| chr4 | 133035648 | 133035875 | Fam46b     | ENSMUSG00000046694 | -286 | 0.09 | 0.07 | 0.17 | 0.13 | 0.21 | 0.18 |
| chr4 | 134258934 | 134260636 | Man1c1     | ENSMUSG00000037306 | -103 | 0.17 | 0.13 | 0.1  | 0.14 | 0.11 | 0.16 |
| chr4 | 138908093 | 138908664 | Mrto4      | ENSMUSG00000028741 | -165 | 0.19 | 0.1  | 0.12 | 0.18 | 0.09 | 0.21 |
| chr4 | 41082176  | 41083359  | Ube2r2     | ENSMUSG00000036241 | -9   | 0.13 | 0.1  | 0.13 | 0.21 | 0.09 | 0.17 |
| chr4 | 120419381 | 120420230 | Kcnq4      | ENSMUSG00000028631 | 48   | 0.11 | 0.07 | 0.12 | 0.1  | 0.07 | 0.13 |
| chr4 | 132894741 | 132895577 | Wdtdc1     | ENSMUSG00000037622 | 27   | 0.15 | 0.14 | 0.11 | 0.11 | 0.08 | 0.11 |
| chr4 | 88956516  | 88956949  | Cdkn2b     | ENSMUSG00000073802 | 209  | 0.33 | 0.26 | 0.1  | 0.19 | 0.17 | 0.19 |
| chr4 | 8678909   | 8679167   | Chd7       | ENSMUSG00000041235 | 453  | 0.07 | 0.11 | 0.12 | 0.3  | 0.16 | 0.21 |
| chr4 | 132641125 | 132641560 | Gm10151    | ENSMUSG00000066041 | -47  | 0.13 | NA   | 0.14 | 0.23 | 0.5  | 0.36 |
| chr4 | 151382731 | 151384071 | Klhl21     | ENSMUSG00000073700 | 489  | 0.14 | 0.05 | 0.09 | 0.09 | 0.08 | 0.12 |
| chr4 | 132478017 | 132478897 | Fam76a     | ENSMUSG00000028878 | -49  | 0.28 | 0.13 | 0.12 | 0.13 | 0.16 | 0.13 |
| chr4 | 116299415 | 116299975 | Nasp       | ENSMUSG00000028693 | 358  | 0.44 | 0.5  | 0.17 | 0.24 | 0.24 | 0.25 |
| chr4 | 137772314 | 137773600 | Hp1bp3     | ENSMUSG00000028759 | 442  | 0.14 | 0.15 | 0.11 | 0.11 | 0.1  | 0.14 |
| chr4 | 3762201   | 3762961   | snoU54     | ENSMUSG00000088351 | -288 | 0.25 | 0.32 | 0.17 | 0.26 | 0.14 | 0.14 |
| chr4 | 133801147 | 133801706 | Zfp593     | ENSMUSG00000028840 | 31   | 0.09 | 0.14 | 0.08 | 0.18 | 0.05 | 0.12 |
| chr4 | 107106854 | 107108574 | AL626784.1 | ENSMUSG00000092723 | 537  | 0.15 | 0.2  | 0.15 | 0.16 | 0.11 | 0.15 |

|      |           |           |               |                    |      |      |      |      |      |      |      |
|------|-----------|-----------|---------------|--------------------|------|------|------|------|------|------|------|
| chr4 | 117222820 | 117223241 | Eri3          | ENSMUSG00000033423 | 60   | 0.24 | 0.27 | 0.12 | 0.18 | 0.49 | 0.1  |
| chr4 | 19496717  | 19497313  | Cpne3         | ENSMUSG00000028228 | 215  | 0.24 | 0.1  | 0.09 | 0.16 | 0.16 | 0.1  |
| chr4 | 114659302 | 114659746 | Cmpk1         | ENSMUSG00000028719 | 153  | 0.26 | 0.14 | 0.13 | 0.13 | 0.16 | 0.16 |
| chr4 | 49857562  | 49858792  | Grin3a        | ENSMUSG00000039579 | 244  | 0.11 | 0.11 | 0.12 | 0.17 | 0.06 | 0.14 |
| chr4 | 133312501 | 133312859 | Arid1a        | ENSMUSG00000007880 | 4    | 0.31 | 0.11 | 0.14 | 0.16 | 0.15 | 0.15 |
| chr4 | 154998633 | 154999258 | Gm16023       | ENSMUSG00000086682 | -81  | 0.17 | 0.17 | 0.12 | 0.18 | 0.26 | 0.17 |
| chr4 | 133140080 | 133140747 | Gpn2          | ENSMUSG00000028848 | 136  | 0.5  | 0.42 | 0.11 | 0.15 | 0.19 | 0.19 |
| chr4 | 154937836 | 154938402 | Nadk          | ENSMUSG00000029063 | 184  | 0.2  | 0.2  | 0.16 | 0.16 | 0.33 | 0.24 |
| chr4 | 42962592  | 42963241  | Dnajb5        | ENSMUSG00000036052 | 230  | 0.17 | 0.13 | 0.08 | 0.15 | 0.09 | 0.15 |
| chr4 | 56959563  | 56960402  | D730040F13Rik | ENSMUSG00000055296 | 301  | 0.2  | 0.11 | 0.12 | 0.22 | 0.09 | 0.2  |
| chr4 | 109329741 | 109330324 | 9630013D21Rik | ENSMUSG00000059027 | 181  | 0.14 | 0.27 | 0.1  | 0.18 | 0.09 | 0.16 |
| chr4 | 155068237 | 155069297 | B930041F14Rik | ENSMUSG00000074738 | 316  | 0.31 | 0.18 | 0.12 | 0.1  | 0.15 | 0.1  |
| chr4 | 43012584  | 43013522  | Vcp           | ENSMUSG00000028452 | 252  | 0.1  | 0.12 | 0.1  | 0.15 | 0.05 | 0.16 |
| chr4 | 77857612  | 77857895  | Ptprd         | ENSMUSG00000028399 | -110 | 0.9  | 0.59 | 0.13 | 0.15 | 0.33 | 0.09 |
| chr4 | 99601985  | 99602768  | Pgm2          | ENSMUSG00000025791 | 357  | 0.67 | 0.3  | 0.13 | 0.23 | 0.15 | 0.12 |
| chr4 | 106136486 | 106136853 | Pcsk9         | ENSMUSG00000044254 | 265  | 0.21 | 0.12 | 0.12 | 0.16 | 0.1  | 0.19 |
| chr4 | 111087364 | 111088118 | Bend5         | ENSMUSG00000028545 | 130  | 0.4  | 0.13 | 0.12 | 0.23 | 0.16 | 0.17 |
| chr4 | 132065892 | 132066543 | Sesn2         | ENSMUSG00000028893 | 199  | 0.18 | 0.08 | 0.11 | 0.15 | 0.13 | 0.15 |
| chr4 | 154008891 | 154012106 | Prdm16        | ENSMUSG00000039410 | 371  | 0.15 | 0.21 | 0.13 | 0.17 | 0.13 | 0.16 |
| chr4 | 74923965  | 74924302  | 3110001D03Rik | ENSMUSG00000028398 | 76   | 0.25 | 0.21 | 0.09 | 0.15 | 0.08 | 0.26 |
| chr4 | 116828114 | 116828839 | Snord55       | ENSMUSG00000092680 | -23  | 0.21 | 0.14 | 0.08 | 0.14 | 0.11 | 0.17 |
| chr4 | 125933003 | 125933861 | Mtap7d1       | ENSMUSG00000028849 | 89   | 0.19 | 0.15 | 0.1  | 0.17 | 0.11 | 0.16 |
| chr4 | 155365931 | 155367626 | B3galt6       | ENSMUSG00000050796 | 9    | 0.1  | 0.13 | 0.1  | 0.13 | 0.13 | 0.13 |
| chr4 | 106295000 | 106295704 | Ttc22         | ENSMUSG00000034919 | 315  | 0.22 | 0.41 | 0.24 | 0.28 | 0.28 | 0.27 |
| chr4 | 135476602 | 135477178 | Fuca1         | ENSMUSG00000028673 | 240  | 0.05 | 0.08 | 0.07 | 0.13 | 0.1  | 0.14 |
| chr4 | 42929826  | 42930472  | N28178        | ENSMUSG00000036062 | 26   | 0.17 | 0.19 | 0.09 | 0.14 | 0.12 | 0.09 |
| chr4 | 45097014  | 45097654  | Fbxo10        | ENSMUSG00000048232 | 142  | 0.11 | 0.16 | 0.08 | 0.1  | 0.08 | 0.09 |
| chr4 | 125939473 | 125939819 | Trappc3       | ENSMUSG00000028847 | 77   | 0.12 | 0.13 | 0.13 | 0.13 | 0.08 | 0.13 |
| chr4 | 148178265 | 148181221 | Casz1         | ENSMUSG00000028977 | 1205 | 0.1  | 0.11 | 0.1  | 0.2  | 0.07 | 0.17 |
| chr4 | 155177505 | 155178061 | Mrpl20        | ENSMUSG00000029066 | 138  | 0.41 | 0.28 | 0.29 | 0.28 | 0.14 | 0.2  |

|      |           |           |          |                    |      |      |      |      |      |      |      |
|------|-----------|-----------|----------|--------------------|------|------|------|------|------|------|------|
| chr4 | 136832697 | 136834041 | Wnt4     | ENSMUSG00000036856 | -35  | 0.16 | 0.19 | 0.1  | 0.19 | 0.13 | 0.13 |
| chr4 | 15872294  | 15872768  | Decr1    | ENSMUSG00000028223 | -109 | 0.28 | 0.47 | 0.14 | 0.24 | 0.13 | 0.1  |
| chr4 | 46614039  | 46615164  | Coro2a   | ENSMUSG00000028337 | 162  | 0.22 | 0.13 | 0.1  | 0.15 | 0.12 | 0.13 |
| chr4 | 47365280  | 47366826  | Tgfb1    | ENSMUSG00000007613 | -41  | 0.25 | 0.29 | 0.14 | 0.18 | 0.17 | 0.2  |
| chr4 | 105988321 | 105989550 | Usp24    | ENSMUSG00000028514 | 117  | 0.16 | 0.1  | 0.11 | 0.16 | 0.13 | 0.17 |
| chr4 | 142984209 | 142984756 | Pramel1  | ENSMUSG00000041805 | 151  | 0.86 | 1    | 0.84 | 0.95 | 0.95 | 0.98 |
| chr4 | 148859157 | 148859690 | Nmnat1   | ENSMUSG00000028992 | -151 | 0.09 | 0.19 | 0.08 | 0.12 | 0.2  | 0.15 |
| chr4 | 81088170  | 81088848  | Mpdz     | ENSMUSG00000028402 | 200  | 0.11 | 0.09 | 0.16 | 0.15 | 0.07 | 0.15 |
| chr4 | 116691874 | 116692279 | Eif2b3   | ENSMUSG00000028683 | 69   | 0.1  | 0.07 | 0.09 | 0.15 | 0.06 | 0.14 |
| chr4 | 117555553 | 117556074 | B4galt2  | ENSMUSG00000028541 | -96  | 0.2  | 0.17 | 0.1  | 0.15 | 0.1  | 0.09 |
| chr4 | 118781290 | 118781875 | Slc2a1   | ENSMUSG00000028645 | 266  | 0.21 | 0.11 | 0.11 | 0.23 | 0.1  | 0.2  |
| chr4 | 137950802 | 137952476 | AB041806 | ENSMUSG00000046109 | 526  | 0.18 | 0.1  | 0.12 | 0.14 | 0.13 | 0.1  |
| chr4 | 154735086 | 154736196 | Prkcz    | ENSMUSG00000029053 | -192 | 0.09 | 0.06 | 0.11 | 0.12 | 0.06 | 0.12 |
| chr4 | 99768360  | 99769031  | Ror1     | ENSMUSG00000035305 | 299  | 0.17 | 0.29 | 0.13 | 0.14 | 0.11 | 0.14 |
| chr4 | 119406160 | 119406938 | Hivep3   | ENSMUSG00000028634 | 160  | 1    | 0.28 | 0.07 | 0.16 | 0.1  | 0.1  |
| chr4 | 44025552  | 44026107  | Cita     | ENSMUSG00000028478 | 273  | 0.1  | 0.13 | 0.13 | 0.15 | 0.21 | 0.15 |
| chr4 | 106583322 | 106585122 | Ssbp3    | ENSMUSG00000061887 | 147  | 0.18 | 0.11 | 0.11 | 0.12 | 0.15 | 0.11 |
| chr4 | 119087788 | 119088193 | Ccdc30   | ENSMUSG00000028637 | 136  | 0.33 | 0.1  | 0.12 | 0.11 | 0.07 | 0.15 |
| chr4 | 124743794 | 124744395 | Snip1    | ENSMUSG00000050213 | 178  | 0.13 | 0.07 | 0.07 | 0.11 | 0.08 | 0.16 |
| chr4 | 141346238 | 141346879 | Dnajc16  | ENSMUSG00000040697 | 248  | 0.32 | 0.1  | 0.1  | 0.15 | 0.18 | 0.12 |
| chr4 | 155108936 | 155109704 | Gm5151   | ENSMUSG00000084845 | 337  | 0.23 | 0.1  | 0.09 | 0.13 | 0.17 | 0.09 |
| chr4 | 101320216 | 101320639 | Leprot   | ENSMUSG00000035212 | 104  | 1    | 0.38 | 0.1  | 0.09 | 0.08 | 0.17 |
| chr4 | 117354519 | 117355008 | Dmap1    | ENSMUSG00000009640 | -175 | 0.67 | 0.24 | 0.17 | 0.25 | 0.18 | 0.11 |
| chr4 | 122878565 | 122878868 | Nt5c1a   | ENSMUSG00000054958 | -31  | 0.19 | 0.11 | 0.11 | 0.21 | 0.35 | 0.22 |
| chr4 | 125735525 | 125736052 | Oscp1    | ENSMUSG00000042616 | -21  | 0.2  | 0.11 | 0.12 | 0.12 | 0.12 | 0.19 |
| chr4 | 132398976 | 132399301 | Ppp1r8   | ENSMUSG00000028882 | -100 | 0.16 | 0.12 | 0.1  | 0.15 | 0.07 | 0.28 |
| chr4 | 137237442 | 137237811 | Rap1gap  | ENSMUSG00000041351 | 8    | 0.26 | 0.16 | 0.19 | 0.16 | 0.2  | 0.16 |
| chr4 | 140703674 | 140704509 | Fbxo42   | ENSMUSG00000028920 | 263  | 0.21 | 0.11 | 0.09 | 0.13 | 0.12 | 0.13 |
| chr4 | 153513791 | 153514714 | Trp73    | ENSMUSG00000029026 | 65   | 0.16 | 0.15 | 0.12 | 0.17 | 0.1  | 0.18 |
| chr4 | 11893031  | 11894114  | Pdp1     | ENSMUSG00000049225 | -498 | 0.1  | 0.13 | 0.09 | 0.11 | 0.08 | 0.1  |

|      |           |           |         |                    |      |      |      |      |      |      |      |
|------|-----------|-----------|---------|--------------------|------|------|------|------|------|------|------|
| chr4 | 71860679  | 71862709  | Tle1    | ENSMUSG00000008305 | -508 | 0.19 | 0.1  | 0.08 | 0.14 | 0.12 | 0.14 |
| chr4 | 150283655 | 150284184 | Park7   | ENSMUSG00000028964 | -184 | 0.33 | 0.49 | 0.12 | 0.21 | 0.57 | 0.17 |
| chr4 | 3605249   | 3605852   | Lyn     | ENSMUSG00000042228 | 288  | 0.22 | 0.16 | 0.11 | 0.18 | 0.11 | 0.12 |
| chr4 | 3864656   | 3866466   | Plag1   | ENSMUSG00000003282 | -32  | 0.42 | 0.22 | 0.19 | 0.23 | 0.26 | 0.3  |
| chr4 | 41411589  | 41412332  | Kif24   | ENSMUSG00000028438 | -87  | 0.29 | 0.41 | 0.1  | 0.16 | 0.13 | 0.18 |
| chr4 | 62069705  | 62070024  | Prpf4   | ENSMUSG00000066148 | 33   | 0.13 | 0.07 | 0.06 | 0.08 | 0.09 | 0.12 |
| chr4 | 94269385  | 94270209  | Plaa    | ENSMUSG00000028577 | 29   | 0.18 | 0.12 | 0.1  | 0.15 | 0.09 | 0.14 |
| chr4 | 106233410 | 106234112 | Dhcr24  | ENSMUSG00000034926 | 118  | 0.17 | 0.19 | 0.09 | 0.15 | 0.11 | 0.14 |
| chr4 | 106323535 | 106323906 | Pars2   | ENSMUSG00000043572 | 46   | 0.14 | 0.33 | 0.15 | 0.17 | 0.08 | 0.11 |
| chr4 | 126412430 | 126413550 | Tfap2e  | ENSMUSG00000042477 | 494  | 0.1  | 0.11 | 0.12 | 0.22 | 0.18 | 0.14 |
| chr4 | 133228246 | 133228864 | Pigv    | ENSMUSG00000043257 | 7    | 0.23 | 0.16 | 0.11 | 0.11 | 0.17 | 0.15 |
| chr4 | 147461836 | 147462213 | Agtrap  | ENSMUSG00000029007 | 116  | 0.14 | 0.1  | 0.11 | 0.13 | 0.08 | 0.15 |
| chr4 | 155265151 | 155266785 | Pusl1   | ENSMUSG00000051557 | -650 | 0.15 | 0.1  | 0.08 | 0.12 | 0.11 | 0.12 |
| chr4 | 45421132  | 45421931  | Mcart1  | ENSMUSG00000045973 | -13  | 0.14 | 0.28 | 0.1  | 0.19 | 0.09 | 0.14 |
| chr4 | 47069773  | 47070488  | Anks6   | ENSMUSG00000066191 | 48   | 0.06 | 0.09 | 0.08 | 0.14 | 0.09 | 0.14 |
| chr4 | 59047934  | 59048469  | Gng10   | ENSMUSG00000038607 | 241  | 0.12 | 0.06 | 0.08 | 0.17 | 0.07 | 0.18 |
| chr4 | 109338282 | 109339778 | Cdkn2c  | ENSMUSG00000028551 | 764  | 0.13 | 0.26 | 0.1  | 0.15 | 0.1  | 0.11 |
| chr4 | 114728986 | 114730500 | Tal1    | ENSMUSG00000028717 | 712  | 0.22 | 0.15 | 0.08 | 0.19 | 0.14 | 0.18 |
| chr4 | 124334025 | 124337004 | Pou3f1  | ENSMUSG00000078236 | 1464 | 0.2  | 0.19 | 0.12 | 0.15 | 0.16 | 0.18 |
| chr4 | 140864368 | 140864993 | Epha2   | ENSMUSG00000006445 | -129 | 0.85 | 0.92 | 0.86 | 0.91 | 0.8  | 0.92 |
| chr4 | 36898378  | 36898744  | Lingo2  | ENSMUSG00000052961 | 215  | 0.06 | 0.34 | 0.15 | 0.49 | 0.22 | 0.17 |
| chr4 | 43455000  | 43456556  | Tesk1   | ENSMUSG00000028458 | -415 | 0.17 | 0.15 | 0.11 | 0.19 | 0.14 | 0.16 |
| chr4 | 63155658  | 63157167  | Whrn    | ENSMUSG00000039137 | -701 | 0.2  | 0.14 | 0.1  | 0.15 | 0.17 | 0.17 |
| chr4 | 135502311 | 135502697 | Hmgcl   | ENSMUSG00000028672 | 141  | 0.1  | 0.18 | 0.13 | 0.14 | 0.2  | 0.13 |
| chr4 | 144482158 | 144482781 | Dhrs3   | ENSMUSG00000066026 | -261 | 0.14 | 0.06 | 0.07 | 0.17 | 0.06 | 0.12 |
| chr4 | 41670014  | 41670307  | Dctn3   | ENSMUSG00000028447 | 9    | 0.15 | 0.14 | 0.08 | 0.18 | 0.07 | 0.15 |
| chr4 | 59594131  | 59594898  | Hsdl2   | ENSMUSG00000028383 | 79   | 0.13 | 0.22 | 0.12 | 0.23 | 0.2  | 0.12 |
| chr4 | 64785480  | 64785948  | Pappa   | ENSMUSG00000028370 | 506  | 0.07 | 0.06 | 0.07 | 0.12 | 0.04 | 0.08 |
| chr4 | 108131835 | 108133119 | Zcchc11 | ENSMUSG00000034610 | 446  | 0.2  | 0.08 | 0.11 | 0.16 | 0.12 | 0.22 |
| chr4 | 115457428 | 115457986 | Atpaf1  | ENSMUSG00000028710 | 118  | 0.08 | 0.17 | 0.1  | 0.13 | 0.12 | 0.15 |

|      |           |           |               |                    |       |      |      |      |      |      |      |
|------|-----------|-----------|---------------|--------------------|-------|------|------|------|------|------|------|
| chr4 | 4719641   | 4720579   | Impad1        | ENSMUSG00000066324 | 392   | 0.18 | 0.25 | 0.11 | 0.18 | 0.26 | 0.15 |
| chr4 | 66064687  | 66065219  | Astn2         | ENSMUSG00000028373 | 547   | 0.14 | 0.11 | 0.1  | 0.13 | 0.09 | 0.17 |
| chr4 | 120887246 | 120887878 | Rlf           | ENSMUSG00000049878 | 127   | 0.15 | 0.12 | 0.13 | 0.19 | 0.22 | 0.15 |
| chr4 | 48055744  | 48056363  | Nr4a3         | ENSMUSG00000028341 | -1972 | 0.2  | 0.09 | 0.16 | 0.1  | 0.06 | 0.2  |
| chr4 | 108505868 | 108506405 | Btf3l4        | ENSMUSG00000028568 | 23    | 0.24 | 0.42 | 0.12 | 0.11 | 0.38 | 0.17 |
| chr4 | 126803136 | 126803508 | Gm12942       | ENSMUSG00000070737 | 32    | 0.38 | 0.32 | 0.13 | 0.26 | 0.24 | 0.18 |
| chr4 | 84530073  | 84530865  | Cntln         | ENSMUSG00000038070 | 256   | 0.2  | 0.38 | 0.12 | 0.28 | 0.12 | 0.26 |
| chr4 | 102986278 | 102986780 | Oma1          | ENSMUSG00000035069 | 112   | 0.35 | 0.63 | 0.09 | 0.15 | 0.52 | 0.17 |
| chr4 | 120623975 | 120624509 | Zfp69         | ENSMUSG00000064141 | 62    | 0.18 | 0.26 | 0.12 | 0.15 | 0.15 | 0.15 |
| chr4 | 131816903 | 131817105 | Gmeb1         | ENSMUSG00000028901 | 432   | 1    | NA   | 0.13 | 0.19 | 0.33 | 0.13 |
| chr4 | 46151143  | 46151922  | Tstd2         | ENSMUSG00000035495 | -251  | 0.09 | 0.17 | 0.09 | 0.18 | 0.07 | 0.11 |
| chr4 | 48552798  | 48553205  | 5730528L13Rik | ENSMUSG00000039693 | 194   | 0.19 | 0.13 | 0.14 | 0.18 | 0.09 | 0.11 |
| chr4 | 107040362 | 107040900 | Tmem48        | ENSMUSG00000028614 | 242   | 0.3  | 0.09 | 0.11 | 0.14 | 0.21 | 0.12 |
| chr4 | 116549609 | 116550692 | Zswim5        | ENSMUSG00000033948 | 169   | 0.11 | 0.09 | 0.09 | 0.09 | 0.09 | 0.1  |
| chr4 | 118109553 | 118110183 | Cdc20         | ENSMUSG00000006398 | 17    | 0.13 | 0.35 | 0.15 | 0.17 | 0.22 | 0.2  |
| chr4 | 118966288 | 118967599 | Ybx1          | ENSMUSG00000028639 | 142   | 0.15 | 0.2  | 0.11 | 0.15 | 0.17 | 0.16 |
| chr4 | 140616020 | 140617048 | Crocc         | ENSMUSG00000040860 | -74   | 0.5  | 0.24 | 0.13 | 0.13 | 0.34 | 0.15 |
| chr4 | 151660333 | 151661328 | Hes3          | ENSMUSG00000028946 | 1339  | 0.2  | 0.15 | 0.2  | 0.18 | 0.14 | 0.22 |
| chr4 | 135528303 | 135528607 | Lypla2        | ENSMUSG00000028670 | 48    | 0.7  | 0.3  | 0.23 | 0.22 | 1    | 0.43 |
| chr4 | 11180827  | 11181459  | Ints8         | ENSMUSG00000040738 | 262   | 0.14 | 0.11 | 0.11 | 0.17 | 0.1  | 0.15 |
| chr4 | 114494281 | 114494662 | Gm12830       | ENSMUSG00000055198 | 144   | 0.6  | 0.38 | 0.12 | 0.3  | 0.25 | 0.3  |
| chr4 | 117806981 | 117807749 | St3gal3       | ENSMUSG00000028538 | 122   | 0.27 | 0.18 | 0.11 | 0.17 | 0.21 | 0.13 |
| chr4 | 14753491  | 14753890  | Otud6b        | ENSMUSG00000040550 | -148  | 0.12 | 0.1  | 0.15 | 0.19 | 0.15 | 0.13 |
| chr4 | 22414360  | 22415321  | Pou3f2        | ENSMUSG00000052621 | 640   | 1    | NA   | 0.21 | 0.3  | 0.5  | NA   |
| chr4 | 86876051  | 86876492  | Slc24a2       | ENSMUSG00000037996 | 55    | 0.44 | 0.36 | 0.13 | 0.34 | 0.23 | 0.14 |
| chr4 | 98787029  | 98787844  | Dock7         | ENSMUSG00000028556 | 115   | 0.11 | 0.16 | 0.11 | 0.13 | 0.16 | 0.11 |
| chr4 | 129815684 | 129816649 | Hcrt1         | ENSMUSG00000028778 | -371  | 0.21 | 0.2  | 0.14 | 0.16 | 0.16 | 0.19 |
| chr4 | 136249715 | 136249951 | Ephb2         | ENSMUSG00000028664 | 122   | 0.8  | 0.85 | 0.84 | 0.91 | 0.94 | 0.94 |
| chr4 | 138629983 | 138631647 | Htr6          | ENSMUSG00000028747 | -111  | 0.11 | 0.11 | 0.08 | 0.11 | 0.09 | 0.15 |
| chr4 | 150026083 | 150026299 | Slc45a1       | ENSMUSG00000039838 | 15    | 0.15 | 0.19 | 0.12 | 0.18 | 0.2  | 0.16 |

|      |           |           |               |                    |      |      |      |      |      |      |      |
|------|-----------|-----------|---------------|--------------------|------|------|------|------|------|------|------|
| chr4 | 106925892 | 106926700 | Lrrc42        | ENSMUSG00000028617 | -159 | 0.05 | 0.15 | 0.1  | 0.15 | 0.1  | 0.12 |
| chr4 | 131630590 | 131631387 | Gm10300       | ENSMUSG00000070717 | 376  | 0.28 | 0.27 | 0.19 | 0.22 | 0.22 | 0.18 |
| chr4 | 148000382 | 148001265 | Tardbp        | ENSMUSG00000041459 | 43   | 0.09 | 0.09 | 0.09 | 0.15 | 0.06 | 0.16 |
| chr4 | 138936289 | 138936906 | 2700016F22Rik | ENSMUSG00000091188 | -303 | 0.07 | 0.09 | 0.09 | 0.16 | 0.11 | 0.1  |
| chr4 | 53838874  | 53839202  | Tmem38b       | ENSMUSG00000028420 | 121  | 1    | 0.4  | 0.23 | 0.29 | 0.14 | 0.14 |
| chr4 | 123594377 | 123595354 | Gm12905       | ENSMUSG00000085875 | -353 | 0.19 | 0.12 | 0.1  | 0.17 | 0.13 | 0.12 |
| chr4 | 134024188 | 134025073 | Stmn1         | ENSMUSG00000028832 | 395  | 0.29 | 0.29 | 0.15 | 0.1  | 0.24 | 0.17 |
| chr4 | 136604034 | 136604795 | Zbtb40        | ENSMUSG00000060862 | 196  | 0.17 | 0.06 | 0.13 | 0.12 | 0.1  | 0.09 |
| chr4 | 99322636  | 99324789  | Foxd3         | ENSMUSG00000067261 | 722  | 0.08 | 0.13 | 0.12 | 0.14 | 0.1  | 0.14 |
| chr4 | 127648783 | 127649029 | CK137956      | ENSMUSG00000028813 | -711 | 0.1  | 0.08 | 0.34 | 0.54 | 0.14 | 0.4  |
| chr4 | 128735201 | 128736184 | 1700086P04Rik | ENSMUSG00000085085 | -465 | 0.18 | 0.17 | 0.12 | 0.11 | 0.14 | 0.1  |
| chr4 | 155577170 | 155577953 | AW011738      | ENSMUSG00000078349 | 148  | 0.19 | 0.19 | 0.17 | 0.28 | 0.12 | 0.15 |
| chr4 | 138009914 | 138011504 | Camk2n1       | ENSMUSG00000046447 | 480  | 0.15 | 0.11 | 0.08 | 0.18 | 0.12 | 0.14 |
| chr4 | 13670131  | 13670991  | Runx111       | ENSMUSG0000006586  | -22  | 0.15 | 0.14 | 0.1  | 0.13 | 0.1  | 0.14 |
| chr4 | 45120437  | 45120912  | Tomm5         | ENSMUSG00000078713 | 236  | 0.07 | 0.19 | 0.12 | 0.13 | 0.21 | 0.1  |
| chr4 | 55543043  | 55546164  | Klf4          | ENSMUSG0000003032  | 39   | 0.12 | 0.14 | 0.15 | 0.13 | 0.1  | 0.15 |
| chr4 | 97443863  | 97445587  | Nfia          | ENSMUSG00000028565 | 426  | 0.21 | 0.28 | 0.14 | 0.12 | 0.13 | 0.11 |
| chr4 | 120242136 | 120243309 | Ctps          | ENSMUSG00000028633 | 159  | 0.15 | 0.18 | 0.1  | 0.18 | 0.19 | 0.17 |
| chr4 | 131830019 | 131830348 | Taf12         | ENSMUSG00000028899 | -107 | 0.22 | 0.11 | 0.24 | 0.28 | 0.12 | 0.2  |
| chr4 | 135762098 | 135762578 | Asap3         | ENSMUSG00000036995 | 58   | 0.24 | 0.62 | 0.11 | 0.17 | 0.33 | 0.13 |
| chr4 | 147412473 | 147413350 | Clcn6         | ENSMUSG00000029016 | -240 | 0.21 | 0.17 | 0.08 | 0.15 | 0.1  | 0.14 |
| chr4 | 6118071   | 6118418   | Ubxn2b        | ENSMUSG00000028243 | -1   | 0.31 | 0.15 | 0.13 | 0.14 | 0.18 | 0.25 |
| chr4 | 106986782 | 106987004 | Yipf1         | ENSMUSG00000057375 | -75  | 1    | 0.23 | 0.26 | 0.22 | 0.15 | 0.25 |
| chr4 | 117166964 | 117169314 | Rnf220        | ENSMUSG00000028677 | -523 | 0.18 | 0.19 | 0.12 | 0.18 | 0.16 | 0.14 |
| chr4 | 151699773 | 151700383 | Rpl22         | ENSMUSG00000028936 | 227  | 0.1  | 0.13 | 0.08 | 0.08 | 0.06 | 0.1  |
| chr4 | 33397128  | 33397630  | Rngtt         | ENSMUSG00000028274 | 93   | 0.33 | 0.27 | 0.15 | 0.15 | 0.22 | 0.16 |
| chr4 | 41678056  | 41678551  | Arid3c        | ENSMUSG00000066224 | -129 | 0.04 | 0.11 | 0.12 | 0.08 | 0.1  | 0.12 |
| chr4 | 57312598  | 57313238  | Gm12536       | ENSMUSG00000085654 | -50  | 0.17 | 0.16 | 0.09 | 0.11 | 0.09 | 0.16 |
| chr4 | 117401989 | 117402194 | Gm12844       | ENSMUSG00000084260 | -187 | 0.56 | 0.8  | 0.67 | 0.52 | 0.71 | 0.94 |
| chr4 | 124663504 | 124664392 | Rspo1         | ENSMUSG00000028871 | 274  | 0.11 | 0.1  | 0.09 | 0.11 | 0.08 | 0.14 |

|      |           |           |               |                     |      |      |      |      |      |      |      |
|------|-----------|-----------|---------------|---------------------|------|------|------|------|------|------|------|
| chr4 | 14857461  | 14858115  | Gm11837       | ENSMUSG00000086587  | -20  | 0.07 | 0.09 | 0.09 | 0.11 | 0.09 | 0.12 |
| chr4 | 46051992  | 46052672  | Tmod1         | ENSMUSG00000028328  | 251  | 0.22 | 0.28 | 0.09 | 0.11 | 0.12 | 0.11 |
| chr4 | 46502029  | 46502593  | Nans          | ENSMUSG00000028334  | 191  | 0.08 | 0.06 | 0.08 | 0.14 | 0.07 | 0.15 |
| chr4 | 91067259  | 91067562  | Elavl2        | ENSMUSG00000008489  | 66   | 0.07 | 0.09 | 0.11 | 0.14 | 0.13 | 0.18 |
| chr4 | 102786529 | 102787487 | Wdr78         | ENSMUSG000000035126 | -179 | 0.15 | 0.13 | 0.13 | 0.14 | 0.12 | 0.16 |
| chr4 | 136025614 | 136026668 | Luzp1         | ENSMUSG00000001089  | 465  | 0.23 | 0.1  | 0.11 | 0.12 | 0.2  | 0.12 |
| chr4 | 137806081 | 137806719 | Sh2d5         | ENSMUSG000000045349 | 82   | 0.11 | 0.04 | 0.07 | 0.11 | 0.06 | 0.09 |
| chr4 | 148681201 | 148682335 | Kif1b         | ENSMUSG000000063077 | -153 | 0.15 | 0.11 | 0.12 | 0.12 | 0.17 | 0.15 |
| chr4 | 151664354 | 151664839 | Hes3          | ENSMUSG000000028946 | 1175 | 0.07 | 0.08 | 0.12 | 0.12 | 0.11 | 0.17 |
| chr4 | 5571230   | 5571791   | Fam110b       | ENSMUSG000000049119 | 273  | 0.33 | 0.22 | 0.18 | 0.17 | 0.19 | 0.16 |
| chr4 | 133523068 | 133524340 | Hmgn2         | ENSMUSG00000003038  | -546 | 0.33 | 0.21 | 0.12 | 0.2  | 0.24 | 0.11 |
| chr4 | 43429061  | 43429281  | Rusc2         | ENSMUSG000000035969 | -139 | 1    | 1    | 0.99 | 0.94 | 0.83 | 0.99 |
| chr4 | 124428559 | 124429324 | Gm12915       | ENSMUSG000000086589 | -343 | 0.13 | 0.17 | 0.15 | 0.13 | 0.08 | 0.13 |
| chr4 | 151687165 | 151687515 | Rnf207        | ENSMUSG000000058498 | 117  | 0.12 | 0.24 | 0.15 | 0.13 | 0.2  | 0.13 |
| chr4 | 101028659 | 101029536 | E130102H24Rik | ENSMUSG000000086782 | -244 | 0.12 | 0.08 | 0.13 | 0.12 | 0.1  | 0.17 |
| chr4 | 101222849 | 101223506 | Dnajc6        | ENSMUSG000000028528 | 92   | 0.07 | 0.11 | 0.09 | 0.12 | 0.05 | 0.11 |
| chr4 | 115816939 | 115817286 | 1520402A15Rik | ENSMUSG000000028701 | 102  | 0.15 | 0.1  | 0.1  | 0.14 | 0.1  | 0.21 |
| chr4 | 124391897 | 124392603 | Sf3a3         | ENSMUSG000000028902 | 230  | 0.16 | 0.15 | 0.18 | 0.12 | 0.1  | 0.2  |
| chr4 | 128670290 | 128670827 | Ak2           | ENSMUSG000000028792 | 90   | 0.39 | 0.19 | 0.1  | 0.13 | 0.26 | 0.18 |
| chr4 | 138686069 | 138687070 | Minos1        | ENSMUSG000000050608 | 340  | 0.13 | 0.22 | 0.08 | 0.15 | 0.09 | 0.09 |
| chr4 | 129985657 | 129986153 | Fabp3         | ENSMUSG000000028773 | 66   | 0.25 | 0.33 | 0.25 | 0.2  | 0.5  | 0.21 |
| chr4 | 154865144 | 154866631 | Gnb1          | ENSMUSG000000029064 | 417  | 0.13 | 0.13 | 0.09 | 0.17 | 0.11 | 0.13 |
| chr4 | 34561986  | 34562374  | Orc3          | ENSMUSG000000040044 | -38  | 0.11 | 0.08 | 0.13 | 0.14 | 0.09 | 0.13 |
| chr4 | 116667959 | 116668386 | Hectd3        | ENSMUSG000000046861 | 250  | 0.11 | 0.14 | 0.08 | 0.15 | 0.15 | 0.13 |
| chr4 | 131700050 | 131700643 | Oprd1         | ENSMUSG000000050511 | 55   | 0.18 | 0.09 | 0.09 | 0.11 | 0.13 | 0.15 |
| chr4 | 133807218 | 133808052 | Grrp1         | ENSMUSG000000050105 | 1303 | 0.15 | 0.24 | 0.16 | 0.16 | 0.22 | 0.25 |
| chr4 | 141430547 | 141430947 | Efd2          | ENSMUSG000000040659 | 88   | 0.07 | 0.1  | 0.08 | 0.11 | 0.09 | 0.09 |
| chr4 | 151307688 | 151308675 | Dnajc11       | ENSMUSG000000039768 | 381  | 0.1  | 0.09 | 0.08 | 0.13 | 0.08 | 0.11 |
| chr4 | 104829918 | 104831071 | Ppap2b        | ENSMUSG000000028517 | 542  | 0.13 | 0.17 | 0.12 | 0.14 | 0.09 | 0.13 |
| chr4 | 115611523 | 115612814 | Dmbx1         | ENSMUSG000000028707 | 363  | 0.33 | 0.15 | 0.11 | 0.14 | 0.18 | 0.17 |



|      |           |           |               |                    |       |      |      |      |      |      |      |
|------|-----------|-----------|---------------|--------------------|-------|------|------|------|------|------|------|
| chr4 | 124377723 | 124378242 | Fhl3          | ENSMUSG00000032643 | 37    | 0.14 | 0.19 | 0.11 | 0.15 | 0.07 | 0.13 |
| chr4 | 124613744 | 124614405 | Cdca8         | ENSMUSG00000028873 | -49   | 0.4  | 0.68 | 0.07 | 0.17 | 0.21 | 0.08 |
| chr4 | 134707990 | 134709017 | Runx3         | ENSMUSG00000070691 | 92    | 0.1  | 0.1  | 0.1  | 0.14 | 0.08 | 0.14 |
| chr4 | 150288357 | 150288842 | Park7         | ENSMUSG00000028964 | -53   | 0.17 | 0.09 | 0.07 | 0.17 | 0.1  | 0.11 |
| chr4 | 14791295  | 14791671  | Tmem55a       | ENSMUSG00000028221 | 260   | 0.17 | 0.17 | 0.12 | 0.12 | 0.08 | 0.09 |
| chr4 | 34497683  | 34498655  | Akirin2       | ENSMUSG00000028291 | -17   | 0.12 | 0.17 | 0.12 | 0.15 | 0.11 | 0.15 |
| chr4 | 126286851 | 126287386 | 5730409E04Rik | ENSMUSG00000073755 | 56    | 0.11 | 0.07 | 0.1  | 0.23 | 0.07 | 0.1  |
| chr4 | 132194742 | 132195263 | Eya3          | ENSMUSG00000028886 | 100   | 0.08 | 0.09 | 0.12 | 0.1  | 0.11 | 0.14 |
| chr4 | 135980382 | 135981059 | Htr1d         | ENSMUSG00000070687 | 193   | 0.07 | 0.18 | 0.11 | 0.1  | 0.09 | 0.11 |
| chr4 | 46356266  | 46358413  | Gm12446       | ENSMUSG00000087383 | -1036 | 0.11 | 0.1  | 0.11 | 0.14 | 0.1  | 0.14 |
| chr4 | 122563067 | 122563371 | Cap1          | ENSMUSG00000028656 | -116  | 0.16 | 0.21 | 0.2  | 0.16 | 0.13 | 0.21 |
| chr4 | 154334726 | 154335811 | Hes5          | ENSMUSG00000048001 | 236   | 0.09 | 0.16 | 0.08 | 0.16 | 0.07 | 0.11 |
| chr4 | 19935413  | 19935934  | Ttpa          | ENSMUSG00000073988 | 169   | 0.1  | 0.14 | 0.13 | 0.15 | 0.13 | 0.1  |
| chr4 | 21806747  | 21807275  | Coq3          | ENSMUSG00000028247 | 191   | 0.15 | 0.05 | 0.11 | 0.15 | 0.2  | 0.16 |
| chr4 | 56753537  | 56753812  | Actl7b        | ENSMUSG00000070980 | 623   | 0.94 | 0.95 | 0.94 | 0.96 | 0.96 | 0.96 |
| chr4 | 125879528 | 125880267 | Thrap3        | ENSMUSG00000043962 | -277  | 0.09 | 0.17 | 0.09 | 0.14 | 0.07 | 0.12 |
| chr4 | 126430204 | 126431356 | Ncdn          | ENSMUSG00000028833 | -127  | 0.11 | 0.11 | 0.1  | 0.13 | 0.08 | 0.16 |
| chr4 | 132439991 | 132440701 | Stx12         | ENSMUSG00000028879 | 78    | 0.19 | 0.1  | 0.13 | 0.16 | 0.15 | 0.16 |
| chr4 | 133074854 | 133075484 | 1810019J16Rik | ENSMUSG00000037600 | 291   | 0.13 | 0.19 | 0.13 | 0.11 | 0.26 | 0.1  |
| chr4 | 134989482 | 134990255 | Rcan3         | ENSMUSG00000059713 | -130  | 0.08 | 0.07 | 0.09 | 0.1  | 0.06 | 0.12 |
| chr4 | 43071726  | 43072387  | Unc13b        | ENSMUSG00000028456 | 231   | 0.14 | 0.14 | 0.08 | 0.16 | 0.17 | 0.15 |
| chr4 | 128639250 | 128639606 | Adc           | ENSMUSG00000028789 | 236   | 0.36 | 1    | 0.13 | 0.21 | 0.12 | 0.19 |
| chr4 | 128798188 | 128798889 | Hpca          | ENSMUSG00000028785 | -348  | 0.16 | 0.12 | 0.1  | 0.18 | 0.12 | 0.15 |
| chr4 | 151413344 | 151414134 | Nol9          | ENSMUSG00000028948 | 309   | 0.19 | 0.12 | 0.1  | 0.14 | 0.23 | 0.13 |
| chr4 | 155042902 | 155043615 | Mib2          | ENSMUSG00000029060 | 44    | 0.67 | 0.77 | 0.38 | 0.29 | 1    | NA   |
| chr4 | 11312491  | 11312842  | Esrp1         | ENSMUSG00000040728 | 875   | 1    | 0.3  | 0.3  | 0.25 | 0.43 | 0.33 |
| chr4 | 12067393  | 12068147  | Rbm12b        | ENSMUSG00000046667 | 359   | 0.16 | 0.6  | 0.09 | 0.25 | 0.09 | 0.1  |
| chr4 | 46463554  | 46465461  | Anp32b        | ENSMUSG00000028333 | 733   | 0.1  | 0.14 | 0.1  | 0.15 | 0.11 | 0.15 |
| chr4 | 109348893 | 109349770 | Faf1          | ENSMUSG00000010517 | 138   | 0.12 | 0.14 | 0.11 | 0.16 | 0.1  | 0.12 |
| chr4 | 123341197 | 123342316 | Macf1         | ENSMUSG00000028649 | 239   | 0.26 | 0.24 | 0.13 | 0.19 | 0.28 | 0.13 |

|      |           |           |               |                    |      |      |      |      |      |      |      |
|------|-----------|-----------|---------------|--------------------|------|------|------|------|------|------|------|
| chr4 | 130037124 | 130037668 | Zcchc17       | ENSMUSG00000028772 | -206 | 0.11 | 0.07 | 0.08 | 0.1  | 0.08 | 0.15 |
| chr4 | 138748337 | 138749113 | Capzb         | ENSMUSG00000028745 | -89  | 0.2  | 0.23 | 0.1  | 0.22 | 0.16 | 0.16 |
| chr4 | 140803742 | 140804007 | Arhgef19      | ENSMUSG00000028919 | 1563 | 0.1  | 0.1  | 0.11 | 0.18 | 0.08 | 0.16 |
| chr4 | 21703331  | 21703859  | Usp45         | ENSMUSG00000040455 | 187  | 0.12 | 0.22 | 0.15 | 0.23 | 0.08 | 0.17 |
| chr4 | 35172602  | 35173069  | 3110043O21Rik | ENSMUSG00000028300 | 248  | 0.22 | 0.21 | 0.12 | 0.12 | 0.17 | 0.13 |
| chr4 | 62244421  | 62244719  | Rgs3          | ENSMUSG00000059810 | -65  | 0.46 | 0.39 | 0.18 | 0.17 | 0.34 | 0.16 |
| chr4 | 133637744 | 133638058 | Aim1l         | ENSMUSG00000012123 | -326 | 0.1  | 0.12 | 0.08 | 0.22 | 0.17 | 0.13 |
| chr4 | 134486750 | 134487384 | Syf2          | ENSMUSG00000028821 | 254  | 0.1  | 0.1  | 0.12 | 0.19 | 0.07 | 0.18 |
| chr4 | 10801438  | 10802216  | 2610301B20Rik | ENSMUSG00000059482 | 182  | 0.12 | 0.1  | 0.08 | 0.12 | 0.11 | 0.12 |
| chr4 | 102887039 | 102888025 | Slc35d1       | ENSMUSG00000028521 | -255 | 0.12 | 0.12 | 0.07 | 0.12 | 0.11 | 0.11 |
| chr4 | 126644780 | 126645521 | Zmym4         | ENSMUSG00000042446 | -7   | 0.17 | 0.21 | 0.12 | 0.14 | 0.14 | 0.11 |
| chr4 | 134479331 | 134480323 | D4Wsu53e      | ENSMUSG00000037266 | 320  | 0.17 | 0.14 | 0.08 | 0.15 | 0.15 | 0.14 |
| chr4 | 43574929  | 43575656  | Tln1          | ENSMUSG00000028465 | -263 | 0.18 | 0.08 | 0.12 | 0.17 | 0.14 | 0.13 |
| chr4 | 135412772 | 135412992 | Srsf10        | ENSMUSG00000028676 | 835  | 0.1  | 0.2  | 0.11 | 0.17 | 0.14 | 0.17 |
| chr4 | 135577060 | 135577880 | Tceb3         | ENSMUSG00000028668 | 208  | 0.14 | 0.23 | 0.1  | 0.14 | 0.11 | 0.14 |
| chr4 | 59201939  | 59202815  | Ugcg          | ENSMUSG00000028381 | 248  | 0.19 | 0.09 | 0.12 | 0.15 | 0.16 | 0.11 |
| chr4 | 114597626 | 114598695 | Foxe3         | ENSMUSG00000044518 | 497  | 0.16 | 0.17 | 0.12 | 0.17 | 0.14 | 0.19 |
| chr4 | 115511638 | 115512030 | Mknk1         | ENSMUSG00000028708 | 31   | 0.2  | 0.37 | 0.14 | 0.17 | 0.29 | 0.27 |
| chr4 | 132796893 | 132797416 | Map3k6        | ENSMUSG00000028862 | 421  | 0.1  | 0.09 | 0.09 | 0.14 | 0.13 | 0.19 |
| chr4 | 134066851 | 134067211 | 2610002D18Rik | ENSMUSG00000078521 | 117  | 0.09 | 0.07 | 0.09 | 0.16 | 0.05 | 0.13 |
| chr4 | 151401465 | 151401943 | Zbtb48        | ENSMUSG00000028952 | 42   | 0.11 | 0.15 | 0.12 | 0.16 | 0.18 | 0.12 |
| chr4 | 8617150   | 8619384   | Chd7          | ENSMUSG00000041235 | 714  | 0.19 | 0.17 | 0.11 | 0.15 | 0.18 | 0.13 |
| chr4 | 107475094 | 107476298 | Lrp8          | ENSMUSG00000028613 | 249  | 0.18 | 0.13 | 0.12 | 0.12 | 0.14 | 0.18 |
| chr4 | 129219541 | 129220196 | Hdac1         | ENSMUSG00000028800 | 67   | 0.18 | 0.33 | 0.2  | 0.23 | 0.15 | 0.29 |
| chr4 | 129488082 | 129488314 | Ptp4a2        | ENSMUSG00000028788 | -265 | 0.1  | 0.18 | 0.1  | 0.19 | 0.15 | 0.16 |
| chr4 | 147504671 | 147505403 | 2610109H07Rik | ENSMUSG00000029005 | -230 | 0.33 | 0.6  | 0.14 | 0.18 | 0.44 | 0.21 |
| chr4 | 33070021  | 33070983  | Rragd         | ENSMUSG00000028278 | 372  | 0.17 | 0.28 | 0.11 | 0.19 | 0.2  | 0.1  |
| chr4 | 116493558 | 116494143 | Hpd1          | ENSMUSG00000043155 | 263  | 0.09 | 0.05 | 0.09 | 0.1  | 0.12 | 0.11 |
| chr4 | 123019546 | 123020333 | Bmp8a         | ENSMUSG00000032726 | 107  | 0.14 | 0.31 | 0.1  | 0.22 | 0.21 | 0.21 |
| chr4 | 129138579 | 129139162 | Bsdc1         | ENSMUSG00000040859 | 45   | 0.08 | 0.08 | 0.11 | 0.12 | 0.05 | 0.12 |

|      |           |           |               |                    |      |      |      |      |      |      |      |
|------|-----------|-----------|---------------|--------------------|------|------|------|------|------|------|------|
| chr4 | 137881665 | 137882272 | Pink1         | ENSMUSG00000028756 | 187  | 0.11 | 0.11 | 0.1  | 0.15 | 0.08 | 0.13 |
| chr4 | 139130130 | 139131646 | Iffo2         | ENSMUSG00000041025 | 253  | 0.13 | 0.19 | 0.1  | 0.16 | 0.11 | 0.15 |
| chr4 | 20705148  | 20705752  | Nkain3        | ENSMUSG00000055761 | 264  | 0.11 | 0.15 | 0.09 | 0.14 | 0.07 | 0.09 |
| chr4 | 124559565 | 124560018 | Epha10        | ENSMUSG00000028876 | 1648 | 0.13 | 0.07 | 0.08 | 0.17 | 0.08 | 0.14 |
| chr4 | 154975363 | 154976352 | Slc35e2       | ENSMUSG00000042202 | 332  | 0.19 | 0.2  | 0.12 | 0.15 | 0.14 | 0.15 |
| chr4 | 106739117 | 106740052 | Mrpl37        | ENSMUSG00000028622 | -159 | 0.09 | 0.19 | 0.12 | 0.12 | 0.06 | 0.18 |
| chr4 | 153673811 | 153674345 | Arhgef16      | ENSMUSG00000029032 | -77  | 0.1  | 0.11 | 0.11 | 0.08 | 0.08 | 0.12 |
| chr4 | 108672935 | 108673683 | Nrd1          | ENSMUSG00000053510 | 49   | 0.14 | 0.27 | 0.14 | 0.25 | 0.16 | 0.23 |
| chr4 | 124558704 | 124559218 | Epha10        | ENSMUSG00000028876 | 818  | 0.19 | 0.14 | 0.07 | 0.23 | 0.12 | 0.07 |
| chr4 | 127665890 | 127666400 | Csmd2         | ENSMUSG00000028804 | 857  | 0.29 | 0.35 | 0.29 | 1    | 0.13 | 0.18 |
| chr4 | 130125496 | 130126122 | Nkain1        | ENSMUSG00000078532 | 104  | 0.16 | 0.17 | 0.09 | 0.16 | 0.14 | 0.16 |
| chr4 | 134828098 | 134829143 | Clic4         | ENSMUSG00000037242 | 109  | 0.14 | 0.05 | 0.13 | 0.14 | 0.16 | 0.15 |
| chr4 | 151671052 | 151671693 | Icmt          | ENSMUSG00000039662 | 36   | 0.08 | 0.12 | 0.1  | 0.15 | 0.09 | 0.1  |
| chr4 | 24893531  | 24894056  | Gpr63         | ENSMUSG00000040372 | 239  | 0.11 | 0.08 | 0.08 | 0.16 | 0.09 | 0.14 |
| chr4 | 34634269  | 34634725  | Slc35a1       | ENSMUSG00000028293 | 7    | 0.5  | 0.09 | 0.13 | 0.18 | 0.12 | 0.19 |
| chr4 | 95633707  | 95634401  | 9530080O11Rik | ENSMUSG00000044125 | -328 | 0.2  | 0.13 | 0.1  | 0.23 | 0.1  | 0.16 |
| chr4 | 40917659  | 40918542  | Nfx1          | ENSMUSG00000028423 | 161  | 0.09 | 0.15 | 0.1  | 0.13 | 0.11 | 0.12 |
| chr4 | 43591176  | 43592069  | Gba2          | ENSMUSG00000028467 | -213 | 0.14 | 0.22 | 0.12 | 0.14 | 0.11 | 0.13 |
| chr4 | 43970230  | 43970884  | Glpr2         | ENSMUSG00000028480 | 284  | 0.17 | 0.2  | 0.12 | 0.14 | 0.24 | 0.27 |
| chr4 | 59561367  | 59562701  | Rod1          | ENSMUSG00000028382 | -425 | 0.19 | 0.15 | 0.13 | 0.15 | 0.17 | 0.17 |
| chr4 | 59638781  | 59639729  | E130308A19Rik | ENSMUSG00000045071 | 172  | 0.15 | 0.2  | 0.11 | 0.15 | 0.13 | 0.11 |
| chr4 | 137990437 | 137990917 | Mul1          | ENSMUSG00000041241 | 91   | 0.09 | 0.17 | 0.09 | 0.13 | 0.11 | 0.13 |
| chr4 | 17780478  | 17780706  | Mmp16         | ENSMUSG00000028226 | -13  | 0.12 | 0.22 | 0.09 | 0.18 | 0.29 | 0.14 |
| chr4 | 101091743 | 101093131 | Ak4           | ENSMUSG00000028527 | 555  | 0.12 | 0.13 | 0.09 | 0.13 | 0.1  | 0.11 |
| chr4 | 131977918 | 131978653 | Phactr4       | ENSMUSG00000066043 | 71   | 0.08 | 0.24 | 0.09 | 0.19 | 0.17 | 0.19 |
| chr4 | 132833392 | 132833880 | Tmem222       | ENSMUSG00000028857 | -103 | 0.24 | 0.31 | 0.12 | 0.24 | 0.3  | 0.23 |
| chr4 | 151647980 | 151648627 | Gpr153        | ENSMUSG00000042804 | -38  | 0.18 | 0.21 | 0.1  | 0.12 | 0.16 | 0.15 |
| chr4 | 154229759 | 154230573 | Ttc34         | ENSMUSG00000046637 | -143 | 0.24 | 0.12 | 0.14 | 0.16 | 0.3  | 0.19 |
| chr4 | 63219475  | 63220029  | 6330416G13Rik | ENSMUSG00000045917 | -63  | 0.11 | 0.09 | 0.08 | 0.09 | 0.09 | 0.09 |
| chr4 | 119193681 | 119193923 | Gm12957       | ENSMUSG00000084379 | 207  | 0.89 | 0.86 | 0.83 | 0.92 | 0.83 | 0.92 |

|      |           |           |               |                    |      |      |      |      |      |      |      |
|------|-----------|-----------|---------------|--------------------|------|------|------|------|------|------|------|
| chr4 | 126145647 | 126146092 | Eif2c1        | ENSMUSG00000041530 | -42  | 0.23 | 0.19 | 0.15 | 0.08 | 0.16 | 0.23 |
| chr4 | 131859017 | 131859245 | Rab42-ps      | ENSMUSG00000089687 | 169  | 0.35 | NA   | 0.08 | 0.07 | 0.27 | 0.11 |
| chr4 | 132091414 | 132091874 | Dnajc8        | ENSMUSG00000054405 | 179  | 0.16 | 0.16 | 0.12 | 0.13 | 0.14 | 0.1  |
| chr4 | 133101574 | 133102081 | Nudc          | ENSMUSG00000028851 | 84   | 0.07 | 0.13 | 0.17 | 0.25 | 0.11 | 0.25 |
| chr4 | 133898926 | 133899406 | Slc30a2       | ENSMUSG00000028836 | 70   | 0.12 | 0.07 | 0.09 | 0.18 | 0.1  | 0.12 |
| chr4 | 147965283 | 147966169 | Srm           | ENSMUSG00000006442 | 114  | 0.15 | 0.1  | 0.1  | 0.13 | 0.16 | 0.19 |
| chr4 | 6380680   | 6381510   | Nsmf          | ENSMUSG00000028245 | -369 | 0.14 | 0.16 | 0.09 | 0.1  | 0.11 | 0.13 |
| chr4 | 10934193  | 10935377  | Plekhf2       | ENSMUSG00000049969 | 38   | 0.14 | 0.11 | 0.08 | 0.15 | 0.1  | 0.13 |
| chr4 | 11412872  | 11413475  | 1110037F02Rik | ENSMUSG00000040720 | 68   | 0.21 | 0.16 | 0.08 | 0.2  | 0.14 | 0.11 |
| chr4 | 47486801  | 47487269  | Alg2          | ENSMUSG00000039740 | -186 | 0.29 | NA   | 0.12 | NA   | 0.14 | 0.16 |
| chr4 | 53024675  | 53025203  | Nipsnap3b     | ENSMUSG00000015247 | 187  | 0.07 | 0.1  | 0.09 | 0.09 | 0.06 | 0.18 |
| chr4 | 130218992 | 130219911 | Pum1          | ENSMUSG00000028580 | 215  | 0.21 | 0.13 | 0.16 | 0.19 | 0.24 | 0.15 |
| chr4 | 137548879 | 137549644 | Eif4g3        | ENSMUSG00000028760 | 324  | 0.24 | 0.31 | 0.12 | 0.17 | 0.2  | 0.19 |
| chr4 | 32702142  | 32702751  | Casp8ap2      | ENSMUSG00000028282 | 20   | 0.33 | 1    | 0.16 | 0.23 | 0.09 | 0.11 |
| chr4 | 47104783  | 47105305  | Galnt12       | ENSMUSG00000039774 | 249  | 0.18 | 0.59 | 0.15 | 0.22 | 0.21 | 0.2  |
| chr4 | 49533902  | 49534151  | Mrpl50        | ENSMUSG00000044018 | -61  | 0.5  | 1    | 0.11 | 0.22 | 0.14 | 0.16 |
| chr4 | 98589503  | 98591235  | Usp1          | ENSMUSG00000028560 | -132 | 0.16 | 0.11 | 0.13 | 0.11 | 0.15 | 0.11 |
| chr4 | 135429426 | 135430052 | Pnrc2         | ENSMUSG00000028675 | -254 | 1    | 0.26 | 0.18 | 0.27 | 0.31 | 0.26 |
| chr4 | 46662596  | 46663582  | Tbc1d2        | ENSMUSG00000039813 | -8   | 0.19 | 0.32 | 0.17 | 0.2  | 0.24 | 0.14 |
| chr4 | 59015749  | 59016445  | Dnajc25       | ENSMUSG00000070972 | 53   | 0.45 | 0.09 | 0.18 | 0.21 | 0.37 | 0.35 |
| chr4 | 111392536 | 111392914 | Spata6        | ENSMUSG00000034401 | 136  | 0.15 | 0.18 | 0.11 | 0.28 | 0.1  | 0.18 |
| chr4 | 155144211 | 155144900 | Gm17585       | ENSMUSG00000090418 | 477  | 0.1  | 0.15 | 0.15 | 0.17 | 0.12 | 0.16 |
| chr4 | 134908291 | 134909622 | Srrm1         | ENSMUSG00000028809 | 93   | 0.16 | 0.16 | 0.12 | 0.16 | 0.17 | 0.15 |
| chr4 | 151656968 | 151657729 | Gpr153        | ENSMUSG00000042804 | 869  | 0.09 | 0.11 | 0.13 | 0.2  | 0.1  | 0.16 |
| chr4 | 11083285  | 11083909  | Trp53inp1     | ENSMUSG00000028211 | 19   | 0.1  | 0.22 | 0.1  | 0.19 | 0.08 | 0.13 |
| chr4 | 25208652  | 25209075  | 1810074P20Rik | ENSMUSG00000040359 | 32   | 0.23 | 0.14 | 0.12 | 0.21 | 0.15 | 0.19 |
| chr4 | 48597742  | 48598796  | Tmeff1        | ENSMUSG00000028347 | 223  | 0.15 | 0.14 | 0.07 | 0.13 | 0.13 | 0.11 |
| chr4 | 116393360 | 116393914 | Tesk2         | ENSMUSG00000033985 | 84   | 0.09 | 0.05 | 0.14 | 0.14 | 0.12 | 0.11 |
| chr4 | 117507944 | 117509338 | Slc6a9        | ENSMUSG00000028542 | 639  | 0.09 | 0.07 | 0.12 | 0.12 | 0.1  | 0.11 |
| chr4 | 129724792 | 129725159 | Gm12963       | ENSMUSG00000085517 | 43   | 0.5  | 0.38 | 0.14 | 0.14 | 0.1  | 0.18 |

|      |           |           |               |                    |       |      |      |      |      |      |      |
|------|-----------|-----------|---------------|--------------------|-------|------|------|------|------|------|------|
| chr4 | 133130619 | 133131155 | Gpatch3       | ENSMUSG00000028850 | 227   | 0.2  | 0.44 | 0.16 | 0.19 | 0.24 | 0.18 |
| chr4 | 126354796 | 126355142 | Psmb2         | ENSMUSG00000028837 | 95    | 0.17 | 0.06 | 0.12 | 0.18 | 0.12 | 0.23 |
| chr4 | 148478171 | 148478525 | Dffa          | ENSMUSG00000028974 | 93    | 0.15 | 0.42 | 0.11 | 0.08 | 0.1  | 0.14 |
| chr4 | 94645394  | 94646080  | Mysm1         | ENSMUSG00000062627 | -4    | 0.17 | 0.11 | 0.12 | 0.16 | 0.13 | 0.09 |
| chr4 | 122860552 | 122860911 | Hpcal4        | ENSMUSG00000046093 | -11   | 0.25 | 0.27 | 0.12 | 0.11 | 0.07 | 0.11 |
| chr4 | 131885253 | 131885745 | Trnau1ap      | ENSMUSG00000028898 | -195  | 0.15 | 0.11 | 0.13 | 0.11 | 0.11 | 0.17 |
| chr4 | 70195285  | 70196442  | Megf9         | ENSMUSG00000039270 | 99    | 0.1  | 0.13 | 0.12 | 0.13 | 0.09 | 0.14 |
| chr4 | 125724159 | 125724454 | Mrps15        | ENSMUSG00000028861 | 137   | 0.2  | 0.09 | 0.09 | 0.13 | 0.11 | 0.08 |
| chr4 | 132768262 | 132768666 | Gpr3          | ENSMUSG00000049649 | -13   | 0.28 | 0.37 | 0.17 | 0.48 | 0.23 | 0.21 |
| chr4 | 137818046 | 137818691 | Kif17         | ENSMUSG00000028758 | 221   | 0.1  | 0.17 | 0.11 | 0.12 | 0.07 | 0.14 |
| chr4 | 138469337 | 138469939 | Otud3         | ENSMUSG00000041161 | 222   | 0.1  | 0.08 | 0.09 | 0.11 | 0.09 | 0.09 |
| chr4 | 154416893 | 154417598 | Plch2         | ENSMUSG00000029055 | 18    | 0.12 | NA   | 0.18 | 0.24 | 0.21 | 0.22 |
| chr4 | 85160090  | 85160442  | Gm12680       | ENSMUSG00000087349 | 35    | 0.25 | 0.5  | 0.06 | 0.16 | 0.14 | 0.14 |
| chr4 | 102432674 | 102432926 | Sgip1         | ENSMUSG00000028524 | 60    | 0.2  | 0.16 | 0.25 | 0.14 | 0.09 | 0.12 |
| chr4 | 142801777 | 142802817 | Prdm2         | ENSMUSG00000057637 | 311   | 0.21 | 0.35 | 0.12 | 0.16 | 0.19 | 0.16 |
| chr4 | 150418418 | 150419168 | Per3          | ENSMUSG00000028957 | -19   | 0.26 | 0.49 | 0.12 | 0.19 | 0.22 | 0.11 |
| chr4 | 155186265 | 155187145 | Ccnl2         | ENSMUSG00000029068 | 107   | 0.12 | 0.17 | 0.09 | 0.14 | 0.14 | 0.16 |
| chr4 | 46548709  | 46548948  | Gm16731       | ENSMUSG00000085990 | 55    | 0.11 | 0.14 | 0.09 | 0.19 | 0.08 | 0.11 |
| chr4 | 114515785 | 114516327 | U1            | ENSMUSG00000087923 | 1666  | 0.2  | 0.11 | 0.06 | 0.17 | 0.16 | 0.17 |
| chr4 | 155317884 | 155318586 | Ube2j2        | ENSMUSG00000023286 | 295   | 0.09 | 0.19 | 0.12 | 0.18 | 0.12 | 0.13 |
| chr4 | 116782000 | 116782216 | Ptch2         | ENSMUSG00000028681 | -732  | 1    | 0.88 | 0.51 | 0.63 | 0.8  | 0.86 |
| chr4 | 129277570 | 129278431 | Eif3i         | ENSMUSG00000028798 | -157  | 0.42 | 0.59 | 0.24 | 0.23 | 0.48 | 0.15 |
| chr4 | 43512372  | 43512725  | E130306D19Rik | ENSMUSG00000051517 | -68   | 0.06 | 0.33 | 0.12 | 0.11 | 0.13 | 0.15 |
| chr4 | 40215324  | 40215733  | 2010003O02Rik | ENSMUSG00000028407 | -1074 | 0.11 | 0.17 | 0.08 | 0.14 | 0.2  | 0.14 |
| chr4 | 52451770  | 52452322  | 2700081L22Rik | ENSMUSG00000085763 | -209  | 0.14 | 0.43 | 0.14 | 0.35 | 0.1  | 0.17 |
| chr4 | 83171042  | 83171527  | 4930473A06Rik | ENSMUSG00000052407 | -165  | 0.25 | 0.24 | 0.1  | 0.18 | 0.09 | 0.13 |
| chr4 | 118867890 | 118868239 | Ccdc23        | ENSMUSG00000028643 | 153   | 0.13 | 0.1  | 0.09 | 0.17 | 0.07 | 0.13 |
| chr4 | 45354861  | 45355669  | Dcaf10        | ENSMUSG00000035572 | 292   | 0.11 | 0.14 | 0.11 | 0.15 | 0.1  | 0.11 |
| chr4 | 46208715  | 46209271  | Xpa           | ENSMUSG00000028329 | 183   | 0.19 | 0.18 | 0.09 | 0.14 | 0.13 | 0.1  |
| chr4 | 48137720  | 48138212  | Stx17         | ENSMUSG00000061455 | 179   | 0.1  | 0.13 | 0.11 | 0.15 | 0.14 | 0.1  |

|      |           |           |               |                    |      |      |      |      |      |      |      |
|------|-----------|-----------|---------------|--------------------|------|------|------|------|------|------|------|
| chr4 | 40650085  | 40650404  | Aptx          | ENSMUSG00000028411 | -49  | 0.25 | 0.09 | 0.11 | 0.19 | 0.09 | 0.12 |
| chr4 | 154623902 | 154624395 | 2610002J02Rik | ENSMUSG00000073684 | 237  | 1    | 0.37 | 0.17 | 0.85 | 0.65 | 0.58 |
| chr4 | 33117803  | 33118934  | 4933421O10Rik | ENSMUSG00000085037 | -70  | 0.14 | 0.13 | 0.08 | 0.12 | 0.15 | 0.12 |
| chr4 | 108551625 | 108551991 | Rab3b         | ENSMUSG00000003411 | 140  | 0.11 | 0.08 | 0.09 | 0.24 | 0.06 | 0.18 |
| chr4 | 151851448 | 151852443 | Kcnab2        | ENSMUSG00000028931 | -403 | 0.12 | 0.13 | 0.1  | 0.19 | 0.11 | 0.13 |
| chr4 | 19635718  | 19636443  | Wwp1          | ENSMUSG00000041058 | 60   | 0.12 | 0.1  | 0.1  | 0.16 | 0.13 | 0.18 |
| chr4 | 41045061  | 41045339  | Aqp3          | ENSMUSG00000028435 | 16   | 0.1  | 0.08 | 0.07 | 0.13 | 0.08 | 0.15 |
| chr4 | 148274433 | 148275874 | Casz1         | ENSMUSG00000028977 | -105 | 0.09 | 0.11 | 0.13 | 0.14 | 0.1  | 0.17 |
| chr4 | 44180242  | 44181373  | Rnf38         | ENSMUSG00000035696 | -443 | 0.1  | 0.17 | 0.16 | 0.17 | 0.09 | 0.17 |
| chr4 | 155027066 | 155027573 | Mmp23         | ENSMUSG00000029061 | -3   | 0.18 | 0.18 | 0.08 | 0.26 | 0.13 | 0.14 |
| chr4 | 21654702  | 21654985  | Ccnc          | ENSMUSG00000028252 | -5   | 0.1  | 0.28 | 0.2  | 0.18 | 0.18 | 0.25 |
| chr4 | 63205805  | 63206399  | Atp6v1g1      | ENSMUSG00000039105 | 296  | 0.09 | 0.09 | 0.07 | 0.09 | 0.07 | 0.23 |
| chr4 | 87740400  | 87740973  | BC057079      | ENSMUSG00000038368 | 153  | 0.22 | 0.26 | 0.09 | 0.12 | 0.13 | 0.24 |
| chr4 | 99382042  | 99382582  | Alg6          | ENSMUSG00000073792 | -43  | 0.12 | 0.22 | 0.17 | 0.14 | 0.15 | 0.13 |
| chr4 | 126698555 | 126699748 | Sfpq          | ENSMUSG00000028820 | 583  | 0.21 | 0.3  | 0.11 | 0.13 | 0.19 | 0.13 |
| chr4 | 129296137 | 129296461 | Iqcc          | ENSMUSG00000040795 | 21   | 0.24 | 0.08 | 0.11 | 0.11 | 0.19 | 0.09 |
| chr4 | 147525695 | 147526093 | Fbxo6         | ENSMUSG00000055401 | -139 | 0.07 | 0.08 | 0.1  | 0.13 | 0.09 | 0.14 |
| chr4 | 61947325  | 61947753  | Slc31a2       | ENSMUSG00000066152 | 56   | 0.1  | 0.34 | 0.11 | 0.11 | 0.09 | 0.11 |
| chr4 | 147442408 | 147442631 | Gm13202       | ENSMUSG00000081726 | 82   | 0.27 | 1    | 0.37 | 0.41 | 0.32 | 0.56 |
| chr4 | 24423348  | 24424027  | Mms22l        | ENSMUSG00000045751 | 89   | 0.13 | 0.1  | 0.09 | 0.2  | 0.14 | 0.11 |
| chr4 | 34829575  | 34830399  | Zfp292        | ENSMUSG00000039967 | 192  | 0.16 | 0.19 | 0.09 | 0.13 | 0.18 | 0.12 |
| chr4 | 43888223  | 43888738  | Reck          | ENSMUSG00000028476 | 78   | 0.14 | 0.13 | 0.12 | 0.15 | 0.15 | 0.12 |
| chr4 | 141092176 | 141094777 | Spn           | ENSMUSG00000040761 | 692  | 0.12 | 0.13 | 0.12 | 0.15 | 0.13 | 0.15 |
| chr4 | 155483940 | 155484493 | 9430015G10Rik | ENSMUSG00000059939 | 125  | 0.25 | 1    | 0.26 | NA   | 0.5  | 0.34 |
| chr4 | 91041338  | 91041814  | Elavl2        | ENSMUSG00000008489 | 1422 | 0.24 | 0.24 | 0.14 | 0.29 | 0.19 | 0.2  |
| chr4 | 115689872 | 115690595 | Faah          | ENSMUSG00000034171 | 47   | 0.2  | 0.13 | 0.14 | 0.17 | 0.19 | 0.13 |
| chr4 | 116961592 | 116962077 | Rnf220        | ENSMUSG00000028677 | -118 | 0.12 | 0.14 | 0.1  | 0.13 | 0.12 | 0.13 |
| chr4 | 120712214 | 120712421 | Col9a2        | ENSMUSG00000028626 | -36  | 0.25 | 0.05 | 0.34 | 0.5  | 0.1  | 0.16 |
| chr4 | 153544864 | 153545307 | Megf6         | ENSMUSG00000057751 | 246  | 0.38 | NA   | 0.12 | 0.21 | 1    | 0.11 |
| chr4 | 6292677   | 6293084   | Sdcbp         | ENSMUSG00000028249 | 83   | 0.14 | 0.4  | 0.15 | 0.12 | 0.19 | 0.13 |

|      |           |           |               |                    |       |      |      |      |      |      |      |
|------|-----------|-----------|---------------|--------------------|-------|------|------|------|------|------|------|
| chr4 | 48060061  | 48060449  | Nr4a3         | ENSMUSG00000028341 | -1731 | 0.25 | 0.13 | 0.11 | 0.17 | 0.11 | 0.16 |
| chr4 | 57002922  | 57003172  | 6430704M03Rik | ENSMUSG00000045589 | -39   | 0.05 | 0.1  | 0.06 | 0.08 | 0.08 | 0.26 |
| chr4 | 73436458  | 73437046  | Rasef         | ENSMUSG00000043003 | -246  | 0.1  | 0.07 | 0.12 | 0.18 | 0.11 | 0.15 |
| chr4 | 107552264 | 107552735 | Magoh         | ENSMUSG00000028609 | 139   | 0.5  | 0.33 | 0.2  | 0.24 | 0.14 | 0.07 |
| chr4 | 135129212 | 135129516 | Grhl3         | ENSMUSG00000037188 | 181   | 0.33 | 0.12 | 0.1  | 0.15 | 0.14 | 0.12 |
| chr4 | 141000510 | 141001239 | Zbtb17        | ENSMUSG00000006215 | 305   | 0.13 | 0.09 | 0.09 | 0.15 | 0.14 | 0.13 |
| chr4 | 147278574 | 147279097 | Mfn2          | ENSMUSG00000029020 | -68   | 0.28 | 0.31 | 0.09 | 0.14 | 0.26 | 0.14 |
| chr4 | 3501731   | 3502289   | Tmem68        | ENSMUSG00000028232 | -59   | 0.14 | 0.13 | 0.11 | 0.21 | 0.14 | 0.15 |
| chr4 | 107973388 | 107973689 | Zyg11b        | ENSMUSG00000034636 | 157   | 0.08 | 0.07 | 0.07 | 0.16 | 0.09 | 0.14 |
| chr4 | 124707119 | 124707519 | Gnl2          | ENSMUSG00000028869 | 83    | 0.09 | 0.11 | 0.12 | 0.21 | 0.08 | 0.15 |
| chr4 | 131901008 | 131901715 | Rcc1          | ENSMUSG00000028896 | -89   | 0.23 | 0.24 | 0.08 | 0.19 | 0.25 | 0.14 |
| chr4 | 134470594 | 134471001 | Tmem50a       | ENSMUSG00000028822 | 133   | 0.12 | 0.12 | 0.12 | 0.13 | 0.1  | 0.15 |
| chr4 | 11486013  | 11486331  | Rad54b        | ENSMUSG00000078773 | 76    | 0.09 | 0.12 | 0.07 | 0.12 | 0.06 | 0.12 |
| chr4 | 149328260 | 149329194 | Spsb1         | ENSMUSG00000039911 | 413   | 0.12 | 0.07 | 0.09 | 0.18 | 0.11 | 0.1  |
| chr4 | 153385793 | 153386625 | Lrrc47        | ENSMUSG00000029028 | 369   | 0.1  | 0.2  | 0.12 | 0.11 | 0.1  | 0.11 |
| chr4 | 41720026  | 41720672  | Ccl27a        | ENSMUSG00000073888 | 61    | 0.3  | 0.09 | 0.09 | 0.7  | 0.39 | 0.18 |
| chr4 | 58218714  | 58219371  | Svep1         | ENSMUSG00000028369 | 426   | 0.19 | 0.11 | 0.09 | 0.12 | 0.16 | 0.1  |
| chr4 | 108078897 | 108079417 | Gpx7          | ENSMUSG00000028597 | 158   | 0.2  | NA   | 0.15 | 0.39 | 0.15 | 0.1  |
| chr4 | 153516344 | 153516665 | Wdr8          | ENSMUSG00000029029 | 23    | 0.09 | 0.19 | 0.07 | 0.14 | 0.06 | 0.1  |
| chr4 | 155243395 | 155244162 | Gltpd1        | ENSMUSG00000029073 | -307  | 0.2  | 0.1  | 0.09 | 0.19 | 0.14 | 0.11 |
| chr4 | 83131562  | 83132721  | Psip1         | ENSMUSG00000028484 | -59   | 0.1  | 0.07 | 0.11 | 0.11 | 0.11 | 0.11 |
| chr4 | 114078905 | 114079531 | Gm12824       | ENSMUSG00000070867 | -111  | 0.1  | 0.24 | 0.12 | 0.16 | 0.11 | 0.15 |
| chr4 | 144836303 | 144836724 | Tnfrsf1b      | ENSMUSG00000028599 | 260   | 0.31 | 0.19 | 0.16 | 0.19 | 0.26 | 0.28 |
| chr4 | 62021235  | 62021820  | Fkbp15        | ENSMUSG00000066151 | -24   | 0.38 | 0.17 | 0.15 | 0.15 | 0.46 | 0.15 |
| chr4 | 62141019  | 62141507  | Bspry         | ENSMUSG00000028392 | 178   | 0.1  | 0.09 | 0.12 | 0.13 | 0.1  | 0.18 |
| chr4 | 124762247 | 124762963 | Meaf6         | ENSMUSG00000028863 | 227   | 0.07 | 0.07 | 0.07 | 0.15 | 0.08 | 0.14 |
| chr4 | 148265087 | 148265611 | Casz1         | ENSMUSG00000028977 | 1859  | 0.24 | 0.34 | 0.14 | 0.18 | 0.25 | 0.26 |
| chr4 | 129190759 | 129191806 | Marcks1       | ENSMUSG00000047945 | 457   | 0.29 | 0.32 | 0.17 | 0.17 | 0.24 | 0.15 |
| chr4 | 57446759  | 57447600  | Palm2         | ENSMUSG00000090053 | 60    | 0.08 | 0.29 | 0.12 | 0.12 | 0.11 | 0.17 |
| chr4 | 108251843 | 108252416 | Prpf38a       | ENSMUSG00000063800 | -188  | 0.22 | 0.17 | 0.11 | 0.14 | 0.23 | 0.16 |

|      |           |           |               |                    |      |      |      |      |      |      |      |
|------|-----------|-----------|---------------|--------------------|------|------|------|------|------|------|------|
| chr4 | 129168423 | 129169126 | 1700125D06Rik | ENSMUSG00000078554 | 340  | 0.14 | 0.19 | 0.16 | 0.18 | 0.14 | 0.2  |
| chr4 | 137263263 | 137263567 | Rap1gap       | ENSMUSG00000041351 | -22  | 0.17 | 0.07 | 0.11 | 0.09 | 0.08 | 0.13 |
| chr4 | 137351781 | 137352398 | Alpl          | ENSMUSG00000028766 | 56   | 0.14 | 0.21 | 0.09 | 0.13 | 0.1  | 0.17 |
| chr4 | 8165955   | 8166258   | Car8          | ENSMUSG00000041261 | 82   | 0.11 | 0.38 | 0.07 | 0.19 | 0.08 | 0.15 |
| chr4 | 8462617   | 8463472   | Rab2a         | ENSMUSG00000047187 | 253  | 0.26 | 0.25 | 0.13 | 0.25 | 0.25 | 0.12 |
| chr4 | 12833985  | 12834385  | Gm11818       | ENSMUSG00000055963 | 200  | 0.33 | NA   | 0.08 | 0.19 | 0.27 | 0.21 |
| chr4 | 21858216  | 21858750  | 6230409E13Rik | ENSMUSG00000028246 | 7    | 0.19 | 0.19 | 0.12 | 0.17 | 0.18 | 0.2  |
| chr4 | 22284688  | 22285092  | Fbxl4         | ENSMUSG00000040410 | 200  | 0.18 | 0.17 | 0.09 | 0.13 | 0.17 | 0.17 |
| chr4 | 23446262  | 23446481  | Gm11889       | ENSMUSG00000082876 | -784 | 0.93 | 0.97 | 0.92 | 0.88 | 0.92 | 0.92 |
| chr4 | 25726735  | 25726961  | Fut9          | ENSMUSG00000055373 | 154  | 0.11 | 0.12 | 0.16 | 0.09 | 0.13 | 0.14 |
| chr4 | 26273556  | 26274136  | Manea         | ENSMUSG00000040520 | 155  | 0.24 | 0.12 | 0.08 | 0.15 | 0.23 | 0.1  |
| chr4 | 32050361  | 32051413  | Map3k7        | ENSMUSG00000028284 | -185 | 0.15 | 0.16 | 0.17 | 0.18 | 0.15 | 0.19 |
| chr4 | 33334457  | 33335721  | Pnrc1         | ENSMUSG00000040128 | -539 | 0.15 | 0.28 | 0.1  | 0.18 | 0.16 | 0.14 |
| chr4 | 35104287  | 35104747  | Mob3b         | ENSMUSG00000073910 | 216  | 0.12 | 0.37 | 0.22 | 0.28 | 0.07 | 0.28 |
| chr4 | 36897351  | 36897680  | Lingo2        | ENSMUSG00000045083 | -15  | 0.13 | 0.16 | 0.09 | 0.16 | 0.13 | 0.12 |
| chr4 | 40216550  | 40216923  | 2010003O02Rik | ENSMUSG00000028407 | 134  | 1    | 0.52 | 1    | 0.43 | 1    | 0.62 |
| chr4 | 41454050  | 41454359  | 1110017D15Rik | ENSMUSG00000028441 | 583  | 0.08 | 0.11 | 0.11 | 0.12 | 0.08 | 0.12 |
| chr4 | 43536144  | 43537415  | Tpm2          | ENSMUSG00000028464 | -519 | 0.15 | 0.17 | 0.14 | 0.18 | 0.13 | 0.19 |
| chr4 | 43668972  | 43669407  | Hint2         | ENSMUSG00000028470 | 126  | 0.11 | 0.12 | 0.11 | 0.16 | 0.11 | 0.15 |
| chr4 | 43682094  | 43682356  | Tmem8b        | ENSMUSG00000078716 | 66   | 0.11 | 0.15 | 0.07 | 0.11 | 0.11 | 0.2  |
| chr4 | 45024613  | 45025295  | Zbtb5         | ENSMUSG00000049657 | 63   | 0.15 | 0.2  | 0.11 | 0.12 | 0.15 | 0.12 |
| chr4 | 45333058  | 45333515  | Exosc3        | ENSMUSG00000028322 | -78  | 0.08 | 0.06 | 0.07 | 0.15 | 0.07 | 0.16 |
| chr4 | 45839229  | 45839721  | Igfbpl1       | ENSMUSG00000035551 | 320  | 0.06 | 0.1  | 0.05 | 0.1  | 0.05 | 0.08 |
| chr4 | 47221120  | 47221691  | Gm12426       | ENSMUSG00000087500 | -74  | 0.17 | 0.2  | 0.1  | 0.17 | 0.21 | 0.09 |
| chr4 | 53792488  | 53792746  | Tal2          | ENSMUSG00000028417 | 40   | 0.07 | 0.05 | 0.07 | 0.2  | 0.1  | 0.12 |
| chr4 | 54957909  | 54958311  | Zfp462        | ENSMUSG00000060206 | 190  | 0.5  | 0.5  | 0.24 | 0.18 | 0.37 | 0.3  |
| chr4 | 55362489  | 55363648  | Rad23b        | ENSMUSG00000028426 | 153  | 0.13 | 0.16 | 0.08 | 0.16 | 0.13 | 0.13 |
| chr4 | 56877471  | 56878386  | Cttnal1       | ENSMUSG00000038816 | 98   | 0.14 | 0.13 | 0.11 | 0.12 | 0.13 | 0.09 |
| chr4 | 57154777  | 57155018  | Epb4.114b     | ENSMUSG00000028434 | 1412 | 0.24 | 0.35 | 0.17 | 0.39 | 0.25 | 0.15 |
| chr4 | 57580711  | 57581159  | Palm2         | ENSMUSG00000090053 | -96  | 0.1  | 0.1  | 0.33 | 0.17 | 0.09 | 0.13 |



|      |           |           |               |                     |       |      |      |      |      |      |      |
|------|-----------|-----------|---------------|---------------------|-------|------|------|------|------|------|------|
| chr4 | 59796282  | 59796913  | 1110054O05Rik | ENSMUSG00000038544  | 83    | 0.08 | 0.07 | 0.1  | 0.12 | 0.09 | 0.11 |
| chr4 | 62131787  | 62132050  | Wdr31         | ENSMUSG00000028391  | -10   | 0.5  | NA   | 0.17 | 0.68 | 0.47 | 0.21 |
| chr4 | 62163066  | 62163345  | Hdhd3         | ENSMUSG00000038422  | 105   | 0.06 | 0.07 | 0.09 | 0.17 | 0.06 | 0.12 |
| chr4 | 66063822  | 66064095  | Astn2         | ENSMUSG00000028373  | 1542  | 0.17 | 0.14 | 0.11 | 0.14 | 0.08 | 0.25 |
| chr4 | 73659465  | 73659866  | Frmd3         | ENSMUSG00000049122  | 317   | 0.08 | 0.08 | 0.07 | 0.17 | 0.08 | 0.15 |
| chr4 | 82152614  | 82152845  | Nfib          | ENSMUSG00000008575  | -1046 | 0.06 | 0.09 | 0.14 | 0.23 | 0.06 | 0.22 |
| chr4 | 83063426  | 83064068  | Snopc3        | ENSMUSG00000028483  | 119   | 0.08 | 0.1  | 0.09 | 0.15 | 0.09 | 0.12 |
| chr4 | 88409267  | 88409784  | Gm13284       | ENSMUSG000000082789 | -88   | 0.18 | 0.13 | 0.11 | 0.11 | 0.15 | 0.14 |
| chr4 | 97438737  | 97439102  | Nfia          | ENSMUSG00000028565  | -506  | 0.11 | 0.26 | 0.09 | 0.23 | 0.14 | 0.11 |
| chr4 | 98062360  | 98062905  | Inadl         | ENSMUSG000000061859 | 156   | 0.27 | 0.75 | 0.15 | 0.29 | 0.3  | 0.17 |
| chr4 | 99495772  | 99496206  | Itgb3bp       | ENSMUSG00000028549  | -208  | 0.09 | 0.17 | 0.11 | 0.22 | 0.06 | 0.15 |
| chr4 | 102431917 | 102432159 | Sgip1         | ENSMUSG00000028524  | 211   | 1    | NA   | NA   | NA   | 1    | NA   |
| chr4 | 107562292 | 107562822 | 0610037L13Rik | ENSMUSG00000028608  | 139   | 0.08 | 0.06 | 0.08 | 0.18 | 0.12 | 0.13 |
| chr4 | 107595974 | 107596309 | Cpt2          | ENSMUSG00000028607  | -89   | 0.06 | 0.15 | 0.1  | 0.14 | 0.06 | 0.13 |
| chr4 | 107838000 | 107838230 | Echdc2        | ENSMUSG00000028601  | 73    | 0.12 | 0.17 | 0.23 | 0.15 | 0.09 | 0.14 |
| chr4 | 108055810 | 108056302 | Fam159a       | ENSMUSG00000059816  | -102  | 0.11 | 0.16 | 0.07 | 0.11 | 0.11 | 0.17 |
| chr4 | 108520427 | 108521266 | Kti12         | ENSMUSG00000073775  | 384   | 0.09 | 0.09 | 0.11 | 0.14 | 0.08 | 0.18 |
| chr4 | 108874439 | 108874945 | Osbp19        | ENSMUSG00000028559  | 130   | 0.11 | 0.04 | 0.12 | 0.13 | 0.1  | 0.09 |
| chr4 | 115410167 | 115410680 | 4732418C07Rik | ENSMUSG00000034210  | 74    | 0.11 | 0.11 | 0.08 | 0.11 | 0.12 | 0.3  |
| chr4 | 115500541 | 115501060 | Mob3c         | ENSMUSG00000028709  | 103   | 0.15 | 0.22 | 0.1  | 0.19 | 0.14 | 0.1  |
| chr4 | 116180033 | 116180573 | Ipp           | ENSMUSG00000028696  | 149   | 0.41 | 0.33 | 0.1  | 0.15 | 0.41 | 0.12 |
| chr4 | 116768463 | 116768942 | Ptch2         | ENSMUSG00000028681  | 22    | 0.11 | NA   | 0.18 | 0.11 | 0.08 | 0.16 |
| chr4 | 116924462 | 116924893 | Gm1661        | ENSMUSG00000060268  | -155  | 0.2  | 0.44 | 0.08 | 0.25 | 0.1  | 0.13 |
| chr4 | 118293345 | 118293887 | Wdr65         | ENSMUSG00000028730  | -234  | 0.11 | 0.08 | 0.14 | 0.24 | 0.05 | 0.17 |
| chr4 | 118904972 | 118906069 | AU022252      | ENSMUSG00000078584  | -237  | 0.17 | 0.38 | 0.13 | 0.22 | 0.15 | 0.16 |
| chr4 | 118992787 | 118993198 | Ppih          | ENSMUSG00000060288  | 30    | 0.18 | 0.18 | 0.12 | 0.12 | 0.11 | 0.18 |
| chr4 | 120689414 | 120690008 | Smap2         | ENSMUSG00000032870  | 141   | 0.2  | 0.3  | 0.12 | 0.13 | 0.15 | 0.14 |
| chr4 | 122693767 | 122694135 | Trit1         | ENSMUSG00000028653  | 111   | 0.1  | 0.17 | 0.2  | 0.21 | 0.12 | 0.22 |
| chr4 | 122959850 | 122961006 | Pabpc4        | ENSMUSG00000011257  | 360   | 0.15 | 0.34 | 0.08 | 0.13 | 0.15 | 0.13 |
| chr4 | 123395392 | 123395628 | Ndufs5        | ENSMUSG00000028648  | -86   | 0.18 | 0.12 | 0.11 | 0.12 | 0.22 | 0.16 |

|      |           |           |            |                     |      |      |      |      |      |      |      |
|------|-----------|-----------|------------|---------------------|------|------|------|------|------|------|------|
| chr4 | 125963846 | 125964360 | Col8a2     | ENSMUSG00000056174  | 66   | 0.16 | 0.34 | 0.15 | 0.18 | 0.15 | 0.21 |
| chr4 | 125978283 | 125978793 | Col8a2     | ENSMUSG00000056174  | 764  | 0.15 | 0.19 | 0.1  | 0.13 | 0.16 | 0.15 |
| chr4 | 126233943 | 126234666 | Clspn      | ENSMUSG00000042489  | 125  | 0.25 | 0.45 | 0.13 | 0.18 | 0.14 | 0.15 |
| chr4 | 128866114 | 128867437 | S100ppb    | ENSMUSG00000040928  | -33  | 0.09 | 0.06 | 0.07 | 0.08 | 0.09 | 0.15 |
| chr4 | 128916069 | 128916376 | C77080     | ENSMUSG00000050390  | 196  | 0.11 | 0.13 | 0.13 | 0.25 | 0.09 | 0.14 |
| chr4 | 129349536 | 129350070 | Kpna6      | ENSMUSG00000003731  | -31  | 0.1  | 0.1  | 0.1  | 0.21 | 0.12 | 0.13 |
| chr4 | 129952134 | 129952889 | Serinc2    | ENSMUSG00000023232  | -49  | 1    | 0.59 | 0.14 | 0.21 | 0.92 | 0.18 |
| chr4 | 131399301 | 131399783 | Mecr       | ENSMUSG00000028910  | 157  | 0.25 | 0.32 | 0.11 | 0.24 | 0.26 | 0.14 |
| chr4 | 131909324 | 131909640 | Rcc1       | ENSMUSG00000028896  | 38   | 0.25 | 0.38 | 0.11 | 0.33 | 0.17 | 0.12 |
| chr4 | 132019647 | 132019949 | Med18      | ENSMUSG00000066042  | 38   | 0.5  | 0.11 | 0.18 | 0.36 | 0.32 | 0.31 |
| chr4 | 132352189 | 132352392 | BC013712   | ENSMUSG00000037731  | 12   | 0.11 | 0.07 | 0.09 | 0.14 | 0.09 | 0.14 |
| chr4 | 132776690 | 132776940 | Cd164l2    | ENSMUSG00000028865  | 90   | 0.42 | 0.73 | 0.15 | 0.26 | 0.45 | 0.22 |
| chr4 | 132806725 | 132807061 | Map3k6     | ENSMUSG00000028862  | 129  | 0.16 | 0.12 | 0.18 | 0.25 | 0.15 | 0.16 |
| chr4 | 133157241 | 133157601 | Sfn        | ENSMUSG00000047281  | 662  | 0.75 | 0.83 | 0.69 | NA   | 0.77 | 0.66 |
| chr4 | 133443487 | 133443950 | Rps6ka1    | ENSMUSG00000003644  | -229 | 0.13 | 0.17 | 0.11 | 0.16 | 0.15 | 0.1  |
| chr4 | 133684450 | 133684778 | Sh3bgrl3   | ENSMUSG00000028843  | 38   | 0.58 | 0.64 | 0.11 | 0.17 | 0.56 | 0.14 |
| chr4 | 135803836 | 135804621 | Tcea3      | ENSMUSG0000001604   | 361  | 0.12 | 0.07 | 0.08 | 0.12 | 0.12 | 0.17 |
| chr4 | 136390837 | 136392300 | Ephb2      | ENSMUSG00000028664  | 190  | 0.17 | 0.11 | 0.09 | 0.16 | 0.17 | 0.15 |
| chr4 | 137220525 | 137220874 | Rap1gap    | ENSMUSG00000041351  | 58   | 0.18 | 0.2  | 0.13 | 0.14 | 0.19 | 0.17 |
| chr4 | 137860569 | 137861203 | Ddost      | ENSMUSG00000028757  | 241  | 0.09 | 0.1  | 0.11 | 0.12 | 0.08 | 0.16 |
| chr4 | 140517136 | 140517584 | Sdhb       | ENSMUSG00000009863  | 44   | 0.09 | 0.15 | 0.12 | 0.14 | 0.09 | 0.14 |
| chr4 | 141278689 | 141279452 | Ddi2       | ENSMUSG000000078515 | 264  | 0.09 | 0.18 | 0.11 | 0.12 | 0.09 | 0.16 |
| chr4 | 142979277 | 142979526 | Anp32b-ps1 | ENSMUSG00000081792  | 80   | 0.07 | 0.05 | 0.08 | 0.12 | 0.08 | 0.12 |
| chr4 | 146206650 | 146207488 | Gm13169    | ENSMUSG00000084127  | -286 | 0.67 | 0.69 | 0.62 | 1    | 1    | 0.83 |
| chr4 | 147310573 | 147310919 | Plod1      | ENSMUSG00000019055  | 71   | 0.14 | 0.1  | 0.09 | 0.08 | 0.12 | 0.14 |
| chr4 | 147533744 | 147534900 | Fbxo44     | ENSMUSG00000029001  | -564 | 0.09 | 0.07 | 0.1  | 0.17 | 0.09 | 0.15 |
| chr4 | 147661564 | 147662366 | Ptchd2     | ENSMUSG00000041544  | 109  | 0.25 | 0.47 | 0.16 | 0.14 | 0.19 | 0.09 |
| chr4 | 147822306 | 147822977 | Mtor       | ENSMUSG00000028991  | -79  | 0.19 | 0.26 | 0.14 | 0.21 | 0.15 | 0.16 |
| chr4 | 148540364 | 148541088 | Pgd        | ENSMUSG00000028961  | 43   | 0.13 | 0.1  | 0.11 | 0.16 | 0.12 | 0.17 |
| chr4 | 149111775 | 149112349 | Tmem201    | ENSMUSG00000044700  | -183 | 0.07 | 0.06 | 0.09 | 0.12 | 0.07 | 0.12 |

|      |           |           |               |                    |       |      |      |      |      |      |      |
|------|-----------|-----------|---------------|--------------------|-------|------|------|------|------|------|------|
| chr4 | 149382688 | 149383236 | H6pd          | ENSMUSG00000028980 | 170   | 0.08 | 0.07 | 0.13 | 0.09 | 0.09 | 0.1  |
| chr4 | 149655229 | 149655828 | Rere          | ENSMUSG00000039852 | -227  | 0.5  | 0.17 | 0.13 | 0.25 | 0.2  | 0.2  |
| chr4 | 151489960 | 151490387 | Tnfrsf25      | ENSMUSG00000024793 | 130   | 0.14 | 0.11 | 0.11 | 0.27 | 0.14 | 0.18 |
| chr4 | 151533803 | 151534616 | Hes2          | ENSMUSG00000028940 | 551   | 0.23 | 0.45 | 0.2  | 0.35 | 0.23 | 0.24 |
| chr4 | 153515582 | 153515838 | Wdr8          | ENSMUSG00000029029 | -771  | 0.12 | 1    | 0.29 | 0.27 | 0.17 | 0.09 |
| chr4 | 153534439 | 153535203 | Tprgl         | ENSMUSG00000029030 | -106  | 0.13 | 0.24 | 0.11 | 0.18 | 0.14 | 0.18 |
| chr4 | 154595647 | 154597369 | Ski           | ENSMUSG00000029050 | 121   | 0.25 | 0.24 | 0.13 | 0.15 | 0.24 | 0.14 |
| chr4 | 155028836 | 155029068 | Mmp23         | ENSMUSG00000029061 | -1459 | 0.16 | NA   | 0.19 | 0.25 | 0.11 | 0.19 |
| chr4 | 155588407 | 155588684 | 2310042D19Rik | ENSMUSG00000078486 | -1491 | 1    | 0.92 | 0.92 | 0.86 | 1    | 0.88 |
| chr4 | 4065571   | 4066132   | Penk          | ENSMUSG00000045573 | -227  | 0.25 | 0.2  | 0.12 | 0.17 | NA   | 0.1  |
| chr4 | 12014872  | 12015077  | Tmem67        | ENSMUSG00000049488 | 100   | 0.09 | NA   | 0.14 | 0.3  | NA   | 0.16 |
| chr4 | 12016435  | 12017269  | C430048L16Rik | ENSMUSG00000052137 | 266   | NA   | NA   | 0.08 | 0.17 | NA   | 0.22 |
| chr4 | 15076039  | 15076276  | Necab1        | ENSMUSG00000040536 | -49   | NA   | NA   | 0.14 | 0.38 | 0.25 | 0.1  |
| chr4 | 19502130  | 19502597  | Fam82b        | ENSMUSG00000028229 | 54    | NA   | 0.16 | 0.12 | 0.21 | 0.06 | 0.15 |
| chr4 | 21612723  | 21613003  | Prdm13        | ENSMUSG00000040478 | 65    | NA   | 0.67 | 0.14 | 0.67 | NA   | 0.32 |
| chr4 | 32886945  | 32887474  | Lym2          | ENSMUSG00000045854 | -19   | 1    | NA   | NA   | 0.12 | NA   | 0.1  |
| chr4 | 41222058  | 41222798  | Ubap2         | ENSMUSG00000028433 | -279  | NA   | NA   | 0.14 | NA   | 0.2  | 0.43 |
| chr4 | 41642136  | 41643079  | Cntfr         | ENSMUSG00000028444 | -133  | NA   | 1    | 0.08 | 0.35 | NA   | 0.07 |
| chr4 | 41687597  | 41688275  | Sigmar1       | ENSMUSG00000036078 | -15   | 1    | 0.33 | 0.28 | 1    | NA   | 0.23 |
| chr4 | 41702297  | 41702744  | Galt          | ENSMUSG00000036073 | -111  | NA   | 1    | 0.67 | NA   | NA   | 0.25 |
| chr4 | 43023075  | 43023438  | Fancg         | ENSMUSG00000028453 | -162  | NA   | 0.09 | 0.09 | 0.17 | 0.5  | 0.19 |
| chr4 | 43043765  | 43044423  | Gm17599       | ENSMUSG00000091065 | 223   | NA   | 0.25 | 0.11 | NA   | NA   | 0.14 |
| chr4 | 44723510  | 44724010  | Pax5          | ENSMUSG00000014030 | -203  | NA   | NA   | 1    | NA   | NA   | 1    |
| chr4 | 45031437  | 45031815  | Polr1e        | ENSMUSG00000028318 | 171   | NA   | 0.54 | 0.09 | 0.21 | 0.32 | 0.19 |
| chr4 | 45811880  | 45812145  | Aldh1b1       | ENSMUSG00000035561 | 118   | NA   | 0.12 | 0.1  | 0.15 | 0.12 | 0.12 |
| chr4 | 49072094  | 49072799  | E130309F12Rik | ENSMUSG00000063446 | 301   | NA   | 0.75 | 0.14 | 0.14 | 1    | 0.16 |
| chr4 | 58956399  | 58956690  | Zkscan16      | ENSMUSG00000038630 | 44    | NA   | NA   | 0.33 | NA   | NA   | 0.33 |
| chr4 | 62185729  | 62186607  | Pole3         | ENSMUSG00000028394 | -96   | NA   | 0.5  | 0.12 | 0.15 | 0.11 | 0.17 |
| chr4 | 65265921  | 65266241  | Trim32        | ENSMUSG00000051675 | 61    | NA   | NA   | NA   | NA   | 0.25 | NA   |
| chr4 | 69910218  | 69910473  | Gm11226       | ENSMUSG00000080902 | 62    | 1    | NA   | 1    | NA   | NA   | 1    |

|      |           |           |               |                    |       |      |      |      |      |      |      |
|------|-----------|-----------|---------------|--------------------|-------|------|------|------|------|------|------|
| chr4 | 86257395  | 86257983  | Haus6         | ENSMUSG00000038047 | 234   | NA   | 0.4  | 0.23 | 0.18 | 0.12 | 0.29 |
| chr4 | 88406354  | 88406571  | Gm13283       | ENSMUSG00000078642 | 439   | NA   | 0.5  | 0.15 | 0.64 | NA   | 0.16 |
| chr4 | 88428366  | 88428677  | Ifnz          | ENSMUSG00000073810 | 486   | 0.1  | 0.07 | 0.17 | 0.05 | NA   | 0.19 |
| chr4 | 88440067  | 88440378  | Gm17476       | ENSMUSG00000090834 | 73    | NA   | NA   | 0.12 | NA   | NA   | 1    |
| chr4 | 88445900  | 88446211  | Gm17612       | ENSMUSG00000091535 | 73    | NA   | NA   | NA   | 1    | NA   | NA   |
| chr4 | 88451766  | 88452077  | Gm13288       | ENSMUSG00000070908 | 486   | NA   | 0.63 | 0.08 | 0.05 | NA   | 0.06 |
| chr4 | 94281089  | 94281331  | lft74         | ENSMUSG00000028576 | 28    | NA   | NA   | NA   | NA   | NA   | 1    |
| chr4 | 101389950 | 101390222 | Lepr          | ENSMUSG00000057722 | 77    | 1    | NA   | 0.12 | NA   | NA   | 0.12 |
| chr4 | 103292211 | 103292727 | Dab1          | ENSMUSG00000028519 | 199   | NA   | 0.2  | 0.08 | 0.17 | 0.18 | 0.12 |
| chr4 | 104782559 | 104782760 | Prkaa2        | ENSMUSG00000028518 | -164  | NA   | 0.23 | 0.08 | 0.75 | 1    | NA   |
| chr4 | 107693786 | 107694004 | Podn          | ENSMUSG00000028600 | 236   | 1    | 1    | 0.62 | NA   | NA   | 0.92 |
| chr4 | 107790887 | 107791224 | Scp2          | ENSMUSG00000028603 | -55   | NA   | NA   | 0.17 | 0.24 | 0.33 | 0.09 |
| chr4 | 108000650 | 108001061 | 2010305A19Rik | ENSMUSG00000048351 | 110   | NA   | NA   | 0.07 | 0.2  | NA   | 0.08 |
| chr4 | 108133255 | 108133461 | Zcchc11       | ENSMUSG00000034610 | 743   | NA   | 0.33 | 0.13 | 0.17 | NA   | 0.18 |
| chr4 | 108790420 | 108790774 | Osbp19        | ENSMUSG00000028559 | 30    | NA   | NA   | NA   | NA   | NA   | 1    |
| chr4 | 112651955 | 112652447 | Gm12818       | ENSMUSG00000082678 | 217   | NA   | NA   | 0.51 | 0.61 | NA   | 0.33 |
| chr4 | 114574658 | 114574951 | 9130410C08Rik | ENSMUSG00000085323 | 660   | NA   | 0.11 | 0.14 | 0.18 | 0.09 | 0.29 |
| chr4 | 114672556 | 114673014 | Stil          | ENSMUSG00000028718 | 62    | NA   | NA   | NA   | NA   | NA   | 0.32 |
| chr4 | 115563105 | 115563480 | 6430628N08Rik | ENSMUSG00000034185 | 21    | NA   | 0.08 | 0.11 | 0.11 | 0.08 | 0.12 |
| chr4 | 115726304 | 115726564 | Nsun4         | ENSMUSG00000028706 | 47    | NA   | NA   | 0.13 | 0.25 | NA   | 0.06 |
| chr4 | 116497291 | 116497558 | Gm12996       | ENSMUSG00000086417 | -84   | NA   | 0.13 | 0.19 | 0.31 | 0.17 | 0.24 |
| chr4 | 117602017 | 117602420 | Artn          | ENSMUSG00000028539 | -200  | NA   | 1    | 0.13 | 0.08 | 0.47 | 0.13 |
| chr4 | 117884647 | 117884852 | Ptprf         | ENSMUSG00000033295 | -1403 | NA   | NA   | 0.93 | NA   | 1    | NA   |
| chr4 | 118032561 | 118032894 | Hyi           | ENSMUSG00000006395 | 132   | 0.03 | 0.15 | 0.07 | 0.13 | NA   | 0.08 |
| chr4 | 118846569 | 118846860 | Zfp691        | ENSMUSG00000045268 | 86    | NA   | NA   | 0.12 | 0.09 | NA   | 0.19 |
| chr4 | 119487419 | 119487650 | Hivep3        | ENSMUSG00000028634 | 201   | 1    | NA   | NA   | 1    | NA   | 0.17 |
| chr4 | 120527323 | 120527899 | Rims3         | ENSMUSG00000032890 | 190   | NA   | 0.37 | 0.08 | 0.19 | 0.08 | 0.1  |
| chr4 | 122638120 | 122638564 | Mfsd2a        | ENSMUSG00000028655 | 53    | NA   | 1    | 0.12 | 0.21 | 0.14 | 0.23 |
| chr4 | 124370604 | 124370847 | Utp11l        | ENSMUSG00000028907 | 53    | NA   | 0.6  | 0.1  | 0.09 | 0.06 | 0.14 |
| chr4 | 124562794 | 124563387 | Epha10        | ENSMUSG00000028876 | 47    | NA   | NA   | NA   | 1    | NA   | NA   |

|      |           |           |               |                    |       |      |      |      |      |      |      |
|------|-----------|-----------|---------------|--------------------|-------|------|------|------|------|------|------|
| chr4 | 125773780 | 125774090 | Lsm10         | ENSMUSG00000050188 | 68    | NA   | 0.04 | 0.3  | 0.12 | 0.4  | 0.22 |
| chr4 | 125932595 | 125932803 | Mtap7d1       | ENSMUSG00000028849 | 822   | NA   | NA   | 0.12 | 0.2  | NA   | 0.25 |
| chr4 | 125998385 | 125998850 | Adprh2        | ENSMUSG00000042558 | -12   | NA   | NA   | 0.5  | NA   | NA   | NA   |
| chr4 | 126738243 | 126738490 | Zmym1         | ENSMUSG00000043872 | -62   | NA   | NA   | 1    | NA   | NA   | 0.5  |
| chr4 | 126754279 | 126754822 | Zmym6         | ENSMUSG00000042408 | -77   | NA   | 0.17 | 0.18 | 0.22 | 0.25 | 0.27 |
| chr4 | 126921071 | 126921349 | BC003266      | ENSMUSG00000042380 | 182   | NA   | 0.42 | NA   | NA   | 0.19 | 0.11 |
| chr4 | 126991066 | 126991278 | Gja4          | ENSMUSG00000050234 | 111   | NA   | NA   | 0.14 | 0.21 | 0.17 | 0.15 |
| chr4 | 129054290 | 129054560 | Zbtb8a        | ENSMUSG00000028807 | 935   | NA   | NA   | 0.12 | 0.04 | 0.11 | NA   |
| chr4 | 129055034 | 129055285 | Zbtb8a        | ENSMUSG00000028807 | 201   | NA   | NA   | 0.11 | NA   | NA   | 0.16 |
| chr4 | 129317776 | 129318439 | Txlna         | ENSMUSG00000053841 | -223  | NA   | 1    | 0.24 | 0.2  | NA   | 0.19 |
| chr4 | 129785052 | 129785308 | Pef1          | ENSMUSG00000028779 | 380   | 0.07 | NA   | 0.09 | 0.12 | NA   | 0.18 |
| chr4 | 129985032 | 129985308 | Fabp3         | ENSMUSG00000028773 | -669  | NA   | NA   | 1    | 0.67 | NA   | 0.38 |
| chr4 | 131375384 | 131375593 | Ptpru         | ENSMUSG00000028909 | 1943  | NA   | NA   | NA   | NA   | NA   | 1    |
| chr4 | 131864513 | 131864823 | Snhg12        | ENSMUSG00000086290 | 75    | 1    | NA   | 0.25 | 1    | NA   | 0.25 |
| chr4 | 132089210 | 132089606 | Atpif1        | ENSMUSG00000054428 | -5    | NA   | NA   | NA   | NA   | NA   | 1    |
| chr4 | 132324236 | 132324765 | Rpa2          | ENSMUSG00000028884 | 253   | NA   | 0.17 | 0.1  | 0.17 | 0.14 | 0.22 |
| chr4 | 133556740 | 133557057 | Dhdds         | ENSMUSG00000012117 | -112  | NA   | 1    | 0.09 | 0.27 | NA   | 0.1  |
| chr4 | 133658491 | 133658826 | Ubxn11        | ENSMUSG00000012126 | 160   | 1    | NA   | 0.5  | 0.33 | NA   | 0.36 |
| chr4 | 133742386 | 133743280 | Ccdc21        | ENSMUSG00000037443 | 63    | NA   | NA   | 0.08 | 0.2  | NA   | 0.26 |
| chr4 | 135519460 | 135520138 | Gale          | ENSMUSG00000028671 | 157   | 0.62 | 1    | 0.19 | 0.16 | NA   | 0.38 |
| chr4 | 135542823 | 135543397 | 1110049F12Rik | ENSMUSG00000028669 | -278  | NA   | 0.15 | 0.11 | 0.13 | 0.24 | 0.19 |
| chr4 | 135608534 | 135609264 | Rpl11         | ENSMUSG00000059291 | -299  | NA   | 0.18 | 0.15 | 0.16 | 0.12 | 0.16 |
| chr4 | 138901973 | 138902219 | Ccnd3-ps      | ENSMUSG00000080708 | -1    | 0.17 | NA   | 0.49 | 0.56 | NA   | 0.62 |
| chr4 | 140462170 | 140462454 | Padl2         | ENSMUSG00000028927 | 53    | NA   | 1    | 0.27 | 0.56 | 1    | 0.18 |
| chr4 | 140566453 | 140566690 | Mfap2         | ENSMUSG00000060572 | 19    | NA   | NA   | 0.14 | 0.17 | NA   | 0.28 |
| chr4 | 140803302 | 140803596 | Arhgef19      | ENSMUSG00000028919 | 1138  | NA   | NA   | 0.33 | NA   | NA   | 0.3  |
| chr4 | 141020327 | 141020534 | Zbtb17        | ENSMUSG00000006215 | -303  | NA   | NA   | NA   | NA   | NA   | 1    |
| chr4 | 141028821 | 141029092 | Spen          | ENSMUSG00000040761 | -1548 | 1    | 1    | 0.68 | NA   | NA   | 0.96 |
| chr4 | 144483399 | 144483750 | Dhrs3         | ENSMUSG00000066026 | 452   | NA   | 1    | 0.5  | NA   | NA   | 0.78 |
| chr4 | 147242476 | 147242777 | Miip          | ENSMUSG00000029022 | -34   | NA   | 0.36 | 0.19 | 0.26 | 0.5  | 0.32 |

|      |           |           |               |                    |       |      |      |      |      |      |      |
|------|-----------|-----------|---------------|--------------------|-------|------|------|------|------|------|------|
| chr4 | 148511392 | 148511823 | Aptd1         | ENSMUSG00000073705 | 50    | NA   | 0.12 | 0.07 | 0.18 | 0.14 | 0.17 |
| chr4 | 148800171 | 148800972 | Ube4b         | ENSMUSG00000028960 | -246  | NA   | 0.17 | 0.2  | 0.15 | 0.19 | 0.32 |
| chr4 | 149072525 | 149072764 | Pik3cd        | ENSMUSG00000039936 | 17    | NA   | NA   | NA   | 0.8  | NA   | 0.36 |
| chr4 | 149461259 | 149462213 | Gpr157        | ENSMUSG00000047875 | 262   | NA   | NA   | NA   | 1    | NA   | 0.31 |
| chr4 | 151493637 | 151493945 | Tnfrsf25      | ENSMUSG00000024793 | 1711  | NA   | NA   | 0.17 | NA   | 0.21 | 0.14 |
| chr4 | 151527860 | 151528152 | Espn          | ENSMUSG00000028943 | -1526 | NA   | NA   | 0.25 | NA   | NA   | 0.27 |
| chr4 | 151532727 | 151532949 | Hes2          | ENSMUSG00000028940 | -138  | 0.33 | 0.5  | 0.16 | 0.12 | NA   | 0.26 |
| chr4 | 151689871 | 151690210 | Rnf207        | ENSMUSG00000058498 | 34    | NA   | NA   | 1    | 1    | NA   | 0.83 |
| chr4 | 154441016 | 154441311 | Pex10         | ENSMUSG00000029047 | 38    | NA   | 0.19 | 0.07 | 0.15 | 0.2  | 0.15 |
| chr4 | 155134880 | 155135321 | Atad3a        | ENSMUSG00000029036 | -63   | NA   | 0.21 | 0.08 | 0.17 | 0.12 | 0.19 |
| chr4 | 155148376 | 155148824 | Vwa1          | ENSMUSG00000042116 | 207   | 1    | 0.25 | 0.09 | 0.25 | NA   | 0.15 |
| chr4 | 155336494 | 155336821 | Fam132a       | ENSMUSG00000023571 | 230   | NA   | 1    | 0.14 | 0.3  | NA   | 0.2  |
| chr5 | 89149720  | 89150276  | Mob1b         | ENSMUSG00000006262 | 118   | 0.67 | 0.26 | 0.23 | 0.21 | 0.12 | 0.17 |
| chr5 | 122110355 | 122111169 | Acad10        | ENSMUSG00000029456 | -274  | 0.67 | 0.24 | 0.1  | 0.15 | 0.11 | 0.15 |
| chr5 | 143996807 | 143997227 | Zfp12         | ENSMUSG00000029587 | 175   | 1    | 0.65 | 0.26 | 0.33 | 0.11 | 0.12 |
| chr5 | 151396228 | 151397274 | N4bp21        | ENSMUSG00000041132 | 349   | 0.35 | 0.23 | 0.11 | 0.17 | 0.08 | 0.17 |
| chr5 | 101274980 | 101275911 | Agpat9        | ENSMUSG00000029314 | 296   | 0.68 | 0.46 | 0.11 | 0.14 | 0.3  | 0.2  |
| chr5 | 136164525 | 136165336 | Por           | ENSMUSG00000005514 | 24    | 0.7  | 0.25 | 0.14 | 0.24 | 0.13 | 0.14 |
| chr5 | 129514214 | 129514514 | Stx2          | ENSMUSG00000029428 | -66   | 0.76 | 0.05 | 0.05 | 0.11 | 0.13 | 0.11 |
| chr5 | 106305390 | 106306228 | Zfp326        | ENSMUSG00000029290 | 225   | 0.46 | 0.4  | 0.1  | 0.15 | 0.14 | 0.13 |
| chr5 | 54389432  | 54390405  | Stim2         | ENSMUSG00000039156 | 262   | 0.2  | 0.14 | 0.11 | 0.17 | 0.08 | 0.14 |
| chr5 | 50449498  | 50450467  | Gpr125        | ENSMUSG00000029090 | 225   | 0.4  | 0.23 | 0.11 | 0.12 | 0.12 | 0.14 |
| chr5 | 35731048  | 35732117  | E130018O15Rik | ENSMUSG00000055944 | -457  | 0.16 | 0.11 | 0.07 | 0.11 | 0.06 | 0.11 |
| chr5 | 130089700 | 130091200 | AC114657.1    | ENSMUSG00000092933 | 420   | 0.27 | 0.17 | 0.18 | 0.19 | 0.09 | 0.16 |
| chr5 | 15440160  | 15441154  | Cacna2d1      | ENSMUSG00000040118 | 148   | 0.3  | 0.23 | 0.09 | 0.11 | 0.1  | 0.13 |
| chr5 | 130555139 | 130555726 | Tpst1         | ENSMUSG00000034118 | 192   | 0.25 | 0.11 | 0.12 | 0.13 | 0.11 | 0.11 |
| chr5 | 34338388  | 34340335  | Nat8l         | ENSMUSG00000048142 | 728   | 0.28 | 0.17 | 0.11 | 0.16 | 0.13 | 0.13 |
| chr5 | 145900459 | 145901698 | Pdap1         | ENSMUSG00000029623 | -211  | 0.26 | 0.23 | 0.11 | 0.14 | 0.06 | 0.16 |
| chr5 | 3340989   | 3344607   | Cdk6          | ENSMUSG00000040274 | -1095 | 0.34 | 0.2  | 0.16 | 0.22 | 0.11 | 0.16 |
| chr5 | 135517838 | 135518064 | Stx1a         | ENSMUSG00000007207 | 815   | 0.85 | 0.81 | 0.59 | 0.76 | 0.45 | 0.61 |

|      |           |           |               |                     |      |      |      |      |      |      |      |
|------|-----------|-----------|---------------|---------------------|------|------|------|------|------|------|------|
| chr5 | 34529694  | 34530897  | Mxd4          | ENSMUSG00000037235  | 64   | 0.41 | 0.15 | 0.12 | 0.22 | 0.08 | 0.15 |
| chr5 | 123591689 | 123593206 | Setd1b        | ENSMUSG00000038384  | 245  | 0.26 | 0.15 | 0.1  | 0.15 | 0.12 | 0.17 |
| chr5 | 124170182 | 124170935 | Zcchc8        | ENSMUSG00000029427  | 495  | 0.35 | 0.15 | 0.13 | 0.2  | 0.16 | 0.19 |
| chr5 | 144519029 | 144519233 | D130017N08Rik | ENSMUSG000000087189 | -63  | 0.64 | 0.16 | 0.11 | 0.15 | 0.1  | 0.28 |
| chr5 | 23356243  | 23356796  | 2700038G22Rik | ENSMUSG000000086802 | 104  | 0.62 | 0.07 | 0.11 | 0.12 | 0.06 | 0.16 |
| chr5 | 123973582 | 123974437 | Diablo        | ENSMUSG00000029433  | 133  | 0.16 | 0.13 | 0.09 | 0.13 | 0.06 | 0.12 |
| chr5 | 66087975  | 66089895  | Pds5a         | ENSMUSG00000029202  | 160  | 0.19 | 0.14 | 0.1  | 0.14 | 0.1  | 0.15 |
| chr5 | 73683872  | 73684436  | Ociad1        | ENSMUSG00000029152  | 121  | 0.4  | 0.75 | 0.09 | 0.14 | 0.07 | 0.12 |
| chr5 | 121144423 | 121145113 | Dtx1          | ENSMUSG00000029603  | 644  | 0.51 | 0.46 | 0.56 | 0.69 | 0.3  | 0.53 |
| chr5 | 98614150  | 98615734  | A73003517Rik  | ENSMUSG000000045238 | 61   | 0.34 | 0.14 | 0.14 | 0.18 | 0.14 | 0.16 |
| chr5 | 76732737  | 76734129  | Clock         | ENSMUSG00000029238  | 140  | 0.14 | 0.07 | 0.08 | 0.1  | 0.08 | 0.11 |
| chr5 | 33616762  | 33618018  | Ctbp1         | ENSMUSG00000037373  | 228  | 0.22 | 0.13 | 0.11 | 0.13 | 0.09 | 0.1  |
| chr5 | 111199070 | 111200156 | Ep400         | ENSMUSG00000029505  | -439 | 0.71 | 0.53 | 0.26 | 0.39 | 0.35 | 0.24 |
| chr5 | 32913232  | 32914220  | Yes1          | ENSMUSG00000014932  | 120  | 0.17 | 0.2  | 0.08 | 0.11 | 0.08 | 0.16 |
| chr5 | 106128740 | 106129829 | Lrrc8d        | ENSMUSG000000046079 | 296  | 0.26 | 0.12 | 0.12 | 0.13 | 0.1  | 0.14 |
| chr5 | 136253760 | 136255022 | Styx11        | ENSMUSG00000019178  | -283 | 0.33 | 0.23 | 0.11 | 0.15 | 0.12 | 0.13 |
| chr5 | 37727759  | 37728213  | Evc           | ENSMUSG00000029122  | 119  | 0.44 | 0.16 | 0.11 | 0.11 | 0.1  | 0.14 |
| chr5 | 31754735  | 31754951  | Zfp512        | ENSMUSG000000062761 | 34   | 0.34 | 0.17 | 0.11 | 0.17 | 0.09 | 0.16 |
| chr5 | 3928043   | 3928527   | Akap9         | ENSMUSG000000040407 | 231  | 0.07 | 0.21 | 0.17 | 0.15 | 0.17 | 0.17 |
| chr5 | 108415747 | 108416475 | Fam69a        | ENSMUSG00000029270  | -59  | 0.07 | 0.19 | 0.11 | 0.14 | 0.27 | 0.11 |
| chr5 | 23180714  | 23182282  | Srpk2         | ENSMUSG000000062604 | 288  | 0.21 | 0.19 | 0.11 | 0.15 | 0.11 | 0.15 |
| chr5 | 143723502 | 143724049 | Fscn1         | ENSMUSG00000029581  | -857 | 0.32 | 0.09 | 0.15 | 0.13 | 0.07 | 0.18 |
| chr5 | 67067694  | 67068228  | Gm16832       | ENSMUSG000000087601 | -225 | 0.11 | 0.43 | 0.13 | 0.33 | 0.62 | 0.12 |
| chr5 | 122286325 | 122287566 | Sh2b3         | ENSMUSG000000042594 | -119 | 0.28 | 0.22 | 0.11 | 0.16 | 0.14 | 0.14 |
| chr5 | 74590881  | 74591781  | Ras11b        | ENSMUSG000000049907 | 10   | 0.48 | 0.3  | 0.07 | 0.14 | 0.13 | 0.08 |
| chr5 | 77403376  | 77404143  | Srp72         | ENSMUSG000000036323 | 51   | 0.2  | 0.23 | 0.12 | 0.18 | 0.07 | 0.13 |
| chr5 | 96589939  | 96591736  | Cnot6l        | ENSMUSG000000034724 | -271 | 0.18 | 0.13 | 0.14 | 0.17 | 0.09 | 0.14 |
| chr5 | 109122963 | 109124182 | Fgfr11        | ENSMUSG00000008090  | 324  | 0.25 | 0.23 | 0.08 | 0.14 | 0.11 | 0.11 |
| chr5 | 63157085  | 63157769  | Arap2         | ENSMUSG000000037999 | 10   | 0.24 | 0.18 | 0.09 | 0.13 | 0.07 | 0.08 |
| chr5 | 131782202 | 131783833 | Wbscr17       | ENSMUSG000000034040 | -232 | 0.35 | 0.15 | 0.15 | 0.17 | 0.09 | 0.17 |

|      |           |           |               |                    |       |      |      |      |      |      |      |
|------|-----------|-----------|---------------|--------------------|-------|------|------|------|------|------|------|
| chr5 | 124133520 | 124134381 | Clip1         | ENSMUSG00000049550 | 334   | 0.23 | 0.1  | 0.11 | 0.15 | 0.08 | 0.12 |
| chr5 | 38550249  | 38551019  | Nsg1          | ENSMUSG00000029126 | 72    | 0.28 | 0.17 | 0.12 | 0.12 | 0.11 | 0.09 |
| chr5 | 105948397 | 105948960 | Lrrc8c        | ENSMUSG00000054720 | 271   | 0.25 | 0.09 | 0.1  | 0.11 | 0.06 | 0.1  |
| chr5 | 124803488 | 124804659 | Cdk2ap1       | ENSMUSG00000029394 | 607   | 0.32 | 0.2  | 0.1  | 0.2  | 0.15 | 0.18 |
| chr5 | 35448072  | 35448472  | Lrpap1        | ENSMUSG00000029103 | 66    | 0.57 | 0.35 | 0.25 | 0.28 | 0.23 | 0.32 |
| chr5 | 123844475 | 123845396 | Mlxip         | ENSMUSG00000038342 | 128   | 0.27 | 0.13 | 0.13 | 0.22 | 0.08 | 0.17 |
| chr5 | 65883659  | 65884553  | 1110003E01Rik | ENSMUSG00000037822 | 4     | 0.28 | 0.19 | 0.1  | 0.13 | 0.14 | 0.15 |
| chr5 | 115685362 | 115685884 | Pop5          | ENSMUSG00000060152 | -222  | 0.2  | 0.23 | 0.15 | 0.23 | 0.48 | 0.16 |
| chr5 | 140797257 | 140797726 | Mad11l        | ENSMUSG00000029554 | 13    | 0.23 | 0.17 | 0.09 | 0.17 | 0.09 | 0.11 |
| chr5 | 143576681 | 143580340 | Tnrc18        | ENSMUSG00000039477 | 556   | 0.15 | 0.27 | 0.14 | 0.2  | 0.27 | 0.22 |
| chr5 | 44172861  | 44173714  | Fbxl5         | ENSMUSG00000039753 | 54    | 0.15 | 0.09 | 0.07 | 0.08 | 0.06 | 0.13 |
| chr5 | 135539684 | 135540783 | Wbscr22       | ENSMUSG00000005378 | -315  | 0.62 | 0.1  | 0.13 | 0.19 | 0.21 | 0.16 |
| chr5 | 93104060  | 93104283  | Ccdc158       | ENSMUSG00000050050 | -20   | 0.67 | 0.33 | 0.11 | 0.21 | 0.24 | 0.16 |
| chr5 | 17080257  | 17080661  | Sema3c        | ENSMUSG00000028780 | -8    | 0.33 | 0.12 | 0.11 | 0.13 | 0.07 | 0.08 |
| chr5 | 123794081 | 123795704 | Gm15860       | ENSMUSG00000087336 | -446  | 0.16 | 0.08 | 0.08 | 0.12 | 0.09 | 0.1  |
| chr5 | 21849871  | 21851195  | Reln          | ENSMUSG00000042453 | -263  | 0.15 | 0.15 | 0.13 | 0.1  | 0.07 | 0.15 |
| chr5 | 110877002 | 110877800 | Fbrsl1        | ENSMUSG00000043323 | 121   | 0.28 | 0.15 | 0.13 | 0.12 | 0.15 | 0.15 |
| chr5 | 67998484  | 67999988  | Shisa3        | ENSMUSG00000050010 | 114   | 0.35 | 0.26 | 0.1  | 0.18 | 0.15 | 0.12 |
| chr5 | 123588706 | 123589330 | AI480526      | ENSMUSG00000090086 | 338   | 0.23 | 0.12 | 0.09 | 0.13 | 0.1  | 0.11 |
| chr5 | 96803054  | 96803876  | Fras1         | ENSMUSG00000034687 | 491   | 0.25 | 0.11 | 0.26 | 0.12 | 0.06 | 0.13 |
| chr5 | 107124939 | 107125835 | Zfp644        | ENSMUSG00000049606 | -393  | 0.3  | 0.17 | 0.11 | 0.17 | 0.14 | 0.15 |
| chr5 | 120120102 | 120121410 | Tbx3          | ENSMUSG00000018604 | 78    | 0.32 | 0.21 | 0.12 | 0.22 | 0.08 | 0.2  |
| chr5 | 121640861 | 121641360 | Ptpn11        | ENSMUSG00000043733 | 266   | 0.21 | 0.21 | 0.1  | 0.14 | 0.09 | 0.07 |
| chr5 | 135114388 | 135115299 | Eif4h         | ENSMUSG00000040731 | 356   | 0.41 | 0.27 | 0.11 | 0.15 | 0.28 | 0.16 |
| chr5 | 77836443  | 77837264  | Igfbp7        | ENSMUSG00000036256 | 216   | 0.12 | 0.09 | 0.12 | 0.15 | 0.06 | 0.11 |
| chr5 | 106886167 | 106888537 | Barhl2        | ENSMUSG00000034384 | 107   | 0.12 | 0.15 | 0.11 | 0.13 | 0.07 | 0.14 |
| chr5 | 117863608 | 117864361 | Ksr2          | ENSMUSG00000061578 | -25   | 0.31 | 0.13 | 0.11 | 0.22 | 0.11 | 0.17 |
| chr5 | 145874964 | 145875769 | Arpc1b        | ENSMUSG00000029622 | 282   | 0.2  | 0.14 | 0.15 | 0.17 | 0.08 | 0.16 |
| chr5 | 31370828  | 31371429  | Cad           | ENSMUSG00000013629 | -1601 | 0.59 | 0.88 | 0.67 | 0.76 | 0.94 | 0.93 |
| chr5 | 38215113  | 38216046  | Msx1          | ENSMUSG00000048450 | 243   | 0.37 | 0.25 | 0.12 | 0.17 | 0.1  | 0.15 |



|      |           |           |         |                    |      |      |      |      |      |      |      |
|------|-----------|-----------|---------|--------------------|------|------|------|------|------|------|------|
| chr5 | 147032644 | 147033144 | Rnf6    | ENSMUSG00000029634 | 98   | 0.21 | 0.18 | 0.11 | 0.15 | 0.07 | 0.14 |
| chr5 | 123064109 | 123064607 | Ift81   | ENSMUSG00000029469 | 96   | 0.28 | 0.35 | 0.08 | 0.18 | 0.12 | 0.11 |
| chr5 | 143873944 | 143874759 | Rnf216  | ENSMUSG00000045078 | 322  | 0.34 | 0.12 | 0.09 | 0.12 | 0.17 | 0.12 |
| chr5 | 29761183  | 29761935  | Nom1    | ENSMUSG00000001569 | 355  | 1    | 0.53 | 0.24 | 0.11 | 0.41 | 0.15 |
| chr5 | 116081440 | 116081836 | Rab35   | ENSMUSG00000029518 | -300 | 0.14 | 0.07 | 0.07 | 0.13 | 0.06 | 0.13 |
| chr5 | 108297367 | 108298406 | Evi5    | ENSMUSG00000011831 | -479 | 0.16 | 0.1  | 0.09 | 0.15 | 0.1  | 0.14 |
| chr5 | 8893613   | 8894015   | Abcb4   | ENSMUSG00000042476 | 97   | 0.33 | 0.16 | 0.09 | 0.22 | 0.13 | 0.1  |
| chr5 | 124565917 | 124566708 | Arl6ip4 | ENSMUSG00000029404 | 214  | 0.29 | 0.09 | 0.1  | 0.16 | 0.1  | 0.15 |
| chr5 | 143942051 | 143942596 | Rbak    | ENSMUSG00000061898 | 86   | 0.13 | 0.12 | 0.14 | 0.2  | 0.32 | 0.09 |
| chr5 | 93472811  | 93474642  | Sowahb  | ENSMUSG00000045314 | 322  | 0.15 | 0.12 | 0.11 | 0.13 | 0.09 | 0.14 |
| chr5 | 129525548 | 129526848 | Ran     | ENSMUSG00000029430 | 254  | 0.33 | 0.2  | 0.19 | 0.2  | 0.16 | 0.16 |
| chr5 | 138226833 | 138228178 | Mepce   | ENSMUSG00000029726 | 386  | 0.09 | 0.22 | 0.1  | 0.26 | 0.23 | 0.16 |
| chr5 | 125658160 | 125660046 | Ncor2   | ENSMUSG00000029478 | 320  | 0.2  | 0.15 | 0.13 | 0.11 | 0.11 | 0.15 |
| chr5 | 93326761  | 93327354  | Shroom3 | ENSMUSG00000029381 | 38   | 0.2  | 0.08 | 0.08 | 0.16 | 0.07 | 0.14 |
| chr5 | 25003525  | 25005839  | MI3     | ENSMUSG00000038056 | -162 | 0.2  | 0.15 | 0.11 | 0.15 | 0.14 | 0.16 |
| chr5 | 112656410 | 112656823 | Miat    | ENSMUSG00000086878 | 1352 | 1    | 0.1  | 0.09 | 0.15 | 0.09 | 0.22 |
| chr5 | 149363756 | 149364558 | Ubl3    | ENSMUSG0000001687  | 207  | 0.2  | 0.09 | 0.1  | 0.12 | 0.12 | 0.12 |
| chr5 | 72559061  | 72559452  | Commd8  | ENSMUSG00000029213 | 166  | 0.14 | 0.13 | 0.19 | 0.24 | 0.6  | 0.21 |
| chr5 | 90794266  | 90794671  | Ankrd17 | ENSMUSG00000055204 | 605  | 0.41 | 0.18 | 0.3  | 0.36 | 0.12 | 0.34 |
| chr5 | 53980234  | 53981783  | Rbpj    | ENSMUSG00000039191 | -446 | 0.21 | 0.17 | 0.1  | 0.12 | 0.1  | 0.15 |
| chr5 | 34959324  | 34959530  | Add1    | ENSMUSG00000029106 | 152  | 0.84 | 0.85 | 0.9  | 0.9  | 0.96 | 0.96 |
| chr5 | 65498592  | 65499361  | Kihl5   | ENSMUSG00000054920 | 169  | 0.33 | 0.31 | 0.13 | 0.25 | 0.17 | 0.17 |
| chr5 | 97820985  | 97821420  | Naa11   | ENSMUSG00000046000 | 147  | 0.9  | 0.94 | 0.95 | 0.95 | 0.96 | 0.97 |
| chr5 | 121098707 | 121099554 | Rasal1  | ENSMUSG00000029602 | 309  | 0.23 | 0.3  | 0.13 | 0.2  | 0.33 | 0.15 |
| chr5 | 136592335 | 136592859 | Polr2j  | ENSMUSG00000039771 | 96   | 0.38 | 0.19 | 0.14 | 0.14 | 0.15 | 0.12 |
| chr5 | 135164092 | 135165009 | Limk1   | ENSMUSG00000029674 | -106 | 0.18 | 0.15 | 0.1  | 0.16 | 0.1  | 0.16 |
| chr5 | 3543730   | 3544210   | Fam133b | ENSMUSG00000058503 | 126  | 0.15 | 0.08 | 0.08 | 0.07 | 0.05 | 0.1  |
| chr5 | 109987598 | 109988220 | Crf2    | ENSMUSG00000033467 | 46   | 0.36 | 0.11 | 0.13 | 0.12 | 0.13 | 0.18 |
| chr5 | 111308589 | 111309328 | Ttc28   | ENSMUSG00000033209 | 136  | 0.16 | 0.21 | 0.18 | 0.18 | 0.08 | 0.23 |
| chr5 | 135553646 | 135554446 | Vps37d  | ENSMUSG00000043614 | 90   | 0.4  | 0.26 | 0.14 | 0.15 | 0.21 | 0.16 |

|      |           |           |               |                    |      |      |      |      |      |      |      |
|------|-----------|-----------|---------------|--------------------|------|------|------|------|------|------|------|
| chr5 | 31999812  | 32000612  | Rbks          | ENSMUSG00000029136 | -212 | 0.23 | 0.2  | 0.11 | 0.17 | 0.14 | 0.11 |
| chr5 | 93032003  | 93032600  | Stbd1         | ENSMUSG00000047963 | 224  | 0.14 | 0.11 | 0.08 | 0.1  | 0.67 | 0.08 |
| chr5 | 114443156 | 114444032 | Ssh1          | ENSMUSG00000042121 | 182  | 0.19 | 0.14 | 0.11 | 0.11 | 0.06 | 0.18 |
| chr5 | 125342003 | 125344084 | Ccdc92        | ENSMUSG00000037979 | -788 | 0.14 | 0.14 | 0.09 | 0.14 | 0.09 | 0.13 |
| chr5 | 139605446 | 139605674 | Prkar1b       | ENSMUSG00000025855 | 153  | 0.22 | 0.14 | 0.09 | 0.07 | 0.07 | 0.09 |
| chr5 | 8622267   | 8623253   | Rundc3b       | ENSMUSG00000040570 | 192  | 0.37 | 0.09 | 0.08 | 0.13 | 0.12 | 0.19 |
| chr5 | 37379774  | 37380663  | Wfs1          | ENSMUSG00000039474 | -46  | 1    | 1    | 0.12 | 0.18 | 0.25 | 0.15 |
| chr5 | 67651718  | 67652584  | Tmem33        | ENSMUSG00000037720 | 347  | 0.16 | 0.14 | 0.11 | 0.19 | 0.07 | 0.15 |
| chr5 | 108863012 | 108863521 | Atp5k         | ENSMUSG00000050856 | 150  | 0.48 | 0.2  | 0.11 | 0.22 | 0.19 | 0.17 |
| chr5 | 136409968 | 136410578 | Ywhag         | ENSMUSG00000051391 | 147  | 0.47 | 0.5  | 0.08 | 0.23 | 0.17 | 0.12 |
| chr5 | 28536129  | 28536927  | Cnpy1         | ENSMUSG00000044681 | 34   | 0.15 | 0.09 | 0.08 | 0.14 | 0.08 | 0.15 |
| chr5 | 136720274 | 136720806 | Sh2b2         | ENSMUSG00000005057 | 233  | 1    | 0.4  | 0.17 | 0.28 | 0.4  | 0.17 |
| chr5 | 9161033   | 9162025   | Dmtf1         | ENSMUSG00000042508 | 189  | 0.11 | 0.12 | 0.09 | 0.15 | 0.07 | 0.09 |
| chr5 | 115392223 | 115392447 | 2210016L21Rik | ENSMUSG00000029559 | 95   | 0.87 | 0.59 | 0.41 | 0.53 | 0.2  | 0.3  |
| chr5 | 116015132 | 116015748 | Gcn11l        | ENSMUSG00000041638 | 177  | 0.19 | 0.09 | 0.08 | 0.14 | 0.1  | 0.12 |
| chr5 | 65361176  | 65361677  | Fam114a1      | ENSMUSG00000029185 | 116  | 0.19 | 0.28 | 0.19 | 0.21 | 0.37 | 0.28 |
| chr5 | 76374135  | 76374682  | Kdr           | ENSMUSG00000062960 | 45   | 0.11 | 0.21 | 0.1  | 0.11 | 0.05 | 0.14 |
| chr5 | 102092328 | 102094782 | Nkx6-1        | ENSMUSG00000035187 | 690  | 0.21 | 0.13 | 0.09 | 0.16 | 0.16 | 0.13 |
| chr5 | 125914186 | 125914628 | Dhx37         | ENSMUSG00000029480 | 11   | 0.36 | 0.16 | 0.12 | 0.13 | 0.17 | 0.14 |
| chr5 | 20456766  | 20457894  | Rsb1l1        | ENSMUSG00000039968 | 310  | 0.2  | 0.18 | 0.1  | 0.18 | 0.07 | 0.14 |
| chr5 | 38430202  | 38430794  | Stx18         | ENSMUSG00000029125 | 26   | 0.33 | 0.12 | 0.08 | 0.19 | 0.1  | 0.12 |
| chr5 | 43623903  | 43626437  | Cpeb2         | ENSMUSG00000039782 | 468  | 0.1  | 0.11 | 0.12 | 0.13 | 0.07 | 0.12 |
| chr5 | 77523781  | 77524407  | Hopx          | ENSMUSG00000059325 | 184  | 0.35 | 0.17 | 0.13 | 0.16 | 0.13 | 0.16 |
| chr5 | 104182689 | 104183601 | Aff1          | ENSMUSG00000029313 | -36  | 0.17 | 0.18 | 0.12 | 0.15 | 0.08 | 0.11 |
| chr5 | 144165323 | 144166009 | RP23-372N19.1 | ENSMUSG00000093720 | -239 | 0.17 | 0.07 | 0.06 | 0.12 | 0.05 | 0.1  |
| chr5 | 86494193  | 86494854  | Cenpc1        | ENSMUSG00000029253 | 85   | 0.48 | 0.17 | 0.15 | 0.16 | 0.22 | 0.13 |
| chr5 | 147644451 | 147645048 | Rpl21         | ENSMUSG00000041453 | 283  | 0.27 | 0.2  | 0.12 | 0.22 | 0.13 | 0.2  |
| chr5 | 141305852 | 141306588 | Gna12         | ENSMUSG00000000149 | 80   | 0.15 | 0.13 | 0.09 | 0.11 | 0.09 | 0.12 |
| chr5 | 29895517  | 29896335  | Ube3c         | ENSMUSG00000039000 | 144  | 0.15 | 0.1  | 0.11 | 0.13 | 0.08 | 0.16 |
| chr5 | 9100472   | 9101453   | 4930420K17Rik | ENSMUSG00000079659 | 225  | 0.32 | 0.28 | 0.1  | 0.17 | 0.19 | 0.15 |

|      |           |           |          |                    |       |      |      |      |      |      |      |
|------|-----------|-----------|----------|--------------------|-------|------|------|------|------|------|------|
| chr5 | 75440061  | 75440980  | Chic2    | ENSMUSG00000029229 | 279   | 0.22 | 0.1  | 0.1  | 0.11 | 0.14 | 0.12 |
| chr5 | 139625834 | 139626805 | Prkar1b  | ENSMUSG00000025855 | -408  | 0.12 | 0.11 | 0.09 | 0.11 | 0.08 | 0.1  |
| chr5 | 140019729 | 140020895 | Uncx     | ENSMUSG00000029546 | 460   | 0.07 | 0.07 | 0.09 | 0.12 | 0.15 | 0.12 |
| chr5 | 100587814 | 100588605 | Tmem150c | ENSMUSG00000050640 | 91    | 0.27 | 0.25 | 0.16 | 0.14 | 0.15 | 0.21 |
| chr5 | 5379912   | 5380844   | Cdk14    | ENSMUSG00000028926 | -186  | 0.15 | 0.1  | 0.09 | 0.14 | 0.1  | 0.12 |
| chr5 | 27375871  | 27376411  | Dpp6     | ENSMUSG00000061576 | 402   | 0.29 | 0.35 | 0.21 | 0.33 | 0.13 | 0.23 |
| chr5 | 38952253  | 38953125  | Wdr1     | ENSMUSG00000005103 | 216   | 0.14 | 0.18 | 0.12 | 0.21 | 0.2  | 0.12 |
| chr5 | 110536031 | 110537395 | Gtpbp6   | ENSMUSG00000033434 | -492  | 0.23 | 0.18 | 0.17 | 0.2  | 0.09 | 0.14 |
| chr5 | 121902113 | 121902804 | Erp29    | ENSMUSG00000029616 | -101  | 0.05 | 0.12 | 0.1  | 0.11 | 0.18 | 0.1  |
| chr5 | 38668321  | 38669063  | Otop1    | ENSMUSG00000051596 | 49    | 0.17 | 0.16 | 0.06 | 0.15 | 0.05 | 0.17 |
| chr5 | 37187319  | 37188142  | Mrfap1   | ENSMUSG00000055302 | 281   | 0.19 | 0.24 | 0.09 | 0.14 | 0.07 | 0.22 |
| chr5 | 108741568 | 108742131 | Pigg     | ENSMUSG00000029263 | 221   | 0.37 | 0.19 | 0.12 | 0.19 | 0.13 | 0.16 |
| chr5 | 141177852 | 141178383 | lqce     | ENSMUSG00000036555 | -194  | 0.15 | 0.19 | 0.08 | 0.12 | 0.08 | 0.13 |
| chr5 | 74927163  | 74927848  | Scfd2    | ENSMUSG00000062110 | 139   | 0.78 | 0.28 | 0.09 | 0.19 | 0.33 | 0.13 |
| chr5 | 84846199  | 84846628  | Epha5    | ENSMUSG00000029245 | -149  | 0.09 | 0.06 | 0.09 | 0.08 | 0.04 | 0.07 |
| chr5 | 100844955 | 100845590 | Sec31a   | ENSMUSG00000035325 | -19   | 0.18 | 0.1  | 0.09 | 0.16 | 0.1  | 0.13 |
| chr5 | 122298803 | 122299294 | Fam109a  | ENSMUSG00000044134 | 11    | 0.08 | 0.17 | 0.1  | 0.13 | 0.16 | 0.15 |
| chr5 | 134789313 | 134790920 | Gtf2i    | ENSMUSG00000060261 | 132   | 0.2  | 0.09 | 0.09 | 0.18 | 0.12 | 0.11 |
| chr5 | 122161312 | 122163185 | Atxn2    | ENSMUSG00000042605 | 902   | 0.14 | 0.16 | 0.14 | 0.16 | 0.2  | 0.16 |
| chr5 | 135845729 | 135846215 | Nsun5    | ENSMUSG00000000916 | 149   | 0.52 | 0.4  | 0.16 | 0.14 | 0.16 | 0.2  |
| chr5 | 36826324  | 36827593  | Tada2b   | ENSMUSG00000029196 | -197  | 0.24 | 0.16 | 0.1  | 0.15 | 0.18 | 0.14 |
| chr5 | 34712229  | 34713353  | Fam193a  | ENSMUSG00000037210 | -271  | 0.14 | 0.15 | 0.09 | 0.15 | 0.09 | 0.13 |
| chr5 | 110973169 | 110973902 | Galnt9   | ENSMUSG00000033316 | 171   | 0.16 | 0.21 | 0.09 | 0.12 | 0.07 | 0.09 |
| chr5 | 123349503 | 123350761 | Kdm2b    | ENSMUSG00000029475 | 232   | 0.17 | 0.14 | 0.1  | 0.15 | 0.09 | 0.15 |
| chr5 | 133017463 | 133019983 | Auts2    | ENSMUSG00000029673 | -1030 | 0.2  | 0.17 | 0.12 | 0.13 | 0.11 | 0.17 |
| chr5 | 137462734 | 137463714 | Znhit1   | ENSMUSG00000059518 | -453  | 0.2  | 0.13 | 0.11 | 0.2  | 0.12 | 0.17 |
| chr5 | 139473170 | 139473685 | Pdgfra   | ENSMUSG00000025856 | -103  | 0.39 | 0.24 | 0.32 | 0.47 | 0.24 | 0.31 |
| chr5 | 148768763 | 148769582 | Mtus2    | ENSMUSG00000029651 | 276   | 0.23 | 0.25 | 0.12 | 0.16 | 0.14 | 0.11 |
| chr5 | 24256580  | 24256979  | Crygn    | ENSMUSG00000038135 | 363   | 0.25 | 0.58 | 0.13 | 0.19 | 1    | 0.19 |
| chr5 | 145726059 | 145727111 | Smurf1   | ENSMUSG00000038780 | 123   | 0.12 | 0.13 | 0.07 | 0.13 | 0.07 | 0.12 |

|      |           |           |               |                    |      |      |      |      |      |      |      |
|------|-----------|-----------|---------------|--------------------|------|------|------|------|------|------|------|
| chr5 | 141082931 | 141083813 | Lfng          | ENSMUSG00000029570 | 77   | 0.31 | 0.2  | 0.1  | 0.27 | 0.15 | 0.16 |
| chr5 | 98682893  | 98683689  | Fgf5          | ENSMUSG00000029337 | 88   | 0.14 | 0.24 | 0.09 | 0.15 | 0.23 | 0.15 |
| chr5 | 31543119  | 31543655  | Nrbp1         | ENSMUSG00000029148 | 150  | 0.13 | 0.1  | 0.09 | 0.16 | 0.05 | 0.1  |
| chr5 | 64359591  | 64360375  | Rel1          | ENSMUSG00000047881 | 78   | 0.17 | 0.12 | 0.1  | 0.11 | 0.1  | 0.15 |
| chr5 | 147042463 | 147043460 | Cdk8          | ENSMUSG00000029635 | 155  | 0.19 | 0.12 | 0.09 | 0.14 | 0.13 | 0.17 |
| chr5 | 117737315 | 117737731 | Pebp1         | ENSMUSG00000032959 | 11   | 0.43 | 0.22 | 0.11 | 0.14 | 0.11 | 0.11 |
| chr5 | 139800946 | 139801276 | Adap1         | ENSMUSG00000056413 | 307  | 0.18 | 0.19 | 0.1  | 0.13 | 0.1  | 0.17 |
| chr5 | 102193814 | 102194688 | Cds1          | ENSMUSG00000029330 | 102  | 0.2  | 0.12 | 0.09 | 0.1  | 0.12 | 0.15 |
| chr5 | 143177921 | 143178496 | Slc29a4       | ENSMUSG00000050822 | 153  | 0.25 | 0.2  | 0.12 | 0.12 | 0.16 | 0.14 |
| chr5 | 115222819 | 115225363 | Gil2          | ENSMUSG00000041890 | -648 | 0.2  | 0.14 | 0.09 | 0.11 | 0.14 | 0.14 |
| chr5 | 128112562 | 128113127 | Gilt1d1       | ENSMUSG00000049971 | 212  | 0.71 | 0.65 | 0.22 | 0.57 | 0.4  | 0.26 |
| chr5 | 114221165 | 114223118 | Sart3         | ENSMUSG00000018974 | -483 | 0.14 | 0.15 | 0.1  | 0.17 | 0.1  | 0.13 |
| chr5 | 144076446 | 144077266 | E130309D02Rik | ENSMUSG00000039244 | -113 | 0.13 | 0.09 | 0.09 | 0.15 | 0.06 | 0.17 |
| chr5 | 145015907 | 145016832 | Bri3          | ENSMUSG00000047843 | 275  | 0.17 | 0.26 | 0.12 | 0.17 | 0.23 | 0.18 |
| chr5 | 122821721 | 122822707 | Gpn3          | ENSMUSG00000029464 | 329  | 0.1  | 0.1  | 0.09 | 0.14 | 0.07 | 0.18 |
| chr5 | 138125389 | 138126259 | Agfg2         | ENSMUSG00000029722 | 84   | 0.27 | 0.18 | 0.1  | 0.16 | 0.1  | 0.14 |
| chr5 | 33721100  | 33721649  | 4933407H18Rik | ENSMUSG00000037355 | 174  | 0.14 | 0.2  | 0.15 | 0.15 | 0.04 | 0.14 |
| chr5 | 24347687  | 24349072  | Rheb          | ENSMUSG00000028945 | -133 | 0.46 | 0.32 | 0.09 | 0.12 | 0.21 | 0.15 |
| chr5 | 31597828  | 31598306  | Fndc4         | ENSMUSG00000038552 | 177  | 0.11 | 0.1  | 0.08 | 0.15 | 0.06 | 0.1  |
| chr5 | 139676325 | 139677230 | Sun1          | ENSMUSG00000036817 | 186  | 0.29 | 0.33 | 0.14 | 0.19 | 0.19 | 0.14 |
| chr5 | 147887786 | 147889364 | Lnx2          | ENSMUSG00000016520 | -413 | 0.16 | 0.12 | 0.14 | 0.19 | 0.31 | 0.12 |
| chr5 | 30399765  | 30400224  | Tyms          | ENSMUSG00000025747 | 68   | 0.5  | 0.35 | 0.35 | 0.27 | 0.12 | 0.23 |
| chr5 | 31209750  | 31210331  | Ost4          | ENSMUSG00000038803 | 58   | 0.14 | 0.08 | 0.11 | 0.17 | 0.08 | 0.19 |
| chr5 | 130384297 | 130384804 | 4930579G22Rik | ENSMUSG00000025535 | 140  | 0.58 | 0.47 | 0.15 | 0.18 | 0.31 | 0.17 |
| chr5 | 48763570  | 48763809  | Pacrgl        | ENSMUSG00000029089 | 58   | 0.08 | 0.25 | 0.09 | 0.16 | 0.19 | 0.13 |
| chr5 | 130505124 | 130505385 | Crcp          | ENSMUSG00000025532 | 94   | 0.08 | NA   | 0.19 | 0.17 | 0.16 | 0.14 |
| chr5 | 147760068 | 147760599 | Gtf3a         | ENSMUSG00000016503 | 100  | 0.4  | NA   | 0.07 | 0.24 | 0.08 | 0.15 |
| chr5 | 34124881  | 34125532  | Letm1         | ENSMUSG00000005299 | 180  | 0.1  | 0.11 | 0.15 | 0.14 | 0.07 | 0.12 |
| chr5 | 114723653 | 114724431 | Foxn4         | ENSMUSG00000042002 | -331 | 0.14 | 0.25 | 0.12 | 0.14 | 0.08 | 0.19 |
| chr5 | 24413694  | 24414881  | Prkag2        | ENSMUSG00000028944 | -19  | 0.23 | 0.13 | 0.18 | 0.2  | 0.16 | 0.17 |

|      |           |           |               |                    |      |      |      |      |      |      |      |
|------|-----------|-----------|---------------|--------------------|------|------|------|------|------|------|------|
| chr5 | 100928897 | 100929921 | AC109196.1    | ENSMUSG00000088742 | -172 | 0.16 | 0.08 | 0.09 | 0.11 | 0.29 | 0.11 |
| chr5 | 115643364 | 115644456 | Cabp1         | ENSMUSG00000029544 | 480  | 0.2  | 0.18 | 0.1  | 0.15 | 0.13 | 0.14 |
| chr5 | 28491880  | 28493779  | En2           | ENSMUSG00000039095 | 593  | 0.13 | 0.12 | 0.11 | 0.15 | 0.09 | 0.15 |
| chr5 | 4756413   | 4758245   | Fzd1          | ENSMUSG00000044674 | 887  | 0.23 | 0.15 | 0.11 | 0.15 | 0.13 | 0.11 |
| chr5 | 115956572 | 115957065 | Pxn           | ENSMUSG00000029528 | 133  | 0.19 | 0.15 | 0.16 | 0.14 | 0.27 | 0.24 |
| chr5 | 35104230  | 35104500  | Htt           | ENSMUSG00000029104 | -24  | 0.15 | 0.41 | 0.07 | 0.4  | 0.28 | 0.19 |
| chr5 | 114830077 | 114831150 | Kctd10        | ENSMUSG0000001098  | -121 | 0.18 | 0.13 | 0.1  | 0.16 | 0.1  | 0.11 |
| chr5 | 116180922 | 116182869 | Ccdc64        | ENSMUSG00000041609 | -519 | 0.21 | 0.14 | 0.1  | 0.16 | 0.17 | 0.15 |
| chr5 | 127721812 | 127723218 | Tmem132c      | ENSMUSG00000034324 | 337  | 0.16 | 0.19 | 0.14 | 0.19 | 0.1  | 0.17 |
| chr5 | 134652178 | 134652696 | Wbscr16       | ENSMUSG00000061979 | 207  | 0.13 | 0.26 | 0.13 | 0.15 | 0.2  | 0.16 |
| chr5 | 139230389 | 139232051 | Fam20c        | ENSMUSG00000025854 | 752  | 0.14 | 0.12 | 0.1  | 0.16 | 0.09 | 0.12 |
| chr5 | 150921114 | 150921722 | Fry           | ENSMUSG00000056602 | 176  | 0.12 | 0.16 | 0.09 | 0.13 | 0.25 | 0.11 |
| chr5 | 31522408  | 31523376  | Ppm1g         | ENSMUSG00000029147 | 26   | 0.82 | 0.42 | 0.22 | 0.2  | 0.44 | 0.19 |
| chr5 | 117569764 | 117570806 | Taok3         | ENSMUSG00000061288 | 147  | 0.22 | 0.1  | 0.15 | 0.18 | 0.14 | 0.21 |
| chr5 | 137505895 | 137508648 | Vgf           | ENSMUSG00000037428 | 1106 | 0.12 | 0.12 | 0.09 | 0.16 | 0.09 | 0.13 |
| chr5 | 138612106 | 138613416 | Mcm7          | ENSMUSG00000029730 | -516 | 0.17 | NA   | 0.14 | 0.24 | 0.24 | 0.18 |
| chr5 | 140895155 | 140895831 | Eif3b         | ENSMUSG00000056076 | 234  | 0.16 | 0.25 | 0.12 | 0.14 | 0.31 | 0.13 |
| chr5 | 151755139 | 151756066 | Kl            | ENSMUSG00000058488 | 420  | 0.2  | 0.07 | 0.11 | 0.22 | 0.07 | 0.16 |
| chr5 | 34278503  | 34279342  | Whsc2         | ENSMUSG00000029111 | -23  | 0.19 | 0.18 | 0.08 | 0.2  | 0.13 | 0.14 |
| chr5 | 22938762  | 22940737  | 5031425E22Rik | ENSMUSG00000073147 | -12  | 0.21 | 0.29 | 0.12 | 0.24 | 0.35 | 0.18 |
| chr5 | 69731609  | 69732939  | AC107770.1    | ENSMUSG00000093129 | 252  | 0.29 | 0.18 | 0.16 | 0.17 | 0.21 | 0.13 |
| chr5 | 72978213  | 72978847  | Gm5868        | ENSMUSG00000060204 | 259  | 0.27 | 0.33 | 0.13 | 0.3  | 0.16 | 0.16 |
| chr5 | 75471503  | 75472158  | Gsx2          | ENSMUSG00000035946 | 204  | 0.18 | 0.09 | 0.13 | 0.15 | 0.08 | 0.25 |
| chr5 | 104475526 | 104476217 | Nudt9         | ENSMUSG00000029310 | 326  | 0.14 | 0.07 | 0.12 | 0.09 | 0.08 | 0.11 |
| chr5 | 143105147 | 143106043 | Wipi2         | ENSMUSG00000029578 | 99   | 0.27 | 0.1  | 0.11 | 0.16 | 0.16 | 0.1  |
| chr5 | 8422144   | 8423171   | Dbf4          | ENSMUSG00000002297 | -75  | 0.2  | 0.17 | 0.11 | 0.15 | 0.14 | 0.18 |
| chr5 | 23857042  | 23857702  | Kcnh2         | ENSMUSG00000038319 | 50   | 0.19 | 0.16 | 0.11 | 0.1  | 0.14 | 0.12 |
| chr5 | 67136825  | 67137627  | Limch1        | ENSMUSG00000037736 | 152  | 0.25 | 0.18 | 0.15 | 0.18 | 0.17 | 0.16 |
| chr5 | 69983249  | 69983600  | Gnpda2        | ENSMUSG00000029209 | 33   | 0.14 | 0.31 | 0.15 | 0.18 | 0.23 | 0.13 |
| chr5 | 123330327 | 123330529 | Kdm2b         | ENSMUSG00000029475 | 666  | 0.62 | 0.89 | 0.86 | 0.84 | 0.84 | 0.98 |

|      |           |           |               |                    |      |      |      |      |      |      |      |
|------|-----------|-----------|---------------|--------------------|------|------|------|------|------|------|------|
| chr5 | 142939767 | 142940230 | C330006K01Rik | ENSMUSG00000039623 | 113  | 0.32 | 0.26 | 0.11 | 0.23 | 0.15 | 0.16 |
| chr5 | 30062241  | 30062997  | Gm5129        | ENSMUSG00000053121 | -143 | 0.24 | 0.24 | 0.11 | 0.18 | 0.1  | 0.15 |
| chr5 | 87233056  | 87233953  | Ythdc1        | ENSMUSG00000035851 | 258  | 0.08 | 0.14 | 0.08 | 0.16 | 0.05 | 0.13 |
| chr5 | 113005551 | 113006500 | Sez6l         | ENSMUSG00000058153 | 172  | 0.15 | 0.21 | 0.1  | 0.18 | 0.11 | 0.14 |
| chr5 | 124895300 | 124896199 | Setd8         | ENSMUSG00000049327 | 247  | 0.12 | 0.14 | 0.1  | 0.1  | 0.09 | 0.15 |
| chr5 | 145306263 | 145307633 | Nptx2         | ENSMUSG00000059991 | 192  | 0.16 | 0.14 | 0.11 | 0.19 | 0.11 | 0.2  |
| chr5 | 31495059  | 31496151  | Eif2b4        | ENSMUSG00000029145 | -233 | 0.2  | 0.12 | 0.15 | 0.18 | 0.15 | 0.2  |
| chr5 | 52957087  | 52957637  | Lgi2          | ENSMUSG00000039252 | 122  | 0.12 | 0.12 | 0.12 | 0.07 | 0.33 | 0.15 |
| chr5 | 65193877  | 65195552  | Klf3          | ENSMUSG00000029178 | 86   | 0.17 | 0.14 | 0.09 | 0.15 | 0.13 | 0.11 |
| chr5 | 101102823 | 101103340 | Coq2          | ENSMUSG00000029319 | 94   | 0.57 | 0.13 | 0.16 | 0.13 | 0.25 | 0.18 |
| chr5 | 107003336 | 107003964 | Zfp644        | ENSMUSG00000049606 | 84   | 0.33 | 0.24 | 0.17 | 0.24 | 0.24 | 0.19 |
| chr5 | 111759429 | 111760081 | Pitpnb        | ENSMUSG00000050017 | -28  | 0.18 | 0.19 | 0.19 | 0.22 | 0.13 | 0.17 |
| chr5 | 112657567 | 112658204 | Miat          | ENSMUSG00000086878 | 83   | 0.33 | 0.22 | 0.12 | 0.18 | 0.09 | 0.17 |
| chr5 | 125921676 | 125922471 | Bri3bp        | ENSMUSG00000037905 | 135  | 0.06 | 0.09 | 0.16 | 0.15 | 0.09 | 0.16 |
| chr5 | 135625001 | 135625817 | Tbl2          | ENSMUSG00000005374 | -118 | 0.24 | 0.26 | 0.11 | 0.08 | 0.1  | 0.12 |
| chr5 | 36100357  | 36101179  | Ablim2        | ENSMUSG00000029095 | 239  | 0.31 | 0.21 | 0.08 | 0.14 | 0.19 | 0.15 |
| chr5 | 67817883  | 67819396  | Gm16714       | ENSMUSG00000085339 | -280 | 0.16 | 0.26 | 0.12 | 0.17 | 0.11 | 0.14 |
| chr5 | 104937315 | 104937871 | BC005561      | ENSMUSG00000079065 | 222  | 0.27 | 0.1  | 0.09 | 0.14 | 0.09 | 0.15 |
| chr5 | 117565548 | 117566166 | Suds3         | ENSMUSG00000066900 | 145  | 0.13 | 0.11 | 0.09 | 0.12 | 0.09 | 0.12 |
| chr5 | 124889830 | 124890397 | Setd8         | ENSMUSG00000049327 | 174  | 0.5  | 0.36 | 0.13 | 0.24 | 0.27 | 0.2  |
| chr5 | 125869598 | 125870470 | Gm10382       | ENSMUSG00000072612 | 342  | 0.5  | 1    | 0.11 | 0.15 | 0.23 | 0.17 |
| chr5 | 150480709 | 150481467 | B3galt1       | ENSMUSG00000051950 | 283  | 0.17 | 0.25 | 0.1  | 0.16 | 0.13 | 0.12 |
| chr5 | 72092049  | 72092457  | Gabrb1        | ENSMUSG00000029212 | 1082 | 0.22 | 0.18 | 0.14 | 0.14 | 0.11 | 0.17 |
| chr5 | 110714957 | 110715544 | Pxmp2         | ENSMUSG00000029499 | -229 | 0.12 | 0.36 | 0.09 | 0.14 | 0.17 | 0.16 |
| chr5 | 114893769 | 114894491 | Mmab          | ENSMUSG00000029575 | -139 | 0.33 | 0.16 | 0.21 | 0.14 | 0.2  | 0.18 |
| chr5 | 151476157 | 151477080 | Pds5b         | ENSMUSG00000034021 | 304  | 0.09 | 0.09 | 0.11 | 0.14 | 0.05 | 0.15 |
| chr5 | 73398084  | 73398758  | Slc10a4       | ENSMUSG00000029219 | 278  | 0.35 | 1    | 0.11 | 0.15 | 0.17 | 0.2  |
| chr5 | 137357401 | 137359112 | Emid2         | ENSMUSG00000004415 | 357  | 0.25 | 0.21 | 0.19 | 0.24 | 0.2  | 0.23 |
| chr5 | 44491763  | 44492664  | Gm16401       | ENSMUSG00000072962 | 532  | 0.1  | 0.21 | 0.07 | 0.15 | 0.14 | 0.13 |
| chr5 | 75552266  | 75552834  | Pdgfra        | ENSMUSG00000029231 | 359  | 0.47 | 0.44 | 0.21 | 0.19 | 0.25 | 0.28 |

|      |           |           |               |                    |       |      |      |      |      |      |      |
|------|-----------|-----------|---------------|--------------------|-------|------|------|------|------|------|------|
| chr5 | 137774696 | 137775318 | Slc12a9       | ENSMUSG00000037344 | -182  | 0.18 | 0.12 | 0.19 | 0.13 | 0.38 | 0.14 |
| chr5 | 149739958 | 149740802 | Katnal1       | ENSMUSG00000041298 | -176  | 0.27 | 0.15 | 0.13 | 0.11 | 0.16 | 0.18 |
| chr5 | 36807343  | 36808170  | 2210406O10Rik | ENSMUSG00000039563 | -296  | 0.19 | 0.15 | 0.07 | 0.19 | 0.09 | 0.15 |
| chr5 | 48374206  | 48375205  | Slit2         | ENSMUSG00000031558 | 311   | 0.3  | 0.28 | 0.13 | 0.21 | 0.14 | 0.15 |
| chr5 | 74464047  | 74464792  | Usp46         | ENSMUSG00000054814 | 26    | 0.11 | 0.12 | 0.1  | 0.12 | 0.15 | 0.13 |
| chr5 | 124777610 | 124778236 | Mphosph9      | ENSMUSG00000038126 | -65   | 0.12 | 0.08 | 0.09 | 0.16 | 0.07 | 0.16 |
| chr5 | 28790982  | 28791980  | Gm17493       | ENSMUSG00000091169 | -1433 | 0.36 | 0.29 | 0.17 | 0.2  | 0.22 | 0.12 |
| chr5 | 35742329  | 35742743  | A930033C23Rik | ENSMUSG00000093526 | 132   | 0.28 | 0.25 | 0.21 | 0.31 | 0.17 | 0.18 |
| chr5 | 72950269  | 72951162  | Nfxl1         | ENSMUSG00000072889 | -64   | 0.23 | 0.23 | 0.08 | 0.16 | 0.09 | 0.18 |
| chr5 | 73797411  | 73797825  | Cwh43         | ENSMUSG00000029154 | 151   | 0.11 | 0.08 | 0.09 | 0.12 | 0.07 | 0.13 |
| chr5 | 92863569  | 92864335  | Nup54         | ENSMUSG00000034826 | -380  | 0.2  | 0.14 | 0.14 | 0.19 | 0.09 | 0.19 |
| chr5 | 122608015 | 122608745 | Ppp1cc        | ENSMUSG0000004455  | 93    | 0.08 | 0.1  | 0.2  | 0.25 | 0.15 | 0.12 |
| chr5 | 122872134 | 122872942 | Anapc7        | ENSMUSG00000029466 | 85    | 0.13 | 0.19 | 0.08 | 0.12 | 0.07 | 0.19 |
| chr5 | 124699224 | 124700246 | Pitpnm2       | ENSMUSG00000029406 | -275  | 0.11 | 0.14 | 0.09 | 0.12 | 0.08 | 0.14 |
| chr5 | 140383880 | 140385222 | Elfn1         | ENSMUSG00000048988 | 654   | 0.18 | 0.23 | 0.12 | 0.19 | 0.24 | 0.23 |
| chr5 | 22251800  | 22252368  | Lhfpl3        | ENSMUSG00000058361 | 73    | 0.18 | 0.24 | 0.11 | 0.16 | 0.1  | 0.13 |
| chr5 | 32435376  | 32435970  | Gm10463       | ENSMUSG00000073058 | -132  | 0.2  | 0.18 | 0.12 | 0.12 | 0.09 | 0.12 |
| chr5 | 35291953  | 35292562  | Rgs12         | ENSMUSG00000029101 | 163   | 0.23 | 0.21 | 0.17 | 0.16 | 0.13 | 0.13 |
| chr5 | 73646643  | 73648083  | Fryl          | ENSMUSG00000070733 | 301   | 0.19 | 0.14 | 0.1  | 0.12 | 0.15 | 0.11 |
| chr5 | 115263713 | 115264159 | 1500011B03Rik | ENSMUSG00000092279 | 18    | 1    | 1    | 0.15 | 0.59 | 0.08 | 0.23 |
| chr5 | 115750395 | 115751218 | Dynll1        | ENSMUSG00000009013 | 82    | 0.19 | 0.34 | 0.11 | 0.17 | 0.12 | 0.17 |
| chr5 | 31116875  | 31117422  | Mapre3        | ENSMUSG00000029166 | 134   | 0.21 | 0.16 | 0.1  | 0.09 | 0.12 | 0.11 |
| chr5 | 34162535  | 34164363  | Whsc1         | ENSMUSG00000057406 | 75    | 0.15 | 0.12 | 0.09 | 0.14 | 0.12 | 0.14 |
| chr5 | 40035641  | 40036141  | Hs3st1        | ENSMUSG00000051022 | -55   | 0.08 | 0.21 | 0.12 | 0.19 | 0.13 | 0.12 |
| chr5 | 72971529  | 72972379  | Zar1          | ENSMUSG00000063935 | 369   | 0.13 | 0.26 | 0.15 | 0.18 | 0.09 | 0.11 |
| chr5 | 92706723  | 92707088  | Naaa          | ENSMUSG00000029413 | 286   | 0.07 | 0.29 | 0.11 | 0.09 | 0.13 | 0.11 |
| chr5 | 118477509 | 118479103 | Tesc          | ENSMUSG00000029359 | 554   | 0.17 | 0.15 | 0.16 | 0.14 | 0.13 | 0.15 |
| chr5 | 125507037 | 125507454 | Ncor2         | ENSMUSG00000029478 | 49    | 0.74 | 0.92 | 0.66 | 0.61 | 0.83 | 0.8  |
| chr5 | 137971981 | 137973225 | Gnb2          | ENSMUSG00000029713 | -476  | 0.15 | 0.1  | 0.1  | 0.16 | 0.08 | 0.17 |
| chr5 | 129105824 | 129107970 | 5930412G12Rik | ENSMUSG00000072591 | -368  | 0.12 | 0.13 | 0.12 | 0.18 | 0.09 | 0.14 |

|      |           |           |               |                    |      |      |      |      |      |      |      |
|------|-----------|-----------|---------------|--------------------|------|------|------|------|------|------|------|
| chr5 | 5663898   | 5664351   | A330021E22Rik | ENSMUSG00000040473 | -81  | 1    | 0.67 | 0.67 | 0.64 | 0.5  | 0.41 |
| chr5 | 30431691  | 30431999  | Fam59b        | ENSMUSG00000044576 | 144  | 0.32 | 0.22 | 0.08 | 0.26 | 0.14 | 0.12 |
| chr5 | 130006810 | 130008045 | Sfswap        | ENSMUSG00000029439 | 321  | 0.34 | 0.42 | 0.14 | 0.15 | 0.26 | 0.17 |
| chr5 | 112771879 | 112772329 | Srrd          | ENSMUSG00000029346 | -66  | 0.07 | 0.06 | 0.11 | 0.13 | 0.1  | 0.19 |
| chr5 | 114185555 | 114186027 | Ficd          | ENSMUSG00000053334 | 0    | 0.14 | 0.1  | 0.09 | 0.12 | 0.09 | 0.13 |
| chr5 | 115460694 | 115461953 | Sppl3         | ENSMUSG00000029550 | 177  | 0.1  | 0.12 | 0.1  | 0.12 | 0.14 | 0.13 |
| chr5 | 130362942 | 130363175 | Chchd2        | ENSMUSG00000070493 | 85   | 0.17 | 0.11 | 0.14 | 0.14 | 0.06 | 0.11 |
| chr5 | 33196691  | 33197056  | C330019G07Rik | ENSMUSG00000054280 | 14   | 0.38 | 0.23 | 0.15 | 0.15 | 0.19 | 0.21 |
| chr5 | 120961095 | 120961478 | Slc24a6       | ENSMUSG00000032754 | 109  | 0.16 | 1    | 0.13 | 0.11 | 0.06 | 0.08 |
| chr5 | 124423600 | 124424320 | Hip1r         | ENSMUSG00000000915 | 323  | 0.13 | 0.09 | 0.13 | 0.14 | 0.18 | 0.18 |
| chr5 | 31191116  | 31191533  | Agbl5         | ENSMUSG00000029165 | 99   | 0.12 | 0.16 | 0.08 | 0.16 | 0.2  | 0.12 |
| chr5 | 42235089  | 42235841  | Bod1l         | ENSMUSG00000061755 | -58  | 0.09 | 0.08 | 0.09 | 0.16 | 0.14 | 0.1  |
| chr5 | 77694296  | 77695996  | Rest          | ENSMUSG00000029249 | 630  | 0.16 | 0.19 | 0.11 | 0.13 | 0.2  | 0.13 |
| chr5 | 132013061 | 132014817 | Auts2         | ENSMUSG00000029673 | -99  | 0.13 | 0.15 | 0.1  | 0.15 | 0.1  | 0.14 |
| chr5 | 137748225 | 137748990 | Srrt          | ENSMUSG00000037364 | 295  | 0.15 | 0.11 | 0.09 | 0.16 | 0.1  | 0.14 |
| chr5 | 152170997 | 152171585 | 1700028E10Rik | ENSMUSG00000087548 | 7    | 0.17 | 0.14 | 0.11 | 0.19 | 0.09 | 0.14 |
| chr5 | 3595971   | 3596682   | C030048B08Rik | ENSMUSG00000040302 | -267 | 0.18 | 0.13 | 0.1  | 0.15 | 0.13 | 0.14 |
| chr5 | 23289063  | 23289585  | Pus7          | ENSMUSG00000057541 | 47   | 0.14 | 0.17 | 0.08 | 0.09 | 0.09 | 0.12 |
| chr5 | 31247679  | 31247959  | Cgref1        | ENSMUSG00000029161 | 34   | 0.22 | 0.22 | 0.1  | 0.16 | 0.16 | 0.1  |
| chr5 | 34064241  | 34066558  | Fgfr3         | ENSMUSG00000054252 | 1026 | 0.16 | 0.1  | 0.12 | 0.19 | 0.13 | 0.13 |
| chr5 | 52581192  | 52581984  | Dhx15         | ENSMUSG00000029169 | 170  | 0.23 | 0.27 | 0.13 | 0.25 | 0.17 | 0.19 |
| chr5 | 64203468  | 64203900  | 0610040J01Rik | ENSMUSG00000060512 | -50  | 0.3  | 0.41 | 0.1  | 0.17 | 0.12 | 0.21 |
| chr5 | 92566652  | 92567446  | Uso1          | ENSMUSG00000029407 | 85   | 0.18 | 0.21 | 0.07 | 0.13 | 0.24 | 0.1  |
| chr5 | 148081713 | 148082204 | Pdx1          | ENSMUSG00000029644 | 423  | 0.18 | 0.21 | 0.15 | 0.19 | 0.12 | 0.15 |
| chr5 | 21290455  | 21291159  | Dnajc2        | ENSMUSG00000029014 | 165  | 0.2  | 0.23 | 0.1  | 0.15 | 0.11 | 0.12 |
| chr5 | 77738062  | 77739881  | Noa1          | ENSMUSG00000036285 | -71  | 0.1  | 0.1  | 0.09 | 0.18 | 0.13 | 0.15 |
| chr5 | 98758257  | 98758568  | 1700007G11Rik | ENSMUSG00000057816 | 39   | 0.12 | 0.17 | 0.12 | 0.11 | 0.05 | 0.2  |
| chr5 | 115140809 | 115141179 | Gltp          | ENSMUSG00000011884 | -77  | 0.1  | 0.1  | 0.09 | 0.11 | 0.07 | 0.12 |
| chr5 | 36740067  | 36740880  | Sorcs2        | ENSMUSG00000029093 | 283  | 0.09 | 0.07 | 0.09 | 0.15 | 0.07 | 0.15 |
| chr5 | 64484088  | 64484575  | Pgm1          | ENSMUSG00000029171 | 156  | 0.25 | 0.08 | 0.09 | 0.16 | 0.14 | 0.12 |



|      |           |           |          |                    |      |      |      |      |      |      |      |
|------|-----------|-----------|----------|--------------------|------|------|------|------|------|------|------|
| chr5 | 121160746 | 121161797 | Dbx1     | ENSMUSG00000029603 | 665  | 0.19 | 0.16 | 0.12 | 0.17 | 0.15 | 0.2  |
| chr5 | 130924864 | 130925727 | Cain1    | ENSMUSG00000060371 | 624  | 0.09 | 0.17 | 0.09 | 0.19 | 0.13 | 0.17 |
| chr5 | 144031151 | 144031784 | Zfp316   | ENSMUSG00000046658 | 234  | 0.24 | 0.19 | 0.09 | 0.12 | 0.38 | 0.16 |
| chr5 | 29804072  | 29805324  | Mnx1     | ENSMUSG0000001566  | 312  | 0.14 | 0.18 | 0.1  | 0.16 | 0.12 | 0.13 |
| chr5 | 97426071  | 97427129  | Bmp2k    | ENSMUSG00000034663 | -108 | 0.14 | 0.17 | 0.08 | 0.15 | 0.11 | 0.11 |
| chr5 | 122841789 | 122842154 | Arcp3    | ENSMUSG00000029465 | 84   | 0.23 | 0.17 | 0.12 | 0.2  | 0.1  | 0.13 |
| chr5 | 123228890 | 123229724 | Camkk2   | ENSMUSG00000029471 | 84   | 0.1  | 0.07 | 0.07 | 0.11 | 0.07 | 0.09 |
| chr5 | 144383249 | 144383891 | Cyth3    | ENSMUSG00000018001 | 254  | 0.25 | 0.12 | 0.07 | 0.17 | 0.18 | 0.14 |
| chr5 | 147196711 | 147197169 | Wasf3    | ENSMUSG00000029636 | 379  | 0.1  | 0.19 | 0.11 | 0.12 | 0.14 | 0.17 |
| chr5 | 24728619  | 24728929  | Galnt11  | ENSMUSG00000038072 | 74   | 0.21 | 0.16 | 0.1  | 0.24 | 0.11 | 0.17 |
| chr5 | 76612820  | 76613549  | Tmem165  | ENSMUSG00000029234 | 279  | 0.09 | 0.08 | 0.09 | 0.17 | 0.07 | 0.09 |
| chr5 | 101249562 | 101250065 | Fam175a  | ENSMUSG00000035234 | 146  | 0.13 | 0.08 | 0.09 | 0.13 | 0.09 | 0.12 |
| chr5 | 105844460 | 105845321 | Lrrc8b   | ENSMUSG00000070639 | 96   | 0.25 | 0.26 | 0.13 | 0.15 | 0.2  | 0.15 |
| chr5 | 140807660 | 140807964 | Nudt1    | ENSMUSG00000036639 | -2   | 0.23 | 0.17 | 0.11 | 0.11 | 0.17 | 0.15 |
| chr5 | 148117712 | 148118928 | Cdx2     | ENSMUSG00000029646 | 526  | 0.16 | 0.14 | 0.13 | 0.11 | 0.12 | 0.16 |
| chr5 | 34916061  | 34916831  | Add1     | ENSMUSG00000029106 | 133  | 0.16 | 0.08 | 0.08 | 0.11 | 0.11 | 0.13 |
| chr5 | 37259614  | 37261436  | Ppp2r2c  | ENSMUSG00000029120 | 773  | 0.12 | 0.16 | 0.12 | 0.12 | 0.1  | 0.12 |
| chr5 | 115279005 | 115279250 | Gm13819  | ENSMUSG00000082052 | 97   | 0.91 | 0.89 | 0.9  | 0.92 | 1    | 1    |
| chr5 | 141180386 | 141181191 | Baat1    | ENSMUSG0000000148  | -177 | 0.53 | 1    | 0.12 | 0.34 | 0.35 | 0.21 |
| chr5 | 23929308  | 23929618  | Cdk5     | ENSMUSG00000028969 | -115 | 0.14 | 0.33 | 0.16 | 0.14 | 0.5  | 0.25 |
| chr5 | 53060652  | 53061051  | Sepsecs  | ENSMUSG00000029173 | 3    | 0.09 | 0.14 | 0.11 | 0.13 | 0.14 | 0.11 |
| chr5 | 92471415  | 92472115  | Cdkl2    | ENSMUSG00000029403 | -67  | 0.07 | 0.05 | 0.1  | 0.13 | 0.14 | 0.2  |
| chr5 | 110815463 | 110816341 | Fbrsl1   | ENSMUSG00000043323 | 79   | 0.23 | 0.32 | 0.16 | 0.15 | 0.35 | 0.22 |
| chr5 | 123438157 | 123438651 | Kdm2b    | ENSMUSG00000029475 | 138  | 0.08 | 0.06 | 0.08 | 0.07 | 0.04 | 0.13 |
| chr5 | 130730983 | 130731501 | Sbds     | ENSMUSG00000025337 | 33   | 0.2  | 0.4  | 0.16 | 0.26 | 0.38 | 0.3  |
| chr5 | 138882676 | 138883082 | Zfp157   | ENSMUSG00000036898 | 183  | 0.16 | 1    | 0.14 | 0.17 | 0.09 | 0.15 |
| chr5 | 145962318 | 145962810 | Zkscan14 | ENSMUSG00000029627 | 162  | 0.17 | 0.56 | 0.18 | 0.2  | 0.47 | 0.27 |
| chr5 | 44617198  | 44618689  | Tapt1    | ENSMUSG00000046985 | -98  | 0.15 | 0.21 | 0.1  | 0.15 | 0.12 | 0.12 |
| chr5 | 105909878 | 105910249 | Lrrc8b   | ENSMUSG00000070639 | 1254 | 0.82 | 0.84 | 0.91 | 0.88 | 0.86 | 0.94 |
| chr5 | 107866804 | 107867224 | Btbd8    | ENSMUSG00000070632 | -2   | 0.18 | 0.07 | 0.07 | 0.12 | 0.13 | 0.08 |

|      |           |           |               |                    |      |      |      |      |      |      |      |
|------|-----------|-----------|---------------|--------------------|------|------|------|------|------|------|------|
| chr5 | 124980607 | 124981491 | Rilpl1        | ENSMUSG00000029392 | 351  | 0.14 | 0.11 | 0.1  | 0.14 | 0.1  | 0.14 |
| chr5 | 23953539  | 23953796  | Tmub1         | ENSMUSG00000028958 | -58  | 0.13 | 0.09 | 0.08 | 0.12 | 0.07 | 0.12 |
| chr5 | 42098978  | 42099526  | Rab28         | ENSMUSG00000029128 | 142  | 0.08 | 0.15 | 0.15 | 0.13 | 0.13 | 0.2  |
| chr5 | 77380081  | 77381047  | Ppat          | ENSMUSG00000029246 | -374 | 0.13 | 0.15 | 0.07 | 0.15 | 0.08 | 0.14 |
| chr5 | 91360146  | 91360471  | Mthfd2l       | ENSMUSG00000029376 | 86   | 0.08 | 0.07 | 0.07 | 0.1  | 0.05 | 0.09 |
| chr5 | 108978460 | 108979121 | Cplx1         | ENSMUSG00000033615 | 229  | 0.1  | 0.24 | 0.12 | 0.14 | 0.15 | 0.16 |
| chr5 | 110530360 | 110530938 | Plcxd1        | ENSMUSG00000064247 | 426  | 0.13 | 0.2  | 0.12 | 0.18 | 0.08 | 0.17 |
| chr5 | 111081828 | 111083117 | Noc4l         | ENSMUSG00000033294 | -194 | 0.28 | 0.21 | 0.11 | 0.15 | 0.16 | 0.21 |
| chr5 | 115879304 | 115880976 | Msi1          | ENSMUSG00000054256 | 532  | 0.13 | 0.13 | 0.11 | 0.17 | 0.15 | 0.12 |
| chr5 | 135499255 | 135499932 | Stx1a         | ENSMUSG00000007207 | 241  | 0.15 | 0.33 | 0.11 | 0.14 | 0.09 | 0.21 |
| chr5 | 135869753 | 135870489 | Pom121        | ENSMUSG00000053293 | 259  | 0.13 | 0.16 | 0.1  | 0.17 | 0.09 | 0.11 |
| chr5 | 144090632 | 144091033 | Zdhhc4        | ENSMUSG00000001844 | 36   | 0.23 | 0.21 | 0.11 | 0.19 | 0.13 | 0.21 |
| chr5 | 145992309 | 145993144 | Zfp655        | ENSMUSG00000007812 | 134  | 0.2  | 0.32 | 0.12 | 0.2  | 0.15 | 0.2  |
| chr5 | 148000187 | 148001027 | Gsx1          | ENSMUSG00000053129 | 335  | 0.1  | 0.14 | 0.1  | 0.13 | 0.12 | 0.13 |
| chr5 | 17865550  | 17866566  | Gnai1         | ENSMUSG00000057614 | 173  | 0.1  | 0.15 | 0.08 | 0.14 | 0.2  | 0.13 |
| chr5 | 20207693  | 20208620  | Magi2         | ENSMUSG00000073174 | 61   | 0.21 | 0.16 | 0.15 | 0.17 | 0.15 | 0.12 |
| chr5 | 144670315 | 144671164 | Aimp2         | ENSMUSG00000029610 | -86  | 0.19 | 0.2  | 0.12 | 0.12 | 0.14 | 0.21 |
| chr5 | 28397515  | 28398334  | Gm16719       | ENSMUSG00000085535 | -279 | 0.1  | 0.14 | 0.09 | 0.1  | 0.08 | 0.12 |
| chr5 | 100858211 | 100858946 | 5430416N02Rik | ENSMUSG00000084877 | -46  | 0.16 | 0.09 | 0.11 | 0.18 | 0.11 | 0.14 |
| chr5 | 151467705 | 151468267 | N4bp2l2       | ENSMUSG00000029655 | -65  | 0.21 | 0.35 | 0.13 | 0.15 | 0.34 | 0.13 |
| chr5 | 31829327  | 31830023  | Slc4a1ap      | ENSMUSG00000029141 | 307  | 0.13 | 0.09 | 0.07 | 0.14 | 0.07 | 0.13 |
| chr5 | 64040481  | 64041697  | 3110047P20Rik | ENSMUSG00000090061 | 510  | 0.24 | 0.2  | 0.1  | 0.18 | 0.19 | 0.17 |
| chr5 | 65726594  | 65727038  | Rfc1          | ENSMUSG00000029191 | -13  | 0.1  | 0.13 | 0.07 | 0.19 | 0.05 | 0.1  |
| chr5 | 89104120  | 89105493  | Grsf1         | ENSMUSG00000044221 | -589 | 0.39 | 0.35 | 0.13 | 0.21 | 0.32 | 0.15 |
| chr5 | 115017135 | 115018443 | BC057022      | ENSMUSG00000041930 | -236 | 0.13 | 0.1  | 0.1  | 0.14 | 0.11 | 0.13 |
| chr5 | 118426677 | 118427361 | Fbxo21        | ENSMUSG00000032898 | 240  | 0.25 | 0.12 | 0.12 | 0.16 | 0.21 | 0.13 |
| chr5 | 141124621 | 141124884 | Ttyh3         | ENSMUSG00000036565 | 233  | 0.15 | 0.11 | 0.07 | 0.1  | 0.12 | 0.19 |
| chr5 | 20387293  | 20388589  | Phf2          | ENSMUSG00000039987 | -78  | 0.18 | 0.15 | 0.08 | 0.1  | 0.14 | 0.11 |
| chr5 | 113739398 | 113740013 | Sgsm1         | ENSMUSG00000042216 | 12   | 0.15 | 0.07 | 0.09 | 0.15 | 0.08 | 0.08 |
| chr5 | 115729617 | 115729901 | Coq5          | ENSMUSG00000041733 | 84   | 0.12 | 0.09 | 0.07 | 0.12 | 0.07 | 0.1  |

|      |           |           |            |                    |      |      |      |      |      |      |      |
|------|-----------|-----------|------------|--------------------|------|------|------|------|------|------|------|
| chr5 | 130230799 | 130231380 | Gbas       | ENSMUSG00000029432 | 151  | 0.17 | 0.22 | 0.13 | 0.19 | 0.13 | 0.22 |
| chr5 | 144225395 | 144225735 | Daglb      | ENSMUSG00000039206 | 204  | 0.18 | 0.4  | 0.14 | 0.21 | 0.13 | 0.16 |
| chr5 | 144984304 | 144984797 | Tecpr1     | ENSMUSG00000066621 | -134 | 0.18 | 0.16 | 0.08 | 0.22 | 0.13 | 0.15 |
| chr5 | 38651512  | 38651863  | Tmem128    | ENSMUSG00000067365 | 64   | 0.14 | 0.25 | 0.12 | 0.5  | 1    | 0.26 |
| chr5 | 24104357  | 24104800  | Smarcd3    | ENSMUSG00000028949 | 178  | 0.17 | 0.13 | 0.1  | 0.1  | 0.07 | 0.17 |
| chr5 | 46060658  | 46061561  | Ncapg      | ENSMUSG00000015880 | -52  | 0.12 | 0.22 | 0.13 | 0.24 | 0.18 | 0.24 |
| chr5 | 123958244 | 123958943 | Gm15751    | ENSMUSG00000086753 | 189  | 1    | 0.19 | 0.11 | 0.19 | 0.19 | 0.14 |
| chr5 | 134659816 | 134660521 | Gtf2ird2   | ENSMUSG00000015942 | 279  | 0.08 | 0.09 | 0.12 | 0.19 | 0.1  | 0.11 |
| chr5 | 30890545  | 30891416  | Kcnk3      | ENSMUSG00000049265 | 437  | 0.14 | 0.16 | 0.09 | 0.19 | 0.17 | 0.13 |
| chr5 | 30481354  | 30482244  | Hadha      | ENSMUSG00000025745 | -297 | 1    | 1    | 0.1  | 0.15 | 0.2  | 0.17 |
| chr5 | 34000226  | 34001484  | Tmem129    | ENSMUSG00000019295 | -350 | 1    | 0.04 | 0.17 | 0.14 | 0.17 | 0.3  |
| chr5 | 92511892  | 92512984  | G3bp2      | ENSMUSG00000029405 | -495 | 0.19 | 0.1  | 0.12 | 0.13 | 0.16 | 0.17 |
| chr5 | 121995115 | 121996057 | Mapkapk5   | ENSMUSG00000029454 | -377 | 0.19 | 0.36 | 0.1  | 0.15 | 0.12 | 0.13 |
| chr5 | 145844570 | 145844944 | Arpc1a     | ENSMUSG00000029621 | 58   | 0.25 | 0.17 | 0.08 | 0.15 | 0.11 | 0.23 |
| chr5 | 37086714  | 37087578  | D5Ertd579e | ENSMUSG00000029190 | 74   | 0.21 | 0.2  | 0.08 | 0.13 | 0.18 | 0.18 |
| chr5 | 75970845  | 75972030  | Kit        | ENSMUSG00000005672 | 496  | 0.14 | 0.44 | 0.15 | 0.18 | 0.24 | 0.1  |
| chr5 | 89315589  | 89316775  | Slc4a4     | ENSMUSG00000060961 | 339  | 0.33 | 0.24 | 0.12 | 0.18 | 0.29 | 0.13 |
| chr5 | 116009272 | 116010087 | Rplp0      | ENSMUSG00000067274 | 203  | 0.17 | 0.21 | 0.1  | 0.13 | 0.21 | 0.21 |
| chr5 | 25211375  | 25211720  | Xrcc2      | ENSMUSG00000028933 | 35   | 0.24 | 0.11 | 0.11 | 0.16 | 0.12 | 0.11 |
| chr5 | 123464852 | 123465814 | Orai1      | ENSMUSG00000049686 | 250  | 0.08 | 0.13 | 0.1  | 0.14 | 0.06 | 0.14 |
| chr5 | 125002558 | 125003199 | Ddx55      | ENSMUSG00000029389 | 5    | 0.14 | 0.2  | 0.09 | 0.17 | 0.09 | 0.15 |
| chr5 | 149995689 | 149996691 | Usp11      | ENSMUSG00000041264 | 264  | 0.19 | 1    | 0.21 | 0.2  | 1    | 0.31 |
| chr5 | 5559359   | 5559621   | Gtpbp10    | ENSMUSG00000040464 | -29  | 0.22 | 0.15 | 0.08 | 0.11 | 0.17 | 0.15 |
| chr5 | 31440421  | 31440998  | Ucn        | ENSMUSG00000038676 | 493  | 0.5  | 0.16 | 0.15 | 0.25 | 0.31 | 0.24 |
| chr5 | 100927334 | 100927881 | Lin54      | ENSMUSG00000035310 | -65  | 0.14 | 0.14 | 0.11 | 0.21 | 0.1  | 0.21 |
| chr5 | 114550119 | 114550739 | Usp30      | ENSMUSG00000029592 | 87   | 0.15 | 0.21 | 0.1  | 0.16 | 0.12 | 0.13 |
| chr5 | 140211884 | 140212328 | Micall2    | ENSMUSG00000036718 | 181  | 0.15 | 0.11 | 0.09 | 0.15 | 0.12 | 0.18 |
| chr5 | 143667255 | 143668525 | Actb       | ENSMUSG00000029580 | -390 | 0.25 | 0.22 | 0.11 | 0.2  | 0.21 | 0.18 |
| chr5 | 120881820 | 120882480 | Lhx5       | ENSMUSG00000029595 | 371  | 0.08 | 0.1  | 0.11 | 0.12 | 0.06 | 0.11 |
| chr5 | 91568453  | 91568868  | Areg       | ENSMUSG00000029378 | 19   | 0.16 | 0.1  | 0.1  | 0.12 | 0.11 | 0.14 |

|      |           |           |               |                    |       |      |      |      |      |      |      |
|------|-----------|-----------|---------------|--------------------|-------|------|------|------|------|------|------|
| chr5 | 99466164  | 99466454  | Prkg2         | ENSMUSG00000029334 | 61    | 0.46 | 0.53 | 0.06 | 0.22 | 0.32 | 0.18 |
| chr5 | 99681471  | 99682252  | Rasgef1b      | ENSMUSG00000029333 | 85    | 0.16 | 0.17 | 0.12 | 0.15 | 0.11 | 0.13 |
| chr5 | 101148428 | 101148706 | Hpse          | ENSMUSG00000035273 | 157   | 0.8  | 1    | 0.11 | NA   | 0.4  | 0.35 |
| chr5 | 149210794 | 149211586 | Slc7a1        | ENSMUSG00000041313 | 290   | 0.16 | 0.24 | 0.08 | 0.12 | 0.1  | 0.1  |
| chr5 | 3802402   | 3803640   | Ankib1        | ENSMUSG00000040351 | 88    | 0.13 | 0.11 | 0.09 | 0.14 | 0.1  | 0.15 |
| chr5 | 34892559  | 34892788  | Sh3bp2        | ENSMUSG00000054520 | 448   | 0.21 | 0.29 | 0.09 | 0.14 | 0.11 | 0.14 |
| chr5 | 108329484 | 108330023 | Rpl5          | ENSMUSG00000058558 | 232   | 0.09 | 0.09 | 0.07 | 0.16 | 0.11 | 0.13 |
| chr5 | 123678207 | 123678494 | Psmc9         | ENSMUSG00000029440 | 151   | 0.15 | 0.12 | 0.08 | 0.15 | 0.09 | 0.13 |
| chr5 | 124380503 | 124380963 | Ccdc62        | ENSMUSG00000061882 | 35    | 0.5  | 1    | 0.18 | 0.16 | 0.34 | 0.2  |
| chr5 | 137943473 | 137944242 | Pop7          | ENSMUSG00000029715 | -204  | 0.13 | 0.17 | 0.09 | 0.2  | 0.09 | 0.12 |
| chr5 | 138219989 | 138220981 | Ppp1r35       | ENSMUSG00000029725 | 408   | 0.18 | 0.24 | 0.16 | 0.23 | 0.15 | 0.19 |
| chr5 | 23893528  | 23894248  | Atg9b         | ENSMUSG00000038295 | -104  | 0.2  | 0.33 | 0.08 | 0.25 | 0.13 | 0.06 |
| chr5 | 37139202  | 37139966  | Cno           | ENSMUSG00000060708 | 334   | 0.09 | 0.09 | 0.08 | 0.13 | 0.08 | 0.16 |
| chr5 | 90795046  | 90795913  | Ankrd17       | ENSMUSG00000055204 | -406  | 0.09 | 0.09 | 0.14 | 0.09 | 0.11 | 0.13 |
| chr5 | 130697992 | 130698535 | 0610007L01Rik | ENSMUSG00000053094 | -4    | 0.08 | 0.11 | 0.07 | 0.11 | 0.1  | 0.14 |
| chr5 | 138721098 | 138721810 | Gpc2          | ENSMUSG00000029510 | -268  | 0.33 | 0.16 | 0.11 | 0.2  | 0.07 | 0.14 |
| chr5 | 38710479  | 38711166  | Drd5          | ENSMUSG00000039358 | 74    | 0.1  | 0.3  | 0.1  | 0.2  | 0.08 | 0.07 |
| chr5 | 124357074 | 124357495 | Denr          | ENSMUSG00000023106 | 100   | 0.09 | 0.08 | 0.11 | 0.12 | 0.12 | 0.13 |
| chr5 | 138596605 | 138596839 | Zfp113        | ENSMUSG00000037007 | 206   | 0.16 | 0.23 | 0.16 | 0.15 | 0.11 | 0.14 |
| chr5 | 30950241  | 30950747  | 4930471M23Rik | ENSMUSG00000029175 | 188   | 0.2  | 0.82 | 0.12 | 0.13 | 0.09 | 0.14 |
| chr5 | 33128030  | 33128452  | Pisd          | ENSMUSG00000023452 | -11   | 0.25 | 0.27 | 0.07 | 0.12 | 0.1  | 0.18 |
| chr5 | 66651188  | 66651554  | Nsun7         | ENSMUSG00000029206 | 114   | 0.15 | 0.2  | 0.1  | 0.16 | 0.1  | 0.15 |
| chr5 | 99283766  | 99284438  | Bmp3          | ENSMUSG00000029335 | 644   | 0.11 | 0.24 | 0.09 | 0.13 | 0.15 | 0.11 |
| chr5 | 115790827 | 115791485 | Gatc          | ENSMUSG00000029536 | 31    | 0.09 | 0.05 | 0.09 | 0.12 | 0.06 | 0.12 |
| chr5 | 28117428  | 28118363  | Paxip1        | ENSMUSG0000002221  | -16   | 0.11 | 0.12 | 0.07 | 0.09 | 0.1  | 0.11 |
| chr5 | 67011421  | 67011814  | Apbb2         | ENSMUSG00000029207 | -1550 | 0.17 | 0.39 | 0.08 | 0.15 | 0.06 | 0.09 |
| chr5 | 76958330  | 76958677  | Exoc1         | ENSMUSG00000036435 | 167   | 0.33 | 0.34 | 0.21 | 0.2  | 0.19 | 0.17 |
| chr5 | 104121214 | 104122011 | Aff1          | ENSMUSG00000029313 | 219   | 0.12 | 0.24 | 0.11 | 0.21 | 0.15 | 0.11 |
| chr5 | 117768911 | 117769817 | Gm10399       | ENSMUSG00000072688 | -113  | 0.14 | 0.19 | 0.11 | 0.2  | 0.1  | 0.17 |
| chr5 | 149827071 | 149827435 | Gm15411       | ENSMUSG00000085971 | 136   | 0.16 | 0.18 | 0.13 | 0.2  | 0.24 | 0.16 |

|      |           |           |               |                    |      |      |      |      |      |      |      |
|------|-----------|-----------|---------------|--------------------|------|------|------|------|------|------|------|
| chr5 | 21207023  | 21207706  | Napepld       | ENSMUSG00000044968 | -152 | 0.31 | 0.27 | 0.12 | 0.18 | 0.25 | 0.15 |
| chr5 | 108877649 | 108877925 | Mfsd7a        | ENSMUSG00000029490 | 123  | 1    | 1    | 0.16 | 0.35 | 0.2  | 0.26 |
| chr5 | 109058422 | 109059070 | Gak           | ENSMUSG00000062234 | -304 | 1    | NA   | 0.2  | 0.38 | 0.54 | 0.15 |
| chr5 | 139060672 | 139060998 | Zfp68         | ENSMUSG00000058291 | 46   | 0.11 | 0.22 | 0.1  | 0.16 | 0.25 | 0.12 |
| chr5 | 34325773  | 34326788  | Gm1673        | ENSMUSG00000070858 | 194  | 0.15 | 0.3  | 0.12 | 0.22 | 0.28 | 0.13 |
| chr5 | 104339780 | 104340383 | Klhl8         | ENSMUSG00000029312 | 197  | 0.12 | 0.14 | 0.15 | 0.15 | 0.16 | 0.17 |
| chr5 | 121062529 | 121063482 | 1110008J03Rik | ENSMUSG00000029600 | -426 | 0.32 | 0.21 | 0.13 | 0.2  | 0.27 | 0.19 |
| chr5 | 118619190 | 118620227 | Hrk           | ENSMUSG00000046607 | -65  | 0.13 | 0.14 | 0.09 | 0.13 | 0.1  | 0.15 |
| chr5 | 23889236  | 23889547  | Gm15587       | ENSMUSG00000086769 | 9    | 0.06 | 0.1  | 0.08 | 0.06 | 0.04 | 0.16 |
| chr5 | 31796970  | 31797356  | Gpn1          | ENSMUSG00000064037 | 49   | 0.13 | 0.17 | 0.09 | 0.13 | 0.11 | 0.13 |
| chr5 | 92738580  | 92739144  | Sdad1         | ENSMUSG00000029415 | 188  | 0.19 | 0.15 | 0.12 | 0.18 | 0.24 | 0.13 |
| chr5 | 138041483 | 138042306 | Mospd3        | ENSMUSG00000037221 | 42   | 0.29 | 0.15 | 0.16 | 0.22 | 0.24 | 0.16 |
| chr5 | 23670689  | 23671157  | Nupl2         | ENSMUSG00000048439 | 142  | 0.15 | 0.21 | 0.09 | 0.18 | 0.19 | 0.09 |
| chr5 | 118604993 | 118605534 | Fbxw8         | ENSMUSG00000032867 | 204  | 0.12 | 0.07 | 0.09 | 0.14 | 0.1  | 0.14 |
| chr5 | 103853686 | 103854808 | Ptpn13        | ENSMUSG00000034573 | 36   | 0.11 | 0.09 | 0.1  | 0.15 | 0.17 | 0.14 |
| chr5 | 37419412  | 37420549  | Jakmip1       | ENSMUSG00000063646 | 406  | 0.14 | 0.11 | 0.08 | 0.13 | 0.12 | 0.14 |
| chr5 | 74042393  | 74042824  | Spata18       | ENSMUSG00000029155 | -11  | 0.09 | 0.15 | 0.1  | 0.19 | 0.06 | 0.12 |
| chr5 | 93696519  | 93697632  | Ccng2         | ENSMUSG00000029385 | 460  | 0.15 | 0.16 | 0.12 | 0.12 | 0.13 | 0.13 |
| chr5 | 140864926 | 140865423 | Snx8          | ENSMUSG00000029560 | 42   | 0.13 | 0.16 | 0.07 | 0.1  | 0.15 | 0.11 |
| chr5 | 144309543 | 144310047 | 2810453I06Rik | ENSMUSG00000048910 | 221  | 0.09 | 0.16 | 0.09 | 0.1  | 0.08 | 0.13 |
| chr5 | 24605387  | 24607035  | Prkag2        | ENSMUSG00000028944 | 249  | 0.19 | 0.15 | 0.12 | 0.14 | 0.21 | 0.17 |
| chr5 | 31171822  | 31172366  | Tmem214       | ENSMUSG00000038828 | 142  | 0.08 | 0.09 | 0.13 | 0.13 | 0.1  | 0.17 |
| chr5 | 107354760 | 107355065 | Hfm1          | ENSMUSG00000043410 | -3   | 0.37 | NA   | 0.23 | 0.33 | 0.29 | 0.29 |
| chr5 | 24031813  | 24033087  | Gbx1          | ENSMUSG00000067724 | 644  | 0.18 | 0.2  | 0.11 | 0.15 | 0.17 | 0.17 |
| chr5 | 33361064  | 33362092  | Ywhah         | ENSMUSG00000018965 | 113  | 0.11 | 0.1  | 0.08 | 0.15 | 0.09 | 0.17 |
| chr5 | 112736611 | 112737255 | Tpst2         | ENSMUSG00000029344 | -378 | 0.94 | 0.92 | 0.91 | 0.87 | 0.96 | 0.92 |
| chr5 | 124990557 | 124991549 | Tmed2         | ENSMUSG00000029390 | 349  | 0.1  | 0.19 | 0.1  | 0.12 | 0.08 | 0.13 |
| chr5 | 148706099 | 148706680 | Slc46a3       | ENSMUSG00000029650 | 2    | 0.5  | 0.18 | 0.09 | 0.17 | 0.15 | 0.17 |
| chr5 | 18732318  | 18732771  | 4921504A21Rik | ENSMUSG00000084779 | -171 | 0.23 | 0.13 | 0.09 | 0.17 | 0.19 | 0.16 |
| chr5 | 92934222  | 92934895  | Scarb2        | ENSMUSG00000029426 | 76   | 0.31 | 0.26 | 0.09 | 0.16 | 0.22 | 0.14 |

|      |           |           |               |                    |      |      |      |      |      |      |      |
|------|-----------|-----------|---------------|--------------------|------|------|------|------|------|------|------|
| chr5 | 117041350 | 117041899 | Srrm4         | ENSMUSG00000063919 | 202  | 0.22 | 0.22 | 0.11 | 0.33 | 0.17 | 0.1  |
| chr5 | 141082358 | 141082574 | Lfng          | ENSMUSG00000029570 | -829 | 0.22 | 0.14 | 0.14 | 0.14 | 0.12 | 0.13 |
| chr5 | 143721913 | 143722954 | Fscn1         | ENSMUSG00000029581 | 411  | 0.11 | 0.13 | 0.08 | 0.15 | 0.1  | 0.09 |
| chr5 | 5749058   | 5749639   | Steap1        | ENSMUSG00000015652 | -22  | 0.16 | 0.13 | 0.1  | 0.17 | 0.18 | 0.12 |
| chr5 | 31350630  | 31351082  | 0610007C21Rik | ENSMUSG00000013622 | 171  | 0.25 | 0.11 | 0.14 | 0.14 | 0.14 | 0.08 |
| chr5 | 33971664  | 33972599  | Fam53a        | ENSMUSG00000037339 | -420 | 0.22 | 0.24 | 0.1  | 0.2  | 0.17 | 0.19 |
| chr5 | 37632985  | 37633854  | Crmp1         | ENSMUSG00000029121 | 100  | 0.09 | 0.15 | 0.07 | 0.09 | 0.08 | 0.09 |
| chr5 | 38611227  | 38612047  | Zbtb49        | ENSMUSG00000029127 | -34  | 0.19 | 0.09 | 0.1  | 0.18 | 0.16 | 0.15 |
| chr5 | 100157770 | 100158276 | A930011G23Rik | ENSMUSG00000089809 | -183 | 0.1  | 0.12 | 0.12 | 0.12 | 0.07 | 0.1  |
| chr5 | 128938349 | 128938917 | Tmem132d      | ENSMUSG00000034310 | 304  | 0.08 | 0.1  | 0.09 | 0.12 | 0.09 | 0.11 |
| chr5 | 144578502 | 144579158 | Eif2ak1       | ENSMUSG00000029613 | 173  | 1    | 0.77 | 0.18 | 0.24 | 0.31 | 0.14 |
| chr5 | 89193862  | 89194488  | Dck           | ENSMUSG00000029366 | 154  | 0.18 | 0.23 | 0.12 | 0.17 | 0.2  | 0.15 |
| chr5 | 76569214  | 76569660  | Srd5a3        | ENSMUSG00000029233 | 141  | 0.11 | 0.15 | 0.11 | 0.14 | 0.13 | 0.11 |
| chr5 | 88993700  | 88993934  | Rufy3         | ENSMUSG00000029291 | -248 | 0.13 | 0.29 | 0.14 | 0.09 | 0.07 | 0.12 |
| chr5 | 96638951  | 96639332  | Mrpl1         | ENSMUSG00000029486 | 7    | 0.6  | 1    | 0.44 | 0.73 | 0.86 | 0.25 |
| chr5 | 124933118 | 124933622 | Snmp35        | ENSMUSG00000029402 | 227  | 0.13 | 0.25 | 0.11 | 0.18 | 0.1  | 0.21 |
| chr5 | 135582733 | 135583223 | Mlxipl        | ENSMUSG00000005373 | 217  | 0.17 | 0.06 | 0.09 | 0.14 | 0.13 | 0.08 |
| chr5 | 144119255 | 144119552 | Grid2ip       | ENSMUSG00000010825 | 386  | 0.14 | 0.08 | 0.16 | 0.14 | 0.08 | 0.2  |
| chr5 | 31396629  | 31396865  | Gm9924        | ENSMUSG00000053839 | -610 | 1    | 0.31 | 0.21 | 0.17 | 0.31 | 0.28 |
| chr5 | 64550595  | 64551731  | Tbc1d1        | ENSMUSG00000029174 | 473  | 0.28 | 0.18 | 0.11 | 0.14 | 0.23 | 0.17 |
| chr5 | 115932806 | 115933115 | Sirt4         | ENSMUSG00000029524 | -95  | 0.56 | 0.83 | 0.41 | 0.63 | 0.53 | 0.38 |
| chr5 | 118291802 | 118292420 | Nos1          | ENSMUSG00000029361 | -42  | 0.16 | 0.08 | 0.1  | 0.15 | 0.2  | 0.19 |
| chr5 | 125956047 | 125956531 | Aacs          | ENSMUSG00000029482 | 105  | 0.11 | 0.12 | 0.07 | 0.11 | 0.09 | 0.16 |
| chr5 | 32437295  | 32439211  | Fosl2         | ENSMUSG00000029135 | -592 | 0.21 | 0.23 | 0.15 | 0.15 | 0.2  | 0.18 |
| chr5 | 115108057 | 115108629 | Trpv4         | ENSMUSG00000014158 | 84   | 0.15 | 0.15 | 0.09 | 0.13 | 0.12 | 0.18 |
| chr5 | 140251254 | 140251691 | Ints1         | ENSMUSG00000029547 | 160  | 0.17 | 0.13 | 0.11 | 0.14 | 0.14 | 0.11 |
| chr5 | 64621334  | 64621957  | Tbc1d1        | ENSMUSG00000029174 | 107  | 0.23 | 0.26 | 0.14 | 0.24 | 0.2  | 0.25 |
| chr5 | 81450355  | 81450868  | Lphn3         | ENSMUSG00000037605 | -7   | 0.2  | 1    | 0.17 | 0.14 | 0.13 | 0.11 |
| chr5 | 139856380 | 139856972 | Gpr146        | ENSMUSG00000044197 | 141  | 0.14 | 0.36 | 0.1  | 0.11 | 0.12 | 0.12 |
| chr5 | 151325128 | 151325483 | Brca2         | ENSMUSG00000041147 | 100  | 0.12 | 0.23 | 0.08 | 0.13 | 0.15 | 0.13 |

|      |           |           |               |                    |      |      |      |      |      |      |      |
|------|-----------|-----------|---------------|--------------------|------|------|------|------|------|------|------|
| chr5 | 8660244   | 8660528   | Abcb1a        | ENSMUSG00000040584 | 309  | 1    | 0.8  | 0.15 | 0.4  | 0.35 | 0.2  |
| chr5 | 23950699  | 23951173  | Fastk         | ENSMUSG00000028959 | 68   | 0.07 | 0.08 | 0.07 | 0.1  | 0.05 | 0.11 |
| chr5 | 147606501 | 147606820 | Usp12         | ENSMUSG00000029640 | -78  | 0.5  | 0.15 | 0.26 | 0.08 | 0.63 | 0.15 |
| chr5 | 23606262  | 23607020  | Klhl7         | ENSMUSG00000028986 | 233  | 0.05 | 0.27 | 0.11 | 0.13 | 0.09 | 0.19 |
| chr5 | 124874864 | 124876171 | Sbno1         | ENSMUSG00000038095 | 60   | 0.24 | 0.3  | 0.16 | 0.2  | 0.22 | 0.2  |
| chr5 | 108494520 | 108494927 | Mtf2          | ENSMUSG00000029267 | 30   | 0.2  | 0.18 | 0.08 | 0.25 | 0.12 | 0.09 |
| chr5 | 125821176 | 125821548 | Scarb1        | ENSMUSG00000037936 | 27   | 0.14 | 0.17 | 0.09 | 0.19 | 0.06 | 0.12 |
| chr5 | 8367751   | 8368260   | Adam22        | ENSMUSG00000040537 | -23  | 0.14 | 0.11 | 0.06 | 0.25 | 0.09 | 0.14 |
| chr5 | 67697846  | 67698716  | Slc30a9       | ENSMUSG00000029221 | 87   | 0.08 | 0.17 | 0.07 | 0.13 | 0.09 | 0.14 |
| chr5 | 72894895  | 72895671  | Corin         | ENSMUSG00000005220 | 147  | 0.15 | 0.23 | 0.14 | 0.18 | 0.12 | 0.12 |
| chr5 | 137994628 | 137994951 | Actl6b        | ENSMUSG00000029712 | 44   | 0.5  | 0.08 | 0.07 | 0.25 | 0.17 | 0.09 |
| chr5 | 110564733 | 110565218 | Chfr          | ENSMUSG00000014668 | 116  | 0.22 | 0.15 | 0.12 | 0.34 | 0.16 | 0.31 |
| chr5 | 135222952 | 135223165 | Eln           | ENSMUSG00000029675 | 53   | 0.08 | 0.19 | 0.04 | 0.11 | 0.06 | 0.08 |
| chr5 | 144861115 | 144861877 | Lmtk2         | ENSMUSG00000038970 | 191  | 0.08 | 0.07 | 0.08 | 0.1  | 0.09 | 0.11 |
| chr5 | 148671953 | 148672659 | Pomp          | ENSMUSG00000029649 | 102  | 0.26 | 0.2  | 0.14 | 0.14 | 0.23 | 0.21 |
| chr5 | 36924172  | 36925119  | Tbc1d14       | ENSMUSG00000029192 | -204 | 0.15 | 0.15 | 0.14 | 0.24 | 0.09 | 0.16 |
| chr5 | 122804013 | 122804927 | Rad9b         | ENSMUSG00000038569 | -229 | 0.08 | 0.05 | 0.16 | 0.15 | 0.06 | 0.16 |
| chr5 | 35002512  | 35003693  | Nop14         | ENSMUSG00000036693 | -305 | 0.12 | 0.09 | 0.09 | 0.16 | 0.11 | 0.13 |
| chr5 | 90312173  | 90312725  | Adamts3       | ENSMUSG00000043635 | -90  | 0.15 | 0.13 | 0.11 | 0.32 | 0.17 | 0.21 |
| chr5 | 120953262 | 120953729 | Plbd2         | ENSMUSG00000029598 | 115  | 0.19 | 0.11 | 0.15 | 0.14 | 0.21 | 0.09 |
| chr5 | 65928171  | 65929243  | 1110003E01Rik | ENSMUSG00000037822 | -340 | 0.12 | 0.18 | 0.11 | 0.13 | 0.14 | 0.19 |
| chr5 | 31013745  | 31014360  | Dpysl5        | ENSMUSG00000029168 | 115  | 0.5  | 0.49 | 0.1  | 0.21 | 0.42 | 0.14 |
| chr5 | 102366357 | 102366574 | Wdfy3         | ENSMUSG00000043940 | 230  | 0.78 | NA   | 0.71 | NA   | 1    | 0.93 |
| chr5 | 108152281 | 108153094 | Gfi1          | ENSMUSG00000029275 | 289  | 0.27 | NA   | 0.15 | 0.33 | 0.2  | 0.21 |
| chr5 | 113919523 | 113920126 | Wscd2         | ENSMUSG00000085571 | 52   | 0.09 | 0.11 | 0.1  | 0.16 | 0.08 | 0.13 |
| chr5 | 144131674 | 144131936 | Grid2ip       | ENSMUSG00000010825 | 34   | 0.11 | NA   | 0.1  | 0.08 | 0.22 | 0.11 |
| chr5 | 21242988  | 21243226  | Pmpcb         | ENSMUSG00000029017 | 148  | 0.19 | 0.11 | 0.09 | 0.11 | 0.25 | 0.11 |
| chr5 | 23930900  | 23931616  | Slc4a2        | ENSMUSG00000028962 | 208  | 0.22 | 0.41 | 0.09 | 0.11 | 0.18 | 0.09 |
| chr5 | 24235914  | 24236660  | Wdr86         | ENSMUSG00000055235 | 211  | 0.12 | 0.15 | 0.14 | 0.07 | 0.14 | 0.18 |
| chr5 | 90652620  | 90653122  | Cox18         | ENSMUSG00000035505 | 93   | 0.12 | 0.1  | 0.06 | 0.1  | 0.1  | 0.15 |

|      |           |           |               |                     |       |      |      |      |      |      |      |
|------|-----------|-----------|---------------|---------------------|-------|------|------|------|------|------|------|
| chr5 | 114541141 | 114541493 | Svop          | ENSMUSG00000042078  | 59    | 0.21 | 0.54 | 0.11 | 0.29 | 0.14 | 0.19 |
| chr5 | 115569016 | 115569271 | Acads         | ENSMUSG00000029545  | 141   | 0.29 | 0.08 | 0.1  | 0.15 | 0.24 | 0.17 |
| chr5 | 144288359 | 144289175 | Rac1          | ENSMUSG00000001847  | 94    | 0.13 | 0.13 | 0.12 | 0.17 | 0.12 | 0.11 |
| chr5 | 148211482 | 148212129 | Flt3          | ENSMUSG000000042817 | 66    | 0.18 | 0.21 | 0.14 | 0.14 | 0.2  | 0.13 |
| chr5 | 148536555 | 148538208 | Flt1          | ENSMUSG000000029648 | 183   | 0.08 | 0.11 | 0.11 | 0.13 | 0.07 | 0.15 |
| chr5 | 32761163  | 32762138  | Ppp1cb        | ENSMUSG000000014956 | 303   | 0.1  | 0.17 | 0.09 | 0.09 | 0.09 | 0.14 |
| chr5 | 135027740 | 135028131 | Clip2         | ENSMUSG000000063146 | 369   | 0.11 | 0.07 | 0.07 | 0.15 | 0.1  | 0.25 |
| chr5 | 135462156 | 135463053 | Cldn3         | ENSMUSG000000070473 | 289   | 0.15 | 0.16 | 0.14 | 0.22 | 0.16 | 0.2  |
| chr5 | 5514307   | 5515012   | Cldn12        | ENSMUSG000000046798 | -210  | 0.19 | 0.14 | 0.09 | 0.19 | 0.2  | 0.14 |
| chr5 | 8056390   | 8056751   | Sri           | ENSMUSG000000003161 | 43    | 0.17 | 0.06 | 0.06 | 0.24 | 0.06 | 0.16 |
| chr5 | 30969252  | 30969588  | Cenpa         | ENSMUSG000000029177 | 161   | 0.14 | 0.17 | 0.09 | 0.1  | 0.08 | 0.11 |
| chr5 | 108697716 | 108698348 | Dr1           | ENSMUSG000000029265 | 116   | 0.33 | 0.26 | 0.11 | 0.15 | 0.27 | 0.16 |
| chr5 | 130175745 | 130176069 | Zfp11         | ENSMUSG000000051034 | 67    | 0.22 | 0.2  | 0.15 | 0.18 | 0.31 | 0.13 |
| chr5 | 130417398 | 130418494 | Vkorc111      | ENSMUSG000000066735 | -33   | 0.46 | 0.22 | 0.16 | 0.17 | 0.5  | 0.17 |
| chr5 | 102498028 | 102499412 | Wdfy3         | ENSMUSG000000043940 | 220   | 0.14 | 0.14 | 0.1  | 0.12 | 0.14 | 0.12 |
| chr5 | 18733210  | 18733565  | Magi2         | ENSMUSG000000040003 | 523   | 0.37 | 0.11 | 0.09 | 0.13 | 0.27 | 0.15 |
| chr5 | 98610334  | 98610597  | Prdm8         | ENSMUSG000000035456 | 468   | 0.25 | 0.11 | 0.08 | 0.16 | 0.09 | 0.13 |
| chr5 | 115577000 | 115577407 | Unc119b       | ENSMUSG000000046562 | 319   | 0.94 | 0.83 | 1    | 0.92 | 0.89 | 0.94 |
| chr5 | 117838609 | 117839255 | Rfc5          | ENSMUSG000000029363 | 99    | 0.19 | 0.17 | 0.09 | 0.19 | 0.16 | 0.12 |
| chr5 | 123610837 | 123611076 | Setd1b        | ENSMUSG000000038384 | -1762 | 0.9  | 0.88 | 0.81 | 0.93 | 0.87 | 0.97 |
| chr5 | 124022723 | 124023088 | Vps33a        | ENSMUSG000000029434 | 119   | 0.1  | 0.11 | 0.06 | 0.18 | 0.17 | 0.07 |
| chr5 | 35399531  | 35400008  | Dok7          | ENSMUSG000000044716 | 232   | 0.22 | 0.33 | 0.12 | 0.11 | 0.25 | 0.09 |
| chr5 | 45884413  | 45885006  | Lap3          | ENSMUSG000000039682 | 96    | 0.22 | 0.33 | 0.1  | 0.18 | 0.32 | 0.11 |
| chr5 | 66154566  | 66156106  | 1700022K14Rik | ENSMUSG000000072918 | -740  | 0.14 | 0.1  | 0.1  | 0.12 | 0.13 | 0.14 |
| chr5 | 138696769 | 138697089 | 0910001L09Rik | ENSMUSG000000050552 | 93    | 0.25 | NA   | 0.09 | 0.25 | 0.45 | 0.34 |
| chr5 | 136438449 | 136439123 | Srceb4d       | ENSMUSG000000029699 | -589  | 0.09 | 0.13 | 0.09 | 0.14 | 0.11 | 0.11 |
| chr5 | 139468874 | 139472175 | Pdgfra        | ENSMUSG000000025856 | -289  | 0.13 | 0.14 | 0.11 | 0.13 | 0.13 | 0.15 |
| chr5 | 8996968   | 8997494   | Crot          | ENSMUSG000000003623 | -189  | 0.17 | 0.15 | 0.1  | 0.2  | 0.16 | 0.19 |
| chr5 | 33206042  | 33206591  | Depdc5        | ENSMUSG000000037426 | -34   | 0.06 | 0.07 | 0.07 | 0.15 | 0.07 | 0.19 |
| chr5 | 81448608  | 81449647  | Lphn3         | ENSMUSG000000037605 | -36   | 0.13 | 0.1  | 0.09 | 0.15 | 0.11 | 0.14 |



|      |           |           |               |                     |      |      |      |      |      |      |      |
|------|-----------|-----------|---------------|---------------------|------|------|------|------|------|------|------|
| chr5 | 104084357 | 104084837 | 1700016H13Rik | ENSMUSG00000029320  | 145  | 0.25 | 0.31 | 0.13 | 0.29 | 0.22 | 0.17 |
| chr5 | 147396263 | 147396699 | Gpr12         | ENSMUSG00000041468  | 334  | 0.5  | 0.4  | 0.12 | 0.17 | 0.14 | 0.21 |
| chr5 | 53174215  | 53174530  | Zcchc4        | ENSMUSG00000029179  | 78   | 0.14 | 0.64 | 0.08 | 0.11 | 0.11 | 0.13 |
| chr5 | 108116945 | 108117229 | Gm17717       | ENSMUSG00000091666  | -53  | 0.25 | 0.44 | 0.12 | 0.19 | 0.11 | 0.13 |
| chr5 | 115273235 | 115273697 | Gm20499       | ENSMUSG00000092252  | 3    | 0.11 | 0.13 | 0.07 | 0.13 | 0.14 | 0.1  |
| chr5 | 115584449 | 115585076 | Unc119b       | ENSMUSG00000046562  | 172  | 0.09 | 0.11 | 0.09 | 0.13 | 0.1  | 0.13 |
| chr5 | 124539920 | 124540169 | Abcb9         | ENSMUSG00000029408  | 227  | 1    | 0.93 | 0.21 | 1    | 0.85 | 0.5  |
| chr5 | 53604171  | 53604930  | Sel1l3        | ENSMUSG00000029189  | 141  | 0.08 | 0.24 | 0.1  | 0.13 | 0.09 | 0.15 |
| chr5 | 115722670 | 115722892 | Rnf10         | ENSMUSG00000041740  | 120  | 0.12 | 0.1  | 0.07 | 0.16 | 0.09 | 0.12 |
| chr5 | 121847868 | 121848436 | Naa25         | ENSMUSG00000042719  | 207  | 0.17 | 0.18 | 0.07 | 0.1  | 0.18 | 0.14 |
| chr5 | 124545487 | 124546081 | Abcb9         | ENSMUSG00000029408  | 11   | 0.12 | 0.12 | 0.12 | 0.15 | 0.13 | 0.16 |
| chr5 | 136719723 | 136720009 | Sh2b2         | ENSMUSG00000005057  | 907  | 0.09 | 0.14 | 0.14 | 0.16 | 0.11 | 0.17 |
| chr5 | 88982786  | 88983743  | Utp3          | ENSMUSG00000070697  | -244 | 0.11 | 0.16 | 0.16 | 0.15 | 0.09 | 0.11 |
| chr5 | 141211465 | 141211753 | Amz1          | ENSMUSG00000050022  | 129  | 0.14 | 0.08 | 0.12 | 0.25 | 0.11 | 0.14 |
| chr5 | 24191417  | 24191864  | Nub1          | ENSMUSG00000028954  | 7    | 0.18 | 0.14 | 0.11 | 0.18 | 0.2  | 0.15 |
| chr5 | 33994520  | 33994547  | Slbp          | ENSMUSG00000004642  | -43  | 0.13 | 0.27 | 0.1  | 0.16 | 0.08 | 0.13 |
| chr5 | 36235819  | 36236246  | Afap1         | ENSMUSG00000029094  | 64   | 0.09 | 0.11 | 0.07 | 0.17 | 0.13 | 0.13 |
| chr5 | 45841138  | 45841886  | Qdpr          | ENSMUSG00000015806  | -308 | 0.08 | 0.12 | 0.09 | 0.13 | 0.08 | 0.16 |
| chr5 | 74488937  | 74489545  | 2700023E23Rik | ENSMUSG00000053656  | 156  | 0.09 | 0.13 | 0.08 | 0.16 | 0.08 | 0.09 |
| chr5 | 122499874 | 122500534 | Cux2          | ENSMUSG00000042589  | -93  | 0.14 | 0.12 | 0.09 | 0.11 | 0.13 | 0.1  |
| chr5 | 140267320 | 140268139 | Mafk          | ENSMUSG00000018143  | 262  | 0.23 | 0.21 | 0.22 | 0.16 | 0.18 | 0.13 |
| chr5 | 28786412  | 28786630  | 9530036O11Rik | ENSMUSG000000086663 | 1707 | 0.2  | 0.08 | 0.06 | 0.19 | 0.32 | 0.15 |
| chr5 | 98459542  | 98460342  | Antxr2        | ENSMUSG00000029338  | 39   | 0.12 | 0.1  | 0.13 | 0.15 | 0.11 | 0.15 |
| chr5 | 111238597 | 111239241 | Ulk1          | ENSMUSG00000029512  | 197  | 0.08 | 0.09 | 0.1  | 0.15 | 0.08 | 0.14 |
| chr5 | 135726098 | 135727357 | Fzd9          | ENSMUSG00000049551  | 373  | 0.1  | 0.2  | 0.1  | 0.22 | 0.09 | 0.12 |
| chr5 | 116474176 | 116474735 | Prkab1        | ENSMUSG00000029513  | -90  | 0.1  | 0.22 | 0.1  | 0.17 | 0.09 | 0.14 |
| chr5 | 36872942  | 36873248  | Tbc1d14       | ENSMUSG00000029192  | 61   | 0.07 | 0.14 | 0.11 | 0.1  | 0.09 | 0.23 |
| chr5 | 37636895  | 37637663  | Crmp1         | ENSMUSG00000029121  | 248  | 0.18 | 0.12 | 0.18 | 0.11 | 0.24 | 0.12 |
| chr5 | 53982262  | 53982467  | Rbpj          | ENSMUSG00000039191  | 551  | 0.12 | 0.13 | 0.07 | 0.11 | 0.13 | 0.08 |
| chr5 | 122734460 | 122735434 | Pptc7         | ENSMUSG00000038582  | 573  | 0.14 | 0.2  | 0.13 | 0.19 | 0.13 | 0.13 |

|      |          |          |               |                     |      |      |      |      |      |      |      |
|------|----------|----------|---------------|---------------------|------|------|------|------|------|------|------|
| chr5 | 3647295  | 3647986  | Gatad1        | ENSMUSG00000007415  | 166  | 0.11 | 0.28 | 0.09 | 0.14 | 0.11 | 0.13 |
| chr5 | 4104023  | 4104867  | Cyp51         | ENSMUSG00000001467  | -102 | 0.15 | 0.29 | 0.07 | 0.37 | 0.16 | 0.19 |
| chr5 | 5693744  | 5694312  | Steap2        | ENSMUSG000000015653 | 24   | 0.17 | 0.28 | 0.07 | 0.22 | 0.18 | 0.09 |
| chr5 | 8798261  | 8798594  | Gm5106        | ENSMUSG000000084763 | 96   | 0.11 | 0.13 | 0.22 | 0.15 | 0.1  | 0.24 |
| chr5 | 14514954 | 14515552 | Pclo          | ENSMUSG000000061601 | 335  | 0.1  | 0.1  | 0.09 | 0.11 | 0.1  | 0.12 |
| chr5 | 20930869 | 20931385 | Fam185a       | ENSMUSG000000047221 | 308  | 0.2  | 0.11 | 0.07 | 0.25 | 0.2  | 0.12 |
| chr5 | 21292438 | 21292872 | Psmc2         | ENSMUSG000000028932 | 1554 | 0.1  | 0.14 | 0.12 | 0.15 | 0.09 | 0.1  |
| chr5 | 23293473 | 23293821 | Rint1         | ENSMUSG000000028999 | 118  | 0.15 | 0.14 | 0.09 | 0.19 | 0.16 | 0.18 |
| chr5 | 23535776 | 23536430 | Fam126a       | ENSMUSG000000028995 | 20   | 0.08 | 0.14 | 0.1  | 0.12 | 0.08 | 0.14 |
| chr5 | 24092303 | 24092844 | Chpf2         | ENSMUSG000000038181 | 14   | 1    | NA   | 0.15 | NA   | 1    | 0.35 |
| chr5 | 25265729 | 25266049 | Actr3b        | ENSMUSG000000056367 | 74   | 0.19 | NA   | 0.16 | 0.09 | 0.23 | 0.13 |
| chr5 | 28643083 | 28644136 | Rbm33         | ENSMUSG000000048271 | -52  | 0.1  | 0.17 | 0.12 | 0.13 | 0.1  | 0.1  |
| chr5 | 30559004 | 30559560 | Ept1          | ENSMUSG000000075703 | 161  | 0.08 | 0.06 | 0.07 | 0.13 | 0.09 | 0.09 |
| chr5 | 31190013 | 31190379 | Agbl5         | ENSMUSG000000029165 | -871 | 0.09 | 0.09 | 0.09 | 0.15 | 0.08 | 0.17 |
| chr5 | 31262334 | 31262796 | Preb          | ENSMUSG000000045302 | 60   | 0.15 | 0.17 | 0.12 | 0.21 | 0.15 | 0.2  |
| chr5 | 31357097 | 31357575 | Cad           | ENSMUSG000000013629 | 183  | 0.09 | 0.15 | 0.12 | 0.23 | 0.09 | 0.17 |
| chr5 | 31397229 | 31398025 | Gm9924        | ENSMUSG000000053839 | 270  | 0.08 | 0.22 | 0.12 | 0.16 | 0.07 | 0.14 |
| chr5 | 31916303 | 31916608 | Mrpl33        | ENSMUSG000000029142 | 143  | 0.09 | 0.07 | 0.09 | 0.12 | 0.08 | 0.08 |
| chr5 | 33677748 | 33678907 | Maea          | ENSMUSG000000079562 | 113  | 0.12 | 0.13 | 0.09 | 0.17 | 0.12 | 0.14 |
| chr5 | 34511801 | 34512357 | Haus3         | ENSMUSG000000079555 | 15   | 0.2  | 0.12 | 0.15 | 0.21 | 0.5  | 0.15 |
| chr5 | 34629838 | 34631375 | Zfyve28       | ENSMUSG000000037224 | 369  | 0.11 | 0.16 | 0.09 | 0.12 | 0.11 | 0.09 |
| chr5 | 34856132 | 34856760 | Tnip2         | ENSMUSG000000059866 | -137 | 1    | 0.29 | 0.1  | 0.11 | 0.57 | 0.15 |
| chr5 | 34892177 | 34892446 | Sh3bp2        | ENSMUSG000000054520 | 86   | 0.13 | 0.33 | 0.09 | 0.1  | 0.12 | 0.2  |
| chr5 | 35917250 | 35917835 | 2310079F23Rik | ENSMUSG000000029097 | -219 | 0.12 | 0.14 | 0.11 | 0.13 | 0.12 | 0.15 |
| chr5 | 39075452 | 39076095 | Zfp518b       | ENSMUSG000000046572 | 216  | 0.06 | 0.1  | 0.1  | 0.15 | 0.07 | 0.12 |
| chr5 | 45911457 | 45911973 | Med28         | ENSMUSG000000015804 | 255  | 0.13 | 0.09 | 0.11 | 0.17 | 0.13 | 0.22 |
| chr5 | 53009807 | 53010018 | 8030423F21Rik | ENSMUSG000000052295 | 338  | 0.5  | 0.19 | 0.07 | 0.11 | 0.37 | 0.21 |
| chr5 | 53132770 | 53133234 | Pi4k2b        | ENSMUSG000000029186 | 176  | 0.17 | 0.15 | 0.11 | 0.09 | 0.15 | 0.12 |
| chr5 | 53225272 | 53225517 | Anapc4        | ENSMUSG000000029176 | 29   | 0.1  | 0.08 | 0.09 | 0.13 | 0.07 | 0.14 |
| chr5 | 53440394 | 53440664 | Gm17182       | ENSMUSG000000090642 | -103 | 0.15 | 0.1  | 0.17 | 0.15 | 0.15 | 0.16 |

|      |           |           |               |                    |      |      |      |      |      |      |      |
|------|-----------|-----------|---------------|--------------------|------|------|------|------|------|------|------|
| chr5 | 65782247  | 65782928  | Rpl9          | ENSMUSG00000047215 | 31   | 0.1  | 0.13 | 0.12 | 0.18 | 0.1  | 0.17 |
| chr5 | 65826542  | 65827306  | Ugdh          | ENSMUSG00000029201 | 46   | 0.15 | 0.08 | 0.12 | 0.12 | 0.16 | 0.14 |
| chr5 | 67009086  | 67009985  | Apbb2         | ENSMUSG00000029207 | 344  | 0.1  | 0.06 | 0.08 | 0.15 | 0.1  | 0.1  |
| chr5 | 68238358  | 68238867  | Gm15477       | ENSMUSG00000087261 | 237  | 0.15 | 0.22 | 0.25 | NA   | 0.13 | 0.14 |
| chr5 | 69947994  | 69948557  | Guf1          | ENSMUSG00000029208 | 112  | 0.09 | 0.09 | 0.08 | 0.19 | 0.07 | 0.16 |
| chr5 | 73259602  | 73260057  | Tec           | ENSMUSG00000029217 | -194 | 0.07 | 0.09 | 0.12 | 0.13 | 0.08 | 0.19 |
| chr5 | 73404681  | 73405382  | Gm15847       | ENSMUSG00000081849 | 293  | 0.12 | 0.11 | 0.13 | 0.31 | 0.11 | 0.12 |
| chr5 | 74931418  | 74932057  | Fip111        | ENSMUSG00000029227 | 263  | 0.08 | 0.11 | 0.14 | 0.21 | 0.09 | 0.16 |
| chr5 | 76373684  | 76373940  | Kdr           | ENSMUSG00000062960 | 641  | 0.25 | 0.15 | 0.12 | 0.19 | 0.12 | 0.17 |
| chr5 | 77086559  | 77087425  | C530008M17Rik | ENSMUSG00000036377 | 284  | 0.11 | 0.16 | 0.07 | 0.13 | 0.1  | 0.12 |
| chr5 | 88994113  | 88994889  | Rufy3         | ENSMUSG00000029291 | 327  | 0.31 | 0.18 | 0.13 | 0.23 | 0.31 | 0.14 |
| chr5 | 93521832  | 93523191  | 11-Sep        | ENSMUSG00000058013 | 28   | 0.11 | 0.21 | 0.11 | 0.13 | 0.12 | 0.17 |
| chr5 | 100947133 | 100947946 | Cops4         | ENSMUSG00000035297 | 211  | 0.17 | 0.11 | 0.15 | 0.24 | 0.1  | 0.13 |
| chr5 | 101227196 | 101227933 | Helq          | ENSMUSG00000035266 | -77  | 0.08 | 0.09 | 0.11 | 0.14 | 0.08 | 0.13 |
| chr5 | 107832307 | 107832921 | Ephx4         | ENSMUSG00000033805 | 99   | 0.08 | 0.19 | 0.1  | 0.18 | 0.08 | 0.21 |
| chr5 | 108153705 | 108155891 | A430072P03Rik | ENSMUSG00000090030 | 621  | 0.26 | 0.38 | 0.14 | 0.2  | 0.25 | 0.19 |
| chr5 | 108561104 | 108562008 | Tmed5         | ENSMUSG00000063406 | -7   | 0.19 | 0.29 | 0.11 | 0.16 | 0.18 | 0.12 |
| chr5 | 108889985 | 108890638 | Pcgf3         | ENSMUSG00000033623 | 60   | 0.09 | 0.15 | 0.11 | 0.1  | 0.09 | 0.14 |
| chr5 | 110605515 | 110606100 | Gm15787       | ENSMUSG00000086247 | -284 | 0.13 | 0.16 | 0.11 | 0.15 | 0.18 | 0.12 |
| chr5 | 110659869 | 110660514 | Ankle2        | ENSMUSG00000029501 | 131  | 0.1  | 0.11 | 0.08 | 0.12 | 0.09 | 0.12 |
| chr5 | 110698453 | 110699004 | Pgam5         | ENSMUSG00000029500 | 178  | 0.15 | 0.16 | 0.16 | 0.18 | 0.13 | 0.12 |
| chr5 | 110771442 | 110772064 | P2rx2         | ENSMUSG00000029503 | 301  | 0.5  | 0.48 | 0.24 | 0.28 | 0.43 | 0.34 |
| chr5 | 112755138 | 112755587 | Tfip11        | ENSMUSG00000029345 | -16  | 0.12 | 0.06 | 0.13 | 0.15 | 0.11 | 0.13 |
| chr5 | 114577437 | 114578294 | Alkbh2        | ENSMUSG00000044339 | 320  | 0.12 | 0.17 | 0.19 | 0.2  | 0.14 | 0.18 |
| chr5 | 114580353 | 114581647 | Ung           | ENSMUSG00000029591 | 605  | 0.3  | 0.5  | 0.12 | 0.19 | 0.3  | 0.17 |
| chr5 | 115157773 | 115158015 | Tchp          | ENSMUSG00000002486 | 66   | 1    | 0.21 | 0.12 | 0.2  | 0.5  | 0.15 |
| chr5 | 115687934 | 115688429 | Pop5          | ENSMUSG00000060152 | 193  | 0.1  | 0.08 | 0.07 | 0.16 | 0.11 | 0.17 |
| chr5 | 115777004 | 115777966 | Srsf9         | ENSMUSG00000029538 | 299  | 0.14 | 0.12 | 0.12 | 0.13 | 0.15 | 0.21 |
| chr5 | 115939935 | 115940260 | U4            | ENSMUSG00000075779 | -166 | 0.11 | 0.07 | 0.16 | 0.16 | 0.12 | 0.13 |
| chr5 | 117807477 | 117807768 | Wsb2          | ENSMUSG00000029364 | 308  | 0.2  | 0.18 | 0.15 | 0.18 | 0.21 | 0.19 |

|      |           |           |               |                     |       |      |      |      |      |      |      |
|------|-----------|-----------|---------------|---------------------|-------|------|------|------|------|------|------|
| chr5 | 118694862 | 118695434 | Rnfr2         | ENSMUSG00000032850  | -278  | 0.13 | 0.14 | 0.11 | 0.15 | 0.11 | 0.24 |
| chr5 | 121835296 | 121835704 | Trafd1        | ENSMUSG00000042726  | -131  | 0.1  | 0.08 | 0.1  | 0.12 | 0.09 | 0.1  |
| chr5 | 122043171 | 122043697 | Aldh2         | ENSMUSG00000029455  | 155   | 1    | 0.44 | 0.23 | 1    | 1    | 0.21 |
| chr5 | 122068901 | 122069165 | Acad12        | ENSMUSG00000042647  | -86   | 0.5  | 0.2  | 0.09 | 0.1  | 0.17 | 0.09 |
| chr5 | 123157526 | 123157949 | P2rx4         | ENSMUSG00000029470  | 144   | 0.18 | 0.3  | 0.14 | 0.1  | 0.2  | 0.22 |
| chr5 | 123402179 | 123402615 | Kdm2b         | ENSMUSG00000029475  | 118   | 1    | NA   | 0.14 | 1    | 1    | 0.63 |
| chr5 | 123439121 | 123439396 | Kdm2b         | ENSMUSG00000029475  | 57    | 0.17 | 0.1  | 0.11 | 0.38 | 0.08 | 0.18 |
| chr5 | 124199154 | 124199722 | Rsrc2         | ENSMUSG00000029422  | -17   | 0.09 | 0.14 | 0.12 | 0.15 | 0.09 | 0.13 |
| chr5 | 124927865 | 124928441 | Rilpl2        | ENSMUSG00000029401  | 222   | 0.12 | 0.1  | 0.1  | 0.25 | 0.13 | 0.13 |
| chr5 | 125491681 | 125491949 | Fam101a       | ENSMUSG00000037962  | 1332  | 1    | 0.6  | 0.27 | 0.6  | 1    | 0.68 |
| chr5 | 128097046 | 128097874 | Slc15a4       | ENSMUSG00000029416  | 136   | 0.11 | 0.09 | 0.14 | 0.23 | 0.1  | 0.14 |
| chr5 | 130221260 | 130221588 | Mrps17        | ENSMUSG00000034211  | 52    | 0.25 | 0.25 | 0.11 | 0.13 | 0.5  | 0.2  |
| chr5 | 130292903 | 130293595 | Psph          | ENSMUSG00000029446  | -120  | 0.23 | 0.26 | 0.11 | 0.15 | 0.2  | 0.11 |
| chr5 | 130620080 | 130621073 | Kctd7         | ENSMUSG00000034110  | -155  | 0.17 | 0.15 | 0.11 | 0.15 | 0.15 | 0.2  |
| chr5 | 134932601 | 134932817 | Gtf2ird1      | ENSMUSG00000023079  | -128  | 0.11 | 0.1  | 0.12 | 0.17 | 0.06 | 0.14 |
| chr5 | 135058448 | 135058804 | Rfc2          | ENSMUSG00000023104  | 66    | 0.11 | 0.27 | 0.11 | 0.14 | 0.09 | 0.15 |
| chr5 | 135484736 | 135485702 | Abhd11        | ENSMUSG00000040532  | 197   | 0.07 | 1    | 0.19 | 0.14 | 0.11 | 0.16 |
| chr5 | 135662558 | 135664058 | Baz1b         | ENSMUSG00000002748  | 174   | 0.13 | 0.12 | 0.1  | 0.14 | 0.13 | 0.17 |
| chr5 | 136020796 | 136021170 | Hip1          | ENSMUSG00000039959  | 9     | 0.25 | 0.15 | 0.14 | 0.04 | 0.17 | 0.19 |
| chr5 | 136219707 | 136220235 | Tmem120a      | ENSMUSG00000039886  | 107   | 0.2  | 0.22 | 0.18 | 0.2  | 0.19 | 0.16 |
| chr5 | 136611508 | 136612143 | Lrwd1         | ENSMUSG00000029703  | 42    | 0.11 | 0.21 | 0.11 | 0.2  | 0.1  | 0.19 |
| chr5 | 136674350 | 136674921 | Prkrip1       | ENSMUSG00000039737  | 143   | 0.14 | 0.11 | 0.09 | 0.05 | 0.08 | 0.12 |
| chr5 | 137041309 | 137044929 | Cux1          | ENSMUSG00000029705  | -1552 | 0.2  | 0.23 | 0.13 | 0.17 | 0.19 | 0.18 |
| chr5 | 137395062 | 137395352 | 4933404O12Rik | ENSMUSG000000085062 | 191   | 0.1  | 0.06 | 0.11 | 0.24 | 0.1  | 0.09 |
| chr5 | 138086336 | 138086713 | Irs3          | ENSMUSG00000047182  | 241   | 0.25 | 0.21 | 0.21 | NA   | 0.35 | 0.34 |
| chr5 | 138635596 | 138636304 | Mblac1        | ENSMUSG000000049285 | 408   | 0.14 | 0.08 | 0.1  | 0.16 | 0.09 | 0.15 |
| chr5 | 139936324 | 139936679 | 3110082I17Rik | ENSMUSG000000053553 | -45   | 1    | NA   | NA   | 1    | 1    | 1    |
| chr5 | 139960140 | 139960567 | Zfand2a       | ENSMUSG000000053581 | 29    | 0.23 | 0.12 | 0.11 | 0.15 | 0.22 | 0.14 |
| chr5 | 143026432 | 143027344 | Radii         | ENSMUSG00000029576  | 31    | 0.27 | 0.15 | 0.1  | 0.14 | 0.28 | 0.15 |
| chr5 | 144125852 | 144126192 | Grid2ip       | ENSMUSG00000010825  | 435   | 0.1  | NA   | 0.12 | 0.06 | 0.13 | 0.24 |

|      |           |           |               |                    |       |      |      |      |      |      |      |
|------|-----------|-----------|---------------|--------------------|-------|------|------|------|------|------|------|
| chr5 | 144775450 | 144775788 | Ccz1          | ENSMUSG00000029617 | 103   | 0.25 | 0.23 | 0.09 | 0.16 | 0.17 | 0.17 |
| chr5 | 145927828 | 145928569 | Ptcd1         | ENSMUSG00000029624 | -269  | 0.17 | 0.08 | 0.11 | 0.15 | 0.16 | 0.17 |
| chr5 | 147656523 | 147657159 | Rasi11a       | ENSMUSG00000029641 | 194   | 0.1  | 0.31 | 0.1  | 0.1  | 0.08 | 0.16 |
| chr5 | 148001391 | 148001845 | Gsx1          | ENSMUSG00000053129 | 1346  | 0.14 | 0.15 | 0.1  | 0.2  | 0.16 | 0.21 |
| chr5 | 150438411 | 150439386 | Hsph1         | ENSMUSG00000029657 | -152  | 0.08 | 0.09 | 0.09 | 0.14 | 0.09 | 0.11 |
| chr5 | 152036061 | 152036419 | Stard13       | ENSMUSG00000016128 | 109   | 0.2  | 0.33 | 0.1  | 0.29 | 0.14 | 0.12 |
| chr5 | 8367113   | 8367320   | Adam22        | ENSMUSG00000040537 | 766   | NA   | NA   | 0.13 | 0.12 | NA   | 0.3  |
| chr5 | 9266123   | 9266516   | 9330182L06Rik | ENSMUSG00000056004 | 192   | NA   | 0.29 | 0.12 | 0.24 | NA   | 0.16 |
| chr5 | 14025265  | 14025475  | Sema3e        | ENSMUSG00000063531 | 94    | NA   | NA   | 0.16 | NA   | NA   | 0.31 |
| chr5 | 20691971  | 20692323  | Pion          | ENSMUSG00000039934 | 62    | NA   | 0.1  | 0.13 | 0.22 | 0.06 | 0.15 |
| chr5 | 23218086  | 23218630  | SNORD93       | ENSMUSG00000080335 | -1479 | NA   | NA   | 0.2  | 0.15 | NA   | 0.18 |
| chr5 | 23336908  | 23337370  | 4933427G23Rik | ENSMUSG00000086697 | 302   | NA   | NA   | 0.32 | NA   | NA   | 0.5  |
| chr5 | 23349893  | 23350136  | Tomm7         | ENSMUSG00000028998 | -35   | NA   | 0.5  | 0.62 | 0.21 | 0.25 | 0.23 |
| chr5 | 27144078  | 27144426  | Dpp6          | ENSMUSG00000061576 | 278   | NA   | 0.17 | 0.11 | 0.27 | 0.42 | 0.13 |
| chr5 | 28793305  | 28793579  | 9530036O11Rik | ENSMUSG00000086663 | -82   | 0.56 | NA   | 0.15 | 0.26 | NA   | 0.33 |
| chr5 | 29522033  | 29522833  | Rnf32         | ENSMUSG00000029130 | -99   | NA   | 0.1  | 0.07 | 0.32 | 0.08 | 0.25 |
| chr5 | 31223771  | 31224086  | Khk           | ENSMUSG00000029162 | -1    | NA   | 0.55 | 0.15 | 0.22 | 0.2  | 0.22 |
| chr5 | 31252251  | 31252471  | Abhd1         | ENSMUSG00000006638 | -78   | NA   | NA   | 0.36 | NA   | NA   | 0.25 |
| chr5 | 31439682  | 31439966  | Gm15469       | ENSMUSG00000085493 | -107  | NA   | 1    | 0.33 | NA   | NA   | 0.24 |
| chr5 | 31481947  | 31482638  | Gtf3c2        | ENSMUSG00000029144 | -10   | 1    | 0.17 | 0.04 | 0.23 | NA   | 0.27 |
| chr5 | 31504371  | 31504729  | Zfp513        | ENSMUSG00000043059 | -135  | NA   | 0.81 | 0.23 | 0.31 | 0.23 | 0.32 |
| chr5 | 31553973  | 31554523  | Krtcap3       | ENSMUSG00000029149 | 184   | NA   | NA   | 0.81 | 0.83 | 0.67 | 0.5  |
| chr5 | 31593387  | 31593697  | Ift172        | ENSMUSG00000038564 | -55   | NA   | NA   | 0.08 | 0.09 | 1    | 0.18 |
| chr5 | 33446859  | 33447262  | Slc5a1        | ENSMUSG00000011034 | 192   | NA   | NA   | 0.25 | 0.08 | NA   | 0.41 |
| chr5 | 34868355  | 34868782  | Sh3bp2        | ENSMUSG00000054520 | 81    | NA   | NA   | 0.3  | 0.54 | 0.67 | 0.73 |
| chr5 | 35868066  | 35868325  | Cpz           | ENSMUSG00000036596 | 25    | NA   | 0.5  | 0.08 | NA   | 1    | NA   |
| chr5 | 36021621  | 36022070  | Htra3         | ENSMUSG00000029096 | 276   | NA   | 0.11 | 0.1  | 0.1  | 0.07 | 0.09 |
| chr5 | 37221723  | 37221969  | Man2b2        | ENSMUSG00000029119 | 46    | NA   | 0.5  | 0.07 | 0.15 | 0.42 | 0.16 |
| chr5 | 37729612  | 37729884  | Evc2          | ENSMUSG00000050248 | 31    | NA   | NA   | NA   | NA   | 1    | 0.33 |
| chr5 | 46030313  | 46030780  | 9630001P10Rik | ENSMUSG00000085726 | 18    | NA   | NA   | 0.13 | 0.18 | NA   | 0.13 |

|      |           |           |               |                     |      |      |      |      |      |      |      |
|------|-----------|-----------|---------------|---------------------|------|------|------|------|------|------|------|
| chr5 | 48377360  | 48377629  | Slit2         | ENSMUSG000000031558 | 1261 | NA   | 0.25 | 0.08 | 0.26 | 0.08 | 0.1  |
| chr5 | 49915771  | 49916272  | Kcnip4        | ENSMUSG000000029088 | -18  | NA   | 0.4  | 0.12 | 0.07 | NA   | 0.19 |
| chr5 | 54200769  | 54200982  | Tbc1d19       | ENSMUSG000000039178 | 9    | NA   | 0.2  | 0.18 | 0.12 | 0.05 | 0.22 |
| chr5 | 58107072  | 58107444  | 4932441J04Rik | ENSMUSG000000085597 | 1900 | 0.11 | 0.08 | 0.22 | 0.14 | NA   | 0.17 |
| chr5 | 71487028  | 71487377  | Gabra2        | ENSMUSG000000000560 | -114 | 1    | 0.07 | 0.12 | 0.19 | NA   | 0.31 |
| chr5 | 72048993  | 72049314  | Gabra4        | ENSMUSG000000029211 | 394  | NA   | 0.14 | 0.07 | 0.17 | 0.05 | 0.16 |
| chr5 | 74038580  | 74039126  | Sgcb          | ENSMUSG000000029156 | 99   | NA   | 0.8  | 0.2  | 0.44 | 0.33 | 0.22 |
| chr5 | 75473100  | 75473305  | Gsx2          | ENSMUSG000000092446 | 1575 | NA   | NA   | 0.12 | 0.08 | NA   | 0.21 |
| chr5 | 75547256  | 75547462  | Pdgfra        | ENSMUSG000000029231 | -957 | NA   | 0.6  | NA   | 0.33 | 0.56 | NA   |
| chr5 | 75548848  | 75549418  | Pdgfra        | ENSMUSG000000029231 | 817  | NA   | 0.64 | 0.15 | 0.43 | 0.33 | 0.11 |
| chr5 | 77334320  | 77334672  | Aasdh         | ENSMUSG000000055923 | -81  | NA   | NA   | 1    | NA   | 1    | NA   |
| chr5 | 90311492  | 90311726  | Adamts3       | ENSMUSG000000043635 | 750  | NA   | NA   | 0.27 | 0.6  | 1    | 0.45 |
| chr5 | 91946639  | 91947010  | Parm1         | ENSMUSG000000034981 | 183  | NA   | NA   | 0.06 | 0.18 | NA   | 0.12 |
| chr5 | 92391614  | 92392205  | Rchy1         | ENSMUSG000000029397 | -148 | NA   | 0.12 | 0.07 | 0.11 | 0.06 | 0.22 |
| chr5 | 92705932  | 92706182  | Naaa          | ENSMUSG000000029413 | 1134 | NA   | NA   | NA   | NA   | 1    | NA   |
| chr5 | 92821366  | 92821664  | Art3          | ENSMUSG000000034842 | -96  | NA   | NA   | 0.4  | NA   | NA   | 1    |
| chr5 | 93112422  | 93112779  | Shroom3       | ENSMUSG000000029381 | 139  | NA   | NA   | NA   | NA   | 0.5  | 0.5  |
| chr5 | 107393155 | 107393833 | Cdc7          | ENSMUSG000000029283 | 153  | NA   | 0.16 | 0.07 | 0.12 | 0.14 | 0.1  |
| chr5 | 107717841 | 107718682 | Tgfbr3        | ENSMUSG000000029287 | 353  | NA   | 0.62 | 0.15 | 0.23 | 0.3  | 0.18 |
| chr5 | 107760032 | 107760263 | Brdt          | ENSMUSG000000029279 | -31  | NA   | 1    | NA   | 1    | NA   | NA   |
| chr5 | 109089586 | 109090086 | Dgkq          | ENSMUSG000000004815 | -6   | NA   | 0.89 | 0.18 | 0.24 | 0.33 | 0.16 |
| chr5 | 111209243 | 111209685 | Pus1          | ENSMUSG000000029507 | 146  | NA   | NA   | 0.06 | 0.22 | 1    | 0.21 |
| chr5 | 111268436 | 111268875 | Hscb          | ENSMUSG000000043510 | -61  | NA   | NA   | 0.09 | 0.16 | NA   | 0.24 |
| chr5 | 112705176 | 112706120 | Tpst2         | ENSMUSG000000029344 | -63  | 1    | NA   | 0.21 | 0.13 | NA   | 0.2  |
| chr5 | 113444394 | 113444637 | Adrbk2        | ENSMUSG000000042249 | 19   | NA   | 0.19 | 0.14 | 0.34 | 0.07 | 0.1  |
| chr5 | 115886503 | 115886914 | 4930430O22Rik | ENSMUSG000000057354 | -93  | 0.27 | 0.14 | 0.13 | 0.2  | NA   | 0.16 |
| chr5 | 115941941 | 115942313 | Gm13836       | ENSMUSG000000081282 | 337  | NA   | 0.62 | 0.12 | 0.21 | 0.53 | 0.18 |
| chr5 | 120566390 | 120566685 | Rbm19         | ENSMUSG000000029594 | 18   | NA   | 0.13 | 0.07 | 0.12 | 0.1  | 0.13 |
| chr5 | 121654505 | 121655011 | Rpl6          | ENSMUSG000000029614 | 228  | NA   | 0.24 | 0.12 | 0.5  | 0.33 | 0.15 |
| chr5 | 123270924 | 123271345 | Anapc5        | ENSMUSG000000029472 | 214  | NA   | 0.13 | 0.17 | 0.23 | 0.07 | 0.18 |

|      |           |           |               |                    |       |      |      |      |      |      |      |
|------|-----------|-----------|---------------|--------------------|-------|------|------|------|------|------|------|
| chr5 | 123401790 | 123401993 | Kdm2b         | ENSMUSG00000029475 | 108   | NA   | NA   | 1    | NA   | NA   | NA   |
| chr5 | 123437542 | 123437820 | Kdm2b         | ENSMUSG00000029475 | 861   | NA   | NA   | 0.2  | 0.5  | NA   | 1    |
| chr5 | 123582282 | 123582495 | Rhof          | ENSMUSG00000029449 | 50    | NA   | NA   | NA   | NA   | NA   | 0.2  |
| chr5 | 123591145 | 123591402 | Al480526      | ENSMUSG00000090086 | -175  | NA   | 0.06 | 0.09 | 0.11 | 0.13 | 0.15 |
| chr5 | 123939282 | 123939487 | Lrrc43        | ENSMUSG00000063409 | 50    | NA   | NA   | 0.15 | 0.12 | NA   | 0.25 |
| chr5 | 124481934 | 124482433 | Vps37b        | ENSMUSG00000066278 | 86    | NA   | 0.07 | 0.11 | 0.22 | 0.16 | 0.19 |
| chr5 | 124561938 | 124562485 | Gm16001       | ENSMUSG00000085433 | 15    | 0.2  | 0.14 | 0.1  | 0.16 | NA   | 0.13 |
| chr5 | 124571342 | 124571588 | Pitpm2        | ENSMUSG00000029406 | 644   | NA   | 1    | 0.91 | NA   | 1    | 0.9  |
| chr5 | 125028932 | 125029246 | Eif2b1        | ENSMUSG00000029388 | -88   | NA   | 0.14 | 0.09 | 0.22 | 0.1  | 0.14 |
| chr5 | 125079713 | 125079952 | Atp6v0a2      | ENSMUSG00000038023 | 159   | NA   | NA   | NA   | NA   | NA   | 1    |
| chr5 | 125205422 | 125205712 | Dnahc10       | ENSMUSG00000038011 | 112   | NA   | 0.12 | 0.17 | 0.5  | 1    | 0.22 |
| chr5 | 129241911 | 129242223 | Piwil1        | ENSMUSG00000029423 | -54   | NA   | NA   | 1    | NA   | NA   | 1    |
| chr5 | 130371451 | 130371877 | 2410018M08Rik | ENSMUSG00000034173 | 71    | 0.23 | 0.23 | 0.13 | 0.26 | NA   | 0.1  |
| chr5 | 130478455 | 130478667 | Gusb          | ENSMUSG00000025534 | 170   | 0.14 | NA   | 0.08 | 0.21 | NA   | 0.2  |
| chr5 | 133950957 | 133951204 | Gm10051       | ENSMUSG00000058905 | 87    | 1    | NA   | 1    | NA   | NA   | 1    |
| chr5 | 134575495 | 134575984 | Gatsl2        | ENSMUSG00000015944 | 158   | NA   | 0.2  | 0.12 | 0.13 | 0.18 | 0.17 |
| chr5 | 135408183 | 135408446 | Wbscr27       | ENSMUSG00000040557 | 76    | NA   | NA   | 0.3  | NA   | NA   | 0.5  |
| chr5 | 136108538 | 136108841 | Rhbdd2        | ENSMUSG00000039917 | 115   | NA   | NA   | 1    | 0.33 | NA   | NA   |
| chr5 | 136363933 | 136364258 | Hspb1         | ENSMUSG00000004951 | 166   | NA   | 1    | 0.05 | NA   | NA   | 0.12 |
| chr5 | 136441392 | 136441741 | Srceb4d       | ENSMUSG00000029699 | 178   | 1    | NA   | NA   | 1    | NA   | NA   |
| chr5 | 136470662 | 136471067 | Dtx2          | ENSMUSG00000004947 | 194   | 0.67 | 1    | 0.25 | 0.2  | NA   | 0.25 |
| chr5 | 136578163 | 136578517 | Rasa4         | ENSMUSG00000004952 | -1424 | NA   | NA   | 0.1  | 0.07 | 0.09 | 0.09 |
| chr5 | 136646380 | 136646608 | Orai2         | ENSMUSG00000039747 | 32    | NA   | NA   | 1    | 1    | NA   | 1    |
| chr5 | 137730288 | 137730492 | Ache          | ENSMUSG00000023328 | 74    | NA   | 0.24 | 0.12 | 0.14 | 0.22 | 0.14 |
| chr5 | 137735643 | 137735869 | Ufsp1         | ENSMUSG00000051502 | -141  | 0.5  | 0.08 | 0.06 | 0.06 | NA   | 0.14 |
| chr5 | 137791290 | 137791840 | Ephb4         | ENSMUSG00000029710 | 228   | NA   | NA   | 0.15 | 0.11 | 0.06 | 0.11 |
| chr5 | 138070158 | 138070800 | Fbxo24        | ENSMUSG00000089984 | -295  | NA   | NA   | 0.11 | 0.18 | 0.27 | 0.22 |
| chr5 | 138182465 | 138183102 | 6430598A04Rik | ENSMUSG00000045348 | 52    | NA   | NA   | NA   | 1    | 1    | NA   |
| chr5 | 138228868 | 138229738 | Zcwpw1        | ENSMUSG00000037108 | 277   | 0.88 | 1    | 0.19 | NA   | NA   | 0.43 |
| chr5 | 138558062 | 138558382 | Zscan21       | ENSMUSG00000037017 | 91    | 1    | 0.17 | 0.13 | 0.11 | NA   | 0.11 |

|      |           |           |               |                    |      |      |      |      |      |      |      |
|------|-----------|-----------|---------------|--------------------|------|------|------|------|------|------|------|
| chr5 | 139820983 | 139821282 | Cox19         | ENSMUSG00000045438 | -53  | 0.11 | NA   | 0.06 | 0.14 | NA   | 0.1  |
| chr5 | 140302527 | 140302977 | Psmg3         | ENSMUSG00000029551 | 45   | NA   | NA   | 0.23 | NA   | NA   | 0.13 |
| chr5 | 140894463 | 140894778 | Eif3b         | ENSMUSG00000056076 | -639 | NA   | NA   | 0.09 | NA   | 0.06 | 0.18 |
| chr5 | 140981445 | 140981714 | Chst12        | ENSMUSG00000036599 | 75   | NA   | NA   | NA   | NA   | NA   | 0.62 |
| chr5 | 143084561 | 143084818 | Mmd2          | ENSMUSG00000039533 | 65   | NA   | 0.86 | 0.09 | 0.17 | 0.26 | 0.15 |
| chr5 | 145522329 | 145522531 | Tmem130       | ENSMUSG00000043388 | 88   | NA   | 0.5  | 0.12 | NA   | 0.37 | NA   |
| chr5 | 147775093 | 147775383 | Mtif3         | ENSMUSG00000016510 | 81   | NA   | 0.13 | 0.09 | 0.16 | 0.07 | 0.19 |
| chr5 | 148673993 | 148674272 | Pomp          | ENSMUSG00000029649 | 1928 | 1    | NA   | NA   | NA   | NA   | NA   |
| chr5 | 150099039 | 150099373 | Alox5ap       | ENSMUSG00000060063 | 215  | NA   | NA   | 1    | NA   | NA   | 0.5  |
| chr6 | 54922323  | 54922709  | Nod1          | ENSMUSG00000038058 | 90   | 0.72 | 0.17 | 0.1  | 0.16 | 0.12 | 0.15 |
| chr6 | 72388912  | 72390040  | Mat2a         | ENSMUSG00000053907 | 57   | 1    | 0.26 | 0.08 | 0.19 | 0.16 | 0.22 |
| chr6 | 125263672 | 125264116 | Ltbr          | ENSMUSG00000030339 | 9    | 0.32 | 0.26 | 0.15 | 0.2  | 0.12 | 0.27 |
| chr6 | 88396039  | 88396692  | Eefsec        | ENSMUSG00000033216 | 156  | 0.36 | 0.16 | 0.09 | 0.13 | 0.1  | 0.08 |
| chr6 | 5446015   | 5446279   | Pdk4          | ENSMUSG00000019577 | 128  | 0.79 | 0.25 | 0.11 | 0.39 | 0.08 | 0.21 |
| chr6 | 4852881   | 4853874   | Ppp1r9a       | ENSMUSG00000032827 | 460  | 0.5  | 0.23 | 0.15 | 0.2  | 0.1  | 0.15 |
| chr6 | 54631424  | 54632372  | 2410066E13Rik | ENSMUSG00000038065 | 164  | 0.59 | 0.35 | 0.11 | 0.21 | 0.16 | 0.17 |
| chr6 | 53767858  | 53771092  | Gm16499       | ENSMUSG00000078169 | -494 | 0.21 | 0.13 | 0.15 | 0.18 | 0.12 | 0.15 |
| chr6 | 8901048   | 8901510   | Nxph1         | ENSMUSG00000046178 | 1603 | 1    | 0.16 | 0.11 | 0.14 | 0.15 | 0.12 |
| chr6 | 122824412 | 122825059 | Necap1        | ENSMUSG00000030327 | 243  | 0.12 | 0.14 | 0.1  | 0.13 | 0.52 | 0.12 |
| chr6 | 86475134  | 86477360  | Pcbp1         | ENSMUSG00000051695 | -82  | 0.24 | 0.12 | 0.11 | 0.15 | 0.11 | 0.17 |
| chr6 | 120442302 | 120444034 | Cecr6         | ENSMUSG00000072800 | 809  | 0.14 | 0.18 | 0.12 | 0.18 | 0.3  | 0.12 |
| chr6 | 39523727  | 39524237  | Adck2         | ENSMUSG00000046947 | 110  | 0.62 | 0.59 | 0.14 | 0.22 | 0.21 | 0.24 |
| chr6 | 124813601 | 124813977 | Gpr162        | ENSMUSG00000038390 | -59  | 0.29 | 0.63 | 0.13 | 0.16 | 0.51 | 0.13 |
| chr6 | 48543725  | 48544310  | Repin1        | ENSMUSG00000052751 | 135  | 0.58 | 0.13 | 0.13 | 0.15 | 0.14 | 0.11 |
| chr6 | 85400976  | 85402279  | 1700040I03Rik | ENSMUSG00000030008 | -432 | 0.37 | 0.18 | 0.11 | 0.12 | 0.08 | 0.23 |
| chr6 | 146526148 | 146526821 | 4933424B01Rik | ENSMUSG00000040250 | -127 | 0.15 | 0.35 | 0.1  | 0.16 | 0.6  | 0.17 |
| chr6 | 7642982   | 7643332   | Asns          | ENSMUSG00000029752 | -47  | 0.14 | 0.36 | 0.16 | 0.2  | 0.4  | 0.13 |
| chr6 | 106749833 | 106750189 | Crbn          | ENSMUSG00000005362 | 44   | 0.27 | 0.09 | 0.07 | 0.09 | 0.1  | 0.13 |
| chr6 | 127403469 | 127404044 | Parp11        | ENSMUSG00000037997 | 114  | 0.68 | 0.17 | 0.12 | 0.18 | 0.19 | 0.16 |
| chr6 | 72848693  | 72850414  | Kcmf1         | ENSMUSG00000055239 | 420  | 0.18 | 0.15 | 0.12 | 0.16 | 0.09 | 0.14 |



|      |           |           |               |                    |      |      |      |      |      |      |      |
|------|-----------|-----------|---------------|--------------------|------|------|------|------|------|------|------|
| chr6 | 17015000  | 17015543  | Tes           | ENSMUSG00000029552 | 122  | 0.32 | 0.22 | 0.08 | 0.1  | 0.06 | 0.15 |
| chr6 | 106719109 | 106719448 | Trnt1         | ENSMUSG00000013736 | 164  | 0.41 | 0.11 | 0.13 | 0.13 | 0.06 | 0.18 |
| chr6 | 51220351  | 51221201  | Mir148a       | ENSMUSG00000065505 | -867 | 0.19 | 0.18 | 0.1  | 0.12 | 0.07 | 0.13 |
| chr6 | 86799538  | 86799934  | Aak1          | ENSMUSG00000057230 | 114  | 0.64 | 0.2  | 0.13 | 0.13 | 0.26 | 0.19 |
| chr6 | 64678985  | 64680256  | Atoh1         | ENSMUSG00000073043 | 480  | 0.5  | 0.22 | 0.11 | 0.14 | 0.13 | 0.24 |
| chr6 | 38586348  | 38587221  | Klrg2         | ENSMUSG00000071537 | 455  | 0.27 | 0.3  | 0.1  | 0.12 | 0.1  | 0.17 |
| chr6 | 140372243 | 140373616 | Plekha5       | ENSMUSG00000030231 | 309  | 0.35 | 0.21 | 0.09 | 0.14 | 0.15 | 0.13 |
| chr6 | 118369187 | 118369867 | Bms1          | ENSMUSG00000030138 | -92  | 0.19 | 0.14 | 0.1  | 0.14 | 0.06 | 0.16 |
| chr6 | 94232819  | 94234752  | Magi1         | ENSMUSG00000045095 | -469 | 0.27 | 0.2  | 0.12 | 0.14 | 0.11 | 0.13 |
| chr6 | 107479688 | 107480205 | Lrrn1         | ENSMUSG00000034648 | 167  | 0.17 | 0.14 | 0.07 | 0.1  | 0.39 | 0.14 |
| chr6 | 97098447  | 97098990  | A130022J15Rik | ENSMUSG00000035245 | 159  | 0.38 | 0.28 | 0.12 | 0.18 | 0.17 | 0.18 |
| chr6 | 90319441  | 90320680  | Zxdc          | ENSMUSG00000034430 | 574  | 0.27 | 0.22 | 0.11 | 0.15 | 0.15 | 0.16 |
| chr6 | 33009887  | 33010308  | Chchd3        | ENSMUSG00000053768 | 120  | 0.5  | 0.38 | 0.1  | 0.17 | 0.13 | 0.15 |
| chr6 | 57774462  | 57775222  | Vopp1         | ENSMUSG00000037788 | -208 | 0.42 | 0.24 | 0.08 | 0.15 | 0.13 | 0.18 |
| chr6 | 56873582  | 56874052  | Nt5c3         | ENSMUSG00000029780 | -4   | 0.3  | 0.22 | 0.08 | 0.12 | 0.08 | 0.14 |
| chr6 | 85282547  | 85283516  | Sfxn5         | ENSMUSG00000033720 | -287 | 0.11 | 0.1  | 0.13 | 0.26 | 0.26 | 0.21 |
| chr6 | 142335359 | 142336146 | Recql         | ENSMUSG00000030243 | -258 | 0.2  | 0.28 | 0.14 | 0.18 | 0.09 | 0.15 |
| chr6 | 63205991  | 63207717  | Grid2         | ENSMUSG00000071424 | 854  | 0.22 | 0.27 | 0.12 | 0.15 | 0.11 | 0.17 |
| chr6 | 100236494 | 100238224 | Rybp          | ENSMUSG00000072872 | 76   | 0.23 | 0.2  | 0.1  | 0.11 | 0.14 | 0.13 |
| chr6 | 13557563  | 13558141  | Tmem168       | ENSMUSG00000029569 | -104 | 0.45 | 0.15 | 0.08 | 0.1  | 0.17 | 0.13 |
| chr6 | 134516818 | 134517448 | Lrp6          | ENSMUSG00000030201 | -202 | 0.19 | 0.17 | 0.14 | 0.15 | 0.09 | 0.11 |
| chr6 | 7794531   | 7795147   | C1galt1       | ENSMUSG00000042460 | -3   | 0.18 | 0.09 | 0.08 | 0.13 | 0.08 | 0.12 |
| chr6 | 83058997  | 83059663  | Gm15605       | ENSMUSG00000087578 | -283 | 0.25 | 0.15 | 0.1  | 0.16 | 0.09 | 0.14 |
| chr6 | 136351570 | 136351793 | E330021D16Rik | ENSMUSG00000045291 | 171  | 0.81 | 0.95 | 0.87 | 0.97 | 0.93 | 0.97 |
| chr6 | 148159941 | 148160952 | Ergic2        | ENSMUSG00000030304 | 53   | 0.9  | 0.42 | 0.13 | 0.2  | 0.32 | 0.14 |
| chr6 | 100783459 | 100784330 | Ppp4r2        | ENSMUSG00000052144 | 262  | 0.3  | 0.15 | 0.08 | 0.11 | 0.16 | 0.14 |
| chr6 | 34730395  | 34731021  | Agbl3         | ENSMUSG00000038836 | 276  | 0.36 | 0.12 | 0.16 | 0.14 | 0.05 | 0.13 |
| chr6 | 86618686  | 86619606  | Mxd1          | ENSMUSG00000001156 | 7    | 0.21 | 0.27 | 0.11 | 0.14 | 0.07 | 0.11 |
| chr6 | 135147893 | 135148398 | 8430419L09Rik | ENSMUSG00000030207 | 150  | 0.15 | 0.09 | 0.08 | 0.13 | 0.06 | 0.12 |
| chr6 | 64992530  | 64993107  | Smarcad1      | ENSMUSG00000029920 | 157  | 0.44 | 0.35 | 0.17 | 0.22 | 0.15 | 0.3  |

|      |           |           |               |                    |      |      |      |      |      |      |      |
|------|-----------|-----------|---------------|--------------------|------|------|------|------|------|------|------|
| chr6 | 17643885  | 17644907  | St7           | ENSMUSG00000029534 | 449  | 0.19 | 0.18 | 0.09 | 0.16 | 0.11 | 0.11 |
| chr6 | 137683457 | 137684123 | Strap         | ENSMUSG00000030224 | 191  | 0.31 | 0.12 | 0.06 | 0.15 | 0.15 | 0.14 |
| chr6 | 13788658  | 13789075  | Gpr85         | ENSMUSG00000048216 | -412 | 0.75 | 0.2  | 0.12 | 0.28 | 0.11 | 0.19 |
| chr6 | 42274106  | 42274859  | Fam131b       | ENSMUSG00000029861 | 109  | 0.26 | 0.17 | 0.14 | 0.16 | 0.09 | 0.15 |
| chr6 | 58856717  | 58857141  | Nap115        | ENSMUSG00000055430 | 191  | 0.52 | 0.45 | 0.47 | 0.44 | 0.29 | 0.54 |
| chr6 | 113026295 | 113027805 | Gt(ROSA)26Sor | ENSMUSG00000086429 | 121  | 0.23 | 0.32 | 0.12 | 0.16 | 0.13 | 0.13 |
| chr6 | 71582069  | 71583570  | Kdm3a         | ENSMUSG00000053470 | -139 | 1    | 0.33 | 0.16 | 0.25 | 0.2  | 0.26 |
| chr6 | 124807004 | 124807744 | Leprel2       | ENSMUSG00000023191 | 373  | 0.12 | 0.09 | 0.09 | 0.12 | 0.05 | 0.12 |
| chr6 | 113233112 | 113233407 | Cpne9         | ENSMUSG00000030270 | 900  | 0.48 | 0.16 | 0.31 | 0.28 | 0.08 | 0.22 |
| chr6 | 125081635 | 125082312 | Nop2          | ENSMUSG00000038279 | 72   | 0.5  | 0.12 | 0.1  | 0.52 | 0.06 | 0.22 |
| chr6 | 54987872  | 54988418  | Gars          | ENSMUSG00000029777 | 150  | 0.17 | 0.67 | 0.12 | 0.47 | 0.83 | 0.1  |
| chr6 | 113276701 | 113277007 | Gm15492       | ENSMUSG00000085012 | -113 | 0.73 | 0.6  | 0.11 | 0.24 | 0.29 | 0.16 |
| chr6 | 137597189 | 137597883 | Eps8          | ENSMUSG00000015766 | 185  | 0.28 | 0.18 | 0.12 | 0.11 | 0.15 | 0.17 |
| chr6 | 82723246  | 82724812  | Hk2           | ENSMUSG0000000628  | -672 | 0.31 | 0.21 | 0.14 | 0.17 | 0.13 | 0.2  |
| chr6 | 133984957 | 133986290 | Etv6          | ENSMUSG00000030199 | -95  | 0.11 | 0.11 | 0.11 | 0.12 | 0.24 | 0.17 |
| chr6 | 47544208  | 47545635  | Ezh2          | ENSMUSG00000029687 | 108  | 0.3  | 0.24 | 0.12 | 0.2  | 0.12 | 0.16 |
| chr6 | 48395274  | 48395644  | Zfp467        | ENSMUSG00000068551 | -102 | 1    | 0.29 | 0.16 | 0.19 | 0.26 | 0.18 |
| chr6 | 51418853  | 51421251  | Hnrmpa2b1     | ENSMUSG00000004980 | -159 | 0.2  | 0.15 | 0.14 | 0.16 | 0.1  | 0.16 |
| chr6 | 47403876  | 47405200  | Cul1          | ENSMUSG00000029686 | 635  | 0.18 | 0.11 | 0.09 | 0.12 | 0.12 | 0.11 |
| chr6 | 125141416 | 125142193 | Ncapd2        | ENSMUSG00000038252 | -191 | 0.44 | 0.27 | 0.11 | 0.14 | 0.12 | 0.14 |
| chr6 | 88148410  | 88149824  | Gata2         | ENSMUSG00000015053 | 459  | 0.13 | 0.18 | 0.12 | 0.12 | 0.08 | 0.11 |
| chr6 | 120866408 | 120866993 | Bid           | ENSMUSG00000004446 | 116  | 0.35 | 0.15 | 0.09 | 0.17 | 0.11 | 0.14 |
| chr6 | 50516266  | 50516887  | Cycs          | ENSMUSG00000063694 | -39  | 0.21 | 0.62 | 0.16 | 0.27 | 0.46 | 0.15 |
| chr6 | 113327515 | 113328612 | Tada3         | ENSMUSG00000048930 | -330 | 0.34 | 0.34 | 0.17 | 0.2  | 0.21 | 0.17 |
| chr6 | 49163758  | 49165543  | Igf2bp3       | ENSMUSG00000029814 | 303  | 0.15 | 0.2  | 0.12 | 0.17 | 0.09 | 0.16 |
| chr6 | 38203804  | 38204565  | D630045J12Rik | ENSMUSG00000063455 | -175 | 0.17 | 0.12 | 0.1  | 0.17 | 0.1  | 0.16 |
| chr6 | 83027877  | 83028787  | Pcgf1         | ENSMUSG00000069678 | -8   | 0.4  | 0.13 | 0.1  | 0.15 | 0.16 | 0.16 |
| chr6 | 113144941 | 113145329 | Lhfpl4        | ENSMUSG00000042873 | 243  | 0.21 | 0.14 | 0.11 | 0.13 | 0.07 | 0.11 |
| chr6 | 35127410  | 35128159  | Nup205        | ENSMUSG00000038759 | 339  | 0.16 | 0.08 | 0.11 | 0.15 | 0.09 | 0.12 |
| chr6 | 119125158 | 119125738 | Dcp1b         | ENSMUSG00000041477 | 178  | 0.17 | 0.09 | 0.1  | 0.15 | 0.06 | 0.14 |

|      |           |           |               |                     |      |      |      |      |      |      |      |
|------|-----------|-----------|---------------|---------------------|------|------|------|------|------|------|------|
| chr6 | 38612933  | 38613382  | Clec2l        | ENSMUSG00000079598  | 88   | 0.15 | 0.06 | 0.08 | 0.11 | 0.08 | 0.11 |
| chr6 | 85324011  | 85324646  | Rab11fip5     | ENSMUSG00000051343  | 300  | 0.35 | 0.33 | 0.16 | 0.2  | 0.18 | 0.18 |
| chr6 | 38303832  | 38304843  | Zc3hav1       | ENSMUSG00000029826  | -64  | 0.41 | 0.27 | 0.14 | 0.17 | 0.14 | 0.14 |
| chr6 | 120772446 | 120772870 | Atp6v1e1      | ENSMUSG00000019210  | 45   | 0.67 | 0.14 | 0.1  | 0.16 | 0.15 | 0.16 |
| chr6 | 83712845  | 83713283  | Ankrd53       | ENSMUSG00000014747  | 204  | 0.46 | NA   | 0.37 | 1    | 0.83 | 0.34 |
| chr6 | 113841260 | 113841556 | Atp2b2        | ENSMUSG00000030302  | -44  | 0.37 | 0.5  | 0.08 | 0.11 | 0.16 | 0.12 |
| chr6 | 122769766 | 122770332 | Foxj2         | ENSMUSG00000003154  | 117  | 0.19 | 0.23 | 0.1  | 0.12 | 0.1  | 0.14 |
| chr6 | 128093297 | 128093591 | Tspan9        | ENSMUSG00000030352  | 127  | 0.26 | 0.3  | 0.11 | 0.15 | 0.14 | 0.15 |
| chr6 | 12698826  | 12699436  | Thsd7a        | ENSMUSG00000032625  | 122  | 0.11 | 0.26 | 0.1  | 0.14 | 0.24 | 0.18 |
| chr6 | 65728876  | 65729332  | Prdm5         | ENSMUSG00000029913  | 122  | 0.19 | 0.17 | 0.12 | 0.18 | 0.1  | 0.18 |
| chr6 | 89311666  | 89313160  | Plxna1        | ENSMUSG00000030084  | 194  | 0.13 | 0.1  | 0.09 | 0.13 | 0.07 | 0.1  |
| chr6 | 72184368  | 72185593  | Atoh8         | ENSMUSG00000037621  | 591  | 0.19 | 0.21 | 0.09 | 0.14 | 0.13 | 0.14 |
| chr6 | 13019762  | 13020109  | Tmem106b      | ENSMUSG00000029571  | 119  | 0.14 | 0.26 | 0.07 | 0.14 | 0.07 | 0.09 |
| chr6 | 57652747  | 57653375  | Lanc12        | ENSMUSG00000062190  | 16   | 0.21 | 0.12 | 0.06 | 0.11 | 0.07 | 0.12 |
| chr6 | 113646822 | 113648030 | Tatdn2        | ENSMUSG00000056952  | 382  | 0.28 | 0.13 | 0.12 | 0.18 | 0.17 | 0.2  |
| chr6 | 82602523  | 82603211  | Pole4         | ENSMUSG00000030042  | -3   | 0.11 | 0.27 | 0.16 | 0.17 | 0.28 | 0.12 |
| chr6 | 83267273  | 83267634  | Mthfd2        | ENSMUSG00000005667  | 147  | 0.08 | 0.21 | 0.1  | 0.12 | 0.22 | 0.09 |
| chr6 | 88824235  | 88825226  | Podxl2        | ENSMUSG00000033152  | -359 | 0.14 | 0.08 | 0.08 | 0.12 | 0.07 | 0.17 |
| chr6 | 88674233  | 88675136  | Mgll          | ENSMUSG00000033174  | 278  | 0.13 | 0.11 | 0.07 | 0.1  | 0.05 | 0.11 |
| chr6 | 71443742  | 71444653  | Rnf103        | ENSMUSG00000052656  | 309  | 0.1  | 0.09 | 0.07 | 0.11 | 0.06 | 0.12 |
| chr6 | 134869943 | 134871282 | Cdkn1b        | ENSMUSG00000030331  | 193  | 0.47 | 0.11 | 0.12 | 0.16 | 0.19 | 0.18 |
| chr6 | 125114819 | 125115765 | Gapdh         | ENSMUSG000000057666 | -358 | 0.26 | 0.1  | 0.12 | 0.17 | 0.07 | 0.11 |
| chr6 | 47870657  | 47870986  | Zfp212        | ENSMUSG000000052763 | 346  | 0.13 | 0.25 | 0.09 | 0.16 | 0.07 | 0.12 |
| chr6 | 72297211  | 72297716  | 0610030E20Rik | ENSMUSG000000058706 | 152  | 0.17 | 0.24 | 0.09 | 0.24 | 0.1  | 0.18 |
| chr6 | 120413193 | 120413852 | Il17ra        | ENSMUSG00000002897  | 307  | 0.07 | 0.11 | 0.07 | 0.15 | 0.11 | 0.11 |
| chr6 | 24905038  | 24906261  | Tmem229a      | ENSMUSG000000090045 | 91   | 0.09 | 0.11 | 0.1  | 0.16 | 0.14 | 0.1  |
| chr6 | 29114556  | 29114852  | Rbm28         | ENSMUSG00000029701  | 302  | 0.18 | 0.07 | 0.08 | 0.11 | 0.08 | 0.1  |
| chr6 | 99828141  | 99828428  | Tpt1-ps3      | ENSMUSG000000084319 | 44   | 0.98 | 0.98 | 0.95 | 0.95 | 0.89 | 0.96 |
| chr6 | 124779269 | 124779632 | Usp5          | ENSMUSG000000038429 | -24  | 0.31 | 0.28 | 0.18 | 0.22 | 0.08 | 0.12 |
| chr6 | 146673322 | 146674142 | Stk38l        | ENSMUSG00000001630  | 215  | 0.5  | 0.32 | 0.22 | 0.19 | 0.3  | 0.22 |

|      |           |           |               |                     |       |      |      |      |      |      |      |
|------|-----------|-----------|---------------|---------------------|-------|------|------|------|------|------|------|
| chr6 | 55067384  | 55068150  | Crrh2         | ENSMUSG00000003476  | -2    | 0.11 | 0.18 | 0.1  | 0.15 | 0.22 | 0.11 |
| chr6 | 81873603  | 81874022  | AW146020      | ENSMUSG000000035125 | 149   | 0.1  | 0.11 | 0.09 | 0.18 | 0.16 | 0.12 |
| chr6 | 34827747  | 34828253  | 3110062M04Rik | ENSMUSG000000046806 | 9     | 0.17 | 0.14 | 0.12 | 0.18 | 0.06 | 0.18 |
| chr6 | 88146370  | 88147395  | Gata2         | ENSMUSG000000015053 | -1776 | 1    | 0.22 | 0.24 | 0.28 | 0.34 | 0.28 |
| chr6 | 89593925  | 89594736  | Txnrd3        | ENSMUSG000000000811 | 348   | 0.19 | 0.19 | 0.1  | 0.14 | 0.11 | 0.12 |
| chr6 | 112996129 | 112996609 | Thumpd3       | ENSMUSG000000030264 | 150   | 0.11 | 0.21 | 0.13 | 0.14 | 0.04 | 0.12 |
| chr6 | 116158006 | 116158509 | D6Wsu116e     | ENSMUSG000000024104 | 206   | 0.68 | 0.65 | 0.18 | 0.19 | 0.37 | 0.23 |
| chr6 | 131338228 | 131338634 | Csda          | ENSMUSG000000030189 | -200  | 0.1  | 0.07 | 0.08 | 0.12 | 0.04 | 0.09 |
| chr6 | 56747248  | 56747869  | Kbtbd2        | ENSMUSG000000059486 | -285  | 0.1  | 0.09 | 0.07 | 0.1  | 0.06 | 0.12 |
| chr6 | 59158728  | 59159151  | Tigd2         | ENSMUSG000000049232 | 75    | 0.13 | 0.13 | 0.12 | 0.12 | 0.07 | 0.13 |
| chr6 | 118088885 | 118089273 | Csgalnact2    | ENSMUSG000000042042 | 79    | 0.36 | 0.64 | 0.18 | 0.45 | 0.16 | 0.22 |
| chr6 | 101327164 | 101328081 | Pdzrn3        | ENSMUSG000000035357 | -286  | 0.19 | 0.05 | 0.07 | 0.12 | 0.08 | 0.11 |
| chr6 | 124661939 | 124662824 | Emg1          | ENSMUSG000000004268 | -294  | 0.09 | 0.28 | 0.09 | 0.14 | 0.21 | 0.14 |
| chr6 | 8898489   | 8899356   | Nxph1         | ENSMUSG000000046178 | 308   | 0.23 | 0.15 | 0.1  | 0.14 | 0.1  | 0.13 |
| chr6 | 50405485  | 50406117  | Osbpl3        | ENSMUSG000000029822 | 343   | 0.18 | 0.07 | 0.09 | 0.12 | 0.1  | 0.16 |
| chr6 | 83065389  | 83065897  | Mogs          | ENSMUSG000000030036 | 153   | 0.26 | 0.18 | 0.09 | 0.15 | 0.15 | 0.12 |
| chr6 | 88034332  | 88035113  | Rpn1          | ENSMUSG000000030062 | 255   | 0.31 | 0.37 | 0.09 | 0.18 | 0.09 | 0.12 |
| chr6 | 128250230 | 128250966 | Tead4         | ENSMUSG000000030353 | 158   | 0.17 | 0.11 | 0.13 | 0.15 | 0.1  | 0.14 |
| chr6 | 87930357  | 87931982  | Gm5577        | ENSMUSG000000084950 | 292   | 0.17 | 0.16 | 0.1  | 0.13 | 0.12 | 0.13 |
| chr6 | 52590047  | 52590482  | Hibadh        | ENSMUSG000000029776 | 92    | 0.33 | 0.41 | 0.13 | 0.16 | 0.1  | 0.13 |
| chr6 | 31166144  | 31166980  | AB041803      | ENSMUSG000000044471 | 1871  | 0.45 | 0.25 | 0.12 | 0.15 | 0.11 | 0.16 |
| chr6 | 30253905  | 30254610  | Ube2h         | ENSMUSG000000039159 | 265   | 0.45 | 0.18 | 0.11 | 0.18 | 0.17 | 0.19 |
| chr6 | 84055590  | 84055965  | Dysf          | ENSMUSG000000033788 | 410   | 0.25 | 0.25 | 0.23 | 0.14 | 0.06 | 0.13 |
| chr6 | 119987071 | 119988876 | Wnk1          | ENSMUSG000000045962 | -296  | 0.07 | 0.09 | 0.1  | 0.13 | 0.12 | 0.13 |
| chr6 | 81915591  | 81915890  | Mrpl19        | ENSMUSG000000030045 | -105  | 0.38 | 0.31 | 0.11 | 0.14 | 0.63 | 0.15 |
| chr6 | 143115359 | 143116477 | Etnk1         | ENSMUSG000000030275 | 168   | 0.31 | 0.25 | 0.11 | 0.15 | 0.23 | 0.16 |
| chr6 | 97128796  | 97129369  | Tmf1          | ENSMUSG000000030059 | -51   | 0.12 | 0.14 | 0.08 | 0.13 | 0.06 | 0.1  |
| chr6 | 88468499  | 88469150  | Sec61a1       | ENSMUSG000000030082 | -57   | 0.18 | 0.12 | 0.11 | 0.15 | 0.13 | 0.11 |
| chr6 | 91928780  | 91929166  | Fgd5          | ENSMUSG000000034037 | 101   | 0.22 | 0.19 | 0.12 | 0.15 | 0.1  | 0.1  |
| chr6 | 115803308 | 115803825 | Mbd4          | ENSMUSG000000030322 | -183  | 0.2  | NA   | 0.07 | 0.17 | 0.08 | 0.13 |

|      |           |           |               |                    |      |      |      |      |      |      |      |
|------|-----------|-----------|---------------|--------------------|------|------|------|------|------|------|------|
| chr6 | 30846366  | 30846954  | Copg2         | ENSMUSG00000025607 | -234 | 0.33 | 0.27 | 0.12 | 0.13 | 0.2  | 0.12 |
| chr6 | 39507240  | 39508083  | Dennd2a       | ENSMUSG00000038456 | 205  | 0.12 | 0.16 | 0.11 | 0.15 | 0.07 | 0.14 |
| chr6 | 48035915  | 48036846  | Zfp746        | ENSMUSG00000057691 | 212  | 0.1  | 0.14 | 0.11 | 0.11 | 0.07 | 0.14 |
| chr6 | 88851952  | 88852754  | Tpra1         | ENSMUSG00000002871 | 108  | 0.19 | 0.05 | 0.11 | 0.16 | 0.11 | 0.1  |
| chr6 | 134582126 | 134582616 | Mansc1        | ENSMUSG00000032718 | 135  | 0.15 | 0.15 | 0.19 | 0.22 | 0.06 | 0.14 |
| chr6 | 28210940  | 28212310  | Zfp800        | ENSMUSG00000039841 | 286  | 0.13 | 0.12 | 0.1  | 0.14 | 0.1  | 0.1  |
| chr6 | 47827365  | 47828155  | Zfp282        | ENSMUSG00000025821 | 105  | 0.57 | 0.38 | 0.15 | 0.19 | 0.42 | 0.13 |
| chr6 | 143047978 | 143048868 | 5730419109Rik | ENSMUSG00000030279 | 204  | 0.21 | 0.4  | 0.12 | 0.17 | 0.35 | 0.09 |
| chr6 | 38383598  | 38384970  | Ubn2          | ENSMUSG00000038538 | 359  | 0.18 | 0.2  | 0.1  | 0.17 | 0.12 | 0.12 |
| chr6 | 83864259  | 83865007  | Zfml          | ENSMUSG00000030016 | 286  | 0.16 | 0.11 | 0.07 | 0.13 | 0.09 | 0.13 |
| chr6 | 99676173  | 99676735  | Prok2         | ENSMUSG00000030069 | -68  | 0.21 | 0.12 | 0.16 | 0.1  | 0.07 | 0.15 |
| chr6 | 124612458 | 124613354 | Lpcat3        | ENSMUSG00000004270 | -139 | 1    | 0.67 | 0.18 | 0.32 | 0.57 | 0.23 |
| chr6 | 54545053  | 54545800  | Plekha8       | ENSMUSG00000005225 | 321  | 0.15 | 0.31 | 0.11 | 0.12 | 0.08 | 0.14 |
| chr6 | 146991262 | 146991764 | Mrps35        | ENSMUSG00000040112 | 227  | 0.14 | 0.1  | 0.05 | 0.14 | 0.07 | 0.12 |
| chr6 | 84538980  | 84539345  | Cyp26b1       | ENSMUSG00000063415 | -530 | 0.11 | 0.24 | 0.09 | 0.14 | 0.3  | 0.13 |
| chr6 | 29718611  | 29719235  | Ahcyl2        | ENSMUSG00000029772 | 395  | 0.33 | 0.27 | 0.18 | 0.15 | 0.12 | 0.19 |
| chr6 | 118146642 | 118147373 | Ret           | ENSMUSG00000030110 | 340  | 0.09 | 0.1  | 0.11 | 0.14 | 0.06 | 0.09 |
| chr6 | 8459075   | 8460376   | A430035B10Rik | ENSMUSG00000087305 | -647 | 0.11 | 0.17 | 0.08 | 0.12 | 0.07 | 0.11 |
| chr6 | 85026189  | 85026468  | Npm3-ps1      | ENSMUSG00000081669 | 142  | 0.87 | 0.82 | 0.35 | 0.36 | 0.74 | 0.36 |
| chr6 | 86634344  | 86634596  | Snmp27        | ENSMUSG00000001158 | 15   | 0.2  | 0.33 | 0.12 | 0.19 | 0.08 | 0.17 |
| chr6 | 87863897  | 87864612  | 8430410A17Rik | ENSMUSG00000030060 | 325  | 0.11 | 0.62 | 0.2  | 0.13 | 0.54 | 0.33 |
| chr6 | 95668292  | 95668765  | Suclg2        | ENSMUSG00000061838 | 264  | 0.24 | 0.18 | 0.1  | 0.13 | 0.1  | 0.11 |
| chr6 | 120313849 | 120314897 | Kdm5a         | ENSMUSG00000030180 | 256  | 0.17 | 0.13 | 0.09 | 0.16 | 0.11 | 0.12 |
| chr6 | 145695427 | 145695993 | Rassf8        | ENSMUSG00000030259 | 442  | 0.17 | 0.17 | 0.11 | 0.17 | 0.06 | 0.15 |
| chr6 | 149049213 | 149050388 | Dennd5b       | ENSMUSG00000030313 | 260  | 0.17 | 0.11 | 0.08 | 0.15 | 0.13 | 0.15 |
| chr6 | 6810760   | 6810979   | Dlx6as1       | ENSMUSG00000090063 | 779  | 0.07 | 0.08 | 0.15 | 0.19 | 0.17 | 0.14 |
| chr6 | 85087403  | 85087925  | Spr           | ENSMUSG00000033735 | 86   | 0.18 | 0.17 | 0.16 | 0.15 | 0.35 | 0.13 |
| chr6 | 112646296 | 112646807 | Rad18         | ENSMUSG00000030254 | 47   | 0.13 | 0.15 | 0.1  | 0.13 | 0.09 | 0.13 |
| chr6 | 113554503 | 113555202 | 6720456B07Rik | ENSMUSG00000033940 | 86   | 0.16 | 0.22 | 0.13 | 0.17 | 0.08 | 0.17 |
| chr6 | 119493553 | 119494633 | Wnt5b         | ENSMUSG00000030170 | 243  | 0.15 | 0.15 | 0.09 | 0.16 | 0.11 | 0.13 |

|      |           |           |               |                    |      |      |      |      |      |      |      |
|------|-----------|-----------|---------------|--------------------|------|------|------|------|------|------|------|
| chr6 | 125095392 | 125096044 | Iffo1         | ENSMUSG00000038271 | -101 | 0.26 | 0.32 | 0.11 | 0.16 | 0.16 | 0.12 |
| chr6 | 136278547 | 136278760 | Gm8994        | ENSMUSG00000060782 | 114  | 1    | 0.85 | 0.8  | 0.89 | 0.9  | 0.97 |
| chr6 | 115626077 | 115626864 | D830050J10Rik | ENSMUSG00000055396 | 309  | 0.23 | 0.25 | 0.13 | 0.2  | 0.14 | 0.11 |
| chr6 | 21801581  | 21802160  | Tspan12       | ENSMUSG00000029669 | 44   | 0.27 | 0.16 | 0.13 | 0.14 | 0.09 | 0.17 |
| chr6 | 29297829  | 29298444  | Calu          | ENSMUSG00000029767 | 67   | 0.16 | 0.14 | 0.09 | 0.18 | 0.09 | 0.13 |
| chr6 | 32537226  | 32538222  | Plxna4        | ENSMUSG00000029765 | 468  | 0.07 | 0.22 | 0.12 | 0.15 | 0.11 | 0.12 |
| chr6 | 35489177  | 35489991  | Mtpn          | ENSMUSG00000029840 | 304  | 0.22 | 0.27 | 0.14 | 0.32 | 0.1  | 0.18 |
| chr6 | 38248725  | 38249328  | Zc3hav1l      | ENSMUSG00000047749 | 233  | 0.36 | 0.4  | 0.29 | 0.22 | 0.17 | 0.36 |
| chr6 | 47785578  | 47786374  | Zfp398        | ENSMUSG00000062519 | 316  | 0.2  | 0.12 | 0.12 | 0.12 | 0.14 | 0.12 |
| chr6 | 65621467  | 65623031  | A930038C07Rik | ENSMUSG00000049001 | 665  | 0.19 | 0.18 | 0.13 | 0.24 | 0.29 | 0.15 |
| chr6 | 71493825  | 71494409  | Chmp3         | ENSMUSG00000053119 | 271  | 0.13 | 0.09 | 0.13 | 0.14 | 0.07 | 0.16 |
| chr6 | 76447800  | 76448097  | Gm9008        | ENSMUSG00000072476 | -170 | 0.96 | 0.94 | 0.97 | 0.99 | 1    | 0.98 |
| chr6 | 21164451  | 21165805  | Kcnd2         | ENSMUSG00000060882 | -375 | 0.2  | 0.26 | 0.14 | 0.14 | 0.13 | 0.14 |
| chr6 | 52127162  | 52127665  | 5730596B20Rik | ENSMUSG00000056468 | -84  | 0.17 | 0.1  | 0.12 | 0.24 | 0.05 | 0.12 |
| chr6 | 52209985  | 52211192  | Hoxa13        | ENSMUSG00000038203 | 208  | 0.2  | 0.18 | 0.09 | 0.16 | 0.13 | 0.13 |
| chr6 | 89545235  | 89545678  | Chchd6        | ENSMUSG00000030086 | 142  | 0.2  | 0.22 | 0.12 | 0.2  | 0.13 | 0.12 |
| chr6 | 115084860 | 115085555 | Syn2          | ENSMUSG00000009394 | 287  | 0.12 | 0.1  | 0.07 | 0.1  | 0.09 | 0.11 |
| chr6 | 118405126 | 118405585 | Zfp248        | ENSMUSG00000030145 | 82   | 0.15 | 1    | 0.09 | 0.19 | 0.08 | 0.12 |
| chr6 | 52663663  | 52664152  | Tax1bp1       | ENSMUSG0000004535  | 184  | 0.16 | 0.1  | 0.09 | 0.1  | 0.11 | 0.11 |
| chr6 | 87760989  | 87762366  | Rab43         | ENSMUSG00000030055 | 95   | 0.08 | 0.17 | 0.12 | 0.14 | 0.11 | 0.15 |
| chr6 | 91066396  | 91067004  | Nup210        | ENSMUSG00000030091 | 113  | 0.13 | 0.26 | 0.11 | 0.12 | 0.08 | 0.13 |
| chr6 | 52263441  | 52264297  | Evx1          | ENSMUSG0000005503  | 377  | 0.18 | 0.34 | 0.13 | 0.17 | 0.11 | 0.16 |
| chr6 | 126689275 | 126690544 | Kcna6         | ENSMUSG00000038077 | 260  | 0.24 | 0.39 | 0.16 | 0.33 | 0.35 | 0.23 |
| chr6 | 11875808  | 11876508  | Phf14         | ENSMUSG00000029629 | 277  | 0.11 | 0.33 | 0.14 | 0.15 | 0.04 | 0.17 |
| chr6 | 83071845  | 83072339  | Wbp1          | ENSMUSG00000030035 | -539 | 0.14 | 0.12 | 0.09 | 0.13 | 0.09 | 0.1  |
| chr6 | 90666268  | 90666605  | Iqsec1        | ENSMUSG00000034312 | 87   | 0.11 | 0.46 | 0.13 | 0.19 | 0.18 | 0.2  |
| chr6 | 94649243  | 94650441  | Lrig1         | ENSMUSG00000030029 | 89   | 0.11 | 0.11 | 0.07 | 0.11 | 0.08 | 0.11 |
| chr6 | 54766478  | 54767537  | Znrf2         | ENSMUSG00000058446 | 97   | 0.16 | 0.16 | 0.1  | 0.16 | 0.2  | 0.14 |
| chr6 | 85452718  | 85453106  | Fbxo41        | ENSMUSG00000047013 | -60  | 0.23 | 0.24 | 0.12 | 0.13 | 0.14 | 0.15 |
| chr6 | 117791088 | 117791508 | Zfp637        | ENSMUSG00000059689 | 100  | 0.06 | 0.11 | 0.08 | 0.14 | 0.1  | 0.1  |

|      |           |           |          |                    |      |      |      |      |      |      |      |
|------|-----------|-----------|----------|--------------------|------|------|------|------|------|------|------|
| chr6 | 120243958 | 120244820 | B4galnt3 | ENSMUSG00000041372 | 183  | 0.13 | 0.16 | 0.1  | 0.14 | 0.17 | 0.12 |
| chr6 | 22825317  | 22825918  | Ptprz1   | ENSMUSG00000068748 | 115  | 0.21 | 0.12 | 0.09 | 0.14 | 0.08 | 0.1  |
| chr6 | 115943411 | 115944776 | Plxnd1   | ENSMUSG00000030123 | 930  | 0.12 | 0.2  | 0.1  | 0.15 | 0.09 | 0.14 |
| chr6 | 39369578  | 39370547  | Mkrm1    | ENSMUSG00000029922 | -306 | 0.12 | 0.24 | 0.09 | 0.1  | 0.22 | 0.19 |
| chr6 | 87285207  | 87285714  | Antxr1   | ENSMUSG00000033420 | 309  | 0.16 | 0.12 | 0.09 | 0.12 | 0.09 | 0.14 |
| chr6 | 113574001 | 113574539 | Vhl      | ENSMUSG00000033933 | 317  | 0.18 | 0.3  | 0.12 | 0.17 | 0.1  | 0.11 |
| chr6 | 6166759   | 6167226   | Slc25a13 | ENSMUSG00000015112 | 181  | 0.19 | 0.09 | 0.07 | 0.14 | 0.11 | 0.12 |
| chr6 | 52171351  | 52171914  | Hoxa7    | ENSMUSG00000038236 | 221  | 1    | 0.21 | 0.15 | 0.34 | 0.1  | 0.19 |
| chr6 | 86992256  | 86993081  | Gfpt1    | ENSMUSG00000029992 | -172 | 0.13 | 0.1  | 0.07 | 0.09 | 0.05 | 0.14 |
| chr6 | 108090199 | 108090501 | Gm4604   | ENSMUSG00000091845 | 153  | 0.97 | 0.92 | 0.93 | 1    | 0.9  | 1    |
| chr6 | 51962221  | 51962798  | Skap2    | ENSMUSG00000059182 | 39   | 0.25 | 0.23 | 0.14 | 0.2  | 0.18 | 0.15 |
| chr6 | 83299332  | 83299626  | Bola3    | ENSMUSG00000045160 | 39   | 0.14 | 0.19 | 0.08 | 0.07 | 0.1  | 0.09 |
| chr6 | 42299549  | 42300531  | Zyx      | ENSMUSG00000029860 | 213  | 0.21 | 0.15 | 0.08 | 0.2  | 0.15 | 0.11 |
| chr6 | 86682751  | 86683588  | Gmcl1    | ENSMUSG0000001157  | 65   | 0.12 | 0.22 | 0.11 | 0.17 | 0.16 | 0.15 |
| chr6 | 124880996 | 124881886 | Mif2     | ENSMUSG00000030120 | 35   | 0.13 | 0.21 | 0.1  | 0.13 | 0.08 | 0.18 |
| chr6 | 39674925  | 39675644  | Braf     | ENSMUSG00000002413 | -92  | 0.21 | 0.92 | 0.28 | 0.16 | 0.38 | 0.31 |
| chr6 | 52184021  | 52185087  | Hoxa10   | ENSMUSG00000000938 | 384  | 0.56 | 0.44 | 0.11 | 0.2  | 0.38 | 0.2  |
| chr6 | 70741751  | 70742379  | Rpia     | ENSMUSG00000053604 | -68  | 0.22 | 0.14 | 0.08 | 0.13 | 0.11 | 0.15 |
| chr6 | 116578538 | 116579040 | Zfp422   | ENSMUSG00000059878 | -70  | 0.15 | 0.17 | 0.1  | 0.13 | 0.1  | 0.14 |
| chr6 | 17586840  | 17587325  | Capza2   | ENSMUSG00000015733 | 99   | 0.18 | 0.31 | 0.08 | 0.11 | 0.12 | 0.14 |
| chr6 | 28930917  | 28931694  | Gm3294   | ENSMUSG00000092090 | -329 | 0.14 | 0.25 | 0.12 | 0.17 | 0.07 | 0.15 |
| chr6 | 52195219  | 52196576  | Hoxa11as | ENSMUSG00000086427 | 655  | 0.26 | 0.2  | 0.12 | 0.24 | 0.16 | 0.18 |
| chr6 | 113481376 | 113481733 | Tmem111  | ENSMUSG00000030286 | 78   | 1    | 0.16 | 0.09 | 0.21 | 0.07 | 0.1  |
| chr6 | 87800397  | 87801328  | Cnbp     | ENSMUSG00000030057 | 126  | 0.1  | 0.19 | 0.08 | 0.13 | 0.21 | 0.14 |
| chr6 | 115724538 | 115724752 | Cand2    | ENSMUSG00000030319 | 89   | 1    | NA   | 0.14 | 0.2  | 0.36 | 0.22 |
| chr6 | 37249800  | 37250061  | Dgki     | ENSMUSG00000038665 | 44   | 0.47 | 0.32 | 0.09 | 0.21 | 0.6  | 0.11 |
| chr6 | 52153744  | 52154842  | Hoxa5    | ENSMUSG00000038253 | 293  | 0.07 | 0.09 | 0.1  | 0.19 | 0.1  | 0.13 |
| chr6 | 58781475  | 58781994  | Herc3    | ENSMUSG00000029804 | 237  | 0.11 | 0.06 | 0.06 | 0.11 | 0.05 | 0.13 |
| chr6 | 91360961  | 91361533  | Wnt7a    | ENSMUSG00000030093 | 110  | 0.29 | 0.16 | 0.11 | 0.13 | 0.2  | 0.12 |
| chr6 | 114081075 | 114081730 | Slc6a11  | ENSMUSG00000030307 | 167  | 0.35 | 0.36 | 0.1  | 0.08 | 0.24 | 0.19 |

|      |           |           |               |                    |      |      |      |      |      |      |      |
|------|-----------|-----------|---------------|--------------------|------|------|------|------|------|------|------|
| chr6 | 31513377  | 31514076  | Podxl         | ENSMUSG00000025608 | 211  | 0.22 | 0.12 | 0.07 | 0.16 | 0.16 | 0.13 |
| chr6 | 70906185  | 70907287  | Foxi3         | ENSMUSG00000055874 | 211  | 0.25 | 0.14 | 0.1  | 0.11 | 0.18 | 0.11 |
| chr6 | 83074896  | 83075198  | Ino80b        | ENSMUSG00000030034 | -24  | 0.21 | 0.22 | 0.16 | 0.21 | 0.14 | 0.19 |
| chr6 | 113991658 | 113991924 | Atp2b2        | ENSMUSG00000030302 | 218  | 0.21 | 0.23 | 0.12 | 0.19 | 0.1  | 0.14 |
| chr6 | 34860614  | 34860925  | Wdr91         | ENSMUSG00000058486 | -107 | 0.08 | 0.07 | 0.09 | 0.11 | 0.02 | 0.15 |
| chr6 | 56664826  | 56665538  | Avl9          | ENSMUSG00000029787 | 261  | 0.12 | 0.11 | 0.11 | 0.11 | 0.09 | 0.14 |
| chr6 | 91422973  | 91424071  | Chchd4        | ENSMUSG00000034203 | -105 | 0.57 | 0.25 | 0.1  | 0.12 | 0.25 | 0.18 |
| chr6 | 17790455  | 17790718  | St7           | ENSMUSG00000029534 | 49   | 0.96 | 0.92 | 0.89 | 0.94 | 0.91 | 0.81 |
| chr6 | 115494573 | 115494886 | Tsen2         | ENSMUSG00000042389 | 47   | 0.29 | 0.17 | 0.18 | 0.29 | 1    | 0.24 |
| chr6 | 117118410 | 117119415 | Cxcl12        | ENSMUSG00000061353 | 359  | 0.32 | 0.23 | 0.1  | 0.2  | 0.25 | 0.15 |
| chr6 | 72294880  | 72295312  | Usp39         | ENSMUSG00000056305 | 82   | 0.14 | 0.17 | 0.12 | 0.16 | 0.18 | 0.14 |
| chr6 | 88143555  | 88144592  | Gata2         | ENSMUSG00000015053 | 188  | 0.12 | 0.25 | 0.13 | 0.23 | 0.17 | 0.17 |
| chr6 | 30351585  | 30352419  | Klhdc10       | ENSMUSG00000029775 | 134  | 0.33 | 0.28 | 0.13 | 0.25 | 0.47 | 0.12 |
| chr6 | 90413523  | 90413790  | Klf15         | ENSMUSG00000030087 | 1086 | 0.18 | 0.08 | 0.09 | 0.14 | 0.27 | 0.21 |
| chr6 | 25639798  | 25640221  | Gpr37         | ENSMUSG00000039904 | 720  | 0.18 | 0.08 | 0.14 | 0.17 | 0.06 | 0.23 |
| chr6 | 40275362  | 40275762  | Agk           | ENSMUSG00000029916 | 85   | 0.14 | 0.39 | 0.07 | 0.16 | 0.05 | 0.19 |
| chr6 | 128387712 | 128388843 | Fkbp4         | ENSMUSG00000030357 | -119 | 0.18 | 0.24 | 0.11 | 0.13 | 0.24 | 0.13 |
| chr6 | 28429815  | 28430665  | Snd1          | ENSMUSG00000001424 | -108 | 0.18 | 0.11 | 0.1  | 0.23 | 0.05 | 0.16 |
| chr6 | 49213179  | 49214199  | Tra2a         | ENSMUSG00000029817 | 343  | 0.12 | 0.15 | 0.12 | 0.11 | 0.09 | 0.16 |
| chr6 | 92133647  | 92134103  | Mrps25        | ENSMUSG00000014551 | 90   | 0.11 | 0.09 | 0.12 | 0.14 | 0.04 | 0.12 |
| chr6 | 99642050  | 99643450  | Gpr27         | ENSMUSG00000072875 | 77   | 0.08 | 0.11 | 0.1  | 0.11 | 0.07 | 0.12 |
| chr6 | 136776200 | 136776719 | Wbp11         | ENSMUSG00000030216 | -202 | 0.19 | 0.23 | 0.09 | 0.12 | 0.12 | 0.12 |
| chr6 | 38484663  | 38485073  | 1110001J03Rik | ENSMUSG00000019689 | 45   | 0.16 | 0.11 | 0.06 | 0.13 | 0.25 | 0.09 |
| chr6 | 51473920  | 51474166  | Snx10         | ENSMUSG00000038301 | 62   | 0.25 | 0.29 | 0.19 | 0.29 | 0.09 | 0.14 |
| chr6 | 126594106 | 126595143 | Kcna1         | ENSMUSG00000047976 | 1195 | 0.1  | 0.08 | 0.07 | 0.13 | 0.07 | 0.15 |
| chr6 | 128374623 | 128374940 | Itfg2         | ENSMUSG00000001518 | 155  | 0.08 | 0.11 | 0.18 | 0.15 | 0.18 | 0.13 |
| chr6 | 23197534  | 23199805  | Fezf1         | ENSMUSG00000029697 | -405 | 0.2  | 0.2  | 0.15 | 0.2  | 0.13 | 0.16 |
| chr6 | 52118676  | 52119060  | 5730446D14Rik | ENSMUSG00000056445 | 359  | 0.25 | 0.12 | 0.08 | 0.14 | 0.04 | 0.11 |
| chr6 | 72305127  | 72305932  | Tmem150a      | ENSMUSG00000055912 | 88   | 0.4  | 0.37 | 0.13 | 0.18 | 0.25 | 0.16 |
| chr6 | 77929423  | 77929743  | Ctnna2        | ENSMUSG00000063063 | -39  | 0.21 | 0.14 | 0.09 | 0.1  | 0.06 | 0.13 |



|      |           |           |               |                    |      |      |      |      |      |      |      |
|------|-----------|-----------|---------------|--------------------|------|------|------|------|------|------|------|
| chr6 | 85865666  | 85866080  | Cml1          | ENSMUSG00000057103 | -202 | 0.5  | 0.08 | 0.14 | 0.17 | 0.26 | 0.18 |
| chr6 | 92893060  | 92893754  | Adams9        | ENSMUSG00000030022 | 79   | 0.07 | 0.13 | 0.13 | 0.23 | 0.04 | 0.11 |
| chr6 | 4697291   | 4698412   | Peg10         | ENSMUSG00000092035 | 545  | 0.54 | 0.36 | 0.39 | 0.53 | 0.48 | 0.4  |
| chr6 | 53237046  | 53238342  | 9430076C15Rik | ENSMUSG00000090982 | 405  | 0.27 | 0.16 | 0.12 | 0.2  | 0.22 | 0.16 |
| chr6 | 94450116  | 94450550  | Slc25a26      | ENSMUSG00000045100 | 25   | 0.67 | 0.45 | 0.1  | 0.23 | 0.39 | 0.17 |
| chr6 | 113342411 | 113342949 | Tll3          | ENSMUSG00000030276 | 228  | 0.1  | 0.13 | 0.1  | 0.11 | 0.07 | 0.11 |
| chr6 | 17980271  | 17980637  | Wnt2          | ENSMUSG00000010797 | -44  | 0.62 | 0.24 | 0.11 | 0.23 | 0.45 | 0.19 |
| chr6 | 52141052  | 52142225  | Hoxa4         | ENSMUSG00000000942 | 64   | 0.14 | 0.16 | 0.12 | 0.19 | 0.12 | 0.15 |
| chr6 | 47997435  | 47998983  | Zfp777        | ENSMUSG00000071477 | -416 | 0.1  | 0.15 | 0.11 | 0.09 | 0.11 | 0.14 |
| chr6 | 92041208  | 92042545  | Nr2c2         | ENSMUSG00000005893 | 492  | 0.19 | 0.32 | 0.11 | 0.15 | 0.17 | 0.11 |
| chr6 | 18464614  | 18465058  | Cttnbp2       | ENSMUSG00000000416 | -87  | 0.4  | 0.42 | 0.16 | 0.18 | 0.2  | 0.2  |
| chr6 | 142294081 | 142294485 | Pyroxd1       | ENSMUSG00000041671 | 109  | 0.3  | 0.45 | 0.14 | 0.14 | 0.21 | 0.24 |
| chr6 | 147212211 | 147212827 | Pthlh         | ENSMUSG00000048776 | 170  | 0.19 | 0.14 | 0.13 | 0.17 | 0.15 | 0.13 |
| chr6 | 52166853  | 52167757  | Hoxa7         | ENSMUSG00000038236 | 146  | 0.14 | 0.2  | 0.11 | 0.21 | 0.1  | 0.14 |
| chr6 | 52190322  | 52190828  | Hoxa10        | ENSMUSG00000000938 | 219  | 0.33 | 0.29 | 0.11 | 0.24 | 0.2  | 0.12 |
| chr6 | 54942607  | 54943155  | Ggct          | ENSMUSG00000002797 | -180 | 0.05 | 0.26 | 0.09 | 0.17 | 0.33 | 0.14 |
| chr6 | 116624019 | 116624259 | Rassf4        | ENSMUSG00000042129 | -285 | 0.07 | 0.11 | 0.15 | 0.2  | 0.15 | 0.22 |
| chr6 | 42273650  | 42273925  | Fam131b       | ENSMUSG00000029861 | 804  | 0.5  | 0.25 | 0.14 | 0.07 | 0.08 | 0.11 |
| chr6 | 83661096  | 83662229  | Vax2          | ENSMUSG00000034777 | 404  | 0.08 | NA   | 0.11 | 0.15 | 0.13 | 0.16 |
| chr6 | 125444156 | 125444856 | Gm16749       | ENSMUSG00000085309 | 64   | 0.08 | 0.31 | 0.1  | 0.22 | 0.12 | 0.13 |
| chr6 | 146450114 | 146451275 | Itpr2         | ENSMUSG00000030287 | -294 | 0.33 | 0.5  | 0.12 | 0.16 | 0.08 | 0.13 |
| chr6 | 52179854  | 52180271  | Mir196b       | ENSMUSG00000065443 | 102  | 0.05 | 0.12 | 0.13 | 0.22 | 0.14 | 0.2  |
| chr6 | 72566148  | 72567104  | Tgoln1        | ENSMUSG00000056429 | 368  | 0.1  | 0.1  | 0.11 | 0.25 | 0.16 | 0.18 |
| chr6 | 28084948  | 28085508  | Grm8          | ENSMUSG00000024211 | -50  | 0.34 | 0.44 | 0.09 | 0.19 | 0.27 | 0.19 |
| chr6 | 39542524  | 39542827  | Ndufb2        | ENSMUSG00000002416 | 102  | 0.14 | 0.29 | 0.1  | 0.12 | 0.09 | 0.12 |
| chr6 | 40385324  | 40386340  | E330009J07Rik | ENSMUSG00000037172 | 300  | 0.1  | 0.12 | 0.1  | 0.14 | 0.08 | 0.09 |
| chr6 | 52108322  | 52108941  | Gm15051       | ENSMUSG00000087658 | 200  | 0.13 | 0.17 | 0.07 | 0.24 | 0.09 | 0.15 |
| chr6 | 66986545  | 66987366  | E230016M11Rik | ENSMUSG00000087231 | 362  | 0.17 | 0.35 | 0.12 | 0.1  | 0.22 | 0.12 |
| chr6 | 99616383  | 99616907  | Eif4e3        | ENSMUSG00000093661 | 120  | 0.26 | 0.38 | 0.18 | 0.22 | 0.32 | 0.18 |
| chr6 | 146595784 | 146596087 | Gm6654        | ENSMUSG00000084291 | 175  | 0.96 | 1    | 0.8  | 0.88 | 0.9  | 0.94 |

|      |           |           |               |                    |      |      |      |      |      |      |      |
|------|-----------|-----------|---------------|--------------------|------|------|------|------|------|------|------|
| chr6 | 4550767   | 4551299   | Casd1         | ENSMUSG00000015189 | 193  | 0.08 | 0.14 | 0.12 | 0.12 | 0.14 | 0.11 |
| chr6 | 29128973  | 29129665  | Prrt4         | ENSMUSG00000079654 | 265  | 0.16 | 0.16 | 0.08 | 0.12 | 0.11 | 0.14 |
| chr6 | 90412270  | 90413247  | Klf15         | ENSMUSG00000030087 | 188  | 0.27 | 0.26 | 0.11 | 0.11 | 0.14 | 0.1  |
| chr6 | 141198022 | 141199008 | Pde3a         | ENSMUSG00000041741 | 2    | 0.18 | 0.13 | 0.1  | 0.15 | 0.13 | 0.13 |
| chr6 | 145814056 | 145815345 | Bhlhe41       | ENSMUSG00000030256 | -622 | 0.11 | 0.07 | 0.09 | 0.12 | 0.08 | 0.11 |
| chr6 | 39155444  | 39157370  | Jhdm1d        | ENSMUSG00000042599 | 381  | 0.09 | 0.11 | 0.09 | 0.15 | 0.08 | 0.12 |
| chr6 | 49023756  | 49024324  | 2410003K15Rik | ENSMUSG00000029815 | 246  | 0.3  | 0.09 | 0.13 | 0.12 | 0.16 | 0.1  |
| chr6 | 86321346  | 86321707  | Snrpg         | ENSMUSG00000057278 | -8   | 0.1  | 0.07 | 0.1  | 0.15 | 0.05 | 0.13 |
| chr6 | 120615396 | 120617378 | Cecr2         | ENSMUSG00000071226 | 0    | 0.12 | 0.13 | 0.12 | 0.13 | 0.1  | 0.12 |
| chr6 | 124958851 | 124959454 | Zfp384        | ENSMUSG00000038346 | -11  | 0.14 | 0.23 | 0.11 | 0.13 | 0.11 | 0.2  |
| chr6 | 142705139 | 142705680 | Cmas          | ENSMUSG00000030282 | 203  | 0.39 | 0.21 | 0.13 | 0.14 | 0.3  | 0.19 |
| chr6 | 8727792   | 8728320   | Ica1          | ENSMUSG00000062995 | 51   | 0.15 | 0.9  | 0.1  | 0.31 | 0.22 | 0.11 |
| chr6 | 46994620  | 46995049  | Cntnap2       | ENSMUSG00000039419 | -225 | 0.11 | 0.26 | 0.17 | 0.28 | 0.18 | 0.21 |
| chr6 | 51382615  | 51383449  | Nfe2l3        | ENSMUSG00000029832 | 363  | 0.4  | 0.25 | 0.16 | 0.24 | 0.75 | 0.26 |
| chr6 | 82982760  | 82983551  | Dok1          | ENSMUSG00000068335 | 307  | 0.43 | 0.35 | 0.11 | 0.23 | 0.33 | 0.23 |
| chr6 | 113187609 | 113188107 | Mtmr14        | ENSMUSG00000030269 | 21   | 0.15 | 0.21 | 0.08 | 0.16 | 0.11 | 0.12 |
| chr6 | 61130103  | 61131074  | A730020E08Rik | ENSMUSG00000085849 | -324 | 0.09 | 0.09 | 0.09 | 0.14 | 0.07 | 0.1  |
| chr6 | 83660511  | 83660767  | Vax2os1       | ENSMUSG00000085794 | 287  | 0.04 | 0.08 | 0.16 | 0.16 | 0.09 | 0.13 |
| chr6 | 83781487  | 83781789  | Paip2b        | ENSMUSG00000045896 | 69   | 0.17 | 0.08 | 0.07 | 0.15 | 0.1  | 0.09 |
| chr6 | 91827938  | 91828503  | C130022K22Rik | ENSMUSG00000034083 | 173  | 1    | 0.38 | 0.09 | 0.24 | 0.21 | 0.16 |
| chr6 | 110595754 | 110596294 | Gm20387       | ENSMUSG00000092448 | -114 | 0.16 | 0.25 | 0.11 | 0.21 | 0.12 | 0.22 |
| chr6 | 13627459  | 13628170  | B630005N14Rik | ENSMUSG00000042742 | 152  | 0.1  | 0.16 | 0.12 | 0.15 | 0.07 | 0.13 |
| chr6 | 38826443  | 38826761  | Hipk2         | ENSMUSG00000061436 | -413 | 0.11 | 0.08 | 0.08 | 0.14 | 0.15 | 0.13 |
| chr6 | 124860108 | 124860364 | Lag3          | ENSMUSG00000030124 | -167 | 0.14 | 0.07 | 0.5  | 0.75 | 0.2  | 0.39 |
| chr6 | 29935114  | 29935527  | 1700023L04Rik | ENSMUSG00000045709 | -9   | 0.2  | 0.41 | 0.11 | 0.15 | 0.14 | 0.22 |
| chr6 | 38825742  | 38825962  | Hipk2         | ENSMUSG00000061436 | -36  | 0.18 | 0.15 | 0.3  | 0.09 | 0.11 | 0.09 |
| chr6 | 52264574  | 52264797  | 5730457N03Rik | ENSMUSG00000086126 | 141  | 0.12 | 0.09 | 0.11 | 0.26 | 0.08 | 0.21 |
| chr6 | 83018664  | 83021449  | Tlx2          | ENSMUSG00000068327 | 163  | 0.15 | 0.13 | 0.12 | 0.16 | 0.13 | 0.16 |
| chr6 | 85137491  | 85138417  | Emx1          | ENSMUSG00000033726 | 522  | 0.25 | 0.14 | 0.15 | 0.25 | 0.17 | 0.17 |
| chr6 | 86145037  | 86145928  | Tgfa          | ENSMUSG00000029999 | 62   | 0.13 | 0.14 | 0.09 | 0.1  | 0.11 | 0.14 |

|      |           |           |           |                    |      |      |      |      |      |      |      |
|------|-----------|-----------|-----------|--------------------|------|------|------|------|------|------|------|
| chr6 | 146590886 | 146591425 | Med21     | ENSMUSG00000030291 | 86   | 0.29 | NA   | 0.08 | 0.15 | 0.12 | 0.16 |
| chr6 | 114347711 | 114348256 | Hrh1      | ENSMUSG00000053004 | 53   | 0.09 | 0.12 | 0.09 | 0.11 | 0.05 | 0.12 |
| chr6 | 119280549 | 119280859 | Lrtm2     | ENSMUSG00000055003 | -7   | 0.18 | 0.15 | 0.08 | 0.11 | 0.09 | 0.28 |
| chr6 | 128305303 | 128306084 | Tulp3     | ENSMUSG00000001521 | 140  | 0.23 | 0.37 | 0.11 | 0.14 | 1    | 0.16 |
| chr6 | 11857682  | 11857955  | Phf14     | ENSMUSG00000029629 | 9    | 0.07 | 0.08 | 0.07 | 0.11 | 0.05 | 0.09 |
| chr6 | 88791532  | 88793017  | Abtb1     | ENSMUSG00000030083 | -414 | 0.1  | 0.23 | 0.18 | 0.14 | 0.13 | 0.22 |
| chr6 | 91162717  | 91162966  | Fbln2     | ENSMUSG00000064080 | 25   | 0.14 | 0.11 | 0.11 | 0.17 | 0.09 | 0.13 |
| chr6 | 129483156 | 129483437 | Gabarapl1 | ENSMUSG00000030161 | 78   | 1    | 0.22 | 0.53 | 0.3  | 0.57 | 0.1  |
| chr6 | 6528294   | 6528726   | Shfm1     | ENSMUSG00000042541 | 142  | 0.32 | 0.12 | 0.12 | 0.2  | 0.26 | 0.25 |
| chr6 | 71657644  | 71658418  | Reep1     | ENSMUSG00000052852 | 476  | 0.1  | 0.16 | 0.09 | 0.18 | 0.07 | 0.14 |
| chr6 | 83085734  | 83086066  | Rtkn      | ENSMUSG00000034930 | 94   | 0.26 | 0.33 | 0.13 | 0.3  | 0.19 | 0.19 |
| chr6 | 145811263 | 145812421 | Bhlhe41   | ENSMUSG00000030256 | 1980 | 0.13 | 0.16 | 0.08 | 0.1  | 0.15 | 0.13 |
| chr6 | 92655936  | 92656350  | Prickle2  | ENSMUSG00000030020 | -4   | 0.12 | 0.08 | 0.07 | 0.1  | 0.09 | 0.15 |
| chr6 | 116143117 | 116143814 | Tmcc1     | ENSMUSG00000030126 | -73  | 0.19 | 0.13 | 0.09 | 0.14 | 0.15 | 0.13 |
| chr6 | 117856630 | 117858240 | Hnmpf     | ENSMUSG00000042079 | 635  | 0.13 | 0.17 | 0.11 | 0.14 | 0.11 | 0.12 |
| chr6 | 100620585 | 100621375 | Shq1      | ENSMUSG00000035378 | 147  | 0.09 | 0.14 | 0.12 | 0.14 | 0.15 | 0.21 |
| chr6 | 113369211 | 113369445 | Rpusd3    | ENSMUSG00000051169 | -24  | 0.23 | 0.11 | 0.15 | 0.23 | 0.14 | 0.13 |
| chr6 | 124695558 | 124696263 | Atn1      | ENSMUSG0000004263  | -267 | 0.15 | 0.13 | 0.09 | 0.12 | 0.12 | 0.12 |
| chr6 | 77192598  | 77193124  | Lrrtm1    | ENSMUSG00000060780 | 178  | 0.11 | 0.18 | 0.11 | 0.16 | 0.09 | 0.14 |
| chr6 | 98978414  | 98978818  | Foxp1     | ENSMUSG00000030067 | -309 | 0.23 | 1    | 0.11 | 0.19 | 0.31 | 0.1  |
| chr6 | 59376125  | 59376434  | Gprin3    | ENSMUSG00000045441 | 5    | 0.11 | 0.09 | 0.06 | 0.12 | 0.07 | 0.11 |
| chr6 | 86388322  | 86389016  | C87436    | ENSMUSG00000046679 | 301  | 0.13 | 0.45 | 0.18 | 0.22 | 0.18 | 0.14 |
| chr6 | 119338206 | 119339097 | Adipor2   | ENSMUSG00000030168 | 53   | 0.06 | 0.14 | 0.1  | 0.15 | 0.1  | 0.13 |
| chr6 | 124867464 | 124868011 | Ptms      | ENSMUSG00000030122 | 227  | 0.12 | 0.13 | 0.12 | 0.11 | 0.14 | 0.12 |
| chr6 | 85019041  | 85019565  | Exoc6b    | ENSMUSG00000033769 | 148  | 0.08 | 0.06 | 0.13 | 0.15 | 0.06 | 0.12 |
| chr6 | 119429035 | 119431195 | Fbxl14    | ENSMUSG00000030019 | 429  | 0.16 | 0.31 | 0.11 | 0.17 | 0.18 | 0.13 |
| chr6 | 35083373  | 35084122  | Cnot4     | ENSMUSG00000038784 | -10  | 0.33 | 0.15 | 0.1  | 0.24 | 0.7  | 0.16 |
| chr6 | 38501042  | 38502133  | Luc7l2    | ENSMUSG00000029823 | 253  | 0.19 | NA   | 0.06 | 0.16 | 0.11 | 0.17 |
| chr6 | 108778284 | 108779261 | Edem1     | ENSMUSG00000030104 | 137  | 0.1  | 0.15 | 0.13 | 0.13 | 0.13 | 0.11 |
| chr6 | 120480894 | 120481571 | Cecr5     | ENSMUSG00000058979 | 76   | 0.14 | 0.09 | 0.1  | 0.1  | 0.1  | 0.14 |

|      |           |           |               |                     |      |      |      |      |      |      |      |
|------|-----------|-----------|---------------|---------------------|------|------|------|------|------|------|------|
| chr6 | 124364641 | 124365211 | Pex5          | ENSMUSG00000005069  | -45  | 0.06 | 0.07 | 0.1  | 0.16 | 0.07 | 0.16 |
| chr6 | 57641667  | 57642061  | Pigy          | ENSMUSG000000043162 | 208  | 0.33 | 0.06 | 0.1  | 0.18 | 0.09 | 0.16 |
| chr6 | 72047327  | 72048044  | St3gal5       | ENSMUSG000000056091 | 78   | 0.31 | 0.32 | 0.16 | 0.19 | 0.27 | 0.28 |
| chr6 | 21899379  | 21900307  | Ing3          | ENSMUSG000000029670 | 272  | 0.14 | 0.13 | 0.08 | 0.13 | 0.07 | 0.09 |
| chr6 | 34267156  | 34267652  | Akr1b3        | ENSMUSG00000001642  | 26   | 0.22 | 0.2  | 0.15 | 0.15 | 0.12 | 0.26 |
| chr6 | 124915236 | 124915813 | Cops7a        | ENSMUSG000000030127 | -216 | 0.17 | 0.12 | 0.1  | 0.22 | 0.13 | 0.14 |
| chr6 | 8208938   | 8209647   | Rpa3          | ENSMUSG000000012483 | -152 | 0.22 | 0.27 | 0.14 | 0.16 | 0.19 | 0.15 |
| chr6 | 28165244  | 28165799  | 6530409C15Rik | ENSMUSG000000043340 | -34  | 0.17 | 0.39 | 0.15 | 0.17 | 0.23 | 0.09 |
| chr6 | 52125600  | 52126166  | 2700086A05Rik | ENSMUSG000000085696 | 649  | 0.08 | 0.15 | 0.09 | 0.14 | 0.06 | 0.14 |
| chr6 | 127059197 | 127059787 | 9630033F20Rik | ENSMUSG000000038028 | 76   | 0.11 | 0.15 | 0.12 | 0.12 | 0.09 | 0.16 |
| chr6 | 54379504  | 54380089  | 9130019P16Rik | ENSMUSG000000073067 | -265 | 0.08 | 0.27 | 0.09 | 0.09 | 0.07 | 0.12 |
| chr6 | 95067636  | 95068484  | Kbtbd8        | ENSMUSG000000030031 | 326  | 0.17 | 0.2  | 0.1  | 0.09 | 0.14 | 0.11 |
| chr6 | 29222506  | 29222924  | Hilpda        | ENSMUSG000000043421 | 89   | 0.11 | 0.2  | 0.14 | 0.12 | 0.06 | 0.25 |
| chr6 | 47763180  | 47763656  | Pdia4         | ENSMUSG000000025823 | 93   | 0.15 | 0.12 | 0.12 | 0.18 | 0.18 | 0.17 |
| chr6 | 56781903  | 56782495  | Fkbp9         | ENSMUSG000000029781 | 146  | 0.13 | 0.16 | 0.11 | 0.13 | 0.11 | 0.13 |
| chr6 | 88848580  | 88848829  | Mcm2          | ENSMUSG000000002870 | 70   | 0.12 | 0.07 | 0.1  | 0.15 | 0.09 | 0.16 |
| chr6 | 136756711 | 136757479 | H2afj         | ENSMUSG000000060032 | 326  | 0.2  | 0.5  | 0.17 | 0.18 | 0.1  | 0.19 |
| chr6 | 108135230 | 108135560 | Sumf1         | ENSMUSG000000030101 | 155  | 0.12 | NA   | 0.19 | 0.28 | 0.16 | 0.13 |
| chr6 | 115310985 | 115312244 | Pparg         | ENSMUSG000000000440 | 375  | 0.11 | 0.18 | 0.13 | 0.19 | 0.14 | 0.2  |
| chr6 | 67216760  | 67217739  | Serbp1        | ENSMUSG000000036371 | 276  | 0.24 | 0.23 | 0.15 | 0.24 | 0.27 | 0.14 |
| chr6 | 134742303 | 134743015 | Dusp16        | ENSMUSG000000030203 | -166 | 0.12 | 0.26 | 0.2  | 0.14 | 0.09 | 0.15 |
| chr6 | 140571905 | 140572272 | Aebp2         | ENSMUSG000000030232 | 68   | 0.56 | 0.5  | 0.09 | 0.29 | 0.4  | 0.3  |
| chr6 | 83391460  | 83391723  | Tet3          | ENSMUSG000000034832 | 78   | 0.08 | 0.19 | 0.07 | 0.12 | 0.11 | 0.07 |
| chr6 | 108609359 | 108610439 | Bhlhe40       | ENSMUSG000000030103 | -724 | 0.13 | 0.09 | 0.11 | 0.15 | 0.1  | 0.14 |
| chr6 | 117961319 | 117961816 | Rasgef1a      | ENSMUSG000000030134 | 175  | 0.17 | 0.25 | 0.14 | 0.12 | 0.2  | 0.21 |
| chr6 | 119797729 | 119798630 | Erc1          | ENSMUSG000000030172 | -11  | 0.1  | 0.32 | 0.12 | 0.2  | 0.11 | 0.17 |
| chr6 | 28371427  | 28371798  | Gcc1          | ENSMUSG000000029708 | 112  | 0.22 | 0.02 | 0.23 | 0.12 | 0.16 | 0.2  |
| chr6 | 39067718  | 39068856  | Parp12        | ENSMUSG000000038507 | 61   | 0.19 | 0.15 | 0.12 | 0.16 | 0.18 | 0.11 |
| chr6 | 128150341 | 128150818 | Gm10010       | ENSMUSG000000056771 | 62   | 0.06 | 0.18 | 0.11 | 0.23 | 0.07 | 0.14 |
| chr6 | 23788726  | 23789661  | Cadps2        | ENSMUSG000000017978 | -56  | 0.12 | 0.19 | 0.09 | 0.12 | 0.1  | 0.15 |

|      |           |           |               |                    |      |      |      |      |      |      |      |
|------|-----------|-----------|---------------|--------------------|------|------|------|------|------|------|------|
| chr6 | 145197892 | 145199146 | Kras          | ENSMUSG00000030265 | 171  | 0.13 | 0.13 | 0.09 | 0.12 | 0.12 | 0.14 |
| chr6 | 22305660  | 22306335  | Fam3c         | ENSMUSG00000029672 | 76   | 0.18 | 0.35 | 0.13 | 0.13 | 0.15 | 0.09 |
| chr6 | 125235891 | 125236132 | Tuba3a        | ENSMUSG00000067702 | 49   | 0.98 | 0.95 | 0.89 | 0.95 | 1    | 0.96 |
| chr6 | 24614466  | 24615433  | Wasl          | ENSMUSG00000029684 | -11  | 0.11 | 0.18 | 0.1  | 0.11 | 0.12 | 0.15 |
| chr6 | 48345583  | 48346015  | Krba1         | ENSMUSG00000042810 | 214  | 0.18 | 0.18 | 0.12 | 0.14 | 0.15 | 0.13 |
| chr6 | 72738133  | 72739655  | Tcf7l1        | ENSMUSG00000055799 | -585 | 0.22 | 0.14 | 0.1  | 0.12 | 0.21 | 0.13 |
| chr6 | 116287790 | 116288547 | 8-Mar         | ENSMUSG00000025702 | 126  | 0.09 | 0.15 | 0.09 | 0.15 | 0.11 | 0.14 |
| chr6 | 148844409 | 148844979 | Caprin2       | ENSMUSG00000030309 | -22  | 0.14 | 0.07 | 0.17 | 0.18 | 0.1  | 0.09 |
| chr6 | 29161959  | 29162553  | Impdh1        | ENSMUSG00000003500 | -7   | 0.1  | 0.17 | 0.07 | 0.12 | 0.08 | 0.19 |
| chr6 | 86315390  | 86316070  | Fam136a       | ENSMUSG00000057497 | 53   | 0.11 | 0.13 | 0.08 | 0.12 | 0.12 | 0.12 |
| chr6 | 97566861  | 97567755  | Frm4b         | ENSMUSG00000030064 | 215  | 0.13 | 0.12 | 0.11 | 0.15 | 0.11 | 0.12 |
| chr6 | 119852491 | 119853066 | 4930540M05Rik | ENSMUSG00000086280 | -107 | 0.08 | 0.14 | 0.08 | 0.11 | 0.07 | 0.11 |
| chr6 | 134590896 | 134591327 | Loh12cr1      | ENSMUSG00000042992 | 153  | 0.12 | 0.14 | 0.13 | 0.14 | 0.11 | 0.13 |
| chr6 | 149257867 | 149258359 | 2810474O19Rik | ENSMUSG00000032712 | 177  | 0.19 | 0.27 | 0.11 | 0.23 | 0.16 | 0.1  |
| chr6 | 66846215  | 66846966  | Gng12         | ENSMUSG00000036402 | 199  | 0.16 | 0.26 | 0.09 | 0.12 | 0.14 | 0.11 |
| chr6 | 15670722  | 15671404  | Mdfc          | ENSMUSG00000041390 | -24  | 0.19 | 0.18 | 0.1  | 0.21 | 0.24 | 0.15 |
| chr6 | 18464212  | 18464425  | Cttnbp2       | ENSMUSG00000000416 | 431  | 0.17 | 0.15 | 0.14 | 0.07 | 0.13 | 0.15 |
| chr6 | 97155392  | 97155605  | Uba3          | ENSMUSG00000030061 | 56   | 0.06 | 0.07 | 0.09 | 0.08 | 0.05 | 0.11 |
| chr6 | 148893030 | 148895271 | Fam60a        | ENSMUSG00000039985 | -816 | 0.11 | 0.25 | 0.1  | 0.12 | 0.11 | 0.14 |
| chr6 | 5248135   | 5248518   | Pon2          | ENSMUSG00000032667 | 4    | 0.11 | 0.33 | 0.12 | 0.16 | 0.2  | 0.16 |
| chr6 | 30409849  | 30410176  | 1700012C14Rik | ENSMUSG00000085470 | -116 | 0.17 | 0.26 | 0.14 | 0.17 | 0.1  | 0.16 |
| chr6 | 114987565 | 114987977 | 1500001M20Rik | ENSMUSG00000030316 | 72   | 0.28 | 0.16 | 0.13 | 0.15 | 0.26 | 0.16 |
| chr6 | 136610025 | 136610321 | Plbd1         | ENSMUSG00000030214 | 221  | 0.1  | 0.12 | 0.09 | 0.1  | 0.07 | 0.14 |
| chr6 | 146582782 | 146583217 | Tm7sf3        | ENSMUSG00000040234 | 21   | 0.32 | 0.21 | 0.16 | 0.11 | 0.34 | 0.11 |
| chr6 | 30643408  | 30643968  | Tsga14        | ENSMUSG00000029790 | -12  | 0.72 | 0.61 | 0.19 | 0.21 | 0.65 | 0.21 |
| chr6 | 97437523  | 97438025  | Frm4b         | ENSMUSG00000030064 | 23   | 0.5  | NA   | 0.13 | 0.2  | 0.62 | 0.31 |
| chr6 | 71781180  | 71781862  | Immt          | ENSMUSG00000052337 | 196  | 0.19 | 0.18 | 0.13 | 0.1  | 0.15 | 0.19 |
| chr6 | 84537604  | 84538086  | Cyp26b1       | ENSMUSG00000063415 | 787  | 0.16 | 0.25 | 0.11 | 0.12 | 0.17 | 0.14 |
| chr6 | 92164558  | 92164978  | Zfyve20       | ENSMUSG00000014550 | -205 | 0.19 | 0.22 | 0.14 | 0.18 | 0.23 | 0.12 |
| chr6 | 146836577 | 146837254 | Ppfibp1       | ENSMUSG00000016487 | -94  | 0.18 | 0.37 | 0.1  | 0.13 | 0.17 | 0.11 |

|      |           |           |               |                    |       |      |      |      |      |      |      |
|------|-----------|-----------|---------------|--------------------|-------|------|------|------|------|------|------|
| chr6 | 29997621  | 29998887  | Nrf1          | ENSMUSG00000058440 | 266   | 0.16 | 0.23 | 0.11 | 0.16 | 0.17 | 0.16 |
| chr6 | 47780172  | 47780631  | Zfp786        | ENSMUSG00000051499 | 166   | 0.14 | 0.56 | 0.06 | 0.09 | 0.12 | 0.07 |
| chr6 | 114918665 | 114920031 | Vgll4         | ENSMUSG00000030315 | -150  | 0.12 | 0.09 | 0.13 | 0.17 | 0.1  | 0.12 |
| chr6 | 127717731 | 127719419 | Prmt8         | ENSMUSG00000030350 | 915   | 0.31 | 0.24 | 0.12 | 0.18 | 0.28 | 0.18 |
| chr6 | 50059966  | 50060569  | Mpp6          | ENSMUSG00000038388 | 27    | 0.13 | 0.12 | 0.1  | 0.11 | 0.12 | 0.11 |
| chr6 | 100654741 | 100655175 | Gxylt2        | ENSMUSG00000030074 | 209   | 0.05 | 0.16 | 0.08 | 0.12 | 0.06 | 0.07 |
| chr6 | 113392524 | 113392977 | Jagn1         | ENSMUSG00000051256 | 187   | 0.29 | 0.44 | 0.11 | 0.2  | 0.27 | 0.16 |
| chr6 | 121423061 | 121423840 | lqsec3        | ENSMUSG00000040797 | 191   | 0.08 | 0.12 | 0.09 | 0.26 | 0.07 | 0.18 |
| chr6 | 112439018 | 112439877 | Oxtr          | ENSMUSG00000049112 | 355   | 0.17 | 0.19 | 0.1  | 0.2  | 0.12 | 0.16 |
| chr6 | 113232262 | 113232549 | Cpne9         | ENSMUSG00000030270 | 104   | 0.18 | 0.27 | 0.08 | 0.16 | 0.15 | 0.12 |
| chr6 | 71221476  | 71222167  | Krcc1         | ENSMUSG00000053012 | 108   | 0.27 | 0.09 | 0.17 | 0.2  | 0.25 | 0.17 |
| chr6 | 77193653  | 77194819  | Lrrtm1        | ENSMUSG00000060780 | 1320  | 0.24 | 0.27 | 0.1  | 0.14 | 0.24 | 0.15 |
| chr6 | 83004367  | 83005305  | Htra2         | ENSMUSG00000068329 | -400  | 0.1  | 0.15 | 0.11 | 0.09 | 0.09 | 0.15 |
| chr6 | 50546370  | 50546700  | 4921507P07Rik | ENSMUSG00000029828 | 96    | 0.08 | 0.08 | 0.12 | 0.15 | 0.06 | 0.17 |
| chr6 | 52266541  | 52266854  | 5730457N03Rik | ENSMUSG00000086126 | -1871 | 0.05 | 0.08 | 0.16 | 0.17 | 0.08 | 0.1  |
| chr6 | 147039890 | 147040700 | Klhdc5        | ENSMUSG00000040102 | 394   | 0.11 | 0.18 | 0.11 | 0.12 | 0.11 | 0.14 |
| chr6 | 43215285  | 43215517  | Arhgef5       | ENSMUSG00000033542 | -242  | 0.17 | 0.17 | 0.19 | 0.13 | 0.13 | 0.19 |
| chr6 | 85105018  | 85105354  | Spr-ps1       | ENSMUSG00000068303 | 187   | 0.1  | 0.09 | 0.08 | 0.13 | 0.09 | 0.15 |
| chr6 | 87994799  | 87995325  | Rab7          | ENSMUSG00000079477 | -51   | 0.12 | 0.18 | 0.11 | 0.17 | 0.12 | 0.14 |
| chr6 | 124946829 | 124947065 | C530028O21Rik | ENSMUSG00000030329 | -146  | 0.15 | 0.08 | 0.09 | 0.09 | 0.17 | 0.12 |
| chr6 | 6812725   | 6812995   | Dlx6          | ENSMUSG00000029754 | -474  | 0.88 | 0.62 | 0.24 | 0.24 | 1    | 0.23 |
| chr6 | 6813683   | 6814073   | Dlx6          | ENSMUSG00000029754 | 81    | 0.1  | 0.16 | 0.09 | 0.13 | 0.08 | 0.18 |
| chr6 | 6831412   | 6831925   | Dlx5          | ENSMUSG00000029755 | 400   | 0.09 | 0.13 | 0.18 | 0.19 | 0.09 | 0.18 |
| chr6 | 6905842   | 6906234   | Gm17465       | ENSMUSG00000090567 | -138  | 1    | 0.55 | 0.12 | 0.28 | 0.5  | 0.2  |
| chr6 | 8159077   | 8159710   | Mios          | ENSMUSG00000042447 | 171   | 0.2  | 0.17 | 0.09 | 0.16 | 0.19 | 0.17 |
| chr6 | 24477063  | 24477824  | Ndufa5        | ENSMUSG00000023089 | 83    | 0.17 | 0.07 | 0.09 | 0.09 | 0.09 | 0.13 |
| chr6 | 28347695  | 28348016  | Zfp800        | ENSMUSG00000039841 | 150   | 0.25 | NA   | 0.18 | 0.25 | 0.17 | 0.12 |
| chr6 | 29165984  | 29166355  | Impdh1        | ENSMUSG00000003500 | 108   | 0.1  | 0.09 | 0.1  | 0.14 | 0.09 | 0.15 |
| chr6 | 29352791  | 29353103  | Ccdc136       | ENSMUSG00000029769 | 42    | 0.8  | 0.73 | 0.45 | 0.64 | 1    | 0.35 |
| chr6 | 29383165  | 29383739  | Finc          | ENSMUSG00000068699 | 196   | 0.09 | 0.14 | 0.16 | 0.2  | 0.09 | 0.14 |

|      |          |          |               |                     |      |      |      |      |      |      |      |
|------|----------|----------|---------------|---------------------|------|------|------|------|------|------|------|
| chr6 | 29476398 | 29477188 | Irf5          | ENSMUSG00000029771  | 168  | 0.08 | 0.1  | 0.09 | 0.12 | 0.07 | 0.11 |
| chr6 | 29644117 | 29644502 | Tspan33       | ENSMUSG00000001763  | 87   | 0.15 | 0.35 | 0.16 | 0.21 | 0.16 | 0.14 |
| chr6 | 29718095 | 29718366 | Ahcyl2        | ENSMUSG000000029772 | -213 | 0.14 | NA   | 0.1  | 0.12 | 0.12 | 0.15 |
| chr6 | 29866912 | 29867528 | Fam40b        | ENSMUSG000000039629 | 207  | 0.09 | 0.1  | 0.08 | 0.11 | 0.08 | 0.1  |
| chr6 | 31348706 | 31349395 | Mkln1         | ENSMUSG000000025609 | 315  | 0.22 | 0.11 | 0.1  | 0.13 | 0.22 | 0.23 |
| chr6 | 34871371 | 34871757 | Stra8         | ENSMUSG000000029848 | 550  | 0.88 | 0.63 | 0.87 | 0.96 | 0.84 | 0.96 |
| chr6 | 35202564 | 35202894 | 1810058I24Rik | ENSMUSG000000073155 | 75   | 0.26 | 0.56 | 0.12 | 0.23 | 0.27 | 0.19 |
| chr6 | 37391666 | 37392372 | Creb3l2       | ENSMUSG000000038648 | 127  | 0.12 | 0.43 | 0.12 | 0.1  | 0.07 | 0.23 |
| chr6 | 39327418 | 39327776 | Slc37a3       | ENSMUSG000000029924 | 74   | 0.33 | 0.07 | 0.09 | 0.25 | 0.3  | 0.11 |
| chr6 | 48576967 | 48577337 | Al854703      | ENSMUSG000000053297 | 389  | 0.37 | 0.24 | 0.1  | 0.19 | 0.38 | 0.1  |
| chr6 | 49317861 | 49318093 | D330028D13Rik | ENSMUSG000000047115 | 82   | 0.2  | 0.2  | 0.07 | 0.16 | 0.29 | 0.08 |
| chr6 | 52179017 | 52179287 | Mir196b       | ENSMUSG000000065443 | 1012 | 0.12 | 0.35 | 0.15 | 0.1  | 0.12 | 0.12 |
| chr6 | 52180496 | 52180832 | 9930038K12Rik | ENSMUSG000000056583 | -135 | 0.04 | 0.12 | 0.11 | 0.11 | 0.05 | 0.14 |
| chr6 | 52183393 | 52183614 | Hoxa10        | ENSMUSG00000000938  | -180 | 0.29 | NA   | 0.21 | 0.37 | 0.2  | 0.14 |
| chr6 | 53989427 | 53990332 | Chn2          | ENSMUSG000000004633 | 331  | 0.12 | 0.14 | 0.1  | 0.16 | 0.12 | 0.12 |
| chr6 | 54515786 | 54516437 | Scrn1         | ENSMUSG000000019124 | 372  | 0.24 | 0.1  | 0.11 | 0.14 | 0.23 | 0.11 |
| chr6 | 55401835 | 55402590 | Adcyap1r1     | ENSMUSG000000029778 | 240  | 0.17 | 0.21 | 0.13 | 0.16 | 0.08 | 0.12 |
| chr6 | 67325978 | 67326215 | Ii12rb2       | ENSMUSG000000018341 | 86   | 0.5  | 0.33 | 0.19 | 0.26 | 0.5  | 0.16 |
| chr6 | 70794453 | 70795090 | Eif2ak3       | ENSMUSG000000031668 | 262  | 0.48 | 0.16 | 0.22 | 1    | 0.48 | 0.2  |
| chr6 | 72312086 | 72312442 | Rnf181        | ENSMUSG000000055850 | 74   | 0.23 | 0.28 | 0.08 | 0.15 | 0.21 | 0.19 |
| chr6 | 72330215 | 72330598 | Vamp5         | ENSMUSG000000073002 | 56   | 0.11 | 0.08 | 0.08 | 0.17 | 0.1  | 0.13 |
| chr6 | 72908071 | 72908832 | Tmsb10        | ENSMUSG000000079523 | -155 | 0.17 | 0.25 | 0.09 | 0.15 | 0.14 | 0.11 |
| chr6 | 73198706 | 73198994 | Suclg1        | ENSMUSG000000052738 | 188  | 0.08 | 0.17 | 0.09 | 0.27 | 0.09 | 0.12 |
| chr6 | 78165858 | 78166071 | Gm5576        | ENSMUSG000000063692 | 115  | 1    | 1    | 0.6  | 0.58 | 1    | 0.92 |
| chr6 | 81991720 | 81991929 | Fam176a       | ENSMUSG000000035104 | 142  | 0.13 | 0.27 | 0.1  | NA   | 0.17 | 0.07 |
| chr6 | 82889454 | 82889730 | Sema4f        | ENSMUSG000000000627 | 171  | 0.06 | 0.22 | 0.08 | 0.16 | 0.08 | 0.1  |
| chr6 | 83037526 | 83037940 | Lbx2          | ENSMUSG000000034968 | 401  | 1    | 1    | 0.21 | 1    | 1    | 0.33 |
| chr6 | 83051546 | 83052485 | Ccdc142       | ENSMUSG000000079511 | 404  | 0.15 | 0.12 | 0.1  | 0.15 | 0.14 | 0.17 |
| chr6 | 83092278 | 83092529 | Rtkn          | ENSMUSG000000034930 | 17   | 0.5  | NA   | 0.24 | NA   | 0.2  | NA   |
| chr6 | 83275880 | 83276387 | Mob1a         | ENSMUSG000000043131 | 123  | 0.17 | 0.19 | 0.11 | 0.09 | 0.17 | 0.22 |

|      |           |           |         |                     |      |      |      |      |      |      |      |
|------|-----------|-----------|---------|---------------------|------|------|------|------|------|------|------|
| chr6 | 83522291  | 83522492  | Stambp  | ENSMUSG00000006906  | 107  | 0.1  | 0.13 | 0.1  | 0.14 | 0.14 | 0.13 |
| chr6 | 83652191  | 83652902  | Vax2os1 | ENSMUSG000000085794 | 991  | 0.1  | 0.09 | 0.14 | 0.14 | 0.1  | 0.17 |
| chr6 | 83958728  | 83959008  | Dysf    | ENSMUSG000000033788 | -41  | 0.08 | 0.19 | 0.13 | 0.22 | 0.08 | 0.21 |
| chr6 | 85381896  | 85382284  | Smyd5   | ENSMUSG000000033706 | 107  | 0.12 | 0.17 | 0.09 | 0.14 | 0.1  | 0.15 |
| chr6 | 86354160  | 86354737  | Tia1    | ENSMUSG000000071337 | 235  | 0.11 | 0.13 | 0.06 | 0.12 | 0.1  | 0.1  |
| chr6 | 87540528  | 87540796  | Prokr1  | ENSMUSG000000049409 | 33   | 0.1  | 0.28 | 0.12 | 0.19 | 0.06 | 0.1  |
| chr6 | 88577310  | 88577753  | Kbtbd12 | ENSMUSG000000033182 | -95  | 0.18 | 0.33 | 0.09 | 0.17 | 0.22 | 0.14 |
| chr6 | 90275041  | 90275305  | Chst13  | ENSMUSG000000056643 | 6    | 0.15 | 0.16 | 0.1  | 0.18 | 0.15 | 0.11 |
| chr6 | 90686177  | 90687213  | lqsec1  | ENSMUSG000000034312 | -14  | 0.16 | 0.18 | 0.1  | 0.16 | 0.17 | 0.13 |
| chr6 | 90760016  | 90760269  | lqsec1  | ENSMUSG000000034312 | -25  | 0.18 | 0.32 | 0.13 | 0.17 | 0.18 | 0.1  |
| chr6 | 91465586  | 91466346  | Xpc     | ENSMUSG000000030094 | -88  | 0.09 | 0.16 | 0.08 | 0.11 | 0.1  | 0.14 |
| chr6 | 91634125  | 91634393  | Slc6a6  | ENSMUSG000000030096 | 198  | 0.34 | 0.17 | 0.11 | 0.18 | 0.37 | 0.25 |
| chr6 | 108732972 | 108733823 | Arl8b   | ENSMUSG000000030105 | 344  | 0.06 | 0.28 | 0.1  | 0.19 | 0.1  | 0.18 |
| chr6 | 113143922 | 113144359 | Lhfpl4  | ENSMUSG000000042873 | 1238 | 1    | 0.47 | 0.2  | 0.44 | 1    | 0.14 |
| chr6 | 113432490 | 113433389 | Creld1  | ENSMUSG000000030284 | -352 | 0.11 | 0.15 | 0.1  | 0.14 | 0.1  | 0.11 |
| chr6 | 113451725 | 113452039 | Prrt3   | ENSMUSG000000045009 | -70  | 0.08 | 0.09 | 0.1  | 0.27 | 0.13 | 0.17 |
| chr6 | 115758210 | 115758798 | Rpl32   | ENSMUSG000000057841 | 261  | 0.17 | 0.1  | 0.11 | 0.11 | 0.18 | 0.08 |
| chr6 | 116501168 | 116501381 | Gm5580  | ENSMUSG000000060393 | 92   | 1    | NA   | 0.85 | 0.85 | 1    | 0.97 |
| chr6 | 118511984 | 118512467 | Ankrd26 | ENSMUSG00000007827  | 49   | 0.09 | 0.06 | 0.19 | 0.22 | 0.1  | 0.17 |
| chr6 | 120786145 | 120786613 | Bcl2l13 | ENSMUSG000000009112 | 131  | 0.25 | 0.5  | 0.15 | 0.09 | 0.2  | 0.21 |
| chr6 | 121195725 | 121195935 | Usp18   | ENSMUSG000000030107 | -94  | 0.25 | 0.33 | 0.17 | 0.06 | 0.18 | 0.12 |
| chr6 | 122258743 | 122259273 | M6pr    | ENSMUSG000000007458 | -9   | 0.33 | 0.53 | 0.12 | 0.24 | 0.33 | 0.19 |
| chr6 | 122751554 | 122752066 | Slc2a3  | ENSMUSG000000003153 | -152 | 0.5  | 0.48 | 0.09 | 0.11 | 0.24 | 0.24 |
| chr6 | 124719364 | 124719697 | Eno2    | ENSMUSG000000004267 | -28  | 0.09 | 0.34 | 0.12 | 0.15 | 0.11 | 0.18 |
| chr6 | 125045959 | 125046836 | Chd4    | ENSMUSG000000063870 | 398  | 0.11 | 0.15 | 0.11 | 0.15 | 0.1  | 0.13 |
| chr6 | 126114601 | 126115080 | Ntf3    | ENSMUSG000000049107 | 1922 | 1    | 0.28 | 0.08 | 0.24 | 0.48 | 0.2  |
| chr6 | 127837712 | 127837931 | Tspan11 | ENSMUSG000000030351 | 31   | 0.08 | 0.05 | 0.11 | 0.09 | 0.08 | 0.11 |
| chr6 | 128792903 | 128793286 | Gm17395 | ENSMUSG000000090617 | -710 | 0.13 | 0.11 | 0.13 | 0.21 | 0.14 | 0.13 |
| chr6 | 131243042 | 131243310 | Magohb  | ENSMUSG000000030188 | -27  | 0.11 | 0.09 | 0.18 | 0.16 | 0.06 | 0.19 |
| chr6 | 134847651 | 134848639 | Gpr19   | ENSMUSG000000032641 | -312 | 0.15 | 0.19 | 0.1  | 0.24 | 0.15 | 0.23 |



|      |           |           |               |                    |      |      |      |      |      |      |      |
|------|-----------|-----------|---------------|--------------------|------|------|------|------|------|------|------|
| chr6 | 135117890 | 135118269 | Hebp1         | ENSMUSG00000042770 | 154  | 0.1  | 0.12 | 0.17 | 0.12 | 0.08 | 0.17 |
| chr6 | 137117813 | 137118324 | Rerg          | ENSMUSG00000030222 | 138  | 0.09 | 0.1  | 0.09 | 0.1  | 0.09 | 0.11 |
| chr6 | 142519653 | 142520142 | Kcnj8         | ENSMUSG00000030247 | -21  | 0.1  | 0.21 | 0.07 | 0.14 | 0.09 | 0.11 |
| chr6 | 142912551 | 142913069 | St8sia1       | ENSMUSG00000030283 | 162  | 0.2  | 0.3  | 0.11 | 0.18 | 0.17 | 0.16 |
| chr6 | 144729999 | 144730426 | Sox5          | ENSMUSG00000041540 | 227  | 0.15 | 0.14 | 0.11 | 0.16 | 0.16 | 0.17 |
| chr6 | 147424353 | 147425040 | Ccdc91        | ENSMUSG00000030301 | 303  | 0.14 | 0.11 | 0.09 | 0.13 | 0.15 | 0.11 |
| chr6 | 3713576   | 3713862   | Calcr         | ENSMUSG00000023964 | -90  | 0.17 | NA   | 0.09 | 0.23 | NA   | 0.1  |
| chr6 | 5675672   | 5675924   | Dync11        | ENSMUSG00000029757 | 35   | NA   | NA   | 0.2  | 1    | NA   | NA   |
| chr6 | 7504903   | 7505232   | Tac1          | ENSMUSG00000061762 | -4   | NA   | 1    | NA   | NA   | NA   | NA   |
| chr6 | 18798477  | 18798790  | Naa38         | ENSMUSG00000044155 | 54   | NA   | 0.12 | 0.1  | 0.14 | 0.06 | 0.17 |
| chr6 | 28083666  | 28083918  | Grm8          | ENSMUSG00000024211 | -467 | NA   | NA   | 0.26 | 0.75 | NA   | 0.36 |
| chr6 | 29346379  | 29346656  | AC044807.1    | ENSMUSG00000092956 | -100 | NA   | 1    | 0.09 | 0.16 | 0.06 | 0.12 |
| chr6 | 29446440  | 29446642  | Kcp           | ENSMUSG00000059022 | -627 | NA   | 0.33 | 0.19 | NA   | 0.67 | 0.31 |
| chr6 | 29457708  | 29458070  | Gm17515       | ENSMUSG00000072491 | 164  | NA   | 0.25 | 0.08 | 0.26 | 0.22 | 0.16 |
| chr6 | 29559123  | 29559957  | Tnpo3         | ENSMUSG00000012535 | 67   | NA   | 0.25 | 0.11 | 0.34 | 0.1  | 0.28 |
| chr6 | 30687907  | 30688499  | Mest          | ENSMUSG00000051855 | 153  | NA   | 1    | 1    | NA   | NA   | 0.89 |
| chr6 | 31167780  | 31167986  | AB041803      | ENSMUSG00000044471 | 550  | NA   | NA   | 0.21 | 0.33 | 0.2  | 0.13 |
| chr6 | 31168145  | 31168355  | AB041803      | ENSMUSG00000044471 | 183  | NA   | NA   | 0.06 | 0.11 | 0.1  | 0.11 |
| chr6 | 34126681  | 34127168  | Slc35b4       | ENSMUSG00000018999 | 46   | 0.25 | 0.17 | 0.12 | 0.36 | NA   | 0.3  |
| chr6 | 36338526  | 36338735  | 9330158H04Rik | ENSMUSG00000073154 | 287  | 0.08 | 0.06 | 0.11 | 0.12 | NA   | 0.07 |
| chr6 | 39760803  | 39761078  | Mrps33        | ENSMUSG00000029918 | -56  | 0.11 | 0.12 | 0.12 | 0.21 | NA   | 0.13 |
| chr6 | 40421322  | 40421714  | Ssbp1         | ENSMUSG00000029911 | 167  | NA   | 0.38 | 0.09 | 0.13 | 0.08 | 0.11 |
| chr6 | 41555162  | 41555843  | Ephb6         | ENSMUSG00000029869 | 21   | NA   | 0.33 | 0.1  | 0.18 | 0.09 | 0.13 |
| chr6 | 42214829  | 42215349  | Casp2         | ENSMUSG00000029863 | 105  | 1    | NA   | 0.19 | 0.54 | NA   | 0.14 |
| chr6 | 47903267  | 47903638  | Zfp956        | ENSMUSG00000045466 | 63   | 0.08 | 0.11 | 0.12 | 0.11 | NA   | 0.1  |
| chr6 | 48504713  | 48504976  | Lrrc61        | ENSMUSG00000073096 | 49   | 0.5  | NA   | 0.22 | NA   | NA   | 0.13 |
| chr6 | 48579245  | 48579756  | AI854703      | ENSMUSG00000053297 | 1334 | 0.4  | 0.33 | 0.09 | 0.75 | NA   | 0.25 |
| chr6 | 49269177  | 49269608  | Ccdc126       | ENSMUSG00000050786 | 119  | NA   | 1    | 0.75 | 0.82 | 1    | 0.25 |
| chr6 | 49345410  | 49345823  | Stk31         | ENSMUSG00000023403 | 13   | NA   | NA   | 1    | NA   | 1    | 0.86 |
| chr6 | 49772265  | 49772868  | Npy           | ENSMUSG00000029819 | -143 | NA   | NA   | 0.16 | 0.17 | 0.13 | 0.17 |

|      |           |           |               |                    |       |      |      |      |      |      |      |
|------|-----------|-----------|---------------|--------------------|-------|------|------|------|------|------|------|
| chr6 | 52122473  | 52122810  | Hoxa3         | ENSMUSG00000079560 | 7     | NA   | NA   | NA   | NA   | 1    | NA   |
| chr6 | 52156445  | 52156653  | Hoxa5         | ENSMUSG00000038253 | -1963 | 1    | NA   | 1    | NA   | NA   | NA   |
| chr6 | 52161660  | 52161869  | Hoxa6         | ENSMUSG00000043219 | -409  | NA   | 1    | 0.34 | 0.71 | 0.92 | 0.35 |
| chr6 | 52199280  | 52199559  | Hoxa11as      | ENSMUSG00000086427 | 998   | NA   | 0.33 | 0.13 | 0.22 | 0.33 | 0.25 |
| chr6 | 54276909  | 54277280  | Prr15         | ENSMUSG00000045725 | 88    | NA   | 0.17 | 0.12 | 0.09 | 0.07 | 0.17 |
| chr6 | 56654403  | 56654719  | Lsm5          | ENSMUSG00000091625 | 89    | NA   | 0.86 | 0.08 | 0.53 | 0.17 | 0.34 |
| chr6 | 58590326  | 58590717  | Abcg2         | ENSMUSG00000029802 | -19   | NA   | NA   | 0.24 | 0.29 | 0.28 | 0.13 |
| chr6 | 65331239  | 65331608  | C130060K24Rik | ENSMUSG00000029917 | 135   | NA   | NA   | 0.1  | 0.13 | 0.08 | 0.19 |
| chr6 | 71093848  | 71094332  | Thns12        | ENSMUSG00000054474 | 235   | NA   | 1    | 0.27 | NA   | 0.14 | 0.17 |
| chr6 | 71858641  | 71858888  | Ptcd3         | ENSMUSG00000063884 | -8    | NA   | NA   | 0.13 | 0.27 | 0.11 | 0.13 |
| chr6 | 83036313  | 83036714  | Lbx2          | ENSMUSG00000034968 | 154   | NA   | 0.25 | 0.13 | 0.09 | 0.1  | 0.17 |
| chr6 | 83115645  | 83116060  | Dctn1         | ENSMUSG00000031865 | -62   | 0.33 | 0.33 | 0.25 | NA   | NA   | NA   |
| chr6 | 83456700  | 83457074  | Dguok         | ENSMUSG00000014554 | -72   | NA   | 1    | NA   | NA   | NA   | NA   |
| chr6 | 83725500  | 83725914  | Tex261        | ENSMUSG00000014748 | 45    | NA   | 0.76 | 0.12 | 0.16 | 0.2  | 0.15 |
| chr6 | 85324873  | 85325120  | Rab11fip5     | ENSMUSG00000051343 | -368  | NA   | 0.07 | 0.12 | 0.27 | 0.5  | 0.2  |
| chr6 | 85911077  | 85911704  | Dusp11        | ENSMUSG00000030002 | 211   | NA   | 1    | 0.2  | 0.54 | 0.17 | 0.27 |
| chr6 | 86346819  | 86347226  | Pcyox1        | ENSMUSG00000029998 | 115   | NA   | 1    | 0.17 | 0.43 | NA   | 0.14 |
| chr6 | 86959796  | 86960222  | Nfu1          | ENSMUSG00000029993 | 179   | NA   | 0.17 | 0.32 | 0.23 | 0.17 | 0.25 |
| chr6 | 87682658  | 87683059  | Ccdc48        | ENSMUSG00000068263 | 55    | NA   | NA   | 0.55 | NA   | NA   | NA   |
| chr6 | 87788571  | 87788976  | Isy1          | ENSMUSG00000030056 | -20   | NA   | 0.12 | 0.07 | 0.09 | 0.08 | 0.15 |
| chr6 | 90554865  | 90555081  | Slc41a3       | ENSMUSG00000030089 | 254   | NA   | NA   | 0.19 | 0.34 | NA   | 0.19 |
| chr6 | 90855561  | 90855838  | Ppp1r2-ps2    | ENSMUSG00000072894 | 6     | 1    | NA   | 0.62 | 1    | NA   | 0.95 |
| chr6 | 91106616  | 91107049  | Hdac11        | ENSMUSG00000034245 | 173   | NA   | 0.2  | 0.1  | 0.3  | 0.17 | 0.19 |
| chr6 | 97160674  | 97160886  | Arl6ip5       | ENSMUSG00000035199 | 97    | 1    | NA   | 1    | NA   | NA   | NA   |
| chr6 | 113419540 | 113419962 | Il17rc        | ENSMUSG00000030281 | -1670 | NA   | NA   | NA   | NA   | 0.67 | NA   |
| chr6 | 113588377 | 113588607 | Irak2         | ENSMUSG00000060477 | 31    | NA   | NA   | 0.17 | 0.2  | NA   | NA   |
| chr6 | 114232687 | 114233046 | Slc6a1        | ENSMUSG00000030310 | 237   | NA   | 0.27 | 0.15 | 0.24 | NA   | 0.12 |
| chr6 | 115551838 | 115552233 | Mkrm2         | ENSMUSG00000000439 | 86    | NA   | NA   | 0.08 | 0.25 | NA   | 0.29 |
| chr6 | 116123662 | 116123920 | Gm8203        | ENSMUSG00000060214 | 36    | NA   | NA   | 0.78 | 1    | NA   | 0.77 |
| chr6 | 116410744 | 116411228 | Alox5         | ENSMUSG00000025701 | 56    | NA   | 1    | 0.16 | 0.18 | 0.18 | 0.14 |

|      |           |           |               |                    |       |      |      |      |      |      |      |
|------|-----------|-----------|---------------|--------------------|-------|------|------|------|------|------|------|
| chr6 | 116623586 | 116623788 | Rassf4        | ENSMUSG00000042129 | 143   | NA   | NA   | 0.2  | NA   | NA   | 0.08 |
| chr6 | 117947812 | 117948026 | Gm4875        | ENSMUSG00000082791 | 694   | NA   | NA   | 1    | 1    | 1    | NA   |
| chr6 | 121134161 | 121134522 | Pex26         | ENSMUSG00000067825 | 425   | NA   | 0.38 | 0.17 | NA   | 0.19 | 0.16 |
| chr6 | 124690629 | 124691145 | Grcc10        | ENSMUSG00000072772 | -174  | NA   | NA   | 0.5  | NA   | 1    | 0.25 |
| chr6 | 125165548 | 125165979 | Vamp1         | ENSMUSG00000030337 | 194   | NA   | 0.27 | 0.15 | 0.28 | 0.2  | 0.19 |
| chr6 | 125311741 | 125312008 | Tnfrsf1a      | ENSMUSG00000030341 | 1429  | NA   | NA   | 0.24 | NA   | NA   | 0.3  |
| chr6 | 125330304 | 125330646 | Plekhg6       | ENSMUSG00000038167 | 336   | 0.5  | 0.28 | 0.12 | 0.33 | NA   | 0.14 |
| chr6 | 127100445 | 127100817 | Ccnd2         | ENSMUSG00000000184 | 435   | NA   | 0.09 | 0.09 | 0.16 | 0.11 | 0.18 |
| chr6 | 133055282 | 133055764 | 2700089E24Rik | ENSMUSG00000072704 | 266   | 1    | 0.67 | 0.07 | 0.12 | NA   | 0.12 |
| chr6 | 134779956 | 134780553 | Crebl2        | ENSMUSG00000032652 | 82    | NA   | 0.25 | 0.18 | 0.24 | 0.33 | 0.2  |
| chr6 | 134933554 | 134934149 | Apold1        | ENSMUSG00000090698 | 1832  | NA   | 0.19 | 0.08 | 0.12 | 0.2  | 0.09 |
| chr6 | 135015351 | 135015855 | Gprc5a        | ENSMUSG00000046733 | -66   | NA   | NA   | 0.33 | NA   | 1    | 0.56 |
| chr6 | 135682990 | 135683250 | Gm14329       | ENSMUSG00000086239 | 232   | 1    | NA   | 1    | 1    | NA   | 1    |
| chr6 | 136467121 | 136467699 | Atf7ip        | ENSMUSG00000030213 | 38    | 0.17 | 0.67 | 0.11 | 0.13 | NA   | 0.13 |
| chr6 | 136752552 | 136752891 | Hist4h4       | ENSMUSG00000068851 | 179   | NA   | NA   | 0.4  | NA   | NA   | 1    |
| chr6 | 137703000 | 137703232 | Dera          | ENSMUSG00000030225 | 53    | NA   | NA   | 0.13 | 0.16 | 0.24 | 0.16 |
| chr6 | 142363149 | 142363376 | B230216G23Rik | ENSMUSG00000071112 | 221   | NA   | NA   | 0.28 | 0.31 | 1    | 0.3  |
| chr6 | 144996878 | 144997333 | Bcat1         | ENSMUSG00000030268 | 227   | NA   | NA   | 0.12 | 0.09 | 0.04 | 0.16 |
| chr6 | 145024093 | 145024299 | Bcat1         | ENSMUSG00000030268 | 508   | NA   | 0.67 | 0.12 | NA   | 0.33 | 0.08 |
| chr6 | 145159380 | 145159744 | Casc1         | ENSMUSG00000043541 | -173  | NA   | 0.33 | 0.17 | 0.33 | 0.11 | 0.1  |
| chr6 | 146744474 | 146744709 | Arntl2        | ENSMUSG00000040187 | 14    | NA   | 0.65 | 0.14 | 0.21 | 0.09 | 0.32 |
| chr6 | 147995754 | 147996020 | Far2          | ENSMUSG00000030303 | 106   | NA   | NA   | 0.27 | 0.38 | 0.75 | 0.21 |
| chr6 | 148779726 | 148780194 | Ipo8          | ENSMUSG00000040029 | -12   | NA   | 0.19 | 0.12 | 0.25 | 0.13 | 0.24 |
| chr7 | 20014722  | 20014950  | Mark4         | ENSMUSG00000030397 | -1186 | 0.21 | 0.31 | 0.69 | 0.73 | 0.69 | 0.8  |
| chr7 | 13623236  | 13623979  | Ube2m         | ENSMUSG00000005575 | 12    | 0.46 | 0.06 | 0.09 | 0.2  | 0.13 | 0.15 |
| chr7 | 118225462 | 118227015 | Eif4g2        | ENSMUSG00000005610 | -529  | 0.38 | 0.17 | 0.15 | 0.21 | 0.18 | 0.15 |
| chr7 | 114513814 | 114515013 | Syt9          | ENSMUSG00000062542 | 171   | 0.15 | 0.12 | 0.1  | 0.11 | 0.04 | 0.11 |
| chr7 | 29856628  | 29856979  | Gm16799       | ENSMUSG00000087096 | 181   | 0.24 | 0.07 | 0.1  | 0.07 | 0.05 | 0.1  |
| chr7 | 134732229 | 134732659 | Rnf40         | ENSMUSG00000030816 | 232   | 0.29 | 0.24 | 0.08 | 0.15 | 0.08 | 0.11 |
| chr7 | 89136563  | 89137632  | 4833418N17Rik | ENSMUSG00000052779 | 209   | 0.37 | 0.23 | 0.11 | 0.15 | 0.13 | 0.13 |

|      |           |           |               |                     |      |      |      |      |      |      |      |
|------|-----------|-----------|---------------|---------------------|------|------|------|------|------|------|------|
| chr7 | 127778251 | 127779311 | Uqcrc2        | ENSMUSG00000030884  | 91   | 0.45 | 0.16 | 0.11 | 0.16 | 0.08 | 0.16 |
| chr7 | 29123168  | 29124049  | Supt5h        | ENSMUSG00000003435  | 130  | 0.25 | 0.11 | 0.09 | 0.19 | 0.07 | 0.15 |
| chr7 | 25316451  | 25316926  | Irgq          | ENSMUSG000000041037 | 1021 | 1    | 0.19 | 0.07 | 0.17 | 0.19 | 0.15 |
| chr7 | 105851201 | 105852117 | Gm15506       | ENSMUSG000000086477 | -221 | 0.19 | 0.12 | 0.11 | 0.13 | 0.05 | 0.19 |
| chr7 | 121397630 | 121398195 | Copb1         | ENSMUSG000000030754 | 282  | 0.72 | 0.22 | 0.09 | 0.15 | 0.18 | 0.18 |
| chr7 | 120350323 | 120352150 | Arntl         | ENSMUSG000000055116 | 257  | 0.21 | 0.15 | 0.15 | 0.19 | 0.1  | 0.18 |
| chr7 | 29135552  | 29136165  | Rps16         | ENSMUSG000000037563 | 187  | 0.9  | 0.15 | 0.11 | 0.27 | 0.22 | 0.17 |
| chr7 | 142602161 | 142602484 | Foxi2         | ENSMUSG000000048377 | 272  | 0.2  | 0.15 | 0.1  | 0.18 | 0.1  | 0.12 |
| chr7 | 48154148  | 48155595  | Vstm2b        | ENSMUSG000000039257 | 223  | 0.22 | 0.11 | 0.09 | 0.15 | 0.1  | 0.13 |
| chr7 | 149849814 | 149850293 | Igf2as        | ENSMUSG000000086266 | -990 | 0.57 | 0.23 | 0.16 | 0.24 | 0.14 | 0.18 |
| chr7 | 51846398  | 51847178  | Kcnc3         | ENSMUSG000000062785 | 532  | 0.37 | 0.36 | 0.11 | 0.15 | 0.16 | 0.12 |
| chr7 | 119369244 | 119369828 | Mical2        | ENSMUSG000000038244 | 166  | 0.53 | 0.45 | 0.14 | 0.22 | 0.23 | 0.14 |
| chr7 | 19867825  | 19868473  | Rtn2          | ENSMUSG000000030401 | 138  | 0.24 | 0.15 | 0.09 | 0.16 | 0.08 | 0.16 |
| chr7 | 140004629 | 140005681 | Fam53b        | ENSMUSG000000030956 | -377 | 0.09 | 0.17 | 0.09 | 0.12 | 0.2  | 0.12 |
| chr7 | 137662575 | 137663628 | Ate1          | ENSMUSG000000030850 | -48  | 0.8  | 0.23 | 0.1  | 0.17 | 0.08 | 0.13 |
| chr7 | 63274634  | 63275049  | Nipa1         | ENSMUSG000000047037 | 483  | 0.4  | 0.36 | 0.14 | 0.14 | 0.14 | 0.17 |
| chr7 | 89078413  | 89079640  | Hdgfrp3       | ENSMUSG000000025104 | -117 | 0.35 | 0.23 | 0.09 | 0.17 | 0.11 | 0.11 |
| chr7 | 135831483 | 135832096 | Inpp5f        | ENSMUSG000000042105 | -214 | 0.58 | 0.39 | 0.48 | 0.6  | 0.22 | 0.57 |
| chr7 | 108469541 | 108470458 | Stard10       | ENSMUSG000000030688 | 372  | 0.22 | 0.16 | 0.13 | 0.19 | 0.1  | 0.14 |
| chr7 | 36539078  | 36539580  | Dpy19l3       | ENSMUSG000000043671 | 45   | 0.71 | 0.15 | 0.08 | 0.16 | 0.2  | 0.15 |
| chr7 | 87515502  | 87516445  | Man2a2        | ENSMUSG000000038886 | 99   | 0.19 | 0.12 | 0.11 | 0.13 | 0.08 | 0.14 |
| chr7 | 36340052  | 36340990  | Nudt19        | ENSMUSG000000034875 | -308 | 0.26 | 0.37 | 0.12 | 0.15 | 0.09 | 0.16 |
| chr7 | 87546791  | 87547488  | Furin         | ENSMUSG000000030530 | 509  | 0.31 | 0.23 | 0.11 | 0.11 | 0.14 | 0.12 |
| chr7 | 139346110 | 139346399 | Cpxm2         | ENSMUSG000000030862 | 51   | 0.27 | 0.11 | 0.09 | 0.19 | 0.07 | 0.16 |
| chr7 | 4728492   | 4728927   | Il11          | ENSMUSG000000004371 | 1034 | 0.89 | 0.41 | 0.13 | 0.33 | 0.28 | 0.27 |
| chr7 | 136400113 | 136400703 | Ppapdc1a      | ENSMUSG000000070366 | -200 | 0.16 | 0.07 | 0.1  | 0.12 | 0.06 | 0.18 |
| chr7 | 13063592  | 13064104  | Zfp606        | ENSMUSG000000030386 | 206  | 0.46 | 0.35 | 0.09 | 0.19 | 0.1  | 0.1  |
| chr7 | 53434828  | 53435597  | Abcc8         | ENSMUSG000000040136 | 191  | 0.75 | 0.62 | 0.17 | 0.25 | 0.14 | 0.16 |
| chr7 | 3581293   | 3581658   | Tfpt          | ENSMUSG000000006335 | 11   | 0.23 | 0.15 | 0.12 | 0.1  | 0.08 | 0.14 |
| chr7 | 127741258 | 127741538 | E130201H02Rik | ENSMUSG000000044141 | 234  | 0.29 | 0.19 | 0.12 | 0.25 | 0.11 | 0.17 |

|      |           |           |               |                    |       |      |      |      |      |      |      |
|------|-----------|-----------|---------------|--------------------|-------|------|------|------|------|------|------|
| chr7 | 19813301  | 19814124  | Opa3          | ENSMUSG00000052214 | 29    | 0.25 | 0.13 | 0.09 | 0.16 | 0.08 | 0.17 |
| chr7 | 71432291  | 71432948  | Mtmr10        | ENSMUSG00000030522 | 80    | 0.11 | 0.19 | 0.15 | 0.15 | 0.28 | 0.16 |
| chr7 | 137789526 | 137789975 | Tacc2         | ENSMUSG00000030852 | 5     | 0.26 | 0.17 | 0.13 | 0.18 | 0.08 | 0.11 |
| chr7 | 29052770  | 29053530  | Eid2          | ENSMUSG00000046058 | 250   | 0.22 | 0.14 | 0.12 | 0.16 | 0.11 | 0.13 |
| chr7 | 6106718   | 6108093   | Zfp787        | ENSMUSG00000046792 | 168   | 0.22 | 0.08 | 0.1  | 0.19 | 0.09 | 0.15 |
| chr7 | 85723540  | 85723839  | Gm9885        | ENSMUSG00000052629 | -27   | 0.33 | 0.07 | 0.1  | 0.19 | 0.1  | 0.11 |
| chr7 | 148401507 | 148402149 | Rassf7        | ENSMUSG00000038618 | 69    | 0.12 | 0.18 | 0.09 | 0.17 | 1    | 0.15 |
| chr7 | 151924285 | 151924584 | Ano1          | ENSMUSG00000031075 | -51   | 0.24 | 0.19 | 0.18 | 0.19 | 0.09 | 0.11 |
| chr7 | 130113131 | 130114319 | Rbbp6         | ENSMUSG00000030779 | -353  | 0.17 | 0.15 | 0.12 | 0.15 | 0.08 | 0.15 |
| chr7 | 36119230  | 36120148  | Rhpn2         | ENSMUSG00000030494 | 340   | 0.22 | 0.06 | 0.11 | 0.16 | 0.05 | 0.19 |
| chr7 | 30569166  | 30569564  | Zfp30         | ENSMUSG00000047473 | 262   | 0.53 | 0.43 | 0.26 | 0.22 | 0.22 | 0.2  |
| chr7 | 27951139  | 27951971  | Egln2         | ENSMUSG00000058709 | -254  | 0.07 | 0.11 | 0.11 | 0.18 | 0.22 | 0.17 |
| chr7 | 120512556 | 120513500 | Btbd10        | ENSMUSG00000038187 | -178  | 0.3  | 0.14 | 0.1  | 0.15 | 0.11 | 0.12 |
| chr7 | 81699075  | 81699942  | Slco3a1       | ENSMUSG00000025790 | -148  | 0.25 | 0.18 | 0.11 | 0.15 | 0.14 | 0.12 |
| chr7 | 138505780 | 138506892 | 2310057M21Rik | ENSMUSG00000040177 | -124  | 0.47 | 0.21 | 0.14 | 0.38 | 0.21 | 0.28 |
| chr7 | 152023824 | 152025569 | Fgf3          | ENSMUSG00000031074 | 708   | 0.4  | 0.36 | 0.17 | 0.24 | 0.2  | 0.21 |
| chr7 | 112884632 | 112885829 | Rrp8          | ENSMUSG00000030888 | -343  | 0.36 | 0.31 | 0.12 | 0.19 | 0.17 | 0.2  |
| chr7 | 125633307 | 125635552 | Itpr1l2       | ENSMUSG00000073858 | 419   | 0.26 | 0.14 | 0.12 | 0.19 | 0.16 | 0.2  |
| chr7 | 31348185  | 31348521  | Psenen        | ENSMUSG00000036835 | -150  | 0.6  | 0.3  | 0.16 | 0.19 | 0.3  | 0.14 |
| chr7 | 52621947  | 52623147  | Ppfia3        | ENSMUSG0000003863  | -463  | 0.19 | 0.15 | 0.11 | 0.14 | 0.08 | 0.11 |
| chr7 | 128061137 | 128061943 | Polr3e        | ENSMUSG00000030880 | 282   | 0.13 | 0.13 | 0.08 | 0.11 | 0.08 | 0.12 |
| chr7 | 142729391 | 142730296 | Ptpre         | ENSMUSG00000041836 | 336   | 0.17 | 0.09 | 0.1  | 0.13 | 0.09 | 0.12 |
| chr7 | 3655499   | 3656359   | Rps9          | ENSMUSG00000006333 | 334   | 0.61 | 0.15 | 0.3  | 0.46 | 0.35 | 0.33 |
| chr7 | 52417570  | 52417859  | Slc17a7       | ENSMUSG00000070570 | -1577 | 0.29 | 0.13 | 0.1  | 0.17 | 0.1  | 0.12 |
| chr7 | 133920275 | 133920789 | Gm9967        | ENSMUSG00000055323 | -200  | 0.6  | 0.1  | 0.14 | 0.18 | 0.09 | 0.17 |
| chr7 | 13563190  | 13563645  | Zfp446        | ENSMUSG00000033961 | 220   | 1    | 0.71 | 0.25 | 0.55 | 0.54 | 0.26 |
| chr7 | 25757059  | 25757306  | Rabac1        | ENSMUSG0000003380  | 523   | 0.46 | 0.39 | 0.11 | 0.25 | 0.15 | 0.14 |
| chr7 | 29551300  | 29551987  | Nfkbib        | ENSMUSG00000030595 | -143  | 0.58 | 0.33 | 0.1  | 0.23 | 0.16 | 0.15 |
| chr7 | 35015084  | 35015415  | Gpi1          | ENSMUSG00000036427 | 51    | 1    | 0.19 | 0.1  | 0.1  | 0.1  | 0.14 |
| chr7 | 57230304  | 57231320  | Nell1         | ENSMUSG00000055409 | 373   | 0.5  | 0.13 | 0.1  | 0.17 | 0.16 | 0.13 |

|      |           |           |               |                    |      |      |      |      |      |      |      |
|------|-----------|-----------|---------------|--------------------|------|------|------|------|------|------|------|
| chr7 | 149844853 | 149847223 | Igf2          | ENSMUSG00000048583 | -644 | 0.17 | 0.2  | 0.13 | 0.17 | 0.1  | 0.15 |
| chr7 | 52003923  | 52004188  | Vrk3          | ENSMUSG00000002205 | 101  | 0.29 | 0.09 | 0.1  | 0.17 | 0.08 | 0.08 |
| chr7 | 29237194  | 29237503  | Lfn1          | ENSMUSG00000030600 | 91   | 0.08 | 0.52 | 0.15 | 0.12 | 0.31 | 0.11 |
| chr7 | 19703581  | 19703882  | Gm4969        | ENSMUSG00000085601 | -41  | 1    | 0.67 | 0.52 | 0.4  | 0.45 | 0.4  |
| chr7 | 5077434   | 5077709   | Rasl2-9-ps    | ENSMUSG00000083649 | -19  | 0.11 | 0.25 | 0.13 | 0.25 | 0.27 | 0.19 |
| chr7 | 74516932  | 74518398  | Mef2a         | ENSMUSG00000030557 | 48   | 0.31 | 0.19 | 0.13 | 0.15 | 0.19 | 0.15 |
| chr7 | 63097352  | 63098057  | Cyfp1         | ENSMUSG00000030447 | 263  | 0.26 | 0.13 | 0.1  | 0.17 | 0.15 | 0.14 |
| chr7 | 52968729  | 52968985  | Sphk2         | ENSMUSG00000057342 | 1720 | 0.73 | 0.85 | 0.7  | 0.78 | 0.96 | 0.94 |
| chr7 | 134851792 | 134852513 | Mir762        | ENSMUSG00000076454 | 151  | 0.1  | 0.32 | 0.14 | 0.16 | 0.22 | 0.14 |
| chr7 | 149573576 | 149573933 | Ctsd          | ENSMUSG00000007891 | -30  | 0.26 | 0.3  | 0.12 | 0.1  | 0.11 | 0.19 |
| chr7 | 135088200 | 135088418 | Prss36        | ENSMUSG00000070371 | 1930 | 0.46 | 0.25 | 0.12 | 0.19 | 0.2  | 0.17 |
| chr7 | 54050979  | 54051763  | Hps5          | ENSMUSG00000014418 | -323 | 0.37 | 0.13 | 0.12 | 0.17 | 0.15 | 0.16 |
| chr7 | 52883788  | 52884451  | Rasip1        | ENSMUSG00000044562 | 1223 | 0.22 | 0.09 | 0.11 | 0.11 | 0.08 | 0.11 |
| chr7 | 86611538  | 86611745  | Polg          | ENSMUSG00000039176 | -393 | 0.32 | 0.09 | 0.09 | 0.24 | 0.09 | 0.21 |
| chr7 | 128125231 | 128126237 | Cdr2          | ENSMUSG00000030878 | -430 | 0.14 | 0.19 | 0.14 | 0.23 | 0.05 | 0.15 |
| chr7 | 86197689  | 86198410  | Gm16936       | ENSMUSG00000087186 | 160  | 0.22 | 0.25 | 0.09 | 0.18 | 0.11 | 0.15 |
| chr7 | 13420245  | 13420557  | Zfp110        | ENSMUSG00000058638 | 15   | 1    | 0.5  | 0.15 | 0.57 | 0.11 | 0.24 |
| chr7 | 134351544 | 134352219 | Tbc1d10b      | ENSMUSG00000042492 | 101  | 0.09 | 0.1  | 0.07 | 0.1  | 0.14 | 0.14 |
| chr7 | 149718790 | 149719230 | Mrpl23        | ENSMUSG00000037772 | 93   | 1    | 0.33 | 0.09 | 0.23 | 0.12 | 0.16 |
| chr7 | 17529897  | 17530279  | Pnmal2        | ENSMUSG00000070802 | 57   | 1    | 0.19 | 0.05 | 0.07 | 0.05 | 0.16 |
| chr7 | 86649658  | 86650368  | Mir9-3        | ENSMUSG00000093238 | -137 | 0.23 | 0.1  | 0.1  | 0.11 | 0.12 | 0.17 |
| chr7 | 123175157 | 123176022 | 1110006G14Rik | ENSMUSG00000030664 | 96   | 0.15 | 0.12 | 0.13 | 0.14 | 0.09 | 0.16 |
| chr7 | 25118341  | 25118996  | 1700008P20Rik | ENSMUSG00000055826 | 316  | 0.75 | 0.7  | 0.36 | 0.65 | 0.59 | 0.44 |
| chr7 | 85722809  | 85723319  | Ntrk3         | ENSMUSG00000059146 | -203 | 1    | 0.11 | 0.11 | 0.12 | 0.11 | 0.06 |
| chr7 | 121558443 | 121560099 | 4933406I18Rik | ENSMUSG00000087475 | -736 | 0.29 | 0.19 | 0.1  | 0.14 | 0.18 | 0.11 |
| chr7 | 75893750  | 75894094  | Arrdc4        | ENSMUSG00000042659 | 152  | 0.15 | 0.09 | 0.1  | 0.21 | 0.31 | 0.07 |
| chr7 | 106416004 | 106417758 | Mtap6         | ENSMUSG00000055407 | 25   | 0.23 | 0.13 | 0.1  | 0.16 | 0.14 | 0.15 |
| chr7 | 103358299 | 103359601 | Odz4          | ENSMUSG00000048078 | 294  | 0.22 | 0.14 | 0.08 | 0.13 | 0.12 | 0.14 |
| chr7 | 103360187 | 103360389 | Odz4          | ENSMUSG00000048078 | 107  | 1    | 0.25 | 0.07 | 0.39 | 0.22 | 0.17 |
| chr7 | 29163390  | 29163636  | Zfp36         | ENSMUSG00000044786 | 761  | 1    | 0.43 | 0.23 | 0.31 | 0.34 | 0.36 |

|      |           |           |               |                    |      |      |      |      |      |      |      |
|------|-----------|-----------|---------------|--------------------|------|------|------|------|------|------|------|
| chr7 | 64846182  | 64847441  | Gabrb3        | ENSMUSG00000033676 | 279  | 0.26 | 0.21 | 0.08 | 0.16 | 0.14 | 0.12 |
| chr7 | 116582283 | 116582877 | Stk33         | ENSMUSG00000031027 | -249 | 0.31 | 0.14 | 0.14 | 0.15 | 0.12 | 0.1  |
| chr7 | 107755651 | 107757063 | Rab6a         | ENSMUSG00000030704 | 433  | 0.2  | 0.16 | 0.11 | 0.14 | 0.11 | 0.15 |
| chr7 | 131126086 | 131127385 | Hs3st4        | ENSMUSG00000078591 | 352  | 0.26 | 0.24 | 0.09 | 0.14 | 0.16 | 0.13 |
| chr7 | 145588621 | 145589780 | Tcerg1l       | ENSMUSG00000091002 | 211  | 0.17 | 0.09 | 0.07 | 0.15 | 0.09 | 0.13 |
| chr7 | 148513135 | 148514404 | Deaf1         | ENSMUSG00000058886 | -354 | 0.67 | 0.17 | 0.11 | 0.19 | 0.26 | 0.17 |
| chr7 | 128850073 | 128851024 | 1700069B07Rik | ENSMUSG00000053081 | -155 | 0.12 | 0.12 | 0.1  | 0.09 | 0.07 | 0.11 |
| chr7 | 140829012 | 140830030 | 2700050L05Rik | ENSMUSG00000039990 | 295  | 0.26 | 0.33 | 0.17 | 0.18 | 0.12 | 0.23 |
| chr7 | 91838038  | 91838484  | 2610206C17Rik | ENSMUSG00000085236 | 111  | 0.11 | 0.09 | 0.12 | 0.12 | 0.05 | 0.13 |
| chr7 | 106616731 | 106617611 | Kihl35        | ENSMUSG00000035298 | -302 | 0.09 | 0.1  | 0.11 | 0.12 | 0.14 | 0.14 |
| chr7 | 107520227 | 107520569 | Ppme1         | ENSMUSG00000030718 | 8    | 0.19 | 0.07 | 0.08 | 0.14 | 0.07 | 0.14 |
| chr7 | 135018963 | 135020699 | Zfp668        | ENSMUSG00000049728 | -671 | 0.2  | 0.1  | 0.13 | 0.14 | 0.13 | 0.18 |
| chr7 | 25332024  | 25332403  | Xrcc1         | ENSMUSG00000051768 | 44   | 0.08 | 0.08 | 0.08 | 0.18 | 0.17 | 0.09 |
| chr7 | 87259859  | 87260549  | Idh2          | ENSMUSG00000030541 | 14   | 0.1  | 0.09 | 0.1  | 0.14 | 0.15 | 0.12 |
| chr7 | 96551947  | 96552252  | Tmem135       | ENSMUSG00000039428 | 633  | 0.23 | 0.23 | 0.14 | 0.17 | 0.08 | 0.12 |
| chr7 | 104099915 | 104100448 | C230038L03Rik | ENSMUSG00000085560 | -191 | 0.12 | 0.16 | 0.11 | 0.26 | 0.36 | 0.2  |
| chr7 | 28964419  | 28965444  | Dyrk1b        | ENSMUSG00000002409 | 443  | 0.41 | 0.26 | 0.14 | 0.21 | 0.15 | 0.12 |
| chr7 | 112630303 | 112630879 | Prkcdbp       | ENSMUSG00000037060 | 120  | 0.36 | 0.32 | 0.15 | 0.16 | 0.12 | 0.13 |
| chr7 | 129276098 | 129276787 | Palb2         | ENSMUSG00000044702 | -84  | 0.13 | 0.1  | 0.09 | 0.16 | 0.06 | 0.16 |
| chr7 | 73006672  | 73007840  | RP23-181K4.1  | ENSMUSG00000093405 | -378 | 0.12 | 0.09 | 0.12 | 0.15 | 0.08 | 0.1  |
| chr7 | 5012621   | 5014214   | U2af2         | ENSMUSG00000030435 | -328 | 0.28 | 0.25 | 0.11 | 0.25 | 0.16 | 0.13 |
| chr7 | 28271846  | 28272597  | Sertad1       | ENSMUSG00000008384 | 292  | 0.26 | 0.13 | 0.12 | 0.14 | 0.12 | 0.14 |
| chr7 | 51808889  | 51809414  | Nr1h2         | ENSMUSG00000060601 | -95  | 0.33 | 0.47 | 0.14 | 0.25 | 0.18 | 0.15 |
| chr7 | 91558054  | 91558847  | Arnt2         | ENSMUSG00000015709 | 19   | 0.53 | 0.24 | 0.23 | 0.34 | 0.2  | 0.22 |
| chr7 | 28122564  | 28122834  | Ltbp4         | ENSMUSG00000040488 | 12   | 0.33 | 0.07 | 0.14 | 0.31 | 0.12 | 0.22 |
| chr7 | 116154222 | 116154783 | Tub           | ENSMUSG00000031028 | 163  | 0.22 | 0.11 | 0.09 | 0.1  | 0.09 | 0.09 |
| chr7 | 123236595 | 123237037 | 1700003G18Rik | ENSMUSG00000087621 | -196 | 0.06 | 0.04 | 0.13 | 0.17 | 0.13 | 0.14 |
| chr7 | 134339115 | 134339691 | Cd2bp2        | ENSMUSG00000042502 | -14  | 0.11 | 0.24 | 0.12 | 0.12 | 0.26 | 0.12 |
| chr7 | 134005277 | 134006164 | Ino80e        | ENSMUSG00000030689 | -415 | 0.59 | 0.29 | 0.23 | 0.18 | 0.33 | 0.2  |
| chr7 | 139767576 | 139768178 | Oat           | ENSMUSG00000030934 | 204  | 0.27 | 0.24 | 0.12 | 0.17 | 0.13 | 0.1  |

|      |           |           |         |                    |       |      |      |      |      |      |      |
|------|-----------|-----------|---------|--------------------|-------|------|------|------|------|------|------|
| chr7 | 80520133  | 80521230  | Rgma    | ENSMUSG00000070509 | 275   | 0.13 | 0.11 | 0.15 | 0.15 | 0.08 | 0.2  |
| chr7 | 117365199 | 117365761 | Swap70  | ENSMUSG00000031015 | 263   | 0.24 | 0.15 | 0.14 | 0.15 | 0.12 | 0.19 |
| chr7 | 133838856 | 133839865 | Bola2   | ENSMUSG00000047721 | 445   | 0.31 | 0.25 | 0.11 | 0.18 | 0.16 | 0.16 |
| chr7 | 16858017  | 16859052  | Prr24   | ENSMUSG00000091811 | 507   | 0.18 | 0.14 | 0.1  | 0.17 | 0.09 | 0.15 |
| chr7 | 26067273  | 26067993  | Cic     | ENSMUSG00000005442 | -196  | 0.24 | 0.26 | 0.12 | 0.32 | 0.49 | 0.15 |
| chr7 | 128177919 | 128178776 | Mettl9  | ENSMUSG00000030876 | 388   | 0.15 | 0.14 | 0.09 | 0.13 | 0.08 | 0.14 |
| chr7 | 148725549 | 148725972 | Chid1   | ENSMUSG00000025512 | -57   | 0.17 | 0.26 | 0.16 | 0.3  | 1    | 0.25 |
| chr7 | 53179673  | 53179938  | Ccdc114 | ENSMUSG00000040189 | 192   | 0.83 | 0.82 | 0.6  | 0.69 | 0.5  | 0.42 |
| chr7 | 96665821  | 96666332  | Prss23  | ENSMUSG00000039405 | 20    | 0.14 | 0.26 | 0.11 | 0.11 | 0.23 | 0.1  |
| chr7 | 31758128  | 31758537  | Lsr     | ENSMUSG00000001247 | 76    | 0.16 | 0.1  | 0.11 | 0.09 | 0.26 | 0.1  |
| chr7 | 134984926 | 134985865 | Stx4a   | ENSMUSG00000030805 | 117   | 0.15 | 0.09 | 0.11 | 0.15 | 0.08 | 0.14 |
| chr7 | 35460239  | 35461227  | Gm12756 | ENSMUSG00000087127 | -1715 | 0.31 | 0.28 | 0.12 | 0.17 | 0.25 | 0.16 |
| chr7 | 104886355 | 104886919 | Aqp11   | ENSMUSG00000042797 | -102  | 0.29 | 0.23 | 0.16 | 0.15 | 0.08 | 0.14 |
| chr7 | 107855027 | 107855572 | Fam168a | ENSMUSG00000029461 | 134   | 0.14 | 0.15 | 0.07 | 0.21 | 0.26 | 0.12 |
| chr7 | 73532506  | 73533298  | Lrrk1   | ENSMUSG00000015133 | 291   | 0.23 | 0.34 | 0.12 | 0.15 | 0.12 | 0.16 |
| chr7 | 4989861   | 4990251   | Zfp784  | ENSMUSG00000043290 | -8    | 0.2  | 0.13 | 0.15 | 0.14 | 0.09 | 0.12 |
| chr7 | 73205340  | 73205816  | Snrpa1  | ENSMUSG00000030512 | 148   | 0.2  | 0.11 | 0.08 | 0.17 | 0.12 | 0.16 |
| chr7 | 28231459  | 28231759  | Spnb4   | ENSMUSG00000011751 | -73   | 0.11 | 0.1  | 0.06 | 0.07 | 0.05 | 0.13 |
| chr7 | 25217216  | 25218314  | Irgc1   | ENSMUSG00000062028 | 644   | 0.73 | 0.9  | 0.68 | 0.71 | 0.58 | 0.57 |
| chr7 | 20043404  | 20044077  | Mark4   | ENSMUSG00000030397 | 103   | 0.26 | 0.16 | 0.14 | 0.21 | 0.12 | 0.15 |
| chr7 | 35902918  | 35905759  | Cebpa   | ENSMUSG00000034957 | 26    | 0.19 | 0.12 | 0.14 | 0.18 | 0.13 | 0.15 |
| chr7 | 104548475 | 104548897 | Ndufc2  | ENSMUSG00000030647 | 173   | 0.54 | 0.49 | 0.21 | 0.3  | 0.43 | 0.23 |
| chr7 | 88598472  | 88600400  | Cpeb1   | ENSMUSG00000025586 | 208   | 0.12 | 0.16 | 0.11 | 0.13 | 0.08 | 0.13 |
| chr7 | 135380770 | 135382077 | Armc5   | ENSMUSG00000042178 | 552   | 0.22 | 0.24 | 0.14 | 0.16 | 0.11 | 0.14 |
| chr7 | 20092377  | 20093025  | Bloc1s3 | ENSMUSG00000057667 | 979   | 0.11 | 0.15 | 0.12 | 0.2  | 0.2  | 0.18 |
| chr7 | 52094927  | 52095679  | Il4i1   | ENSMUSG00000074141 | 594   | 0.22 | 0.27 | 0.37 | 0.43 | 0.45 | 0.32 |
| chr7 | 129210302 | 129211390 | Ears2   | ENSMUSG00000030871 | -321  | 0.11 | 0.18 | 0.13 | 0.16 | 0.05 | 0.17 |
| chr7 | 31373299  | 31373560  | Wbp7    | ENSMUSG00000006307 | 307   | 0.07 | 0.16 | 0.08 | 0.14 | 0.18 | 0.1  |
| chr7 | 4866678   | 4867147   | Zfp628  | ENSMUSG00000074406 | 93    | 0.14 | 0.13 | 0.14 | 0.21 | 0.29 | 0.15 |
| chr7 | 29957798  | 29958109  | Ggn     | ENSMUSG00000031493 | 1737  | 0.15 | 0.17 | 0.37 | 0.32 | 0.4  | 0.57 |



|      |           |           |               |                    |     |      |      |      |      |      |      |
|------|-----------|-----------|---------------|--------------------|-----|------|------|------|------|------|------|
| chr7 | 20147077  | 20148038  | Ppp1r37       | ENSMUSG00000051403 | 190 | 0.21 | 0.14 | 0.1  | 0.18 | 0.11 | 0.12 |
| chr7 | 127986243 | 127987217 | Eef2k         | ENSMUSG00000035064 | 385 | 0.33 | 0.15 | 0.09 | 0.13 | 0.14 | 0.15 |
| chr7 | 130512940 | 130513144 | Arhgap17      | ENSMUSG00000030766 | 387 | 0.23 | 0.17 | 0.08 | 0.21 | 0.06 | 0.15 |
| chr7 | 146271852 | 146272661 | Dpysl4        | ENSMUSG00000025478 | 356 | 0.46 | 0.17 | 0.19 | 0.22 | 0.31 | 0.17 |
| chr7 | 52661621  | 52662395  | Kcna7         | ENSMUSG00000038201 | 678 | 0.13 | 0.1  | 0.11 | 0.16 | 0.09 | 0.12 |
| chr7 | 19893969  | 19895799  | Fosb          | ENSMUSG0000003545  | 510 | 0.22 | 0.14 | 0.12 | 0.19 | 0.15 | 0.15 |
| chr7 | 86644709  | 86645167  | Al854517      | ENSMUSG00000085554 | -65 | 0.22 | 0.15 | 0.07 | 0.09 | 0.09 | 0.11 |
| chr7 | 148445609 | 148445875 | Phrf1         | ENSMUSG00000038611 | 185 | 0.87 | 0.73 | 0.71 | 0.79 | 1    | 0.9  |
| chr7 | 91234742  | 91235296  | 9930013L23Rik | ENSMUSG00000052353 | -7  | 0.29 | 0.1  | 0.11 | 0.15 | 0.15 | 0.09 |
| chr7 | 120097338 | 120098946 | Rassf10       | ENSMUSG00000048962 | 434 | 0.14 | 0.12 | 0.1  | 0.15 | 0.1  | 0.13 |
| chr7 | 20407840  | 20408111  | Bcl3          | ENSMUSG00000053175 | 129 | 0.22 | 0.13 | 0.09 | 0.13 | 0.11 | 0.1  |
| chr7 | 105983356 | 105983850 | Wnt11         | ENSMUSG00000015957 | -19 | 0.15 | 0.15 | 0.09 | 0.13 | 0.08 | 0.13 |
| chr7 | 69522068  | 69522345  | Magel2        | ENSMUSG00000056972 | 341 | 0.19 | 0.21 | 0.33 | 0.29 | 0.33 | 0.41 |
| chr7 | 134655421 | 134656518 | Srcap         | ENSMUSG00000053877 | 428 | 1    | 0.31 | 0.16 | 0.15 | 0.45 | 0.15 |
| chr7 | 6682773   | 6683109   | Peg3          | ENSMUSG00000002265 | 189 | 0.46 | 0.23 | 0.44 | 0.44 | 0.29 | 0.6  |
| chr7 | 86937529  | 86938396  | Mesp1         | ENSMUSG00000030544 | 712 | 0.12 | 0.18 | 0.1  | 0.17 | 0.25 | 0.2  |
| chr7 | 147129611 | 147130861 | Utf1          | ENSMUSG00000047751 | 548 | 0.21 | 0.2  | 0.13 | 0.19 | 0.13 | 0.2  |
| chr7 | 99889579  | 99889954  | 4632427E13Rik | ENSMUSG00000074024 | 203 | 0.24 | 0.1  | 0.07 | 0.13 | 0.1  | 0.12 |
| chr7 | 134758096 | 134758449 | Zfp629        | ENSMUSG00000045639 | 109 | 0.3  | 0.55 | 0.19 | 0.13 | 0.18 | 0.22 |
| chr7 | 148640972 | 148641459 | Pnpla2        | ENSMUSG00000025509 | 118 | 0.37 | 0.42 | 0.16 | 0.28 | 0.16 | 0.26 |
| chr7 | 91030734  | 91033103  | Mesdc1        | ENSMUSG00000070462 | 933 | 0.17 | 0.18 | 0.16 | 0.17 | 0.22 | 0.12 |
| chr7 | 140122528 | 140123535 | Zranb1        | ENSMUSG00000030967 | 206 | 0.1  | 0.06 | 0.09 | 0.12 | 0.07 | 0.12 |
| chr7 | 146574935 | 146575499 | Inpp5a        | ENSMUSG00000025477 | 209 | 0.11 | 0.09 | 0.09 | 0.13 | 0.07 | 0.1  |
| chr7 | 52118872  | 52119167  | Ptov1         | ENSMUSG00000038502 | 324 | 0.33 | 0.39 | 0.44 | 0.45 | 0.73 | 0.56 |
| chr7 | 31018463  | 31018707  | Polr2i        | ENSMUSG00000019738 | 634 | 0.58 | 0.34 | 0.3  | 0.45 | 0.75 | 0.35 |
| chr7 | 105293588 | 105293790 | Omp           | ENSMUSG00000074006 | 323 | 0.68 | 0.91 | 0.74 | 0.86 | 0.92 | 0.96 |
| chr7 | 135038917 | 135039202 | Vkorc1        | ENSMUSG00000030804 | -91 | 0.67 | NA   | 0.16 | 0.24 | 0.28 | 0.19 |
| chr7 | 106529834 | 106530837 | Gdpd5         | ENSMUSG00000035314 | 276 | 0.28 | 0.15 | 0.13 | 0.21 | 0.17 | 0.18 |
| chr7 | 52887629  | 52888146  | Gm16047       | ENSMUSG00000084882 | 292 | 0.37 | 0.57 | 0.32 | 0.3  | 0.44 | 0.45 |
| chr7 | 133343460 | 133344137 | Xpo6          | ENSMUSG00000000131 | 58  | 0.09 | 0.14 | 0.08 | 0.15 | 0.2  | 0.17 |

|      |           |           |               |                    |      |      |      |      |      |      |      |
|------|-----------|-----------|---------------|--------------------|------|------|------|------|------|------|------|
| chr7 | 125676583 | 125676972 | Coq7          | ENSMUSG00000030652 | 38   | 0.08 | 0.11 | 0.08 | 0.11 | 0.14 | 0.08 |
| chr7 | 71646413  | 71647452  | Apba2         | ENSMUSG00000030519 | 340  | 0.17 | 0.22 | 0.11 | 0.17 | 0.11 | 0.19 |
| chr7 | 125999090 | 125999737 | 2310008H09Rik | ENSMUSG00000030980 | -297 | 0.25 | 0.18 | 0.09 | 0.17 | 0.15 | 0.18 |
| chr7 | 53651579  | 53653681  | Kcnc1         | ENSMUSG00000058975 | 763  | 0.12 | 0.13 | 0.09 | 0.14 | 0.09 | 0.15 |
| chr7 | 105509311 | 105510022 | Tsku          | ENSMUSG00000049580 | 132  | 0.17 | 0.3  | 0.09 | 0.17 | 0.1  | 0.11 |
| chr7 | 52436897  | 52437933  | Pth2          | ENSMUSG00000038300 | 863  | 0.1  | 0.14 | 0.13 | 0.21 | 0.17 | 0.23 |
| chr7 | 54305806  | 54306392  | Tmem86a       | ENSMUSG00000010307 | 89   | 0.09 | 0.08 | 0.1  | 0.11 | 0.05 | 0.11 |
| chr7 | 144629197 | 144629786 | Glrx3         | ENSMUSG00000031068 | 160  | 0.26 | 0.21 | 0.12 | 0.15 | 0.13 | 0.2  |
| chr7 | 86804821  | 86805780  | 5730590G19Rik | ENSMUSG00000046591 | 218  | 0.24 | 0.27 | 0.1  | 0.16 | 0.12 | 0.16 |
| chr7 | 123380799 | 123381411 | Plekha7       | ENSMUSG00000045659 | 185  | 0.15 | 0.13 | 0.1  | 0.13 | 0.06 | 0.15 |
| chr7 | 34917401  | 34918488  | Wtip          | ENSMUSG00000036459 | -107 | 0.18 | 0.14 | 0.09 | 0.16 | 0.13 | 0.17 |
| chr7 | 109082264 | 109082801 | Lrrc51        | ENSMUSG00000064307 | -216 | 0.19 | 0.37 | 0.15 | 0.17 | 0.08 | 0.23 |
| chr7 | 125848838 | 125849358 | Gde1          | ENSMUSG00000033917 | -204 | 0.16 | 0.12 | 0.08 | 0.15 | 0.08 | 0.12 |
| chr7 | 135888230 | 135888771 | Sec23ip       | ENSMUSG00000055319 | 116  | 0.17 | 0.15 | 0.1  | 0.19 | 0.1  | 0.16 |
| chr7 | 52973073  | 52973688  | Sphk2         | ENSMUSG00000057342 | -108 | 0.19 | 0.26 | 0.11 | 0.17 | 0.11 | 0.18 |
| chr7 | 88092181  | 88092830  | Sec11a        | ENSMUSG00000025724 | -108 | 0.33 | 0.08 | 0.07 | 0.22 | 0.05 | 0.22 |
| chr7 | 89483825  | 89484986  | Adamts13      | ENSMUSG00000070469 | 201  | 0.11 | 0.17 | 0.08 | 0.11 | 0.23 | 0.1  |
| chr7 | 63305336  | 63305767  | Herc2         | ENSMUSG00000030451 | 26   | 0.21 | 0.25 | 0.09 | 0.14 | 0.08 | 0.14 |
| chr7 | 71536935  | 71537788  | Mphosph10     | ENSMUSG00000030521 | -239 | 0.11 | 0.11 | 0.08 | 0.15 | 0.06 | 0.15 |
| chr7 | 36000116  | 36000576  | Lrp3          | ENSMUSG00000001802 | -35  | 0.25 | 0.09 | 0.1  | 0.14 | 0.17 | 0.09 |
| chr7 | 4947426   | 4947654   | Zfp579        | ENSMUSG00000051550 | 91   | 0.2  | 0.15 | 0.1  | 0.18 | 0.12 | 0.16 |
| chr7 | 121260454 | 121261381 | Rras2         | ENSMUSG00000055723 | 378  | 0.21 | 0.19 | 0.1  | 0.17 | 0.12 | 0.15 |
| chr7 | 150734315 | 150735257 | Nap114        | ENSMUSG00000059119 | 209  | 0.32 | 0.32 | 0.18 | 0.21 | 0.19 | 0.14 |
| chr7 | 13639510  | 13640162  | Mzf1          | ENSMUSG00000030380 | 27   | 1    | 0.08 | 0.1  | 0.12 | 0.07 | 0.16 |
| chr7 | 19864513  | 19865379  | Ppm1n         | ENSMUSG00000030402 | 452  | 0.16 | 0.11 | 0.1  | 0.17 | 0.1  | 0.13 |
| chr7 | 140900369 | 140901111 | Uros          | ENSMUSG00000030979 | -99  | 0.13 | 0.16 | 0.09 | 0.13 | 0.07 | 0.16 |
| chr7 | 89004013  | 89004525  | Tm6sf1        | ENSMUSG00000038623 | 232  | 0.12 | 0.14 | 0.11 | 0.11 | 0.08 | 0.15 |
| chr7 | 26471772  | 26473309  | Tgfb1         | ENSMUSG00000002603 | 519  | 0.16 | 0.23 | 0.11 | 0.16 | 0.12 | 0.14 |
| chr7 | 138685436 | 138688243 | Hmx3          | ENSMUSG00000040148 | 458  | 0.13 | 0.12 | 0.1  | 0.16 | 0.08 | 0.15 |
| chr7 | 52765387  | 52765943  | Nucb1         | ENSMUSG00000030824 | 20   | 0.16 | 0.13 | 0.13 | 0.09 | 0.05 | 0.12 |

|      |           |           |               |                     |       |      |      |      |      |      |      |
|------|-----------|-----------|---------------|---------------------|-------|------|------|------|------|------|------|
| chr7 | 28438844  | 28439407  | Ttc9b         | ENSMUSG00000007944  | 191   | 0.22 | 0.19 | 0.15 | 0.25 | 0.15 | 0.15 |
| chr7 | 87833037  | 87833937  | Crtc3         | ENSMUSG000000030527 | 276   | 0.18 | 0.15 | 0.09 | 0.1  | 0.13 | 0.1  |
| chr7 | 133952490 | 133952898 | Gm15676       | ENSMUSG000000085583 | -72   | 1    | 0.07 | 0.13 | 0.2  | 0.07 | 0.18 |
| chr7 | 3424283   | 3424595   | Cacng6        | ENSMUSG000000078815 | -984  | 0.15 | 0.1  | 0.07 | 0.17 | 0.09 | 0.11 |
| chr7 | 3596604   | 3597565   | Cnot3         | ENSMUSG000000035632 | 192   | 0.11 | 0.07 | 0.12 | 0.18 | 0.16 | 0.12 |
| chr7 | 25861843  | 25862753  | Zfp574        | ENSMUSG000000045252 | 33    | 0.15 | 0.32 | 0.09 | 0.19 | 0.1  | 0.15 |
| chr7 | 36587595  | 36588068  | E130304I02Rik | ENSMUSG000000044997 | 219   | 0.36 | 0.3  | 0.09 | 0.14 | 0.22 | 0.12 |
| chr7 | 134889994 | 134890645 | Fbxl19        | ENSMUSG000000030811 | 30    | 0.38 | 0.1  | 0.17 | 0.2  | 0.26 | 0.16 |
| chr7 | 4971830   | 4972341   | Zfp865        | ENSMUSG000000074405 | 107   | 0.15 | 0.1  | 0.11 | 0.21 | 0.25 | 0.18 |
| chr7 | 5004394   | 5004927   | Zfp580        | ENSMUSG000000055633 | 1526  | 0.6  | 0.4  | 0.11 | 0.25 | 0.21 | 0.19 |
| chr7 | 30094318  | 30094631  | Dpf1          | ENSMUSG000000030584 | -58   | 0.06 | 0.04 | 0.19 | 0.24 | 0.15 | 0.2  |
| chr7 | 117008937 | 117009185 | Scube2        | ENSMUSG00000007279  | 39    | 0.15 | 0.12 | 0.08 | 0.16 | 0.06 | 0.19 |
| chr7 | 138079558 | 138080563 | Htra1         | ENSMUSG00000006205  | 435   | 0.2  | 0.19 | 0.13 | 0.14 | 0.08 | 0.13 |
| chr7 | 147080660 | 147080975 | Kndc1         | ENSMUSG000000066129 | 79    | 0.15 | 0.2  | 0.08 | 0.13 | 0.22 | 0.11 |
| chr7 | 152127071 | 152127708 | Ccnd1         | ENSMUSG000000070348 | -1615 | 0.06 | 0.05 | 0.13 | 0.22 | 0.19 | 0.08 |
| chr7 | 19856689  | 19857330  | Vasp          | ENSMUSG000000030403 | 157   | 0.33 | 0.21 | 0.12 | 0.1  | 0.17 | 0.17 |
| chr7 | 52970346  | 52970740  | Sphk2         | ENSMUSG000000057342 | 34    | 0.24 | 0.4  | 0.14 | 0.21 | 0.08 | 0.14 |
| chr7 | 54101021  | 54101741  | Ldha          | ENSMUSG000000063229 | 172   | 0.42 | 0.75 | 0.15 | 0.27 | 0.19 | 0.19 |
| chr7 | 56890838  | 56891109  | Dbx1          | ENSMUSG000000030507 | 1246  | 0.5  | 0.14 | 0.44 | 0.73 | 0.2  | 0.41 |
| chr7 | 69564562  | 69564895  | Mkrn3         | ENSMUSG000000070527 | 311   | 0.15 | 0.12 | 0.13 | 0.17 | 0.22 | 0.31 |
| chr7 | 71082244  | 71084414  | Klf13         | ENSMUSG000000052040 | 472   | 0.11 | 0.2  | 0.1  | 0.15 | 0.16 | 0.16 |
| chr7 | 108985061 | 108985610 | Gm10602       | ENSMUSG000000073985 | 70    | 0.18 | 0.24 | 0.1  | 0.19 | 0.06 | 0.11 |
| chr7 | 129302842 | 129303306 | Gm15489       | ENSMUSG000000086942 | -159  | 0.47 | 0.32 | 0.08 | 0.21 | 0.25 | 0.14 |
| chr7 | 140050878 | 140051324 | Fam175b       | ENSMUSG000000030965 | 193   | 0.14 | 0.13 | 0.1  | 0.11 | 0.08 | 0.12 |
| chr7 | 20214265  | 20215013  | Relb          | ENSMUSG000000002983 | -42   | 0.07 | 0.12 | 0.11 | 0.16 | 0.11 | 0.13 |
| chr7 | 150254975 | 150255500 | Tssc4         | ENSMUSG000000045752 | 83    | 0.56 | 0.42 | 0.17 | 0.17 | 0.2  | 0.13 |
| chr7 | 51803869  | 51804387  | Pold1         | ENSMUSG000000038644 | -25   | 0.24 | 0.11 | 0.08 | 0.16 | 0.12 | 0.1  |
| chr7 | 149557946 | 149558353 | 6330512M04Rik | ENSMUSG000000045777 | 15    | 0.06 | 0.09 | 0.12 | 0.2  | 0.27 | 0.13 |
| chr7 | 29965281  | 29965716  | Psmc8         | ENSMUSG000000030591 | 194   | 0.26 | 0.14 | 0.08 | 0.19 | 0.13 | 0.09 |
| chr7 | 38803913  | 38804731  | C80913        | ENSMUSG000000030421 | 249   | 0.19 | 0.09 | 0.12 | 0.15 | 0.12 | 0.1  |

|      |           |           |         |                    |      |      |      |      |      |      |      |
|------|-----------|-----------|---------|--------------------|------|------|------|------|------|------|------|
| chr7 | 105987324 | 105987884 | Wnt11   | ENSMUSG00000015957 | 249  | 0.08 | 0.07 | 0.1  | 0.08 | 0.14 | 0.1  |
| chr7 | 128535693 | 128536710 | Hs3st2  | ENSMUSG00000046321 | 391  | 0.13 | 0.11 | 0.09 | 0.13 | 0.09 | 0.13 |
| chr7 | 130267283 | 130268124 | Tnrc6a  | ENSMUSG00000052707 | -67  | 0.21 | 0.13 | 0.12 | 0.07 | 0.11 | 0.08 |
| chr7 | 135561225 | 135562288 | Rgs10   | ENSMUSG00000030844 | -79  | 0.13 | 0.2  | 0.09 | 0.13 | 0.09 | 0.16 |
| chr7 | 150153356 | 150155362 | Ascl2   | ENSMUSG00000009248 | 810  | 0.3  | 0.27 | 0.11 | 0.23 | 0.19 | 0.19 |
| chr7 | 19577182  | 19577964  | Gm10676 | ENSMUSG00000074355 | 550  | 0.19 | 0.17 | 0.12 | 0.14 | 0.14 | 0.11 |
| chr7 | 29746929  | 29747497  | Actn4   | ENSMUSG00000054808 | 29   | 0.11 | 0.2  | 0.13 | 0.17 | 0.06 | 0.14 |
| chr7 | 80885123  | 80885898  | Fam174b | ENSMUSG00000078670 | 317  | 0.25 | 0.13 | 0.1  | 0.09 | 0.07 | 0.14 |
| chr7 | 82993078  | 82993592  | Klhl25  | ENSMUSG00000055652 | 111  | 0.18 | 0.17 | 0.17 | 0.15 | 0.28 | 0.12 |
| chr7 | 104480365 | 104481083 | Usp35   | ENSMUSG00000035713 | -194 | 0.39 | 0.38 | 0.16 | 0.23 | 0.27 | 0.21 |
| chr7 | 126863742 | 126864388 | Thumpd1 | ENSMUSG00000030942 | 214  | 0.2  | 0.12 | 0.09 | 0.11 | 0.12 | 0.1  |
| chr7 | 146132052 | 146133012 | Jakmip3 | ENSMUSG00000056856 | 119  | 0.08 | 0.12 | 0.13 | 0.18 | 0.13 | 0.16 |
| chr7 | 17199686  | 17200958  | Grff1   | ENSMUSG00000058230 | -36  | 0.18 | 0.22 | 0.14 | 0.12 | 0.27 | 0.13 |
| chr7 | 36369504  | 36370589  | Rgs9bp  | ENSMUSG00000056043 | 555  | 0.15 | 0.11 | 0.1  | 0.12 | 0.09 | 0.14 |
| chr7 | 105457476 | 105458188 | Acer3   | ENSMUSG00000030760 | 184  | 0.09 | 0.14 | 0.13 | 0.12 | 0.06 | 0.13 |
| chr7 | 107128252 | 107129013 | Rnf169  | ENSMUSG00000058761 | 336  | 0.1  | 0.18 | 0.07 | 0.12 | 0.15 | 0.17 |
| chr7 | 123586551 | 123587575 | Pik3c2a | ENSMUSG00000030660 | -91  | 0.41 | 0.15 | 0.13 | 0.14 | 0.22 | 0.14 |
| chr7 | 134072158 | 134072834 | Kctd13  | ENSMUSG00000030685 | 103  | 0.23 | 0.15 | 0.12 | 0.12 | 0.13 | 0.21 |
| chr7 | 26180294  | 26181165  | Lipe    | ENSMUSG00000003123 | 277  | 0.24 | 0.1  | 0.13 | 0.12 | 0.1  | 0.1  |
| chr7 | 31250488  | 31250698  | Nphs1as | ENSMUSG00000087009 | 17   | 0.15 | 0.19 | 0.13 | 0.22 | 0.09 | 0.16 |
| chr7 | 20300260  | 20301347  | Gm20512 | ENSMUSG00000092381 | 438  | 0.17 | 0.13 | 0.14 | 0.13 | 0.07 | 0.12 |
| chr7 | 29079412  | 29079971  | Dll3    | ENSMUSG00000003436 | -191 | 0.23 | 0.36 | 0.13 | 0.12 | 0.19 | 0.15 |
| chr7 | 29382831  | 29383454  | Pak4    | ENSMUSG00000030602 | -37  | 0.31 | 0.2  | 0.1  | 0.16 | 0.12 | 0.18 |
| chr7 | 65913478  | 65914244  | Atp10a  | ENSMUSG00000025324 | 289  | 0.11 | 0.06 | 0.09 | 0.12 | 0.07 | 0.15 |
| chr7 | 108256584 | 108257751 | Fchs2   | ENSMUSG00000030691 | -122 | 0.13 | 0.1  | 0.09 | 0.13 | 0.1  | 0.15 |
| chr7 | 112959182 | 112959851 | Mrpl17  | ENSMUSG00000030879 | -44  | 0.14 | 0.15 | 0.09 | 0.14 | 0.07 | 0.12 |
| chr7 | 13619771  | 13620209  | Chmp2a  | ENSMUSG00000033916 | 136  | 0.27 | 0.25 | 0.11 | 0.17 | 0.15 | 0.18 |
| chr7 | 31410965  | 31411263  | Cox6b1  | ENSMUSG00000036751 | 56   | 0.33 | 0.42 | 0.13 | 0.2  | 0.58 | 0.21 |
| chr7 | 85991859  | 85992224  | Det1    | ENSMUSG00000030610 | 81   | 0.16 | 0.21 | 0.15 | 0.14 | 0.11 | 0.12 |
| chr7 | 35173785  | 35175003  | Lsm14a  | ENSMUSG00000066568 | -295 | 0.22 | 0.14 | 0.15 | 0.24 | 0.17 | 0.18 |

|      |           |           |               |                    |       |      |      |      |      |      |      |
|------|-----------|-----------|---------------|--------------------|-------|------|------|------|------|------|------|
| chr7 | 75095589  | 75098268  | Igf1r         | ENSMUSG00000005533 | -785  | 0.12 | 0.1  | 0.07 | 0.1  | 0.1  | 0.12 |
| chr7 | 20162548  | 20163019  | Zfp296        | ENSMUSG00000011267 | 147   | 1    | 0.38 | 0.18 | 0.2  | 0.1  | 0.13 |
| chr7 | 38554519  | 38557370  | Zfp536        | ENSMUSG00000043456 | -1301 | 0.23 | 0.17 | 0.11 | 0.2  | 0.17 | 0.14 |
| chr7 | 73984788  | 73985516  | Adamts17      | ENSMUSG00000058145 | 453   | 0.11 | 0.13 | 0.09 | 0.12 | 0.07 | 0.14 |
| chr7 | 74903684  | 74904773  | Sym           | ENSMUSG00000030554 | 342   | 0.09 | 0.17 | 0.07 | 0.11 | 0.05 | 0.14 |
| chr7 | 86644226  | 86644480  | AI854517      | ENSMUSG00000085554 | -650  | 0.14 | 0.3  | 0.17 | 0.37 | 0.4  | 0.15 |
| chr7 | 88357969  | 88359217  | Pde8a         | ENSMUSG00000025584 | 111   | 0.11 | 0.17 | 0.11 | 0.15 | 0.13 | 0.13 |
| chr7 | 88907346  | 88908417  | Fam103a1      | ENSMUSG00000038646 | 70    | 0.17 | 0.17 | 0.11 | 0.17 | 0.11 | 0.15 |
| chr7 | 16760670  | 16760937  | Meis3         | ENSMUSG00000041420 | 74    | 0.24 | 0.11 | 0.08 | 0.1  | 0.11 | 0.14 |
| chr7 | 13513441  | 13514038  | 2310014L17Rik | ENSMUSG00000033967 | 974   | 0.15 | 0.12 | 0.1  | 0.15 | 0.12 | 0.17 |
| chr7 | 16899017  | 16899441  | Bbc3          | ENSMUSG00000002083 | 363   | 0.11 | 0.12 | 0.15 | 0.34 | 0.32 | 0.12 |
| chr7 | 25790434  | 25791035  | Atp1a3        | ENSMUSG00000040907 | 180   | 0.15 | 0.09 | 0.12 | 0.11 | 0.07 | 0.18 |
| chr7 | 36322422  | 36322808  | Tdrd12        | ENSMUSG00000030491 | 67    | 0.83 | 0.89 | 0.8  | 0.66 | 0.96 | 0.84 |
| chr7 | 38891973  | 38893083  | Ccne1         | ENSMUSG00000002068 | -7    | 0.17 | 0.15 | 0.11 | 0.14 | 0.13 | 0.12 |
| chr7 | 72838199  | 72838653  | Tm2d3         | ENSMUSG00000078681 | 123   | 0.12 | 0.27 | 0.09 | 0.13 | 0.18 | 0.13 |
| chr7 | 141416333 | 141417090 | Adam12        | ENSMUSG00000054555 | 69    | 0.29 | 0.46 | 0.18 | 0.27 | 0.17 | 0.19 |
| chr7 | 4658861   | 4659076   | Brsk1         | ENSMUSG00000035390 | -1612 | 0.79 | 0.74 | 0.47 | 0.57 | 0.7  | 0.53 |
| chr7 | 24919136  | 24919385  | Zfp235        | ENSMUSG00000047603 | 67    | 0.39 | 1    | 0.14 | 1    | 0.75 | 0.24 |
| chr7 | 38354407  | 38354636  | Zfp536        | ENSMUSG00000043456 | -1112 | 0.88 | 0.94 | 0.84 | 0.82 | 0.78 | 0.97 |
| chr7 | 52308008  | 52309534  | Prr12         | ENSMUSG00000046574 | -520  | 0.16 | 0.92 | 0.14 | 0.2  | 0.23 | 0.14 |
| chr7 | 52962021  | 52962430  | Dbp           | ENSMUSG00000059824 | -249  | 0.4  | 0.61 | 0.13 | 0.12 | 0.55 | 0.14 |
| chr7 | 86955896  | 86956310  | Mesp2         | ENSMUSG00000030543 | 490   | 0.11 | 0.12 | 0.23 | 0.18 | 0.24 | 0.28 |
| chr7 | 112766260 | 112766462 | Trim3         | ENSMUSG00000036989 | 179   | 0.93 | 0.97 | 0.78 | 0.77 | 0.89 | 0.86 |
| chr7 | 147019931 | 147020141 | Gpr123        | ENSMUSG00000025475 | -37   | 1    | 0.89 | 0.28 | 0.19 | 0.2  | 0.32 |
| chr7 | 66483969  | 66484988  | Ube3a         | ENSMUSG00000025326 | 356   | 0.18 | 0.29 | 0.14 | 0.26 | 0.25 | 0.14 |
| chr7 | 88973581  | 88974607  | Btbd1         | ENSMUSG00000025103 | 223   | 0.14 | 0.12 | 0.09 | 0.14 | 0.1  | 0.12 |
| chr7 | 148414300 | 148415005 | Phrf1         | ENSMUSG00000038611 | -31   | 0.16 | 0.17 | 0.1  | 0.16 | 0.13 | 0.13 |
| chr7 | 19678318  | 19678566  | Dmpk          | ENSMUSG00000030409 | 797   | 0.3  | 0.38 | 0.12 | 0.38 | 0.15 | 0.24 |
| chr7 | 26033959  | 26035937  | Erf           | ENSMUSG00000040857 | 801   | 0.19 | 0.16 | 0.13 | 0.19 | 0.16 | 0.14 |
| chr7 | 86040603  | 86041107  | Aen           | ENSMUSG00000030609 | 115   | 0.2  | 0.36 | 0.12 | 0.17 | 0.28 | 0.14 |

|      |           |           |          |                     |       |      |      |      |      |      |      |
|------|-----------|-----------|----------|---------------------|-------|------|------|------|------|------|------|
| chr7 | 108496480 | 108496703 | Arap1    | ENSMUSG000000032812 | 10    | 0.05 | 0.1  | 0.07 | 0.14 | 0.06 | 0.1  |
| chr7 | 53040986  | 53041268  | Lmtk3    | ENSMUSG000000062044 | 247   | 0.18 | 0.2  | 0.07 | 0.16 | 0.12 | 0.11 |
| chr7 | 74789977  | 74790702  | Lrrc28   | ENSMUSG000000030556 | -222  | 0.29 | 0.47 | 0.17 | 0.19 | 0.39 | 0.2  |
| chr7 | 133618261 | 133619082 | Sh2b1    | ENSMUSG000000030733 | -27   | 0.56 | 0.44 | 0.1  | 0.17 | 0.33 | 0.11 |
| chr7 | 29096814  | 29097297  | Timm50   | ENSMUSG000000003438 | -97   | 0.17 | 0.07 | 0.07 | 0.1  | 0.09 | 0.14 |
| chr7 | 4795628   | 4796444   | Shisa7   | ENSMUSG000000053550 | 262   | 0.18 | 0.08 | 0.15 | 0.15 | 0.11 | 0.18 |
| chr7 | 7250775   | 7252481   | Cicn4-2  | ENSMUSG000000000605 | -157  | 0.16 | 0.26 | 0.1  | 0.13 | 0.1  | 0.17 |
| chr7 | 20394812  | 20395074  | Gm16175  | ENSMUSG000000087206 | -15   | 1    | 0.15 | 0.28 | 0.22 | 0.14 | 0.3  |
| chr7 | 29956141  | 29956867  | Ggn      | ENSMUSG000000031493 | 288   | 0.32 | 0.17 | 0.24 | 1    | 0.5  | 0.22 |
| chr7 | 52960160  | 52960524  | Dbp      | ENSMUSG000000059824 | -116  | 0.17 | 0.12 | 0.07 | 0.25 | 0.47 | 0.18 |
| chr7 | 133416110 | 133416772 | Sbk1     | ENSMUSG000000042978 | 308   | 0.23 | 0.39 | 0.09 | 0.16 | 0.32 | 0.16 |
| chr7 | 135110621 | 135111813 | Fus      | ENSMUSG000000030795 | 246   | 0.21 | 0.18 | 0.13 | 0.15 | 0.15 | 0.18 |
| chr7 | 52103818  | 52104044  | Tbc1d17  | ENSMUSG000000038520 | 33    | 0.33 | 0.23 | 0.23 | 0.24 | 0.52 | 0.15 |
| chr7 | 106774031 | 106775579 | Gm4980   | ENSMUSG000000060814 | -121  | 0.16 | 0.29 | 0.12 | 0.24 | 0.22 | 0.16 |
| chr7 | 108450252 | 108450668 | Atg16l2  | ENSMUSG000000047767 | 81    | 0.04 | 0.19 | 0.11 | 0.18 | 0.14 | 0.18 |
| chr7 | 126937284 | 126937855 | Eri2     | ENSMUSG000000030929 | -96   | 0.3  | 0.61 | 0.11 | 0.27 | 0.21 | 0.15 |
| chr7 | 147233665 | 147235220 | Msx3     | ENSMUSG000000025469 | 545   | 0.15 | 0.16 | 0.15 | 0.2  | 0.11 | 0.15 |
| chr7 | 149135988 | 149136586 | Brsk2    | ENSMUSG000000053046 | 299   | 0.12 | 0.11 | 0.11 | 0.14 | 0.1  | 0.1  |
| chr7 | 52496033  | 52496592  | Cd37     | ENSMUSG000000030798 | -1827 | 0.27 | 0.24 | 0.27 | 0.39 | 0.18 | 0.26 |
| chr7 | 86418051  | 86418355  | Abhd2    | ENSMUSG000000039202 | 116   | 0.12 | 0.27 | 0.13 | 0.21 | 0.08 | 0.13 |
| chr7 | 148747848 | 148748532 | Ap2a2    | ENSMUSG00000002957  | 111   | 0.33 | 0.17 | 0.14 | 0.24 | 0.16 | 0.18 |
| chr7 | 4787890   | 4788445   | Shisa7   | ENSMUSG000000053550 | 158   | 0.1  | 0.06 | 0.09 | 0.12 | 0.07 | 0.08 |
| chr7 | 26053231  | 26053573  | Cic      | ENSMUSG00000005442  | -4    | 0.23 | 0.33 | 0.16 | 0.22 | 0.67 | 0.14 |
| chr7 | 26444119  | 26444500  | Exosc5   | ENSMUSG000000061286 | 137   | 0.27 | 0.09 | 0.12 | 0.16 | 0.16 | 0.14 |
| chr7 | 27963640  | 27964178  | Rab4b    | ENSMUSG000000053291 | -80   | 0.24 | 0.14 | 0.08 | 0.19 | 0.06 | 0.08 |
| chr7 | 29062637  | 29063250  | Eid2b    | ENSMUSG000000070705 | 218   | 0.14 | 0.16 | 0.12 | 0.13 | 0.24 | 0.15 |
| chr7 | 129432375 | 129433394 | Prkcb    | ENSMUSG000000052889 | 73    | 0.12 | 0.2  | 0.12 | 0.13 | 0.08 | 0.12 |
| chr7 | 152047153 | 152047943 | Fgf4     | ENSMUSG000000050917 | 257   | 0.14 | 0.14 | 0.15 | 0.15 | 0.18 | 0.15 |
| chr7 | 97624449  | 97624918  | Tmem126b | ENSMUSG000000030614 | -178  | 0.23 | 0.15 | 0.1  | 0.13 | 0.11 | 0.1  |
| chr7 | 117204434 | 117205777 | AA474408 | ENSMUSG000000073867 | -266  | 0.06 | 0.12 | 0.1  | 0.11 | 0.08 | 0.15 |

|      |           |           |         |                    |       |      |      |      |      |      |      |
|------|-----------|-----------|---------|--------------------|-------|------|------|------|------|------|------|
| chr7 | 28458603  | 28459659  | Map3k10 | ENSMUSG00000040390 | 245   | 0.14 | 0.19 | 0.11 | 0.14 | 0.18 | 0.18 |
| chr7 | 109415716 | 109416847 | Stim1   | ENSMUSG00000030987 | -57   | 0.08 | 0.36 | 0.11 | 0.16 | 0.11 | 0.16 |
| chr7 | 4744327   | 4745251   | Rpl28   | ENSMUSG00000030432 | 313   | 0.33 | 0.21 | 0.13 | 0.15 | 0.11 | 0.21 |
| chr7 | 26101661  | 26102123  | Megf8   | ENSMUSG00000045039 | -291  | 0.33 | 0.25 | 0.24 | 0.23 | 0.09 | 0.15 |
| chr7 | 30088902  | 30090193  | Dpf1    | ENSMUSG00000030584 | 577   | 0.29 | 0.17 | 0.12 | 0.14 | 0.24 | 0.16 |
| chr7 | 52184539  | 52185474  | Ap2a1   | ENSMUSG00000060279 | -210  | 0.15 | 0.14 | 0.11 | 0.16 | 0.1  | 0.15 |
| chr7 | 73253883  | 73255224  | Chsy1   | ENSMUSG00000032640 | 152   | 0.11 | 0.16 | 0.09 | 0.13 | 0.1  | 0.1  |
| chr7 | 117757693 | 117758645 | Sbf2    | ENSMUSG00000038371 | 106   | 0.14 | 0.19 | 0.1  | 0.14 | 0.11 | 0.13 |
| chr7 | 149088025 | 149088504 | Tollip  | ENSMUSG00000025139 | 56    | 0.23 | 0.1  | 0.08 | 0.21 | 0.11 | 0.11 |
| chr7 | 88716124  | 88716869  | Whamm   | ENSMUSG00000045795 | 318   | 0.17 | 0.16 | 0.12 | 0.18 | 0.13 | 0.2  |
| chr7 | 148479641 | 148480084 | Drd4    | ENSMUSG00000025496 | 1933  | 1    | 0.14 | 0.14 | 0.22 | 0.13 | 0.19 |
| chr7 | 25292022  | 25292815  | Zfp428  | ENSMUSG00000064264 | 393   | 0.12 | 0.06 | 0.19 | 0.22 | 0.09 | 0.11 |
| chr7 | 27980731  | 27981206  | Snrpa   | ENSMUSG00000061479 | -189  | 0.12 | 0.19 | 0.09 | 0.14 | 0.07 | 0.1  |
| chr7 | 29220810  | 29221012  | Gmfg    | ENSMUSG00000060791 | -1555 | 0.12 | 0.21 | 0.13 | 0.1  | 0.08 | 0.14 |
| chr7 | 52960824  | 52961074  | Dbp     | ENSMUSG00000059824 | -45   | 0.18 | 0.13 | 0.19 | 0.21 | 0.08 | 0.13 |
| chr7 | 57167200  | 57167693  | Slc6a5  | ENSMUSG00000039728 | 376   | 0.21 | 0.14 | 0.12 | 0.14 | 0.16 | 0.14 |
| chr7 | 7253339   | 7253614   | Cicn4-2 | ENSMUSG0000000605  | -1254 | 0.1  | 0.1  | 0.06 | 0.27 | 0.04 | 0.15 |
| chr7 | 16984942  | 16986817  | Zc3h4   | ENSMUSG00000059273 | -351  | 0.21 | 0.19 | 0.12 | 0.18 | 0.25 | 0.17 |
| chr7 | 30066356  | 30067247  | Spint2  | ENSMUSG00000074227 | 195   | 0.13 | 0.16 | 0.08 | 0.1  | 0.1  | 0.1  |
| chr7 | 87171870  | 87172457  | Zfp710  | ENSMUSG00000048897 | 1049  | 0.12 | 0.38 | 0.19 | 0.21 | 0.16 | 0.18 |
| chr7 | 108011370 | 108012069 | Relt    | ENSMUSG00000008318 | -47   | 0.14 | 0.32 | 0.08 | 0.12 | 0.11 | 0.12 |
| chr7 | 16972908  | 16973414  | Sae1    | ENSMUSG00000052833 | -28   | 0.15 | 0.11 | 0.11 | 0.18 | 0.1  | 0.16 |
| chr7 | 119822400 | 119823605 | Tead1   | ENSMUSG00000055320 | 170   | 0.29 | 0.25 | 0.14 | 0.18 | 0.22 | 0.2  |
| chr7 | 132695579 | 132696057 | Il4ra   | ENSMUSG00000030748 | 33    | 1    | 0.29 | 0.13 | 0.13 | 0.19 | 0.16 |
| chr7 | 133792789 | 133793162 | Ccdc101 | ENSMUSG00000030714 | 152   | 0.43 | 0.25 | 0.16 | 0.12 | 0.23 | 0.2  |
| chr7 | 135604516 | 135605636 | Tial1   | ENSMUSG00000030846 | -353  | 0.18 | 0.19 | 0.12 | 0.2  | 0.15 | 0.17 |
| chr7 | 52241330  | 52242167  | Prmt1   | ENSMUSG00000052429 | -39   | 0.08 | 0.14 | 0.11 | 0.16 | 0.14 | 0.14 |
| chr7 | 136735351 | 136735683 | Wdr11   | ENSMUSG00000042055 | 140   | 0.08 | 0.09 | 0.1  | 0.11 | 0.05 | 0.15 |
| chr7 | 30906692  | 30907283  | Zfp382  | ENSMUSG00000074220 | 26    | 0.08 | 0.09 | 0.17 | 0.21 | 0.06 | 0.27 |
| chr7 | 91754238  | 91754812  | Fah     | ENSMUSG00000030630 | -286  | 0.23 | 0.08 | 0.11 | 0.21 | 0.15 | 0.14 |

|      |           |           |               |                    |      |      |      |      |      |      |      |
|------|-----------|-----------|---------------|--------------------|------|------|------|------|------|------|------|
| chr7 | 97605502  | 97605951  | Tmem126a      | ENSMUSG00000030615 | -8   | 0.15 | 0.36 | 0.09 | 0.14 | 0.08 | 0.09 |
| chr7 | 35596726  | 35598008  | Chst8         | ENSMUSG00000060402 | 338  | 0.2  | 0.13 | 0.09 | 0.17 | 0.13 | 0.17 |
| chr7 | 133572134 | 133572914 | Rabep2        | ENSMUSG00000030727 | 251  | 0.11 | 0.14 | 0.1  | 0.06 | 0.07 | 0.13 |
| chr7 | 147973533 | 147973828 | Syce1         | ENSMUSG00000025480 | 73   | 0.94 | 0.93 | 0.86 | 0.77 | 0.88 | 0.93 |
| chr7 | 24867082  | 24867331  | Zfp180        | ENSMUSG00000057101 | 263  | 0.44 | 0.34 | 0.37 | 0.42 | 0.48 | 0.43 |
| chr7 | 51684205  | 51684805  | Lrrc4b        | ENSMUSG00000047085 | 117  | 0.28 | 0.29 | 0.07 | 0.14 | 0.22 | 0.17 |
| chr7 | 141862171 | 141862967 | Dock1         | ENSMUSG00000058325 | 199  | 0.15 | 0.17 | 0.15 | 0.1  | 0.12 | 0.19 |
| chr7 | 4966857   | 4967443   | Zfp524        | ENSMUSG00000051184 | 47   | 0.2  | 0.22 | 0.11 | 0.22 | 0.12 | 0.16 |
| chr7 | 36103183  | 36103465  | Gpatch1       | ENSMUSG00000063808 | 116  | 0.1  | 0.2  | 0.12 | 0.21 | 0.04 | 0.06 |
| chr7 | 52124273  | 52125160  | Ptov1         | ENSMUSG00000038502 | -289 | 0.12 | 0.16 | 0.11 | 0.13 | 0.14 | 0.18 |
| chr7 | 52409419  | 52410030  | Pih1d1        | ENSMUSG00000003423 | 51   | 0.2  | 0.09 | 0.09 | 0.13 | 0.14 | 0.13 |
| chr7 | 31935485  | 31936070  | Gramd1a       | ENSMUSG00000001248 | 292  | 0.11 | 0.31 | 0.11 | 0.17 | 0.17 | 0.12 |
| chr7 | 38558523  | 38558727  | Zfp536        | ENSMUSG00000043456 | -44  | 0.14 | 0.06 | 0.06 | 0.14 | 0.07 | 0.1  |
| chr7 | 52721937  | 52722349  | Bax           | ENSMUSG00000003873 | 2    | 0.12 | 0.06 | 0.08 | 0.13 | 0.09 | 0.12 |
| chr7 | 71518684  | 71519010  | Fan1          | ENSMUSG00000033458 | 134  | 0.4  | NA   | 0.18 | 0.3  | 0.14 | 0.29 |
| chr7 | 88049706  | 88050073  | Nmb           | ENSMUSG00000025723 | 57   | 0.14 | 0.25 | 0.15 | 0.23 | 0.1  | 0.18 |
| chr7 | 91677369  | 91677777  | Gm2115        | ENSMUSG00000085128 | 88   | 0.16 | 0.18 | 0.23 | 0.23 | 0.26 | 0.19 |
| chr7 | 112935821 | 112936366 | Dchs1         | ENSMUSG00000036862 | -29  | 0.05 | 0.07 | 0.08 | 0.09 | 0.07 | 0.11 |
| chr7 | 116924781 | 116925465 | Nrip3         | ENSMUSG00000034825 | -64  | 0.14 | 0.39 | 0.1  | 0.2  | 0.2  | 0.15 |
| chr7 | 142129202 | 142129996 | Fam196a       | ENSMUSG00000073805 | 294  | 0.06 | 0.07 | 0.08 | 0.13 | 0.08 | 0.1  |
| chr7 | 25101648  | 25101876  | Zfp94         | ENSMUSG00000074282 | -77  | 0.2  | 0.15 | 0.16 | 0.17 | 0.08 | 0.18 |
| chr7 | 26404147  | 26404654  | Atp5sl        | ENSMUSG00000057229 | -33  | 0.12 | 0.08 | 0.11 | 0.19 | 0.05 | 0.14 |
| chr7 | 28140834  | 28141163  | Shkbp1        | ENSMUSG00000089832 | -57  | 0.14 | 0.06 | 0.14 | 0.22 | 0.07 | 0.15 |
| chr7 | 138697404 | 138699598 | Hmx2          | ENSMUSG00000050100 | 925  | 0.23 | 0.18 | 0.13 | 0.21 | 0.2  | 0.15 |
| chr7 | 150687552 | 150688868 | Phlda2        | ENSMUSG00000010760 | 236  | 0.12 | 0.12 | 0.09 | 0.17 | 0.07 | 0.11 |
| chr7 | 5003097   | 5003441   | Zfp580        | ENSMUSG00000055633 | 135  | 0.06 | 0.09 | 0.1  | 0.16 | 0.15 | 0.16 |
| chr7 | 31206651  | 31207445  | Nfkbid        | ENSMUSG00000036931 | 297  | 0.25 | 0.16 | 0.15 | 0.16 | 0.18 | 0.15 |
| chr7 | 100022518 | 100023237 | 4632434I11Rik | ENSMUSG00000030641 | -137 | 0.25 | 0.21 | 0.15 | 0.2  | 0.39 | 0.23 |
| chr7 | 148041977 | 148042724 | Bet1l         | ENSMUSG00000025484 | -68  | 0.5  | 0.54 | 0.12 | 0.18 | 0.1  | 0.1  |
| chr7 | 31065034  | 31065475  | Thap8         | ENSMUSG00000013928 | 141  | 0.17 | 0.09 | 0.11 | 0.17 | 0.15 | 0.12 |



|      |           |           |               |                     |      |      |      |      |      |      |      |
|------|-----------|-----------|---------------|---------------------|------|------|------|------|------|------|------|
| chr7 | 52112604  | 52112933  | Pnkp          | ENSMUSG00000002963  | 59   | 0.16 | 0.22 | 0.1  | 0.21 | 0.25 | 0.18 |
| chr7 | 133942355 | 133943311 | Aldoa         | ENSMUSG000000030695 | -178 | 0.13 | 0.18 | 0.09 | 0.11 | 0.08 | 0.14 |
| chr7 | 152100851 | 152101356 | Oraov1        | ENSMUSG000000031072 | 98   | 0.25 | 0.07 | 0.08 | 0.18 | 0.1  | 0.08 |
| chr7 | 26412367  | 26412706  | B3gnt8        | ENSMUSG000000059479 | -107 | 0.17 | 0.25 | 0.21 | 0.27 | 0.43 | 0.35 |
| chr7 | 26474192  | 26474570  | Tgfb1         | ENSMUSG00000002603  | 435  | 0.22 | 0.05 | 0.08 | 0.2  | 0.15 | 0.15 |
| chr7 | 52109865  | 52110343  | Akt1s1        | ENSMUSG000000011096 | 1814 | 0.32 | 0.28 | 0.58 | 0.82 | 0.25 | 0.44 |
| chr7 | 104936784 | 104937875 | Pak1          | ENSMUSG000000030774 | 278  | 0.2  | 0.15 | 0.11 | 0.15 | 0.17 | 0.14 |
| chr7 | 108599381 | 108599971 | Pde2a         | ENSMUSG000000030653 | 642  | 0.21 | 0.09 | 0.09 | 0.11 | 0.13 | 0.12 |
| chr7 | 138703699 | 138704239 | Bub3          | ENSMUSG000000066979 | 64   | 0.13 | 0.07 | 0.12 | 0.19 | 0.11 | 0.13 |
| chr7 | 149246375 | 149247052 | Mob2          | ENSMUSG000000025147 | 45   | 0.16 | 0.23 | 0.1  | 0.14 | 0.1  | 0.13 |
| chr7 | 39056133  | 39056433  | Pop4          | ENSMUSG000000030423 | 84   | 0.18 | 0.06 | 0.14 | 0.18 | 0.1  | 0.14 |
| chr7 | 88137907  | 88139073  | Zfp592        | ENSMUSG000000005621 | -77  | 0.08 | 0.15 | 0.1  | 0.13 | 0.09 | 0.12 |
| chr7 | 96552618  | 96553461  | Tmem135       | ENSMUSG000000039428 | -307 | 0.16 | 0.3  | 0.12 | 0.16 | 0.24 | 0.15 |
| chr7 | 134488645 | 134489859 | Zfp768        | ENSMUSG000000047371 | -424 | 0.15 | 0.18 | 0.14 | 0.11 | 0.13 | 0.15 |
| chr7 | 137690322 | 137690943 | Nsmce4a       | ENSMUSG000000040331 | 263  | 0.11 | 0.13 | 0.08 | 0.1  | 0.08 | 0.11 |
| chr7 | 53894978  | 53895248  | Sergef        | ENSMUSG000000030839 | -112 | 0.18 | 0.08 | 0.08 | 0.11 | 0.09 | 0.16 |
| chr7 | 59116827  | 59117757  | Gas2          | ENSMUSG000000030498 | -93  | 0.12 | 0.09 | 0.11 | 0.1  | 0.08 | 0.14 |
| chr7 | 72300515  | 72301296  | Fam189a1      | ENSMUSG000000030518 | 397  | 0.12 | 0.15 | 0.11 | 0.13 | 0.11 | 0.11 |
| chr7 | 105804315 | 105805450 | 2210018M11Rik | ENSMUSG000000035401 | 197  | 0.28 | 0.35 | 0.11 | 0.16 | 0.34 | 0.12 |
| chr7 | 17401507  | 17402042  | Strn4         | ENSMUSG000000030374 | 108  | 0.17 | 0.16 | 0.11 | 0.26 | 0.22 | 0.2  |
| chr7 | 34981269  | 34981754  | Pdcd2l        | ENSMUSG000000002635 | 116  | 0.08 | 0.1  | 0.13 | 0.1  | 0.05 | 0.18 |
| chr7 | 52147434  | 52148118  | Med25         | ENSMUSG000000002968 | 3    | 0.17 | 0.17 | 0.06 | 0.08 | 0.14 | 0.11 |
| chr7 | 100228334 | 100229710 | Fam181b       | ENSMUSG000000051515 | 633  | 0.1  | 0.09 | 0.1  | 0.13 | 0.08 | 0.13 |
| chr7 | 109255424 | 109255760 | Art1          | ENSMUSG000000030996 | 168  | 0.56 | 1    | 0.2  | 1    | 0.33 | 0.25 |
| chr7 | 123450845 | 123451921 | Plekha7       | ENSMUSG000000045659 | 507  | 0.32 | 0.3  | 0.11 | 0.28 | 0.21 | 0.2  |
| chr7 | 148379522 | 148381060 | Hras1         | ENSMUSG000000025499 | -510 | 0.16 | 0.12 | 0.1  | 0.14 | 0.18 | 0.16 |
| chr7 | 151739276 | 151739927 | Ppfi1         | ENSMUSG000000037519 | -10  | 0.29 | 0.22 | 0.11 | 0.12 | 0.25 | 0.13 |
| chr7 | 6335706   | 6336246   | Zfp28         | ENSMUSG000000062861 | -104 | 0.5  | 0.52 | 0.11 | 0.16 | 0.64 | 0.28 |
| chr7 | 80682631  | 80682889  | Chd2          | ENSMUSG000000078671 | -253 | 0.25 | NA   | 0.19 | 0.1  | 0.11 | 0.15 |
| chr7 | 105326422 | 105326816 | Capn5         | ENSMUSG000000035547 | 165  | 0.15 | 0.16 | 0.07 | 0.15 | 0.33 | 0.14 |

|      |           |           |               |                    |      |      |      |      |      |      |      |
|------|-----------|-----------|---------------|--------------------|------|------|------|------|------|------|------|
| chr7 | 106631865 | 106632223 | Rps3          | ENSMUSG00000030744 | 100  | 0.33 | 0.18 | 0.08 | 0.23 | 1    | 0.2  |
| chr7 | 107375729 | 107376423 | Pgm2l1        | ENSMUSG00000030729 | 172  | 0.17 | 0.27 | 0.19 | 0.17 | 0.13 | 0.13 |
| chr7 | 132850835 | 132851772 | Gtf3c1        | ENSMUSG00000032777 | -9   | 0.12 | 0.15 | 0.09 | 0.11 | 0.15 | 0.11 |
| chr7 | 52955335  | 52955705  | Car11         | ENSMUSG0000003273  | 307  | 0.08 | 0.14 | 0.08 | 0.19 | 0.14 | 0.16 |
| chr7 | 53069205  | 53069672  | Cyth2         | ENSMUSG0000003269  | -190 | 0.5  | 0.31 | 0.1  | 0.3  | 0.25 | 0.12 |
| chr7 | 129245112 | 129245470 | Ndufab1       | ENSMUSG00000030869 | -71  | 0.75 | 0.14 | 0.09 | 0.22 | 0.46 | 0.1  |
| chr7 | 146574436 | 146574677 | Inpp5a        | ENSMUSG00000025477 | -452 | 1    | 1    | 0.33 | NA   | 0.54 | NA   |
| chr7 | 148633246 | 148633920 | Rplp2         | ENSMUSG00000025508 | 314  | 0.09 | 0.19 | 0.11 | 0.06 | 0.06 | 0.12 |
| chr7 | 86293723  | 86294014  | Mfge8         | ENSMUSG00000030605 | 78   | 0.22 | 0.11 | 0.1  | 0.11 | 0.1  | 0.18 |
| chr7 | 135883297 | 135884178 | Mcmbp         | ENSMUSG00000048170 | 263  | 0.09 | 0.11 | 0.11 | 0.13 | 0.08 | 0.13 |
| chr7 | 146434131 | 146434905 | Pwwp2b        | ENSMUSG00000060260 | 137  | 0.11 | 0.06 | 0.09 | 0.12 | 0.1  | 0.15 |
| chr7 | 130513910 | 130514140 | Arhgap17      | ENSMUSG00000030766 | -596 | 0.13 | 0.11 | 0.11 | 0.18 | 0.18 | 0.17 |
| chr7 | 139158331 | 139159249 | Gpr26         | ENSMUSG00000040125 | 647  | 0.16 | 0.15 | 0.12 | 0.18 | 0.19 | 0.19 |
| chr7 | 73572152  | 73572837  | Aldh1a3       | ENSMUSG00000015134 | -91  | 0.11 | 0.14 | 0.1  | 0.14 | 0.14 | 0.17 |
| chr7 | 132634815 | 132635224 | Nsmce1        | ENSMUSG00000030750 | -106 | 0.14 | 0.56 | 0.18 | 0.36 | 0.33 | 0.15 |
| chr7 | 134028208 | 134028478 | Taok2         | ENSMUSG00000059981 | -126 | 0.2  | 0.1  | 0.21 | 0.16 | 0.1  | 0.19 |
| chr7 | 134592332 | 134592632 | Zfp689        | ENSMUSG00000048921 | 25   | 0.17 | 0.14 | 0.1  | 0.14 | 0.11 | 0.14 |
| chr7 | 19661307  | 19661743  | Dmwd          | ENSMUSG00000030410 | -73  | 0.1  | 0.09 | 0.08 | 0.11 | 0.12 | 0.16 |
| chr7 | 135666842 | 135667947 | Bag3          | ENSMUSG00000030847 | 297  | 0.1  | 0.17 | 0.13 | 0.17 | 0.09 | 0.2  |
| chr7 | 147323450 | 147323745 | Mtg1          | ENSMUSG00000039018 | 134  | 0.09 | 0.12 | 0.08 | 0.11 | 0.11 | 0.12 |
| chr7 | 19477675  | 19477916  | Ccdc61        | ENSMUSG00000074358 | 100  | 0.3  | 1    | 0.17 | 0.24 | 0.17 | 0.5  |
| chr7 | 30074232  | 30074720  | Ppp1r14a      | ENSMUSG00000037166 | 137  | 0.27 | 0.11 | 0.09 | 0.15 | 0.17 | 0.14 |
| chr7 | 107307724 | 107308315 | Lipt2         | ENSMUSG00000030725 | 232  | 0.21 | 1    | 0.23 | 0.29 | 0.09 | 0.12 |
| chr7 | 123177288 | 123177684 | 1110006G14Rik | ENSMUSG00000030664 | 1993 | 0.4  | 0.32 | 0.11 | 0.24 | 0.31 | 0.18 |
| chr7 | 13483159  | 13483427  | Zscan22       | ENSMUSG00000054715 | 129  | 0.11 | 0.08 | 0.08 | 0.17 | 0.07 | 0.17 |
| chr7 | 38352874  | 38353108  | Zfp536        | ENSMUSG00000043456 | 418  | 0.49 | 0.41 | 0.74 | 0.67 | 0.54 | 0.76 |
| chr7 | 53085971  | 53086197  | Grwd1         | ENSMUSG00000053801 | 62   | 0.42 | 0.2  | 0.17 | 0.3  | 0.33 | 0.18 |
| chr7 | 133991100 | 133991455 | Doc2a         | ENSMUSG00000052301 | 125  | 0.14 | 0.14 | 0.08 | 0.18 | 0.3  | 0.15 |
| chr7 | 134913279 | 134913725 | Orai3         | ENSMUSG00000043964 | 173  | 1    | 0.1  | 0.11 | 0.1  | 0.26 | 0.15 |
| chr7 | 146100953 | 146101670 | Bnip3         | ENSMUSG00000078566 | -149 | 0.18 | 0.21 | 0.14 | 0.2  | 0.08 | 0.13 |

|      |           |           |               |                    |      |      |      |      |      |      |      |
|------|-----------|-----------|---------------|--------------------|------|------|------|------|------|------|------|
| chr7 | 117265072 | 117266571 | Wee1          | ENSMUSG00000031016 | -43  | 0.15 | 0.08 | 0.09 | 0.15 | 0.13 | 0.15 |
| chr7 | 19955213  | 19955645  | Ppp1r13l      | ENSMUSG00000040734 | 1582 | 0.13 | 0.13 | 0.2  | 0.2  | 0.11 | 0.19 |
| chr7 | 125386535 | 125387790 | Smg1          | ENSMUSG00000030655 | -11  | 0.23 | 0.18 | 0.1  | 0.14 | 0.25 | 0.16 |
| chr7 | 134387652 | 134388258 | Zfp771        | ENSMUSG00000054716 | -85  | 0.14 | 0.2  | 0.09 | 0.16 | 0.12 | 0.15 |
| chr7 | 144504811 | 144507276 | Ebf3          | ENSMUSG00000010476 | 54   | 0.21 | 0.19 | 0.14 | 0.14 | 0.19 | 0.14 |
| chr7 | 17323695  | 17324015  | Ap2s1         | ENSMUSG00000008036 | 96   | 0.1  | 0.1  | 0.12 | 0.18 | 0.12 | 0.1  |
| chr7 | 20093593  | 20094311  | Bloc1s3       | ENSMUSG00000057667 | -272 | 0.1  | 0.13 | 0.1  | 0.1  | 0.07 | 0.15 |
| chr7 | 57014358  | 57014622  | Htatip2       | ENSMUSG00000039745 | 14   | 0.57 | 0.25 | 0.15 | 0.21 | 0.39 | 0.23 |
| chr7 | 123647706 | 123648344 | Nucb2         | ENSMUSG00000030659 | 137  | 0.09 | 0.1  | 0.1  | 0.17 | 0.14 | 0.23 |
| chr7 | 11080532  | 11080744  | Zik1          | ENSMUSG00000030393 | 105  | 0.14 | 0.08 | 0.09 | 0.28 | 0.09 | 0.11 |
| chr7 | 50720233  | 50720849  | Vsig10l       | ENSMUSG00000070604 | 1932 | 0.75 | 0.29 | 0.12 | 0.2  | 0.5  | 0.27 |
| chr7 | 63049442  | 63049789  | Tubgcp5       | ENSMUSG00000033790 | 97   | 0.1  | 0.25 | 0.17 | 0.19 | 0.08 | 0.16 |
| chr7 | 112781587 | 112782329 | Trim3         | ENSMUSG00000036989 | 41   | 0.11 | 0.17 | 0.06 | 0.1  | 0.09 | 0.11 |
| chr7 | 133709456 | 133710025 | Eif3c         | ENSMUSG00000030738 | 140  | 0.06 | 0.12 | 0.11 | 0.18 | 0.08 | 0.17 |
| chr7 | 144602136 | 144602795 | 9430038l01Rik | ENSMUSG00000040139 | -50  | 0.11 | 0.11 | 0.08 | 0.13 | 0.07 | 0.13 |
| chr7 | 16507591  | 16507835  | Sepw1         | ENSMUSG00000041571 | 38   | 0.67 | 1    | 0.31 | 1    | 0.37 | 0.29 |
| chr7 | 19857588  | 19857908  | Vasp          | ENSMUSG00000030403 | -582 | 0.11 | 0.11 | 0.07 | 0.17 | 0.07 | 0.1  |
| chr7 | 31837126  | 31837354  | Fxyd7         | ENSMUSG00000036578 | -759 | 0.12 | 0.14 | 0.15 | 0.25 | 0.2  | 0.17 |
| chr7 | 52588709  | 52589222  | Trpm4         | ENSMUSG00000038260 | 147  | 0.17 | 0.22 | 0.11 | 0.17 | 0.13 | 0.22 |
| chr7 | 3616840   | 3617119   | Leng1         | ENSMUSG00000078813 | 463  | 0.08 | 0.1  | 0.09 | 0.19 | 0.1  | 0.14 |
| chr7 | 4828580   | 4828844   | Isoc2a        | ENSMUSG00000086784 | 57   | 0.25 | NA   | 0.12 | 0.25 | 0.12 | 0.16 |
| chr7 | 52625303  | 52625989  | Lin7b         | ENSMUSG0000003872  | -91  | 0.06 | 0.1  | 0.11 | 0.13 | 0.12 | 0.14 |
| chr7 | 70589762  | 70590252  | Otud7a        | ENSMUSG00000033510 | 344  | 0.1  | 0.07 | 0.06 | 0.11 | 0.08 | 0.08 |
| chr7 | 30032258  | 30032589  | 2200002D01Rik | ENSMUSG00000030587 | 934  | 1    | 0.81 | 0.63 | 0.71 | 0.82 | 0.75 |
| chr7 | 106683927 | 106684395 | Arrb1         | ENSMUSG00000018909 | 185  | 0.29 | 0.13 | 0.12 | 0.13 | 0.16 | 0.15 |
| chr7 | 4740618   | 4741224   | 2210411K11Rik | ENSMUSG00000030431 | 223  | 0.07 | 0.09 | 0.08 | 0.06 | 0.06 | 0.12 |
| chr7 | 20437490  | 20437764  | Gm19345       | ENSMUSG00000092216 | 275  | 0.33 | 0.12 | 0.11 | 0.5  | 0.17 | 0.25 |
| chr7 | 26003824  | 26005063  | Dedd2         | ENSMUSG00000054499 | 435  | 0.14 | 0.21 | 0.13 | 0.16 | 0.11 | 0.17 |
| chr7 | 46773086  | 46773450  | Zfp619        | ENSMUSG00000068959 | 132  | 0.5  | 0.07 | 0.08 | 0.16 | 0.1  | 0.18 |
| chr7 | 148660831 | 148661686 | Poir2l        | ENSMUSG00000038489 | -227 | 0.11 | 0.1  | 0.1  | 0.11 | 0.12 | 0.12 |

|      |           |           |               |                     |      |      |      |      |      |      |      |
|------|-----------|-----------|---------------|---------------------|------|------|------|------|------|------|------|
| chr7 | 29156572  | 29158015  | Plekhhg2      | ENSMUSG000000037552 | -700 | 0.29 | 0.39 | 0.12 | 0.16 | 0.26 | 0.15 |
| chr7 | 109358238 | 109358805 | Nup98         | ENSMUSG000000063550 | -140 | 0.14 | 0.3  | 0.16 | 0.21 | 0.11 | 0.13 |
| chr7 | 127039619 | 127039921 | Dcun1d3       | ENSMUSG000000048787 | 35   | 0.16 | 0.11 | 0.12 | 0.1  | 0.12 | 0.13 |
| chr7 | 133935430 | 133936204 | Ppp4c         | ENSMUSG000000030697 | 168  | 0.13 | 0.19 | 0.11 | 0.14 | 0.14 | 0.11 |
| chr7 | 26503835  | 26504150  | Ccdc97        | ENSMUSG000000002608 | 18   | 0.25 | 0.25 | 0.1  | 0.16 | 0.28 | 0.14 |
| chr7 | 108812209 | 108812621 | Clpb          | ENSMUSG000000001829 | 196  | 0.08 | 0.07 | 0.1  | 0.11 | 0.12 | 0.17 |
| chr7 | 16894773  | 16895938  | Bbc3          | ENSMUSG000000002083 | 390  | 0.15 | 0.17 | 0.1  | 0.12 | 0.17 | 0.12 |
| chr7 | 19734439  | 19735273  | Qpctl         | ENSMUSG000000030407 | -311 | 0.25 | 0.16 | 0.15 | 0.13 | 0.18 | 0.16 |
| chr7 | 35098007  | 35098731  | 4931406P16Rik | ENSMUSG000000066571 | 172  | 0.24 | 0.17 | 0.1  | 0.13 | 0.22 | 0.17 |
| chr7 | 86536918  | 86537505  | Fanci         | ENSMUSG000000039187 | 8    | 0.27 | 0.33 | 0.09 | 0.15 | 0.14 | 0.09 |
| chr7 | 139507287 | 139509009 | Chst15        | ENSMUSG000000030930 | 249  | 0.19 | 0.31 | 0.12 | 0.14 | 0.22 | 0.18 |
| chr7 | 70356933  | 70357536  | Chrna7        | ENSMUSG000000030525 | 178  | 0.2  | 0.6  | 0.11 | 0.21 | 0.17 | 0.11 |
| chr7 | 140968165 | 140968722 | Dhx32         | ENSMUSG000000030986 | -251 | 0.17 | 0.3  | 0.08 | 0.15 | 0.19 | 0.13 |
| chr7 | 88638243  | 88638670  | Ap3b2         | ENSMUSG000000062444 | 136  | 0.09 | 0.31 | 0.09 | 0.18 | 0.12 | 0.14 |
| chr7 | 151864382 | 151864853 | Ano1          | ENSMUSG000000031075 | 173  | 0.09 | 0.1  | 0.11 | 0.11 | 0.1  | 0.14 |
| chr7 | 73224347  | 73224889  | H47           | ENSMUSG000000075701 | 83   | 0.1  | 0.19 | 0.17 | 0.21 | 0.13 | 0.13 |
| chr7 | 87947811  | 87948426  | Iqgap1        | ENSMUSG000000030536 | 99   | 0.19 | 0.25 | 0.13 | 0.15 | 0.21 | 0.22 |
| chr7 | 4088447   | 4089211   | D030047H15Rik | ENSMUSG000000085886 | -301 | 0.13 | 0.41 | 0.08 | 0.29 | 0.14 | 0.17 |
| chr7 | 25266443  | 25267492  | Cadm4         | ENSMUSG000000054793 | -75  | 0.23 | 0.15 | 0.12 | 0.15 | 0.21 | 0.18 |
| chr7 | 56136043  | 56137137  | E2f8          | ENSMUSG000000046179 | -216 | 0.09 | 0.14 | 0.1  | 0.18 | 0.11 | 0.14 |
| chr7 | 89796849  | 89797324  | Fam154b       | ENSMUSG000000038570 | -53  | 0.2  | 0.22 | 0.11 | 0.11 | 0.17 | 0.11 |
| chr7 | 105259804 | 105260068 | Myo7a         | ENSMUSG000000030761 | 1236 | 0.3  | 0.11 | 0.16 | 0.27 | 0.21 | 0.28 |
| chr7 | 117129455 | 117130064 | Tmem41b       | ENSMUSG000000047554 | -83  | 0.41 | 0.65 | 0.14 | 0.34 | 0.3  | 0.2  |
| chr7 | 119166716 | 119167680 | Usp47         | ENSMUSG000000059263 | 178  | 0.14 | 0.18 | 0.1  | 0.17 | 0.15 | 0.11 |
| chr7 | 148108288 | 148108812 | Nlrp6         | ENSMUSG000000038745 | 1698 | 0.08 | 0.07 | 0.1  | 0.16 | 0.06 | 0.1  |
| chr7 | 148285853 | 148286524 | Sigirr        | ENSMUSG000000025494 | 257  | 0.17 | 0.5  | 0.15 | 0.14 | 0.21 | 0.2  |
| chr7 | 17038273  | 17038548  | Tmem160       | ENSMUSG000000019158 | 282  | 0.13 | 0.19 | 0.13 | 0.09 | 0.09 | 0.17 |
| chr7 | 30023100  | 30023629  | Yif1b         | ENSMUSG000000030588 | 16   | 0.2  | 0.13 | 0.1  | 0.17 | 0.12 | 0.15 |
| chr7 | 50568035  | 50568601  | Zfp715        | ENSMUSG000000012640 | 115  | 0.13 | 0.09 | 0.11 | 0.13 | 0.11 | 0.14 |
| chr7 | 87547852  | 87548053  | Furin         | ENSMUSG000000030530 | 256  | 0.25 | NA   | 0.4  | 1    | 1    | 0.43 |

|      |           |           |               |                    |      |      |      |      |      |      |      |
|------|-----------|-----------|---------------|--------------------|------|------|------|------|------|------|------|
| chr7 | 125855933 | 125856428 | 6330503K22Rik | ENSMUSG00000033904 | 114  | 0.12 | 0.25 | 0.17 | 0.26 | 0.18 | 0.18 |
| chr7 | 91040509  | 91040966  | Mesdc2        | ENSMUSG00000038503 | 227  | 1    | 0.56 | 0.13 | 0.42 | 0.33 | 0.19 |
| chr7 | 121706083 | 121706583 | Cyp2r1        | ENSMUSG00000030670 | 143  | 0.19 | 0.12 | 0.1  | 0.16 | 0.16 | 0.17 |
| chr7 | 134185695 | 134186063 | Kif22         | ENSMUSG00000030677 | 55   | 0.17 | 0.41 | 0.14 | 0.18 | 0.21 | 0.2  |
| chr7 | 148317086 | 148317593 | Ptdss2        | ENSMUSG00000025495 | 154  | 0.14 | 0.12 | 0.08 | 0.13 | 0.12 | 0.12 |
| chr7 | 148524736 | 148524954 | Eps8l2        | ENSMUSG00000025504 | 66   | 0.13 | 0.21 | 0.19 | 0.22 | 0.11 | 0.19 |
| chr7 | 117103414 | 117104213 | Dennd5a       | ENSMUSG00000035901 | 24   | 0.22 | 0.25 | 0.12 | 0.15 | 0.2  | 0.18 |
| chr7 | 148042946 | 148043558 | Ric8          | ENSMUSG00000025485 | 38   | 0.16 | 0.16 | 0.14 | 0.15 | 0.14 | 0.14 |
| chr7 | 125884050 | 125884255 | 9030624J02Rik | ENSMUSG00000030982 | -94  | 0.33 | 0.08 | 0.12 | 0.12 | 0.21 | 0.11 |
| chr7 | 146766819 | 146768827 | Nkx6-2        | ENSMUSG00000041309 | 866  | 0.25 | 0.26 | 0.13 | 0.18 | 0.26 | 0.17 |
| chr7 | 19680163  | 19680870  | Six5          | ENSMUSG00000040841 | 573  | 0.16 | 0.21 | 0.11 | 0.15 | 0.14 | 0.13 |
| chr7 | 20189498  | 20189927  | Clasrp        | ENSMUSG00000061028 | 105  | 0.16 | 0.09 | 0.09 | 0.1  | 0.18 | 0.09 |
| chr7 | 124524470 | 124525072 | Xylt1         | ENSMUSG00000030657 | 278  | 0.11 | 0.12 | 0.07 | 0.13 | 0.1  | 0.1  |
| chr7 | 149280284 | 149281415 | Dusp8         | ENSMUSG00000037887 | 328  | 0.29 | 0.14 | 0.13 | 0.14 | 0.27 | 0.14 |
| chr7 | 19988995  | 19989632  | Klc3          | ENSMUSG00000040714 | 140  | 0.09 | 0.14 | 0.11 | 0.15 | 0.07 | 0.1  |
| chr7 | 25654717  | 25655240  | Lypd4         | ENSMUSG00000062732 | -227 | 0.71 | 0.88 | 0.62 | 0.76 | 0.64 | 0.46 |
| chr7 | 26601294  | 26601717  | Cyp2s1        | ENSMUSG00000040703 | 72   | 0.1  | 0.06 | 0.06 | 0.1  | 0.13 | 0.09 |
| chr7 | 51924555  | 51924776  | Myh14         | ENSMUSG00000030739 | 53   | 0.18 | 0.22 | 0.27 | 0.29 | 0.15 | 0.19 |
| chr7 | 87170025  | 87170429  | Zfp710        | ENSMUSG00000048897 | 527  | 0.42 | 0.16 | 0.16 | 0.21 | 0.36 | 0.13 |
| chr7 | 134530135 | 134530467 | 9130019O22Rik | ENSMUSG00000030823 | 326  | 0.12 | 0.5  | 0.11 | NA   | 0.33 | 0.33 |
| chr7 | 7074005   | 7074225   | Zfp954        | ENSMUSG00000062116 | 41   | 0.19 | NA   | 0.13 | 0.16 | 0.17 | 0.22 |
| chr7 | 17460779  | 17460999  | Dact3         | ENSMUSG00000078794 | 144  | 0.07 | 0.06 | 0.13 | 0.13 | 0.08 | 0.08 |
| chr7 | 31911538  | 31912198  | Scn1b         | ENSMUSG00000019194 | 96   | 0.11 | 0.15 | 0.09 | 0.13 | 0.12 | 0.15 |
| chr7 | 81157487  | 81158996  | St8sia2       | ENSMUSG00000025789 | 327  | 0.17 | 0.13 | 0.11 | 0.19 | 0.18 | 0.15 |
| chr7 | 148246583 | 148247492 | B4galnt4      | ENSMUSG00000055629 | -136 | 0.09 | 0.05 | 0.08 | 0.12 | 0.1  | 0.13 |
| chr7 | 148547440 | 148547723 | Eps8l2        | ENSMUSG00000025504 | 145  | 0.08 | 0.09 | 0.17 | 0.21 | 0.11 | 0.16 |
| chr7 | 148577787 | 148578314 | Taldo1        | ENSMUSG00000025503 | -48  | 0.07 | 0.08 | 0.08 | 0.13 | 0.09 | 0.18 |
| chr7 | 31514252  | 31515049  | Tmem147       | ENSMUSG00000006315 | -97  | 0.1  | 0.08 | 0.09 | 0.15 | 0.08 | 0.16 |
| chr7 | 108042968 | 108043398 | Arhgef17      | ENSMUSG00000032875 | -83  | 0.18 | 0.13 | 0.06 | 0.13 | 0.22 | 0.13 |
| chr7 | 132588120 | 132588722 | Jmjd5         | ENSMUSG00000030752 | 231  | 0.18 | 0.1  | 0.14 | 0.18 | 0.16 | 0.22 |

|      |           |           |               |                    |       |      |      |      |      |      |      |
|------|-----------|-----------|---------------|--------------------|-------|------|------|------|------|------|------|
| chr7 | 134920101 | 134921234 | Setd1a        | ENSMUSG00000042308 | 483   | 0.09 | 0.12 | 0.08 | 0.09 | 0.08 | 0.15 |
| chr7 | 148653272 | 148653810 | Gm10575       | ENSMUSG00000073787 | 129   | 0.09 | 0.07 | 0.08 | 0.12 | 0.08 | 0.27 |
| chr7 | 152082369 | 152083172 | Fgf15         | ENSMUSG00000031073 | 333   | 0.25 | 0.06 | 0.11 | 0.1  | 0.1  | 0.14 |
| chr7 | 26022610  | 26022965  | Gsk3a         | ENSMUSG00000057177 | 83    | 0.18 | 0.21 | 0.09 | 0.15 | 0.21 | 0.14 |
| chr7 | 29415374  | 29415836  | C330005M16Rik | ENSMUSG00000037469 | -86   | 0.16 | 0.17 | 0.12 | 0.22 | 0.19 | 0.14 |
| chr7 | 35971379  | 35971690  | Slc7a10       | ENSMUSG00000030495 | 130   | 0.09 | 0.1  | 0.11 | 0.14 | 0.08 | 0.16 |
| chr7 | 112548367 | 112548832 | Fam160a2      | ENSMUSG00000044465 | -100  | 0.25 | 0.25 | 0.17 | 0.23 | 0.31 | 0.24 |
| chr7 | 116226590 | 116226954 | Ric3          | ENSMUSG00000048330 | 47    | 0.1  | 0.08 | 0.1  | 0.22 | 0.06 | 0.17 |
| chr7 | 133630665 | 133631182 | Tufm          | ENSMUSG00000073838 | 54    | 0.21 | 0.07 | 0.09 | 0.2  | 0.19 | 0.17 |
| chr7 | 146373668 | 146374588 | Stk32c        | ENSMUSG00000015981 | 288   | 0.08 | 0.17 | 0.09 | 0.13 | 0.07 | 0.12 |
| chr7 | 35988797  | 35989216  | Lrp3          | ENSMUSG00000001802 | -763  | 0.82 | 0.91 | 0.78 | 0.97 | 1    | 0.96 |
| chr7 | 57033612  | 57034216  | Prmt3         | ENSMUSG00000030505 | 198   | 0.1  | 0.12 | 0.1  | 0.14 | 0.08 | 0.09 |
| chr7 | 86887580  | 86888053  | Pex11a        | ENSMUSG00000030545 | 92    | 0.11 | NA   | 0.25 | 0.19 | 0.17 | 0.2  |
| chr7 | 88489438  | 88490317  | Rps17         | ENSMUSG00000061787 | 233   | 0.12 | 0.1  | 0.18 | 0.16 | 0.1  | 0.14 |
| chr7 | 138514577 | 138514950 | Pstk          | ENSMUSG00000063179 | 108   | 0.22 | 0.25 | 0.11 | 0.17 | 0.17 | 0.23 |
| chr7 | 19930381  | 19930857  | Ercc1         | ENSMUSG00000003549 | 169   | 0.12 | 0.18 | 0.09 | 0.22 | 0.11 | 0.15 |
| chr7 | 20334373  | 20335137  | Pvrl2         | ENSMUSG00000062300 | 167   | 0.17 | 0.27 | 0.09 | 0.18 | 0.18 | 0.17 |
| chr7 | 28232864  | 28233307  | Blvrb         | ENSMUSG00000040466 | 88    | 0.15 | 0.09 | 0.11 | 0.16 | 0.14 | 0.1  |
| chr7 | 86854938  | 86855405  | 9330171B17Rik | ENSMUSG00000039133 | -86   | 0.12 | 0.22 | 0.09 | 0.11 | 0.11 | 0.1  |
| chr7 | 87377297  | 87377808  | Cib1          | ENSMUSG00000030538 | -171  | 0.2  | 0.11 | 0.09 | 0.15 | 0.16 | 0.17 |
| chr7 | 117912048 | 117912487 | Ampd3         | ENSMUSG00000005686 | 410   | 0.24 | 0.27 | 0.15 | 0.31 | 0.25 | 0.16 |
| chr7 | 139802247 | 139802592 | Lhpp          | ENSMUSG00000030946 | 98    | 0.21 | 0.45 | 0.12 | 0.12 | 0.27 | 0.24 |
| chr7 | 147164415 | 147164704 | 6430531B16Rik | ENSMUSG00000073795 | 63    | 0.32 | 0.26 | 0.08 | 0.13 | 0.22 | 0.11 |
| chr7 | 4103046   | 4103347   | Leng9         | ENSMUSG00000043432 | -1722 | 0.12 | 0.15 | 0.14 | 0.27 | 0.16 | 0.27 |
| chr7 | 28146570  | 28146877  | AC157561.1    | ENSMUSG00000080562 | -1610 | 0.75 | 0.8  | 0.09 | 0.37 | 0.68 | 0.29 |
| chr7 | 106289107 | 106289769 | Uvrag         | ENSMUSG00000035354 | 216   | 0.1  | 0.1  | 0.08 | 0.13 | 0.1  | 0.1  |
| chr7 | 128877755 | 128878567 | Scnn1g        | ENSMUSG00000000216 | 168   | 0.06 | 0.08 | 0.13 | 0.19 | 0.1  | 0.11 |
| chr7 | 6124494   | 6124699   | Zfp444        | ENSMUSG00000044876 | 481   | 0.1  | 0.08 | 0.11 | 0.17 | 0.09 | 0.09 |
| chr7 | 31106995  | 31107478  | Sdhaf1        | ENSMUSG00000074211 | 158   | 0.08 | 0.1  | 0.1  | 0.15 | 0.09 | 0.12 |
| chr7 | 53965690  | 53966123  | Saal1         | ENSMUSG00000006763 | 105   | 0.42 | 0.45 | 0.12 | 0.31 | 1    | 0.08 |

|      |           |           |               |                    |       |      |      |      |      |      |      |
|------|-----------|-----------|---------------|--------------------|-------|------|------|------|------|------|------|
| chr7 | 97278286  | 97279179  | Picalm        | ENSMUSG00000039361 | 9     | 0.08 | 0.12 | 0.09 | 0.14 | 0.07 | 0.1  |
| chr7 | 108966505 | 108967235 | Phox2a        | ENSMUSG0000007946  | 43    | 0.15 | 0.13 | 0.17 | 0.11 | 0.13 | 0.12 |
| chr7 | 140313402 | 140316538 | Ctbp2         | ENSMUSG00000030970 | -1087 | 0.11 | 0.13 | 0.11 | 0.14 | 0.12 | 0.16 |
| chr7 | 13594973  | 13595448  | Zbtb45        | ENSMUSG00000049600 | -61   | 0.13 | 0.06 | 0.12 | 0.11 | 0.08 | 0.18 |
| chr7 | 17060907  | 17062179  | Npas1         | ENSMUSG0000001988  | 586   | 0.26 | 0.18 | 0.1  | 0.18 | 0.22 | 0.18 |
| chr7 | 17509089  | 17509769  | Calm3         | ENSMUSG00000019370 | -251  | 0.2  | 0.19 | 0.12 | 0.18 | 0.17 | 0.17 |
| chr7 | 29221328  | 29221901  | Gmfg          | ENSMUSG00000060791 | -852  | 0.1  | 0.12 | 0.13 | 0.15 | 0.09 | 0.14 |
| chr7 | 36371083  | 36371632  | Ankrd27       | ENSMUSG00000034867 | 91    | 0.17 | 0.35 | 0.14 | 0.13 | 0.29 | 0.2  |
| chr7 | 52071269  | 52071791  | Nup62         | ENSMUSG00000043858 | 72    | 0.5  | 0.75 | 0.18 | 0.18 | 0.56 | 0.15 |
| chr7 | 87439142  | 87439748  | Prc1          | ENSMUSG00000038943 | 109   | 0.24 | 0.07 | 0.14 | 0.11 | 0.23 | 0.13 |
| chr7 | 99818055  | 99818669  | Pcf11         | ENSMUSG00000041328 | 81    | 0.09 | 0.19 | 0.15 | 0.12 | 0.08 | 0.19 |
| chr7 | 104845032 | 104845661 | Gm15623       | ENSMUSG00000086993 | -293  | 0.1  | 0.13 | 0.1  | 0.13 | 0.09 | 0.15 |
| chr7 | 120909551 | 120910202 | Spon1         | ENSMUSG00000038156 | 188   | 0.12 | 0.11 | 0.08 | 0.12 | 0.11 | 0.12 |
| chr7 | 135441270 | 135441641 | BC017158      | ENSMUSG00000030780 | 154   | 0.15 | 0.1  | 0.13 | 0.08 | 0.12 | 0.1  |
| chr7 | 31740804  | 31742702  | Gm17077       | ENSMUSG00000090357 | 909   | 0.2  | 0.18 | 0.1  | 0.16 | 0.19 | 0.16 |
| chr7 | 82600390  | 82601173  | Akap13        | ENSMUSG00000066406 | 361   | 0.07 | 0.1  | 0.09 | 0.17 | 0.07 | 0.15 |
| chr7 | 108986023 | 108986781 | Inpp1         | ENSMUSG00000032737 | -64   | 0.21 | 0.08 | 0.1  | 0.21 | 0.17 | 0.15 |
| chr7 | 134119535 | 134120122 | D830044116Rik | ENSMUSG00000087483 | -216  | 0.14 | NA   | 0.14 | 0.23 | 0.09 | 0.2  |
| chr7 | 142907522 | 142908398 | Mki67         | ENSMUSG00000031004 | 102   | 0.08 | 0.07 | 0.11 | 0.14 | 0.07 | 0.1  |
| chr7 | 29940570  | 29941345  | Fam98c        | ENSMUSG00000030590 | -335  | 0.07 | 0.09 | 0.1  | 0.17 | 0.06 | 0.1  |
| chr7 | 52616867  | 52617200  | Ppfia3        | ENSMUSG0000003863  | -1550 | 0.18 | 0.1  | 0.11 | 0.15 | 0.08 | 0.1  |
| chr7 | 109371538 | 109371761 | Pgap2         | ENSMUSG00000030990 | 107   | 0.2  | 0.18 | 0.13 | 0.25 | 0.09 | 0.2  |
| chr7 | 152125474 | 152125726 | Ccnd1         | ENSMUSG00000070348 | 174   | 0.1  | 0.2  | 0.09 | 0.11 | 0.1  | 0.13 |
| chr7 | 4691664   | 4692000   | Suv420h2      | ENSMUSG00000059851 | 115   | 0.27 | 0.08 | 0.14 | 0.26 | 0.24 | 0.11 |
| chr7 | 31016566  | 31017631  | Polr2i        | ENSMUSG00000019738 | 131   | 0.31 | 0.48 | 0.21 | 0.15 | 0.37 | 0.18 |
| chr7 | 34953024  | 34953667  | Uba2          | ENSMUSG00000052997 | 249   | 0.2  | 0.2  | 0.12 | 0.16 | 0.19 | 0.17 |
| chr7 | 51501704  | 51502522  | 2410002F23Rik | ENSMUSG00000045411 | 21    | 0.12 | 0.11 | 0.12 | 0.16 | 0.11 | 0.21 |
| chr7 | 104229957 | 104230907 | Gab2          | ENSMUSG0000004508  | 171   | 0.06 | 0.11 | 0.11 | 0.13 | 0.07 | 0.1  |
| chr7 | 138695828 | 138696277 | Hmx2          | ENSMUSG00000050100 | -1524 | 0.07 | 0.19 | 0.14 | 0.16 | 0.08 | 0.15 |
| chr7 | 4763310   | 4764342   | Ube2s         | ENSMUSG00000060860 | 116   | 0.17 | 0.09 | 0.12 | 0.14 | 0.15 | 0.15 |

|      |          |          |               |                     |       |      |      |      |      |      |      |
|------|----------|----------|---------------|---------------------|-------|------|------|------|------|------|------|
| chr7 | 16897437 | 16897799 | Bbc3          | ENSMUSG00000002083  | -1248 | 0.33 | 0.26 | 0.14 | 0.16 | 0.32 | 0.14 |
| chr7 | 30017183 | 30017741 | Kcnk6         | ENSMUSG000000046410 | 79    | 0.13 | 0.1  | 0.08 | 0.17 | 0.15 | 0.13 |
| chr7 | 87414464 | 87414730 | Vps33b        | ENSMUSG000000030534 | 62    | 0.19 | 0.2  | 0.1  | 0.21 | 0.17 | 0.25 |
| chr7 | 54263131 | 54264161 | Spty2d1       | ENSMUSG000000049516 | 135   | 0.2  | 0.26 | 0.17 | 0.29 | 0.17 | 0.19 |
| chr7 | 3637345  | 3637585  | Mboat7        | ENSMUSG000000035596 | -1335 | 0.92 | 0.9  | 0.77 | 0.84 | 0.93 | 0.83 |
| chr7 | 3644129  | 3646433  | Mboat7        | ENSMUSG000000035596 | -741  | 0.1  | 0.09 | 0.11 | 0.14 | 0.1  | 0.19 |
| chr7 | 4452676  | 4453411  | Ppp1r12c      | ENSMUSG000000019254 | -80   | 0.18 | 0.17 | 0.09 | 0.13 | 0.17 | 0.12 |
| chr7 | 4610038  | 4611059  | Ppp6r1        | ENSMUSG000000052296 | 4     | 0.54 | 0.27 | 0.22 | 0.37 | 0.55 | 0.34 |
| chr7 | 4781574  | 4781826  | Shisa7        | ENSMUSG000000053550 | 1029  | 0.94 | 0.91 | 0.62 | 0.77 | 1    | 0.83 |
| chr7 | 4817570  | 4817829  | Isoc2b        | ENSMUSG000000052605 | 71    | 0.08 | 0.07 | 0.09 | 0.13 | 0.11 | 0.08 |
| chr7 | 5031676  | 5032282  | Epn1          | ENSMUSG000000035203 | 142   | 0.07 | 0.15 | 0.11 | 0.12 | 0.07 | 0.17 |
| chr7 | 6237803  | 6238195  | Zfp667        | ENSMUSG000000054893 | -182  | 0.1  | 0.3  | 0.07 | 0.14 | 0.1  | 0.15 |
| chr7 | 13403808 | 13404238 | Zfp329        | ENSMUSG000000057894 | 178   | 0.08 | 0.13 | 0.12 | 0.11 | 0.09 | 0.11 |
| chr7 | 13609308 | 13610493 | Trim28        | ENSMUSG00000005566  | 399   | 0.33 | 1    | 0.19 | 0.09 | 0.33 | 0.22 |
| chr7 | 13622792 | 13623032 | Ube2m         | ENSMUSG00000005575  | -42   | 0.06 | 0.06 | 0.07 | 0.15 | 0.07 | 0.15 |
| chr7 | 13863826 | 13864440 | 6330408A02Rik | ENSMUSG000000070814 | -122  | 0.27 | 0.21 | 0.07 | 0.08 | 0.33 | 0.13 |
| chr7 | 16871579 | 16872145 | Ccdc9         | ENSMUSG000000041375 | 260   | 0.11 | 0.27 | 0.07 | 0.18 | 0.12 | 0.16 |
| chr7 | 17427968 | 17428434 | Prkd2         | ENSMUSG000000041187 | -82   | 0.11 | NA   | 0.14 | 0.15 | 0.12 | 0.09 |
| chr7 | 17612905 | 17613308 | Ppp5c         | ENSMUSG00000003099  | -142  | 0.08 | 0.07 | 0.06 | 0.22 | 0.06 | 0.16 |
| chr7 | 17641567 | 17641865 | Hif3a         | ENSMUSG00000004328  | 312   | 0.09 | 0.17 | 0.15 | 0.13 | 0.09 | 0.13 |
| chr7 | 19479163 | 19479499 | Ccdc61        | ENSMUSG000000074358 | -1436 | 0.33 | NA   | NA   | NA   | 1    | NA   |
| chr7 | 19609495 | 19609815 | Sympk         | ENSMUSG000000023118 | -71   | 0.07 | 0.06 | 0.05 | 0.1  | 0.06 | 0.11 |
| chr7 | 20006539 | 20006886 | A930016O22Rik | ENSMUSG000000040705 | 54    | 0.12 | 0.21 | 0.1  | 0.14 | 0.15 | 0.13 |
| chr7 | 20105356 | 20105600 | Nkpd1         | ENSMUSG000000060621 | 1398  | 0.09 | 0.12 | 0.12 | 0.23 | 0.08 | 0.12 |
| chr7 | 20158392 | 20158871 | Gemin7        | ENSMUSG000000044709 | -193  | 0.05 | 0.09 | 0.1  | 0.22 | 0.05 | 0.09 |
| chr7 | 20381905 | 20382174 | Cblc          | ENSMUSG000000040525 | 103   | 0.19 | 0.52 | 0.19 | 0.38 | 0.19 | 0.2  |
| chr7 | 20506347 | 20506584 | Pvr           | ENSMUSG000000040511 | -3    | 0.12 | 0.38 | 0.1  | 0.52 | 0.16 | 0.19 |
| chr7 | 25669245 | 25669993 | Rps19         | ENSMUSG000000040952 | 229   | 0.15 | 0.16 | 0.1  | 0.15 | 0.16 | 0.14 |
| chr7 | 25689269 | 25689473 | Arhgef1       | ENSMUSG000000040940 | -6    | 0.5  | 0.18 | 0.22 | 0.23 | 0.31 | 0.18 |
| chr7 | 25918248 | 25918476 | Pou2f2        | ENSMUSG000000008496 | -831  | 0.55 | 0.68 | 0.16 | 0.3  | 0.67 | 0.26 |



|      |          |          |               |                     |       |      |      |      |      |      |      |
|------|----------|----------|---------------|---------------------|-------|------|------|------|------|------|------|
| chr7 | 26063385 | 26064290 | Cic           | ENSMUSG00000005442  | 396   | 0.07 | 0.12 | 0.08 | 0.1  | 0.07 | 0.08 |
| chr7 | 26152977 | 26153204 | Cnfn          | ENSMUSG000000063651 | 1653  | 0.5  | 0.43 | 0.28 | 0.55 | 0.51 | 0.28 |
| chr7 | 26465667 | 26466158 | B9d2          | ENSMUSG000000063439 | -265  | 1    | 1    | 1    | 1    | 1    | NA   |
| chr7 | 26539284 | 26540352 | Hnrnpul1      | ENSMUSG000000040725 | -98   | 0.11 | 0.23 | 0.11 | 0.16 | 0.11 | 0.13 |
| chr7 | 28013188 | 28013804 | Itpkc         | ENSMUSG000000003752 | 151   | 0.36 | 0.29 | 0.11 | 0.19 | 0.35 | 0.16 |
| chr7 | 28043595 | 28043981 | Numbl         | ENSMUSG000000063160 | 44    | 0.14 | 0.19 | 0.17 | 0.17 | 0.16 | 0.16 |
| chr7 | 28118364 | 28118638 | Ltbp4         | ENSMUSG000000040488 | 131   | 0.14 | 0.08 | 0.08 | 0.11 | 0.17 | 0.1  |
| chr7 | 28119478 | 28119931 | Ltbp4         | ENSMUSG000000040488 | -1022 | 0.21 | 0.16 | 0.14 | 0.15 | 0.18 | 0.12 |
| chr7 | 28255417 | 28255637 | Pgam1-ps2     | ENSMUSG000000082016 | 27    | 0.87 | 0.94 | 0.86 | 0.84 | 0.86 | 0.91 |
| chr7 | 28292804 | 28293302 | Prx           | ENSMUSG000000053198 | 233   | 0.11 | 0.1  | 0.07 | 0.16 | 0.13 | 0.11 |
| chr7 | 29075947 | 29076302 | BC089491      | ENSMUSG000000046750 | 29    | 0.08 | 0.15 | 0.1  | 0.16 | 0.08 | 0.15 |
| chr7 | 29086302 | 29086525 | Dll3          | ENSMUSG000000003436 | 378   | 0.09 | 0.08 | 0.14 | 0.28 | 0.09 | 0.13 |
| chr7 | 29478299 | 29478640 | Fbxo27        | ENSMUSG000000037463 | 306   | 0.15 | 0.1  | 0.09 | 0.07 | 0.14 | 0.16 |
| chr7 | 29501564 | 29502101 | Fbxo17        | ENSMUSG000000030598 | 9     | 0.18 | 0.31 | 0.14 | 0.27 | 0.18 | 0.14 |
| chr7 | 29517500 | 29517927 | Fbxo17        | ENSMUSG000000030598 | 194   | 1    | NA   | 0.43 | NA   | 1    | 0.23 |
| chr7 | 29766641 | 29766850 | Eif3k         | ENSMUSG000000053565 | 88    | 0.24 | 0.4  | 0.12 | 0.2  | 0.33 | 0.22 |
| chr7 | 30092902 | 30093299 | Dpf1          | ENSMUSG000000030584 | 157   | 0.17 | 0.12 | 0.11 | 0.25 | 0.17 | 0.19 |
| chr7 | 30738597 | 30739047 | C230062116Rik | ENSMUSG000000063623 | 182   | 0.16 | 0.31 | 0.13 | 0.22 | 0.15 | 0.16 |
| chr7 | 30768747 | 30769227 | Zfp568        | ENSMUSG000000074221 | 13    | 0.15 | 0.09 | 0.11 | 0.14 | 0.14 | 0.13 |
| chr7 | 31017759 | 31018009 | Poir2i        | ENSMUSG000000019738 | -67   | 0.33 | 0.25 | 0.11 | 0.14 | 0.21 | 0.21 |
| chr7 | 31140749 | 31141111 | U2            | ENSMUSG000000064982 | 1013  | 1    | 1    | 0.88 | NA   | 0.9  | 0.83 |
| chr7 | 31147759 | 31148181 | Lfn3          | ENSMUSG000000036957 | -179  | 0.5  | 0.22 | 0.12 | 0.15 | 0.54 | 0.18 |
| chr7 | 31229627 | 31229833 | Aplp1         | ENSMUSG000000066651 | 850   | 0.5  | NA   | NA   | NA   | 0.33 | NA   |
| chr7 | 31242017 | 31242220 | Kirrel2       | ENSMUSG000000036915 | -250  | 0.06 | 0.33 | 0.18 | 0.25 | 0.08 | 0.15 |
| chr7 | 31319906 | 31320477 | Arhgap33      | ENSMUSG000000036882 | -112  | 0.17 | 0.67 | 0.1  | 0.13 | 0.33 | 0.19 |
| chr7 | 31373744 | 31374591 | Wbp7          | ENSMUSG000000006307 | -422  | 0.18 | 0.16 | 0.11 | 0.1  | 0.17 | 0.1  |
| chr7 | 31434986 | 31435439 | Rbm42         | ENSMUSG000000036733 | -49   | 0.18 | 0.13 | 0.09 | 0.16 | 0.18 | 0.13 |
| chr7 | 31502076 | 31502321 | Atp4a         | ENSMUSG000000005553 | -653  | 0.11 | 0.13 | 0.09 | 0.17 | 0.1  | 0.12 |
| chr7 | 35019029 | 35019428 | Gm12762       | ENSMUSG000000086526 | -134  | 0.08 | 0.12 | 0.09 | 0.26 | 0.07 | 0.15 |
| chr7 | 35841028 | 35841762 | Cebpg         | ENSMUSG000000056216 | 127   | 0.12 | 0.09 | 0.1  | 0.13 | 0.13 | 0.12 |

|      |          |          |               |                    |       |      |      |      |      |      |      |
|------|----------|----------|---------------|--------------------|-------|------|------|------|------|------|------|
| chr7 | 35970325 | 35970551 | Slc7a10       | ENSMUSG00000030495 | -966  | 0.17 | 0.14 | 0.11 | 0.11 | 0.2  | 0.15 |
| chr7 | 36431860 | 36432678 | Pdcd5         | ENSMUSG00000030417 | -41   | 0.15 | 0.14 | 0.11 | 0.14 | 0.15 | 0.13 |
| chr7 | 39012921 | 39013266 | Plekhf1       | ENSMUSG00000074170 | -80   | 0.2  | 0.1  | 0.18 | 0.24 | 0.2  | 0.12 |
| chr7 | 51591323 | 51591618 | Shank1        | ENSMUSG00000038738 | 84    | 0.13 | 0.17 | 0.08 | 0.08 | 0.14 | 0.09 |
| chr7 | 51723358 | 51723591 | Josd2         | ENSMUSG00000038695 | 98    | 0.08 | 0.07 | 0.08 | 0.09 | 0.08 | 0.11 |
| chr7 | 51751584 | 51752439 | 2310044H10Rik | ENSMUSG00000008140 | -244  | 0.23 | 0.1  | 0.14 | 0.14 | 0.24 | 0.15 |
| chr7 | 52072132 | 52072350 | Atf5          | ENSMUSG00000038539 | -213  | 0.09 | 0.05 | NA   | 0.13 | 0.07 | NA   |
| chr7 | 52151503 | 52151754 | Fuz           | ENSMUSG00000011658 | 112   | 0.5  | NA   | 0.11 | 0.11 | 0.33 | 0.18 |
| chr7 | 52271138 | 52271833 | Scaf1         | ENSMUSG00000038406 | -258  | 0.13 | 0.12 | 0.09 | 0.17 | 0.14 | 0.12 |
| chr7 | 52331924 | 52332158 | Nosip         | ENSMUSG0000003421  | 263   | 0.96 | 0.8  | 0.73 | 0.43 | 0.94 | 0.85 |
| chr7 | 52379281 | 52380174 | Rps11         | ENSMUSG0000003429  | 33    | 0.38 | 0.32 | 0.17 | 0.19 | 0.43 | 0.2  |
| chr7 | 52459793 | 52460129 | Ccdc155       | ENSMUSG00000038292 | 301   | 0.13 | 0.24 | 0.19 | 0.1  | 0.15 | 0.24 |
| chr7 | 52471163 | 52471523 | Tead2         | ENSMUSG00000030796 | 163   | 0.13 | 0.15 | 0.16 | 0.14 | 0.09 | 0.17 |
| chr7 | 52594852 | 52595166 | Ppfia3        | ENSMUSG0000003863  | 1123  | 0.18 | 0.07 | 0.09 | 0.23 | 0.16 | 0.19 |
| chr7 | 52650772 | 52651384 | Snrnp70       | ENSMUSG00000063511 | -16   | 0.2  | 1    | 0.12 | 0.44 | 0.28 | 0.16 |
| chr7 | 52668940 | 52669259 | Ntf5          | ENSMUSG00000074121 | 34    | 0.09 | 0.08 | 0.1  | 0.21 | 0.09 | 0.16 |
| chr7 | 52714945 | 52715491 | Ftl1          | ENSMUSG00000050708 | -9    | 0.12 | 0.26 | 0.11 | 0.18 | 0.16 | 0.11 |
| chr7 | 52781364 | 52781843 | Ppp1r15a      | ENSMUSG00000040435 | -87   | 0.62 | 0.75 | 0.18 | 0.41 | 0.61 | 0.19 |
| chr7 | 52825526 | 52826017 | Bcat2         | ENSMUSG00000030826 | 51    | 0.32 | 0.53 | 0.15 | 0.2  | 0.31 | 0.27 |
| chr7 | 53288966 | 53289464 | Nomo1         | ENSMUSG00000030835 | 149   | 0.19 | 0.14 | 0.1  | 0.13 | 0.22 | 0.15 |
| chr7 | 53632055 | 53632647 | Myod1         | ENSMUSG00000009471 | 507   | 0.24 | 0.16 | 0.11 | 0.18 | 0.21 | 0.14 |
| chr7 | 54174957 | 54175636 | Tsg101        | ENSMUSG00000014402 | 11    | 0.12 | 0.11 | 0.1  | 0.14 | 0.12 | 0.13 |
| chr7 | 54387515 | 54388241 | Ptfn5         | ENSMUSG00000030854 | -182  | 0.68 | 0.72 | 0.23 | 0.47 | 0.67 | 0.35 |
| chr7 | 58766470 | 58766782 | Ano5          | ENSMUSG00000055489 | 227   | 0.17 | NA   | 0.09 | 0.25 | 0.12 | 0.14 |
| chr7 | 63217365 | 63217936 | Nipa2         | ENSMUSG00000030452 | -107  | 0.14 | 0.16 | 0.09 | 0.16 | 0.13 | 0.1  |
| chr7 | 72515286 | 72516148 | Tjp1          | ENSMUSG00000030516 | 184   | 0.09 | 0.1  | 0.14 | 0.19 | 0.09 | 0.16 |
| chr7 | 72789621 | 72790219 | Tarsl2        | ENSMUSG00000030515 | 136   | 0.08 | 0.08 | 0.06 | 0.14 | 0.09 | 0.22 |
| chr7 | 86609553 | 86611271 | Polg          | ENSMUSG00000039176 | 544   | 0.18 | 0.16 | 0.16 | 0.16 | 0.18 | 0.22 |
| chr7 | 86762226 | 86762690 | Rhcg          | ENSMUSG00000030549 | 85    | 0.17 | 0.24 | 0.12 | 0.09 | 0.1  | 0.16 |
| chr7 | 86860315 | 86860786 | Kif7          | ENSMUSG00000050382 | -1478 | 0.16 | 0.19 | 0.13 | 0.22 | 0.15 | 0.13 |

|      |           |           |               |                    |      |      |      |      |      |      |      |
|------|-----------|-----------|---------------|--------------------|------|------|------|------|------|------|------|
| chr7 | 87065322  | 87065686  | Ap3s2         | ENSMUSG00000063801 | 22   | 0.08 | 0.08 | 0.16 | 0.13 | 0.09 | 0.21 |
| chr7 | 87343075  | 87343701  | Sema4b        | ENSMUSG00000030539 | -36  | 0.09 | 0.07 | 0.07 | 0.21 | 0.08 | 0.13 |
| chr7 | 87406018  | 87406404  | Ngrn          | ENSMUSG00000047084 | 110  | 0.2  | 0.13 | 0.11 | 0.25 | 0.21 | 0.18 |
| chr7 | 87484817  | 87485334  | Unc45a        | ENSMUSG00000030533 | -41  | 0.25 | 0.54 | 0.13 | 0.17 | 0.33 | 0.12 |
| chr7 | 87652659  | 87652914  | Gm17257       | ENSMUSG00000091989 | 113  | 1    | 0.95 | 0.78 | NA   | 1    | 0.95 |
| chr7 | 88005947  | 88006207  | Zscan2        | ENSMUSG00000038797 | 238  | 0.25 | 0.14 | 0.1  | 0.28 | 0.18 | 0.12 |
| chr7 | 97591200  | 97592586  | Crebzf        | ENSMUSG00000051451 | 654  | 0.13 | 0.12 | 0.09 | 0.14 | 0.13 | 0.15 |
| chr7 | 99785038  | 99785775  | Ankrd42       | ENSMUSG00000041343 | 139  | 0.14 | 0.09 | 0.12 | 0.09 | 0.16 | 0.11 |
| chr7 | 105984718 | 105984935 | Wnt11         | ENSMUSG00000015957 | 1185 | 0.25 | 0.39 | 0.09 | 0.27 | 0.28 | 0.11 |
| chr7 | 106330906 | 106331581 | Dgat2         | ENSMUSG00000030747 | -20  | 1    | 0.59 | 0.2  | 0.19 | 1    | 0.19 |
| chr7 | 106976632 | 106976960 | Neu3          | ENSMUSG00000035239 | 131  | 0.8  | 1    | 0.41 | 1    | 0.8  | 0.39 |
| chr7 | 107731289 | 107731674 | Mrpl48        | ENSMUSG00000030706 | 108  | 0.14 | 0.25 | 0.23 | 0.07 | 0.1  | 0.14 |
| chr7 | 109044648 | 109044991 | 3200002M19Rik | ENSMUSG00000030649 | -35  | 0.12 | 0.1  | 0.09 | 0.16 | 0.09 | 0.12 |
| chr7 | 109054262 | 109054852 | 2400001E08Rik | ENSMUSG00000030842 | 206  | 0.27 | 0.1  | 0.11 | 0.14 | 0.27 | 0.12 |
| chr7 | 109213636 | 109214317 | Rnf121        | ENSMUSG00000070426 | -304 | 0.27 | 0.49 | 0.07 | 0.13 | 0.28 | 0.11 |
| chr7 | 112574241 | 112574680 | Cckbr         | ENSMUSG00000030898 | 129  | 0.11 | 0.32 | 0.1  | 0.16 | 0.11 | 0.13 |
| chr7 | 112788717 | 112789256 | Arfp2         | ENSMUSG00000030881 | -164 | 0.17 | 0.43 | 0.12 | 0.19 | 0.21 | 0.09 |
| chr7 | 116313042 | 116313644 | Lmo1          | ENSMUSG00000036111 | 479  | 0.16 | 0.11 | 0.15 | 0.18 | 0.16 | 0.12 |
| chr7 | 116662393 | 116663184 | Rpl27a        | ENSMUSG00000046364 | 127  | 0.2  | 0.19 | 0.14 | 0.26 | 0.2  | 0.18 |
| chr7 | 116895565 | 116896124 | Tmem9b        | ENSMUSG00000031021 | -84  | 0.11 | 0.18 | 0.1  | 0.12 | 0.11 | 0.12 |
| chr7 | 117161693 | 117162402 | Ipo7          | ENSMUSG00000066232 | 108  | 0.2  | 0.13 | 0.11 | 0.16 | 0.2  | 0.18 |
| chr7 | 118172179 | 118172919 | Ctr9          | ENSMUSG00000005609 | 84   | 0.09 | 0.06 | 0.1  | 0.11 | 0.08 | 0.1  |
| chr7 | 118923312 | 118923797 | Galnt4        | ENSMUSG00000038296 | -63  | 0.2  | 0.21 | 0.27 | 1    | 0.2  | 0.18 |
| chr7 | 120656853 | 120657785 | Far1          | ENSMUSG00000030759 | -29  | 0.13 | 0.13 | 0.09 | 0.12 | 0.13 | 0.16 |
| chr7 | 123477263 | 123478169 | Rps13         | ENSMUSG00000090862 | -69  | 0.13 | 0.14 | 0.28 | 0.34 | 0.14 | 0.32 |
| chr7 | 125259258 | 125259724 | Rps15a        | ENSMUSG00000008683 | 151  | 0.08 | 1    | 0.14 | 0.18 | 0.15 | 0.11 |
| chr7 | 125727917 | 125728293 | Tmc7          | ENSMUSG00000042246 | 95   | 0.06 | 0.05 | 0.08 | 0.11 | 0.07 | 0.14 |
| chr7 | 129124878 | 129125359 | Cog7          | ENSMUSG00000034951 | 90   | 0.14 | 0.11 | 0.1  | 0.14 | 0.15 | 0.11 |
| chr7 | 130521363 | 130521747 | Lcmt1         | ENSMUSG00000030763 | 59   | 0.28 | 0.38 | 0.17 | 0.18 | 0.23 | 0.16 |
| chr7 | 133225077 | 133225989 | Gsg11         | ENSMUSG00000046182 | 392  | 0.21 | 0.41 | 0.13 | 0.12 | 0.21 | 0.15 |

|      |           |           |          |                    |      |      |      |      |      |      |      |
|------|-----------|-----------|----------|--------------------|------|------|------|------|------|------|------|
| chr7 | 133539893 | 133540367 | Nfatc2ip | ENSMUSG00000030722 | 121  | 0.12 | 0.15 | 0.1  | 0.12 | 0.12 | 0.13 |
| chr7 | 133645504 | 133647335 | Atxn2l   | ENSMUSG00000032637 | -491 | 0.09 | 0.16 | 0.11 | 0.14 | 0.09 | 0.09 |
| chr7 | 133848277 | 133848495 | Coro1a   | ENSMUSG00000030707 | -56  | 0.24 | 0.15 | 0.1  | 0.11 | 0.22 | 0.09 |
| chr7 | 134160622 | 134160989 | Gm20418  | ENSMUSG00000092534 | -807 | 1    | NA   | NA   | NA   | 1    | NA   |
| chr7 | 134168866 | 134169135 | Maz      | ENSMUSG00000030678 | 993  | 0.13 | 0.11 | 0.07 | 0.21 | 0.11 | 0.12 |
| chr7 | 134376594 | 134377022 | Zfp553   | ENSMUSG00000045598 | 39   | 0.1  | 0.13 | 0.07 | 0.12 | 0.09 | 0.13 |
| chr7 | 134417012 | 134417589 | Sephs2   | ENSMUSG00000049091 | 133  | 0.14 | 0.3  | 0.12 | 0.12 | 0.14 | 0.18 |
| chr7 | 134507184 | 134507422 | Gm10586  | ENSMUSG00000073823 | 361  | 0.5  | NA   | 0.09 | 0.29 | 0.5  | 0.2  |
| chr7 | 134565298 | 134565663 | Zfp688   | ENSMUSG00000045251 | -116 | 0.12 | 0.09 | 0.09 | 0.17 | 0.11 | 0.23 |
| chr7 | 134614448 | 134614769 | Prr14    | ENSMUSG00000030822 | 75   | 0.19 | 0.1  | 0.15 | 0.17 | 0.2  | 0.26 |
| chr7 | 134615183 | 134615555 | Prr14    | ENSMUSG00000030822 | -46  | 0.17 | 0.29 | 0.13 | 0.18 | 0.1  | 0.12 |
| chr7 | 135754896 | 135755354 | Inpp5f   | ENSMUSG00000042105 | 251  | 0.47 | 0.38 | 0.06 | 0.13 | 0.47 | 0.12 |
| chr7 | 138009147 | 138010138 | Plekha1  | ENSMUSG00000040268 | 372  | 0.18 | 0.15 | 0.09 | 0.12 | 0.18 | 0.14 |
| chr7 | 138553601 | 138554327 | Ikzf5    | ENSMUSG00000040167 | -72  | 0.2  | 0.07 | 0.1  | 0.08 | 0.15 | 0.14 |
| chr7 | 139788860 | 139789496 | Gm16764  | ENSMUSG00000087657 | 108  | 0.07 | 0.07 | 0.17 | 0.13 | 0.07 | 0.22 |
| chr7 | 139791085 | 139791609 | Nkx1-2   | ENSMUSG00000048528 | -27  | 0.06 | NA   | 0.13 | 0.2  | 0.1  | 0.06 |
| chr7 | 147136687 | 147136904 | Gm16201  | ENSMUSG00000086742 | 456  | 0.18 | 0.5  | 0.22 | 0.19 | 0.18 | 0.18 |
| chr7 | 147222063 | 147222860 | Tubgcp2  | ENSMUSG00000025474 | -212 | 0.2  | 0.3  | 0.12 | 0.14 | 0.2  | 0.12 |
| chr7 | 148358485 | 148358768 | Rnh1     | ENSMUSG00000038650 | 124  | 0.33 | 0.14 | 0.08 | 0.18 | 0.25 | 0.24 |
| chr7 | 148477832 | 148478280 | Drd4     | ENSMUSG00000025496 | 127  | 0.13 | 0.17 | 0.1  | 0.21 | 0.12 | 0.11 |
| chr7 | 148623220 | 148623604 | Slc25a22 | ENSMUSG00000019082 | 79   | 0.5  | 0.95 | 0.15 | 0.61 | 0.46 | 0.29 |
| chr7 | 148647671 | 148648140 | Efcab4a  | ENSMUSG00000048200 | 111  | 0.29 | 0.92 | 0.07 | 0.22 | 0.33 | 0.15 |
| chr7 | 150238579 | 150239193 | Cd81     | ENSMUSG00000037706 | 242  | 0.11 | 0.11 | 0.09 | 0.16 | 0.1  | 0.15 |
| chr7 | 150292933 | 150293670 | Kcnq1    | ENSMUSG00000009545 | 142  | 0.44 | 0.25 | 0.12 | 0.24 | 0.44 | 0.16 |
| chr7 | 151361369 | 151361804 | Shank2   | ENSMUSG00000037541 | 161  | 0.25 | 0.43 | 0.12 | 0.29 | 0.27 | 0.16 |
| chr7 | 151767983 | 151768503 | Fadd     | ENSMUSG00000031077 | 125  | 0.1  | 0.07 | 0.08 | 0.17 | 0.1  | 0.13 |
| chr7 | 3303669   | 3303943   | Prkcc    | ENSMUSG00000078816 | 35   | NA   | 0.75 | 0.33 | 1    | NA   | NA   |
| chr7 | 3568900   | 3569136   | Ndufa3   | ENSMUSG00000035674 | 43   | 0.33 | 1    | 0.2  | 0.27 | NA   | 0.32 |
| chr7 | 4100775   | 4101348   | Leng9    | ENSMUSG00000043432 | 413  | NA   | 1    | 0.5  | 1    | NA   | 1    |
| chr7 | 4965937   | 4966540   | Fiz1     | ENSMUSG00000061374 | 61   | NA   | 1    | 0.23 | 0.33 | NA   | 0.23 |

|      |          |          |               |                     |       |      |      |      |      |      |      |
|------|----------|----------|---------------|---------------------|-------|------|------|------|------|------|------|
| chr7 | 5008310  | 5008833  | Ccdc106       | ENSMUSG00000035228  | 244   | 0.6  | 0.5  | 0.1  | 0.2  | NA   | 0.05 |
| chr7 | 5011890  | 5012274  | U2af2         | ENSMUSG00000030435  | -1663 | NA   | 0.22 | 0.09 | 0.08 | NA   | 0.14 |
| chr7 | 6282684  | 6283075  | Zfp583        | ENSMUSG00000030443  | -73   | NA   | NA   | 0.31 | 0.37 | NA   | 0.29 |
| chr7 | 6649068  | 6649353  | Zim1          | ENSMUSG00000002266  | -49   | NA   | 0.08 | 0.16 | 0.5  | 0.06 | 0.28 |
| chr7 | 13507081 | 13507908 | Rps5          | ENSMUSG00000012848  | -145  | NA   | NA   | 0.1  | 0.21 | 0.1  | 0.14 |
| chr7 | 13551116 | 13551647 | Zfp324        | ENSMUSG00000004500  | 194   | NA   | 0.5  | 0.2  | 0.18 | NA   | 0.09 |
| chr7 | 16531100 | 16531514 | Gltscr2       | ENSMUSG000000041560 | 150   | NA   | 0.09 | 0.16 | 0.25 | 0.07 | 0.21 |
| chr7 | 16705289 | 16705557 | Kptn          | ENSMUSG00000006021  | 145   | 0.33 | 1    | 0.22 | 0.2  | NA   | 0.14 |
| chr7 | 16859464 | 16859755 | Prr24         | ENSMUSG000000091811 | -568  | NA   | NA   | 0.13 | 0.14 | NA   | 0.2  |
| chr7 | 17367292 | 17367733 | Slc1a5        | ENSMUSG00000001918  | 756   | NA   | NA   | 0.19 | NA   | 0.1  | 0.23 |
| chr7 | 17492337 | 17492627 | Ptgir         | ENSMUSG000000043017 | 619   | NA   | NA   | 1    | NA   | NA   | NA   |
| chr7 | 19495529 | 19495870 | Ccdc61        | ENSMUSG000000074358 | 39    | NA   | 0.08 | 0.09 | 0.31 | 0.05 | 0.18 |
| chr7 | 19511436 | 19511729 | Nova2         | ENSMUSG000000030411 | 345   | NA   | NA   | 0.29 | 0.32 | 0.29 | 0.08 |
| chr7 | 19576372 | 19576717 | Mypop         | ENSMUSG000000048481 | -50   | NA   | NA   | 0.16 | 0.11 | NA   | 0.15 |
| chr7 | 19679452 | 19679693 | Six5          | ENSMUSG000000040841 | -371  | NA   | 0.4  | 0.09 | 0.33 | 0.12 | 0.2  |
| chr7 | 19716929 | 19717151 | Fbxo46        | ENSMUSG000000050428 | -2    | NA   | NA   | 0.25 | 1    | 1    | 0.12 |
| chr7 | 19764612 | 19765215 | Eml2          | ENSMUSG000000040811 | -1595 | NA   | 1    | 0.4  | NA   | NA   | 0.16 |
| chr7 | 19945474 | 19945698 | Ppp1r13l      | ENSMUSG000000040734 | -409  | NA   | NA   | NA   | NA   | 0.5  | NA   |
| chr7 | 19946423 | 19946716 | Ppp1r13l      | ENSMUSG000000040734 | 4     | NA   | NA   | 0.1  | 0.21 | 0.07 | 0.1  |
| chr7 | 19967161 | 19967737 | Erc2          | ENSMUSG000000030400 | 90    | NA   | 0.24 | 0.13 | 0.16 | 0.33 | 0.15 |
| chr7 | 25084148 | 25084451 | Zfp61         | ENSMUSG000000050605 | 18    | NA   | 0.06 | 0.12 | 0.11 | 0.5  | 0.09 |
| chr7 | 25184376 | 25185076 | 1500002020Rik | ENSMUSG000000002210 | 88    | 1    | 0.04 | 0.17 | 0.11 | NA   | 0.18 |
| chr7 | 25372477 | 25372698 | Ethe1         | ENSMUSG000000064254 | 25    | NA   | NA   | NA   | NA   | NA   | 0.29 |
| chr7 | 25396091 | 25396427 | Phldb3        | ENSMUSG000000074277 | -88   | NA   | NA   | 0.21 | 0.09 | 0.5  | 0.1  |
| chr7 | 25857803 | 25858026 | Grik5         | ENSMUSG00000003378  | -526  | 0.57 | 0.19 | 0.06 | 0.15 | NA   | 0.12 |
| chr7 | 26006186 | 26006402 | Zfp526        | ENSMUSG000000046541 | -176  | NA   | 1    | 0.17 | 0.25 | 0.15 | NA   |
| chr7 | 26066812 | 26067082 | Cic           | ENSMUSG00000005442  | -251  | NA   | 0.17 | 0.11 | 1    | NA   | 0.33 |
| chr7 | 26082375 | 26082794 | Pafah1b3      | ENSMUSG00000005447  | -253  | 0.5  | 0.11 | 0.21 | 0.13 | NA   | 0.21 |
| chr7 | 26091047 | 26091343 | Tmem145       | ENSMUSG000000043843 | 70    | NA   | 0.35 | 0.09 | 0.25 | 0.4  | 0.16 |
| chr7 | 28181399 | 28181623 | Spnb4         | ENSMUSG000000011751 | 61    | NA   | NA   | 0.11 | 0.17 | 0.12 | 0.28 |

|      |          |          |               |                     |      |      |      |      |      |      |      |
|------|----------|----------|---------------|---------------------|------|------|------|------|------|------|------|
| chr7 | 28258589 | 28258978 | Sertad3       | ENSMUSG00000055200  | -4   | NA   | 0.11 | 0.13 | 0.16 | NA   | 0.22 |
| chr7 | 28337994 | 28338445 | Plid3         | ENSMUSG00000003363  | -184 | NA   | 0.05 | 0.24 | 0.36 | 0.03 | 0.22 |
| chr7 | 28376734 | 28377180 | Akt2          | ENSMUSG00000004056  | 192  | NA   | NA   | 0.14 | 0.25 | 0.25 | 0.41 |
| chr7 | 28516332 | 28516648 | Zfp60         | ENSMUSG000000037640 | 82   | NA   | NA   | 0.15 | 0.15 | 0.07 | 0.18 |
| chr7 | 28714235 | 28714590 | 1700049G17Rik | ENSMUSG000000070709 | 37   | NA   | NA   | 0.24 | 0.17 | 0.5  | 0.25 |
| chr7 | 28835048 | 28835359 | Psmc4         | ENSMUSG000000030603 | -128 | NA   | NA   | 0.18 | 0.12 | NA   | 0.1  |
| chr7 | 29163951 | 29164367 | Zfp36         | ENSMUSG000000044786 | 115  | 0.43 | 0.5  | 0.22 | 0.39 | NA   | 0.2  |
| chr7 | 29177366 | 29178439 | Med29         | ENSMUSG00000003444  | -175 | NA   | 0.7  | 0.19 | 0.21 | 0.36 | 0.22 |
| chr7 | 29527041 | 29527316 | Sars2         | ENSMUSG000000070699 | 168  | NA   | 0.12 | 0.09 | 0.18 | 0.07 | 0.11 |
| chr7 | 29593841 | 29594237 | Hnrnp1        | ENSMUSG000000015165 | 212  | NA   | NA   | 0.16 | 0.24 | NA   | 0.12 |
| chr7 | 29596276 | 29596626 | Hnrnp1        | ENSMUSG000000015165 | 492  | NA   | NA   | 1    | NA   | NA   | NA   |
| chr7 | 29610243 | 29610496 | Ech1          | ENSMUSG000000053898 | 1    | NA   | 1    | NA   | NA   | NA   | NA   |
| chr7 | 30644958 | 30645181 | Zfp420        | ENSMUSG000000058402 | 71   | NA   | NA   | 0.08 | 0.36 | NA   | 0.24 |
| chr7 | 31338264 | 31338536 | Hspb6         | ENSMUSG000000036854 | 113  | NA   | 1    | 0.55 | NA   | NA   | 0.62 |
| chr7 | 31449852 | 31450119 | Haus5         | ENSMUSG000000078762 | -33  | NA   | 0.8  | 0.22 | 0.29 | 0.08 | 0.31 |
| chr7 | 31910101 | 31910311 | Scn1b         | ENSMUSG000000019194 | 1758 | NA   | 1    | 0.25 | 0.6  | 0.32 | NA   |
| chr7 | 38557722 | 38557957 | Zfp536        | ENSMUSG000000043456 | 55   | NA   | 0.05 | 0.07 | 0.11 | 0.09 | 0.07 |
| chr7 | 46844002 | 46844235 | Gm2058        | ENSMUSG000000074903 | -183 | NA   | NA   | 0.1  | 0.1  | NA   | 0.07 |
| chr7 | 48854549 | 48854815 | 2610021A01Rik | ENSMUSG000000091474 | 51   | 0.5  | 0.2  | NA   | 1    | NA   | 0.34 |
| chr7 | 49760706 | 49761200 | Zfp141        | ENSMUSG000000092416 | 143  | NA   | NA   | 0.08 | 0.29 | NA   | 0.2  |
| chr7 | 50699324 | 50699566 | Etfb          | ENSMUSG000000004610 | -33  | NA   | 0.04 | 0.09 | 0.2  | 0.05 | 0.13 |
| chr7 | 50817525 | 50817758 | Zfp658        | ENSMUSG000000056592 | 15   | NA   | 0.25 | 0.16 | 0.12 | 0.33 | 0.07 |
| chr7 | 51052732 | 51052999 | Klk8          | ENSMUSG000000064023 | -82  | NA   | NA   | 0.25 | 0.32 | NA   | 0.33 |
| chr7 | 51844545 | 51844749 | Gm15396       | ENSMUSG000000087560 | 1347 | NA   | NA   | 0.13 | 1    | NA   | 0.18 |
| chr7 | 51926136 | 51926423 | Myh14         | ENSMUSG000000030739 | -66  | NA   | NA   | 0.06 | 1    | NA   | 0.1  |
| chr7 | 52104405 | 52105851 | Tbc1d17       | ENSMUSG000000038520 | -683 | NA   | NA   | 0.29 | NA   | NA   | 0.44 |
| chr7 | 52252838 | 52253361 | Bcl2l12       | ENSMUSG000000003190 | -184 | NA   | NA   | 0.2  | NA   | 1    | 0.22 |
| chr7 | 52317678 | 52317931 | Prrg2         | ENSMUSG000000007837 | -31  | NA   | 0.16 | 0.14 | 0.23 | 0.15 | 0.11 |
| chr7 | 52383887 | 52384760 | Rpl13a        | ENSMUSG000000074129 | -304 | NA   | 0.18 | 0.15 | 0.24 | 0.07 | 0.24 |
| chr7 | 52690110 | 52690628 | Gys1          | ENSMUSG000000003865 | 155  | NA   | 0.07 | 0.06 | 0.16 | 0.18 | 0.27 |

|      |           |           |               |                    |       |      |      |      |      |      |      |
|------|-----------|-----------|---------------|--------------------|-------|------|------|------|------|------|------|
| chr7 | 52743951  | 52744258  | Dhdh          | ENSMUSG00000011382 | 71    | NA   | NA   | 1    | NA   | NA   | NA   |
| chr7 | 52894078  | 52894323  | Mamstr        | ENSMUSG00000042918 | -1147 | NA   | 0.33 | 0.06 | 0.21 | 0.33 | 0.18 |
| chr7 | 52949372  | 52949717  | Sec1          | ENSMUSG00000040364 | 228   | NA   | 0.92 | 0.93 | 1    | 1    | 0.97 |
| chr7 | 53356045  | 53356253  | Kcnj11        | ENSMUSG00000070561 | -542  | NA   | NA   | 0.2  | NA   | NA   | NA   |
| chr7 | 54213706  | 54214139  | Uevld         | ENSMUSG00000043262 | -80   | NA   | NA   | 0.18 | 0.24 | NA   | 0.11 |
| chr7 | 59261049  | 59261321  | Svip          | ENSMUSG00000074093 | 203   | 0.16 | NA   | 0.09 | 0.11 | NA   | 0.06 |
| chr7 | 69493139  | 69493630  | Ndn           | ENSMUSG00000033585 | 221   | NA   | NA   | 0.44 | NA   | 0.83 | 0.31 |
| chr7 | 72017467  | 72018022  | Ndnl2         | ENSMUSG00000070520 | 139   | 0.33 | 0.06 | 0.07 | 0.11 | NA   | 0.12 |
| chr7 | 72301517  | 72301830  | Fam189a1      | ENSMUSG00000030518 | -217  | NA   | 0.2  | 0.1  | 0.15 | 0.13 | 0.14 |
| chr7 | 73834608  | 73835178  | Lins          | ENSMUSG00000053091 | 118   | NA   | 0.32 | 0.15 | 0.15 | 0.07 | 0.17 |
| chr7 | 74948546  | 74948755  | 4833412C05Rik | ENSMUSG00000085850 | -268  | NA   | 0.25 | 0.11 | 0.15 | 0.15 | 0.09 |
| chr7 | 82453729  | 82453939  | 1500012K07Rik | ENSMUSG00000086403 | 246   | NA   | NA   | 0.29 | NA   | NA   | 0.1  |
| chr7 | 85927734  | 85928014  | Mrpl46        | ENSMUSG00000030612 | 78    | NA   | 0.04 | 0.11 | 0.08 | 0.04 | 0.09 |
| chr7 | 87331586  | 87331945  | Sema4b        | ENSMUSG00000030539 | 38    | NA   | 0.16 | 0.05 | 0.16 | 0.08 | 0.07 |
| chr7 | 87391103  | 87391504  | Tlll13        | ENSMUSG00000045467 | 41    | 1    | 0.13 | 0.08 | 0.12 | NA   | 0.26 |
| chr7 | 87468984  | 87469251  | Rccd1         | ENSMUSG00000038930 | -111  | NA   | 0.5  | 0.08 | 0.5  | NA   | 0.11 |
| chr7 | 87679555  | 87680022  | Blm           | ENSMUSG00000030528 | 96    | NA   | 0.07 | 0.19 | 0.21 | 0.06 | 0.18 |
| chr7 | 95426513  | 95426785  | Ctsc          | ENSMUSG00000030560 | 54    | 0.12 | 0.12 | 0.08 | 0.13 | NA   | 0.11 |
| chr7 | 96487092  | 96487446  | Tmem135       | ENSMUSG00000039428 | -22   | NA   | 0.2  | 0.1  | 0.1  | 0.07 | 0.21 |
| chr7 | 96781318  | 96781687  | Me3           | ENSMUSG00000030621 | 106   | NA   | 1    | 0.12 | 0.1  | 0.2  | 0.11 |
| chr7 | 97089336  | 97089571  | I7Rn6         | ENSMUSG00000062797 | 123   | NA   | NA   | 0.1  | 0.14 | 0.17 | 0.14 |
| chr7 | 99709581  | 99709807  | Ccdc90b       | ENSMUSG00000030613 | 35    | 1    | NA   | NA   | 1    | NA   | NA   |
| chr7 | 99817657  | 99817866  | Pcf11         | ENSMUSG00000041328 | 682   | NA   | NA   | NA   | NA   | NA   | 0.39 |
| chr7 | 104727842 | 104728747 | 1810020D17Rik | ENSMUSG00000035642 | -402  | NA   | 0.18 | 0.1  | 0.13 | 0.2  | 0.12 |
| chr7 | 107641763 | 107642003 | Ucp2          | ENSMUSG00000033685 | 37    | NA   | NA   | 0.15 | 0.11 | 0.37 | 0.24 |
| chr7 | 107685483 | 107685755 | Chchd8        | ENSMUSG00000044881 | 5     | NA   | NA   | 0.1  | 0.19 | NA   | 0.26 |
| chr7 | 108160225 | 108160805 | P2ry2         | ENSMUSG00000032860 | -10   | 0.25 | 0.11 | 0.2  | 0.17 | NA   | 0.23 |
| chr7 | 109118581 | 109119127 | Numa1         | ENSMUSG00000066306 | 497   | NA   | NA   | 0.1  | 0.14 | 0.38 | 0.22 |
| chr7 | 109398269 | 109398550 | Rhog          | ENSMUSG00000073982 | 193   | NA   | 0.11 | 0.09 | 0.12 | 0.05 | 0.17 |
| chr7 | 109399179 | 109399440 | Rhog          | ENSMUSG00000073982 | -672  | NA   | NA   | 0.22 | NA   | NA   | 0.33 |

|      |           |           |               |                    |      |    |      |      |      |      |      |
|------|-----------|-----------|---------------|--------------------|------|----|------|------|------|------|------|
| chr7 | 109590126 | 109590616 | Rrm1          | ENSMUSG00000030978 | 162  | NA | 0.23 | 0.22 | 0.35 | 0.34 | 0.2  |
| chr7 | 116846972 | 116847559 | D930014E17Rik | ENSMUSG00000031023 | 61   | NA | 0.1  | 0.09 | 0.17 | 0.4  | 0.15 |
| chr7 | 117987564 | 117987997 | Rnf141        | ENSMUSG00000030788 | -140 | NA | 1    | 0.44 | 1    | 0.29 | 0.3  |
| chr7 | 119301807 | 119302025 | Dkk3          | ENSMUSG00000030772 | 655  | NA | 0.2  | 0.11 | 0.26 | 0.27 | 0.29 |
| chr7 | 119571291 | 119571958 | Parva         | ENSMUSG00000030770 | 205  | NA | 0.15 | 0.15 | 0.11 | 0.21 | 0.12 |
| chr7 | 121419283 | 121419792 | Psma1         | ENSMUSG00000030751 | 3    | NA | 0.42 | 0.2  | 0.29 | 0.37 | 0.17 |
| chr7 | 122070654 | 122071296 | Gm6816        | ENSMUSG00000046411 | 265  | 1  | 1    | 0.94 | NA   | NA   | 1    |
| chr7 | 125272823 | 125273327 | Arl6ip1       | ENSMUSG00000030654 | 64   | NA | 0.2  | 0.17 | 0.2  | 0.15 | 0.19 |
| chr7 | 126327825 | 126328268 | Gpr139        | ENSMUSG00000066197 | -158 | NA | 0.12 | 0.07 | 0.11 | 0.1  | 0.22 |
| chr7 | 127245726 | 127246210 | Tmem159       | ENSMUSG00000030917 | 78   | NA | NA   | 0.09 | 0.24 | NA   | 0.09 |
| chr7 | 129164240 | 129164491 | Gga2          | ENSMUSG00000030872 | 316  | NA | NA   | 0.3  | NA   | 1    | NA   |
| chr7 | 130643802 | 130644399 | Zkscan2       | ENSMUSG00000030757 | -137 | NA | NA   | 1    | NA   | NA   | NA   |
| chr7 | 133520516 | 133521056 | Spns1         | ENSMUSG00000030741 | -65  | NA | 0.22 | 0.14 | 0.13 | 0.13 | 0.14 |
| chr7 | 134093215 | 134093521 | Asphd1        | ENSMUSG00000046378 | -272 | NA | 0.34 | 0.29 | 0.58 | 0.19 | 0.43 |
| chr7 | 134164730 | 134164945 | Prrt2         | ENSMUSG00000045114 | -112 | NA | NA   | 0.07 | 0.18 | 0.08 | 0.09 |
| chr7 | 134170677 | 134171055 | Maz           | ENSMUSG00000030678 | -333 | 1  | NA   | 0.5  | 0.5  | NA   | NA   |
| chr7 | 134404012 | 134404299 | Dctpp1        | ENSMUSG00000042462 | 68   | NA | 0.5  | 0.16 | 0.12 | 0.17 | 0.16 |
| chr7 | 134518993 | 134519568 | Zfp747        | ENSMUSG00000054381 | 284  | NA | 0.28 | 0.09 | 0.11 | NA   | 0.14 |
| chr7 | 134536605 | 134537022 | E430018J23Rik | ENSMUSG00000078580 | 320  | NA | 0.33 | 0.15 | 0.14 | 0.17 | 0.13 |
| chr7 | 134549845 | 134550194 | Zfp764        | ENSMUSG00000045757 | 278  | NA | NA   | 0.06 | 0.18 | 0.16 | 0.07 |
| chr7 | 134967777 | 134968064 | Stx4a         | ENSMUSG00000030805 | 112  | NA | NA   | 0.33 | NA   | NA   | NA   |
| chr7 | 135047578 | 135047785 | Bckdk         | ENSMUSG00000030802 | 85   | NA | 0.08 | 0.13 | 0.23 | 0.5  | 0.1  |
| chr7 | 135078920 | 135079508 | Prss36        | ENSMUSG00000070371 | -271 | NA | 0.39 | 0.13 | 0.5  | 0.33 | 0.39 |
| chr7 | 135603744 | 135604108 | Tial1         | ENSMUSG00000030846 | 797  | NA | NA   | 0.25 | NA   | NA   | 0.33 |
| chr7 | 140044060 | 140044347 | Mettl10       | ENSMUSG00000030960 | -141 | NA | 0.5  | 0.11 | NA   | NA   | 0.46 |
| chr7 | 144086075 | 144086288 | Mgmt          | ENSMUSG00000054612 | -113 | NA | NA   | 0.21 | 1    | NA   | NA   |
| chr7 | 146398854 | 146399384 | Lrrc27        | ENSMUSG00000015980 | 232  | NA | 0.18 | 0.21 | 0.21 | NA   | 0.21 |
| chr7 | 147302165 | 147302455 | Echs1         | ENSMUSG00000025465 | -22  | 1  | NA   | 0.11 | 0.08 | NA   | 0.06 |
| chr7 | 148354424 | 148354646 | Rnh1          | ENSMUSG00000038650 | 300  | NA | NA   | 0.49 | 1    | 0.25 | 0.33 |
| chr7 | 148599890 | 148600102 | Pddc1         | ENSMUSG00000051007 | -32  | NA | NA   | 0.33 | NA   | NA   | 0.17 |



|      |           |           |          |                    |      |      |      |      |      |      |      |
|------|-----------|-----------|----------|--------------------|------|------|------|------|------|------|------|
| chr7 | 148650621 | 148650988 | Efcab4a  | ENSMUSG00000048200 | -189 | 0.44 | 1    | 0.25 | 0.38 | NA   | 0.35 |
| chr7 | 149135214 | 149135517 | Brsk2    | ENSMUSG00000053046 | -291 | NA   | 0.2  | 0.17 | 0.11 | NA   | 0.2  |
| chr7 | 150255673 | 150255954 | Tssc4    | ENSMUSG00000045752 | 364  | NA   | NA   | NA   | NA   | NA   | 0.25 |
| chr7 | 151008709 | 151009011 | Nadsyn1  | ENSMUSG00000031090 | -150 | NA   | NA   | 0.13 | 0.18 | 0.38 | 0.26 |
| chr7 | 151015902 | 151016265 | Dhcr7    | ENSMUSG00000058454 | 101  | NA   | 0.08 | 0.12 | 1    | NA   | 0.17 |
| chr7 | 151470565 | 151470772 | Shank2   | ENSMUSG00000037541 | 324  | NA   | 0.12 | 0.18 | 0.21 | 0.27 | 0.16 |
| chr7 | 152081655 | 152081951 | Fgf15    | ENSMUSG00000031073 | -634 | NA   | 0.06 | 0.07 | 0.16 | 0.06 | 0.14 |
| chr8 | 87185822  | 87186766  | Ier2     | ENSMUSG00000053560 | 457  | 0.09 | 0.25 | 0.12 | 0.17 | 0.31 | 0.16 |
| chr8 | 77517451  | 77518285  | Hmgxb4   | ENSMUSG00000034518 | 290  | 0.06 | 0.1  | 0.1  | 0.11 | 0.16 | 0.15 |
| chr8 | 107064639 | 107065216 | Car7     | ENSMUSG00000031883 | 220  | 0.7  | 0.25 | 0.09 | 0.15 | 0.24 | 0.13 |
| chr8 | 35039838  | 35040982  | Rbpms    | ENSMUSG00000031586 | -132 | 0.07 | 0.12 | 0.13 | 0.15 | 0.21 | 0.19 |
| chr8 | 87436436  | 87437345  | Dnase2a  | ENSMUSG0000003812  | -400 | 0.89 | 0.8  | 0.3  | 0.76 | 0.47 | 0.56 |
| chr8 | 127420197 | 127420402 | Exoc8    | ENSMUSG00000074030 | 1306 | 0.04 | 0.07 | 0.32 | 0.31 | 0.65 | 0.55 |
| chr8 | 107057990 | 107058609 | Nae1     | ENSMUSG00000031878 | 189  | 0.2  | 0.23 | 0.18 | 0.2  | 0.66 | 0.21 |
| chr8 | 72735702  | 72736734  | Slc25a42 | ENSMUSG00000002346 | -14  | 0.05 | 0.18 | 0.09 | 0.17 | 0.22 | 0.16 |
| chr8 | 114060102 | 114061529 | Znrf1    | ENSMUSG00000033545 | 275  | 0.08 | 0.19 | 0.09 | 0.14 | 0.18 | 0.12 |
| chr8 | 11727435  | 11728835  | Arhgef7  | ENSMUSG00000031511 | 30   | 0.08 | 0.14 | 0.09 | 0.11 | 0.16 | 0.13 |
| chr8 | 26311226  | 26312272  | Tacc1    | ENSMUSG00000065954 | 172  | 0.08 | 0.07 | 0.09 | 0.15 | 0.27 | 0.18 |
| chr8 | 28370759  | 28371221  | Eif4ebp1 | ENSMUSG00000031490 | 191  | 0.07 | 0.11 | 0.1  | 0.14 | 0.23 | 0.11 |
| chr8 | 107694668 | 107695673 | Cbfb     | ENSMUSG00000031885 | 596  | 0.12 | 0.15 | 0.11 | 0.15 | 0.23 | 0.18 |
| chr8 | 126001494 | 126002120 | Afg3l1   | ENSMUSG00000031967 | 4    | 0.09 | 0.17 | 0.07 | 0.1  | 0.32 | 0.17 |
| chr8 | 108583563 | 108584115 | Nfatc3   | ENSMUSG00000031902 | 48   | 0.05 | 0.08 | 0.1  | 0.15 | 0.15 | 0.14 |
| chr8 | 40068834  | 40069417  | Tusc3    | ENSMUSG00000039530 | 226  | 0.14 | 0.13 | 0.12 | 0.09 | 0.6  | 0.15 |
| chr8 | 70585972  | 70586596  | Psd3     | ENSMUSG00000030465 | -99  | 0.18 | 0.08 | 0.09 | 0.07 | 0.06 | 0.11 |
| chr8 | 74684515  | 74685561  | Gm16091  | ENSMUSG00000087502 | -284 | 0.2  | 0.23 | 0.1  | 0.16 | 0.38 | 0.17 |
| chr8 | 47085101  | 47085721  | Ankrd37  | ENSMUSG00000050914 | -208 | 1    | 0.39 | 0.08 | 0.21 | 0.43 | 0.08 |
| chr8 | 93431706  | 93433346  | Gm6658   | ENSMUSG00000074171 | -212 | 0.09 | 0.12 | 0.11 | 0.12 | 0.17 | 0.14 |
| chr8 | 106918953 | 106919577 | Cmtm4    | ENSMUSG00000051578 | 331  | 0.07 | 0.12 | 0.12 | 0.12 | 0.16 | 0.15 |
| chr8 | 124276898 | 124277639 | Jph3     | ENSMUSG00000025318 | -108 | 0.93 | 0.9  | 0.6  | 0.67 | 0.76 | 0.67 |
| chr8 | 87225456  | 87225799  | Lyl1     | ENSMUSG00000034041 | 271  | 0.13 | 0.14 | 0.52 | 0.55 | 0.28 | 0.47 |

|      |           |           |           |                     |      |      |      |      |      |      |      |
|------|-----------|-----------|-----------|---------------------|------|------|------|------|------|------|------|
| chr8 | 87460919  | 87461385  | Mast1     | ENSMUSG00000053693  | 91   | 0.39 | 0.07 | 0.1  | 0.2  | 0.11 | 0.16 |
| chr8 | 98201419  | 98202493  | Ndrp4     | ENSMUSG00000036564  | -29  | 0.1  | 0.11 | 0.09 | 0.12 | 0.21 | 0.16 |
| chr8 | 4258389   | 4259352   | Cttn1     | ENSMUSG00000048644  | 404  | 0.09 | 0.32 | 0.1  | 0.11 | 0.24 | 0.16 |
| chr8 | 108159830 | 108161498 | Ctcf      | ENSMUSG00000005698  | 196  | 0.06 | 0.1  | 0.08 | 0.12 | 0.11 | 0.11 |
| chr8 | 74225349  | 74225662  | B3gnt3    | ENSMUSG00000031803  | 183  | 0.26 | 0.52 | 0.21 | 0.26 | 0.48 | 0.3  |
| chr8 | 109963136 | 109963439 | Rps26-ps1 | ENSMUSG00000059775  | 176  | 0.85 | 0.83 | 0.89 | 0.76 | 0.98 | 0.94 |
| chr8 | 109674413 | 109674911 | Cyb5b     | ENSMUSG00000031924  | 101  | 0.08 | 0.11 | 0.11 | 0.17 | 0.19 | 0.12 |
| chr8 | 86760653  | 86761328  | Zswim4    | ENSMUSG00000035671  | -36  | 0.11 | 0.27 | 0.13 | 0.16 | 0.27 | 0.13 |
| chr8 | 34709965  | 34710700  | Ppp2cb    | ENSMUSG00000009630  | 239  | 0.07 | 0.24 | 0.11 | 0.14 | 0.23 | 0.14 |
| chr8 | 127044534 | 127044936 | Cog2      | ENSMUSG00000031979  | 68   | 0.06 | 0.11 | 0.15 | 0.2  | 0.2  | 0.16 |
| chr8 | 28087116  | 28090397  | Zfp703    | ENSMUSG000000085795 | 948  | 0.14 | 0.14 | 0.24 | 0.26 | 0.2  | 0.2  |
| chr8 | 80041179  | 80042348  | Arhgap10  | ENSMUSG00000037148  | 43   | 0.1  | 0.22 | 0.15 | 0.26 | 0.24 | 0.15 |
| chr8 | 13338534  | 13339396  | Tfdp1     | ENSMUSG00000038482  | 214  | 0.07 | 0.09 | 0.09 | 0.1  | 0.15 | 0.14 |
| chr8 | 18594998  | 18595623  | Mcp1      | ENSMUSG00000039842  | 179  | 0.09 | 0.17 | 0.14 | 0.19 | 0.27 | 0.2  |
| chr8 | 108282121 | 108282624 | Gfod2     | ENSMUSG00000013150  | 124  | 0.31 | 0.14 | 0.1  | 0.13 | 0.09 | 0.13 |
| chr8 | 128434312 | 128435293 | BC021891  | ENSMUSG00000031853  | 452  | 0.07 | 0.07 | 0.1  | 0.14 | 0.13 | 0.11 |
| chr8 | 124967305 | 124967753 | Mvd       | ENSMUSG00000006517  | -207 | 0.35 | 0.12 | 0.11 | 0.18 | 0.1  | 0.11 |
| chr8 | 74658955  | 74659738  | Tpm4      | ENSMUSG00000031799  | 188  | 0.73 | 0.47 | 0.27 | 0.31 | 0.38 | 0.31 |
| chr8 | 112229240 | 112229843 | Zfp821    | ENSMUSG00000031728  | 92   | 0.08 | 0.13 | 0.12 | 0.13 | 0.16 | 0.15 |
| chr8 | 73292351  | 73292801  | Pik3r2    | ENSMUSG00000031834  | 711  | 0.82 | 0.83 | 0.85 | 0.81 | 0.94 | 0.93 |
| chr8 | 114457241 | 114457710 | Tmem231   | ENSMUSG00000031951  | 216  | 0.08 | 0.15 | 0.09 | 0.15 | 0.19 | 0.14 |
| chr8 | 81922254  | 81923481  | Smad1     | ENSMUSG00000031681  | 550  | 0.08 | 0.13 | 0.09 | 0.15 | 0.16 | 0.13 |
| chr8 | 107782895 | 107783838 | Tradd     | ENSMUSG00000031887  | 654  | 0.09 | 0.21 | 0.12 | 0.3  | 0.2  | 0.17 |
| chr8 | 82162904  | 82164192  | Otud4     | ENSMUSG00000036990  | 31   | 0.1  | 0.22 | 0.09 | 0.12 | 0.19 | 0.18 |
| chr8 | 97125004  | 97126422  | Fam192a   | ENSMUSG00000031774  | -87  | 0.09 | 0.2  | 0.11 | 0.18 | 0.27 | 0.13 |
| chr8 | 75247115  | 75247906  | Sin3b     | ENSMUSG00000031622  | 323  | 0.17 | 0.2  | 0.09 | 0.29 | 0.36 | 0.22 |
| chr8 | 126038719 | 126039267 | Dbndd1    | ENSMUSG00000031970  | 297  | 0.08 | 0.16 | 0.11 | 0.18 | 0.21 | 0.16 |
| chr8 | 119257096 | 119257415 | Cdyl2     | ENSMUSG00000031758  | -364 | 0.09 | 0.17 | 0.08 | 0.11 | 0.17 | 0.19 |
| chr8 | 123651739 | 123653174 | Foxl1     | ENSMUSG00000043867  | 616  | 0.08 | 0.09 | 0.09 | 0.15 | 0.15 | 0.13 |
| chr8 | 109394533 | 109394937 | Has3      | ENSMUSG00000031910  | -1   | 0.1  | 0.19 | 0.08 | 0.19 | 0.24 | 0.1  |

|      |           |           |               |                    |      |      |      |      |      |      |      |
|------|-----------|-----------|---------------|--------------------|------|------|------|------|------|------|------|
| chr8 | 36439499  | 36439801  | Ppp1r3b       | ENSMUSG00000046794 | 855  | 1    | 0.17 | 0.11 | 0.23 | 0.34 | 0.14 |
| chr8 | 107898504 | 107899044 | Plekhg4       | ENSMUSG00000014782 | -30  | 0.67 | 0.68 | 0.5  | 0.63 | 0.56 | 0.55 |
| chr8 | 4087398   | 4087757   | Gm16589       | ENSMUSG00000074482 | 34   | 0.88 | 0.7  | 0.41 | 0.5  | 0.38 | 0.37 |
| chr8 | 82235203  | 82235829  | Abce1         | ENSMUSG00000058355 | 123  | 0.25 | 0.15 | 0.09 | 0.22 | 0.12 | 0.1  |
| chr8 | 109127193 | 109127924 | Cdh1          | ENSMUSG00000000303 | 307  | 0.08 | 0.07 | 0.13 | 0.15 | 0.22 | 0.14 |
| chr8 | 125135717 | 125135947 | Trappc2l      | ENSMUSG00000015013 | 306  | 0.32 | 0.38 | 0.14 | 0.13 | 0.13 | 0.18 |
| chr8 | 11758123  | 11758774  | Arhgef7       | ENSMUSG00000031511 | 94   | 0.06 | 0.12 | 0.1  | 0.16 | 0.12 | 0.13 |
| chr8 | 95198235  | 95198644  | Irx6          | ENSMUSG00000031738 | 251  | 0.09 | 0.24 | 0.09 | 0.22 | 0.35 | 0.11 |
| chr8 | 122098308 | 122099405 | Hsd1l         | ENSMUSG00000034189 | 244  | 0.05 | 0.05 | 0.08 | 0.13 | 0.14 | 0.15 |
| chr8 | 97876041  | 97877377  | Mmp15         | ENSMUSG00000031790 | 541  | 0.08 | 0.09 | 0.07 | 0.1  | 0.05 | 0.14 |
| chr8 | 8689796   | 8690634   | Arglu1        | ENSMUSG00000040459 | 102  | 0.06 | 0.08 | 0.07 | 0.13 | 0.09 | 0.12 |
| chr8 | 127472041 | 127473598 | Egln1         | ENSMUSG00000031987 | 335  | 0.07 | 0.12 | 0.09 | 0.11 | 0.11 | 0.13 |
| chr8 | 124430690 | 124431948 | Slc7a5        | ENSMUSG00000040010 | 267  | 0.12 | 0.09 | 0.08 | 0.14 | 0.05 | 0.14 |
| chr8 | 72876619  | 72877446  | Upf1          | ENSMUSG00000058301 | 140  | 0.17 | 0.19 | 0.14 | 0.22 | 0.25 | 0.13 |
| chr8 | 88224041  | 88224954  | Neto2         | ENSMUSG00000036902 | 156  | 0.14 | 0.1  | 0.1  | 0.15 | 0.09 | 0.12 |
| chr8 | 112261181 | 112261777 | Atxn1l        | ENSMUSG00000069895 | 160  | 0.38 | 0.1  | 0.07 | 0.14 | 0.17 | 0.13 |
| chr8 | 125565187 | 125566867 | Ankrd11       | ENSMUSG00000035569 | -130 | 0.07 | 0.09 | 0.08 | 0.14 | 0.11 | 0.11 |
| chr8 | 87323085  | 87323598  | Nfix          | ENSMUSG00000001911 | 582  | 0.05 | 0.05 | 0.08 | 0.1  | 0.11 | 0.15 |
| chr8 | 122637543 | 122638595 | 6430548M08Rik | ENSMUSG00000031824 | 17   | 0.05 | 0.06 | 0.09 | 0.13 | 0.11 | 0.12 |
| chr8 | 72497559  | 72498652  | Gatad2a       | ENSMUSG00000036180 | 177  | 0.08 | 0.1  | 0.11 | 0.15 | 0.15 | 0.13 |
| chr8 | 126506313 | 126507127 | Abcb10        | ENSMUSG00000031974 | 302  | 0.08 | 0.08 | 0.07 | 0.14 | 0.16 | 0.1  |
| chr8 | 112392337 | 112393179 | Gm17344       | ENSMUSG00000078143 | -403 | 0.13 | 0.12 | 0.08 | 0.14 | 0.07 | 0.13 |
| chr8 | 11006954  | 11009869  | 9530052E02Rik | ENSMUSG00000085270 | 561  | 0.15 | 0.15 | 0.11 | 0.15 | 0.11 | 0.17 |
| chr8 | 124793056 | 124793428 | Gm22          | ENSMUSG00000043903 | -227 | 0.52 | 0.52 | 0.9  | 0.84 | 0.94 | 0.75 |
| chr8 | 129116268 | 129118854 | Irf2bp2       | ENSMUSG00000051495 | -225 | 0.06 | 0.08 | 0.08 | 0.12 | 0.09 | 0.13 |
| chr8 | 81032408  | 81033688  | Rbmx1l        | ENSMUSG00000037070 | -221 | 0.13 | 0.08 | 0.12 | 0.19 | 0.07 | 0.21 |
| chr8 | 113557736 | 113558044 | Aars          | ENSMUSG00000031960 | 111  | 0.12 | 0.12 | 0.12 | 0.19 | 0.28 | 0.2  |
| chr8 | 28152927  | 28153563  | Prosc         | ENSMUSG00000031485 | 218  | 0.07 | 0.18 | 0.1  | 0.19 | 0.29 | 0.15 |
| chr8 | 26895336  | 26896510  | Bag4          | ENSMUSG00000037316 | -242 | 0.08 | 0.12 | 0.09 | 0.12 | 0.13 | 0.16 |
| chr8 | 116159137 | 116159699 | Mon1b         | ENSMUSG00000078908 | -432 | 0.14 | 0.29 | 0.14 | 0.13 | 0.27 | 0.13 |

|      |           |           |               |                    |      |      |      |      |      |      |      |
|------|-----------|-----------|---------------|--------------------|------|------|------|------|------|------|------|
| chr8 | 39723306  | 39723775  | Sgcz          | ENSMUSG00000039539 | 1022 | 0.08 | 0.07 | 0.08 | 0.14 | 0.16 | 0.16 |
| chr8 | 17534717  | 17535731  | Csmd1         | ENSMUSG00000060924 | -250 | 0.12 | 0.12 | 0.1  | 0.13 | 0.21 | 0.14 |
| chr8 | 123011374 | 123013609 | Gse1          | ENSMUSG00000031822 | -275 | 0.17 | 0.11 | 0.09 | 0.16 | 0.11 | 0.15 |
| chr8 | 74967536  | 74967779  | Calr3         | ENSMUSG00000019732 | 112  | 1    | NA   | 0.07 | 0.21 | 0.11 | 0.23 |
| chr8 | 86794134  | 86794361  | Ccdc130       | ENSMUSG00000004994 | -1   | 0.05 | 0.06 | 0.06 | 0.12 | 0.26 | 0.12 |
| chr8 | 13104514  | 13105956  | Pcid2         | ENSMUSG00000038542 | -414 | 0.06 | 0.19 | 0.1  | 0.14 | 0.1  | 0.18 |
| chr8 | 47379779  | 47380251  | Helt          | ENSMUSG00000047171 | 10   | 0.07 | 0.4  | 0.09 | 0.21 | 0.23 | 0.11 |
| chr8 | 113618213 | 113618940 | Pdpr          | ENSMUSG00000033624 | 46   | 0.03 | 0.08 | 0.06 | 0.11 | 0.08 | 0.07 |
| chr8 | 127420610 | 127422412 | Exoc8         | ENSMUSG00000074030 | 94   | 0.09 | 0.14 | 0.12 | 0.15 | 0.14 | 0.14 |
| chr8 | 109817207 | 109818420 | Nfat5         | ENSMUSG0000003847  | 443  | 0.1  | 0.2  | 0.11 | 0.16 | 0.16 | 0.11 |
| chr8 | 124900287 | 124901041 | Zc3h18        | ENSMUSG00000017478 | 155  | 0.05 | 0.08 | 0.09 | 0.12 | 0.08 | 0.15 |
| chr8 | 114377662 | 114378384 | Cfdp1         | ENSMUSG00000031954 | 187  | 0.09 | 0.16 | 0.1  | 0.16 | 0.18 | 0.12 |
| chr8 | 124999519 | 125000379 | Rnf166        | ENSMUSG00000014470 | -361 | 0.07 | 0.08 | 0.06 | 0.12 | 0.1  | 0.1  |
| chr8 | 81818367  | 81819211  | Mmaa          | ENSMUSG00000037022 | 66   | 0.19 | 0.08 | 0.1  | 0.18 | 0.07 | 0.19 |
| chr8 | 72425363  | 72427371  | Tssk6         | ENSMUSG00000047654 | 284  | 0.12 | 0.17 | 0.13 | 0.18 | 0.17 | 0.19 |
| chr8 | 73046711  | 73047163  | 2810422J05Rik | ENSMUSG00000055553 | 52   | 0.11 | 0.04 | 0.08 | 0.12 | 0.33 | 0.14 |
| chr8 | 112741578 | 112742028 | Ftsjd1        | ENSMUSG00000046441 | -57  | 0.07 | 0.15 | 0.11 | 0.13 | 0.12 | 0.16 |
| chr8 | 28195938  | 28196670  | Gpr124        | ENSMUSG00000031486 | -9   | 0.09 | 0.07 | 0.09 | 0.13 | 0.14 | 0.09 |
| chr8 | 42459715  | 42460317  | Asah1         | ENSMUSG00000031591 | -27  | 0.33 | 0.23 | 0.08 | 0.11 | 0.1  | 0.16 |
| chr8 | 73030388  | 73030721  | 2810428I15Rik | ENSMUSG00000058833 | 44   | 0.05 | 0.34 | 0.06 | 0.12 | 0.17 | 0.22 |
| chr8 | 106864404 | 106865123 | Cmtm3         | ENSMUSG00000031875 | 269  | 0.24 | 0.21 | 0.13 | 0.17 | 0.12 | 0.15 |
| chr8 | 122624883 | 122625770 | Zdhhc7        | ENSMUSG00000031823 | -354 | 0.06 | 0.09 | 0.08 | 0.09 | 0.11 | 0.14 |
| chr8 | 126177559 | 126178443 | Rhou          | ENSMUSG00000039960 | 172  | 0.06 | 0.22 | 0.09 | 0.11 | 0.14 | 0.18 |
| chr8 | 18845955  | 18846995  | Agpat5        | ENSMUSG00000031467 | 198  | 0.06 | 0.13 | 0.11 | 0.2  | 0.1  | 0.18 |
| chr8 | 34752182  | 34752584  | Ubxn8         | ENSMUSG00000052906 | 65   | 0.29 | 0.18 | 0.1  | 0.22 | 0.11 | 0.19 |
| chr8 | 94323584  | 94325498  | D230002A01Rik | ENSMUSG00000046413 | 227  | 0.15 | 0.15 | 0.12 | 0.2  | 0.11 | 0.14 |
| chr8 | 107849934 | 107850574 | Lrrc29        | ENSMUSG00000041679 | -76  | 0.08 | 0.16 | 0.11 | 0.25 | 0.2  | 0.15 |
| chr8 | 41719917  | 41720282  | Mtmr7         | ENSMUSG00000039431 | 14   | 0.05 | 0.07 | 0.08 | 0.09 | 0.14 | 0.12 |
| chr8 | 86090531  | 86091027  | Ndufb7        | ENSMUSG00000033938 | 209  | 0.22 | 0.12 | 0.11 | 0.16 | 0.12 | 0.15 |
| chr8 | 123059670 | 123062161 | Gse1          | ENSMUSG00000031822 | 1158 | 0.08 | 0.11 | 0.1  | 0.14 | 0.11 | 0.11 |

|      |           |           |               |                     |      |      |      |      |      |      |      |
|------|-----------|-----------|---------------|---------------------|------|------|------|------|------|------|------|
| chr8 | 86238888  | 86239706  | Ddx39         | ENSMUSG00000005481  | 221  | 0.07 | 0.21 | 0.12 | 0.15 | 0.13 | 0.2  |
| chr8 | 26830444  | 26830966  | Ppapdc1b      | ENSMUSG000000031570 | 172  | 0.32 | 0.1  | 0.14 | 0.13 | 0.13 | 0.2  |
| chr8 | 73362905  | 73363575  | Arrdc2        | ENSMUSG00000002910  | 193  | 0.05 | 0.08 | 0.1  | 0.23 | 0.15 | 0.09 |
| chr8 | 113443786 | 113444196 | St3gal2       | ENSMUSG000000031749 | 169  | 0.57 | 0.79 | 0.09 | 0.37 | 0.19 | 0.22 |
| chr8 | 107165340 | 107165958 | Fam96b        | ENSMUSG000000031879 | -50  | 0.24 | 0.07 | 0.15 | 0.12 | 0.11 | 0.2  |
| chr8 | 11497356  | 11497908  | Carkd         | ENSMUSG000000031505 | 30   | 0.13 | 0.24 | 0.1  | 0.23 | 0.22 | 0.15 |
| chr8 | 47825789  | 47826855  | Irf2          | ENSMUSG000000031627 | 1223 | 0.1  | 0.13 | 0.1  | 0.14 | 0.15 | 0.11 |
| chr8 | 93837104  | 93837686  | Rpgrip1l      | ENSMUSG000000033282 | -274 | 1    | 1    | 0.16 | 0.44 | 0.53 | 0.27 |
| chr8 | 119467352 | 119467947 | Atmin         | ENSMUSG000000047388 | 356  | 0.08 | 0.11 | 0.1  | 0.07 | 0.17 | 0.14 |
| chr8 | 124253726 | 124254897 | Jph3          | ENSMUSG000000025318 | -152 | 0.08 | 0.08 | 0.1  | 0.13 | 0.11 | 0.13 |
| chr8 | 9770334   | 9770674   | Fam155a       | ENSMUSG000000079157 | 514  | 0.17 | 0.05 | 0.12 | 0.18 | 0.07 | 0.07 |
| chr8 | 9771396   | 9771971   | Fam155a       | ENSMUSG000000079157 | -665 | 0.19 | 0.14 | 0.12 | 0.16 | 0.09 | 0.12 |
| chr8 | 73796186  | 73797027  | Haus8         | ENSMUSG000000035439 | -349 | 0.06 | 0.14 | 0.15 | 0.09 | 0.12 | 0.14 |
| chr8 | 85966088  | 85966649  | Scoc          | ENSMUSG000000063253 | 179  | 0.11 | 0.14 | 0.17 | 0.21 | 0.24 | 0.15 |
| chr8 | 114535257 | 114536114 | Terf2ip       | ENSMUSG000000033430 | 426  | 0.1  | 0.25 | 0.13 | 0.11 | 0.16 | 0.17 |
| chr8 | 116963451 | 116963994 | Wwox          | ENSMUSG000000004637 | 167  | 0.07 | 0.09 | 0.12 | 0.15 | 0.16 | 0.2  |
| chr8 | 126755076 | 126756386 | Galnt2        | ENSMUSG000000089704 | 440  | 0.09 | 0.13 | 0.09 | 0.12 | 0.12 | 0.12 |
| chr8 | 42324913  | 42325736  | Pcm1          | ENSMUSG000000031592 | 211  | 0.23 | 0.5  | 0.15 | 0.17 | 0.55 | 0.19 |
| chr8 | 112692025 | 112692228 | Calb2         | ENSMUSG000000003657 | -20  | 0.56 | 0.34 | 0.1  | 0.16 | 0.22 | 0.29 |
| chr8 | 11312171  | 11313231  | Col4a2        | ENSMUSG000000031503 | -104 | 0.27 | 0.14 | 0.12 | 0.16 | 0.18 | 0.23 |
| chr8 | 74134833  | 74135450  | Git25d1       | ENSMUSG000000034807 | 218  | 0.89 | 0.37 | 0.24 | 0.26 | 0.43 | 0.27 |
| chr8 | 75071379  | 75072963  | Med26         | ENSMUSG000000045248 | 38   | 0.15 | 0.15 | 0.12 | 0.17 | 0.09 | 0.19 |
| chr8 | 86222430  | 86223238  | Pkn1          | ENSMUSG000000057672 | 162  | 0.14 | 0.2  | 0.11 | 0.15 | 0.07 | 0.11 |
| chr8 | 46443794  | 46444053  | Fam149a       | ENSMUSG000000070044 | 193  | 0.16 | 0.07 | 0.09 | 0.13 | 0.05 | 0.12 |
| chr8 | 109571939 | 109572702 | Pdf           | ENSMUSG000000078931 | 194  | 0.12 | 0.25 | 0.13 | 0.13 | 0.18 | 0.16 |
| chr8 | 109580091 | 109581233 | Cog8          | ENSMUSG000000031916 | -264 | 0.08 | 0.18 | 0.1  | 0.19 | 0.12 | 0.16 |
| chr8 | 72806984  | 72807413  | Homer3        | ENSMUSG000000003573 | 265  | 0.12 | 0.11 | 0.12 | 0.14 | 0.25 | 0.1  |
| chr8 | 129587458 | 129588948 | Pard3         | ENSMUSG000000025812 | 410  | 0.06 | 0.08 | 0.1  | 0.13 | 0.08 | 0.12 |
| chr8 | 69010123  | 69010546  | 1810029B16Rik | ENSMUSG000000025591 | 62   | 0.22 | 0.23 | 0.16 | 0.17 | 0.11 | 0.16 |
| chr8 | 73904191  | 73906382  | Nr2f6         | ENSMUSG000000002393 | -478 | 0.11 | 0.21 | 0.11 | 0.14 | 0.14 | 0.15 |

|      |           |           |               |                    |       |      |      |      |      |      |      |
|------|-----------|-----------|---------------|--------------------|-------|------|------|------|------|------|------|
| chr8 | 87140975  | 87141228  | Gm16183       | ENSMUSG00000086067 | -18   | 0.08 | 0.09 | 0.23 | 0.27 | 0.18 | 0.3  |
| chr8 | 37795684  | 37796027  | Dlc1          | ENSMUSG00000031523 | 253   | 0.05 | 0.09 | 0.13 | 0.13 | 0.11 | 0.13 |
| chr8 | 72412880  | 72413436  | Yjfn3         | ENSMUSG00000048967 | -1074 | 0.06 | 0.16 | 0.1  | 0.09 | 0.09 | 0.14 |
| chr8 | 28284560  | 28285250  | Rab11fip1     | ENSMUSG00000031488 | 198   | 0.05 | 0.13 | 0.11 | 0.11 | 0.1  | 0.1  |
| chr8 | 124474274 | 124475134 | Banp          | ENSMUSG00000025316 | 312   | 0.08 | 0.14 | 0.08 | 0.11 | 0.12 | 0.15 |
| chr8 | 13159101  | 13159386  | Lamp1         | ENSMUSG00000031447 | 108   | 0.19 | 0.16 | 0.2  | 0.23 | 0.3  | 0.17 |
| chr8 | 41371736  | 41371958  | Fgf20         | ENSMUSG00000031603 | 460   | 0.03 | 0.1  | 0.12 | 0.1  | 0.09 | 0.13 |
| chr8 | 128193665 | 128194221 | 4933403G14Rik | ENSMUSG00000050930 | 225   | 0.09 | 0.15 | 0.12 | 0.23 | 0.13 | 0.19 |
| chr8 | 73987006  | 73987672  | Abhd8         | ENSMUSG00000007950 | 217   | 0.05 | 0.13 | 0.1  | 0.09 | 0.09 | 0.13 |
| chr8 | 125641216 | 125641526 | Cpne7         | ENSMUSG00000034796 | 97    | 0.07 | 0.13 | 0.07 | 0.17 | 0.12 | 0.13 |
| chr8 | 47248684  | 47249438  | 4933411K20Rik | ENSMUSG00000031631 | 56    | 0.14 | 0.11 | 0.11 | 0.14 | 0.09 | 0.13 |
| chr8 | 80960174  | 80960379  | Pou4f2        | ENSMUSG00000031688 | 268   | 0.1  | 1    | 0.17 | 0.21 | 0.37 | 0.21 |
| chr8 | 107821451 | 107821881 | E2f4          | ENSMUSG00000014859 | 103   | 0.12 | 0.17 | 0.09 | 0.11 | 0.18 | 0.14 |
| chr8 | 47702418  | 47703225  | Ccdc111       | ENSMUSG00000038225 | -267  | 0.14 | 0.14 | 0.11 | 0.22 | 0.24 | 0.12 |
| chr8 | 12671772  | 12672592  | Tubgcp3       | ENSMUSG00000000759 | -223  | 0.08 | 0.11 | 0.13 | 0.14 | 0.18 | 0.13 |
| chr8 | 77617415  | 77617678  | Hmox1         | ENSMUSG00000005413 | 56    | 0.13 | 0.23 | 0.12 | 0.16 | 0.3  | 0.12 |
| chr8 | 91045259  | 91045689  | Nkd1          | ENSMUSG00000031661 | 231   | 0.08 | 0.13 | 0.08 | 0.14 | 0.15 | 0.15 |
| chr8 | 127386670 | 127387455 | 2810004N23Rik | ENSMUSG00000031984 | -133  | 0.16 | NA   | 0.11 | 0.09 | 0.09 | 0.09 |
| chr8 | 55614850  | 55615461  | Spes3         | ENSMUSG00000054408 | 196   | 0.04 | 0.06 | 0.09 | 0.12 | 0.1  | 0.09 |
| chr8 | 71612430  | 71612848  | Atp6v1b2      | ENSMUSG00000006273 | 94    | 0.35 | 0.41 | 0.16 | 0.31 | 0.22 | 0.16 |
| chr8 | 110111838 | 110112429 | Psmc7         | ENSMUSG00000039067 | 249   | 0.06 | 0.07 | 0.18 | 0.12 | 0.1  | 0.21 |
| chr8 | 124805152 | 124805409 | Zfpn1         | ENSMUSG00000049577 | -761  | 0.18 | 0.08 | 0.27 | 0.44 | 0.05 | 0.11 |
| chr8 | 126544680 | 126545561 | Taf5l         | ENSMUSG00000038697 | -212  | 0.09 | 0.15 | 0.13 | 0.16 | 0.05 | 0.16 |
| chr8 | 67373217  | 67374252  | Klhl2         | ENSMUSG00000031605 | -18   | 0.13 | 0.07 | 0.12 | 0.09 | 0.19 | 0.17 |
| chr8 | 12385051  | 12386496  | Gm5607        | ENSMUSG00000047935 | 2     | 0.12 | 0.12 | 0.13 | 0.17 | 0.18 | 0.17 |
| chr8 | 13785316  | 13786400  | Upf3a         | ENSMUSG00000038398 | 243   | 0.07 | 0.08 | 0.1  | 0.14 | 0.12 | 0.17 |
| chr8 | 27229266  | 27230359  | Hook3         | ENSMUSG00000037234 | -116  | 0.14 | 0.14 | 0.1  | 0.14 | 0.11 | 0.17 |
| chr8 | 125074633 | 125075614 | Fam38a        | ENSMUSG00000014444 | 106   | 0.11 | 0.13 | 0.1  | 0.17 | 0.15 | 0.12 |
| chr8 | 8659823   | 8661897   | Efnb2         | ENSMUSG00000001300 | -87   | 0.07 | 0.11 | 0.09 | 0.12 | 0.1  | 0.12 |
| chr8 | 83262319  | 83263869  | Smarca5       | ENSMUSG00000031715 | 230   | 0.18 | 0.11 | 0.18 | 0.4  | 0.26 | 0.24 |

|      |           |           |               |                     |       |      |      |      |      |      |      |
|------|-----------|-----------|---------------|---------------------|-------|------|------|------|------|------|------|
| chr8 | 48759003  | 48761295  | Ing2          | ENSMUSG00000063049  | -1106 | 0.1  | 0.11 | 0.1  | 0.15 | 0.14 | 0.14 |
| chr8 | 129494667 | 129495128 | Rbm34         | ENSMUSG00000033931  | 73    | 0.09 | 0.72 | 0.06 | 0.08 | 0.25 | 0.08 |
| chr8 | 13907675  | 13908105  | Fbxo25        | ENSMUSG00000038365  | 87    | 0.17 | 0.1  | 0.09 | 0.09 | 0.09 | 0.09 |
| chr8 | 96535545  | 96536846  | Amfr          | ENSMUSG00000031751  | -168  | 0.06 | 0.13 | 0.09 | 0.14 | 0.08 | 0.14 |
| chr8 | 61391278  | 61391800  | BC030500      | ENSMUSG00000049946  | 485   | 0.42 | 0.11 | 0.25 | 0.34 | 0.2  | 0.25 |
| chr8 | 87396070  | 87396795  | Syce2         | ENSMUSG00000003824  | 340   | 0.12 | 0.1  | 0.17 | 0.27 | 0.18 | 0.23 |
| chr8 | 24318290  | 24319228  | Agpat6        | ENSMUSG000000031545 | 74    | 0.08 | 0.11 | 0.08 | 0.12 | 0.1  | 0.13 |
| chr8 | 91569106  | 91569488  | Sall1         | ENSMUSG000000031665 | -1236 | 0.89 | 0.91 | 0.13 | 0.28 | 0.73 | 0.11 |
| chr8 | 107871450 | 107872065 | Fhod1         | ENSMUSG000000014778 | 52    | 0.18 | 0.14 | 0.11 | 0.21 | 0.08 | 0.22 |
| chr8 | 13676991  | 13677921  | Rasa3         | ENSMUSG000000031453 | -5    | 0.08 | 0.18 | 0.14 | 0.13 | 0.12 | 0.28 |
| chr8 | 112089315 | 112089890 | Dhx38         | ENSMUSG000000037993 | -101  | 0.14 | 0.11 | 0.11 | 0.2  | 0.3  | 0.16 |
| chr8 | 119502561 | 119503049 | 1700030J22Rik | ENSMUSG000000031847 | 38    | 0.06 | 0.24 | 0.09 | 0.13 | 0.15 | 0.15 |
| chr8 | 125299276 | 125299777 | Acsf3         | ENSMUSG000000015016 | 121   | 0.31 | 0.15 | 0.15 | 0.18 | 0.15 | 0.19 |
| chr8 | 41947476  | 41948187  | Slc7a2        | ENSMUSG000000031596 | 81    | 0.35 | 0.18 | 0.31 | 0.2  | 0.22 | 0.17 |
| chr8 | 46108595  | 46109561  | Gm2366        | ENSMUSG000000091546 | -1339 | 0.96 | 0.99 | 0.98 | 0.96 | 1    | 0.99 |
| chr8 | 127186704 | 127187530 | 2310022B05Rik | ENSMUSG000000031983 | 152   | 0.11 | 0.22 | 0.1  | 0.12 | 0.15 | 0.19 |
| chr8 | 23295979  | 23296437  | Ckap2         | ENSMUSG000000037725 | 83    | 0.06 | 0.16 | 0.09 | 0.11 | 0.09 | 0.11 |
| chr8 | 122516070 | 122516339 | Crispld2      | ENSMUSG000000031825 | -134  | 0.15 | 0.06 | 0.26 | 0.21 | 0.67 | 0.18 |
| chr8 | 35209467  | 35210070  | Leprotl1      | ENSMUSG000000031513 | 319   | 0.1  | 0.1  | 0.08 | 0.11 | 0.08 | 0.1  |
| chr8 | 73118246  | 73119420  | Isyna1        | ENSMUSG000000019139 | 453   | 0.16 | 0.16 | 0.1  | 0.16 | 0.29 | 0.13 |
| chr8 | 86773240  | 86773730  | D8ErtD738e    | ENSMUSG000000019362 | 175   | 0.06 | 0.21 | 0.22 | 0.39 | 0.13 | 0.25 |
| chr8 | 107154490 | 107154865 | Rrad          | ENSMUSG000000031880 | 544   | 0.15 | 0.42 | 0.14 | 0.28 | 0.37 | 0.24 |
| chr8 | 83403274  | 83404226  | Gab1          | ENSMUSG000000031714 | 628   | 0.09 | 0.22 | 0.15 | 0.23 | 0.15 | 0.16 |
| chr8 | 86938161  | 86939589  | Cacna1a       | ENSMUSG000000034656 | -388  | 0.11 | 0.22 | 0.1  | 0.14 | 0.08 | 0.17 |
| chr8 | 108659815 | 108661036 | Esrp2         | ENSMUSG000000084128 | 160   | 0.34 | 0.33 | 0.15 | 0.21 | 0.24 | 0.21 |
| chr8 | 60130540  | 60132178  | Gaint7        | ENSMUSG000000031608 | 441   | 0.1  | 0.11 | 0.1  | 0.15 | 0.15 | 0.14 |
| chr8 | 119256195 | 119256522 | Cdyl2         | ENSMUSG000000031758 | 533   | 0.26 | 0.43 | 0.1  | 0.19 | 0.48 | 0.18 |
| chr8 | 128822323 | 128822949 | Slc35f3       | ENSMUSG000000057060 | 178   | 0.08 | 0.05 | 0.09 | 0.17 | 0.12 | 0.12 |
| chr8 | 48618678  | 48619412  | D030016E14Rik | ENSMUSG000000038102 | -224  | 0.07 | 0.14 | 0.08 | 0.19 | 0.14 | 0.11 |
| chr8 | 77557434  | 77558243  | Tom1          | ENSMUSG000000042870 | 253   | 0.06 | 0.06 | 0.08 | 0.1  | 0.11 | 0.13 |

|      |           |           |               |                    |      |      |      |      |      |      |      |
|------|-----------|-----------|---------------|--------------------|------|------|------|------|------|------|------|
| chr8 | 120022096 | 120022781 | Plcg2         | ENSMUSG00000034330 | 247  | 0.1  | 0.14 | 0.1  | 0.16 | 0.13 | 0.14 |
| chr8 | 13869646  | 13870141  | Zfp828        | ENSMUSG00000047710 | 189  | 0.46 | 0.38 | 0.17 | 0.28 | 0.31 | 0.18 |
| chr8 | 23303214  | 23303716  | Vps36         | ENSMUSG00000031479 | 184  | 0.08 | 0.16 | 0.08 | 0.11 | 0.12 | 0.21 |
| chr8 | 33118905  | 33120253  | Gm17443       | ENSMUSG00000091819 | 603  | 0.1  | 0.1  | 0.1  | 0.15 | 0.12 | 0.14 |
| chr8 | 97605255  | 97605477  | Katnb1        | ENSMUSG00000031787 | 265  | 0.21 | 0.12 | 0.12 | 0.27 | 0.13 | 0.17 |
| chr8 | 105308778 | 105308994 | Cdh11         | ENSMUSG00000031673 | 125  | 0.19 | 0.2  | 0.08 | 0.12 | 0.09 | 0.12 |
| chr8 | 113861778 | 113862011 | Mkl1          | ENSMUSG00000012519 | 183  | 0.03 | 0.04 | 0.11 | 0.09 | 0.07 | 0.19 |
| chr8 | 123259900 | 123260385 | Irf8          | ENSMUSG00000041515 | -116 | 0.23 | 0.67 | 0.11 | 0.11 | 0.39 | 0.12 |
| chr8 | 125626119 | 125626797 | Rpl13         | ENSMUSG00000000740 | 208  | 0.1  | 0.23 | 0.1  | 0.15 | 0.17 | 0.13 |
| chr8 | 3621239   | 3621646   | Xab2          | ENSMUSG00000019470 | -172 | 0.14 | 0.22 | 0.14 | 0.31 | 0.35 | 0.2  |
| chr8 | 26711949  | 26713178  | Whsc111       | ENSMUSG00000054823 | 490  | 0.08 | 0.16 | 0.12 | 0.14 | 0.1  | 0.14 |
| chr8 | 87295879  | 87296231  | Nfix          | ENSMUSG00000001911 | 1240 | 0.11 | 0.32 | 0.15 | 0.17 | 0.38 | 0.22 |
| chr8 | 114464494 | 114465195 | Gabarapl2     | ENSMUSG00000031950 | 241  | 0.4  | 0.22 | 0.14 | 0.22 | 0.28 | 0.21 |
| chr8 | 118229638 | 118231425 | Maf           | ENSMUSG00000055435 | 465  | 0.07 | 0.11 | 0.08 | 0.13 | 0.09 | 0.13 |
| chr8 | 127245539 | 127246307 | Ttc13         | ENSMUSG00000037300 | -59  | 0.07 | 0.08 | 0.14 | 0.17 | 0.1  | 0.18 |
| chr8 | 23508625  | 23509208  | Slc25a15      | ENSMUSG00000031482 | 177  | 0.06 | 0.1  | 0.09 | 0.09 | 0.1  | 0.12 |
| chr8 | 34495933  | 34496745  | Wrn           | ENSMUSG00000031583 | -340 | 0.08 | 0.23 | 0.08 | 0.17 | 0.16 | 0.11 |
| chr8 | 47236990  | 47237259  | Snx25         | ENSMUSG00000038291 | -65  | 0.04 | 0.06 | 0.06 | 0.06 | 0.06 | 0.1  |
| chr8 | 107872646 | 107873572 | Slc9a5        | ENSMUSG00000014786 | 951  | 0.14 | 0.06 | 0.17 | 0.16 | 0.1  | 0.15 |
| chr8 | 130883276 | 130883702 | Mir1903       | ENSMUSG00000084523 | 348  | 0.14 | 0.62 | 0.14 | 0.2  | 0.25 | 0.28 |
| chr8 | 23586867  | 23587703  | Slc20a2       | ENSMUSG00000037656 | 113  | 0.07 | 0.07 | 0.09 | 0.13 | 0.09 | 0.1  |
| chr8 | 87162566  | 87162769  | Cacna1a       | ENSMUSG00000034656 | -223 | 1    | 0.33 | 0.34 | 0.34 | 0.62 | 0.38 |
| chr8 | 11555149  | 11558650  | Ing1          | ENSMUSG00000045969 | 833  | 0.12 | 0.12 | 0.11 | 0.13 | 0.1  | 0.15 |
| chr8 | 23763513  | 23763977  | Polb          | ENSMUSG00000031536 | 164  | 0.17 | 0.11 | 0.14 | 0.11 | 0.23 | 0.21 |
| chr8 | 24521839  | 24522964  | Sfrp1         | ENSMUSG00000031548 | 427  | 0.06 | 0.08 | 0.07 | 0.11 | 0.08 | 0.11 |
| chr8 | 36028096  | 36028842  | Gm9939        | ENSMUSG00000054247 | 363  | 0.1  | 0.16 | 0.13 | 0.15 | 0.13 | 0.16 |
| chr8 | 46129636  | 46129869  | Fat1          | ENSMUSG00000070047 | 234  | 0.96 | 0.96 | 0.96 | 1    | 0.99 | 0.94 |
| chr8 | 96334560  | 96335416  | Gnao1         | ENSMUSG00000031748 | 250  | 0.23 | 0.17 | 0.1  | 0.16 | 0.14 | 0.13 |
| chr8 | 13889868  | 13890396  | 2410022L05Rik | ENSMUSG00000031458 | 139  | 0.07 | 0.2  | 0.1  | 0.18 | 0.13 | 0.12 |
| chr8 | 73895166  | 73895812  | Ocel1         | ENSMUSG00000002396 | 292  | 0.08 | 0.1  | 0.1  | 0.16 | 0.1  | 0.14 |



|      |           |           |               |                     |      |      |      |      |      |      |      |
|------|-----------|-----------|---------------|---------------------|------|------|------|------|------|------|------|
| chr8 | 114434000 | 114434233 | Chst5         | ENSMUSG000000031952 | -17  | 0.16 | 0.4  | 0.11 | 0.15 | 0.28 | 0.13 |
| chr8 | 14095589  | 14097363  | Dlgap2        | ENSMUSG000000047495 | 611  | 0.15 | 0.19 | 0.13 | 0.2  | 0.18 | 0.15 |
| chr8 | 59965736  | 59966807  | Sap30         | ENSMUSG000000031609 | 386  | 0.11 | 0.09 | 0.1  | 0.15 | 0.07 | 0.13 |
| chr8 | 72608072  | 72609019  | HaplIn4       | ENSMUSG000000007594 | 1117 | 0.32 | 0.1  | 0.13 | 0.07 | 0.17 | 0.17 |
| chr8 | 74066623  | 74067186  | Fam125a       | ENSMUSG000000031813 | 75   | 0.09 | 0.08 | 0.1  | 0.09 | 0.04 | 0.14 |
| chr8 | 75015928  | 75016949  | Slc35e1       | ENSMUSG000000019731 | -322 | 0.08 | 0.11 | 0.1  | 0.14 | 0.11 | 0.12 |
| chr8 | 87583932  | 87584414  | Fbxw9         | ENSMUSG000000008167 | 219  | 0.28 | 0.73 | 0.15 | 0.2  | 0.55 | 0.17 |
| chr8 | 108734378 | 108735420 | Slc7a6os      | ENSMUSG000000033106 | -66  | 0.09 | 0.12 | 0.14 | 0.14 | 0.16 | 0.11 |
| chr8 | 114267375 | 114267873 | Bcar1         | ENSMUSG000000031955 | 124  | 0.08 | 0.14 | 0.1  | 0.09 | 0.11 | 0.14 |
| chr8 | 128258027 | 128258413 | Ntpr          | ENSMUSG000000031851 | 117  | 0.23 | 0.21 | 0.14 | 0.19 | 0.13 | 0.17 |
| chr8 | 34763905  | 34764388  | Gsr           | ENSMUSG000000031584 | 84   | 0.14 | 0.19 | 0.11 | 0.22 | 0.09 | 0.21 |
| chr8 | 73899634  | 73900171  | Nr2f6         | ENSMUSG000000002393 | -213 | 0.13 | 0.16 | 0.1  | 0.15 | 0.1  | 0.16 |
| chr8 | 80958694  | 80959759  | Pou4f2        | ENSMUSG000000031688 | 1318 | 0.06 | 0.08 | 0.09 | 0.19 | 0.11 | 0.12 |
| chr8 | 89408498  | 89409309  | N4bp1         | ENSMUSG000000031652 | 254  | 0.08 | 0.09 | 0.1  | 0.15 | 0.13 | 0.13 |
| chr8 | 90467617  | 90467981  | Zfp423        | ENSMUSG000000045333 | 152  | 0.08 | 0.22 | 0.2  | 0.25 | 0.12 | 0.18 |
| chr8 | 125777714 | 125778855 | 1300018117Rik | ENSMUSG000000001062 | -334 | 0.08 | 0.12 | 0.1  | 0.16 | 0.1  | 0.14 |
| chr8 | 4677317   | 4678591   | Gm7461        | ENSMUSG000000048484 | 411  | 0.1  | 0.12 | 0.11 | 0.21 | 0.14 | 0.17 |
| chr8 | 72826234  | 72826862  | Ddx49         | ENSMUSG000000057788 | -215 | 0.15 | 0.14 | 0.13 | 0.19 | 0.22 | 0.21 |
| chr8 | 74842621  | 74844057  | Klf2          | ENSMUSG000000055148 | 407  | 0.06 | 0.08 | 0.07 | 0.13 | 0.07 | 0.11 |
| chr8 | 114255636 | 114256225 | Bcar1         | ENSMUSG000000031955 | 106  | 0.1  | 0.11 | 0.09 | 0.15 | 0.07 | 0.14 |
| chr8 | 121970498 | 121971343 | Necab2        | ENSMUSG000000031837 | 301  | 0.09 | 0.13 | 0.12 | 0.14 | 0.12 | 0.13 |
| chr8 | 3676348   | 3676723   | Trappc5       | ENSMUSG000000040236 | 236  | 0.08 | 0.23 | 0.17 | 0.16 | 0.16 | 0.16 |
| chr8 | 37311133  | 37312390  | Lonrf1        | ENSMUSG000000039633 | 809  | 0.09 | 0.14 | 0.1  | 0.15 | 0.11 | 0.13 |
| chr8 | 87187897  | 87188283  | Gm2529        | ENSMUSG000000073822 | -937 | 0.21 | 0.06 | 0.14 | 0.18 | 0.15 | 0.14 |
| chr8 | 113142419 | 113142979 | Vac14         | ENSMUSG000000010936 | 196  | 0.1  | 0.08 | 0.11 | 0.13 | 0.16 | 0.14 |
| chr8 | 12395517  | 12397679  | AC102525.1    | ENSMUSG000000092656 | 195  | 0.09 | 0.15 | 0.12 | 0.21 | 0.11 | 0.15 |
| chr8 | 37157648  | 37158296  | D8ErtD82e     | ENSMUSG000000050271 | 90   | 0.19 | 0.15 | 0.08 | 0.15 | 0.3  | 0.09 |
| chr8 | 73024788  | 73025172  | Crff1         | ENSMUSG000000007888 | -52  | 0.08 | 0.3  | 0.12 | 0.2  | 0.13 | 0.16 |
| chr8 | 96738405  | 96738914  | Nup93         | ENSMUSG000000032939 | 162  | 0.31 | 0.1  | 0.14 | 0.3  | 0.17 | 0.19 |
| chr8 | 123606584 | 123609136 | 1110050K14Rik | ENSMUSG000000087156 | -928 | 0.18 | 0.2  | 0.12 | 0.2  | 0.13 | 0.14 |

|      |           |           |               |                     |      |      |      |      |      |      |      |
|------|-----------|-----------|---------------|---------------------|------|------|------|------|------|------|------|
| chr8 | 127275148 | 127275945 | Fam89a        | ENSMUSG00000043068  | 163  | 0.18 | 0.12 | 0.11 | 0.27 | 0.12 | 0.15 |
| chr8 | 73929802  | 73930320  | Ankle1        | ENSMUSG00000046295  | 152  | 0.09 | 0.17 | 0.11 | 0.15 | 0.06 | 0.13 |
| chr8 | 86671666  | 86672014  | Cc2d1a        | ENSMUSG00000036686  | -76  | 0.05 | 0.05 | 0.08 | 0.13 | 0.15 | 0.18 |
| chr8 | 87604201  | 87604503  | Wdr83         | ENSMUSG00000005150  | 179  | 0.13 | 0.54 | 0.18 | 0.32 | 0.5  | 0.26 |
| chr8 | 14090178  | 14090440  | Erich1        | ENSMUSG000000051978 | -8   | 0.07 | 0.05 | 0.08 | 0.08 | 0.04 | 0.14 |
| chr8 | 28133924  | 28134549  | Erlin2        | ENSMUSG000000031483 | -95  | 0.5  | 0.33 | 0.21 | 0.39 | 0.17 | 0.19 |
| chr8 | 48373187  | 48374877  | Stox2         | ENSMUSG000000038143 | 724  | 0.13 | 0.17 | 0.12 | 0.18 | 0.1  | 0.13 |
| chr8 | 108502958 | 108503449 | Dpep3         | ENSMUSG000000031898 | 116  | 0.94 | 0.94 | 0.91 | 0.87 | 0.98 | 0.97 |
| chr8 | 113551545 | 113551797 | Ddx19b        | ENSMUSG000000033658 | -7   | 0.04 | 0.04 | 0.11 | 0.17 | 0.13 | 0.07 |
| chr8 | 122364083 | 122364579 | Cott1         | ENSMUSG000000031827 | 91   | 0.08 | 0.15 | 0.11 | 0.2  | 0.2  | 0.07 |
| chr8 | 124175271 | 124177186 | Zcchc14       | ENSMUSG000000061410 | -395 | 0.1  | 0.11 | 0.1  | 0.14 | 0.12 | 0.11 |
| chr8 | 128519000 | 128519826 | Kcnk1         | ENSMUSG000000033998 | 411  | 0.11 | 0.23 | 0.11 | 0.15 | 0.18 | 0.15 |
| chr8 | 3492967   | 3493611   | Zfp358        | ENSMUSG000000047264 | 151  | 0.11 | 0.2  | 0.12 | 0.2  | 0.21 | 0.11 |
| chr8 | 73017012  | 73018250  | Crif1         | ENSMUSG00000007888  | 574  | 0.1  | 0.06 | 0.08 | 0.11 | 0.08 | 0.09 |
| chr8 | 97056538  | 97057530  | Cpne2         | ENSMUSG000000034361 | 144  | 0.06 | 0.11 | 0.07 | 0.14 | 0.09 | 0.09 |
| chr8 | 112485625 | 112486189 | Marveld3      | ENSMUSG00000001672  | 46   | 0.09 | 0.17 | 0.19 | 0.28 | 0.13 | 0.18 |
| chr8 | 55162574  | 55163319  | Vegfc         | ENSMUSG000000031520 | 60   | 0.1  | 0.07 | 0.14 | 0.16 | 0.08 | 0.14 |
| chr8 | 80073232  | 80073458  | Prmt10        | ENSMUSG000000037134 | 49   | 0.1  | 0.26 | 0.1  | 0.16 | 0.06 | 0.16 |
| chr8 | 97381327  | 97382005  | Polr2c        | ENSMUSG000000031783 | 316  | 0.11 | 0.11 | 0.11 | 0.18 | 0.16 | 0.21 |
| chr8 | 73890718  | 73891376  | Use1          | ENSMUSG000000002395 | 300  | 0.25 | 0.22 | 0.2  | 0.45 | 0.14 | 0.24 |
| chr8 | 93593892  | 93594406  | Rbl2          | ENSMUSG000000031666 | 193  | 0.5  | NA   | 0.14 | 0.29 | 0.11 | 0.18 |
| chr8 | 108692591 | 108693068 | Slc7a6        | ENSMUSG000000031904 | 54   | 0.06 | 0.08 | 0.07 | 0.11 | 0.07 | 0.1  |
| chr8 | 119445024 | 119445936 | 2310061C15Rik | ENSMUSG000000014633 | -215 | 0.11 | 0.26 | 0.13 | 0.17 | 0.16 | 0.12 |
| chr8 | 123191561 | 123192709 | Cox4nb        | ENSMUSG000000031819 | -123 | 0.1  | 0.09 | 0.09 | 0.15 | 0.13 | 0.16 |
| chr8 | 125935254 | 125935658 | Tubb3         | ENSMUSG000000062380 | 132  | 0.04 | 0.08 | 0.08 | 0.11 | 0.09 | 0.12 |
| chr8 | 72566002  | 72567279  | Mau2          | ENSMUSG000000031858 | -7   | 0.1  | 0.33 | 0.13 | 0.16 | 0.15 | 0.16 |
| chr8 | 81553390  | 81554730  | Zfp827        | ENSMUSG000000071064 | 1574 | 0.09 | 0.18 | 0.1  | 0.17 | 0.12 | 0.15 |
| chr8 | 87211164  | 87211853  | Nacc1         | ENSMUSG000000001910 | 253  | 0.09 | 0.22 | 0.1  | 0.14 | 0.13 | 0.19 |
| chr8 | 87595567  | 87596035  | Dhps          | ENSMUSG000000060038 | 145  | 0.1  | 0.12 | 0.13 | 0.17 | 0.07 | 0.15 |
| chr8 | 87822955  | 87824012  | Vps35         | ENSMUSG000000031696 | -71  | 0.1  | 0.23 | 0.12 | 0.14 | 0.17 | 0.12 |

|      |           |           |               |                    |      |      |      |      |      |      |      |
|------|-----------|-----------|---------------|--------------------|------|------|------|------|------|------|------|
| chr8 | 96560520  | 96561014  | Nudt21        | ENSMUSG00000031754 | 172  | 0.43 | 0.19 | 0.16 | 0.28 | 0.29 | 0.18 |
| chr8 | 97855437  | 97856397  | Zfp319        | ENSMUSG00000046556 | -67  | 0.11 | 0.17 | 0.11 | 0.18 | 0.1  | 0.17 |
| chr8 | 98157369  | 98157789  | Gins3         | ENSMUSG00000031669 | 120  | 0.06 | 0.09 | 0.1  | 0.13 | 0.08 | 0.16 |
| chr8 | 108129186 | 108129577 | Fam65a        | ENSMUSG00000038604 | 252  | 0.09 | 0.21 | 0.1  | 0.16 | 0.12 | 0.14 |
| chr8 | 64069729  | 64070051  | Pald          | ENSMUSG00000058056 | 46   | 0.03 | 0.05 | 0.08 | 0.11 | 0.09 | 0.11 |
| chr8 | 86479091  | 86480091  | Gm10644       | ENSMUSG00000074219 | -487 | 0.13 | 0.12 | 0.12 | 0.22 | 0.11 | 0.14 |
| chr8 | 86590035  | 86591366  | Rfx1          | ENSMUSG00000031706 | -35  | 0.16 | 0.14 | 0.11 | 0.2  | 0.26 | 0.15 |
| chr8 | 87432419  | 87433113  | Dnase2a       | ENSMUSG0000003812  | 307  | 0.1  | 0.28 | 0.08 | 0.13 | 0.05 | 0.16 |
| chr8 | 4779289   | 4779590   | Shcbp1        | ENSMUSG00000022322 | 95   | 0.23 | 0.59 | 0.24 | NA   | 0.36 | 0.33 |
| chr8 | 87560677  | 87562208  | Tnpo2         | ENSMUSG00000031691 | 628  | 0.08 | 0.13 | 0.07 | 0.16 | 0.12 | 0.13 |
| chr8 | 122082297 | 122082832 | Mbtps1        | ENSMUSG00000031835 | 71   | 0.05 | 0.06 | 0.06 | 0.13 | 0.07 | 0.09 |
| chr8 | 67171403  | 67171966  | Cpe           | ENSMUSG00000037852 | 153  | 0.15 | 0.17 | 0.11 | 0.2  | 0.19 | 0.09 |
| chr8 | 97219725  | 97220216  | Plip          | ENSMUSG00000031775 | 172  | 0.06 | 0.08 | 0.1  | 0.18 | 0.08 | 0.13 |
| chr8 | 125589181 | 125589781 | Spg7          | ENSMUSG0000000738  | 300  | 0.08 | 0.08 | 0.1  | 0.15 | 0.11 | 0.14 |
| chr8 | 3279068   | 3279608   | Insr          | ENSMUSG00000005534 | 213  | 0.11 | 0.08 | 0.11 | 0.11 | 0.06 | 0.13 |
| chr8 | 12756830  | 12757610  | Atp11a        | ENSMUSG00000031441 | 206  | 0.05 | 0.06 | 0.08 | 0.11 | 0.06 | 0.09 |
| chr8 | 74082147  | 74082872  | Tmem221       | ENSMUSG00000043664 | 261  | 0.14 | 0.19 | 0.12 | 0.27 | 0.21 | 0.13 |
| chr8 | 98330517  | 98332038  | 4930513N10Rik | ENSMUSG00000074136 | 547  | 0.19 | 0.52 | 0.14 | 0.26 | 0.26 | 0.17 |
| chr8 | 109948514 | 109949092 | Nob1          | ENSMUSG0000003848  | 83   | 0.25 | 0.14 | 0.1  | 0.15 | 0.2  | 0.2  |
| chr8 | 35869649  | 35872814  | Dusp4         | ENSMUSG00000031530 | 880  | 0.09 | 0.13 | 0.11 | 0.16 | 0.11 | 0.17 |
| chr8 | 87447661  | 87447929  | Mast1         | ENSMUSG00000053693 | 218  | 0.78 | 0.75 | 0.67 | 0.73 | 0.82 | 0.84 |
| chr8 | 90885498  | 90886254  | Brd7          | ENSMUSG00000031660 | 37   | 0.11 | 0.08 | 0.12 | 0.15 | 0.15 | 0.15 |
| chr8 | 13974145  | 13975143  | 2610019F03Rik | ENSMUSG00000050052 | 99   | 0.1  | 0.12 | 0.11 | 0.12 | 0.12 | 0.13 |
| chr8 | 26126982  | 26128106  | Adam9         | ENSMUSG00000031555 | -260 | 0.08 | 0.08 | 0.12 | 0.18 | 0.11 | 0.22 |
| chr8 | 11550493  | 11550785  | Cars2         | ENSMUSG00000056228 | 105  | 0.04 | 0.04 | 0.15 | 0.11 | 0.08 | 0.1  |
| chr8 | 18950724  | 18950999  | Xkr5          | ENSMUSG00000039814 | 10   | 0.06 | 0.57 | 0.04 | 0.6  | 0.21 | 0.18 |
| chr8 | 27086843  | 27087269  | Hgsnat        | ENSMUSG00000037260 | 160  | 0.17 | 0.22 | 0.1  | 0.16 | 0.15 | 0.14 |
| chr8 | 74763913  | 74764538  | Ap1m1         | ENSMUSG0000003033  | 308  | 0.09 | 0.37 | 0.16 | 0.18 | 0.13 | 0.1  |
| chr8 | 86176449  | 86176755  | Gipc1         | ENSMUSG00000019433 | 25   | 0.15 | 0.07 | 0.13 | 0.11 | 0.06 | 0.18 |
| chr8 | 72757917  | 72758730  | Armc6         | ENSMUSG0000002343  | -298 | 0.05 | 0.07 | 0.11 | 0.17 | 0.08 | 0.16 |

|      |           |           |            |                     |      |      |      |      |      |      |      |
|------|-----------|-----------|------------|---------------------|------|------|------|------|------|------|------|
| chr8 | 74203474  | 74203871  | Jak3       | ENSMUSG00000031805  | 1438 | 0.19 | 0.09 | 0.11 | 0.08 | 0.25 | 0.12 |
| chr8 | 108424195 | 108424783 | Pskh1      | ENSMUSG00000048310  | 148  | 0.27 | 0.22 | 0.13 | 0.14 | 0.16 | 0.15 |
| chr8 | 113823405 | 113824377 | Rfwd3      | ENSMUSG00000033596  | 231  | 0.31 | 0.17 | 0.2  | 0.18 | 0.41 | 0.28 |
| chr8 | 13757502  | 13757876  | Cdc16      | ENSMUSG00000038416  | 13   | 0.07 | 0.14 | 0.08 | 0.17 | 0.09 | 0.16 |
| chr8 | 73429808  | 73430543  | Mtap1s     | ENSMUSG00000019261  | 302  | 0.13 | 0.17 | 0.09 | 0.15 | 0.16 | 0.16 |
| chr8 | 87500070  | 87502810  | Junb       | ENSMUSG00000052837  | 1177 | 0.07 | 0.1  | 0.12 | 0.19 | 0.08 | 0.17 |
| chr8 | 88078745  | 88079571  | Dnaja2     | ENSMUSG00000031701  | 12   | 0.09 | 0.14 | 0.09 | 0.1  | 0.08 | 0.14 |
| chr8 | 95351354  | 95351647  | Mmp2       | ENSMUSG00000031740  | 273  | 0.11 | 0.22 | 0.06 | 0.11 | 0.09 | 0.12 |
| chr8 | 107792012 | 107793896 | Hsf4       | ENSMUSG00000033249  | -747 | 0.08 | 0.15 | 0.13 | 0.15 | 0.1  | 0.19 |
| chr8 | 108042422 | 108043217 | Hsd11b2    | ENSMUSG00000031891  | 173  | 0.1  | 0.14 | 0.15 | 0.16 | 0.13 | 0.19 |
| chr8 | 108384361 | 108385039 | Nutf2      | ENSMUSG00000008450  | 166  | 0.1  | 0.17 | 0.12 | 0.25 | 0.13 | 0.16 |
| chr8 | 109960100 | 109960335 | Wwp2       | ENSMUSG00000031930  | -81  | 0.17 | 0.25 | 0.08 | 0.21 | 0.12 | 0.1  |
| chr8 | 23969368  | 23971049  | Myst3      | ENSMUSG00000031540  | 201  | 0.13 | 0.09 | 0.1  | 0.13 | 0.11 | 0.1  |
| chr8 | 49640337  | 49641434  | Odz3       | ENSMUSG00000031561  | 162  | 0.1  | 0.08 | 0.1  | 0.13 | 0.08 | 0.14 |
| chr8 | 73051526  | 73051967  | Fkbp8      | ENSMUSG00000019428  | 123  | 0.08 | 0.17 | 0.06 | 0.28 | 0.04 | 0.15 |
| chr8 | 73320715  | 73321858  | Mast3      | ENSMUSG00000031833  | -441 | 0.1  | 0.08 | 0.08 | 0.08 | 0.14 | 0.11 |
| chr8 | 101939395 | 101940626 | Cdh8       | ENSMUSG00000036510  | 209  | 0.08 | 0.09 | 0.12 | 0.17 | 0.1  | 0.16 |
| chr8 | 107788300 | 107788576 | Tradd      | ENSMUSG00000031887  | 43   | 0.07 | 0.06 | 0.08 | 0.17 | 0.1  | 0.12 |
| chr8 | 9977664   | 9978197   | Lig4       | ENSMUSG00000049717  | -244 | 0.08 | 0.18 | 0.08 | 0.11 | 0.13 | 0.16 |
| chr8 | 26950796  | 26951293  | Ash2l      | ENSMUSG00000031575  | -115 | 0.09 | 0.09 | 0.1  | 0.12 | 0.11 | 0.12 |
| chr8 | 73278802  | 73279160  | Rab3a      | ENSMUSG00000031840  | 358  | 0.23 | 0.07 | 0.14 | 0.26 | 0.16 | 0.15 |
| chr8 | 74093473  | 74093863  | Slc27a1    | ENSMUSG00000031808  | 842  | 0.05 | 0.32 | 0.14 | 0.24 | 0.08 | 0.2  |
| chr8 | 86780783  | 86781267  | Mri1       | ENSMUSG00000004996  | 121  | 0.04 | 0.06 | 0.08 | 0.14 | 0.06 | 0.07 |
| chr8 | 89996078  | 89997586  | Cbln1      | ENSMUSG00000031654  | -547 | 0.12 | 0.15 | 0.11 | 0.16 | 0.15 | 0.16 |
| chr8 | 108404734 | 108405179 | Ecd4       | ENSMUSG00000036270  | 175  | 0.08 | 0.05 | 0.09 | 0.14 | 0.11 | 0.15 |
| chr8 | 71923288  | 71923667  | RNaseP_nuc | ENSMUSG000000088329 | -147 | 0.1  | 0.08 | 0.15 | 0.17 | 0.08 | 0.1  |
| chr8 | 118231935 | 118232173 | Maf        | ENSMUSG00000055435  | -360 | 0.06 | 0.11 | 0.1  | 0.25 | 0.14 | 0.18 |
| chr8 | 67471050  | 67471688  | Tmem192    | ENSMUSG00000025521  | 285  | 0.12 | 0.16 | 0.1  | 0.11 | 0.09 | 0.11 |
| chr8 | 74194936  | 74195742  | Unc13a     | ENSMUSG00000034799  | 207  | 0.11 | 0.11 | 0.21 | 0.11 | 0.08 | 0.16 |
| chr8 | 87213518  | 87213891  | Trmt1      | ENSMUSG00000001909  | 173  | 0.34 | 0.33 | 0.13 | 0.21 | 0.3  | 0.19 |

|      |           |           |               |                    |       |      |      |      |      |      |      |
|------|-----------|-----------|---------------|--------------------|-------|------|------|------|------|------|------|
| chr8 | 131209220 | 131210290 | Itgb1         | ENSMUSG00000025809 | 201   | 0.11 | 0.13 | 0.09 | 0.15 | 0.09 | 0.09 |
| chr8 | 64238543  | 64238891  | Palld         | ENSMUSG00000058056 | 169   | 0.13 | 0.2  | 0.26 | 0.18 | 0.1  | 0.13 |
| chr8 | 24084904  | 24086179  | Ank1          | ENSMUSG00000031543 | 225   | 0.14 | 0.14 | 0.1  | 0.17 | 0.15 | 0.15 |
| chr8 | 59029517  | 59030229  | BC088983      | ENSMUSG00000038215 | -277  | 0.29 | 0.21 | 0.08 | 0.06 | 0.18 | 0.1  |
| chr8 | 88016429  | 88017115  | Gpt2          | ENSMUSG00000031700 | 297   | 0.11 | 0.12 | 0.07 | 0.08 | 0.17 | 0.18 |
| chr8 | 125966853 | 125967217 | Def8          | ENSMUSG00000001482 | 149   | 0.14 | 0.11 | 0.07 | 0.2  | 0.2  | 0.12 |
| chr8 | 11187794  | 11188298  | Gm15418       | ENSMUSG00000085573 | 291   | 0.04 | 0.05 | 0.07 | 0.09 | 0.06 | 0.09 |
| chr8 | 82581793  | 82582191  | Hhip          | ENSMUSG00000064325 | -87   | 0.1  | 0.07 | 0.1  | 0.21 | 0.07 | 0.14 |
| chr8 | 87504149  | 87504389  | Junb          | ENSMUSG00000052837 | -1652 | 0.13 | 0.22 | 0.27 | 0.11 | 0.2  | 0.25 |
| chr8 | 41596450  | 41597673  | Cnot7         | ENSMUSG00000031601 | -403  | 0.09 | 0.11 | 0.09 | 0.13 | 0.11 | 0.09 |
| chr8 | 47296188  | 47296466  | Slc25a4       | ENSMUSG00000031633 | 57    | 0.12 | 0.13 | 0.12 | 0.23 | 0.07 | 0.15 |
| chr8 | 72963215  | 72963727  | Crtc1         | ENSMUSG00000003575 | 3     | 0.15 | 0.05 | 0.08 | 0.16 | 0.12 | 0.11 |
| chr8 | 123157611 | 123158531 | 1190005I06Rik | ENSMUSG00000043687 | 192   | 0.14 | 0.15 | 0.11 | 0.13 | 0.12 | 0.13 |
| chr8 | 75876484  | 75877810  | Large         | ENSMUSG00000004383 | -629  | 0.08 | 0.08 | 0.13 | 0.13 | 0.07 | 0.14 |
| chr8 | 93352585  | 93352881  | Chd9          | ENSMUSG00000056608 | -1    | 0.07 | 0.83 | 0.1  | 0.28 | 0.2  | 0.18 |
| chr8 | 93657332  | 93658121  | Aktip         | ENSMUSG00000031667 | 115   | 0.18 | 0.39 | 0.14 | 0.2  | 0.14 | 0.18 |
| chr8 | 96622043  | 96622549  | Bbs2          | ENSMUSG00000031755 | 415   | 0.1  | 0.25 | 0.17 | 0.14 | 0.19 | 0.13 |
| chr8 | 15011029  | 15012015  | Kbtbd11       | ENSMUSG00000055675 | 497   | 0.09 | 0.09 | 0.07 | 0.12 | 0.14 | 0.11 |
| chr8 | 72332522  | 72332736  | Gmip          | ENSMUSG00000036246 | 51    | 0.08 | 0.18 | 0.12 | 0.16 | 0.14 | 0.15 |
| chr8 | 72655201  | 72655442  | Nr2c2ap       | ENSMUSG00000071078 | 89    | 0.05 | 0.07 | 0.08 | 0.18 | 0.06 | 0.18 |
| chr8 | 72853938  | 72854175  | Gdf1          | ENSMUSG00000055694 | 392   | 0.38 | 0.35 | 0.4  | 0.59 | 0.32 | 0.5  |
| chr8 | 109459315 | 109460640 | Sntb2         | ENSMUSG00000041308 | 327   | 0.16 | 0.13 | 0.16 | 0.38 | 0.13 | 0.25 |
| chr8 | 72898372  | 72899284  | Comp          | ENSMUSG00000031849 | 1371  | 0.13 | 0.1  | 0.11 | 0.1  | 0.1  | 0.13 |
| chr8 | 26213320  | 26213641  | Plekha2       | ENSMUSG00000031557 | -814  | 0.5  | 0.71 | 0.49 | 0.51 | 0.25 | 0.31 |
| chr8 | 89269224  | 89270275  | Gm10638       | ENSMUSG00000074178 | 151   | 0.08 | 0.14 | 0.08 | 0.1  | 0.07 | 0.09 |
| chr8 | 26864250  | 26865025  | Ddhd2         | ENSMUSG00000061313 | 115   | 0.09 | 0.08 | 0.09 | 0.14 | 0.11 | 0.13 |
| chr8 | 73011069  | 73011406  | Tmem59l       | ENSMUSG00000035964 | 20    | 0.33 | 0.42 | 0.21 | 0.26 | 0.5  | 0.28 |
| chr8 | 97844400  | 97844657  | Tepp          | ENSMUSG00000090206 | 132   | 0.15 | 0.11 | 0.13 | 0.18 | 0.1  | 0.11 |
| chr8 | 98239699  | 98240312  | Setd6         | ENSMUSG00000031671 | 190   | 0.15 | 0.25 | 0.14 | 0.22 | 0.17 | 0.12 |
| chr8 | 109554870 | 109555835 | Gm16208       | ENSMUSG00000085464 | -264  | 0.08 | 0.1  | 0.11 | 0.13 | 0.1  | 0.17 |

|      |           |           |               |                    |      |      |      |      |      |      |      |
|------|-----------|-----------|---------------|--------------------|------|------|------|------|------|------|------|
| chr8 | 41392966  | 41393803  | Efha2         | ENSMUSG00000039478 | -21  | 0.2  | 0.11 | 0.07 | 0.11 | 0.07 | 0.11 |
| chr8 | 59800178  | 59801229  | Hand2         | ENSMUSG00000038193 | 923  | 0.1  | 0.05 | 0.16 | 0.19 | 0.09 | 0.17 |
| chr8 | 97361922  | 97362578  | Ciapi1        | ENSMUSG00000031781 | -308 | 0.29 | 0.2  | 0.09 | 0.24 | 0.26 | 0.13 |
| chr8 | 113917355 | 113917888 | Fa2h          | ENSMUSG00000033579 | 97   | 0.06 | 0.07 | 0.08 | 0.09 | 0.08 | 0.1  |
| chr8 | 86191949  | 86192677  | Ptger1        | ENSMUSG00000019464 | 1551 | 0.41 | 0.42 | 0.33 | 0.17 | 0.27 | 0.1  |
| chr8 | 97190488  | 97191159  | Arl2bp        | ENSMUSG00000031776 | 273  | 0.07 | 0.1  | 0.13 | 0.15 | 0.09 | 0.11 |
| chr8 | 87163233  | 87163843  | Cacna1a       | ENSMUSG00000034656 | 648  | 0.23 | 0.29 | 0.13 | 0.3  | 0.11 | 0.3  |
| chr8 | 108231464 | 108232045 | E130303B06Rik | ENSMUSG00000013155 | 79   | 0.29 | 0.07 | 0.17 | NA   | 0.11 | NA   |
| chr8 | 79423172  | 79424651  | Nr3c2         | ENSMUSG00000031618 | 570  | 0.08 | 0.09 | 0.11 | 0.14 | 0.1  | 0.15 |
| chr8 | 126382892 | 126383890 | 1700054N08Rik | ENSMUSG00000031971 | 39   | 0.06 | 0.1  | 0.11 | 0.14 | 0.08 | 0.11 |
| chr8 | 73131956  | 73132323  | Ssbp4         | ENSMUSG00000070003 | 74   | 0.18 | 0.13 | 0.08 | 0.23 | 0.12 | 0.15 |
| chr8 | 90661724  | 90662410  | Heatr3        | ENSMUSG00000031657 | 313  | 0.11 | 0.28 | 0.13 | 0.21 | 0.09 | 0.17 |
| chr8 | 19535156  | 19535754  | Gm16425       | ENSMUSG00000083218 | -449 | 0.13 | 0.12 | 0.18 | 0.29 | 0.1  | 0.14 |
| chr8 | 23816811  | 23817156  | Ikbbk         | ENSMUSG00000031537 | 14   | 0.07 | 0.09 | 0.09 | 0.11 | 0.09 | 0.09 |
| chr8 | 23918337  | 23918850  | 1700041G16Rik | ENSMUSG00000054822 | -154 | 0.08 | 0.13 | 0.16 | 0.13 | 0.1  | 0.12 |
| chr8 | 86566208  | 86566552  | Il27ra        | ENSMUSG00000005465 | 94   | 0.06 | 0.1  | 0.08 | 0.08 | 0.09 | 0.16 |
| chr8 | 107033159 | 107033846 | Ccdc79        | ENSMUSG00000052616 | 280  | 0.11 | 0.21 | 0.1  | 0.2  | 0.07 | 0.18 |
| chr8 | 120807468 | 120808485 | Cdh13         | ENSMUSG00000031841 | 343  | 0.13 | 0.17 | 0.15 | 0.12 | 0.11 | 0.17 |
| chr8 | 125842247 | 125842518 | Fanca         | ENSMUSG00000032815 | 78   | 0.57 | 1    | 0.18 | 0.43 | 0.33 | 0.18 |
| chr8 | 9976120   | 9976554   | Lig4          | ENSMUSG00000049717 | -14  | 0.07 | 0.17 | 0.13 | 0.19 | 0.1  | 0.17 |
| chr8 | 42218802  | 42219476  | Mtus1         | ENSMUSG00000045636 | -67  | 0.09 | 0.1  | 0.1  | 0.14 | 0.1  | 0.12 |
| chr8 | 109619851 | 109620497 | Terf2         | ENSMUSG00000031921 | -84  | 0.22 | 0.13 | 0.1  | 0.22 | 0.18 | 0.12 |
| chr8 | 122128920 | 122129189 | Taf1c         | ENSMUSG00000031832 | 68   | 0.13 | 0.07 | 0.09 | 0.21 | 0.11 | 0.13 |
| chr8 | 71258649  | 71259154  | Csgalnact1    | ENSMUSG00000036356 | 100  | 0.21 | 0.13 | 0.12 | 0.2  | 0.16 | 0.13 |
| chr8 | 77633207  | 77633810  | Mcm5          | ENSMUSG00000005410 | 81   | 0.17 | 0.12 | 0.13 | 0.15 | 0.23 | 0.13 |
| chr8 | 97958308  | 97958987  | Gil3          | ENSMUSG00000031796 | 122  | 0.13 | 0.15 | 0.1  | 0.14 | 0.16 | 0.15 |
| chr8 | 106772301 | 106772525 | Tk2           | ENSMUSG00000035824 | 45   | 0.06 | 0.08 | 0.11 | 0.17 | 0.08 | 0.19 |
| chr8 | 108089411 | 108090820 | Atp6v0d1      | ENSMUSG00000013160 | -168 | 0.13 | 0.17 | 0.12 | 0.18 | 0.14 | 0.14 |
| chr8 | 123112774 | 123113437 | Gins2         | ENSMUSG00000031821 | -225 | 1    | 0.5  | 0.09 | 0.22 | 0.25 | 0.16 |
| chr8 | 73183337  | 73183753  | Pgpep1        | ENSMUSG00000056204 | 35   | 0.05 | 0.07 | 0.08 | 0.12 | 0.06 | 0.13 |

|      |           |           |               |                     |       |      |      |      |      |      |      |
|------|-----------|-----------|---------------|---------------------|-------|------|------|------|------|------|------|
| chr8 | 74446517  | 74447101  | Zfp617        | ENSMUSG00000066880  | 58    | 0.1  | 0.16 | 0.09 | 0.22 | 0.13 | 0.14 |
| chr8 | 95484306  | 95485313  | Slc6a2        | ENSMUSG00000055368  | -137  | 0.05 | 0.09 | 0.09 | 0.12 | 0.06 | 0.13 |
| chr8 | 119681520 | 119682549 | Gan           | ENSMUSG00000052557  | -1    | 0.12 | 0.23 | 0.15 | 0.18 | 0.15 | 0.19 |
| chr8 | 123062582 | 123062822 | Gse1          | ENSMUSG00000031822  | 1373  | 0.06 | 0.1  | 0.09 | 0.12 | 0.08 | 0.09 |
| chr8 | 42502095  | 42502543  | Frg1          | ENSMUSG00000031590  | 153   | 0.16 | 0.14 | 0.1  | 0.16 | 0.13 | 0.18 |
| chr8 | 92871607  | 92872104  | Tox3          | ENSMUSG00000043668  | 170   | 0.15 | 0.14 | 0.08 | 0.09 | 0.18 | 0.08 |
| chr8 | 119516959 | 119517525 | Gcsh          | ENSMUSG00000034424  | 195   | 0.26 | 0.3  | 0.13 | 0.18 | 0.27 | 0.16 |
| chr8 | 35217452  | 35217915  | Tmem66        | ENSMUSG00000031532  | 66    | 0.04 | 0.11 | 0.09 | 0.17 | 0.07 | 0.18 |
| chr8 | 41508769  | 41509654  | Zdhc2         | ENSMUSG00000039470  | 42    | 0.14 | 0.21 | 0.09 | 0.15 | 0.12 | 0.11 |
| chr8 | 87550723  | 87551284  | 2310036O22Rik | ENSMUSG00000041203  | 271   | 0.25 | 0.23 | 0.09 | 0.22 | 0.27 | 0.16 |
| chr8 | 124102350 | 124103029 | Fbxo31        | ENSMUSG00000031811  | 17    | 0.05 | 0.05 | 0.11 | 0.13 | 0.06 | 0.1  |
| chr8 | 126329884 | 126330191 | Rab4a         | ENSMUSG00000019478  | 152   | 0.03 | 0.06 | 0.1  | 0.16 | 0.05 | 0.22 |
| chr8 | 26629220  | 26629950  | Fgfr1         | ENSMUSG00000031565  | 321   | 0.12 | 0.2  | 0.12 | 0.18 | 0.13 | 0.18 |
| chr8 | 73267911  | 73268490  | Pde4c         | ENSMUSG00000031842  | 1222  | 0.37 | 0.33 | 0.12 | 0.21 | 0.27 | 0.11 |
| chr8 | 74011680  | 74011889  | Gtpbp3        | ENSMUSG00000007610  | -218  | 0.25 | 0.11 | 0.14 | 0.12 | 0.31 | 0.08 |
| chr8 | 83866329  | 83866577  | Inpp4b        | ENSMUSG00000037940  | -2    | 1    | 0.17 | 0.1  | 0.09 | 0.28 | 0.08 |
| chr8 | 124114137 | 124114809 | Map1lc3b      | ENSMUSG00000031812  | 105   | 0.17 | 0.15 | 0.11 | 0.14 | 0.15 | 0.16 |
| chr8 | 69211821  | 69212070  | Npy5r         | ENSMUSG00000044014  | 48    | 0.11 | 0.12 | 0.13 | 0.17 | 0.04 | 0.25 |
| chr8 | 87356043  | 87356617  | Dand5         | ENSMUSG00000053226  | -190  | 0.28 | 0.07 | 0.07 | 0.16 | 0.18 | 0.13 |
| chr8 | 107748967 | 107749317 | D230025D16Rik | ENSMUSG00000031889  | 97    | 0.04 | 0.11 | 0.08 | 0.09 | 0.06 | 0.12 |
| chr8 | 23703799  | 23704589  | Vdac3         | ENSMUSG00000008892  | 36    | 0.08 | 0.09 | 0.08 | 0.13 | 0.09 | 0.15 |
| chr8 | 46418519  | 46418801  | Cyp4v3        | ENSMUSG000000079057 | -90   | 0.08 | 0.09 | 0.13 | 0.24 | 0.16 | 0.29 |
| chr8 | 73000508  | 73000964  | Kihl26        | ENSMUSG00000055707  | 106   | 0.06 | 0.15 | 0.11 | 0.13 | 0.08 | 0.15 |
| chr8 | 75095808  | 75096078  | Tmem38a       | ENSMUSG00000031791  | -59   | 0.2  | 0.19 | 0.16 | 0.16 | 0.41 | NA   |
| chr8 | 86535032  | 86536655  | 2210011C24Rik | ENSMUSG00000074217  | -502  | 0.09 | 0.14 | 0.12 | 0.13 | 0.1  | 0.16 |
| chr8 | 87426572  | 87427522  | Klf1          | ENSMUSG00000054191  | 1220  | 0.13 | 0.12 | 0.13 | 0.18 | 0.15 | 0.19 |
| chr8 | 96910078  | 96910663  | Herpud1       | ENSMUSG00000031770  | 32    | 0.04 | 0.06 | 0.1  | 0.11 | 0.08 | 0.18 |
| chr8 | 3500174   | 3500966   | Mcoln1        | ENSMUSG00000004567  | 113   | 0.1  | 0.2  | 0.12 | 0.15 | 0.14 | 0.15 |
| chr8 | 87469629  | 87469960  | Rtbdn         | ENSMUSG00000048617  | -1096 | 0.17 | 0.15 | 0.12 | 0.11 | 0.2  | 0.18 |
| chr8 | 108489542 | 108490033 | Slc12a4       | ENSMUSG00000017765  | 157   | 0.05 | 0.08 | 0.09 | 0.12 | 0.07 | 0.11 |

|      |           |           |               |                     |      |      |      |      |      |      |      |
|------|-----------|-----------|---------------|---------------------|------|------|------|------|------|------|------|
| chr8 | 109416908 | 109417810 | Chtf8         | ENSMUSG00000046691  | -244 | 0.14 | 0.12 | 0.1  | 0.09 | 0.12 | 0.18 |
| chr8 | 127316192 | 127318828 | Trim67        | ENSMUSG00000036913  | 591  | 0.13 | 0.12 | 0.12 | 0.16 | 0.12 | 0.15 |
| chr8 | 32200078  | 32200548  | Dusp26        | ENSMUSG00000039661  | 203  | 0.09 | 0.05 | 0.07 | 0.16 | 0.07 | 0.16 |
| chr8 | 48497756  | 48499280  | Gm10083       | ENSMUSG00000060559  | 35   | 0.09 | 0.12 | 0.11 | 0.14 | 0.1  | 0.17 |
| chr8 | 114167271 | 114167876 | Zfp1          | ENSMUSG00000055835  | 230  | 0.09 | 0.21 | 0.12 | 0.15 | 0.11 | 0.13 |
| chr8 | 86264915  | 86265224  | Cd97          | ENSMUSG00000002885  | -1   | 0.06 | 0.08 | 0.09 | 0.11 | 0.05 | 0.1  |
| chr8 | 96702796  | 96703455  | Mt1           | ENSMUSG000000031765 | 136  | 0.08 | 0.06 | 0.15 | 0.17 | 0.1  | 0.18 |
| chr8 | 114516047 | 114516308 | Adat1         | ENSMUSG000000031949 | -29  | 0.12 | 0.17 | 0.06 | NA   | 0.25 | 0.33 |
| chr8 | 126957651 | 126958682 | Pgbd5         | ENSMUSG000000050751 | -330 | 0.08 | 0.1  | 0.08 | 0.13 | 0.08 | 0.11 |
| chr8 | 23915940  | 23916206  | Ap3m2         | ENSMUSG000000031539 | 53   | 0.15 | 0.22 | 0.13 | 0.25 | 0.22 | 0.18 |
| chr8 | 26212399  | 26212983  | Plekha2       | ENSMUSG000000031557 | -234 | 0.26 | 0.22 | 0.17 | 0.21 | 0.25 | 0.16 |
| chr8 | 47637095  | 47637547  | Mif1ip        | ENSMUSG000000031629 | -88  | 0.18 | 0.12 | 0.13 | 0.15 | 0.16 | 0.17 |
| chr8 | 63111094  | 63112301  | Mfap3l        | ENSMUSG000000031647 | 73   | 0.12 | 0.17 | 0.1  | 0.13 | 0.12 | 0.14 |
| chr8 | 71317500  | 71318145  | Ints10        | ENSMUSG000000031864 | -6   | 0.07 | 0.06 | 0.12 | 0.13 | 0.08 | 0.15 |
| chr8 | 67212216  | 67212701  | Sc4mol        | ENSMUSG000000031604 | -113 | 0.14 | 0.12 | 0.11 | 0.15 | 0.1  | 0.12 |
| chr8 | 72519755  | 72520873  | Gatad2a       | ENSMUSG000000036180 | -36  | 0.1  | 0.11 | 0.12 | 0.18 | 0.09 | 0.13 |
| chr8 | 121918449 | 121919369 | Mlycd         | ENSMUSG000000074064 | 131  | 0.12 | 0.12 | 0.08 | 0.2  | 0.11 | 0.12 |
| chr8 | 122223811 | 122224034 | Atp2c2        | ENSMUSG000000034112 | 13   | 0.12 | 0.17 | 0.09 | 0.09 | 0.15 | 0.17 |
| chr8 | 4166553   | 4166994   | Evi5l         | ENSMUSG000000011832 | 206  | 0.52 | 0.63 | 0.11 | 0.19 | 0.46 | 0.27 |
| chr8 | 73316049  | 73316630  | Mast3         | ENSMUSG000000031833 | -7   | 0.09 | 0.05 | 0.1  | 0.12 | 0.08 | 0.1  |
| chr8 | 85855824  | 85856618  | Elmod2        | ENSMUSG000000035151 | 82   | 0.08 | 0.1  | 0.11 | 0.14 | 0.07 | 0.13 |
| chr8 | 37676631  | 37677177  | Dlc1          | ENSMUSG000000031523 | 24   | 0.05 | 0.06 | 0.07 | 0.08 | 0.08 | 0.22 |
| chr8 | 72314915  | 72315666  | Atp13a1       | ENSMUSG000000031862 | 228  | 0.09 | 0.1  | 0.1  | 0.11 | 0.08 | 0.15 |
| chr8 | 96958155  | 96958361  | 9330175E14Rik | ENSMUSG000000074153 | -76  | 0.07 | NA   | 0.14 | 0.12 | 0.13 | 0.09 |
| chr8 | 124353072 | 124353610 | Klhdc4        | ENSMUSG000000040263 | 39   | 0.17 | 0.33 | 0.09 | 0.17 | 0.14 | 0.19 |
| chr8 | 30329598  | 30330484  | Unc5d         | ENSMUSG000000063626 | -231 | 0.08 | 0.08 | 0.11 | 0.22 | 0.09 | 0.17 |
| chr8 | 90796227  | 90796753  | Adcy7         | ENSMUSG000000031659 | 188  | 0.09 | 0.1  | 0.11 | 0.13 | 0.11 | 0.12 |
| chr8 | 91564906  | 91568244  | Sall1         | ENSMUSG000000031665 | 1486 | 0.08 | 0.1  | 0.1  | 0.16 | 0.08 | 0.12 |
| chr8 | 98349268  | 98349483  | Gm10094       | ENSMUSG000000061104 | 121  | 0.88 | 0.88 | 0.5  | 0.48 | 0.93 | 0.77 |
| chr8 | 108674129 | 108674427 | Pla2g15       | ENSMUSG000000031903 | -21  | 0.19 | 0.36 | 0.08 | 0.21 | 0.25 | 0.17 |



|      |           |           |               |                    |       |      |      |      |      |      |      |
|------|-----------|-----------|---------------|--------------------|-------|------|------|------|------|------|------|
| chr8 | 123640112 | 123642093 | Foxc2         | ENSMUSG00000046714 | 1031  | 0.1  | 0.11 | 0.11 | 0.18 | 0.09 | 0.16 |
| chr8 | 128946175 | 128946764 | 1810063B05Rik | ENSMUSG00000051671 | 68    | 0.22 | 0.41 | 0.12 | 0.16 | 0.25 | 0.21 |
| chr8 | 47060482  | 47060908  | 1700029J07Rik | ENSMUSG00000071103 | -89   | 0.19 | 0.36 | 0.14 | 0.15 | 0.21 | 0.23 |
| chr8 | 73062590  | 73063833  | Eil           | ENSMUSG00000070002 | -363  | 0.2  | 0.21 | 0.15 | 0.18 | 0.12 | 0.24 |
| chr8 | 106694408 | 106695163 | Bean1         | ENSMUSG00000031872 | 372   | 0.21 | 0.39 | 0.21 | 0.15 | 0.23 | 0.15 |
| chr8 | 24780088  | 24780327  | Zmat4         | ENSMUSG00000037492 | 77    | 0.23 | 0.14 | 0.13 | 0.24 | 0.2  | 0.23 |
| chr8 | 73196956  | 73197605  | Lsm4          | ENSMUSG00000031848 | 133   | 0.09 | 0.36 | 0.09 | 0.17 | 0.11 | 0.13 |
| chr8 | 90722882  | 90724474  | Papd5         | ENSMUSG00000036779 | 566   | 0.08 | 0.08 | 0.08 | 0.12 | 0.08 | 0.12 |
| chr8 | 122434582 | 122435397 | Usp10         | ENSMUSG00000031826 | 275   | 0.1  | 0.11 | 0.09 | 0.16 | 0.09 | 0.16 |
| chr8 | 108534808 | 108535433 | Ddx28         | ENSMUSG00000045538 | 266   | 0.07 | 0.11 | 0.14 | 0.23 | 0.09 | 0.14 |
| chr8 | 125091578 | 125092283 | Cdt1          | ENSMUSG00000006585 | 15    | 0.11 | 0.12 | 0.09 | 0.14 | 0.12 | 0.12 |
| chr8 | 36888630  | 36889912  | Cldn23        | ENSMUSG00000055976 | 342   | 0.08 | 0.09 | 0.1  | 0.14 | 0.09 | 0.16 |
| chr8 | 73397172  | 73397456  | Ccdc124       | ENSMUSG00000007721 | 75    | 0.14 | 0.09 | 0.08 | 0.18 | 0.16 | 0.18 |
| chr8 | 106966325 | 106966962 | Dync1li2      | ENSMUSG00000035770 | 304   | 0.09 | 0.15 | 0.1  | 0.13 | 0.08 | 0.18 |
| chr8 | 32222222  | 32222765  | Rnf122        | ENSMUSG00000039328 | 201   | 0.13 | 0.13 | 0.11 | 0.23 | 0.11 | 0.13 |
| chr8 | 72411773  | 72412039  | Yjefn3        | ENSMUSG00000048967 | 178   | 0.5  | NA   | 0.5  | NA   | 1    | 0.6  |
| chr8 | 73012256  | 73012651  | Tmem59l       | ENSMUSG00000035964 | -1196 | 0.35 | 0.26 | 0.13 | 0.36 | 0.31 | 0.27 |
| chr8 | 23521953  | 23522242  | Mrps31        | ENSMUSG00000031533 | 285   | 0.09 | 0.06 | 0.09 | 0.18 | 0.1  | 0.09 |
| chr8 | 77736687  | 77737967  | Rasd2         | ENSMUSG00000034472 | -516  | 0.1  | 0.1  | 0.1  | 0.12 | 0.12 | 0.16 |
| chr8 | 94325766  | 94326101  | Irx3          | ENSMUSG00000031734 | 33    | 0.15 | 0.12 | 0.1  | 0.17 | 0.17 | 0.18 |
| chr8 | 96696229  | 96696745  | Mt2           | ENSMUSG00000031762 | -31   | 0.07 | 0.07 | 0.06 | 0.1  | 0.08 | 0.17 |
| chr8 | 113262682 | 113262999 | Mtss1l        | ENSMUSG00000033763 | 1823  | 0.8  | 0.83 | 0.38 | 0.45 | 0.78 | 0.63 |
| chr8 | 24347785  | 24348377  | Gins4         | ENSMUSG00000031546 | 59    | 0.13 | 0.06 | 0.1  | 0.12 | 0.15 | 0.15 |
| chr8 | 49075237  | 49076677  | Wwc2          | ENSMUSG00000031563 | -60   | 0.17 | 0.17 | 0.14 | 0.2  | 0.18 | 0.18 |
| chr8 | 74743574  | 74743961  | Fam32a        | ENSMUSG00000030309 | 138   | 0.07 | 0.1  | 0.14 | 0.22 | 0.08 | 0.24 |
| chr8 | 80961119  | 80961333  | Pou4f2        | ENSMUSG00000031688 | -682  | 0.18 | 0.27 | 0.12 | 0.15 | 0.2  | 0.22 |
| chr8 | 128998231 | 128999029 | Gm17296       | ENSMUSG00000090290 | 335   | 0.06 | 0.06 | 0.06 | 0.11 | 0.06 | 0.11 |
| chr8 | 112302422 | 112303259 | Ap1g1         | ENSMUSG00000031731 | 386   | 0.06 | 0.1  | 0.08 | 0.12 | 0.06 | 0.12 |
| chr8 | 125736324 | 125736977 | Chmp1a        | ENSMUSG00000000743 | 10    | 0.18 | 0.2  | 0.1  | 0.16 | 0.17 | 0.13 |
| chr8 | 34842251  | 34843059  | 1700104B16Rik | ENSMUSG00000049476 | -369  | 0.13 | 0.38 | 0.17 | 0.26 | 0.14 | 0.17 |

|      |           |           |               |                     |       |      |      |      |      |      |      |
|------|-----------|-----------|---------------|---------------------|-------|------|------|------|------|------|------|
| chr8 | 72409905  | 72410192  | Cilp2         | ENSMUSG00000044006  | 1538  | 0.13 | 0.08 | 0.15 | 0.17 | 0.14 | 0.23 |
| chr8 | 108939155 | 108939458 | Zfp90         | ENSMUSG00000031907  | 67    | 0.07 | 0.15 | 0.07 | 0.17 | 0.08 | 0.12 |
| chr8 | 3516773   | 3517156   | Pnpla6        | ENSMUSG00000004565  | 1580  | 0.12 | 0.33 | 0.12 | 0.43 | 0.16 | 0.21 |
| chr8 | 4238413   | 4239258   | Map2k7        | ENSMUSG00000002948  | 95    | 0.19 | 0.48 | 0.08 | 0.25 | 0.24 | 0.2  |
| chr8 | 36650637  | 36651827  | Mfhas1        | ENSMUSG000000070056 | 380   | 0.14 | 0.11 | 0.1  | 0.15 | 0.14 | 0.12 |
| chr8 | 73133151  | 73133753  | Ssbp4         | ENSMUSG000000070003 | -1239 | 0.06 | 0.04 | 0.1  | 0.21 | 0.08 | 0.12 |
| chr8 | 81344627  | 81345146  | Lsm6          | ENSMUSG000000031683 | 111   | 0.06 | 0.07 | 0.09 | 0.13 | 0.07 | 0.09 |
| chr8 | 128421975 | 128422284 | Pcnx12        | ENSMUSG000000060212 | 64    | 0.09 | 0.16 | 0.14 | 0.25 | 0.1  | 0.19 |
| chr8 | 34627489  | 34627924  | Tex15         | ENSMUSG000000009628 | -90   | 0.04 | 0.06 | 0.11 | 0.09 | 0.05 | 0.12 |
| chr8 | 59989945  | 59991673  | Hmgb2         | ENSMUSG000000054717 | 169   | 0.07 | 0.17 | 0.1  | 0.21 | 0.1  | 0.14 |
| chr8 | 73029654  | 73029963  | 2810428115Rik | ENSMUSG000000058833 | 199   | 0.07 | 0.08 | 0.11 | 0.17 | 0.08 | 0.16 |
| chr8 | 91220598  | 91221345  | Cyld          | ENSMUSG000000036712 | 44    | 0.28 | 0.19 | 0.14 | NA   | 0.33 | 0.28 |
| chr8 | 4324437   | 4325527   | Elavl1        | ENSMUSG000000040028 | 118   | 0.08 | 0.11 | 0.13 | 0.25 | 0.13 | 0.16 |
| chr8 | 13200396  | 13200614  | Grtp1         | ENSMUSG000000038515 | 115   | 0.36 | NA   | 0.43 | 1    | 0.43 | 0.33 |
| chr8 | 97441395  | 97442146  | Ccdc102a      | ENSMUSG000000063605 | -349  | 0.09 | 0.1  | 0.07 | 0.16 | 0.09 | 0.12 |
| chr8 | 125201683 | 125202823 | Cbfa2t3       | ENSMUSG00000006362  | -281  | 0.07 | 0.14 | 0.09 | 0.09 | 0.07 | 0.12 |
| chr8 | 71404932  | 71405376  | Lpl           | ENSMUSG000000015568 | 598   | 0.25 | NA   | 0.08 | 0.23 | 0.12 | 0.23 |
| chr8 | 73920755  | 73921044  | 5430437P03Rik | ENSMUSG000000031820 | 145   | 0.5  | 0.29 | 0.1  | 0.31 | 0.31 | 0.29 |
| chr8 | 63369022  | 63369475  | 2700029M09Rik | ENSMUSG000000038005 | 33    | 0.17 | 0.08 | 0.1  | 0.16 | 0.12 | 0.09 |
| chr8 | 73992850  | 73993611  | Dda1          | ENSMUSG000000074247 | 132   | 0.12 | 0.13 | 0.15 | 0.14 | 0.12 | 0.15 |
| chr8 | 113262299 | 113262516 | Mtss1l        | ENSMUSG000000033763 | 1390  | 0.88 | 0.82 | 0.59 | 0.56 | 0.86 | 0.88 |
| chr8 | 3451857   | 3452227   | Arhgef18      | ENSMUSG000000004568 | 1284  | 0.94 | 0.93 | 0.87 | 0.9  | 0.96 | 0.93 |
| chr8 | 112216651 | 112217640 | 2400003C14Rik | ENSMUSG000000031729 | -8    | 0.07 | 0.06 | 0.1  | 0.22 | 0.08 | 0.15 |
| chr8 | 87956132  | 87956897  | 4921524J17Rik | ENSMUSG000000036934 | 226   | 0.22 | 0.11 | 0.16 | 0.27 | 0.33 | 0.22 |
| chr8 | 47556418  | 47557097  | Acs1l         | ENSMUSG000000018796 | 304   | 0.06 | 0.11 | 0.12 | 0.14 | 0.06 | 0.11 |
| chr8 | 49195332  | 49195742  | Dctd          | ENSMUSG000000031562 | 170   | 0.23 | 0.21 | 0.09 | 0.14 | 0.16 | 0.14 |
| chr8 | 121868360 | 121868678 | Hsbp1         | ENSMUSG000000031839 | 81    | 0.05 | 0.25 | 0.07 | 0.11 | 0.07 | 0.08 |
| chr8 | 124806560 | 124806761 | Zfpm1         | ENSMUSG000000049577 | 619   | 0.25 | 0.18 | 0.12 | 0.24 | 0.27 | 0.08 |
| chr8 | 63461511  | 63462506  | Clcn3         | ENSMUSG000000004319 | 28    | 0.09 | 0.12 | 0.09 | 0.17 | 0.09 | 0.14 |
| chr8 | 73222577  | 73224305  | Jund          | ENSMUSG000000071076 | 584   | 0.08 | 0.13 | 0.11 | 0.12 | 0.09 | 0.14 |

|      |           |           |               |                    |       |      |      |      |      |      |      |
|------|-----------|-----------|---------------|--------------------|-------|------|------|------|------|------|------|
| chr8 | 74998607  | 74999425  | Cherp         | ENSMUSG00000052488 | 116   | 0.07 | 0.24 | 0.12 | 0.19 | 0.07 | 0.12 |
| chr8 | 113782274 | 113783281 | Glg1          | ENSMUSG00000003316 | 323   | 0.11 | 0.11 | 0.11 | 0.22 | 0.11 | 0.17 |
| chr8 | 3587582   | 3588213   | Camsap3       | ENSMUSG00000044433 | 447   | 0.15 | 0.14 | 0.11 | 0.22 | 0.14 | 0.1  |
| chr8 | 32278976  | 32279574  | Mak16         | ENSMUSG00000031578 | -79   | 0.08 | 0.13 | 0.12 | 0.21 | 0.07 | 0.13 |
| chr8 | 74012589  | 74013395  | Gtpbp3        | ENSMUSG00000007610 | 372   | 0.27 | 0.46 | 0.24 | 0.35 | 0.28 | 0.36 |
| chr8 | 24168704  | 24169357  | Ank1          | ENSMUSG00000031543 | 299   | 0.05 | 0.07 | 0.09 | 0.14 | 0.05 | 0.12 |
| chr8 | 66684215  | 66684653  | Tll1          | ENSMUSG00000053626 | 356   | 0.19 | 0.15 | 0.13 | 0.19 | 0.19 | 0.16 |
| chr8 | 87607141  | 87607412  | Man2b1        | ENSMUSG00000005142 | 108   | 0.05 | 0.07 | 0.16 | 0.07 | 0.07 | 0.15 |
| chr8 | 122386094 | 122386389 | Klhl36        | ENSMUSG00000031828 | 36    | 0.08 | 0.08 | 0.08 | 0.1  | 0.06 | 0.21 |
| chr8 | 3476035   | 3476340   | 1700019B03Rik | ENSMUSG00000040340 | 338   | 1    | 0.33 | NA   | NA   | 0.78 | 0.33 |
| chr8 | 4253002   | 4253419   | Snapc2        | ENSMUSG00000011837 | 108   | 0.2  | 0.33 | 0.09 | 0.12 | 0.22 | 0.17 |
| chr8 | 11478253  | 11478737  | Rab20         | ENSMUSG00000031504 | 143   | 0.17 | 0.09 | 0.1  | 0.16 | 0.17 | 0.13 |
| chr8 | 11634787  | 11636044  | Ankrd10       | ENSMUSG00000031508 | 339   | 0.12 | 0.1  | 0.11 | 0.17 | 0.12 | 0.14 |
| chr8 | 13287139  | 13288476  | Tmco3         | ENSMUSG00000038497 | -206  | 0.18 | 0.12 | 0.21 | 0.17 | 0.18 | 0.22 |
| chr8 | 14962535  | 14962751  | Gm16350       | ENSMUSG00000090024 | -1057 | 0.89 | 0.96 | 0.84 | 0.97 | 0.89 | 0.95 |
| chr8 | 23276620  | 23276885  | Nek3          | ENSMUSG00000031478 | 132   | 1    | 1    | NA   | 1    | 1    | NA   |
| chr8 | 24260198  | 24260705  | Gm15816       | ENSMUSG00000086741 | -394  | 0.13 | 0.25 | 0.08 | 0.17 | 0.12 | 0.14 |
| chr8 | 26148776  | 26149281  | Htra4         | ENSMUSG00000037406 | 406   | 0.05 | 0.07 | 0.07 | 0.08 | 0.05 | 0.1  |
| chr8 | 26707448  | 26708183  | D830025C05Rik | ENSMUSG00000043794 | 331   | 0.12 | 0.12 | 0.1  | 0.15 | 0.11 | 0.11 |
| chr8 | 27125621  | 27126066  | Fnta          | ENSMUSG00000015994 | 230   | 0.11 | 0.07 | 0.1  | 0.16 | 0.1  | 0.09 |
| chr8 | 27268365  | 27269386  | Thap1         | ENSMUSG00000037214 | 191   | 0.17 | 0.12 | 0.07 | 0.16 | 0.18 | 0.13 |
| chr8 | 28337783  | 28338715  | Adrb3         | ENSMUSG00000031489 | 717   | 0.08 | 0.11 | 0.15 | 0.16 | 0.08 | 0.12 |
| chr8 | 37520818  | 37521420  | 6430573F11Rik | ENSMUSG00000039620 | -92   | 0.06 | 0.06 | 0.13 | 0.12 | 0.06 | 0.08 |
| chr8 | 41984335  | 41984628  | Slc7a2        | ENSMUSG00000031596 | 689   | 1    | NA   | 0.62 | 1    | 1    | 0.87 |
| chr8 | 46036969  | 46037238  | Fat1          | ENSMUSG00000070047 | 1541  | 1    | 1    | 0.98 | 1    | 1    | 1    |
| chr8 | 48798499  | 48799906  | Cdkn2aip      | ENSMUSG00000038069 | 83    | 0.11 | 0.17 | 0.13 | 0.15 | 0.11 | 0.2  |
| chr8 | 63471935  | 63472386  | Nek1          | ENSMUSG00000031644 | 168   | 0.14 | 0.27 | 0.07 | 0.12 | 0.17 | 0.15 |
| chr8 | 63702571  | 63703438  | Sh3rf1        | ENSMUSG00000031642 | 335   | 0.09 | 0.18 | 0.09 | 0.13 | 0.09 | 0.17 |
| chr8 | 63966634  | 63966890  | Cbr4          | ENSMUSG00000031641 | 196   | 0.06 | 0.17 | 0.11 | 0.15 | 0.07 | 0.18 |
| chr8 | 69384022  | 69385081  | Naf1          | ENSMUSG00000014907 | 435   | 0.06 | 0.06 | 0.14 | 0.14 | 0.06 | 0.2  |

|      |           |           |               |                     |       |      |      |      |      |      |      |
|------|-----------|-----------|---------------|---------------------|-------|------|------|------|------|------|------|
| chr8 | 72839613  | 72839979  | Lass1         | ENSMUSG00000087408  | 110   | 0.1  | 0.06 | 0.05 | 0.11 | 0.09 | 0.07 |
| chr8 | 72897306  | 72897555  | Comp          | ENSMUSG00000031849  | -17   | 0.23 | 0.11 | 0.3  | 0.27 | 0.22 | 0.26 |
| chr8 | 73220488  | 73220714  | Jund          | ENSMUSG00000071076  | -1037 | 1    | NA   | 0.44 | 1    | 1    | 1    |
| chr8 | 73386880  | 73387139  | A230052G05Rik | ENSMUSG00000020887  | -17   | 0.1  | NA   | 0.15 | 0.19 | 0.14 | 0.21 |
| chr8 | 73989215  | 73989486  | Mrpl34        | ENSMUSG00000034880  | 525   | 0.33 | 0.29 | 0.17 | 0.17 | 0.27 | 0.15 |
| chr8 | 74009459  | 74009926  | Ano8          | ENSMUSG00000034863  | 274   | 0.1  | 0.17 | 0.15 | 0.21 | 0.1  | 0.24 |
| chr8 | 74115558  | 74116705  | Pgls          | ENSMUSG00000031807  | 56    | 0.15 | 0.12 | 0.12 | 0.25 | 0.15 | 0.19 |
| chr8 | 74213045  | 74213400  | Insl3         | ENSMUSG00000079019  | 109   | 1    | NA   | NA   | NA   | 1    | NA   |
| chr8 | 74249400  | 74249645  | Fcho1         | ENSMUSG00000070000  | 24    | 0.13 | 0.2  | 0.08 | 0.11 | 0.14 | 0.16 |
| chr8 | 74944743  | 74945715  | Eps15l1       | ENSMUSG00000006276  | 144   | 0.33 | 0.4  | 0.27 | 0.29 | 0.38 | 0.31 |
| chr8 | 75094632  | 75095227  | 9130011J15Rik | ENSMUSG00000044600  | 19    | 0.35 | 0.26 | 0.09 | 0.24 | 0.33 | 0.18 |
| chr8 | 83537863  | 83539220  | Usp38         | ENSMUSG00000038250  | 264   | 0.13 | 0.14 | 0.13 | 0.14 | 0.13 | 0.13 |
| chr8 | 85387339  | 85388469  | Rnf150        | ENSMUSG00000047747  | 190   | 0.07 | 0.09 | 0.09 | 0.15 | 0.07 | 0.12 |
| chr8 | 85689335  | 85690176  | Tbc1d9        | ENSMUSG00000031709  | -4    | 0.11 | 0.11 | 0.1  | 0.1  | 0.11 | 0.12 |
| chr8 | 85913631  | 85913951  | Clgn          | ENSMUSG00000002190  | 25    | 0.12 | 0.28 | 0.21 | 0.71 | 0.25 | 0.17 |
| chr8 | 86496240  | 86496953  | Prkaca        | ENSMUSG00000005469  | -281  | 0.12 | 0.25 | 0.09 | 0.15 | 0.11 | 0.15 |
| chr8 | 87364151  | 87364634  | Rad23a        | ENSMUSG00000003813  | 143   | 0.17 | 0.05 | 0.1  | 0.16 | 0.18 | 0.17 |
| chr8 | 87493308  | 87493658  | Rnaseh2a      | ENSMUSG000000052926 | -144  | 0.12 | 0.2  | 0.12 | 0.21 | 0.12 | 0.22 |
| chr8 | 87514446  | 87514698  | Hook2         | ENSMUSG000000052566 | 78    | 0.8  | NA   | 0.75 | NA   | 1    | NA   |
| chr8 | 88364437  | 88364868  | Itfg1         | ENSMUSG000000031703 | 196   | 0.13 | 0.15 | 0.07 | 0.09 | 0.14 | 0.15 |
| chr8 | 89147983  | 89148478  | Lonp2         | ENSMUSG000000047866 | 244   | 0.16 | 0.15 | 0.13 | 0.2  | 0.16 | 0.13 |
| chr8 | 90642604  | 90642968  | Tmem188       | ENSMUSG000000036810 | 118   | 0.05 | 0.06 | 0.11 | 0.18 | 0.07 | 0.1  |
| chr8 | 97399847  | 97400196  | Dok4          | ENSMUSG000000040631 | 191   | 0.07 | 0.2  | 0.18 | 0.14 | 0.08 | 0.14 |
| chr8 | 106774750 | 106775158 | Cklf          | ENSMUSG000000054400 | 151   | 0.1  | 0.11 | 0.16 | 0.2  | 0.09 | 0.1  |
| chr8 | 107800217 | 107800437 | Nol3          | ENSMUSG000000014776 | -20   | 0.71 | 0.29 | 0.27 | 0.3  | 0.75 | 0.24 |
| chr8 | 107813280 | 107814488 | 4931428F04Rik | ENSMUSG000000014837 | -456  | 0.33 | 0.14 | 0.21 | 0.4  | 0.33 | 0.21 |
| chr8 | 108224606 | 108225689 | Acd           | ENSMUSG000000038000 | -163  | 0.14 | 0.1  | 0.12 | 0.2  | 0.13 | 0.16 |
| chr8 | 108378680 | 108379855 | Thap11        | ENSMUSG000000036442 | 264   | 0.09 | 0.11 | 0.11 | 0.18 | 0.09 | 0.13 |
| chr8 | 109206902 | 109207406 | Tmco7         | ENSMUSG000000041949 | 186   | 0.5  | 0.19 | 0.11 | 0.2  | 0.5  | 0.14 |
| chr8 | 109561901 | 109562104 | Gm16209       | ENSMUSG000000083734 | 4     | 1    | 1    | NA   | NA   | 1    | NA   |

|      |           |           |          |                     |       |      |      |      |      |      |      |
|------|-----------|-----------|----------|---------------------|-------|------|------|------|------|------|------|
| chr8 | 111238367 | 111239279 | Zfx3     | ENSMUSG00000038872  | 279   | 0.13 | 0.11 | 0.07 | 0.1  | 0.13 | 0.14 |
| chr8 | 112132358 | 112132686 | Dhodh    | ENSMUSG00000031730  | 1     | 0.08 | 0.08 | 0.1  | 0.15 | 0.08 | 0.12 |
| chr8 | 112603597 | 112604028 | Zfp612   | ENSMUSG00000044676  | 148   | 0.07 | 0.12 | 0.11 | 0.14 | 0.08 | 0.17 |
| chr8 | 113245193 | 113245432 | Mtss1l   | ENSMUSG00000033763  | -64   | 0.1  | 0.17 | 0.07 | 0.15 | 0.1  | 0.19 |
| chr8 | 113370896 | 113371191 | Cog4     | ENSMUSG00000031753  | 119   | 0.41 | 0.41 | 0.16 | 0.1  | 0.38 | 0.26 |
| chr8 | 116729438 | 116729895 | Vat1l    | ENSMUSG00000046844  | 154   | 0.1  | 0.06 | 0.07 | 0.18 | 0.09 | 0.14 |
| chr8 | 122136463 | 122136747 | Adad2    | ENSMUSG00000024266  | -42   | 0.96 | 0.96 | 0.79 | 0.69 | 0.97 | 0.97 |
| chr8 | 123631915 | 123632487 | Mthfsd   | ENSMUSG00000031816  | -13   | 0.25 | 0.48 | 0.18 | 0.21 | 0.3  | 0.36 |
| chr8 | 124805648 | 124806140 | Zfpm1    | ENSMUSG00000049577  | -147  | 0.08 | 0.08 | 0.08 | 0.16 | 0.07 | 0.13 |
| chr8 | 125897376 | 125898333 | Tcf25    | ENSMUSG00000001472  | 130   | 0.08 | 0.1  | 0.09 | 0.18 | 0.07 | 0.16 |
| chr8 | 130880884 | 130881447 | Nrp1     | ENSMUSG00000025810  | -1808 | 0.1  | 0.6  | 0.1  | 0.28 | 0.07 | 0.15 |
| chr8 | 130882347 | 130882587 | Nrp1     | ENSMUSG00000025810  | -506  | 0.11 | 0.05 | 0.16 | 0.19 | 0.11 | 0.07 |
| chr8 | 3515318   | 3515566   | Pnpla6   | ENSMUSG00000004565  | 58    | NA   | 0.1  | 0.1  | 0.5  | 1    | 0.11 |
| chr8 | 3630823   | 3631224   | Stxbp2   | ENSMUSG00000004626  | 68    | 0.2  | 0.18 | 0.13 | 0.16 | NA   | 0.21 |
| chr8 | 4217071   | 4217359   | BC068157 | ENSMUSG000000064125 | -63   | NA   | NA   | 0.5  | NA   | NA   | NA   |
| chr8 | 4493286   | 4493562   | Lass4    | ENSMUSG00000008206  | -29   | NA   | NA   | 0.28 | 0.28 | NA   | 0.21 |
| chr8 | 11636466  | 11636671  | Ankrd10  | ENSMUSG00000031508  | -814  | 0.09 | 0.12 | 0.11 | 0.2  | NA   | 0.13 |
| chr8 | 12915717  | 12915971  | Gm15351  | ENSMUSG000000086770 | -86   | NA   | 1    | 0.16 | 0.5  | 0.25 | NA   |
| chr8 | 14888714  | 14889037  | Cln8     | ENSMUSG00000026317  | -129  | NA   | 0.18 | 0.11 | 0.19 | 0.33 | 0.05 |
| chr8 | 14911444  | 14911810  | Arhgef10 | ENSMUSG00000071176  | -36   | NA   | NA   | 0.35 | 0.17 | NA   | 0.15 |
| chr8 | 23170593  | 23171358  | Atp7b    | ENSMUSG00000006567  | -198  | 1    | 0.56 | 0.22 | 0.21 | NA   | 0.28 |
| chr8 | 23337705  | 23337969  | Thsd1    | ENSMUSG00000031480  | 52    | 1    | NA   | 1    | NA   | NA   | 1    |
| chr8 | 28238854  | 28239222  | Brf2     | ENSMUSG00000031487  | 66    | NA   | 0.17 | 0.11 | 0.1  | 0.18 | 0.12 |
| chr8 | 32261307  | 32261508  | Tti2     | ENSMUSG00000031577  | 619   | 0.5  | NA   | 0.17 | 0.17 | NA   | 0.15 |
| chr8 | 35171216  | 35171644  | Dctn6    | ENSMUSG00000031516  | 87    | NA   | 1    | NA   | 1    | 0.56 | NA   |
| chr8 | 46035919  | 46036180  | Fat1     | ENSMUSG00000070047  | 487   | NA   | 1    | 1    | 1    | 1    | 1    |
| chr8 | 58773327  | 58773591  | Hpgd     | ENSMUSG00000031613  | 110   | NA   | 0.12 | 0.07 | 0.37 | 1    | 0.1  |
| chr8 | 71404546  | 71404753  | Lpl      | ENSMUSG00000015568  | 93    | 0.5  | 0.5  | 0.11 | 0.33 | NA   | 0.26 |
| chr8 | 72149073  | 72149462  | Zfp868   | ENSMUSG00000060427  | 177   | 0.14 | NA   | 0.32 | 0.14 | NA   | 0.2  |
| chr8 | 72298510  | 72298854  | Gm20422  | ENSMUSG00000092544  | 103   | NA   | NA   | NA   | 1    | NA   | 1    |

|      |           |           |               |                    |       |      |      |      |      |      |      |
|------|-----------|-----------|---------------|--------------------|-------|------|------|------|------|------|------|
| chr8 | 72356438  | 72356787  | Pbx4          | ENSMUSG00000031860 | 89    | NA   | NA   | 0.15 | 0.5  | 0.11 | 0.15 |
| chr8 | 72663115  | 72663801  | 2310045N01Rik | ENSMUSG00000002345 | 60    | NA   | 1    | 0.27 | 0.83 | 0.25 | 0.25 |
| chr8 | 73253991  | 73254198  | Pde4c         | ENSMUSG00000031842 | 83    | 1    | 0.33 | 0.11 | 0.19 | NA   | 0.16 |
| chr8 | 73267036  | 73267495  | Pde4c         | ENSMUSG00000031842 | 287   | NA   | NA   | NA   | 1    | NA   | NA   |
| chr8 | 73284557  | 73285149  | Mpv17l2       | ENSMUSG00000035559 | -33   | NA   | NA   | 1    | NA   | NA   | 0.5  |
| chr8 | 73293396  | 73293649  | Pik3r2        | ENSMUSG00000031834 | 41    | NA   | NA   | NA   | NA   | NA   | 0.67 |
| chr8 | 73380656  | 73380919  | Kcnn1         | ENSMUSG00000002908 | 120   | NA   | 1    | 0.1  | 0.5  | 1    | 0.32 |
| chr8 | 73421001  | 73421570  | Rpl18a        | ENSMUSG00000045128 | 57    | NA   | 0.25 | 0.09 | 0.23 | NA   | 0.13 |
| chr8 | 74119808  | 74120147  | Fam129c       | ENSMUSG00000043243 | -1570 | NA   | NA   | 0.16 | 0.25 | NA   | 0.21 |
| chr8 | 74200383  | 74200590  | Jak3          | ENSMUSG00000031805 | 43    | 1    | NA   | NA   | NA   | NA   | NA   |
| chr8 | 74233481  | 74233720  | Fcho1         | ENSMUSG00000070000 | 1405  | 0.8  | 0.5  | 0.5  | NA   | NA   | 0.38 |
| chr8 | 74432570  | 74432777  | Zfp882        | ENSMUSG00000089857 | 117   | 0.33 | NA   | 0.11 | NA   | NA   | 0.23 |
| chr8 | 74474898  | 74475194  | Zfp961        | ENSMUSG00000052446 | 109   | NA   | NA   | 0.09 | NA   | NA   | 0.22 |
| chr8 | 79425836  | 79426169  | Nr3c2         | ENSMUSG00000031618 | -185  | NA   | NA   | 0.11 | 0.12 | NA   | 0.12 |
| chr8 | 80134187  | 80134420  | Tmem184c      | ENSMUSG00000031617 | -179  | NA   | NA   | 0.22 | NA   | NA   | 0.17 |
| chr8 | 83135166  | 83135425  | Frem3         | ENSMUSG00000042353 | 316   | 0.18 | 0.1  | 0.12 | 0.17 | NA   | 0.24 |
| chr8 | 85297845  | 85298135  | Zfp330        | ENSMUSG00000031711 | 69    | NA   | 0.33 | 0.17 | 0.12 | 0.67 | 0.2  |
| chr8 | 86118297  | 86118650  | Tecr          | ENSMUSG00000031708 | -145  | NA   | 0.3  | 0.07 | 0.29 | 0.26 | 0.16 |
| chr8 | 86549868  | 86550166  | Palm3         | ENSMUSG00000047986 | 43    | NA   | NA   | 0.29 | NA   | NA   | 0.19 |
| chr8 | 87324362  | 87324584  | Nfix          | ENSMUSG00000001911 | -230  | NA   | 0.41 | 0.1  | 0.11 | 0.04 | 0.09 |
| chr8 | 87370424  | 87371288  | Calr          | ENSMUSG00000003814 | -131  | NA   | NA   | NA   | NA   | NA   | 0.2  |
| chr8 | 87380797  | 87381122  | Farsa         | ENSMUSG00000003808 | 71    | NA   | NA   | NA   | NA   | NA   | 0.5  |
| chr8 | 96561147  | 96561428  | Ogfod1        | ENSMUSG00000033009 | 127   | NA   | 0.21 | 0.07 | 0.21 | 0.14 | 0.13 |
| chr8 | 97295927  | 97296206  | Cx3cl1        | ENSMUSG00000031778 | -38   | NA   | NA   | 0.17 | NA   | 0.2  | 0.15 |
| chr8 | 98412000  | 98412414  | Got2          | ENSMUSG00000031672 | 240   | NA   | NA   | NA   | NA   | NA   | 1    |
| chr8 | 105308211 | 105308448 | Cdh11         | ENSMUSG00000031673 | 682   | NA   | NA   | 0.17 | 0.38 | NA   | 0.23 |
| chr8 | 107115397 | 107115734 | Pdp2          | ENSMUSG00000048371 | 197   | NA   | 0.53 | 0.15 | 0.17 | NA   | 0.14 |
| chr8 | 107778103 | 107778635 | B3gnt9-ps     | ENSMUSG00000069920 | 682   | NA   | 0.17 | 0.07 | 0.16 | NA   | 0.15 |
| chr8 | 107995264 | 107995506 | Tppp3         | ENSMUSG00000014846 | 41    | NA   | 0.5  | 0.24 | 0.12 | 1    | 0.23 |
| chr8 | 108137832 | 108138432 | Mir1966       | ENSMUSG00000089432 | -1234 | 0.5  | 0.46 | 0.15 | 0.5  | NA   | 0.38 |

|      |           |           |               |                    |      |      |      |      |      |      |      |
|------|-----------|-----------|---------------|--------------------|------|------|------|------|------|------|------|
| chr8 | 108375752 | 108375964 | Cenpt         | ENSMUSG00000036672 | 50   | NA   | 1    | NA   | NA   | NA   | NA   |
| chr8 | 109035282 | 109035598 | Cdh3          | ENSMUSG00000061048 | 627  | NA   | NA   | 0.15 | NA   | NA   | NA   |
| chr8 | 113370315 | 113370704 | Cog4          | ENSMUSG00000031753 | 9    | NA   | NA   | 0.25 | NA   | NA   | 0.25 |
| chr8 | 116372088 | 116372754 | Adamts18      | ENSMUSG00000053399 | 94   | 0.5  | 0.5  | 0.16 | 0.04 | NA   | 0.14 |
| chr8 | 120325606 | 120326185 | Mphosph6      | ENSMUSG00000031843 | -66  | NA   | 0.14 | 0.13 | 0.11 | 0.17 | 0.18 |
| chr8 | 121971547 | 121971794 | Necab2        | ENSMUSG00000031837 | 1009 | 1    | NA   | 0.12 | 1    | NA   | NA   |
| chr8 | 122480504 | 122480960 | Usp10         | ENSMUSG00000031826 | 626  | NA   | NA   | 0.75 | 1    | 1    | 1    |
| chr8 | 125748670 | 125749120 | Cdk10         | ENSMUSG00000033862 | 154  | 0.4  | 0.5  | 0.14 | 1    | NA   | 0.18 |
| chr8 | 125759491 | 125759700 | Spata2l       | ENSMUSG00000033594 | 511  | NA   | NA   | 0.17 | NA   | NA   | NA   |
| chr8 | 126069601 | 126069854 | n-R5s104      | ENSMUSG00000075735 | -131 | NA   | NA   | 1    | NA   | NA   | NA   |
| chr8 | 127577930 | 127578684 | Disc1         | ENSMUSG00000043051 | 212  | NA   | 1    | 1    | NA   | NA   | NA   |
| chr9 | 44575298  | 44575969  | Arcn1         | ENSMUSG00000032096 | 248  | 0.32 | 0.29 | 0.15 | 0.16 | 0.1  | 0.17 |
| chr9 | 56482834  | 56483927  | Lingo1        | ENSMUSG00000049556 | 55   | 0.28 | 0.22 | 0.11 | 0.13 | 0.09 | 0.14 |
| chr9 | 67678593  | 67679551  | C2cd4a        | ENSMUSG00000047990 | 1065 | 0.24 | 0.08 | 0.1  | 0.1  | 0.07 | 0.11 |
| chr9 | 108393012 | 108393651 | Usp19         | ENSMUSG00000006676 | 311  | 0.3  | 0.1  | 0.08 | 0.16 | 0.1  | 0.16 |
| chr9 | 54434087  | 54434773  | Idh3a         | ENSMUSG00000032279 | 142  | 0.41 | 0.18 | 0.08 | 0.14 | 0.12 | 0.15 |
| chr9 | 91276269  | 91276948  | Zic4          | ENSMUSG00000036972 | -640 | 0.5  | 0.16 | 0.08 | 0.11 | 0.11 | 0.14 |
| chr9 | 42280102  | 42280437  | Tbcel         | ENSMUSG00000037287 | 32   | 0.55 | 0.22 | 0.14 | 0.29 | 0.16 | 0.14 |
| chr9 | 64188279  | 64189133  | Dis3l         | ENSMUSG00000032396 | -136 | 0.41 | 0.17 | 0.14 | 0.16 | 0.14 | 0.18 |
| chr9 | 108499373 | 108500091 | P4htm         | ENSMUSG00000006675 | 199  | 0.35 | 0.21 | 0.16 | 0.16 | 0.12 | 0.18 |
| chr9 | 119803865 | 119804651 | Gm2449        | ENSMUSG00000084857 | -277 | 0.27 | 0.11 | 0.15 | 0.19 | 0.1  | 0.16 |
| chr9 | 98742823  | 98743204  | Prr23a        | ENSMUSG00000091080 | 7    | 0.8  | 0.88 | 0.59 | 0.38 | 0.32 | 0.47 |
| chr9 | 30938871  | 30939498  | St14          | ENSMUSG00000031995 | 197  | 0.4  | 0.16 | 0.1  | 0.15 | 0.11 | 0.14 |
| chr9 | 58670037  | 58671973  | Hcn4          | ENSMUSG00000032338 | -314 | 0.17 | 0.18 | 0.09 | 0.14 | 0.09 | 0.14 |
| chr9 | 98765282  | 98765633  | 2410012M07Rik | ENSMUSG00000090470 | 271  | 0.9  | 0.47 | 0.21 | 0.69 | 0.4  | 0.3  |
| chr9 | 122930228 | 122930710 | Tmem42        | ENSMUSG00000066233 | 25   | 0.38 | 0.11 | 0.07 | 0.12 | 0.07 | 0.11 |
| chr9 | 108092361 | 108092913 | Bsn           | ENSMUSG00000032589 | 78   | 0.07 | 0.18 | 0.11 | 0.15 | 0.45 | 0.16 |
| chr9 | 110207454 | 110208002 | 2610002l17Rik | ENSMUSG00000054836 | 32   | 1    | 0.25 | 0.15 | 0.25 | 0.05 | 0.37 |
| chr9 | 123124807 | 123125195 | Cdcp1         | ENSMUSG00000035498 | 116  | 0.42 | 0.25 | 0.14 | 0.17 | 0.14 | 0.2  |
| chr9 | 108166259 | 108166259 | Dag1          | ENSMUSG00000039952 | 134  | 0.21 | 0.08 | 0.05 | 0.11 | 0.08 | 0.08 |

|      |           |           |               |                     |       |      |      |      |      |      |      |
|------|-----------|-----------|---------------|---------------------|-------|------|------|------|------|------|------|
| chr9 | 59527911  | 59528544  | Gramd2        | ENSMUSG00000074259  | 276   | 0.25 | 0.13 | 0.18 | 0.12 | 0.09 | 0.17 |
| chr9 | 45820607  | 45821521  | Sik3          | ENSMUSG00000034135  | 161   | 0.31 | 0.25 | 0.12 | 0.19 | 0.14 | 0.13 |
| chr9 | 45636470  | 45636736  | Cep164        | ENSMUSG00000043987  | 118   | 0.27 | 0.33 | 0.2  | 0.19 | 1    | 0.22 |
| chr9 | 86465174  | 86466017  | Pgm3          | ENSMUSG00000056131  | -146  | 1    | 0.13 | 0.11 | 0.15 | 0.09 | 0.19 |
| chr9 | 54996727  | 54997943  | Ube2q2        | ENSMUSG00000032307  | 133   | 0.24 | 0.18 | 0.07 | 0.14 | 0.12 | 0.11 |
| chr9 | 123168725 | 123170083 | Tmem158       | ENSMUSG00000054871  | 503   | 0.37 | 0.18 | 0.1  | 0.2  | 0.14 | 0.15 |
| chr9 | 108976279 | 108976837 | Atrip         | ENSMUSG00000025646  | 8     | 0.37 | 0.29 | 0.11 | 0.16 | 0.12 | 0.16 |
| chr9 | 108480629 | 108481203 | Wdr6          | ENSMUSG00000066357  | 85    | 1    | 0.25 | 0.1  | 0.2  | 0.08 | 0.24 |
| chr9 | 44187236  | 44187967  | Hyou1         | ENSMUSG00000032115  | 28    | 0.21 | 0.16 | 0.08 | 0.14 | 0.08 | 0.15 |
| chr9 | 119002395 | 119002893 | Plcd1         | ENSMUSG00000010660  | -30   | 0.37 | 0.25 | 0.14 | 0.15 | 0.15 | 0.14 |
| chr9 | 86360662  | 86361258  | Dopey1        | ENSMUSG00000034973  | 199   | 0.23 | 0.22 | 0.09 | 0.09 | 0.1  | 0.13 |
| chr9 | 51086669  | 51087388  | 2010007H06Rik | ENSMUSG00000044694  | -1372 | 0.75 | 0.16 | 0.17 | 0.22 | 0.06 | 0.19 |
| chr9 | 122203072 | 122203710 | Ano10         | ENSMUSG00000037949  | 101   | 0.39 | 0.2  | 0.08 | 0.12 | 0.12 | 0.09 |
| chr9 | 57612246  | 57614004  | Clk3          | ENSMUSG00000032316  | 542   | 0.27 | 0.23 | 0.11 | 0.15 | 0.12 | 0.18 |
| chr9 | 14849442  | 14849986  | Panx1         | ENSMUSG00000031934  | 208   | 0.1  | 0.2  | 0.09 | 0.18 | 0.23 | 0.13 |
| chr9 | 69988860  | 69989534  | Fam81a        | ENSMUSG00000032224  | 188   | 0.28 | 0.11 | 0.08 | 0.14 | 0.1  | 0.15 |
| chr9 | 106101304 | 106101670 | Ppm1m         | ENSMUSG00000020253  | 77    | 0.21 | 0.45 | 0.56 | 0.78 | 1    | 0.2  |
| chr9 | 25289070  | 25289549  | Eepd1         | ENSMUSG00000036611  | 177   | 0.2  | 0.07 | 0.11 | 0.13 | 0.04 | 0.16 |
| chr9 | 95537977  | 95538501  | Pcolce2       | ENSMUSG00000015354  | 219   | 0.28 | 0.24 | 0.13 | 0.1  | 0.08 | 0.1  |
| chr9 | 45792557  | 45793057  | Pafah1b2      | ENSMUSG00000003131  | 60    | 0.05 | 0.27 | 0.07 | 0.14 | 0.16 | 0.12 |
| chr9 | 95411708  | 95412724  | 2610101N10Rik | ENSMUSG00000032407  | 199   | 0.38 | 0.26 | 0.12 | 0.17 | 0.1  | 0.16 |
| chr9 | 58335732  | 58336910  | 6030419C18Rik | ENSMUSG000000091354 | -449  | 0.09 | 0.13 | 0.11 | 0.13 | 0.16 | 0.1  |
| chr9 | 107436212 | 107436894 | Tmem115       | ENSMUSG00000010045  | 277   | 0.27 | 0.13 | 0.09 | 0.13 | 0.13 | 0.11 |
| chr9 | 97933139  | 97934007  | Clstn2        | ENSMUSG00000032452  | -171  | 0.22 | 0.16 | 0.12 | 0.11 | 0.12 | 0.14 |
| chr9 | 70269167  | 70269404  | Ccnb2         | ENSMUSG00000032218  | 76    | 0.38 | 0.27 | 0.12 | 0.13 | 0.11 | 0.12 |
| chr9 | 121206785 | 121207207 | Trak1         | ENSMUSG00000032536  | 376   | 0.09 | 0.1  | 0.15 | 0.2  | 0.21 | 0.13 |
| chr9 | 53822562  | 53823161  | Elmod1        | ENSMUSG00000041986  | 247   | 0.5  | 0.2  | 0.1  | 0.12 | 0.06 | 0.2  |
| chr9 | 66895897  | 66897451  | Tpm1          | ENSMUSG00000032366  | 251   | 0.23 | 0.14 | 0.1  | 0.16 | 0.1  | 0.11 |
| chr9 | 53619418  | 53619930  | Slc35f2       | ENSMUSG00000042195  | 332   | 0.36 | 0.16 | 0.11 | 0.23 | 0.15 | 0.3  |
| chr9 | 60642200  | 60642794  | Uaca          | ENSMUSG00000034485  | 142   | 0.28 | 0.09 | 0.15 | 0.14 | 0.14 | 0.14 |



|      |           |           |               |                    |      |      |      |      |      |      |      |
|------|-----------|-----------|---------------|--------------------|------|------|------|------|------|------|------|
| chr9 | 62188573  | 62192506  | Anp32a        | ENSMUSG00000032249 | 1439 | 0.29 | 0.34 | 0.12 | 0.2  | 0.16 | 0.18 |
| chr9 | 8003468   | 8004940   | Yap1          | ENSMUSG00000053110 | -447 | 0.19 | 0.11 | 0.1  | 0.17 | 0.1  | 0.17 |
| chr9 | 100977786 | 100978765 | Msl2          | ENSMUSG00000066415 | -176 | 0.17 | 0.24 | 0.1  | 0.19 | 0.07 | 0.15 |
| chr9 | 20969487  | 20970784  | Pde4a         | ENSMUSG00000032177 | -23  | 0.15 | 0.24 | 0.11 | 0.16 | 0.25 | 0.18 |
| chr9 | 106691228 | 106691600 | Rad54l2       | ENSMUSG00000040661 | 130  | 0.21 | 0.14 | 0.09 | 0.12 | 0.08 | 0.11 |
| chr9 | 70526511  | 70527593  | Adam10        | ENSMUSG00000054693 | 248  | 0.22 | 0.16 | 0.1  | 0.13 | 0.11 | 0.13 |
| chr9 | 72339560  | 72339842  | Tex9          | ENSMUSG00000090626 | 207  | 0.31 | 0.17 | 0.14 | 0.3  | 0.09 | 0.26 |
| chr9 | 20986002  | 20986351  | Pde4a         | ENSMUSG00000032177 | 116  | 0.34 | 0.32 | 0.29 | 0.32 | 0.21 | 0.26 |
| chr9 | 37155872  | 37156207  | Ccdc15        | ENSMUSG00000034303 | -62  | 0.5  | 0.09 | 0.08 | 0.19 | 0.09 | 0.14 |
| chr9 | 96619923  | 96620483  | Zbtb38        | ENSMUSG00000040433 | -219 | 0.21 | 0.26 | 0.08 | 0.18 | 0.1  | 0.17 |
| chr9 | 117781286 | 117782195 | Gm16977       | ENSMUSG00000085506 | -522 | 0.34 | 0.13 | 0.14 | 0.15 | 0.14 | 0.18 |
| chr9 | 44412162  | 44413510  | Ddx6          | ENSMUSG00000032097 | -139 | 0.32 | 0.2  | 0.14 | 0.16 | 0.13 | 0.18 |
| chr9 | 62658824  | 62659837  | Fem1b         | ENSMUSG00000032244 | 125  | 0.17 | 0.18 | 0.09 | 0.12 | 0.07 | 0.15 |
| chr9 | 21854858  | 21856611  | Elavl3        | ENSMUSG00000003410 | 733  | 0.17 | 0.1  | 0.11 | 0.15 | 0.08 | 0.11 |
| chr9 | 21116613  | 21116973  | Ap1m2         | ENSMUSG00000003309 | -16  | 0.78 | NA   | 0.65 | 0.7  | 0.33 | 0.27 |
| chr9 | 78290324  | 78291075  | E330016A19Rik | ENSMUSG00000032344 | -7   | 0.5  | 0.2  | 0.14 | 0.18 | 0.17 | 0.2  |
| chr9 | 86774337  | 86775696  | Snap91        | ENSMUSG00000033419 | 233  | 0.16 | 0.14 | 0.12 | 0.16 | 0.1  | 0.13 |
| chr9 | 114640230 | 114640660 | Cmtm6         | ENSMUSG00000032434 | 124  | 0.31 | 0.15 | 0.13 | 0.29 | 0.12 | 0.17 |
| chr9 | 44113368  | 44114060  | Hinfp         | ENSMUSG00000032119 | 40   | 0.36 | 0.19 | 0.1  | 0.15 | 0.14 | 0.11 |
| chr9 | 18096419  | 18097058  | Chordc1       | ENSMUSG00000001774 | 27   | 0.25 | 0.21 | 0.14 | 0.23 | 0.11 | 0.14 |
| chr9 | 62996476  | 62997219  | Skor1         | ENSMUSG00000022245 | -79  | 0.21 | 0.07 | 0.07 | 0.18 | 0.09 | 0.11 |
| chr9 | 110434404 | 110435813 | Setd2         | ENSMUSG00000044791 | 7    | 0.22 | 0.14 | 0.11 | 0.17 | 0.12 | 0.13 |
| chr9 | 56923988  | 56924936  | Sin3a         | ENSMUSG00000042557 | 279  | 0.2  | 0.22 | 0.12 | 0.17 | 0.08 | 0.12 |
| chr9 | 108462649 | 108463105 | Impdh2        | ENSMUSG00000062867 | 103  | 1    | 0.2  | 0.1  | 0.18 | 0.19 | 0.13 |
| chr9 | 65238495  | 65239418  | Kbtbd13       | ENSMUSG00000054978 | 503  | 0.91 | 0.55 | 0.37 | 0.32 | 0.74 | 0.48 |
| chr9 | 37464607  | 37464921  | Tbrg1         | ENSMUSG00000011114 | -21  | 0.27 | 0.06 | 0.11 | 0.17 | 0.08 | 0.26 |
| chr9 | 21314369  | 21314730  | Tmed1         | ENSMUSG00000032180 | 81   | 1    | 0.14 | 0.09 | 0.2  | 0.04 | 0.15 |
| chr9 | 15083976  | 15084483  | Med17         | ENSMUSG00000031935 | 82   | 0.22 | 0.14 | 0.12 | 0.2  | 0.06 | 0.19 |
| chr9 | 122026301 | 122027011 | Snrk          | ENSMUSG00000038145 | 255  | 0.23 | 0.14 | 0.07 | 0.14 | 0.11 | 0.09 |
| chr9 | 66197803  | 66198856  | Herc1         | ENSMUSG00000038664 | 72   | 0.31 | 0.18 | 0.11 | 0.16 | 0.15 | 0.18 |

|      |           |           |               |                    |      |      |      |      |      |      |      |
|------|-----------|-----------|---------------|--------------------|------|------|------|------|------|------|------|
| chr9 | 20189369  | 20189875  | Zfp560        | ENSMUSG00000045519 | -1   | 0.3  | 0.15 | 0.08 | 0.17 | 0.08 | 0.17 |
| chr9 | 106105337 | 106105666 | Twf2          | ENSMUSG00000023277 | 62   | 0.24 | 0.14 | 0.08 | 0.11 | 0.1  | 0.12 |
| chr9 | 120480498 | 120480915 | Rpl14         | ENSMUSG00000025794 | 74   | 0.3  | 0.11 | 0.14 | 0.2  | 0.12 | 0.16 |
| chr9 | 113935741 | 113935971 | Fbxl2         | ENSMUSG00000032507 | -12  | 0.05 | 0.15 | 0.06 | 0.12 | 0.11 | 0.16 |
| chr9 | 102737038 | 102737876 | Ryk           | ENSMUSG00000032547 | 210  | 0.32 | 0.25 | 0.08 | 0.14 | 0.21 | 0.13 |
| chr9 | 24307449  | 24308042  | Dpy19l1       | ENSMUSG00000043067 | -161 | 0.12 | 0.1  | 0.08 | 0.12 | 0.06 | 0.14 |
| chr9 | 42913509  | 42914632  | Arhgef12      | ENSMUSG00000059495 | -501 | 0.17 | 0.17 | 0.1  | 0.17 | 0.11 | 0.15 |
| chr9 | 86358149  | 86358607  | Ube2cbp       | ENSMUSG00000032415 | 156  | 0.13 | 0.11 | 0.07 | 0.11 | 0.05 | 0.14 |
| chr9 | 44607093  | 44607887  | Tmem25        | ENSMUSG0000002032  | -209 | 0.22 | 0.17 | 0.08 | 0.2  | 0.1  | 0.11 |
| chr9 | 74800482  | 74801142  | BC031353      | ENSMUSG00000034858 | 121  | 0.13 | 0.18 | 0.11 | 0.16 | 0.06 | 0.1  |
| chr9 | 105545216 | 105545660 | Pik3r4        | ENSMUSG00000032571 | 113  | 0.23 | 0.31 | 0.15 | 0.14 | 0.59 | 0.14 |
| chr9 | 44127648  | 44128436  | C2cd2l        | ENSMUSG00000032120 | -168 | 0.25 | 0.19 | 0.12 | 0.2  | 0.15 | 0.17 |
| chr9 | 100934963 | 100935379 | Pccb          | ENSMUSG00000032527 | 98   | 0.3  | 0.11 | 0.13 | 0.08 | 0.08 | 0.18 |
| chr9 | 88376104  | 88378037  | Syncrip       | ENSMUSG00000032423 | -101 | 0.2  | 0.14 | 0.1  | 0.15 | 0.11 | 0.15 |
| chr9 | 110645226 | 110646574 | Pth1r         | ENSMUSG00000032492 | 290  | 0.26 | 0.28 | 0.14 | 0.25 | 0.09 | 0.21 |
| chr9 | 29219335  | 29220341  | Ntm           | ENSMUSG00000059974 | -49  | 0.28 | 0.32 | 0.15 | 0.23 | 0.14 | 0.16 |
| chr9 | 105546898 | 105547261 | Pik3r4        | ENSMUSG00000032571 | 1754 | 0.92 | 0.99 | 0.86 | 0.89 | 0.99 | 0.98 |
| chr9 | 21656814  | 21657208  | Dock6         | ENSMUSG00000032198 | 68   | 0.38 | 0.15 | 0.06 | 0.22 | 0.1  | 0.16 |
| chr9 | 50576102  | 50576663  | 1110032A03Rik | ENSMUSG00000037971 | -179 | 0.23 | 0.16 | 0.1  | 0.16 | 0.1  | 0.16 |
| chr9 | 54612461  | 54612833  | Crabp1        | ENSMUSG00000032291 | 92   | 0.13 | 0.23 | 0.13 | 0.16 | 0.27 | 0.16 |
| chr9 | 21961136  | 21961680  | Pigyl         | ENSMUSG00000010607 | 118  | 0.56 | 0.44 | 0.1  | 0.18 | 0.16 | 0.17 |
| chr9 | 104955557 | 104955805 | Mrpl3         | ENSMUSG00000032563 | 112  | 0.16 | 0.14 | 0.13 | 0.4  | 0.04 | 0.1  |
| chr9 | 57368869  | 57369620  | Cox5a         | ENSMUSG00000000088 | 205  | 0.14 | 0.12 | 0.09 | 0.11 | 0.07 | 0.14 |
| chr9 | 58429856  | 58430659  | Nptn          | ENSMUSG00000032336 | 210  | 0.2  | 0.12 | 0.11 | 0.19 | 0.11 | 0.16 |
| chr9 | 35007355  | 35007685  | Tirap         | ENSMUSG00000032041 | -61  | 0.8  | 0.12 | 0.15 | 0.26 | 0.17 | 0.23 |
| chr9 | 43551761  | 43552790  | Pvrl1         | ENSMUSG00000032012 | -384 | 0.23 | 0.13 | 0.11 | 0.15 | 0.12 | 0.16 |
| chr9 | 50411888  | 50412407  | Sdhd          | ENSMUSG00000000171 | -193 | 0.29 | 0.35 | 0.11 | 0.15 | 0.18 | 0.22 |
| chr9 | 78295893  | 78296628  | Mto1          | ENSMUSG00000032342 | 245  | 1    | 1    | 0.09 | NA   | 0.09 | 0.12 |
| chr9 | 94437507  | 94439489  | 1190002N15Rik | ENSMUSG00000045414 | 2    | 0.17 | 0.16 | 0.08 | 0.14 | 0.11 | 0.11 |
| chr9 | 104164613 | 104165518 | Dnajc13       | ENSMUSG00000032560 | 195  | 0.15 | 0.1  | 0.12 | 0.19 | 0.08 | 0.14 |

|      |           |           |               |                    |      |      |      |      |      |      |      |
|------|-----------|-----------|---------------|--------------------|------|------|------|------|------|------|------|
| chr9 | 87624320  | 87625884  | Tbx18         | ENSMUSG00000032419 | 993  | 0.14 | 0.13 | 0.07 | 0.13 | 0.09 | 0.13 |
| chr9 | 14664505  | 14664852  | Gpr83         | ENSMUSG00000031932 | 24   | 0.26 | 0.12 | 0.08 | 0.18 | 0.12 | 0.14 |
| chr9 | 44142502  | 44143664  | H2afx         | ENSMUSG00000049932 | 285  | 0.19 | 0.09 | 0.07 | 0.12 | 0.12 | 0.1  |
| chr9 | 56265477  | 56266031  | C230081A13Rik | ENSMUSG00000074305 | 103  | 0.16 | 0.13 | 0.11 | 0.2  | 0.06 | 0.11 |
| chr9 | 64658923  | 64659857  | Dennd4a       | ENSMUSG00000053641 | 243  | 0.26 | 0.36 | 0.14 | 0.14 | 0.07 | 0.11 |
| chr9 | 108208186 | 108209261 | Tcta          | ENSMUSG00000039461 | -441 | 0.23 | 0.42 | 0.11 | 0.16 | 0.11 | 0.18 |
| chr9 | 25059564  | 25060974  | 7-Sep         | ENSMUSG00000001833 | 100  | 0.22 | 0.14 | 0.1  | 0.14 | 0.12 | 0.14 |
| chr9 | 22215811  | 22216262  | 9530077C05Rik | ENSMUSG00000036411 | 15   | 0.83 | 0.55 | 0.13 | 0.16 | 0.38 | 0.11 |
| chr9 | 28210827  | 28211295  | Opcml         | ENSMUSG00000062257 | -321 | 0.18 | 0.1  | 0.15 | 0.21 | 0.06 | 0.14 |
| chr9 | 106072956 | 106073604 | Wdr82         | ENSMUSG00000020257 | 20   | 0.22 | 0.09 | 0.09 | 0.13 | 0.1  | 0.11 |
| chr9 | 106793885 | 106794892 | Manf          | ENSMUSG00000032575 | -187 | 0.25 | 0.08 | 0.1  | 0.18 | 0.14 | 0.12 |
| chr9 | 21229322  | 21229818  | Dnm2          | ENSMUSG00000033335 | 218  | 0.15 | 0.07 | 0.13 | 0.21 | 0.07 | 0.19 |
| chr9 | 71958666  | 71960047  | Tcf12         | ENSMUSG00000032228 | 270  | 0.11 | 0.1  | 0.08 | 0.11 | 0.07 | 0.12 |
| chr9 | 111213868 | 111215308 | Trank1        | ENSMUSG00000062296 | 345  | 0.14 | 0.15 | 0.11 | 0.11 | 0.1  | 0.11 |
| chr9 | 123438698 | 123439315 | Sacm1l        | ENSMUSG00000025240 | 6    | 0.21 | 0.22 | 0.11 | 0.26 | 0.1  | 0.19 |
| chr9 | 23026806  | 23028353  | Bmper         | ENSMUSG00000031963 | 59   | 0.16 | 0.17 | 0.11 | 0.16 | 0.09 | 0.09 |
| chr9 | 44075965  | 44076309  | Nlrx1         | ENSMUSG00000032109 | 133  | 0.14 | 0.14 | 0.09 | 0.13 | 0.08 | 0.16 |
| chr9 | 102255568 | 102257038 | Ephb1         | ENSMUSG00000032537 | 720  | 0.21 | 0.1  | 0.1  | 0.16 | 0.11 | 0.15 |
| chr9 | 121668326 | 121669739 | E530011L22Rik | ENSMUSG00000091138 | -126 | 0.18 | 0.19 | 0.1  | 0.15 | 0.12 | 0.13 |
| chr9 | 78243407  | 78244094  | Ddx43         | ENSMUSG00000070291 | 166  | 0.1  | 0.18 | 0.12 | 0.19 | 0.19 | 0.16 |
| chr9 | 99258250  | 99258979  | Esyt3         | ENSMUSG00000037681 | 335  | 0.35 | 0.31 | 0.11 | 0.18 | 0.19 | 0.15 |
| chr9 | 107453745 | 107454246 | Rassf1        | ENSMUSG00000010067 | 109  | 0.2  | 0.13 | 0.09 | 0.21 | 0.11 | 0.18 |
| chr9 | 66822636  | 66823349  | Lactb         | ENSMUSG00000032370 | 226  | 0.52 | 0.25 | 0.14 | 0.16 | 0.27 | 0.18 |
| chr9 | 18277988  | 18278233  | Zfp558        | ENSMUSG00000074500 | -107 | 0.28 | 0.13 | 0.12 | 0.18 | 0.08 | 0.12 |
| chr9 | 42751980  | 42753079  | Grik4         | ENSMUSG00000032017 | 47   | 0.12 | 0.16 | 0.12 | 0.18 | 0.08 | 0.13 |
| chr9 | 66642995  | 66643771  | Aph1b         | ENSMUSG00000032375 | -200 | 0.21 | 0.11 | 0.17 | 0.19 | 0.07 | 0.15 |
| chr9 | 83039464  | 83040326  | Hmgn3         | ENSMUSG00000066456 | 182  | 0.18 | 0.13 | 0.09 | 0.1  | 0.09 | 0.13 |
| chr9 | 91257185  | 91257441  | Zic4          | ENSMUSG00000036972 | 62   | 0.35 | 0.11 | 0.14 | 0.26 | 0.14 | 0.17 |
| chr9 | 108008493 | 108008913 | F630040L22Rik | ENSMUSG00000087645 | 1407 | 0.95 | 1    | 0.6  | 0.56 | 0.77 | 0.85 |
| chr9 | 121619377 | 121619896 | Deb1          | ENSMUSG00000032526 | 129  | 0.23 | 0.23 | 0.3  | 0.29 | 0.09 | 0.16 |

|      |           |           |               |                     |       |      |      |      |      |      |      |
|------|-----------|-----------|---------------|---------------------|-------|------|------|------|------|------|------|
| chr9 | 122075661 | 122076080 | Snrk          | ENSMUSG00000038145  | 8     | 0.86 | 0.88 | 0.86 | 0.85 | 0.91 | 0.89 |
| chr9 | 20871357  | 20871668  | Zglp1         | ENSMUSG00000079681  | 25    | 0.83 | 0.62 | 0.7  | 0.64 | 0.98 | 0.81 |
| chr9 | 30729061  | 30730162  | Adamts15      | ENSMUSG00000033453  | 426   | 0.15 | 0.19 | 0.08 | 0.13 | 0.26 | 0.16 |
| chr9 | 96789308  | 96790362  | Acpl2         | ENSMUSG00000043587  | -3    | 0.23 | 0.25 | 0.12 | 0.15 | 0.11 | 0.17 |
| chr9 | 121748072 | 121748657 | Ccdc13        | ENSMUSG00000079235  | 215   | 0.17 | 0.1  | 0.13 | 0.24 | 0.1  | 0.2  |
| chr9 | 40494137  | 40494730  | 9030425E11Rik | ENSMUSG00000032024  | 315   | 0.18 | 0.26 | 0.13 | 0.15 | 0.09 | 0.1  |
| chr9 | 43874912  | 43875327  | Usp2          | ENSMUSG00000032010  | 15    | 0.29 | 0.17 | 0.15 | 0.16 | 0.09 | 0.18 |
| chr9 | 106062184 | 106062456 | Glyctk        | ENSMUSG00000020258  | -1851 | 0.58 | 0.41 | 0.1  | 0.29 | 0.22 | 0.24 |
| chr9 | 83818607  | 83818919  | Bckdhb        | ENSMUSG00000032263  | 6     | 0.12 | 0.13 | 0.09 | 0.12 | 0.05 | 0.07 |
| chr9 | 88333352  | 88334257  | Snx14         | ENSMUSG00000032422  | -68   | 0.52 | 0.21 | 0.31 | 0.12 | 0.26 | 0.31 |
| chr9 | 77955852  | 77956588  | Fbxo9         | ENSMUSG0000001366   | 174   | 0.29 | 0.17 | 0.1  | 0.15 | 0.18 | 0.15 |
| chr9 | 114752783 | 114753318 | Cmtm8         | ENSMUSG00000041012  | 220   | 0.2  | 0.11 | 0.11 | 0.17 | 0.11 | 0.13 |
| chr9 | 108551021 | 108551868 | Gm10621       | ENSMUSG00000074075  | 273   | 0.15 | 0.19 | 0.26 | 0.24 | 0.24 | 0.17 |
| chr9 | 118515716 | 118516445 | Itga9         | ENSMUSG00000039115  | 272   | 0.12 | 0.1  | 0.07 | 0.11 | 0.07 | 0.09 |
| chr9 | 21921288  | 21921787  | Elof1         | ENSMUSG00000013822  | 55    | 0.06 | 0.09 | 0.08 | 0.2  | 0.21 | 0.12 |
| chr9 | 108419006 | 108420262 | Qrich1        | ENSMUSG00000006673  | 216   | 0.08 | 0.11 | 0.1  | 0.11 | 0.13 | 0.14 |
| chr9 | 32348057  | 32348974  | Fli1          | ENSMUSG00000016087  | 459   | 0.29 | 0.27 | 0.15 | 0.19 | 0.17 | 0.19 |
| chr9 | 71333216  | 71333852  | Polr2m        | ENSMUSG00000032199  | 183   | 0.13 | 0.19 | 0.1  | 0.25 | 0.08 | 0.13 |
| chr9 | 119846567 | 119846897 | Gorasp1       | ENSMUSG00000032513  | -56   | 0.2  | 0.04 | 0.13 | 0.14 | 0.09 | 0.07 |
| chr9 | 51856101  | 51857120  | Rdx           | ENSMUSG00000032050  | 564   | 0.19 | 0.12 | 0.07 | 0.11 | 0.1  | 0.12 |
| chr9 | 55889617  | 55890136  | Rcn2          | ENSMUSG00000032320  | 224   | 0.38 | 0.67 | 0.13 | 0.24 | 0.09 | 0.16 |
| chr9 | 95459615  | 95461284  | Paqr9         | ENSMUSG000000064225 | 213   | 0.12 | 0.18 | 0.11 | 0.17 | 0.18 | 0.13 |
| chr9 | 66682229  | 66683196  | Aph1c         | ENSMUSG00000053040  | -257  | 0.16 | 0.15 | 0.11 | 0.14 | 0.09 | 0.12 |
| chr9 | 96096530  | 96097168  | Tfdp2         | ENSMUSG00000032411  | 155   | 0.26 | 0.25 | 0.16 | 0.21 | 0.15 | 0.14 |
| chr9 | 108710585 | 108711046 | Nckipsd       | ENSMUSG00000032598  | 85    | 0.15 | 0.14 | 0.14 | 0.2  | 0.32 | 0.12 |
| chr9 | 15513989  | 15514489  | Slc36a4       | ENSMUSG000000043885 | 57    | 0.13 | 0.21 | 0.11 | 0.11 | 0.07 | 0.12 |
| chr9 | 20325644  | 20326204  | Zfp266        | ENSMUSG000000060510 | -72   | 0.56 | 0.39 | 0.08 | 0.17 | 0.2  | 0.2  |
| chr9 | 40964923  | 40965782  | Ubash3b       | ENSMUSG00000032020  | 233   | 0.15 | 0.23 | 0.1  | 0.14 | 0.07 | 0.13 |
| chr9 | 70350873  | 70351684  | Rnf111        | ENSMUSG00000032217  | -117  | 0.12 | 0.15 | 0.12 | 0.15 | 0.08 | 0.11 |
| chr9 | 72772962  | 72773892  | Pygo1         | ENSMUSG00000034910  | -25   | 0.21 | 0.22 | 0.1  | 0.15 | 0.14 | 0.13 |

|      |           |           |               |                     |      |      |      |      |      |      |      |
|------|-----------|-----------|---------------|---------------------|------|------|------|------|------|------|------|
| chr9 | 107672698 | 107673436 | Rbm5          | ENSMUSG00000032580  | 266  | 0.24 | 0.46 | 0.11 | 0.26 | 0.04 | 0.16 |
| chr9 | 120842296 | 120843673 | Ctnnb1        | ENSMUSG00000006932  | 466  | 0.13 | 0.08 | 0.09 | 0.15 | 0.08 | 0.13 |
| chr9 | 77602323  | 77603030  | Gclc          | ENSMUSG000000032350 | 334  | 0.2  | 0.16 | 0.11 | 0.1  | 0.11 | 0.16 |
| chr9 | 121613855 | 121614417 | Sec22c        | ENSMUSG000000061536 | -39  | 0.25 | 0.25 | 0.11 | 0.19 | 0.1  | 0.18 |
| chr9 | 77765079  | 77765823  | Elovl5        | ENSMUSG000000032349 | 280  | 0.09 | 0.1  | 0.07 | 0.13 | 0.19 | 0.1  |
| chr9 | 40262923  | 40263732  | Gramd1b       | ENSMUSG000000040111 | -72  | 0.12 | 0.1  | 0.11 | 0.12 | 0.06 | 0.09 |
| chr9 | 89949360  | 89949566  | Ctsh          | ENSMUSG000000032359 | 88   | 1    | 0.1  | 0.09 | NA   | 0.04 | 0.23 |
| chr9 | 56712791  | 56713020  | Cspg4         | ENSMUSG000000032911 | -6   | 0.22 | 0.19 | 0.1  | 0.12 | 0.06 | 0.24 |
| chr9 | 99336693  | 99337589  | Mras          | ENSMUSG000000032470 | -4   | 0.14 | 0.17 | 0.16 | 0.19 | 0.2  | 0.13 |
| chr9 | 61794097  | 61794782  | Kif23         | ENSMUSG000000032254 | 103  | 0.16 | 0.1  | 0.1  | 0.17 | 0.34 | 0.12 |
| chr9 | 107133599 | 107134471 | Dock3         | ENSMUSG000000039716 | -122 | 0.15 | 0.09 | 0.08 | 0.13 | 0.08 | 0.16 |
| chr9 | 114842492 | 114843152 | Gpd1l         | ENSMUSG000000050627 | 175  | 0.16 | 0.18 | 0.08 | 0.16 | 0.09 | 0.1  |
| chr9 | 7836877   | 7837494   | C330006D17Rik | ENSMUSG000000049742 | -121 | 0.27 | 0.09 | 0.12 | 0.16 | 0.07 | 0.1  |
| chr9 | 110760375 | 110760771 | Prss50        | ENSMUSG000000048752 | 102  | 0.23 | 0.21 | 0.14 | 0.2  | 0.14 | 0.11 |
| chr9 | 57351757  | 57352547  | Rpp25         | ENSMUSG000000062309 | 243  | 0.14 | 0.32 | 0.12 | 0.17 | 0.23 | 0.15 |
| chr9 | 67688059  | 67688454  | Vps13c        | ENSMUSG000000035284 | 53   | 0.71 | 0.38 | 0.23 | 0.13 | 0.46 | 0.16 |
| chr9 | 20807164  | 20807848  | Mrpl4         | ENSMUSG000000003299 | 325  | 0.29 | 0.13 | 0.12 | 0.22 | 0.1  | 0.19 |
| chr9 | 20264061  | 20264531  | Zfp26         | ENSMUSG000000063108 | -25  | 0.29 | 0.13 | 0.08 | 0.12 | 0.11 | 0.11 |
| chr9 | 110310212 | 110310875 | Ptpn23        | ENSMUSG000000036057 | 171  | 0.15 | 0.44 | 0.08 | 0.16 | 0.29 | 0.16 |
| chr9 | 66767017  | 66767705  | Rab8b         | ENSMUSG000000036943 | 100  | 0.1  | 0.09 | 0.08 | 0.16 | 0.05 | 0.13 |
| chr9 | 75862713  | 75862986  | Hmgcl1        | ENSMUSG000000007908 | 27   | 0.35 | 1    | 0.52 | 1    | 0.62 | 1    |
| chr9 | 91273376  | 91274042  | Zic4          | ENSMUSG000000036972 | 229  | 0.15 | 0.12 | 0.08 | 0.14 | 0.07 | 0.1  |
| chr9 | 98855409  | 98857864  | Foxl2os       | ENSMUSG000000074122 | -907 | 0.15 | 0.16 | 0.12 | 0.16 | 0.1  | 0.17 |
| chr9 | 92352529  | 92352899  | Plscr4        | ENSMUSG000000032377 | 482  | 0.5  | 1    | 0.15 | 0.1  | 0.13 | 0.12 |
| chr9 | 44688895  | 44690363  | Mll1          | ENSMUSG000000002028 | -272 | 0.14 | 0.13 | 0.1  | 0.14 | 0.09 | 0.15 |
| chr9 | 20692546  | 20693014  | Ppan          | ENSMUSG000000004100 | 161  | 0.09 | 0.13 | 0.09 | 0.11 | 0.06 | 0.12 |
| chr9 | 108468885 | 108470149 | Ndufaf3       | ENSMUSG000000070283 | 156  | 0.28 | 0.11 | 0.12 | 0.2  | 0.14 | 0.22 |
| chr9 | 121904782 | 121905176 | C85492        | ENSMUSG000000066235 | 165  | 0.47 | 0.15 | 0.15 | 0.1  | 0.18 | 0.18 |
| chr9 | 65141801  | 65142773  | Clpx          | ENSMUSG000000015357 | 220  | 0.24 | 0.3  | 0.13 | 0.21 | 0.16 | 0.17 |
| chr9 | 20449179  | 20449480  | Fbxl12        | ENSMUSG000000066892 | -143 | 1    | 0.05 | 0.15 | 0.13 | 0.06 | 0.16 |

|      |           |           |          |                     |      |      |      |      |      |      |      |
|------|-----------|-----------|----------|---------------------|------|------|------|------|------|------|------|
| chr9 | 119353954 | 119354295 | Exog     | ENSMUSG00000042787  | 83   | 0.17 | 0.06 | 0.1  | 0.1  | 0.07 | 0.11 |
| chr9 | 106331807 | 106332200 | Rpl29    | ENSMUSG00000048758  | 133  | 0.29 | 0.24 | 0.11 | 0.13 | 0.05 | 0.29 |
| chr9 | 96918456  | 96919524  | Spsb4    | ENSMUSG00000046997  | 193  | 0.38 | 0.15 | 0.18 | 0.15 | 0.21 | 0.15 |
| chr9 | 120401499 | 120402202 | Eif1b    | ENSMUSG00000006941  | 126  | 0.19 | 0.09 | 0.08 | 0.12 | 0.14 | 0.09 |
| chr9 | 79914451  | 79915744  | Senp6    | ENSMUSG000000034252 | 387  | 0.22 | 0.15 | 0.12 | 0.15 | 0.15 | 0.13 |
| chr9 | 113650285 | 113651253 | Clasp2   | ENSMUSG000000033392 | 178  | 0.18 | 0.09 | 0.09 | 0.18 | 0.13 | 0.13 |
| chr9 | 26806855  | 26807299  | Acad8    | ENSMUSG000000031969 | 13   | 0.05 | 0.17 | 0.12 | 0.21 | 0.29 | 0.1  |
| chr9 | 123021969 | 123022628 | Zdhhc3   | ENSMUSG000000025786 | -59  | 0.08 | 0.18 | 0.1  | 0.25 | 0.15 | 0.13 |
| chr9 | 54711424  | 54711925  | Ireb2    | ENSMUSG000000032293 | 112  | 0.09 | 0.16 | 0.12 | 0.17 | 0.18 | 0.15 |
| chr9 | 8901405   | 8902030   | Pgr      | ENSMUSG000000031870 | 268  | 0.12 | 0.06 | 0.12 | 0.07 | 0.07 | 0.1  |
| chr9 | 65062942  | 65063468  | Parp16   | ENSMUSG000000032392 | 251  | 0.31 | 0.2  | 0.11 | 0.17 | 0.19 | 0.19 |
| chr9 | 79566249  | 79567057  | Col12a1  | ENSMUSG000000032332 | -352 | 0.24 | 0.21 | 0.16 | 0.12 | 0.13 | 0.16 |
| chr9 | 108838666 | 108839205 | Uqcrc1   | ENSMUSG000000025651 | 211  | 1    | 0.09 | 0.07 | 0.11 | 0.07 | 0.16 |
| chr9 | 106587653 | 106588370 | Tex264   | ENSMUSG000000040813 | -13  | 0.25 | 0.22 | 0.13 | 0.15 | 0.14 | 0.15 |
| chr9 | 15110590  | 15111036  | Taf1d    | ENSMUSG000000031939 | 155  | 0.18 | 0.35 | 0.09 | 0.18 | 0.1  | 0.13 |
| chr9 | 69301444  | 69301932  | Anxa2    | ENSMUSG000000032231 | 165  | 0.09 | 0.15 | 0.12 | 0.08 | 0.05 | 0.13 |
| chr9 | 100445767 | 100446762 | Nck1     | ENSMUSG000000032475 | 208  | 0.18 | 0.32 | 0.08 | 0.15 | 0.11 | 0.12 |
| chr9 | 105396875 | 105397924 | Atp2c1   | ENSMUSG000000032570 | -459 | 0.13 | 0.16 | 0.11 | 0.16 | 0.08 | 0.1  |
| chr9 | 9238697   | 9239289   | Arhgap42 | ENSMUSG000000050730 | 20   | 0.52 | 0.37 | 0.11 | 0.26 | 0.2  | 0.17 |
| chr9 | 14649712  | 14650204  | Gm16302  | ENSMUSG000000090023 | -99  | 0.96 | 0.95 | 0.77 | 0.8  | 0.88 | 0.9  |
| chr9 | 20531875  | 20532499  | Olfm2    | ENSMUSG000000032172 | 486  | 0.08 | 0.13 | 0.14 | 0.11 | 0.21 | 0.16 |
| chr9 | 21397207  | 21398099  | Yipf2    | ENSMUSG000000032182 | -430 | 0.11 | 0.1  | 0.09 | 0.18 | 0.06 | 0.14 |
| chr9 | 24955589  | 24956525  | Herpud2  | ENSMUSG000000008429 | 223  | 0.18 | 0.11 | 0.08 | 0.15 | 0.12 | 0.15 |
| chr9 | 26962612  | 26963093  | Jam3     | ENSMUSG000000031990 | 113  | 0.15 | 0.09 | 0.06 | 0.13 | 0.09 | 0.12 |
| chr9 | 50535826  | 50536396  | Dixdc1   | ENSMUSG000000032064 | -68  | 0.5  | 0.14 | 0.18 | 0.12 | 0.12 | 0.14 |
| chr9 | 91258911  | 91260300  | Zic1     | ENSMUSG000000032368 | 1001 | 0.16 | 0.19 | 0.09 | 0.18 | 0.12 | 0.15 |
| chr9 | 99039974  | 99040917  | Pik3cb   | ENSMUSG000000032462 | -101 | 0.1  | 0.11 | 0.09 | 0.11 | 0.07 | 0.1  |
| chr9 | 107456429 | 107457456 | Rassf1   | ENSMUSG000000010067 | -45  | 0.18 | 0.17 | 0.09 | 0.14 | 0.12 | 0.13 |
| chr9 | 30837723  | 30838904  | Zbtb44   | ENSMUSG000000047412 | 84   | 0.2  | 0.14 | 0.17 | 0.12 | 0.13 | 0.19 |
| chr9 | 106270736 | 106271784 | Dusp7    | ENSMUSG000000053716 | 297  | 0.27 | 0.21 | 0.11 | 0.15 | 0.19 | 0.15 |

|      |           |           |         |                    |      |      |      |      |      |      |      |
|------|-----------|-----------|---------|--------------------|------|------|------|------|------|------|------|
| chr9 | 123587384 | 123588077 | Ccr9    | ENSMUSG00000029530 | 173  | 0.17 | 0.23 | 0.24 | 0.29 | 0.06 | 0.14 |
| chr9 | 48642783  | 48644452  | Zbtb16  | ENSMUSG00000066687 | 433  | 0.16 | 0.19 | 0.09 | 0.14 | 0.22 | 0.12 |
| chr9 | 71619040  | 71619603  | Cgnl1   | ENSMUSG00000032232 | 46   | 0.36 | 0.26 | 0.12 | 0.15 | 0.21 | 0.2  |
| chr9 | 72509690  | 72510864  | Nedd4   | ENSMUSG00000032216 | -87  | 0.2  | 0.15 | 0.09 | 0.17 | 0.06 | 0.12 |
| chr9 | 120036618 | 120037281 | Rpsa    | ENSMUSG00000032518 | 65   | 0.18 | 0.14 | 0.1  | 0.13 | 0.08 | 0.1  |
| chr9 | 121550748 | 121552229 | Lyzl4   | ENSMUSG00000032530 | -274 | 0.16 | 0.18 | 0.16 | 0.12 | 0.09 | 0.15 |
| chr9 | 20702708  | 20703173  | Eif3g   | ENSMUSG00000070319 | 104  | 0.15 | 0.2  | 0.1  | 0.23 | 0.1  | 0.15 |
| chr9 | 36604458  | 36605026  | Ei24    | ENSMUSG00000062762 | -89  | 0.23 | 0.13 | 0.08 | 0.14 | 0.15 | 0.14 |
| chr9 | 50506780  | 50507456  | Dixdc1  | ENSMUSG00000032064 | 349  | 0.05 | 0.07 | 0.1  | 0.13 | 0.1  | 0.14 |
| chr9 | 62827913  | 62829089  | Pias1   | ENSMUSG00000032405 | 185  | 0.23 | 0.14 | 0.15 | 0.17 | 0.16 | 0.16 |
| chr9 | 63450271  | 63450712  | Iqch    | ENSMUSG00000037801 | -201 | 0.11 | 0.14 | 0.08 | 0.09 | 0.07 | 0.11 |
| chr9 | 85736380  | 85738096  | Tpbp    | ENSMUSG00000035274 | 779  | 0.24 | 0.32 | 0.16 | 0.15 | 0.17 | 0.14 |
| chr9 | 14588859  | 14589454  | Mre11a  | ENSMUSG00000031928 | 58   | 0.16 | 0.13 | 0.11 | 0.26 | 0.07 | 0.14 |
| chr9 | 49604895  | 49606625  | Ncam1   | ENSMUSG00000039542 | 1074 | 0.5  | 0.22 | 0.09 | 0.21 | 0.25 | 0.17 |
| chr9 | 65435569  | 65436089  | Pif1    | ENSMUSG00000041064 | 796  | 0.11 | 0.12 | 0.18 | 0.11 | 0.07 | 0.13 |
| chr9 | 81757148  | 81757612  | Mei4    | ENSMUSG00000043289 | 103  | 1    | 1    | 0.08 | 0.23 | 0.08 | 0.17 |
| chr9 | 107838215 | 107838571 | Camkv   | ENSMUSG00000032936 | 142  | 0.19 | 0.11 | 0.11 | 0.16 | 0.1  | 0.2  |
| chr9 | 108685969 | 108686287 | Ip6k2   | ENSMUSG00000032599 | 1    | 1    | 0.27 | 0.16 | 0.14 | 0.08 | 0.17 |
| chr9 | 40608748  | 40609797  | Hspa8   | ENSMUSG00000015656 | 205  | 0.28 | 0.19 | 0.13 | 0.17 | 0.17 | 0.16 |
| chr9 | 56919995  | 56921151  | Sin3a   | ENSMUSG00000042557 | 726  | 0.1  | 0.13 | 0.12 | 0.15 | 0.15 | 0.15 |
| chr9 | 64100925  | 64101667  | Map2k1  | ENSMUSG00000004936 | 142  | 0.12 | 0.15 | 0.1  | 0.13 | 0.07 | 0.12 |
| chr9 | 21042974  | 21043844  | Keap1   | ENSMUSG00000003308 | 367  | 0.21 | 0.21 | 0.1  | 0.18 | 0.16 | 0.17 |
| chr9 | 65477760  | 65479042  | Rbpms2  | ENSMUSG00000032387 | 12   | 0.21 | 0.19 | 0.11 | 0.15 | 0.15 | 0.13 |
| chr9 | 119231002 | 119232229 | Oxsr1   | ENSMUSG00000036737 | -175 | 0.12 | 0.16 | 0.1  | 0.18 | 0.16 | 0.13 |
| chr9 | 61218453  | 61219456  | Gm10655 | ENSMUSG00000074256 | 1046 | 0.22 | 0.08 | 0.16 | 0.1  | 0.14 | 0.12 |
| chr9 | 72961212  | 72961588  | Rsl24d1 | ENSMUSG00000032215 | 167  | 0.12 | 0.25 | 0.12 | 0.15 | 0.06 | 0.14 |
| chr9 | 95757906  | 95758665  | Atr     | ENSMUSG00000032409 | 269  | 0.19 | 0.21 | 0.1  | 0.18 | 0.13 | 0.17 |
| chr9 | 99530001  | 99530463  | Dzip1l  | ENSMUSG00000037784 | -30  | 0.44 | 0.1  | 0.11 | 0.14 | 0.26 | 0.11 |
| chr9 | 99775508  | 99776838  | Sox14   | ENSMUSG00000053747 | 63   | 0.15 | 0.2  | 0.14 | 0.17 | 0.09 | 0.13 |
| chr9 | 54613284  | 54613707  | Crabp1  | ENSMUSG00000032291 | 940  | 1    | 0.09 | 0.13 | 0.16 | 0.06 | 0.17 |

|      |           |           |               |                    |      |      |      |      |      |      |      |
|------|-----------|-----------|---------------|--------------------|------|------|------|------|------|------|------|
| chr9 | 121627930 | 121629170 | Nktr          | ENSMUSG00000032525 | 263  | 0.15 | 0.23 | 0.14 | 0.21 | 0.1  | 0.14 |
| chr9 | 57109331  | 57110620  | 1700017B05Rik | ENSMUSG00000032300 | 431  | 0.17 | 0.1  | 0.12 | 0.12 | 0.12 | 0.16 |
| chr9 | 63604921  | 63606357  | Smad3         | ENSMUSG00000032402 | 162  | 0.11 | 0.17 | 0.12 | 0.12 | 0.15 | 0.14 |
| chr9 | 72122483  | 72123209  | Zfp280d       | ENSMUSG00000038535 | 140  | 0.28 | 0.33 | 0.1  | 0.18 | 0.21 | 0.12 |
| chr9 | 43892814  | 43893370  | Usp2          | ENSMUSG00000032010 | 59   | 0.12 | 0.19 | 0.16 | 0.19 | 0.2  | 0.15 |
| chr9 | 107981488 | 107981728 | Rnf123        | ENSMUSG00000041528 | -11  | 0.24 | 0.13 | 0.07 | 0.13 | 0.1  | 0.11 |
| chr9 | 111020416 | 111021155 | Lrrfip2       | ENSMUSG00000032497 | 170  | 0.11 | 0.09 | 0.1  | 0.12 | 0.08 | 0.12 |
| chr9 | 20836220  | 20836728  | Icam5         | ENSMUSG00000032174 | -8   | 0.33 | 0.19 | 0.12 | 0.12 | 0.08 | 0.09 |
| chr9 | 44773520  | 44773800  | Ube4a         | ENSMUSG00000059890 | -58  | 0.12 | 0.19 | 0.08 | 0.1  | 0.07 | 0.14 |
| chr9 | 78435413  | 78435979  | Slc17a5       | ENSMUSG00000049624 | 126  | 0.13 | 0.13 | 0.12 | 0.09 | 0.06 | 0.1  |
| chr9 | 20446442  | 20446908  | Fbxl12        | ENSMUSG00000066892 | 82   | 0.1  | 0.18 | 0.14 | 0.18 | 0.2  | 0.14 |
| chr9 | 46081229  | 46081571  | Zfp259        | ENSMUSG00000032078 | 141  | 0.13 | 0.13 | 0.14 | 0.08 | 0.07 | 0.08 |
| chr9 | 50424885  | 50425693  | AU019823      | ENSMUSG00000059820 | 80   | 0.23 | 0.19 | 0.14 | 0.22 | 0.33 | 0.17 |
| chr9 | 21069640  | 21070107  | Atg4d         | ENSMUSG00000002820 | 130  | 0.14 | 0.16 | 0.15 | 0.13 | 0.2  | 0.18 |
| chr9 | 44863215  | 44863511  | Mpzl3         | ENSMUSG00000070305 | 94   | 0.33 | 0.33 | 0.16 | 0.18 | 0.09 | 0.23 |
| chr9 | 36954043  | 36954499  | Pknox2        | ENSMUSG00000035934 | 580  | 0.37 | 0.26 | 0.11 | 0.15 | 0.25 | 0.16 |
| chr9 | 44095680  | 44096437  | Abcg4         | ENSMUSG00000032131 | 163  | 0.07 | 0.2  | 0.07 | 0.15 | 0.11 | 0.16 |
| chr9 | 79607297  | 79607769  | Cox7a2        | ENSMUSG00000032330 | 127  | 0.21 | 0.2  | 0.11 | 0.14 | 0.14 | 0.15 |
| chr9 | 89803469  | 89805995  | Rasgrf1       | ENSMUSG00000032356 | 119  | 0.28 | 0.14 | 0.15 | 0.21 | 0.22 | 0.18 |
| chr9 | 103104045 | 103104470 | Srprb         | ENSMUSG00000032553 | 202  | 0.15 | 0.28 | 0.14 | 0.26 | 0.26 | 0.21 |
| chr9 | 105033714 | 105034177 | Nudt16        | ENSMUSG00000032565 | 190  | 0.16 | 0.25 | 0.2  | 0.21 | 0.1  | 0.13 |
| chr9 | 106349722 | 106350076 | Abhd14a       | ENSMUSG00000042210 | 110  | 0.5  | 0.44 | 0.5  | 0.28 | 0.08 | 0.1  |
| chr9 | 109833961 | 109835091 | Mtap4         | ENSMUSG00000032479 | 564  | 0.13 | 0.15 | 0.12 | 0.14 | 0.19 | 0.14 |
| chr9 | 3199798   | 3200105   | 4930433N12Rik | ENSMUSG00000042360 | -169 | 0.61 | 0.55 | 0.71 | 0.87 | 0.38 | 0.5  |
| chr9 | 27106596  | 27108188  | Igsf9b        | ENSMUSG00000034275 | 579  | 0.11 | 0.07 | 0.12 | 0.17 | 0.08 | 0.16 |
| chr9 | 48303151  | 48304030  | Rbm7          | ENSMUSG00000042396 | -180 | 0.18 | 0.12 | 0.11 | 0.14 | 0.13 | 0.14 |
| chr9 | 53055850  | 53056412  | Ddx10         | ENSMUSG00000053289 | 86   | 0.4  | 0.5  | 0.17 | 0.26 | 0.12 | 0.17 |
| chr9 | 64233449  | 64235040  | Megf11        | ENSMUSG00000036466 | 754  | 0.12 | 0.11 | 0.09 | 0.15 | 0.15 | 0.12 |
| chr9 | 64808580  | 64808960  | 2010321M09Rik | ENSMUSG00000034263 | 131  | 0.08 | 0.13 | 0.16 | 0.1  | 0.05 | 0.15 |
| chr9 | 32503193  | 32503842  | Ets1          | ENSMUSG00000032035 | -110 | 0.28 | 0.19 | 0.15 | 0.15 | 0.47 | 0.24 |



|      |           |           |               |                     |      |      |      |      |      |      |      |
|------|-----------|-----------|---------------|---------------------|------|------|------|------|------|------|------|
| chr9 | 77960936  | 77961433  | Ick           | ENSMUSG00000009828  | 136  | 0.13 | 0.17 | 0.1  | 0.14 | 0.09 | 0.13 |
| chr9 | 89599529  | 89600171  | Tmed3         | ENSMUSG000000032353 | 31   | 0.23 | 0.25 | 0.1  | 0.18 | 0.12 | 0.17 |
| chr9 | 22272076  | 22272784  | Rp9           | ENSMUSG000000032239 | 351  | 0.1  | 0.12 | 0.1  | 0.12 | 0.07 | 0.12 |
| chr9 | 30234531  | 30234981  | Snx19         | ENSMUSG000000031993 | 63   | 0.18 | 0.1  | 0.1  | 0.12 | 0.11 | 0.16 |
| chr9 | 13630867  | 13632673  | Cep57         | ENSMUSG000000031922 | -371 | 0.12 | 0.16 | 0.09 | 0.15 | 0.09 | 0.12 |
| chr9 | 75473263  | 75474142  | Lysmd2        | ENSMUSG000000032184 | 163  | 0.26 | 0.11 | 0.08 | 0.1  | 0.19 | 0.13 |
| chr9 | 106558156 | 106558410 | Grm2          | ENSMUSG000000023192 | 157  | 0.23 | 0.12 | 0.11 | 0.15 | 0.1  | 0.12 |
| chr9 | 20456423  | 20456973  | Pin1          | ENSMUSG000000032171 | 124  | 0.12 | 0.07 | 0.1  | 0.1  | 0.07 | 0.14 |
| chr9 | 47337814  | 47339957  | Cadm1         | ENSMUSG000000032076 | 629  | 0.14 | 0.12 | 0.12 | 0.16 | 0.12 | 0.15 |
| chr9 | 54348832  | 54349430  | Dmxl2         | ENSMUSG000000041268 | 172  | 0.12 | 0.14 | 0.1  | 0.14 | 0.16 | 0.1  |
| chr9 | 107471329 | 107471922 | Hyal2         | ENSMUSG000000010047 | 177  | 0.17 | 0.16 | 0.09 | 0.13 | 0.1  | 0.14 |
| chr9 | 51572966  | 51574322  | Arhgap20      | ENSMUSG000000053199 | 202  | 0.18 | 0.27 | 0.09 | 0.15 | 0.14 | 0.15 |
| chr9 | 35018411  | 35019249  | Foxred1       | ENSMUSG000000039048 | -348 | 0.1  | 0.08 | 0.11 | 0.15 | 0.07 | 0.15 |
| chr9 | 58402672  | 58403113  | Cd276         | ENSMUSG000000035914 | 47   | 0.12 | 0.14 | 0.11 | 0.1  | 0.06 | 0.12 |
| chr9 | 62686576  | 62686792  | Cln6          | ENSMUSG000000032245 | 92   | 0.25 | 0.12 | 0.1  | 0.17 | 0.08 | 0.09 |
| chr9 | 101153384 | 101154121 | Ppp2r3a       | ENSMUSG000000043154 | 410  | 0.26 | 0.22 | 0.1  | 0.14 | 0.18 | 0.14 |
| chr9 | 35377247  | 35378115  | Hyls1         | ENSMUSG000000050555 | 1    | 0.17 | 0.1  | 0.08 | 0.13 | 0.11 | 0.17 |
| chr9 | 50664912  | 50665580  | Ppp2r1b       | ENSMUSG000000032058 | 217  | 0.16 | 0.12 | 0.1  | 0.14 | 0.12 | 0.15 |
| chr9 | 59504052  | 59505368  | Pkm2          | ENSMUSG000000032294 | 327  | 0.25 | 0.45 | 0.09 | 0.14 | 0.11 | 0.16 |
| chr9 | 109777887 | 109778887 | Cdc25a        | ENSMUSG000000032477 | 304  | 0.14 | 0.14 | 0.1  | 0.14 | 0.18 | 0.15 |
| chr9 | 50336483  | 50336888  | Pts           | ENSMUSG000000032067 | 61   | 0.6  | 0.52 | 0.15 | 0.24 | 0.3  | 0.22 |
| chr9 | 60535791  | 60536032  | Lrrc49        | ENSMUSG000000047766 | 14   | 0.07 | 0.29 | 0.12 | 0.22 | 0.14 | 0.17 |
| chr9 | 72286181  | 72286426  | Mns1          | ENSMUSG000000032221 | -33  | 0.11 | 0.09 | 0.1  | 0.17 | 0.06 | 0.06 |
| chr9 | 49148417  | 49149065  | Drd2          | ENSMUSG000000032259 | 9    | 0.09 | 0.21 | 0.21 | 0.19 | 0.13 | 0.15 |
| chr9 | 57437224  | 57437611  | Ulk3          | ENSMUSG000000032308 | 158  | 0.25 | 0.18 | 0.11 | 0.4  | 0.19 | 0.11 |
| chr9 | 64949022  | 64949739  | Igdcc4        | ENSMUSG000000032816 | 87   | 0.44 | 0.37 | 0.22 | 0.23 | 0.35 | 0.14 |
| chr9 | 114548945 | 114549402 | Cnot10        | ENSMUSG000000056167 | 19   | 0.14 | 0.2  | 0.11 | 0.18 | 0.1  | 0.17 |
| chr9 | 67607491  | 67608521  | M5C1000I18Rik | ENSMUSG000000055125 | 9    | 0.1  | 0.09 | 0.12 | 0.16 | 0.07 | 0.14 |
| chr9 | 69606979  | 69609052  | Foxb1         | ENSMUSG000000059246 | 732  | 0.1  | 0.1  | 0.11 | 0.17 | 0.08 | 0.16 |
| chr9 | 59138836  | 59139817  | Adpgk         | ENSMUSG000000025236 | -53  | 0.09 | 0.08 | 0.07 | 0.1  | 0.05 | 0.13 |

|      |           |           |               |                    |      |      |      |      |      |      |      |
|------|-----------|-----------|---------------|--------------------|------|------|------|------|------|------|------|
| chr9 | 79640870  | 79641563  | Tmem30a       | ENSMUSG00000032328 | 21   | 0.12 | 0.08 | 0.1  | 0.13 | 0.09 | 0.1  |
| chr9 | 96378647  | 96379160  | Rnf7          | ENSMUSG00000051234 | 104  | 0.36 | 0.47 | 0.16 | 0.33 | 0.53 | 0.33 |
| chr9 | 20296960  | 20297350  | Zfp426        | ENSMUSG00000059475 | -10  | 0.22 | 1    | 0.09 | 0.18 | 0.07 | 0.08 |
| chr9 | 51975989  | 51976823  | Zc3h12c       | ENSMUSG00000035164 | -190 | 0.11 | 0.17 | 0.07 | 0.16 | 0.08 | 0.11 |
| chr9 | 8042441   | 8042712   | 9230110C19Rik | ENSMUSG00000053070 | 237  | 0.42 | 0.44 | 0.19 | 0.17 | 0.31 | 0.17 |
| chr9 | 57556304  | 57556797  | Edc3          | ENSMUSG00000038957 | 203  | 0.33 | 0.18 | 0.1  | 0.16 | 0.17 | 0.15 |
| chr9 | 98855074  | 98855276  | Foxl2os       | ENSMUSG00000074122 | 554  | 1    | 1    | 0.15 | 0.24 | 0.11 | 0.17 |
| chr9 | 107888108 | 107888483 | 6230427J02Rik | ENSMUSG00000042106 | -85  | 0.06 | 0.11 | 0.07 | 0.17 | 0.11 | 0.21 |
| chr9 | 20757004  | 20757452  | Dnmt1         | ENSMUSG00000004099 | 89   | 1    | 0.24 | 0.12 | 0.14 | 0.14 | 0.11 |
| chr9 | 26837065  | 26838447  | Vps26b        | ENSMUSG00000031988 | -77  | 0.14 | 0.15 | 0.08 | 0.18 | 0.09 | 0.1  |
| chr9 | 56842798  | 56843646  | Ptpn9         | ENSMUSG00000032290 | 447  | 0.12 | 0.19 | 0.11 | 0.12 | 0.08 | 0.12 |
| chr9 | 69137452  | 69139207  | Rora          | ENSMUSG00000032238 | 840  | 0.14 | 0.17 | 0.1  | 0.15 | 0.1  | 0.15 |
| chr9 | 74885432  | 74885954  | Arpp19        | ENSMUSG00000007656 | 209  | 0.14 | 0.12 | 0.09 | 0.14 | 0.1  | 0.13 |
| chr9 | 80012742  | 80013165  | Myo6          | ENSMUSG00000033577 | 115  | 0.12 | 0.06 | 0.12 | 0.15 | 0.09 | 0.14 |
| chr9 | 114277073 | 114277513 | 4930520O04Rik | ENSMUSG00000074039 | -128 | 0.13 | 0.19 | 0.11 | 0.11 | 0.09 | 0.13 |
| chr9 | 114299114 | 114299848 | Crtap         | ENSMUSG00000032431 | 312  | 0.15 | 0.24 | 0.1  | 0.13 | 0.06 | 0.21 |
| chr9 | 122481323 | 122481841 | 9530059O14Rik | ENSMUSG00000086476 | -33  | 0.1  | 0.19 | 0.13 | 0.13 | 0.07 | 0.11 |
| chr9 | 50911504  | 50912152  | Mir34b        | ENSMUSG00000065492 | -78  | 0.19 | 0.2  | 0.14 | 0.18 | 0.23 | 0.21 |
| chr9 | 100543306 | 100544910 | Stag1         | ENSMUSG00000037286 | 241  | 0.13 | 0.31 | 0.13 | 0.15 | 0.16 | 0.17 |
| chr9 | 107301921 | 107302383 | Cacna2d2      | ENSMUSG00000010066 | 209  | 0.22 | 0.24 | 0.11 | 0.09 | 0.19 | 0.07 |
| chr9 | 123626495 | 123626924 | Lztf11        | ENSMUSG00000025245 | -63  | 0.5  | 0.05 | 0.09 | 0.14 | 0.09 | 0.19 |
| chr9 | 43942714  | 43943448  | Mcam          | ENSMUSG00000032135 | 340  | 0.23 | 0.11 | 0.12 | 0.16 | 0.14 | 0.23 |
| chr9 | 59598488  | 59599392  | Myo9a         | ENSMUSG00000039585 | 237  | 0.22 | 0.2  | 0.12 | 0.2  | 0.16 | 0.11 |
| chr9 | 74918734  | 74919730  | Myo5a         | ENSMUSG00000034593 | 410  | 0.25 | 0.48 | 0.17 | 0.31 | 0.34 | 0.16 |
| chr9 | 92145206  | 92145495  | Plscr1        | ENSMUSG00000032369 | 455  | 0.21 | 0.54 | 0.11 | 0.24 | 0.11 | 0.2  |
| chr9 | 113966356 | 113966859 | Susd5         | ENSMUSG00000086596 | 135  | 0.18 | 0.23 | 0.13 | 0.16 | 0.22 | 0.16 |
| chr9 | 15161940  | 15162322  | 5830418K08Rik | ENSMUSG00000046111 | 101  | 0.29 | 0.35 | 0.14 | 0.15 | 0.4  | 0.16 |
| chr9 | 21602884  | 21603358  | Kank2         | ENSMUSG00000032194 | -142 | 0.5  | 0.06 | 0.14 | 0.11 | 0.1  | 0.14 |
| chr9 | 50583313  | 50583979  | Alg9          | ENSMUSG00000032059 | 236  | 0.11 | 0.14 | 0.1  | 0.15 | 0.08 | 0.11 |
| chr9 | 50816448  | 50817548  | Sik2          | ENSMUSG00000037112 | 43   | 0.15 | 0.18 | 0.11 | 0.18 | 0.13 | 0.15 |

|      |           |           |               |                    |      |      |      |      |      |      |      |
|------|-----------|-----------|---------------|--------------------|------|------|------|------|------|------|------|
| chr9 | 59464819  | 59465541  | Parp6         | ENSMUSG00000025237 | 89   | 0.18 | 1    | 0.09 | 0.13 | 0.34 | 0.12 |
| chr9 | 83699375  | 83700125  | Elovl4        | ENSMUSG00000032262 | 162  | 0.22 | 0.22 | 0.18 | 0.26 | 0.17 | 0.16 |
| chr9 | 107489805 | 107490502 | Ifrd2         | ENSMUSG00000010048 | 104  | 0.17 | 0.16 | 0.12 | 0.26 | 0.13 | 0.12 |
| chr9 | 21794336  | 21794662  | Rgl3          | ENSMUSG00000040146 | -602 | 0.15 | 0.21 | 0.3  | 0.36 | 0.22 | 0.22 |
| chr9 | 63867971  | 63871057  | Smad6         | ENSMUSG00000036867 | 352  | 0.16 | 0.13 | 0.11 | 0.15 | 0.18 | 0.13 |
| chr9 | 108728122 | 108728529 | Celsr3        | ENSMUSG00000023473 | -326 | 0.2  | 0.1  | 0.07 | 0.19 | 0.03 | 0.15 |
| chr9 | 120486201 | 120486697 | 5830454E08Rik | ENSMUSG00000052658 | -14  | 0.08 | NA   | 0.1  | 0.08 | 0.2  | 0.17 |
| chr9 | 121766131 | 121767081 | Higd1a        | ENSMUSG00000038412 | 512  | 0.1  | 0.15 | 0.09 | 0.13 | 0.08 | 0.13 |
| chr9 | 4309133   | 4309885   | Aasdhpt       | ENSMUSG00000025894 | -50  | 0.13 | 0.12 | 0.1  | 0.22 | 0.1  | 0.18 |
| chr9 | 7184469   | 7185187   | Dcun1d5       | ENSMUSG00000032002 | 262  | 0.16 | 0.21 | 0.14 | 0.17 | 0.23 | 0.15 |
| chr9 | 48793074  | 48793932  | Usp28         | ENSMUSG00000032267 | 13   | 0.18 | 0.13 | 0.11 | 0.14 | 0.1  | 0.15 |
| chr9 | 63246576  | 63247227  | 2300009A05Rik | ENSMUSG00000032403 | 127  | 0.12 | 0.15 | 0.08 | 0.2  | 0.08 | 0.09 |
| chr9 | 90008709  | 90009742  | Morf4l1       | ENSMUSG00000062270 | 433  | 0.2  | 0.21 | 0.16 | 0.2  | 0.3  | 0.23 |
| chr9 | 106355755 | 106356482 | Pcbp4         | ENSMUSG00000023495 | -70  | 0.22 | 0.43 | 0.13 | 0.21 | 0.26 | 0.13 |
| chr9 | 21875226  | 21875945  | Gm16845       | ENSMUSG00000087161 | 109  | 0.24 | 0.28 | 0.16 | 0.18 | 0.16 | 0.24 |
| chr9 | 53344643  | 53345749  | Atm           | ENSMUSG00000034218 | -483 | 0.09 | 0.5  | 0.15 | 0.15 | 0.16 | 0.2  |
| chr9 | 102910656 | 102911226 | Slco2a1       | ENSMUSG00000032548 | 124  | 0.09 | 0.17 | 0.2  | 0.18 | 0.12 | 0.24 |
| chr9 | 119248738 | 119249118 | Acaa1a        | ENSMUSG00000036138 | 134  | 0.12 | 0.16 | 0.05 | 0.09 | 0.15 | 0.12 |
| chr9 | 121186182 | 121187075 | Ulk4          | ENSMUSG00000040936 | -340 | 0.2  | 0.18 | 0.16 | 0.16 | 0.16 | 0.18 |
| chr9 | 45238319  | 45239660  | Dscaml1       | ENSMUSG00000032087 | 613  | 0.11 | 0.19 | 0.1  | 0.2  | 0.14 | 0.15 |
| chr9 | 55389543  | 55390702  | Isl2          | ENSMUSG00000032318 | -21  | 0.13 | 0.09 | 0.12 | 0.16 | 0.11 | 0.16 |
| chr9 | 63225441  | 63225767  | Map2k5        | ENSMUSG00000058444 | -112 | 0.09 | 0.07 | 0.08 | 0.11 | 0.07 | 0.12 |
| chr9 | 83728116  | 83728541  | Ttk           | ENSMUSG00000038379 | 32   | 0.12 | 0.16 | 0.22 | 0.07 | 0.09 | 0.13 |
| chr9 | 26541071  | 26541862  | B3gat1        | ENSMUSG00000045994 | 153  | 0.21 | 0.32 | 0.08 | 0.24 | 0.16 | 0.21 |
| chr9 | 35074867  | 35075577  | Fam118b       | ENSMUSG00000050471 | 130  | 0.22 | 0.08 | 0.2  | 0.24 | 0.1  | 0.16 |
| chr9 | 55174321  | 55174559  | Nrg4          | ENSMUSG00000032311 | 116  | 0.08 | 0.07 | 0.07 | 0.17 | 0.04 | 0.09 |
| chr9 | 99143616  | 99144123  | Cep70         | ENSMUSG00000056267 | -18  | 0.5  | 0.1  | 0.13 | 0.09 | 0.11 | 0.19 |
| chr9 | 103904754 | 103905563 | Nphp3         | ENSMUSG00000032558 | 284  | 0.11 | 0.09 | 0.07 | 0.1  | 0.1  | 0.14 |
| chr9 | 64880113  | 64880874  | Dpp8          | ENSMUSG00000032393 | 228  | 0.19 | 0.21 | 0.2  | 0.18 | 0.13 | 0.19 |
| chr9 | 107240452 | 107240773 | Hemk1         | ENSMUSG00000032579 | 20   | 0.21 | 0.09 | 0.12 | 0.12 | 0.14 | 0.16 |

|      |           |           |               |                    |      |      |      |      |      |      |      |
|------|-----------|-----------|---------------|--------------------|------|------|------|------|------|------|------|
| chr9 | 119311034 | 119312718 | Acvr2b        | ENSMUSG00000061393 | 314  | 0.28 | 0.3  | 0.13 | 0.13 | 0.23 | 0.18 |
| chr9 | 98463697  | 98464522  | 4930579K19Rik | ENSMUSG00000051074 | -79  | 0.33 | 0.5  | 0.11 | 0.17 | 0.11 | 0.17 |
| chr9 | 107853181 | 107853612 | Traip         | ENSMUSG00000032586 | 102  | 0.11 | 0.13 | 0.11 | 0.24 | 0.16 | 0.31 |
| chr9 | 6168469   | 6168869   | Pdghd         | ENSMUSG00000032006 | 57   | 0.5  | 0.38 | 0.24 | 0.12 | 0.11 | 0.13 |
| chr9 | 37296635  | 37297740  | BC024479      | ENSMUSG00000042138 | 281  | 0.13 | 0.13 | 0.11 | 0.19 | 0.12 | 0.13 |
| chr9 | 61761993  | 61762698  | Rplp1         | ENSMUSG00000007892 | 0    | 0.06 | 0.24 | 0.12 | 0.16 | 0.14 | 0.08 |
| chr9 | 112137651 | 112138134 | Arpp21        | ENSMUSG00000032503 | -370 | 0.1  | 0.09 | 0.1  | 0.1  | 0.13 | 0.1  |
| chr9 | 120019420 | 120020014 | Slc25a38      | ENSMUSG00000032519 | 225  | 0.13 | 0.18 | 0.12 | 0.21 | 0.1  | 0.18 |
| chr9 | 122859819 | 122860436 | 1110059G10Rik | ENSMUSG00000032551 | -56  | 0.1  | 0.06 | 0.1  | 0.15 | 0.04 | 0.09 |
| chr9 | 37228331  | 37228649  | Robo3         | ENSMUSG00000032128 | 1698 | 0.14 | 0.08 | 0.1  | 0.15 | 0.06 | 0.31 |
| chr9 | 90165152  | 90165446  | Tbc1d2b       | ENSMUSG00000037410 | 308  | 0.12 | 0.19 | 0.08 | 0.11 | 0.09 | 0.08 |
| chr9 | 107465548 | 107465862 | Tusc2         | ENSMUSG00000010054 | 119  | 0.12 | 0.11 | 0.07 | 0.09 | 0.1  | 0.2  |
| chr9 | 82723261  | 82723919  | Irak1bp1      | ENSMUSG00000032251 | 177  | 0.29 | 0.23 | 0.11 | 0.16 | 0.2  | 0.13 |
| chr9 | 121403398 | 121403818 | Cck           | ENSMUSG00000032532 | 1149 | 0.27 | NA   | 0.13 | 0.12 | 0.19 | 0.09 |
| chr9 | 21350796  | 21351920  | Carm1         | ENSMUSG00000032185 | 20   | 0.09 | 0.19 | 0.09 | 0.14 | 0.1  | 0.12 |
| chr9 | 106787400 | 106787606 | Rbm15b        | ENSMUSG00000045365 | 1828 | 0.4  | 0.5  | 0.16 | 0.22 | 0.26 | 0.29 |
| chr9 | 122832048 | 122832393 | Zfp105        | ENSMUSG00000057895 | 30   | 0.09 | 0.67 | 0.13 | 0.14 | 0.18 | 0.17 |
| chr9 | 108472125 | 108472791 | Dalrd3        | ENSMUSG00000019039 | 235  | 0.25 | 0.27 | 0.14 | 0.15 | 0.13 | 0.13 |
| chr9 | 110235767 | 110236241 | Scap          | ENSMUSG00000032485 | 212  | 0.15 | 0.09 | 0.09 | 0.11 | 0.13 | 0.09 |
| chr9 | 105297417 | 105297975 | Nek11         | ENSMUSG00000035032 | -108 | 0.26 | 0.68 | 0.12 | 0.23 | 0.2  | 0.14 |
| chr9 | 14080590  | 14081216  | Sesn3         | ENSMUSG00000032009 | 158  | 0.22 | 0.31 | 0.11 | 0.18 | 0.27 | 0.11 |
| chr9 | 20672977  | 20673421  | A230050P20Rik | ENSMUSG00000038884 | 113  | 0.25 | 0.18 | 0.1  | 0.21 | 0.21 | 0.16 |
| chr9 | 57492979  | 57493590  | Csk           | ENSMUSG00000032312 | 176  | 0.11 | 0.22 | 0.1  | 0.1  | 0.12 | 0.12 |
| chr9 | 31193590  | 31194221  | Nfrkb         | ENSMUSG00000042185 | 128  | 0.11 | 0.18 | 0.08 | 0.14 | 0.13 | 0.1  |
| chr9 | 48863518  | 48863938  | Zw10          | ENSMUSG00000032264 | -9   | 0.13 | 0.12 | 0.19 | 0.13 | 0.07 | 0.19 |
| chr9 | 66068425  | 66068673  | Dapk2         | ENSMUSG00000032380 | -5   | 0.98 | 0.88 | 0.85 | 0.97 | 0.92 | 0.98 |
| chr9 | 66793722  | 66794379  | Rps27l        | ENSMUSG00000036781 | 157  | 0.15 | 0.35 | 0.07 | 0.13 | 0.11 | 0.14 |
| chr9 | 86910199  | 86910806  | Ripply2       | ENSMUSG00000047897 | 130  | 0.15 | 0.33 | 0.13 | 0.18 | 0.12 | 0.14 |
| chr9 | 111173615 | 111174882 | Mlh1          | ENSMUSG00000032498 | -210 | 0.12 | 0.12 | 0.09 | 0.13 | 0.08 | 0.13 |
| chr9 | 118387598 | 118388604 | Eomes         | ENSMUSG00000032446 | 122  | 0.08 | 0.11 | 0.12 | 0.13 | 0.07 | 0.12 |

|      |           |           |           |                     |      |      |      |      |      |      |      |
|------|-----------|-----------|-----------|---------------------|------|------|------|------|------|------|------|
| chr9 | 120212765 | 120213673 | Myrip     | ENSMUSG000000041794 | 165  | 0.11 | 0.06 | 0.12 | 0.13 | 0.13 | 0.16 |
| chr9 | 20780348  | 20781304  | S1pr2     | ENSMUSG000000043895 | 411  | 0.14 | 0.13 | 0.09 | 0.12 | 0.11 | 0.11 |
| chr9 | 97011012  | 97011797  | Slc25a36  | ENSMUSG000000032449 | 2    | 0.33 | 0.16 | 0.11 | 0.28 | 0.22 | 0.12 |
| chr9 | 103663563 | 103664420 | Tmem108   | ENSMUSG000000042757 | 176  | 0.14 | 0.12 | 0.11 | 0.15 | 0.17 | 0.17 |
| chr9 | 107996521 | 107996976 | Apeh      | ENSMUSG000000032590 | 63   | 0.08 | 0.15 | 0.1  | 0.15 | 0.11 | 0.09 |
| chr9 | 21765982  | 21766321  | Epor      | ENSMUSG00000006235  | 1869 | 0.11 | 0.16 | 0.19 | 0.26 | 0.14 | 0.18 |
| chr9 | 110378975 | 110379266 | Klhl18    | ENSMUSG000000054792 | -26  | 0.15 | 0.27 | 0.13 | 0.16 | 0.13 | 0.1  |
| chr9 | 113617000 | 113617494 | Pdcd6ip   | ENSMUSG000000032504 | 103  | 0.08 | 0.07 | 0.11 | 0.06 | 0.05 | 0.08 |
| chr9 | 43047276  | 43048188  | Oaf       | ENSMUSG000000032014 | 167  | 0.09 | 0.12 | 0.13 | 0.11 | 0.12 | 0.13 |
| chr9 | 102619927 | 102621280 | Amotl2    | ENSMUSG000000032531 | 605  | 0.34 | 0.19 | 0.14 | 0.21 | 0.3  | 0.17 |
| chr9 | 53916002  | 53916311  | Tnfaip8l3 | ENSMUSG000000074345 | 62   | 0.5  | 0.21 | 0.14 | 0.2  | 0.15 | 0.17 |
| chr9 | 71063111  | 71064473  | Aldh1a2   | ENSMUSG000000013584 | 196  | 0.13 | 0.17 | 0.11 | 0.15 | 0.11 | 0.13 |
| chr9 | 110003427 | 110003638 | Dhx30     | ENSMUSG000000032480 | 59   | 0.25 | 0.12 | 0.09 | 0.14 | 0.06 | 0.21 |
| chr9 | 42924212  | 42924683  | Tmem136   | ENSMUSG000000048503 | 206  | 0.17 | 0.23 | 0.09 | 0.17 | 0.12 | 0.17 |
| chr9 | 35365819  | 35366303  | Ddx25     | ENSMUSG000000032101 | -6   | 0.17 | 0.23 | 0.1  | 0.15 | 0.2  | 0.13 |
| chr9 | 54546866  | 54547853  | Dnaja4    | ENSMUSG000000032285 | 38   | 0.14 | 0.17 | 0.11 | 0.17 | 0.15 | 0.13 |
| chr9 | 68501352  | 68502769  | Rora      | ENSMUSG000000032238 | 467  | 0.09 | 0.16 | 0.09 | 0.14 | 0.08 | 0.14 |
| chr9 | 96531129  | 96531993  | Rasa2     | ENSMUSG000000032413 | 394  | 0.12 | 0.14 | 0.11 | 0.11 | 0.13 | 0.12 |
| chr9 | 44151994  | 44152332  | Hmbs      | ENSMUSG000000032126 | 148  | 0.07 | 0.08 | 0.09 | 0.12 | 0.06 | 0.09 |
| chr9 | 66891337  | 66891865  | Tpm1      | ENSMUSG000000032366 | -85  | 0.38 | 0.35 | 0.06 | 0.13 | 0.53 | 0.15 |
| chr9 | 85220035  | 85221702  | Fam46a    | ENSMUSG000000032265 | -137 | 0.17 | 0.09 | 0.18 | 0.22 | 0.27 | 0.17 |
| chr9 | 108997596 | 108998490 | Plxnb1    | ENSMUSG000000053646 | 93   | 0.21 | 0.23 | 0.11 | 0.17 | 0.24 | 0.19 |
| chr9 | 56978540  | 56979125  | Man2c1    | ENSMUSG000000032295 | 257  | 0.17 | 0.29 | 0.1  | 0.16 | 0.22 | 0.18 |
| chr9 | 64129215  | 64129729  | Tipin     | ENSMUSG000000032397 | 58   | 0.07 | 0.05 | 0.11 | 0.16 | 0.14 | 0.13 |
| chr9 | 96264033  | 96265288  | Atp1b3    | ENSMUSG000000032412 | 58   | 0.11 | 0.15 | 0.11 | 0.16 | 0.1  | 0.15 |
| chr9 | 44225940  | 44226367  | Ccdc84    | ENSMUSG000000043923 | -63  | 0.15 | 0.17 | 0.08 | 0.18 | 0.18 | 0.15 |
| chr9 | 54407755  | 54407988  | Cib2      | ENSMUSG000000037493 | 154  | 0.22 | 0.13 | 0.09 | 0.14 | 0.17 | 0.17 |
| chr9 | 85642510  | 85642986  | Ibtk      | ENSMUSG000000035941 | 82   | 0.09 | 0.12 | 0.09 | 0.15 | 0.08 | 0.15 |
| chr9 | 108756384 | 108756997 | Slc26a6   | ENSMUSG000000023259 | 322  | 0.18 | 0.39 | 0.13 | 0.18 | 0.15 | 0.18 |
| chr9 | 118415257 | 118416299 | Golga4    | ENSMUSG000000038708 | 385  | 0.25 | 0.35 | 0.1  | 0.18 | 0.19 | 0.17 |

|      |           |           |               |                    |      |      |      |      |      |      |      |
|------|-----------|-----------|---------------|--------------------|------|------|------|------|------|------|------|
| chr9 | 57787739  | 57788830  | Sema7a        | ENSMUSG00000038264 | 364  | 0.07 | 0.13 | 0.07 | 0.09 | 0.08 | 0.12 |
| chr9 | 56775964  | 56776410  | Snx33         | ENSMUSG00000032733 | -9   | 0.09 | 0.1  | 0.12 | 0.17 | 0.1  | 0.14 |
| chr9 | 62384310  | 62384955  | Coro2b        | ENSMUSG00000041729 | 135  | 0.17 | 0.19 | 0.12 | 0.16 | 0.19 | 0.12 |
| chr9 | 99468715  | 99469412  | Armc8         | ENSMUSG00000032468 | 255  | 0.24 | 0.36 | 0.11 | 0.2  | 0.21 | 0.13 |
| chr9 | 21741442  | 21741759  | BC018242      | ENSMUSG00000040563 | 123  | 0.16 | 0.35 | 0.12 | 0.1  | 0.11 | 0.09 |
| chr9 | 34293676  | 34293921  | Kirrel3       | ENSMUSG00000032036 | 87   | 0.04 | 0.12 | 0.12 | 0.11 | 0.06 | 0.14 |
| chr9 | 53474858  | 53475729  | Cul5          | ENSMUSG00000032030 | -116 | 0.12 | 0.18 | 0.13 | 0.15 | 0.13 | 0.15 |
| chr9 | 65907776  | 65908301  | Ppib          | ENSMUSG00000032383 | 62   | 0.11 | 0.14 | 0.06 | 0.15 | 0.14 | 0.1  |
| chr9 | 21807091  | 21807454  | Ccdc151       | ENSMUSG00000039632 | -194 | 0.14 | 0.1  | 0.08 | 0.1  | 0.05 | 0.11 |
| chr9 | 35382047  | 35382248  | Gm6762        | ENSMUSG00000086984 | 101  | 0.33 | 0.57 | 0.2  | 0.11 | 0.12 | 0.15 |
| chr9 | 44134999  | 44135246  | Dpagt1        | ENSMUSG00000032123 | 194  | 0.15 | 0.19 | 0.11 | 0.18 | 0.22 | 0.21 |
| chr9 | 45762763  | 45763463  | Sidt2         | ENSMUSG00000034908 | -53  | 0.08 | 0.13 | 0.09 | 0.13 | 0.07 | 0.07 |
| chr9 | 102528105 | 102528978 | Cep63         | ENSMUSG00000032534 | -188 | 0.1  | 0.15 | 0.12 | 0.16 | 0.11 | 0.12 |
| chr9 | 107302613 | 107302827 | Cacna2d2      | ENSMUSG00000010066 | 320  | 0.1  | 0.07 | 0.1  | 0.18 | 0.06 | 0.1  |
| chr9 | 13553549  | 13554018  | Mttr2         | ENSMUSG00000031918 | 222  | 0.13 | 0.13 | 0.1  | 0.1  | 0.11 | 0.15 |
| chr9 | 107429484 | 107429703 | Cacna2d2      | ENSMUSG00000010066 | 605  | 0.22 | NA   | 0.28 | 0.21 | 0.27 | 0.51 |
| chr9 | 57385264  | 57385617  | 2310046O06Rik | ENSMUSG00000032305 | 105  | 0.55 | 0.59 | 0.21 | 0.22 | 0.51 | 0.12 |
| chr9 | 110034127 | 110035028 | Smarcc1       | ENSMUSG00000032481 | 36   | 0.11 | 0.08 | 0.11 | 0.12 | 0.12 | 0.16 |
| chr9 | 74709447  | 74711693  | Onecut1       | ENSMUSG00000043013 | 842  | 0.17 | 0.29 | 0.11 | 0.21 | 0.2  | 0.15 |
| chr9 | 61874307  | 61874791  | Paqr5         | ENSMUSG00000032278 | 59   | 0.2  | 0.13 | 0.1  | 0.18 | 0.07 | 0.1  |
| chr9 | 90057920  | 90058809  | Adams7        | ENSMUSG00000032363 | 402  | 0.16 | 0.11 | 0.14 | 0.1  | 0.11 | 0.23 |
| chr9 | 95855070  | 95855512  | Xrn1          | ENSMUSG00000032410 | 112  | 0.09 | 0.22 | 0.14 | 0.11 | 0.25 | 0.16 |
| chr9 | 107790308 | 107790624 | Mon1a         | ENSMUSG00000032583 | 6    | 0.13 | 0.17 | 0.1  | 0.14 | 0.16 | 0.12 |
| chr9 | 110540902 | 110541134 | Nbeal2        | ENSMUSG00000056724 | 103  | 0.61 | 0.71 | 0.22 | 0.31 | 0.62 | 0.34 |
| chr9 | 111592491 | 111592989 | Stac          | ENSMUSG00000032502 | -11  | 0.13 | 0.12 | 0.07 | 0.16 | 0.1  | 0.07 |
| chr9 | 21766967  | 21767187  | Epor          | ENSMUSG00000006235 | 943  | 0.14 | NA   | 0.11 | NA   | 0.2  | 0.27 |
| chr9 | 44215218  | 44216017  | Trappc4       | ENSMUSG00000032112 | -202 | 0.19 | 0.3  | 0.14 | 0.29 | 0.16 | 0.23 |
| chr9 | 56008204  | 56008950  | Tspan3        | ENSMUSG00000032324 | 19   | 0.06 | 0.06 | 0.09 | 0.07 | 0.07 | 0.07 |
| chr9 | 61969658  | 61970593  | Mir5133       | ENSMUSG00000092696 | 276  | 0.07 | 0.23 | 0.14 | 0.17 | 0.1  | 0.1  |
| chr9 | 108242148 | 108242420 | Gpx1          | ENSMUSG00000063856 | 677  | 0.44 | NA   | 0.29 | 0.15 | 0.36 | 0.2  |

|      |           |           |          |                    |      |      |      |      |      |      |      |
|------|-----------|-----------|----------|--------------------|------|------|------|------|------|------|------|
| chr9 | 8134104   | 8134575   | AK129341 | ENSMUSG00000040729 | -45  | 0.13 | 0.21 | 0.09 | 0.12 | 0.11 | 0.08 |
| chr9 | 45714429  | 45715338  | Rnf214   | ENSMUSG00000042790 | -427 | 0.11 | 0.13 | 0.15 | 0.15 | 0.12 | 0.14 |
| chr9 | 59387343  | 59387849  | Hexa     | ENSMUSG00000025232 | 122  | 0.12 | 0.1  | 0.09 | 0.14 | 0.11 | 0.14 |
| chr9 | 75079755  | 75080144  | Myo5c    | ENSMUSG00000033590 | 128  | 0.16 | 0.17 | 0.18 | 0.2  | 0.15 | 0.23 |
| chr9 | 92436831  | 92437605  | Plod2    | ENSMUSG00000032374 | 157  | 0.11 | 0.13 | 0.08 | 0.1  | 0.1  | 0.1  |
| chr9 | 108362835 | 108363265 | Ccdc71   | ENSMUSG00000049305 | 201  | 0.18 | 0.14 | 0.09 | 0.16 | 0.21 | 0.13 |
| chr9 | 44041869  | 44042095  | Cbl      | ENSMUSG00000034342 | 147  | 0.44 | 0.14 | 0.24 | 0.15 | 0.54 | 0.17 |
| chr9 | 95745434  | 95745746  | Pls1     | ENSMUSG00000049493 | 115  | 0.08 | 0.11 | 0.12 | 0.24 | 0.06 | 0.09 |
| chr9 | 110556176 | 110556811 | Nbeal2   | ENSMUSG00000056724 | 153  | 0.06 | 0.08 | 0.1  | 0.13 | 0.07 | 0.1  |
| chr9 | 44516504  | 44516735  | Phldb1   | ENSMUSG00000048537 | -109 | 0.23 | 0.19 | 0.18 | 0.24 | 0.17 | 0.3  |
| chr9 | 55359549  | 55360263  | Etfa     | ENSMUSG00000032314 | -291 | 0.14 | 0.16 | 0.13 | 0.13 | 0.13 | 0.16 |
| chr9 | 77392209  | 77393136  | Lrrc1    | ENSMUSG00000032352 | 5    | 0.17 | 0.19 | 0.16 | 0.16 | 0.2  | 0.15 |
| chr9 | 118058985 | 118059474 | Cmc1     | ENSMUSG00000039163 | -31  | 0.11 | 0.13 | 0.1  | 0.17 | 0.11 | 0.11 |
| chr9 | 122260561 | 122261305 | Abhd5    | ENSMUSG00000032540 | 207  | 0.11 | 0.08 | 0.08 | 0.14 | 0.1  | 0.11 |
| chr9 | 21420720  | 21421099  | Smarca4  | ENSMUSG00000032187 | 201  | 0.2  | 0.09 | 0.09 | 0.19 | 0.15 | 0.09 |
| chr9 | 44541766  | 44542619  | Phldb1   | ENSMUSG00000048537 | 1085 | 0.13 | 0.12 | 0.1  | 0.18 | 0.14 | 0.19 |
| chr9 | 70504427  | 70505261  | Fam63b   | ENSMUSG00000042444 | 137  | 0.2  | 0.13 | 0.09 | 0.11 | 0.14 | 0.12 |
| chr9 | 100979037 | 100979324 | Msl2     | ENSMUSG00000066415 | 729  | 0.07 | 0.13 | 0.12 | 0.18 | 0.03 | 0.09 |
| chr9 | 114597585 | 114598495 | Dync1li1 | ENSMUSG00000032435 | 132  | 0.12 | 0.13 | 0.12 | 0.16 | 0.13 | 0.11 |
| chr9 | 21722267  | 21722759  | Rab3d    | ENSMUSG00000019066 | 20   | 0.38 | 0.67 | 0.12 | 0.29 | 0.5  | 0.2  |
| chr9 | 65427675  | 65428088  | Plekho2  | ENSMUSG00000050721 | -34  | 0.09 | 0.12 | 0.12 | 0.13 | 0.08 | 0.11 |
| chr9 | 103013983 | 103014957 | Rab6b    | ENSMUSG00000032549 | 66   | 0.08 | 0.14 | 0.12 | 0.11 | 0.08 | 0.14 |
| chr9 | 14304700  | 14305376  | Kdm4d    | ENSMUSG00000053914 | -194 | 0.33 | 0.26 | 0.14 | 0.17 | 0.31 | 0.13 |
| chr9 | 22193257  | 22193921  | Anln     | ENSMUSG00000036777 | 61   | 0.06 | 0.14 | 0.09 | 0.15 | 0.07 | 0.1  |
| chr9 | 58883515  | 58884988  | Neo1     | ENSMUSG00000032340 | -3   | 0.13 | 0.1  | 0.09 | 0.12 | 0.14 | 0.15 |
| chr9 | 75458539  | 75459153  | Tmod2    | ENSMUSG00000032186 | 286  | 0.09 | 0.22 | 0.09 | 0.17 | 0.09 | 0.11 |
| chr9 | 106367069 | 106368065 | Gpr62    | ENSMUSG00000091735 | 704  | 0.08 | 0.1  | 0.1  | 0.17 | 0.08 | 0.19 |
| chr9 | 20530889  | 20531519  | Olfm2    | ENSMUSG00000032172 | 1469 | 0.3  | 0.21 | 0.13 | 0.27 | 0.29 | 0.15 |
| chr9 | 22064000  | 22064304  | Zfp599   | ENSMUSG00000062794 | 187  | 0.13 | 0.07 | 0.06 | 0.17 | 0.15 | 0.11 |
| chr9 | 35089143  | 35089350  | Gm5614   | ENSMUSG00000066771 | 174  | 0.89 | 0.75 | 0.74 | 0.65 | 0.9  | 0.94 |

|      |           |           |               |                    |       |      |      |      |      |      |      |
|------|-----------|-----------|---------------|--------------------|-------|------|------|------|------|------|------|
| chr9 | 36953187  | 36953412  | Pknox2        | ENSMUSG00000035934 | 1552  | 0.33 | 0.45 | 0.13 | 0.64 | 0.43 | 0.22 |
| chr9 | 65193826  | 65194901  | Pdcd7         | ENSMUSG00000041837 | 488   | 0.19 | 0.27 | 0.16 | 0.16 | 0.2  | 0.2  |
| chr9 | 78328665  | 78329977  | Eef1a1        | ENSMUSG00000037742 | 210   | 0.09 | 0.14 | 0.08 | 0.18 | 0.1  | 0.15 |
| chr9 | 31088139  | 31088963  | Prdm10        | ENSMUSG00000042496 | 428   | 0.18 | 0.17 | 0.14 | 0.14 | 0.18 | 0.13 |
| chr9 | 74696138  | 74697419  | Gm16551       | ENSMUSG00000066477 | 534   | 0.14 | 0.31 | 0.14 | 0.2  | 0.15 | 0.13 |
| chr9 | 100471167 | 100471589 | Tmem22        | ENSMUSG00000070287 | 126   | 0.2  | 0.69 | 1    | 0.88 | 0.14 | 0.11 |
| chr9 | 81525282  | 81527144  | D430036J16Rik | ENSMUSG00000085832 | 676   | 0.12 | 0.12 | 0.12 | 0.28 | 0.11 | 0.14 |
| chr9 | 14185091  | 14185625  | Endod1        | ENSMUSG00000037419 | 328   | 0.08 | 0.08 | 0.08 | 0.1  | 0.08 | 0.08 |
| chr9 | 20837513  | 20838208  | Gm20603       | ENSMUSG00000091118 | -1059 | 0.22 | 0.33 | 0.1  | 0.18 | 0.17 | 0.23 |
| chr9 | 20877533  | 20878025  | Fdx11         | ENSMUSG00000079677 | 179   | 0.17 | 0.43 | 0.1  | 0.2  | 0.11 | 0.16 |
| chr9 | 20896108  | 20896571  | 1700084C06Rik | ENSMUSG00000086016 | 140   | 0.12 | 0.19 | 0.1  | 0.19 | 0.12 | 0.13 |
| chr9 | 20954149  | 20954501  | Cdc37         | ENSMUSG00000019471 | 25    | 0.12 | 0.15 | 0.12 | 0.33 | 0.09 | 0.11 |
| chr9 | 21171892  | 21172954  | Ilf3          | ENSMUSG00000032178 | 36    | 0.07 | 0.17 | 0.13 | 0.31 | 0.08 | 0.22 |
| chr9 | 21527793  | 21528394  | Gm16961       | ENSMUSG00000086570 | -199  | 0.17 | 0.07 | 0.16 | 0.12 | 0.12 | 0.26 |
| chr9 | 21792506  | 21792724  | Rgl3          | ENSMUSG00000040146 | 1282  | 0.06 | 0.1  | 0.08 | 0.17 | 0.1  | 0.12 |
| chr9 | 22030210  | 22030474  | Zfp809        | ENSMUSG00000057982 | 68    | 0.2  | 0.12 | 0.08 | 0.11 | 0.15 | 0.15 |
| chr9 | 26563234  | 26563655  | B3gat1        | ENSMUSG00000045994 | 575   | 1    | NA   | 1    | NA   | 1    | NA   |
| chr9 | 30750105  | 30750929  | Adamts8       | ENSMUSG00000031994 | 370   | 0.12 | 0.08 | 0.12 | 0.09 | 0.11 | 0.09 |
| chr9 | 31018661  | 31019692  | Aplp2         | ENSMUSG00000031996 | 220   | 0.29 | 0.49 | 0.13 | 0.17 | 0.29 | 0.18 |
| chr9 | 36533857  | 36534316  | Chek1         | ENSMUSG00000032113 | -127  | 0.14 | 0.14 | 0.09 | 0.21 | 0.12 | 0.21 |
| chr9 | 36952784  | 36953026  | Pknox2        | ENSMUSG00000035934 | 1946  | 0.14 | 0.08 | 0.12 | 0.2  | 0.14 | 0.12 |
| chr9 | 37240578  | 37240942  | Robo3         | ENSMUSG00000032128 | -12   | 0.09 | 0.12 | 0.06 | 0.17 | 0.09 | 0.19 |
| chr9 | 39999874  | 40000337  | Zfp202        | ENSMUSG00000025602 | 204   | 0.25 | 0.2  | 0.13 | 0.11 | 0.27 | 0.12 |
| chr9 | 40076870  | 40077238  | Scn3b         | ENSMUSG00000049281 | 40    | 0.12 | 0.14 | 0.09 | 0.22 | 0.17 | 0.19 |
| chr9 | 40772001  | 40772314  | 4931429I11Rik | ENSMUSG00000032023 | 44    | 0.05 | 0.39 | 0.07 | 0.09 | 0.05 | 0.12 |
| chr9 | 42072161  | 42072591  | Sc5d          | ENSMUSG00000032018 | -93   | 0.07 | 0.19 | 0.08 | 0.17 | 0.08 | 0.14 |
| chr9 | 43851571  | 43851784  | Thy1          | ENSMUSG00000032011 | 210   | 1    | NA   | 0.16 | 0.23 | 1    | 0.11 |
| chr9 | 44169423  | 44169913  | Vps11         | ENSMUSG00000032127 | 85    | 0.11 | 0.19 | 0.12 | 0.14 | 0.1  | 0.26 |
| chr9 | 44306521  | 44307261  | Bcl9l         | ENSMUSG00000063382 | -328  | 0.15 | 0.71 | 0.14 | 0.18 | 0.17 | 0.12 |
| chr9 | 44529265  | 44529522  | Phldb1        | ENSMUSG00000048537 | 77    | 0.08 | 0.11 | 0.07 | 0.1  | 0.08 | 0.1  |



|      |          |          |         |                    |      |      |      |      |      |      |      |
|------|----------|----------|---------|--------------------|------|------|------|------|------|------|------|
| chr9 | 44946398 | 44947069 | Scr4b   | ENSMUSG00000046480 | 213  | 0.12 | 0.16 | 0.12 | 0.14 | 0.12 | 0.11 |
| chr9 | 45646737 | 45647024 | Bace1   | ENSMUSG00000032086 | 217  | 0.22 | 0.12 | 0.14 | 0.28 | 0.2  | 0.08 |
| chr9 | 46091017 | 46091382 | Bud13   | ENSMUSG00000032077 | 108  | 0.07 | 0.05 | 0.12 | 0.13 | 0.08 | 0.06 |
| chr9 | 48288448 | 48288818 | Rexo2   | ENSMUSG00000032026 | 83   | 0.09 | 0.09 | 0.09 | 0.06 | 0.09 | 0.12 |
| chr9 | 51771176 | 51771743 | Fdx1    | ENSMUSG00000032051 | 192  | 0.09 | 0.2  | 0.09 | 0.14 | 0.07 | 0.09 |
| chr9 | 53192052 | 53192684 | Kdelc2  | ENSMUSG00000034487 | 240  | 0.07 | 0.09 | 0.08 | 0.09 | 0.08 | 0.15 |
| chr9 | 54134191 | 54134725 | Gldn    | ENSMUSG00000046167 | 165  | 0.09 | 0.07 | 0.15 | 0.14 | 0.11 | 0.25 |
| chr9 | 54798567 | 54799080 | Psma4   | ENSMUSG00000032301 | 226  | 0.23 | 0.21 | 0.13 | 0.22 | 0.23 | 0.16 |
| chr9 | 54874023 | 54874469 | Chrna3  | ENSMUSG00000032303 | 120  | 0.14 | 0.27 | 0.11 | 0.16 | 0.2  | 0.18 |
| chr9 | 57315801 | 57316038 | Scamp5  | ENSMUSG00000040722 | -88  | 0.09 | NA   | 0.08 | 0.12 | 0.1  | 0.2  |
| chr9 | 57408690 | 57409008 | Scamp2  | ENSMUSG00000040188 | 98   | 0.12 | 0.14 | 0.12 | 0.19 | 0.07 | 0.29 |
| chr9 | 57684321 | 57684873 | Arid3b  | ENSMUSG0000004661  | -84  | 0.25 | 0.21 | 0.11 | 0.13 | 0.14 | 0.14 |
| chr9 | 58100872 | 58101229 | Stoml1  | ENSMUSG00000032333 | 79   | 0.13 | 0.21 | 0.1  | 0.25 | 0.1  | 0.19 |
| chr9 | 59201006 | 59201290 | Bbs4    | ENSMUSG00000025235 | 167  | 0.42 | 0.45 | 0.21 | 0.44 | 0.41 | 0.29 |
| chr9 | 59425681 | 59426453 | Cellf6  | ENSMUSG00000032297 | 343  | 0.06 | 0.57 | 0.08 | 0.11 | 0.04 | 0.24 |
| chr9 | 60369568 | 60369935 | Thsd4   | ENSMUSG00000032289 | 102  | 0.08 | 0.08 | 0.06 | 0.1  | 0.07 | 0.07 |
| chr9 | 60560830 | 60561264 | Larp6   | ENSMUSG00000034839 | 251  | 0.07 | 0.05 | 0.08 | 0.11 | 0.07 | 0.11 |
| chr9 | 61220059 | 61222125 | Tle3    | ENSMUSG00000032280 | 902  | 0.23 | 0.29 | 0.13 | 0.18 | 0.22 | 0.15 |
| chr9 | 62129872 | 62130100 | Spesp1  | ENSMUSG00000046846 | 0    | 0.83 | 0.87 | 0.79 | 0.87 | 0.83 | 0.87 |
| chr9 | 64027057 | 64027361 | Snapc5  | ENSMUSG00000032398 | 105  | 0.25 | 0.33 | 0.1  | 0.21 | 0.14 | 0.15 |
| chr9 | 64585107 | 64585624 | Rab11a  | ENSMUSG0000004771  | 65   | 0.25 | 0.23 | 0.13 | 0.15 | 0.14 | 0.17 |
| chr9 | 64868867 | 64869624 | Ptplad1 | ENSMUSG00000033629 | 279  | 0.08 | 0.1  | 0.08 | 0.12 | 0.08 | 0.15 |
| chr9 | 65283502 | 65283900 | Mtfmt   | ENSMUSG00000059183 | 112  | 0.11 | 0.24 | 0.11 | 0.14 | 0.11 | 0.12 |
| chr9 | 65308674 | 65309149 | Spg21   | ENSMUSG00000032388 | 167  | 1    | 1    | 0.1  | 0.13 | 1    | 0.23 |
| chr9 | 65757081 | 65757603 | Csnk1g1 | ENSMUSG00000032384 | 96   | 0.18 | 0.13 | 0.09 | 0.11 | 0.33 | 0.16 |
| chr9 | 66005884 | 66006257 | Dapk2   | ENSMUSG00000032380 | 40   | 0.08 | 0.06 | 0.09 | 0.11 | 0.09 | 0.14 |
| chr9 | 69837168 | 69837758 | Bnip2   | ENSMUSG00000011958 | 190  | 0.12 | 0.16 | 0.11 | 0.16 | 0.12 | 0.13 |
| chr9 | 72654809 | 72655701 | Prtg    | ENSMUSG00000036030 | 174  | 0.11 | 0.25 | 0.09 | 0.13 | 0.11 | 0.12 |
| chr9 | 72833011 | 72833900 | Gm5918  | ENSMUSG00000086158 | -272 | 0.2  | 0.39 | 0.1  | 0.19 | 0.18 | 0.15 |
| chr9 | 72951048 | 72951727 | Gm20509 | ENSMUSG00000092310 | -149 | 0.2  | 0.16 | 0.14 | 0.19 | 0.14 | 0.2  |

|      |           |           |               |                    |      |      |      |      |      |      |      |
|------|-----------|-----------|---------------|--------------------|------|------|------|------|------|------|------|
| chr9 | 75289121  | 75289790  | Leo1          | ENSMUSG00000042487 | 124  | 0.07 | 0.11 | 0.1  | 0.13 | 0.06 | 0.14 |
| chr9 | 75406937  | 75407491  | Tmod3         | ENSMUSG00000058587 | 250  | 0.15 | 0.13 | 0.12 | 0.16 | 0.14 | 0.11 |
| chr9 | 79567320  | 79567626  | Col12a1       | ENSMUSG00000032332 | -835 | 0.24 | 0.15 | 0.13 | 0.24 | 0.25 | 0.14 |
| chr9 | 82868682  | 82869423  | Phip          | ENSMUSG00000032253 | -59  | 0.25 | 0.38 | 0.11 | 0.12 | 0.26 | 0.17 |
| chr9 | 86589414  | 86590078  | A330041J22Rik | ENSMUSG00000087466 | 171  | 0.07 | 0.14 | 0.1  | 0.15 | 0.08 | 0.11 |
| chr9 | 86916777  | 86917190  | Cyb5r4        | ENSMUSG00000032872 | 134  | 0.19 | 0.23 | 0.16 | 0.14 | 0.16 | 0.19 |
| chr9 | 88417715  | 88418267  | Snhg5         | ENSMUSG00000032424 | -270 | 0.1  | 0.1  | 0.1  | 0.08 | 0.1  | 0.18 |
| chr9 | 88753714  | 88753993  | Gm17694       | ENSMUSG00000090543 | 4    | 0.12 | 0.26 | 0.1  | 0.09 | 0.14 | 0.08 |
| chr9 | 99476148  | 99476619  | Dbr1          | ENSMUSG00000032469 | 165  | 0.12 | 0.14 | 0.1  | 0.17 | 0.13 | 0.15 |
| chr9 | 102408223 | 102408802 | Ky            | ENSMUSG00000035606 | 44   | 0.07 | 0.15 | 0.08 | 0.18 | 0.07 | 0.12 |
| chr9 | 103207237 | 103207947 | 1300017J02Rik | ENSMUSG00000033688 | -180 | 0.11 | 0.13 | 0.09 | 0.17 | 0.11 | 0.17 |
| chr9 | 106149927 | 106150514 | Alas1         | ENSMUSG00000032786 | -159 | 0.17 | 0.16 | 0.12 | 0.13 | 0.17 | 0.18 |
| chr9 | 106379393 | 106379795 | Rrp9          | ENSMUSG00000041506 | -6   | 0.09 | 0.21 | 0.1  | 0.15 | 0.09 | 0.19 |
| chr9 | 106724098 | 106724951 | Vprbp         | ENSMUSG00000040325 | 319  | 0.29 | 0.46 | 0.15 | 0.16 | 0.23 | 0.18 |
| chr9 | 106787962 | 106789808 | Rbm15b        | ENSMUSG00000045365 | 446  | 0.09 | 0.14 | 0.1  | 0.14 | 0.09 | 0.13 |
| chr9 | 107095857 | 107096237 | AA543401      | ENSMUSG00000092125 | 923  | 1    | 0.96 | 0.93 | 0.97 | 1    | 0.97 |
| chr9 | 107198877 | 107199332 | Cish          | ENSMUSG00000032578 | 63   | 0.09 | 0.1  | 0.1  | 0.2  | 0.1  | 0.13 |
| chr9 | 107437286 | 107437607 | Tmem115       | ENSMUSG00000010045 | 1170 | 0.17 | 0.08 | 0.14 | 0.13 | 0.16 | 0.17 |
| chr9 | 107537453 | 107537684 | Gnai2         | ENSMUSG00000032562 | 87   | 0.15 | NA   | 0.07 | 0.09 | 0.15 | 0.13 |
| chr9 | 107774675 | 107775194 | Rbm6          | ENSMUSG00000032582 | 160  | 0.13 | 0.1  | 0.12 | 0.11 | 0.13 | 0.16 |
| chr9 | 107904629 | 107905519 | 4930535L15Rik | ENSMUSG00000093619 | -339 | 0.1  | 0.15 | 0.11 | 0.14 | 0.09 | 0.11 |
| chr9 | 108354624 | 108355020 | Klhdc8b       | ENSMUSG00000032609 | -114 | 0.12 | 0.5  | 0.13 | 0.22 | 0.11 | 0.17 |
| chr9 | 108564406 | 108564766 | Slc25a20      | ENSMUSG00000032602 | 157  | 0.33 | 0.3  | 0.22 | 0.12 | 1    | 0.27 |
| chr9 | 108594306 | 108595338 | Prkar2a       | ENSMUSG00000032601 | 348  | 0.08 | 0.16 | 0.1  | 0.13 | 0.08 | 0.1  |
| chr9 | 110019472 | 110020324 | Dhx30         | ENSMUSG00000032480 | -307 | 0.12 | 0.23 | 0.11 | 0.13 | 0.11 | 0.1  |
| chr9 | 110147509 | 110148343 | Cspg5         | ENSMUSG00000032482 | 1639 | 0.18 | 0.14 | 0.08 | 0.12 | 0.15 | 0.08 |
| chr9 | 114690343 | 114691166 | Cmtm7         | ENSMUSG00000032436 | 193  | 0.08 | 0.12 | 0.12 | 0.13 | 0.07 | 0.14 |
| chr9 | 116083783 | 116084557 | Tgfbr2        | ENSMUSG00000032440 | 213  | 0.11 | 0.14 | 0.08 | 0.12 | 0.11 | 0.12 |
| chr9 | 119011774 | 119012086 | Dlec1         | ENSMUSG00000038060 | 303  | 0.1  | 0.15 | 0.08 | 0.14 | 0.14 | 0.17 |
| chr9 | 119266572 | 119267029 | Xylb          | ENSMUSG00000035769 | 94   | 0.53 | 0.67 | 0.15 | 0.3  | 0.5  | 0.17 |

|      |           |           |               |                    |       |      |      |      |      |      |      |
|------|-----------|-----------|---------------|--------------------|-------|------|------|------|------|------|------|
| chr9 | 119487592 | 119488467 | Scr5a         | ENSMUSG00000032511 | 105   | 0.11 | 0.15 | 0.09 | 0.1  | 0.11 | 0.14 |
| chr9 | 122795943 | 122796292 | Zfp167        | ENSMUSG00000063488 | -1472 | 0.2  | 0.12 | 0.1  | 0.09 | 0.23 | 0.08 |
| chr9 | 123760612 | 123761280 | Fyco1         | ENSMUSG00000025241 | -164  | 0.2  | 0.27 | 0.14 | 0.17 | 0.18 | 0.16 |
| chr9 | 7176711   | 7177070   | Dync2h1       | ENSMUSG00000047193 | 67    | NA   | 0.1  | 0.14 | 0.11 | 0.54 | 0.21 |
| chr9 | 7763787   | 7764494   | Tmem123       | ENSMUSG00000050912 | 99    | NA   | NA   | 0.15 | NA   | NA   | 0.22 |
| chr9 | 7872571   | 7872824   | Birc3         | ENSMUSG00000032000 | 160   | NA   | NA   | 0.14 | 0.56 | 0.2  | 0.18 |
| chr9 | 8543990   | 8544648   | Trpc6         | ENSMUSG00000031997 | -113  | NA   | 0.07 | 0.11 | 0.07 | 0.09 | 0.14 |
| chr9 | 8900492   | 8900717   | Pgr           | ENSMUSG00000031870 | 136   | NA   | NA   | 0.1  | 0.24 | NA   | 0.08 |
| chr9 | 14418741  | 14419421  | Amotl1        | ENSMUSG00000013076 | -51   | NA   | 0.37 | 0.14 | 0.16 | 0.13 | 0.18 |
| chr9 | 15432306  | 15432556  | Ccdc67        | ENSMUSG00000039977 | -84   | NA   | 1    | 1    | NA   | 0.8  | NA   |
| chr9 | 20385713  | 20386129  | Zfp846        | ENSMUSG00000058192 | 152   | NA   | 0.33 | 0.25 | 0.38 | 0.5  | 0.3  |
| chr9 | 20411670  | 20412122  | 5730577103Rik | ENSMUSG00000062470 | -23   | 0.43 | 0.35 | 0.07 | 0.09 | NA   | 0.08 |
| chr9 | 20682471  | 20683043  | Angptl6       | ENSMUSG00000038742 | 1414  | NA   | 0.21 | 0.09 | 0.15 | NA   | 0.24 |
| chr9 | 20841185  | 20841549  | Gm17470       | ENSMUSG00000091919 | 859   | 0.23 | 0.49 | 0.17 | 0.28 | NA   | 0.1  |
| chr9 | 20842054  | 20842298  | Gm17470       | ENSMUSG00000091919 | 50    | 0.06 | 0.11 | 0.11 | 0.07 | NA   | 0.08 |
| chr9 | 21092116  | 21092765  | Kri1          | ENSMUSG00000035047 | -25   | NA   | 1    | NA   | NA   | NA   | 1    |
| chr9 | 21216636  | 21216918  | Qtrt1         | ENSMUSG0000002825  | 496   | 0.12 | 0.08 | 0.1  | 0.09 | NA   | 0.18 |
| chr9 | 21564394  | 21565100  | Spc24         | ENSMUSG00000074476 | -17   | NA   | 1    | 0.87 | 1    | 1    | 1    |
| chr9 | 21760175  | 21760670  | 2310047B19Rik | ENSMUSG00000051238 | 225   | NA   | NA   | 0.06 | 0.11 | NA   | 0.42 |
| chr9 | 21889745  | 21890140  | Ecsit         | ENSMUSG00000066839 | -123  | NA   | 0.08 | 0.1  | 0.14 | 0.09 | 0.14 |
| chr9 | 24500392  | 24500804  | Dpy19l2       | ENSMUSG00000085576 | 139   | NA   | NA   | NA   | 0.5  | NA   | NA   |
| chr9 | 24578553  | 24578963  | Tbx20         | ENSMUSG00000031965 | -12   | NA   | 0.33 | 0.1  | 0.16 | 1    | 0.1  |
| chr9 | 33535801  | 33536005  | Gm10698       | ENSMUSG00000079884 | 72    | NA   | NA   | 0.78 | 1    | NA   | 0.73 |
| chr9 | 34924149  | 34924541  | 4930581F22Rik | ENSMUSG00000070315 | 32    | NA   | 0.29 | 0.14 | 0.12 | 0.38 | 0.11 |
| chr9 | 36575064  | 36575590  | Stt3a         | ENSMUSG00000032116 | -169  | NA   | 0.11 | 0.1  | 0.09 | 1    | 0.19 |
| chr9 | 37062826  | 37063113  | Slc37a2       | ENSMUSG00000032122 | 30    | NA   | 0.2  | 0.44 | 0.33 | 0.23 | 0.28 |
| chr9 | 37237147  | 37237367  | Robo3         | ENSMUSG00000032128 | 462   | NA   | NA   | NA   | 1    | 1    | 1    |
| chr9 | 37337910  | 37338175  | Esam          | ENSMUSG0000001946  | 207   | NA   | 0.5  | 0.06 | 0.5  | NA   | 0.2  |
| chr9 | 40338770  | 40339046  | Gramd1b       | ENSMUSG00000040111 | 60    | NA   | NA   | 0.12 | 1    | NA   | 0.1  |
| chr9 | 43013571  | 43013946  | Pou2f3        | ENSMUSG00000032015 | 8     | NA   | 0.86 | 0.11 | 0.16 | NA   | 0.32 |

|      |          |          |               |                    |      |      |      |      |      |      |      |
|------|----------|----------|---------------|--------------------|------|------|------|------|------|------|------|
| chr9 | 43553341 | 43553712 | Pvrl1         | ENSMUSG00000032012 | 867  | NA   | 0.18 | 0.09 | 0.12 | 0.27 | 0.15 |
| chr9 | 44205016 | 44205534 | Slc37a4       | ENSMUSG00000032114 | 93   | NA   | 0.14 | 0.16 | 1    | 0.11 | 0.21 |
| chr9 | 44542978 | 44543273 | Phldb1        | ENSMUSG00000048537 | 152  | NA   | NA   | 0.36 | 0.15 | NA   | 0.25 |
| chr9 | 45077041 | 45077321 | Il10ra        | ENSMUSG00000032089 | 48   | NA   | NA   | 0.29 | NA   | NA   | 0.2  |
| chr9 | 45178282 | 45178566 | Fxyd6         | ENSMUSG00000066705 | 156  | NA   | NA   | 0.14 | 0.11 | 0.37 | 0.12 |
| chr9 | 46078189 | 46078499 | Apoa5         | ENSMUSG00000032079 | 1183 | NA   | NA   | 1    | NA   | NA   | NA   |
| chr9 | 50369235 | 50369497 | Tex12         | ENSMUSG00000032065 | 7    | 1    | NA   | NA   | NA   | NA   | NA   |
| chr9 | 50467323 | 50467967 | Dlat          | ENSMUSG00000000168 | 240  | NA   | 0.25 | 0.12 | 0.28 | 0.13 | 0.11 |
| chr9 | 53418193 | 53418559 | Acat1         | ENSMUSG00000032047 | 59   | NA   | NA   | 0.06 | 0.07 | NA   | 0.11 |
| chr9 | 54765044 | 54765266 | Agphd1        | ENSMUSG00000035878 | 65   | NA   | 0.25 | 0.08 | 0.14 | NA   | 0.13 |
| chr9 | 54829137 | 54829422 | Chrna5        | ENSMUSG00000035594 | 6    | NA   | 0.92 | 0.08 | 0.2  | NA   | 0.16 |
| chr9 | 56785240 | 56785768 | Imp3          | ENSMUSG00000032288 | 197  | NA   | 1    | 0.07 | 0.06 | 0.69 | 0.17 |
| chr9 | 56798412 | 56798760 | Snupn         | ENSMUSG00000055334 | -99  | 0.25 | 0.08 | 0.2  | 0.1  | NA   | 0.17 |
| chr9 | 57400338 | 57400606 | Mpi           | ENSMUSG00000032306 | 44   | NA   | NA   | 0.28 | 1    | NA   | 0.24 |
| chr9 | 62525498 | 62525747 | Itga11        | ENSMUSG00000032243 | -11  | NA   | NA   | NA   | 1    | NA   | NA   |
| chr9 | 65246257 | 65246464 | Rasl12        | ENSMUSG00000041696 | 65   | NA   | NA   | 0.5  | NA   | NA   | 0.24 |
| chr9 | 65477002 | 65477518 | Rbpm2         | ENSMUSG00000032387 | -195 | NA   | NA   | 0.08 | 0.11 | NA   | 0.17 |
| chr9 | 65524246 | 65524586 | Oaz2          | ENSMUSG00000040652 | 61   | NA   | NA   | 0.09 | 0.15 | 0.08 | 0.18 |
| chr9 | 65916955 | 65917685 | Snx22         | ENSMUSG00000039452 | 218  | NA   | 0.2  | 0.25 | 0.22 | NA   | 0.09 |
| chr9 | 65972412 | 65972691 | Snx1          | ENSMUSG00000032382 | 53   | NA   | NA   | NA   | NA   | NA   | 0.2  |
| chr9 | 69245689 | 69246012 | Narg2         | ENSMUSG00000032235 | 137  | NA   | 0.1  | 0.1  | 0.1  | 0.08 | 0.12 |
| chr9 | 72379567 | 72379802 | 4930509E16Rik | ENSMUSG00000087091 | -19  | NA   | NA   | 0.67 | 0.37 | 0.31 | 0.4  |
| chr9 | 72806606 | 72806840 | Gm20510       | ENSMUSG00000089865 | 64   | NA   | 1    | 0.15 | 0.28 | NA   | 0.23 |
| chr9 | 72887240 | 72887774 | Pigb          | ENSMUSG00000079469 | -1   | NA   | 0.67 | 0.11 | 0.24 | 0.38 | 0.18 |
| chr9 | 72892503 | 72892859 | Rab27a        | ENSMUSG00000032202 | 9    | 0.2  | NA   | 0.11 | 0.33 | NA   | 0.21 |
| chr9 | 75531670 | 75532007 | Scg3          | ENSMUSG00000032181 | -35  | NA   | NA   | NA   | NA   | NA   | 0.17 |
| chr9 | 76171094 | 76171484 | Hctr2         | ENSMUSG00000032360 | 96   | NA   | 0.06 | 0.1  | 0.19 | 0.1  | 0.15 |
| chr9 | 78275265 | 78275572 | Gm8093        | ENSMUSG00000087052 | 104  | NA   | 0.34 | 0.13 | 0.11 | 0.26 | 0.24 |
| chr9 | 78669445 | 78669723 | Gm8116        | ENSMUSG00000059422 | 63   | NA   | NA   | 1    | NA   | NA   | NA   |
| chr9 | 83334415 | 83334891 | Lca5          | ENSMUSG00000032258 | -19  | NA   | 0.4  | 0.1  | 0.14 | 0.2  | 0.13 |

|      |           |           |               |                    |      |    |      |      |      |      |      |
|------|-----------|-----------|---------------|--------------------|------|----|------|------|------|------|------|
| chr9 | 83441734  | 83442240  | Sh3bgrl2      | ENSMUSG00000032261 | 53   | NA | 0.12 | 0.1  | 0.25 | 0.06 | 0.12 |
| chr9 | 87150112  | 87150472  | 4922501C03Rik | ENSMUSG00000056919 | -169 | NA | NA   | 0.12 | 0.15 | 0.05 | 0.16 |
| chr9 | 88221942  | 88222717  | Nt5e          | ENSMUSG00000032420 | -118 | NA | 0.11 | 0.16 | 0.14 | 0.08 | 0.16 |
| chr9 | 88494368  | 88494743  | Gm17683       | ENSMUSG00000091564 | 61   | NA | 0.22 | 0.18 | 0.1  | NA   | 0.08 |
| chr9 | 88614370  | 88614666  | Gm10634       | ENSMUSG00000074149 | 51   | NA | NA   | 0.08 | NA   | NA   | 0.08 |
| chr9 | 89105979  | 89106275  | Mthfs         | ENSMUSG00000066442 | 132  | NA | NA   | 0.25 | NA   | NA   | 0.3  |
| chr9 | 89517249  | 89517504  | AF529169      | ENSMUSG00000039313 | 448  | NA | 0.25 | 0.1  | 0.21 | 1    | 0.32 |
| chr9 | 91256295  | 91256570  | Zic4          | ENSMUSG00000036972 | -819 | 1  | NA   | 0.23 | 0.39 | NA   | 0.27 |
| chr9 | 91260583  | 91260819  | Zic1          | ENSMUSG00000032368 | -95  | NA | NA   | 0.34 | NA   | NA   | 0.43 |
| chr9 | 96019565  | 96020203  | Gk5           | ENSMUSG00000041440 | 103  | NA | 0.38 | 0.09 | 0.19 | 0.12 | 0.1  |
| chr9 | 98196908  | 98197364  | Nmnat3        | ENSMUSG00000032456 | 134  | NA | 1    | 0.16 | 0.33 | 0.25 | 0.12 |
| chr9 | 98501794  | 98502176  | Mrps22        | ENSMUSG00000032459 | 113  | NA | NA   | 0.1  | 0.16 | 0.14 | 0.26 |
| chr9 | 106269973 | 106270331 | Dusp7         | ENSMUSG00000053716 | -811 | NA | NA   | NA   | NA   | 1    | NA   |
| chr9 | 107428960 | 107429354 | Cacna2d2      | ENSMUSG00000010066 | 169  | NA | NA   | 0.4  | NA   | NA   | 0.38 |
| chr9 | 107483052 | 107483256 | Hyal3         | ENSMUSG00000036091 | 5    | NA | 0.33 | 0.13 | 0.2  | 0.5  | 0.15 |
| chr9 | 107951386 | 107951913 | Gmppb         | ENSMUSG00000070284 | 49   | NA | 0.46 | 0.18 | 1    | 1    | 0.2  |
| chr9 | 108012820 | 108013076 | Bsn           | ENSMUSG00000032589 | -204 | NA | NA   | 1    | NA   | NA   | NA   |
| chr9 | 108481382 | 108481620 | Wdr6          | ENSMUSG00000066357 | -431 | NA | NA   | NA   | NA   | NA   | 1    |
| chr9 | 108984639 | 108984937 | Ccdc72        | ENSMUSG00000091537 | 107  | NA | 0.08 | 0.09 | 0.13 | 0.07 | 0.13 |
| chr9 | 110559025 | 110559371 | Ccdc12        | ENSMUSG00000019659 | 191  | NA | NA   | 0.19 | 0.16 | NA   | 0.15 |
| chr9 | 110782465 | 110782944 | Tmie          | ENSMUSG00000049555 | -87  | NA | NA   | 0.12 | 0.67 | NA   | 0.5  |
| chr9 | 118834327 | 118834609 | Gm16295       | ENSMUSG00000087041 | 477  | NA | NA   | 0.11 | 0.09 | 1    | 0.24 |
| chr9 | 119065651 | 119066177 | Acaa1b        | ENSMUSG00000010651 | 297  | NA | NA   | 0.27 | 0.29 | 0.5  | 0.12 |
| chr9 | 119250628 | 119251085 | Acaa1a        | ENSMUSG00000036138 | 223  | NA | NA   | 0.1  | NA   | NA   | 0.6  |
| chr9 | 121686887 | 121687648 | Kbtbd5        | ENSMUSG00000074001 | 542  | NA | NA   | 0.25 | NA   | NA   | NA   |
| chr9 | 122480534 | 122480793 | 9530059O14Rik | ENSMUSG00000086476 | -952 | NA | 0.5  | 1    | NA   | NA   | NA   |
| chr9 | 122714644 | 122714976 | D9Ert402e     | ENSMUSG00000046603 | 153  | NA | NA   | 0.09 | 0.23 | 0.16 | 0.09 |
| chr9 | 122812419 | 122812654 | A530083I20Rik | ENSMUSG00000086343 | -234 | NA | NA   | 0.17 | NA   | 0.2  | NA   |
| chr9 | 123275872 | 123276249 | Lars2         | ENSMUSG00000035202 | 2    | NA | NA   | 0.2  | 0.39 | 0.06 | 0.15 |

| mMYCN1.diff | mMYCN2.diff | mSmoA1.diff | mSmoA2.diff | mMYCN1.pval | mMYCN2.pval | mSmoA1.pval | mSmoA2.pval | mMYCN1.anno | mMYCN2.anno | mSmoA1.anno | mSmoA2.anno |
|-------------|-------------|-------------|-------------|-------------|-------------|-------------|-------------|-------------|-------------|-------------|-------------|
| 0.27        | 0.3         | 0.16        | 0.18        | 2.50E-13    | 6.10E-22    | 6.30E-11    | 1.00E-10    | hyper1      | hyper1      | hyper1      | hyper1      |
| 0.09        | 0.1         | 0.07        | 0.22        | 9.60E-27    | 3.70E-31    | 8.70E-12    | 5.40E-73    | hyper1      | hyper1      | hyper1      | hyper1      |
| -0.03       | 0.18        | 0.1         | 0.2         | 0.16        | 9.40E-18    | 8.00E-17    | 2.40E-53    | NA          | hyper1      | hyper1      | hyper1      |
| 0.31        | 0.36        | 0.14        | 0.31        | 1.50E-49    | 1.60E-102   | 9.60E-22    | 1.40E-41    | hyper1      | hyper2      | hyper1      | hyper1      |
| 0.19        | 0.34        | 0.21        | 0.2         | 1.60E-12    | 2.10E-39    | 2.60E-13    | 8.20E-13    | hyper1      | hyper2      | hyper1      | hyper1      |
| 0.59        | 0.64        | 0.19        | 0.18        | 2.30E-80    | 9.90E-94    | 4.20E-13    | 2.60E-13    | hyper2      | hyper3      | hyper1      | hyper1      |
| 0           | -0.17       | 0.06        | 0.31        | 0.17        | 0           | 4.20E-252   | 0           | NA          | hypo1       | hyper1      | hyper1      |
| -0.32       | -0.08       | 0.13        | 0.32        | 3.90E-32    | 0.0034      | 2.60E-10    | 3.20E-45    | hypo1       | NA          | hyper1      | hyper1      |
| 0.12        | 0.02        | 0.22        | 0.25        | 0.07        | 0.87        | 2.00E-11    | 2.60E-13    | NA          | NA          | hyper1      | hyper1      |
| 0.14        | 0.04        | 0.1         | 0.18        | 7.40E-08    | 0.0089      | 6.00E-13    | 9.60E-35    | NA          | NA          | hyper1      | hyper1      |
| -0.03       | 0.02        | 0.13        | 0.11        | 0.34        | 0.44        | 7.40E-15    | 2.00E-13    | NA          | NA          | hyper1      | hyper1      |
| 0.09        | 0.06        | 0.2         | 0.22        | 6.30E-05    | 0.0041      | 9.80E-34    | 2.20E-35    | NA          | NA          | hyper1      | hyper1      |
| 0.01        | 0.01        | 0.2         | 0.18        | 0.58        | 0.49        | 1.70E-33    | 9.30E-21    | NA          | NA          | hyper1      | hyper1      |
| 0.14        | 0.19        | 0.21        | 0.32        | 0.12        | 0.00013     | 1.90E-11    | 8.20E-28    | NA          | NA          | hyper1      | hyper1      |
| 0.18        | 0.17        | 0.15        | 0.26        | 1.00E-06    | 1.80E-07    | 5.30E-11    | 1.30E-22    | NA          | NA          | hyper1      | hyper1      |
| 0.15        | 0.01        | 0.1         | 0.32        | 0.00013     | 0.55        | 4.60E-16    | 1.70E-91    | NA          | NA          | hyper1      | hyper1      |
| 0.41        | -0.08       | -0.13       | 0.29        | 4.50E-134   | 3.30E-09    | 7.30E-23    | 9.00E-86    | hyper2      | NA          | hypo1       | hyper1      |
| 0.17        | 0.18        | 0.05        | 0.14        | 5.40E-11    | 1.70E-14    | 0.0022      | 1.10E-12    | hyper1      | hyper1      | NA          | hyper1      |
| 0.17        | 0.21        | -0.05       | 0.23        | 1.50E-23    | 1.80E-34    | 0.00069     | 9.30E-39    | hyper1      | hyper1      | NA          | hyper1      |
| 0.15        | 0.17        | 0.07        | 0.09        | 2.10E-18    | 1.10E-23    | 5.70E-08    | 4.80E-11    | hyper1      | hyper1      | NA          | hyper1      |
| 0.29        | 0.26        | 0.03        | 0.25        | 1.50E-29    | 7.60E-27    | 0.072       | 3.30E-34    | hyper1      | hyper1      | NA          | hyper1      |
| 0.34        | 0.25        | 0.01        | 0.17        | 9.60E-23    | 2.20E-13    | 0.63        | 4.50E-11    | hyper2      | hyper1      | NA          | hyper1      |
| 0.52        | 0.3         | -0.08       | 0.17        | 5.40E-70    | 6.80E-28    | 0.00096     | 1.10E-13    | hyper2      | hyper1      | NA          | hyper1      |

|       |       |       |      |          |           |          |          |        |        |    |        |
|-------|-------|-------|------|----------|-----------|----------|----------|--------|--------|----|--------|
| 0.14  | 0.18  | -0.02 | 0.11 | 6.80E-09 | 1.10E-15  | 0.2      | 2.10E-12 | NA     | hyper1 | NA | hyper1 |
| 0.17  | 0.33  | 0.04  | 0.19 | 1.20E-42 | 1.40E-146 | 0.0012   | 9.00E-41 | hyper1 | hyper2 | NA | hyper1 |
| 0.35  | 0.35  | 0.05  | 0.18 | 3.10E-47 | 1.30E-45  | 0.0048   | 3.20E-20 | hyper2 | hyper2 | NA | hyper1 |
| 0.22  | 0.11  | 0.1   | 0.24 | 5.10E-17 | 9.10E-05  | 0.00014  | 4.00E-15 | hyper1 | NA     | NA | hyper1 |
| 0.41  | 0.23  | -0.03 | 0.28 | 5.70E-32 | 1.60E-09  | 0.27     | 5.20E-23 | hyper2 | NA     | NA | hyper1 |
| -0.1  | -0.11 | -0.01 | 0.15 | 0.00072  | 4.30E-08  | 0.75     | 1.60E-13 | NA     | NA     | NA | hyper1 |
| 0.08  | 0.17  | 0.03  | 0.27 | 0.49     | 0.022     | 0.24     | 2.10E-17 | NA     | NA     | NA | hyper1 |
| 0.01  | 0     | 0.04  | 0.19 | 0.94     | 1         | 0.049    | 5.70E-15 | NA     | NA     | NA | hyper1 |
| 0.03  | -0.06 | 0.01  | 0.18 | 1        | 0.34      | 0.61     | 5.90E-12 | NA     | NA     | NA | hyper1 |
| 0     | 0.07  | -0.03 | 0.15 | 1        | 0.049     | 0.037    | 5.80E-16 | NA     | NA     | NA | hyper1 |
| 0.59  | 0.15  | -0.04 | 0.15 | 0.00011  | 0.14      | 0.014    | 3.00E-10 | NA     | NA     | NA | hyper1 |
| 0.12  | 0.04  | -0.01 | 0.14 | 0.016    | 0.21      | 0.65     | 4.70E-10 | NA     | NA     | NA | hyper1 |
| 0.09  | 0.11  | 0.03  | 0.24 | 0.051    | 0.034     | 0.15     | 2.00E-21 | NA     | NA     | NA | hyper1 |
| -0.03 | 0.04  | 0.03  | 0.14 | 0.61     | 0.17      | 0.042    | 5.70E-14 | NA     | NA     | NA | hyper1 |
| 0     | 0.15  | 0.06  | 0.25 | 1        | 0.0025    | 0.045    | 7.90E-13 | NA     | NA     | NA | hyper1 |
| -0.07 | 0.01  | 0     | 0.12 | 0.0017   | 0.86      | 0.84     | 5.50E-10 | NA     | NA     | NA | hyper1 |
| 0.26  | 0.35  | 0     | 0.29 | 0.0023   | 0.00039   | 0.99     | 1.20E-15 | NA     | NA     | NA | hyper1 |
| -0.06 | -0.02 | 0.02  | 0.12 | 0.19     | 0.92      | 0.34     | 3.10E-10 | NA     | NA     | NA | hyper1 |
| 0.03  | 0.09  | 0     | 0.12 | 0.28     | 0.0023    | 0.83     | 1.20E-12 | NA     | NA     | NA | hyper1 |
| 0.02  | 0.02  | 0     | 0.12 | 0.31     | 0.41      | 0.97     | 4.00E-11 | NA     | NA     | NA | hyper1 |
| 0.14  | 0.08  | 0.16  | 0.32 | 3.30E-05 | 0.0068    | 1.60E-06 | 8.10E-18 | NA     | NA     | NA | hyper1 |
| -0.2  | -0.18 | 0     | 0.11 | 0.0018   | 0.0021    | 0.81     | 1.10E-10 | NA     | NA     | NA | hyper1 |
| 0.24  | 0.23  | 0.13  | 0.27 | 0.011    | 0.0049    | 3.50E-07 | 1.40E-19 | NA     | NA     | NA | hyper1 |
| 0.12  | -0.17 | -0.02 | 0.14 | 0.14     | 0.00083   | 0.27     | 3.40E-10 | NA     | NA     | NA | hyper1 |
| 0.07  | 0.07  | 0.11  | 0.19 | 0.41     | 0.51      | 5.10E-05 | 5.00E-11 | NA     | NA     | NA | hyper1 |
| 0.02  | 0.02  | 0.01  | 0.23 | 0.53     | 0.62      | 0.39     | 3.00E-34 | NA     | NA     | NA | hyper1 |
| 0.06  | -0.04 | 0     | 0.27 | 0.63     | 0.43      | 0.96     | 1.30E-28 | NA     | NA     | NA | hyper1 |
| 0     | 0     | 0.12  | 0.28 | 1        | 1         | 9.40E-07 | 2.80E-25 | NA     | NA     | NA | hyper1 |
| 0.34  | 0.11  | 0.02  | 0.21 | 0.023    | 0.19      | 0.51     | 6.30E-15 | NA     | NA     | NA | hyper1 |
| 0.12  | 0.02  | 0.05  | 0.22 | 0.089    | 0.51      | 0.013    | 5.80E-17 | NA     | NA     | NA | hyper1 |

|       |       |       |      |          |          |          |          |    |    |    |        |
|-------|-------|-------|------|----------|----------|----------|----------|----|----|----|--------|
| 0.04  | 0.1   | 0     | 0.14 | 0.19     | 0.088    | 0.95     | 1.20E-11 | NA | NA | NA | hyper1 |
| 0.02  | -0.02 | -0.03 | 0.16 | 0.56     | 0.29     | 0.021    | 6.30E-31 | NA | NA | NA | hyper1 |
| 0.03  | -0.03 | 0.02  | 0.07 | 0.15     | 0.013    | 9.10E-05 | 3.60E-39 | NA | NA | NA | hyper1 |
| 0.12  | 0     | 0.05  | 0.3  | 0.27     | 1        | 0.32     | 6.10E-10 | NA | NA | NA | hyper1 |
| 0.11  | -0.02 | 0.13  | 0.25 | 0.32     | 0.53     | 4.00E-09 | 2.00E-24 | NA | NA | NA | hyper1 |
| 0.03  | -0.01 | 0.08  | 0.13 | 0.39     | 0.67     | 1.00E-08 | 2.00E-20 | NA | NA | NA | hyper1 |
| NA    | NA    | 0.07  | 0.3  | NA       | NA       | 0.0025   | 3.00E-25 | NA | NA | NA | hyper1 |
| 0.06  | 0     | -0.01 | 0.15 | 0.0088   | 1        | 0.51     | 1.40E-10 | NA | NA | NA | hyper1 |
| -0.12 | -0.16 | -0.06 | 0.19 | 7.10E-05 | 2.70E-06 | 0.02     | 1.20E-12 | NA | NA | NA | hyper1 |
| 0.17  | 0.15  | -0.01 | 0.1  | 0.00033  | 0.00083  | 0.45     | 8.90E-10 | NA | NA | NA | hyper1 |
| 0.09  | 0.15  | -0.02 | 0.19 | 0.32     | 0.0098   | 0.4      | 1.60E-12 | NA | NA | NA | hyper1 |
| 0.22  | 0.02  | 0.06  | 0.3  | 0.00015  | 0.82     | 0.097    | 9.00E-14 | NA | NA | NA | hyper1 |
| 0.05  | 0.1   | 0.01  | 0.11 | 0.027    | 6.00E-04 | 0.3      | 1.80E-14 | NA | NA | NA | hyper1 |
| -0.03 | -0.03 | 0.03  | 0.19 | 0.45     | 0.43     | 0.1      | 2.20E-16 | NA | NA | NA | hyper1 |
| 0.05  | 0.02  | 0     | 0.19 | 0.02     | 0.15     | 0.81     | 1.40E-20 | NA | NA | NA | hyper1 |
| 0.04  | 0     | 0.02  | 0.11 | 0.048    | 0.89     | 0.094    | 1.80E-15 | NA | NA | NA | hyper1 |
| 0.29  | 0     | 0.01  | 0.15 | 0.00026  | 0.99     | 0.52     | 4.80E-13 | NA | NA | NA | hyper1 |
| 0.12  | 0     | -0.01 | 0.16 | 0.00056  | 1        | 0.39     | 1.20E-18 | NA | NA | NA | hyper1 |
| -0.01 | 0.01  | -0.01 | 0.11 | 0.87     | 0.78     | 0.63     | 1.90E-14 | NA | NA | NA | hyper1 |
| -0.02 | 0.08  | -0.02 | 0.29 | 0.87     | 0.03     | 0.56     | 9.40E-21 | NA | NA | NA | hyper1 |
| -0.09 | 0.05  | -0.01 | 0.18 | 0.071    | 0.29     | 0.61     | 1.70E-12 | NA | NA | NA | hyper1 |
| 0.11  | 0.11  | 0     | 0.2  | 0.18     | 0.043    | 0.97     | 4.30E-14 | NA | NA | NA | hyper1 |
| 0.03  | -0.04 | -0.04 | 0.13 | 0.34     | 0.084    | 0.00024  | 1.30E-20 | NA | NA | NA | hyper1 |
| -0.06 | -0.03 | 0.05  | 0.28 | 0.55     | 0.71     | 0.087    | 4.10E-13 | NA | NA | NA | hyper1 |
| 0.04  | 0.06  | 0.01  | 0.12 | 0.72     | 0.16     | 0.38     | 8.00E-10 | NA | NA | NA | hyper1 |
| -0.06 | 0.07  | 0.03  | 0.12 | 0.059    | 0.046    | 0.08     | 8.50E-10 | NA | NA | NA | hyper1 |
| -0.03 | -0.04 | -0.01 | 0.13 | 0.096    | 0.01     | 0.55     | 6.60E-10 | NA | NA | NA | hyper1 |
| 0.02  | -0.03 | 0.01  | 0.12 | 0.76     | 0.84     | 0.38     | 1.80E-11 | NA | NA | NA | hyper1 |
| 0.17  | 0.21  | 0.17  | 0.28 | 0.00014  | 1.60E-08 | 1.10E-09 | 9.80E-17 | NA | NA | NA | hyper1 |
| 0.21  | -0.01 | -0.02 | 0.17 | 0.0015   | 0.85     | 0.38     | 5.80E-12 | NA | NA | NA | hyper1 |



|       |       |       |      |        |          |          |          |    |    |    |        |
|-------|-------|-------|------|--------|----------|----------|----------|----|----|----|--------|
| -0.05 | -0.02 | 0     | 0.09 | 0.14   | 0.45     | 0.82     | 1.70E-11 | NA | NA | NA | hyper1 |
| 0.08  | 0.08  | 0.03  | 0.21 | 0.36   | 0.22     | 0.17     | 1.60E-14 | NA | NA | NA | hyper1 |
| 0.06  | 0.12  | -0.03 | 0.17 | 0.36   | 0.075    | 0.065    | 1.20E-13 | NA | NA | NA | hyper1 |
| 0.04  | 0.06  | 0.15  | 0.25 | 0.39   | 0.14     | 1.20E-07 | 3.10E-15 | NA | NA | NA | hyper1 |
| 0.14  | 0.18  | 0.07  | 0.28 | 0.49   | 0.0026   | 0.011    | 4.10E-11 | NA | NA | NA | hyper1 |
| 0     | 0.05  | -0.02 | 0.07 | 0.95   | 0.012    | 0.021    | 2.10E-10 | NA | NA | NA | hyper1 |
| NA    | NA    | 0.12  | 0.32 | NA     | NA       | 6.60E-05 | 1.80E-15 | NA | NA | NA | hyper1 |
| 0.1   | 0.05  | 0.02  | 0.1  | 0.003  | 0.096    | 0.057    | 6.10E-11 | NA | NA | NA | hyper1 |
| 0.08  | 0.08  | -0.01 | 0.09 | 0.0087 | 0.0063   | 0.3      | 1.50E-11 | NA | NA | NA | hyper1 |
| 0.15  | 0     | -0.01 | 0.15 | 0.1    | 1        | 0.79     | 1.50E-12 | NA | NA | NA | hyper1 |
| 0.04  | -0.02 | 0.03  | 0.22 | 0.13   | 0.26     | 0.0034   | 1.10E-56 | NA | NA | NA | hyper1 |
| 0.05  | 0.04  | -0.05 | 0.13 | 0.28   | 0.11     | 0.0057   | 6.80E-10 | NA | NA | NA | hyper1 |
| -0.06 | -0.06 | -0.01 | 0.2  | 0.34   | 0.37     | 0.74     | 3.20E-10 | NA | NA | NA | hyper1 |
| NA    | 0.03  | 0.06  | 0.29 | NA     | 1        | 0.023    | 4.70E-12 | NA | NA | NA | hyper1 |
| 0.06  | 0.13  | 0.02  | 0.15 | 0.22   | 0.0013   | 0.34     | 6.00E-15 | NA | NA | NA | hyper1 |
| 0.08  | -0.02 | 0.04  | 0.26 | 0.27   | 1        | 0.095    | 1.70E-19 | NA | NA | NA | hyper1 |
| 0.15  | 0.58  | 0.01  | 0.16 | 0.34   | 6.90E-05 | 0.66     | 5.70E-10 | NA | NA | NA | hyper1 |
| 0     | 0.06  | -0.03 | 0.12 | 1      | 0.058    | 0.029    | 1.10E-12 | NA | NA | NA | hyper1 |
| 0     | 0.02  | 0     | 0.12 | 1      | 0.56     | 0.99     | 1.40E-10 | NA | NA | NA | hyper1 |
| 0.41  | 0.25  | 0.07  | 0.18 | 0.0012 | 0.0039   | 0.005    | 6.20E-12 | NA | NA | NA | hyper1 |
| 0.06  | -0.02 | -0.02 | 0.06 | 0.018  | 0.35     | 0.083    | 3.90E-10 | NA | NA | NA | hyper1 |
| 0.16  | -0.01 | 0.06  | 0.24 | 0.11   | 0.93     | 0.006    | 5.10E-25 | NA | NA | NA | hyper1 |
| 0.06  | 0.08  | 0.17  | 0.19 | 0.26   | 0.011    | 1.80E-08 | 3.30E-11 | NA | NA | NA | hyper1 |
| 0.17  | 0.15  | 0.16  | 0.31 | 0.34   | 0.021    | 9.80E-07 | 6.40E-16 | NA | NA | NA | hyper1 |
| 0.01  | -0.01 | 0.01  | 0.16 | 0.45   | 0.58     | 0.23     | 1.90E-36 | NA | NA | NA | hyper1 |
| 0.01  | 0.02  | 0.02  | 0.09 | 0.77   | 0.29     | 0.14     | 7.70E-11 | NA | NA | NA | hyper1 |
| -0.04 | 0.13  | 0.02  | 0.2  | 0.82   | 0.013    | 0.27     | 6.40E-13 | NA | NA | NA | hyper1 |
| -0.01 | 0.06  | 0.06  | 0.28 | 0.88   | 0.056    | 0.033    | 6.10E-15 | NA | NA | NA | hyper1 |
| -0.01 | 0.06  | 0.03  | 0.18 | 1      | 0.32     | 0.088    | 3.70E-12 | NA | NA | NA | hyper1 |
| NA    | NA    | 0.08  | 0.28 | NA     | NA       | 0.00066  | 7.70E-18 | NA | NA | NA | hyper1 |

|       |      |       |      |           |           |           |           |        |        |        |        |
|-------|------|-------|------|-----------|-----------|-----------|-----------|--------|--------|--------|--------|
| 0.02  | 0.04 | 0.02  | 0.2  | 0.56      | 0.12      | 0.38      | 9.40E-13  | NA     | NA     | NA     | hyper1 |
| 0.2   | 0.01 | 0.15  | 0.31 | 0.004     | 0.99      | 1.70E-06  | 3.50E-18  | NA     | NA     | NA     | hyper1 |
| 0.04  | 0.08 | 0.02  | 0.15 | 0.097     | 0.00024   | 0.14      | 9.30E-22  | NA     | NA     | NA     | hyper1 |
| 0.19  | 0.26 | 0.1   | 0.21 | 0.2       | 0.11      | 1.00E-05  | 4.40E-14  | NA     | NA     | NA     | hyper1 |
| 0.03  | 0.09 | 0.01  | 0.13 | 0.61      | 0.057     | 0.61      | 3.30E-13  | NA     | NA     | NA     | hyper1 |
| -0.02 | 0.29 | -0.03 | 0.15 | 0.98      | 1.80E-07  | 0.24      | 2.30E-11  | NA     | NA     | NA     | hyper1 |
| 0     | 0    | -0.01 | 0.17 | 1         | 1         | 0.68      | 2.30E-10  | NA     | NA     | NA     | hyper1 |
| 0.28  | 0.29 | 0.21  | 0.47 | 1.30E-82  | 7.50E-111 | 1.70E-44  | 3.30E-148 | hyper1 | hyper1 | hyper1 | hyper2 |
| 0.32  | 0.31 | 0.31  | 0.38 | 2.40E-15  | 7.30E-15  | 3.10E-19  | 7.70E-23  | hyper1 | hyper1 | hyper1 | hyper2 |
| 0.39  | 0.25 | 0.25  | 0.36 | 2.40E-32  | 3.10E-15  | 8.20E-14  | 6.40E-20  | hyper2 | hyper1 | hyper1 | hyper2 |
| 0.35  | 0.33 | 0.23  | 0.43 | 1.30E-34  | 4.10E-37  | 5.50E-13  | 6.70E-30  | hyper2 | hyper1 | hyper1 | hyper2 |
| 0     | 0.28 | 0.22  | 0.38 | 1         | 1.10E-14  | 1.20E-19  | 1.90E-38  | NA     | hyper1 | hyper1 | hyper2 |
| 0.1   | 0.23 | 0.28  | 0.37 | 0.0019    | 9.50E-15  | 1.80E-22  | 6.70E-33  | NA     | hyper1 | hyper1 | hyper2 |
| 0.06  | 0.13 | 0.11  | 0.33 | 4.10E-05  | 3.70E-15  | 2.50E-19  | 1.60E-111 | NA     | hyper1 | hyper1 | hyper2 |
| 0.28  | 0.41 | 0.3   | 0.44 | 2.30E-15  | 1.80E-32  | 1.90E-27  | 2.90E-53  | hyper1 | hyper2 | hyper1 | hyper2 |
| 0.35  | 0.41 | 0.14  | 0.44 | 1.50E-79  | 2.70E-108 | 8.30E-20  | 1.80E-99  | hyper2 | hyper2 | hyper1 | hyper2 |
| 0.43  | 0.37 | 0.32  | 0.46 | 8.50E-186 | 3.10E-152 | 4.20E-158 | 3.10E-274 | hyper2 | hyper2 | hyper1 | hyper2 |
| 0.42  | 0.61 | 0.19  | 0.43 | 4.30E-38  | 3.50E-71  | 1.30E-20  | 9.40E-66  | hyper2 | hyper3 | hyper1 | hyper2 |
| 0.05  | 0.07 | 0.26  | 0.52 | 0.11      | 0.023     | 5.80E-30  | 1.20E-78  | NA     | NA     | hyper1 | hyper2 |
| NA    | NA   | 0.22  | 0.34 | NA        | NA        | 2.30E-13  | 1.70E-27  | NA     | NA     | hyper1 | hyper2 |
| 0.03  | 0.02 | 0.22  | 0.39 | 0.75      | 0.97      | 1.40E-10  | 4.50E-23  | NA     | NA     | hyper1 | hyper2 |
| 0.19  | 0.05 | 0.16  | 0.4  | 0.00017   | 0.16      | 1.40E-23  | 3.70E-89  | NA     | NA     | hyper1 | hyper2 |
| 0.08  | 0.02 | 0.21  | 0.41 | 2.10E-05  | 0.25      | 1.30E-36  | 5.40E-109 | NA     | NA     | hyper1 | hyper2 |
| 0.24  | 0.34 | 0.44  | 0.44 | 0.00013   | 7.20E-11  | 5.90E-33  | 1.60E-30  | NA     | hyper2 | hyper2 | hyper2 |
| 0.7   | 0.75 | 0.51  | 0.46 | 6.20E-44  | 2.30E-48  | 2.70E-36  | 2.20E-24  | hyper3 | hyper3 | hyper2 | hyper2 |
| 0.4   | 0.26 | 0.21  | 0.34 | 1.60E-24  | 1.50E-11  | 1.70E-09  | 4.20E-17  | hyper2 | hyper1 | NA     | hyper2 |
| 0.13  | 0.19 | 0.15  | 0.33 | 5.60E-06  | 6.60E-11  | 3.70E-08  | 2.00E-20  | NA     | hyper1 | NA     | hyper2 |
| 0.03  | 0.22 | 0.15  | 0.46 | 0.38      | 5.70E-10  | 0.00011   | 1.40E-24  | NA     | hyper1 | NA     | hyper2 |
| 0.25  | 0.23 | 0.11  | 0.4  | 1.30E-09  | 3.10E-10  | 0.00014   | 2.10E-28  | NA     | hyper1 | NA     | hyper2 |
| 0.43  | 0.35 | 0.15  | 0.42 | 2.70E-39  | 1.60E-32  | 2.30E-09  | 4.40E-46  | hyper2 | hyper2 | NA     | hyper2 |

|       |       |       |      |          |          |          |          |        |        |    |        |
|-------|-------|-------|------|----------|----------|----------|----------|--------|--------|----|--------|
| 0.38  | 0.38  | 0.11  | 0.36 | 1.00E-15 | 1.50E-12 | 0.0016   | 8.20E-18 | hyper2 | hyper2 | NA | hyper2 |
| 0.46  | 0.35  | 0.09  | 0.41 | 5.50E-83 | 1.20E-88 | 3.50E-07 | 2.50E-30 | hyper2 | hyper2 | NA | hyper2 |
| 0.49  | 0.46  | 0.08  | 0.38 | 6.90E-20 | 1.60E-17 | 0.16     | 1.70E-11 | hyper2 | hyper2 | NA | hyper2 |
| -0.09 | 0.39  | 0.16  | 0.36 | 0.093    | 4.20E-17 | 3.50E-07 | 2.90E-24 | NA     | hyper2 | NA | hyper2 |
| 0.35  | 0.54  | 0.23  | 0.34 | 3.80E-05 | 6.00E-14 | 4.00E-05 | 6.10E-11 | NA     | hyper2 | NA | hyper2 |
| 0.16  | 0.11  | 0.11  | 0.35 | 1.50E-11 | 4.10E-08 | 1.50E-08 | 6.10E-53 | hyper1 | NA     | NA | hyper2 |
| 0.55  | -0.01 | 0.21  | 0.39 | 3.60E-15 | 1        | 9.30E-05 | 5.80E-13 | hyper2 | NA     | NA | hyper2 |
| 0.3   | 0.13  | 0.16  | 0.36 | 0.00024  | 0.12     | 3.30E-05 | 1.10E-15 | NA     | NA     | NA | hyper2 |
| -0.11 | 0.01  | 0.29  | 0.55 | 0.039    | 1        | 1.20E-06 | 1.60E-21 | NA     | NA     | NA | hyper2 |
| -0.03 | 0.06  | 0.07  | 0.34 | 0.82     | 0.16     | 0.044    | 7.50E-12 | NA     | NA     | NA | hyper2 |
| -0.22 | -0.2  | 0.17  | 0.37 | 0.026    | 0.14     | 4.30E-05 | 4.10E-17 | NA     | NA     | NA | hyper2 |
| 0.09  | 0.04  | -0.05 | 0.34 | 0.38     | 0.84     | 0.28     | 7.80E-13 | NA     | NA     | NA | hyper2 |
| 0.18  | 0.1   | 0.06  | 0.33 | 5.60E-06 | 6.10E-05 | 0.00053  | 1.20E-49 | NA     | NA     | NA | hyper2 |
| -0.18 | 0     | 0.11  | 0.42 | 0.23     | 1        | 0.00031  | 3.90E-31 | NA     | NA     | NA | hyper2 |
| 0.07  | 0.3   | 0.06  | 0.38 | 0.24     | 6.20E-05 | 0.061    | 2.20E-24 | NA     | NA     | NA | hyper2 |
| 0.65  | 0.47  | 0.11  | 0.35 | 0.25     | 0.00025  | 0.00077  | 1.60E-21 | NA     | NA     | NA | hyper2 |
| NA    | -0.6  | 0.19  | 0.42 | NA       | 0.4      | 3.30E-06 | 8.10E-17 | NA     | NA     | NA | hyper2 |
| 0.63  | 0.11  | 0.04  | 0.41 | 2.70E-07 | 0.16     | 0.11     | 2.00E-22 | NA     | NA     | NA | hyper2 |
| -0.11 | 0.05  | 0.16  | 0.35 | 0.18     | 0.67     | 3.80E-07 | 2.00E-22 | NA     | NA     | NA | hyper2 |
| -0.04 | 0.37  | -0.02 | 0.41 | 0.63     | 0.00087  | 0.6      | 3.90E-13 | NA     | NA     | NA | hyper2 |
| -0.12 | -0.16 | 0.29  | 0.4  | 0.25     | 0.082    | 1.80E-07 | 1.70E-10 | NA     | NA     | NA | hyper2 |
| -0.02 | 0     | 0.12  | 0.36 | 1        | 1        | 0.0067   | 1.50E-14 | NA     | NA     | NA | hyper2 |
| 0.38  | 0.19  | 0.14  | 0.33 | 5.10E-07 | 3.50E-08 | 1.10E-06 | 2.60E-19 | NA     | NA     | NA | hyper2 |
| 0.3   | -0.05 | -0.05 | 0.45 | 0.00079  | 0.69     | 0.13     | 5.00E-18 | NA     | NA     | NA | hyper2 |
| 0.26  | 0.15  | 0.17  | 0.56 | 0.0029   | 0.066    | 0.0037   | 1.00E-16 | NA     | NA     | NA | hyper2 |
| 0.2   | 0.22  | 0.19  | 0.35 | 0.1      | 0.04     | 0.00077  | 8.40E-11 | NA     | NA     | NA | hyper2 |
| 0.16  | -0.04 | 0.04  | 0.4  | 0.28     | 0.84     | 0.32     | 4.50E-12 | NA     | NA     | NA | hyper2 |
| -0.01 | 0.44  | 0.03  | 0.38 | 1        | 4.50E-05 | 0.19     | 3.40E-15 | NA     | NA     | NA | hyper2 |
| -0.02 | -0.01 | -0.02 | 0.34 | 0.51     | 0.7      | 0.52     | 2.80E-17 | NA     | NA     | NA | hyper2 |
| 0.16  | 0.29  | 0.06  | 0.34 | 0.0019   | 1.10E-07 | 0.081    | 1.20E-13 | NA     | NA     | NA | hyper2 |

|       |       |       |       |          |          |          |          |       |        |        |        |
|-------|-------|-------|-------|----------|----------|----------|----------|-------|--------|--------|--------|
| 0.16  | 0.23  | 0.24  | 0.64  | 7.90E-05 | 6.60E-05 | 3.70E-14 | 9.40E-65 | NA    | NA     | hyper1 | hyper3 |
| 0     | -0.01 | 0.39  | 0.65  | 1        | 0.99     | 5.00E-18 | 1.10E-40 | NA    | NA     | hyper2 | hyper3 |
| 0     | 0.5   | 0.4   | 0.61  | 1        | 0.58     | 5.60E-07 | 7.00E-15 | NA    | NA     | NA     | hyper3 |
| -0.13 | -0.1  | 0.31  | 0.82  | 0.56     | 0.54     | 0.00017  | 1.70E-13 | NA    | NA     | NA     | hyper3 |
| NA    | NA    | 0.07  | 0.86  | NA       | NA       | 0.65     | 6.70E-10 | NA    | NA     | NA     | hyper3 |
| -0.02 | 0.27  | -0.21 | -0.2  | 0.7      | 9.40E-18 | 2.20E-21 | 8.60E-18 | NA    | hyper1 | hypo1  | hypo1  |
| 0.04  | -0.03 | -0.15 | -0.11 | 0.059    | 0.051    | 5.60E-29 | 1.10E-11 | NA    | NA     | hypo1  | hypo1  |
| 0.01  | 0     | -0.29 | -0.17 | 0.94     | 1        | 9.00E-47 | 7.00E-12 | NA    | NA     | hypo1  | hypo1  |
| 0.11  | 0.16  | -0.28 | -0.28 | 0.028    | 0.018    | 1.10E-13 | 6.60E-13 | NA    | NA     | hypo1  | hypo1  |
| 0     | -0.04 | -0.29 | -0.12 | 0.95     | 0.022    | 2.40E-69 | 3.20E-10 | NA    | NA     | hypo1  | hypo1  |
| 0.07  | 0.04  | -0.11 | -0.07 | 6.80E-06 | 0.00024  | 2.10E-31 | 2.90E-14 | NA    | NA     | hypo1  | hypo1  |
| -0.38 | -0.23 | -0.27 | -0.31 | 9.00E-08 | 6.00E-04 | 5.60E-10 | 4.80E-12 | NA    | NA     | hypo1  | hypo1  |
| -0.13 | -0.08 | -0.17 | -0.21 | 1.10E-05 | 0.0013   | 6.00E-13 | 1.60E-15 | NA    | NA     | hypo1  | hypo1  |
| 0.08  | 0     | -0.29 | -0.22 | 0.19     | 1        | 1.80E-18 | 1.00E-10 | NA    | NA     | hypo1  | hypo1  |
| -0.01 | -0.03 | -0.28 | -0.31 | 1        | 0.71     | 5.50E-12 | 3.60E-12 | NA    | NA     | hypo1  | hypo1  |
| -0.02 | 0     | -0.19 | -0.14 | 0.32     | 0.99     | 2.40E-37 | 3.10E-13 | NA    | NA     | hypo1  | hypo1  |
| -0.03 | -0.04 | -0.32 | -0.24 | 0.23     | 0.23     | 1.80E-27 | 4.60E-14 | NA    | NA     | hypo1  | hypo1  |
| -0.11 | -0.07 | -0.24 | -0.22 | 0.00082  | 0.032    | 2.70E-15 | 3.60E-13 | NA    | NA     | hypo1  | hypo1  |
| 0.08  | 0     | -0.48 | -0.31 | 0.099    | 1        | 5.00E-79 | 3.90E-24 | NA    | NA     | hypo2  | hypo1  |
| 0.01  | -0.11 | -0.35 | -0.21 | 1        | 0.028    | 8.60E-23 | 6.70E-11 | NA    | NA     | hypo2  | hypo1  |
| -0.11 | -0.01 | -0.35 | -0.25 | 0.58     | 1        | 2.20E-29 | 4.20E-11 | NA    | NA     | hypo2  | hypo1  |
| 0.09  | 0.03  | -0.36 | -0.31 | 0.12     | 0.58     | 3.60E-29 | 5.30E-22 | NA    | NA     | hypo2  | hypo1  |
| -0.08 | -0.03 | -0.08 | -0.15 | 0.016    | 0.54     | 0.0032   | 8.10E-12 | NA    | NA     | NA     | hypo1  |
| 0.08  | -0.03 | -0.07 | -0.12 | 0.26     | 0.56     | 0.00051  | 2.40E-13 | NA    | NA     | NA     | hypo1  |
| -0.02 | 0.08  | -0.11 | -0.14 | 0.57     | 0.049    | 6.90E-06 | 7.40E-10 | NA    | NA     | NA     | hypo1  |
| 0.18  | 0.18  | -0.22 | -0.27 | 0.00016  | 0.00037  | 3.00E-09 | 2.40E-12 | NA    | NA     | NA     | hypo1  |
| -0.41 | -0.5  | -0.4  | -0.46 | 2.80E-05 | 6.20E-12 | 3.50E-20 | 3.40E-25 | NA    | hypo2  | hypo2  | hypo2  |
| -0.6  | -0.68 | -0.49 | -0.47 | 2.40E-38 | 9.80E-48 | 9.20E-20 | 2.00E-22 | hypo2 | hypo3  | hypo2  | hypo2  |
| -0.28 | -0.18 | -0.4  | -0.38 | 8.40E-13 | 1.30E-07 | 6.70E-50 | 1.20E-42 | hypo1 | NA     | hypo2  | hypo2  |
| -0.5  | -0.08 | -0.55 | -0.44 | 1.40E-17 | 0.1      | 1.30E-42 | 5.30E-25 | hypo2 | NA     | hypo2  | hypo2  |

|       |       |       |       |          |          |           |          |       |       |        |       |
|-------|-------|-------|-------|----------|----------|-----------|----------|-------|-------|--------|-------|
| 0.07  | 0.06  | -0.34 | -0.42 | 0.033    | 0.11     | 7.60E-19  | 1.80E-19 | NA    | NA    | hypo2  | hypo2 |
| -0.13 | -0.24 | -0.42 | -0.54 | 0.0022   | 7.70E-07 | 8.40E-21  | 2.60E-27 | NA    | NA    | hypo2  | hypo2 |
| -0.24 | -0.06 | -0.34 | -0.38 | 7.90E-06 | 0.22     | 2.00E-10  | 2.10E-11 | NA    | NA    | hypo2  | hypo2 |
| -0.01 | 0.03  | -0.42 | -0.37 | 1        | 0.86     | 5.80E-15  | 5.00E-12 | NA    | NA    | hypo2  | hypo2 |
| 0.04  | 0.04  | -0.45 | -0.57 | 0.37     | 0.26     | 4.10E-24  | 1.50E-30 | NA    | NA    | hypo2  | hypo2 |
| 0.05  | 0.19  | -0.38 | -0.35 | 0.48     | 5.50E-05 | 3.90E-19  | 7.30E-15 | NA    | NA    | hypo2  | hypo2 |
| 0.16  | 0.15  | -0.45 | -0.42 | 1.20E-06 | 3.50E-07 | 2.20E-61  | 5.40E-41 | NA    | NA    | hypo2  | hypo2 |
| -0.13 | -0.04 | -0.36 | -0.37 | 0.016    | 0.49     | 2.00E-27  | 1.30E-20 | NA    | NA    | hypo2  | hypo2 |
| 0.21  | -0.15 | -0.44 | -0.52 | 5.90E-09 | 4.60E-05 | 1.80E-40  | 4.30E-66 | NA    | NA    | hypo2  | hypo2 |
| -0.21 | -0.05 | -0.44 | -0.58 | 0.00013  | 0.28     | 2.00E-12  | 1.00E-20 | NA    | NA    | hypo2  | hypo2 |
| -0.24 | -0.18 | -0.52 | -0.5  | 0.0098   | 0.033    | 3.30E-18  | 2.60E-17 | NA    | NA    | hypo2  | hypo2 |
| 0.07  | -0.03 | -0.51 | -0.42 | 0.15     | 0.66     | 2.90E-28  | 3.20E-12 | NA    | NA    | hypo2  | hypo2 |
| -0.1  | -0.08 | -0.55 | -0.45 | 0.036    | 0.061    | 1.40E-43  | 2.90E-30 | NA    | NA    | hypo2  | hypo2 |
| NA    | -0.08 | -0.43 | -0.49 | NA       | 1        | 6.60E-12  | 4.20E-12 | NA    | NA    | hypo2  | hypo2 |
| 0.08  | -0.07 | -0.42 | -0.38 | 0.16     | 0.13     | 7.40E-44  | 2.90E-28 | NA    | NA    | hypo2  | hypo2 |
| 0.03  | 0.02  | -0.56 | -0.55 | 0.33     | 0.46     | 3.00E-117 | 8.40E-93 | NA    | NA    | hypo2  | hypo2 |
| -0.22 | -0.18 | -0.45 | -0.38 | 0.0044   | 0.012    | 2.20E-28  | 4.90E-15 | NA    | NA    | hypo2  | hypo2 |
| 0.02  | 0     | -0.52 | -0.51 | 0.96     | 1        | 1.20E-15  | 8.50E-15 | NA    | NA    | hypo2  | hypo2 |
| 0     | -0.44 | -0.56 | -0.55 | 1        | 0.19     | 3.00E-20  | 8.90E-19 | NA    | NA    | hypo2  | hypo2 |
| -0.44 | -0.58 | -0.61 | -0.49 | 0.00016  | 8.60E-08 | 7.40E-22  | 7.60E-14 | NA    | NA    | hypo3  | hypo2 |
| -0.52 | -0.43 | -0.32 | -0.46 | 1.90E-17 | 8.90E-14 | 8.80E-09  | 6.40E-18 | hypo2 | hypo2 | NA     | hypo2 |
| -0.43 | -0.13 | -0.24 | -0.39 | 1.20E-09 | 0.071    | 6.50E-07  | 1.10E-15 | NA    | NA    | NA     | hypo2 |
| -0.08 | -0.08 | -0.15 | -0.34 | 0.065    | 0.037    | 0.00066   | 2.60E-11 | NA    | NA    | NA     | hypo2 |
| -0.06 | -0.04 | -0.3  | -0.41 | 0.46     | 0.68     | 2.70E-09  | 3.60E-13 | NA    | NA    | NA     | hypo2 |
| NA    | NA    | -0.37 | -0.5  | NA       | NA       | 3.40E-07  | 3.50E-10 | NA    | NA    | NA     | hypo2 |
| NA    | NA    | -0.89 | -0.93 | NA       | NA       | 3.30E-10  | 4.00E-15 | NA    | NA    | hypo3  | hypo3 |
| 0.39  | 0.39  | -0.66 | -0.69 | 0.017    | 0.011    | 6.60E-21  | 2.10E-21 | NA    | NA    | hypo3  | hypo3 |
| 0.12  | -0.11 | 0.24  | 0.02  | 0.32     | 0.14     | 1.10E-12  | 0.66     | NA    | NA    | hyper1 | NA    |
| 0.89  | NA    | 0.36  | NA    | 0.00087  | NA       | 1.00E-13  | NA       | NA    | NA    | hyper2 | NA    |
| 0.18  | -0.04 | 0.37  | 0.34  | 0.1      | 0.77     | 2.50E-12  | 8.90E-09 | NA    | NA    | hyper2 | NA    |

|       |       |       |       |          |          |          |          |        |        |        |    |
|-------|-------|-------|-------|----------|----------|----------|----------|--------|--------|--------|----|
| NA    | NA    | 0.34  | 0.2   | NA       | NA       | 2.30E-10 | 0.00017  | NA     | NA     | hyper2 | NA |
| 0.1   | 0.08  | 0.56  | 0.02  | 3.00E-05 | 5.10E-05 | 0        | 0.14     | NA     | NA     | hyper2 | NA |
| 0.04  | 0.1   | -0.07 | -0.02 | 0.0092   | 1.60E-11 | 2.20E-11 | 0.032    | NA     | hyper1 | hypo1  | NA |
| 0.28  | 0.4   | -0.21 | -0.04 | 4.30E-16 | 5.00E-31 | 1.00E-18 | 0.14     | hyper1 | hyper2 | hypo1  | NA |
| 0.36  | 0.37  | -0.15 | -0.06 | 1.60E-36 | 9.70E-46 | 9.70E-12 | 0.0098   | hyper2 | hyper2 | hypo1  | NA |
| 0.17  | 0.53  | -0.12 | -0.08 | 0.0019   | 1.60E-14 | 6.40E-10 | 2.10E-05 | NA     | hyper2 | hypo1  | NA |
| -0.16 | -0.41 | -0.32 | -0.23 | 0.069    | 1.90E-25 | 3.90E-22 | 2.00E-09 | NA     | hypo2  | hypo1  | NA |
| -0.06 | -0.01 | -0.06 | -0.01 | 0.00029  | 0.48     | 3.60E-12 | 0.56     | NA     | NA     | hypo1  | NA |
| -0.07 | 0.02  | -0.08 | -0.04 | 0.0026   | 0.36     | 1.20E-10 | 0.0088   | NA     | NA     | hypo1  | NA |
| 0.03  | 0.08  | -0.13 | -0.01 | 0.051    | 1.60E-05 | 3.60E-12 | 0.77     | NA     | NA     | hypo1  | NA |
| 0.05  | -0.01 | -0.14 | -0.05 | 0.11     | 0.72     | 7.70E-14 | 0.012    | NA     | NA     | hypo1  | NA |
| 0.03  | 0.06  | -0.13 | -0.07 | 0.33     | 0.042    | 6.20E-10 | 0.0042   | NA     | NA     | hypo1  | NA |
| 0.03  | 0.02  | -0.13 | 0.02  | 0.33     | 0.33     | 6.30E-17 | 0.4      | NA     | NA     | hypo1  | NA |
| -0.05 | -0.08 | -0.13 | -0.05 | 0.44     | 0.066    | 4.50E-10 | 0.061    | NA     | NA     | hypo1  | NA |
| 0.02  | 0.07  | -0.28 | -0.19 | 0.56     | 0.028    | 6.90E-23 | 2.10E-08 | NA     | NA     | hypo1  | NA |
| 0.01  | 0.09  | -0.1  | -0.07 | 0.82     | 0.00016  | 5.70E-10 | 3.00E-04 | NA     | NA     | hypo1  | NA |
| 0.16  | 0.17  | -0.14 | -0.07 | 1.90E-09 | 1.20E-09 | 2.10E-12 | 0.001    | NA     | NA     | hypo1  | NA |
| 0.1   | 0.04  | -0.13 | -0.05 | 0.043    | 0.17     | 1.60E-10 | 0.058    | NA     | NA     | hypo1  | NA |
| 0.03  | 0.04  | -0.1  | -0.05 | 0.2      | 0.081    | 9.30E-11 | 0.0054   | NA     | NA     | hypo1  | NA |
| -0.05 | -0.06 | -0.18 | -0.07 | 0.57     | 0.34     | 1.00E-11 | 0.028    | NA     | NA     | hypo1  | NA |
| -0.03 | 0     | -0.14 | -0.07 | 0.59     | 1        | 8.10E-10 | 0.013    | NA     | NA     | hypo1  | NA |
| NA    | NA    | -0.25 | -0.06 | NA       | NA       | 4.90E-10 | 0.44     | NA     | NA     | hypo1  | NA |
| 0.06  | 0.07  | -0.08 | -0.02 | 1.80E-05 | 2.80E-07 | 5.10E-13 | 0.12     | NA     | NA     | hypo1  | NA |
| -0.15 | -0.13 | -0.16 | -0.03 | 7.10E-05 | 7.00E-04 | 5.20E-10 | 0.42     | NA     | NA     | hypo1  | NA |
| 0.08  | 0.01  | -0.13 | -0.11 | 0.00023  | 0.58     | 7.50E-10 | 2.90E-05 | NA     | NA     | hypo1  | NA |
| 0.05  | 0.02  | -0.07 | -0.02 | 0.047    | 0.5      | 6.20E-11 | 0.061    | NA     | NA     | hypo1  | NA |
| -0.05 | -0.05 | -0.07 | -0.01 | 0.38     | 0.19     | 7.00E-11 | 0.63     | NA     | NA     | hypo1  | NA |
| 0.14  | 0.05  | -0.11 | -0.06 | 7.30E-07 | 0.019    | 2.80E-10 | 0.0018   | NA     | NA     | hypo1  | NA |
| 0.07  | 0.09  | -0.07 | -0.01 | 2.90E-05 | 1.20E-08 | 7.30E-11 | 0.64     | NA     | NA     | hypo1  | NA |
| 0.09  | 0.04  | -0.15 | -0.12 | 0.01     | 0.23     | 1.10E-15 | 9.70E-09 | NA     | NA     | hypo1  | NA |

|       |       |       |       |          |          |          |          |    |    |       |    |
|-------|-------|-------|-------|----------|----------|----------|----------|----|----|-------|----|
| 0.04  | 0.06  | -0.1  | 0     | 0.048    | 3.40E-05 | 1.70E-12 | 0.98     | NA | NA | hypo1 | NA |
| 0.02  | 0     | -0.1  | -0.04 | 0.97     | 1        | 1.50E-10 | 0.039    | NA | NA | hypo1 | NA |
| 0     | 0.03  | -0.06 | -0.02 | 1        | 0.008    | 2.60E-10 | 0.033    | NA | NA | hypo1 | NA |
| 0.03  | 0.06  | -0.06 | 0.02  | 0.06     | 0.0032   | 1.50E-10 | 0.015    | NA | NA | hypo1 | NA |
| 0.04  | 0.04  | -0.08 | -0.05 | 0.14     | 0.024    | 8.00E-10 | 6.00E-05 | NA | NA | hypo1 | NA |
| 0.03  | -0.03 | -0.14 | -0.08 | 0.65     | 0.55     | 2.10E-10 | 0.002    | NA | NA | hypo1 | NA |
| 0.04  | 0.01  | -0.07 | -0.03 | 0.019    | 0.47     | 1.90E-10 | 0.0057   | NA | NA | hypo1 | NA |
| 0.05  | 0.09  | -0.11 | -0.05 | 0.066    | 0.0015   | 1.20E-13 | 0.002    | NA | NA | hypo1 | NA |
| -0.02 | 0.03  | -0.11 | -0.03 | 0.47     | 0.57     | 8.60E-10 | 0.11     | NA | NA | hypo1 | NA |
| -0.24 | -0.15 | -0.11 | -0.04 | 2.00E-07 | 0.02     | 2.20E-10 | 0.0073   | NA | NA | hypo1 | NA |
| 0.22  | -0.01 | -0.12 | -0.1  | 3.30E-06 | 0.69     | 4.00E-15 | 2.90E-07 | NA | NA | hypo1 | NA |
| 0.07  | 0.03  | -0.1  | -0.04 | 0.00061  | 0.096    | 9.60E-18 | 0.0084   | NA | NA | hypo1 | NA |
| 0.15  | 0.1   | -0.09 | -0.04 | 0.00082  | 0.00051  | 2.50E-10 | 0.0069   | NA | NA | hypo1 | NA |
| 0.08  | 0.01  | -0.1  | -0.02 | 0.027    | 0.95     | 1.80E-10 | 0.26     | NA | NA | hypo1 | NA |
| -0.01 | -0.07 | -0.29 | -0.23 | 0.98     | 0.087    | 3.90E-11 | 3.20E-07 | NA | NA | hypo1 | NA |
| -0.02 | -0.16 | -0.14 | -0.03 | 0.88     | 0.093    | 9.00E-10 | 0.39     | NA | NA | hypo1 | NA |
| 0.01  | 0.11  | -0.08 | -0.03 | 0.91     | 0.00021  | 3.40E-10 | 0.05     | NA | NA | hypo1 | NA |
| 0.01  | 0.21  | -0.21 | -0.12 | 0.99     | 1.30E-05 | 1.70E-18 | 2.00E-04 | NA | NA | hypo1 | NA |
| -0.14 | -0.14 | -0.26 | -0.18 | 0.00013  | 7.60E-05 | 3.10E-16 | 1.30E-09 | NA | NA | hypo1 | NA |
| 0.16  | 0.07  | -0.09 | -0.03 | 0.00027  | 0.0021   | 1.60E-10 | 0.093    | NA | NA | hypo1 | NA |
| -0.19 | 0     | -0.14 | -0.11 | 0.0025   | 1        | 2.80E-16 | 1.30E-07 | NA | NA | hypo1 | NA |
| -0.29 | NA    | -0.24 | -0.03 | 0.043    | NA       | 2.20E-11 | 0.57     | NA | NA | hypo1 | NA |
| 0.06  | 0.06  | -0.11 | -0.03 | 0.045    | 0.011    | 2.20E-10 | 0.15     | NA | NA | hypo1 | NA |
| 0.05  | 0     | -0.07 | -0.01 | 0.046    | 0.91     | 1.50E-10 | 0.36     | NA | NA | hypo1 | NA |
| 0.07  | 0.07  | -0.1  | -0.03 | 0.047    | 0.064    | 3.30E-10 | 0.15     | NA | NA | hypo1 | NA |
| -0.1  | -0.06 | -0.14 | -0.12 | 0.076    | 0.51     | 2.70E-11 | 1.10E-06 | NA | NA | hypo1 | NA |
| -0.04 | 0.04  | -0.08 | 0.02  | 0.16     | 0.11     | 5.10E-12 | 0.16     | NA | NA | hypo1 | NA |
| 0.06  | -0.03 | -0.15 | -0.11 | 0.17     | 0.3      | 6.60E-10 | 9.90E-06 | NA | NA | hypo1 | NA |
| 0.07  | 0.15  | -0.22 | -0.03 | 0.29     | 0.02     | 2.70E-10 | 0.66     | NA | NA | hypo1 | NA |
| -0.02 | -0.03 | -0.11 | -0.01 | 0.83     | 0.44     | 2.50E-14 | 0.71     | NA | NA | hypo1 | NA |

|       |       |       |       |          |         |          |          |    |    |       |    |
|-------|-------|-------|-------|----------|---------|----------|----------|----|----|-------|----|
| 0.09  | 0.07  | -0.1  | -0.04 | 0.0013   | 0.0019  | 2.90E-10 | 0.063    | NA | NA | hypo1 | NA |
| 0.18  | 0.1   | -0.13 | -0.06 | 0.014    | 0.01    | 2.70E-11 | 0.0037   | NA | NA | hypo1 | NA |
| 0.02  | 0.03  | -0.1  | -0.03 | 0.64     | 0.33    | 1.70E-10 | 0.068    | NA | NA | hypo1 | NA |
| 0.1   | 0.04  | -0.06 | -0.01 | 1.30E-06 | 0.047   | 3.10E-10 | 0.29     | NA | NA | hypo1 | NA |
| 0.15  | 0.09  | -0.24 | -0.16 | 0.00036  | 0.008   | 2.50E-22 | 3.20E-09 | NA | NA | hypo1 | NA |
| 0.13  | 0.03  | -0.16 | -0.12 | 0.004    | 0.3     | 8.80E-12 | 7.90E-07 | NA | NA | hypo1 | NA |
| 0.05  | 0.04  | -0.09 | -0.03 | 0.022    | 0.047   | 7.90E-11 | 0.051    | NA | NA | hypo1 | NA |
| -0.08 | 0.01  | -0.3  | -0.16 | 0.057    | 0.97    | 2.30E-15 | 4.10E-05 | NA | NA | hypo1 | NA |
| -0.14 | -0.23 | -0.2  | -0.11 | 0.13     | 0.00098 | 4.60E-14 | 0.00039  | NA | NA | hypo1 | NA |
| 0.04  | 0.03  | -0.13 | -0.01 | 0.38     | 0.62    | 8.90E-14 | 0.56     | NA | NA | hypo1 | NA |
| 0.09  | -0.09 | -0.29 | -0.17 | 0.51     | 0.67    | 4.70E-11 | 0.0027   | NA | NA | hypo1 | NA |
| 0.19  | 0.01  | -0.27 | -0.24 | 0.62     | 0.88    | 2.20E-10 | 2.10E-07 | NA | NA | hypo1 | NA |
| -0.01 | 0.02  | -0.11 | -0.07 | 0.83     | 0.4     | 3.70E-12 | 0.00016  | NA | NA | hypo1 | NA |
| 0.11  | 0.01  | -0.3  | -0.13 | 0.9      | 1       | 5.30E-13 | 0.0086   | NA | NA | hypo1 | NA |
| 0.02  | 0.08  | -0.12 | -0.08 | 0.91     | 0.095   | 8.60E-11 | 0.0018   | NA | NA | hypo1 | NA |
| -0.1  | NA    | -0.22 | -0.09 | 1        | NA      | 2.60E-10 | 0.065    | NA | NA | hypo1 | NA |
| 0.03  | -0.01 | -0.13 | -0.09 | 1        | 0.96    | 4.70E-10 | 0.00017  | NA | NA | hypo1 | NA |
| 0.01  | 0.01  | -0.08 | -0.02 | 0.8      | 0.56    | 5.70E-10 | 0.2      | NA | NA | hypo1 | NA |
| 0     | 0.07  | -0.07 | -0.01 | 0.98     | 0.04    | 1.80E-11 | 0.71     | NA | NA | hypo1 | NA |
| 0.16  | -0.05 | -0.1  | -0.08 | 3.40E-07 | 0.031   | 1.60E-10 | 1.60E-07 | NA | NA | hypo1 | NA |
| 0.07  | 0.08  | -0.1  | -0.08 | 0.0068   | 0.0017  | 4.00E-10 | 2.10E-06 | NA | NA | hypo1 | NA |
| -0.02 | 0.01  | -0.07 | -0.01 | 0.33     | 0.69    | 2.00E-11 | 0.42     | NA | NA | hypo1 | NA |
| 0.1   | 0.02  | -0.26 | -0.16 | 0.34     | 0.73    | 2.10E-10 | 0.00057  | NA | NA | hypo1 | NA |
| -0.01 | 0.05  | -0.07 | -0.01 | 0.59     | 0.032   | 2.10E-11 | 0.63     | NA | NA | hypo1 | NA |
| -0.02 | 0.02  | -0.2  | -0.12 | 0.64     | 0.67    | 4.50E-14 | 0.00029  | NA | NA | hypo1 | NA |
| 0.01  | 0.02  | -0.12 | -0.06 | 0.72     | 0.34    | 6.40E-11 | 0.0062   | NA | NA | hypo1 | NA |
| -0.01 | -0.07 | -0.16 | -0.11 | 0.99     | 0.041   | 1.60E-20 | 1.80E-06 | NA | NA | hypo1 | NA |
| 0.09  | -0.01 | -0.18 | -0.05 | 2.40E-05 | 0.8     | 9.90E-43 | 0.00039  | NA | NA | hypo1 | NA |
| 0.12  | 0.12  | -0.1  | -0.02 | 0.0011   | 0.00082 | 8.90E-10 | 0.31     | NA | NA | hypo1 | NA |
| 0.11  | 0.01  | -0.15 | -0.16 | 0.0027   | 0.84    | 1.20E-10 | 1.70E-08 | NA | NA | hypo1 | NA |



|       |       |       |       |          |          |          |          |    |    |       |    |
|-------|-------|-------|-------|----------|----------|----------|----------|----|----|-------|----|
| 0.15  | 0.14  | -0.13 | -0.06 | 0.0029   | 0.0015   | 3.30E-19 | 0.00019  | NA | NA | hypo1 | NA |
| -0.04 | -0.07 | -0.1  | 0     | 0.21     | 0.0033   | 9.90E-11 | 1        | NA | NA | hypo1 | NA |
| -0.02 | -0.1  | -0.09 | -0.06 | 0.53     | 2.70E-05 | 1.60E-14 | 3.90E-05 | NA | NA | hypo1 | NA |
| 0.01  | -0.03 | -0.12 | -0.08 | 0.75     | 0.46     | 5.60E-18 | 6.70E-06 | NA | NA | hypo1 | NA |
| -0.01 | -0.08 | -0.12 | -0.1  | 0.9      | 0.0054   | 5.10E-12 | 4.10E-09 | NA | NA | hypo1 | NA |
| 0     | 0.07  | -0.06 | 0.02  | 0.91     | 0.00052  | 1.70E-10 | 0.14     | NA | NA | hypo1 | NA |
| 0.08  | 0.09  | -0.21 | -0.14 | 0.94     | 0.17     | 8.20E-13 | 0.00098  | NA | NA | hypo1 | NA |
| 0     | 0     | -0.06 | 0.01  | 0.95     | 0.89     | 7.70E-17 | 0.56     | NA | NA | hypo1 | NA |
| 0.02  | 0.04  | -0.16 | -0.09 | 1        | 0.43     | 3.70E-15 | 0.00015  | NA | NA | hypo1 | NA |
| 0.02  | -0.01 | -0.33 | -0.25 | 1        | 1        | 1.50E-13 | 7.70E-08 | NA | NA | hypo1 | NA |
| 0.16  | 0.29  | -0.14 | -0.11 | 0.00077  | 1.20E-07 | 2.50E-10 | 2.30E-06 | NA | NA | hypo1 | NA |
| 0.03  | 0.02  | -0.07 | -0.04 | 0.018    | 0.16     | 2.70E-16 | 1.50E-06 | NA | NA | hypo1 | NA |
| 0.41  | 0.05  | -0.23 | 0     | 1.30E-08 | 0.57     | 7.30E-10 | 1        | NA | NA | hypo1 | NA |
| 0.08  | 0.05  | -0.1  | -0.03 | 0.018    | 0.019    | 1.70E-23 | 0.0064   | NA | NA | hypo1 | NA |
| -0.25 | -0.34 | -0.31 | -0.16 | 0.14     | 0.027    | 5.20E-10 | 0.0045   | NA | NA | hypo1 | NA |
| -0.03 | -0.01 | -0.08 | -0.03 | 0.29     | 0.37     | 4.00E-12 | 0.017    | NA | NA | hypo1 | NA |
| 0.02  | 0.11  | -0.07 | 0     | 0.36     | 7.50E-07 | 8.10E-11 | 0.95     | NA | NA | hypo1 | NA |
| 0.09  | 0.03  | -0.26 | -0.19 | 0.48     | 0.8      | 5.50E-20 | 0.001    | NA | NA | hypo1 | NA |
| -0.01 | 0.02  | -0.09 | -0.01 | 0.8      | 0.49     | 7.90E-11 | 0.53     | NA | NA | hypo1 | NA |
| NA    | 0.06  | -0.27 | -0.22 | NA       | 0.37     | 1.60E-20 | 1.30E-09 | NA | NA | hypo1 | NA |
| 0.24  | 0.07  | -0.13 | -0.1  | 2.30E-06 | 0.07     | 4.60E-13 | 1.10E-05 | NA | NA | hypo1 | NA |
| -0.05 | -0.05 | -0.06 | -0.01 | 0.00012  | 1.60E-06 | 3.40E-16 | 0.19     | NA | NA | hypo1 | NA |
| -0.08 | 0.04  | -0.11 | -0.03 | 0.0011   | 0.32     | 8.60E-10 | 0.26     | NA | NA | hypo1 | NA |
| -0.15 | -0.14 | -0.16 | -0.1  | 0.047    | 0.019    | 1.50E-11 | 8.00E-04 | NA | NA | hypo1 | NA |
| -0.03 | -0.03 | -0.12 | -0.07 | 0.19     | 0.39     | 1.40E-15 | 0.00041  | NA | NA | hypo1 | NA |
| 0.02  | 0.01  | -0.11 | -0.09 | 0.3      | 0.77     | 2.40E-11 | 1.60E-06 | NA | NA | hypo1 | NA |
| -0.02 | 0.09  | -0.12 | -0.02 | 0.34     | 3.00E-04 | 5.90E-10 | 0.32     | NA | NA | hypo1 | NA |
| -0.06 | 0.4   | -0.18 | -0.14 | 0.58     | 2.40E-06 | 9.60E-18 | 9.20E-07 | NA | NA | hypo1 | NA |
| -0.01 | 0.02  | -0.06 | -0.01 | 0.63     | 0.12     | 6.30E-11 | 0.67     | NA | NA | hypo1 | NA |
| NA    | 0.29  | -0.29 | -0.17 | NA       | 0.2      | 2.80E-11 | 0.017    | NA | NA | hypo1 | NA |

|       |       |       |       |          |          |          |          |        |        |       |    |
|-------|-------|-------|-------|----------|----------|----------|----------|--------|--------|-------|----|
| 0.05  | 0.02  | -0.08 | 0     | 0.0011   | 0.15     | 5.10E-14 | 0.89     | NA     | NA     | hypo1 | NA |
| 0.12  | 0.05  | -0.1  | -0.05 | 0.0088   | 0.14     | 1.90E-10 | 0.0024   | NA     | NA     | hypo1 | NA |
| -0.1  | 0.01  | -0.12 | -0.1  | 0.014    | 0.88     | 1.70E-12 | 8.70E-07 | NA     | NA     | hypo1 | NA |
| 0.15  | 0     | -0.1  | -0.06 | 0.015    | 1        | 1.00E-09 | 0.00075  | NA     | NA     | hypo1 | NA |
| -0.07 | -0.18 | -0.31 | -0.27 | 0.31     | 0.0044   | 4.70E-11 | 3.50E-09 | NA     | NA     | hypo1 | NA |
| 0.03  | 0     | -0.14 | -0.12 | 0.73     | 1        | 2.70E-12 | 2.00E-07 | NA     | NA     | hypo1 | NA |
| -0.01 | -0.07 | -0.07 | -0.02 | 0.76     | 1.20E-05 | 6.00E-10 | 0.094    | NA     | NA     | hypo1 | NA |
| -0.06 | -0.09 | -0.18 | -0.09 | 0.86     | 0.32     | 9.80E-10 | 0.018    | NA     | NA     | hypo1 | NA |
| -0.05 | 0.85  | -0.19 | -0.19 | 0.96     | 0.0049   | 1.90E-11 | 2.10E-05 | NA     | NA     | hypo1 | NA |
| 0.66  | 0.57  | -0.37 | -0.3  | 4.70E-21 | 7.30E-17 | 1.90E-14 | 1.90E-07 | hyper3 | hyper2 | hypo2 | NA |
| 0.48  | 0.67  | -0.4  | -0.2  | 8.30E-12 | 4.30E-12 | 1.60E-17 | 0.00012  | hyper2 | hyper3 | hypo2 | NA |
| -0.61 | NA    | -0.43 | -0.34 | 5.00E-16 | NA       | 1.80E-13 | 3.60E-09 | hypo3  | NA     | hypo2 | NA |
| NA    | 0.02  | -0.39 | -0.28 | NA       | 0.86     | 5.70E-14 | 7.70E-07 | NA     | NA     | hypo2 | NA |
| -0.35 | -0.27 | -0.35 | -0.28 | 4.80E-06 | 0.00063  | 9.10E-14 | 4.40E-08 | NA     | NA     | hypo2 | NA |
| 0.15  | -0.03 | -0.34 | -0.17 | 0.74     | 1        | 5.30E-17 | 0.00037  | NA     | NA     | hypo2 | NA |
| 0.23  | 0.15  | -0.33 | -0.22 | 5.00E-06 | 0.004    | 1.00E-11 | 0.00015  | NA     | NA     | hypo2 | NA |
| NA    | 0.09  | -0.47 | -0.39 | NA       | 1        | 7.00E-11 | 0.0022   | NA     | NA     | hypo2 | NA |
| 0.25  | -0.11 | -0.49 | -0.37 | 0.024    | 1        | 1.30E-10 | 0.00052  | NA     | NA     | hypo2 | NA |
| 0.25  | 0.17  | 0.09  | 0.1   | 2.80E-24 | 2.20E-13 | 7.50E-06 | 4.70E-06 | hyper1 | hyper1 | NA    | NA |
| 0.18  | 0.16  | -0.01 | -0.01 | 2.10E-87 | 8.60E-77 | 0.0057   | 0.1      | hyper1 | hyper1 | NA    | NA |
| 0.14  | 0.16  | 0.02  | 0.06  | 4.90E-14 | 2.00E-19 | 0.21     | 1.10E-05 | hyper1 | hyper1 | NA    | NA |
| 0.24  | 0.18  | 0.04  | 0.06  | 8.60E-22 | 1.40E-18 | 0.087    | 0.0039   | hyper1 | hyper1 | NA    | NA |
| 0.14  | 0.13  | -0.05 | -0.02 | 7.10E-12 | 4.30E-15 | 0.00025  | 0.1      | hyper1 | hyper1 | NA    | NA |
| 0.3   | 0.21  | 0.03  | 0.06  | 1.80E-63 | 2.10E-37 | 0.14     | 0.001    | hyper1 | hyper1 | NA    | NA |
| 0.16  | 0.14  | -0.02 | 0.04  | 0        | 0        | 0.19     | 0.041    | hyper1 | hyper1 | NA    | NA |
| 0.27  | 0.24  | 0     | 0.05  | 2.10E-24 | 3.50E-24 | 1        | 0.0023   | hyper1 | hyper1 | NA    | NA |
| 0.14  | 0.11  | -0.02 | 0.02  | 6.00E-12 | 4.30E-14 | 0.051    | 0.14     | hyper1 | hyper1 | NA    | NA |
| 0.26  | 0.23  | -0.05 | 0.06  | 4.50E-12 | 8.70E-11 | 0.036    | 0.014    | hyper1 | hyper1 | NA    | NA |
| 0.1   | 0.1   | 0     | 0.04  | 3.90E-10 | 1.40E-13 | 0.93     | 0.036    | hyper1 | hyper1 | NA    | NA |
| 0.12  | 0.21  | -0.04 | 0.01  | 8.10E-13 | 3.00E-28 | 0.0017   | 0.35     | hyper1 | hyper1 | NA    | NA |

|       |      |       |       |          |          |          |          |        |        |    |    |
|-------|------|-------|-------|----------|----------|----------|----------|--------|--------|----|----|
| 0.24  | 0.23 | -0.01 | 0.07  | 5.30E-11 | 1.50E-10 | 0.76     | 0.00049  | hyper1 | hyper1 | NA | NA |
| 0.3   | 0.21 | -0.02 | -0.07 | 1.50E-10 | 3.60E-10 | 0.53     | 0.0038   | hyper1 | hyper1 | NA | NA |
| 0.35  | 0.18 | -0.05 | -0.01 | 3.10E-21 | 4.80E-11 | 0.011    | 0.55     | hyper2 | hyper1 | NA | NA |
| 0.35  | 0.29 | -0.06 | -0.02 | 1.90E-13 | 3.00E-11 | 0.15     | 0.88     | hyper2 | hyper1 | NA | NA |
| 0.69  | 0.31 | -0.05 | -0.01 | 4.30E-05 | 1.80E-11 | 0.027    | 0.78     | NA     | hyper1 | NA | NA |
| 0.1   | 0.21 | -0.06 | -0.02 | 6.20E-05 | 7.20E-18 | 4.90E-07 | 0.16     | NA     | hyper1 | NA | NA |
| 0.04  | 0.1  | -0.02 | 0.04  | 0.0059   | 1.00E-11 | 0.22     | 0.0058   | NA     | hyper1 | NA | NA |
| 0.12  | 0.3  | -0.06 | -0.02 | 0.013    | 3.50E-15 | 0.0058   | 0.32     | NA     | hyper1 | NA | NA |
| 0.07  | 0.27 | -0.08 | 0.04  | 0.014    | 8.20E-12 | 1.10E-09 | 0.043    | NA     | hyper1 | NA | NA |
| 0.07  | 0.29 | -0.05 | 0.02  | 0.026    | 2.40E-15 | 0.006    | 0.25     | NA     | hyper1 | NA | NA |
| 0.03  | 0.11 | -0.06 | 0     | 0.027    | 7.90E-10 | 2.40E-05 | 0.84     | NA     | hyper1 | NA | NA |
| 0.08  | 0.25 | -0.05 | 0.01  | 0.051    | 1.50E-10 | 0.00029  | 0.61     | NA     | hyper1 | NA | NA |
| 0.06  | 0.33 | -0.06 | 0.05  | 0.11     | 2.40E-18 | 0.00025  | 0.026    | NA     | hyper1 | NA | NA |
| 0.04  | 0.27 | 0.02  | 0.08  | 0.41     | 7.90E-15 | 0.28     | 9.50E-07 | NA     | hyper1 | NA | NA |
| -0.02 | 0.17 | -0.05 | -0.01 | 0.5      | 4.40E-10 | 0.00062  | 0.6      | NA     | hyper1 | NA | NA |
| 0.03  | 0.29 | -0.05 | 0.04  | 0.84     | 3.00E-14 | 0.0058   | 0.1      | NA     | hyper1 | NA | NA |
| 0.12  | 0.22 | -0.04 | 0.06  | 1.60E-06 | 1.50E-17 | 0.0055   | 9.10E-05 | NA     | hyper1 | NA | NA |
| 0.06  | 0.2  | 0     | 0.06  | 0.0031   | 3.80E-16 | 0.92     | 0.00081  | NA     | hyper1 | NA | NA |
| 0.07  | 0.2  | -0.01 | 0.02  | 0.01     | 2.10E-11 | 0.79     | 0.41     | NA     | hyper1 | NA | NA |
| 0.05  | 0.3  | 0.02  | 0.05  | 0.15     | 2.60E-29 | 0.41     | 0.053    | NA     | hyper1 | NA | NA |
| -0.03 | 0.21 | -0.06 | 0.02  | 0.27     | 6.00E-18 | 0.0015   | 0.38     | NA     | hyper1 | NA | NA |
| 0.21  | 0.24 | -0.12 | 0     | 5.10E-07 | 1.80E-13 | 6.30E-06 | 1        | NA     | hyper1 | NA | NA |
| 0.18  | 0.3  | -0.06 | -0.03 | 9.00E-04 | 3.00E-12 | 0.0033   | 0.24     | NA     | hyper1 | NA | NA |
| 0.06  | 0.17 | -0.03 | 0.04  | 0.0016   | 4.90E-21 | 0.01     | 0.00053  | NA     | hyper1 | NA | NA |
| 0.12  | 0.18 | -0.02 | 0.06  | 0.0049   | 6.80E-10 | 0.41     | 0.011    | NA     | hyper1 | NA | NA |
| 0.11  | 0.32 | -0.04 | -0.02 | 0.077    | 4.20E-10 | 0.13     | 0.49     | NA     | hyper1 | NA | NA |
| -0.03 | 0.27 | 0.06  | 0.03  | 0.5      | 8.40E-14 | 0.00038  | 0.042    | NA     | hyper1 | NA | NA |
| 0.1   | 0.17 | -0.02 | 0.01  | 7.10E-08 | 6.30E-17 | 0.066    | 0.56     | NA     | hyper1 | NA | NA |
| 0.09  | 0.14 | -0.04 | 0     | 8.30E-05 | 1.90E-11 | 0.014    | 0.87     | NA     | hyper1 | NA | NA |
| 0.04  | 0.19 | -0.02 | -0.01 | 0.019    | 5.60E-23 | 0.096    | 0.31     | NA     | hyper1 | NA | NA |

|       |      |       |       |          |          |          |          |    |        |    |    |
|-------|------|-------|-------|----------|----------|----------|----------|----|--------|----|----|
| 0.02  | 0.23 | -0.01 | 0.08  | 0.71     | 4.60E-14 | 0.63     | 1.20E-06 | NA | hyper1 | NA | NA |
| 0.04  | 0.23 | -0.06 | 0.01  | 0.78     | 3.50E-12 | 0.0082   | 0.67     | NA | hyper1 | NA | NA |
| 0.09  | 0.09 | -0.01 | -0.02 | 4.10E-06 | 1.30E-11 | 0.64     | 0.18     | NA | hyper1 | NA | NA |
| 0.14  | 0.2  | 0.04  | 0     | 0.0067   | 8.40E-11 | 0.26     | 1        | NA | hyper1 | NA | NA |
| 0.1   | 0.24 | -0.05 | 0.01  | 0.0082   | 8.50E-10 | 5.00E-04 | 0.48     | NA | hyper1 | NA | NA |
| 0.09  | 0.3  | -0.04 | 0.08  | 0.014    | 9.80E-13 | 0.1      | 0.013    | NA | hyper1 | NA | NA |
| 0.03  | 0.15 | -0.03 | 0     | 0.13     | 5.50E-15 | 0.0023   | 0.97     | NA | hyper1 | NA | NA |
| 0.03  | 0.16 | 0.01  | 0.02  | 0.18     | 2.30E-10 | 0.62     | 0.11     | NA | hyper1 | NA | NA |
| 0.03  | 0.17 | -0.03 | 0.01  | 0.27     | 2.60E-17 | 0.0097   | 0.27     | NA | hyper1 | NA | NA |
| -0.02 | 0.26 | -0.01 | 0.04  | 0.53     | 3.00E-10 | 0.64     | 0.00085  | NA | hyper1 | NA | NA |
| 0.25  | 0.25 | -0.06 | 0.08  | 6.50E-09 | 1.00E-10 | 0.011    | 0.0049   | NA | hyper1 | NA | NA |
| 0.2   | 0.18 | -0.01 | 0.02  | 6.00E-07 | 4.90E-12 | 0.49     | 0.25     | NA | hyper1 | NA | NA |
| 0.12  | 0.18 | -0.04 | -0.01 | 1.40E-06 | 4.50E-13 | 0.036    | 0.75     | NA | hyper1 | NA | NA |
| 0.08  | 0.18 | -0.02 | 0     | 0.0072   | 8.40E-11 | 0.16     | 1        | NA | hyper1 | NA | NA |
| 0.25  | 0.33 | -0.08 | -0.06 | 0.019    | 9.40E-12 | 0.00012  | 0.014    | NA | hyper1 | NA | NA |
| 0.15  | 0.25 | -0.03 | 0.02  | 0.026    | 4.10E-10 | 0.15     | 0.29     | NA | hyper1 | NA | NA |
| 0.03  | 0.18 | -0.03 | 0.02  | 0.17     | 4.20E-13 | 0.0057   | 0.26     | NA | hyper1 | NA | NA |
| 0.14  | 0.18 | -0.06 | -0.02 | 6.60E-07 | 2.10E-15 | 4.30E-07 | 0.25     | NA | hyper1 | NA | NA |
| 0.15  | 0.19 | -0.07 | 0.01  | 9.20E-06 | 5.80E-10 | 2.30E-06 | 0.69     | NA | hyper1 | NA | NA |
| 0.11  | 0.17 | -0.01 | 0.06  | 5.50E-05 | 1.10E-14 | 0.37     | 1.30E-07 | NA | hyper1 | NA | NA |
| 0.09  | 0.19 | -0.06 | 0.02  | 0.00074  | 8.10E-23 | 2.00E-07 | 0.22     | NA | hyper1 | NA | NA |
| 0.09  | 0.17 | -0.01 | 0.03  | 0.0016   | 9.10E-12 | 0.31     | 0.04     | NA | hyper1 | NA | NA |
| 0.07  | 0.23 | 0.01  | -0.02 | 0.0027   | 4.50E-10 | 0.6      | 0.36     | NA | hyper1 | NA | NA |
| 0.09  | 0.22 | -0.01 | 0.04  | 0.21     | 1.70E-11 | 0.52     | 0.032    | NA | hyper1 | NA | NA |
| 0.03  | 0.28 | -0.04 | -0.03 | 0.4      | 7.40E-27 | 0.039    | 0.18     | NA | hyper1 | NA | NA |
| 0     | 0.09 | -0.02 | 0.01  | 0.96     | 1.50E-12 | 0.0095   | 0.39     | NA | hyper1 | NA | NA |
| 0.22  | 0.22 | -0.05 | -0.03 | 0.00033  | 1.80E-11 | 1.00E-05 | 0.0089   | NA | hyper1 | NA | NA |
| 0.08  | 0.16 | -0.03 | -0.01 | 0.0012   | 1.50E-17 | 0.037    | 0.69     | NA | hyper1 | NA | NA |
| 0.06  | 0.25 | -0.06 | 0.01  | 0.13     | 1.20E-11 | 0.00066  | 0.54     | NA | hyper1 | NA | NA |
| 0.14  | 0.22 | -0.09 | 0     | 4.10E-06 | 9.00E-11 | 1.20E-05 | 1        | NA | hyper1 | NA | NA |

|       |      |       |       |          |          |          |          |    |        |    |    |
|-------|------|-------|-------|----------|----------|----------|----------|----|--------|----|----|
| 0.06  | 0.14 | -0.02 | 0     | 0.011    | 8.80E-10 | 0.18     | 0.88     | NA | hyper1 | NA | NA |
| 0.1   | 0.33 | -0.01 | 0.09  | 0.027    | 1.10E-14 | 0.9      | 0.0077   | NA | hyper1 | NA | NA |
| 0.21  | 0.28 | -0.06 | -0.05 | 5.90E-09 | 7.20E-13 | 1.10E-05 | 0.0011   | NA | hyper1 | NA | NA |
| 0.15  | 0.22 | -0.01 | 0.03  | 7.70E-05 | 4.70E-10 | 0.76     | 0.061    | NA | hyper1 | NA | NA |
| 0.07  | 0.12 | -0.01 | 0.02  | 9.40E-05 | 5.20E-13 | 0.27     | 0.025    | NA | hyper1 | NA | NA |
| 0.13  | 0.27 | -0.09 | 0     | 0.00013  | 2.40E-13 | 2.40E-07 | 0.98     | NA | hyper1 | NA | NA |
| 0.12  | 0.25 | -0.06 | 0.01  | 0.00033  | 1.10E-14 | 0.0034   | 0.64     | NA | hyper1 | NA | NA |
| 0.08  | 0.33 | -0.02 | 0.05  | 0.0051   | 2.90E-23 | 0.33     | 0.0088   | NA | hyper1 | NA | NA |
| 0.08  | 0.23 | -0.02 | 0.05  | 0.01     | 4.10E-14 | 0.24     | 0.027    | NA | hyper1 | NA | NA |
| 0.13  | 0.22 | -0.04 | -0.04 | 0.021    | 4.60E-13 | 0.053    | 0.048    | NA | hyper1 | NA | NA |
| 0.13  | 0.19 | -0.03 | 0.03  | 0.05     | 1.10E-10 | 0.06     | 0.05     | NA | hyper1 | NA | NA |
| 0.03  | 0.18 | -0.03 | 0.06  | 0.16     | 4.70E-14 | 0.014    | 8.60E-06 | NA | hyper1 | NA | NA |
| -0.16 | 0.22 | -0.03 | -0.02 | 1.80E-05 | 1.40E-13 | 0.12     | 0.25     | NA | hyper1 | NA | NA |
| 0.08  | 0.16 | -0.04 | 0.01  | 0.00024  | 2.70E-14 | 0.0066   | 0.46     | NA | hyper1 | NA | NA |
| 0.04  | 0.09 | -0.04 | -0.02 | 0.002    | 4.80E-10 | 0.00038  | 0.042    | NA | hyper1 | NA | NA |
| 0.03  | 0.1  | -0.02 | 0     | 0.011    | 1.80E-18 | 0.23     | 1        | NA | hyper1 | NA | NA |
| 0.06  | 0.32 | -0.08 | -0.05 | 0.15     | 3.30E-14 | 0.00012  | 0.05     | NA | hyper1 | NA | NA |
| -0.01 | 0.11 | -0.04 | 0.04  | 0.49     | 2.20E-10 | 0.002    | 0.00095  | NA | hyper1 | NA | NA |
| 0.16  | 0.15 | -0.04 | -0.03 | 5.30E-08 | 3.70E-13 | 0.0019   | 0.019    | NA | hyper1 | NA | NA |
| 0.12  | 0.23 | 0.02  | -0.01 | 2.20E-06 | 5.60E-17 | 0.57     | 0.85     | NA | hyper1 | NA | NA |
| 0.18  | 0.27 | -0.04 | 0.04  | 5.50E-06 | 6.00E-11 | 0.051    | 0.064    | NA | hyper1 | NA | NA |
| 0.21  | 0.29 | -0.14 | -0.13 | 0.00018  | 1.70E-10 | 0.0034   | 0.013    | NA | hyper1 | NA | NA |
| 0.05  | 0.11 | -0.02 | 0.03  | 0.0093   | 2.60E-11 | 0.091    | 0.017    | NA | hyper1 | NA | NA |
| 0.07  | 0.2  | -0.04 | -0.03 | 0.016    | 3.00E-12 | 0.049    | 0.085    | NA | hyper1 | NA | NA |
| 0.05  | 0.24 | -0.05 | -0.01 | 0.027    | 7.00E-14 | 0.0053   | 0.74     | NA | hyper1 | NA | NA |
| -0.01 | 0.09 | -0.05 | 0     | 0.58     | 6.30E-12 | 1.00E-09 | 0.86     | NA | hyper1 | NA | NA |
| 0.19  | 0.14 | 0.02  | 0.07  | 6.50E-08 | 1.30E-10 | 0.21     | 0.00092  | NA | hyper1 | NA | NA |
| 0.16  | 0.22 | -0.01 | 0.05  | 7.90E-06 | 5.50E-11 | 0.64     | 0.008    | NA | hyper1 | NA | NA |
| 0.07  | 0.15 | -0.02 | 0.01  | 0.00069  | 7.90E-10 | 0.049    | 0.46     | NA | hyper1 | NA | NA |
| 0.09  | 0.14 | -0.04 | 0.02  | 0.00087  | 1.20E-11 | 0.0082   | 0.31     | NA | hyper1 | NA | NA |

|       |      |       |       |          |          |          |          |        |        |    |    |
|-------|------|-------|-------|----------|----------|----------|----------|--------|--------|----|----|
| 0.04  | 0.09 | -0.03 | 0.01  | 0.0023   | 9.90E-12 | 0.012    | 0.34     | NA     | hyper1 | NA | NA |
| 0.09  | 0.13 | -0.04 | 0.04  | 0.0026   | 2.00E-11 | 0.0024   | 0.02     | NA     | hyper1 | NA | NA |
| 0.05  | 0.3  | -0.05 | 0.03  | 0.076    | 2.60E-12 | 0.00022  | 0.11     | NA     | hyper1 | NA | NA |
| 0.03  | 0.24 | -0.04 | 0.03  | 0.26     | 1.90E-10 | 0.028    | 0.12     | NA     | hyper1 | NA | NA |
| 0.06  | 0.28 | -0.1  | -0.03 | 0.31     | 8.50E-10 | 0.00027  | 0.21     | NA     | hyper1 | NA | NA |
| 0.16  | 0.16 | 0.02  | 0.1   | 2.90E-05 | 6.70E-10 | 0.22     | 2.40E-08 | NA     | hyper1 | NA | NA |
| 0.08  | 0.15 | -0.05 | 0     | 6.10E-05 | 1.10E-10 | 0.0028   | 0.84     | NA     | hyper1 | NA | NA |
| 0.21  | 0.29 | -0.02 | 0.04  | 0.0011   | 2.40E-10 | 0.41     | 0.11     | NA     | hyper1 | NA | NA |
| 0.03  | 0.13 | 0.04  | 0.03  | 0.057    | 9.30E-15 | 0.0016   | 0.015    | NA     | hyper1 | NA | NA |
| 0.02  | 0.18 | -0.03 | 0.11  | 0.36     | 7.10E-10 | 0.14     | 1.30E-06 | NA     | hyper1 | NA | NA |
| 0.02  | 0.2  | -0.06 | -0.03 | 0.48     | 1.50E-11 | 8.20E-06 | 0.019    | NA     | hyper1 | NA | NA |
| 0.08  | 0.17 | -0.01 | 0.02  | 2.10E-07 | 2.20E-28 | 0.96     | 0.79     | NA     | hyper1 | NA | NA |
| 0.13  | 0.13 | -0.04 | 0.02  | 2.60E-07 | 7.80E-10 | 0.0019   | 0.18     | NA     | hyper1 | NA | NA |
| 0.2   | 0.3  | -0.07 | -0.07 | 8.60E-05 | 1.00E-10 | 0.048    | 0.0093   | NA     | hyper1 | NA | NA |
| 0.12  | 0.23 | -0.05 | -0.01 | 0.0025   | 3.60E-11 | 0.013    | 0.57     | NA     | hyper1 | NA | NA |
| 0.14  | 0.25 | -0.02 | 0.02  | 0.0025   | 3.00E-10 | 0.21     | 0.34     | NA     | hyper1 | NA | NA |
| 0.1   | 0.32 | -0.04 | 0.01  | 0.011    | 3.50E-13 | 0.015    | 0.62     | NA     | hyper1 | NA | NA |
| 0.05  | 0.27 | -0.05 | -0.03 | 0.2      | 4.90E-14 | 0.039    | 0.27     | NA     | hyper1 | NA | NA |
| 0.04  | 0.24 | 0.07  | 0.1   | 0.03     | 3.20E-27 | 0.0023   | 2.40E-06 | NA     | hyper1 | NA | NA |
| -0.02 | 0.14 | -0.02 | -0.04 | 0.1      | 2.70E-29 | 0.0094   | 0.25     | NA     | hyper1 | NA | NA |
| 0.05  | 0.31 | 0.09  | 0.15  | 0.17     | 2.20E-18 | 0.023    | 0.00052  | NA     | hyper1 | NA | NA |
| 0.17  | 0.24 | -0.05 | 0.03  | 2.40E-09 | 2.70E-14 | 0.013    | 0.23     | NA     | hyper1 | NA | NA |
| 0.19  | 0.25 | 0.04  | 0.12  | 6.20E-08 | 4.50E-13 | 0.24     | 0.00041  | NA     | hyper1 | NA | NA |
| 0.12  | 0.16 | -0.02 | 0.04  | 3.30E-07 | 2.40E-12 | 0.038    | 0.002    | NA     | hyper1 | NA | NA |
| 0.1   | 0.23 | -0.02 | 0     | 7.70E-05 | 2.90E-16 | 0.15     | 0.76     | NA     | hyper1 | NA | NA |
| 0.05  | 0.3  | -0.02 | 0     | 0.093    | 2.00E-17 | 0.26     | 0.84     | NA     | hyper1 | NA | NA |
| -0.02 | 0.12 | 0.01  | 0.01  | 0.14     | 1.50E-18 | 0.52     | 0.52     | NA     | hyper1 | NA | NA |
| -0.01 | 0.18 | 0.03  | 0.01  | 0.5      | 1.10E-13 | 0.071    | 0.36     | NA     | hyper1 | NA | NA |
| 0.01  | 0.18 | -0.02 | 0     | 0.54     | 6.00E-11 | 0.23     | 0.98     | NA     | hyper1 | NA | NA |
| 0.24  | 0.39 | -0.01 | 0.18  | 1.60E-14 | 1.90E-35 | 0.77     | 8.10E-08 | hyper1 | hyper2 | NA | NA |

|       |      |       |       |          |          |          |          |        |        |    |    |
|-------|------|-------|-------|----------|----------|----------|----------|--------|--------|----|----|
| 0.25  | 0.47 | -0.05 | 0.22  | 7.00E-16 | 2.60E-48 | 0.35     | 0.0033   | hyper1 | hyper2 | NA | NA |
| 0.28  | 0.37 | 0.16  | 0.18  | 1.80E-13 | 4.10E-24 | 8.20E-06 | 5.10E-08 | hyper1 | hyper2 | NA | NA |
| 0.25  | 0.5  | -0.15 | -0.07 | 4.20E-11 | 2.70E-12 | 3.80E-08 | 0.011    | hyper1 | hyper2 | NA | NA |
| 0.47  | 0.42 | -0.01 | 0.03  | 1.60E-51 | 7.60E-37 | 0.56     | 0.3      | hyper2 | hyper2 | NA | NA |
| 0.34  | 0.46 | -0.03 | 0.14  | 1.60E-28 | 3.10E-61 | 0.1      | 1.70E-08 | hyper2 | hyper2 | NA | NA |
| 0.54  | 0.42 | 0.16  | 0.26  | 4.50E-17 | 2.70E-13 | 0.00051  | 4.00E-08 | hyper2 | hyper2 | NA | NA |
| 0.44  | 0.44 | -0.28 | -0.24 | 1.60E-18 | 8.70E-19 | 1.50E-09 | 3.30E-07 | hyper2 | hyper2 | NA | NA |
| 0.6   | 0.55 | -0.29 | -0.19 | 1.60E-10 | 2.60E-10 | 2.20E-07 | 0.00042  | hyper2 | hyper2 | NA | NA |
| 0.47  | 0.49 | 0.16  | 0.21  | 8.60E-11 | 2.40E-12 | 1.00E-06 | 8.50E-05 | hyper2 | hyper2 | NA | NA |
| 0.41  | 0.46 | -0.01 | 0.06  | 4.70E-57 | 3.30E-80 | 0.46     | 0.0029   | hyper2 | hyper2 | NA | NA |
| 0.45  | 0.42 | -0.01 | 0.09  | 2.20E-16 | 5.40E-17 | 0.88     | 0.011    | hyper2 | hyper2 | NA | NA |
| 0.46  | 0.39 | 0.06  | 0.09  | 1.60E-20 | 7.40E-21 | 0.055    | 0.022    | hyper2 | hyper2 | NA | NA |
| 0.43  | 0.43 | -0.09 | -0.06 | 1.40E-13 | 4.30E-13 | 0.0023   | 0.11     | hyper2 | hyper2 | NA | NA |
| 0.59  | 0.48 | 0.04  | 0.1   | 1.40E-22 | 2.50E-17 | 0.55     | 0.071    | hyper2 | hyper2 | NA | NA |
| 0.38  | 0.36 | -0.05 | 0     | 6.60E-47 | 1.20E-39 | 0.00025  | 0.85     | hyper2 | hyper2 | NA | NA |
| 0.42  | 0.45 | -0.08 | 0     | 1.30E-44 | 1.80E-58 | 0.028    | 0.99     | hyper2 | hyper2 | NA | NA |
| 0.27  | 0.33 | -0.13 | 0.01  | 2.00E-08 | 7.50E-12 | 0.0043   | 0.88     | NA     | hyper2 | NA | NA |
| 0.27  | 0.52 | -0.04 | -0.04 | 1.20E-06 | 1.30E-11 | 0.052    | 0.058    | NA     | hyper2 | NA | NA |
| 0.14  | 0.33 | -0.03 | 0     | 0.02     | 7.90E-10 | 0.21     | 0.97     | NA     | hyper2 | NA | NA |
| 0.15  | 0.45 | -0.01 | 0.1   | 0.11     | 1.50E-11 | 0.85     | 0.00011  | NA     | hyper2 | NA | NA |
| 0.05  | 0.41 | -0.01 | 0.01  | 0.44     | 9.10E-14 | 0.97     | 0.79     | NA     | hyper2 | NA | NA |
| 0.07  | 0.58 | -0.01 | -0.01 | 0.15     | 9.90E-10 | 0.74     | 0.85     | NA     | hyper2 | NA | NA |
| -0.04 | 0.38 | -0.03 | 0.03  | 0.28     | 2.10E-14 | 0.093    | 0.19     | NA     | hyper2 | NA | NA |
| 0.07  | 0.58 | 0.04  | -0.03 | 0.45     | 2.60E-11 | 0.16     | 0.45     | NA     | hyper2 | NA | NA |
| 0.58  | 0.53 | -0.1  | -0.21 | 5.80E-07 | 2.90E-10 | 0.054    | 2.00E-04 | NA     | hyper2 | NA | NA |
| 0     | 0.4  | -0.04 | -0.02 | 1        | 6.30E-11 | 0.18     | 0.57     | NA     | hyper2 | NA | NA |
| 0.1   | 0.46 | -0.07 | -0.06 | 0.25     | 6.30E-11 | 0.13     | 0.055    | NA     | hyper2 | NA | NA |
| 0.09  | 0.42 | 0.01  | 0.04  | 0.056    | 2.30E-13 | 0.62     | 0.17     | NA     | hyper2 | NA | NA |
| -0.01 | 0.59 | -0.02 | 0     | 1        | 1.60E-11 | 0.69     | 1        | NA     | hyper2 | NA | NA |
| 0.37  | 0.43 | -0.16 | -0.17 | 1.30E-08 | 6.40E-14 | 2.30E-05 | 1.30E-05 | NA     | hyper2 | NA | NA |

|       |      |       |       |          |          |          |          |        |        |    |    |
|-------|------|-------|-------|----------|----------|----------|----------|--------|--------|----|----|
| 0.2   | 0.5  | -0.04 | 0.05  | 0.099    | 8.10E-22 | 0.35     | 0.29     | NA     | hyper2 | NA | NA |
| 0.18  | 0.5  | 0.02  | 0.03  | 1.00E-07 | 3.10E-24 | 0.5      | 0.23     | NA     | hyper2 | NA | NA |
| 0.17  | 0.34 | -0.03 | -0.04 | 7.20E-05 | 4.20E-15 | 0.21     | 0.18     | NA     | hyper2 | NA | NA |
| 0.06  | 0.6  | 0.03  | 0.11  | 0.18     | 2.60E-10 | 0.42     | 0.0085   | NA     | hyper2 | NA | NA |
| 0.08  | 0.46 | -0.1  | 0.13  | 0.2      | 5.00E-11 | 0.0057   | 0.0033   | NA     | hyper2 | NA | NA |
| 0.44  | 0.4  | 0.05  | 0.11  | 0.26     | 1.70E-10 | 0.052    | 0.00015  | NA     | hyper2 | NA | NA |
| -0.07 | 0.6  | 0     | 0.01  | 0.75     | 8.00E-10 | 1        | 0.75     | NA     | hyper2 | NA | NA |
| -0.2  | 0.43 | -0.07 | -0.01 | 6.60E-05 | 9.80E-10 | 0.0066   | 0.79     | NA     | hyper2 | NA | NA |
| 0.47  | 0.53 | -0.07 | 0.22  | 4.90E-09 | 6.70E-11 | 0.099    | 1.30E-06 | NA     | hyper2 | NA | NA |
| 0.35  | 0.51 | -0.06 | 0.16  | 5.90E-08 | 1.80E-17 | 0.16     | 0.0015   | NA     | hyper2 | NA | NA |
| 0.25  | 0.41 | -0.01 | 0.09  | 0.00018  | 7.80E-10 | 0.85     | 0.018    | NA     | hyper2 | NA | NA |
| 0.32  | 0.47 | -0.01 | 0.07  | 7.40E-05 | 3.30E-10 | 0.75     | 0.024    | NA     | hyper2 | NA | NA |
| 0     | 0.34 | -0.03 | 0.01  | 1        | 5.20E-14 | 0.21     | 0.59     | NA     | hyper2 | NA | NA |
| 0.36  | 0.4  | -0.08 | 0.02  | 3.10E-09 | 2.60E-10 | 0.0052   | 0.73     | NA     | hyper2 | NA | NA |
| 0.01  | 0.42 | -0.12 | -0.07 | 1        | 3.40E-12 | 0.00013  | 0.0012   | NA     | hyper2 | NA | NA |
| 0.03  | 0.4  | -0.09 | -0.07 | 0.65     | 3.70E-15 | 1.40E-05 | 0.007    | NA     | hyper2 | NA | NA |
| 0.04  | 0.53 | 0.01  | 0.02  | 0.68     | 2.40E-10 | 0.87     | 0.56     | NA     | hyper2 | NA | NA |
| 0.02  | 0.57 | -0.02 | 0.03  | 0.99     | 1.90E-11 | 0.4      | 0.39     | NA     | hyper2 | NA | NA |
| 0.88  | 0.63 | -0.08 | 0.38  | 1.30E-15 | 3.20E-11 | 0.51     | 1.60E-05 | hyper3 | hyper3 | NA | NA |
| 0.07  | 0.77 | -0.05 | 0.16  | 0.4      | 2.70E-10 | 0.19     | 0.00034  | NA     | hyper3 | NA | NA |
| NA    | 0.85 | -0.01 | 0.01  | NA       | 1.70E-10 | 0.97     | 1        | NA     | hyper3 | NA | NA |
| 0.07  | 0.75 | -0.01 | -0.11 | 1        | 1.10E-13 | 1        | 0.097    | NA     | hyper3 | NA | NA |
| 0.11  | 0.86 | -0.05 | -0.04 | 0.019    | 2.00E-17 | 0.014    | 0.083    | NA     | hyper3 | NA | NA |
| -0.08 | 0.68 | -0.04 | 0     | 0.39     | 4.30E-10 | 0.14     | 1        | NA     | hyper3 | NA | NA |
| -0.07 | 0.85 | 0.03  | 0.03  | 0.25     | 1.20E-11 | 0.18     | 0.21     | NA     | hyper3 | NA | NA |
| 0.25  | 0.85 | -0.01 | 0.22  | 0.00085  | 7.80E-12 | 0.91     | 2.30E-05 | NA     | hyper3 | NA | NA |
| 0.22  | 0.7  | 0.29  | 0.34  | 0.014    | 7.80E-10 | 0.0093   | 0.0019   | NA     | hyper3 | NA | NA |
| 0.13  | 0.7  | 0.05  | -0.02 | 0.097    | 4.90E-11 | 0.25     | 0.53     | NA     | hyper3 | NA | NA |
| -0.04 | 0.75 | -0.02 | 0.05  | 0.12     | 0        | 0.25     | 0.00018  | NA     | hyper3 | NA | NA |
| 0.44  | 0.94 | -0.13 | -0.11 | 8.30E-06 | 7.80E-12 | 5.80E-05 | 0.0067   | NA     | hyper3 | NA | NA |



|       |       |       |       |          |          |          |          |        |       |    |    |
|-------|-------|-------|-------|----------|----------|----------|----------|--------|-------|----|----|
| -0.23 | -0.32 | -0.16 | -0.12 | 5.60E-10 | 7.40E-16 | 1.00E-04 | 0.0083   | hypo1  | hypo1 | NA | NA |
| -0.19 | -0.19 | -0.03 | 0.01  | 2.80E-13 | 1.80E-11 | 0.032    | 0.42     | hypo1  | hypo1 | NA | NA |
| -0.12 | -0.15 | -0.02 | -0.02 | 3.00E-04 | 1.30E-11 | 0.25     | 0.34     | NA     | hypo1 | NA | NA |
| -0.08 | -0.1  | -0.05 | 0.05  | 7.50E-08 | 5.70E-12 | 0.03     | 0.088    | NA     | hypo1 | NA | NA |
| -0.43 | -0.5  | -0.15 | 0.04  | 2.30E-12 | 9.60E-20 | 0.0026   | 0.58     | hypo2  | hypo2 | NA | NA |
| -0.5  | -0.58 | -0.17 | -0.09 | 1.50E-10 | 1.80E-21 | 3.70E-05 | 0.034    | hypo2  | hypo2 | NA | NA |
| -0.42 | -0.37 | 0.06  | 0.16  | 6.00E-22 | 3.30E-15 | 0.15     | 0.00011  | hypo2  | hypo2 | NA | NA |
| -0.39 | -0.38 | -0.1  | 0.08  | 2.40E-33 | 3.30E-26 | 0.0016   | 0.021    | hypo2  | hypo2 | NA | NA |
| -0.63 | -0.58 | 0.02  | -0.05 | 1.30E-24 | 5.10E-24 | 0.82     | 0.32     | hypo3  | hypo2 | NA | NA |
| -0.79 | -0.46 | -0.08 | -0.05 | 3.20E-27 | 3.60E-12 | 0.019    | 0.14     | hypo3  | hypo2 | NA | NA |
| -0.05 | -0.35 | -0.05 | -0.05 | 0.43     | 3.70E-11 | 0.28     | 0.15     | NA     | hypo2 | NA | NA |
| -0.07 | -0.43 | -0.04 | -0.06 | 0.59     | 2.80E-31 | 0.19     | 0.013    | NA     | hypo2 | NA | NA |
| -0.48 | -0.48 | -0.18 | -0.37 | 1.30E-09 | 6.40E-12 | 0.0084   | 3.10E-07 | NA     | hypo2 | NA | NA |
| -0.65 | -0.64 | -0.21 | -0.12 | 3.80E-31 | 3.00E-22 | 2.20E-07 | 0.0056   | hypo3  | hypo3 | NA | NA |
| 0.2   | 0.06  | -0.12 | -0.07 | 2.20E-11 | 0.013    | 1.50E-07 | 0.031    | hyper1 | NA    | NA | NA |
| 0.17  | 0.01  | -0.06 | 0.03  | 1.40E-12 | 0.46     | 9.80E-05 | 0.061    | hyper1 | NA    | NA | NA |
| 0.18  | 0     | -0.03 | 0     | 2.70E-12 | 1        | 0.0043   | 0.9      | hyper1 | NA    | NA | NA |
| 0.26  | 0.25  | -0.05 | -0.01 | 9.20E-10 | 1.80E-06 | 0.0022   | 0.75     | hyper1 | NA    | NA | NA |
| 0.26  | 0.03  | -0.01 | 0.04  | 4.60E-14 | 0.26     | 0.7      | 0.0016   | hyper1 | NA    | NA | NA |
| 0.15  | 0.13  | -0.12 | -0.03 | 3.00E-12 | 1.30E-09 | 1.80E-09 | 0.12     | hyper1 | NA    | NA | NA |
| 0.32  | 0.06  | -0.08 | -0.01 | 1.10E-10 | 0.074    | 0.00016  | 0.85     | hyper1 | NA    | NA | NA |
| 0.19  | 0.12  | -0.03 | 0.01  | 8.50E-13 | 3.40E-09 | 0.015    | 0.45     | hyper1 | NA    | NA | NA |
| 0.26  | 0.17  | -0.02 | 0.09  | 5.10E-11 | 1.80E-05 | 0.095    | 5.80E-06 | hyper1 | NA    | NA | NA |
| 0.14  | -0.01 | 0.02  | 0.08  | 6.90E-11 | 0.84     | 0.22     | 8.50E-05 | hyper1 | NA    | NA | NA |
| 0.3   | 0.16  | -0.01 | 0.14  | 1.00E-10 | 5.40E-06 | 0.63     | 2.10E-07 | hyper1 | NA    | NA | NA |
| 0.18  | 0.07  | -0.04 | 0.04  | 1.60E-10 | 0.0061   | 0.00021  | 0.0029   | hyper1 | NA    | NA | NA |
| 0.14  | 0.03  | -0.01 | -0.01 | 1.70E-15 | 0.0012   | 0.24     | 0.08     | hyper1 | NA    | NA | NA |
| 0.31  | 0.17  | -0.02 | -0.02 | 5.30E-14 | 1.50E-05 | 0.39     | 0.31     | hyper1 | NA    | NA | NA |
| 0.18  | 0.03  | -0.04 | 0.01  | 8.30E-14 | 0.015    | 0.012    | 0.55     | hyper1 | NA    | NA | NA |
| 0.22  | 0.24  | -0.04 | -0.02 | 5.10E-11 | 1.30E-05 | 0.095    | 0.5      | hyper1 | NA    | NA | NA |

|      |       |       |       |          |          |          |          |        |    |    |    |
|------|-------|-------|-------|----------|----------|----------|----------|--------|----|----|----|
| 0.13 | 0.09  | -0.06 | 0.01  | 6.20E-10 | 8.20E-07 | 1.70E-05 | 0.71     | hyper1 | NA | NA | NA |
| 0.32 | 0.19  | -0.05 | 0.08  | 7.30E-10 | 1.40E-05 | 0.0098   | 0.00029  | hyper1 | NA | NA | NA |
| 0.18 | 0.05  | -0.05 | -0.04 | 1.60E-12 | 0.0021   | 3.30E-05 | 2.90E-05 | hyper1 | NA | NA | NA |
| 0.22 | 0     | -0.03 | 0     | 3.60E-12 | 0.93     | 0.12     | 1        | hyper1 | NA | NA | NA |
| 0.19 | 0.04  | -0.03 | 0.01  | 7.20E-10 | 0.073    | 0.11     | 0.63     | hyper1 | NA | NA | NA |
| 0.28 | 0.11  | -0.05 | -0.03 | 2.10E-31 | 6.30E-06 | 0.0023   | 0.069    | hyper1 | NA | NA | NA |
| 0.19 | -0.01 | -0.03 | 0     | 1.20E-10 | 0.71     | 0.0089   | 0.89     | hyper1 | NA | NA | NA |
| 0.27 | 0.07  | -0.07 | -0.02 | 7.80E-14 | 0.00012  | 7.10E-06 | 0.32     | hyper1 | NA | NA | NA |
| 0.17 | 0.06  | -0.01 | 0.03  | 2.90E-14 | 0.00012  | 0.42     | 0.0018   | hyper1 | NA | NA | NA |
| 0.2  | 0.02  | -0.04 | 0.02  | 4.30E-15 | 0.29     | 0.00095  | 0.081    | hyper1 | NA | NA | NA |
| 0.22 | 0.07  | -0.04 | 0.03  | 3.40E-17 | 0.00012  | 3.50E-06 | 0.0043   | hyper1 | NA | NA | NA |
| 0.26 | 0.09  | -0.05 | 0     | 2.30E-10 | 0.0083   | 0.0037   | 1        | hyper1 | NA | NA | NA |
| 0.3  | 0.03  | -0.03 | 0.06  | 2.30E-12 | 0.059    | 0.039    | 1.40E-05 | hyper1 | NA | NA | NA |
| 0.15 | 0.02  | 0.01  | 0.04  | 3.00E-10 | 0.18     | 0.31     | 0.0054   | hyper1 | NA | NA | NA |
| 0.22 | 0.04  | -0.04 | -0.02 | 2.90E-21 | 0.061    | 0.024    | 0.36     | hyper1 | NA | NA | NA |
| 0.19 | 0.09  | -0.01 | 0.01  | 6.30E-10 | 9.90E-05 | 0.53     | 0.57     | hyper1 | NA | NA | NA |
| 0.24 | 0.16  | 0.06  | 0.07  | 1.20E-15 | 4.10E-09 | 0.0014   | 0.079    | hyper1 | NA | NA | NA |
| 0.16 | 0.05  | -0.04 | 0     | 5.80E-14 | 0.001    | 0.00032  | 0.67     | hyper1 | NA | NA | NA |
| 0.14 | 0.05  | -0.01 | 0.01  | 6.50E-13 | 0.0044   | 0.52     | 0.55     | hyper1 | NA | NA | NA |
| 0.22 | 0.04  | -0.04 | 0.05  | 2.40E-12 | 0.12     | 0.0084   | 0.009    | hyper1 | NA | NA | NA |
| 0.22 | 0.19  | 0.17  | 0.34  | 2.20E-10 | 7.30E-08 | 9.60E-08 | 3.30E-06 | hyper1 | NA | NA | NA |
| 0.27 | -0.01 | -0.04 | 0     | 4.50E-10 | 0.59     | 0.0046   | 0.99     | hyper1 | NA | NA | NA |
| 0.24 | 0.04  | -0.02 | 0.01  | 3.20E-21 | 0.04     | 0.24     | 0.86     | hyper1 | NA | NA | NA |
| 0.14 | 0.09  | -0.03 | 0.01  | 3.00E-15 | 3.70E-08 | 0.0013   | 0.17     | hyper1 | NA | NA | NA |
| 0.29 | 0.23  | -0.02 | 0.01  | 4.20E-12 | 1.20E-09 | 0.35     | 0.87     | hyper1 | NA | NA | NA |
| 0.15 | 0.1   | -0.04 | 0.02  | 3.10E-11 | 3.70E-09 | 0.00033  | 0.14     | hyper1 | NA | NA | NA |
| 0.29 | 0.18  | -0.07 | 0.02  | 9.20E-11 | 5.30E-07 | 4.50E-05 | 0.45     | hyper1 | NA | NA | NA |
| 0.26 | 0.02  | -0.05 | -0.07 | 2.50E-10 | 0.38     | 0.041    | 0.0016   | hyper1 | NA | NA | NA |
| 0.22 | 0.08  | -0.06 | 0.01  | 5.30E-10 | 0.0067   | 9.50E-06 | 0.52     | hyper1 | NA | NA | NA |
| 0.26 | 0.09  | -0.06 | -0.07 | 7.30E-10 | 0.0035   | 0.055    | 0.055    | hyper1 | NA | NA | NA |

|      |       |       |       |          |          |          |          |        |    |    |    |
|------|-------|-------|-------|----------|----------|----------|----------|--------|----|----|----|
| 0.21 | 0.16  | -0.01 | -0.01 | 9.80E-10 | 5.80E-07 | 0.56     | 0.49     | hyper1 | NA | NA | NA |
| 0.3  | 0.06  | -0.02 | 0.03  | 1.90E-10 | 0.077    | 0.31     | 0.28     | hyper1 | NA | NA | NA |
| 0.2  | 0.06  | 0.05  | 0.02  | 1.40E-23 | 0.0011   | 0.0041   | 0.24     | hyper1 | NA | NA | NA |
| 0.12 | -0.01 | -0.04 | 0.01  | 2.50E-12 | 0.89     | 9.70E-05 | 0.31     | hyper1 | NA | NA | NA |
| 0.18 | 0.01  | -0.07 | -0.07 | 3.50E-10 | 0.73     | 0.00013  | 0.00054  | hyper1 | NA | NA | NA |
| 0.18 | 0.03  | -0.03 | 0.02  | 5.70E-10 | 0.13     | 0.0018   | 0.15     | hyper1 | NA | NA | NA |
| 0.58 | 0.12  | 0.06  | 0.21  | 3.20E-42 | 0.00058  | 0.24     | 4.80E-06 | hyper2 | NA | NA | NA |
| 0.4  | 0.1   | -0.17 | -0.07 | 3.80E-18 | 0.039    | 6.50E-09 | 0.035    | hyper2 | NA | NA | NA |
| 0.43 | 0.12  | -0.07 | -0.01 | 2.30E-10 | 0.00059  | 0.0014   | 0.93     | hyper2 | NA | NA | NA |
| 0.44 | -0.02 | -0.03 | 0.04  | 3.50E-11 | 0.59     | 0.19     | 0.19     | hyper2 | NA | NA | NA |
| 0.56 | 0.04  | -0.09 | -0.04 | 1.80E-17 | 0.11     | 6.40E-05 | 0.11     | hyper2 | NA | NA | NA |
| 0.33 | 0.13  | -0.05 | -0.03 | 8.10E-12 | 0.0052   | 0.0061   | 0.17     | hyper2 | NA | NA | NA |
| 0.47 | 0.02  | 0.03  | 0.06  | 2.80E-11 | 0.7      | 0.17     | 0.0019   | hyper2 | NA | NA | NA |
| 0.45 | 0.18  | -0.05 | -0.03 | 5.20E-56 | 5.80E-06 | 0.11     | 0.32     | hyper2 | NA | NA | NA |
| 0.36 | 0.04  | -0.05 | 0.17  | 1.90E-21 | 0.27     | 0.027    | 1.10E-07 | hyper2 | NA | NA | NA |
| 0.45 | 0.07  | -0.05 | 0.02  | 8.00E-10 | 0.049    | 0.029    | 0.4      | hyper2 | NA | NA | NA |
| 0.35 | 0.04  | -0.03 | 0.02  | 2.90E-10 | 0.2      | 0.034    | 0.23     | hyper2 | NA | NA | NA |
| 0.47 | 0.01  | -0.04 | -0.04 | 7.30E-20 | 0.82     | 0.23     | 0.22     | hyper2 | NA | NA | NA |
| 0.55 | 0.84  | -0.07 | 0.13  | 2.00E-10 | 0.031    | 0.24     | 0.13     | hyper2 | NA | NA | NA |
| 0.47 | 0.15  | -0.03 | 0.02  | 1.80E-14 | 5.50E-05 | 0.082    | 0.3      | hyper2 | NA | NA | NA |
| 0.34 | 0.07  | -0.07 | 0     | 3.70E-11 | 0.021    | 0.00067  | 1        | hyper2 | NA | NA | NA |
| 0.53 | 0.09  | -0.04 | -0.01 | 4.30E-11 | 0.0053   | 0.038    | 0.55     | hyper2 | NA | NA | NA |
| 0.44 | 0     | -0.09 | 0.08  | 5.20E-15 | 1        | 0.027    | 0.052    | hyper2 | NA | NA | NA |
| 0.51 | 0.26  | -0.03 | 0.06  | 1.00E-10 | 4.00E-06 | 0.21     | 0.074    | hyper2 | NA | NA | NA |
| 0.54 | 0.15  | -0.07 | 0.23  | 4.10E-33 | 3.00E-04 | 0.091    | 6.20E-07 | hyper2 | NA | NA | NA |
| 0.33 | 0.13  | -0.01 | 0     | 3.10E-13 | 0.0025   | 0.77     | 0.87     | hyper2 | NA | NA | NA |
| 0.53 | 0.36  | -0.12 | -0.1  | 1.20E-10 | 3.40E-08 | 0.045    | 0.14     | hyper2 | NA | NA | NA |
| 0.52 | -0.01 | -0.02 | 0.07  | 1.30E-10 | 1        | 0.35     | 0.022    | hyper2 | NA | NA | NA |
| 0.42 | -0.03 | -0.06 | 0.03  | 4.90E-10 | 1        | 0.01     | 0.42     | hyper2 | NA | NA | NA |
| 0.33 | 0.01  | -0.05 | -0.02 | 8.40E-10 | 0.81     | 0.022    | 0.42     | hyper2 | NA | NA | NA |

|       |       |       |       |          |          |          |          |        |    |    |    |
|-------|-------|-------|-------|----------|----------|----------|----------|--------|----|----|----|
| 0.49  | 0.02  | -0.07 | 0.01  | 4.70E-10 | 0.82     | 0.077    | 0.76     | hyper2 | NA | NA | NA |
| 0.53  | 0.07  | -0.01 | 0.03  | 3.20E-18 | 0.034    | 0.6      | 0.19     | hyper2 | NA | NA | NA |
| 0.36  | 0.23  | -0.09 | -0.04 | 6.60E-13 | 4.70E-09 | 8.90E-07 | 0.083    | hyper2 | NA | NA | NA |
| 0.38  | 0.04  | -0.09 | 0.01  | 3.40E-11 | 0.12     | 3.70E-07 | 0.65     | hyper2 | NA | NA | NA |
| 0.34  | 0.04  | -0.06 | 0     | 1.40E-23 | 0.046    | 0.00011  | 0.84     | hyper2 | NA | NA | NA |
| 0.43  | 0.62  | 0.04  | -0.01 | 7.50E-12 | 0.00079  | 0.37     | 0.95     | hyper2 | NA | NA | NA |
| 0.36  | 0.13  | 0     | -0.01 | 1.70E-11 | 0.0014   | 1        | 0.93     | hyper2 | NA | NA | NA |
| 0.38  | 0.25  | -0.03 | -0.01 | 1.80E-10 | 0.00055  | 0.48     | 0.92     | hyper2 | NA | NA | NA |
| 0.48  | 0.19  | -0.2  | -0.19 | 5.60E-18 | 0.00022  | 8.20E-08 | 0.00012  | hyper2 | NA | NA | NA |
| 0.46  | 0.04  | -0.08 | 0.01  | 5.40E-20 | 0.066    | 1.50E-06 | 0.59     | hyper2 | NA | NA | NA |
| 0.34  | -0.01 | -0.05 | -0.04 | 2.20E-13 | 0.85     | 0.19     | 0.24     | hyper2 | NA | NA | NA |
| 0.52  | 0.08  | 0.03  | 0     | 3.90E-11 | 0.05     | 0.38     | 1        | hyper2 | NA | NA | NA |
| 0.66  | 0.37  | 0.04  | 0.09  | 4.20E-13 | 5.60E-05 | 0.17     | 0.0022   | hyper3 | NA | NA | NA |
| 0.87  | 0.19  | -0.1  | -0.01 | 1.50E-21 | 2.00E-05 | 4.10E-07 | 0.86     | hyper3 | NA | NA | NA |
| 0.93  | 0.17  | 0.21  | -0.03 | 8.10E-13 | 7.00E-04 | 0.00033  | 0.41     | hyper3 | NA | NA | NA |
| 0.64  | 0.03  | -0.08 | -0.07 | 6.50E-27 | 0.25     | 0.008    | 0.021    | hyper3 | NA | NA | NA |
| 0.77  | 0.11  | -0.01 | 0.05  | 2.50E-32 | 4.40E-05 | 0.72     | 0.051    | hyper3 | NA | NA | NA |
| 0.81  | 0.59  | -0.1  | 0.04  | 1.20E-10 | 1.10E-09 | 0.13     | 1        | hyper3 | NA | NA | NA |
| 0.79  | 0.2   | -0.04 | 0.05  | 1.70E-12 | 0.0039   | 0.084    | 0.11     | hyper3 | NA | NA | NA |
| 0.72  | 0.18  | -0.01 | 0.07  | 3.30E-11 | 0.00044  | 0.55     | 0.11     | hyper3 | NA | NA | NA |
| 0.71  | 0.14  | -0.07 | 0.22  | 7.90E-11 | 0.039    | 0.29     | 0.28     | hyper3 | NA | NA | NA |
| 0.66  | 0.06  | -0.1  | -0.04 | 7.60E-12 | 0.5      | 0.0011   | 0.21     | hyper3 | NA | NA | NA |
| 0.67  | 0.11  | 0     | 0.04  | 1.20E-11 | 0.0039   | 0.99     | 0.098    | hyper3 | NA | NA | NA |
| 0.95  | 0.02  | -0.03 | 0.02  | 9.70E-23 | 0.3      | 0.12     | 0.46     | hyper3 | NA | NA | NA |
| -0.24 | -0.11 | -0.03 | -0.01 | 2.00E-23 | 0.00018  | 0.022    | 0.6      | hypo1  | NA | NA | NA |
| -0.32 | -0.21 | -0.06 | 0.01  | 6.50E-16 | 0.00012  | 0.0063   | 0.72     | hypo1  | NA | NA | NA |
| -0.47 | -0.3  | -0.21 | -0.16 | 2.20E-11 | 1.60E-06 | 2.80E-06 | 0.0052   | hypo2  | NA | NA | NA |
| -0.53 | 0.14  | 0.04  | 0.12  | 2.50E-13 | 0.00011  | 0.21     | 4.30E-06 | hypo2  | NA | NA | NA |
| -0.59 | -0.59 | -0.12 | -0.15 | 1.90E-10 | 6.60E-08 | 0.027    | 0.022    | hypo2  | NA | NA | NA |
| -0.73 | -0.59 | -0.07 | -0.06 | 1.30E-14 | 3.10E-05 | 0.1      | 0.42     | hypo3  | NA | NA | NA |

|       |       |       |       |          |          |          |          |       |    |    |    |
|-------|-------|-------|-------|----------|----------|----------|----------|-------|----|----|----|
| -0.93 | -0.57 | 0.02  | 0.05  | 3.80E-13 | 0.0087   | 1        | 0.84     | hypo3 | NA | NA | NA |
| -0.36 | -0.31 | 0.01  | 0.03  | 1.00E-09 | 8.00E-08 | 0.92     | 0.63     | NA    | NA | NA | NA |
| 0.89  | -0.02 | -0.05 | -0.04 | 1.60E-09 | 0.83     | 0.17     | 0.46     | NA    | NA | NA | NA |
| -0.5  | -0.41 | -0.06 | -0.01 | 3.70E-09 | 2.10E-06 | 0.0081   | 0.82     | NA    | NA | NA | NA |
| 0.55  | 0.22  | -0.03 | -0.06 | 7.00E-09 | 0.01     | 0.51     | 0.1      | NA    | NA | NA | NA |
| 0.89  | 0.89  | 0.06  | 0.04  | 5.10E-08 | 2.60E-06 | 0.23     | 0.44     | NA    | NA | NA | NA |
| 0.48  | 0.22  | -0.1  | -0.1  | 1.30E-07 | 0.00085  | 0.019    | 0.044    | NA    | NA | NA | NA |
| 0.42  | 0.02  | -0.01 | 0.06  | 4.80E-07 | 0.76     | 0.88     | 0.049    | NA    | NA | NA | NA |
| 0.44  | -0.02 | -0.02 | 0.01  | 7.50E-07 | 0.64     | 0.37     | 0.82     | NA    | NA | NA | NA |
| -0.34 | -0.33 | -0.04 | -0.02 | 1.00E-06 | 1.30E-07 | 0.47     | 0.79     | NA    | NA | NA | NA |
| 0.19  | 0.01  | -0.02 | 0.04  | 1.10E-06 | 0.67     | 0.41     | 0.18     | NA    | NA | NA | NA |
| 0.12  | 0.12  | -0.02 | 0.05  | 1.20E-06 | 6.70E-07 | 0.28     | 0.00094  | NA    | NA | NA | NA |
| 0.09  | 0     | -0.02 | 0.03  | 2.20E-06 | 0.95     | 0.021    | 0.014    | NA    | NA | NA | NA |
| 0.28  | 0.14  | -0.02 | 0     | 3.50E-06 | 0.086    | 0.42     | 1        | NA    | NA | NA | NA |
| 0.29  | 0.3   | -0.07 | 0     | 4.70E-06 | 2.40E-08 | 0.019    | 1        | NA    | NA | NA | NA |
| 0.12  | 0.03  | -0.02 | 0.07  | 6.30E-06 | 0.23     | 0.062    | 8.70E-07 | NA    | NA | NA | NA |
| 0.22  | 0.02  | -0.09 | 0     | 1.20E-05 | 0.73     | 2.30E-07 | 0.89     | NA    | NA | NA | NA |
| 0.1   | 0.03  | -0.04 | -0.05 | 1.30E-05 | 0.14     | 0.0072   | 0.00054  | NA    | NA | NA | NA |
| 0.1   | 0.04  | -0.08 | -0.04 | 1.30E-05 | 0.048    | 6.30E-07 | 0.012    | NA    | NA | NA | NA |
| -0.09 | -0.05 | -0.03 | 0     | 1.60E-05 | 0.021    | 0.0046   | 0.79     | NA    | NA | NA | NA |
| 0.1   | 0.09  | -0.04 | 0.03  | 1.80E-05 | 3.30E-05 | 0.015    | 0.14     | NA    | NA | NA | NA |
| 0.25  | 0.1   | -0.02 | -0.06 | 1.90E-05 | 0.077    | 0.48     | 0.022    | NA    | NA | NA | NA |
| 0.15  | 0.06  | -0.04 | -0.08 | 2.50E-05 | 0.044    | 0.43     | 0.096    | NA    | NA | NA | NA |
| 0.07  | 0.04  | -0.03 | 0.02  | 2.80E-05 | 0.0017   | 0.0091   | 0.099    | NA    | NA | NA | NA |
| 0.36  | 0.05  | 0.02  | 0.06  | 2.90E-05 | 0.15     | 0.41     | 0.0013   | NA    | NA | NA | NA |
| 0.1   | 0.01  | -0.03 | -0.03 | 4.60E-05 | 0.78     | 0.14     | 0.071    | NA    | NA | NA | NA |
| 0.09  | 0.1   | 0     | 0.03  | 5.60E-05 | 2.70E-06 | 0.84     | 0.031    | NA    | NA | NA | NA |
| 0.14  | 0.11  | -0.01 | 0     | 6.20E-05 | 0.00062  | 0.37     | 1        | NA    | NA | NA | NA |
| 0.15  | 0     | -0.03 | 0.03  | 7.60E-05 | 1        | 0.09     | 0.083    | NA    | NA | NA | NA |
| -0.09 | -0.01 | -0.03 | 0.01  | 8.80E-05 | 0.69     | 0.14     | 0.51     | NA    | NA | NA | NA |

|       |       |       |       |          |          |          |          |    |    |    |    |
|-------|-------|-------|-------|----------|----------|----------|----------|----|----|----|----|
| 0.06  | 0.08  | -0.01 | 0.02  | 0.00012  | 9.80E-09 | 0.37     | 0.16     | NA | NA | NA | NA |
| 0.07  | 0.02  | -0.04 | 0     | 0.00015  | 0.15     | 0.0062   | 1        | NA | NA | NA | NA |
| 0.07  | 0.02  | 0     | 0     | 0.00017  | 0.31     | 0.85     | 0.99     | NA | NA | NA | NA |
| 0.1   | 0.04  | -0.08 | 0.02  | 2.00E-04 | 0.07     | 3.90E-06 | 0.35     | NA | NA | NA | NA |
| 0.08  | 0.05  | -0.07 | -0.03 | 0.00022  | 0.0032   | 1.30E-07 | 0.11     | NA | NA | NA | NA |
| -0.07 | -0.05 | -0.06 | 0     | 0.00022  | 0.068    | 0.0018   | 0.91     | NA | NA | NA | NA |
| 0.24  | -0.08 | -0.01 | 0.09  | 0.00022  | 0.045    | 0.77     | 0.00053  | NA | NA | NA | NA |
| -0.1  | 0.02  | -0.04 | -0.05 | 0.00024  | 0.75     | 0.22     | 0.022    | NA | NA | NA | NA |
| 0.09  | 0.08  | 0.01  | 0.04  | 0.00027  | 0.0012   | 0.8      | 0.012    | NA | NA | NA | NA |
| -0.1  | 0.02  | -0.01 | 0.03  | 0.00032  | 0.49     | 0.58     | 0.1      | NA | NA | NA | NA |
| 0.26  | 0     | -0.02 | 0.08  | 0.00032  | 1        | 0.42     | 0.00023  | NA | NA | NA | NA |
| -0.24 | -0.26 | -0.07 | -0.03 | 0.00038  | 8.90E-05 | 0.0045   | 0.17     | NA | NA | NA | NA |
| 0.14  | 0.03  | -0.04 | 0.04  | 0.00044  | 0.35     | 0.22     | 0.24     | NA | NA | NA | NA |
| 0.13  | 0.08  | 0.04  | 0.07  | 0.00045  | 0.013    | 0.2      | 0.0024   | NA | NA | NA | NA |
| 0.09  | 0.11  | -0.05 | -0.03 | 0.00047  | 3.20E-05 | 0.017    | 0.07     | NA | NA | NA | NA |
| 0.35  | 0.02  | -0.05 | 0.07  | 0.00047  | 0.57     | 0.066    | 0.016    | NA | NA | NA | NA |
| 0.07  | 0.12  | 0     | 0.09  | 0.00051  | 2.00E-07 | 0.96     | 5.10E-05 | NA | NA | NA | NA |
| -0.81 | -0.89 | -0.08 | 0.05  | 0.00053  | 2.10E-06 | 0.006    | 0.33     | NA | NA | NA | NA |
| 0.09  | 0.02  | -0.02 | -0.01 | 0.00057  | 0.45     | 0.29     | 0.67     | NA | NA | NA | NA |
| 0.28  | 0.13  | 0.02  | 0.16  | 0.00057  | 0.027    | 0.63     | 0.00014  | NA | NA | NA | NA |
| 0.03  | 0     | -0.01 | 0.01  | 0.00061  | 0.8      | 0.19     | 0.3      | NA | NA | NA | NA |
| 0.19  | 0.76  | -0.1  | -0.03 | 7.00E-04 | 1.70E-07 | 0.00015  | 0.41     | NA | NA | NA | NA |
| 0.12  | 0.16  | -0.02 | 0.06  | 0.00093  | 2.10E-06 | 0.3      | 0.0023   | NA | NA | NA | NA |
| 0.05  | 0.02  | -0.03 | 0.01  | 0.00093  | 0.16     | 0.00075  | 0.37     | NA | NA | NA | NA |
| 0.53  | -0.13 | 0     | 0.1   | 0.001    | 0.15     | 1        | 0.052    | NA | NA | NA | NA |
| 0.11  | 0.06  | -0.05 | -0.02 | 0.0011   | 0.02     | 0.00094  | 0.25     | NA | NA | NA | NA |
| 0.11  | 0.04  | -0.02 | 0     | 0.0011   | 0.05     | 0.097    | 0.85     | NA | NA | NA | NA |
| 0.16  | 0.02  | -0.06 | -0.01 | 0.0015   | 0.59     | 0.015    | 0.76     | NA | NA | NA | NA |
| -0.12 | -0.15 | 0.01  | 0.04  | 0.0016   | 1.00E-06 | 0.37     | 0.0077   | NA | NA | NA | NA |
| -0.08 | -0.03 | -0.03 | 0.03  | 0.0017   | 0.15     | 0.004    | 0.005    | NA | NA | NA | NA |

|       |       |       |       |        |          |          |          |    |    |    |    |
|-------|-------|-------|-------|--------|----------|----------|----------|----|----|----|----|
| 0.06  | 0.03  | -0.01 | -0.02 | 0.0017 | 0.034    | 0.4      | 0.093    | NA | NA | NA | NA |
| 0.06  | 0.07  | 0.02  | 0.06  | 0.002  | 0.00074  | 0.17     | 6.90E-06 | NA | NA | NA | NA |
| 0.1   | 0.01  | 0.04  | 0.02  | 0.0022 | 0.86     | 0.082    | 0.17     | NA | NA | NA | NA |
| -0.13 | -0.15 | 0.01  | -0.02 | 0.0025 | 6.40E-05 | 0.55     | 0.4      | NA | NA | NA | NA |
| 0.07  | 0.09  | -0.12 | -0.05 | 0.0031 | 0.0023   | 1.70E-05 | 0.16     | NA | NA | NA | NA |
| -0.15 | -0.15 | 0.05  | 0.03  | 0.0033 | 0.00042  | 0.035    | 0.24     | NA | NA | NA | NA |
| 0.07  | 0.07  | -0.03 | 0.03  | 0.0034 | 0.002    | 0.00071  | 0.0098   | NA | NA | NA | NA |
| 0.91  | 0.91  | -0.02 | 0.03  | 0.0035 | 0.00089  | 0.81     | 0.68     | NA | NA | NA | NA |
| 0.3   | 0.14  | -0.06 | -0.05 | 0.0039 | 0.0053   | 0.036    | 0.1      | NA | NA | NA | NA |
| -0.15 | -0.06 | -0.02 | 0.01  | 0.0039 | 0.3      | 0.33     | 0.58     | NA | NA | NA | NA |
| -0.16 | -0.07 | -0.2  | -0.04 | 0.004  | 0.27     | 3.20E-09 | 0.37     | NA | NA | NA | NA |
| -0.09 | -0.05 | 0     | 0.03  | 0.0047 | 0.13     | 0.84     | 0.048    | NA | NA | NA | NA |
| 0.3   | 0.12  | -0.02 | 0.01  | 0.0051 | 0.04     | 0.54     | 0.77     | NA | NA | NA | NA |
| -0.06 | -0.06 | -0.04 | 0     | 0.0053 | 4.00E-04 | 0.00019  | 0.71     | NA | NA | NA | NA |
| 0.13  | 0.09  | -0.13 | -0.12 | 0.0054 | 0.07     | 0.00068  | 0.0094   | NA | NA | NA | NA |
| 0.14  | 0.09  | -0.09 | -0.07 | 0.0056 | 0.065    | 0.0097   | 0.018    | NA | NA | NA | NA |
| 0.14  | 0.05  | 0.04  | 0.02  | 0.0057 | 0.24     | 0.14     | 0.33     | NA | NA | NA | NA |
| 0.03  | 0.02  | 0     | 0.02  | 0.006  | 0.028    | 0.87     | 0.054    | NA | NA | NA | NA |
| 0.09  | 0.04  | -0.01 | 0.06  | 0.0061 | 0.053    | 0.32     | 0.00023  | NA | NA | NA | NA |
| 0.05  | 0.01  | -0.05 | 0     | 0.0061 | 0.64     | 0.0039   | 0.91     | NA | NA | NA | NA |
| 0.06  | 0.02  | -0.06 | -0.03 | 0.0063 | 0.18     | 2.00E-04 | 0.069    | NA | NA | NA | NA |
| -0.13 | 0.02  | -0.04 | 0.09  | 0.0063 | 0.76     | 0.14     | 0.022    | NA | NA | NA | NA |
| -0.06 | 0.03  | -0.05 | -0.04 | 0.0065 | 0.51     | 0.001    | 0.0052   | NA | NA | NA | NA |
| 0.3   | 0     | -0.03 | 0     | 0.0069 | 1        | 0.38     | 1        | NA | NA | NA | NA |
| 0.08  | 0.04  | -0.05 | -0.02 | 0.0069 | 0.26     | 0.021    | 0.32     | NA | NA | NA | NA |
| 0.55  | 0.13  | -0.15 | -0.05 | 0.007  | 0.76     | 0.026    | 0.67     | NA | NA | NA | NA |
| 0.13  | -0.03 | 0.03  | 0.03  | 0.0077 | 0.26     | 0.066    | 0.044    | NA | NA | NA | NA |
| -0.24 | -0.13 | -0.02 | -0.12 | 0.0078 | 0.099    | 0.69     | 0.0011   | NA | NA | NA | NA |
| -0.89 | -0.89 | 0     | -0.02 | 0.0079 | 1.10E-06 | 1        | 0.7      | NA | NA | NA | NA |
| 0.1   | 0.08  | 0     | 0.03  | 0.0085 | 0.0055   | 1        | 0.3      | NA | NA | NA | NA |

|       |       |       |       |        |          |          |          |    |    |    |    |
|-------|-------|-------|-------|--------|----------|----------|----------|----|----|----|----|
| -0.11 | -0.01 | -0.09 | 0     | 0.0088 | 0.98     | 4.70E-08 | 0.87     | NA | NA | NA | NA |
| 0.1   | 0.1   | 0.01  | 0.01  | 0.0092 | 0.0045   | 0.71     | 0.91     | NA | NA | NA | NA |
| 0.15  | 0.03  | -0.06 | -0.06 | 0.0093 | 0.46     | 0.11     | 0.035    | NA | NA | NA | NA |
| -0.11 | -0.12 | -0.11 | -0.09 | 0.0095 | 0.00037  | 1.80E-07 | 5.00E-05 | NA | NA | NA | NA |
| -0.04 | 0.03  | -0.04 | 0.01  | 0.011  | 0.067    | 0.0019   | 0.63     | NA | NA | NA | NA |
| 0.14  | 0.07  | 0.01  | 0.01  | 0.013  | 0.15     | 0.74     | 0.55     | NA | NA | NA | NA |
| 0.04  | 0.06  | -0.02 | 0.01  | 0.014  | 1.00E-04 | 0.035    | 0.6      | NA | NA | NA | NA |
| -0.16 | -0.18 | -0.04 | -0.04 | 0.014  | 3.90E-07 | 0.32     | 0.36     | NA | NA | NA | NA |
| -0.16 | -0.13 | -0.18 | 0.02  | 0.015  | 0.078    | 1.60E-05 | 0.84     | NA | NA | NA | NA |
| 0.15  | 0.22  | -0.04 | 0     | 0.015  | 0.00014  | 0.17     | 1        | NA | NA | NA | NA |
| -0.05 | -0.04 | -0.05 | 0     | 0.015  | 0.016    | 6.90E-05 | 0.83     | NA | NA | NA | NA |
| -0.05 | -0.05 | -0.03 | -0.01 | 0.016  | 0.012    | 0.023    | 0.37     | NA | NA | NA | NA |
| 0.12  | 0.07  | -0.02 | 0.07  | 0.016  | 0.21     | 0.62     | 0.081    | NA | NA | NA | NA |
| 0.11  | 0.01  | 0     | 0.02  | 0.017  | 0.9      | 1        | 0.63     | NA | NA | NA | NA |
| 0.16  | -0.02 | -0.06 | 0.07  | 0.018  | 0.84     | 0.0025   | 0.019    | NA | NA | NA | NA |
| 0.42  | -0.18 | -0.05 | 0.05  | 0.018  | 0.075    | 0.031    | 0.07     | NA | NA | NA | NA |
| -0.05 | 0.02  | -0.03 | 0.05  | 0.02   | 0.41     | 0.025    | 0.0058   | NA | NA | NA | NA |
| 0.07  | 0.05  | 0.04  | 0.02  | 0.02   | 0.028    | 0.15     | 0.55     | NA | NA | NA | NA |
| 0.08  | 0.03  | -0.01 | 0.07  | 0.023  | 0.38     | 0.39     | 4.00E-06 | NA | NA | NA | NA |
| 0.06  | 0.02  | -0.02 | -0.02 | 0.025  | 0.2      | 0.26     | 0.15     | NA | NA | NA | NA |
| -0.06 | -0.05 | 0     | 0.04  | 0.026  | 0.036    | 0.99     | 0.07     | NA | NA | NA | NA |
| 0.07  | 0.01  | -0.01 | 0.06  | 0.026  | 0.9      | 0.56     | 0.0033   | NA | NA | NA | NA |
| 0.11  | 0.05  | -0.01 | 0.08  | 0.029  | 0.33     | 0.47     | 5.30E-06 | NA | NA | NA | NA |
| 0.17  | 0.21  | 0.07  | 0.19  | 0.03   | 0.00072  | 0.033    | 5.40E-08 | NA | NA | NA | NA |
| 0.09  | 0.07  | -0.05 | -0.03 | 0.031  | 0.05     | 0.017    | 0.16     | NA | NA | NA | NA |
| -0.12 | 0.18  | -0.09 | 0.03  | 0.031  | 0.22     | 0.0031   | 0.43     | NA | NA | NA | NA |
| 0.05  | 0.02  | 0     | 0.01  | 0.031  | 0.24     | 1        | 0.52     | NA | NA | NA | NA |
| 0.05  | 0.02  | 0.03  | 0     | 0.031  | 0.28     | 0.19     | 1        | NA | NA | NA | NA |
| 0.08  | 0.14  | -0.02 | 0.03  | 0.031  | 2.30E-05 | 0.34     | 0.12     | NA | NA | NA | NA |
| 0.22  | 0     | 0.05  | 0.07  | 0.033  | 1        | 0.025    | 0.003    | NA | NA | NA | NA |



|       |       |       |       |       |          |          |          |    |    |    |    |
|-------|-------|-------|-------|-------|----------|----------|----------|----|----|----|----|
| -0.67 | -0.39 | -0.05 | -0.04 | 0.033 | 0.099    | 0.19     | 0.5      | NA | NA | NA | NA |
| -0.15 | 0     | -0.08 | 0.02  | 0.034 | 1        | 1.60E-05 | 0.39     | NA | NA | NA | NA |
| 0.08  | 0.08  | -0.02 | 0.08  | 0.035 | 0.018    | 0.17     | 2.70E-07 | NA | NA | NA | NA |
| -0.38 | -0.39 | -0.01 | 0.03  | 0.035 | 0.024    | 1        | 0.58     | NA | NA | NA | NA |
| -0.14 | -0.13 | -0.06 | 0.02  | 0.036 | 0.0011   | 0.0043   | 0.6      | NA | NA | NA | NA |
| 0.08  | 0.03  | -0.02 | 0     | 0.036 | 0.32     | 0.57     | 0.98     | NA | NA | NA | NA |
| 0.07  | 0     | -0.04 | 0.06  | 0.036 | 1        | 0.085    | 0.018    | NA | NA | NA | NA |
| 0.08  | 0.05  | 0.02  | 0.11  | 0.036 | 0.17     | 0.36     | 5.20E-05 | NA | NA | NA | NA |
| 0.28  | -0.02 | -0.09 | 0.06  | 0.037 | 0.8      | 0.013    | 0.27     | NA | NA | NA | NA |
| 0.09  | 0.06  | -0.04 | 0.01  | 0.037 | 0.19     | 0.058    | 0.64     | NA | NA | NA | NA |
| 0.06  | 0.11  | -0.06 | -0.01 | 0.037 | 5.90E-05 | 0.00017  | 0.64     | NA | NA | NA | NA |
| 0.13  | 0.05  | -0.06 | -0.01 | 0.038 | 0.38     | 0.0014   | 0.66     | NA | NA | NA | NA |
| -0.21 | 0.37  | -0.04 | 0.04  | 0.04  | 0.016    | 0.25     | 0.43     | NA | NA | NA | NA |
| 0.13  | 0.17  | -0.01 | 0.07  | 0.041 | 0.0013   | 0.79     | 0.0058   | NA | NA | NA | NA |
| -0.09 | -0.05 | -0.01 | -0.01 | 0.044 | 0.047    | 0.55     | 0.7      | NA | NA | NA | NA |
| -0.34 | 0.1   | -0.13 | -0.36 | 0.044 | 1        | 0.095    | 0.00019  | NA | NA | NA | NA |
| 0.04  | 0.03  | -0.02 | 0.03  | 0.045 | 0.13     | 0.33     | 0.084    | NA | NA | NA | NA |
| 0.67  | NA    | -0.33 | -0.19 | 0.045 | NA       | 4.20E-06 | 0.089    | NA | NA | NA | NA |
| -0.42 | 0.3   | -0.02 | 0.15  | 0.046 | 1        | 0.66     | 0.074    | NA | NA | NA | NA |
| 0.06  | -0.02 | -0.02 | -0.01 | 0.046 | 0.54     | 0.37     | 0.55     | NA | NA | NA | NA |
| -0.04 | 0.02  | -0.05 | -0.04 | 0.047 | 0.4      | 0.019    | 0.024    | NA | NA | NA | NA |
| -0.08 | -0.06 | -0.06 | 0.05  | 0.049 | 0.084    | 0.0071   | 0.049    | NA | NA | NA | NA |
| 0.11  | 0.02  | -0.09 | 0.04  | 0.051 | 0.85     | 0.00024  | 0.24     | NA | NA | NA | NA |
| 0.15  | -0.03 | -0.04 | 0     | 0.055 | 0.44     | 0.07     | 0.99     | NA | NA | NA | NA |
| 0.22  | 0.05  | -0.17 | -0.11 | 0.055 | 0.46     | 0.00017  | 0.017    | NA | NA | NA | NA |
| 0.1   | 0     | -0.04 | -0.02 | 0.057 | 1        | 0.038    | 0.3      | NA | NA | NA | NA |
| 0.95  | 0.08  | -0.09 | -0.01 | 0.057 | 0.016    | 0.0076   | 0.96     | NA | NA | NA | NA |
| -0.05 | 0.11  | 0.02  | 0.04  | 0.058 | 0.02     | 0.43     | 0.052    | NA | NA | NA | NA |
| 0.09  | 0.09  | -0.09 | 0.09  | 0.058 | 0.089    | 0.0025   | 0.05     | NA | NA | NA | NA |
| 0.04  | 0.03  | -0.02 | 0.05  | 0.059 | 0.16     | 0.049    | 0.00013  | NA | NA | NA | NA |

|       |       |       |       |       |          |          |          |    |    |    |    |
|-------|-------|-------|-------|-------|----------|----------|----------|----|----|----|----|
| 0.04  | 0.06  | -0.06 | -0.01 | 0.064 | 9.10E-05 | 3.70E-08 | 0.32     | NA | NA | NA | NA |
| -0.06 | 0.06  | -0.06 | 0.03  | 0.064 | 0.096    | 3.00E-06 | 0.04     | NA | NA | NA | NA |
| 0.05  | 0.01  | -0.02 | -0.02 | 0.065 | 0.58     | 0.075    | 0.11     | NA | NA | NA | NA |
| 0.03  | 0     | 0     | 0     | 0.068 | 0.91     | 1        | 1        | NA | NA | NA | NA |
| -0.03 | -0.03 | -0.03 | 0.04  | 0.069 | 0.23     | 0.0087   | 0.00014  | NA | NA | NA | NA |
| 0.31  | 0.12  | -0.05 | 0.03  | 0.069 | 0.17     | 0.098    | 0.41     | NA | NA | NA | NA |
| -0.04 | 0.01  | -0.02 | 0.04  | 0.07  | 0.83     | 0.48     | 0.13     | NA | NA | NA | NA |
| 0.34  | 0.74  | 0.02  | 0.74  | 0.07  | 0.13     | 1        | 0.0097   | NA | NA | NA | NA |
| -0.05 | 0.1   | -0.05 | -0.03 | 0.071 | 9.00E-05 | 6.00E-04 | 0.042    | NA | NA | NA | NA |
| -0.08 | -0.02 | -0.04 | 0.03  | 0.075 | 0.79     | 0.045    | 0.1      | NA | NA | NA | NA |
| 0.05  | 0.07  | -0.01 | 0.04  | 0.079 | 0.014    | 0.44     | 0.039    | NA | NA | NA | NA |
| -0.03 | -0.01 | -0.01 | 0.07  | 0.082 | 0.75     | 0.26     | 1.80E-07 | NA | NA | NA | NA |
| 0.06  | -0.01 | 0.08  | 0.08  | 0.083 | 0.82     | 6.40E-05 | 0.00017  | NA | NA | NA | NA |
| 0.04  | 0.06  | 0     | 0.01  | 0.085 | 0.0074   | 1        | 0.76     | NA | NA | NA | NA |
| 0.06  | 0.03  | -0.04 | -0.01 | 0.088 | 0.32     | 0.32     | 0.9      | NA | NA | NA | NA |
| 0.15  | 0.1   | -0.05 | -0.03 | 0.088 | 0.1      | 0.059    | 0.15     | NA | NA | NA | NA |
| 0.09  | 0.05  | -0.03 | -0.04 | 0.089 | 0.27     | 0.16     | 0.063    | NA | NA | NA | NA |
| 0.1   | -0.03 | -0.05 | 0.02  | 0.09  | 0.43     | 0.07     | 0.5      | NA | NA | NA | NA |
| 0.05  | 0.35  | -0.1  | -0.02 | 0.091 | 0.01     | 2.60E-09 | 0.48     | NA | NA | NA | NA |
| 0.13  | 0.11  | -0.06 | -0.07 | 0.093 | 0.088    | 0.042    | 0.021    | NA | NA | NA | NA |
| 0.07  | 0.02  | -0.03 | 0.06  | 0.098 | 0.59     | 0.26     | 0.016    | NA | NA | NA | NA |
| 0.07  | 0     | -0.06 | -0.02 | 0.098 | 1        | 0.0044   | 0.53     | NA | NA | NA | NA |
| 0.05  | 0.03  | -0.05 | 0.01  | 0.099 | 0.23     | 9.10E-06 | 0.35     | NA | NA | NA | NA |
| -0.11 | -0.15 | -0.05 | -0.02 | 0.099 | 0.011    | 0.056    | 0.47     | NA | NA | NA | NA |
| -0.03 | 0.04  | -0.02 | 0.02  | 0.099 | 0.037    | 0.062    | 0.074    | NA | NA | NA | NA |
| 0.04  | 0.14  | -0.02 | 0.04  | 0.1   | 8.60E-05 | 0.3      | 0.017    | NA | NA | NA | NA |
| -0.07 | -0.09 | -0.06 | 0.01  | 0.1   | 0.019    | 0.007    | 0.87     | NA | NA | NA | NA |
| 0.07  | 0.02  | -0.15 | -0.15 | 0.1   | 0.53     | 1.90E-07 | 8.70E-06 | NA | NA | NA | NA |
| -0.11 | -0.11 | -0.06 | -0.01 | 0.11  | 0.11     | 0.004    | 0.8      | NA | NA | NA | NA |
| 0.04  | 0.05  | -0.01 | 0.03  | 0.11  | 0.0082   | 0.55     | 0.063    | NA | NA | NA | NA |

|       |       |       |       |      |          |          |          |    |    |    |    |
|-------|-------|-------|-------|------|----------|----------|----------|----|----|----|----|
| 0.03  | 0.04  | -0.01 | -0.07 | 0.11 | 0.028    | 0.63     | 2.00E-04 | NA | NA | NA | NA |
| -0.13 | 0.19  | -0.01 | 0.12  | 0.12 | 0.23     | 0.68     | 4.90E-05 | NA | NA | NA | NA |
| -0.16 | -0.1  | -0.01 | 0     | 0.12 | 0.33     | 0.77     | 1        | NA | NA | NA | NA |
| 0.08  | -0.03 | -0.02 | 0.01  | 0.12 | 0.41     | 0.42     | 0.61     | NA | NA | NA | NA |
| -0.14 | -0.2  | 0.06  | 0.02  | 0.12 | 3.00E-05 | 0.039    | 0.52     | NA | NA | NA | NA |
| 0.04  | 0     | -0.03 | 0.02  | 0.13 | 0.99     | 0.026    | 0.22     | NA | NA | NA | NA |
| 0.05  | -0.01 | -0.01 | -0.03 | 0.13 | 0.92     | 0.73     | 0.15     | NA | NA | NA | NA |
| -0.12 | -0.16 | -0.09 | -0.03 | 0.13 | 0.035    | 3.00E-04 | 0.24     | NA | NA | NA | NA |
| 0.2   | 0.2   | 0     | 0.15  | 0.13 | 0.09     | 1        | 1.80E-06 | NA | NA | NA | NA |
| 0.08  | 0.05  | -0.11 | -0.06 | 0.13 | 0.34     | 5.10E-05 | 0.035    | NA | NA | NA | NA |
| 0.07  | 0.04  | -0.03 | 0.02  | 0.13 | 0.73     | 0.16     | 0.41     | NA | NA | NA | NA |
| 0.04  | 0.02  | -0.09 | -0.04 | 0.14 | 0.2      | 0.00017  | 0.16     | NA | NA | NA | NA |
| -0.06 | -0.04 | -0.02 | 0.12  | 0.14 | 0.35     | 0.46     | 0.00016  | NA | NA | NA | NA |
| 0.31  | -0.05 | 0.04  | 0.04  | 0.14 | 1        | 0.66     | 0.88     | NA | NA | NA | NA |
| -0.03 | 0     | -0.02 | 0.02  | 0.14 | 1        | 0.15     | 0.23     | NA | NA | NA | NA |
| 0.11  | 0.12  | -0.04 | 0.01  | 0.14 | 0.059    | 0.08     | 0.67     | NA | NA | NA | NA |
| 0.15  | -0.06 | -0.01 | 0.14  | 0.14 | 0.12     | 0.69     | 1.10E-05 | NA | NA | NA | NA |
| 0.06  | -0.04 | 0     | 0.05  | 0.14 | 0.24     | 0.82     | 0.0031   | NA | NA | NA | NA |
| -0.04 | -0.04 | -0.05 | 0     | 0.14 | 0.11     | 1.30E-06 | 0.93     | NA | NA | NA | NA |
| 0.03  | 0     | -0.02 | 0.03  | 0.15 | 0.85     | 0.086    | 0.0054   | NA | NA | NA | NA |
| 0.08  | 0.03  | 0     | 0.07  | 0.15 | 0.46     | 1        | 0.00013  | NA | NA | NA | NA |
| 0.07  | 0     | -0.04 | -0.05 | 0.15 | 1        | 0.36     | 0.26     | NA | NA | NA | NA |
| 0.04  | 0.02  | -0.02 | 0     | 0.15 | 0.6      | 0.38     | 0.91     | NA | NA | NA | NA |
| -0.09 | -0.09 | -0.05 | -0.02 | 0.15 | 0.051    | 0.0078   | 0.37     | NA | NA | NA | NA |
| 0.05  | 0.14  | -0.05 | 0.04  | 0.15 | 1.70E-05 | 0.015    | 0.088    | NA | NA | NA | NA |
| 0.04  | 0.03  | -0.05 | 0.01  | 0.15 | 0.055    | 0.0084   | 0.57     | NA | NA | NA | NA |
| -0.2  | -0.22 | -0.05 | -0.04 | 0.15 | 0.094    | 0.04     | 0.24     | NA | NA | NA | NA |
| 0.02  | 0.04  | -0.03 | -0.02 | 0.16 | 0.0019   | 0.0018   | 0.16     | NA | NA | NA | NA |
| 0.05  | 0.01  | 0.02  | 0.07  | 0.17 | 0.82     | 0.54     | 0.025    | NA | NA | NA | NA |
| -0.08 | -0.11 | -0.09 | -0.17 | 0.17 | 0.028    | 0.011    | 7.00E-06 | NA | NA | NA | NA |

|       |       |       |       |      |          |          |          |    |    |    |    |
|-------|-------|-------|-------|------|----------|----------|----------|----|----|----|----|
| -0.91 | -0.94 | -0.01 | -0.01 | 0.17 | 0.13     | 0.86     | 0.97     | NA | NA | NA | NA |
| 0.04  | 0.11  | -0.05 | 0.02  | 0.17 | 0.00045  | 0.018    | 0.42     | NA | NA | NA | NA |
| -0.05 | -0.11 | -0.05 | 0.01  | 0.17 | 0.00018  | 0.018    | 0.64     | NA | NA | NA | NA |
| 0.02  | 0.01  | -0.03 | -0.01 | 0.17 | 0.47     | 0.0051   | 0.49     | NA | NA | NA | NA |
| 0.03  | 0.02  | 0.02  | 0.05  | 0.18 | 0.16     | 0.36     | 0.0011   | NA | NA | NA | NA |
| 0.03  | -0.01 | -0.02 | 0.02  | 0.18 | 0.41     | 0.049    | 0.16     | NA | NA | NA | NA |
| -0.06 | -0.04 | -0.1  | -0.06 | 0.18 | 0.32     | 3.30E-06 | 0.039    | NA | NA | NA | NA |
| -0.07 | -0.03 | -0.04 | 0     | 0.19 | 0.48     | 0.062    | 0.91     | NA | NA | NA | NA |
| 0.05  | -0.04 | -0.01 | 0.1   | 0.19 | 0.39     | 0.38     | 3.30E-05 | NA | NA | NA | NA |
| 0.05  | 0.03  | -0.02 | -0.02 | 0.19 | 0.21     | 0.3      | 0.35     | NA | NA | NA | NA |
| -0.11 | -0.14 | -0.01 | 0.03  | 0.19 | 0.24     | 0.8      | 0.22     | NA | NA | NA | NA |
| 0.26  | 0.11  | -0.1  | 0.12  | 0.2  | 0.14     | 0.014    | 0.0086   | NA | NA | NA | NA |
| -0.04 | -0.02 | -0.21 | -0.24 | 0.2  | 0.57     | 1.50E-07 | 1.10E-08 | NA | NA | NA | NA |
| 0.02  | 0.02  | 0     | 0.05  | 0.2  | 0.27     | 0.98     | 0.012    | NA | NA | NA | NA |
| 0.11  | 0.09  | -0.09 | -0.04 | 0.2  | 0.63     | 0.031    | 0.34     | NA | NA | NA | NA |
| 0.06  | 0.01  | -0.04 | 0.03  | 0.2  | 0.89     | 0.12     | 0.19     | NA | NA | NA | NA |
| -0.05 | -0.12 | -0.07 | 0     | 0.2  | 4.40E-05 | 0.0046   | 1        | NA | NA | NA | NA |
| 0.05  | 0.02  | -0.07 | -0.03 | 0.2  | 0.5      | 9.50E-06 | 0.1      | NA | NA | NA | NA |
| 0.03  | 0.03  | -0.02 | -0.01 | 0.21 | 0.11     | 0.27     | 0.78     | NA | NA | NA | NA |
| -0.17 | -0.05 | -0.17 | -0.15 | 0.21 | 0.74     | 0.0054   | 0.0012   | NA | NA | NA | NA |
| 0.06  | -0.04 | 0.05  | -0.01 | 0.21 | 0.18     | 0.18     | 0.65     | NA | NA | NA | NA |
| -0.08 | -0.03 | -0.06 | -0.08 | 0.22 | 0.6      | 0.27     | 0.029    | NA | NA | NA | NA |
| -0.2  | 0     | 0.65  | 0.3   | 0.22 | 1        | 2.00E-04 | 0.079    | NA | NA | NA | NA |
| 0.14  | 0.18  | 0.07  | 0.16  | 0.22 | 0.33     | 0.19     | 0.0024   | NA | NA | NA | NA |
| -0.11 | -0.08 | -0.05 | 0.02  | 0.22 | 0.091    | 0.1      | 0.54     | NA | NA | NA | NA |
| -0.04 | -0.05 | 0.01  | 0.09  | 0.22 | 0.041    | 0.58     | 0.00046  | NA | NA | NA | NA |
| -0.03 | -0.05 | -0.05 | 0.03  | 0.23 | 0.00046  | 0.00017  | 0.028    | NA | NA | NA | NA |
| -0.05 | 0.12  | 0.03  | 0.01  | 0.23 | 0.003    | 0.34     | 0.83     | NA | NA | NA | NA |
| 0.06  | 0.01  | -0.06 | -0.02 | 0.24 | 0.96     | 0.0082   | 0.58     | NA | NA | NA | NA |
| 0.16  | 0.15  | 0     | 0.12  | 0.24 | 0.21     | 1        | 0.0077   | NA | NA | NA | NA |

|       |       |       |       |      |          |          |          |    |    |    |    |
|-------|-------|-------|-------|------|----------|----------|----------|----|----|----|----|
| 0.04  | 0.06  | -0.07 | 0.06  | 0.24 | 0.015    | 1.10E-05 | 0.0063   | NA | NA | NA | NA |
| 0.27  | 0.01  | -0.05 | -0.02 | 0.24 | 1        | 0.033    | 0.62     | NA | NA | NA | NA |
| 0.02  | 0.02  | -0.02 | 0.01  | 0.24 | 0.21     | 0.055    | 0.46     | NA | NA | NA | NA |
| 0.04  | -0.03 | -0.03 | 0.04  | 0.24 | 0.17     | 0.00073  | 0.00061  | NA | NA | NA | NA |
| 0.13  | 0     | -0.03 | 0.08  | 0.24 | 1        | 0.68     | 0.049    | NA | NA | NA | NA |
| 0.13  | -0.05 | -0.04 | 0.08  | 0.24 | 0.59     | 0.092    | 0.0095   | NA | NA | NA | NA |
| -0.04 | 0.02  | -0.04 | 0     | 0.24 | 0.47     | 0.09     | 1        | NA | NA | NA | NA |
| -0.03 | 0.03  | 0.03  | 0.04  | 0.24 | 0.36     | 0.21     | 0.099    | NA | NA | NA | NA |
| 0.06  | -0.01 | -0.1  | -0.1  | 0.24 | 0.77     | 0.0015   | 0.0016   | NA | NA | NA | NA |
| -0.05 | 0.11  | 0     | 0.03  | 0.25 | 0.073    | 1        | 0.54     | NA | NA | NA | NA |
| -0.06 | -0.04 | 0.05  | 0.15  | 0.26 | 0.35     | 0.27     | 0.0013   | NA | NA | NA | NA |
| 0.04  | -0.02 | -0.01 | 0.02  | 0.26 | 0.54     | 0.61     | 0.071    | NA | NA | NA | NA |
| 0.02  | 0     | -0.01 | 0.03  | 0.26 | 0.82     | 0.35     | 0.016    | NA | NA | NA | NA |
| 0.03  | 0.07  | -0.02 | -0.03 | 0.27 | 0.002    | 0.32     | 0.032    | NA | NA | NA | NA |
| 0.03  | 0.13  | -0.01 | 0.05  | 0.27 | 3.10E-07 | 0.42     | 0.0057   | NA | NA | NA | NA |
| 0.07  | 0.01  | -0.07 | -0.02 | 0.27 | 0.9      | 0.0022   | 0.5      | NA | NA | NA | NA |
| 0.12  | NA    | -0.02 | 0.02  | 0.27 | NA       | 0.39     | 0.59     | NA | NA | NA | NA |
| 0.27  | 0.07  | -0.15 | 0     | 0.28 | 0.86     | 0.0072   | 1        | NA | NA | NA | NA |
| 0.15  | 0.11  | -0.05 | -0.05 | 0.28 | 1        | 0.38     | 0.28     | NA | NA | NA | NA |
| 0.1   | 0.14  | -0.02 | 0.01  | 0.28 | 0.098    | 0.69     | 0.91     | NA | NA | NA | NA |
| -0.16 | 0     | -0.07 | -0.03 | 0.28 | 1        | 0.015    | 0.36     | NA | NA | NA | NA |
| -0.12 | 0.21  | 0.05  | 0.02  | 0.29 | 0.2      | 0.42     | 0.67     | NA | NA | NA | NA |
| 0.22  | 0.04  | -0.07 | 0.11  | 0.29 | 1        | 0.19     | 0.21     | NA | NA | NA | NA |
| 0.04  | 0.06  | 0.01  | 0.05  | 0.29 | 0.15     | 0.64     | 0.058    | NA | NA | NA | NA |
| 0.04  | 0.04  | -0.01 | 0.05  | 0.3  | 0.13     | 0.8      | 0.014    | NA | NA | NA | NA |
| -0.14 | -0.27 | -0.02 | 0.12  | 0.3  | 0.00025  | 0.51     | 7.20E-05 | NA | NA | NA | NA |
| 0.02  | 0.02  | -0.02 | 0.05  | 0.3  | 0.18     | 0.16     | 0.0052   | NA | NA | NA | NA |
| 0.08  | 0.02  | -0.01 | 0.01  | 0.3  | 1        | 0.9      | 0.88     | NA | NA | NA | NA |
| -0.02 | 0     | -0.03 | 0.05  | 0.31 | 1        | 0.019    | 0.00036  | NA | NA | NA | NA |
| -0.07 | -0.1  | -0.01 | 0.03  | 0.31 | 0.032    | 0.93     | 0.29     | NA | NA | NA | NA |

|       |       |       |       |      |         |          |          |    |    |    |    |
|-------|-------|-------|-------|------|---------|----------|----------|----|----|----|----|
| -0.04 | 0.12  | 0     | 0.06  | 0.31 | 0.011   | 1        | 0.084    | NA | NA | NA | NA |
| -0.05 | -0.05 | -0.01 | 0.07  | 0.31 | 0.073   | 0.79     | 2.50E-05 | NA | NA | NA | NA |
| 0.05  | 0     | -0.07 | 0     | 0.32 | 1       | 0.021    | 1        | NA | NA | NA | NA |
| 0.25  | 0.01  | -0.14 | -0.12 | 0.32 | 1       | 0.24     | 0.77     | NA | NA | NA | NA |
| 0.13  | -0.15 | 0.06  | 0.07  | 0.32 | 0.15    | 0.11     | 0.049    | NA | NA | NA | NA |
| -0.02 | 0.01  | -0.05 | -0.01 | 0.32 | 0.59    | 0.0016   | 0.49     | NA | NA | NA | NA |
| -0.33 | -0.54 | 0.01  | 0.11  | 0.32 | 0.061   | 0.76     | 0.00098  | NA | NA | NA | NA |
| 0.12  | 0.09  | -0.01 | 0     | 0.32 | 0.37    | 0.81     | 1        | NA | NA | NA | NA |
| -0.04 | -0.05 | 0.04  | 0.06  | 0.32 | 0.13    | 0.025    | 1.40E-05 | NA | NA | NA | NA |
| 0.1   | 0.08  | -0.08 | 0.02  | 0.33 | 0.75    | 0.0016   | 0.68     | NA | NA | NA | NA |
| -0.03 | 0     | -0.04 | 0     | 0.33 | 1       | 0.036    | 1        | NA | NA | NA | NA |
| 0.04  | -0.03 | -0.11 | -0.03 | 0.33 | 0.24    | 3.70E-09 | 0.29     | NA | NA | NA | NA |
| -0.06 | -0.07 | -0.03 | 0.03  | 0.34 | 0.17    | 0.11     | 0.091    | NA | NA | NA | NA |
| 0.05  | 0.05  | 0.02  | 0.13  | 0.35 | 0.23    | 0.4      | 6.30E-08 | NA | NA | NA | NA |
| -0.15 | NA    | -0.11 | 0.21  | 0.35 | NA      | 0.78     | 0.088    | NA | NA | NA | NA |
| 0.02  | 0     | -0.02 | 0.01  | 0.35 | 0.73    | 0.088    | 0.69     | NA | NA | NA | NA |
| 0.24  | -0.04 | -0.05 | 0.05  | 0.35 | 0.92    | 0.2      | 0.28     | NA | NA | NA | NA |
| 0.03  | -0.01 | -0.01 | 0.07  | 0.37 | 0.85    | 0.72     | 0.00025  | NA | NA | NA | NA |
| -0.03 | -0.07 | -0.01 | 0.03  | 0.37 | 0.00011 | 0.37     | 0.0055   | NA | NA | NA | NA |
| 0.04  | 0.02  | -0.03 | 0.01  | 0.37 | 0.58    | 0.18     | 0.77     | NA | NA | NA | NA |
| 0.04  | 0.06  | -0.02 | 0.01  | 0.37 | 0.042   | 0.24     | 0.67     | NA | NA | NA | NA |
| 0.02  | 0.02  | -0.04 | 0.01  | 0.37 | 0.31    | 0.0066   | 0.77     | NA | NA | NA | NA |
| 0.06  | 0     | -0.05 | -0.01 | 0.37 | 1       | 0.067    | 0.73     | NA | NA | NA | NA |
| 0.17  | -0.03 | -0.08 | -0.12 | 0.37 | 0.82    | 0.33     | 0.18     | NA | NA | NA | NA |
| 0.04  | 0.05  | -0.04 | -0.04 | 0.37 | 0.28    | 0.086    | 0.035    | NA | NA | NA | NA |
| -0.02 | 0.05  | -0.03 | -0.03 | 0.37 | 0.077   | 0.1      | 0.19     | NA | NA | NA | NA |
| 0.03  | 0.03  | -0.01 | 0.03  | 0.37 | 0.39    | 0.64     | 0.076    | NA | NA | NA | NA |
| -0.09 | -0.15 | -0.06 | 0.03  | 0.37 | 0.04    | 0.072    | 0.56     | NA | NA | NA | NA |
| 0.02  | 0     | -0.04 | 0     | 0.38 | 0.97    | 0.0012   | 0.87     | NA | NA | NA | NA |
| 0.03  | 0.02  | -0.08 | 0.03  | 0.38 | 0.51    | 2.70E-09 | 0.14     | NA | NA | NA | NA |

|       |       |       |       |      |          |          |          |    |    |    |    |
|-------|-------|-------|-------|------|----------|----------|----------|----|----|----|----|
| 0.06  | -0.05 | -0.06 | -0.02 | 0.38 | 0.2      | 0.00076  | 0.31     | NA | NA | NA | NA |
| 0.07  | 0.03  | -0.04 | 0     | 0.38 | 0.36     | 0.057    | 1        | NA | NA | NA | NA |
| 0.1   | 0.26  | -0.06 | 0.22  | 0.38 | 0.0015   | 0.14     | 0.0013   | NA | NA | NA | NA |
| -0.19 | -0.2  | -0.07 | -0.06 | 0.38 | 0.043    | 0.035    | 0.028    | NA | NA | NA | NA |
| 0.03  | -0.02 | -0.06 | -0.03 | 0.38 | 0.46     | 0.0038   | 0.19     | NA | NA | NA | NA |
| -0.02 | 0.02  | -0.06 | 0.02  | 0.38 | 0.26     | 2.20E-05 | 0.24     | NA | NA | NA | NA |
| -0.02 | 0.01  | -0.02 | 0.01  | 0.39 | 0.69     | 0.15     | 0.49     | NA | NA | NA | NA |
| 0.02  | 0     | -0.05 | 0.01  | 0.39 | 0.9      | 0.028    | 0.82     | NA | NA | NA | NA |
| 0.43  | -0.01 | -0.05 | -0.04 | 0.39 | 1        | 0.28     | 0.31     | NA | NA | NA | NA |
| 0.05  | -0.05 | -0.05 | 0.1   | 0.39 | 0.24     | 0.012    | 3.50E-05 | NA | NA | NA | NA |
| -0.05 | -0.06 | -0.09 | -0.01 | 0.39 | 0.34     | 0.0016   | 0.85     | NA | NA | NA | NA |
| 0.05  | 0.01  | -0.03 | -0.01 | 0.4  | 0.79     | 0.2      | 0.77     | NA | NA | NA | NA |
| 0.41  | 0.12  | -0.01 | 0.05  | 0.4  | 0.32     | 0.92     | 0.48     | NA | NA | NA | NA |
| -0.01 | 0.04  | -0.02 | 0     | 0.4  | 0.022    | 0.044    | 0.89     | NA | NA | NA | NA |
| 0.13  | -0.15 | 0     | 0.05  | 0.4  | 0.0027   | 1        | 0.13     | NA | NA | NA | NA |
| 0.42  | 0.03  | -0.07 | -0.03 | 0.41 | 0.53     | 0.0053   | 0.22     | NA | NA | NA | NA |
| 0.07  | 0.1   | -0.04 | 0.1   | 0.41 | 0.26     | 0.36     | 0.064    | NA | NA | NA | NA |
| -0.06 | -0.13 | -0.02 | 0.07  | 0.42 | 5.90E-05 | 0.49     | 0.042    | NA | NA | NA | NA |
| -0.03 | -0.03 | 0     | 0.03  | 0.42 | 0.29     | 1        | 0.044    | NA | NA | NA | NA |
| 0.05  | 0.1   | -0.05 | 0.06  | 0.43 | 0.054    | 0.033    | 0.077    | NA | NA | NA | NA |
| 0.06  | 0.06  | -0.12 | -0.05 | 0.43 | 0.75     | 0.005    | 0.24     | NA | NA | NA | NA |
| 0.02  | 0.13  | -0.04 | 0.1   | 0.43 | 0.00037  | 0.027    | 0.00035  | NA | NA | NA | NA |
| -0.1  | -0.1  | -0.11 | 0.08  | 0.43 | 0.48     | 0.0055   | 0.21     | NA | NA | NA | NA |
| 0.04  | -0.01 | -0.01 | 0.1   | 0.44 | 0.96     | 0.82     | 8.30E-06 | NA | NA | NA | NA |
| 0.01  | 0.01  | -0.03 | 0.04  | 0.44 | 0.46     | 0.0055   | 0.0046   | NA | NA | NA | NA |
| 0.02  | 0     | -0.04 | 0     | 0.44 | 0.89     | 0.0011   | 0.9      | NA | NA | NA | NA |
| 0.04  | 0.35  | 0.03  | 0.01  | 0.44 | 6.60E-06 | 0.52     | 0.97     | NA | NA | NA | NA |
| -0.02 | -0.01 | -0.03 | 0     | 0.44 | 0.65     | 0.028    | 0.88     | NA | NA | NA | NA |
| -0.02 | 0.03  | -0.05 | 0.09  | 0.45 | 0.29     | 0.0022   | 0.00022  | NA | NA | NA | NA |
| -0.04 | -0.07 | -0.04 | 0.07  | 0.45 | 0.42     | 0.16     | 0.094    | NA | NA | NA | NA |

|       |       |       |       |      |          |          |          |    |    |    |    |
|-------|-------|-------|-------|------|----------|----------|----------|----|----|----|----|
| 0.05  | -0.12 | -0.07 | -0.06 | 0.45 | 0.0054   | 0.00035  | 0.011    | NA | NA | NA | NA |
| -0.02 | 0.01  | -0.07 | 0     | 0.45 | 0.84     | 0.00019  | 1        | NA | NA | NA | NA |
| 0.05  | 0.06  | 0     | 0.07  | 0.45 | 0.25     | 0.95     | 0.00024  | NA | NA | NA | NA |
| 0.07  | 0.51  | 0.01  | 0.06  | 0.45 | 1.90E-07 | 0.85     | 0.16     | NA | NA | NA | NA |
| -0.02 | 0.02  | -0.01 | 0     | 0.46 | 0.37     | 0.23     | 0.76     | NA | NA | NA | NA |
| -0.05 | -0.07 | 0.02  | 0     | 0.46 | 0.3      | 0.61     | 1        | NA | NA | NA | NA |
| 0.2   | 0.12  | 0.01  | -0.03 | 0.46 | 0.67     | 0.54     | 0.18     | NA | NA | NA | NA |
| -0.06 | 0.09  | -0.09 | 0     | 0.46 | 0.24     | 9.10E-05 | 0.95     | NA | NA | NA | NA |
| 0.09  | 0.1   | 0.02  | 0.18  | 0.47 | 0.35     | 0.58     | 0.00011  | NA | NA | NA | NA |
| 0.04  | 0.21  | -0.06 | 0.05  | 0.47 | 9.30E-05 | 0.0034   | 0.018    | NA | NA | NA | NA |
| 0.09  | -0.04 | -0.16 | -0.26 | 0.47 | 0.77     | 0.013    | 1.00E-04 | NA | NA | NA | NA |
| 0.02  | 0.02  | -0.01 | 0.03  | 0.48 | 0.17     | 0.67     | 0.087    | NA | NA | NA | NA |
| 0.04  | 0.04  | -0.08 | 0.02  | 0.49 | 0.53     | 0.0046   | 1        | NA | NA | NA | NA |
| -0.04 | 0.01  | -0.05 | 0     | 0.49 | 1        | 0.079    | 0.96     | NA | NA | NA | NA |
| 0.09  | -0.04 | -0.04 | 0.11  | 0.49 | 0.53     | 0.26     | 0.0022   | NA | NA | NA | NA |
| 0.03  | 0.04  | -0.01 | 0.06  | 0.49 | 0.39     | 0.65     | 0.016    | NA | NA | NA | NA |
| -0.02 | -0.05 | 0.01  | 0.01  | 0.5  | 0.016    | 0.69     | 0.58     | NA | NA | NA | NA |
| -0.02 | 0.01  | -0.05 | -0.01 | 0.51 | 0.78     | 0.0067   | 0.68     | NA | NA | NA | NA |
| -0.02 | 0.02  | -0.06 | -0.03 | 0.51 | 0.48     | 1.50E-05 | 0.026    | NA | NA | NA | NA |
| 0.03  | -0.02 | -0.02 | 0.02  | 0.51 | 0.7      | 0.38     | 0.39     | NA | NA | NA | NA |
| -0.03 | 0     | -0.03 | 0     | 0.51 | 1        | 0.0095   | 0.97     | NA | NA | NA | NA |
| 0.81  | 0.14  | -0.01 | 0.09  | 0.51 | 1        | 0.93     | 0.41     | NA | NA | NA | NA |
| 0.09  | 0.4   | 0.02  | 0.01  | 0.51 | 0.08     | 1        | 1        | NA | NA | NA | NA |
| -0.02 | -0.06 | -0.03 | 0.02  | 0.51 | 0.019    | 0.02     | 0.12     | NA | NA | NA | NA |
| -0.03 | 0.08  | -0.07 | 0.07  | 0.52 | 0.12     | 0.0024   | 0.022    | NA | NA | NA | NA |
| 0.03  | -0.03 | -0.01 | 0.01  | 0.52 | 0.25     | 0.6      | 0.64     | NA | NA | NA | NA |
| -0.02 | -0.06 | -0.02 | 0.02  | 0.52 | 0.012    | 0.21     | 0.24     | NA | NA | NA | NA |
| 0.02  | -0.01 | -0.04 | -0.04 | 0.52 | 0.76     | 0.027    | 0.034    | NA | NA | NA | NA |
| 0.04  | 0.12  | -0.04 | 0.06  | 0.53 | 0.021    | 0.028    | 0.016    | NA | NA | NA | NA |
| -0.03 | 0.05  | -0.03 | 0.06  | 0.53 | 0.03     | 0.15     | 0.028    | NA | NA | NA | NA |



|       |       |       |       |      |          |          |          |    |    |    |    |
|-------|-------|-------|-------|------|----------|----------|----------|----|----|----|----|
| 0.03  | -0.08 | -0.04 | 0.04  | 0.53 | 0.0028   | 0.018    | 0.041    | NA | NA | NA | NA |
| 0.04  | 0.04  | -0.06 | 0     | 0.54 | 0.2      | 0.0075   | 0.91     | NA | NA | NA | NA |
| 0.39  | 0.02  | -0.02 | -0.05 | 0.54 | 0.61     | 0.54     | 0.041    | NA | NA | NA | NA |
| 0.05  | 0.13  | -0.02 | 0     | 0.54 | 0.034    | 0.45     | 0.97     | NA | NA | NA | NA |
| -0.05 | -0.09 | 0.05  | 0.06  | 0.54 | 0.3      | 0.11     | 0.065    | NA | NA | NA | NA |
| 0.01  | -0.01 | -0.03 | 0     | 0.54 | 0.53     | 0.025    | 0.94     | NA | NA | NA | NA |
| 0.06  | 0     | 0     | 0.1   | 0.55 | 1        | 1        | 0.05     | NA | NA | NA | NA |
| 0.01  | 0.14  | -0.02 | 0.06  | 0.55 | 1.20E-07 | 0.21     | 0.00012  | NA | NA | NA | NA |
| -0.05 | -0.07 | 0     | 0.02  | 0.55 | 0.56     | 1        | 0.77     | NA | NA | NA | NA |
| 0.06  | 0.16  | -0.08 | -0.01 | 0.55 | 0.031    | 0.00024  | 0.62     | NA | NA | NA | NA |
| 0.06  | 0.25  | -0.03 | 0.12  | 0.56 | 0.00057  | 0.17     | 1.70E-05 | NA | NA | NA | NA |
| 0.04  | 0.14  | -0.06 | 0.07  | 0.56 | 0.061    | 0.054    | 0.071    | NA | NA | NA | NA |
| 0.03  | 0.05  | 0.01  | 0.07  | 0.56 | 0.19     | 0.75     | 0.00071  | NA | NA | NA | NA |
| -0.01 | -0.01 | -0.08 | -0.06 | 0.56 | 0.85     | 0.00018  | 0.013    | NA | NA | NA | NA |
| 0.02  | 0.01  | -0.02 | 0.03  | 0.56 | 0.78     | 0.23     | 0.058    | NA | NA | NA | NA |
| 0.15  | 0.2   | 0.08  | 0.12  | 0.56 | 0.29     | 0.2      | 0.013    | NA | NA | NA | NA |
| 0.09  | -0.13 | 0.05  | 0.1   | 0.58 | 0.048    | 0.062    | 0.00013  | NA | NA | NA | NA |
| -0.11 | -0.1  | -0.12 | -0.08 | 0.58 | 0.8      | 0.0012   | 0.082    | NA | NA | NA | NA |
| -0.02 | 0.08  | -0.07 | 0.03  | 0.59 | 0.0086   | 7.70E-05 | 0.093    | NA | NA | NA | NA |
| -0.1  | 0.08  | 0.12  | 0.18  | 0.59 | 0.8      | 0.062    | 0.0012   | NA | NA | NA | NA |
| -0.05 | -0.11 | -0.03 | 0.06  | 0.59 | 0.02     | 0.3      | 0.091    | NA | NA | NA | NA |
| -0.01 | -0.01 | -0.04 | 0.03  | 0.59 | 0.42     | 0.0081   | 0.09     | NA | NA | NA | NA |
| 0.01  | 0.07  | -0.04 | 0.04  | 0.6  | 0.00016  | 0.00019  | 0.0016   | NA | NA | NA | NA |
| 0.01  | 0.05  | -0.01 | 0.02  | 0.6  | 0.0043   | 0.56     | 0.18     | NA | NA | NA | NA |
| -0.01 | -0.01 | -0.04 | 0.01  | 0.61 | 0.57     | 0.00095  | 0.4      | NA | NA | NA | NA |
| 0.06  | NA    | -0.05 | 0.05  | 0.61 | NA       | 0.088    | 0.12     | NA | NA | NA | NA |
| -0.08 | -0.11 | -0.06 | 0.09  | 0.61 | 0.2      | 0.11     | 0.13     | NA | NA | NA | NA |
| -0.02 | 0.05  | -0.04 | -0.01 | 0.61 | 0.16     | 0.081    | 0.55     | NA | NA | NA | NA |
| 0.05  | -0.02 | -0.02 | 0.01  | 0.61 | 0.66     | 0.27     | 0.64     | NA | NA | NA | NA |
| 0.02  | 0.01  | -0.03 | 0.01  | 0.61 | 0.79     | 0.019    | 0.62     | NA | NA | NA | NA |

|       |       |       |       |      |          |          |          |    |    |    |    |
|-------|-------|-------|-------|------|----------|----------|----------|----|----|----|----|
| -0.07 | -0.09 | -0.05 | -0.02 | 0.61 | 0.17     | 0.13     | 0.66     | NA | NA | NA | NA |
| 0.02  | 0.03  | -0.05 | -0.01 | 0.61 | 0.065    | 1.10E-05 | 0.58     | NA | NA | NA | NA |
| -0.01 | 0     | -0.05 | -0.02 | 0.61 | 1        | 0.00068  | 0.32     | NA | NA | NA | NA |
| 0.12  | -0.06 | -0.06 | -0.01 | 0.61 | 1        | 0.075    | 0.86     | NA | NA | NA | NA |
| -0.02 | -0.02 | -0.05 | 0.01  | 0.62 | 0.53     | 0.00012  | 0.39     | NA | NA | NA | NA |
| -0.03 | 0.16  | 0.01  | 0.12  | 0.62 | 0.011    | 0.85     | 0.00016  | NA | NA | NA | NA |
| 0.03  | 0.02  | 0.01  | 0.02  | 0.62 | 0.67     | 0.48     | 0.22     | NA | NA | NA | NA |
| 0.03  | 0.02  | -0.06 | 0.03  | 0.62 | 0.59     | 0.00082  | 0.25     | NA | NA | NA | NA |
| -0.01 | 0.04  | -0.09 | -0.05 | 0.63 | 0.19     | 0.00025  | 0.13     | NA | NA | NA | NA |
| -0.02 | 0.02  | -0.02 | -0.01 | 0.63 | 0.75     | 0.29     | 0.76     | NA | NA | NA | NA |
| -0.01 | -0.05 | -0.02 | 0     | 0.63 | 0.00071  | 0.059    | 1        | NA | NA | NA | NA |
| -0.01 | 0.04  | -0.02 | 0     | 0.63 | 0.063    | 0.12     | 0.87     | NA | NA | NA | NA |
| -0.04 | -0.09 | 0     | -0.01 | 0.64 | 0.11     | 1        | 0.89     | NA | NA | NA | NA |
| 0.02  | 0.07  | -0.02 | 0.12  | 0.64 | 0.15     | 0.43     | 3.30E-05 | NA | NA | NA | NA |
| 0.02  | -0.03 | -0.05 | 0.03  | 0.65 | 0.35     | 0.045    | 0.19     | NA | NA | NA | NA |
| 0.01  | -0.01 | -0.09 | -0.04 | 0.65 | 0.75     | 1.80E-09 | 0.032    | NA | NA | NA | NA |
| 0.02  | -0.01 | -0.02 | 0.04  | 0.66 | 0.68     | 0.37     | 0.026    | NA | NA | NA | NA |
| 0.01  | 0.01  | -0.02 | 0.05  | 0.66 | 0.79     | 0.13     | 0.00068  | NA | NA | NA | NA |
| 0.05  | 0.16  | -0.04 | -0.03 | 0.67 | 2.70E-06 | 0.097    | 0.23     | NA | NA | NA | NA |
| 0.01  | 0.05  | -0.06 | 0.03  | 0.67 | 0.024    | 0.00039  | 0.076    | NA | NA | NA | NA |
| 0.01  | 0.02  | -0.01 | 0.05  | 0.67 | 0.32     | 0.49     | 0.0072   | NA | NA | NA | NA |
| -0.02 | 0.03  | -0.01 | 0.01  | 0.67 | 0.78     | 0.58     | 0.86     | NA | NA | NA | NA |
| 0.02  | -0.01 | -0.03 | 0.05  | 0.68 | 0.59     | 0.067    | 0.012    | NA | NA | NA | NA |
| 0.02  | 0.01  | -0.23 | -0.13 | 0.68 | 1        | 4.70E-09 | 0.01     | NA | NA | NA | NA |
| 0.01  | 0.05  | -0.02 | 0     | 0.68 | 0.015    | 0.033    | 0.97     | NA | NA | NA | NA |
| 0.01  | -0.03 | 0.01  | 0.06  | 0.68 | 0.29     | 0.56     | 0.001    | NA | NA | NA | NA |
| 0.01  | -0.01 | -0.05 | 0.03  | 0.69 | 0.72     | 0.014    | 0.26     | NA | NA | NA | NA |
| -0.02 | -0.08 | -0.09 | -0.1  | 0.69 | 0.28     | 0.0079   | 0.015    | NA | NA | NA | NA |
| 0.71  | -0.1  | -0.03 | 0.2   | 0.69 | 0.49     | 0.37     | 2.20E-05 | NA | NA | NA | NA |
| -0.02 | 0.06  | -0.05 | -0.03 | 0.7  | 0.024    | 0.014    | 0.16     | NA | NA | NA | NA |

|       |       |       |       |      |          |          |          |    |    |    |    |
|-------|-------|-------|-------|------|----------|----------|----------|----|----|----|----|
| -0.02 | -0.01 | -0.04 | 0.04  | 0.71 | 0.97     | 0.054    | 0.1      | NA | NA | NA | NA |
| -0.02 | 0.03  | -0.04 | 0.07  | 0.71 | 0.54     | 0.1      | 0.0091   | NA | NA | NA | NA |
| -0.01 | -0.04 | 0.02  | 0.09  | 0.72 | 0.1      | 0.46     | 3.20E-05 | NA | NA | NA | NA |
| -0.06 | -0.01 | 0.03  | 0.04  | 0.72 | 0.94     | 0.34     | 0.39     | NA | NA | NA | NA |
| -0.03 | -0.01 | 0     | 0.07  | 0.73 | 0.93     | 0.92     | 0.002    | NA | NA | NA | NA |
| 0.34  | 0.01  | -0.03 | -0.04 | 0.73 | 1        | 0.19     | 0.037    | NA | NA | NA | NA |
| 0.02  | 0.03  | -0.01 | 0.06  | 0.73 | 0.39     | 0.65     | 0.0045   | NA | NA | NA | NA |
| -0.02 | -0.01 | -0.01 | 0.07  | 0.74 | 0.83     | 0.72     | 0.0063   | NA | NA | NA | NA |
| 0.02  | 0.09  | -0.04 | -0.01 | 0.74 | 0.12     | 0.064    | 0.82     | NA | NA | NA | NA |
| 0.01  | 0.02  | 0.03  | 0.01  | 0.74 | 0.2      | 0.035    | 0.19     | NA | NA | NA | NA |
| 0.06  | -0.07 | -0.04 | -0.07 | 0.75 | 0.23     | 0.3      | 0.035    | NA | NA | NA | NA |
| -0.04 | 0.12  | -0.01 | 0.04  | 0.75 | 0.13     | 0.8      | 0.19     | NA | NA | NA | NA |
| -0.01 | -0.05 | 0     | 0.08  | 0.76 | 0.03     | 0.96     | 0.013    | NA | NA | NA | NA |
| -0.16 | -0.13 | 0     | 0.12  | 0.76 | 0.8      | 1        | 0.035    | NA | NA | NA | NA |
| 0     | 0.02  | -0.01 | -0.02 | 0.77 | 0.2      | 0.62     | 0.082    | NA | NA | NA | NA |
| -0.01 | -0.01 | 0.03  | 0.01  | 0.77 | 0.91     | 0.27     | 0.48     | NA | NA | NA | NA |
| 0.01  | 0.01  | -0.05 | -0.04 | 0.77 | 0.73     | 0.0028   | 0.051    | NA | NA | NA | NA |
| 0.06  | 0.03  | 0.03  | 0.13  | 0.78 | 0.81     | 0.27     | 3.00E-05 | NA | NA | NA | NA |
| 0.05  | -0.09 | -0.05 | 0.05  | 0.78 | 0.27     | 0.051    | 0.15     | NA | NA | NA | NA |
| 0.06  | -0.11 | -0.02 | 0.03  | 0.78 | 0.15     | 0.5      | 0.38     | NA | NA | NA | NA |
| -0.04 | -0.08 | -0.07 | 0.05  | 0.78 | 0.71     | 0.00018  | 0.091    | NA | NA | NA | NA |
| 0.01  | 0.07  | -0.08 | 0     | 0.78 | 0.00051  | 1.30E-09 | 0.89     | NA | NA | NA | NA |
| 0.01  | 0.11  | -0.04 | -0.01 | 0.79 | 2.00E-08 | 0.015    | 0.53     | NA | NA | NA | NA |
| -0.01 | 0.05  | -0.02 | 0.02  | 0.79 | 0.017    | 0.18     | 0.38     | NA | NA | NA | NA |
| 0.03  | 0.23  | 0.07  | 0.13  | 0.79 | 0.033    | 0.06     | 0.0016   | NA | NA | NA | NA |
| -0.01 | 0.01  | -0.01 | -0.01 | 0.79 | 0.64     | 0.47     | 0.43     | NA | NA | NA | NA |
| -0.08 | -0.11 | 0.02  | 0.14  | 0.79 | 0.41     | 0.8      | 0.014    | NA | NA | NA | NA |
| 0.01  | 0.01  | -0.06 | 0.01  | 0.79 | 0.51     | 0.00015  | 0.47     | NA | NA | NA | NA |
| -0.03 | -0.03 | -0.02 | 0.02  | 0.8  | 0.53     | 0.38     | 0.46     | NA | NA | NA | NA |
| -0.01 | -0.01 | -0.07 | 0.02  | 0.8  | 0.68     | 5.50E-08 | 0.37     | NA | NA | NA | NA |

|       |       |       |       |      |          |          |         |    |    |    |    |
|-------|-------|-------|-------|------|----------|----------|---------|----|----|----|----|
| 0.04  | 0.01  | -0.06 | 0.03  | 0.8  | 0.92     | 0.14     | 0.56    | NA | NA | NA | NA |
| 0.03  | 0.05  | -0.05 | 0     | 0.8  | 0.32     | 0.068    | 1       | NA | NA | NA | NA |
| 0.02  | 0.04  | -0.04 | 0.03  | 0.81 | 0.41     | 0.00067  | 0.041   | NA | NA | NA | NA |
| 0.08  | 0.42  | -0.02 | -0.06 | 0.81 | 0.16     | 0.71     | 0.27    | NA | NA | NA | NA |
| 0.02  | 0.18  | -0.1  | -0.05 | 0.81 | 0.002    | 0.0059   | 0.14    | NA | NA | NA | NA |
| -0.01 | 0.11  | 0.01  | 0.06  | 0.81 | 0.00045  | 0.81     | 0.0017  | NA | NA | NA | NA |
| 0.01  | 0     | -0.06 | -0.03 | 0.81 | 1        | 0.0021   | 0.2     | NA | NA | NA | NA |
| 0.18  | 0.02  | 0.03  | 0.06  | 0.82 | 1        | 0.49     | 0.3     | NA | NA | NA | NA |
| 0.03  | -0.01 | -0.04 | 0.01  | 0.82 | 1        | 0.2      | 1       | NA | NA | NA | NA |
| 0.06  | 0.26  | -0.11 | -0.03 | 0.82 | 0.064    | 0.0024   | 0.51    | NA | NA | NA | NA |
| 0.22  | 0.13  | -0.03 | 0.08  | 0.82 | 0.063    | 0.54     | 0.048   | NA | NA | NA | NA |
| 0.02  | 0.04  | -0.07 | -0.01 | 0.82 | 0.31     | 0.00019  | 0.82    | NA | NA | NA | NA |
| 0.01  | 0.17  | -0.04 | 0.06  | 0.83 | 2.00E-07 | 0.06     | 0.028   | NA | NA | NA | NA |
| 0.04  | 0.07  | -0.09 | -0.09 | 0.83 | 0.56     | 0.16     | 0.22    | NA | NA | NA | NA |
| -0.01 | 0.04  | -0.06 | 0.01  | 0.83 | 0.41     | 4.70E-06 | 0.69    | NA | NA | NA | NA |
| 0.01  | 0     | -0.02 | 0.04  | 0.84 | 0.94     | 0.14     | 0.0023  | NA | NA | NA | NA |
| 0.2   | -0.05 | -0.11 | 0.04  | 0.84 | 1        | 0.0013   | 0.51    | NA | NA | NA | NA |
| 0.03  | -0.01 | -0.04 | 0.02  | 0.84 | 1        | 0.3      | 0.49    | NA | NA | NA | NA |
| 0.02  | -0.2  | -0.08 | -0.1  | 0.84 | 0.00053  | 0.0041   | 0.00025 | NA | NA | NA | NA |
| 0.02  | -0.02 | -0.06 | -0.07 | 0.85 | 0.82     | 0.049    | 0.12    | NA | NA | NA | NA |
| -0.01 | 0.03  | 0.02  | -0.03 | 0.85 | 0.41     | 0.4      | 0.051   | NA | NA | NA | NA |
| -0.01 | 0.02  | -0.01 | -0.01 | 0.85 | 0.5      | 0.71     | 0.64    | NA | NA | NA | NA |
| 0.01  | 0.2   | -0.1  | -0.04 | 0.86 | 9.80E-08 | 8.70E-05 | 0.18    | NA | NA | NA | NA |
| -0.03 | -0.04 | -0.02 | -0.07 | 0.86 | 0.66     | 0.7      | 0.066   | NA | NA | NA | NA |
| 0.01  | -0.04 | -0.05 | 0.01  | 0.88 | 0.095    | 0.0037   | 0.7     | NA | NA | NA | NA |
| 0.01  | 0     | -0.07 | -0.14 | 0.88 | 1        | 0.1      | 0.00049 | NA | NA | NA | NA |
| 0     | -0.01 | -0.04 | 0.04  | 0.88 | 0.6      | 3.00E-04 | 0.0015  | NA | NA | NA | NA |
| 0.01  | -0.01 | -0.01 | 0.03  | 0.88 | 0.25     | 0.18     | 0.007   | NA | NA | NA | NA |
| -0.01 | 0.01  | -0.02 | 0.03  | 0.89 | 0.82     | 0.34     | 0.05    | NA | NA | NA | NA |
| 0.05  | -0.02 | -0.04 | 0     | 0.89 | 0.97     | 0.42     | 1       | NA | NA | NA | NA |

|       |       |       |       |      |          |          |          |    |    |    |    |
|-------|-------|-------|-------|------|----------|----------|----------|----|----|----|----|
| 0.06  | -0.03 | -0.01 | 0.03  | 0.89 | 1        | 1        | 0.69     | NA | NA | NA | NA |
| -0.01 | 0.2   | -0.05 | -0.01 | 0.9  | 5.90E-08 | 0.0058   | 0.67     | NA | NA | NA | NA |
| -0.01 | -0.01 | 0     | 0.05  | 0.9  | 0.68     | 0.96     | 0.012    | NA | NA | NA | NA |
| 0.01  | -0.03 | 0     | 0.04  | 0.91 | 0.28     | 0.85     | 0.043    | NA | NA | NA | NA |
| 0.01  | 0.07  | -0.04 | -0.03 | 0.91 | 0.095    | 0.0058   | 0.16     | NA | NA | NA | NA |
| 0.59  | -0.05 | -0.06 | 0.06  | 0.91 | 0.96     | 0.1      | 0.14     | NA | NA | NA | NA |
| 0     | 0.04  | -0.03 | 0     | 0.92 | 0.016    | 0.0058   | 0.98     | NA | NA | NA | NA |
| -0.02 | -0.02 | -0.09 | 0.09  | 0.92 | 0.88     | 0.032    | 0.1      | NA | NA | NA | NA |
| 0.01  | 0.01  | -0.03 | 0.03  | 0.92 | 0.7      | 0.055    | 0.097    | NA | NA | NA | NA |
| 0     | 0.01  | -0.04 | 0.01  | 0.92 | 0.68     | 0.00093  | 0.41     | NA | NA | NA | NA |
| 0.02  | 0.05  | -0.04 | -0.02 | 0.92 | 0.46     | 0.096    | 0.51     | NA | NA | NA | NA |
| 0.01  | 0.05  | -0.04 | -0.06 | 0.93 | 0.15     | 0.27     | 0.0091   | NA | NA | NA | NA |
| -0.01 | 0.03  | -0.04 | -0.01 | 0.93 | 0.32     | 0.036    | 0.7      | NA | NA | NA | NA |
| -0.01 | -0.03 | -0.04 | 0.08  | 0.93 | 0.53     | 0.019    | 0.0067   | NA | NA | NA | NA |
| -0.06 | -0.05 | -0.02 | 0.02  | 0.93 | 0.95     | 0.69     | 0.75     | NA | NA | NA | NA |
| -0.05 | -0.08 | -0.01 | 0.06  | 0.94 | 0.019    | 0.73     | 0.08     | NA | NA | NA | NA |
| 0.03  | -0.01 | -0.09 | -0.15 | 0.94 | 0.93     | 0.13     | 0.0012   | NA | NA | NA | NA |
| -0.01 | 0.02  | -0.07 | -0.03 | 0.94 | 0.5      | 3.60E-07 | 0.099    | NA | NA | NA | NA |
| 0.02  | 0.07  | -0.07 | -0.09 | 0.94 | 0.47     | 0.016    | 0.0079   | NA | NA | NA | NA |
| -0.05 | 0.05  | -0.03 | 0.05  | 0.95 | 0.74     | 0.44     | 0.34     | NA | NA | NA | NA |
| 0     | 0.05  | -0.03 | -0.01 | 0.95 | 0.015    | 0.062    | 0.77     | NA | NA | NA | NA |
| 0     | 0     | -0.03 | 0.01  | 0.95 | 0.89     | 0.015    | 0.34     | NA | NA | NA | NA |
| 0     | 0.06  | -0.06 | 0.02  | 0.95 | 0.035    | 1.40E-06 | 0.13     | NA | NA | NA | NA |
| -0.06 | -0.13 | -0.07 | 0.12  | 0.95 | 0.004    | 0.00054  | 3.80E-05 | NA | NA | NA | NA |
| -0.01 | 0     | -0.08 | -0.08 | 0.95 | 1        | 0.00032  | 2.70E-05 | NA | NA | NA | NA |
| 0     | 0.09  | -0.03 | 0.01  | 0.95 | 0.0011   | 0.069    | 0.76     | NA | NA | NA | NA |
| 0.02  | 0.02  | -0.07 | 0.05  | 0.95 | 0.53     | 0.0072   | 0.034    | NA | NA | NA | NA |
| 0     | 0.01  | -0.01 | 0     | 0.96 | 0.52     | 0.47     | 0.91     | NA | NA | NA | NA |
| -0.01 | -0.05 | -0.08 | 0.05  | 0.96 | 0.36     | 0.0068   | 0.11     | NA | NA | NA | NA |
| 0.03  | 0.05  | -0.05 | -0.01 | 0.97 | 0.15     | 0.24     | 0.78     | NA | NA | NA | NA |

|       |       |       |       |      |        |          |          |    |    |    |    |
|-------|-------|-------|-------|------|--------|----------|----------|----|----|----|----|
| 0.01  | 0     | -0.01 | -0.03 | 0.97 | 1      | 0.82     | 0.4      | NA | NA | NA | NA |
| -0.02 | 0.24  | -0.08 | -0.02 | 0.97 | 0.053  | 0.0027   | 0.46     | NA | NA | NA | NA |
| 0.01  | 0     | -0.03 | 0.06  | 0.97 | 1      | 0.078    | 0.0035   | NA | NA | NA | NA |
| 0.03  | -0.02 | 0.01  | 0.04  | 0.97 | 0.99   | 0.72     | 0.092    | NA | NA | NA | NA |
| -0.01 | 0.03  | -0.01 | 0.04  | 0.98 | 0.4    | 0.6      | 0.025    | NA | NA | NA | NA |
| 0.02  | 0     | -0.02 | 0.04  | 0.98 | 1      | 0.57     | 0.2      | NA | NA | NA | NA |
| 0     | -0.03 | -0.01 | 0     | 0.98 | 0.014  | 0.45     | 0.67     | NA | NA | NA | NA |
| 0     | 0     | -0.03 | -0.04 | 0.98 | 1      | 0.05     | 0.0045   | NA | NA | NA | NA |
| 0.04  | -0.09 | -0.05 | -0.16 | 0.98 | 0.16   | 0.88     | 0.78     | NA | NA | NA | NA |
| 0     | -0.01 | -0.02 | -0.01 | 0.98 | 0.85   | 0.18     | 0.69     | NA | NA | NA | NA |
| 0.01  | 0.02  | -0.05 | -0.06 | 0.98 | 0.62   | 0.024    | 0.001    | NA | NA | NA | NA |
| 0.01  | -0.01 | -0.01 | 0     | 0.98 | 0.72   | 0.78     | 1        | NA | NA | NA | NA |
| -0.02 | 0.02  | 0     | -0.03 | 0.98 | 1      | 1        | 0.88     | NA | NA | NA | NA |
| -0.04 | 0.33  | -0.18 | -0.05 | 0.99 | 0.0028 | 7.00E-06 | 0.74     | NA | NA | NA | NA |
| -0.01 | -0.07 | -0.06 | 0.05  | 0.99 | 0.23   | 0.0042   | 0.12     | NA | NA | NA | NA |
| -0.03 | -0.02 | -0.1  | -0.12 | 0.99 | 0.7    | 0.063    | 0.0057   | NA | NA | NA | NA |
| 0     | -0.02 | -0.05 | -0.04 | 0.99 | 0.46   | 0.014    | 0.045    | NA | NA | NA | NA |
| 0     | -0.01 | -0.06 | 0.01  | 0.99 | 0.64   | 4.30E-07 | 0.59     | NA | NA | NA | NA |
| 0.02  | 0.07  | 0     | 0.1   | 0.99 | 0.23   | 1        | 0.055    | NA | NA | NA | NA |
| 0.03  | 0.04  | -0.01 | 0.05  | 0.99 | 0.73   | 0.62     | 0.013    | NA | NA | NA | NA |
| 0.01  | 0.1   | -0.12 | -0.02 | 1    | 0.14   | 5.20E-05 | 0.66     | NA | NA | NA | NA |
| 0.01  | 0.15  | 0.02  | 0.06  | 1    | 0.49   | 0.78     | 0.36     | NA | NA | NA | NA |
| 0     | 0.09  | -0.07 | 0.05  | 1    | 0.15   | 0.015    | 0.37     | NA | NA | NA | NA |
| 0     | 0.07  | -0.04 | -0.03 | 1    | 0.015  | 0.46     | 0.49     | NA | NA | NA | NA |
| -0.01 | 0.03  | -0.1  | -0.12 | 1    | 1      | 9.00E-04 | 3.20E-05 | NA | NA | NA | NA |
| 0     | 0.03  | -0.03 | 0.04  | 1    | 0.15   | 0.12     | 0.11     | NA | NA | NA | NA |
| -0.08 | -0.1  | -0.01 | 0.21  | 1    | 0.8    | 1        | 0.028    | NA | NA | NA | NA |
| 0     | 0.03  | -0.02 | 0.04  | 1    | 0.22   | 0.18     | 0.06     | NA | NA | NA | NA |
| 0.01  | -0.02 | -0.07 | 0.06  | 1    | 0.69   | 0.0012   | 0.033    | NA | NA | NA | NA |
| 0.02  | 0.1   | -0.06 | 0.06  | 1    | 0.48   | 0.073    | 0.14     | NA | NA | NA | NA |

|       |       |       |       |   |          |          |          |    |    |    |    |
|-------|-------|-------|-------|---|----------|----------|----------|----|----|----|----|
| 0     | 0     | -0.04 | 0.03  | 1 | 0.92     | 0.00034  | 0.025    | NA | NA | NA | NA |
| 0.01  | 0     | 0.02  | 0     | 1 | 1        | 0.35     | 1        | NA | NA | NA | NA |
| -0.08 | 0     | -0.06 | 0.14  | 1 | 1        | 0.8      | 0.2      | NA | NA | NA | NA |
| 0     | -0.01 | -0.02 | 0.01  | 1 | 0.49     | 0.28     | 0.46     | NA | NA | NA | NA |
| 0.01  | -0.05 | -0.02 | 0.1   | 1 | 0.27     | 0.44     | 4.60E-06 | NA | NA | NA | NA |
| 0     | 0.02  | -0.03 | 0.04  | 1 | 0.66     | 0.24     | 0.17     | NA | NA | NA | NA |
| 0.01  | -0.13 | -0.11 | 0.04  | 1 | 0.024    | 0.0036   | 0.4      | NA | NA | NA | NA |
| 0     | 0.03  | -0.01 | 0.07  | 1 | 0.81     | 0.72     | 0.069    | NA | NA | NA | NA |
| 0.03  | -0.02 | -0.19 | -0.13 | 1 | 0.66     | 0.00014  | 0.08     | NA | NA | NA | NA |
| 0.02  | 0.07  | -0.04 | 0.17  | 1 | 0.37     | 0.1      | 5.10E-07 | NA | NA | NA | NA |
| -0.01 | 0.01  | -0.04 | 0.03  | 1 | 0.88     | 0.062    | 0.34     | NA | NA | NA | NA |
| 0     | -0.16 | -0.06 | -0.02 | 1 | 0.22     | 0.04     | 0.69     | NA | NA | NA | NA |
| -0.01 | 0.05  | -0.04 | 0.02  | 1 | 0.49     | 0.45     | 0.68     | NA | NA | NA | NA |
| 0.03  | -0.1  | -0.05 | -0.01 | 1 | 0.12     | 0.025    | 0.52     | NA | NA | NA | NA |
| 0     | 0     | -0.08 | 0     | 1 | 0.88     | 1.50E-05 | 1        | NA | NA | NA | NA |
| 0     | 0.02  | -0.01 | -0.01 | 1 | 0.47     | 0.52     | 0.77     | NA | NA | NA | NA |
| 0     | -0.01 | -0.05 | 0.01  | 1 | 0.71     | 3.30E-06 | 0.47     | NA | NA | NA | NA |
| 0     | -0.05 | -0.13 | 0.02  | 1 | 0.15     | 0.0038   | 0.68     | NA | NA | NA | NA |
| 0.01  | 0.07  | -0.06 | 0     | 1 | 0.073    | 0.0032   | 0.88     | NA | NA | NA | NA |
| 0.01  | -0.04 | -0.06 | 0.03  | 1 | 0.61     | 0.014    | 0.42     | NA | NA | NA | NA |
| -0.5  | -0.74 | -0.06 | -0.02 | 1 | 0.6      | 0.034    | 0.82     | NA | NA | NA | NA |
| -0.01 | 0.38  | -0.06 | 0.01  | 1 | 2.10E-06 | 0.0023   | 0.8      | NA | NA | NA | NA |
| 0     | 0     | -0.02 | 0.03  | 1 | 0.99     | 0.044    | 0.016    | NA | NA | NA | NA |
| 0.01  | -0.07 | -0.06 | 0.01  | 1 | 0.11     | 0.0029   | 0.72     | NA | NA | NA | NA |
| 0     | 0.04  | 0.01  | 0.05  | 1 | 0.15     | 0.82     | 0.022    | NA | NA | NA | NA |
| 0.01  | -0.01 | 0     | 0.01  | 1 | 1        | 1        | 1        | NA | NA | NA | NA |
| -0.01 | 0.84  | 0.13  | 0.13  | 1 | 1.00E-04 | 0.037    | 0.011    | NA | NA | NA | NA |
| -0.01 | -0.07 | -0.01 | 0.06  | 1 | 0.74     | 0.8      | 0.18     | NA | NA | NA | NA |
| -0.01 | 0.32  | -0.02 | 0.01  | 1 | 1.80E-07 | 0.67     | 0.8      | NA | NA | NA | NA |
| 0.05  | -0.06 | 0.01  | 0.11  | 1 | 0.4      | 0.62     | 0.00099  | NA | NA | NA | NA |

|       |       |       |       |   |         |          |          |    |    |    |    |
|-------|-------|-------|-------|---|---------|----------|----------|----|----|----|----|
| -0.03 | -0.06 | -0.08 | 0.24  | 1 | 0.95    | 0.068    | 0.0025   | NA | NA | NA | NA |
| 0.03  | -0.15 | 0.01  | -0.02 | 1 | 1       | 1        | 0.72     | NA | NA | NA | NA |
| 0     | -0.01 | -0.04 | 0     | 1 | 0.85    | 0.005    | 0.87     | NA | NA | NA | NA |
| -0.02 | -0.03 | -0.08 | -0.2  | 1 | 1       | 0.46     | 0.0021   | NA | NA | NA | NA |
| 0.02  | 0.01  | 0.02  | 0.03  | 1 | 1       | 0.65     | 0.56     | NA | NA | NA | NA |
| 0.05  | -0.18 | -0.08 | 0.1   | 1 | 0.06    | 0.0067   | 0.013    | NA | NA | NA | NA |
| 0.02  | 0.11  | -0.02 | -0.02 | 1 | 0.42    | 0.78     | 0.95     | NA | NA | NA | NA |
| 0.01  | -0.05 | -0.03 | 0.17  | 1 | 0.28    | 0.15     | 8.90E-07 | NA | NA | NA | NA |
| -0.01 | 0.07  | -0.09 | 0.02  | 1 | 0.2     | 2.00E-07 | 0.38     | NA | NA | NA | NA |
| 0.01  | 0     | 0     | -0.07 | 1 | 1       | 1        | 0.36     | NA | NA | NA | NA |
| 0.01  | -0.07 | -0.21 | -0.08 | 1 | 0.93    | 2.30E-06 | 0.053    | NA | NA | NA | NA |
| 0     | 0.03  | -0.03 | 0.06  | 1 | 0.57    | 0.33     | 0.038    | NA | NA | NA | NA |
| 0     | 0.04  | -0.03 | -0.03 | 1 | 0.041   | 0.21     | 0.17     | NA | NA | NA | NA |
| 0.02  | 0     | 0     | 0.02  | 1 | 1       | 0.99     | 0.6      | NA | NA | NA | NA |
| 0.01  | -0.03 | 0     | 0.04  | 1 | 0.66    | 1        | 0.27     | NA | NA | NA | NA |
| 0.01  | -0.02 | -0.2  | -0.07 | 1 | 1       | 1.30E-05 | 0.41     | NA | NA | NA | NA |
| 0.02  | 0.39  | 0.06  | 0.15  | 1 | 0.006   | 0.25     | 0.021    | NA | NA | NA | NA |
| 0.01  | 0.11  | -0.05 | 0.02  | 1 | 0.015   | 0.48     | 0.75     | NA | NA | NA | NA |
| 0     | 0.47  | -0.02 | 0.05  | 1 | 0.00073 | 0.6      | 0.16     | NA | NA | NA | NA |
| 0.02  | -0.01 | 0     | 0.01  | 1 | 1       | 1        | 1        | NA | NA | NA | NA |
| -0.01 | 0.05  | -0.03 | -0.06 | 1 | 0.84    | 0.49     | 0.23     | NA | NA | NA | NA |
| 0     | 0.01  | -0.04 | 0.02  | 1 | 0.81    | 0.023    | 0.21     | NA | NA | NA | NA |
| 0.02  | 0.13  | 0     | 0.08  | 1 | 0.012   | 1        | 0.24     | NA | NA | NA | NA |
| 0.14  | 0.14  | -0.04 | -0.06 | 1 | 0.29    | 0.18     | 0.28     | NA | NA | NA | NA |
| 0.03  | 0.1   | -0.03 | NA    | 1 | 0.77    | 1        | NA       | NA | NA | NA | NA |
| -0.01 | 0     | -0.06 | -0.01 | 1 | 1       | 0.016    | 0.85     | NA | NA | NA | NA |
| 0     | 0     | -0.02 | 0.03  | 1 | 1       | 0.06     | 0.011    | NA | NA | NA | NA |
| 0.01  | -0.02 | 0     | 0.04  | 1 | 0.68    | 0.84     | 0.0022   | NA | NA | NA | NA |
| 0.01  | 0     | -0.02 | 0.05  | 1 | 1       | 0.59     | 0.15     | NA | NA | NA | NA |
| 0.01  | 0.05  | 0.02  | 0.02  | 1 | 0.48    | 0.66     | 0.68     | NA | NA | NA | NA |



|       |       |       |       |    |       |          |         |    |    |    |    |
|-------|-------|-------|-------|----|-------|----------|---------|----|----|----|----|
| 0.06  | -0.14 | -0.12 | 0.29  | 1  | 0.45  | 0.041    | 0.00023 | NA | NA | NA | NA |
| 0     | 0.03  | -0.08 | 0.02  | 1  | 0.38  | 6.50E-06 | 0.35    | NA | NA | NA | NA |
| 0.1   | 0.45  | 0.01  | 0.03  | 1  | 0.19  | 0.81     | 0.51    | NA | NA | NA | NA |
| 0     | 0.03  | -0.07 | -0.12 | 1  | 0.59  | 0.43     | 0.28    | NA | NA | NA | NA |
| -0.01 | -0.01 | -0.04 | 0.05  | 1  | 0.69  | 0.027    | 0.024   | NA | NA | NA | NA |
| -0.05 | -0.16 | -0.05 | 0.14  | 1  | 0.47  | 0.078    | 0.00019 | NA | NA | NA | NA |
| 0     | 0.06  | -0.06 | -0.01 | 1  | 0.062 | 0.014    | 0.91    | NA | NA | NA | NA |
| -0.01 | -0.04 | -0.06 | 0.01  | 1  | 0.42  | 0.00034  | 0.46    | NA | NA | NA | NA |
| 0     | 0.05  | -0.09 | 0.02  | 1  | 0.66  | 4.30E-06 | 0.69    | NA | NA | NA | NA |
| 0     | -0.04 | -0.03 | 0.02  | 1  | 0.075 | 0.29     | 0.5     | NA | NA | NA | NA |
| 0.11  | 0.86  | 0.04  | 0.23  | 1  | 0.067 | 1        | 0.26    | NA | NA | NA | NA |
| 0     | 0.1   | 0     | 0.05  | 1  | 0.054 | 1        | 0.19    | NA | NA | NA | NA |
| 0     | 0.06  | -0.02 | 0.06  | 1  | 0.11  | 0.43     | 0.0068  | NA | NA | NA | NA |
| -0.01 | 0.04  | -0.08 | 0.01  | 1  | 0.4   | 5.50E-05 | 0.62    | NA | NA | NA | NA |
| NA    | NA    | 0     | 0.11  | NA | NA    | 1        | 0.027   | NA | NA | NA | NA |
| NA    | NA    | NA    | 0.25  | NA | NA    | NA       | 1       | NA | NA | NA | NA |
| NA    | NA    | 0.05  | 0.27  | NA | NA    | 0.21     | 0.26    | NA | NA | NA | NA |
| NA    | 0     | -0.02 | 0.14  | NA | 1     | 0.83     | 0.19    | NA | NA | NA | NA |
| NA    | NA    | NA    | -0.05 | NA | NA    | NA       | 0.8     | NA | NA | NA | NA |
| NA    | NA    | 0.22  | 0.14  | NA | NA    | 0.002    | 0.049   | NA | NA | NA | NA |
| NA    | 0.07  | -0.01 | 0.03  | NA | 0.36  | 0.85     | 0.43    | NA | NA | NA | NA |
| NA    | NA    | -0.08 | NA    | NA | NA    | 0.32     | NA      | NA | NA | NA | NA |
| NA    | NA    | -0.14 | -0.09 | NA | NA    | 0.62     | 0.99    | NA | NA | NA | NA |
| NA    | -0.09 | -0.02 | 0.05  | NA | 0.45  | 0.53     | 0.16    | NA | NA | NA | NA |
| NA    | 0     | NA    | NA    | NA | 1     | NA       | NA      | NA | NA | NA | NA |
| NA    | NA    | -0.23 | 0.5   | NA | NA    | 1        | 1       | NA | NA | NA | NA |
| NA    | NA    | 0     | NA    | NA | NA    | 1        | NA      | NA | NA | NA | NA |
| NA    | 0.1   | -0.1  | -0.03 | NA | 0.84  | 0.16     | 0.81    | NA | NA | NA | NA |
| NA    | NA    | 0.09  | NA    | NA | NA    | 0.58     | NA      | NA | NA | NA | NA |
| NA    | NA    | -0.13 | 0.67  | NA | NA    | 0.24     | 0.76    | NA | NA | NA | NA |

|    |       |       |       |    |       |        |          |    |    |    |    |
|----|-------|-------|-------|----|-------|--------|----------|----|----|----|----|
| NA | NA    | -0.12 | -0.08 | NA | NA    | 0.02   | 0.24     | NA | NA | NA | NA |
| NA | -0.28 | -0.05 | -0.04 | NA | 0.12  | 0.3    | 0.43     | NA | NA | NA | NA |
| NA | NA    | -0.57 | 0     | NA | NA    | 0.53   | 1        | NA | NA | NA | NA |
| NA | NA    | -0.06 | NA    | NA | NA    | 1      | NA       | NA | NA | NA | NA |
| NA | NA    | -0.07 | NA    | NA | NA    | 1      | NA       | NA | NA | NA | NA |
| NA | -0.03 | -0.03 | 0.14  | NA | 0.91  | 0.27   | 4.40E-05 | NA | NA | NA | NA |
| NA | NA    | -0.03 | -0.04 | NA | NA    | 0.83   | 1        | NA | NA | NA | NA |
| NA | -0.33 | -0.08 | 0.05  | NA | 0.83  | 0.0043 | 0.29     | NA | NA | NA | NA |
| NA | NA    | -0.06 | 0.04  | NA | NA    | 0.34   | 1        | NA | NA | NA | NA |
| NA | NA    | -0.34 | -0.3  | NA | NA    | 0.029  | 0.18     | NA | NA | NA | NA |
| NA | NA    | NA    | NA    | NA | NA    | NA     | NA       | NA | NA | NA | NA |
| NA | NA    | 0     | 0.83  | NA | NA    | 1      | 0.61     | NA | NA | NA | NA |
| NA | 0.88  | -0.02 | -0.03 | NA | 0.34  | 0.95   | 0.88     | NA | NA | NA | NA |
| NA | 0.3   | 0.08  | 0.27  | NA | 0.028 | 0.53   | 0.091    | NA | NA | NA | NA |
| NA | NA    | -0.07 | -0.07 | NA | NA    | 0.029  | 0.032    | NA | NA | NA | NA |
| NA | NA    | -0.17 | 0.33  | NA | NA    | 0.87   | 1        | NA | NA | NA | NA |
| NA | 0.11  | -0.07 | 0.08  | NA | 0.9   | 0.28   | 0.42     | NA | NA | NA | NA |
| NA | NA    | 0     | 0.17  | NA | NA    | 1      | 0.0061   | NA | NA | NA | NA |
| NA | -0.15 | -0.02 | 0.06  | NA | 0.83  | 0.51   | 0.27     | NA | NA | NA | NA |
| NA | NA    | 0.33  | NA    | NA | NA    | 0.55   | NA       | NA | NA | NA | NA |
| NA | NA    | 0     | NA    | NA | NA    | 1      | NA       | NA | NA | NA | NA |
| NA | -0.01 | -0.13 | -0.04 | NA | 1     | 0.0016 | 0.46     | NA | NA | NA | NA |
| NA | NA    | -0.02 | NA    | NA | NA    | 1      | NA       | NA | NA | NA | NA |
| NA | 0.14  | -0.17 | NA    | NA | 0.77  | 0.3    | NA       | NA | NA | NA | NA |
| NA | NA    | 0.03  | NA    | NA | NA    | 0.91   | NA       | NA | NA | NA | NA |
| NA | NA    | -0.02 | 0.05  | NA | NA    | 1      | 0.72     | NA | NA | NA | NA |
| NA | NA    | 0.08  | NA    | NA | NA    | 0.47   | NA       | NA | NA | NA | NA |
| NA | NA    | NA    | NA    | NA | NA    | NA     | NA       | NA | NA | NA | NA |
| NA | NA    | 0.11  | 0.4   | NA | NA    | 0.78   | 0.0054   | NA | NA | NA | NA |
| NA | 0     | -0.06 | 0     | NA | 1     | 0.08   | 0.97     | NA | NA | NA | NA |

|       |       |       |       |          |          |          |          |    |    |    |    |
|-------|-------|-------|-------|----------|----------|----------|----------|----|----|----|----|
| NA    | NA    | -0.03 | 0.52  | NA       | NA       | 1        | 0.07     | NA | NA | NA | NA |
| NA    | NA    | -0.5  | 0     | NA       | NA       | 1        | 1        | NA | NA | NA | NA |
| NA    | -0.15 | -0.04 | -0.02 | NA       | 0.22     | 0.28     | 0.7      | NA | NA | NA | NA |
| NA    | 0.29  | 0.03  | 0.03  | NA       | 0.92     | 0.66     | 0.67     | NA | NA | NA | NA |
| NA    | NA    | 0.02  | 0.9   | NA       | NA       | 1        | 5.40E-06 | NA | NA | NA | NA |
| NA    | NA    | NA    | 0     | NA       | NA       | NA       | 1        | NA | NA | NA | NA |
| NA    | NA    | -0.12 | -0.07 | NA       | NA       | 0.011    | 0.2      | NA | NA | NA | NA |
| NA    | NA    | -0.06 | -0.01 | NA       | NA       | 0.58     | 1        | NA | NA | NA | NA |
| 0.16  | 0.08  | 0.01  | 0.1   | 1.40E-09 | 0.00048  | 0.67     | 1.50E-09 | NA | NA | NA | NA |
| -0.29 | -0.36 | 0     | 0.04  | 4.20E-09 | 1.40E-08 | 0.94     | 0.14     | NA | NA | NA | NA |
| 0.19  | 0.07  | -0.07 | -0.03 | 5.60E-08 | 0.0045   | 0.00013  | 0.039    | NA | NA | NA | NA |
| 0.42  | 0.03  | -0.03 | 0.09  | 2.10E-07 | 0.5      | 0.29     | 0.0013   | NA | NA | NA | NA |
| 0.21  | 0.14  | -0.03 | 0     | 2.40E-07 | 0.00026  | 0.092    | 0.98     | NA | NA | NA | NA |
| 0.12  | 0.08  | -0.06 | -0.01 | 4.20E-07 | 0.00021  | 5.90E-05 | 0.69     | NA | NA | NA | NA |
| 0.12  | 0.01  | -0.03 | -0.01 | 6.10E-07 | 0.82     | 0.0012   | 0.2      | NA | NA | NA | NA |
| 0.17  | 0.04  | -0.02 | 0.04  | 7.50E-07 | 0.081    | 0.19     | 0.003    | NA | NA | NA | NA |
| -0.15 | -0.04 | -0.03 | 0.05  | 8.30E-07 | 0.2      | 0.077    | 0.0094   | NA | NA | NA | NA |
| 0.14  | 0.11  | -0.04 | -0.03 | 5.40E-06 | 7.20E-05 | 0.00081  | 0.035    | NA | NA | NA | NA |
| 0.22  | 0.05  | -0.02 | 0.05  | 6.10E-06 | 0.073    | 0.35     | 0.0066   | NA | NA | NA | NA |
| -0.48 | -0.48 | -0.01 | 0.06  | 6.30E-06 | 4.60E-09 | 0.92     | 0.094    | NA | NA | NA | NA |
| -0.16 | -0.14 | -0.06 | -0.03 | 7.40E-06 | 0.0016   | 0.013    | 0.19     | NA | NA | NA | NA |
| 0.44  | 0.28  | -0.14 | -0.07 | 8.70E-06 | 6.20E-05 | 1.90E-06 | 0.12     | NA | NA | NA | NA |
| 0.17  | 0.08  | -0.05 | 0.04  | 8.80E-06 | 0.038    | 0.00077  | 0.0068   | NA | NA | NA | NA |
| 0.15  | 0.01  | -0.02 | -0.01 | 1.10E-05 | 0.73     | 0.049    | 0.56     | NA | NA | NA | NA |
| 0.24  | 0.09  | -0.01 | 0     | 1.20E-05 | 0.1      | 0.44     | 0.85     | NA | NA | NA | NA |
| 0.28  | 0.47  | -0.08 | 0.09  | 1.50E-05 | 1.70E-09 | 0.044    | 0.062    | NA | NA | NA | NA |
| 0.07  | 0.06  | -0.01 | 0     | 3.20E-05 | 0.00031  | 0.61     | 0.79     | NA | NA | NA | NA |
| 0.14  | 0.06  | -0.02 | 0.02  | 6.00E-05 | 0.014    | 0.18     | 0.19     | NA | NA | NA | NA |
| 0.15  | 0.07  | -0.04 | 0.01  | 6.70E-05 | 0.042    | 0.055    | 0.81     | NA | NA | NA | NA |
| 0.1   | 0.06  | -0.02 | 0.04  | 7.50E-05 | 0.00014  | 0.14     | 0.0029   | NA | NA | NA | NA |

|       |       |       |       |          |          |          |          |    |    |    |    |
|-------|-------|-------|-------|----------|----------|----------|----------|----|----|----|----|
| 0.18  | 0.07  | -0.03 | 0     | 1.00E-04 | 0.043    | 0.26     | 0.93     | NA | NA | NA | NA |
| 0.08  | 0.09  | -0.06 | -0.01 | 0.00024  | 8.40E-06 | 3.90E-05 | 0.33     | NA | NA | NA | NA |
| 0.23  | -0.02 | -0.02 | 0.05  | 0.00025  | 0.65     | 0.16     | 0.0089   | NA | NA | NA | NA |
| 0.07  | 0.06  | -0.04 | -0.02 | 3.00E-04 | 0.00036  | 0.0066   | 0.16     | NA | NA | NA | NA |
| 0.25  | 0.02  | 0.02  | 0.16  | 0.00035  | 0.85     | 0.61     | 2.10E-05 | NA | NA | NA | NA |
| 0.15  | 0.14  | -0.03 | 0     | 0.00039  | 1.00E-04 | 0.026    | 1        | NA | NA | NA | NA |
| 0.15  | 0.03  | -0.05 | -0.01 | 0.00042  | 0.28     | 0.0063   | 0.48     | NA | NA | NA | NA |
| 0.13  | 0.2   | -0.06 | 0.01  | 0.00042  | 8.10E-07 | 0.0014   | 0.54     | NA | NA | NA | NA |
| 0.21  | 0.12  | -0.02 | 0.11  | 0.00051  | 0.0045   | 0.45     | 0.0015   | NA | NA | NA | NA |
| 0.17  | 0.04  | -0.04 | 0.03  | 0.00066  | 0.28     | 0.081    | 0.26     | NA | NA | NA | NA |
| 0.23  | 0.04  | -0.06 | 0.08  | 0.00067  | 0.24     | 0.0014   | 0.00065  | NA | NA | NA | NA |
| 0.1   | 0.09  | -0.02 | 0.04  | 0.00068  | 0.00021  | 0.17     | 0.0017   | NA | NA | NA | NA |
| 0.89  | -0.04 | -0.09 | -0.1  | 0.00078  | 1        | 0.24     | 0.22     | NA | NA | NA | NA |
| 0.2   | -0.04 | -0.02 | -0.02 | 0.00092  | 0.43     | 0.31     | 0.54     | NA | NA | NA | NA |
| -0.25 | -0.15 | -0.04 | -0.03 | 0.00099  | 0.1      | 0.079    | 0.34     | NA | NA | NA | NA |
| 0.7   | NA    | -0.03 | 0     | 0.00099  | NA       | 0.74     | 1        | NA | NA | NA | NA |
| 0.19  | 0.09  | 0.01  | 0.05  | 0.0011   | 0.0058   | 0.56     | 0.018    | NA | NA | NA | NA |
| 0.14  | 0.14  | 0.01  | 0.04  | 0.0011   | 6.10E-06 | 0.57     | 0.075    | NA | NA | NA | NA |
| 0.42  | 0.07  | -0.07 | 0     | 0.0012   | 0.55     | 0.06     | 1        | NA | NA | NA | NA |
| 0.09  | 0     | -0.05 | -0.01 | 0.0013   | 0.99     | 0.00014  | 0.49     | NA | NA | NA | NA |
| 0.12  | 0.02  | -0.07 | -0.03 | 0.0016   | 0.57     | 7.00E-06 | 0.047    | NA | NA | NA | NA |
| 0.32  | 0.16  | -0.03 | 0.06  | 0.0016   | 0.0065   | 0.22     | 0.047    | NA | NA | NA | NA |
| 0.09  | 0.02  | -0.01 | 0     | 0.0018   | 0.33     | 0.62     | 1        | NA | NA | NA | NA |
| 0.09  | 0.04  | -0.01 | 0.02  | 0.0018   | 0.063    | 0.72     | 0.19     | NA | NA | NA | NA |
| 0.08  | 0.04  | -0.04 | 0.02  | 0.0018   | 0.016    | 0.0085   | 0.19     | NA | NA | NA | NA |
| 0.27  | -0.11 | -0.02 | 0.07  | 0.002    | 0.037    | 0.4      | 0.0051   | NA | NA | NA | NA |
| 0.17  | 0.02  | -0.06 | 0     | 0.0021   | 0.77     | 0.0042   | 1        | NA | NA | NA | NA |
| 0.09  | 0.07  | -0.04 | -0.04 | 0.0022   | 0.0041   | 0.02     | 0.026    | NA | NA | NA | NA |
| 0.09  | 0.08  | -0.05 | 0     | 0.0024   | 0.087    | 0.03     | 1        | NA | NA | NA | NA |
| 0.18  | -0.09 | -0.07 | 0     | 0.0025   | 0.0068   | 0.00017  | 0.84     | NA | NA | NA | NA |

|       |       |       |       |        |          |          |          |    |    |    |    |
|-------|-------|-------|-------|--------|----------|----------|----------|----|----|----|----|
| 0.18  | 0.01  | 0.01  | 0.04  | 0.0026 | 0.77     | 0.6      | 0.012    | NA | NA | NA | NA |
| -0.24 | -0.32 | -0.02 | -0.11 | 0.0026 | 1.30E-05 | 0.78     | 0.0062   | NA | NA | NA | NA |
| 0.2   | 0.19  | 0.05  | 0.06  | 0.0027 | 0.015    | 0.3      | 0.26     | NA | NA | NA | NA |
| 0.1   | 0.21  | -0.04 | -0.01 | 0.0028 | 2.90E-08 | 0.0015   | 0.43     | NA | NA | NA | NA |
| 0.37  | 0.04  | -0.1  | 0.1   | 0.0034 | 0.66     | 0.0043   | 0.017    | NA | NA | NA | NA |
| 0.08  | 0.03  | -0.04 | -0.04 | 0.0039 | 0.35     | 0.027    | 0.038    | NA | NA | NA | NA |
| 0.06  | 0.03  | -0.04 | 0     | 0.0043 | 0.26     | 0.00036  | 0.78     | NA | NA | NA | NA |
| 0.27  | 0.05  | 0     | 0.01  | 0.0046 | 0.67     | 1        | 0.83     | NA | NA | NA | NA |
| 0.13  | 0.13  | -0.04 | 0.03  | 0.0047 | 0.0016   | 0.34     | 0.59     | NA | NA | NA | NA |
| 0.59  | 0.73  | 0.04  | 0.12  | 0.0048 | 0.0036   | 0.22     | 0.00072  | NA | NA | NA | NA |
| 0.07  | 0.01  | -0.03 | 0.07  | 0.0049 | 0.56     | 0.0077   | 3.70E-07 | NA | NA | NA | NA |
| 0.06  | 0.08  | -0.03 | 0     | 0.005  | 2.80E-06 | 0.003    | 0.87     | NA | NA | NA | NA |
| -0.55 | -0.55 | -0.01 | 0.13  | 0.0053 | 0.16     | 1        | 0.069    | NA | NA | NA | NA |
| 0.4   | 0.11  | 0.07  | 0.01  | 0.0053 | 0.21     | 0.51     | 1        | NA | NA | NA | NA |
| 0.13  | 0.06  | -0.02 | 0.02  | 0.0058 | 0.2      | 0.3      | 0.25     | NA | NA | NA | NA |
| 0.31  | 0.04  | -0.03 | 0.06  | 0.0059 | 0.5      | 0.26     | 0.086    | NA | NA | NA | NA |
| 0.15  | -0.04 | -0.03 | -0.02 | 0.0059 | 0.44     | 0.18     | 0.23     | NA | NA | NA | NA |
| 0.07  | 0.04  | -0.02 | 0.04  | 0.0062 | 0.038    | 0.11     | 0.011    | NA | NA | NA | NA |
| -0.12 | -0.14 | -0.04 | -0.04 | 0.0063 | 4.90E-06 | 0.14     | 0.089    | NA | NA | NA | NA |
| 0.12  | 0.06  | -0.01 | 0.03  | 0.0065 | 0.029    | 0.43     | 0.052    | NA | NA | NA | NA |
| 0.08  | 0.05  | -0.01 | 0.05  | 0.0069 | 0.028    | 0.18     | 1.10E-05 | NA | NA | NA | NA |
| 0.1   | 0.03  | -0.02 | -0.04 | 0.0069 | 0.11     | 0.13     | 0.0059   | NA | NA | NA | NA |
| 0.1   | -0.01 | 0.01  | 0.13  | 0.0071 | 0.9      | 0.76     | 1.40E-07 | NA | NA | NA | NA |
| 0.22  | -0.02 | -0.09 | -0.1  | 0.0079 | 0.86     | 0.011    | 0.002    | NA | NA | NA | NA |
| 0.11  | 0.02  | -0.08 | 0.01  | 0.008  | 0.48     | 1.60E-08 | 0.62     | NA | NA | NA | NA |
| 0.11  | 0.03  | -0.01 | 0.06  | 0.0084 | 0.21     | 0.61     | 0.032    | NA | NA | NA | NA |
| 0.06  | 0.12  | -0.05 | 0.02  | 0.0089 | 6.80E-08 | 0.00034  | 0.15     | NA | NA | NA | NA |
| -0.11 | -0.03 | 0     | 0.05  | 0.01   | 0.62     | 0.98     | 0.086    | NA | NA | NA | NA |
| 0.07  | 0.18  | -0.06 | 0.03  | 0.01   | 2.80E-06 | 0.0085   | 0.32     | NA | NA | NA | NA |
| 0.08  | 0.08  | -0.01 | 0.07  | 0.01   | 0.012    | 0.76     | 0.0023   | NA | NA | NA | NA |

|       |       |       |       |       |          |          |          |    |    |    |    |
|-------|-------|-------|-------|-------|----------|----------|----------|----|----|----|----|
| -0.15 | -0.17 | -0.17 | -0.17 | 0.012 | 0.01     | 3.10E-07 | 4.20E-06 | NA | NA | NA | NA |
| 0.07  | 0.08  | -0.02 | 0     | 0.012 | 7.00E-04 | 0.079    | 0.9      | NA | NA | NA | NA |
| 0.15  | 0.31  | -0.08 | -0.04 | 0.012 | 2.70E-07 | 0.00011  | 0.079    | NA | NA | NA | NA |
| 0.16  | 0.12  | -0.06 | 0.04  | 0.012 | 0.058    | 0.19     | 0.49     | NA | NA | NA | NA |
| 0.26  | 0.02  | 0.02  | 0.02  | 0.013 | 0.96     | 0.67     | 0.67     | NA | NA | NA | NA |
| 0.05  | 0.09  | -0.06 | -0.05 | 0.015 | 3.70E-07 | 2.90E-06 | 0.00017  | NA | NA | NA | NA |
| 0.08  | 0.03  | -0.01 | 0.02  | 0.015 | 0.3      | 0.56     | 0.2      | NA | NA | NA | NA |
| 0.08  | 0.06  | -0.02 | -0.04 | 0.017 | 0.0019   | 0.17     | 0.013    | NA | NA | NA | NA |
| 0.05  | 0.06  | 0.01  | 0.02  | 0.017 | 0.00096  | 0.46     | 0.032    | NA | NA | NA | NA |
| 0.1   | 0.09  | 0.07  | 0.08  | 0.017 | 0.071    | 0.011    | 0.0036   | NA | NA | NA | NA |
| 0.16  | 0.05  | -0.03 | 0     | 0.017 | 0.37     | 0.094    | 0.99     | NA | NA | NA | NA |
| 0.03  | -0.01 | -0.03 | 0.01  | 0.018 | 0.52     | 0.07     | 0.65     | NA | NA | NA | NA |
| 0.21  | -0.04 | 0     | 0.05  | 0.019 | 0.67     | 1        | 0.25     | NA | NA | NA | NA |
| -0.25 | -0.23 | 0.01  | 0.13  | 0.019 | 0.22     | 1        | 0.0095   | NA | NA | NA | NA |
| 0.19  | 0.05  | -0.02 | 0.02  | 0.021 | 0.51     | 0.55     | 0.7      | NA | NA | NA | NA |
| 0.09  | 0.09  | -0.06 | -0.04 | 0.022 | 0.014    | 6.30E-06 | 0.0048   | NA | NA | NA | NA |
| 0.16  | 0.19  | -0.1  | -0.09 | 0.023 | 0.00054  | 0.0015   | 0.0091   | NA | NA | NA | NA |
| 0.47  | -0.1  | -0.11 | -0.03 | 0.023 | 0.007    | 0.00058  | 0.44     | NA | NA | NA | NA |
| 0.05  | 0.1   | -0.03 | 0     | 0.024 | 7.50E-07 | 0.032    | 0.87     | NA | NA | NA | NA |
| 0.08  | 0.09  | -0.01 | 0.02  | 0.024 | 0.0081   | 0.41     | 0.2      | NA | NA | NA | NA |
| 0.15  | 0.08  | -0.06 | -0.03 | 0.026 | 0.69     | 0.14     | 0.51     | NA | NA | NA | NA |
| 0.24  | 0.07  | -0.03 | -0.02 | 0.028 | 0.24     | 0.35     | 0.61     | NA | NA | NA | NA |
| 0.06  | -0.02 | -0.05 | 0.01  | 0.03  | 0.53     | 0.0027   | 0.79     | NA | NA | NA | NA |
| 0.09  | 0.12  | -0.02 | 0.02  | 0.031 | 6.10E-05 | 0.3      | 0.45     | NA | NA | NA | NA |
| -0.3  | 0.12  | -0.18 | -0.15 | 0.032 | 0.84     | 0.028    | 0.26     | NA | NA | NA | NA |
| 0.08  | 0.22  | -0.07 | -0.09 | 0.032 | 9.00E-07 | 0.054    | 0.032    | NA | NA | NA | NA |
| 0.14  | 0.04  | -0.02 | 0.05  | 0.032 | 0.3      | 0.2      | 0.011    | NA | NA | NA | NA |
| -0.1  | -0.02 | -0.03 | 0.02  | 0.032 | 0.63     | 0.024    | 0.17     | NA | NA | NA | NA |
| 0.16  | 0.2   | -0.12 | -0.13 | 0.034 | 0.0038   | 0.00018  | 2.60E-06 | NA | NA | NA | NA |
| 0.07  | -0.05 | -0.07 | 0.01  | 0.035 | 0.0062   | 4.00E-06 | 0.61     | NA | NA | NA | NA |

|       |       |       |       |       |         |          |         |    |    |    |    |
|-------|-------|-------|-------|-------|---------|----------|---------|----|----|----|----|
| 0.08  | 0.02  | -0.05 | -0.02 | 0.038 | 0.85    | 0.022    | 0.33    | NA | NA | NA | NA |
| -0.2  | -0.14 | -0.01 | -0.03 | 0.039 | 0.23    | 0.95     | 0.3     | NA | NA | NA | NA |
| 0.12  | 0.05  | -0.06 | -0.1  | 0.04  | 0.4     | 0.081    | 0.00035 | NA | NA | NA | NA |
| 0.1   | 0.04  | -0.06 | -0.05 | 0.04  | 0.17    | 0.0029   | 0.002   | NA | NA | NA | NA |
| 0.67  | 0.07  | -0.06 | -0.03 | 0.041 | 0.99    | 0.28     | 0.63    | NA | NA | NA | NA |
| 0.06  | 0     | -0.04 | -0.02 | 0.043 | 1       | 0.032    | 0.38    | NA | NA | NA | NA |
| 0.6   | -0.17 | -0.12 | 0.34  | 0.045 | 0.27    | 0.0077   | 0.0041  | NA | NA | NA | NA |
| 0.06  | 0.04  | 0.01  | 0.02  | 0.046 | 0.017   | 0.69     | 0.22    | NA | NA | NA | NA |
| 0.1   | 0     | -0.02 | 0.03  | 0.047 | 1       | 0.23     | 0.18    | NA | NA | NA | NA |
| -0.14 | -0.13 | -0.05 | 0     | 0.047 | 0.0092  | 0.049    | 1       | NA | NA | NA | NA |
| 0.47  | 0.28  | -0.03 | -0.01 | 0.049 | 0.28    | 0.3      | 0.76    | NA | NA | NA | NA |
| 0.12  | 0.04  | -0.11 | 0.07  | 0.05  | 0.47    | 0.012    | 0.17    | NA | NA | NA | NA |
| -0.07 | -0.05 | -0.08 | 0.05  | 0.052 | 0.19    | 0.00024  | 0.064   | NA | NA | NA | NA |
| 0.07  | 0     | -0.03 | 0.05  | 0.052 | 1       | 0.023    | 0.002   | NA | NA | NA | NA |
| 0.1   | 0.06  | -0.1  | -0.05 | 0.054 | 0.18    | 3.30E-05 | 0.054   | NA | NA | NA | NA |
| -0.49 | -0.19 | -0.01 | 0.1   | 0.054 | 0.5     | 0.86     | 0.0036  | NA | NA | NA | NA |
| -0.07 | -0.12 | -0.05 | 0.03  | 0.058 | 0.00046 | 0.0032   | 0.093   | NA | NA | NA | NA |
| 0.06  | 0.13  | -0.08 | -0.04 | 0.06  | 0.0012  | 4.50E-09 | 0.017   | NA | NA | NA | NA |
| 0.22  | -0.01 | -0.05 | 0.07  | 0.062 | 0.94    | 0.17     | 0.071   | NA | NA | NA | NA |
| 0.05  | 0.07  | -0.05 | 0     | 0.064 | 0.013   | 4.40E-06 | 0.88    | NA | NA | NA | NA |
| -0.22 | -0.19 | -0.07 | -0.1  | 0.066 | 0.044   | 0.21     | 0.031   | NA | NA | NA | NA |
| -0.02 | 0     | -0.03 | -0.04 | 0.067 | 0.77    | 0.011    | 0.0028  | NA | NA | NA | NA |
| 0.11  | 0.11  | -0.07 | 0.01  | 0.069 | 0.0057  | 0.00022  | 0.72    | NA | NA | NA | NA |
| 0.3   | -0.03 | -0.03 | 0.02  | 0.069 | 0.79    | 0.36     | 0.71    | NA | NA | NA | NA |
| 0.2   | -0.07 | 0.01  | NA    | 0.074 | 0.62    | 1        | NA      | NA | NA | NA | NA |
| 0.09  | -0.04 | -0.06 | 0     | 0.078 | 0.39    | 0.0026   | 0.91    | NA | NA | NA | NA |
| 0.07  | 0.03  | 0.03  | 0.03  | 0.081 | 0.52    | 0.22     | 0.17    | NA | NA | NA | NA |
| 0.09  | 0.09  | -0.07 | -0.01 | 0.081 | 0.016   | 2.00E-04 | 0.61    | NA | NA | NA | NA |
| 0.21  | 0     | -0.15 | -0.02 | 0.082 | 1       | 3.80E-06 | 0.67    | NA | NA | NA | NA |
| 0.05  | 0.06  | -0.07 | -0.05 | 0.087 | 0.039   | 2.60E-05 | 0.0017  | NA | NA | NA | NA |

|       |       |       |       |       |          |          |          |    |    |    |    |
|-------|-------|-------|-------|-------|----------|----------|----------|----|----|----|----|
| 0.25  | 0.24  | -0.06 | 0.11  | 0.087 | 0.047    | 0.11     | 0.076    | NA | NA | NA | NA |
| 0.3   | -0.05 | -0.01 | 0.07  | 0.088 | 0.69     | 0.81     | 0.11     | NA | NA | NA | NA |
| 0.3   | 0.08  | -0.02 | -0.03 | 0.09  | 0.52     | 0.56     | 0.41     | NA | NA | NA | NA |
| -0.08 | -0.12 | -0.04 | -0.01 | 0.093 | 0.0032   | 0.04     | 0.81     | NA | NA | NA | NA |
| -0.03 | 0.02  | -0.01 | 0     | 0.093 | 0.45     | 0.47     | 0.92     | NA | NA | NA | NA |
| 0.25  | 0.06  | 0     | 0.04  | 0.094 | 0.63     | 1        | 0.22     | NA | NA | NA | NA |
| 0.09  | 0.01  | -0.02 | 0.06  | 0.095 | 0.87     | 0.28     | 0.00056  | NA | NA | NA | NA |
| 0.04  | 0.1   | -0.04 | -0.03 | 0.095 | 1.00E-07 | 0.0023   | 0.04     | NA | NA | NA | NA |
| 0.76  | -0.06 | -0.08 | -0.03 | 0.097 | 0.3      | 0.017    | 0.34     | NA | NA | NA | NA |
| 0.06  | 0.09  | 0.01  | 0.07  | 0.1   | 0.0029   | 0.71     | 0.0015   | NA | NA | NA | NA |
| 0.23  | 0.22  | -0.01 | 0.03  | 0.11  | 0.072    | 0.73     | 0.37     | NA | NA | NA | NA |
| 0.08  | -0.01 | -0.05 | 0     | 0.11  | 0.72     | 0.0012   | 0.87     | NA | NA | NA | NA |
| 0.05  | 0.05  | -0.06 | 0.02  | 0.11  | 0.052    | 0.00013  | 0.31     | NA | NA | NA | NA |
| 0.05  | 0.01  | -0.05 | -0.03 | 0.11  | 0.89     | 0.0062   | 0.064    | NA | NA | NA | NA |
| -0.1  | 0.16  | -0.1  | 0     | 0.12  | 0.066    | 4.70E-05 | 1        | NA | NA | NA | NA |
| 0.05  | 0.09  | -0.05 | -0.05 | 0.12  | 0.012    | 0.0015   | 0.00084  | NA | NA | NA | NA |
| 0.1   | 0.09  | -0.04 | 0.02  | 0.12  | 0.08     | 0.11     | 0.39     | NA | NA | NA | NA |
| 0.06  | 0.11  | -0.06 | -0.04 | 0.12  | 0.014    | 0.00027  | 0.025    | NA | NA | NA | NA |
| 0.07  | 0.01  | -0.06 | -0.05 | 0.12  | 0.88     | 0.0096   | 0.03     | NA | NA | NA | NA |
| 0.06  | 0.02  | -0.01 | 0.03  | 0.13  | 0.42     | 0.6      | 0.11     | NA | NA | NA | NA |
| 0.92  | 0.24  | 0.01  | 0.11  | 0.13  | 0.00028  | 0.89     | 0.0048   | NA | NA | NA | NA |
| 0.12  | 0.11  | -0.01 | 0.02  | 0.13  | 0.25     | 0.97     | 0.64     | NA | NA | NA | NA |
| 0.07  | 0.04  | -0.05 | 0.04  | 0.13  | 0.37     | 0.0021   | 0.027    | NA | NA | NA | NA |
| 0.15  | 0.14  | -0.02 | 0.01  | 0.14  | 0.27     | 0.58     | 0.95     | NA | NA | NA | NA |
| 0.36  | 0.36  | -0.12 | -0.07 | 0.14  | 0.28     | 0.46     | 0.81     | NA | NA | NA | NA |
| 0.07  | 0.03  | -0.12 | -0.17 | 0.14  | 0.81     | 0.013    | 0.0023   | NA | NA | NA | NA |
| 0.25  | 0.05  | 0.01  | 0.18  | 0.14  | 0.87     | 0.99     | 5.20E-08 | NA | NA | NA | NA |
| 0.04  | 0.03  | 0.02  | 0.04  | 0.14  | 0.1      | 0.28     | 0.0028   | NA | NA | NA | NA |
| 0.1   | 0.03  | -0.1  | -0.07 | 0.15  | 0.52     | 1.80E-09 | 7.70E-05 | NA | NA | NA | NA |
| -0.05 | 0.02  | 0     | 0.04  | 0.15  | 0.5      | 1        | 0.062    | NA | NA | NA | NA |



|       |       |       |       |      |          |          |          |    |    |    |    |
|-------|-------|-------|-------|------|----------|----------|----------|----|----|----|----|
| 0.23  | 0.04  | -0.11 | -0.1  | 0.15 | 0.88     | 0.0076   | 0.036    | NA | NA | NA | NA |
| 0.09  | 0.15  | 0.03  | 0.09  | 0.16 | 0.011    | 0.33     | 0.01     | NA | NA | NA | NA |
| -0.04 | -0.02 | -0.11 | -0.03 | 0.16 | 0.51     | 4.50E-09 | 0.2      | NA | NA | NA | NA |
| -0.2  | -0.43 | -0.09 | -0.07 | 0.16 | 1.50E-05 | 0.1      | 0.35     | NA | NA | NA | NA |
| -0.13 | 0.16  | 0.04  | 0.05  | 0.16 | 0.069    | 0.38     | 0.17     | NA | NA | NA | NA |
| -0.07 | 0.12  | -0.05 | -0.05 | 0.17 | 0.023    | 0.23     | 0.2      | NA | NA | NA | NA |
| -0.13 | -0.08 | 0     | 0.03  | 0.17 | 0.29     | 1        | 0.4      | NA | NA | NA | NA |
| 0.23  | 0.08  | -0.11 | -0.37 | 0.17 | 0.59     | 0.16     | 4.20E-07 | NA | NA | NA | NA |
| 0.14  | 0.23  | 0.01  | 0     | 0.17 | 0.059    | 0.9      | 1        | NA | NA | NA | NA |
| 0.02  | 0.11  | -0.05 | -0.02 | 0.18 | 1.10E-07 | 0.00034  | 0.3      | NA | NA | NA | NA |
| 0.09  | 0.04  | -0.06 | 0.04  | 0.18 | 0.26     | 0.0059   | 0.12     | NA | NA | NA | NA |
| 0.7   | 0.06  | 0.04  | 0.1   | 0.18 | 0.57     | 0.21     | 0.00058  | NA | NA | NA | NA |
| -0.73 | -0.8  | -0.11 | -0.09 | 0.18 | 0.28     | 0.06     | 0.84     | NA | NA | NA | NA |
| 0.06  | 0.01  | 0     | 0.06  | 0.18 | 0.81     | 0.91     | 0.011    | NA | NA | NA | NA |
| 0.04  | 0.13  | -0.04 | 0.04  | 0.19 | 0.00086  | 0.011    | 0.028    | NA | NA | NA | NA |
| 0.9   | 0.02  | -0.07 | -0.04 | 0.19 | 0.69     | 0.0056   | 0.072    | NA | NA | NA | NA |
| -0.55 | -0.1  | -0.15 | 0.02  | 0.19 | 1        | 0.00033  | 0.86     | NA | NA | NA | NA |
| -0.04 | 0     | -0.03 | -0.01 | 0.19 | 1        | 0.18     | 0.75     | NA | NA | NA | NA |
| 0.04  | 0.04  | -0.02 | 0.02  | 0.2  | 0.18     | 0.091    | 0.12     | NA | NA | NA | NA |
| 0.09  | 0.09  | 0.02  | 0.03  | 0.2  | 0.089    | 0.44     | 0.21     | NA | NA | NA | NA |
| 0.04  | 0.07  | -0.06 | -0.03 | 0.21 | 0.12     | 0.0048   | 0.18     | NA | NA | NA | NA |
| 0.03  | 0.13  | -0.04 | -0.02 | 0.22 | 2.80E-09 | 0.0052   | 0.16     | NA | NA | NA | NA |
| -0.25 | 0     | -0.15 | 0.15  | 0.22 | 1        | 0.017    | 0.078    | NA | NA | NA | NA |
| 0.05  | 0.06  | 0.01  | 0.14  | 0.22 | 0.31     | 0.67     | 1.90E-07 | NA | NA | NA | NA |
| -0.04 | -0.05 | -0.02 | 0.04  | 0.22 | 0.041    | 0.059    | 0.016    | NA | NA | NA | NA |
| 0.04  | 0     | 0     | 0.03  | 0.22 | 0.99     | 0.94     | 0.084    | NA | NA | NA | NA |
| 0.22  | 0.09  | -0.25 | 0.25  | 0.23 | 1        | 0.0018   | 0.36     | NA | NA | NA | NA |
| -0.09 | 0     | -0.07 | -0.15 | 0.23 | 1        | 0.19     | 0.009    | NA | NA | NA | NA |
| 0.07  | 0.29  | -0.03 | 0.05  | 0.23 | 6.90E-07 | 0.022    | 0.038    | NA | NA | NA | NA |
| 0.04  | 0.07  | -0.01 | 0.05  | 0.24 | 0.0011   | 0.64     | 6.40E-05 | NA | NA | NA | NA |

|       |       |       |       |      |          |          |         |    |    |    |    |
|-------|-------|-------|-------|------|----------|----------|---------|----|----|----|----|
| 0.1   | -0.15 | -0.05 | -0.05 | 0.24 | 0.052    | 0.0095   | 0.015   | NA | NA | NA | NA |
| 0.03  | -0.04 | -0.04 | -0.01 | 0.24 | 0.12     | 0.002    | 0.28    | NA | NA | NA | NA |
| 0.03  | 0.02  | 0     | 0.01  | 0.24 | 0.34     | 1        | 0.46    | NA | NA | NA | NA |
| -0.06 | -0.01 | -0.05 | 0.02  | 0.25 | 0.91     | 0.005    | 0.28    | NA | NA | NA | NA |
| -0.03 | 0.04  | -0.08 | -0.02 | 0.25 | 0.2      | 4.30E-06 | 0.26    | NA | NA | NA | NA |
| 0.05  | 0.04  | -0.06 | 0     | 0.25 | 0.72     | 0.053    | 0.99    | NA | NA | NA | NA |
| 0.03  | 0.01  | -0.04 | -0.01 | 0.25 | 0.51     | 0.0057   | 0.42    | NA | NA | NA | NA |
| 0.03  | 0.07  | -0.01 | 0.04  | 0.26 | 0.00047  | 0.68     | 0.0023  | NA | NA | NA | NA |
| 0.03  | 0.16  | -0.04 | 0     | 0.26 | 9.40E-06 | 8.20E-05 | 0.82    | NA | NA | NA | NA |
| 0.05  | 0     | -0.01 | 0.02  | 0.26 | 0.94     | 0.5      | 0.32    | NA | NA | NA | NA |
| 0.05  | 0.02  | -0.04 | 0.01  | 0.26 | 0.38     | 0.019    | 0.56    | NA | NA | NA | NA |
| -0.11 | 0.17  | -0.02 | 0.02  | 0.26 | 0.00039  | 0.13     | 0.21    | NA | NA | NA | NA |
| -0.05 | -0.06 | -0.01 | 0.01  | 0.26 | 0.11     | 0.51     | 0.57    | NA | NA | NA | NA |
| 0.05  | -0.02 | -0.03 | 0     | 0.26 | 0.57     | 0.079    | 0.99    | NA | NA | NA | NA |
| -0.04 | 0.09  | 0.02  | 0.03  | 0.26 | 0.053    | 0.39     | 0.29    | NA | NA | NA | NA |
| 0.03  | 0.08  | -0.02 | 0.03  | 0.27 | 0.00051  | 0.094    | 0.031   | NA | NA | NA | NA |
| -0.03 | 0.02  | -0.04 | 0.02  | 0.28 | 0.54     | 0.058    | 0.33    | NA | NA | NA | NA |
| 0.02  | 0.03  | -0.04 | -0.02 | 0.28 | 0.11     | 0.0019   | 0.086   | NA | NA | NA | NA |
| 0.03  | 0.04  | 0.03  | 0.06  | 0.28 | 0.058    | 0.11     | 0.00016 | NA | NA | NA | NA |
| 0.28  | 0.53  | -0.1  | -0.06 | 0.28 | 0.45     | 0.1      | 0.17    | NA | NA | NA | NA |
| 0.22  | 0.36  | -0.15 | 0.07  | 0.28 | 0.058    | 0.016    | 0.43    | NA | NA | NA | NA |
| 0.13  | 0.08  | -0.05 | -0.01 | 0.28 | 0.18     | 0.015    | 0.76    | NA | NA | NA | NA |
| 0.18  | 0.11  | -0.06 | 0.03  | 0.29 | 0.47     | 0.62     | 0.85    | NA | NA | NA | NA |
| 0.03  | 0.01  | -0.02 | 0.01  | 0.3  | 0.52     | 0.41     | 0.72    | NA | NA | NA | NA |
| 0.11  | 0     | -0.06 | -0.05 | 0.3  | 1        | 0.012    | 0.044   | NA | NA | NA | NA |
| 0.06  | 0.05  | 0     | 0     | 0.3  | 0.43     | 1        | 1       | NA | NA | NA | NA |
| 0.03  | 0.03  | -0.05 | -0.02 | 0.31 | 0.39     | 0.014    | 0.19    | NA | NA | NA | NA |
| 0.09  | 0.18  | -0.03 | 0     | 0.31 | 3.20E-05 | 0.21     | 0.97    | NA | NA | NA | NA |
| 0.16  | -0.02 | -0.13 | 0.04  | 0.31 | 0.98     | 0.00014  | 0.38    | NA | NA | NA | NA |
| -0.31 | -0.25 | 0.06  | 0     | 0.31 | 0.51     | 0.25     | 1       | NA | NA | NA | NA |

|       |       |       |       |      |          |          |          |    |    |    |    |
|-------|-------|-------|-------|------|----------|----------|----------|----|----|----|----|
| -0.08 | 0.1   | 0     | 0.05  | 0.32 | 0.092    | 1        | 0.06     | NA | NA | NA | NA |
| 0.08  | 0.05  | -0.09 | -0.05 | 0.32 | 0.49     | 0.016    | 0.24     | NA | NA | NA | NA |
| 0.05  | -0.04 | -0.04 | 0     | 0.33 | 0.54     | 0.021    | 0.98     | NA | NA | NA | NA |
| 0.13  | 0.08  | -0.06 | 0.09  | 0.34 | 0.43     | 0.087    | 0.03     | NA | NA | NA | NA |
| 0.1   | 0.06  | -0.01 | 0.05  | 0.35 | 0.24     | 0.62     | 0.007    | NA | NA | NA | NA |
| -0.04 | 0.13  | 0.02  | 0.02  | 0.35 | 0.021    | 0.29     | 0.25     | NA | NA | NA | NA |
| 0.85  | 0.29  | -0.09 | -0.07 | 0.35 | 0.0056   | 0.069    | 0.26     | NA | NA | NA | NA |
| -0.1  | 0.16  | -0.08 | -0.06 | 0.35 | 0.05     | 0.00033  | 0.045    | NA | NA | NA | NA |
| -0.05 | -0.14 | -0.02 | -0.04 | 0.35 | 0.0012   | 0.56     | 0.19     | NA | NA | NA | NA |
| -0.16 | 0.12  | -0.04 | 0.07  | 0.36 | 0.13     | 0.25     | 0.11     | NA | NA | NA | NA |
| 0.04  | -0.05 | -0.08 | -0.03 | 0.36 | 0.085    | 2.20E-07 | 0.046    | NA | NA | NA | NA |
| -0.02 | -0.01 | -0.02 | -0.01 | 0.36 | 0.81     | 0.15     | 0.4      | NA | NA | NA | NA |
| 0.03  | 0     | -0.04 | 0.04  | 0.36 | 0.94     | 0.0045   | 0.017    | NA | NA | NA | NA |
| 0.08  | 0.01  | 0.03  | 0.08  | 0.36 | 1        | 0.24     | 0.0095   | NA | NA | NA | NA |
| -0.02 | 0.01  | -0.05 | 0     | 0.37 | 0.85     | 3.50E-05 | 0.88     | NA | NA | NA | NA |
| 0.1   | 0.01  | -0.03 | 0.2   | 0.37 | 0.98     | 0.39     | 8.00E-07 | NA | NA | NA | NA |
| 0.03  | 0.06  | -0.01 | 0.05  | 0.37 | 0.15     | 0.74     | 0.015    | NA | NA | NA | NA |
| 0.08  | 0.07  | -0.06 | 0.05  | 0.37 | 0.16     | 0.023    | 0.11     | NA | NA | NA | NA |
| 0.09  | 0.13  | 0     | -0.02 | 0.37 | 0.2      | 0.88     | 0.43     | NA | NA | NA | NA |
| 0.07  | 0.32  | -0.09 | 0.07  | 0.37 | 2.40E-05 | 0.0011   | 0.046    | NA | NA | NA | NA |
| 0.03  | 0.1   | -0.03 | 0.02  | 0.37 | 0.00029  | 0.016    | 0.16     | NA | NA | NA | NA |
| 0.11  | 0.06  | -0.09 | 0.01  | 0.38 | 0.38     | 0.00013  | 0.69     | NA | NA | NA | NA |
| 0.06  | 0.02  | -0.08 | -0.03 | 0.38 | 1        | 0.017    | 0.37     | NA | NA | NA | NA |
| 0.04  | 0.01  | -0.01 | 0.04  | 0.38 | 0.58     | 0.39     | 0.0025   | NA | NA | NA | NA |
| -0.05 | -0.05 | -0.04 | 0.02  | 0.38 | 0.074    | 0.013    | 0.34     | NA | NA | NA | NA |
| 0.03  | -0.08 | -0.08 | 0.05  | 0.39 | 0.016    | 0.0017   | 0.077    | NA | NA | NA | NA |
| 0.07  | 0.23  | -0.03 | 0.15  | 0.4  | 0.00012  | 0.35     | 6.60E-06 | NA | NA | NA | NA |
| 0.06  | 0.46  | -0.04 | 0.04  | 0.4  | 0.00023  | 0.013    | 0.092    | NA | NA | NA | NA |
| 0.04  | 0.17  | -0.01 | 0.06  | 0.4  | 0.00019  | 0.6      | 0.013    | NA | NA | NA | NA |
| 0.03  | 0.07  | -0.03 | 0.01  | 0.4  | 0.099    | 0.12     | 0.71     | NA | NA | NA | NA |

|       |       |       |       |      |          |          |          |    |    |    |    |
|-------|-------|-------|-------|------|----------|----------|----------|----|----|----|----|
| -0.04 | -0.09 | -0.07 | 0.01  | 0.4  | 0.0029   | 0.00025  | 0.7      | NA | NA | NA | NA |
| 0.04  | 0.08  | -0.13 | -0.07 | 0.41 | 0.022    | 6.60E-06 | 0.06     | NA | NA | NA | NA |
| 0.16  | 0.36  | -0.05 | 0.04  | 0.41 | 2.60E-05 | 0.19     | 0.31     | NA | NA | NA | NA |
| 0.07  | 0.04  | -0.05 | 0.13  | 0.41 | 0.28     | 0.036    | 0.0065   | NA | NA | NA | NA |
| 0.08  | 0.06  | -0.03 | -0.02 | 0.42 | 0.12     | 0.4      | 0.55     | NA | NA | NA | NA |
| -0.1  | -0.1  | 0.02  | 0.07  | 0.42 | 0.21     | 0.44     | 0.0099   | NA | NA | NA | NA |
| -0.04 | -0.07 | -0.04 | -0.02 | 0.42 | 0.0041   | 0.026    | 0.34     | NA | NA | NA | NA |
| 0.04  | 0.01  | -0.06 | 0.04  | 0.42 | 1        | 0.18     | 0.15     | NA | NA | NA | NA |
| 0.06  | -0.01 | -0.13 | -0.06 | 0.42 | 1        | 1.50E-08 | 0.12     | NA | NA | NA | NA |
| 0.82  | -0.05 | -0.14 | 0.05  | 0.42 | 1        | 2.10E-05 | 0.36     | NA | NA | NA | NA |
| 0.03  | -0.05 | -0.06 | -0.01 | 0.42 | 0.047    | 1.70E-05 | 0.8      | NA | NA | NA | NA |
| 0.22  | NA    | -0.03 | -0.04 | 0.42 | NA       | 0.86     | 0.84     | NA | NA | NA | NA |
| 0.05  | 0.11  | -0.06 | 0.06  | 0.43 | 0.0021   | 7.30E-06 | 0.0037   | NA | NA | NA | NA |
| -0.03 | -0.05 | -0.04 | -0.01 | 0.44 | 0.081    | 0.0038   | 0.64     | NA | NA | NA | NA |
| -0.02 | -0.01 | -0.01 | 0     | 0.44 | 0.61     | 0.61     | 0.91     | NA | NA | NA | NA |
| 0.04  | 0.01  | -0.01 | 0.08  | 0.45 | 0.75     | 0.8      | 5.60E-05 | NA | NA | NA | NA |
| -0.05 | -0.06 | -0.06 | -0.04 | 0.45 | 0.29     | 0.019    | 0.15     | NA | NA | NA | NA |
| 0.04  | 0.03  | -0.02 | 0.02  | 0.45 | 0.43     | 0.35     | 0.57     | NA | NA | NA | NA |
| 0.28  | -0.12 | -0.01 | 0.18  | 0.45 | 0.59     | 0.89     | 2.00E-08 | NA | NA | NA | NA |
| -0.04 | 0.01  | -0.04 | 0.01  | 0.45 | 0.72     | 0.022    | 0.62     | NA | NA | NA | NA |
| 0.07  | 0.05  | -0.07 | -0.07 | 0.45 | 0.75     | 0.12     | 0.12     | NA | NA | NA | NA |
| -0.05 | -0.02 | -0.11 | -0.04 | 0.46 | 0.88     | 0.00026  | 0.15     | NA | NA | NA | NA |
| -0.15 | -0.07 | 0.05  | 0.08  | 0.46 | 0.29     | 0.066    | 0.0032   | NA | NA | NA | NA |
| 0.04  | 0.1   | -0.06 | 0.02  | 0.46 | 0.15     | 0.015    | 0.51     | NA | NA | NA | NA |
| 0.83  | 0.03  | 0.26  | 0.23  | 0.47 | 1        | 0.35     | 0.082    | NA | NA | NA | NA |
| 0.03  | 0.23  | -0.08 | -0.04 | 0.47 | 0.055    | 0.012    | 0.27     | NA | NA | NA | NA |
| -0.02 | 0.01  | -0.07 | -0.05 | 0.47 | 0.99     | 0.014    | 0.028    | NA | NA | NA | NA |
| 0.79  | 0.29  | -0.09 | -0.07 | 0.48 | 0.013    | 0.18     | 0.063    | NA | NA | NA | NA |
| -0.06 | -0.07 | -0.07 | -0.02 | 0.48 | 0.23     | 0.087    | 0.59     | NA | NA | NA | NA |
| 0.03  | 0.11  | 0     | 0     | 0.48 | 9.00E-04 | 0.95     | 0.91     | NA | NA | NA | NA |

|       |       |       |       |      |          |          |         |    |    |    |    |
|-------|-------|-------|-------|------|----------|----------|---------|----|----|----|----|
| 0.06  | 0.28  | -0.06 | 0.05  | 0.49 | 9.60E-07 | 0.0091   | 0.17    | NA | NA | NA | NA |
| 0.05  | 0.03  | -0.08 | 0.07  | 0.49 | 0.6      | 5.10E-05 | 0.0084  | NA | NA | NA | NA |
| 0.24  | 0.06  | -0.05 | 0.04  | 0.49 | 0.56     | 0.07     | 0.28    | NA | NA | NA | NA |
| 0.09  | 0.08  | -0.03 | -0.01 | 0.49 | 0.47     | 0.48     | 0.96    | NA | NA | NA | NA |
| 0.08  | 0.5   | -0.06 | 0.23  | 0.5  | 1.10E-05 | 0.26     | 0.00042 | NA | NA | NA | NA |
| 0.19  | -0.06 | 0.07  | 0.01  | 0.5  | 1        | 0.61     | 0.99    | NA | NA | NA | NA |
| 0.05  | 0.07  | -0.01 | 0     | 0.5  | 0.56     | 0.98     | 1       | NA | NA | NA | NA |
| -0.01 | 0.02  | 0.01  | 0     | 0.51 | 0.28     | 0.38     | 0.83    | NA | NA | NA | NA |
| 0.03  | 0     | -0.05 | -0.03 | 0.51 | 1        | 0.00051  | 0.096   | NA | NA | NA | NA |
| 0.04  | 0.08  | -0.04 | 0.04  | 0.51 | 0.032    | 0.0066   | 0.042   | NA | NA | NA | NA |
| -0.05 | -0.02 | 0.02  | 0.11  | 0.51 | 1        | 0.32     | 0.0012  | NA | NA | NA | NA |
| 0.02  | -0.02 | -0.02 | 0.02  | 0.52 | 0.2      | 0.17     | 0.2     | NA | NA | NA | NA |
| 0.03  | 0.02  | 0     | 0.05  | 0.52 | 0.38     | 0.91     | 0.036   | NA | NA | NA | NA |
| 0.06  | 0.43  | 0     | -0.01 | 0.52 | 7.80E-05 | 1        | 1       | NA | NA | NA | NA |
| 0.02  | 0.05  | -0.11 | -0.07 | 0.53 | 0.16     | 1.20E-05 | 0.0092  | NA | NA | NA | NA |
| 0.02  | 0.05  | -0.04 | 0.02  | 0.53 | 0.24     | 0.0092   | 0.26    | NA | NA | NA | NA |
| -0.05 | 0.18  | -0.06 | 0.06  | 0.53 | 0.68     | 0.072    | 0.2     | NA | NA | NA | NA |
| 0.03  | 0.03  | -0.05 | 0     | 0.53 | 0.3      | 2.80E-05 | 0.87    | NA | NA | NA | NA |
| -0.06 | 0     | -0.05 | NA    | 0.53 | 1        | 0.19     | NA      | NA | NA | NA | NA |
| 0.09  | -0.02 | 0.02  | -0.02 | 0.53 | 0.95     | 0.66     | 0.6     | NA | NA | NA | NA |
| 0.07  | 0.15  | -0.1  | 0.1   | 0.54 | 0.35     | 0.0013   | 0.034   | NA | NA | NA | NA |
| 0.03  | 0.01  | 0.07  | 0.11  | 0.54 | 0.92     | 0.0084   | 0.00022 | NA | NA | NA | NA |
| 0.02  | 0.05  | -0.01 | 0.01  | 0.55 | 0.096    | 0.62     | 0.52    | NA | NA | NA | NA |
| 0.04  | -0.01 | -0.06 | -0.02 | 0.55 | 0.96     | 0.00077  | 0.51    | NA | NA | NA | NA |
| 0.07  | -0.03 | -0.02 | -0.01 | 0.55 | 0.56     | 0.44     | 0.86    | NA | NA | NA | NA |
| 0.02  | 0.12  | -0.04 | 0.02  | 0.55 | 2.00E-05 | 0.00022  | 0.053   | NA | NA | NA | NA |
| -0.1  | -0.18 | -0.03 | 0.03  | 0.55 | 0.2      | 0.32     | 0.51    | NA | NA | NA | NA |
| -0.04 | -0.01 | -0.08 | -0.05 | 0.56 | 0.96     | 1.10E-05 | 0.018   | NA | NA | NA | NA |
| 0.02  | 0.02  | -0.01 | 0.02  | 0.56 | 0.32     | 0.71     | 0.17    | NA | NA | NA | NA |
| 0.03  | 0.11  | -0.01 | 0.02  | 0.58 | 0.022    | 0.78     | 0.29    | NA | NA | NA | NA |

|       |       |       |       |      |          |          |          |    |    |    |    |
|-------|-------|-------|-------|------|----------|----------|----------|----|----|----|----|
| 0.04  | 0.08  | -0.02 | 0.03  | 0.59 | 0.097    | 0.17     | 0.17     | NA | NA | NA | NA |
| 0.02  | 0.02  | -0.02 | 0.02  | 0.59 | 0.49     | 0.2      | 0.064    | NA | NA | NA | NA |
| -0.03 | -0.02 | -0.03 | 0.02  | 0.59 | 0.66     | 0.093    | 0.47     | NA | NA | NA | NA |
| 0.05  | -0.01 | -0.02 | 0     | 0.6  | 0.97     | 0.38     | 0.85     | NA | NA | NA | NA |
| 0.03  | 0.05  | -0.01 | 0.04  | 0.6  | 0.43     | 0.64     | 0.15     | NA | NA | NA | NA |
| -0.03 | 0.16  | -0.08 | -0.04 | 0.6  | 0.0023   | 1.70E-05 | 0.086    | NA | NA | NA | NA |
| -0.02 | 0.04  | -0.05 | 0.03  | 0.6  | 0.14     | 3.70E-06 | 0.041    | NA | NA | NA | NA |
| -0.01 | 0.04  | -0.02 | -0.02 | 0.6  | 0.041    | 0.096    | 0.25     | NA | NA | NA | NA |
| 0.02  | -0.03 | -0.04 | 0.02  | 0.6  | 0.25     | 0.0062   | 0.3      | NA | NA | NA | NA |
| 0.02  | 0.01  | -0.07 | -0.04 | 0.6  | 0.96     | 2.70E-05 | 0.0079   | NA | NA | NA | NA |
| 0.02  | 0.11  | -0.03 | -0.04 | 0.6  | 4.50E-05 | 0.21     | 0.0029   | NA | NA | NA | NA |
| -0.08 | 0.03  | -0.14 | 0.16  | 0.61 | 0.96     | 0.0049   | 0.11     | NA | NA | NA | NA |
| 0.25  | 0     | 0.01  | 0.08  | 0.61 | 1        | 0.64     | 0.0022   | NA | NA | NA | NA |
| 0.04  | -0.06 | 0.01  | 0.06  | 0.61 | 0.2      | 0.65     | 0.05     | NA | NA | NA | NA |
| 0.38  | -0.03 | -0.07 | 0.09  | 0.62 | 0.75     | 0.075    | 0.073    | NA | NA | NA | NA |
| -0.05 | 0.05  | 0.07  | 0.01  | 0.63 | 0.87     | 0.16     | 0.83     | NA | NA | NA | NA |
| 0.11  | 0.19  | 0.48  | -0.05 | 0.64 | 0.034    | 0.012    | 0.12     | NA | NA | NA | NA |
| -0.02 | -0.03 | -0.08 | -0.05 | 0.64 | 0.32     | 1.40E-06 | 0.0017   | NA | NA | NA | NA |
| -0.01 | 0.09  | -0.03 | 0.02  | 0.64 | 3.90E-06 | 0.0029   | 0.12     | NA | NA | NA | NA |
| 0.02  | 0.18  | -0.02 | 0.07  | 0.65 | 1.20E-06 | 0.26     | 0.0012   | NA | NA | NA | NA |
| -0.03 | 0.1   | -0.03 | 0.01  | 0.65 | 0.073    | 0.11     | 0.73     | NA | NA | NA | NA |
| -0.05 | 0.11  | -0.06 | -0.04 | 0.65 | 0.089    | 0.068    | 0.51     | NA | NA | NA | NA |
| 0.18  | 0.19  | 0     | 0.52  | 0.66 | 0.25     | 1        | 9.00E-08 | NA | NA | NA | NA |
| -0.02 | -0.02 | -0.01 | 0.06  | 0.66 | 0.68     | 0.8      | 0.19     | NA | NA | NA | NA |
| -0.01 | 0.01  | -0.05 | -0.07 | 0.67 | 0.61     | 0.0083   | 8.90E-05 | NA | NA | NA | NA |
| 0.01  | -0.04 | -0.06 | -0.03 | 0.67 | 0.043    | 2.00E-05 | 0.089    | NA | NA | NA | NA |
| 0.02  | 0.06  | -0.09 | -0.01 | 0.67 | 0.0062   | 3.20E-09 | 0.61     | NA | NA | NA | NA |
| 0.04  | 0.03  | -0.11 | -0.1  | 0.68 | 0.93     | 0.018    | 0.0065   | NA | NA | NA | NA |
| 0.04  | 0     | -0.04 | 0.03  | 0.68 | 1        | 0.065    | 0.28     | NA | NA | NA | NA |
| 0.02  | 0.12  | -0.04 | 0     | 0.69 | 0.033    | 0.043    | 0.86     | NA | NA | NA | NA |

|       |       |       |       |      |          |         |         |    |    |    |    |
|-------|-------|-------|-------|------|----------|---------|---------|----|----|----|----|
| 0.02  | 0.07  | -0.04 | 0.02  | 0.69 | 0.042    | 0.089   | 0.53    | NA | NA | NA | NA |
| -0.04 | -0.05 | -0.04 | 0.05  | 0.69 | 0.49     | 0.14    | 0.11    | NA | NA | NA | NA |
| 0.13  | 0.04  | -0.05 | -0.09 | 0.69 | 1        | 0.65    | 0.38    | NA | NA | NA | NA |
| -0.05 | -0.04 | -0.06 | 0.01  | 0.7  | 0.79     | 0.031   | 0.95    | NA | NA | NA | NA |
| 0.8   | 0.8   | -0.01 | 0.79  | 0.7  | 0.28     | 0.98    | 0.012   | NA | NA | NA | NA |
| 0.02  | 0.06  | -0.02 | -0.02 | 0.7  | 0.066    | 0.59    | 0.55    | NA | NA | NA | NA |
| 0.01  | 0.08  | -0.02 | 0.05  | 0.71 | 0.0026   | 0.2     | 0.014   | NA | NA | NA | NA |
| 0.02  | 0.06  | -0.02 | 0.02  | 0.72 | 0.052    | 0.29    | 0.28    | NA | NA | NA | NA |
| 0.01  | 0.01  | -0.04 | 0.04  | 0.72 | 0.7      | 0.0042  | 0.01    | NA | NA | NA | NA |
| 0.11  | 0.01  | -0.05 | -0.08 | 0.73 | 1        | 0.35    | 0.09    | NA | NA | NA | NA |
| -0.04 | -0.03 | 0     | 0.06  | 0.73 | 0.87     | 1       | 0.045   | NA | NA | NA | NA |
| 0.02  | -0.01 | -0.04 | -0.02 | 0.74 | 0.91     | 0.098   | 0.29    | NA | NA | NA | NA |
| 0.03  | 0.32  | -0.13 | -0.13 | 0.74 | 7.40E-08 | 0.00017 | 0.00028 | NA | NA | NA | NA |
| 0.05  | 0.02  | -0.11 | 0.01  | 0.75 | 1        | 0.012   | 0.95    | NA | NA | NA | NA |
| 0.03  | 0.11  | -0.02 | -0.01 | 0.75 | 0.002    | 0.25    | 0.49    | NA | NA | NA | NA |
| 0.17  | -0.16 | -0.05 | 0.13  | 0.75 | 0.49     | 0.31    | 0.037   | NA | NA | NA | NA |
| -0.03 | -0.07 | -0.05 | 0.01  | 0.75 | 0.33     | 0.034   | 0.8     | NA | NA | NA | NA |
| 0.04  | 0.18  | -0.05 | 0.04  | 0.76 | 0.05     | 0.036   | 0.13    | NA | NA | NA | NA |
| -0.02 | -0.07 | -0.05 | -0.01 | 0.77 | 0.0076   | 0.015   | 0.86    | NA | NA | NA | NA |
| -0.01 | 0.01  | -0.04 | 0.01  | 0.77 | 0.9      | 0.0038  | 0.34    | NA | NA | NA | NA |
| 0.04  | -0.09 | -0.06 | 0     | 0.77 | 0.58     | 0.28    | 1       | NA | NA | NA | NA |
| 0.01  | 0.1   | -0.04 | 0.03  | 0.77 | 0.0047   | 0.053   | 0.25    | NA | NA | NA | NA |
| -0.02 | -0.01 | -0.04 | -0.01 | 0.77 | 1        | 0.03    | 0.56    | NA | NA | NA | NA |
| -0.08 | -0.08 | 0     | -0.01 | 0.77 | 0.61     | 1       | 0.88    | NA | NA | NA | NA |
| -0.01 | -0.01 | -0.04 | 0.04  | 0.78 | 0.55     | 0.0011  | 0.0025  | NA | NA | NA | NA |
| -0.04 | 0.21  | -0.05 | 0.02  | 0.78 | 0.059    | 0.21    | 0.79    | NA | NA | NA | NA |
| 0.01  | 0.01  | -0.03 | 0.01  | 0.78 | 0.73     | 0.066   | 0.45    | NA | NA | NA | NA |
| 0.02  | 0.06  | -0.02 | 0.02  | 0.78 | 0.15     | 0.37    | 0.39    | NA | NA | NA | NA |
| 0.02  | 0.2   | -0.01 | 0.04  | 0.79 | 0.00015  | 0.32    | 0.031   | NA | NA | NA | NA |
| -0.05 | 0.07  | -0.01 | 0.12  | 0.79 | 0.75     | 0.62    | 0.0015  | NA | NA | NA | NA |

|       |       |       |       |      |          |          |          |    |    |    |    |
|-------|-------|-------|-------|------|----------|----------|----------|----|----|----|----|
| -0.07 | 0.22  | -0.07 | -0.01 | 0.81 | 0.18     | 0.086    | 0.88     | NA | NA | NA | NA |
| -0.01 | 0.14  | -0.03 | 0.02  | 0.81 | 7.10E-07 | 0.065    | 0.35     | NA | NA | NA | NA |
| 0.03  | -0.02 | -0.07 | -0.05 | 0.81 | 0.85     | 0.0056   | 0.025    | NA | NA | NA | NA |
| 0.01  | -0.04 | 0     | 0.02  | 0.81 | 0.039    | 0.86     | 0.095    | NA | NA | NA | NA |
| -0.01 | 0.09  | -0.07 | 0     | 0.82 | 0.18     | 0.0028   | 0.91     | NA | NA | NA | NA |
| -0.01 | 0     | -0.04 | -0.03 | 0.83 | 0.94     | 0.00053  | 0.004    | NA | NA | NA | NA |
| 0.03  | -0.01 | 0.04  | 0     | 0.84 | 0.81     | 0.15     | 0.96     | NA | NA | NA | NA |
| -0.01 | 0.06  | 0.01  | -0.01 | 0.84 | 0.11     | 0.84     | 0.48     | NA | NA | NA | NA |
| 0.01  | 0.06  | -0.03 | -0.02 | 0.86 | 0.071    | 0.14     | 0.39     | NA | NA | NA | NA |
| 0.03  | 0.01  | -0.04 | 0.02  | 0.86 | 1        | 0.074    | 0.56     | NA | NA | NA | NA |
| -0.04 | 0.18  | -0.09 | -0.08 | 0.86 | 0.14     | 0.14     | 0.26     | NA | NA | NA | NA |
| 0.03  | -0.03 | -0.08 | -0.01 | 0.86 | 0.44     | 0.0075   | 0.9      | NA | NA | NA | NA |
| 0.01  | 0.04  | -0.03 | 0.01  | 0.87 | 0.056    | 0.14     | 0.59     | NA | NA | NA | NA |
| 0.05  | -0.04 | -0.05 | 0.03  | 0.87 | 0.87     | 0.18     | 0.57     | NA | NA | NA | NA |
| 0.12  | 0.01  | 0.02  | 0.04  | 0.87 | 0.86     | 0.3      | 0.038    | NA | NA | NA | NA |
| 0.05  | 0.1   | -0.08 | 0.01  | 0.88 | 0.56     | 0.031    | 0.86     | NA | NA | NA | NA |
| -0.04 | -0.02 | -0.03 | 0.12  | 0.88 | 1        | 0.51     | 0.016    | NA | NA | NA | NA |
| -0.05 | 0.19  | 0.01  | 0.16  | 0.88 | 0.006    | 0.96     | 7.70E-08 | NA | NA | NA | NA |
| -0.02 | -0.06 | -0.07 | 0.01  | 0.9  | 0.25     | 0.025    | 0.75     | NA | NA | NA | NA |
| 0.01  | 0.04  | -0.06 | -0.01 | 0.9  | 0.55     | 0.033    | 0.73     | NA | NA | NA | NA |
| 0.02  | 0.03  | 0.01  | 0.02  | 0.91 | 0.63     | 0.87     | 0.57     | NA | NA | NA | NA |
| 0.02  | 0.01  | -0.09 | -0.02 | 0.91 | 0.86     | 0.0017   | 0.62     | NA | NA | NA | NA |
| -0.07 | NA    | -0.01 | 0.07  | 0.91 | NA       | 0.74     | 0.01     | NA | NA | NA | NA |
| -0.01 | 0.01  | -0.01 | 0.03  | 0.91 | 0.62     | 0.73     | 0.088    | NA | NA | NA | NA |
| -0.01 | 0     | -0.01 | -0.02 | 0.92 | 0.92     | 0.46     | 0.16     | NA | NA | NA | NA |
| -0.04 | 0     | -0.02 | 0     | 0.92 | 1        | 0.46     | 1        | NA | NA | NA | NA |
| -0.1  | -0.15 | 0     | 0.01  | 0.92 | 0.72     | 1        | 1        | NA | NA | NA | NA |
| -0.04 | 0.21  | -0.03 | 0.06  | 0.93 | 0.032    | 0.065    | 0.0022   | NA | NA | NA | NA |
| 0.01  | 0.13  | -0.02 | 0.02  | 0.93 | 0.0039   | 0.77     | 0.66     | NA | NA | NA | NA |
| -0.01 | 0.06  | -0.09 | -0.05 | 0.94 | 0.15     | 1.40E-08 | 0.0092   | NA | NA | NA | NA |



|       |       |       |       |      |         |          |          |    |    |    |    |
|-------|-------|-------|-------|------|---------|----------|----------|----|----|----|----|
| -0.01 | 0.12  | 0.02  | 0.04  | 0.94 | 0.0053  | 0.25     | 0.019    | NA | NA | NA | NA |
| -0.02 | 0.8   | -0.02 | 0     | 0.95 | 0.48    | 0.94     | 1        | NA | NA | NA | NA |
| 0.02  | 0     | -0.1  | -0.09 | 0.95 | 1       | 0.013    | 0.044    | NA | NA | NA | NA |
| -0.01 | 0.08  | -0.03 | 0.04  | 0.95 | 0.058   | 0.056    | 0.025    | NA | NA | NA | NA |
| -0.01 | 0.11  | -0.04 | 0     | 0.96 | 0.35    | 0.015    | 0.93     | NA | NA | NA | NA |
| -0.01 | 0     | -0.04 | -0.04 | 0.96 | 1       | 0.13     | 0.066    | NA | NA | NA | NA |
| -0.05 | -0.16 | 0.04  | 0.02  | 0.97 | 0.33    | 0.44     | 0.76     | NA | NA | NA | NA |
| 0.08  | 0.02  | -0.13 | -0.23 | 0.97 | 1       | 0.046    | 0.0042   | NA | NA | NA | NA |
| 0     | 0.09  | -0.04 | 0.01  | 0.97 | 0.014   | 0.0016   | 0.44     | NA | NA | NA | NA |
| -0.03 | -0.02 | 0     | 0.04  | 0.98 | 0.96    | 1        | 0.73     | NA | NA | NA | NA |
| 0.01  | 0.02  | -0.01 | 0.04  | 0.98 | 0.78    | 0.86     | 0.053    | NA | NA | NA | NA |
| 0.01  | 0.03  | -0.01 | 0.04  | 0.98 | 0.76    | 0.95     | 0.2      | NA | NA | NA | NA |
| -0.02 | 0.02  | -0.03 | -0.06 | 0.99 | 0.69    | 0.44     | 0.092    | NA | NA | NA | NA |
| -0.04 | 0.13  | 0.03  | -0.03 | 0.99 | 1       | 0.43     | 0.32     | NA | NA | NA | NA |
| -0.01 | -0.03 | -0.19 | -0.25 | 1    | 0.52    | 5.60E-05 | 2.40E-08 | NA | NA | NA | NA |
| 0.01  | 0     | -0.05 | 0.03  | 1    | 1       | 0.0024   | 0.17     | NA | NA | NA | NA |
| -0.05 | -0.31 | -0.06 | -0.12 | 1    | 0.39    | 0.54     | 0.026    | NA | NA | NA | NA |
| 0     | 0.14  | 0.03  | 0.08  | 1    | 0.25    | 0.46     | 0.017    | NA | NA | NA | NA |
| 0.01  | 0.05  | -0.02 | 0.02  | 1    | 0.3     | 0.58     | 0.57     | NA | NA | NA | NA |
| 0.01  | -0.08 | -0.13 | -0.06 | 1    | 0.056   | 2.70E-05 | 0.074    | NA | NA | NA | NA |
| 0.15  | 0.06  | 0.05  | 0.04  | 1    | 1       | 0.2      | 0.33     | NA | NA | NA | NA |
| 0     | -0.01 | -0.13 | -0.09 | 1    | 1       | 0.00021  | 0.0029   | NA | NA | NA | NA |
| 0.01  | 0.12  | -0.02 | 0.03  | 1    | 0.31    | 0.62     | 0.26     | NA | NA | NA | NA |
| 0.02  | 0.05  | -0.06 | 0.08  | 1    | 1       | 0.074    | 0.022    | NA | NA | NA | NA |
| 0.01  | 0.06  | -0.01 | 0.06  | 1    | 0.03    | 0.54     | 0.00015  | NA | NA | NA | NA |
| 0     | 0.07  | -0.04 | 0.03  | 1    | 0.00036 | 0.0072   | 0.091    | NA | NA | NA | NA |
| 0.01  | -0.01 | -0.03 | -0.05 | 1    | 0.87    | 0.38     | 0.062    | NA | NA | NA | NA |
| 0.04  | NA    | -0.02 | 0.01  | 1    | NA      | 0.56     | 0.88     | NA | NA | NA | NA |
| 0     | 0.01  | -0.02 | 0.01  | 1    | 1       | 0.34     | 0.94     | NA | NA | NA | NA |
| 0.01  | 0.06  | 0.02  | -0.02 | 1    | 0.93    | 0.27     | 0.18     | NA | NA | NA | NA |

|       |       |       |       |   |          |          |          |    |    |    |    |
|-------|-------|-------|-------|---|----------|----------|----------|----|----|----|----|
| -0.04 | -0.03 | 0.07  | NA    | 1 | 1        | 0.099    | NA       | NA | NA | NA | NA |
| 0.04  | NA    | -0.13 | -0.05 | 1 | NA       | 0.29     | 0.87     | NA | NA | NA | NA |
| 0.01  | 0.05  | -0.01 | 0.07  | 1 | 0.14     | 0.75     | 0.0073   | NA | NA | NA | NA |
| 0.01  | 0.07  | -0.23 | -0.2  | 1 | 0.47     | 3.10E-06 | 0.0013   | NA | NA | NA | NA |
| 0     | 0.13  | -0.08 | 0.15  | 1 | 0.053    | 0.00031  | 1.40E-08 | NA | NA | NA | NA |
| 0     | 0.05  | 0.02  | -0.02 | 1 | 0.31     | 0.58     | 0.51     | NA | NA | NA | NA |
| 0     | 0.15  | -0.12 | 0.05  | 1 | 0.00028  | 0.0029   | 0.61     | NA | NA | NA | NA |
| 0     | -0.02 | 0     | 0.19  | 1 | 1        | 1        | 1.60E-05 | NA | NA | NA | NA |
| 0.08  | -0.03 | 0.03  | 0     | 1 | 1        | 0.69     | 1        | NA | NA | NA | NA |
| 0.09  | 0.53  | -0.12 | -0.02 | 1 | 0.1      | 0.039    | 1        | NA | NA | NA | NA |
| 0     | 0     | -0.02 | -0.01 | 1 | 1        | 0.29     | 0.75     | NA | NA | NA | NA |
| -0.01 | 0.06  | -0.01 | 0.1   | 1 | 0.49     | 0.78     | 0.024    | NA | NA | NA | NA |
| 0.02  | 0.02  | -0.15 | -0.01 | 1 | 0.55     | 5.40E-07 | 0.88     | NA | NA | NA | NA |
| 0.01  | 0.29  | 0.01  | -0.02 | 1 | 0.0013   | 0.99     | 0.51     | NA | NA | NA | NA |
| -0.05 | -0.05 | -0.02 | -0.03 | 1 | 1        | 0.74     | 0.58     | NA | NA | NA | NA |
| 0.01  | 0.13  | 0.03  | 0.18  | 1 | 0.15     | 0.39     | 6.60E-06 | NA | NA | NA | NA |
| 0.01  | 0.24  | -0.1  | 0     | 1 | 0.023    | 5.00E-04 | 1        | NA | NA | NA | NA |
| -0.01 | 0     | -0.11 | 0     | 1 | 1        | 1.80E-05 | 0.96     | NA | NA | NA | NA |
| 0     | NA    | -0.2  | NA    | 1 | NA       | 1        | NA       | NA | NA | NA | NA |
| -0.01 | 0.32  | -0.09 | -0.07 | 1 | 7.80E-05 | 0.01     | 0.13     | NA | NA | NA | NA |
| 0     | 0.03  | -0.1  | -0.05 | 1 | 0.28     | 1.30E-06 | 0.064    | NA | NA | NA | NA |
| 0.02  | 0.07  | -0.05 | -0.03 | 1 | 1        | 0.59     | 0.7      | NA | NA | NA | NA |
| -0.04 | 0.02  | 0.02  | 0.28  | 1 | 1        | 0.61     | 1.70E-05 | NA | NA | NA | NA |
| 0.01  | 0.02  | -0.07 | -0.09 | 1 | 0.88     | 0.0033   | 0.0019   | NA | NA | NA | NA |
| 0.02  | 0.02  | -0.09 | 0.04  | 1 | 1        | 0.12     | 0.87     | NA | NA | NA | NA |
| 0.07  | 0.04  | 0     | 0.13  | 1 | 1        | 1        | 0.0022   | NA | NA | NA | NA |
| 0.03  | 0.05  | -0.07 | -0.03 | 1 | 0.57     | 0.0057   | 0.35     | NA | NA | NA | NA |
| 0.03  | 0     | -0.09 | -0.03 | 1 | 1        | 3.70E-07 | 0.23     | NA | NA | NA | NA |
| -0.01 | 0.1   | -0.01 | 0.08  | 1 | 0.21     | 0.65     | 3.50E-06 | NA | NA | NA | NA |
| 0.01  | -0.06 | -0.04 | 0.01  | 1 | 0.14     | 0.21     | 0.68     | NA | NA | NA | NA |

|       |       |       |       |   |          |          |        |    |    |    |    |
|-------|-------|-------|-------|---|----------|----------|--------|----|----|----|----|
| 0     | 0.03  | -0.03 | 0.02  | 1 | 0.36     | 0.11     | 0.2    | NA | NA | NA | NA |
| 0.04  | 0.29  | -0.02 | -0.02 | 1 | 6.30E-09 | 0.26     | 0.41   | NA | NA | NA | NA |
| 0.01  | -0.03 | -0.01 | -0.01 | 1 | 0.7      | 0.46     | 0.75   | NA | NA | NA | NA |
| 0.02  | 0.05  | -0.05 | 0.05  | 1 | 1        | 0.088    | 0.18   | NA | NA | NA | NA |
| 0.05  | 0.22  | 0.02  | 0     | 1 | 0.48     | 0.91     | 1      | NA | NA | NA | NA |
| -0.02 | -0.19 | 0.09  | 0.06  | 1 | 0.12     | 0.087    | 0.17   | NA | NA | NA | NA |
| 0.01  | 0.01  | -0.08 | -0.05 | 1 | 1        | 0.015    | 0.16   | NA | NA | NA | NA |
| -0.01 | 0.05  | -0.11 | 0.07  | 1 | 0.54     | 5.10E-07 | 0.027  | NA | NA | NA | NA |
| -0.01 | 0.15  | -0.04 | 0.01  | 1 | 0.0039   | 0.057    | 0.71   | NA | NA | NA | NA |
| 0.03  | -0.08 | -0.09 | -0.1  | 1 | 0.065    | 0.02     | 0.033  | NA | NA | NA | NA |
| 0.03  | -0.02 | 0.01  | 0.06  | 1 | 1        | 0.81     | 0.034  | NA | NA | NA | NA |
| -0.08 | -0.09 | -0.04 | -0.12 | 1 | 0.86     | 0.76     | 0.11   | NA | NA | NA | NA |
| -0.03 | -0.06 | 0.01  | 0.1   | 1 | 0.43     | 0.75     | 0.0018 | NA | NA | NA | NA |
| 0     | 0     | -0.01 | 0.02  | 1 | 1        | 0.3      | 0.1    | NA | NA | NA | NA |
| 0.01  | 0.08  | -0.06 | 0.08  | 1 | 0.11     | 0.038    | 0.032  | NA | NA | NA | NA |
| 0.01  | 0.21  | -0.06 | 0.05  | 1 | 0.2      | 0.00071  | 0.053  | NA | NA | NA | NA |
| 0.01  | 0     | 0.01  | 0.02  | 1 | 1        | 0.56     | 0.45   | NA | NA | NA | NA |
| -0.02 | -0.12 | -0.04 | -0.08 | 1 | 0.64     | 0.7      | 0.17   | NA | NA | NA | NA |
| -0.17 | 0     | -0.04 | NA    | 1 | 1        | 1        | NA     | NA | NA | NA | NA |
| 0.01  | 0.03  | 0.07  | 0.02  | 1 | 0.34     | 0.13     | 0.35   | NA | NA | NA | NA |
| 0.07  | -0.03 | -0.09 | 0.03  | 1 | 0.36     | 0.00041  | 0.46   | NA | NA | NA | NA |
| 0     | -0.02 | -0.06 | 0.05  | 1 | 0.77     | 0.024    | 0.14   | NA | NA | NA | NA |
| 0.01  | 0.01  | -0.03 | -0.03 | 1 | 1        | 0.22     | 0.19   | NA | NA | NA | NA |
| -0.03 | -0.02 | -0.03 | 0     | 1 | 0.77     | 0.16     | 0.97   | NA | NA | NA | NA |
| 0.01  | 0.06  | -0.02 | 0.02  | 1 | 0.1      | 0.27     | 0.16   | NA | NA | NA | NA |
| 0.33  | 0.33  | -0.09 | -0.04 | 1 | 1        | 0.22     | 0.72   | NA | NA | NA | NA |
| 0     | NA    | NA    | NA    | 1 | NA       | NA       | NA     | NA | NA | NA | NA |
| 0     | 0.02  | -0.03 | 0.04  | 1 | 0.49     | 0.16     | 0.16   | NA | NA | NA | NA |
| 0.04  | 0.29  | -0.06 | 0.09  | 1 | 0.19     | 0.19     | 0.28   | NA | NA | NA | NA |
| 0.01  | 0.16  | -0.04 | 0.07  | 1 | 0.13     | 0.54     | 0.22   | NA | NA | NA | NA |

|       |       |       |       |    |          |          |          |    |    |    |    |
|-------|-------|-------|-------|----|----------|----------|----------|----|----|----|----|
| -0.01 | -0.04 | -0.05 | 0.03  | 1  | 0.49     | 0.039    | 0.19     | NA | NA | NA | NA |
| -0.01 | 0.02  | -0.09 | -0.09 | 1  | 0.9      | 0.0096   | 0.002    | NA | NA | NA | NA |
| -0.06 | 0.81  | 0.08  | 0.22  | 1  | 0.46     | 0.39     | 9.80E-06 | NA | NA | NA | NA |
| -0.01 | -0.1  | -0.05 | -0.01 | 1  | 0.003    | 0.0037   | 0.62     | NA | NA | NA | NA |
| 0.02  | 0.39  | -0.04 | 0.06  | 1  | 0.0033   | 0.089    | 0.068    | NA | NA | NA | NA |
| 0     | 0.03  | 0.05  | 0.09  | 1  | 0.85     | 0.092    | 0.004    | NA | NA | NA | NA |
| NA    | NA    | -0.13 | -0.06 | NA | NA       | 0.01     | 0.45     | NA | NA | NA | NA |
| NA    | 0.03  | -0.26 | -0.21 | NA | 1        | 0.00027  | 0.024    | NA | NA | NA | NA |
| NA    | 0.21  | -0.07 | 0.02  | NA | 0.00041  | 4.20E-05 | 0.32     | NA | NA | NA | NA |
| NA    | 0.04  | -0.01 | -0.04 | NA | 1        | 0.93     | 1        | NA | NA | NA | NA |
| NA    | NA    | NA    | NA    | NA | NA       | NA       | NA       | NA | NA | NA | NA |
| NA    | NA    | 0     | 0     | NA | NA       | 1        | 1        | NA | NA | NA | NA |
| NA    | -0.17 | -0.04 | 0.18  | NA | 1        | 0.35     | 0.0012   | NA | NA | NA | NA |
| NA    | NA    | NA    | NA    | NA | NA       | NA       | NA       | NA | NA | NA | NA |
| NA    | NA    | -0.04 | -0.02 | NA | NA       | 0.71     | 1        | NA | NA | NA | NA |
| NA    | 0.07  | 0.11  | 0.27  | NA | 0.9      | 0.55     | 0.12     | NA | NA | NA | NA |
| NA    | NA    | 0.09  | 0.2   | NA | NA       | 0.56     | 0.0013   | NA | NA | NA | NA |
| NA    | 0.31  | -0.55 | -0.72 | NA | 0.55     | 0.25     | 0.057    | NA | NA | NA | NA |
| NA    | -0.15 | -0.04 | 0.01  | NA | 0.59     | 0.66     | 1        | NA | NA | NA | NA |
| NA    | NA    | -0.11 | -0.07 | NA | NA       | 0.025    | 0.19     | NA | NA | NA | NA |
| NA    | NA    | -0.12 | NA    | NA | NA       | 0.44     | NA       | NA | NA | NA | NA |
| NA    | 0.16  | -0.01 | 0.01  | NA | 5.60E-05 | 0.81     | 0.58     | NA | NA | NA | NA |
| NA    | 0.06  | -0.12 | -0.04 | NA | 0.64     | 0.053    | 0.49     | NA | NA | NA | NA |
| NA    | NA    | -0.1  | 0.03  | NA | NA       | 0.29     | 0.95     | NA | NA | NA | NA |
| NA    | 0.01  | -0.16 | -0.15 | NA | 1        | 0.00065  | 0.0075   | NA | NA | NA | NA |
| NA    | NA    | 0     | NA    | NA | NA       | 1        | NA       | NA | NA | NA | NA |
| NA    | NA    | -0.06 | 0.31  | NA | NA       | 0.13     | 5.00E-04 | NA | NA | NA | NA |
| NA    | 0.02  | 0.03  | 0.12  | NA | 0.96     | 0.39     | 0.0027   | NA | NA | NA | NA |
| NA    | 0.34  | -0.12 | -0.03 | NA | 0.43     | 0.057    | 0.89     | NA | NA | NA | NA |
| NA    | NA    | -0.04 | 0.09  | NA | NA       | 0.34     | 0.13     | NA | NA | NA | NA |

|    |       |       |       |    |      |       |         |    |    |    |    |
|----|-------|-------|-------|----|------|-------|---------|----|----|----|----|
| NA | 0.12  | -0.08 | -0.07 | NA | 0.75 | 0.051 | 0.085   | NA | NA | NA | NA |
| NA | NA    | 0.22  | 0.09  | NA | NA   | 0.044 | 0.59    | NA | NA | NA | NA |
| NA | NA    | -0.05 | -0.08 | NA | NA   | 0.45  | 0.065   | NA | NA | NA | NA |
| NA | NA    | 0.01  | 0.3   | NA | NA   | 0.91  | 0.02    | NA | NA | NA | NA |
| NA | NA    | 0.07  | NA    | NA | NA   | 0.85  | NA      | NA | NA | NA | NA |
| NA | NA    | NA    | NA    | NA | NA   | NA    | NA      | NA | NA | NA | NA |
| NA | 0.81  | -0.18 | 0.04  | NA | 0.46 | 0.025 | 0.86    | NA | NA | NA | NA |
| NA | NA    | -0.03 | -0.01 | NA | NA   | 0.57  | 1       | NA | NA | NA | NA |
| NA | NA    | -0.08 | -0.02 | NA | NA   | 0.58  | 1       | NA | NA | NA | NA |
| NA | NA    | 0     | NA    | NA | NA   | 1     | NA      | NA | NA | NA | NA |
| NA | NA    | NA    | NA    | NA | NA   | NA    | NA      | NA | NA | NA | NA |
| NA | NA    | -0.01 | 0.17  | NA | NA   | 1     | 0.022   | NA | NA | NA | NA |
| NA | -0.12 | -0.41 | -0.33 | NA | 1    | 0.026 | 0.18    | NA | NA | NA | NA |
| NA | NA    | 0.03  | 0.22  | NA | NA   | 0.63  | 0.00016 | NA | NA | NA | NA |
| NA | NA    | -0.14 | 0.11  | NA | NA   | 0.77  | 1       | NA | NA | NA | NA |
| NA | NA    | -0.06 | 0.09  | NA | NA   | 0.036 | 0.00077 | NA | NA | NA | NA |
| NA | NA    | 0     | 0.08  | NA | NA   | 1     | 0.75    | NA | NA | NA | NA |
| NA | NA    | -0.04 | -0.05 | NA | NA   | 0.31  | 0.21    | NA | NA | NA | NA |
| NA | NA    | 0.07  | NA    | NA | NA   | 0.76  | NA      | NA | NA | NA | NA |
| NA | NA    | -0.05 | 0.06  | NA | NA   | 0.74  | 0.88    | NA | NA | NA | NA |
| NA | 0.22  | -0.01 | 0.01  | NA | 1    | 0.92  | 0.96    | NA | NA | NA | NA |
| NA | NA    | -0.33 | -0.19 | NA | NA   | 0.11  | 0.44    | NA | NA | NA | NA |
| NA | 0     | 0.05  | -0.02 | NA | 1    | 0.24  | 0.62    | NA | NA | NA | NA |
| NA | 0.03  | 0.02  | 0.04  | NA | 1    | 0.77  | 0.23    | NA | NA | NA | NA |
| NA | NA    | -0.06 | 0.01  | NA | NA   | 1     | 1       | NA | NA | NA | NA |
| NA | NA    | 0.16  | NA    | NA | NA   | 0.37  | NA      | NA | NA | NA | NA |
| NA | -0.08 | -0.01 | 0.04  | NA | 0.24 | 1     | 0.44    | NA | NA | NA | NA |
| NA | NA    | -0.11 | -0.1  | NA | NA   | 0.046 | 0.091   | NA | NA | NA | NA |
| NA | NA    | NA    | NA    | NA | NA   | NA    | NA      | NA | NA | NA | NA |
| NA | NA    | 0.08  | 0.05  | NA | NA   | 0.94  | 1       | NA | NA | NA | NA |

|       |       |       |       |          |          |          |          |    |    |    |    |
|-------|-------|-------|-------|----------|----------|----------|----------|----|----|----|----|
| NA    | -0.09 | -0.09 | 0.05  | NA       | 0.43     | 0.0095   | 0.32     | NA | NA | NA | NA |
| NA    | NA    | -0.21 | -0.18 | NA       | NA       | 0.001    | 4.40E-06 | NA | NA | NA | NA |
| NA    | NA    | -0.15 | 0.08  | NA       | NA       | 0.0031   | 0.42     | NA | NA | NA | NA |
| NA    | NA    | -0.04 | 0.05  | NA       | NA       | 0.25     | 0.2      | NA | NA | NA | NA |
| NA    | -0.05 | -0.07 | -0.06 | NA       | 1        | 0.054    | 0.15     | NA | NA | NA | NA |
| NA    | NA    | 0     | 0     | NA       | NA       | 1        | 1        | NA | NA | NA | NA |
| NA    | 0.27  | -0.23 | -0.14 | NA       | 1        | 0.067    | 0.62     | NA | NA | NA | NA |
| NA    | -0.03 | -0.03 | -0.03 | NA       | 0.71     | 0.81     | 0.76     | NA | NA | NA | NA |
| NA    | NA    | NA    | NA    | NA       | NA       | NA       | NA       | NA | NA | NA | NA |
| NA    | NA    | -0.28 | -0.23 | NA       | NA       | 9.80E-07 | 0.0013   | NA | NA | NA | NA |
| NA    | NA    | -0.12 | -0.18 | NA       | NA       | 0.22     | 0.047    | NA | NA | NA | NA |
| NA    | NA    | NA    | 0.31  | NA       | NA       | NA       | 0.18     | NA | NA | NA | NA |
| NA    | NA    | NA    | NA    | NA       | NA       | NA       | NA       | NA | NA | NA | NA |
| NA    | NA    | -0.12 | -0.07 | NA       | NA       | 2.00E-07 | 0.028    | NA | NA | NA | NA |
| NA    | NA    | 0.01  | 0.06  | NA       | NA       | 0.99     | 0.68     | NA | NA | NA | NA |
| 0.44  | 0.22  | 0.09  | 0     | 1.20E-09 | 4.30E-06 | 0.045    | 1        | NA | NA | NA | NA |
| 0.24  | 0     | -0.08 | 0.02  | 3.80E-09 | 1        | 0.0024   | 0.57     | NA | NA | NA | NA |
| 0.89  | 0.1   | -0.05 | -0.02 | 6.90E-09 | 0.16     | 0.064    | 0.83     | NA | NA | NA | NA |
| -0.39 | -0.4  | -0.07 | -0.02 | 7.60E-09 | 2.30E-08 | 0.011    | 0.54     | NA | NA | NA | NA |
| -0.41 | -0.02 | 0.05  | 0.44  | 1.60E-08 | 0.99     | 0.14     | 1.20E-08 | NA | NA | NA | NA |
| 0.25  | -0.01 | -0.11 | -0.02 | 4.60E-08 | 0.9      | 1.70E-09 | 0.56     | NA | NA | NA | NA |
| 0.16  | -0.01 | -0.01 | 0     | 4.80E-08 | 0.55     | 0.8      | 0.94     | NA | NA | NA | NA |
| 0.23  | 0.24  | 0.11  | -0.02 | 5.10E-08 | 2.00E-07 | 0.059    | 0.87     | NA | NA | NA | NA |
| -0.39 | -0.11 | -0.21 | -0.2  | 1.90E-07 | 0.15     | 5.20E-05 | 7.00E-04 | NA | NA | NA | NA |
| 0.22  | 0.09  | 0     | 0.11  | 2.60E-07 | 0.0029   | 1        | 1.40E-05 | NA | NA | NA | NA |
| -0.2  | -0.13 | -0.03 | 0.04  | 4.20E-07 | 0.00078  | 0.038    | 0.011    | NA | NA | NA | NA |
| 0.1   | 0.02  | -0.02 | 0.01  | 4.80E-07 | 0.34     | 0.028    | 0.24     | NA | NA | NA | NA |
| 0.27  | 0.29  | -0.05 | 0.06  | 4.80E-07 | 6.20E-08 | 0.18     | 0.2      | NA | NA | NA | NA |
| -0.17 | -0.12 | -0.04 | -0.02 | 5.90E-07 | 0.015    | 0.038    | 0.46     | NA | NA | NA | NA |
| 0.39  | 0.43  | -0.03 | -0.01 | 9.10E-07 | 2.30E-09 | 0.56     | 0.98     | NA | NA | NA | NA |

|       |       |       |       |          |          |          |         |    |    |    |    |
|-------|-------|-------|-------|----------|----------|----------|---------|----|----|----|----|
| -0.09 | 0.02  | -0.07 | -0.05 | 1.30E-06 | 0.51     | 1.00E-05 | 0.0049  | NA | NA | NA | NA |
| -0.62 | -0.18 | -0.04 | 0.05  | 1.70E-06 | 0.35     | 0.1      | 0.18    | NA | NA | NA | NA |
| 0.18  | 0.13  | 0     | 0.06  | 2.50E-06 | 4.60E-05 | 1        | 0.0031  | NA | NA | NA | NA |
| 0.16  | 0.05  | -0.08 | -0.01 | 2.90E-06 | 0.14     | 0.00058  | 0.74    | NA | NA | NA | NA |
| 0.9   | -0.02 | -0.03 | -0.02 | 3.30E-06 | 0.9      | 0.92     | 0.72    | NA | NA | NA | NA |
| -0.9  | -0.87 | -0.08 | 0.06  | 3.40E-06 | 0.00071  | 0.012    | 0.24    | NA | NA | NA | NA |
| 0.13  | 0.08  | -0.02 | -0.01 | 3.50E-06 | 0.00038  | 0.27     | 0.55    | NA | NA | NA | NA |
| 0.29  | 0.14  | -0.04 | 0.07  | 3.60E-06 | 0.0087   | 0.15     | 0.073   | NA | NA | NA | NA |
| -0.14 | -0.1  | -0.05 | 0.03  | 5.00E-06 | 0.0078   | 0.0022   | 0.11    | NA | NA | NA | NA |
| 0.17  | 0.02  | -0.03 | 0.04  | 7.60E-06 | 0.65     | 0.4      | 0.3     | NA | NA | NA | NA |
| 0.43  | 0.03  | -0.06 | -0.03 | 8.10E-06 | 0.52     | 0.0041   | 0.24    | NA | NA | NA | NA |
| 0.09  | 0.01  | -0.01 | 0.01  | 1.10E-05 | 0.83     | 0.35     | 0.54    | NA | NA | NA | NA |
| 0.15  | 0.03  | -0.08 | -0.02 | 1.20E-05 | 0.39     | 6.30E-09 | 0.22    | NA | NA | NA | NA |
| 0.12  | 0.03  | -0.03 | 0.02  | 2.50E-05 | 0.057    | 0.23     | 0.48    | NA | NA | NA | NA |
| 0.11  | 0.11  | -0.07 | -0.06 | 2.80E-05 | 0.00064  | 7.80E-07 | 0.00025 | NA | NA | NA | NA |
| 0.41  | 0.04  | -0.04 | -0.04 | 3.50E-05 | 0.85     | 0.13     | 0.42    | NA | NA | NA | NA |
| 0.33  | 0     | -0.03 | -0.01 | 4.00E-05 | 1        | 0.38     | 0.85    | NA | NA | NA | NA |
| 0.09  | 0.04  | -0.03 | 0.02  | 5.50E-05 | 0.056    | 0.072    | 0.27    | NA | NA | NA | NA |
| 0.16  | 0.15  | -0.07 | -0.06 | 5.70E-05 | 1.30E-05 | 3.70E-05 | 0.0023  | NA | NA | NA | NA |
| 0.14  | 0.1   | -0.06 | 0.02  | 6.70E-05 | 7.00E-04 | 0.011    | 0.52    | NA | NA | NA | NA |
| -0.1  | -0.12 | -0.01 | 0.03  | 6.70E-05 | 6.60E-07 | 0.27     | 0.028   | NA | NA | NA | NA |
| 0.68  | 0.01  | -0.14 | -0.05 | 7.40E-05 | 1        | 3.30E-05 | 0.29    | NA | NA | NA | NA |
| 0.16  | 0.02  | -0.04 | 0.03  | 8.90E-05 | 0.78     | 0.031    | 0.29    | NA | NA | NA | NA |
| 0.07  | 0.07  | -0.01 | 0.03  | 8.90E-05 | 3.70E-05 | 0.53     | 0.03    | NA | NA | NA | NA |
| -0.08 | -0.07 | -0.04 | 0     | 9.40E-05 | 0.00092  | 0.0031   | 0.86    | NA | NA | NA | NA |
| 0.16  | 0.07  | -0.02 | 0.03  | 1.00E-04 | 0.015    | 0.29     | 0.12    | NA | NA | NA | NA |
| -0.07 | -0.04 | 0.04  | 0.04  | 0.00015  | 0.14     | 0.0052   | 0.0017  | NA | NA | NA | NA |
| 0.89  | 0.89  | -0.03 | -0.06 | 0.00017  | 0.00017  | 0.56     | 0.082   | NA | NA | NA | NA |
| -0.09 | -0.01 | -0.04 | -0.02 | 0.00018  | 0.96     | 0.0079   | 0.3     | NA | NA | NA | NA |
| -0.17 | -0.21 | -0.09 | -0.08 | 0.00019  | 2.90E-06 | 0.0068   | 0.034   | NA | NA | NA | NA |

|       |       |       |       |          |          |          |         |    |    |    |    |
|-------|-------|-------|-------|----------|----------|----------|---------|----|----|----|----|
| 0.39  | 0.1   | 0     | 0.06  | 0.00021  | 0.066    | 1        | 0.1     | NA | NA | NA | NA |
| 0.16  | 0     | 0     | 0     | 0.00023  | 1        | 1        | 0.99    | NA | NA | NA | NA |
| 0.64  | 0.64  | -0.44 | -0.39 | 0.00024  | 0.0029   | 0.0092   | 0.027   | NA | NA | NA | NA |
| 0.45  | -0.03 | -0.08 | 0.12  | 0.00025  | 1        | 0.0029   | 0.00061 | NA | NA | NA | NA |
| 0.11  | 0.06  | -0.02 | 0.05  | 0.00025  | 0.043    | 0.31     | 0.015   | NA | NA | NA | NA |
| 0.07  | 0.09  | -0.05 | 0.02  | 0.00039  | 0.00013  | 0.00026  | 0.28    | NA | NA | NA | NA |
| 0.13  | 0.05  | -0.03 | 0.04  | 0.00039  | 0.15     | 0.15     | 0.076   | NA | NA | NA | NA |
| 0.13  | 0.1   | -0.08 | -0.06 | 0.00042  | 0.0055   | 2.30E-05 | 0.0017  | NA | NA | NA | NA |
| 0.18  | -0.01 | -0.06 | 0.03  | 0.00042  | 0.9      | 0.0084   | 0.26    | NA | NA | NA | NA |
| -0.14 | -0.02 | -0.05 | 0     | 0.00048  | 0.6      | 0.042    | 1       | NA | NA | NA | NA |
| -0.16 | -0.02 | -0.12 | -0.01 | 5.00E-04 | 0.8      | 1.70E-07 | 0.85    | NA | NA | NA | NA |
| 0.11  | 0.15  | -0.03 | -0.02 | 0.00053  | 1.20E-06 | 0.091    | 0.2     | NA | NA | NA | NA |
| -0.9  | -0.71 | 0.13  | 0.04  | 0.00056  | 0.012    | 0.062    | 0.73    | NA | NA | NA | NA |
| -0.16 | 0.01  | 0.06  | 0.13  | 0.00057  | 0.99     | 0.14     | 0.00018 | NA | NA | NA | NA |
| -0.1  | -0.11 | -0.04 | -0.04 | 0.00058  | 2.80E-06 | 0.044    | 0.039   | NA | NA | NA | NA |
| -0.22 | -0.06 | -0.09 | 0     | 0.00059  | 0.66     | 0.00055  | 1       | NA | NA | NA | NA |
| -0.17 | 0.05  | -0.06 | -0.01 | 0.00061  | 0.69     | 0.092    | 0.82    | NA | NA | NA | NA |
| -0.18 | -0.16 | -0.02 | -0.04 | 0.00068  | 2.40E-05 | 0.37     | 0.12    | NA | NA | NA | NA |
| 0.27  | 0.13  | 0     | 0.06  | 0.00072  | 0.11     | 1        | 0.065   | NA | NA | NA | NA |
| 0.07  | 0.02  | -0.01 | 0.04  | 0.00072  | 0.35     | 0.23     | 0.00018 | NA | NA | NA | NA |
| 0.11  | 0.1   | -0.03 | 0.02  | 0.00084  | 0.03     | 0.013    | 0.3     | NA | NA | NA | NA |
| 0.11  | 0.06  | -0.05 | -0.01 | 0.00092  | 0.054    | 0.0021   | 0.49    | NA | NA | NA | NA |
| 0.26  | -0.03 | -0.14 | -0.06 | 0.001    | 0.48     | 1.30E-09 | 0.028   | NA | NA | NA | NA |
| 0.07  | 0.02  | 0     | 0     | 0.001    | 0.37     | 0.95     | 0.87    | NA | NA | NA | NA |
| -0.11 | -0.03 | -0.01 | 0.03  | 0.001    | 0.63     | 0.79     | 0.21    | NA | NA | NA | NA |
| 0.11  | 0.18  | -0.08 | -0.03 | 0.001    | 7.40E-06 | 3.20E-05 | 0.24    | NA | NA | NA | NA |
| 0.07  | -0.01 | -0.06 | -0.06 | 0.0011   | 0.6      | 5.70E-05 | 0.00015 | NA | NA | NA | NA |
| -0.33 | -0.19 | 0     | 0.14  | 0.0012   | 0.12     | 1        | 0.00079 | NA | NA | NA | NA |
| 0.18  | 0.05  | -0.03 | -0.01 | 0.0015   | 0.4      | 0.17     | 0.69    | NA | NA | NA | NA |
| 0.06  | 0.06  | -0.02 | 0.01  | 0.0015   | 0.0049   | 0.097    | 0.39    | NA | NA | NA | NA |



|       |       |       |       |        |          |          |          |    |    |    |    |
|-------|-------|-------|-------|--------|----------|----------|----------|----|----|----|----|
| 0.26  | 0.07  | 0.02  | 0.08  | 0.0016 | 0.27     | 0.59     | 0.0069   | NA | NA | NA | NA |
| -0.66 | -0.63 | 0.02  | 0.12  | 0.0016 | 0.0067   | 0.71     | 0.0058   | NA | NA | NA | NA |
| 0.06  | 0.05  | -0.03 | 0.03  | 0.0017 | 0.018    | 0.058    | 0.031    | NA | NA | NA | NA |
| -0.15 | -0.08 | 0     | 0.03  | 0.0017 | 0.023    | 0.98     | 0.11     | NA | NA | NA | NA |
| 0.07  | 0.02  | -0.04 | 0     | 0.0018 | 0.2      | 0.0054   | 1        | NA | NA | NA | NA |
| 0.22  | 0.03  | -0.06 | -0.03 | 0.0018 | 0.52     | 0.015    | 0.38     | NA | NA | NA | NA |
| 0.15  | 0.04  | -0.02 | 0.02  | 0.0019 | 0.25     | 0.42     | 0.49     | NA | NA | NA | NA |
| -0.19 | -0.03 | 0     | 0.11  | 0.002  | 0.91     | 1        | 0.00033  | NA | NA | NA | NA |
| 0.11  | 0.09  | -0.08 | 0.02  | 0.002  | 0.0013   | 1.10E-07 | 0.43     | NA | NA | NA | NA |
| 0.25  | 0.33  | -0.06 | 0.03  | 0.0021 | 0.00039  | 0.029    | 0.31     | NA | NA | NA | NA |
| 0.26  | -0.06 | 0.01  | 0.09  | 0.0021 | 0.06     | 0.83     | 2.00E-04 | NA | NA | NA | NA |
| -0.08 | 0.04  | -0.05 | 0.07  | 0.0021 | 0.23     | 0.006    | 0.00013  | NA | NA | NA | NA |
| 0.25  | 0.03  | -0.07 | 0.06  | 0.0022 | 0.6      | 0.012    | 0.06     | NA | NA | NA | NA |
| 0.09  | 0.02  | -0.04 | 0.01  | 0.0022 | 0.53     | 0.019    | 0.44     | NA | NA | NA | NA |
| 0.09  | 0.08  | 0.02  | 0.08  | 0.0022 | 0.0041   | 0.26     | 2.10E-05 | NA | NA | NA | NA |
| 0.06  | 0.06  | -0.04 | 0.04  | 0.0023 | 0.0014   | 5.00E-05 | 0.00085  | NA | NA | NA | NA |
| -0.06 | -0.04 | -0.05 | 0.01  | 0.0023 | 0.089    | 0.00011  | 0.29     | NA | NA | NA | NA |
| 0.11  | 0.21  | -0.09 | -0.02 | 0.0024 | 6.30E-09 | 0.00014  | 0.57     | NA | NA | NA | NA |
| 0.15  | -0.14 | -0.07 | -0.11 | 0.0025 | 0.0032   | 0.014    | 0.00019  | NA | NA | NA | NA |
| 0.1   | 0.01  | -0.04 | -0.01 | 0.0026 | 0.44     | 0.019    | 0.85     | NA | NA | NA | NA |
| 0.1   | 0     | -0.04 | 0.01  | 0.0026 | 0.99     | 0.013    | 0.6      | NA | NA | NA | NA |
| 0.15  | 0.14  | -0.02 | -0.01 | 0.0027 | 0.0014   | 0.39     | 0.81     | NA | NA | NA | NA |
| 0.06  | 0.02  | 0     | -0.01 | 0.0028 | 0.22     | 0.93     | 0.62     | NA | NA | NA | NA |
| 0.1   | 0.06  | -0.07 | -0.04 | 0.0028 | 0.09     | 3.70E-06 | 0.018    | NA | NA | NA | NA |
| 0.43  | -0.01 | -0.05 | -0.03 | 0.0028 | 0.85     | 0.14     | 0.39     | NA | NA | NA | NA |
| 0.06  | 0.05  | -0.02 | -0.02 | 0.003  | 8.00E-04 | 0.18     | 0.16     | NA | NA | NA | NA |
| 0.07  | 0.09  | -0.06 | -0.01 | 0.003  | 0.0029   | 0.00062  | 0.63     | NA | NA | NA | NA |
| 0.15  | 0.1   | -0.01 | 0.11  | 0.0031 | 0.094    | 0.66     | 0.00017  | NA | NA | NA | NA |
| 0.12  | 0.02  | -0.05 | 0.03  | 0.0031 | 0.47     | 0.038    | 0.22     | NA | NA | NA | NA |
| 0.08  | 0.05  | 0.02  | 0.07  | 0.0033 | 0.054    | 0.25     | 0.00018  | NA | NA | NA | NA |

|       |       |       |       |        |          |          |          |    |    |    |    |
|-------|-------|-------|-------|--------|----------|----------|----------|----|----|----|----|
| -0.37 | 0.41  | -0.08 | -0.06 | 0.0036 | 0.084    | 0.23     | 0.4      | NA | NA | NA | NA |
| -0.06 | -0.05 | -0.03 | 0     | 0.0037 | 0.028    | 0.072    | 0.9      | NA | NA | NA | NA |
| 0.1   | 0.06  | -0.01 | 0.07  | 0.0039 | 0.082    | 0.5      | 0.00021  | NA | NA | NA | NA |
| -0.15 | -0.06 | -0.01 | 0.07  | 0.004  | 0.26     | 0.6      | 0.016    | NA | NA | NA | NA |
| -0.15 | -0.15 | -0.05 | -0.04 | 0.0043 | 0.064    | 0.077    | 0.2      | NA | NA | NA | NA |
| -0.06 | -0.06 | -0.03 | 0     | 0.0048 | 0.015    | 0.023    | 1        | NA | NA | NA | NA |
| -0.11 | -0.1  | 0.01  | 0.04  | 0.0057 | 0.031    | 0.88     | 0.11     | NA | NA | NA | NA |
| 0.2   | 0     | -0.03 | 0.08  | 0.0059 | 1        | 0.25     | 0.021    | NA | NA | NA | NA |
| 0.13  | 0.09  | -0.07 | 0.04  | 0.006  | 0.016    | 0.0018   | 0.049    | NA | NA | NA | NA |
| -0.19 | -0.22 | -0.13 | -0.07 | 0.006  | 0.09     | 0.00049  | 0.062    | NA | NA | NA | NA |
| 0.07  | -0.02 | -0.02 | -0.01 | 0.0061 | 0.15     | 0.37     | 0.52     | NA | NA | NA | NA |
| 0.09  | 0.14  | -0.07 | 0.01  | 0.0064 | 0.0033   | 4.10E-05 | 0.57     | NA | NA | NA | NA |
| 0.35  | -0.2  | -0.01 | 0     | 0.0067 | 0.27     | 0.98     | 1        | NA | NA | NA | NA |
| -0.06 | -0.02 | -0.05 | 0     | 0.0068 | 0.38     | 0.00021  | 1        | NA | NA | NA | NA |
| -0.16 | -0.05 | -0.04 | -0.04 | 0.007  | 0.5      | 0.099    | 0.11     | NA | NA | NA | NA |
| -0.06 | -0.04 | -0.06 | 0     | 0.0071 | 0.062    | 0.00024  | 0.98     | NA | NA | NA | NA |
| 0.04  | 0.05  | -0.08 | -0.03 | 0.0072 | 3.10E-05 | 6.60E-09 | 0.094    | NA | NA | NA | NA |
| -0.07 | -0.04 | -0.01 | 0     | 0.0077 | 0.39     | 0.55     | 1        | NA | NA | NA | NA |
| 0.14  | 0.26  | -0.07 | -0.06 | 0.0081 | 1.20E-08 | 0.1      | 0.13     | NA | NA | NA | NA |
| 0.1   | 0.07  | 0.03  | 0.02  | 0.0082 | 0.066    | 0.15     | 0.26     | NA | NA | NA | NA |
| 0.04  | 0.04  | -0.03 | -0.01 | 0.0083 | 0.0015   | 0.0089   | 0.5      | NA | NA | NA | NA |
| -0.15 | -0.15 | 0     | -0.05 | 0.0084 | 0.0076   | 1        | 0.041    | NA | NA | NA | NA |
| 0.09  | -0.01 | -0.07 | -0.03 | 0.0087 | 0.88     | 2.90E-05 | 0.15     | NA | NA | NA | NA |
| 0.16  | -0.02 | -0.03 | 0.05  | 0.0088 | 0.81     | 0.38     | 0.29     | NA | NA | NA | NA |
| 0.24  | 0.01  | -0.03 | 0.08  | 0.0092 | 1        | 0.64     | 0.14     | NA | NA | NA | NA |
| 0.11  | 0.22  | -0.08 | 0.04  | 0.0096 | 1.90E-06 | 0.074    | 0.43     | NA | NA | NA | NA |
| -0.1  | -0.02 | -0.05 | 0.01  | 0.01   | 0.82     | 0.028    | 0.62     | NA | NA | NA | NA |
| 0.82  | NA    | 0.02  | 0.39  | 0.011  | NA       | 0.75     | 3.50E-05 | NA | NA | NA | NA |
| 0.48  | 0.18  | -0.13 | 0     | 0.012  | 0.18     | 7.10E-06 | 1        | NA | NA | NA | NA |
| -0.83 | -0.5  | -0.26 | -0.1  | 0.012  | 0.08     | 0.03     | 0.55     | NA | NA | NA | NA |

|       |       |       |       |       |          |          |          |    |    |    |    |
|-------|-------|-------|-------|-------|----------|----------|----------|----|----|----|----|
| 0.06  | 0.04  | -0.05 | 0.02  | 0.013 | 0.046    | 0.00035  | 0.35     | NA | NA | NA | NA |
| 0.06  | 0.06  | -0.03 | 0.01  | 0.013 | 0.0098   | 0.0042   | 0.34     | NA | NA | NA | NA |
| -0.07 | -0.01 | -0.09 | -0.02 | 0.013 | 0.95     | 2.60E-08 | 0.31     | NA | NA | NA | NA |
| 0.1   | -0.03 | -0.08 | 0.01  | 0.014 | 0.75     | 0.015    | 0.9      | NA | NA | NA | NA |
| 0.25  | 0.01  | -0.07 | 0.07  | 0.014 | 1        | 0.13     | 0.15     | NA | NA | NA | NA |
| 0.12  | -0.02 | -0.02 | -0.01 | 0.014 | 0.58     | 0.44     | 0.69     | NA | NA | NA | NA |
| -0.16 | -0.14 | -0.04 | 0.05  | 0.015 | 0.04     | 0.14     | 0.14     | NA | NA | NA | NA |
| -0.48 | -0.39 | -0.06 | 0.05  | 0.015 | 0.18     | 0.33     | 0.54     | NA | NA | NA | NA |
| -0.08 | -0.09 | -0.07 | -0.03 | 0.015 | 0.00046  | 0.00028  | 0.19     | NA | NA | NA | NA |
| -0.06 | 0.18  | -0.02 | 0.05  | 0.016 | 3.80E-09 | 0.32     | 0.00095  | NA | NA | NA | NA |
| 0.14  | 0.16  | 0     | 0.04  | 0.016 | 0.0028   | 1        | 0.058    | NA | NA | NA | NA |
| -0.07 | 0.11  | -0.05 | -0.01 | 0.016 | 0.004    | 0.014    | 0.74     | NA | NA | NA | NA |
| -0.22 | -0.08 | -0.06 | 0.05  | 0.017 | 0.43     | 0.0086   | 0.07     | NA | NA | NA | NA |
| -0.05 | -0.01 | -0.06 | -0.02 | 0.017 | 0.85     | 0.0068   | 0.4      | NA | NA | NA | NA |
| -0.12 | -0.08 | -0.03 | 0.13  | 0.017 | 0.14     | 0.08     | 8.70E-09 | NA | NA | NA | NA |
| -0.09 | -0.01 | 0.03  | 0.04  | 0.017 | 0.9      | 0.12     | 0.025    | NA | NA | NA | NA |
| -0.05 | -0.03 | -0.02 | 0     | 0.017 | 0.19     | 0.27     | 0.93     | NA | NA | NA | NA |
| -0.18 | -0.18 | -0.06 | -0.07 | 0.018 | 0.0043   | 0.021    | 0.0066   | NA | NA | NA | NA |
| 0.09  | 0.15  | 0.02  | 0.06  | 0.018 | 6.30E-05 | 0.48     | 0.014    | NA | NA | NA | NA |
| 0.05  | 0     | 0     | 0.01  | 0.019 | 1        | 0.9      | 0.47     | NA | NA | NA | NA |
| -0.07 | 0.03  | 0.08  | 0.1   | 0.019 | 0.36     | 0.00046  | 9.40E-06 | NA | NA | NA | NA |
| -0.06 | -0.09 | -0.02 | 0.02  | 0.02  | 0.00034  | 0.17     | 0.26     | NA | NA | NA | NA |
| -0.05 | -0.01 | -0.07 | -0.01 | 0.022 | 0.91     | 9.30E-05 | 0.5      | NA | NA | NA | NA |
| -0.11 | -0.04 | -0.15 | -0.12 | 0.022 | 0.53     | 2.60E-08 | 2.60E-05 | NA | NA | NA | NA |
| 0.19  | 0.01  | -0.06 | 0.02  | 0.022 | 1        | 0.0029   | 0.5      | NA | NA | NA | NA |
| -0.1  | -0.11 | -0.05 | -0.01 | 0.023 | 0.00065  | 0.0037   | 0.47     | NA | NA | NA | NA |
| 0.19  | -0.01 | -0.03 | 0.11  | 0.023 | 1        | 0.31     | 8.20E-05 | NA | NA | NA | NA |
| -0.06 | -0.02 | 0.03  | 0.04  | 0.023 | 0.57     | 0.14     | 0.037    | NA | NA | NA | NA |
| -0.05 | -0.07 | -0.01 | 0     | 0.023 | 2.40E-06 | 0.42     | 0.7      | NA | NA | NA | NA |
| -0.64 | -0.16 | -0.14 | 0.41  | 0.024 | 0.93     | 0.15     | 0.19     | NA | NA | NA | NA |

|       |       |       |       |       |         |          |          |    |    |    |    |
|-------|-------|-------|-------|-------|---------|----------|----------|----|----|----|----|
| -0.07 | -0.07 | -0.07 | -0.01 | 0.024 | 0.0027  | 2.00E-04 | 0.81     | NA | NA | NA | NA |
| 0.06  | -0.01 | -0.03 | 0     | 0.024 | 0.46    | 0.022    | 0.91     | NA | NA | NA | NA |
| 0.05  | 0.07  | -0.07 | -0.03 | 0.024 | 0.0026  | 1.00E-04 | 0.099    | NA | NA | NA | NA |
| 0.06  | 0.06  | -0.04 | 0.03  | 0.025 | 0.0035  | 0.028    | 0.13     | NA | NA | NA | NA |
| 0.85  | 0.2   | -0.02 | 0.06  | 0.025 | 0.015   | 0.41     | 0.018    | NA | NA | NA | NA |
| -0.2  | 0.08  | 0.03  | 0.05  | 0.026 | 0.36    | 0.71     | 1        | NA | NA | NA | NA |
| -0.15 | 0     | 0     | -0.05 | 0.026 | 1       | 1        | 0.17     | NA | NA | NA | NA |
| -0.11 | -0.12 | -0.05 | 0.02  | 0.026 | 0.0069  | 0.019    | 0.55     | NA | NA | NA | NA |
| -0.76 | NA    | 0.03  | 0.9   | 0.027 | NA      | 0.71     | 4.10E-06 | NA | NA | NA | NA |
| -0.07 | -0.09 | -0.04 | -0.01 | 0.028 | 0.0033  | 0.16     | 0.82     | NA | NA | NA | NA |
| 0.09  | 0.1   | 0.01  | 0.03  | 0.028 | 0.0014  | 0.78     | 0.13     | NA | NA | NA | NA |
| -0.13 | -0.06 | -0.08 | -0.02 | 0.028 | 0.12    | 2.10E-06 | 0.39     | NA | NA | NA | NA |
| 0.53  | 0.22  | -0.05 | -0.1  | 0.029 | 0.17    | 0.34     | 0.023    | NA | NA | NA | NA |
| -0.06 | 0.11  | 0.01  | 0.09  | 0.029 | 0.056   | 0.82     | 7.90E-05 | NA | NA | NA | NA |
| 0.23  | 0.07  | 0     | 0.1   | 0.029 | 0.1     | 0.89     | 7.10E-05 | NA | NA | NA | NA |
| -0.04 | 0.07  | -0.03 | -0.02 | 0.03  | 0.00017 | 0.031    | 0.27     | NA | NA | NA | NA |
| 0.06  | 0.02  | -0.03 | -0.01 | 0.031 | 0.31    | 0.023    | 0.68     | NA | NA | NA | NA |
| 0.06  | 0.03  | -0.07 | -0.06 | 0.031 | 0.19    | 0.023    | 0.067    | NA | NA | NA | NA |
| 0.13  | -0.04 | -0.02 | 0.12  | 0.032 | 0.2     | 0.39     | 1.50E-05 | NA | NA | NA | NA |
| -0.16 | 0.2   | -0.01 | 0.01  | 0.032 | 0.017   | 0.56     | 0.88     | NA | NA | NA | NA |
| -0.09 | -0.04 | -0.04 | -0.01 | 0.032 | 0.42    | 0.037    | 0.74     | NA | NA | NA | NA |
| 0.19  | 0.04  | -0.02 | 0.07  | 0.032 | 0.64    | 0.59     | 0.015    | NA | NA | NA | NA |
| -0.09 | -0.01 | -0.01 | 0.07  | 0.033 | 1       | 0.41     | 0.00023  | NA | NA | NA | NA |
| 0.12  | -0.04 | -0.02 | -0.02 | 0.034 | 0.34    | 0.27     | 0.39     | NA | NA | NA | NA |
| 0.16  | -0.05 | 0.01  | 0.04  | 0.034 | 0.38    | 0.68     | 0.22     | NA | NA | NA | NA |
| 0.06  | 0.07  | -0.02 | 0.03  | 0.036 | 0.0082  | 0.21     | 0.1      | NA | NA | NA | NA |
| 0.07  | 0.08  | -0.05 | -0.03 | 0.036 | 0.00049 | 0.0019   | 0.044    | NA | NA | NA | NA |
| -0.09 | 0.06  | -0.07 | -0.08 | 0.036 | 0.19    | 0.12     | 0.02     | NA | NA | NA | NA |
| -0.08 | -0.09 | -0.04 | -0.01 | 0.038 | 0.00055 | 0.028    | 0.59     | NA | NA | NA | NA |
| 0.14  | 0.03  | -0.07 | 0.11  | 0.039 | 0.93    | 0.079    | 0.043    | NA | NA | NA | NA |

|       |       |       |       |       |          |          |          |    |    |    |    |
|-------|-------|-------|-------|-------|----------|----------|----------|----|----|----|----|
| 0.04  | 0.06  | -0.03 | 0.09  | 0.04  | 0.0013   | 0.038    | 2.60E-07 | NA | NA | NA | NA |
| 0.1   | -0.02 | -0.09 | -0.03 | 0.04  | 0.53     | 5.40E-06 | 0.34     | NA | NA | NA | NA |
| 0.18  | 0.03  | -0.04 | -0.03 | 0.045 | 0.73     | 0.058    | 0.17     | NA | NA | NA | NA |
| 0.14  | 0.06  | 0     | 0.19  | 0.046 | 0.53     | 1        | 0.00012  | NA | NA | NA | NA |
| -0.16 | -0.04 | 0.03  | 0.12  | 0.049 | 0.7      | 0.13     | 0.00044  | NA | NA | NA | NA |
| 0.35  | 0.02  | -0.03 | -0.01 | 0.049 | 1        | 0.77     | 0.97     | NA | NA | NA | NA |
| 0.06  | 0.11  | -0.05 | 0.04  | 0.05  | 0.00019  | 0.001    | 0.0089   | NA | NA | NA | NA |
| 0.17  | 0.04  | 0.03  | 0.11  | 0.05  | 0.5      | 0.1      | 7.50E-06 | NA | NA | NA | NA |
| 0.16  | -0.02 | -0.02 | 0.01  | 0.051 | 0.95     | 0.46     | 0.83     | NA | NA | NA | NA |
| 0.06  | -0.01 | -0.04 | 0.02  | 0.052 | 0.7      | 0.09     | 0.32     | NA | NA | NA | NA |
| 0.06  | 0.06  | 0.02  | 0.02  | 0.054 | 0.027    | 0.38     | 0.36     | NA | NA | NA | NA |
| 0.09  | 0.11  | -0.02 | 0     | 0.054 | 0.0052   | 0.46     | 1        | NA | NA | NA | NA |
| 0.13  | 0.05  | -0.02 | -0.06 | 0.054 | 0.44     | 0.81     | 0.37     | NA | NA | NA | NA |
| -0.13 | -0.13 | 0.03  | 0.03  | 0.054 | 0.014    | 0.22     | 0.23     | NA | NA | NA | NA |
| -0.11 | 0.02  | -0.03 | 0.03  | 0.055 | 0.99     | 0.71     | 0.68     | NA | NA | NA | NA |
| 0.06  | 0.02  | -0.04 | -0.01 | 0.057 | 0.71     | 0.17     | 0.83     | NA | NA | NA | NA |
| -0.05 | 0.01  | -0.07 | -0.05 | 0.057 | 0.83     | 7.00E-04 | 0.0088   | NA | NA | NA | NA |
| 0.28  | 0.03  | -0.07 | -0.01 | 0.059 | 0.78     | 0.035    | 0.85     | NA | NA | NA | NA |
| 0.04  | 0     | -0.06 | 0.05  | 0.06  | 0.92     | 7.30E-08 | 0.0037   | NA | NA | NA | NA |
| 0.05  | 0.1   | -0.05 | -0.05 | 0.06  | 0.00077  | 0.0027   | 0.003    | NA | NA | NA | NA |
| 0.06  | 0.1   | -0.03 | 0.01  | 0.061 | 0.00064  | 0.16     | 0.58     | NA | NA | NA | NA |
| -0.08 | -0.05 | -0.09 | -0.06 | 0.061 | 0.21     | 0.029    | 0.1      | NA | NA | NA | NA |
| -0.08 | -0.03 | -0.05 | 0.02  | 0.061 | 0.62     | 0.002    | 0.21     | NA | NA | NA | NA |
| 0.07  | 0.09  | -0.04 | 0.08  | 0.062 | 0.018    | 0.02     | 0.00036  | NA | NA | NA | NA |
| -0.11 | 0.07  | -0.01 | 0.01  | 0.064 | 0.42     | 0.85     | 0.9      | NA | NA | NA | NA |
| -0.15 | -0.18 | -0.01 | 0.04  | 0.065 | 0.0071   | 0.93     | 0.29     | NA | NA | NA | NA |
| 0.02  | 0.07  | -0.06 | -0.04 | 0.068 | 1.80E-06 | 4.70E-07 | 0.0011   | NA | NA | NA | NA |
| 0.06  | 0.02  | 0     | 0.01  | 0.069 | 0.26     | 0.98     | 0.67     | NA | NA | NA | NA |
| -0.09 | 0.02  | -0.05 | 0.04  | 0.07  | 0.87     | 0.0065   | 0.019    | NA | NA | NA | NA |
| 0.12  | NA    | -0.09 | 0.02  | 0.071 | NA       | 0.056    | 0.81     | NA | NA | NA | NA |

|       |       |       |       |       |          |          |          |    |    |    |    |
|-------|-------|-------|-------|-------|----------|----------|----------|----|----|----|----|
| 0.09  | 0.02  | -0.09 | -0.04 | 0.071 | 0.82     | 0.00072  | 0.28     | NA | NA | NA | NA |
| -0.03 | 0.01  | -0.02 | 0.08  | 0.072 | 0.59     | 0.23     | 1.40E-08 | NA | NA | NA | NA |
| -0.07 | 0.09  | -0.01 | -0.02 | 0.072 | 0.088    | 0.58     | 0.36     | NA | NA | NA | NA |
| 0.11  | -0.04 | -0.01 | 0.14  | 0.072 | 0.53     | 0.63     | 1.80E-05 | NA | NA | NA | NA |
| 0.25  | 0.03  | -0.01 | 0.18  | 0.074 | 0.95     | 0.86     | 5.80E-06 | NA | NA | NA | NA |
| 0.62  | -0.06 | 0.07  | 0.18  | 0.075 | 0.84     | 0.37     | 0.0025   | NA | NA | NA | NA |
| 0.1   | 0.35  | -0.06 | 0     | 0.075 | 4.20E-09 | 0.0014   | 0.86     | NA | NA | NA | NA |
| -0.06 | -0.02 | -0.01 | 0.04  | 0.076 | 0.62     | 0.68     | 0.028    | NA | NA | NA | NA |
| 0.25  | 0.32  | -0.02 | 0.06  | 0.077 | 0.038    | 0.6      | 0.066    | NA | NA | NA | NA |
| 0.04  | 0     | 0.03  | 0.05  | 0.078 | 0.86     | 0.092    | 0.0014   | NA | NA | NA | NA |
| -0.05 | -0.05 | -0.05 | 0.03  | 0.078 | 0.049    | 0.00091  | 0.11     | NA | NA | NA | NA |
| 0.05  | 0.06  | -0.01 | 0.01  | 0.078 | 0.048    | 0.8      | 0.55     | NA | NA | NA | NA |
| 0.09  | 0.07  | -0.04 | -0.03 | 0.079 | 0.15     | 0.19     | 0.33     | NA | NA | NA | NA |
| 0.11  | 0.11  | -0.06 | -0.01 | 0.081 | 0.016    | 0.0033   | 0.62     | NA | NA | NA | NA |
| 0.23  | 0.31  | 0     | 0.22  | 0.081 | 7.80E-05 | 1        | 0.18     | NA | NA | NA | NA |
| 0.13  | -0.07 | -0.03 | 0.05  | 0.082 | 0.22     | 0.14     | 0.022    | NA | NA | NA | NA |
| -0.15 | -0.17 | -0.04 | 0     | 0.084 | 0.2      | 0.21     | 1        | NA | NA | NA | NA |
| 0.09  | 0.17  | -0.01 | -0.02 | 0.084 | 0.006    | 0.81     | 0.54     | NA | NA | NA | NA |
| -0.03 | -0.02 | -0.03 | 0.04  | 0.085 | 0.38     | 0.027    | 0.011    | NA | NA | NA | NA |
| -0.13 | NA    | -0.23 | -0.07 | 0.085 | NA       | 1.00E-06 | 0.27     | NA | NA | NA | NA |
| -0.03 | -0.01 | -0.03 | 0.03  | 0.086 | 0.68     | 0.062    | 0.07     | NA | NA | NA | NA |
| -0.08 | -0.06 | -0.05 | 0     | 0.086 | 0.19     | 0.12     | 0.97     | NA | NA | NA | NA |
| 0.04  | -0.02 | -0.05 | 0.02  | 0.088 | 0.19     | 0.00021  | 0.28     | NA | NA | NA | NA |
| -0.45 | -0.53 | 0.14  | 0.66  | 0.089 | 0.011    | 0.47     | 0.0069   | NA | NA | NA | NA |
| 0.09  | 0.04  | -0.05 | 0.02  | 0.09  | 0.27     | 0.00041  | 0.33     | NA | NA | NA | NA |
| -0.03 | 0.05  | -0.04 | -0.01 | 0.094 | 0.046    | 0.041    | 0.8      | NA | NA | NA | NA |
| 0.05  | 0.02  | -0.01 | -0.01 | 0.095 | 0.45     | 0.73     | 0.48     | NA | NA | NA | NA |
| 0.08  | 0.02  | 0.02  | 0.03  | 0.097 | 0.8      | 0.32     | 0.12     | NA | NA | NA | NA |
| -0.06 | 0.02  | -0.02 | 0.02  | 0.097 | 0.77     | 0.22     | 0.18     | NA | NA | NA | NA |
| 0.07  | 0.08  | -0.01 | -0.04 | 0.097 | 0.084    | 0.79     | 0.099    | NA | NA | NA | NA |

|       |       |       |       |       |          |          |          |    |    |    |    |
|-------|-------|-------|-------|-------|----------|----------|----------|----|----|----|----|
| 0.32  | -0.03 | 0.02  | 0.12  | 0.098 | 0.71     | 0.5      | 0.0072   | NA | NA | NA | NA |
| 0.09  | 0.11  | 0     | 0.09  | 0.1   | 0.018    | 0.96     | 0.00074  | NA | NA | NA | NA |
| -0.07 | -0.05 | -0.01 | 0.1   | 0.1   | 0.11     | 0.5      | 1.70E-08 | NA | NA | NA | NA |
| 0.06  | -0.01 | -0.02 | 0.03  | 0.1   | 0.99     | 0.23     | 0.088    | NA | NA | NA | NA |
| 0.04  | -0.05 | -0.02 | 0.02  | 0.1   | 0.0026   | 0.068    | 0.11     | NA | NA | NA | NA |
| -0.06 | 0     | -0.07 | -0.01 | 0.1   | 0.98     | 1.00E-06 | 0.83     | NA | NA | NA | NA |
| -0.18 | 0.03  | 0.02  | 0.1   | 0.1   | 1        | 0.47     | 2.00E-04 | NA | NA | NA | NA |
| -0.3  | -0.31 | -0.06 | 0.12  | 0.1   | 0.0036   | 0.11     | 0.036    | NA | NA | NA | NA |
| -0.04 | 0.1   | 0.02  | 0.05  | 0.1   | 0.0091   | 0.47     | 0.051    | NA | NA | NA | NA |
| 0.13  | 0.26  | 0.05  | 0.04  | 0.11  | 0.0098   | 0.43     | 0.4      | NA | NA | NA | NA |
| -0.18 | -0.22 | -0.13 | 0.11  | 0.11  | 0.06     | 0.2      | 0.29     | NA | NA | NA | NA |
| 0.03  | 0.02  | -0.04 | -0.03 | 0.11  | 0.44     | 0.005    | 0.05     | NA | NA | NA | NA |
| 0.08  | 0.14  | -0.07 | -0.03 | 0.12  | 0.0096   | 0.003    | 0.26     | NA | NA | NA | NA |
| -0.04 | 0     | -0.03 | -0.02 | 0.12  | 0.97     | 0.15     | 0.3      | NA | NA | NA | NA |
| 0.05  | 0     | -0.02 | 0.06  | 0.12  | 0.93     | 0.14     | 0.001    | NA | NA | NA | NA |
| 0.08  | 0.12  | -0.03 | 0.05  | 0.12  | 0.0071   | 0.39     | 0.063    | NA | NA | NA | NA |
| -0.09 | -0.03 | 0.02  | 0.05  | 0.12  | 0.49     | 0.6      | 0.1      | NA | NA | NA | NA |
| 0.05  | -0.03 | 0.03  | 0     | 0.12  | 0.14     | 0.17     | 0.98     | NA | NA | NA | NA |
| 0.07  | 0.03  | 0     | 0.04  | 0.12  | 0.43     | 1        | 0.14     | NA | NA | NA | NA |
| -0.04 | -0.04 | -0.02 | -0.07 | 0.12  | 0.14     | 0.41     | 0.00071  | NA | NA | NA | NA |
| -0.06 | -0.05 | -0.06 | 0.04  | 0.12  | 0.1      | 0.067    | 0.27     | NA | NA | NA | NA |
| -0.09 | -0.06 | -0.01 | 0.05  | 0.12  | 0.18     | 0.53     | 0.035    | NA | NA | NA | NA |
| 0.19  | 0.31  | -0.09 | 0.25  | 0.13  | 7.00E-05 | 0.04     | 1.50E-06 | NA | NA | NA | NA |
| 0.02  | 0.02  | -0.02 | 0.05  | 0.13  | 0.034    | 0.0072   | 1.70E-08 | NA | NA | NA | NA |
| 0.05  | 0.03  | -0.07 | -0.03 | 0.13  | 0.098    | 1.40E-05 | 0.064    | NA | NA | NA | NA |
| -0.05 | 0.03  | -0.14 | -0.14 | 0.13  | 0.39     | 5.50E-06 | 2.90E-06 | NA | NA | NA | NA |
| -0.02 | -0.03 | -0.06 | 0     | 0.13  | 0.1      | 0.00026  | 0.92     | NA | NA | NA | NA |
| -0.58 | -0.52 | -0.04 | 0.26  | 0.13  | 0.16     | 0.31     | 0.0019   | NA | NA | NA | NA |
| -0.03 | 0     | -0.04 | 0.02  | 0.13  | 0.98     | 0.00063  | 0.23     | NA | NA | NA | NA |
| -0.05 | -0.05 | -0.01 | -0.01 | 0.13  | 0.084    | 0.66     | 0.59     | NA | NA | NA | NA |

|       |       |       |       |      |        |         |          |    |    |    |    |
|-------|-------|-------|-------|------|--------|---------|----------|----|----|----|----|
| -0.06 | -0.01 | -0.02 | 0.05  | 0.14 | 0.66   | 0.44    | 0.00042  | NA | NA | NA | NA |
| -0.07 | 0.12  | 0     | 0.04  | 0.14 | 0.025  | 1       | 0.02     | NA | NA | NA | NA |
| 0.16  | 0.13  | 0.05  | 0.01  | 0.14 | 0.0053 | 0.24    | 0.97     | NA | NA | NA | NA |
| 0.1   | -0.05 | -0.01 | -0.01 | 0.14 | 0.47   | 0.69    | 0.88     | NA | NA | NA | NA |
| -0.03 | 0     | -0.04 | -0.01 | 0.14 | 0.94   | 0.045   | 0.68     | NA | NA | NA | NA |
| -0.11 | -0.08 | -0.04 | 0.03  | 0.14 | 0.18   | 0.048   | 0.24     | NA | NA | NA | NA |
| 0.04  | 0.02  | 0.02  | 0.05  | 0.14 | 0.21   | 0.44    | 0.0043   | NA | NA | NA | NA |
| 0.04  | -0.03 | 0.01  | 0.03  | 0.14 | 0.21   | 0.59    | 0.12     | NA | NA | NA | NA |
| -0.04 | -0.02 | -0.08 | -0.02 | 0.14 | 0.73   | 0.002   | 0.48     | NA | NA | NA | NA |
| 0.62  | 0.51  | -0.02 | 0.26  | 0.14 | 0.002  | 0.67    | 0.21     | NA | NA | NA | NA |
| 0.41  | 0.17  | -0.07 | 0.12  | 0.14 | 0.37   | 0.32    | 0.46     | NA | NA | NA | NA |
| 0.03  | 0.05  | -0.04 | 0.03  | 0.15 | 0.073  | 0.024   | 0.17     | NA | NA | NA | NA |
| -0.1  | 0.11  | -0.03 | 0.14  | 0.15 | 0.47   | 0.47    | 0.0014   | NA | NA | NA | NA |
| -0.05 | -0.01 | -0.02 | -0.03 | 0.15 | 0.86   | 0.23    | 0.065    | NA | NA | NA | NA |
| 0.1   | 0.02  | 0     | 0.08  | 0.15 | 0.89   | 1       | 0.95     | NA | NA | NA | NA |
| 0.12  | 0.07  | -0.08 | -0.01 | 0.15 | 0.35   | 0.0042  | 0.87     | NA | NA | NA | NA |
| 0.08  | -0.03 | 0.05  | 0.11  | 0.15 | 0.64   | 0.21    | 0.015    | NA | NA | NA | NA |
| 0.04  | 0.03  | -0.03 | 0.01  | 0.15 | 0.069  | 0.0035  | 0.6      | NA | NA | NA | NA |
| 0.06  | 0.04  | 0.09  | 0.1   | 0.15 | 0.37   | 0.00011 | 0.00011  | NA | NA | NA | NA |
| -0.23 | 0.02  | 0.03  | 0.08  | 0.16 | 1      | 0.52    | 0.034    | NA | NA | NA | NA |
| -0.36 | -0.02 | -0.01 | -0.06 | 0.16 | 1      | 0.79    | 0.37     | NA | NA | NA | NA |
| -0.06 | -0.01 | -0.06 | 0.05  | 0.16 | 0.89   | 0.0067  | 0.017    | NA | NA | NA | NA |
| 0.06  | -0.01 | 0.01  | 0.04  | 0.17 | 0.9    | 0.79    | 0.023    | NA | NA | NA | NA |
| -0.1  | -0.13 | -0.07 | -0.06 | 0.17 | 0.088  | 0.00025 | 0.015    | NA | NA | NA | NA |
| 0.1   | 0.1   | -0.06 | 0.06  | 0.17 | 0.05   | 0.0027  | 0.058    | NA | NA | NA | NA |
| -0.03 | 0.03  | 0     | 0.03  | 0.18 | 0.25   | 1       | 0.061    | NA | NA | NA | NA |
| -0.1  | -0.06 | -0.08 | -0.12 | 0.18 | 0.44   | 0.022   | 0.00063  | NA | NA | NA | NA |
| -0.09 | -0.13 | -0.05 | -0.03 | 0.18 | 0.012  | 0.025   | 0.28     | NA | NA | NA | NA |
| -0.03 | -0.03 | -0.04 | 0     | 0.18 | 0.32   | 0.035   | 0.93     | NA | NA | NA | NA |
| 0.19  | -0.01 | -0.01 | 0.14  | 0.18 | 1      | 0.85    | 3.80E-05 | NA | NA | NA | NA |



|       |       |       |       |      |         |          |          |    |    |    |    |
|-------|-------|-------|-------|------|---------|----------|----------|----|----|----|----|
| -0.12 | -0.07 | -0.01 | 0.06  | 0.18 | 0.44    | 0.94     | 0.16     | NA | NA | NA | NA |
| -0.04 | -0.06 | -0.09 | -0.07 | 0.18 | 0.017   | 6.90E-06 | 0.0029   | NA | NA | NA | NA |
| -0.03 | -0.02 | -0.02 | 0.02  | 0.18 | 0.48    | 0.079    | 0.21     | NA | NA | NA | NA |
| 0.05  | 0.03  | -0.01 | 0.03  | 0.18 | 0.41    | 0.72     | 0.089    | NA | NA | NA | NA |
| -0.05 | -0.08 | 0.03  | 0.05  | 0.18 | 0.0037  | 0.16     | 0.057    | NA | NA | NA | NA |
| -0.04 | 0.15  | -0.03 | -0.02 | 0.19 | 0.011   | 0.23     | 0.73     | NA | NA | NA | NA |
| -0.08 | -0.08 | 0.02  | 0.01  | 0.19 | 0.13    | 0.61     | 0.8      | NA | NA | NA | NA |
| 0.08  | 0.02  | -0.06 | -0.06 | 0.19 | 1       | 0.0079   | 0.029    | NA | NA | NA | NA |
| -0.05 | -0.01 | -0.02 | 0.03  | 0.19 | 0.98    | 0.53     | 0.19     | NA | NA | NA | NA |
| -0.93 | NA    | -0.01 | -0.01 | 0.19 | NA      | 0.97     | 1        | NA | NA | NA | NA |
| 0.25  | -0.02 | 0.02  | 0     | 0.19 | 0.94    | 0.52     | 1        | NA | NA | NA | NA |
| -0.04 | -0.02 | -0.07 | -0.01 | 0.19 | 0.65    | 7.70E-05 | 0.79     | NA | NA | NA | NA |
| 0.15  | 0.4   | -0.13 | -0.06 | 0.19 | 0.00052 | 0.007    | 0.15     | NA | NA | NA | NA |
| -0.03 | 0.03  | -0.04 | 0.05  | 0.19 | 0.35    | 0.0022   | 0.0046   | NA | NA | NA | NA |
| -0.06 | -0.07 | -0.06 | 0.02  | 0.2  | 0.17    | 0.013    | 0.6      | NA | NA | NA | NA |
| 0.04  | 0     | -0.01 | 0.09  | 0.2  | 0.92    | 0.68     | 2.50E-05 | NA | NA | NA | NA |
| 0.03  | 0.01  | 0     | 0.03  | 0.2  | 0.44    | 1        | 0.02     | NA | NA | NA | NA |
| 0.06  | 0.08  | -0.02 | 0.01  | 0.2  | 0.042   | 0.3      | 0.53     | NA | NA | NA | NA |
| -0.07 | 0     | -0.01 | 0.06  | 0.2  | 1       | 0.78     | 0.25     | NA | NA | NA | NA |
| -0.06 | -0.03 | -0.03 | 0.05  | 0.2  | 0.5     | 0.26     | 0.13     | NA | NA | NA | NA |
| 0.06  | 0.01  | -0.05 | 0.03  | 0.21 | 0.99    | 0.027    | 0.3      | NA | NA | NA | NA |
| 0.9   | NA    | -0.08 | 0.17  | 0.21 | NA      | 0.2      | 0.0017   | NA | NA | NA | NA |
| 0.06  | 0.03  | 0.01  | 0.05  | 0.21 | 0.44    | 0.39     | 0.0049   | NA | NA | NA | NA |
| 0.09  | 0.05  | -0.02 | 0.03  | 0.21 | 0.76    | 0.79     | 0.67     | NA | NA | NA | NA |
| -0.1  | -0.14 | -0.05 | 0.03  | 0.21 | 0.068   | 0.057    | 0.38     | NA | NA | NA | NA |
| -0.03 | -0.04 | -0.01 | 0.01  | 0.21 | 0.015   | 0.6      | 0.46     | NA | NA | NA | NA |
| -0.04 | 0.02  | 0.11  | -0.14 | 0.21 | 0.92    | 1        | 0.56     | NA | NA | NA | NA |
| -0.17 | -0.12 | -0.09 | -0.05 | 0.21 | 0.5     | 0.19     | 0.73     | NA | NA | NA | NA |
| 0.02  | 0.02  | -0.01 | 0.03  | 0.21 | 0.26    | 0.73     | 0.02     | NA | NA | NA | NA |
| 0.06  | -0.04 | -0.09 | -0.01 | 0.21 | 0.18    | 3.00E-08 | 0.7      | NA | NA | NA | NA |

|       |       |       |       |      |          |          |          |    |    |    |    |
|-------|-------|-------|-------|------|----------|----------|----------|----|----|----|----|
| 0.05  | -0.03 | -0.04 | 0.02  | 0.21 | 0.34     | 0.017    | 0.36     | NA | NA | NA | NA |
| 0.04  | 0.05  | -0.02 | 0.02  | 0.21 | 0.083    | 0.18     | 0.33     | NA | NA | NA | NA |
| 0.04  | 0     | -0.02 | -0.01 | 0.21 | 1        | 0.11     | 0.33     | NA | NA | NA | NA |
| 0.9   | -0.02 | -0.05 | 0.17  | 0.22 | 0.94     | 0.79     | 0.16     | NA | NA | NA | NA |
| -0.04 | -0.01 | -0.05 | 0.06  | 0.22 | 0.85     | 0.0056   | 0.0046   | NA | NA | NA | NA |
| 0.17  | 0.03  | -0.1  | -0.09 | 0.22 | 1        | 0.0082   | 0.019    | NA | NA | NA | NA |
| -0.07 | -0.02 | -0.05 | -0.04 | 0.22 | 0.86     | 0.28     | 0.4      | NA | NA | NA | NA |
| 0.05  | 0.22  | -0.02 | 0.13  | 0.22 | 1.90E-05 | 0.41     | 3.70E-06 | NA | NA | NA | NA |
| 0.06  | -0.11 | -0.04 | 0.03  | 0.22 | 0.0051   | 0.019    | 0.18     | NA | NA | NA | NA |
| -0.15 | -0.01 | -0.08 | 0.19  | 0.22 | 1        | 0.09     | 0.0039   | NA | NA | NA | NA |
| -0.02 | -0.01 | -0.02 | 0.03  | 0.22 | 0.83     | 0.21     | 0.036    | NA | NA | NA | NA |
| 0.03  | 0.04  | 0     | 0.03  | 0.22 | 0.089    | 1        | 0.2      | NA | NA | NA | NA |
| -0.04 | 0.05  | -0.01 | 0.03  | 0.23 | 0.17     | 0.79     | 0.16     | NA | NA | NA | NA |
| -0.13 | -0.09 | 0.05  | 0.12  | 0.23 | 0.3      | 0.072    | 5.00E-05 | NA | NA | NA | NA |
| -0.05 | 0.03  | -0.05 | 0     | 0.23 | 0.59     | 0.014    | 0.89     | NA | NA | NA | NA |
| 0.31  | -0.11 | -0.13 | -0.06 | 0.23 | 0.17     | 3.20E-09 | 0.047    | NA | NA | NA | NA |
| 0.07  | 0.26  | -0.04 | 0.03  | 0.23 | 1.20E-06 | 0.19     | 0.4      | NA | NA | NA | NA |
| -0.02 | -0.01 | -0.05 | -0.02 | 0.23 | 0.35     | 8.10E-05 | 0.1      | NA | NA | NA | NA |
| -0.09 | 0.06  | 0.02  | 0.08  | 0.24 | 0.59     | 0.6      | 0.0043   | NA | NA | NA | NA |
| 0.11  | 0     | -0.03 | -0.06 | 0.24 | 1        | 0.17     | 0.004    | NA | NA | NA | NA |
| 0.07  | 0.01  | -0.07 | -0.03 | 0.24 | 0.96     | 0.051    | 0.38     | NA | NA | NA | NA |
| -0.05 | 0.02  | -0.09 | -0.03 | 0.24 | 0.61     | 0.00099  | 0.39     | NA | NA | NA | NA |
| -0.07 | 0.08  | -0.09 | -0.04 | 0.24 | 0.18     | 6.80E-06 | 0.084    | NA | NA | NA | NA |
| 0.33  | 0.86  | 0     | 0.14  | 0.24 | 0.011    | 1        | 0.023    | NA | NA | NA | NA |
| 0.11  | 0.04  | 0     | 0.05  | 0.25 | 0.77     | 1        | 0.22     | NA | NA | NA | NA |
| 0.07  | 0.05  | -0.01 | 0.02  | 0.25 | 0.29     | 0.74     | 0.59     | NA | NA | NA | NA |
| -0.13 | 0     | -0.07 | 0.24  | 0.25 | 1        | 0.38     | 0.002    | NA | NA | NA | NA |
| 0.1   | 0.06  | 0     | 0.07  | 0.25 | 0.57     | 1        | 0.046    | NA | NA | NA | NA |
| 0.1   | -0.14 | -0.06 | -0.04 | 0.25 | 0.015    | 0.026    | 0.2      | NA | NA | NA | NA |
| -0.19 | -0.19 | -0.07 | 0.04  | 0.25 | 0.22     | 0.035    | 0.27     | NA | NA | NA | NA |

|       |       |       |       |      |          |          |          |    |    |    |    |
|-------|-------|-------|-------|------|----------|----------|----------|----|----|----|----|
| 0.06  | 0.01  | -0.01 | 0.06  | 0.25 | 0.91     | 0.7      | 0.021    | NA | NA | NA | NA |
| -0.12 | 0.05  | 0.02  | 0.07  | 0.26 | 0.64     | 0.64     | 0.043    | NA | NA | NA | NA |
| -0.05 | -0.03 | -0.01 | 0     | 0.26 | 0.31     | 0.76     | 0.98     | NA | NA | NA | NA |
| -0.21 | NA    | 0.1   | 0.21  | 0.26 | NA       | 0.087    | 4.00E-04 | NA | NA | NA | NA |
| -0.03 | 0.04  | -0.1  | -0.06 | 0.26 | 0.21     | 0.00059  | 0.13     | NA | NA | NA | NA |
| -0.03 | -0.02 | -0.02 | 0     | 0.26 | 0.4      | 0.27     | 0.92     | NA | NA | NA | NA |
| -0.03 | -0.03 | -0.03 | 0.01  | 0.26 | 0.096    | 0.23     | 0.88     | NA | NA | NA | NA |
| -0.06 | 0.01  | -0.05 | -0.03 | 0.26 | 0.86     | 0.031    | 0.28     | NA | NA | NA | NA |
| -0.03 | 0.03  | -0.04 | 0.01  | 0.26 | 0.52     | 0.12     | 0.74     | NA | NA | NA | NA |
| 0.03  | 0.02  | -0.06 | 0.01  | 0.27 | 0.49     | 8.50E-05 | 0.71     | NA | NA | NA | NA |
| 0.07  | 0.19  | -0.05 | 0.02  | 0.27 | 6.00E-04 | 0.17     | 0.58     | NA | NA | NA | NA |
| -0.02 | 0.06  | -0.04 | -0.02 | 0.27 | 0.00047  | 0.00013  | 0.17     | NA | NA | NA | NA |
| 0.04  | -0.06 | -0.06 | 0.01  | 0.27 | 0.0056   | 6.60E-05 | 0.54     | NA | NA | NA | NA |
| 0.07  | 0.01  | 0     | 0.04  | 0.28 | 1        | 1        | 0.097    | NA | NA | NA | NA |
| -0.12 | -0.21 | -0.05 | -0.05 | 0.28 | 0.012    | 0.059    | 0.028    | NA | NA | NA | NA |
| -0.05 | -0.02 | -0.08 | -0.05 | 0.28 | 0.85     | 0.002    | 0.18     | NA | NA | NA | NA |
| 0.16  | 0.09  | 0     | 0.13  | 0.28 | 0.56     | 1        | 0.001    | NA | NA | NA | NA |
| -0.03 | 0.03  | -0.04 | -0.04 | 0.28 | 0.31     | 0.018    | 0.0058   | NA | NA | NA | NA |
| 0.89  | -0.06 | -0.21 | -0.22 | 0.28 | 0.67     | 0.032    | 0.0093   | NA | NA | NA | NA |
| -0.09 | 0     | -0.09 | 0.04  | 0.28 | 1        | 0.0019   | 0.33     | NA | NA | NA | NA |
| 0.05  | 0     | -0.12 | -0.07 | 0.28 | 1        | 2.20E-07 | 0.011    | NA | NA | NA | NA |
| 0.06  | 0.03  | -0.01 | 0.01  | 0.28 | 0.51     | 0.56     | 0.59     | NA | NA | NA | NA |
| -0.02 | -0.01 | -0.05 | 0     | 0.28 | 0.55     | 0.0013   | 1        | NA | NA | NA | NA |
| -0.06 | 0     | -0.03 | 0.01  | 0.28 | 1        | 0.068    | 0.83     | NA | NA | NA | NA |
| -0.05 | -0.06 | -0.07 | -0.04 | 0.29 | 0.18     | 0.00074  | 0.11     | NA | NA | NA | NA |
| 0.08  | 0.35  | 0.2   | 0.15  | 0.29 | 0.25     | 4.80E-06 | 0.00074  | NA | NA | NA | NA |
| -0.06 | -0.05 | 0.28  | 0.28  | 0.29 | 0.44     | 1.40E-08 | 4.00E-07 | NA | NA | NA | NA |
| -0.08 | 0.01  | -0.04 | 0.01  | 0.29 | 0.97     | 0.13     | 0.75     | NA | NA | NA | NA |
| -0.03 | 0.21  | -0.02 | -0.08 | 0.29 | 1.20E-05 | 0.52     | 1.40E-05 | NA | NA | NA | NA |
| 0.04  | 0.13  | 0.02  | 0.06  | 0.29 | 0.0016   | 0.38     | 0.0025   | NA | NA | NA | NA |

|       |       |       |       |      |          |          |          |    |    |    |    |
|-------|-------|-------|-------|------|----------|----------|----------|----|----|----|----|
| -0.03 | 0.01  | -0.08 | -0.01 | 0.3  | 0.9      | 0.00023  | 0.79     | NA | NA | NA | NA |
| 0.02  | 0.03  | -0.02 | 0.04  | 0.3  | 0.015    | 0.13     | 0.01     | NA | NA | NA | NA |
| -0.14 | 0.06  | 0     | -0.01 | 0.3  | 0.84     | 1        | 0.75     | NA | NA | NA | NA |
| 0.05  | 0.02  | -0.01 | 0.04  | 0.31 | 0.91     | 0.57     | 0.057    | NA | NA | NA | NA |
| 0.08  | 0.19  | -0.1  | -0.04 | 0.31 | 0.02     | 5.60E-07 | 0.11     | NA | NA | NA | NA |
| 0.06  | 0.05  | -0.05 | -0.03 | 0.31 | 0.15     | 0.027    | 0.25     | NA | NA | NA | NA |
| 0.03  | 0.08  | -0.06 | 0     | 0.31 | 0.008    | 2.90E-05 | 0.88     | NA | NA | NA | NA |
| 0.15  | NA    | -0.05 | -0.05 | 0.31 | NA       | 0.095    | 0.06     | NA | NA | NA | NA |
| -0.02 | 0.02  | -0.05 | 0.03  | 0.31 | 0.37     | 0.0066   | 0.22     | NA | NA | NA | NA |
| -0.04 | 0.04  | -0.02 | -0.01 | 0.31 | 0.54     | 0.33     | 0.7      | NA | NA | NA | NA |
| -0.02 | 0.09  | -0.03 | 0.01  | 0.31 | 7.40E-05 | 0.023    | 0.58     | NA | NA | NA | NA |
| 0.03  | 0.02  | 0.05  | 0.06  | 0.31 | 0.52     | 0.1      | 0.0017   | NA | NA | NA | NA |
| 0.12  | 0.12  | -0.12 | 0     | 0.32 | 0.72     | 0.019    | 1        | NA | NA | NA | NA |
| 0.06  | 0.12  | 0     | 0.01  | 0.32 | 0.0064   | 0.96     | 0.5      | NA | NA | NA | NA |
| 0.08  | 0.07  | -0.03 | 0     | 0.32 | 0.42     | 0.45     | 1        | NA | NA | NA | NA |
| 0.01  | 0.03  | -0.02 | 0.02  | 0.32 | 0.096    | 0.41     | 0.23     | NA | NA | NA | NA |
| -0.04 | -0.06 | -0.08 | 0.01  | 0.32 | 0.063    | 0.0035   | 0.76     | NA | NA | NA | NA |
| -0.05 | 0     | 0     | 0.01  | 0.32 | 1        | 1        | 0.52     | NA | NA | NA | NA |
| 0.5   | NA    | NA    | NA    | 0.32 | NA       | NA       | NA       | NA | NA | NA | NA |
| -0.03 | 0     | -0.04 | 0.04  | 0.32 | 1        | 0.0093   | 0.043    | NA | NA | NA | NA |
| -0.02 | -0.01 | 0.03  | 0.06  | 0.33 | 0.81     | 0.19     | 0.0037   | NA | NA | NA | NA |
| 0.1   | -0.04 | -0.05 | 0.1   | 0.33 | 0.67     | 0.2      | 0.013    | NA | NA | NA | NA |
| 0.22  | 0.23  | -0.09 | 0.06  | 0.34 | 0.27     | 0.021    | 0.31     | NA | NA | NA | NA |
| -0.04 | -0.01 | 0.02  | 0.06  | 0.34 | 0.89     | 0.11     | 0.00011  | NA | NA | NA | NA |
| 0.03  | 0.04  | 0.02  | -0.01 | 0.34 | 0.057    | 0.81     | 0.95     | NA | NA | NA | NA |
| 0.05  | 0.07  | -0.05 | -0.01 | 0.34 | 0.22     | 0.021    | 0.71     | NA | NA | NA | NA |
| -0.03 | 0.05  | -0.02 | 0.02  | 0.34 | 0.11     | 0.23     | 0.22     | NA | NA | NA | NA |
| 0.03  | 0.01  | -0.01 | 0.08  | 0.34 | 0.72     | 0.31     | 2.20E-06 | NA | NA | NA | NA |
| -0.05 | 0.06  | -0.05 | 0.04  | 0.34 | 0.22     | 0.014    | 0.18     | NA | NA | NA | NA |
| 0.03  | 0.07  | -0.02 | 0.03  | 0.35 | 0.014    | 0.15     | 0.097    | NA | NA | NA | NA |

|       |       |       |       |      |         |          |          |    |    |    |    |
|-------|-------|-------|-------|------|---------|----------|----------|----|----|----|----|
| -0.05 | -0.08 | 0.01  | 0.06  | 0.35 | 0.0038  | 0.8      | 0.0023   | NA | NA | NA | NA |
| 0.03  | 0     | -0.02 | 0.03  | 0.35 | 1       | 0.41     | 0.095    | NA | NA | NA | NA |
| 0.08  | -0.09 | -0.08 | 0.05  | 0.35 | 0.031   | 0.0049   | 0.053    | NA | NA | NA | NA |
| 0.01  | -0.01 | -0.01 | 0.02  | 0.35 | 0.67    | 0.34     | 0.075    | NA | NA | NA | NA |
| 0.27  | 0.19  | -0.02 | 0.02  | 0.36 | 1       | 0.38     | 0.44     | NA | NA | NA | NA |
| -0.01 | 0     | -0.01 | 0.05  | 0.36 | 1       | 0.61     | 3.00E-05 | NA | NA | NA | NA |
| -0.05 | -0.06 | -0.01 | 0.02  | 0.36 | 0.094   | 0.71     | 0.52     | NA | NA | NA | NA |
| 0.06  | 0.09  | 0.02  | 0     | 0.36 | 0.072   | 0.51     | 1        | NA | NA | NA | NA |
| -0.14 | 0.1   | -0.04 | 0.02  | 0.36 | 0.66    | 0.064    | 0.57     | NA | NA | NA | NA |
| 0.03  | -0.01 | -0.04 | 0     | 0.36 | 0.58    | 0.0016   | 0.85     | NA | NA | NA | NA |
| 0.02  | 0     | -0.03 | 0.01  | 0.36 | 1       | 0.05     | 0.6      | NA | NA | NA | NA |
| 0.04  | 0.03  | -0.01 | -0.02 | 0.36 | 0.16    | 0.29     | 0.19     | NA | NA | NA | NA |
| 0.11  | 0.1   | -0.02 | 0.03  | 0.36 | 0.39    | 0.67     | 0.64     | NA | NA | NA | NA |
| -0.85 | -0.8  | 0.04  | 0.08  | 0.36 | 0.46    | 0.2      | 0.026    | NA | NA | NA | NA |
| -0.07 | -0.13 | 0.01  | 0.01  | 0.37 | 0.00015 | 0.65     | 0.45     | NA | NA | NA | NA |
| -0.03 | 0.01  | -0.04 | 0.02  | 0.37 | 0.88    | 0.016    | 0.31     | NA | NA | NA | NA |
| -0.05 | -0.03 | -0.01 | 0.05  | 0.37 | 0.7     | 0.65     | 0.01     | NA | NA | NA | NA |
| -0.28 | -0.57 | -0.03 | -0.03 | 0.37 | 0.014   | 0.78     | 0.73     | NA | NA | NA | NA |
| -0.06 | -0.08 | -0.05 | 0.01  | 0.37 | 0.052   | 0.0043   | 0.51     | NA | NA | NA | NA |
| 0.05  | -0.02 | -0.04 | -0.01 | 0.38 | 0.44    | 0.069    | 0.7      | NA | NA | NA | NA |
| 0.02  | 0.08  | 0.01  | 0.03  | 0.38 | 0.0081  | 0.79     | 0.043    | NA | NA | NA | NA |
| -0.1  | -0.43 | -0.2  | 0.23  | 0.38 | 0.002   | 0.056    | 1        | NA | NA | NA | NA |
| 0.04  | -0.05 | -0.01 | 0.01  | 0.38 | 0.093   | 0.51     | 0.51     | NA | NA | NA | NA |
| -0.02 | -0.04 | -0.02 | 0.02  | 0.39 | 0.11    | 0.16     | 0.08     | NA | NA | NA | NA |
| 0.05  | 0.01  | -0.04 | -0.01 | 0.39 | 0.83    | 0.03     | 0.43     | NA | NA | NA | NA |
| 0.02  | -0.01 | -0.06 | 0     | 0.39 | 0.52    | 1.30E-05 | 0.92     | NA | NA | NA | NA |
| 0.03  | 0.02  | -0.02 | 0.03  | 0.39 | 0.67    | 0.51     | 0.15     | NA | NA | NA | NA |
| 0.04  | 0.03  | 0.02  | 0.06  | 0.39 | 0.81    | 0.81     | 0.2      | NA | NA | NA | NA |
| 0.05  | -0.06 | -0.01 | 0.07  | 0.39 | 0.21    | 0.66     | 0.0045   | NA | NA | NA | NA |
| 0.03  | 0.05  | -0.11 | -0.08 | 0.39 | 0.12    | 8.70E-08 | 1.70E-05 | NA | NA | NA | NA |

|       |       |       |       |      |          |          |          |    |    |    |    |
|-------|-------|-------|-------|------|----------|----------|----------|----|----|----|----|
| 0.15  | 0     | -0.02 | -0.01 | 0.4  | 1        | 0.74     | 0.93     | NA | NA | NA | NA |
| 0.03  | 0.01  | -0.04 | -0.01 | 0.4  | 0.57     | 0.0053   | 0.72     | NA | NA | NA | NA |
| 0.43  | 0.09  | -0.07 | -0.1  | 0.4  | 1        | 0.14     | 0.028    | NA | NA | NA | NA |
| -0.04 | 0.02  | -0.02 | 0     | 0.4  | 0.54     | 0.44     | 1        | NA | NA | NA | NA |
| 0.05  | -0.01 | -0.08 | 0.03  | 0.4  | 0.83     | 5.00E-05 | 0.33     | NA | NA | NA | NA |
| 0.04  | 0.15  | -0.08 | -0.02 | 0.41 | 0.0019   | 0.0011   | 0.49     | NA | NA | NA | NA |
| 0.36  | 0.02  | -0.05 | -0.05 | 0.41 | 1        | 0.17     | 0.33     | NA | NA | NA | NA |
| -0.06 | 0.06  | 0.04  | 0.07  | 0.41 | 0.66     | 0.29     | 0.05     | NA | NA | NA | NA |
| -0.03 | 0.02  | -0.02 | 0     | 0.41 | 0.36     | 0.08     | 0.87     | NA | NA | NA | NA |
| -0.03 | -0.01 | -0.03 | 0.01  | 0.41 | 0.7      | 0.013    | 0.52     | NA | NA | NA | NA |
| 0.01  | 0.03  | -0.01 | 0.06  | 0.42 | 0.15     | 0.69     | 9.80E-06 | NA | NA | NA | NA |
| -0.13 | NA    | 0     | -0.04 | 0.42 | NA       | 1        | 0.73     | NA | NA | NA | NA |
| 0.08  | NA    | -0.09 | -0.02 | 0.42 | NA       | 3.70E-05 | 0.58     | NA | NA | NA | NA |
| -0.21 | -0.15 | 0.11  | 0.14  | 0.42 | 0.94     | 0.16     | 0.1      | NA | NA | NA | NA |
| 0.05  | 0.04  | -0.08 | 0.05  | 0.42 | 0.34     | 1.60E-05 | 0.025    | NA | NA | NA | NA |
| -0.02 | 0.03  | -0.02 | 0.04  | 0.42 | 0.18     | 0.11     | 0.0081   | NA | NA | NA | NA |
| -0.03 | 0.08  | -0.08 | -0.01 | 0.42 | 0.016    | 0.0053   | 0.59     | NA | NA | NA | NA |
| 0.04  | 0.01  | -0.01 | 0.11  | 0.42 | 0.93     | 0.82     | 1.50E-06 | NA | NA | NA | NA |
| -0.17 | 0.05  | -0.08 | 0.03  | 0.42 | 0.64     | 0.004    | 0.56     | NA | NA | NA | NA |
| 0.04  | 0.06  | -0.01 | 0.01  | 0.43 | 0.1      | 0.68     | 0.82     | NA | NA | NA | NA |
| 0.07  | 0.11  | -0.13 | -0.1  | 0.43 | 0.11     | 9.30E-05 | 0.39     | NA | NA | NA | NA |
| 0.06  | -0.01 | -0.1  | -0.06 | 0.43 | 1        | 0.028    | 0.25     | NA | NA | NA | NA |
| -0.03 | -0.03 | 0.01  | 0.04  | 0.43 | 0.52     | 0.76     | 0.047    | NA | NA | NA | NA |
| 0.02  | 0     | -0.05 | 0     | 0.43 | 0.94     | 3.00E-04 | 0.95     | NA | NA | NA | NA |
| 0.28  | 0.1   | -0.04 | 0.02  | 0.43 | 0.13     | 0.48     | 0.89     | NA | NA | NA | NA |
| -0.03 | -0.08 | -0.03 | 0.05  | 0.43 | 0.031    | 0.2      | 0.11     | NA | NA | NA | NA |
| -0.02 | -0.02 | 0.02  | 0.05  | 0.44 | 0.41     | 0.089    | 0.00023  | NA | NA | NA | NA |
| 0.03  | -0.01 | -0.05 | 0.05  | 0.44 | 0.88     | 0.00099  | 0.0096   | NA | NA | NA | NA |
| -0.02 | -0.01 | -0.01 | 0.06  | 0.44 | 0.68     | 0.58     | 3.00E-07 | NA | NA | NA | NA |
| 0.01  | 0.08  | -0.03 | 0.03  | 0.44 | 4.10E-05 | 0.015    | 0.019    | NA | NA | NA | NA |

|       |       |       |       |      |          |          |          |    |    |    |    |
|-------|-------|-------|-------|------|----------|----------|----------|----|----|----|----|
| 0.03  | 0.01  | -0.03 | 0.06  | 0.44 | 0.79     | 0.15     | 0.0051   | NA | NA | NA | NA |
| -0.08 | -0.04 | 0     | -0.03 | 0.45 | 0.94     | 1        | 0.66     | NA | NA | NA | NA |
| 0.06  | 0.04  | -0.04 | 0.02  | 0.45 | 0.59     | 0.094    | 0.55     | NA | NA | NA | NA |
| 0.03  | 0.02  | -0.06 | -0.03 | 0.45 | 0.71     | 0.00043  | 0.14     | NA | NA | NA | NA |
| 0.02  | -0.02 | -0.01 | 0.01  | 0.46 | 0.48     | 0.41     | 0.45     | NA | NA | NA | NA |
| 0.08  | 0.03  | 0.05  | 0.14  | 0.46 | 0.86     | 0.63     | 0.00062  | NA | NA | NA | NA |
| -0.02 | 0.03  | -0.04 | -0.01 | 0.46 | 0.3      | 0.03     | 0.73     | NA | NA | NA | NA |
| 0.04  | -0.07 | -0.03 | 0.01  | 0.46 | 0.062    | 0.44     | 0.86     | NA | NA | NA | NA |
| -0.02 | 0.05  | -0.03 | 0.06  | 0.46 | 0.065    | 0.023    | 0.00054  | NA | NA | NA | NA |
| -0.09 | -0.09 | 0.08  | 0.1   | 0.47 | 0.33     | 0.0065   | 0.004    | NA | NA | NA | NA |
| 0.03  | 0     | -0.04 | 0     | 0.47 | 1        | 0.015    | 0.91     | NA | NA | NA | NA |
| -0.02 | -0.04 | -0.03 | -0.01 | 0.47 | 0.031    | 0.26     | 0.59     | NA | NA | NA | NA |
| 0.03  | 0.07  | 0     | 0.03  | 0.47 | 0.035    | 0.96     | 0.056    | NA | NA | NA | NA |
| -0.02 | -0.03 | -0.03 | 0     | 0.47 | 0.14     | 0.014    | 0.89     | NA | NA | NA | NA |
| 0.24  | NA    | -0.28 | -0.29 | 0.48 | NA       | 1.60E-05 | 0.23     | NA | NA | NA | NA |
| -0.08 | -0.21 | 0.1   | 0.13  | 0.48 | 0.043    | 0.023    | 0.0059   | NA | NA | NA | NA |
| -0.05 | 0.04  | 0     | 0.08  | 0.48 | 0.55     | 1        | 0.0011   | NA | NA | NA | NA |
| 0.02  | 0.1   | -0.05 | -0.02 | 0.48 | 0.00097  | 0.038    | 0.35     | NA | NA | NA | NA |
| -0.02 | 0.01  | -0.03 | 0.01  | 0.48 | 0.95     | 0.069    | 0.61     | NA | NA | NA | NA |
| -0.03 | 0.2   | -0.05 | -0.05 | 0.48 | 8.40E-08 | 0.015    | 0.013    | NA | NA | NA | NA |
| 0.22  | 0.05  | NA    | NA    | 0.48 | 1        | NA       | NA       | NA | NA | NA | NA |
| -0.16 | 0.1   | 0.05  | 0.37  | 0.48 | 0.63     | 0.35     | 1.80E-09 | NA | NA | NA | NA |
| -0.11 | -0.22 | -0.03 | -0.01 | 0.49 | 0.0049   | 0.78     | 1        | NA | NA | NA | NA |
| -0.08 | 0.17  | -0.01 | 0.06  | 0.49 | 0.19     | 0.76     | 0.071    | NA | NA | NA | NA |
| -0.09 | -0.08 | -0.05 | 0.05  | 0.5  | 0.33     | 0.81     | 0.26     | NA | NA | NA | NA |
| 0.03  | -0.04 | -0.05 | 0.02  | 0.5  | 0.5      | 0.0034   | 0.25     | NA | NA | NA | NA |
| 0.03  | 0.15  | -0.13 | -0.09 | 0.5  | 0.0015   | 3.70E-08 | 0.00059  | NA | NA | NA | NA |
| 0.02  | 0.05  | -0.02 | 0.01  | 0.5  | 0.058    | 0.24     | 0.75     | NA | NA | NA | NA |
| 0.02  | -0.03 | -0.08 | -0.02 | 0.5  | 0.17     | 0.00013  | 0.53     | NA | NA | NA | NA |
| 0.07  | 0.06  | 0.05  | -0.06 | 0.5  | 0.52     | 0.24     | 0.07     | NA | NA | NA | NA |

|       |       |       |       |      |         |          |          |    |    |    |    |
|-------|-------|-------|-------|------|---------|----------|----------|----|----|----|----|
| 0.05  | 0.16  | -0.1  | -0.01 | 0.5  | 0.0057  | 5.70E-06 | 0.77     | NA | NA | NA | NA |
| 0.1   | 0.05  | 0     | 0.01  | 0.51 | 0.59    | 0.96     | 0.7      | NA | NA | NA | NA |
| -0.27 | -0.28 | 0.02  | 0     | 0.51 | 0.46    | 0.46     | 1        | NA | NA | NA | NA |
| -0.03 | -0.01 | -0.03 | -0.01 | 0.51 | 0.77    | 0.017    | 0.64     | NA | NA | NA | NA |
| -0.01 | 0.01  | -0.06 | 0     | 0.51 | 0.54    | 4.40E-09 | 0.89     | NA | NA | NA | NA |
| -0.04 | -0.15 | 0     | 0.09  | 0.51 | 0.00019 | 0.97     | 4.50E-06 | NA | NA | NA | NA |
| -0.01 | 0     | -0.03 | 0.01  | 0.51 | 0.87    | 0.0032   | 0.43     | NA | NA | NA | NA |
| -0.04 | 0.01  | -0.12 | -0.13 | 0.51 | 0.98    | 0.00028  | 1.30E-05 | NA | NA | NA | NA |
| 0.01  | 0.01  | -0.06 | -0.04 | 0.52 | 0.4     | 0.00027  | 0.0083   | NA | NA | NA | NA |
| 0.02  | 0     | -0.04 | 0.04  | 0.52 | 1       | 0.01     | 0.039    | NA | NA | NA | NA |
| 0.06  | 0.07  | 0.08  | 0.3   | 0.52 | 0.41    | 0.071    | 8.90E-08 | NA | NA | NA | NA |
| -0.03 | 0     | -0.04 | 0     | 0.52 | 1       | 0.025    | 1        | NA | NA | NA | NA |
| 0.02  | 0.15  | -0.01 | 0.09  | 0.53 | 0.015   | 0.62     | 0.00012  | NA | NA | NA | NA |
| -0.02 | -0.03 | -0.02 | -0.02 | 0.53 | 0.86    | 0.36     | 0.4      | NA | NA | NA | NA |
| -0.02 | 0.14  | -0.06 | -0.01 | 0.53 | 0.00017 | 0.0051   | 0.81     | NA | NA | NA | NA |
| 0.02  | 0.05  | -0.01 | 0.03  | 0.53 | 0.017   | 0.64     | 0.17     | NA | NA | NA | NA |
| 0.04  | 0     | -0.03 | 0.04  | 0.53 | 1       | 0.027    | 0.029    | NA | NA | NA | NA |
| -0.03 | 0.11  | -0.08 | 0.08  | 0.53 | 0.014   | 0.0019   | 0.0091   | NA | NA | NA | NA |
| 0.04  | -0.01 | -0.06 | 0.04  | 0.53 | 0.85    | 0.019    | 0.17     | NA | NA | NA | NA |
| -0.04 | 0.01  | -0.06 | 0.01  | 0.53 | 0.99    | 0.0021   | 0.74     | NA | NA | NA | NA |
| 0.05  | 0.13  | -0.02 | 0.04  | 0.53 | 0.0012  | 0.27     | 0.024    | NA | NA | NA | NA |
| 0.04  | 0.14  | -0.04 | 0.03  | 0.53 | 0.0032  | 0.13     | 0.38     | NA | NA | NA | NA |
| 0.02  | 0.03  | -0.04 | 0.05  | 0.53 | 0.16    | 0.0019   | 0.0034   | NA | NA | NA | NA |
| 0.04  | 0.06  | -0.1  | -0.01 | 0.54 | 0.62    | 1.20E-05 | 0.81     | NA | NA | NA | NA |
| 0.03  | 0.09  | -0.03 | 0.03  | 0.54 | 0.11    | 0.24     | 0.18     | NA | NA | NA | NA |
| 0.05  | 0.27  | 0     | 0.02  | 0.54 | 0.00021 | 1        | 0.44     | NA | NA | NA | NA |
| -0.05 | -0.11 | -0.08 | -0.04 | 0.54 | 0.017   | 0.012    | 0.25     | NA | NA | NA | NA |
| -0.1  | -0.21 | -0.06 | 0     | 0.54 | 0.0011  | 0.11     | 1        | NA | NA | NA | NA |
| -0.02 | 0     | -0.06 | 0.03  | 0.54 | 1       | 0.00041  | 0.21     | NA | NA | NA | NA |
| -0.02 | -0.01 | -0.04 | 0.02  | 0.54 | 0.92    | 0.0019   | 0.27     | NA | NA | NA | NA |



|       |       |       |       |      |          |          |         |    |    |    |    |
|-------|-------|-------|-------|------|----------|----------|---------|----|----|----|----|
| 0.05  | 0.26  | 0.11  | 0.11  | 0.54 | 0.021    | 0.66     | 0.72    | NA | NA | NA | NA |
| 0.02  | 0.02  | 0.01  | 0.02  | 0.54 | 0.28     | 0.78     | 0.18    | NA | NA | NA | NA |
| -0.03 | -0.08 | -0.01 | -0.02 | 0.55 | 0.015    | 0.71     | 0.34    | NA | NA | NA | NA |
| -0.05 | -0.06 | -0.04 | 0.03  | 0.55 | 0.35     | 0.068    | 0.15    | NA | NA | NA | NA |
| 0.08  | 0.25  | -0.05 | -0.03 | 0.55 | 0.00088  | 0.32     | 0.71    | NA | NA | NA | NA |
| -0.4  | -0.33 | 0.16  | 0.88  | 0.55 | 0.62     | 0.1      | 0.02    | NA | NA | NA | NA |
| -0.09 | 0.07  | 0.09  | 0.08  | 0.55 | 0.67     | 0.016    | 0.057   | NA | NA | NA | NA |
| -0.08 | 0.14  | 0     | 0.07  | 0.55 | 0.44     | 0.95     | 0.054   | NA | NA | NA | NA |
| 0.27  | 0.02  | -0.02 | -0.02 | 0.55 | 1        | 1        | 1       | NA | NA | NA | NA |
| 0.1   | 0.03  | -0.1  | -0.14 | 0.55 | 0.92     | 0.31     | 0.14    | NA | NA | NA | NA |
| -0.06 | -0.07 | -0.04 | -0.01 | 0.56 | 0.34     | 0.6      | 0.92    | NA | NA | NA | NA |
| 0.13  | -0.42 | -0.13 | 0.01  | 0.56 | 3.60E-05 | 4.00E-04 | 0.89    | NA | NA | NA | NA |
| 0.78  | NA    | 0.01  | 0.11  | 0.56 | NA       | 1        | 0.05    | NA | NA | NA | NA |
| 0.39  | 0.89  | -0.05 | -0.01 | 0.56 | 7.30E-06 | 0.13     | 0.76    | NA | NA | NA | NA |
| -0.02 | 0.07  | -0.07 | -0.02 | 0.56 | 0.065    | 0.00046  | 0.48    | NA | NA | NA | NA |
| -0.14 | 0.1   | -0.06 | 0.01  | 0.56 | 0.69     | 0.017    | 0.8     | NA | NA | NA | NA |
| -0.01 | -0.04 | -0.02 | 0.02  | 0.56 | 0.00063  | 0.00058  | 0.014   | NA | NA | NA | NA |
| -0.03 | 0.01  | -0.04 | 0.01  | 0.57 | 0.87     | 0.016    | 0.49    | NA | NA | NA | NA |
| -0.15 | NA    | -0.11 | 0.05  | 0.57 | NA       | 0.01     | 0.76    | NA | NA | NA | NA |
| 0.06  | 0.03  | -0.03 | 0.01  | 0.57 | 0.77     | 0.45     | 0.86    | NA | NA | NA | NA |
| -0.07 | -0.02 | 0.09  | 0.05  | 0.57 | 0.76     | 0.023    | 0.25    | NA | NA | NA | NA |
| 0.04  | 0.07  | 0     | 0.07  | 0.57 | 0.096    | 0.97     | 0.039   | NA | NA | NA | NA |
| -0.05 | 0     | -0.12 | -0.09 | 0.57 | 1        | 0.00061  | 0.023   | NA | NA | NA | NA |
| 0.05  | 0.06  | -0.02 | 0.02  | 0.57 | 0.48     | 0.74     | 0.55    | NA | NA | NA | NA |
| 0.02  | -0.02 | -0.06 | -0.03 | 0.58 | 0.51     | 0.00052  | 0.15    | NA | NA | NA | NA |
| -0.04 | 0.06  | -0.02 | 0.03  | 0.58 | 0.31     | 0.67     | 0.44    | NA | NA | NA | NA |
| -0.11 | 0.08  | 0.09  | 0.38  | 0.58 | 0.88     | 0.34     | 0.00034 | NA | NA | NA | NA |
| -0.12 | -0.1  | -0.02 | 0.03  | 0.58 | 0.6      | 0.65     | 0.79    | NA | NA | NA | NA |
| 0.03  | 0.05  | -0.03 | 0.05  | 0.58 | 0.14     | 0.044    | 0.01    | NA | NA | NA | NA |
| -0.03 | -0.08 | -0.01 | 0.01  | 0.59 | 0.015    | 0.35     | 0.41    | NA | NA | NA | NA |

|       |       |       |       |      |         |          |          |    |    |    |    |
|-------|-------|-------|-------|------|---------|----------|----------|----|----|----|----|
| -0.14 | 0.2   | -0.01 | -0.05 | 0.59 | 0.018   | 0.77     | 0.073    | NA | NA | NA | NA |
| 0.02  | 0.02  | 0.03  | 0.07  | 0.59 | 0.71    | 0.47     | 0.052    | NA | NA | NA | NA |
| 0.09  | 0.38  | -0.02 | 0.09  | 0.59 | 0.046   | 0.48     | 0.0072   | NA | NA | NA | NA |
| 0.07  | 0.16  | -0.06 | 0.02  | 0.6  | 0.053   | 0.00038  | 0.45     | NA | NA | NA | NA |
| -0.05 | 0.15  | -0.04 | 0.07  | 0.6  | 0.014   | 0.1      | 0.023    | NA | NA | NA | NA |
| -0.75 | -0.79 | -0.14 | 0.04  | 0.6  | 0.5     | 0.037    | 0.77     | NA | NA | NA | NA |
| -0.03 | 0.03  | -0.08 | -0.04 | 0.6  | 0.8     | 0.00064  | 0.13     | NA | NA | NA | NA |
| -0.02 | -0.02 | -0.05 | 0.01  | 0.6  | 0.36    | 0.0051   | 0.57     | NA | NA | NA | NA |
| 0.11  | -0.16 | -0.01 | 0.03  | 0.6  | 0.039   | 0.82     | 0.25     | NA | NA | NA | NA |
| 0.01  | 0.01  | -0.07 | -0.01 | 0.6  | 0.49    | 1.10E-05 | 0.49     | NA | NA | NA | NA |
| 0.05  | 0.14  | -0.04 | 0.04  | 0.6  | 0.0012  | 0.015    | 0.039    | NA | NA | NA | NA |
| -0.02 | 0.1   | 0.01  | 0.1   | 0.6  | 0.21    | 0.76     | 4.90E-05 | NA | NA | NA | NA |
| -0.02 | 0.03  | -0.04 | -0.03 | 0.6  | 0.34    | 0.1      | 0.25     | NA | NA | NA | NA |
| -0.03 | 0.02  | 0.04  | 0.08  | 0.6  | 0.67    | 0.028    | 2.60E-05 | NA | NA | NA | NA |
| 0.03  | 0     | -0.02 | 0.06  | 0.6  | 1       | 0.6      | 0.02     | NA | NA | NA | NA |
| 0.02  | 0.09  | -0.04 | 0     | 0.6  | 0.00096 | 0.076    | 1        | NA | NA | NA | NA |
| 0.28  | 0.28  | -0.07 | 0.49  | 0.61 | 0.13    | 0.67     | 0.2      | NA | NA | NA | NA |
| -0.03 | -0.02 | -0.09 | -0.06 | 0.61 | 0.92    | 0.014    | 0.1      | NA | NA | NA | NA |
| -0.15 | NA    | 0.18  | 0.18  | 0.61 | NA      | 0.00016  | 0.00023  | NA | NA | NA | NA |
| -0.16 | -0.19 | -0.12 | -0.09 | 0.61 | 0.088   | 0.0015   | 0.02     | NA | NA | NA | NA |
| -0.02 | 0.04  | -0.05 | 0.01  | 0.61 | 0.21    | 0.00022  | 0.57     | NA | NA | NA | NA |
| 0.02  | 0.14  | -0.02 | 0.02  | 0.62 | 0.0044  | 0.21     | 0.21     | NA | NA | NA | NA |
| -0.02 | -0.06 | -0.08 | 0     | 0.62 | 0.15    | 2.60E-05 | 1        | NA | NA | NA | NA |
| -0.11 | -0.26 | 0.06  | 0.41  | 0.63 | 0.096   | 0.61     | 0.015    | NA | NA | NA | NA |
| -0.02 | 0.03  | 0     | 0.05  | 0.63 | 0.33    | 1        | 0.04     | NA | NA | NA | NA |
| -0.23 | -0.23 | -0.07 | 0.04  | 0.63 | 0.42    | 0.23     | 0.62     | NA | NA | NA | NA |
| 0.22  | -0.03 | -0.02 | 0     | 0.63 | 1       | 0.62     | 1        | NA | NA | NA | NA |
| -0.03 | -0.08 | -0.06 | 0.1   | 0.63 | 0.17    | 0.025    | 0.0098   | NA | NA | NA | NA |
| -0.01 | 0.05  | -0.03 | 0.02  | 0.63 | 0.05    | 0.023    | 0.21     | NA | NA | NA | NA |
| -0.03 | -0.05 | -0.05 | 0.03  | 0.63 | 0.44    | 0.036    | 0.27     | NA | NA | NA | NA |

|       |       |       |       |      |          |          |          |    |    |    |    |
|-------|-------|-------|-------|------|----------|----------|----------|----|----|----|----|
| -0.13 | -0.3  | -0.02 | -0.05 | 0.64 | 0.00039  | 0.81     | 0.24     | NA | NA | NA | NA |
| 0.07  | -0.04 | -0.04 | -0.02 | 0.64 | 0.85     | 0.0091   | 0.4      | NA | NA | NA | NA |
| -0.02 | 0.01  | -0.04 | -0.04 | 0.64 | 0.97     | 0.2      | 0.077    | NA | NA | NA | NA |
| -0.08 | -0.1  | -0.11 | 0.09  | 0.64 | 0.057    | 5.70E-06 | 0.0078   | NA | NA | NA | NA |
| -0.06 | 0.19  | -0.05 | -0.02 | 0.65 | 0.034    | 0.1      | 0.69     | NA | NA | NA | NA |
| -0.02 | -0.06 | -0.05 | -0.06 | 0.65 | 0.0015   | 0.0032   | 0.0019   | NA | NA | NA | NA |
| 0.02  | 0.01  | -0.06 | 0.02  | 0.65 | 0.88     | 0.0025   | 0.42     | NA | NA | NA | NA |
| -0.08 | -0.25 | -0.01 | 0.04  | 0.65 | 0.0048   | 0.84     | 0.47     | NA | NA | NA | NA |
| 0.02  | -0.04 | -0.05 | 0.03  | 0.65 | 0.058    | 0.00027  | 0.027    | NA | NA | NA | NA |
| 0.06  | -0.07 | -0.14 | -0.1  | 0.65 | 0.27     | 0.00018  | 0.026    | NA | NA | NA | NA |
| -0.07 | -0.1  | -0.03 | 0.02  | 0.65 | 0.18     | 0.64     | 0.77     | NA | NA | NA | NA |
| 0.03  | 0.08  | 0.01  | -0.03 | 0.65 | 0.2      | 1        | 0.46     | NA | NA | NA | NA |
| -0.25 | NA    | -0.05 | 0.05  | 0.66 | NA       | 0.86     | 1        | NA | NA | NA | NA |
| -0.11 | NA    | -0.05 | 0.05  | 0.66 | NA       | 0.14     | 0.22     | NA | NA | NA | NA |
| -0.02 | 0     | -0.08 | -0.05 | 0.66 | 1        | 0.00016  | 0.03     | NA | NA | NA | NA |
| -0.02 | 0.11  | -0.03 | 0.02  | 0.67 | 0.015    | 0.62     | 0.73     | NA | NA | NA | NA |
| 0.03  | -0.04 | -0.06 | 0     | 0.67 | 0.27     | 0.2      | 1        | NA | NA | NA | NA |
| 0.03  | -0.02 | -0.05 | 0.01  | 0.68 | 1        | 0.034    | 0.74     | NA | NA | NA | NA |
| -0.03 | 0.05  | 0.01  | 0     | 0.68 | 0.17     | 0.97     | 1        | NA | NA | NA | NA |
| -0.1  | 0.12  | -0.06 | 0.08  | 0.68 | 0.5      | 0.0079   | 0.018    | NA | NA | NA | NA |
| 0.02  | -0.02 | 0.04  | 0.09  | 0.68 | 0.31     | 0.059    | 3.20E-05 | NA | NA | NA | NA |
| -0.02 | 0.17  | 0.02  | 0.02  | 0.69 | 1.30E-06 | 0.5      | 0.37     | NA | NA | NA | NA |
| -0.02 | -0.04 | -0.02 | 0.03  | 0.69 | 0.28     | 0.17     | 0.039    | NA | NA | NA | NA |
| -0.06 | -0.05 | 0.01  | 0.05  | 0.69 | 0.36     | 1        | 0.31     | NA | NA | NA | NA |
| -0.01 | 0.02  | -0.03 | 0.05  | 0.69 | 0.43     | 0.00022  | 1.40E-05 | NA | NA | NA | NA |
| 0.02  | 0.01  | 0     | 0.11  | 0.69 | 0.85     | 1        | 5.60E-06 | NA | NA | NA | NA |
| -0.13 | -0.19 | -0.04 | 0.16  | 0.69 | 0.16     | 0.29     | 0.0029   | NA | NA | NA | NA |
| -0.01 | -0.02 | -0.05 | 0     | 0.69 | 0.24     | 4.70E-06 | 0.99     | NA | NA | NA | NA |
| 0.01  | 0.07  | -0.01 | 0.04  | 0.69 | 0.035    | 0.6      | 0.066    | NA | NA | NA | NA |
| -0.05 | 0.06  | -0.05 | 0.11  | 0.69 | 0.83     | 0.11     | 0.0015   | NA | NA | NA | NA |

|       |       |       |       |      |          |          |          |    |    |    |    |
|-------|-------|-------|-------|------|----------|----------|----------|----|----|----|----|
| 0.01  | 0.04  | -0.02 | -0.01 | 0.69 | 0.23     | 0.37     | 0.81     | NA | NA | NA | NA |
| -0.02 | 0.07  | 0.01  | 0     | 0.7  | 0.071    | 0.9      | 1        | NA | NA | NA | NA |
| 0.02  | -0.01 | -0.01 | 0.01  | 0.7  | 0.96     | 0.7      | 0.59     | NA | NA | NA | NA |
| -0.03 | 0.08  | 0.01  | 0.03  | 0.7  | 0.23     | 0.97     | 0.32     | NA | NA | NA | NA |
| -0.8  | NA    | -0.11 | NA    | 0.7  | NA       | 0.083    | NA       | NA | NA | NA | NA |
| -0.1  | NA    | -0.15 | 0.09  | 0.7  | NA       | 0.0039   | 0.39     | NA | NA | NA | NA |
| 0.03  | 0.01  | -0.03 | -0.04 | 0.7  | 0.88     | 0.28     | 0.14     | NA | NA | NA | NA |
| 0.02  | 0.04  | -0.06 | -0.02 | 0.7  | 0.17     | 0.00017  | 0.24     | NA | NA | NA | NA |
| 0.02  | 0.07  | -0.04 | 0     | 0.7  | 0.18     | 0.016    | 1        | NA | NA | NA | NA |
| -0.04 | 0.08  | 0.06  | -0.04 | 0.71 | 0.18     | 0.22     | 0.28     | NA | NA | NA | NA |
| 0.03  | 0.15  | -0.03 | -0.01 | 0.71 | 0.0042   | 0.2      | 0.49     | NA | NA | NA | NA |
| -0.02 | -0.06 | 0.05  | 0.04  | 0.72 | 0.052    | 0.025    | 0.036    | NA | NA | NA | NA |
| 0.04  | 0.49  | 0.36  | 0.1   | 0.72 | 2.90E-09 | 1.60E-07 | 0.11     | NA | NA | NA | NA |
| -0.01 | 0     | -0.02 | 0.02  | 0.73 | 0.97     | 0.21     | 0.2      | NA | NA | NA | NA |
| 0.08  | -0.05 | -0.18 | -0.12 | 0.73 | 0.8      | 0.0079   | 0.27     | NA | NA | NA | NA |
| -0.01 | 0.09  | -0.07 | -0.02 | 0.73 | 0.11     | 7.30E-05 | 0.25     | NA | NA | NA | NA |
| -0.02 | -0.02 | -0.06 | 0.02  | 0.73 | 0.65     | 0.026    | 0.56     | NA | NA | NA | NA |
| -0.02 | -0.03 | -0.06 | 0.07  | 0.73 | 0.26     | 0.0065   | 0.0072   | NA | NA | NA | NA |
| -0.03 | 0.36  | -0.01 | -0.03 | 0.73 | 0.031    | 0.88     | 0.47     | NA | NA | NA | NA |
| -0.02 | -0.03 | 0.04  | 0.1   | 0.73 | 0.58     | 0.37     | 0.036    | NA | NA | NA | NA |
| -0.01 | 0.09  | 0     | 0.07  | 0.74 | 0.00054  | 0.85     | 4.90E-06 | NA | NA | NA | NA |
| 0.01  | 0.05  | -0.03 | 0.02  | 0.74 | 0.29     | 0.1      | 0.45     | NA | NA | NA | NA |
| 0     | 0.03  | -0.03 | -0.01 | 0.74 | 0.0071   | 0.00059  | 0.36     | NA | NA | NA | NA |
| -0.02 | -0.01 | -0.06 | 0.02  | 0.75 | 0.7      | 8.80E-05 | 0.36     | NA | NA | NA | NA |
| -0.02 | -0.05 | -0.03 | 0.08  | 0.75 | 0.32     | 0.082    | 0.0019   | NA | NA | NA | NA |
| 0.01  | 0.05  | -0.06 | 0.03  | 0.75 | 0.025    | 0.00017  | 0.12     | NA | NA | NA | NA |
| -0.01 | 0.07  | -0.03 | 0.04  | 0.75 | 0.048    | 0.032    | 0.012    | NA | NA | NA | NA |
| -0.03 | 0.03  | -0.01 | 0.05  | 0.75 | 0.72     | 0.52     | 0.052    | NA | NA | NA | NA |
| 0.03  | -0.01 | -0.01 | 0.09  | 0.75 | 1        | 0.76     | 0.00099  | NA | NA | NA | NA |
| 0.23  | 0.36  | 0.02  | 0.12  | 0.75 | 0.45     | 0.81     | 0.093    | NA | NA | NA | NA |

|       |       |       |       |      |          |          |         |    |    |    |    |
|-------|-------|-------|-------|------|----------|----------|---------|----|----|----|----|
| 0.01  | -0.01 | -0.04 | 0.01  | 0.75 | 0.8      | 0.0025   | 0.6     | NA | NA | NA | NA |
| 0.02  | -0.13 | -0.07 | -0.05 | 0.76 | 0.00012  | 0.0066   | 0.034   | NA | NA | NA | NA |
| -0.01 | 0.02  | -0.03 | -0.01 | 0.76 | 0.59     | 0.31     | 0.8     | NA | NA | NA | NA |
| 0.02  | 0.04  | -0.04 | -0.03 | 0.76 | 0.19     | 0.052    | 0.24    | NA | NA | NA | NA |
| -0.01 | 0.02  | -0.05 | -0.03 | 0.76 | 0.32     | 3.60E-05 | 0.072   | NA | NA | NA | NA |
| 0.05  | 0     | -0.24 | -0.12 | 0.76 | 1        | 1.40E-06 | 0.00044 | NA | NA | NA | NA |
| 0.06  | 0.24  | -0.05 | 0.13  | 0.76 | 0.54     | 0.11     | 0.0043  | NA | NA | NA | NA |
| -0.02 | 0.04  | 0.02  | 0.02  | 0.76 | 0.95     | 0.82     | 0.8     | NA | NA | NA | NA |
| -0.01 | 0.07  | -0.02 | 0.02  | 0.76 | 0.019    | 0.23     | 0.13    | NA | NA | NA | NA |
| -0.03 | 0.01  | -0.09 | 0.02  | 0.76 | 0.91     | 0.013    | 0.74    | NA | NA | NA | NA |
| 0.02  | 0.04  | -0.09 | -0.03 | 0.76 | 0.26     | 7.60E-08 | 0.057   | NA | NA | NA | NA |
| -0.02 | 0     | -0.01 | 0.03  | 0.77 | 1        | 0.31     | 0.079   | NA | NA | NA | NA |
| -0.01 | -0.01 | -0.04 | -0.02 | 0.77 | 0.9      | 0.0021   | 0.3     | NA | NA | NA | NA |
| -0.04 | 0.03  | -0.13 | -0.09 | 0.77 | 0.88     | 0.011    | 0.13    | NA | NA | NA | NA |
| -0.03 | 0.01  | -0.03 | 0     | 0.77 | 0.94     | 0.25     | 0.94    | NA | NA | NA | NA |
| 0.01  | 0.07  | -0.05 | 0.05  | 0.77 | 0.041    | 0.022    | 0.081   | NA | NA | NA | NA |
| 0.04  | -0.03 | -0.01 | 0.01  | 0.77 | 0.91     | 0.63     | 0.89    | NA | NA | NA | NA |
| -0.03 | 0.9   | -0.02 | 0.05  | 0.77 | 1.90E-06 | 0.78     | 0.5     | NA | NA | NA | NA |
| -0.02 | 0     | 0.04  | -0.01 | 0.78 | 1        | 0.27     | 0.89    | NA | NA | NA | NA |
| -0.16 | -0.22 | -0.02 | -0.06 | 0.78 | 0.081    | 0.78     | 0.5     | NA | NA | NA | NA |
| 0.01  | 0.01  | -0.06 | 0.04  | 0.78 | 0.58     | 5.10E-05 | 0.0027  | NA | NA | NA | NA |
| -0.03 | -0.07 | -0.06 | 0.02  | 0.78 | 0.18     | 0.0024   | 0.43    | NA | NA | NA | NA |
| -0.01 | 0.06  | -0.01 | 0     | 0.79 | 0.024    | 0.76     | 1       | NA | NA | NA | NA |
| 0.01  | 0.06  | -0.04 | -0.01 | 0.79 | 0.0065   | 0.0067   | 0.44    | NA | NA | NA | NA |
| 0.02  | 0.04  | -0.04 | -0.03 | 0.79 | 0.38     | 0.38     | 0.64    | NA | NA | NA | NA |
| -0.02 | 0.03  | -0.04 | 0.06  | 0.8  | 0.63     | 0.043    | 0.0076  | NA | NA | NA | NA |
| 0.01  | 0.03  | -0.04 | 0     | 0.8  | 0.38     | 0.011    | 0.79    | NA | NA | NA | NA |
| 0.04  | 0.03  | -0.1  | -0.08 | 0.8  | 0.81     | 0.0041   | 0.073   | NA | NA | NA | NA |
| -0.02 | 0.02  | -0.04 | 0.02  | 0.8  | 0.71     | 0.039    | 0.27    | NA | NA | NA | NA |
| -0.05 | -0.02 | -0.1  | -0.11 | 0.8  | 1        | 0.0036   | 0.01    | NA | NA | NA | NA |

|       |       |       |       |      |         |          |          |    |    |    |    |
|-------|-------|-------|-------|------|---------|----------|----------|----|----|----|----|
| -0.1  | -0.12 | -0.09 | 0     | 0.8  | 0.59    | 0.00076  | 1        | NA | NA | NA | NA |
| 0.03  | 0.01  | -0.18 | -0.09 | 0.8  | 1       | 1.50E-06 | 0.046    | NA | NA | NA | NA |
| 0.06  | 0.08  | 0     | 0     | 0.8  | 0.16    | 1        | 1        | NA | NA | NA | NA |
| -0.02 | -0.02 | -0.03 | 0.07  | 0.8  | 0.64    | 0.14     | 0.0047   | NA | NA | NA | NA |
| -0.01 | 0.03  | -0.02 | 0.04  | 0.81 | 0.45    | 0.38     | 0.089    | NA | NA | NA | NA |
| 0.01  | 0.02  | 0.03  | 0.07  | 0.81 | 0.53    | 0.092    | 1.20E-05 | NA | NA | NA | NA |
| 0.05  | 0.03  | 0     | 0.02  | 0.81 | 0.51    | 0.98     | 0.33     | NA | NA | NA | NA |
| 0.63  | -0.03 | 0.71  | 0.71  | 0.81 | 1       | 0.049    | 0.1      | NA | NA | NA | NA |
| 0     | -0.04 | 0     | 0.03  | 0.81 | 0.0085  | 0.9      | 0.053    | NA | NA | NA | NA |
| 0.01  | -0.01 | -0.03 | 0.01  | 0.82 | 0.85    | 0.083    | 0.69     | NA | NA | NA | NA |
| -0.02 | 0.27  | -0.05 | 0.01  | 0.82 | 0.00032 | 0.046    | 0.81     | NA | NA | NA | NA |
| -0.03 | -0.12 | -0.13 | 0.03  | 0.82 | 0.77    | 0.002    | 0.59     | NA | NA | NA | NA |
| -0.01 | 0.01  | -0.04 | 0.06  | 0.82 | 0.86    | 0.0026   | 6.60E-05 | NA | NA | NA | NA |
| 0.01  | -0.04 | -0.02 | 0.04  | 0.82 | 0.23    | 0.45     | 0.057    | NA | NA | NA | NA |
| -0.03 | -0.13 | -0.03 | -0.03 | 0.83 | 0.13    | 0.53     | 0.43     | NA | NA | NA | NA |
| -0.12 | -0.15 | -0.06 | NA    | 0.83 | 0.63    | 0.46     | NA       | NA | NA | NA | NA |
| -0.01 | 0.02  | -0.02 | 0.05  | 0.83 | 0.58    | 0.46     | 0.051    | NA | NA | NA | NA |
| -0.11 | -0.24 | -0.2  | -0.18 | 0.83 | 0.24    | 4.00E-04 | 0.031    | NA | NA | NA | NA |
| 0.01  | -0.04 | 0     | -0.02 | 0.83 | 0.32    | 0.95     | 0.18     | NA | NA | NA | NA |
| 0.02  | 0.27  | -0.05 | 0.04  | 0.83 | 0.00018 | 0.13     | 0.38     | NA | NA | NA | NA |
| 0.05  | 0.18  | 0.07  | 0.2   | 0.83 | 0.29    | 0.14     | 0.00015  | NA | NA | NA | NA |
| -0.01 | 0.03  | -0.06 | 0.01  | 0.83 | 0.23    | 2.50E-06 | 0.73     | NA | NA | NA | NA |
| 0.02  | -0.02 | -0.06 | -0.04 | 0.83 | 1       | 0.069    | 0.37     | NA | NA | NA | NA |
| 0.02  | -0.06 | -0.06 | 0     | 0.84 | 0.72    | 0.2      | 1        | NA | NA | NA | NA |
| -0.61 | -0.69 | 0.17  | 0.1   | 0.84 | 0.72    | 0.021    | 0.15     | NA | NA | NA | NA |
| -0.02 | 0.16  | -0.01 | 0.02  | 0.84 | 0.028   | 0.55     | 0.36     | NA | NA | NA | NA |
| 0.03  | 0.02  | 0     | 0.11  | 0.84 | 0.66    | 1        | 0.00038  | NA | NA | NA | NA |
| 0.02  | 0.13  | -0.04 | 0.02  | 0.84 | 0.069   | 0.15     | 0.73     | NA | NA | NA | NA |
| 0.01  | 0.03  | -0.05 | -0.04 | 0.84 | 0.44    | 0.0091   | 0.058    | NA | NA | NA | NA |
| 0.01  | 0.06  | -0.03 | 0.05  | 0.84 | 0.016   | 0.0017   | 1.10E-05 | NA | NA | NA | NA |

|       |       |       |       |      |         |          |          |    |    |    |    |
|-------|-------|-------|-------|------|---------|----------|----------|----|----|----|----|
| -0.01 | 0     | -0.07 | -0.04 | 0.84 | 0.91    | 0.00095  | 0.086    | NA | NA | NA | NA |
| 0.01  | 0.01  | -0.03 | 0.13  | 0.84 | 0.9     | 0.14     | 3.80E-07 | NA | NA | NA | NA |
| -0.01 | -0.05 | -0.03 | -0.01 | 0.85 | 0.0026  | 0.014    | 0.33     | NA | NA | NA | NA |
| 0     | 0.03  | -0.04 | 0.04  | 0.85 | 0.081   | 0.0092   | 0.038    | NA | NA | NA | NA |
| 0.04  | 0.44  | 0     | 0.13  | 0.85 | 0.0019  | 1        | 0.015    | NA | NA | NA | NA |
| 0.02  | 0     | -0.07 | -0.02 | 0.85 | 0.98    | 1.50E-05 | 0.37     | NA | NA | NA | NA |
| -0.03 | 0.36  | -0.04 | 0.07  | 0.85 | 0.017   | 0.65     | 0.19     | NA | NA | NA | NA |
| -0.02 | -0.01 | -0.03 | -0.01 | 0.85 | 1       | 0.89     | 1        | NA | NA | NA | NA |
| -0.01 | 0     | -0.07 | -0.08 | 0.85 | 1       | 0.00049  | 0.00042  | NA | NA | NA | NA |
| 0.01  | -0.1  | -0.06 | 0     | 0.85 | 0.014   | 0.038    | 1        | NA | NA | NA | NA |
| 0.05  | 0     | 0.02  | 0.01  | 0.85 | 1       | 0.6      | 0.9      | NA | NA | NA | NA |
| 0.04  | -0.05 | -0.08 | 0     | 0.86 | 0.66    | 0.0094   | 1        | NA | NA | NA | NA |
| 0     | 0.06  | -0.02 | 0.03  | 0.86 | 0.019   | 0.17     | 0.056    | NA | NA | NA | NA |
| -0.05 | 0.23  | -0.1  | -0.07 | 0.86 | 0.25    | 6.00E-04 | 0.043    | NA | NA | NA | NA |
| 0.01  | 0.08  | 0.02  | 0.03  | 0.86 | 0.2     | 0.77     | 0.33     | NA | NA | NA | NA |
| -0.03 | -0.1  | -0.06 | -0.03 | 0.86 | 0.097   | 0.052    | 0.34     | NA | NA | NA | NA |
| 0.06  | 0.06  | -0.06 | 0.17  | 0.86 | 1       | 0.65     | 0.76     | NA | NA | NA | NA |
| -0.01 | -0.07 | -0.01 | 0.07  | 0.86 | 0.015   | 0.73     | 3.60E-08 | NA | NA | NA | NA |
| 0.02  | 0.11  | -0.03 | -0.04 | 0.87 | 0.094   | 0.42     | 0.24     | NA | NA | NA | NA |
| -0.01 | 0.02  | -0.04 | -0.04 | 0.87 | 0.49    | 0.007    | 0.0026   | NA | NA | NA | NA |
| -0.02 | 0.06  | -0.03 | 0.12  | 0.87 | 0.3     | 0.2      | 0.00021  | NA | NA | NA | NA |
| -0.02 | 0.01  | -0.01 | 0.05  | 0.87 | 0.98    | 0.79     | 0.022    | NA | NA | NA | NA |
| -0.01 | 0.1   | -0.01 | 0.07  | 0.88 | 0.00015 | 0.66     | 2.60E-05 | NA | NA | NA | NA |
| 0     | -0.01 | 0     | 0.04  | 0.88 | 0.8     | 0.88     | 0.0031   | NA | NA | NA | NA |
| 0     | 0     | -0.02 | 0.02  | 0.88 | 0.96    | 0.066    | 0.15     | NA | NA | NA | NA |
| 0.01  | -0.04 | -0.03 | 0     | 0.88 | 0.16    | 0.046    | 0.84     | NA | NA | NA | NA |
| 0     | 0.01  | -0.05 | -0.04 | 0.89 | 0.7     | 0.00031  | 0.0023   | NA | NA | NA | NA |
| -0.02 | 0.03  | 0.02  | 0.01  | 0.89 | 0.32    | 0.64     | 0.9      | NA | NA | NA | NA |
| -0.01 | 0.21  | -0.07 | 0.03  | 0.89 | 0.00031 | 0.00028  | 0.38     | NA | NA | NA | NA |
| -0.03 | -0.1  | -0.08 | -0.01 | 0.89 | 0.14    | 0.2      | 1        | NA | NA | NA | NA |

|       |       |       |       |      |         |          |          |    |    |    |    |
|-------|-------|-------|-------|------|---------|----------|----------|----|----|----|----|
| -0.01 | 0.04  | -0.05 | 0.08  | 0.89 | 0.2     | 0.022    | 0.0023   | NA | NA | NA | NA |
| -0.04 | -0.02 | 0.07  | 0.12  | 0.89 | 0.72    | 0.28     | 0.071    | NA | NA | NA | NA |
| -0.01 | 0.11  | -0.06 | -0.01 | 0.89 | 0.00046 | 0.00029  | 0.66     | NA | NA | NA | NA |
| -0.01 | 0.05  | -0.05 | 0     | 0.9  | 0.1     | 0.0096   | 0.98     | NA | NA | NA | NA |
| 0.01  | 0.09  | -0.02 | 0.03  | 0.9  | 0.0019  | 0.13     | 0.014    | NA | NA | NA | NA |
| 0.03  | 0.16  | -0.05 | 0.01  | 0.9  | 0.14    | 0.082    | 0.79     | NA | NA | NA | NA |
| -0.02 | 0.11  | 0.01  | 0.08  | 0.9  | 0.021   | 0.87     | 0.0032   | NA | NA | NA | NA |
| 0.01  | 0.08  | -0.01 | 0.01  | 0.9  | 0.0072  | 0.73     | 0.38     | NA | NA | NA | NA |
| -0.01 | 0.04  | 0.06  | 0.1   | 0.9  | 0.54    | 0.0094   | 2.30E-06 | NA | NA | NA | NA |
| -0.1  | -0.03 | -0.12 | -0.04 | 0.91 | 0.89    | 0.00052  | 0.42     | NA | NA | NA | NA |
| 0.1   | 0.5   | 0.05  | -0.01 | 0.91 | 0.061   | 0.29     | 1        | NA | NA | NA | NA |
| 0.01  | 0.02  | 0     | 0.08  | 0.91 | 0.79    | 1        | 0.00024  | NA | NA | NA | NA |
| 0.04  | -0.12 | -0.04 | 0     | 0.91 | 0.013   | 0.16     | 0.93     | NA | NA | NA | NA |
| -0.03 | 0.05  | -0.04 | 0.07  | 0.92 | 0.7     | 0.24     | 0.031    | NA | NA | NA | NA |
| 0     | 0     | -0.03 | 0.01  | 0.92 | 0.99    | 0.055    | 0.7      | NA | NA | NA | NA |
| 0     | 0.02  | -0.02 | -0.02 | 0.92 | 0.38    | 0.27     | 0.19     | NA | NA | NA | NA |
| 0.09  | 0.05  | -0.09 | -0.07 | 0.92 | 0.88    | 0.024    | 0.053    | NA | NA | NA | NA |
| 0.01  | 0.03  | -0.05 | 0.05  | 0.92 | 0.49    | 0.012    | 0.062    | NA | NA | NA | NA |
| -0.01 | 0.05  | 0.12  | 0.08  | 0.92 | 0.33    | 0.00027  | 0.014    | NA | NA | NA | NA |
| -0.01 | 0.01  | -0.07 | -0.03 | 0.92 | 0.65    | 0.003    | 0.084    | NA | NA | NA | NA |
| 0.02  | 0.02  | -0.06 | 0     | 0.92 | 0.56    | 0.00015  | 0.86     | NA | NA | NA | NA |
| 0.02  | 0.31  | -0.04 | 0.01  | 0.92 | 0.0023  | 0.048    | 0.85     | NA | NA | NA | NA |
| 0.29  | -0.03 | 0.04  | 0.22  | 0.93 | 0.94    | 0.26     | 4.90E-09 | NA | NA | NA | NA |
| -0.01 | 0.05  | -0.06 | 0.04  | 0.93 | 0.23    | 0.0016   | 0.043    | NA | NA | NA | NA |
| 0.01  | 0.07  | -0.04 | 0.04  | 0.94 | 0.07    | 0.013    | 0.021    | NA | NA | NA | NA |
| 0.01  | 0.19  | -0.07 | 0.11  | 0.94 | 0.038   | 0.0063   | 0.0014   | NA | NA | NA | NA |
| 0.03  | 0     | -0.02 | -0.01 | 0.94 | 1       | 0.78     | 0.96     | NA | NA | NA | NA |
| 0.01  | 0.01  | -0.09 | -0.07 | 0.94 | 1       | 4.60E-05 | 0.0011   | NA | NA | NA | NA |
| -0.03 | 0.31  | 0.07  | 0.08  | 0.94 | 0.4     | 0.19     | 0.05     | NA | NA | NA | NA |
| -0.02 | -0.02 | -0.09 | 0     | 0.94 | 0.76    | 0.007    | 1        | NA | NA | NA | NA |



|       |       |       |       |      |          |          |          |    |    |    |    |
|-------|-------|-------|-------|------|----------|----------|----------|----|----|----|----|
| 0.06  | 0.34  | -0.04 | 0.09  | 0.95 | 0.11     | 0.25     | 0.016    | NA | NA | NA | NA |
| 0.02  | 0.27  | 0.02  | 0.14  | 0.95 | 0.0038   | 0.86     | 0.1      | NA | NA | NA | NA |
| 0.01  | 0.21  | 0.08  | 0.14  | 0.95 | 0.017    | 0.24     | 0.033    | NA | NA | NA | NA |
| 0.1   | 0.6   | 0.02  | -0.01 | 0.95 | 0.034    | 1        | 1        | NA | NA | NA | NA |
| 0.01  | 0.08  | 0     | 0.12  | 0.96 | 0.24     | 0.91     | 3.90E-05 | NA | NA | NA | NA |
| -0.02 | 0.04  | -0.07 | -0.09 | 0.96 | 0.63     | 0.04     | 0.0076   | NA | NA | NA | NA |
| 0.01  | 0     | -0.09 | -0.04 | 0.96 | 1        | 0.00053  | 0.12     | NA | NA | NA | NA |
| 0     | -0.02 | -0.06 | -0.02 | 0.96 | 0.61     | 9.70E-05 | 0.35     | NA | NA | NA | NA |
| -0.03 | -0.04 | -0.04 | 0.07  | 0.97 | 0.86     | 0.35     | 0.14     | NA | NA | NA | NA |
| 0     | -0.01 | -0.03 | 0.02  | 0.97 | 0.42     | 0.0057   | 0.083    | NA | NA | NA | NA |
| 0.02  | 0.02  | -0.01 | -0.05 | 0.97 | 1        | 1        | 0.72     | NA | NA | NA | NA |
| 0.01  | -0.06 | -0.03 | 0.05  | 0.97 | 0.083    | 0.16     | 0.034    | NA | NA | NA | NA |
| 0.05  | 0.07  | -0.03 | 0.06  | 0.97 | 0.69     | 0.43     | 0.075    | NA | NA | NA | NA |
| 0.02  | 0.17  | -0.01 | -0.09 | 0.97 | 0.051    | 0.85     | 0.035    | NA | NA | NA | NA |
| 0.02  | -0.06 | 0.01  | 0.08  | 0.97 | 0.69     | 1        | 0.6      | NA | NA | NA | NA |
| -0.01 | 0.04  | -0.08 | -0.06 | 0.97 | 0.59     | 0.042    | 0.55     | NA | NA | NA | NA |
| 0.06  | 0.26  | -0.24 | NA    | 0.97 | 0.1      | 0.0065   | NA       | NA | NA | NA | NA |
| 0.01  | -0.02 | 0.01  | 0.08  | 0.97 | 0.71     | 0.46     | 6.10E-05 | NA | NA | NA | NA |
| 0.01  | 0.12  | -0.1  | -0.05 | 0.97 | 0.051    | 0.00047  | 0.081    | NA | NA | NA | NA |
| -0.04 | 0.01  | -0.03 | -0.05 | 0.97 | 1        | 0.47     | 0.13     | NA | NA | NA | NA |
| 0     | 0.01  | -0.02 | 0.03  | 0.98 | 0.74     | 0.29     | 0.18     | NA | NA | NA | NA |
| -0.01 | 0.01  | 0.03  | 0.13  | 0.98 | 1        | 0.54     | 0.001    | NA | NA | NA | NA |
| 0.02  | 0.6   | 0.1   | 0.38  | 0.98 | 1.50E-09 | 0.13     | 0.00011  | NA | NA | NA | NA |
| 0.01  | 0.03  | 0     | -0.01 | 0.99 | 0.2      | 0.93     | 0.67     | NA | NA | NA | NA |
| -0.01 | 0.05  | -0.06 | 0     | 0.99 | 0.17     | 0.011    | 1        | NA | NA | NA | NA |
| 0     | -0.02 | -0.01 | 0.01  | 0.99 | 0.56     | 0.74     | 0.81     | NA | NA | NA | NA |
| 0.01  | -0.07 | 0.02  | 0.09  | 0.99 | 0.15     | 0.59     | 0.0055   | NA | NA | NA | NA |
| 0.04  | -0.05 | -0.12 | -0.09 | 0.99 | 0.72     | 1.20E-05 | 0.003    | NA | NA | NA | NA |
| 0     | -0.1  | -0.1  | -0.06 | 1    | 0.019    | 0.00088  | 0.099    | NA | NA | NA | NA |
| 0     | -0.03 | -0.01 | 0.02  | 1    | 0.71     | 0.6      | 0.42     | NA | NA | NA | NA |

|       |       |       |       |   |         |          |          |    |    |    |    |
|-------|-------|-------|-------|---|---------|----------|----------|----|----|----|----|
| -0.07 | -0.01 | -0.05 | 0.01  | 1 | 1       | 0.062    | 0.88     | NA | NA | NA | NA |
| 0.01  | 0.07  | -0.11 | -0.08 | 1 | 0.57    | 0.00015  | 0.01     | NA | NA | NA | NA |
| 0.01  | 0.08  | -0.01 | -0.01 | 1 | 0.24    | 0.83     | 0.71     | NA | NA | NA | NA |
| -0.17 | 0.5   | 0.05  | 0.16  | 1 | 1       | 1        | 1        | NA | NA | NA | NA |
| -0.01 | -0.06 | -0.01 | 0.14  | 1 | 0.26    | 0.7      | 4.00E-05 | NA | NA | NA | NA |
| -0.02 | 0.25  | -0.06 | 0.43  | 1 | 0.36    | 0.35     | 1.40E-05 | NA | NA | NA | NA |
| -0.01 | 0.18  | 0     | 0.03  | 1 | 0.034   | 0.97     | 0.25     | NA | NA | NA | NA |
| -0.01 | 0.11  | -0.03 | -0.07 | 1 | 0.019   | 0.2      | 0.0052   | NA | NA | NA | NA |
| 0     | 0.06  | -0.04 | 0.11  | 1 | 0.71    | 0.28     | 0.0064   | NA | NA | NA | NA |
| 0.02  | 0.05  | -0.01 | 0.12  | 1 | 0.61    | 0.7      | 0.00065  | NA | NA | NA | NA |
| 0     | -0.15 | -0.03 | -0.01 | 1 | 0.00049 | 0.15     | 0.76     | NA | NA | NA | NA |
| 0.09  | 0.04  | 0.09  | 0.03  | 1 | 0.87    | 0.043    | 0.65     | NA | NA | NA | NA |
| -0.1  | -0.18 | -0.06 | 0.07  | 1 | 0.86    | 0.068    | 0.22     | NA | NA | NA | NA |
| -0.01 | -0.03 | -0.01 | 0.02  | 1 | 1       | 0.84     | 0.78     | NA | NA | NA | NA |
| 0.09  | -0.03 | 0.02  | 0.12  | 1 | 1       | 0.76     | 0.0079   | NA | NA | NA | NA |
| -0.25 | NA    | -0.01 | 0     | 1 | NA      | 0.75     | 1        | NA | NA | NA | NA |
| 0     | 0.03  | -0.03 | 0.06  | 1 | 0.16    | 0.14     | 0.0041   | NA | NA | NA | NA |
| 0     | 0.05  | -0.03 | 0.09  | 1 | 0.27    | 0.099    | 0.00019  | NA | NA | NA | NA |
| -0.01 | 0.02  | -0.08 | -0.12 | 1 | 0.78    | 0.01     | 0.00092  | NA | NA | NA | NA |
| -0.02 | 0.22  | 0.03  | 0.18  | 1 | 0.0054  | 0.38     | 4.80E-06 | NA | NA | NA | NA |
| 0     | 0.05  | -0.02 | 0.05  | 1 | 0.013   | 0.53     | 0.045    | NA | NA | NA | NA |
| 0     | 0.16  | -0.03 | 0.02  | 1 | 0.023   | 0.45     | 0.66     | NA | NA | NA | NA |
| 0.01  | 0.03  | -0.04 | -0.02 | 1 | 0.79    | 0.039    | 0.45     | NA | NA | NA | NA |
| 0     | 0.03  | -0.02 | 0.01  | 1 | 0.52    | 0.33     | 0.73     | NA | NA | NA | NA |
| 0     | 0.1   | -0.15 | -0.06 | 1 | 0.34    | 7.50E-06 | 0.19     | NA | NA | NA | NA |
| 0.01  | -0.07 | -0.18 | 0.02  | 1 | 0.34    | 7.00E-07 | 0.88     | NA | NA | NA | NA |
| 0.01  | 0.02  | -0.01 | 0.01  | 1 | 0.66    | 0.51     | 0.75     | NA | NA | NA | NA |
| -0.04 | 0.19  | -0.11 | -0.05 | 1 | 0.37    | 0.072    | 0.49     | NA | NA | NA | NA |
| 0     | -0.01 | -0.03 | -0.01 | 1 | 0.9     | 0.14     | 0.52     | NA | NA | NA | NA |
| -0.09 | -0.04 | -0.08 | -0.05 | 1 | 1       | 0.11     | 0.28     | NA | NA | NA | NA |

|       |       |       |       |   |          |          |          |    |    |    |    |
|-------|-------|-------|-------|---|----------|----------|----------|----|----|----|----|
| 0     | -0.01 | -0.02 | 0.08  | 1 | 0.8      | 0.21     | 2.90E-05 | NA | NA | NA | NA |
| 0.01  | -0.07 | -0.08 | -0.05 | 1 | 0.042    | 0.00043  | 0.045    | NA | NA | NA | NA |
| 0     | 0.19  | -0.07 | 0.01  | 1 | 0.00012  | 0.00094  | 0.82     | NA | NA | NA | NA |
| 0     | 0.04  | -0.01 | 0.07  | 1 | 0.28     | 0.55     | 0.00053  | NA | NA | NA | NA |
| 0.01  | -0.05 | 0.01  | -0.06 | 1 | 0.66     | 0.81     | 0.058    | NA | NA | NA | NA |
| -0.02 | 0.03  | -0.05 | -0.02 | 1 | 0.66     | 0.22     | 0.62     | NA | NA | NA | NA |
| 0     | 0.04  | -0.05 | 0     | 1 | 0.11     | 0.00021  | 0.91     | NA | NA | NA | NA |
| 0.04  | -0.11 | -0.05 | 0.05  | 1 | 0.056    | 0.12     | 0.2      | NA | NA | NA | NA |
| 0     | 0     | -0.08 | 0.01  | 1 | 1        | 0.079    | 1        | NA | NA | NA | NA |
| -0.17 | 0     | -0.02 | NA    | 1 | 1        | 0.73     | NA       | NA | NA | NA | NA |
| 0.02  | -0.01 | -0.13 | -0.04 | 1 | 1        | 0.00058  | 0.41     | NA | NA | NA | NA |
| -0.06 | 0.08  | 0.03  | 0.2   | 1 | 0.78     | 0.47     | 6.70E-05 | NA | NA | NA | NA |
| 0     | 0.28  | -0.07 | -0.04 | 1 | 1.10E-05 | 0.0056   | 0.3      | NA | NA | NA | NA |
| 0     | 0.01  | -0.08 | -0.01 | 1 | 0.82     | 2.70E-05 | 0.6      | NA | NA | NA | NA |
| 0     | 0     | 0.03  | -0.04 | 1 | 1        | 0.46     | 0.24     | NA | NA | NA | NA |
| -0.01 | 0.12  | -0.21 | -0.09 | 1 | 0.56     | 8.70E-06 | 0.22     | NA | NA | NA | NA |
| 0.06  | -0.2  | -0.11 | -0.04 | 1 | 0.36     | 0.018    | 0.42     | NA | NA | NA | NA |
| 0.05  | -0.1  | 0     | 0.03  | 1 | 1        | 1        | 0.84     | NA | NA | NA | NA |
| 0     | 0.09  | 0.01  | -0.04 | 1 | 0.12     | 0.88     | 0.19     | NA | NA | NA | NA |
| -0.01 | -0.17 | -0.06 | 0.22  | 1 | 0.04     | 0.64     | 0.066    | NA | NA | NA | NA |
| 0.01  | -0.06 | 0.01  | 0.04  | 1 | 0.4      | 0.73     | 0.26     | NA | NA | NA | NA |
| 0.17  | NA    | -0.04 | NA    | 1 | NA       | 0.95     | NA       | NA | NA | NA | NA |
| 0.01  | 0.06  | -0.07 | -0.05 | 1 | 0.075    | 0.0019   | 0.13     | NA | NA | NA | NA |
| 0     | 0.05  | -0.08 | -0.03 | 1 | 0.24     | 0.00053  | 0.2      | NA | NA | NA | NA |
| 0     | 0.02  | 0     | 0.05  | 1 | 0.68     | 0.89     | 0.00058  | NA | NA | NA | NA |
| 0.01  | -0.06 | 0.01  | 0.08  | 1 | 0.19     | 0.63     | 8.40E-05 | NA | NA | NA | NA |
| 0     | 0.02  | -0.09 | -0.06 | 1 | 0.47     | 5.60E-06 | 0.0011   | NA | NA | NA | NA |
| 0     | -0.01 | -0.05 | 0     | 1 | 0.82     | 0.0038   | 0.92     | NA | NA | NA | NA |
| 0     | 0.07  | -0.01 | -0.03 | 1 | 0.045    | 0.88     | 0.3      | NA | NA | NA | NA |
| -0.04 | NA    | -0.03 | 0.11  | 1 | NA       | 0.47     | 0.12     | NA | NA | NA | NA |

|       |       |       |       |   |          |          |         |    |    |    |    |
|-------|-------|-------|-------|---|----------|----------|---------|----|----|----|----|
| 0.01  | -0.12 | 0.01  | 0.07  | 1 | 0.37     | 0.78     | 0.054   | NA | NA | NA | NA |
| 0.01  | 0     | 0     | 0.08  | 1 | 1        | 0.96     | 0.0014  | NA | NA | NA | NA |
| -0.02 | -0.17 | -0.03 | 0.07  | 1 | 0.0043   | 0.12     | 0.0077  | NA | NA | NA | NA |
| -0.01 | -0.02 | -0.03 | 0.02  | 1 | 0.55     | 0.31     | 0.6     | NA | NA | NA | NA |
| 0     | 0.05  | -0.08 | -0.02 | 1 | 0.023    | 7.00E-09 | 0.23    | NA | NA | NA | NA |
| 0     | 0.02  | -0.01 | 0.04  | 1 | 0.45     | 0.32     | 0.0061  | NA | NA | NA | NA |
| 0     | 0.05  | -0.05 | 0.13  | 1 | 1        | 0.32     | 0.0054  | NA | NA | NA | NA |
| 0.02  | NA    | -0.04 | 0.02  | 1 | NA       | 0.28     | 0.61    | NA | NA | NA | NA |
| 0.02  | 0.01  | -0.03 | 0     | 1 | 1        | 0.21     | 0.9     | NA | NA | NA | NA |
| 0     | -0.03 | -0.06 | 0.02  | 1 | 0.05     | 0.0013   | 0.34    | NA | NA | NA | NA |
| -0.01 | 0     | -0.1  | -0.05 | 1 | 1        | 3.30E-05 | 0.2     | NA | NA | NA | NA |
| -0.01 | 0.12  | 0     | 0.02  | 1 | 0.4      | 1        | 0.99    | NA | NA | NA | NA |
| 0     | 0.01  | -0.08 | -0.03 | 1 | 1        | 0.00026  | 0.38    | NA | NA | NA | NA |
| 0     | 0.16  | -0.04 | -0.01 | 1 | 5.30E-07 | 0.017    | 0.54    | NA | NA | NA | NA |
| -0.05 | -0.2  | 0     | 0.07  | 1 | 2.50E-05 | 1        | 0.0023  | NA | NA | NA | NA |
| -0.04 | -0.08 | -0.05 | 0.05  | 1 | 0.5      | 0.056    | 0.16    | NA | NA | NA | NA |
| 0     | -0.01 | -0.08 | -0.05 | 1 | 0.79     | 1.90E-06 | 0.012   | NA | NA | NA | NA |
| 0.01  | 0     | -0.02 | 0.02  | 1 | 1        | 0.67     | 0.65    | NA | NA | NA | NA |
| 0.02  | 0.04  | -0.09 | -0.06 | 1 | 0.77     | 0.0039   | 0.071   | NA | NA | NA | NA |
| 0     | 0.01  | -0.04 | -0.05 | 1 | 0.66     | 0.055    | 0.003   | NA | NA | NA | NA |
| 0.67  | NA    | -0.12 | -0.04 | 1 | NA       | 0.2      | 0.84    | NA | NA | NA | NA |
| 0     | 0.1   | 0.04  | 0.14  | 1 | 0.62     | 0.33     | 0.0015  | NA | NA | NA | NA |
| 0     | -0.01 | -0.03 | 0.01  | 1 | 0.81     | 0.066    | 0.68    | NA | NA | NA | NA |
| -0.01 | -0.16 | -0.07 | 0.15  | 1 | 0.041    | 0.016    | 0.015   | NA | NA | NA | NA |
| 0     | 0.01  | -0.12 | -0.1  | 1 | 1        | 0.00018  | 0.00091 | NA | NA | NA | NA |
| -0.01 | -0.05 | -0.05 | 0     | 1 | 0.35     | 0.049    | 0.99    | NA | NA | NA | NA |
| -0.01 | 0.23  | -0.09 | -0.06 | 1 | 0.0048   | 8.10E-06 | 0.02    | NA | NA | NA | NA |
| 0.06  | 0.01  | 0.26  | 0     | 1 | 1        | 9.70E-05 | 1       | NA | NA | NA | NA |
| -0.01 | 0.06  | -0.02 | -0.05 | 1 | 0.6      | 0.63     | 0.076   | NA | NA | NA | NA |
| 0     | 0.22  | -0.03 | 0.01  | 1 | 0.0015   | 0.29     | 0.87    | NA | NA | NA | NA |

|       |       |       |       |   |          |          |          |    |    |    |    |
|-------|-------|-------|-------|---|----------|----------|----------|----|----|----|----|
| -0.01 | 0.2   | -0.05 | 0.01  | 1 | 0.17     | 0.079    | 1        | NA | NA | NA | NA |
| 0     | 0.06  | -0.09 | -0.06 | 1 | 0.26     | 2.20E-05 | 0.017    | NA | NA | NA | NA |
| -0.02 | -0.01 | 0.05  | 0.02  | 1 | 1        | 0.28     | 0.56     | NA | NA | NA | NA |
| 0.03  | 0.22  | -0.07 | -0.01 | 1 | 0.22     | 0.0038   | 0.66     | NA | NA | NA | NA |
| 0     | 0.01  | -0.12 | -0.09 | 1 | 0.74     | 3.10E-05 | 0.00047  | NA | NA | NA | NA |
| 0     | 0     | 0.01  | 0.03  | 1 | 1        | 0.55     | 0.061    | NA | NA | NA | NA |
| 0     | -0.03 | -0.04 | 0.02  | 1 | 0.7      | 0.037    | 0.46     | NA | NA | NA | NA |
| -0.02 | 0.06  | 0.01  | 0.01  | 1 | 0.76     | 0.68     | 0.92     | NA | NA | NA | NA |
| -0.01 | 0.27  | -0.03 | 0.03  | 1 | 0.00053  | 0.6      | 0.58     | NA | NA | NA | NA |
| -0.02 | -0.09 | 0     | -0.01 | 1 | 0.28     | 1        | 0.97     | NA | NA | NA | NA |
| 0.01  | 0.07  | -0.01 | 0.04  | 1 | 0.34     | 0.84     | 0.22     | NA | NA | NA | NA |
| -0.01 | -0.06 | 0.04  | 0.09  | 1 | 0.26     | 0.34     | 0.024    | NA | NA | NA | NA |
| 0.04  | NA    | -0.02 | -0.05 | 1 | NA       | 0.79     | 0.32     | NA | NA | NA | NA |
| 0     | 0     | -0.04 | 0     | 1 | 0.93     | 0.002    | 0.82     | NA | NA | NA | NA |
| 0     | -0.01 | -0.04 | 0.06  | 1 | 0.61     | 2.00E-04 | 4.90E-05 | NA | NA | NA | NA |
| 0     | 0.09  | -0.05 | 0.13  | 1 | 0.89     | 0.36     | 0.028    | NA | NA | NA | NA |
| 0.03  | 0.02  | -0.08 | -0.06 | 1 | 0.79     | 0.088    | 0.22     | NA | NA | NA | NA |
| 0     | -0.39 | 0.03  | 0.1   | 1 | 0.72     | 0.24     | 0.0054   | NA | NA | NA | NA |
| 0     | 0.35  | -0.01 | 0.01  | 1 | 3.10E-07 | 0.8      | 0.78     | NA | NA | NA | NA |
| -0.01 | 0     | -0.08 | 0.01  | 1 | 1        | 0.00054  | 0.76     | NA | NA | NA | NA |
| -0.01 | 0.01  | -0.08 | 0.04  | 1 | 1        | 4.20E-05 | 0.087    | NA | NA | NA | NA |
| -0.01 | 0.02  | 0.06  | 0.18  | 1 | 1        | 0.066    | 4.70E-05 | NA | NA | NA | NA |
| -0.01 | 0.04  | 0     | 0.05  | 1 | 0.7      | 1        | 0.1      | NA | NA | NA | NA |
| 0.01  | 0.18  | -0.05 | -0.01 | 1 | 0.62     | 0.24     | 1        | NA | NA | NA | NA |
| -0.04 | -0.11 | -0.06 | 0.02  | 1 | 0.53     | 0.16     | 0.68     | NA | NA | NA | NA |
| 0     | 0.04  | -0.03 | 0.04  | 1 | 0.51     | 0.18     | 0.24     | NA | NA | NA | NA |
| 0     | 0     | -0.11 | NA    | 1 | 1        | 0.69     | NA       | NA | NA | NA | NA |
| 0     | 0.05  | -0.09 | -0.02 | 1 | 0.31     | 0.00068  | 0.57     | NA | NA | NA | NA |
| 0.01  | -0.08 | -0.13 | -0.06 | 1 | 0.22     | 5.90E-07 | 0.038    | NA | NA | NA | NA |
| -0.01 | -0.02 | -0.1  | -0.01 | 1 | 1        | 0.029    | 0.88     | NA | NA | NA | NA |

|       |       |       |       |    |         |          |          |    |    |    |    |
|-------|-------|-------|-------|----|---------|----------|----------|----|----|----|----|
| -0.03 | 0.06  | -0.14 | -0.07 | 1  | 0.81    | 5.60E-05 | 0.026    | NA | NA | NA | NA |
| -0.01 | -0.04 | -0.01 | 0     | 1  | 1       | 0.86     | 0.98     | NA | NA | NA | NA |
| -0.01 | -0.06 | 0.03  | -0.06 | 1  | 0.93    | 0.61     | 0.18     | NA | NA | NA | NA |
| 0.15  | NA    | 0.03  | -0.02 | 1  | NA      | 0.18     | 0.35     | NA | NA | NA | NA |
| 0     | 0.26  | -0.02 | 0.05  | 1  | 0.016   | 0.63     | 0.12     | NA | NA | NA | NA |
| 0     | 0     | 0.05  | 0.04  | 1  | 1       | 0.029    | 0.046    | NA | NA | NA | NA |
| 0     | 0     | -0.03 | 0.02  | 1  | 1       | 0.19     | 0.55     | NA | NA | NA | NA |
| 0.02  | 0.06  | 0.02  | 0.02  | 1  | 0.61    | 0.75     | 0.68     | NA | NA | NA | NA |
| -0.02 | 0.07  | 0.06  | 0.04  | 1  | 0.67    | 0.038    | 0.16     | NA | NA | NA | NA |
| 0     | 0.01  | -0.03 | -0.01 | 1  | 0.84    | 0.013    | 0.36     | NA | NA | NA | NA |
| NA    | 0     | 0.04  | 0.14  | NA | 1       | 1        | 0.47     | NA | NA | NA | NA |
| NA    | NA    | -0.07 | 0.18  | NA | NA      | 0.3      | 0.055    | NA | NA | NA | NA |
| NA    | NA    | NA    | NA    | NA | NA      | NA       | NA       | NA | NA | NA | NA |
| NA    | NA    | -0.15 | -0.05 | NA | NA      | 0.14     | 1        | NA | NA | NA | NA |
| NA    | NA    | -0.22 | 0.07  | NA | NA      | 0.51     | 1        | NA | NA | NA | NA |
| NA    | NA    | NA    | NA    | NA | NA      | NA       | NA       | NA | NA | NA | NA |
| NA    | 0     | 0.67  | NA    | NA | 1       | 1        | NA       | NA | NA | NA | NA |
| NA    | NA    | 0.02  | NA    | NA | NA      | 0.8      | NA       | NA | NA | NA | NA |
| NA    | 0.03  | -0.01 | 0.23  | NA | 1       | 0.92     | 2.30E-08 | NA | NA | NA | NA |
| NA    | 0.1   | -0.1  | -0.05 | NA | 0.23    | 1.50E-06 | 0.02     | NA | NA | NA | NA |
| NA    | 0.39  | -0.08 | 0.1   | NA | 0.00021 | 0.0054   | 0.06     | NA | NA | NA | NA |
| NA    | -0.25 | -0.05 | 0     | NA | 0.49    | 0.62     | 1        | NA | NA | NA | NA |
| NA    | NA    | -0.03 | -0.02 | NA | NA      | 0.45     | 0.73     | NA | NA | NA | NA |
| NA    | NA    | 0.03  | NA    | NA | NA      | 1        | NA       | NA | NA | NA | NA |
| NA    | NA    | 0.06  | NA    | NA | NA      | 0.84     | NA       | NA | NA | NA | NA |
| NA    | 0.12  | -0.07 | -0.02 | NA | 0.17    | 0.0044   | 0.51     | NA | NA | NA | NA |
| NA    | -0.08 | 0.52  | -0.31 | NA | 0.99    | 0.084    | 0.00021  | NA | NA | NA | NA |
| NA    | NA    | 0.03  | 0.08  | NA | NA      | 1        | 1        | NA | NA | NA | NA |
| NA    | -0.79 | -0.1  | 0.21  | NA | 0.089   | 0.0082   | 3.10E-06 | NA | NA | NA | NA |
| NA    | 0.06  | -0.02 | -0.06 | NA | 0.8     | 1        | 0.26     | NA | NA | NA | NA |

|    |       |       |       |    |       |          |        |    |    |    |    |
|----|-------|-------|-------|----|-------|----------|--------|----|----|----|----|
| NA | 0.5   | NA    | 0.4   | NA | 0.32  | NA       | 0.44   | NA | NA | NA | NA |
| NA | NA    | 0     | 0     | NA | NA    | 1        | 1      | NA | NA | NA | NA |
| NA | NA    | -0.02 | 0.03  | NA | NA    | 0.54     | 0.5    | NA | NA | NA | NA |
| NA | NA    | -0.06 | NA    | NA | NA    | 0.41     | NA     | NA | NA | NA | NA |
| NA | NA    | NA    | NA    | NA | NA    | NA       | NA     | NA | NA | NA | NA |
| NA | 0.05  | -0.03 | -0.01 | NA | 1     | 0.61     | 0.83   | NA | NA | NA | NA |
| NA | NA    | NA    | NA    | NA | NA    | NA       | NA     | NA | NA | NA | NA |
| NA | 0.01  | -0.15 | -0.08 | NA | 1     | 0.13     | 0.58   | NA | NA | NA | NA |
| NA | NA    | NA    | NA    | NA | NA    | NA       | NA     | NA | NA | NA | NA |
| NA | 0.9   | -0.02 | -0.04 | NA | 0.011 | 0.99     | 0.48   | NA | NA | NA | NA |
| NA | NA    | NA    | -0.14 | NA | NA    | NA       | 0.6    | NA | NA | NA | NA |
| NA | NA    | 0.18  | 0.41  | NA | NA    | 0.19     | 0.035  | NA | NA | NA | NA |
| NA | 0.92  | 0     | -0.04 | NA | 0.15  | 1        | 0.44   | NA | NA | NA | NA |
| NA | -0.02 | NA    | -0.04 | NA | 1     | NA       | 0.65   | NA | NA | NA | NA |
| NA | 0.01  | 0.06  | 0     | NA | 1     | 0.58     | 1      | NA | NA | NA | NA |
| NA | NA    | -0.11 | -0.07 | NA | NA    | 1.50E-05 | 0.029  | NA | NA | NA | NA |
| NA | NA    | 0.75  | NA    | NA | NA    | 0.63     | NA     | NA | NA | NA | NA |
| NA | NA    | 0.06  | 0.12  | NA | NA    | 0.11     | 0.0024 | NA | NA | NA | NA |
| NA | 0.12  | -0.18 | -0.13 | NA | 0.39  | 0.11     | 0.42   | NA | NA | NA | NA |
| NA | -0.3  | -0.07 | 0.03  | NA | 0.64  | 0.0084   | 0.54   | NA | NA | NA | NA |
| NA | NA    | 0     | 0.02  | NA | NA    | 1        | 1      | NA | NA | NA | NA |
| NA | -0.05 | -0.07 | -0.05 | NA | 0.92  | 0.085    | 0.35   | NA | NA | NA | NA |
| NA | NA    | 0.05  | 0.81  | NA | NA    | 0.64     | 0.46   | NA | NA | NA | NA |
| NA | NA    | -0.28 | -0.1  | NA | NA    | 0.41     | 0.84   | NA | NA | NA | NA |
| NA | NA    | NA    | NA    | NA | NA    | NA       | NA     | NA | NA | NA | NA |
| NA | NA    | NA    | NA    | NA | NA    | NA       | NA     | NA | NA | NA | NA |
| NA | NA    | 0.05  | 0.71  | NA | NA    | 1        | 0.78   | NA | NA | NA | NA |
| NA | NA    | NA    | NA    | NA | NA    | NA       | NA     | NA | NA | NA | NA |
| NA | NA    | NA    | NA    | NA | NA    | NA       | NA     | NA | NA | NA | NA |
| NA | -0.05 | 0.01  | 0.05  | NA | 1     | 0.94     | 0.24   | NA | NA | NA | NA |

|    |       |       |       |    |          |       |         |    |    |    |    |
|----|-------|-------|-------|----|----------|-------|---------|----|----|----|----|
| NA | -0.01 | -0.08 | -0.07 | NA | 1        | 0.023 | 0.022   | NA | NA | NA | NA |
| NA | -0.15 | 0.02  | 0.05  | NA | 0.96     | 0.72  | 0.3     | NA | NA | NA | NA |
| NA | 0.25  | 0     | 0.07  | NA | 0.7      | 1     | 0.37    | NA | NA | NA | NA |
| NA | 0.19  | -0.01 | 0.05  | NA | 0.18     | 0.95  | 0.034   | NA | NA | NA | NA |
| NA | NA    | NA    | NA    | NA | NA       | NA    | NA      | NA | NA | NA | NA |
| NA | NA    | NA    | NA    | NA | NA       | NA    | NA      | NA | NA | NA | NA |
| NA | NA    | -0.04 | 0.14  | NA | NA       | 0.12  | 0.00065 | NA | NA | NA | NA |
| NA | NA    | -0.1  | 0.04  | NA | NA       | 0.022 | 1       | NA | NA | NA | NA |
| NA | NA    | -0.03 | -0.02 | NA | NA       | 0.92  | 0.97    | NA | NA | NA | NA |
| NA | NA    | -0.12 | 0.08  | NA | NA       | 0.82  | 1       | NA | NA | NA | NA |
| NA | 0.45  | -0.18 | 0.05  | NA | 0.048    | 0.24  | 1       | NA | NA | NA | NA |
| NA | 0.32  | -0.01 | -0.01 | NA | 0.004    | 0.84  | 0.98    | NA | NA | NA | NA |
| NA | -0.05 | -0.04 | 0.88  | NA | 1        | 0.34  | 0.0093  | NA | NA | NA | NA |
| NA | 0.02  | 0.02  | 0.1   | NA | 1        | 0.91  | 0.067   | NA | NA | NA | NA |
| NA | 0.08  | -0.07 | 0.02  | NA | 0.053    | 0.025 | 0.51    | NA | NA | NA | NA |
| NA | NA    | 0.01  | NA    | NA | NA       | 1     | NA      | NA | NA | NA | NA |
| NA | NA    | -0.15 | NA    | NA | NA       | 0.48  | NA      | NA | NA | NA | NA |
| NA | NA    | 0.22  | NA    | NA | NA       | 0.75  | NA      | NA | NA | NA | NA |
| NA | 0.03  | -0.1  | 0.27  | NA | 1        | 0.01  | 0.00011 | NA | NA | NA | NA |
| NA | NA    | NA    | 0     | NA | NA       | NA    | 1       | NA | NA | NA | NA |
| NA | NA    | -0.01 | 0.15  | NA | NA       | 0.94  | 0.0075  | NA | NA | NA | NA |
| NA | 0.04  | -0.12 | 0.06  | NA | 1        | 0.048 | 0.62    | NA | NA | NA | NA |
| NA | 0.34  | 0.06  | 0.02  | NA | 1.10E-06 | 0.45  | 1       | NA | NA | NA | NA |
| NA | NA    | -0.02 | 0.14  | NA | NA       | 1     | 0.47    | NA | NA | NA | NA |
| NA | NA    | NA    | NA    | NA | NA       | NA    | NA      | NA | NA | NA | NA |
| NA | 0.06  | -0.01 | 0.05  | NA | 0.12     | 0.87  | 0.3     | NA | NA | NA | NA |
| NA | NA    | -0.05 | -0.02 | NA | NA       | 0.21  | 0.76    | NA | NA | NA | NA |
| NA | NA    | -0.17 | 0.15  | NA | NA       | 0.094 | 1       | NA | NA | NA | NA |
| NA | NA    | -0.08 | NA    | NA | NA       | 1     | NA      | NA | NA | NA | NA |
| NA | NA    | -0.79 | -0.82 | NA | NA       | 0.55  | 0.55    | NA | NA | NA | NA |





|      |       |       |       |          |          |          |         |    |    |    |    |
|------|-------|-------|-------|----------|----------|----------|---------|----|----|----|----|
| NA   | NA    | -0.05 | NA    | NA       | NA       | 0.41     | NA      | NA | NA | NA | NA |
| NA   | -0.05 | -0.06 | -0.08 | NA       | 0.32     | 0.14     | 0.014   | NA | NA | NA | NA |
| NA   | NA    | -0.27 | -0.17 | NA       | NA       | 0.00034  | 0.49    | NA | NA | NA | NA |
| NA   | NA    | -0.15 | 0.08  | NA       | NA       | 0.0021   | 0.64    | NA | NA | NA | NA |
| NA   | -0.09 | -0.09 | -0.06 | NA       | 1        | 0.0049   | 0.14    | NA | NA | NA | NA |
| 0.33 | 0.03  | -0.06 | -0.06 | 1.00E-09 | 0.43     | 0.094    | 0.076   | NA | NA | NA | NA |
| 0.29 | 0.06  | -0.03 | 0.07  | 1.80E-08 | 0.042    | 0.035    | 0.00038 | NA | NA | NA | NA |
| 0.47 | 0.02  | -0.01 | 0.03  | 4.00E-08 | 0.81     | 0.82     | 0.28    | NA | NA | NA | NA |
| 0.22 | -0.02 | -0.02 | 0.04  | 1.10E-07 | 0.15     | 0.27     | 0.02    | NA | NA | NA | NA |
| 0.2  | 0.05  | -0.03 | 0.01  | 5.80E-07 | 0.0073   | 0.11     | 0.67    | NA | NA | NA | NA |
| 0.21 | 0.16  | -0.05 | 0.03  | 9.50E-07 | 2.40E-07 | 0.019    | 0.26    | NA | NA | NA | NA |
| 0.17 | 0.07  | -0.05 | -0.03 | 1.00E-06 | 0.014    | 0.0033   | 0.1     | NA | NA | NA | NA |
| 0.14 | 0.08  | -0.03 | 0.06  | 1.50E-06 | 2.10E-05 | 0.025    | 0.00019 | NA | NA | NA | NA |
| 0.2  | 0.15  | -0.02 | 0.05  | 3.70E-06 | 1.30E-05 | 0.14     | 0.0025  | NA | NA | NA | NA |
| 0.24 | 0.02  | -0.03 | 0.05  | 1.30E-05 | 0.79     | 0.31     | 0.13    | NA | NA | NA | NA |
| 0.15 | 0.07  | -0.03 | -0.02 | 1.40E-05 | 9.60E-05 | 0.088    | 0.41    | NA | NA | NA | NA |
| 0.08 | 0.09  | -0.07 | -0.01 | 1.70E-05 | 2.90E-05 | 9.60E-09 | 0.39    | NA | NA | NA | NA |
| 0.1  | 0.01  | -0.02 | 0.04  | 2.00E-05 | 0.77     | 0.1      | 0.022   | NA | NA | NA | NA |
| 0.08 | 0.06  | 0.02  | -0.01 | 3.20E-05 | 0.00018  | 0.2      | 0.71    | NA | NA | NA | NA |
| 0.13 | 0.05  | -0.06 | -0.02 | 5.00E-05 | 0.051    | 0.0035   | 0.37    | NA | NA | NA | NA |
| 0.42 | 0.09  | 0     | 0.02  | 6.40E-05 | 0.012    | 0.95     | 0.54    | NA | NA | NA | NA |
| 0.12 | 0.1   | 0     | 0.05  | 7.30E-05 | 0.0017   | 0.94     | 0.0032  | NA | NA | NA | NA |
| 0.3  | 0.21  | 0     | 0.05  | 0.00011  | 4.80E-06 | 0.93     | 0.049   | NA | NA | NA | NA |
| 0.35 | 0.01  | -0.03 | 0.04  | 0.00013  | 1        | 0.1      | 0.029   | NA | NA | NA | NA |
| 0.09 | 0.05  | -0.03 | 0     | 0.00014  | 0.0038   | 0.0018   | 0.69    | NA | NA | NA | NA |
| 0.59 | 0.18  | -0.03 | 0.07  | 0.00015  | 0.023    | 0.31     | 0.057   | NA | NA | NA | NA |
| 0.25 | 0.01  | -0.01 | -0.03 | 0.00017  | 1        | 0.92     | 0.42    | NA | NA | NA | NA |
| 0.26 | 0.37  | -0.04 | 0.11  | 0.00018  | 3.00E-07 | 0.41     | 0.00027 | NA | NA | NA | NA |
| 0.18 | 0.06  | -0.03 | 0     | 0.00019  | 0.11     | 0.19     | 1       | NA | NA | NA | NA |
| 0.15 | 0.02  | -0.07 | 0.05  | 0.00026  | 0.44     | 2.40E-05 | 0.024   | NA | NA | NA | NA |

|       |       |       |       |          |          |          |          |    |    |    |    |
|-------|-------|-------|-------|----------|----------|----------|----------|----|----|----|----|
| 0.17  | 0.12  | -0.1  | -0.09 | 0.00028  | 0.0022   | 5.00E-06 | 1.80E-05 | NA | NA | NA | NA |
| -0.11 | -0.1  | 0.01  | 0.1   | 3.00E-04 | 2.00E-04 | 0.85     | 3.80E-05 | NA | NA | NA | NA |
| -0.27 | -0.18 | -0.07 | -0.05 | 0.00037  | 0.032    | 0.0057   | 0.018    | NA | NA | NA | NA |
| 0.11  | 0.22  | 0     | 0.03  | 0.00038  | 6.60E-07 | 0.98     | 0.04     | NA | NA | NA | NA |
| 0.16  | 0.18  | -0.04 | 0.03  | 0.00038  | 3.50E-08 | 0.00067  | 0.068    | NA | NA | NA | NA |
| 0.95  | 0.2   | -0.24 | NA    | 0.00046  | 0.24     | 0.063    | NA       | NA | NA | NA | NA |
| 0.1   | 0.25  | -0.01 | 0.04  | 0.001    | 2.70E-09 | 0.61     | 0.00096  | NA | NA | NA | NA |
| 0.12  | 0.02  | -0.01 | -0.02 | 0.0011   | 0.35     | 0.86     | 0.46     | NA | NA | NA | NA |
| 0.06  | 0.05  | 0.01  | 0.02  | 0.0011   | 0.0013   | 0.27     | 0.069    | NA | NA | NA | NA |
| 0.2   | -0.01 | -0.03 | -0.01 | 0.0012   | 0.75     | 0.066    | 0.46     | NA | NA | NA | NA |
| -0.11 | 0.07  | -0.04 | 0.03  | 0.0015   | 0.24     | 0.11     | 0.2      | NA | NA | NA | NA |
| 0.08  | 0.09  | -0.04 | 0     | 0.0024   | 0.0014   | 0.042    | 0.97     | NA | NA | NA | NA |
| 0.11  | 0.2   | -0.04 | 0     | 0.0025   | 2.60E-06 | 0.0025   | 0.86     | NA | NA | NA | NA |
| 0.07  | 0.07  | 0     | 0.06  | 0.0025   | 0.00045  | 1        | 1.60E-06 | NA | NA | NA | NA |
| 0.06  | 0.11  | -0.06 | -0.02 | 0.0027   | 1.00E-08 | 2.40E-06 | 0.17     | NA | NA | NA | NA |
| -0.09 | -0.05 | -0.1  | -0.05 | 0.0028   | 0.089    | 1.90E-07 | 0.036    | NA | NA | NA | NA |
| 0.16  | 0.15  | -0.14 | -0.09 | 0.0031   | 3.00E-04 | 1.10E-07 | 0.005    | NA | NA | NA | NA |
| 0.21  | -0.01 | 0.04  | 0.05  | 0.0031   | 1        | 0.25     | 0.094    | NA | NA | NA | NA |
| 0.34  | 0     | -0.06 | -0.03 | 0.0033   | 1        | 0.02     | 0.47     | NA | NA | NA | NA |
| 0.22  | 0.01  | -0.03 | 0.06  | 0.0033   | 0.98     | 0.38     | 0.037    | NA | NA | NA | NA |
| 0.11  | 0     | -0.05 | -0.04 | 0.0033   | 1        | 0.00035  | 0.0088   | NA | NA | NA | NA |
| 0.16  | -0.06 | -0.06 | 0     | 0.0041   | 0.043    | 0.00055  | 0.99     | NA | NA | NA | NA |
| 0.14  | 0.11  | -0.01 | -0.04 | 0.0045   | 0.093    | 0.71     | 0.18     | NA | NA | NA | NA |
| 0.18  | 0.3   | 0.14  | 0.2   | 0.0048   | 1.80E-06 | 0.00046  | 1.40E-05 | NA | NA | NA | NA |
| 0.34  | 0.05  | -0.02 | 0.13  | 0.0053   | 0.49     | 0.47     | 0.00021  | NA | NA | NA | NA |
| 0.41  | -0.39 | -0.13 | -0.08 | 0.0059   | 1.50E-06 | 0.00021  | 0.068    | NA | NA | NA | NA |
| 0.13  | 0.03  | -0.07 | 0.03  | 0.007    | 0.29     | 1.50E-05 | 0.21     | NA | NA | NA | NA |
| 0.07  | -0.07 | -0.05 | -0.07 | 0.0072   | 0.0051   | 0.008    | 0.00022  | NA | NA | NA | NA |
| 0.16  | 0     | -0.01 | 0.05  | 0.0072   | 1        | 0.93     | 0.084    | NA | NA | NA | NA |
| 0.18  | -0.1  | -0.01 | 0.02  | 0.0084   | 0.056    | 0.62     | 0.3      | NA | NA | NA | NA |

|       |       |       |       |        |          |          |          |    |    |    |    |
|-------|-------|-------|-------|--------|----------|----------|----------|----|----|----|----|
| 0.07  | 0.03  | -0.02 | 0.03  | 0.009  | 0.21     | 0.08     | 0.02     | NA | NA | NA | NA |
| 0.2   | 0.01  | -0.03 | 0.03  | 0.0095 | 0.99     | 0.25     | 0.4      | NA | NA | NA | NA |
| -0.63 | -0.58 | 0.35  | 0.24  | 0.0099 | 0.021    | 0.0015   | 0.011    | NA | NA | NA | NA |
| 0.08  | -0.01 | -0.07 | 0     | 0.012  | 0.51     | 1.00E-06 | 0.96     | NA | NA | NA | NA |
| 0.06  | 0.06  | 0     | 0.04  | 0.012  | 0.0047   | 0.87     | 0.002    | NA | NA | NA | NA |
| 0.07  | 0.03  | -0.03 | 0.03  | 0.013  | 0.14     | 0.12     | 0.17     | NA | NA | NA | NA |
| 0.16  | -0.01 | 0.04  | 0.09  | 0.013  | 0.97     | 0.18     | 0.00081  | NA | NA | NA | NA |
| 0.06  | 0.08  | 0.01  | 0.04  | 0.014  | 9.90E-05 | 0.76     | 0.0028   | NA | NA | NA | NA |
| 0.44  | 0.29  | -0.03 | 0.03  | 0.015  | 0.061    | 0.53     | 0.43     | NA | NA | NA | NA |
| 0.33  | 0.32  | 0.06  | 0.02  | 0.015  | 0.0015   | 0.16     | 0.73     | NA | NA | NA | NA |
| -0.1  | 0.11  | -0.04 | 0     | 0.015  | 0.034    | 0.15     | 0.95     | NA | NA | NA | NA |
| 0.11  | 0.05  | -0.01 | 0.04  | 0.015  | 0.2      | 0.75     | 0.059    | NA | NA | NA | NA |
| 0.09  | 0.18  | -0.01 | -0.01 | 0.016  | 6.10E-07 | 0.49     | 0.69     | NA | NA | NA | NA |
| -0.08 | -0.11 | -0.01 | 0.01  | 0.016  | 0.00069  | 0.52     | 0.51     | NA | NA | NA | NA |
| 0.14  | 0.09  | -0.01 | -0.01 | 0.018  | 0.072    | 0.98     | 0.97     | NA | NA | NA | NA |
| 0.04  | 0.02  | -0.01 | 0     | 0.019  | 0.2      | 0.23     | 0.73     | NA | NA | NA | NA |
| 0.75  | 0.75  | -0.02 | 0.3   | 0.02   | 0.0019   | 1        | 0.022    | NA | NA | NA | NA |
| 0.03  | 0.07  | 0.01  | 0.03  | 0.021  | 6.00E-04 | 0.42     | 0.011    | NA | NA | NA | NA |
| 0.09  | 0.13  | -0.05 | 0.03  | 0.021  | 0.00079  | 0.0041   | 0.25     | NA | NA | NA | NA |
| -0.1  | -0.01 | -0.04 | 0.03  | 0.021  | 0.99     | 0.026    | 0.12     | NA | NA | NA | NA |
| 0.11  | 0.02  | -0.05 | -0.02 | 0.022  | 0.48     | 0.088    | 0.51     | NA | NA | NA | NA |
| -0.12 | -0.12 | -0.1  | -0.1  | 0.023  | 0.022    | 4.90E-07 | 3.90E-06 | NA | NA | NA | NA |
| 0.55  | 0.72  | 0.35  | NA    | 0.025  | 0.0062   | 0.24     | NA       | NA | NA | NA | NA |
| 0.1   | 0.04  | 0.04  | -0.04 | 0.027  | 0.2      | 0.2      | 0.016    | NA | NA | NA | NA |
| -0.1  | -0.04 | 0.05  | 0.03  | 0.027  | 0.41     | 0.042    | 0.2      | NA | NA | NA | NA |
| -0.06 | 0.01  | -0.03 | 0     | 0.029  | 0.86     | 0.018    | 0.76     | NA | NA | NA | NA |
| 0.15  | 0.05  | -0.05 | 0.04  | 0.036  | 0.37     | 0.16     | 0.18     | NA | NA | NA | NA |
| 0.11  | 0.17  | -0.04 | -0.02 | 0.041  | 9.80E-06 | 0.028    | 0.27     | NA | NA | NA | NA |
| 0.15  | 0.1   | -0.09 | -0.08 | 0.042  | 0.021    | 0.0044   | 0.0039   | NA | NA | NA | NA |
| 0.15  | 0.07  | -0.07 | -0.01 | 0.044  | 0.031    | 0.0018   | 0.81     | NA | NA | NA | NA |

|       |       |       |       |       |          |          |         |    |    |    |    |
|-------|-------|-------|-------|-------|----------|----------|---------|----|----|----|----|
| 0.04  | 0.04  | -0.03 | 0     | 0.05  | 0.022    | 0.0079   | 1       | NA | NA | NA | NA |
| 0.04  | 0.02  | -0.01 | -0.01 | 0.05  | 0.13     | 0.19     | 0.24    | NA | NA | NA | NA |
| 0.04  | -0.01 | -0.01 | 0.05  | 0.051 | 0.73     | 0.42     | 0.00034 | NA | NA | NA | NA |
| 0.03  | 0.05  | -0.03 | 0.02  | 0.053 | 0.0057   | 0.0037   | 0.062   | NA | NA | NA | NA |
| 0.85  | 0.85  | 0.56  | 0     | 0.055 | 3.60E-05 | 0.25     | 1       | NA | NA | NA | NA |
| 0.14  | -0.01 | -0.02 | -0.01 | 0.055 | 0.81     | 0.24     | 0.44    | NA | NA | NA | NA |
| 0.29  | 0.04  | -0.05 | -0.08 | 0.057 | 0.47     | 0.22     | 0.043   | NA | NA | NA | NA |
| 0.1   | 0.03  | -0.06 | 0     | 0.057 | 0.53     | 0.0023   | 1       | NA | NA | NA | NA |
| 0.3   | 0.62  | -0.08 | 0.05  | 0.059 | 1.60E-09 | 0.024    | 0.23    | NA | NA | NA | NA |
| -0.08 | 0.13  | -0.1  | -0.04 | 0.06  | 0.016    | 5.80E-05 | 0.15    | NA | NA | NA | NA |
| 0.48  | 0.27  | 0.04  | -0.03 | 0.061 | 0.27     | 0.41     | 0.67    | NA | NA | NA | NA |
| 0.38  | 0.08  | -0.02 | -0.03 | 0.061 | 0.37     | 0.5      | 0.37    | NA | NA | NA | NA |
| 0.24  | 0     | 0.06  | 0.07  | 0.063 | 1        | 0.11     | 0.076   | NA | NA | NA | NA |
| -0.05 | 0.02  | -0.08 | 0.01  | 0.063 | 0.51     | 0.00018  | 0.59    | NA | NA | NA | NA |
| 0.04  | 0.04  | -0.09 | -0.06 | 0.068 | 0.15     | 1.20E-05 | 0.0023  | NA | NA | NA | NA |
| 0.06  | 0.02  | -0.05 | -0.03 | 0.074 | 0.59     | 0.023    | 0.21    | NA | NA | NA | NA |
| 0.13  | 0.05  | -0.09 | -0.01 | 0.079 | 0.29     | 1.60E-07 | 0.77    | NA | NA | NA | NA |
| 0.47  | -0.1  | 0.06  | -0.01 | 0.08  | 0.86     | 0.43     | 1       | NA | NA | NA | NA |
| 0.08  | -0.02 | -0.01 | -0.01 | 0.08  | 0.73     | 0.61     | 0.45    | NA | NA | NA | NA |
| 0.09  | -0.02 | -0.03 | 0.01  | 0.08  | 0.64     | 0.092    | 0.59    | NA | NA | NA | NA |
| 0.18  | 0.18  | -0.07 | -0.01 | 0.081 | 0.036    | 0.0046   | 0.94    | NA | NA | NA | NA |
| 0.05  | 0.07  | -0.04 | 0     | 0.084 | 0.013    | 0.076    | 0.86    | NA | NA | NA | NA |
| 0.15  | 0.31  | 0.05  | -0.01 | 0.085 | 1.00E-07 | 0.084    | 0.63    | NA | NA | NA | NA |
| -0.12 | -0.08 | -0.1  | -0.05 | 0.085 | 0.27     | 0.0037   | 0.23    | NA | NA | NA | NA |
| -0.05 | -0.03 | -0.06 | -0.03 | 0.091 | 0.34     | 0.00012  | 0.16    | NA | NA | NA | NA |
| -0.1  | -0.19 | 0.05  | 0.04  | 0.093 | 0.00092  | 0.0053   | 0.069   | NA | NA | NA | NA |
| 0.08  | -0.01 | 0     | 0.02  | 0.096 | 0.91     | 1        | 0.61    | NA | NA | NA | NA |
| -0.07 | 0.03  | -0.03 | 0     | 0.096 | 0.8      | 0.21     | 0.92    | NA | NA | NA | NA |
| 0.13  | -0.06 | 0     | 0.09  | 0.097 | 1        | 0.98     | 0.0077  | NA | NA | NA | NA |
| 0.15  | -0.04 | -0.02 | 0.03  | 0.1   | 0.5      | 0.56     | 0.16    | NA | NA | NA | NA |

|       |       |       |       |      |          |          |          |    |    |    |    |
|-------|-------|-------|-------|------|----------|----------|----------|----|----|----|----|
| 0.04  | -0.04 | -0.05 | 0     | 0.1  | 0.05     | 1.90E-06 | 1        | NA | NA | NA | NA |
| 0.07  | -0.05 | -0.03 | 0.01  | 0.1  | 0.11     | 0.021    | 0.45     | NA | NA | NA | NA |
| 0.16  | 0.17  | -0.01 | -0.02 | 0.1  | 0.045    | 0.8      | 0.74     | NA | NA | NA | NA |
| 0.12  | 0.14  | -0.02 | -0.01 | 0.1  | 0.047    | 0.29     | 0.59     | NA | NA | NA | NA |
| 0.07  | 0.04  | 0.01  | 0.02  | 0.11 | 0.16     | 0.75     | 0.34     | NA | NA | NA | NA |
| -0.03 | 0     | -0.02 | 0.01  | 0.11 | 0.98     | 0.13     | 0.67     | NA | NA | NA | NA |
| -0.01 | 0.05  | -0.06 | -0.01 | 0.12 | 2.60E-07 | 0.00039  | 0.76     | NA | NA | NA | NA |
| -0.17 | -0.26 | -0.03 | 0.1   | 0.12 | 0.00094  | 0.091    | 0.00071  | NA | NA | NA | NA |
| 0.05  | 0.05  | 0     | 0.07  | 0.12 | 0.095    | 0.93     | 3.50E-06 | NA | NA | NA | NA |
| 0.04  | 0.02  | -0.03 | 0.06  | 0.12 | 0.44     | 0.047    | 8.60E-05 | NA | NA | NA | NA |
| 0.1   | -0.01 | -0.03 | 0.08  | 0.12 | 1        | 0.15     | 0.022    | NA | NA | NA | NA |
| -0.07 | -0.02 | -0.05 | 0     | 0.12 | 0.82     | 0.00015  | 0.96     | NA | NA | NA | NA |
| 0.09  | 0.17  | 0.02  | 0.07  | 0.13 | 0.0016   | 0.56     | 0.0037   | NA | NA | NA | NA |
| -0.06 | 0.02  | -0.04 | 0     | 0.13 | 0.9      | 0.019    | 0.87     | NA | NA | NA | NA |
| 0.05  | -0.04 | -0.05 | -0.02 | 0.14 | 0.066    | 7.00E-04 | 0.3      | NA | NA | NA | NA |
| 0.07  | 0.01  | 0.03  | 0.03  | 0.14 | 0.83     | 0.22     | 0.23     | NA | NA | NA | NA |
| 0.03  | 0.06  | -0.01 | 0.01  | 0.15 | 0.0038   | 0.35     | 0.68     | NA | NA | NA | NA |
| -0.07 | 0.03  | 0.02  | 0.12  | 0.15 | 0.7      | 0.37     | 3.30E-06 | NA | NA | NA | NA |
| 0.2   | 0.56  | -0.01 | 0.05  | 0.16 | 0.00022  | 0.87     | 0.13     | NA | NA | NA | NA |
| 0.1   | 0.14  | -0.03 | -0.01 | 0.16 | 9.40E-05 | 0.19     | 0.84     | NA | NA | NA | NA |
| 0.02  | 0.02  | -0.02 | 0     | 0.17 | 0.13     | 0.054    | 0.75     | NA | NA | NA | NA |
| 0.04  | 0.02  | 0.01  | 0     | 0.18 | 0.55     | 0.52     | 1        | NA | NA | NA | NA |
| 0.13  | 0.16  | -0.01 | -0.02 | 0.18 | 0.022    | 0.91     | 0.69     | NA | NA | NA | NA |
| 0.13  | 0.1   | -0.02 | 0.02  | 0.18 | 0.1      | 0.68     | 0.75     | NA | NA | NA | NA |
| -0.07 | 0.12  | -0.05 | 0.06  | 0.19 | 0.095    | 0.0037   | 0.0077   | NA | NA | NA | NA |
| -0.12 | -0.03 | 0     | 0.05  | 0.19 | 0.86     | 0.97     | 0.12     | NA | NA | NA | NA |
| 0.06  | -0.03 | -0.02 | -0.01 | 0.19 | 0.33     | 0.26     | 0.4      | NA | NA | NA | NA |
| 0.2   | 0.24  | -0.05 | -0.08 | 0.19 | 0.45     | 0.19     | 0.36     | NA | NA | NA | NA |
| -0.04 | -0.04 | -0.07 | -0.04 | 0.2  | 0.4      | 4.40E-07 | 0.0091   | NA | NA | NA | NA |
| 0.09  | 0.51  | 0.01  | 0.07  | 0.2  | 0.0023   | 0.79     | 0.028    | NA | NA | NA | NA |

|       |       |       |       |      |          |         |         |    |    |    |    |
|-------|-------|-------|-------|------|----------|---------|---------|----|----|----|----|
| 0.11  | 0.06  | -0.05 | -0.01 | 0.2  | 0.68     | 0.56    | 1       | NA | NA | NA | NA |
| 0.37  | 0.18  | -0.12 | -0.01 | 0.21 | 0.11     | 0.0048  | 0.94    | NA | NA | NA | NA |
| 0.09  | 0.15  | -0.1  | -0.13 | 0.21 | 0.043    | 0.049   | 0.0012  | NA | NA | NA | NA |
| 0.03  | 0.08  | -0.06 | -0.02 | 0.22 | 0.0044   | 0.00017 | 0.3     | NA | NA | NA | NA |
| 0.04  | 0.04  | -0.05 | 0.07  | 0.22 | 0.18     | 0.07    | 0.015   | NA | NA | NA | NA |
| 0.16  | 0.03  | -0.1  | -0.09 | 0.22 | 0.83     | 0.015   | 0.064   | NA | NA | NA | NA |
| 0.03  | 0.02  | -0.05 | -0.01 | 0.22 | 0.3      | 0.00013 | 0.46    | NA | NA | NA | NA |
| 0.13  | 0.09  | -0.06 | -0.01 | 0.23 | 0.14     | 0.0032  | 0.64    | NA | NA | NA | NA |
| 0.12  | 0.02  | -0.06 | -0.01 | 0.23 | 0.83     | 0.11    | 1       | NA | NA | NA | NA |
| 0.23  | NA    | 0.03  | 0.07  | 0.23 | NA       | 0.82    | 0.41    | NA | NA | NA | NA |
| 0.06  | 0.1   | -0.05 | -0.01 | 0.23 | 0.087    | 0.011   | 0.83    | NA | NA | NA | NA |
| 0.09  | 0.02  | -0.02 | -0.01 | 0.24 | 0.93     | 1       | 1       | NA | NA | NA | NA |
| 0.08  | 0.22  | -0.13 | -0.06 | 0.24 | 0.0022   | 0.0054  | 0.21    | NA | NA | NA | NA |
| 0.06  | 0.09  | 0.01  | 0.05  | 0.24 | 0.41     | 0.85    | 0.066   | NA | NA | NA | NA |
| 0.03  | 0.01  | -0.01 | 0.01  | 0.25 | 0.82     | 0.63    | 0.59    | NA | NA | NA | NA |
| 0.07  | 0.05  | -0.04 | 0.07  | 0.25 | 0.43     | 0.094   | 0.03    | NA | NA | NA | NA |
| 0.06  | 0.13  | -0.04 | 0.06  | 0.25 | 0.01     | 0.11    | 0.033   | NA | NA | NA | NA |
| -0.16 | 0.03  | -0.02 | 0.1   | 0.27 | 1        | 1       | 0.88    | NA | NA | NA | NA |
| 0.03  | 0.03  | 0     | 0.04  | 0.27 | 0.28     | 0.88    | 0.0047  | NA | NA | NA | NA |
| 0.08  | 0.02  | -0.04 | 0     | 0.28 | 0.68     | 0.2     | 0.98    | NA | NA | NA | NA |
| 0.06  | 0.04  | -0.06 | 0     | 0.28 | 0.54     | 0.08    | 1       | NA | NA | NA | NA |
| 0.03  | 0.09  | -0.05 | 0.01  | 0.28 | 7.00E-04 | 0.045   | 0.79    | NA | NA | NA | NA |
| 0.87  | -0.01 | -0.05 | 0.09  | 0.28 | 0.94     | 0.0063  | 0.0016  | NA | NA | NA | NA |
| 0.06  | 0.01  | -0.01 | 0.03  | 0.29 | 1        | 0.89    | 0.25    | NA | NA | NA | NA |
| 0.07  | 0.14  | -0.04 | 0.02  | 0.29 | 0.0039   | 0.15    | 0.56    | NA | NA | NA | NA |
| -0.11 | -0.07 | -0.01 | 0.09  | 0.29 | 0.38     | 0.63    | 0.0029  | NA | NA | NA | NA |
| 0.04  | 0.06  | -0.03 | 0.06  | 0.29 | 0.073    | 0.045   | 0.00021 | NA | NA | NA | NA |
| 0.04  | 0.02  | -0.05 | -0.03 | 0.29 | 0.48     | 0.0047  | 0.083   | NA | NA | NA | NA |
| 0.05  | 0.01  | -0.05 | 0.11  | 0.29 | 0.98     | 0.014   | 0.00024 | NA | NA | NA | NA |
| 0.04  | 0.1   | 0.04  | 0.2   | 0.3  | 0.018    | 0.5     | 0.0013  | NA | NA | NA | NA |

|       |       |       |       |      |          |          |          |    |    |    |    |
|-------|-------|-------|-------|------|----------|----------|----------|----|----|----|----|
| 0.03  | 0.04  | -0.04 | -0.02 | 0.3  | 0.12     | 0.0012   | 0.11     | NA | NA | NA | NA |
| -0.04 | 0.21  | -0.07 | 0     | 0.31 | 1.30E-07 | 0.00028  | 0.92     | NA | NA | NA | NA |
| -0.04 | 0.05  | -0.03 | 0.03  | 0.32 | 0.33     | 0.066    | 0.22     | NA | NA | NA | NA |
| 0.02  | 0.01  | -0.04 | -0.02 | 0.32 | 0.72     | 2.00E-04 | 0.096    | NA | NA | NA | NA |
| 0.07  | 0.15  | -0.06 | 0.01  | 0.32 | 0.12     | 0.019    | 0.8      | NA | NA | NA | NA |
| -0.1  | -0.09 | -0.05 | -0.01 | 0.33 | 0.14     | 0.074    | 0.92     | NA | NA | NA | NA |
| 0.2   | 0.09  | -0.14 | 0.24  | 0.34 | 0.82     | 0.61     | 0.26     | NA | NA | NA | NA |
| 0.08  | -0.02 | -0.03 | 0.01  | 0.34 | 0.71     | 0.046    | 0.5      | NA | NA | NA | NA |
| -0.05 | -0.04 | -0.03 | 0.06  | 0.34 | 0.33     | 0.045    | 0.0026   | NA | NA | NA | NA |
| 0.02  | 0.04  | -0.02 | 0.04  | 0.34 | 0.072    | 0.057    | 0.00027  | NA | NA | NA | NA |
| 0.13  | 0.02  | -0.03 | -0.03 | 0.35 | 0.87     | 0.22     | 0.27     | NA | NA | NA | NA |
| -0.04 | 0     | -0.06 | 0.03  | 0.35 | 1        | 0.0052   | 0.23     | NA | NA | NA | NA |
| -0.1  | -0.15 | 0.03  | 0.08  | 0.36 | 0.073    | 0.29     | 0.0042   | NA | NA | NA | NA |
| 0.07  | -0.01 | -0.03 | -0.02 | 0.37 | 0.84     | 0.19     | 0.3      | NA | NA | NA | NA |
| -0.1  | -0.02 | 0.03  | 0.06  | 0.37 | 0.76     | 0.35     | 0.15     | NA | NA | NA | NA |
| 0.04  | -0.02 | -0.03 | -0.02 | 0.37 | 0.53     | 0.081    | 0.37     | NA | NA | NA | NA |
| 0.03  | -0.01 | -0.04 | 0     | 0.37 | 0.76     | 0.0013   | 0.89     | NA | NA | NA | NA |
| -0.02 | 0.02  | 0.01  | 0.03  | 0.37 | 0.24     | 0.55     | 0.024    | NA | NA | NA | NA |
| 0.02  | 0     | -0.01 | -0.03 | 0.39 | 1        | 0.64     | 0.055    | NA | NA | NA | NA |
| 0.75  | 0.75  | -0.13 | 0.09  | 0.39 | 0.82     | 0.0076   | 0.14     | NA | NA | NA | NA |
| 0.29  | 0.15  | 0.07  | 0.06  | 0.39 | 0.4      | 0.016    | 0.06     | NA | NA | NA | NA |
| 0.06  | 0.15  | 0     | 0.09  | 0.39 | 0.0046   | 0.88     | 7.10E-06 | NA | NA | NA | NA |
| 0.13  | 0.1   | -0.08 | -0.04 | 0.4  | 0.93     | 0.027    | 0.45     | NA | NA | NA | NA |
| 0.2   | 0.59  | -0.12 | 0.4   | 0.4  | 0.0082   | 0.067    | 0.00085  | NA | NA | NA | NA |
| 0.02  | 0.02  | -0.07 | -0.07 | 0.4  | 0.38     | 6.70E-07 | 3.40E-05 | NA | NA | NA | NA |
| 0.04  | 0.11  | -0.01 | 0.05  | 0.4  | 0.006    | 0.5      | 0.0039   | NA | NA | NA | NA |
| 0.04  | -0.02 | -0.05 | -0.02 | 0.4  | 0.55     | 0.0069   | 0.34     | NA | NA | NA | NA |
| 0.04  | -0.02 | 0.05  | 0.13  | 0.41 | 0.73     | 0.037    | 1.10E-07 | NA | NA | NA | NA |
| -0.02 | 0.02  | -0.07 | 0.05  | 0.41 | 0.17     | 1.00E-07 | 0.002    | NA | NA | NA | NA |
| 0.03  | 0.05  | 0     | 0.01  | 0.42 | 0.13     | 0.86     | 0.64     | NA | NA | NA | NA |



|       |       |       |       |      |          |          |          |    |    |    |    |
|-------|-------|-------|-------|------|----------|----------|----------|----|----|----|----|
| 0.03  | 0.08  | -0.06 | -0.06 | 0.42 | 0.0045   | 0.0024   | 0.0017   | NA | NA | NA | NA |
| 0.16  | -0.06 | -0.08 | NA    | 0.42 | 0.7      | 0.036    | NA       | NA | NA | NA | NA |
| 0.02  | 0.09  | 0.01  | 0.05  | 0.42 | 0.016    | 0.45     | 0.00062  | NA | NA | NA | NA |
| 0.02  | -0.01 | -0.05 | 0     | 0.43 | 0.69     | 4.10E-06 | 0.88     | NA | NA | NA | NA |
| 0.05  | -0.03 | -0.05 | -0.01 | 0.44 | 0.68     | 0.16     | 0.95     | NA | NA | NA | NA |
| 0.02  | 0.02  | -0.02 | 0.03  | 0.44 | 0.38     | 0.15     | 0.059    | NA | NA | NA | NA |
| 0.04  | 0.11  | -0.04 | 0.02  | 0.45 | 0.011    | 0.023    | 0.4      | NA | NA | NA | NA |
| 0.05  | -0.04 | -0.06 | -0.02 | 0.45 | 0.28     | 0.019    | 0.34     | NA | NA | NA | NA |
| -0.05 | 0.27  | -0.06 | -0.01 | 0.46 | 1.00E-04 | 0.0012   | 0.85     | NA | NA | NA | NA |
| -0.07 | -0.17 | -0.06 | -0.11 | 0.46 | 0.051    | 0.25     | 0.003    | NA | NA | NA | NA |
| 0.05  | -0.04 | -0.02 | -0.01 | 0.46 | 0.38     | 0.46     | 0.81     | NA | NA | NA | NA |
| 0.05  | 0.05  | -0.06 | -0.04 | 0.47 | 0.2      | 0.0067   | 0.074    | NA | NA | NA | NA |
| -0.05 | -0.05 | -0.04 | -0.01 | 0.47 | 0.3      | 0.064    | 0.69     | NA | NA | NA | NA |
| 0.04  | 0.19  | -0.13 | -0.14 | 0.48 | 0.67     | 6.10E-05 | 3.90E-06 | NA | NA | NA | NA |
| 0.04  | -0.01 | -0.09 | -0.06 | 0.48 | 1        | 0.0023   | 0.016    | NA | NA | NA | NA |
| 0.14  | 0.12  | 0     | -0.04 | 0.48 | 0.82     | 1        | 0.39     | NA | NA | NA | NA |
| 0.05  | -0.09 | -0.09 | -0.08 | 0.49 | 0.033    | 0.00027  | 0.0037   | NA | NA | NA | NA |
| 0.8   | 0.07  | 0.12  | 0.21  | 0.49 | 0.57     | 0.0061   | 5.70E-05 | NA | NA | NA | NA |
| 0.11  | 0.01  | 0.06  | 0.02  | 0.49 | 0.99     | 0.12     | 0.61     | NA | NA | NA | NA |
| -0.05 | 0.77  | -0.14 | -0.1  | 0.5  | 7.80E-09 | 0.007    | 0.13     | NA | NA | NA | NA |
| 0.05  | 0.11  | -0.03 | 0.03  | 0.5  | 0.11     | 0.14     | 0.2      | NA | NA | NA | NA |
| 0.14  | 0.61  | 0.01  | 0.01  | 0.51 | 0.00052  | 0.71     | 0.9      | NA | NA | NA | NA |
| 0.06  | 0.16  | -0.01 | 0.06  | 0.51 | 0.065    | 0.71     | 0.02     | NA | NA | NA | NA |
| 0.03  | 0.05  | -0.05 | -0.01 | 0.51 | 0.039    | 0.00097  | 0.39     | NA | NA | NA | NA |
| 0.15  | -0.08 | -0.09 | -0.06 | 0.51 | 0.52     | 2.70E-06 | 0.036    | NA | NA | NA | NA |
| 0.07  | -0.02 | -0.02 | -0.02 | 0.52 | 1        | 0.64     | 0.28     | NA | NA | NA | NA |
| 0.02  | 0.07  | -0.05 | -0.02 | 0.53 | 0.012    | 0.0074   | 0.28     | NA | NA | NA | NA |
| 0.03  | 0.02  | -0.03 | 0.08  | 0.53 | 0.34     | 0.078    | 0.0018   | NA | NA | NA | NA |
| 0.04  | 0.12  | 0.03  | 0.07  | 0.54 | 0.00017  | 0.21     | 0.00038  | NA | NA | NA | NA |
| 0.03  | 0.17  | -0.04 | 0.02  | 0.54 | 0.0016   | 0.028    | 0.37     | NA | NA | NA | NA |

|       |       |       |       |      |          |          |          |    |    |    |    |
|-------|-------|-------|-------|------|----------|----------|----------|----|----|----|----|
| 0.07  | 0.03  | -0.06 | -0.04 | 0.54 | 0.69     | 0.0045   | 0.32     | NA | NA | NA | NA |
| -0.02 | 0.03  | -0.03 | 0.02  | 0.54 | 0.37     | 0.042    | 0.24     | NA | NA | NA | NA |
| 0.02  | 0.01  | -0.04 | 0.04  | 0.55 | 0.8      | 1.00E-04 | 0.0047   | NA | NA | NA | NA |
| 0.02  | -0.02 | -0.03 | -0.02 | 0.55 | 0.41     | 0.00099  | 0.015    | NA | NA | NA | NA |
| 0.02  | 0.06  | -0.03 | 0.07  | 0.56 | 0.049    | 0.032    | 4.90E-06 | NA | NA | NA | NA |
| 0.06  | 0.14  | -0.1  | -0.08 | 0.56 | 0.08     | 5.60E-05 | 0.0022   | NA | NA | NA | NA |
| 0.02  | 0.06  | -0.03 | 0     | 0.56 | 0.23     | 0.2      | 1        | NA | NA | NA | NA |
| 0.05  | 0.55  | 0.02  | 0.01  | 0.57 | 4.00E-08 | 0.72     | 0.78     | NA | NA | NA | NA |
| -0.07 | -0.04 | -0.12 | -0.07 | 0.57 | 0.81     | 0.0012   | 0.16     | NA | NA | NA | NA |
| 0.06  | -0.04 | -0.07 | -0.05 | 0.58 | 0.16     | 0.00065  | 0.051    | NA | NA | NA | NA |
| -0.05 | -0.03 | 0.01  | 0.08  | 0.58 | 0.51     | 0.69     | 0.0026   | NA | NA | NA | NA |
| -0.06 | 0.03  | -0.01 | 0.04  | 0.58 | 0.94     | 0.85     | 0.36     | NA | NA | NA | NA |
| 0.02  | 0.07  | -0.01 | 0.03  | 0.59 | 0.009    | 0.39     | 0.13     | NA | NA | NA | NA |
| 0.07  | 0.04  | -0.1  | -0.09 | 0.6  | 0.31     | 3.20E-06 | 0.00022  | NA | NA | NA | NA |
| 0.13  | -0.05 | -0.05 | 0.06  | 0.61 | 0.87     | 0.071    | 0.09     | NA | NA | NA | NA |
| 0.04  | -0.07 | -0.02 | 0.07  | 0.61 | 0.059    | 0.35     | 0.012    | NA | NA | NA | NA |
| 0.02  | -0.04 | -0.01 | 0.02  | 0.61 | 0.022    | 0.63     | 0.11     | NA | NA | NA | NA |
| 0.02  | 0.01  | -0.02 | 0.02  | 0.61 | 0.81     | 0.35     | 0.26     | NA | NA | NA | NA |
| -0.01 | 0.05  | -0.03 | 0     | 0.62 | 0.0022   | 0.00092  | 0.83     | NA | NA | NA | NA |
| 0.04  | 0.12  | -0.01 | 0.26  | 0.63 | 0.15     | 0.81     | 5.70E-07 | NA | NA | NA | NA |
| 0.09  | 0.08  | -0.07 | 0.01  | 0.63 | 0.33     | 0.0059   | 0.87     | NA | NA | NA | NA |
| 0.39  | 0.03  | 0.05  | 0.03  | 0.63 | 1        | 0.23     | 0.46     | NA | NA | NA | NA |
| 0.02  | -0.04 | 0.01  | 0.02  | 0.64 | 0.27     | 0.76     | 0.28     | NA | NA | NA | NA |
| 0.02  | 0.02  | 0.01  | 0.01  | 0.66 | 0.36     | 0.49     | 0.26     | NA | NA | NA | NA |
| 0.08  | 0.21  | -0.08 | -0.08 | 0.66 | 0.17     | 0.02     | 0.11     | NA | NA | NA | NA |
| 0.02  | 0     | -0.05 | 0     | 0.66 | 1        | 0.016    | 1        | NA | NA | NA | NA |
| -0.02 | -0.02 | 0.01  | 0.01  | 0.67 | 0.58     | 0.63     | 0.7      | NA | NA | NA | NA |
| 0.38  | 0.06  | -0.05 | 0.09  | 0.67 | 0.95     | 0.016    | 0.00041  | NA | NA | NA | NA |
| 0.02  | 0.06  | -0.04 | 0.01  | 0.69 | 0.038    | 0.021    | 0.62     | NA | NA | NA | NA |
| 0.03  | 0.05  | -0.04 | -0.06 | 0.69 | 0.31     | 0.14     | 0.011    | NA | NA | NA | NA |

|       |       |       |       |      |         |          |          |    |    |    |    |
|-------|-------|-------|-------|------|---------|----------|----------|----|----|----|----|
| -0.05 | -0.06 | 0.07  | 0.03  | 0.69 | 0.64    | 0.14     | 0.44     | NA | NA | NA | NA |
| -0.05 | -0.1  | -0.05 | -0.07 | 0.69 | 0.21    | 0.11     | 0.019    | NA | NA | NA | NA |
| -0.03 | -0.1  | 0.04  | 0     | 0.7  | 0.033   | 0.18     | 0.98     | NA | NA | NA | NA |
| 0.03  | 0.02  | -0.04 | -0.04 | 0.7  | 0.87    | 0.015    | 0.076    | NA | NA | NA | NA |
| -0.01 | 0.03  | 0.01  | 0     | 0.71 | 0.097   | 0.68     | 0.83     | NA | NA | NA | NA |
| -0.73 | -0.75 | -0.02 | 0     | 0.71 | 0.82    | 1        | 1        | NA | NA | NA | NA |
| 0.06  | NA    | -0.04 | 0.08  | 0.71 | NA      | 0.34     | 0.062    | NA | NA | NA | NA |
| -0.08 | 0.1   | -0.04 | 0.13  | 0.72 | 1       | 0.15     | 3.20E-05 | NA | NA | NA | NA |
| -0.03 | -0.03 | -0.03 | 0.04  | 0.72 | 0.31    | 0.07     | 0.029    | NA | NA | NA | NA |
| -0.01 | 0     | -0.01 | 0.02  | 0.72 | 0.99    | 0.39     | 0.2      | NA | NA | NA | NA |
| 0.02  | 0.04  | 0.03  | 0.01  | 0.73 | 0.35    | 0.092    | 0.69     | NA | NA | NA | NA |
| -0.03 | -0.07 | -0.07 | -0.02 | 0.74 | 0.1     | 0.005    | 0.5      | NA | NA | NA | NA |
| 0.35  | 0.19  | -0.07 | -0.06 | 0.75 | 0.6     | 0.0048   | 0.13     | NA | NA | NA | NA |
| 0.01  | 0.04  | -0.03 | -0.03 | 0.76 | 0.18    | 0.068    | 0.094    | NA | NA | NA | NA |
| 0.02  | 0.02  | -0.02 | 0.06  | 0.76 | 0.74    | 0.45     | 0.056    | NA | NA | NA | NA |
| 0.05  | 0.02  | -0.12 | -0.09 | 0.77 | 0.59    | 2.10E-05 | 0.00018  | NA | NA | NA | NA |
| 0.02  | -0.01 | -0.03 | 0.06  | 0.77 | 0.78    | 0.047    | 1.50E-05 | NA | NA | NA | NA |
| -0.01 | -0.01 | -0.03 | 0     | 0.77 | 0.83    | 0.015    | 0.93     | NA | NA | NA | NA |
| -0.64 | -0.5  | -0.23 | -0.08 | 0.78 | 1       | 3.60E-05 | 0.44     | NA | NA | NA | NA |
| -0.01 | 0.04  | -0.05 | 0.01  | 0.78 | 0.029   | 4.60E-05 | 0.61     | NA | NA | NA | NA |
| 0.01  | 0.12  | -0.05 | -0.04 | 0.78 | 0.00011 | 0.00026  | 0.015    | NA | NA | NA | NA |
| -0.07 | -0.02 | -0.05 | -0.03 | 0.79 | 0.89    | 0.046    | 0.26     | NA | NA | NA | NA |
| 0.05  | -0.01 | -0.02 | 0     | 0.79 | 1       | 0.29     | 1        | NA | NA | NA | NA |
| 0.05  | 0.19  | 0.01  | 0.03  | 0.8  | 0.014   | 0.62     | 0.25     | NA | NA | NA | NA |
| 0.01  | 0.07  | -0.03 | 0.1   | 0.81 | 0.0042  | 0.085    | 1.30E-06 | NA | NA | NA | NA |
| 0.02  | -0.02 | 0.03  | 0.14  | 0.82 | 0.73    | 0.43     | 0.00069  | NA | NA | NA | NA |
| 0.01  | 0.06  | -0.05 | 0     | 0.83 | 0.0099  | 0.0011   | 0.98     | NA | NA | NA | NA |
| -0.01 | 0.01  | -0.06 | -0.01 | 0.84 | 0.65    | 0.00039  | 0.66     | NA | NA | NA | NA |
| -0.16 | -0.16 | 0.03  | 0.01  | 0.84 | 0.31    | 0.37     | 0.94     | NA | NA | NA | NA |
| 0.02  | 0.03  | -0.01 | 0.01  | 0.85 | 0.32    | 0.89     | 0.58     | NA | NA | NA | NA |

|       |       |       |       |      |          |          |          |    |    |    |    |
|-------|-------|-------|-------|------|----------|----------|----------|----|----|----|----|
| 0.02  | 0.02  | -0.05 | 0.01  | 0.85 | 0.62     | 5.60E-05 | 0.41     | NA | NA | NA | NA |
| 0.04  | 0.18  | 0     | 0.04  | 0.86 | 0.00071  | 1        | 0.062    | NA | NA | NA | NA |
| 0.01  | -0.1  | -0.05 | 0.01  | 0.87 | 0.00012  | 4.20E-05 | 0.28     | NA | NA | NA | NA |
| 0.01  | 0.01  | -0.04 | -0.02 | 0.87 | 0.66     | 0.0086   | 0.085    | NA | NA | NA | NA |
| 0.01  | 0.11  | 0.03  | 0.08  | 0.88 | 0.00092  | 0.32     | 0.0018   | NA | NA | NA | NA |
| 0.67  | -0.24 | 0.05  | -0.02 | 0.88 | 0.37     | 0.35     | 0.84     | NA | NA | NA | NA |
| 0.05  | 0.07  | 0     | 0.01  | 0.89 | 0.34     | 1        | 0.86     | NA | NA | NA | NA |
| 0.1   | 0.02  | -0.06 | -0.01 | 0.89 | 1        | 0.44     | 1        | NA | NA | NA | NA |
| 0     | 0.01  | -0.01 | 0.05  | 0.9  | 0.68     | 0.24     | 2.40E-05 | NA | NA | NA | NA |
| 0.01  | 0     | 0.01  | -0.02 | 0.9  | 1        | 0.82     | 0.46     | NA | NA | NA | NA |
| 0.01  | 0.01  | -0.07 | 0     | 0.9  | 0.78     | 3.70E-08 | 0.84     | NA | NA | NA | NA |
| -0.14 | 0.16  | -0.02 | 0.02  | 0.91 | 0.68     | 0.36     | 0.48     | NA | NA | NA | NA |
| -0.02 | 0     | 0.03  | -0.01 | 0.91 | 1        | 0.44     | 0.91     | NA | NA | NA | NA |
| -0.01 | -0.02 | -0.03 | 0.03  | 0.92 | 0.57     | 0.22     | 0.17     | NA | NA | NA | NA |
| -0.04 | -0.05 | 0.04  | 0.01  | 0.93 | 0.97     | 0.73     | 1        | NA | NA | NA | NA |
| -0.01 | -0.03 | 0.01  | 0     | 0.93 | 0.13     | 0.56     | 0.87     | NA | NA | NA | NA |
| -0.05 | -0.05 | -0.14 | -0.07 | 0.93 | 0.44     | 3.00E-09 | 0.015    | NA | NA | NA | NA |
| -0.02 | -0.11 | -0.02 | 0.05  | 0.95 | 0.0035   | 0.42     | 0.097    | NA | NA | NA | NA |
| 0.01  | 0.02  | -0.04 | 0.02  | 0.95 | 0.75     | 0.011    | 0.42     | NA | NA | NA | NA |
| 0.02  | -0.13 | -0.01 | 0.06  | 0.96 | 1.70E-05 | 0.53     | 3.80E-05 | NA | NA | NA | NA |
| 0.01  | 0     | 0.01  | 0.01  | 0.96 | 0.99     | 0.79     | 0.85     | NA | NA | NA | NA |
| 0.01  | -0.04 | -0.04 | 0.12  | 0.97 | 0.5      | 0.031    | 2.80E-08 | NA | NA | NA | NA |
| -0.02 | 0     | -0.02 | 0.04  | 0.97 | 1        | 0.46     | 0.18     | NA | NA | NA | NA |
| 0     | 0.01  | -0.03 | -0.03 | 0.99 | 0.52     | 0.0075   | 8.00E-04 | NA | NA | NA | NA |
| 0     | -0.02 | -0.02 | 0.04  | 0.99 | 0.38     | 0.17     | 0.028    | NA | NA | NA | NA |
| 0.02  | 0.08  | -0.02 | 0     | 0.99 | 0.28     | 0.49     | 1        | NA | NA | NA | NA |
| 0     | NA    | -0.23 | 0.02  | 1    | NA       | 0.035    | 1        | NA | NA | NA | NA |
| 0     | -0.04 | -0.06 | 0.03  | 1    | 0.15     | 2.90E-05 | 0.16     | NA | NA | NA | NA |
| -0.02 | NA    | -0.02 | 0.15  | 1    | NA       | 0.88     | 0.09     | NA | NA | NA | NA |
| 0     | 0.23  | 0.04  | 0     | 1    | 3.00E-06 | 0.052    | 1        | NA | NA | NA | NA |

|       |       |       |       |   |          |          |         |    |    |    |    |
|-------|-------|-------|-------|---|----------|----------|---------|----|----|----|----|
| 0.06  | 0     | -0.02 | 0.05  | 1 | 1        | 0.54     | 0.053   | NA | NA | NA | NA |
| 0.01  | 0.01  | -0.03 | 0.05  | 1 | 1        | 0.074    | 0.01    | NA | NA | NA | NA |
| -0.01 | 0.1   | -0.03 | 0.04  | 1 | 0.021    | 0.13     | 0.076   | NA | NA | NA | NA |
| -0.01 | -0.01 | -0.02 | -0.03 | 1 | 1        | 0.73     | 0.38    | NA | NA | NA | NA |
| 0     | 0.13  | -0.08 | 0.01  | 1 | 0.14     | 0.063    | 0.95    | NA | NA | NA | NA |
| 0     | 0.17  | 0     | 0.06  | 1 | 8.00E-06 | 0.96     | 0.0099  | NA | NA | NA | NA |
| 0.01  | 0     | -0.04 | -0.02 | 1 | 1        | 0.044    | 0.44    | NA | NA | NA | NA |
| 0.5   | -0.27 | -0.11 | 0.2   | 1 | 0.27     | 7.00E-04 | 0.0032  | NA | NA | NA | NA |
| 0.13  | 0.29  | 0.01  | 0.07  | 1 | 0.029    | 1        | 0.054   | NA | NA | NA | NA |
| -0.01 | -0.03 | -0.06 | -0.02 | 1 | 0.67     | 0.17     | 0.67    | NA | NA | NA | NA |
| 0.03  | 0.19  | 0.25  | 0.01  | 1 | 0.044    | 0.13     | 1       | NA | NA | NA | NA |
| -0.02 | 0     | -0.01 | 0.05  | 1 | 1        | 0.82     | 0.26    | NA | NA | NA | NA |
| -0.01 | -0.02 | -0.07 | -0.04 | 1 | 0.51     | 0.0021   | 0.096   | NA | NA | NA | NA |
| 0     | 0     | 0     | -0.05 | 1 | 1        | 1        | 0.33    | NA | NA | NA | NA |
| -0.01 | 0     | -0.02 | 0.02  | 1 | 1        | 0.75     | 1       | NA | NA | NA | NA |
| -0.33 | NA    | -0.16 | -0.15 | 1 | NA       | 0.056    | 0.14    | NA | NA | NA | NA |
| 0     | -0.03 | -0.01 | 0.06  | 1 | 0.62     | 0.52     | 0.021   | NA | NA | NA | NA |
| 0.01  | 0.21  | -0.06 | -0.06 | 1 | 0.00099  | 0.005    | 0.0068  | NA | NA | NA | NA |
| 0     | 0.03  | -0.09 | -0.06 | 1 | 0.48     | 0.001    | 0.017   | NA | NA | NA | NA |
| 0     | -0.04 | -0.03 | 0.02  | 1 | 0.13     | 0.05     | 0.32    | NA | NA | NA | NA |
| -0.02 | -0.04 | -0.02 | -0.01 | 1 | 0.22     | 0.38     | 0.93    | NA | NA | NA | NA |
| 0.03  | 0.1   | -0.05 | -0.07 | 1 | 0.25     | 0.064    | 0.0049  | NA | NA | NA | NA |
| 0.02  | -0.03 | -0.03 | -0.03 | 1 | 1        | 0.43     | 0.57    | NA | NA | NA | NA |
| 0     | 0.04  | -0.03 | 0.03  | 1 | 0.017    | 0.021    | 0.035   | NA | NA | NA | NA |
| -0.01 | 0.03  | -0.02 | 0.03  | 1 | 0.98     | 0.8      | 0.62    | NA | NA | NA | NA |
| 0.01  | 0     | -0.03 | 0.04  | 1 | 0.99     | 0.04     | 0.038   | NA | NA | NA | NA |
| 0     | 0.13  | -0.07 | 0.03  | 1 | 0.02     | 0.0082   | 0.42    | NA | NA | NA | NA |
| 0     | 0.01  | -0.08 | 0.02  | 1 | 0.74     | 4.50E-05 | 0.4     | NA | NA | NA | NA |
| 0     | 0.06  | 0     | 0.08  | 1 | 0.15     | 0.86     | 0.00041 | NA | NA | NA | NA |
| 0.01  | 0.86  | -0.02 | 0.49  | 1 | 0.00059  | 0.8      | 0.00011 | NA | NA | NA | NA |



|    |       |       |       |    |          |         |        |    |    |    |    |
|----|-------|-------|-------|----|----------|---------|--------|----|----|----|----|
| NA | NA    | 0.28  | 0.42  | NA | NA       | 0.3     | 0.077  | NA | NA | NA | NA |
| NA | 0     | NA    | NA    | NA | 1        | NA      | NA     | NA | NA | NA | NA |
| NA | NA    | NA    | NA    | NA | NA       | NA      | NA     | NA | NA | NA | NA |
| NA | NA    | 0     | 0     | NA | NA       | 1       | 1      | NA | NA | NA | NA |
| NA | 0.29  | -0.01 | 0.06  | NA | 0.31     | 0.76    | 0.099  | NA | NA | NA | NA |
| NA | 0.05  | 0     | 0.03  | NA | 0.97     | 1       | 0.39   | NA | NA | NA | NA |
| NA | 0.01  | -0.04 | -0.02 | NA | 1        | 0.41    | 0.84   | NA | NA | NA | NA |
| NA | 0.66  | -0.07 | -0.07 | NA | 0.00054  | 0.0043  | 0.0093 | NA | NA | NA | NA |
| NA | NA    | -0.03 | 0.05  | NA | NA       | 0.45    | 0.21   | NA | NA | NA | NA |
| NA | NA    | NA    | NA    | NA | NA       | NA      | NA     | NA | NA | NA | NA |
| NA | 0.09  | -0.09 | -0.02 | NA | 0.58     | 0.085   | 0.7    | NA | NA | NA | NA |
| NA | 0.44  | -0.1  | -0.1  | NA | 9.80E-05 | 0.001   | 0.0017 | NA | NA | NA | NA |
| NA | -0.14 | -0.05 | -0.06 | NA | 0.19     | 0.15    | 0.068  | NA | NA | NA | NA |
| NA | NA    | -0.11 | -0.09 | NA | NA       | 0.00025 | 0.0018 | NA | NA | NA | NA |
| NA | NA    | NA    | NA    | NA | NA       | NA      | NA     | NA | NA | NA | NA |
| NA | NA    | -0.01 | 0.04  | NA | NA       | 0.65    | 0.5    | NA | NA | NA | NA |
| NA | NA    | 0     | -0.02 | NA | NA       | 1       | 1      | NA | NA | NA | NA |
| NA | -0.02 | 0.03  | 0.09  | NA | 1        | 0.71    | 0.17   | NA | NA | NA | NA |
| NA | 0.29  | -0.05 | -0.03 | NA | 0.66     | 1       | 1      | NA | NA | NA | NA |
| NA | NA    | NA    | NA    | NA | NA       | NA      | NA     | NA | NA | NA | NA |
| NA | NA    | 0     | 0.09  | NA | NA       | 1       | 0.43   | NA | NA | NA | NA |
| NA | -0.33 | -0.72 | NA    | NA | 1        | 0.65    | NA     | NA | NA | NA | NA |
| NA | 0.33  | 0     | 0.05  | NA | 0.21     | 1       | 0.52   | NA | NA | NA | NA |
| NA | NA    | NA    | NA    | NA | NA       | NA      | NA     | NA | NA | NA | NA |
| NA | -0.18 | -0.05 | 0.1   | NA | 0.0098   | 0.082   | 0.0012 | NA | NA | NA | NA |
| NA | -0.03 | -0.01 | 0.12  | NA | 0.95     | 0.94    | 0.005  | NA | NA | NA | NA |
| NA | 0.73  | -0.05 | -0.09 | NA | 0.16     | 0.34    | 0.18   | NA | NA | NA | NA |
| NA | 0.17  | -0.04 | -0.06 | NA | 0.25     | 0.26    | 0.049  | NA | NA | NA | NA |
| NA | 0.32  | -0.14 | -0.1  | NA | 0.094    | 0.002   | 0.084  | NA | NA | NA | NA |
| NA | -0.75 | -0.09 | -0.03 | NA | 0.39     | 0.032   | 0.63   | NA | NA | NA | NA |

|       |       |       |       |          |          |          |         |    |    |    |    |
|-------|-------|-------|-------|----------|----------|----------|---------|----|----|----|----|
| NA    | -0.13 | -0.01 | 0.01  | NA       | 0.15     | 0.78     | 0.94    | NA | NA | NA | NA |
| NA    | NA    | -0.11 | -0.2  | NA       | NA       | 0.38     | 0.049   | NA | NA | NA | NA |
| NA    | NA    | -0.08 | 0.1   | NA       | NA       | 0.77     | 0.94    | NA | NA | NA | NA |
| NA    | NA    | -0.13 | -0.08 | NA       | NA       | 8.50E-05 | 0.068   | NA | NA | NA | NA |
| NA    | -0.03 | -0.05 | -0.05 | NA       | 1        | 0.37     | 0.39    | NA | NA | NA | NA |
| NA    | 0.19  | -0.02 | 0.12  | NA       | 0.037    | 0.53     | 0.00077 | NA | NA | NA | NA |
| NA    | NA    | NA    | NA    | NA       | NA       | NA       | NA      | NA | NA | NA | NA |
| NA    | 0.39  | 0.07  | 0.01  | NA       | 6.60E-06 | 0.39     | 0.8     | NA | NA | NA | NA |
| NA    | NA    | -0.03 | 0     | NA       | NA       | 0.66     | 1       | NA | NA | NA | NA |
| NA    | NA    | NA    | NA    | NA       | NA       | NA       | NA      | NA | NA | NA | NA |
| NA    | -0.42 | -0.06 | 0.17  | NA       | 0.74     | 0.083    | 0.017   | NA | NA | NA | NA |
| NA    | 0.04  | -0.01 | -0.01 | NA       | 0.47     | 0.74     | 0.89    | NA | NA | NA | NA |
| NA    | NA    | -0.02 | -0.11 | NA       | NA       | 0.85     | 0.1     | NA | NA | NA | NA |
| NA    | -0.02 | -0.01 | 0.04  | NA       | 0.6      | 0.54     | 0.051   | NA | NA | NA | NA |
| NA    | -0.07 | -0.06 | -0.01 | NA       | 1        | 0.15     | 0.96    | NA | NA | NA | NA |
| NA    | NA    | -0.2  | 0.36  | NA       | NA       | 9.90E-06 | 0.00022 | NA | NA | NA | NA |
| NA    | NA    | NA    | NA    | NA       | NA       | NA       | NA      | NA | NA | NA | NA |
| NA    | NA    | -0.01 | 0.02  | NA       | NA       | 0.76     | 0.69    | NA | NA | NA | NA |
| NA    | 0.5   | -0.09 | 0.29  | NA       | 0.82     | 0.059    | 0.04    | NA | NA | NA | NA |
| NA    | 0.09  | -0.01 | -0.02 | NA       | 1        | 0.87     | 0.59    | NA | NA | NA | NA |
| NA    | NA    | -0.09 | -0.06 | NA       | NA       | 0.25     | 0.63    | NA | NA | NA | NA |
| NA    | NA    | 0.08  | 0.13  | NA       | NA       | 0.34     | 0.03    | NA | NA | NA | NA |
| 0.58  | 0.04  | -0.03 | 0.04  | 2.70E-09 | 0.42     | 0.21     | 0.15    | NA | NA | NA | NA |
| 0.3   | 0.11  | 0.01  | 0.05  | 6.30E-09 | 0.011    | 0.64     | 0.048   | NA | NA | NA | NA |
| -0.49 | -0.54 | -0.01 | 0.03  | 1.00E-08 | 2.10E-09 | 0.96     | 0.41    | NA | NA | NA | NA |
| 0.28  | 0.07  | -0.05 | 0.03  | 1.70E-08 | 0.054    | 0.017    | 0.18    | NA | NA | NA | NA |
| -0.87 | 0     | -0.05 | -0.05 | 5.30E-08 | 1        | 0.5      | 0.55    | NA | NA | NA | NA |
| 0.23  | 0.08  | -0.02 | 0.03  | 3.80E-07 | 0.005    | 0.21     | 0.12    | NA | NA | NA | NA |
| 0.25  | 0.13  | -0.03 | 0.05  | 6.10E-07 | 0.00013  | 0.11     | 0.03    | NA | NA | NA | NA |
| 0.11  | 0.09  | -0.02 | 0     | 1.10E-06 | 4.90E-07 | 0.07     | 0.94    | NA | NA | NA | NA |



|      |       |       |       |          |          |          |          |    |    |    |    |
|------|-------|-------|-------|----------|----------|----------|----------|----|----|----|----|
| 0.13 | 0.09  | -0.01 | -0.01 | 1.30E-06 | 1.10E-06 | 0.77     | 0.7      | NA | NA | NA | NA |
| 0.11 | 0.13  | -0.03 | 0.07  | 1.40E-06 | 6.50E-07 | 0.0035   | 4.60E-06 | NA | NA | NA | NA |
| 0.55 | 0.87  | -0.05 | -0.02 | 3.70E-06 | 0.32     | 0.16     | 0.76     | NA | NA | NA | NA |
| 0.13 | 0.02  | -0.05 | 0.03  | 7.00E-06 | 0.45     | 0.0022   | 0.12     | NA | NA | NA | NA |
| 0.19 | 0.15  | -0.04 | -0.02 | 8.10E-06 | 2.10E-06 | 0.053    | 0.24     | NA | NA | NA | NA |
| 0.95 | 0.09  | 0.01  | 0.06  | 8.20E-06 | 0.39     | 0.71     | 0.029    | NA | NA | NA | NA |
| 0.25 | 0.09  | -0.02 | 0.05  | 9.00E-06 | 0.00097  | 0.47     | 0.0085   | NA | NA | NA | NA |
| 0.34 | -0.17 | -0.04 | 0.01  | 9.40E-06 | 0.0067   | 0.24     | 0.74     | NA | NA | NA | NA |
| 0.54 | 0.39  | -0.05 | -0.03 | 1.30E-05 | 1.60E-07 | 0.055    | 0.46     | NA | NA | NA | NA |
| 0.35 | 0.07  | -0.11 | -0.01 | 1.50E-05 | 0.063    | 5.60E-08 | 0.65     | NA | NA | NA | NA |
| 0.28 | 0.03  | -0.03 | -0.01 | 1.90E-05 | 0.48     | 0.48     | 0.86     | NA | NA | NA | NA |
| 0.19 | 0     | -0.02 | 0     | 3.50E-05 | 1        | 0.12     | 0.96     | NA | NA | NA | NA |
| 0.08 | 0.1   | -0.03 | 0.05  | 4.20E-05 | 1.50E-08 | 0.013    | 1.30E-05 | NA | NA | NA | NA |
| 0.19 | 0.09  | -0.01 | 0.06  | 5.00E-05 | 0.016    | 0.7      | 0.0035   | NA | NA | NA | NA |
| 0.08 | 0.03  | -0.03 | -0.01 | 8.70E-05 | 0.0059   | 0.0068   | 0.46     | NA | NA | NA | NA |
| 0.15 | 0.11  | -0.08 | -0.01 | 1.00E-04 | 8.40E-07 | 1.80E-06 | 0.75     | NA | NA | NA | NA |
| 0.17 | 0.1   | -0.04 | 0.01  | 0.00013  | 0.0084   | 0.026    | 0.51     | NA | NA | NA | NA |
| 0.08 | 0.04  | -0.07 | 0.02  | 0.00014  | 0.032    | 3.30E-06 | 0.21     | NA | NA | NA | NA |
| 0.13 | -0.02 | -0.01 | 0.06  | 0.00017  | 0.52     | 0.51     | 3.00E-04 | NA | NA | NA | NA |
| 0.39 | 0.06  | 0.04  | 0.07  | 2.00E-04 | 0.29     | 0.018    | 5.50E-05 | NA | NA | NA | NA |
| 0.18 | 0.04  | -0.06 | -0.02 | 0.00021  | 0.23     | 0.00085  | 0.53     | NA | NA | NA | NA |
| 0.47 | 0.17  | -0.06 | 0     | 0.00021  | 0.0076   | 0.15     | 1        | NA | NA | NA | NA |
| 0.14 | 0.01  | -0.04 | -0.01 | 0.00024  | 0.75     | 0.075    | 0.69     | NA | NA | NA | NA |
| 0.08 | 0.03  | -0.06 | -0.02 | 0.00027  | 0.04     | 5.20E-08 | 0.061    | NA | NA | NA | NA |
| 0.11 | 0.01  | -0.03 | 0.02  | 0.00028  | 0.51     | 0.0066   | 0.13     | NA | NA | NA | NA |
| 0.13 | 0.12  | -0.03 | 0.03  | 0.00029  | 0.0015   | 0.12     | 0.22     | NA | NA | NA | NA |
| 0.26 | 0.32  | -0.04 | 0.03  | 3.00E-04 | 1.80E-09 | 0.053    | 0.2      | NA | NA | NA | NA |
| 0.16 | 0.08  | -0.05 | -0.04 | 3.00E-04 | 0.047    | 0.00043  | 0.023    | NA | NA | NA | NA |
| 0.22 | -0.04 | -0.1  | -0.07 | 0.00037  | 0.58     | 1.30E-08 | 0.00074  | NA | NA | NA | NA |
| 0.21 | 0.16  | -0.05 | -0.03 | 0.00045  | 0.0031   | 0.024    | 0.22     | NA | NA | NA | NA |

|       |       |       |       |          |          |          |          |    |    |    |    |
|-------|-------|-------|-------|----------|----------|----------|----------|----|----|----|----|
| 0.15  | 0.17  | -0.02 | 0.04  | 0.00049  | 0.0029   | 0.43     | 0.22     | NA | NA | NA | NA |
| -0.15 | -0.17 | 0.02  | 0.01  | 0.00058  | 0.00012  | 0.59     | 0.81     | NA | NA | NA | NA |
| 0.28  | 0.02  | -0.1  | 0     | 6.00E-04 | 0.82     | 0.013    | 1        | NA | NA | NA | NA |
| 0.17  | 0.08  | -0.06 | 0.07  | 0.00063  | 8.00E-04 | 0.016    | 0.019    | NA | NA | NA | NA |
| 0.21  | 0.03  | -0.06 | -0.05 | 0.00063  | 0.5      | 0.0033   | 0.02     | NA | NA | NA | NA |
| -0.3  | -0.27 | 0.05  | 0.13  | 0.00086  | 0.00039  | 0.3      | 1.00E-05 | NA | NA | NA | NA |
| 0.17  | 0.02  | -0.06 | 0.02  | 0.0014   | 0.71     | 0.0026   | 0.42     | NA | NA | NA | NA |
| -0.12 | -0.1  | -0.06 | -0.03 | 0.0014   | 0.0036   | 0.00018  | 0.14     | NA | NA | NA | NA |
| 0.1   | 0.04  | -0.01 | 0.02  | 0.0014   | 0.14     | 0.64     | 0.31     | NA | NA | NA | NA |
| 0.19  | 0.22  | -0.05 | -0.02 | 0.0021   | 4.00E-05 | 0.061    | 0.58     | NA | NA | NA | NA |
| -0.13 | -0.07 | -0.01 | 0.02  | 0.0028   | 0.22     | 0.85     | 0.53     | NA | NA | NA | NA |
| -0.12 | -0.07 | -0.06 | -0.01 | 0.003    | 0.16     | 7.90E-05 | 0.83     | NA | NA | NA | NA |
| 0.29  | 0.5   | 0     | 0.08  | 0.0031   | 3.80E-05 | 0.93     | 1.70E-05 | NA | NA | NA | NA |
| -0.13 | -0.03 | -0.07 | 0.01  | 0.0031   | 0.78     | 0.00032  | 0.8      | NA | NA | NA | NA |
| 0.05  | 0     | -0.02 | 0.06  | 0.0034   | 0.94     | 0.056    | 6.20E-07 | NA | NA | NA | NA |
| 0.41  | 0.07  | -0.12 | 0.02  | 0.0034   | 0.64     | 0.00017  | 0.64     | NA | NA | NA | NA |
| -0.14 | -0.16 | -0.04 | 0.06  | 0.0049   | 0.0052   | 0.055    | 0.02     | NA | NA | NA | NA |
| 0.78  | 0.06  | -0.09 | 0.8   | 0.0053   | 1        | 0.15     | 0.47     | NA | NA | NA | NA |
| 0.09  | 0.12  | -0.04 | 0.08  | 0.0054   | 0.00094  | 0.014    | 2.20E-05 | NA | NA | NA | NA |
| 0.17  | 0.16  | -0.04 | -0.02 | 0.006    | 0.00061  | 0.0077   | 0.33     | NA | NA | NA | NA |
| 0.23  | 0.15  | -0.03 | 0     | 0.0067   | 0.022    | 0.18     | 0.95     | NA | NA | NA | NA |
| 0.07  | 0.04  | -0.08 | -0.05 | 0.0072   | 0.062    | 1.50E-08 | 0.00076  | NA | NA | NA | NA |
| 0.21  | 0.2   | 0.04  | 0.03  | 0.0086   | 2.60E-05 | 0.071    | 0.16     | NA | NA | NA | NA |
| 0.09  | 0.08  | -0.05 | 0.01  | 0.0091   | 0.0083   | 0.0013   | 0.48     | NA | NA | NA | NA |
| 0.16  | 0.06  | -0.02 | 0.07  | 0.0092   | 0.17     | 0.43     | 0.0092   | NA | NA | NA | NA |
| 0.1   | 0.15  | 0.01  | 0.03  | 0.01     | 3.40E-07 | 0.72     | 0.046    | NA | NA | NA | NA |
| 0.11  | 0.22  | 0     | 0.08  | 0.011    | 3.10E-08 | 0.99     | 0.054    | NA | NA | NA | NA |
| 0.21  | -0.05 | -0.01 | 0.01  | 0.011    | 0.82     | 0.72     | 0.82     | NA | NA | NA | NA |
| 0.19  | NA    | -0.05 | -0.01 | 0.012    | NA       | 0.1      | 0.91     | NA | NA | NA | NA |
| 0.13  | 0.05  | -0.04 | -0.01 | 0.012    | 0.3      | 0.04     | 0.86     | NA | NA | NA | NA |

|       |       |       |       |       |          |          |          |    |    |    |    |
|-------|-------|-------|-------|-------|----------|----------|----------|----|----|----|----|
| 0.04  | 0.03  | -0.04 | -0.03 | 0.012 | 0.18     | 0.0082   | 0.049    | NA | NA | NA | NA |
| 0.14  | 0.12  | -0.01 | 0.02  | 0.013 | 0.0055   | 0.48     | 0.32     | NA | NA | NA | NA |
| 0.4   | 0.58  | 0.05  | -0.1  | 0.017 | 0.0028   | 0.89     | 0.45     | NA | NA | NA | NA |
| 0.07  | 0.01  | 0     | 0.02  | 0.02  | 0.66     | 0.88     | 0.24     | NA | NA | NA | NA |
| 0.07  | -0.02 | -0.05 | -0.05 | 0.021 | 0.45     | 0.00069  | 3.00E-04 | NA | NA | NA | NA |
| 0.14  | 0.27  | -0.03 | 0.05  | 0.024 | 1.80E-07 | 0.42     | 0.18     | NA | NA | NA | NA |
| 0.16  | 0.19  | -0.05 | 0     | 0.025 | 0.00024  | 0.03     | 0.94     | NA | NA | NA | NA |
| 0.06  | 0.08  | -0.08 | -0.06 | 0.032 | 0.011    | 0.00013  | 0.0013   | NA | NA | NA | NA |
| 0.1   | -0.05 | 0.02  | 0.02  | 0.032 | 0.16     | 0.39     | 0.24     | NA | NA | NA | NA |
| 0.1   | 0.04  | -0.04 | -0.03 | 0.033 | 0.19     | 0.012    | 0.14     | NA | NA | NA | NA |
| 0.04  | 0.01  | -0.01 | 0.01  | 0.034 | 0.54     | 0.26     | 0.53     | NA | NA | NA | NA |
| 0.08  | 0.13  | -0.04 | -0.01 | 0.036 | 0.0055   | 0.062    | 0.56     | NA | NA | NA | NA |
| 0.04  | 0.03  | -0.02 | 0.01  | 0.04  | 0.081    | 0.071    | 0.14     | NA | NA | NA | NA |
| 0.04  | 0     | 0     | 0.07  | 0.04  | 1        | 0.93     | 0.00028  | NA | NA | NA | NA |
| 0.08  | 0.07  | -0.02 | 0.01  | 0.041 | 0.15     | 0.18     | 0.45     | NA | NA | NA | NA |
| 0.08  | 0.03  | -0.02 | -0.01 | 0.041 | 0.3      | 0.55     | 0.76     | NA | NA | NA | NA |
| -0.16 | -0.16 | -0.11 | -0.04 | 0.041 | 0.00063  | 2.00E-07 | 0.076    | NA | NA | NA | NA |
| 0.08  | 0.05  | -0.08 | 0.02  | 0.044 | 0.13     | 0.0027   | 0.5      | NA | NA | NA | NA |
| 0.22  | NA    | -0.05 | -0.03 | 0.044 | NA       | 0.29     | 0.57     | NA | NA | NA | NA |
| 0.09  | -0.06 | -0.03 | -0.02 | 0.047 | 0.099    | 0.046    | 0.35     | NA | NA | NA | NA |
| 0.14  | 0.05  | -0.05 | 0.01  | 0.048 | 0.44     | 0.15     | 0.92     | NA | NA | NA | NA |
| 0.05  | 0     | -0.02 | 0.06  | 0.048 | 0.99     | 0.16     | 0.0068   | NA | NA | NA | NA |
| 0.11  | 0.18  | -0.03 | 0.01  | 0.048 | 1.40E-05 | 0.12     | 0.54     | NA | NA | NA | NA |
| -0.11 | -0.15 | 0.01  | 0.01  | 0.051 | 0.11     | 0.81     | 0.65     | NA | NA | NA | NA |
| 0.06  | 0     | -0.04 | 0.07  | 0.054 | 0.96     | 0.00029  | 4.10E-07 | NA | NA | NA | NA |
| 0.04  | 0.02  | 0     | 0.08  | 0.054 | 0.31     | 0.84     | 1.10E-06 | NA | NA | NA | NA |
| -0.26 | -0.33 | -0.03 | 0.05  | 0.054 | 0.024    | 0.71     | 0.4      | NA | NA | NA | NA |
| -0.11 | 0.34  | -0.02 | 0.01  | 0.054 | 0.016    | 0.6      | 0.85     | NA | NA | NA | NA |
| -0.05 | -0.05 | -0.04 | 0.03  | 0.055 | 0.027    | 0.0037   | 0.068    | NA | NA | NA | NA |
| 0.13  | 0.02  | -0.08 | 0.02  | 0.058 | 0.86     | 0.019    | 0.67     | NA | NA | NA | NA |

|       |       |       |       |       |          |         |          |    |    |    |    |
|-------|-------|-------|-------|-------|----------|---------|----------|----|----|----|----|
| 0.06  | 0.03  | -0.01 | 0.06  | 0.059 | 0.38     | 0.68    | 1.80E-05 | NA | NA | NA | NA |
| 0.04  | 0.04  | -0.01 | 0.02  | 0.062 | 0.033    | 0.48    | 0.25     | NA | NA | NA | NA |
| 0.06  | 0.06  | -0.06 | 0.01  | 0.065 | 0.17     | 0.00053 | 0.74     | NA | NA | NA | NA |
| 0.23  | -0.07 | -0.02 | 0.05  | 0.069 | 0.12     | 0.49    | 0.076    | NA | NA | NA | NA |
| 0.22  | 0.19  | -0.01 | 0.15  | 0.071 | 0.72     | 1       | 0.011    | NA | NA | NA | NA |
| 0.08  | 0.05  | -0.02 | 0.01  | 0.081 | 0.096    | 0.09    | 0.54     | NA | NA | NA | NA |
| -0.07 | 0.07  | -0.03 | 0.07  | 0.083 | 0.24     | 0.11    | 0.00028  | NA | NA | NA | NA |
| 0.1   | 0.1   | -0.02 | 0.08  | 0.083 | 0.012    | 0.28    | 0.00023  | NA | NA | NA | NA |
| 0.26  | 0.06  | -0.03 | 0.01  | 0.083 | 0.26     | 0.17    | 0.74     | NA | NA | NA | NA |
| 0.11  | 0.01  | -0.01 | 0.03  | 0.085 | 0.64     | 0.63    | 0.036    | NA | NA | NA | NA |
| 0.05  | 0.02  | -0.01 | 0.02  | 0.086 | 0.51     | 0.4     | 0.15     | NA | NA | NA | NA |
| 0.09  | -0.06 | -0.02 | 0.04  | 0.088 | 0.0015   | 0.24    | 0.01     | NA | NA | NA | NA |
| 0.05  | 0.1   | -0.02 | 0     | 0.091 | 6.60E-05 | 0.068   | 0.78     | NA | NA | NA | NA |
| 0.05  | 0.01  | -0.04 | 0.03  | 0.093 | 0.89     | 0.022   | 0.17     | NA | NA | NA | NA |
| 0.1   | 0.09  | -0.02 | 0     | 0.098 | 0.0074   | 0.21    | 0.86     | NA | NA | NA | NA |
| 0.22  | 0.78  | 0.11  | 0.2   | 0.1   | 8.70E-08 | 0.18    | 0.1      | NA | NA | NA | NA |
| 0.05  | 0.07  | -0.03 | 0.01  | 0.1   | 0.1      | 0.071   | 0.52     | NA | NA | NA | NA |
| 0.09  | 0.44  | 0.01  | 0.05  | 0.12  | 7.30E-09 | 0.75    | 0.12     | NA | NA | NA | NA |
| 0.3   | 0.31  | 0.06  | 0.18  | 0.12  | 0.0086   | 0.4     | 0.034    | NA | NA | NA | NA |
| -0.09 | -0.04 | -0.01 | 0     | 0.12  | 1        | 0.86    | 0.94     | NA | NA | NA | NA |
| 0.06  | -0.01 | 0     | 0     | 0.13  | 0.89     | 0.92    | 0.84     | NA | NA | NA | NA |
| -0.09 | 0.18  | 0.01  | 0.03  | 0.13  | 0.24     | 0.81    | 0.55     | NA | NA | NA | NA |
| 0.21  | 0.11  | -0.01 | 0.14  | 0.13  | 0.16     | 0.71    | 0.002    | NA | NA | NA | NA |
| 0.08  | 0.05  | -0.02 | 0.02  | 0.14  | 0.51     | 0.26    | 0.34     | NA | NA | NA | NA |
| -0.12 | 0.1   | -0.12 | 0     | 0.15  | 0.95     | 0.0017  | 1        | NA | NA | NA | NA |
| -0.04 | -0.05 | -0.06 | -0.04 | 0.15  | 0.029    | 0.0015  | 0.025    | NA | NA | NA | NA |
| 0.07  | 0.02  | 0.01  | -0.02 | 0.15  | 0.86     | 0.68    | 0.27     | NA | NA | NA | NA |
| -0.05 | 0.03  | -0.04 | 0.02  | 0.16  | 0.35     | 0.015   | 0.12     | NA | NA | NA | NA |
| 0.13  | 0.05  | -0.01 | 0.01  | 0.16  | 0.38     | 0.88    | 0.97     | NA | NA | NA | NA |
| -0.07 | -0.03 | -0.02 | -0.01 | 0.16  | 0.46     | 0.24    | 0.56     | NA | NA | NA | NA |

|       |       |       |       |      |          |          |          |    |    |    |    |
|-------|-------|-------|-------|------|----------|----------|----------|----|----|----|----|
| -0.15 | 0.42  | -0.01 | 0.11  | 0.17 | 0.0022   | 0.73     | 0.0013   | NA | NA | NA | NA |
| 0.08  | 0.06  | -0.01 | 0.11  | 0.17 | 0.37     | 0.7      | 7.70E-07 | NA | NA | NA | NA |
| -0.07 | 0.02  | -0.08 | 0.06  | 0.17 | 0.86     | 0.039    | 0.24     | NA | NA | NA | NA |
| -0.4  | -0.17 | -0.08 | -0.04 | 0.17 | 0.47     | 0.3      | 0.62     | NA | NA | NA | NA |
| 0.06  | 0.12  | -0.03 | 0.01  | 0.17 | 0.00053  | 0.34     | 0.87     | NA | NA | NA | NA |
| 0.07  | 0.05  | -0.08 | 0.07  | 0.17 | 0.097    | 5.90E-05 | 0.0076   | NA | NA | NA | NA |
| -0.1  | -0.1  | -0.02 | 0.03  | 0.18 | 0.035    | 0.28     | 0.11     | NA | NA | NA | NA |
| 0.19  | 0.12  | -0.02 | -0.02 | 0.18 | 0.076    | 0.87     | 0.74     | NA | NA | NA | NA |
| 0.09  | 0.04  | -0.06 | 0.02  | 0.18 | 0.47     | 0.008    | 0.26     | NA | NA | NA | NA |
| 0.12  | 0.21  | 0.03  | 0.11  | 0.18 | 0.0036   | 0.38     | 0.00071  | NA | NA | NA | NA |
| -0.15 | -0.08 | 0     | 0     | 0.19 | 0.81     | 1        | 1        | NA | NA | NA | NA |
| 0.16  | -0.11 | 0.02  | 0.06  | 0.19 | 0.64     | 0.48     | 0.032    | NA | NA | NA | NA |
| 0.14  | 0.05  | -0.01 | 0.01  | 0.2  | 0.53     | 0.84     | 0.74     | NA | NA | NA | NA |
| 0.04  | 0.11  | 0     | 0.02  | 0.21 | 5.20E-05 | 0.96     | 0.36     | NA | NA | NA | NA |
| 0.18  | 0.03  | -0.06 | 0.1   | 0.21 | 0.91     | 0.09     | 0.0073   | NA | NA | NA | NA |
| -0.07 | 0.06  | -0.06 | -0.04 | 0.21 | 0.41     | 0.012    | 0.11     | NA | NA | NA | NA |
| -0.07 | 0.06  | -0.04 | 0.01  | 0.21 | 0.38     | 0.0067   | 0.73     | NA | NA | NA | NA |
| 0.04  | -0.01 | -0.03 | -0.02 | 0.21 | 0.65     | 0.023    | 0.19     | NA | NA | NA | NA |
| -0.29 | -0.14 | -0.16 | 0.49  | 0.21 | 0.2      | 0.17     | 0.53     | NA | NA | NA | NA |
| -0.03 | -0.01 | -0.06 | 0     | 0.21 | 0.55     | 7.60E-05 | 0.86     | NA | NA | NA | NA |
| 0.08  | 0.12  | -0.06 | 0.01  | 0.22 | 0.091    | 0.056    | 0.92     | NA | NA | NA | NA |
| 0.24  | 0.21  | 0.08  | 0.07  | 0.22 | 0.21     | 1        | 0.14     | NA | NA | NA | NA |
| -0.08 | 0.1   | -0.05 | 0.02  | 0.24 | 0.17     | 0.04     | 0.49     | NA | NA | NA | NA |
| -0.05 | 0.04  | -0.01 | 0.06  | 0.24 | 0.32     | 0.49     | 0.0044   | NA | NA | NA | NA |
| 0.1   | -0.06 | -0.07 | 0.03  | 0.25 | 0.045    | 0.00012  | 0.24     | NA | NA | NA | NA |
| -0.03 | 0.02  | -0.04 | 0.01  | 0.25 | 0.57     | 5.30E-06 | 0.33     | NA | NA | NA | NA |
| 0.11  | 0.12  | -0.04 | 0.03  | 0.25 | 0.21     | 0.36     | 0.42     | NA | NA | NA | NA |
| 0.12  | 0.14  | -0.01 | 0.04  | 0.25 | 0.02     | 0.85     | 0.23     | NA | NA | NA | NA |
| 0.17  | 0.17  | -0.08 | 0.01  | 0.26 | 0.18     | 3.40E-05 | 0.77     | NA | NA | NA | NA |
| 0.23  | 0     | -0.05 | -0.1  | 0.26 | 1        | 0.35     | 0.012    | NA | NA | NA | NA |

|       |       |       |       |      |          |          |          |    |    |    |    |
|-------|-------|-------|-------|------|----------|----------|----------|----|----|----|----|
| -0.12 | 0.07  | -0.01 | 0.04  | 0.26 | 0.51     | 0.92     | 0.086    | NA | NA | NA | NA |
| 0.03  | -0.05 | -0.04 | -0.07 | 0.27 | 0.17     | 0.8      | 0.88     | NA | NA | NA | NA |
| 0.15  | 0.24  | 0.03  | 0.11  | 0.27 | 0.012    | 0.19     | 0.00014  | NA | NA | NA | NA |
| 0.04  | 0.04  | -0.12 | -0.1  | 0.28 | 0.39     | 0.00011  | 0.0051   | NA | NA | NA | NA |
| -0.8  | -0.89 | -0.02 | 0     | 0.28 | 0.0099   | 0.44     | 1        | NA | NA | NA | NA |
| 0.1   | 0.09  | -0.07 | -0.02 | 0.29 | 0.21     | 0.0036   | 0.55     | NA | NA | NA | NA |
| 0.09  | 0.06  | -0.08 | -0.01 | 0.29 | 0.11     | 0.0047   | 0.92     | NA | NA | NA | NA |
| -0.04 | -0.04 | 0.03  | 0.03  | 0.3  | 0.22     | 0.14     | 0.077    | NA | NA | NA | NA |
| -0.04 | 0.04  | 0     | 0.03  | 0.3  | 0.31     | 0.96     | 0.061    | NA | NA | NA | NA |
| -0.06 | 0.06  | -0.01 | 0     | 0.3  | 0.23     | 0.47     | 0.97     | NA | NA | NA | NA |
| -0.31 | -0.35 | -0.1  | -0.01 | 0.31 | 0.025    | 0.0011   | 0.82     | NA | NA | NA | NA |
| 0.04  | -0.01 | -0.01 | 0.05  | 0.32 | 0.8      | 0.61     | 0.048    | NA | NA | NA | NA |
| 0.03  | 0.11  | 0     | 0.05  | 0.33 | 3.90E-05 | 1        | 0.0098   | NA | NA | NA | NA |
| 0.03  | 0.06  | 0     | 0.08  | 0.34 | 0.0049   | 0.9      | 1.90E-07 | NA | NA | NA | NA |
| 0.22  | 0.01  | -0.12 | -0.11 | 0.35 | 0.92     | 0.00089  | 0.00041  | NA | NA | NA | NA |
| 0.05  | 0.25  | 0     | 0.02  | 0.35 | 0.00016  | 0.85     | 0.36     | NA | NA | NA | NA |
| -0.08 | -0.15 | 0.05  | 0.06  | 0.35 | 0.0012   | 0.059    | 0.0079   | NA | NA | NA | NA |
| 0.06  | 0.16  | -0.05 | -0.04 | 0.35 | 0.00059  | 0.0053   | 0.024    | NA | NA | NA | NA |
| 0.17  | 0.21  | -0.04 | -0.09 | 0.35 | 0.0017   | 0.35     | 0.01     | NA | NA | NA | NA |
| 0.07  | -0.03 | -0.03 | 0.04  | 0.35 | 0.53     | 0.047    | 0.052    | NA | NA | NA | NA |
| -0.06 | 0.13  | -0.02 | 0.01  | 0.35 | 0.072    | 0.24     | 0.77     | NA | NA | NA | NA |
| 0.09  | 0.08  | -0.03 | -0.02 | 0.36 | 0.85     | 0.35     | 0.47     | NA | NA | NA | NA |
| 0.03  | -0.03 | -0.04 | 0.02  | 0.36 | 0.17     | 0.0054   | 0.2      | NA | NA | NA | NA |
| 0.03  | 0.04  | -0.02 | 0.01  | 0.36 | 0.085    | 0.027    | 0.26     | NA | NA | NA | NA |
| 0.34  | -0.16 | -0.15 | 0.75  | 0.37 | 0.61     | 7.50E-05 | 0.0011   | NA | NA | NA | NA |
| 0.03  | 0.01  | -0.06 | -0.01 | 0.37 | 0.57     | 2.00E-05 | 0.55     | NA | NA | NA | NA |
| 0.03  | -0.01 | -0.05 | 0     | 0.38 | 0.66     | 5.30E-08 | 0.9      | NA | NA | NA | NA |
| -0.02 | -0.01 | -0.01 | -0.01 | 0.38 | 0.62     | 0.27     | 0.39     | NA | NA | NA | NA |
| 0.03  | 0.02  | -0.06 | -0.02 | 0.39 | 0.62     | 1.00E-07 | 0.11     | NA | NA | NA | NA |
| 0.06  | 0.04  | -0.03 | 0.04  | 0.39 | 0.4      | 0.074    | 0.096    | NA | NA | NA | NA |

|       |       |       |       |      |          |          |          |    |    |    |    |
|-------|-------|-------|-------|------|----------|----------|----------|----|----|----|----|
| 0.06  | 0.03  | -0.04 | 0.02  | 0.39 | 0.91     | 0.054    | 0.58     | NA | NA | NA | NA |
| -0.03 | -0.07 | -0.01 | 0.02  | 0.39 | 0.017    | 0.54     | 0.31     | NA | NA | NA | NA |
| -0.33 | -0.75 | NA    | NA    | 0.4  | 0.0057   | NA       | NA       | NA | NA | NA | NA |
| -0.03 | 0.05  | -0.02 | 0.02  | 0.4  | 0.22     | 0.24     | 0.39     | NA | NA | NA | NA |
| 0.02  | 0.03  | -0.03 | -0.02 | 0.42 | 0.24     | 0.074    | 0.21     | NA | NA | NA | NA |
| 0.04  | -0.09 | -0.09 | -0.03 | 0.42 | 0.0013   | 4.60E-07 | 0.2      | NA | NA | NA | NA |
| -0.02 | 0.06  | 0.02  | 0.06  | 0.42 | 0.03     | 0.31     | 6.70E-05 | NA | NA | NA | NA |
| 0.57  | 0.57  | -0.17 | -0.13 | 0.42 | 0.044    | 0.11     | 0.15     | NA | NA | NA | NA |
| 0.01  | 0.06  | 0.02  | -0.04 | 0.43 | 0.00062  | 0.11     | 0.012    | NA | NA | NA | NA |
| 0.04  | 0.01  | 0     | 0.01  | 0.43 | 0.79     | 1        | 0.59     | NA | NA | NA | NA |
| 0.02  | 0.1   | -0.02 | 0.01  | 0.43 | 7.80E-05 | 0.044    | 0.53     | NA | NA | NA | NA |
| 0.03  | -0.03 | -0.03 | 0     | 0.44 | 0.22     | 0.0066   | 0.77     | NA | NA | NA | NA |
| 0.05  | -0.02 | -0.04 | -0.05 | 0.45 | 0.74     | 0.07     | 0.022    | NA | NA | NA | NA |
| 0.01  | 0.02  | -0.07 | 0.04  | 0.45 | 0.15     | 1.10E-07 | 0.015    | NA | NA | NA | NA |
| 0.03  | 0     | 0     | 0.04  | 0.45 | 1        | 1        | 0.0051   | NA | NA | NA | NA |
| -0.03 | 0.01  | -0.01 | 0.01  | 0.45 | 0.81     | 0.42     | 0.45     | NA | NA | NA | NA |
| 0.04  | -0.03 | -0.02 | -0.04 | 0.45 | 0.25     | 0.32     | 0.00077  | NA | NA | NA | NA |
| -0.02 | -0.04 | -0.01 | 0.04  | 0.46 | 0.39     | 0.63     | 0.032    | NA | NA | NA | NA |
| 0.04  | 0.04  | -0.06 | 0.01  | 0.46 | 0.15     | 0.03     | 0.84     | NA | NA | NA | NA |
| -0.83 | -0.75 | 0.19  | -0.01 | 0.47 | 0.66     | 0.15     | 1        | NA | NA | NA | NA |
| 0.03  | 0.03  | -0.05 | -0.03 | 0.48 | 0.21     | 0.02     | 0.19     | NA | NA | NA | NA |
| -0.02 | -0.02 | -0.03 | 0.03  | 0.48 | 0.39     | 0.016    | 0.03     | NA | NA | NA | NA |
| -0.11 | 0.05  | 0.02  | 0.01  | 0.49 | 0.9      | 0.48     | 0.8      | NA | NA | NA | NA |
| 0.02  | 0.09  | -0.05 | 0     | 0.49 | 0.014    | 0.00013  | 0.82     | NA | NA | NA | NA |
| 0.05  | 0.02  | -0.04 | -0.03 | 0.49 | 0.34     | 0.028    | 0.36     | NA | NA | NA | NA |
| 0.02  | 0.01  | 0     | 0.01  | 0.49 | 0.75     | 0.74     | 0.58     | NA | NA | NA | NA |
| 0.02  | -0.01 | -0.02 | 0.01  | 0.5  | 0.85     | 0.31     | 0.59     | NA | NA | NA | NA |
| -0.05 | -0.07 | -0.03 | 0.02  | 0.51 | 0.69     | 0.37     | 0.63     | NA | NA | NA | NA |
| 0.02  | 0.01  | -0.07 | -0.03 | 0.51 | 0.63     | 4.60E-07 | 0.045    | NA | NA | NA | NA |
| -0.03 | -0.01 | -0.04 | 0     | 0.51 | 0.97     | 0.0048   | 0.88     | NA | NA | NA | NA |

|       |       |       |       |      |          |         |          |    |    |    |    |
|-------|-------|-------|-------|------|----------|---------|----------|----|----|----|----|
| 0.1   | -0.05 | -0.05 | -0.01 | 0.53 | 0.27     | 0.0092  | 0.66     | NA | NA | NA | NA |
| 0.78  | -0.06 | 0     | 0.21  | 0.54 | 0.83     | 0.99    | 4.90E-06 | NA | NA | NA | NA |
| 0.06  | 0.07  | 0     | -0.05 | 0.54 | 0.51     | 1       | 0.011    | NA | NA | NA | NA |
| -0.08 | -0.27 | -0.1  | 0.02  | 0.55 | 0.00063  | 0.00064 | 0.64     | NA | NA | NA | NA |
| -0.14 | -0.06 | -0.03 | 0.02  | 0.55 | 0.71     | 0.22    | 0.65     | NA | NA | NA | NA |
| 0.01  | 0.06  | -0.02 | 0.04  | 0.56 | 0.0058   | 0.023   | 0.0012   | NA | NA | NA | NA |
| -0.38 | NA    | -0.15 | NA    | 0.56 | NA       | 0.15    | NA       | NA | NA | NA | NA |
| 0.03  | 0.02  | -0.03 | -0.03 | 0.56 | 0.57     | 0.13    | 0.1      | NA | NA | NA | NA |
| 0.02  | 0.03  | -0.03 | 0.03  | 0.57 | 0.34     | 0.037   | 0.14     | NA | NA | NA | NA |
| 0.18  | -0.04 | -0.01 | 0.05  | 0.58 | 1        | 0.87    | 0.087    | NA | NA | NA | NA |
| -0.02 | -0.01 | 0.01  | 0.02  | 0.58 | 0.88     | 0.42    | 0.11     | NA | NA | NA | NA |
| 0.02  | 0     | -0.02 | 0.03  | 0.58 | 0.89     | 0.071   | 0.01     | NA | NA | NA | NA |
| 0.8   | NA    | 0     | -0.05 | 0.59 | NA       | 1       | 0.41     | NA | NA | NA | NA |
| 0.02  | 0.06  | 0     | 0     | 0.6  | 0.012    | 0.8     | 0.94     | NA | NA | NA | NA |
| 0.04  | 0.11  | -0.02 | 0.02  | 0.61 | 0.0074   | 0.1     | 0.23     | NA | NA | NA | NA |
| 0.06  | -0.05 | 0.08  | 0.05  | 0.61 | 0.82     | 0.0038  | 0.064    | NA | NA | NA | NA |
| 0.04  | 0.3   | -0.06 | 0.07  | 0.62 | 6.00E-06 | 0.0017  | 0.0037   | NA | NA | NA | NA |
| 0.01  | -0.01 | -0.02 | 0.02  | 0.62 | 0.78     | 0.037   | 0.084    | NA | NA | NA | NA |
| 0.02  | 0.02  | -0.04 | 0.03  | 0.63 | 0.48     | 0.00074 | 0.022    | NA | NA | NA | NA |
| 0.05  | -0.01 | -0.03 | 0.02  | 0.64 | 1        | 0.44    | 0.59     | NA | NA | NA | NA |
| -0.01 | 0.03  | -0.04 | -0.02 | 0.65 | 0.34     | 0.024   | 0.39     | NA | NA | NA | NA |
| 0.02  | 0.11  | -0.04 | 0     | 0.65 | 0.00016  | 0.011   | 0.81     | NA | NA | NA | NA |
| 0.36  | 0.02  | 0     | 0.01  | 0.66 | 0.91     | 1       | 0.83     | NA | NA | NA | NA |
| 0.15  | 0.14  | 0     | 0.03  | 0.67 | 0.58     | 1       | 0.55     | NA | NA | NA | NA |
| -0.02 | 0.02  | -0.01 | 0.03  | 0.67 | 0.59     | 0.52    | 0.18     | NA | NA | NA | NA |
| 0.04  | 0.08  | 0.08  | 0.25  | 0.68 | 0.29     | 0.096   | 1.10E-07 | NA | NA | NA | NA |
| -0.03 | -0.06 | -0.02 | -0.01 | 0.68 | 0.43     | 0.37    | 0.54     | NA | NA | NA | NA |
| 0.02  | 0.02  | 0     | -0.02 | 0.69 | 0.56     | 0.89    | 0.24     | NA | NA | NA | NA |
| 0.02  | -0.02 | -0.02 | 0.03  | 0.7  | 0.72     | 0.58    | 0.31     | NA | NA | NA | NA |
| 0.05  | 0.06  | 0.04  | 0.01  | 0.7  | 0.49     | 0.047   | 0.66     | NA | NA | NA | NA |



|       |       |       |       |      |          |          |          |    |    |    |    |
|-------|-------|-------|-------|------|----------|----------|----------|----|----|----|----|
| 0.01  | 0.03  | -0.04 | 0.01  | 0.7  | 0.24     | 0.0063   | 0.48     | NA | NA | NA | NA |
| 0.07  | 0.24  | 0.03  | 0.04  | 0.71 | 0.036    | 0.48     | 0.36     | NA | NA | NA | NA |
| -0.03 | -0.08 | -0.01 | 0.06  | 0.71 | 0.082    | 0.77     | 0.00083  | NA | NA | NA | NA |
| 0.04  | -0.01 | -0.03 | 0.02  | 0.71 | 1        | 0.44     | 0.66     | NA | NA | NA | NA |
| 0.02  | 0.05  | -0.12 | -0.12 | 0.71 | 0.072    | 0.00043  | 2.50E-05 | NA | NA | NA | NA |
| 0.11  | -0.11 | 0.05  | 0.07  | 0.71 | 0.28     | 0.15     | 0.19     | NA | NA | NA | NA |
| -0.01 | 0.09  | -0.03 | 0.03  | 0.72 | 0.014    | 0.11     | 0.082    | NA | NA | NA | NA |
| 0.02  | 0.02  | -0.11 | 0.06  | 0.72 | 0.54     | 1.10E-07 | 0.11     | NA | NA | NA | NA |
| -0.08 | 0.12  | 0.09  | 0.1   | 0.73 | 0.71     | 0.14     | 0.028    | NA | NA | NA | NA |
| 0.13  | -0.04 | -0.16 | -0.08 | 0.74 | 1        | 2.60E-05 | 0.012    | NA | NA | NA | NA |
| -0.07 | -0.03 | -0.01 | 0.05  | 0.74 | 0.8      | 0.73     | 0.24     | NA | NA | NA | NA |
| 0.06  | 0     | -0.04 | -0.06 | 0.75 | 1        | 0.7      | 0.35     | NA | NA | NA | NA |
| 0.05  | 0     | -0.02 | 0.02  | 0.76 | 1        | 0.54     | 0.48     | NA | NA | NA | NA |
| 0.1   | 0.02  | 0.02  | 0.1   | 0.77 | 1        | 0.52     | 0.025    | NA | NA | NA | NA |
| 0.26  | 0.14  | -0.07 | -0.07 | 0.77 | 0.44     | 0.11     | 0.075    | NA | NA | NA | NA |
| 0.05  | 0.38  | -0.12 | 0.38  | 0.78 | 0.0037   | 0.2      | 0.011    | NA | NA | NA | NA |
| 0.01  | 0     | -0.05 | -0.05 | 0.78 | 1        | 0.0028   | 0.0097   | NA | NA | NA | NA |
| -0.13 | 0.07  | 0.04  | 0.08  | 0.78 | 0.67     | 0.36     | 0.023    | NA | NA | NA | NA |
| -0.03 | 0.01  | 0.02  | 0.02  | 0.78 | 0.85     | 0.19     | 0.2      | NA | NA | NA | NA |
| 0.01  | 0.03  | -0.01 | 0.12  | 0.79 | 0.29     | 0.5      | 1.40E-08 | NA | NA | NA | NA |
| 0.03  | 0.06  | -0.09 | 0     | 0.79 | 0.39     | 2.10E-07 | 0.98     | NA | NA | NA | NA |
| 0.01  | 0     | -0.05 | -0.01 | 0.8  | 1        | 0.017    | 0.7      | NA | NA | NA | NA |
| 0.02  | 0.02  | -0.04 | 0.01  | 0.81 | 0.6      | 0.02     | 0.66     | NA | NA | NA | NA |
| 0.01  | 0.11  | 0.01  | 0.08  | 0.82 | 0.022    | 0.65     | 2.80E-05 | NA | NA | NA | NA |
| -0.06 | 0.07  | -0.06 | -0.01 | 0.83 | 0.38     | 0.0044   | 0.74     | NA | NA | NA | NA |
| -0.04 | -0.1  | -0.08 | -0.06 | 0.84 | 0.65     | 0.0033   | 0.043    | NA | NA | NA | NA |
| 0     | 0.05  | -0.03 | -0.03 | 0.85 | 0.0063   | 0.014    | 0.015    | NA | NA | NA | NA |
| 0.01  | -0.03 | 0     | 0.02  | 0.86 | 0.2      | 0.89     | 0.14     | NA | NA | NA | NA |
| 0.05  | 0.29  | -0.02 | 0.05  | 0.86 | 1.20E-09 | 0.31     | 0.049    | NA | NA | NA | NA |
| -0.01 | 0.11  | -0.13 | -0.09 | 0.87 | 0.069    | 1.10E-07 | 3.50E-06 | NA | NA | NA | NA |

|       |       |       |       |      |          |          |          |    |    |    |    |
|-------|-------|-------|-------|------|----------|----------|----------|----|----|----|----|
| -0.01 | 0     | 0.01  | 0.05  | 0.88 | 1        | 0.67     | 0.00088  | NA | NA | NA | NA |
| 0.01  | 0.02  | -0.06 | 0.01  | 0.89 | 0.57     | 2.20E-06 | 0.31     | NA | NA | NA | NA |
| 0.07  | 0.04  | -0.04 | 0.12  | 0.89 | 0.8      | 0.28     | 0.004    | NA | NA | NA | NA |
| 0     | 0.07  | -0.02 | 0.02  | 0.89 | 0.0029   | 0.061    | 0.12     | NA | NA | NA | NA |
| -0.01 | 0.05  | 0.02  | 0.03  | 0.9  | 0.14     | 0.38     | 0.11     | NA | NA | NA | NA |
| 0.01  | 0.12  | -0.06 | 0.02  | 0.91 | 0.0013   | 0.0029   | 0.51     | NA | NA | NA | NA |
| -0.01 | 0.17  | -0.05 | 0.05  | 0.91 | 0.0014   | 0.0015   | 0.033    | NA | NA | NA | NA |
| 0.01  | -0.01 | -0.07 | -0.01 | 0.92 | 0.9      | 6.00E-05 | 0.5      | NA | NA | NA | NA |
| -0.01 | 0.14  | -0.02 | -0.02 | 0.92 | 1.90E-05 | 0.22     | 0.12     | NA | NA | NA | NA |
| -0.03 | 0     | 0.04  | 0.11  | 0.92 | 1        | 0.3      | 0.0043   | NA | NA | NA | NA |
| -0.01 | 0.07  | -0.06 | -0.02 | 0.93 | 0.0066   | 0.00026  | 0.23     | NA | NA | NA | NA |
| 0     | 0.01  | -0.04 | 0.02  | 0.93 | 0.92     | 0.00052  | 0.15     | NA | NA | NA | NA |
| 0     | 0.04  | -0.01 | 0.04  | 0.95 | 0.066    | 0.49     | 0.0013   | NA | NA | NA | NA |
| -0.01 | 0.08  | 0.01  | -0.11 | 0.95 | 0.024    | 0.96     | 1.10E-05 | NA | NA | NA | NA |
| 0.01  | 0.07  | -0.08 | -0.04 | 0.95 | 0.026    | 1.90E-05 | 0.064    | NA | NA | NA | NA |
| 0.02  | 0.38  | 0.05  | 0.02  | 0.95 | 0.61     | 0.5      | 0.74     | NA | NA | NA | NA |
| 0.02  | -0.01 | 0.04  | -0.06 | 0.96 | 1        | 0.29     | 0.28     | NA | NA | NA | NA |
| 0.01  | -0.01 | -0.06 | -0.01 | 0.96 | 1        | 0.00046  | 0.67     | NA | NA | NA | NA |
| 0.03  | 0.12  | -0.06 | -0.08 | 0.96 | 0.061    | 0.058    | 0.0057   | NA | NA | NA | NA |
| 0     | 0.03  | -0.03 | -0.05 | 0.96 | 0.53     | 0.17     | 0.026    | NA | NA | NA | NA |
| 0.01  | 0     | 0     | 0.07  | 0.96 | 0.91     | 0.99     | 0.00045  | NA | NA | NA | NA |
| -0.01 | 0.03  | -0.05 | 0.05  | 0.97 | 0.29     | 0.0011   | 0.0042   | NA | NA | NA | NA |
| 0.05  | 0.14  | -0.06 | 0.06  | 0.97 | 0.025    | 0.067    | 0.19     | NA | NA | NA | NA |
| 0.09  | 0.43  | -0.13 | -0.07 | 0.98 | 0.4      | 3.00E-04 | 0.12     | NA | NA | NA | NA |
| 0     | 0.02  | 0.01  | 0.07  | 0.98 | 0.44     | 0.66     | 3.20E-07 | NA | NA | NA | NA |
| 0.04  | 0.02  | 0     | -0.02 | 0.98 | 1        | 1        | 0.44     | NA | NA | NA | NA |
| -0.08 | NA    | -0.01 | -0.09 | 0.99 | NA       | 0.89     | 0.0087   | NA | NA | NA | NA |
| 0.02  | 0.09  | -0.01 | -0.04 | 1    | 0.88     | 0.92     | 0.25     | NA | NA | NA | NA |
| 0.04  | 0.13  | -0.07 | 0.02  | 1    | 0.052    | 0.00016  | 0.44     | NA | NA | NA | NA |
| -0.67 | NA    | -0.15 | -0.02 | 1    | NA       | 0.00052  | 0.92     | NA | NA | NA | NA |

|       |       |       |       |   |       |          |          |    |    |    |    |
|-------|-------|-------|-------|---|-------|----------|----------|----|----|----|----|
| -0.07 | 0.33  | 0.03  | -0.24 | 1 | 0.35  | 1        | 0.14     | NA | NA | NA | NA |
| 0.04  | 0.04  | 0.15  | 0.15  | 1 | 0.72  | 0.32     | 0.15     | NA | NA | NA | NA |
| 0.14  | -0.75 | 0.57  | 0.57  | 1 | 0.013 | 0.029    | 0.9      | NA | NA | NA | NA |
| -0.01 | -0.03 | -0.07 | -0.03 | 1 | 1     | 0.011    | 0.27     | NA | NA | NA | NA |
| -0.03 | 0.01  | -0.12 | -0.07 | 1 | 1     | 0.0068   | 0.12     | NA | NA | NA | NA |
| 0.5   | NA    | 0     | NA    | 1 | NA    | 1        | NA       | NA | NA | NA | NA |
| 0     | NA    | -0.19 | -0.11 | 1 | NA    | 0.077    | 0.29     | NA | NA | NA | NA |
| 0     | 0.08  | -0.02 | 0.08  | 1 | 1     | 0.52     | 0.028    | NA | NA | NA | NA |
| 0     | 0     | -0.07 | -0.02 | 1 | 1     | 0.36     | 0.92     | NA | NA | NA | NA |
| 0     | -0.04 | -0.08 | -0.03 | 1 | 0.34  | 0.0067   | 0.22     | NA | NA | NA | NA |
| -0.01 | -0.11 | 0.24  | 0.44  | 1 | 1     | 9.50E-05 | 1.30E-09 | NA | NA | NA | NA |
| -0.01 | 0.04  | -0.02 | 0.05  | 1 | 0.9   | 0.42     | 0.13     | NA | NA | NA | NA |
| 0.1   | 0.01  | 0.01  | 0     | 1 | 1     | 0.88     | 1        | NA | NA | NA | NA |
| 0.01  | 0     | -0.01 | -0.02 | 1 | 1     | 0.93     | 0.59     | NA | NA | NA | NA |
| 0     | 0.06  | -0.06 | -0.02 | 1 | 0.28  | 0.02     | 0.54     | NA | NA | NA | NA |
| 0.02  | 0.3   | -0.13 | -0.14 | 1 | 0.28  | 7.00E-04 | 0.01     | NA | NA | NA | NA |
| 0.05  | 0.03  | -0.06 | 0.07  | 1 | 1     | 0.019    | 0.047    | NA | NA | NA | NA |
| 0.02  | -0.13 | -0.14 | -0.06 | 1 | 0.26  | 1.30E-07 | 0.024    | NA | NA | NA | NA |
| -0.01 | 0.07  | 0.01  | -0.01 | 1 | 0.39  | 0.71     | 0.58     | NA | NA | NA | NA |
| -0.01 | 0.07  | -0.02 | 0     | 1 | 0.41  | 0.57     | 0.9      | NA | NA | NA | NA |
| -0.02 | 0.14  | -0.11 | 0.03  | 1 | 0.67  | 0.079    | 1        | NA | NA | NA | NA |
| -0.01 | -0.03 | -0.05 | -0.06 | 1 | 0.84  | 0.28     | 0.18     | NA | NA | NA | NA |
| 0.09  | -0.1  | -0.17 | -0.1  | 1 | 0.74  | 0.083    | 0.63     | NA | NA | NA | NA |
| 0.05  | -0.02 | -0.02 | -0.06 | 1 | 1     | 0.49     | 0.019    | NA | NA | NA | NA |
| -0.01 | NA    | -0.17 | -0.05 | 1 | NA    | 0.048    | 0.63     | NA | NA | NA | NA |
| 0.03  | -0.06 | -0.05 | 0.08  | 1 | 0.6   | 0.21     | 0.031    | NA | NA | NA | NA |
| 0.01  | 0.37  | -0.11 | -0.02 | 1 | 0.037 | 1.50E-05 | 0.7      | NA | NA | NA | NA |
| -0.01 | 0.05  | 0.02  | 0.03  | 1 | 0.73  | 0.8      | 0.59     | NA | NA | NA | NA |
| 0.03  | 0.04  | -0.04 | 0.02  | 1 | 1     | 0.15     | 0.72     | NA | NA | NA | NA |
| 0.01  | 0.02  | -0.03 | 0     | 1 | 0.8   | 0.11     | 1        | NA | NA | NA | NA |

|       |       |       |       |    |          |         |          |    |    |    |    |
|-------|-------|-------|-------|----|----------|---------|----------|----|----|----|----|
| 0.04  | 0.01  | -0.05 | 0.04  | 1  | 1        | 0.098   | 0.47     | NA | NA | NA | NA |
| 0     | 0.01  | -0.03 | 0.06  | 1  | 0.92     | 0.13    | 0.0048   | NA | NA | NA | NA |
| -0.01 | 0.23  | 0     | 0.04  | 1  | 0.00011  | 0.94    | 0.19     | NA | NA | NA | NA |
| 0.1   | NA    | 0.03  | 0.13  | 1  | NA       | 0.65    | 0.054    | NA | NA | NA | NA |
| -0.01 | -0.03 | 0.01  | 0.09  | 1  | 1        | 0.72    | 0.0095   | NA | NA | NA | NA |
| 0     | -0.1  | -0.01 | 0.11  | 1  | 0.13     | 0.76    | 3.50E-09 | NA | NA | NA | NA |
| 0.01  | 0.3   | -0.04 | 0.03  | 1  | 3.80E-06 | 0.16    | 0.4      | NA | NA | NA | NA |
| 0.03  | 0.13  | 0     | 0.01  | 1  | 0.093    | 1       | 0.93     | NA | NA | NA | NA |
| 0.02  | 0.08  | -0.06 | -0.05 | 1  | 0.23     | 0.0057  | 0.032    | NA | NA | NA | NA |
| 0.01  | 0.12  | 0.02  | 0.05  | 1  | 0.00027  | 0.36    | 0.033    | NA | NA | NA | NA |
| -0.02 | 0.31  | -0.08 | 0.02  | 1  | 0.68     | 0.39    | 0.96     | NA | NA | NA | NA |
| 0.02  | 0.28  | -0.12 | -0.1  | 1  | 0.014    | 0.00081 | 0.0018   | NA | NA | NA | NA |
| -0.11 | -0.12 | -0.07 | 0     | 1  | 1        | 0.27    | 1        | NA | NA | NA | NA |
| 0.06  | 0.83  | 0.01  | 0.88  | 1  | 0.61     | 1       | 0.00011  | NA | NA | NA | NA |
| 0.02  | 0.14  | 0.01  | 0.08  | 1  | 0.95     | 0.73    | 0.052    | NA | NA | NA | NA |
| 0.01  | 0.1   | -0.06 | -0.05 | 1  | 0.2      | 0.027   | 0.085    | NA | NA | NA | NA |
| 0     | -0.02 | 0     | 0.02  | 1  | 0.72     | 1       | 0.18     | NA | NA | NA | NA |
| -0.02 | -0.03 | -0.01 | 0     | 1  | 0.9      | 1       | 1        | NA | NA | NA | NA |
| -0.01 | 0.07  | 0.04  | -0.03 | 1  | 0.76     | 0.51    | 0.6      | NA | NA | NA | NA |
| 0.05  | 0.06  | -0.01 | 0.09  | 1  | 0.85     | 0.75    | 0.05     | NA | NA | NA | NA |
| 0.01  | 0     | -0.01 | -0.01 | 1  | 1        | 0.68    | 0.56     | NA | NA | NA | NA |
| 0.03  | 0.17  | 0.02  | 0     | 1  | 0.048    | 0.57    | 1        | NA | NA | NA | NA |
| NA    | NA    | 0.04  | -0.26 | NA | NA       | 1       | 0.53     | NA | NA | NA | NA |
| NA    | -0.44 | -0.09 | 0.25  | NA | 0.031    | 0.13    | 0.079    | NA | NA | NA | NA |
| NA    | NA    | -0.06 | -0.05 | NA | NA       | 0.33    | 0.68     | NA | NA | NA | NA |
| NA    | NA    | NA    | NA    | NA | NA       | NA      | NA       | NA | NA | NA | NA |
| NA    | NA    | -0.29 | -0.18 | NA | NA       | 0.00048 | 0.038    | NA | NA | NA | NA |
| NA    | NA    | -0.19 | 0.1   | NA | NA       | 0.047   | 0.9      | NA | NA | NA | NA |
| NA    | 0.23  | -0.03 | 0.12  | NA | 0.0094   | 0.37    | 0.045    | NA | NA | NA | NA |
| NA    | 0.19  | -0.07 | 0.33  | NA | 1        | 0.79    | 0.35     | NA | NA | NA | NA |

|    |       |       |       |    |    |        |        |    |    |    |    |
|----|-------|-------|-------|----|----|--------|--------|----|----|----|----|
| NA | NA    | NA    | NA    | NA | NA | NA     | NA     | NA | NA | NA | NA |
| NA | NA    | -0.01 | 0.06  | NA | NA | 1      | 0.37   | NA | NA | NA | NA |
| NA | NA    | NA    | NA    | NA | NA | NA     | NA     | NA | NA | NA | NA |
| NA | NA    | -0.75 | NA    | NA | NA | 0.015  | NA     | NA | NA | NA | NA |
| NA | NA    | 0     | NA    | NA | NA | 1      | NA     | NA | NA | NA | NA |
| NA | NA    | 0.17  | NA    | NA | NA | 0.15   | NA     | NA | NA | NA | NA |
| NA | NA    | NA    | NA    | NA | NA | NA     | NA     | NA | NA | NA | NA |
| NA | NA    | 0.02  | -0.01 | NA | NA | 0.96   | 0.84   | NA | NA | NA | NA |
| NA | NA    | NA    | NA    | NA | NA | NA     | NA     | NA | NA | NA | NA |
| NA | NA    | NA    | NA    | NA | NA | NA     | NA     | NA | NA | NA | NA |
| NA | NA    | NA    | NA    | NA | NA | NA     | NA     | NA | NA | NA | NA |
| NA | NA    | 0.54  | 0.92  | NA | NA | 0.0066 | 0.23   | NA | NA | NA | NA |
| NA | NA    | NA    | NA    | NA | NA | NA     | NA     | NA | NA | NA | NA |
| NA | NA    | -0.15 | NA    | NA | NA | 0.69   | NA     | NA | NA | NA | NA |
| NA | 0.03  | -0.04 | 0.27  | NA | 1  | 0.77   | 0.35   | NA | NA | NA | NA |
| NA | NA    | NA    | NA    | NA | NA | NA     | NA     | NA | NA | NA | NA |
| NA | NA    | 0.18  | 0.82  | NA | NA | 0.2    | 0.061  | NA | NA | NA | NA |
| NA | NA    | -0.1  | -0.16 | NA | NA | 0.28   | 0.0071 | NA | NA | NA | NA |
| NA | NA    | NA    | NA    | NA | NA | NA     | NA     | NA | NA | NA | NA |
| NA | NA    | NA    | 0.03  | NA | NA | NA     | 0.95   | NA | NA | NA | NA |
| NA | 0.02  | -0.13 | NA    | NA | 1  | 0.097  | NA     | NA | NA | NA | NA |
| NA | NA    | NA    | NA    | NA | NA | NA     | NA     | NA | NA | NA | NA |
| NA | NA    | -0.04 | 0.36  | NA | NA | 1      | 0.038  | NA | NA | NA | NA |
| NA | 0.03  | -0.08 | 0.7   | NA | 1  | 0.72   | 0.058  | NA | NA | NA | NA |
| NA | NA    | 0.03  | 0.1   | NA | NA | 1      | 0.89   | NA | NA | NA | NA |
| NA | NA    | NA    | NA    | NA | NA | NA     | NA     | NA | NA | NA | NA |
| NA | NA    | NA    | NA    | NA | NA | NA     | NA     | NA | NA | NA | NA |
| NA | NA    | NA    | NA    | NA | NA | NA     | NA     | NA | NA | NA | NA |
| NA | NA    | NA    | NA    | NA | NA | NA     | NA     | NA | NA | NA | NA |
| NA | -0.01 | -0.14 | -0.07 | NA | 1  | 0.0041 | 0.27   | NA | NA | NA | NA |

|    |      |       |       |    |         |          |          |    |    |    |    |
|----|------|-------|-------|----|---------|----------|----------|----|----|----|----|
| NA | NA   | -0.05 | 0.15  | NA | NA      | 0.23     | 6.00E-04 | NA | NA | NA | NA |
| NA | NA   | NA    | 0.44  | NA | NA      | NA       | 0.48     | NA | NA | NA | NA |
| NA | NA   | 0.52  | NA    | NA | NA      | 1        | NA       | NA | NA | NA | NA |
| NA | NA   | NA    | NA    | NA | NA      | NA       | NA       | NA | NA | NA | NA |
| NA | 0.87 | -0.06 | 0.04  | NA | 0.41    | 0.044    | 0.35     | NA | NA | NA | NA |
| NA | 0.29 | -0.05 | 0.06  | NA | 0.29    | 0.44     | 0.49     | NA | NA | NA | NA |
| NA | NA   | -0.25 | NA    | NA | NA      | 0.83     | NA       | NA | NA | NA | NA |
| NA | NA   | -0.1  | -0.08 | NA | NA      | 0.97     | 0.75     | NA | NA | NA | NA |
| NA | NA   | 0.01  | -0.04 | NA | NA      | 1        | 0.35     | NA | NA | NA | NA |
| NA | NA   | 0.25  | NA    | NA | NA      | 0.32     | NA       | NA | NA | NA | NA |
| NA | NA   | NA    | NA    | NA | NA      | NA       | NA       | NA | NA | NA | NA |
| NA | NA   | -0.03 | 0.06  | NA | NA      | 0.49     | 0.32     | NA | NA | NA | NA |
| NA | NA   | 0.1   | NA    | NA | NA      | 0.49     | NA       | NA | NA | NA | NA |
| NA | 0.33 | -0.17 | -0.04 | NA | 0.47    | 0.013    | 0.56     | NA | NA | NA | NA |
| NA | NA   | 0.07  | NA    | NA | NA      | 1        | NA       | NA | NA | NA | NA |
| NA | NA   | NA    | NA    | NA | NA      | NA       | NA       | NA | NA | NA | NA |
| NA | 0.57 | -0.13 | -0.11 | NA | 0.0072  | 3.20E-05 | 0.015    | NA | NA | NA | NA |
| NA | NA   | 0.03  | 0.05  | NA | NA      | 0.65     | 0.56     | NA | NA | NA | NA |
| NA | 0.24 | -0.04 | 0.07  | NA | 0.063   | 0.42     | 0.59     | NA | NA | NA | NA |
| NA | NA   | NA    | NA    | NA | NA      | NA       | NA       | NA | NA | NA | NA |
| NA | NA   | -0.67 | NA    | NA | NA      | 1        | NA       | NA | NA | NA | NA |
| NA | 0.21 | -0.03 | -0.04 | NA | 0.00013 | 0.5      | 0.18     | NA | NA | NA | NA |
| NA | NA   | -0.12 | NA    | NA | NA      | 0.27     | NA       | NA | NA | NA | NA |
| NA | NA   | NA    | NA    | NA | NA      | NA       | NA       | NA | NA | NA | NA |
| NA | NA   | NA    | NA    | NA | NA      | NA       | NA       | NA | NA | NA | NA |
| NA | NA   | -0.01 | 0     | NA | NA      | 1        | 1        | NA | NA | NA | NA |
| NA | NA   | 0.04  | NA    | NA | NA      | 1        | NA       | NA | NA | NA | NA |
| NA | 0.85 | -0.26 | -0.18 | NA | 0.00042 | 1.70E-08 | 0.0046   | NA | NA | NA | NA |
| NA | NA   | NA    | -0.03 | NA | NA      | NA       | 1        | NA | NA | NA | NA |
| NA | 0.79 | -0.13 | 0.16  | NA | 0.15    | 0.62     | 0.6      | NA | NA | NA | NA |

|       |       |       |       |          |          |          |          |    |    |    |    |
|-------|-------|-------|-------|----------|----------|----------|----------|----|----|----|----|
| NA    | 0.09  | 0.16  | 0.02  | NA       | 1        | 0.038    | 0.83     | NA | NA | NA | NA |
| NA    | -0.35 | -0.03 | 0.01  | NA       | 0.45     | 0.48     | 0.98     | NA | NA | NA | NA |
| NA    | 0.26  | 0     | -0.03 | NA       | 0.11     | 1        | 0.58     | NA | NA | NA | NA |
| NA    | NA    | 0.03  | 0.12  | NA       | NA       | 0.66     | 0.14     | NA | NA | NA | NA |
| 0.28  | 0.17  | -0.04 | -0.01 | 1.30E-09 | 5.00E-07 | 0.0056   | 0.38     | NA | NA | NA | NA |
| 0.71  | -0.12 | 0     | 0.08  | 4.80E-09 | 0.086    | 0.96     | 0.0075   | NA | NA | NA | NA |
| 0.1   | 0.08  | -0.03 | -0.03 | 1.40E-08 | 6.20E-09 | 0.0018   | 0.0054   | NA | NA | NA | NA |
| 0.29  | 0.13  | -0.05 | -0.09 | 2.10E-08 | 0.00056  | 0.05     | 0.00045  | NA | NA | NA | NA |
| 0.13  | 0.11  | -0.07 | -0.04 | 4.30E-08 | 1.00E-07 | 2.10E-06 | 0.011    | NA | NA | NA | NA |
| 0.12  | 0.06  | -0.07 | -0.03 | 9.30E-08 | 0.0016   | 2.90E-08 | 0.015    | NA | NA | NA | NA |
| 0.38  | 0.07  | -0.05 | -0.09 | 1.50E-07 | 0.42     | 0.14     | 8.10E-06 | NA | NA | NA | NA |
| 0.22  | 0.25  | -0.03 | 0     | 4.60E-07 | 1.90E-06 | 0.018    | 0.82     | NA | NA | NA | NA |
| 0.13  | 0.11  | -0.02 | 0     | 4.80E-07 | 2.40E-07 | 0.2      | 0.95     | NA | NA | NA | NA |
| 0.35  | 0.28  | -0.02 | 0.08  | 6.50E-07 | 2.60E-06 | 0.44     | 0.00084  | NA | NA | NA | NA |
| 0.66  | 0.12  | -0.1  | -0.03 | 1.20E-06 | 0.045    | 0.014    | 0.65     | NA | NA | NA | NA |
| 0.09  | 0.03  | -0.04 | -0.01 | 1.30E-06 | 0.012    | 3.80E-05 | 0.21     | NA | NA | NA | NA |
| 0.18  | 0.06  | -0.02 | 0     | 1.80E-06 | 0.0049   | 0.035    | 0.83     | NA | NA | NA | NA |
| 0.15  | 0.06  | -0.07 | -0.02 | 3.50E-06 | 0.0098   | 2.10E-09 | 0.026    | NA | NA | NA | NA |
| 0.14  | 0.05  | -0.05 | -0.03 | 3.80E-06 | 0.0057   | 0.00058  | 0.08     | NA | NA | NA | NA |
| 0.09  | 0.08  | -0.06 | -0.03 | 6.30E-06 | 1.70E-07 | 1.90E-09 | 0.0023   | NA | NA | NA | NA |
| 0.18  | 0.11  | -0.02 | -0.06 | 6.80E-06 | 0.0015   | 0.51     | 0.00022  | NA | NA | NA | NA |
| 0.21  | 0.11  | -0.06 | -0.02 | 7.70E-06 | 0.0064   | 0.0036   | 0.42     | NA | NA | NA | NA |
| 0.57  | 0.16  | 0.03  | 0     | 1.10E-05 | 0.0048   | 0.39     | 1        | NA | NA | NA | NA |
| -0.82 | -0.5  | -0.02 | 0.07  | 1.30E-05 | 0.043    | 0.5      | 0.027    | NA | NA | NA | NA |
| 0.09  | 0.05  | -0.04 | -0.03 | 1.50E-05 | 0.0016   | 0.00079  | 0.0013   | NA | NA | NA | NA |
| 0.15  | 0.12  | -0.04 | 0.01  | 1.50E-05 | 0.00013  | 0.0036   | 0.37     | NA | NA | NA | NA |
| 0.14  | 0.06  | -0.05 | -0.08 | 2.20E-05 | 0.026    | 0.0036   | 7.50E-07 | NA | NA | NA | NA |
| 0.95  | 0.04  | NA    | -0.04 | 2.50E-05 | 0.78     | NA       | 0.35     | NA | NA | NA | NA |
| 0.13  | 0.12  | -0.05 | -0.01 | 2.70E-05 | 5.10E-07 | 3.90E-05 | 0.47     | NA | NA | NA | NA |
| 0.16  | 0.01  | -0.03 | 0.02  | 3.10E-05 | 0.64     | 0.0051   | 0.12     | NA | NA | NA | NA |

|       |       |       |       |          |          |          |          |    |    |    |    |
|-------|-------|-------|-------|----------|----------|----------|----------|----|----|----|----|
| 0.08  | 0.14  | -0.05 | 0     | 8.00E-05 | 2.90E-09 | 4.00E-05 | 0.79     | NA | NA | NA | NA |
| 0.51  | 0.53  | -0.11 | 0.03  | 1.00E-04 | 0.00054  | 0.043    | 0.97     | NA | NA | NA | NA |
| 0.08  | 0.12  | -0.02 | 0.04  | 0.00011  | 1.20E-08 | 0.068    | 0.0018   | NA | NA | NA | NA |
| 0.08  | 0.12  | 0     | -0.01 | 0.00013  | 2.30E-06 | 1        | 0.72     | NA | NA | NA | NA |
| 0.17  | 0.18  | -0.01 | 0.02  | 0.00014  | 2.00E-04 | 0.94     | 0.7      | NA | NA | NA | NA |
| 0.22  | 0.04  | -0.02 | 0.04  | 0.00014  | 0.38     | 0.47     | 0.1      | NA | NA | NA | NA |
| 0.13  | 0.09  | -0.04 | 0.03  | 0.00017  | 0.007    | 0.0035   | 0.054    | NA | NA | NA | NA |
| 0.12  | 0.01  | -0.04 | 0.01  | 0.00023  | 0.61     | 0.00072  | 0.46     | NA | NA | NA | NA |
| 0.23  | 0.06  | -0.07 | -0.03 | 0.00024  | 0.18     | 0.0061   | 0.15     | NA | NA | NA | NA |
| 0.16  | 0.08  | 0     | -0.01 | 0.00027  | 0.0016   | 1        | 0.45     | NA | NA | NA | NA |
| 0.14  | 0.04  | 0     | -0.03 | 0.00049  | 0.25     | 1        | 0.1      | NA | NA | NA | NA |
| -0.78 | 0.1   | -0.27 | 0     | 5.00E-04 | 1        | 0.25     | 1        | NA | NA | NA | NA |
| 0.28  | 0.19  | -0.1  | -0.06 | 0.00089  | 0.00087  | 4.40E-05 | 0.0078   | NA | NA | NA | NA |
| 0.12  | 0.07  | 0.01  | -0.01 | 0.00092  | 0.0011   | 0.63     | 0.58     | NA | NA | NA | NA |
| 0.14  | 0.14  | -0.1  | -0.08 | 0.00097  | 4.70E-07 | 2.60E-07 | 3.30E-06 | NA | NA | NA | NA |
| 0.16  | 0.02  | -0.02 | 0     | 0.0011   | 0.31     | 0.12     | 0.91     | NA | NA | NA | NA |
| 0.19  | 0.06  | -0.07 | -0.01 | 0.0011   | 0.36     | 1.20E-05 | 0.77     | NA | NA | NA | NA |
| 0.23  | 0.13  | -0.02 | 0.02  | 0.0018   | 0.0021   | 0.22     | 0.25     | NA | NA | NA | NA |
| 0.18  | 0.23  | -0.05 | -0.06 | 0.0023   | 5.70E-06 | 0.024    | 0.0066   | NA | NA | NA | NA |
| 0.33  | 0.05  | 0.02  | -0.01 | 0.0024   | 0.53     | 0.55     | 0.76     | NA | NA | NA | NA |
| 0.07  | 0.1   | -0.01 | 0.03  | 0.0024   | 3.80E-06 | 0.35     | 0.0028   | NA | NA | NA | NA |
| -0.5  | NA    | -0.02 | 0.31  | 0.0024   | NA       | 1        | 0.061    | NA | NA | NA | NA |
| 0.32  | 0.03  | 0     | 0.07  | 0.0026   | 0.86     | 1        | 0.018    | NA | NA | NA | NA |
| 0.08  | 0.03  | -0.02 | 0.01  | 0.0028   | 0.064    | 0.014    | 0.32     | NA | NA | NA | NA |
| 0.08  | 0.05  | -0.02 | 0.03  | 0.0034   | 0.015    | 0.039    | 0.01     | NA | NA | NA | NA |
| 0.17  | 0.23  | -0.01 | 0     | 0.0034   | 3.20E-07 | 0.55     | 1        | NA | NA | NA | NA |
| 0.13  | 0.05  | -0.06 | -0.07 | 0.0036   | 0.041    | 0.0025   | 1.40E-05 | NA | NA | NA | NA |
| -0.16 | -0.02 | -0.04 | -0.02 | 0.0059   | 0.89     | 0.031    | 0.32     | NA | NA | NA | NA |
| 0.07  | 0.02  | -0.04 | -0.02 | 0.0061   | 0.15     | 0.0061   | 0.31     | NA | NA | NA | NA |
| -0.08 | -0.05 | -0.05 | -0.05 | 0.0065   | 0.21     | 0.0056   | 0.0028   | NA | NA | NA | NA |



|       |       |       |       |        |          |          |          |    |    |    |    |
|-------|-------|-------|-------|--------|----------|----------|----------|----|----|----|----|
| 0.13  | 0.05  | 0     | 0.04  | 0.0075 | 0.15     | 0.95     | 0.21     | NA | NA | NA | NA |
| 0.08  | 0.09  | -0.06 | 0     | 0.0075 | 0.0047   | 0.0046   | 0.91     | NA | NA | NA | NA |
| 0.09  | 0.2   | -0.06 | -0.06 | 0.008  | 3.00E-07 | 2.90E-06 | 4.50E-05 | NA | NA | NA | NA |
| 0.14  | 0.07  | -0.05 | -0.01 | 0.0095 | 0.18     | 0.012    | 0.41     | NA | NA | NA | NA |
| 0.21  | 0     | -0.04 | -0.02 | 0.01   | 1        | 0.056    | 0.25     | NA | NA | NA | NA |
| -0.16 | 0.03  | -0.06 | 0.04  | 0.011  | 0.79     | 0.0017   | 0.11     | NA | NA | NA | NA |
| 0.76  | 0.14  | -0.17 | -0.09 | 0.011  | 0.72     | 2.50E-07 | 0.0085   | NA | NA | NA | NA |
| 0.15  | 0.02  | 0.02  | 0.12  | 0.011  | 0.8      | 0.67     | 0.006    | NA | NA | NA | NA |
| 0.07  | 0.02  | -0.07 | -0.04 | 0.012  | 0.29     | 1.30E-06 | 0.0039   | NA | NA | NA | NA |
| 0.06  | 0.05  | -0.01 | 0.02  | 0.012  | 0.0079   | 0.28     | 0.071    | NA | NA | NA | NA |
| 0.06  | 0.04  | -0.01 | 0.01  | 0.013  | 0.087    | 0.37     | 0.4      | NA | NA | NA | NA |
| 0.64  | 0.24  | -0.06 | 0.08  | 0.015  | 0.059    | 0.077    | 0.24     | NA | NA | NA | NA |
| 0.17  | 0.18  | -0.04 | 0.1   | 0.015  | 0.034    | 0.1      | 0.015    | NA | NA | NA | NA |
| 0.1   | 0.02  | -0.03 | -0.01 | 0.015  | 0.57     | 0.18     | 0.65     | NA | NA | NA | NA |
| -0.11 | -0.03 | -0.15 | -0.11 | 0.016  | 0.61     | 3.40E-05 | 0.0026   | NA | NA | NA | NA |
| 0.11  | 0.05  | -0.14 | -0.07 | 0.016  | 0.077    | 2.70E-07 | 0.014    | NA | NA | NA | NA |
| 0.32  | 0.03  | -0.04 | -0.01 | 0.018  | 1        | 0.2      | 0.98     | NA | NA | NA | NA |
| 0.19  | -0.08 | -0.05 | -0.01 | 0.018  | 0.079    | 0.024    | 0.57     | NA | NA | NA | NA |
| 0.11  | 0.03  | -0.05 | -0.01 | 0.019  | 0.15     | 0.0057   | 0.65     | NA | NA | NA | NA |
| 0.21  | 0.03  | -0.1  | -0.08 | 0.019  | 0.7      | 0.00023  | 2.00E-04 | NA | NA | NA | NA |
| 0.09  | 0.01  | -0.01 | 0.08  | 0.019  | 0.69     | 0.65     | 3.20E-08 | NA | NA | NA | NA |
| 0.05  | 0.12  | -0.02 | 0.01  | 0.019  | 4.80E-08 | 0.035    | 0.47     | NA | NA | NA | NA |
| 0.07  | 0.12  | -0.05 | -0.01 | 0.019  | 8.90E-07 | 0.00014  | 0.43     | NA | NA | NA | NA |
| 0.12  | 0.03  | -0.07 | -0.03 | 0.021  | 0.35     | 0.031    | 0.39     | NA | NA | NA | NA |
| 0.07  | 0.06  | -0.08 | -0.02 | 0.022  | 0.013    | 2.10E-07 | 0.26     | NA | NA | NA | NA |
| 0.1   | -0.02 | -0.05 | -0.01 | 0.023  | 0.68     | 0.0035   | 0.5      | NA | NA | NA | NA |
| 0.06  | 0.04  | -0.03 | 0     | 0.024  | 0.15     | 0.0035   | 0.92     | NA | NA | NA | NA |
| 0.06  | 0.05  | -0.02 | 0.05  | 0.025  | 0.11     | 0.23     | 0.0011   | NA | NA | NA | NA |
| -0.16 | -0.1  | -0.07 | 0.02  | 0.026  | 0.32     | 0.00019  | 0.43     | NA | NA | NA | NA |
| 0.06  | 0.04  | -0.02 | 0.01  | 0.027  | 0.097    | 0.058    | 0.48     | NA | NA | NA | NA |

|       |       |       |       |       |          |          |          |    |    |    |    |
|-------|-------|-------|-------|-------|----------|----------|----------|----|----|----|----|
| 0.08  | 0.07  | -0.03 | 0.06  | 0.027 | 0.031    | 0.098    | 0.0025   | NA | NA | NA | NA |
| 0.1   | 0.03  | -0.07 | -0.08 | 0.027 | 0.3      | 3.90E-06 | 7.80E-07 | NA | NA | NA | NA |
| 0.14  | 0.19  | -0.04 | -0.03 | 0.028 | 0.00067  | 0.17     | 0.25     | NA | NA | NA | NA |
| 0.27  | 0.23  | -0.06 | 0.04  | 0.03  | 0.018    | 0.089    | 0.33     | NA | NA | NA | NA |
| 0.06  | 0.04  | -0.03 | 0.01  | 0.031 | 0.13     | 0.0047   | 0.35     | NA | NA | NA | NA |
| 0.21  | 0.24  | -0.06 | 0.01  | 0.032 | 9.10E-05 | 0.025    | 0.6      | NA | NA | NA | NA |
| 0.07  | 0.04  | -0.04 | 0     | 0.036 | 0.15     | 0.041    | 0.86     | NA | NA | NA | NA |
| -0.27 | -0.33 | -0.01 | -0.08 | 0.048 | 0.0023   | 0.98     | 0.15     | NA | NA | NA | NA |
| 0.71  | 0.18  | -0.08 | 0.14  | 0.049 | 0.46     | 0.078    | 0.012    | NA | NA | NA | NA |
| -0.13 | -0.04 | -0.04 | -0.03 | 0.05  | 0.61     | 0.094    | 0.11     | NA | NA | NA | NA |
| 0.1   | -0.02 | -0.01 | 0     | 0.056 | 0.63     | 0.59     | 1        | NA | NA | NA | NA |
| 0.31  | -0.08 | -0.09 | -0.05 | 0.056 | 0.61     | 0.00056  | 0.078    | NA | NA | NA | NA |
| 0.07  | 0.08  | -0.07 | 0.01  | 0.056 | 0.013    | 0.11     | 0.95     | NA | NA | NA | NA |
| 0.24  | 0.29  | -0.05 | -0.03 | 0.058 | 0.041    | 0.18     | 0.34     | NA | NA | NA | NA |
| 0.05  | -0.04 | 0     | -0.03 | 0.06  | 0.021    | 0.84     | 0.031    | NA | NA | NA | NA |
| 0.08  | 0.16  | -0.05 | -0.02 | 0.065 | 1.80E-06 | 0.011    | 0.24     | NA | NA | NA | NA |
| 0.17  | 0.16  | -0.08 | -0.07 | 0.068 | 0.061    | 0.00082  | 0.0014   | NA | NA | NA | NA |
| 0.12  | 0     | 0     | 0.15  | 0.068 | 1        | 1        | 1.70E-08 | NA | NA | NA | NA |
| 0.08  | 0.03  | -0.06 | -0.05 | 0.068 | 0.2      | 0.00035  | 0.00012  | NA | NA | NA | NA |
| 0.07  | 0.1   | -0.06 | 0.03  | 0.069 | 0.0093   | 0.00037  | 0.062    | NA | NA | NA | NA |
| 0.12  | 0.28  | -0.03 | 0.04  | 0.07  | 0.0011   | 0.13     | 0.026    | NA | NA | NA | NA |
| 0.07  | 0.21  | 0.01  | 0     | 0.07  | 2.70E-07 | 0.69     | 1        | NA | NA | NA | NA |
| 0.04  | 0     | -0.03 | 0     | 0.071 | 0.9      | 0.028    | 0.75     | NA | NA | NA | NA |
| -0.08 | -0.01 | -0.06 | -0.03 | 0.075 | 1        | 0.027    | 0.33     | NA | NA | NA | NA |
| 0.12  | 0     | -0.06 | -0.09 | 0.078 | 1        | 0.18     | 0.0062   | NA | NA | NA | NA |
| 0.12  | 0.07  | -0.05 | -0.03 | 0.079 | 0.081    | 0.0098   | 0.19     | NA | NA | NA | NA |
| 0.1   | 0.1   | -0.08 | -0.09 | 0.08  | 0.024    | 6.30E-06 | 9.20E-08 | NA | NA | NA | NA |
| 0.1   | -0.05 | -0.03 | 0.04  | 0.083 | 0.3      | 0.19     | 0.027    | NA | NA | NA | NA |
| 0.05  | 0.11  | -0.03 | 0.01  | 0.084 | 9.00E-05 | 0.079    | 0.65     | NA | NA | NA | NA |
| 0.05  | 0.12  | -0.05 | 0.01  | 0.085 | 0.0044   | 0.0023   | 0.53     | NA | NA | NA | NA |

|       |       |       |       |       |          |          |         |    |    |    |    |
|-------|-------|-------|-------|-------|----------|----------|---------|----|----|----|----|
| -0.75 | -0.9  | -0.05 | -0.06 | 0.087 | 0.00068  | 0.45     | 0.38    | NA | NA | NA | NA |
| 0.06  | -0.03 | -0.05 | -0.01 | 0.088 | 0.11     | 0.00018  | 0.52    | NA | NA | NA | NA |
| -0.17 | -0.14 | -0.03 | -0.08 | 0.088 | 0.14     | 0.22     | 0.00063 | NA | NA | NA | NA |
| 0.11  | 0.27  | -0.03 | 0.03  | 0.091 | 0.061    | 0.29     | 0.26    | NA | NA | NA | NA |
| 0.04  | 0.04  | -0.01 | 0.01  | 0.092 | 0.17     | 0.67     | 0.41    | NA | NA | NA | NA |
| 0.25  | 0.07  | -0.03 | 0     | 0.095 | 0.42     | 0.42     | 1       | NA | NA | NA | NA |
| 0.13  | 0.03  | 0     | 0.01  | 0.096 | 0.7      | 0.98     | 0.65    | NA | NA | NA | NA |
| -0.05 | -0.04 | -0.01 | 0.03  | 0.097 | 0.21     | 0.7      | 0.16    | NA | NA | NA | NA |
| -0.05 | -0.05 | -0.09 | -0.06 | 0.1   | 0.079    | 0.00014  | 0.0046  | NA | NA | NA | NA |
| 0.08  | 0.05  | 0.07  | 0.07  | 0.1   | 0.25     | 0.0066   | 0.0058  | NA | NA | NA | NA |
| 0.25  | 0.02  | -0.13 | 0.05  | 0.1   | 1        | 0.0014   | 0.37    | NA | NA | NA | NA |
| 0.16  | 0.01  | -0.09 | -0.06 | 0.11  | 1        | 9.60E-06 | 0.0032  | NA | NA | NA | NA |
| -0.21 | -0.13 | -0.08 | 0     | 0.11  | 0.096    | 0.013    | 1       | NA | NA | NA | NA |
| 0.07  | 0     | 0.01  | 0.03  | 0.11  | 1        | 0.52     | 0.016   | NA | NA | NA | NA |
| 0.1   | 0.14  | -0.03 | 0     | 0.12  | 0.0053   | 0.11     | 0.93    | NA | NA | NA | NA |
| -0.1  | 0.02  | -0.13 | -0.12 | 0.12  | 0.91     | 0.00029  | 0.00048 | NA | NA | NA | NA |
| 0.05  | 0.11  | -0.04 | 0.03  | 0.13  | 0.0033   | 0.0014   | 0.05    | NA | NA | NA | NA |
| 0.08  | 0.12  | -0.08 | -0.02 | 0.14  | 0.00017  | 5.20E-05 | 0.52    | NA | NA | NA | NA |
| 0.07  | -0.04 | -0.03 | 0.02  | 0.14  | 0.26     | 0.02     | 0.22    | NA | NA | NA | NA |
| 0.07  | 0.04  | -0.06 | 0     | 0.15  | 0.56     | 0.0038   | 1       | NA | NA | NA | NA |
| 0.13  | 0.11  | -0.07 | -0.03 | 0.15  | 0.17     | 0.0037   | 0.32    | NA | NA | NA | NA |
| 0.06  | 0.05  | 0.03  | -0.03 | 0.15  | 0.23     | 0.12     | 0.079   | NA | NA | NA | NA |
| 0.21  | 0.91  | 0.23  | 0.54  | 0.15  | 4.80E-09 | 0.17     | 0.0082  | NA | NA | NA | NA |
| 0.07  | 0.1   | 0     | 0.02  | 0.15  | 0.0084   | 1        | 0.47    | NA | NA | NA | NA |
| -0.06 | -0.03 | 0     | 0     | 0.15  | 0.79     | 0.81     | 0.85    | NA | NA | NA | NA |
| -0.19 | -0.16 | -0.06 | 0.01  | 0.16  | 2.00E-05 | 0.002    | 0.66    | NA | NA | NA | NA |
| 0.05  | -0.01 | -0.04 | 0     | 0.16  | 0.88     | 0.044    | 0.95    | NA | NA | NA | NA |
| 0.14  | 0.08  | -0.06 | 0     | 0.17  | 0.54     | 0.0053   | 0.99    | NA | NA | NA | NA |
| 0.07  | -0.04 | 0.01  | 0.02  | 0.17  | 0.17     | 0.79     | 0.44    | NA | NA | NA | NA |
| 0.16  | 0.01  | -0.02 | 0.08  | 0.17  | 1        | 0.26     | 0.00037 | NA | NA | NA | NA |

|       |       |       |       |      |          |          |          |    |    |    |    |
|-------|-------|-------|-------|------|----------|----------|----------|----|----|----|----|
| 0.02  | 0.07  | -0.03 | 0.02  | 0.17 | 0.00021  | 0.0045   | 0.1      | NA | NA | NA | NA |
| 0.08  | 0.13  | 0.02  | 0.02  | 0.18 | 0.0084   | 0.47     | 0.43     | NA | NA | NA | NA |
| 0.27  | NA    | 0.08  | 0.25  | 0.18 | NA       | 0.18     | 0.0022   | NA | NA | NA | NA |
| 0.05  | 0.01  | -0.04 | -0.04 | 0.18 | 0.99     | 0.035    | 0.036    | NA | NA | NA | NA |
| 0.1   | 0.09  | -0.04 | -0.01 | 0.19 | 2.80E-07 | 0.00032  | 0.28     | NA | NA | NA | NA |
| 0.05  | 0.1   | -0.02 | 0     | 0.19 | 0.043    | 0.13     | 0.91     | NA | NA | NA | NA |
| 0.12  | 0.42  | -0.05 | -0.02 | 0.19 | 0.013    | 0.06     | 0.38     | NA | NA | NA | NA |
| 0.03  | 0.08  | -0.03 | -0.02 | 0.19 | 0.0034   | 0.13     | 0.1      | NA | NA | NA | NA |
| 0.05  | 0.04  | -0.04 | 0     | 0.21 | 0.41     | 0.017    | 1        | NA | NA | NA | NA |
| -0.04 | -0.03 | 0.02  | 0.03  | 0.22 | 0.41     | 0.3      | 0.15     | NA | NA | NA | NA |
| 0.08  | 0.12  | -0.06 | 0     | 0.23 | 0.0014   | 0.0046   | 1        | NA | NA | NA | NA |
| -0.03 | 0.07  | 0.01  | 0.03  | 0.23 | 0.032    | 0.44     | 0.028    | NA | NA | NA | NA |
| 0.18  | 0.03  | -0.14 | -0.13 | 0.23 | 0.61     | 0.0057   | 4.00E-05 | NA | NA | NA | NA |
| 0.07  | 0.17  | -0.02 | -0.03 | 0.24 | 0.0042   | 0.43     | 0.23     | NA | NA | NA | NA |
| 0.04  | 0.03  | -0.01 | 0.03  | 0.24 | 0.22     | 0.44     | 0.036    | NA | NA | NA | NA |
| 0.1   | 0.07  | -0.2  | -0.21 | 0.24 | 0.25     | 9.30E-08 | 7.70E-09 | NA | NA | NA | NA |
| 0.16  | -0.13 | -0.04 | 0     | 0.24 | 0.078    | 0.12     | 0.99     | NA | NA | NA | NA |
| 0.05  | 0.15  | -0.03 | 0.07  | 0.25 | 0.00058  | 0.39     | 0.068    | NA | NA | NA | NA |
| 0.04  | 0.11  | -0.02 | 0.01  | 0.25 | 0.0021   | 0.26     | 0.51     | NA | NA | NA | NA |
| 0.27  | -0.07 | -0.06 | -0.04 | 0.26 | 1        | 0.3      | 0.54     | NA | NA | NA | NA |
| 0.34  | 0     | -0.01 | 0.08  | 0.26 | 1        | 0.73     | 0.0011   | NA | NA | NA | NA |
| 0.08  | 0.27  | -0.04 | -0.02 | 0.26 | 0.025    | 0.44     | 0.69     | NA | NA | NA | NA |
| 0.03  | 0.05  | -0.03 | -0.01 | 0.26 | 0.027    | 0.047    | 0.32     | NA | NA | NA | NA |
| 0.04  | 0.04  | -0.05 | -0.05 | 0.26 | 0.021    | 0.0014   | 2.50E-05 | NA | NA | NA | NA |
| 0.06  | 0.03  | 0.03  | -0.01 | 0.26 | 0.24     | 0.14     | 0.54     | NA | NA | NA | NA |
| -0.08 | -0.05 | -0.02 | 0     | 0.28 | 0.45     | 0.23     | 0.89     | NA | NA | NA | NA |
| -0.05 | 0.1   | -0.03 | -0.04 | 0.29 | 0.029    | 0.092    | 0.059    | NA | NA | NA | NA |
| -0.11 | -0.28 | -0.02 | 0.02  | 0.29 | 0.00025  | 0.43     | 0.48     | NA | NA | NA | NA |
| -0.2  | -0.03 | -0.05 | 0.03  | 0.29 | 1        | 0.19     | 0.65     | NA | NA | NA | NA |
| 0.05  | 0     | -0.06 | -0.07 | 0.29 | 1        | 0.0055   | 0.002    | NA | NA | NA | NA |

|       |       |       |       |      |          |          |          |    |    |    |    |
|-------|-------|-------|-------|------|----------|----------|----------|----|----|----|----|
| 0.03  | 0.04  | -0.05 | 0     | 0.31 | 0.53     | 0.025    | 1        | NA | NA | NA | NA |
| 0.06  | 0.07  | -0.05 | -0.03 | 0.31 | 0.032    | 0.0016   | 0.023    | NA | NA | NA | NA |
| 0.08  | -0.02 | 0     | 0.08  | 0.31 | 0.94     | 1        | 0.04     | NA | NA | NA | NA |
| 0.05  | -0.03 | 0.02  | 0.05  | 0.32 | 0.44     | 0.18     | 9.20E-06 | NA | NA | NA | NA |
| 0.03  | 0.09  | -0.06 | -0.05 | 0.32 | 3.00E-06 | 5.20E-09 | 6.70E-07 | NA | NA | NA | NA |
| 0.08  | 0.18  | -0.09 | 0.01  | 0.33 | 0.025    | 9.20E-06 | 0.83     | NA | NA | NA | NA |
| 0.05  | -0.03 | -0.03 | 0     | 0.33 | 0.84     | 0.29     | 0.98     | NA | NA | NA | NA |
| 0.05  | -0.04 | -0.05 | 0.06  | 0.34 | 0.19     | 0.0015   | 0.00035  | NA | NA | NA | NA |
| 0.86  | 0.53  | -0.01 | 0.07  | 0.34 | 0.00011  | 0.91     | 0.045    | NA | NA | NA | NA |
| 0.1   | 0.17  | 0.03  | 0.12  | 0.34 | 0.00013  | 0.37     | 0.00029  | NA | NA | NA | NA |
| 0.14  | 0.07  | -0.09 | -0.05 | 0.34 | 0.0041   | 1.10E-07 | 0.0018   | NA | NA | NA | NA |
| 0.05  | 0.11  | -0.03 | 0.01  | 0.35 | 0.014    | 0.11     | 0.85     | NA | NA | NA | NA |
| 0.12  | 0.07  | -0.11 | -0.04 | 0.35 | 0.26     | 1.30E-05 | 0.19     | NA | NA | NA | NA |
| 0.07  | -0.09 | -0.05 | 0.06  | 0.35 | 0.22     | 0.18     | 0.18     | NA | NA | NA | NA |
| 0.04  | 0.02  | -0.1  | -0.09 | 0.35 | 0.74     | 0.014    | 0.024    | NA | NA | NA | NA |
| -0.09 | -0.08 | -0.02 | 0.03  | 0.35 | 0.31     | 0.27     | 0.16     | NA | NA | NA | NA |
| -0.4  | 0     | -0.03 | 0.13  | 0.35 | 1        | 0.53     | 9.90E-05 | NA | NA | NA | NA |
| -0.02 | 0.03  | -0.02 | 0.01  | 0.36 | 0.26     | 0.29     | 0.62     | NA | NA | NA | NA |
| -0.05 | 0.02  | -0.03 | 0.01  | 0.36 | 0.66     | 0.081    | 0.69     | NA | NA | NA | NA |
| 0.04  | 0.04  | -0.05 | 0     | 0.38 | 0.028    | 0.00022  | 0.86     | NA | NA | NA | NA |
| 0.16  | 0.04  | 0.01  | -0.04 | 0.38 | 0.26     | 0.85     | 0.033    | NA | NA | NA | NA |
| -0.03 | -0.02 | 0     | -0.01 | 0.38 | 0.53     | 0.82     | 0.44     | NA | NA | NA | NA |
| -0.1  | 0.45  | 0.01  | 0.05  | 0.4  | 0.021    | 0.8      | 0.11     | NA | NA | NA | NA |
| 0.85  | -0.02 | -0.08 | 0.06  | 0.41 | 1        | 0.11     | 0.32     | NA | NA | NA | NA |
| 0.04  | 0.01  | 0     | 0     | 0.42 | 0.59     | 0.98     | 1        | NA | NA | NA | NA |
| 0.05  | 0.13  | -0.04 | 0.02  | 0.42 | 0.0031   | 0.0065   | 0.13     | NA | NA | NA | NA |
| 0.02  | 0.13  | -0.05 | -0.02 | 0.43 | 0.00041  | 0.00046  | 0.13     | NA | NA | NA | NA |
| 0.02  | 0.02  | -0.03 | 0.04  | 0.43 | 0.37     | 0.058    | 0.0026   | NA | NA | NA | NA |
| 0.06  | 0.03  | -0.02 | 0.02  | 0.45 | 0.79     | 0.26     | 0.24     | NA | NA | NA | NA |
| -0.05 | 0.05  | 0     | 0.01  | 0.47 | 0.46     | 0.95     | 0.57     | NA | NA | NA | NA |

|       |       |       |       |      |          |          |          |    |    |    |    |
|-------|-------|-------|-------|------|----------|----------|----------|----|----|----|----|
| 0.02  | 0.03  | 0.04  | -0.01 | 0.49 | 0.48     | 0.054    | 0.62     | NA | NA | NA | NA |
| 0.79  | NA    | 0     | 0.05  | 0.5  | NA       | 1        | 0.72     | NA | NA | NA | NA |
| 0.04  | 0.05  | -0.02 | 0.01  | 0.5  | 0.42     | 0.38     | 0.88     | NA | NA | NA | NA |
| 0.06  | 0.19  | -0.03 | 0.04  | 0.5  | 0.00044  | 0.11     | 0.044    | NA | NA | NA | NA |
| -0.19 | -0.12 | -0.06 | 0     | 0.5  | 0.62     | 0.031    | 1        | NA | NA | NA | NA |
| -0.04 | -0.04 | -0.09 | -0.01 | 0.5  | 0.23     | 4.40E-06 | 0.84     | NA | NA | NA | NA |
| -0.21 | 0.2   | -0.48 | -0.26 | 0.52 | 0.19     | 0.0016   | 0.19     | NA | NA | NA | NA |
| 0.01  | 0.08  | -0.05 | 0     | 0.52 | 0.00014  | 6.30E-08 | 1        | NA | NA | NA | NA |
| 0.02  | 0.12  | 0.01  | 0.06  | 0.54 | 1.10E-08 | 0.82     | 0.0015   | NA | NA | NA | NA |
| 0.01  | 0.03  | -0.05 | 0.03  | 0.55 | 0.078    | 4.90E-06 | 0.027    | NA | NA | NA | NA |
| 0.25  | NA    | -0.03 | 0.07  | 0.55 | NA       | 0.43     | 0.17     | NA | NA | NA | NA |
| -0.03 | -0.1  | -0.01 | 0.01  | 0.56 | 0.014    | 0.57     | 0.51     | NA | NA | NA | NA |
| -0.02 | -0.02 | 0.02  | 0.04  | 0.56 | 0.46     | 0.0044   | 4.70E-05 | NA | NA | NA | NA |
| 0.04  | 0.47  | -0.03 | 0.02  | 0.57 | 9.90E-07 | 0.12     | 0.46     | NA | NA | NA | NA |
| 0.03  | 0.05  | -0.07 | -0.04 | 0.58 | 0.18     | 0.00023  | 0.045    | NA | NA | NA | NA |
| -0.03 | -0.02 | -0.04 | 0.03  | 0.58 | 0.88     | 0.0064   | 0.13     | NA | NA | NA | NA |
| -0.03 | 0.24  | -0.08 | 0.05  | 0.58 | 0.00077  | 0.00044  | 0.044    | NA | NA | NA | NA |
| -0.05 | 0.05  | 0.01  | 0.04  | 0.6  | 0.041    | 0.67     | 0.0038   | NA | NA | NA | NA |
| 0.05  | 0.08  | -0.02 | 0.04  | 0.6  | 0.24     | 0.6      | 0.21     | NA | NA | NA | NA |
| 0.09  | 0.15  | 0     | 0.07  | 0.61 | 0.96     | 1        | 0.034    | NA | NA | NA | NA |
| 0.07  | 0.87  | -0.11 | -0.03 | 0.61 | 3.70E-06 | 7.10E-05 | 0.22     | NA | NA | NA | NA |
| -0.02 | -0.04 | -0.1  | -0.02 | 0.61 | 0.25     | 1.00E-09 | 0.3      | NA | NA | NA | NA |
| 0.02  | 0.09  | -0.06 | -0.02 | 0.62 | 0.0036   | 2.90E-06 | 0.046    | NA | NA | NA | NA |
| -0.01 | -0.05 | -0.02 | -0.01 | 0.62 | 0.0086   | 0.027    | 0.4      | NA | NA | NA | NA |
| -0.05 | 0.15  | -0.02 | 0.05  | 0.64 | 0.094    | 0.54     | 0.12     | NA | NA | NA | NA |
| 0.02  | 0.05  | -0.01 | 0.02  | 0.65 | 0.14     | 0.68     | 0.26     | NA | NA | NA | NA |
| 0.37  | 0.24  | 0.03  | 0.11  | 0.65 | 0.034    | 0.57     | 0.018    | NA | NA | NA | NA |
| 0.03  | 0.13  | -0.02 | 0.03  | 0.65 | 0.0034   | 0.15     | 0.11     | NA | NA | NA | NA |
| -0.09 | -0.06 | -0.07 | 0.03  | 0.66 | 0.75     | 0.0015   | 0.29     | NA | NA | NA | NA |
| 0.02  | 0.01  | -0.02 | -0.01 | 0.66 | 0.67     | 0.18     | 0.69     | NA | NA | NA | NA |

|       |       |       |       |      |        |          |          |    |    |    |    |
|-------|-------|-------|-------|------|--------|----------|----------|----|----|----|----|
| 0.05  | 0.09  | 0.01  | 0.12  | 0.67 | 0.039  | 0.79     | 1.60E-06 | NA | NA | NA | NA |
| 0.03  | 0.01  | -0.03 | 0.02  | 0.67 | 0.91   | 0.022    | 0.3      | NA | NA | NA | NA |
| -0.03 | -0.06 | -0.02 | 0.06  | 0.68 | 0.028  | 0.2      | 0.002    | NA | NA | NA | NA |
| 0.04  | 0     | -0.06 | 0.11  | 0.68 | 1      | 0.022    | 0.00052  | NA | NA | NA | NA |
| 0.05  | -0.01 | -0.04 | -0.02 | 0.68 | 0.96   | 0.025    | 0.24     | NA | NA | NA | NA |
| 0.01  | 0.03  | -0.05 | -0.01 | 0.68 | 0.084  | 1.00E-04 | 0.47     | NA | NA | NA | NA |
| 0.01  | 0.05  | -0.01 | 0.01  | 0.69 | 0.054  | 0.44     | 0.76     | NA | NA | NA | NA |
| 0.02  | 0.18  | -0.06 | -0.04 | 0.69 | 0.0016 | 0.0013   | 0.025    | NA | NA | NA | NA |
| 0.02  | -0.01 | -0.05 | -0.01 | 0.7  | 0.96   | 0.085    | 0.8      | NA | NA | NA | NA |
| 0.09  | -0.01 | -0.17 | -0.2  | 0.7  | 0.95   | 0.13     | 0.018    | NA | NA | NA | NA |
| 0.03  | 0.02  | -0.02 | 0.04  | 0.7  | 0.75   | 0.21     | 0.03     | NA | NA | NA | NA |
| 0.01  | 0     | -0.05 | -0.02 | 0.7  | 0.93   | 1.60E-05 | 0.099    | NA | NA | NA | NA |
| 0.02  | 0.09  | -0.02 | 0.06  | 0.71 | 0.006  | 0.15     | 0.00048  | NA | NA | NA | NA |
| -0.02 | 0.04  | -0.05 | -0.06 | 0.71 | 0.52   | 0.02     | 0.0023   | NA | NA | NA | NA |
| 0.08  | 0.01  | -0.05 | -0.03 | 0.72 | 1      | 0.022    | 0.15     | NA | NA | NA | NA |
| -0.01 | -0.03 | -0.01 | 0.03  | 0.73 | 0.24   | 0.55     | 0.039    | NA | NA | NA | NA |
| -0.01 | -0.06 | -0.04 | -0.01 | 0.73 | 0.024  | 0.0014   | 0.39     | NA | NA | NA | NA |
| 0.04  | 0.11  | -0.02 | 0.02  | 0.73 | 0.1    | 0.62     | 0.52     | NA | NA | NA | NA |
| 0.01  | 0.02  | -0.05 | -0.04 | 0.74 | 0.51   | 0.016    | 0.035    | NA | NA | NA | NA |
| 0.16  | 0.05  | -0.04 | -0.06 | 0.74 | 0.82   | 0.09     | 0.0063   | NA | NA | NA | NA |
| 0.05  | 0.22  | 0.01  | -0.03 | 0.74 | 0.088  | 1        | 0.85     | NA | NA | NA | NA |
| 0.01  | -0.07 | -0.01 | 0     | 0.74 | 0.002  | 0.71     | 0.91     | NA | NA | NA | NA |
| -0.03 | -0.02 | -0.07 | -0.03 | 0.75 | 0.54   | 0.0039   | 0.22     | NA | NA | NA | NA |
| 0.02  | 0.03  | -0.04 | 0.02  | 0.75 | 0.89   | 0.071    | 0.4      | NA | NA | NA | NA |
| -0.04 | 0.08  | -0.1  | -0.07 | 0.75 | 0.16   | 0.0017   | 0.025    | NA | NA | NA | NA |
| 0.03  | 0.15  | -0.02 | 0.01  | 0.75 | 0.0038 | 0.39     | 0.81     | NA | NA | NA | NA |
| 0.06  | 0.13  | -0.06 | -0.03 | 0.75 | 0.0011 | 0.0059   | 0.13     | NA | NA | NA | NA |
| -0.03 | 0.01  | -0.01 | 0.03  | 0.77 | 1      | 0.61     | 0.19     | NA | NA | NA | NA |
| 0.01  | 0.01  | 0.02  | -0.04 | 0.78 | 0.84   | 0.59     | 0.082    | NA | NA | NA | NA |
| -0.03 | 0.13  | -0.08 | -0.01 | 0.78 | 0.015  | 4.40E-05 | 0.68     | NA | NA | NA | NA |

|       |       |       |       |      |          |          |          |    |    |    |    |
|-------|-------|-------|-------|------|----------|----------|----------|----|----|----|----|
| -0.03 | 0.2   | -0.05 | 0.08  | 0.78 | 0.0067   | 0.016    | 0.00047  | NA | NA | NA | NA |
| 0.01  | -0.01 | -0.02 | 0     | 0.8  | 0.63     | 0.17     | 0.85     | NA | NA | NA | NA |
| 0.02  | 0.16  | -0.1  | -0.05 | 0.8  | 0.0017   | 2.10E-07 | 0.0075   | NA | NA | NA | NA |
| 0.75  | 0.25  | NA    | NA    | 0.82 | 1        | NA       | NA       | NA | NA | NA | NA |
| 0.01  | 0.07  | -0.03 | -0.03 | 0.82 | 0.011    | 0.048    | 0.032    | NA | NA | NA | NA |
| 0.03  | 0.05  | -0.11 | -0.07 | 0.85 | 0.22     | 0.00031  | 0.019    | NA | NA | NA | NA |
| 0.03  | 0.01  | 0     | 0.04  | 0.85 | 1        | 1        | 0.24     | NA | NA | NA | NA |
| 0.2   | -0.03 | -0.06 | -0.01 | 0.86 | 0.56     | 0.013    | 0.67     | NA | NA | NA | NA |
| 0.01  | 0.04  | 0.03  | -0.06 | 0.89 | 0.2      | 0.28     | 0.0014   | NA | NA | NA | NA |
| 0.01  | 0.03  | -0.03 | 0.03  | 0.89 | 0.041    | 0.014    | 0.0073   | NA | NA | NA | NA |
| 0.01  | -0.05 | -0.04 | -0.03 | 0.9  | 0.078    | 0.077    | 0.13     | NA | NA | NA | NA |
| 0.01  | -0.01 | -0.02 | 0     | 0.9  | 0.66     | 0.14     | 0.92     | NA | NA | NA | NA |
| -0.03 | 0.14  | -0.06 | 0.06  | 0.91 | 0.011    | 0.066    | 0.089    | NA | NA | NA | NA |
| 0.07  | 0.07  | -0.04 | 0.01  | 0.91 | 0.47     | 0.36     | 0.88     | NA | NA | NA | NA |
| -0.01 | 0.01  | -0.03 | -0.01 | 0.91 | 0.66     | 0.031    | 0.58     | NA | NA | NA | NA |
| 0.05  | NA    | -0.1  | -0.16 | 0.91 | NA       | 0.023    | 6.90E-06 | NA | NA | NA | NA |
| 0.03  | 0.02  | -0.01 | 0     | 0.93 | 0.63     | 1        | 1        | NA | NA | NA | NA |
| 0     | 0.03  | 0.01  | 0.01  | 0.93 | 0.18     | 0.39     | 0.5      | NA | NA | NA | NA |
| -0.01 | 0.03  | -0.05 | -0.03 | 0.93 | 0.54     | 0.0058   | 0.11     | NA | NA | NA | NA |
| -0.08 | -0.05 | -0.06 | -0.02 | 0.94 | 0.8      | 0.19     | 0.69     | NA | NA | NA | NA |
| -0.07 | -0.07 | -0.05 | 0.08  | 0.94 | 0.58     | 0.019    | 0.0018   | NA | NA | NA | NA |
| 0.01  | 0     | -0.01 | 0.02  | 0.94 | 0.92     | 0.61     | 0.069    | NA | NA | NA | NA |
| -0.01 | -0.01 | -0.05 | -0.03 | 0.95 | 0.71     | 0.0013   | 0.088    | NA | NA | NA | NA |
| 0.01  | 0.35  | -0.04 | -0.01 | 0.95 | 6.40E-09 | 0.061    | 0.65     | NA | NA | NA | NA |
| 0     | 0.02  | -0.02 | -0.02 | 0.95 | 0.36     | 0.024    | 0.043    | NA | NA | NA | NA |
| 0.01  | 0.05  | -0.01 | 0.08  | 0.96 | 0.054    | 1        | 0.038    | NA | NA | NA | NA |
| 0     | 0.05  | -0.07 | -0.04 | 0.96 | 0.021    | 2.60E-05 | 0.017    | NA | NA | NA | NA |
| -0.01 | 0.03  | 0     | -0.01 | 0.96 | 0.5      | 0.89     | 0.54     | NA | NA | NA | NA |
| -0.01 | 0.33  | -0.09 | -0.09 | 0.97 | 0.00011  | 5.00E-04 | 0.00052  | NA | NA | NA | NA |
| 0.03  | 0.13  | -0.13 | 0.1   | 0.98 | 0.14     | 0.00011  | 0.012    | NA | NA | NA | NA |



|       |       |       |       |      |          |          |         |    |    |    |    |
|-------|-------|-------|-------|------|----------|----------|---------|----|----|----|----|
| -0.03 | -0.02 | -0.04 | 0.02  | 0.98 | 0.93     | 0.02     | 0.38    | NA | NA | NA | NA |
| -0.01 | -0.01 | -0.05 | 0     | 0.99 | 0.85     | 0.0054   | 0.96    | NA | NA | NA | NA |
| -0.04 | 0.09  | -0.01 | 0.02  | 0.99 | 0.5      | 0.83     | 0.53    | NA | NA | NA | NA |
| -0.01 | -0.04 | -0.07 | -0.07 | 1    | 0.55     | 0.0036   | 0.0014  | NA | NA | NA | NA |
| 0     | -0.03 | -0.14 | -0.16 | 1    | 1        | 0.13     | 0.1     | NA | NA | NA | NA |
| 0.21  | -0.1  | 0.02  | 0.2   | 1    | 0.85     | 0.8      | 0.017   | NA | NA | NA | NA |
| 0.01  | -0.04 | 0     | 0.07  | 1    | 0.21     | 0.87     | 0.00075 | NA | NA | NA | NA |
| 0.01  | -0.01 | -0.04 | 0.05  | 1    | 0.9      | 0.29     | 0.21    | NA | NA | NA | NA |
| 0.04  | NA    | 0.01  | -0.01 | 1    | NA       | 0.92     | 0.86    | NA | NA | NA | NA |
| 0.05  | 0.32  | -0.05 | 0.01  | 1    | 0.32     | 0.015    | 0.83    | NA | NA | NA | NA |
| 0.02  | 0.01  | 0.01  | 0.03  | 1    | 0.93     | 0.75     | 0.12    | NA | NA | NA | NA |
| -0.01 | 0.21  | -0.08 | -0.03 | 1    | 0.0011   | 0.0056   | 0.23    | NA | NA | NA | NA |
| 0     | -0.02 | -0.02 | 0.02  | 1    | 0.74     | 0.39     | 0.54    | NA | NA | NA | NA |
| 0.03  | NA    | -0.01 | 0.06  | 1    | NA       | 0.82     | 0.058   | NA | NA | NA | NA |
| 0.02  | -0.04 | 0     | 0.11  | 1    | 0.84     | 1        | 0.00092 | NA | NA | NA | NA |
| 0.18  | 0.1   | -0.01 | 0.02  | 1    | 0.92     | 0.77     | 0.71    | NA | NA | NA | NA |
| -0.01 | 0.04  | -0.1  | -0.12 | 1    | 0.29     | 0.0077   | 0.00015 | NA | NA | NA | NA |
| -0.01 | 0.17  | -0.1  | -0.03 | 1    | 0.11     | 0.065    | 0.55    | NA | NA | NA | NA |
| 0.04  | -0.01 | -0.04 | 0.05  | 1    | 1        | 0.31     | 0.23    | NA | NA | NA | NA |
| -0.03 | -0.09 | -0.03 | 0     | 1    | 0.44     | 0.56     | 1       | NA | NA | NA | NA |
| 0.05  | 0     | -0.04 | -0.04 | 1    | 1        | 0.36     | 0.29    | NA | NA | NA | NA |
| 0.06  | NA    | -0.17 | -0.08 | 1    | NA       | 0.014    | 0.68    | NA | NA | NA | NA |
| -0.02 | -0.03 | -0.04 | 0.08  | 1    | 0.86     | 0.26     | 0.016   | NA | NA | NA | NA |
| 0.01  | 0.07  | 0.02  | 0.01  | 1    | 0.028    | 0.26     | 0.7     | NA | NA | NA | NA |
| 0.06  | -0.13 | -0.09 | -0.03 | 1    | 0.5      | 0.087    | 0.56    | NA | NA | NA | NA |
| -0.02 | 0.03  | -0.11 | -0.07 | 1    | 0.81     | 1.70E-05 | 0.008   | NA | NA | NA | NA |
| 0.02  | 0.07  | -0.12 | -0.02 | 1    | 1        | 0.048    | 0.75    | NA | NA | NA | NA |
| 0.04  | 0.54  | -0.06 | -0.03 | 1    | 1.10E-08 | 0.011    | 0.36    | NA | NA | NA | NA |
| 0.06  | 0.13  | 0     | 0.03  | 1    | 6.00E-05 | 1        | 0.062   | NA | NA | NA | NA |
| 0     | 0.02  | -0.01 | -0.01 | 1    | 1        | 1        | 0.88    | NA | NA | NA | NA |

|       |       |       |       |    |          |          |          |    |    |    |    |
|-------|-------|-------|-------|----|----------|----------|----------|----|----|----|----|
| 0.01  | NA    | 0     | 0.03  | 1  | NA       | 1        | 0.27     | NA | NA | NA | NA |
| -0.04 | 0.26  | -0.45 | -0.17 | 1  | 0.28     | 1.20E-05 | 0.49     | NA | NA | NA | NA |
| 0     | NA    | -0.18 | -0.05 | 1  | NA       | 0.0034   | 0.38     | NA | NA | NA | NA |
| 0     | 0.01  | -0.04 | -0.02 | 1  | 0.64     | 0.0029   | 0.098    | NA | NA | NA | NA |
| 0.01  | 0.47  | 0.06  | -0.02 | 1  | 0.004    | 0.19     | 0.66     | NA | NA | NA | NA |
| 0.01  | 0.09  | -0.07 | -0.07 | 1  | 0.12     | 0.022    | 0.027    | NA | NA | NA | NA |
| 0.01  | 0.01  | -0.11 | -0.06 | 1  | 1        | 0.00036  | 0.088    | NA | NA | NA | NA |
| -0.04 | -0.4  | -0.04 | -0.02 | 1  | 1.50E-08 | 0.11     | 0.59     | NA | NA | NA | NA |
| 0     | 0     | -0.08 | -0.03 | 1  | 1        | 0.0073   | 0.22     | NA | NA | NA | NA |
| 0     | 0     | -0.05 | -0.04 | 1  | 1        | 0.027    | 0.083    | NA | NA | NA | NA |
| 0.04  | 0.04  | -0.1  | -0.06 | 1  | 0.3      | 0.01     | 0.069    | NA | NA | NA | NA |
| 0.01  | NA    | -0.08 | -0.07 | 1  | NA       | 0.014    | 0.015    | NA | NA | NA | NA |
| -0.05 | 0.08  | 0.03  | 0.07  | 1  | 0.74     | 0.33     | 0.019    | NA | NA | NA | NA |
| 0.07  | 0.04  | 0.02  | 0.02  | 1  | 1        | 0.53     | 0.33     | NA | NA | NA | NA |
| 0     | 0.12  | -0.07 | -0.02 | 1  | 0.00031  | 1.60E-05 | 0.15     | NA | NA | NA | NA |
| 0     | 0.08  | -0.01 | 0.04  | 1  | 0.092    | 0.23     | 0.0061   | NA | NA | NA | NA |
| 0     | -0.58 | -0.05 | 0.04  | 1  | 0.9      | 0.88     | 0.91     | NA | NA | NA | NA |
| NA    | NA    | 0.02  | 0.87  | NA | NA       | 1        | 1.60E-06 | NA | NA | NA | NA |
| NA    | NA    | NA    | NA    | NA | NA       | NA       | NA       | NA | NA | NA | NA |
| NA    | NA    | NA    | NA    | NA | NA       | NA       | NA       | NA | NA | NA | NA |
| NA    | NA    | NA    | NA    | NA | NA       | NA       | NA       | NA | NA | NA | NA |
| NA    | 0.13  | 0.02  | 0.19  | NA | 0.73     | 0.47     | 4.00E-08 | NA | NA | NA | NA |
| NA    | NA    | 0.09  | 0.19  | NA | NA       | 0.062    | 4.00E-06 | NA | NA | NA | NA |
| NA    | NA    | NA    | NA    | NA | NA       | NA       | NA       | NA | NA | NA | NA |
| NA    | NA    | 0.01  | 0.22  | NA | NA       | 0.94     | 1.60E-05 | NA | NA | NA | NA |
| NA    | NA    | NA    | NA    | NA | NA       | NA       | NA       | NA | NA | NA | NA |
| NA    | NA    | NA    | NA    | NA | NA       | NA       | NA       | NA | NA | NA | NA |
| NA    | NA    | NA    | NA    | NA | NA       | NA       | NA       | NA | NA | NA | NA |
| NA    | NA    | 0.05  | NA    | NA | NA       | 1        | NA       | NA | NA | NA | NA |
| NA    | NA    | 0.5   | 0.5   | NA | NA       | 1        | 0.7      | NA | NA | NA | NA |

|    |      |       |       |    |        |          |          |    |    |    |    |
|----|------|-------|-------|----|--------|----------|----------|----|----|----|----|
| NA | NA   | 0.02  | 0.13  | NA | NA     | 1        | 0.58     | NA | NA | NA | NA |
| NA | NA   | NA    | NA    | NA | NA     | NA       | NA       | NA | NA | NA | NA |
| NA | NA   | NA    | NA    | NA | NA     | NA       | NA       | NA | NA | NA | NA |
| NA | NA   | NA    | NA    | NA | NA     | NA       | NA       | NA | NA | NA | NA |
| NA | 0.06 | -0.03 | 0.11  | NA | 0.49   | 0.48     | 0.0066   | NA | NA | NA | NA |
| NA | NA   | NA    | NA    | NA | NA     | NA       | NA       | NA | NA | NA | NA |
| NA | 0.05 | -0.09 | 0.81  | NA | 0.23   | 0.78     | 0.45     | NA | NA | NA | NA |
| NA | 0    | NA    | NA    | NA | 1      | NA       | NA       | NA | NA | NA | NA |
| NA | 0.5  | -0.24 | 0.13  | NA | 0.023  | 0.63     | 1        | NA | NA | NA | NA |
| NA | NA   | 0.08  | -0.02 | NA | NA     | 0.78     | 1        | NA | NA | NA | NA |
| NA | NA   | -0.04 | 0.86  | NA | NA     | 0.97     | 0.00033  | NA | NA | NA | NA |
| NA | NA   | -0.12 | -0.12 | NA | NA     | 0.021    | 0.059    | NA | NA | NA | NA |
| NA | NA   | 0.01  | 0     | NA | NA     | 1        | 1        | NA | NA | NA | NA |
| NA | NA   | NA    | 0     | NA | NA     | NA       | 1        | NA | NA | NA | NA |
| NA | NA   | NA    | NA    | NA | NA     | NA       | NA       | NA | NA | NA | NA |
| NA | 0.51 | -0.08 | 0.02  | NA | 0.0012 | 0.00017  | 0.57     | NA | NA | NA | NA |
| NA | 0.36 | 0.05  | -0.06 | NA | 0.26   | 0.87     | 0.81     | NA | NA | NA | NA |
| NA | NA   | NA    | NA    | NA | NA     | NA       | NA       | NA | NA | NA | NA |
| NA | NA   | -0.03 | 0.04  | NA | NA     | 0.36     | 0.63     | NA | NA | NA | NA |
| NA | NA   | -0.06 | NA    | NA | NA     | 0.98     | NA       | NA | NA | NA | NA |
| NA | NA   | -0.02 | 0.21  | NA | NA     | 1        | 0.054    | NA | NA | NA | NA |
| NA | NA   | 0.18  | 0.11  | NA | NA     | 0.00014  | 0.013    | NA | NA | NA | NA |
| NA | NA   | NA    | NA    | NA | NA     | NA       | NA       | NA | NA | NA | NA |
| NA | 0.2  | 0.01  | 0.01  | NA | 0.031  | 0.83     | 0.78     | NA | NA | NA | NA |
| NA | NA   | 0.08  | 0.34  | NA | NA     | 0.22     | 8.60E-06 | NA | NA | NA | NA |
| NA | 0.22 | -0.1  | -0.05 | NA | 0.012  | 0.073    | 0.45     | NA | NA | NA | NA |
| NA | 0.57 | -0.21 | NA    | NA | 0.15   | 0.025    | NA       | NA | NA | NA | NA |
| NA | NA   | -0.25 | 0.22  | NA | NA     | 0.37     | 1        | NA | NA | NA | NA |
| NA | NA   | -0.1  | -0.06 | NA | NA     | 0.0022   | 0.12     | NA | NA | NA | NA |
| NA | 0.03 | -0.92 | 0     | NA | 1      | 2.30E-09 | 1        | NA | NA | NA | NA |

|       |       |       |       |          |          |          |          |    |    |    |    |
|-------|-------|-------|-------|----------|----------|----------|----------|----|----|----|----|
| NA    | NA    | -0.08 | -0.08 | NA       | NA       | 0.034    | 0.048    | NA | NA | NA | NA |
| NA    | NA    | -0.04 | 0.05  | NA       | NA       | 0.57     | 0.2      | NA | NA | NA | NA |
| NA    | 0.02  | -0.1  | -0.05 | NA       | 0.99     | 0.00065  | 0.13     | NA | NA | NA | NA |
| NA    | NA    | -0.03 | -0.03 | NA       | NA       | 0.5      | 0.56     | NA | NA | NA | NA |
| NA    | NA    | -0.09 | -0.06 | NA       | NA       | 0.17     | 0.17     | NA | NA | NA | NA |
| NA    | NA    | 0.02  | 0.04  | NA       | NA       | 1        | 1        | NA | NA | NA | NA |
| NA    | NA    | NA    | NA    | NA       | NA       | NA       | NA       | NA | NA | NA | NA |
| NA    | NA    | 0.06  | NA    | NA       | NA       | 0.51     | NA       | NA | NA | NA | NA |
| NA    | NA    | -0.18 | 0.09  | NA       | NA       | 0.18     | 0.82     | NA | NA | NA | NA |
| NA    | -0.16 | -0.04 | -0.01 | NA       | 0.4      | 0.24     | 0.86     | NA | NA | NA | NA |
| NA    | NA    | NA    | NA    | NA       | NA       | NA       | NA       | NA | NA | NA | NA |
| NA    | NA    | -0.05 | 0.09  | NA       | NA       | 0.42     | 0.35     | NA | NA | NA | NA |
| NA    | NA    | -0.03 | 0.78  | NA       | NA       | 0.93     | 0.091    | NA | NA | NA | NA |
| NA    | NA    | 0     | 0.15  | NA       | NA       | 1        | 6.20E-06 | NA | NA | NA | NA |
| NA    | NA    | NA    | NA    | NA       | NA       | NA       | NA       | NA | NA | NA | NA |
| NA    | NA    | -0.22 | -0.12 | NA       | NA       | 0.36     | 1        | NA | NA | NA | NA |
| NA    | NA    | 0.09  | 0.37  | NA       | NA       | 0.9      | 0.35     | NA | NA | NA | NA |
| NA    | NA    | -0.23 | NA    | NA       | NA       | 0.18     | NA       | NA | NA | NA | NA |
| NA    | NA    | -0.16 | -0.12 | NA       | NA       | 0.00039  | 0.0027   | NA | NA | NA | NA |
| NA    | 0.42  | -0.04 | -0.07 | NA       | 6.30E-05 | 0.29     | 0.013    | NA | NA | NA | NA |
| NA    | NA    | NA    | NA    | NA       | NA       | NA       | NA       | NA | NA | NA | NA |
| NA    | NA    | NA    | NA    | NA       | NA       | NA       | NA       | NA | NA | NA | NA |
| NA    | NA    | -0.37 | NA    | NA       | NA       | 0.15     | NA       | NA | NA | NA | NA |
| NA    | NA    | 0.07  | 0.04  | NA       | NA       | 0.45     | 0.42     | NA | NA | NA | NA |
| NA    | 0.42  | -0.14 | 0.03  | NA       | 0.00058  | 1.60E-08 | 0.45     | NA | NA | NA | NA |
| NA    | NA    | -0.09 | 0.61  | NA       | NA       | 0.88     | 0.84     | NA | NA | NA | NA |
| NA    | NA    | -0.12 | 0     | NA       | NA       | 0.64     | 1        | NA | NA | NA | NA |
| NA    | NA    | -0.04 | -0.03 | NA       | NA       | 0.4      | 0.59     | NA | NA | NA | NA |
| -0.18 | -0.12 | -0.05 | -0.01 | 1.60E-08 | 0.0012   | 0.0071   | 0.65     | NA | NA | NA | NA |
| 0.22  | 0.1   | -0.02 | 0.06  | 2.90E-08 | 6.80E-05 | 0.38     | 0.0076   | NA | NA | NA | NA |

|       |       |       |       |          |          |          |          |    |    |    |    |
|-------|-------|-------|-------|----------|----------|----------|----------|----|----|----|----|
| 0.18  | 0.03  | -0.03 | 0.03  | 7.10E-08 | 0.4      | 0.17     | 0.19     | NA | NA | NA | NA |
| 0.17  | 0.07  | -0.04 | 0     | 1.60E-07 | 0.014    | 0.00036  | 0.81     | NA | NA | NA | NA |
| 0.49  | 0.4   | -0.03 | 0.02  | 1.70E-07 | 0.00013  | 0.3      | 0.57     | NA | NA | NA | NA |
| 0.63  | 0.03  | 0     | 0.19  | 5.40E-07 | 0.67     | 0.99     | 2.00E-06 | NA | NA | NA | NA |
| 0.36  | -0.06 | 0     | 0.04  | 7.10E-07 | 0.12     | 0.92     | 0.1      | NA | NA | NA | NA |
| 0.13  | 0.1   | -0.05 | 0     | 1.90E-06 | 4.20E-05 | 3.60E-05 | 0.76     | NA | NA | NA | NA |
| 0.41  | 0.11  | -0.02 | 0.06  | 4.00E-06 | 0.34     | 0.51     | 0.28     | NA | NA | NA | NA |
| 0.21  | 0     | -0.07 | 0.04  | 5.00E-06 | 1        | 8.00E-05 | 0.14     | NA | NA | NA | NA |
| 0.22  | 0.07  | -0.07 | -0.07 | 8.30E-06 | 0.014    | 0.0017   | 0.00062  | NA | NA | NA | NA |
| 0.15  | 0.08  | -0.05 | 0     | 9.30E-06 | 0.0017   | 0.015    | 0.93     | NA | NA | NA | NA |
| 0.16  | 0.02  | -0.02 | 0.01  | 1.30E-05 | 0.3      | 0.2      | 0.49     | NA | NA | NA | NA |
| 0.11  | 0.01  | -0.01 | 0.03  | 1.40E-05 | 0.44     | 0.65     | 0.043    | NA | NA | NA | NA |
| 0.9   | 0.01  | 0.04  | 0.03  | 1.70E-05 | 1        | 0.21     | 0.72     | NA | NA | NA | NA |
| 0.24  | -0.01 | -0.02 | 0.03  | 2.60E-05 | 0.93     | 0.46     | 0.55     | NA | NA | NA | NA |
| 0.23  | 0.11  | -0.02 | 0.03  | 6.70E-05 | 0.023    | 0.6      | 0.41     | NA | NA | NA | NA |
| 0.4   | -0.04 | -0.02 | 0     | 0.00011  | 0.44     | 0.16     | 0.84     | NA | NA | NA | NA |
| 0.25  | 0.06  | 0.02  | 0.01  | 0.00013  | 0.29     | 0.7      | 0.86     | NA | NA | NA | NA |
| 0.41  | 0.01  | -0.01 | 0.05  | 0.00015  | 1        | 0.72     | 0.12     | NA | NA | NA | NA |
| 0.14  | 0.14  | -0.05 | -0.03 | 0.00019  | 8.40E-07 | 0.00094  | 0.036    | NA | NA | NA | NA |
| 0.18  | 0.12  | -0.03 | 0.03  | 0.00022  | 0.00063  | 0.072    | 0.18     | NA | NA | NA | NA |
| 0.19  | 0.1   | 0.01  | 0.09  | 0.00023  | 0.00066  | 0.67     | 3.30E-07 | NA | NA | NA | NA |
| -0.24 | 0.12  | -0.15 | -0.15 | 0.00023  | 0.016    | 7.00E-06 | 4.70E-05 | NA | NA | NA | NA |
| 0.19  | 0.03  | 0.02  | 0.11  | 0.00026  | 0.47     | 0.2      | 1.50E-06 | NA | NA | NA | NA |
| 0.23  | 0     | 0.09  | 0.14  | 0.00027  | 1        | 0.024    | 0.00055  | NA | NA | NA | NA |
| 0.05  | 0.06  | -0.01 | 0.05  | 0.00044  | 4.80E-05 | 0.64     | 3.20E-06 | NA | NA | NA | NA |
| 0.23  | 0.41  | -0.01 | -0.01 | 0.00048  | 1.30E-09 | 0.76     | 0.76     | NA | NA | NA | NA |
| 0.18  | 0.03  | -0.05 | -0.03 | 0.00059  | 0.35     | 0.00091  | 0.14     | NA | NA | NA | NA |
| 0.2   | 0.07  | 0.04  | 0.07  | 0.00063  | 0.32     | 0.2      | 0.046    | NA | NA | NA | NA |
| 0.16  | 0.06  | -0.01 | 0.07  | 0.00082  | 0.29     | 0.62     | 2.00E-04 | NA | NA | NA | NA |
| 0.13  | 0.09  | -0.03 | 0.01  | 0.00084  | 0.00044  | 0.12     | 0.39     | NA | NA | NA | NA |

|       |       |       |       |         |          |          |          |    |    |    |    |
|-------|-------|-------|-------|---------|----------|----------|----------|----|----|----|----|
| 0.71  | 0.13  | -0.05 | -0.03 | 0.00096 | 0.32     | 0.27     | 0.84     | NA | NA | NA | NA |
| -0.11 | 0.09  | 0.01  | 0.01  | 0.0011  | 0.063    | 0.81     | 0.58     | NA | NA | NA | NA |
| 0.09  | 0.05  | -0.01 | 0.08  | 0.0013  | 0.018    | 0.28     | 1.80E-09 | NA | NA | NA | NA |
| 0.14  | 0.12  | -0.03 | -0.04 | 0.0014  | 0.0056   | 0.13     | 0.028    | NA | NA | NA | NA |
| 0.27  | -0.05 | 0     | 0.05  | 0.0014  | 0.45     | 1        | 0.035    | NA | NA | NA | NA |
| 0.09  | 0.06  | -0.04 | -0.03 | 0.0014  | 0.022    | 0.021    | 0.14     | NA | NA | NA | NA |
| 0.27  | 0.1   | 0.01  | 0.03  | 0.0016  | 0.085    | 0.59     | 0.11     | NA | NA | NA | NA |
| 0.11  | 0.05  | -0.05 | -0.01 | 0.0017  | 0.047    | 0.0065   | 0.75     | NA | NA | NA | NA |
| 0.1   | 0.02  | -0.02 | 0.02  | 0.0021  | 0.39     | 0.049    | 0.22     | NA | NA | NA | NA |
| 0.12  | 0.06  | 0     | 0.05  | 0.0021  | 0.04     | 1        | 0.42     | NA | NA | NA | NA |
| 0.09  | 0.09  | -0.02 | 0.01  | 0.0023  | 0.0025   | 0.17     | 0.76     | NA | NA | NA | NA |
| -0.29 | 0.58  | -0.05 | 0.06  | 0.0027  | 0.9      | 0.022    | 0.016    | NA | NA | NA | NA |
| 0.14  | 0.21  | -0.07 | -0.06 | 0.0035  | 2.00E-07 | 0.0025   | 0.023    | NA | NA | NA | NA |
| 0.14  | 0.05  | -0.03 | 0.04  | 0.0036  | 0.13     | 0.17     | 0.15     | NA | NA | NA | NA |
| 0.17  | 0.02  | -0.07 | 0.01  | 0.0039  | 0.53     | 8.20E-06 | 0.83     | NA | NA | NA | NA |
| 0.69  | 0.08  | 0.04  | 0.05  | 0.0041  | 0.54     | 0.29     | 0.28     | NA | NA | NA | NA |
| -0.26 | 0.03  | 0.05  | -0.05 | 0.0043  | 1        | 0.4      | 0.21     | NA | NA | NA | NA |
| 0.16  | 0.07  | 0.01  | 0.03  | 0.0048  | 0.02     | 0.83     | 0.29     | NA | NA | NA | NA |
| 0.08  | 0.05  | -0.01 | 0.08  | 0.0051  | 0.029    | 0.55     | 2.20E-06 | NA | NA | NA | NA |
| 0.08  | 0.14  | -0.01 | 0     | 0.0053  | 2.20E-07 | 0.67     | 0.85     | NA | NA | NA | NA |
| -0.17 | -0.1  | -0.03 | 0.02  | 0.0054  | 0.23     | 0.33     | 0.71     | NA | NA | NA | NA |
| 0.09  | 0.04  | -0.04 | 0.03  | 0.0056  | 0.11     | 0.026    | 0.16     | NA | NA | NA | NA |
| -0.1  | 0.1   | -0.05 | 0.06  | 0.0067  | 0.08     | 0.016    | 0.0051   | NA | NA | NA | NA |
| 0.11  | 0.15  | -0.15 | 0.12  | 0.0069  | 0.0037   | 3.80E-06 | 0.015    | NA | NA | NA | NA |
| 0.22  | 0.61  | -0.02 | 0.05  | 0.0069  | 1.90E-09 | 0.33     | 0.095    | NA | NA | NA | NA |
| 0.31  | -0.03 | 0.02  | 0.02  | 0.0072  | 1        | 0.52     | 0.57     | NA | NA | NA | NA |
| 0.26  | 0.28  | -0.08 | 0.06  | 0.0072  | 0.0032   | 0.0059   | 0.13     | NA | NA | NA | NA |
| 0.08  | 0     | -0.05 | -0.02 | 0.0097  | 1        | 0.021    | 0.43     | NA | NA | NA | NA |
| 0.15  | 0.09  | 0.02  | 0.01  | 0.01    | 0.011    | 0.2      | 0.64     | NA | NA | NA | NA |
| 0.08  | 0.03  | 0.04  | 0.02  | 0.01    | 0.14     | 0.043    | 0.14     | NA | NA | NA | NA |

|       |       |       |       |       |          |          |          |    |    |    |    |
|-------|-------|-------|-------|-------|----------|----------|----------|----|----|----|----|
| -0.1  | -0.01 | -0.05 | 0.02  | 0.011 | 1        | 0.051    | 0.44     | NA | NA | NA | NA |
| 0.16  | 0.39  | -0.04 | 0.01  | 0.011 | 1.10E-09 | 0.045    | 0.74     | NA | NA | NA | NA |
| 0.21  | 0     | -0.22 | -0.14 | 0.011 | 1        | 3.70E-09 | 0.0023   | NA | NA | NA | NA |
| 0.09  | 0.16  | -0.04 | -0.04 | 0.011 | 0.0017   | 0.042    | 0.029    | NA | NA | NA | NA |
| 0.09  | 0.17  | -0.04 | -0.01 | 0.012 | 0.0016   | 0.15     | 0.53     | NA | NA | NA | NA |
| -0.31 | -0.04 | 0.18  | 0.02  | 0.012 | 1        | 0.0018   | 0.74     | NA | NA | NA | NA |
| 0.6   | 0.21  | -0.02 | 0.09  | 0.013 | 0.0065   | 0.35     | 0.0014   | NA | NA | NA | NA |
| 0.08  | 0.05  | -0.01 | 0.02  | 0.013 | 0.0069   | 0.52     | 0.29     | NA | NA | NA | NA |
| 0.09  | -0.02 | -0.06 | 0.05  | 0.013 | 0.58     | 0.00024  | 0.0053   | NA | NA | NA | NA |
| 0.12  | 0.15  | -0.07 | -0.01 | 0.014 | 0.00013  | 0.00043  | 0.55     | NA | NA | NA | NA |
| 0.06  | 0.05  | -0.02 | 0.05  | 0.016 | 0.035    | 0.1      | 4.60E-06 | NA | NA | NA | NA |
| 0.11  | -0.05 | -0.01 | 0.14  | 0.017 | 0.16     | 0.74     | 2.00E-06 | NA | NA | NA | NA |
| 0.09  | 0.08  | -0.05 | -0.04 | 0.018 | 0.03     | 0.024    | 0.046    | NA | NA | NA | NA |
| 0.08  | 0.07  | -0.03 | 0     | 0.018 | 0.0053   | 0.042    | 0.94     | NA | NA | NA | NA |
| 0.13  | 0.04  | -0.06 | 0.03  | 0.018 | 0.4      | 0.0086   | 0.32     | NA | NA | NA | NA |
| 0.12  | 0.18  | -0.07 | -0.03 | 0.018 | 0.0023   | 0.0032   | 0.3      | NA | NA | NA | NA |
| 0.35  | NA    | 0     | 0.11  | 0.019 | NA       | 1        | 0.0045   | NA | NA | NA | NA |
| 0.11  | 0.02  | -0.03 | 0.07  | 0.019 | 0.64     | 0.14     | 0.00018  | NA | NA | NA | NA |
| 0.28  | 0.02  | -0.04 | 0.01  | 0.019 | 0.87     | 0.03     | 0.59     | NA | NA | NA | NA |
| -0.08 | -0.03 | -0.01 | -0.01 | 0.02  | 0.42     | 0.66     | 0.77     | NA | NA | NA | NA |
| 0.08  | 0.12  | 0.05  | 0.06  | 0.022 | 1.80E-05 | 0.02     | 0.0074   | NA | NA | NA | NA |
| -0.21 | 0.08  | 0.01  | 0.11  | 0.022 | 0.54     | 0.82     | 8.70E-05 | NA | NA | NA | NA |
| -0.16 | -0.18 | -0.03 | 0.05  | 0.023 | 0.003    | 0.46     | 0.096    | NA | NA | NA | NA |
| 0.08  | 0.06  | 0.02  | 0.05  | 0.023 | 0.069    | 0.62     | 0.054    | NA | NA | NA | NA |
| 0.86  | -0.02 | -0.05 | 0.8   | 0.024 | 1        | 0.64     | 5.30E-06 | NA | NA | NA | NA |
| -0.11 | -0.01 | -0.01 | 0.02  | 0.024 | 0.96     | 0.67     | 0.27     | NA | NA | NA | NA |
| 0.07  | 0.1   | -0.01 | 0     | 0.025 | 0.00032  | 0.71     | 0.94     | NA | NA | NA | NA |
| 0.09  | 0.11  | -0.05 | 0.03  | 0.027 | 0.0016   | 0.0098   | 0.12     | NA | NA | NA | NA |
| 0.06  | 0     | -0.06 | 0.01  | 0.029 | 1        | 1.70E-05 | 0.72     | NA | NA | NA | NA |
| -0.09 | -0.09 | -0.01 | 0.05  | 0.029 | 0.016    | 0.53     | 0.018    | NA | NA | NA | NA |

|       |       |       |       |       |          |          |          |    |    |    |    |
|-------|-------|-------|-------|-------|----------|----------|----------|----|----|----|----|
| -0.17 | 0.69  | -0.05 | 0.08  | 0.031 | 0.69     | 0.095    | 0.046    | NA | NA | NA | NA |
| 0.03  | 0.02  | 0.01  | 0.05  | 0.032 | 0.13     | 0.49     | 2.80E-06 | NA | NA | NA | NA |
| -0.06 | 0.16  | -0.04 | 0     | 0.033 | 6.30E-06 | 0.037    | 0.95     | NA | NA | NA | NA |
| 0.06  | 0.06  | -0.04 | 0.01  | 0.033 | 0.002    | 0.0065   | 0.72     | NA | NA | NA | NA |
| 0.04  | 0     | -0.04 | 0.02  | 0.034 | 0.92     | 4.10E-06 | 0.073    | NA | NA | NA | NA |
| -0.1  | -0.02 | 0.01  | -0.02 | 0.034 | 0.58     | 0.83     | 0.093    | NA | NA | NA | NA |
| 0.18  | -0.06 | -0.02 | 0.1   | 0.037 | 0.77     | 0.31     | 0.001    | NA | NA | NA | NA |
| -0.54 | -0.23 | -0.04 | 0.13  | 0.038 | 0.36     | 0.58     | 0.049    | NA | NA | NA | NA |
| 0.04  | 0.09  | -0.08 | 0.02  | 0.04  | 1.70E-07 | 1.20E-09 | 0.28     | NA | NA | NA | NA |
| -0.21 | -0.23 | -0.09 | -0.07 | 0.041 | 0.00041  | 0.00012  | 0.0077   | NA | NA | NA | NA |
| 0.11  | -0.03 | -0.06 | -0.08 | 0.043 | 0.65     | 0.0011   | 0.00019  | NA | NA | NA | NA |
| 0.07  | 0.04  | -0.05 | -0.05 | 0.044 | 0.3      | 0.047    | 0.0081   | NA | NA | NA | NA |
| 0.05  | 0.04  | -0.06 | 0     | 0.047 | 0.1      | 1.70E-05 | 1        | NA | NA | NA | NA |
| 0.08  | 0.04  | -0.02 | 0.05  | 0.047 | 0.091    | 0.34     | 0.0039   | NA | NA | NA | NA |
| 0.59  | -0.12 | -0.15 | -0.1  | 0.051 | 0.37     | 0.0083   | 0.18     | NA | NA | NA | NA |
| 0.44  | -0.12 | 0.33  | 0.17  | 0.053 | 0.57     | 0.0036   | 0.42     | NA | NA | NA | NA |
| -0.09 | -0.07 | 0.02  | 0.03  | 0.061 | 0.14     | 0.39     | 0.18     | NA | NA | NA | NA |
| 0.21  | -0.1  | -0.03 | 0.23  | 0.062 | 0.53     | 0.64     | 0.0076   | NA | NA | NA | NA |
| -0.06 | 0.03  | -0.07 | -0.03 | 0.064 | 0.4      | 2.00E-05 | 0.072    | NA | NA | NA | NA |
| 0.16  | 0.04  | 0.06  | 0.05  | 0.064 | 0.98     | 0.02     | 0.052    | NA | NA | NA | NA |
| -0.1  | -0.04 | -0.04 | -0.04 | 0.069 | 0.68     | 0.087    | 0.092    | NA | NA | NA | NA |
| 0.07  | 0.12  | -0.04 | -0.02 | 0.07  | 0.00046  | 0.043    | 0.41     | NA | NA | NA | NA |
| 0.09  | 0.02  | -0.03 | -0.04 | 0.073 | 0.71     | 0.11     | 0.048    | NA | NA | NA | NA |
| 0.06  | -0.03 | -0.05 | 0     | 0.074 | 0.2      | 0.0012   | 0.82     | NA | NA | NA | NA |
| 0.14  | 0.07  | 0     | 0.02  | 0.075 | 0.56     | 0.97     | 0.31     | NA | NA | NA | NA |
| 0.09  | 0.03  | -0.07 | 0.01  | 0.076 | 0.71     | 0.00028  | 0.73     | NA | NA | NA | NA |
| 0.04  | 0.01  | -0.05 | -0.05 | 0.078 | 0.63     | 0.009    | 0.0015   | NA | NA | NA | NA |
| 0.79  | 0.22  | 0.02  | 0.01  | 0.081 | 0.12     | 0.74     | 0.81     | NA | NA | NA | NA |
| 0.11  | 0.13  | -0.01 | 0.01  | 0.081 | 0.001    | 0.79     | 0.65     | NA | NA | NA | NA |
| -0.05 | 0.08  | -0.02 | 0.01  | 0.083 | 0.026    | 0.26     | 0.47     | NA | NA | NA | NA |



|       |       |       |       |       |          |          |          |    |    |    |    |
|-------|-------|-------|-------|-------|----------|----------|----------|----|----|----|----|
| 0.04  | 0.02  | -0.03 | 0.01  | 0.088 | 0.26     | 0.0033   | 0.32     | NA | NA | NA | NA |
| -0.07 | 0     | -0.07 | -0.03 | 0.088 | 1        | 0.0062   | 0.27     | NA | NA | NA | NA |
| 0.08  | -0.05 | -0.01 | 0     | 0.089 | 0.46     | 0.97     | 1        | NA | NA | NA | NA |
| 0.04  | 0.04  | -0.02 | 0.01  | 0.091 | 0.052    | 0.033    | 0.24     | NA | NA | NA | NA |
| 0.23  | 0.25  | 0.01  | 0.01  | 0.091 | 0.1      | 0.97     | 1        | NA | NA | NA | NA |
| 0.05  | 0.05  | 0     | 0.08  | 0.097 | 0.09     | 0.96     | 6.70E-07 | NA | NA | NA | NA |
| 0.03  | 0.01  | -0.05 | -0.04 | 0.098 | 0.5      | 7.00E-04 | 0.002    | NA | NA | NA | NA |
| 0.49  | -0.3  | -0.06 | -0.08 | 0.1   | 4.90E-06 | 0.055    | 0.0022   | NA | NA | NA | NA |
| 0.1   | 0.03  | -0.06 | -0.05 | 0.1   | 0.55     | 0.0021   | 0.028    | NA | NA | NA | NA |
| 0.32  | 0.02  | -0.04 | 0.02  | 0.11  | 0.79     | 0.38     | 0.58     | NA | NA | NA | NA |
| 0.07  | 0.07  | -0.02 | 0.05  | 0.11  | 0.039    | 0.43     | 0.029    | NA | NA | NA | NA |
| 0.03  | 0.07  | -0.06 | -0.01 | 0.11  | 0.00059  | 5.60E-07 | 0.44     | NA | NA | NA | NA |
| 0.1   | 0.04  | -0.04 | 0.02  | 0.11  | 0.61     | 0.1      | 0.28     | NA | NA | NA | NA |
| -0.09 | -0.04 | -0.06 | -0.02 | 0.11  | 0.42     | 0.03     | 0.46     | NA | NA | NA | NA |
| -0.06 | -0.11 | 0.01  | 0.03  | 0.12  | 2.50E-05 | 0.56     | 0.032    | NA | NA | NA | NA |
| 0.06  | 0.05  | -0.05 | 0.12  | 0.12  | 0.074    | 0.21     | 0.055    | NA | NA | NA | NA |
| 0.05  | 0.04  | -0.04 | -0.04 | 0.12  | 0.038    | 0.0095   | 0.021    | NA | NA | NA | NA |
| 0.08  | -0.03 | -0.03 | 0     | 0.13  | 0.64     | 0.12     | 1        | NA | NA | NA | NA |
| 0.04  | 0.11  | -0.05 | -0.01 | 0.13  | 6.00E-05 | 0.00054  | 0.69     | NA | NA | NA | NA |
| 0.06  | 0.03  | 0.04  | 0.03  | 0.14  | 0.33     | 0.016    | 0.12     | NA | NA | NA | NA |
| 0.08  | 0.08  | -0.05 | 0.02  | 0.14  | 0.24     | 0.036    | 0.57     | NA | NA | NA | NA |
| 0.1   | 0.02  | -0.07 | 0     | 0.14  | 0.46     | 2.10E-06 | 0.9      | NA | NA | NA | NA |
| 0.12  | 0.19  | -0.02 | 0.06  | 0.14  | 0.036    | 0.64     | 0.21     | NA | NA | NA | NA |
| 0.04  | 0.01  | 0.01  | 0.08  | 0.14  | 0.63     | 0.64     | 0.0044   | NA | NA | NA | NA |
| 0.17  | 0.28  | -0.09 | 0.01  | 0.15  | 0.00013  | 0.00048  | 0.79     | NA | NA | NA | NA |
| -0.04 | 0.08  | -0.03 | 0     | 0.15  | 0.014    | 0.15     | 0.91     | NA | NA | NA | NA |
| 0.21  | 0.01  | -0.07 | -0.03 | 0.15  | 1        | 0.14     | 0.57     | NA | NA | NA | NA |
| 0.05  | 0.04  | -0.05 | 0     | 0.15  | 0.11     | 0.015    | 0.98     | NA | NA | NA | NA |
| 0.06  | 0.05  | -0.07 | -0.02 | 0.16  | 0.12     | 0.00057  | 0.39     | NA | NA | NA | NA |
| 0.07  | 0.06  | -0.08 | 0     | 0.16  | 0.21     | 0.00081  | 1        | NA | NA | NA | NA |

|       |       |       |       |      |          |          |          |    |    |    |    |
|-------|-------|-------|-------|------|----------|----------|----------|----|----|----|----|
| -0.29 | -0.32 | -0.01 | 0.07  | 0.16 | 0.15     | 1        | 0.4      | NA | NA | NA | NA |
| 0.05  | 0.02  | -0.08 | -0.05 | 0.16 | 0.39     | 6.50E-08 | 0.005    | NA | NA | NA | NA |
| 0.1   | 0.04  | -0.06 | -0.07 | 0.17 | 0.26     | 0.0024   | 0.00086  | NA | NA | NA | NA |
| -0.06 | 0.07  | 0.01  | 0.02  | 0.17 | 0.044    | 0.61     | 0.26     | NA | NA | NA | NA |
| 0.13  | 0.01  | -0.02 | 0.05  | 0.17 | 1        | 0.31     | 0.12     | NA | NA | NA | NA |
| 0.05  | 0.03  | -0.02 | 0.07  | 0.17 | 0.27     | 0.24     | 0.0014   | NA | NA | NA | NA |
| 0.09  | 0.23  | -0.04 | 0     | 0.18 | 0.00012  | 0.033    | 0.93     | NA | NA | NA | NA |
| 0.08  | 0.21  | -0.08 | -0.03 | 0.18 | 0.0011   | 0.00078  | 0.37     | NA | NA | NA | NA |
| 0.06  | 0.04  | 0.11  | 0.11  | 0.18 | 0.32     | 0.00076  | 0.00015  | NA | NA | NA | NA |
| -0.25 | -0.31 | 0     | 0.15  | 0.18 | 0.011    | 1        | 3.10E-06 | NA | NA | NA | NA |
| -0.17 | -0.01 | -0.01 | 0.13  | 0.19 | 1        | 0.63     | 0.00026  | NA | NA | NA | NA |
| 0.06  | 0.07  | -0.02 | 0.01  | 0.19 | 0.036    | 0.046    | 0.45     | NA | NA | NA | NA |
| 0.12  | -0.11 | -0.01 | 0.04  | 0.2  | 0.18     | 0.74     | 0.07     | NA | NA | NA | NA |
| -0.04 | 0.01  | 0.05  | 0.02  | 0.2  | 1        | 0.044    | 0.31     | NA | NA | NA | NA |
| -0.05 | -0.01 | -0.01 | 0     | 0.2  | 0.92     | 0.94     | 1        | NA | NA | NA | NA |
| 0.08  | 0.05  | -0.01 | 0.03  | 0.2  | 0.012    | 0.73     | 0.099    | NA | NA | NA | NA |
| 0.07  | 0.22  | 0.01  | 0.11  | 0.21 | 2.10E-06 | 0.68     | 4.90E-08 | NA | NA | NA | NA |
| -0.07 | -0.02 | 0     | 0.04  | 0.21 | 0.9      | 0.93     | 0.097    | NA | NA | NA | NA |
| 0.39  | NA    | -0.05 | 0.02  | 0.21 | NA       | 0.26     | 0.8      | NA | NA | NA | NA |
| 0.05  | 0.08  | -0.04 | 0.03  | 0.21 | 8.00E-04 | 0.044    | 0.35     | NA | NA | NA | NA |
| 0.07  | 0.05  | 0     | -0.02 | 0.21 | 0.12     | 1        | 0.5      | NA | NA | NA | NA |
| -0.83 | -0.59 | -0.01 | -0.04 | 0.21 | 0.41     | 0.98     | 0.9      | NA | NA | NA | NA |
| 0.1   | 0.13  | -0.02 | 0.02  | 0.22 | 0.0025   | 0.53     | 0.55     | NA | NA | NA | NA |
| 0.03  | 0.02  | -0.07 | 0     | 0.22 | 0.47     | 6.70E-07 | 0.96     | NA | NA | NA | NA |
| 0.04  | 0.05  | 0     | 0.03  | 0.22 | 0.079    | 1        | 0.13     | NA | NA | NA | NA |
| 0.11  | 0.17  | -0.02 | -0.03 | 0.23 | 0.01     | 0.49     | 0.34     | NA | NA | NA | NA |
| 0.05  | 0.13  | -0.01 | 0.02  | 0.24 | 4.00E-04 | 0.76     | 0.32     | NA | NA | NA | NA |
| 0.06  | 0.01  | -0.02 | 0     | 0.25 | 0.83     | 0.25     | 0.9      | NA | NA | NA | NA |
| -0.08 | -0.05 | -0.02 | 0.05  | 0.25 | 0.38     | 0.22     | 0.046    | NA | NA | NA | NA |
| 0.05  | 0.1   | 0.06  | 0.04  | 0.26 | 0.011    | 0.00063  | 0.0062   | NA | NA | NA | NA |

|       |       |       |       |      |          |          |          |    |    |    |    |
|-------|-------|-------|-------|------|----------|----------|----------|----|----|----|----|
| 0.04  | 0     | -0.07 | 0     | 0.26 | 1        | 0.00012  | 0.91     | NA | NA | NA | NA |
| 0.14  | 0.84  | -0.01 | 0.28  | 0.27 | 3.80E-05 | 0.84     | 3.10E-07 | NA | NA | NA | NA |
| 0.88  | -0.01 | 0.01  | 0     | 0.27 | 0.95     | 0.94     | 1        | NA | NA | NA | NA |
| 0.29  | 0.17  | -0.14 | 0.08  | 0.28 | 0.21     | 0.37     | 0.86     | NA | NA | NA | NA |
| 0.04  | 0.08  | -0.02 | 0.04  | 0.28 | 0.038    | 0.32     | 0.13     | NA | NA | NA | NA |
| -0.08 | -0.01 | -0.1  | -0.04 | 0.28 | 0.93     | 0.00011  | 0.24     | NA | NA | NA | NA |
| 0.02  | 0.1   | -0.03 | 0.03  | 0.29 | 3.70E-06 | 0.066    | 0.063    | NA | NA | NA | NA |
| -0.06 | 0     | -0.06 | -0.03 | 0.29 | 1        | 2.70E-06 | 0.044    | NA | NA | NA | NA |
| 0.03  | -0.02 | -0.03 | 0.03  | 0.29 | 0.28     | 0.012    | 0.043    | NA | NA | NA | NA |
| 0.04  | 0.11  | -0.06 | -0.02 | 0.29 | 0.0028   | 0.015    | 0.53     | NA | NA | NA | NA |
| -0.06 | -0.01 | -0.07 | -0.01 | 0.29 | 1        | 0.049    | 0.89     | NA | NA | NA | NA |
| 0.04  | 0.02  | -0.05 | 0     | 0.3  | 0.45     | 0.023    | 0.92     | NA | NA | NA | NA |
| 0.14  | -0.02 | -0.04 | 0.01  | 0.3  | 0.52     | 0.17     | 0.6      | NA | NA | NA | NA |
| 0.12  | 0.22  | -0.05 | 0.02  | 0.3  | 0.13     | 0.17     | 0.82     | NA | NA | NA | NA |
| 0.06  | 0.08  | -0.03 | 0.02  | 0.31 | 0.12     | 0.088    | 0.38     | NA | NA | NA | NA |
| 0.21  | 0.04  | -0.04 | -0.04 | 0.31 | 0.77     | 0.31     | 0.28     | NA | NA | NA | NA |
| 0.05  | 0.05  | -0.04 | 0     | 0.31 | 0.33     | 0.023    | 0.93     | NA | NA | NA | NA |
| 0.88  | 0.88  | -0.06 | 0.01  | 0.31 | 3.40E-06 | 0.16     | 1        | NA | NA | NA | NA |
| 0.12  | 0.01  | -0.08 | 0.06  | 0.32 | 1        | 0.27     | 0.63     | NA | NA | NA | NA |
| 0.05  | -0.08 | -0.02 | 0.03  | 0.32 | 0.043    | 0.33     | 0.087    | NA | NA | NA | NA |
| 0.86  | NA    | -0.05 | -0.11 | 0.33 | NA       | 0.58     | 0.11     | NA | NA | NA | NA |
| 0.02  | 0.01  | -0.05 | -0.01 | 0.33 | 0.48     | 8.50E-06 | 0.33     | NA | NA | NA | NA |
| -0.14 | -0.12 | -0.02 | -0.02 | 0.33 | 0.41     | 0.67     | 0.54     | NA | NA | NA | NA |
| 0.02  | 0.01  | -0.01 | 0     | 0.33 | 0.45     | 0.36     | 1        | NA | NA | NA | NA |
| 0.02  | 0.08  | -0.01 | 0.01  | 0.34 | 0.00041  | 0.49     | 0.41     | NA | NA | NA | NA |
| 0.05  | 0.02  | -0.01 | 0.03  | 0.34 | 0.74     | 0.61     | 0.084    | NA | NA | NA | NA |
| -0.13 | -0.09 | -0.06 | 0.02  | 0.34 | 0.19     | 0.12     | 0.95     | NA | NA | NA | NA |
| 0.22  | -0.08 | -0.05 | 0.03  | 0.34 | 0.82     | 0.16     | 0.39     | NA | NA | NA | NA |
| 0.11  | 0.2   | -0.02 | 0.01  | 0.35 | 0.0068   | 0.52     | 0.72     | NA | NA | NA | NA |
| 0.1   | -0.05 | -0.04 | 0.27  | 0.36 | 0.59     | 0.27     | 5.00E-05 | NA | NA | NA | NA |

|       |       |       |       |      |          |          |        |    |    |    |    |
|-------|-------|-------|-------|------|----------|----------|--------|----|----|----|----|
| -0.04 | -0.04 | -0.04 | 0.02  | 0.36 | 0.061    | 0.013    | 0.23   | NA | NA | NA | NA |
| 0.05  | -0.01 | -0.05 | -0.04 | 0.37 | 0.88     | 0.036    | 0.15   | NA | NA | NA | NA |
| 0.05  | 0.11  | -0.01 | 0.06  | 0.37 | 0.0072   | 0.8      | 0.0012 | NA | NA | NA | NA |
| -0.06 | 0.24  | -0.06 | 0.2   | 0.38 | 0.032    | 0.36     | 0.0083 | NA | NA | NA | NA |
| 0.03  | 0.02  | -0.02 | 0     | 0.38 | 0.55     | 0.04     | 0.84   | NA | NA | NA | NA |
| 0.07  | -0.01 | 0     | 0.04  | 0.38 | 1        | 0.98     | 0.029  | NA | NA | NA | NA |
| 0.03  | 0.02  | -0.03 | 0     | 0.39 | 0.47     | 0.007    | 0.92   | NA | NA | NA | NA |
| -0.67 | NA    | 0.13  | -0.01 | 0.39 | NA       | 0.34     | 1      | NA | NA | NA | NA |
| -0.04 | 0.12  | 0.02  | 0.05  | 0.39 | 0.011    | 0.23     | 0.01   | NA | NA | NA | NA |
| -0.04 | -0.03 | -0.04 | -0.03 | 0.4  | 0.43     | 0.077    | 0.18   | NA | NA | NA | NA |
| -0.03 | -0.03 | -0.03 | -0.01 | 0.4  | 0.33     | 0.022    | 0.66   | NA | NA | NA | NA |
| -0.04 | 0.04  | 0.01  | 0.04  | 0.4  | 0.28     | 0.88     | 0.12   | NA | NA | NA | NA |
| 0.03  | 0.08  | -0.05 | 0.01  | 0.4  | 0.008    | 0.086    | 0.77   | NA | NA | NA | NA |
| 0.03  | 0.08  | -0.02 | 0.02  | 0.41 | 2.00E-04 | 0.22     | 0.13   | NA | NA | NA | NA |
| 0.11  | -0.02 | -0.09 | 0     | 0.41 | 1        | 0.014    | 1      | NA | NA | NA | NA |
| 0.04  | 0.09  | -0.03 | 0     | 0.42 | 0.034    | 0.16     | 0.91   | NA | NA | NA | NA |
| 0.44  | 0.2   | -0.06 | -0.07 | 0.42 | 0.042    | 0.36     | 0.25   | NA | NA | NA | NA |
| 0.04  | 0.03  | 0.01  | 0.04  | 0.44 | 0.53     | 0.74     | 0.026  | NA | NA | NA | NA |
| 0.11  | -0.08 | -0.12 | -0.03 | 0.44 | 0.45     | 0.00085  | 0.71   | NA | NA | NA | NA |
| 0.02  | 0     | -0.03 | -0.01 | 0.45 | 1        | 0.038    | 0.7    | NA | NA | NA | NA |
| 0.03  | 0.12  | -0.06 | 0.01  | 0.45 | 0.0018   | 0.0012   | 0.79   | NA | NA | NA | NA |
| -0.04 | -0.03 | -0.05 | 0.01  | 0.46 | 0.5      | 0.0081   | 0.73   | NA | NA | NA | NA |
| 0.09  | 0.15  | -0.06 | -0.05 | 0.46 | 0.12     | 0.27     | 0.31   | NA | NA | NA | NA |
| 0.1   | 0.38  | -0.09 | -0.04 | 0.46 | 0.01     | 0.0035   | 0.23   | NA | NA | NA | NA |
| -0.05 | 0.02  | 0.03  | 0.07  | 0.47 | 0.88     | 0.33     | 0.036  | NA | NA | NA | NA |
| 0.01  | 0.04  | -0.03 | 0.01  | 0.47 | 0.0046   | 2.90E-06 | 0.23   | NA | NA | NA | NA |
| -0.05 | -0.01 | -0.08 | -0.02 | 0.48 | 0.98     | 9.60E-07 | 0.21   | NA | NA | NA | NA |
| -0.04 | 0.06  | -0.03 | 0     | 0.48 | 0.094    | 0.12     | 0.86   | NA | NA | NA | NA |
| 0.04  | 0.02  | -0.07 | -0.02 | 0.48 | 0.84     | 0.001    | 0.52   | NA | NA | NA | NA |
| -0.03 | -0.03 | 0     | 0.03  | 0.49 | 0.4      | 1        | 0.18   | NA | NA | NA | NA |

|       |       |       |       |      |          |          |          |    |    |    |    |
|-------|-------|-------|-------|------|----------|----------|----------|----|----|----|----|
| -0.04 | 0.12  | -0.04 | -0.02 | 0.5  | 0.0099   | 0.26     | 0.61     | NA | NA | NA | NA |
| 0.01  | 0.05  | 0     | 0.04  | 0.5  | 0.0025   | 0.84     | 5.40E-05 | NA | NA | NA | NA |
| -0.03 | -0.03 | -0.01 | 0.11  | 0.5  | 0.3      | 0.77     | 9.20E-08 | NA | NA | NA | NA |
| 0.02  | 0.03  | -0.05 | 0     | 0.5  | 0.084    | 0.00091  | 1        | NA | NA | NA | NA |
| 0.04  | 0.07  | -0.05 | -0.02 | 0.51 | 0.12     | 0.009    | 0.39     | NA | NA | NA | NA |
| 0.03  | 0.02  | 0.01  | 0.07  | 0.52 | 0.77     | 0.84     | 0.0064   | NA | NA | NA | NA |
| -0.03 | 0.14  | -0.09 | -0.09 | 0.52 | 0.0099   | 0.0073   | 0.0028   | NA | NA | NA | NA |
| -0.02 | -0.02 | 0     | 0     | 0.52 | 0.54     | 1        | 0.8      | NA | NA | NA | NA |
| 0.05  | NA    | -0.04 | 0.04  | 0.53 | NA       | 0.18     | 0.21     | NA | NA | NA | NA |
| -0.02 | -0.05 | -0.09 | -0.06 | 0.53 | 0.12     | 6.20E-05 | 0.045    | NA | NA | NA | NA |
| -0.05 | 0.12  | 0     | 0     | 0.53 | 0.021    | 1        | 1        | NA | NA | NA | NA |
| 0.02  | 0.03  | 0     | 0     | 0.53 | 0.099    | 0.87     | 0.8      | NA | NA | NA | NA |
| 0.05  | 0.03  | -0.21 | -0.17 | 0.53 | 0.67     | 8.70E-09 | 1.60E-05 | NA | NA | NA | NA |
| 0.01  | 0.01  | -0.07 | -0.03 | 0.53 | 0.69     | 4.00E-09 | 0.0075   | NA | NA | NA | NA |
| 0.12  | 0.17  | -0.06 | 0.03  | 0.53 | 0.57     | 0.075    | 0.51     | NA | NA | NA | NA |
| -0.03 | 0.02  | -0.02 | 0.05  | 0.53 | 0.58     | 0.22     | 0.0043   | NA | NA | NA | NA |
| -0.02 | 0.05  | -0.03 | 0.01  | 0.53 | 0.014    | 0.079    | 0.53     | NA | NA | NA | NA |
| 0.25  | 0.25  | -0.04 | -0.06 | 0.54 | 0.33     | 0.14     | 0.073    | NA | NA | NA | NA |
| -0.04 | -0.12 | -0.05 | 0     | 0.54 | 0.0072   | 0.11     | 1        | NA | NA | NA | NA |
| -0.78 | -0.21 | 0.11  | 0.4   | 0.55 | 1        | 0.31     | 0.00012  | NA | NA | NA | NA |
| -0.8  | NA    | -0.11 | -0.07 | 0.55 | NA       | 0.021    | 0.26     | NA | NA | NA | NA |
| 0.09  | 0.42  | -0.02 | 0.16  | 0.56 | 0.003    | 0.55     | 4.70E-05 | NA | NA | NA | NA |
| 0.01  | 0.04  | 0.05  | 0.03  | 0.56 | 0.093    | 0.028    | 0.15     | NA | NA | NA | NA |
| -0.03 | 0.27  | -0.11 | -0.07 | 0.57 | 5.70E-06 | 0.0025   | 0.084    | NA | NA | NA | NA |
| 0.02  | 0     | -0.04 | -0.01 | 0.57 | 0.92     | 0.11     | 0.8      | NA | NA | NA | NA |
| 0.04  | 0.02  | -0.08 | -0.04 | 0.57 | 0.7      | 0.0098   | 0.31     | NA | NA | NA | NA |
| -0.02 | 0.06  | -0.07 | -0.04 | 0.58 | 0.031    | 5.30E-08 | 0.03     | NA | NA | NA | NA |
| 0.02  | 0.03  | 0     | 0.07  | 0.58 | 0.6      | 0.92     | 0.00021  | NA | NA | NA | NA |
| -0.16 | 0.4   | 0.01  | 0.07  | 0.58 | 0.47     | 0.98     | 0.26     | NA | NA | NA | NA |
| 0.03  | 0.04  | -0.04 | -0.01 | 0.59 | 0.39     | 0.049    | 0.65     | NA | NA | NA | NA |

|       |       |       |       |      |          |          |          |    |    |    |    |
|-------|-------|-------|-------|------|----------|----------|----------|----|----|----|----|
| 0.02  | 0.07  | -0.12 | -0.05 | 0.59 | 0.087    | 1.60E-09 | 0.036    | NA | NA | NA | NA |
| -0.01 | 0.03  | 0     | 0.02  | 0.6  | 0.21     | 0.78     | 0.097    | NA | NA | NA | NA |
| -0.02 | -0.05 | 0     | 0.02  | 0.61 | 0.13     | 1        | 0.23     | NA | NA | NA | NA |
| 0.04  | 0.04  | -0.04 | 0.04  | 0.62 | 0.44     | 0.095    | 0.16     | NA | NA | NA | NA |
| 0.06  | 0.07  | -0.05 | 0.01  | 0.62 | 0.4      | 0.0068   | 0.7      | NA | NA | NA | NA |
| -0.04 | 0.11  | -0.05 | 0.01  | 0.62 | 0.0066   | 0.032    | 0.77     | NA | NA | NA | NA |
| -0.02 | -0.02 | -0.01 | 0.06  | 0.63 | 0.62     | 0.78     | 0.0021   | NA | NA | NA | NA |
| -0.05 | -0.08 | -0.1  | -0.03 | 0.63 | 0.41     | 3.40E-07 | 0.18     | NA | NA | NA | NA |
| 0.02  | 0.26  | -0.02 | -0.02 | 0.63 | 8.60E-06 | 0.25     | 0.52     | NA | NA | NA | NA |
| 0.02  | 0.05  | -0.06 | 0.02  | 0.63 | 0.0066   | 1.10E-05 | 0.31     | NA | NA | NA | NA |
| 0.22  | -0.22 | -0.03 | 0.06  | 0.63 | 0.0029   | 0.34     | 0.072    | NA | NA | NA | NA |
| 0.02  | 0.04  | -0.04 | 0.11  | 0.64 | 0.22     | 0.019    | 3.10E-07 | NA | NA | NA | NA |
| 0.1   | 0.04  | 0.03  | 0.03  | 0.64 | 0.43     | 0.12     | 0.091    | NA | NA | NA | NA |
| 0.04  | 0.1   | -0.05 | 0.03  | 0.65 | 0.29     | 0.1      | 0.55     | NA | NA | NA | NA |
| 0.01  | -0.05 | -0.01 | -0.01 | 0.67 | 0.0074   | 0.54     | 0.83     | NA | NA | NA | NA |
| -0.07 | 0.56  | -0.07 | 0.08  | 0.67 | 9.50E-05 | 0.16     | 0.16     | NA | NA | NA | NA |
| 0.01  | 0.06  | -0.05 | 0.03  | 0.67 | 0.012    | 5.00E-04 | 0.072    | NA | NA | NA | NA |
| 0.02  | -0.03 | -0.02 | 0.08  | 0.68 | 0.39     | 0.089    | 4.20E-06 | NA | NA | NA | NA |
| -0.04 | -0.01 | -0.02 | -0.02 | 0.68 | 0.89     | 0.76     | 0.7      | NA | NA | NA | NA |
| 0.03  | -0.07 | -0.01 | 0     | 0.69 | 0.048    | 0.43     | 0.86     | NA | NA | NA | NA |
| 0.03  | 0.14  | -0.09 | 0.03  | 0.69 | 0.012    | 0.048    | 0.54     | NA | NA | NA | NA |
| -0.02 | 0.03  | -0.05 | 0     | 0.7  | 0.39     | 0.0066   | 0.9      | NA | NA | NA | NA |
| 0.06  | -0.01 | -0.04 | 0     | 0.7  | 1        | 0.037    | 0.88     | NA | NA | NA | NA |
| 0.03  | 0.29  | -0.18 | -0.23 | 0.7  | 0.00019  | 0.00034  | 4.80E-06 | NA | NA | NA | NA |
| 0.02  | 0.02  | -0.02 | 0.02  | 0.7  | 0.43     | 0.25     | 0.22     | NA | NA | NA | NA |
| 0.06  | 0.01  | 0     | 0.02  | 0.71 | 0.86     | 0.99     | 0.37     | NA | NA | NA | NA |
| 0.01  | 0.01  | -0.01 | 0.02  | 0.71 | 0.68     | 0.34     | 0.086    | NA | NA | NA | NA |
| 0.04  | -0.07 | -0.03 | 0.01  | 0.71 | 0.29     | 0.31     | 0.67     | NA | NA | NA | NA |
| 0.01  | 0.01  | 0.01  | 0.02  | 0.71 | 0.67     | 0.48     | 0.11     | NA | NA | NA | NA |
| 0.04  | 0.13  | -0.08 | 0     | 0.71 | 0.12     | 0.054    | 1        | NA | NA | NA | NA |

|       |       |       |       |      |         |          |          |    |    |    |    |
|-------|-------|-------|-------|------|---------|----------|----------|----|----|----|----|
| -0.02 | 0     | -0.05 | -0.03 | 0.72 | 1       | 0.008    | 0.15     | NA | NA | NA | NA |
| 0.03  | 0.04  | -0.05 | -0.01 | 0.72 | 0.33    | 0.0016   | 0.5      | NA | NA | NA | NA |
| 0.03  | 0.03  | -0.11 | -0.09 | 0.72 | 0.54    | 1.80E-06 | 0.0028   | NA | NA | NA | NA |
| -0.02 | 0.07  | -0.01 | 0.03  | 0.74 | 0.34    | 0.7      | 0.22     | NA | NA | NA | NA |
| 0.01  | 0.06  | -0.01 | 0     | 0.74 | 0.0055  | 0.86     | 1        | NA | NA | NA | NA |
| 0.01  | 0.05  | -0.01 | 0.02  | 0.75 | 0.038   | 0.17     | 0.031    | NA | NA | NA | NA |
| -0.04 | 0.05  | -0.01 | -0.05 | 0.75 | 0.36    | 0.8      | 0.0092   | NA | NA | NA | NA |
| 0.05  | -0.04 | -0.03 | 0.05  | 0.75 | 0.59    | 0.37     | 0.052    | NA | NA | NA | NA |
| 0.03  | 0.17  | -0.12 | -0.11 | 0.75 | 0.037   | 0.00017  | 0.0052   | NA | NA | NA | NA |
| 0.05  | -0.06 | -0.09 | 0.04  | 0.77 | 0.28    | 4.00E-05 | 0.1      | NA | NA | NA | NA |
| -0.02 | -0.01 | -0.06 | -0.02 | 0.77 | 0.65    | 0.00017  | 0.39     | NA | NA | NA | NA |
| 0.01  | 0.05  | 0     | -0.01 | 0.77 | 0.13    | 1        | 0.9      | NA | NA | NA | NA |
| -0.05 | -0.1  | -0.09 | 0.09  | 0.77 | 0.69    | 0.0053   | 0.15     | NA | NA | NA | NA |
| 0.18  | 0.8   | -0.1  | -0.04 | 0.77 | 0.17    | 0.015    | 0.59     | NA | NA | NA | NA |
| -0.02 | 0.01  | -0.02 | -0.01 | 0.77 | 0.86    | 0.33     | 0.76     | NA | NA | NA | NA |
| -0.01 | 0.06  | -0.02 | -0.03 | 0.78 | 0.013   | 0.37     | 0.065    | NA | NA | NA | NA |
| 0.05  | 0.22  | 0.04  | 0.12  | 0.78 | 0.0097  | 0.086    | 1.70E-06 | NA | NA | NA | NA |
| 0.01  | 0.06  | -0.02 | 0     | 0.78 | 0.00021 | 0.22     | 0.83     | NA | NA | NA | NA |
| -0.01 | 0.01  | -0.06 | 0     | 0.78 | 0.93    | 0.056    | 1        | NA | NA | NA | NA |
| 0.23  | 0.07  | -0.02 | -0.02 | 0.79 | 0.41    | 0.44     | 0.67     | NA | NA | NA | NA |
| -0.05 | -0.02 | -0.04 | -0.01 | 0.79 | 1       | 0.2      | 0.87     | NA | NA | NA | NA |
| -0.17 | 0.38  | -0.88 | -0.83 | 0.79 | 0.63    | 4.40E-05 | 7.10E-05 | NA | NA | NA | NA |
| 0.01  | 0.05  | -0.07 | -0.02 | 0.8  | 0.043   | 2.40E-06 | 0.16     | NA | NA | NA | NA |
| -0.01 | -0.03 | -0.03 | 0.01  | 0.81 | 0.2     | 0.0019   | 0.47     | NA | NA | NA | NA |
| -0.01 | 0.07  | -0.06 | -0.01 | 0.81 | 0.014   | 0.00035  | 0.49     | NA | NA | NA | NA |
| -0.02 | -0.01 | -0.06 | -0.01 | 0.81 | 0.97    | 0.0063   | 0.77     | NA | NA | NA | NA |
| 0.01  | 0.02  | -0.02 | -0.01 | 0.81 | 0.37    | 0.46     | 0.78     | NA | NA | NA | NA |
| -0.11 | -0.11 | -0.03 | 0.02  | 0.82 | 0.63    | 0.37     | 0.62     | NA | NA | NA | NA |
| -0.03 | -0.12 | -0.05 | -0.03 | 0.83 | 0.11    | 0.012    | 0.31     | NA | NA | NA | NA |
| 0.01  | 0     | -0.03 | 0     | 0.83 | 1       | 0.033    | 1        | NA | NA | NA | NA |

|       |       |       |       |      |          |          |          |    |    |    |    |
|-------|-------|-------|-------|------|----------|----------|----------|----|----|----|----|
| 0     | 0.02  | -0.03 | 0.01  | 0.83 | 0.1      | 6.00E-04 | 0.38     | NA | NA | NA | NA |
| 0.02  | 0.03  | -0.05 | -0.05 | 0.83 | 0.65     | 0.055    | 0.019    | NA | NA | NA | NA |
| 0.38  | NA    | 0.03  | 0     | 0.84 | NA       | 0.76     | 1        | NA | NA | NA | NA |
| -0.03 | 0.07  | -0.03 | 0.17  | 0.85 | 0.52     | 0.38     | 0.00072  | NA | NA | NA | NA |
| 0.02  | 0.11  | -0.02 | -0.02 | 0.86 | 1.10E-05 | 0.54     | 0.29     | NA | NA | NA | NA |
| -0.01 | 0.01  | 0.02  | 0.05  | 0.86 | 0.92     | 0.39     | 0.03     | NA | NA | NA | NA |
| -0.01 | 0.02  | -0.04 | 0.04  | 0.86 | 0.6      | 0.0055   | 0.038    | NA | NA | NA | NA |
| 0.05  | 0.12  | -0.09 | -0.05 | 0.86 | 0.055    | 4.40E-06 | 0.044    | NA | NA | NA | NA |
| 0.03  | -0.12 | -0.1  | -0.22 | 0.87 | 0.085    | 0.032    | 1.40E-05 | NA | NA | NA | NA |
| -0.03 | -0.01 | -0.06 | 0.04  | 0.88 | 1        | 0.015    | 0.23     | NA | NA | NA | NA |
| 0.01  | 0.01  | -0.05 | 0.05  | 0.88 | 0.88     | 0.0017   | 0.0028   | NA | NA | NA | NA |
| -0.01 | 0.06  | -0.03 | 0.04  | 0.88 | 0.073    | 0.025    | 0.032    | NA | NA | NA | NA |
| 0.09  | -0.05 | -0.01 | 0.09  | 0.88 | 0.61     | 0.87     | 0.06     | NA | NA | NA | NA |
| -0.01 | 0.04  | -0.01 | 0.01  | 0.89 | 0.26     | 0.42     | 0.67     | NA | NA | NA | NA |
| 0.06  | 0.07  | -0.04 | -0.02 | 0.89 | 0.93     | 0.032    | 0.32     | NA | NA | NA | NA |
| 0.04  | 0.31  | 0.12  | 0.15  | 0.89 | 0.082    | 0.24     | 0.22     | NA | NA | NA | NA |
| -0.01 | -0.04 | -0.01 | 0.02  | 0.89 | 0.1      | 0.48     | 0.33     | NA | NA | NA | NA |
| 0.02  | 0.07  | -0.06 | -0.03 | 0.9  | 1.00E-04 | 0.00014  | 0.12     | NA | NA | NA | NA |
| 0.04  | 0.07  | 0.02  | 0.2   | 0.9  | 0.33     | 0.6      | 6.90E-09 | NA | NA | NA | NA |
| 0.01  | 0.02  | -0.01 | 0.01  | 0.91 | 0.38     | 0.68     | 0.41     | NA | NA | NA | NA |
| -0.02 | 0.03  | -0.02 | 0     | 0.91 | 0.64     | 0.4      | 1        | NA | NA | NA | NA |
| 0.02  | 0.02  | 0.02  | -0.02 | 0.92 | 0.45     | 0.73     | 0.71     | NA | NA | NA | NA |
| -0.02 | -0.01 | -0.03 | 0.01  | 0.93 | 0.95     | 0.011    | 0.76     | NA | NA | NA | NA |
| 0.04  | 0.14  | -0.06 | -0.03 | 0.93 | 0.091    | 0.053    | 0.45     | NA | NA | NA | NA |
| -0.01 | 0.07  | -0.04 | 0.02  | 0.93 | 0.017    | 0.016    | 0.29     | NA | NA | NA | NA |
| -0.02 | -0.07 | -0.08 | 0.01  | 0.94 | 0.04     | 2.80E-06 | 0.63     | NA | NA | NA | NA |
| 0.02  | 0.04  | 0     | 0.02  | 0.94 | 0.13     | 1        | 0.17     | NA | NA | NA | NA |
| 0.02  | -0.07 | -0.02 | 0.03  | 0.95 | 0.37     | 0.39     | 0.17     | NA | NA | NA | NA |
| 0.01  | 0.06  | -0.02 | -0.01 | 0.95 | 0.036    | 0.13     | 0.34     | NA | NA | NA | NA |
| 0.02  | 0.06  | -0.03 | -0.02 | 0.95 | 0.39     | 0.24     | 0.68     | NA | NA | NA | NA |



|       |       |       |       |      |          |          |          |    |    |    |    |
|-------|-------|-------|-------|------|----------|----------|----------|----|----|----|----|
| 0.03  | 0.06  | -0.02 | 0.02  | 0.95 | 0.058    | 0.16     | 0.25     | NA | NA | NA | NA |
| 0.01  | 0.06  | -0.03 | 0.01  | 0.95 | 0.12     | 0.011    | 0.31     | NA | NA | NA | NA |
| -0.01 | 0.21  | -0.04 | 0.05  | 0.96 | 0.00019  | 0.097    | 0.09     | NA | NA | NA | NA |
| -0.04 | 0.05  | -0.04 | 0     | 0.96 | 0.55     | 0.029    | 0.97     | NA | NA | NA | NA |
| -0.04 | 0.06  | -0.1  | -0.04 | 0.97 | 1        | 0.087    | 0.72     | NA | NA | NA | NA |
| -0.01 | -0.03 | -0.04 | 0.03  | 0.97 | 0.51     | 0.012    | 0.078    | NA | NA | NA | NA |
| 0.01  | 0.13  | -0.02 | 0.06  | 0.98 | 0.00013  | 0.12     | 0.0018   | NA | NA | NA | NA |
| 0.03  | NA    | -0.03 | -0.08 | 0.98 | NA       | 0.28     | 0.0068   | NA | NA | NA | NA |
| -0.02 | -0.06 | -0.13 | -0.06 | 0.98 | 0.27     | 1.60E-07 | 0.063    | NA | NA | NA | NA |
| 0     | 0.02  | -0.07 | -0.01 | 0.99 | 0.35     | 1.30E-05 | 0.4      | NA | NA | NA | NA |
| 0.02  | 0.05  | -0.1  | -0.04 | 0.99 | 0.25     | 0.011    | 0.37     | NA | NA | NA | NA |
| -0.01 | 0.02  | -0.05 | 0.03  | 1    | 0.78     | 0.00098  | 0.075    | NA | NA | NA | NA |
| 0.01  | -0.3  | -0.15 | 0.39  | 1    | 0.19     | 0.00014  | 0.00034  | NA | NA | NA | NA |
| 0     | NA    | 0.08  | -0.03 | 1    | NA       | 0.11     | 0.61     | NA | NA | NA | NA |
| 0     | -0.04 | -0.04 | -0.02 | 1    | 0.018    | 0.0044   | 0.12     | NA | NA | NA | NA |
| 0.03  | 0.04  | 0.01  | -0.03 | 1    | 0.68     | 0.83     | 0.28     | NA | NA | NA | NA |
| 0     | NA    | NA    | NA    | 1    | NA       | NA       | NA       | NA | NA | NA | NA |
| 0.01  | 0.23  | -0.01 | 0.04  | 1    | 3.70E-05 | 0.68     | 0.052    | NA | NA | NA | NA |
| 0     | 0     | NA    | NA    | 1    | 1        | NA       | NA       | NA | NA | NA | NA |
| 0.01  | -0.05 | -0.03 | 0.03  | 1    | 0.23     | 0.086    | 0.18     | NA | NA | NA | NA |
| -0.02 | -0.01 | 0.05  | 0.19  | 1    | 1        | 0.64     | 0.023    | NA | NA | NA | NA |
| 0.01  | 0.04  | -0.05 | 0.02  | 1    | 0.6      | 0.027    | 0.37     | NA | NA | NA | NA |
| 0.01  | 0.04  | -0.1  | -0.06 | 1    | 0.58     | 0.00016  | 0.018    | NA | NA | NA | NA |
| -0.01 | 0     | -0.07 | 0.01  | 1    | 1        | 0.0045   | 0.74     | NA | NA | NA | NA |
| 0     | -0.02 | -0.02 | 0.07  | 1    | 0.38     | 0.12     | 2.30E-09 | NA | NA | NA | NA |
| 0.02  | 0.02  | -0.06 | -0.03 | 1    | 0.9      | 0.075    | 0.29     | NA | NA | NA | NA |
| 0.06  | -0.01 | -0.03 | -0.03 | 1    | 1        | 0.17     | 0.29     | NA | NA | NA | NA |
| -0.01 | -0.07 | -0.03 | 0.1   | 1    | 0.38     | 0.55     | 0.0078   | NA | NA | NA | NA |
| 0     | 0.08  | -0.03 | 0.01  | 1    | 0.012    | 0.17     | 0.6      | NA | NA | NA | NA |
| 0     | 0.01  | -0.03 | 0     | 1    | 1        | 0.18     | 0.97     | NA | NA | NA | NA |

|       |       |       |       |   |          |          |         |    |    |    |    |
|-------|-------|-------|-------|---|----------|----------|---------|----|----|----|----|
| 0     | 0     | -0.04 | 0.04  | 1 | 1        | 0.014    | 0.033   | NA | NA | NA | NA |
| 0.01  | 0.05  | 0.01  | 0.01  | 1 | 0.15     | 0.79     | 0.6     | NA | NA | NA | NA |
| 0     | 0.06  | -0.02 | 0.03  | 1 | 0.056    | 0.1      | 0.029   | NA | NA | NA | NA |
| 0     | -0.39 | -0.59 | -0.36 | 1 | 0.076    | 0.0015   | 0.11    | NA | NA | NA | NA |
| -0.02 | 0.46  | 0     | 0     | 1 | 9.40E-06 | 1        | 0.96    | NA | NA | NA | NA |
| -0.01 | -0.19 | -0.08 | -0.09 | 1 | 0.15     | 0.16     | 0.21    | NA | NA | NA | NA |
| -0.03 | 0.09  | 0.01  | 0.05  | 1 | 1        | 0.76     | 0.013   | NA | NA | NA | NA |
| 0.01  | NA    | -0.01 | -0.11 | 1 | NA       | 0.89     | 0.0071  | NA | NA | NA | NA |
| -0.01 | -0.07 | -0.07 | -0.01 | 1 | 0.32     | 0.00022  | 0.53    | NA | NA | NA | NA |
| 0     | -0.01 | -0.05 | -0.02 | 1 | 1        | 0.018    | 0.26    | NA | NA | NA | NA |
| -0.05 | -0.05 | -0.14 | -0.06 | 1 | 1        | 0.00063  | 0.15    | NA | NA | NA | NA |
| 0.02  | 0.22  | 0.13  | NA    | 1 | 0.3      | 0.53     | NA      | NA | NA | NA | NA |
| 0.01  | 0.01  | -0.07 | 0.02  | 1 | 1        | 0.013    | 0.52    | NA | NA | NA | NA |
| -0.01 | -0.02 | -0.02 | 0.04  | 1 | 0.4      | 0.35     | 0.11    | NA | NA | NA | NA |
| -0.01 | -0.03 | -0.19 | -0.18 | 1 | 1        | 0.0014   | 0.0081  | NA | NA | NA | NA |
| 0.03  | 0.01  | -0.04 | 0.01  | 1 | 0.77     | 0.044    | 0.85    | NA | NA | NA | NA |
| 0     | 0.09  | -0.06 | -0.01 | 1 | 0.0011   | 3.60E-06 | 0.45    | NA | NA | NA | NA |
| 0.01  | 0.02  | -0.02 | 0.07  | 1 | 0.76     | 0.24     | 0.00062 | NA | NA | NA | NA |
| -0.01 | -0.13 | -0.09 | -0.06 | 1 | 0.089    | 0.064    | 0.071   | NA | NA | NA | NA |
| -0.06 | -0.14 | -0.01 | -0.03 | 1 | 1        | 0.89     | 0.64    | NA | NA | NA | NA |
| 0     | 0.28  | -0.14 | -0.08 | 1 | 0.011    | 0.0018   | 0.16    | NA | NA | NA | NA |
| 0.08  | 0.28  | -0.04 | 0.03  | 1 | 0.27     | 0.068    | 0.28    | NA | NA | NA | NA |
| 0.01  | -0.03 | -0.06 | -0.02 | 1 | 0.57     | 0.099    | 0.6     | NA | NA | NA | NA |
| 0     | 0     | -0.04 | -0.01 | 1 | 1        | 0.052    | 0.59    | NA | NA | NA | NA |
| 0.01  | -0.17 | -0.03 | 0.03  | 1 | 0.0061   | 0.46     | 0.58    | NA | NA | NA | NA |
| -0.17 | -0.08 | -0.05 | 0.03  | 1 | 0.81     | 0.17     | 0.75    | NA | NA | NA | NA |
| -0.03 | 0.43  | -0.01 | 0.3   | 1 | 0.0041   | 1        | 0.038   | NA | NA | NA | NA |
| -0.03 | -0.1  | -0.01 | 0.06  | 1 | 0.76     | 0.65     | 0.032   | NA | NA | NA | NA |
| -0.01 | -0.12 | -0.02 | 0.03  | 1 | 0.27     | 0.53     | 0.32    | NA | NA | NA | NA |
| 0.03  | 0.01  | -0.06 | 0.1   | 1 | 1        | 0.095    | 0.011   | NA | NA | NA | NA |



|    |       |       |       |    |       |         |         |    |    |    |    |
|----|-------|-------|-------|----|-------|---------|---------|----|----|----|----|
| NA | 0.8   | -0.21 | 0.68  | NA | 0.034 | 0.00029 | 0.00016 | NA | NA | NA | NA |
| NA | NA    | 0     | 0     | NA | NA    | 1       | 1       | NA | NA | NA | NA |
| NA | NA    | -0.27 | NA    | NA | NA    | 0.041   | NA      | NA | NA | NA | NA |
| NA | -0.38 | -0.01 | 0.09  | NA | 0.17  | 0.77    | 0.025   | NA | NA | NA | NA |
| NA | NA    | -0.1  | -0.13 | NA | NA    | 0.86    | 0.79    | NA | NA | NA | NA |
| NA | NA    | NA    | NA    | NA | NA    | NA      | NA      | NA | NA | NA | NA |
| NA | NA    | -0.06 | 0.08  | NA | NA    | 0.28    | 0.17    | NA | NA | NA | NA |
| NA | -0.12 | -0.03 | 0.15  | NA | 1     | 0.44    | 0.05    | NA | NA | NA | NA |
| NA | NA    | 0.02  | 0.1   | NA | NA    | 1       | 0.69    | NA | NA | NA | NA |
| NA | NA    | -0.17 | 0.06  | NA | NA    | 0.34    | 1       | NA | NA | NA | NA |
| NA | NA    | NA    | 0.12  | NA | NA    | NA      | 1       | NA | NA | NA | NA |
| NA | NA    | 0.07  | -0.09 | NA | NA    | 0.31    | 0.07    | NA | NA | NA | NA |
| NA | NA    | -0.06 | -0.03 | NA | NA    | 1       | 1       | NA | NA | NA | NA |
| NA | 0.19  | -0.04 | -0.03 | NA | 0.26  | 0.51    | 0.71    | NA | NA | NA | NA |
| NA | 0.18  | 0.01  | 0.03  | NA | 0.56  | 0.94    | 0.46    | NA | NA | NA | NA |
| NA | -0.06 | -0.02 | 0.23  | NA | 0.4   | 0.5     | 0.0015  | NA | NA | NA | NA |
| NA | NA    | -0.18 | -0.13 | NA | NA    | 0.004   | 0.031   | NA | NA | NA | NA |
| NA | NA    | -0.02 | 0.05  | NA | NA    | 0.6     | 0.65    | NA | NA | NA | NA |
| NA | NA    | -0.04 | -0.01 | NA | NA    | 0.75    | 1       | NA | NA | NA | NA |
| NA | -0.27 | -0.02 | 0.08  | NA | 0.2   | 0.16    | 0.00035 | NA | NA | NA | NA |
| NA | 0.12  | -0.16 | -0.17 | NA | 1     | 0.18    | 0.051   | NA | NA | NA | NA |
| NA | NA    | -0.05 | NA    | NA | NA    | 0.78    | NA      | NA | NA | NA | NA |
| NA | -0.26 | 0     | 0.07  | NA | 0.12  | 1       | 0.0023  | NA | NA | NA | NA |
| NA | NA    | -0.07 | 0.17  | NA | NA    | 0.061   | 0.043   | NA | NA | NA | NA |
| NA | NA    | -0.01 | 0     | NA | NA    | 0.9     | 1       | NA | NA | NA | NA |
| NA | NA    | NA    | NA    | NA | NA    | NA      | NA      | NA | NA | NA | NA |
| NA | NA    | NA    | NA    | NA | NA    | NA      | NA      | NA | NA | NA | NA |
| NA | 0.34  | -0.02 | -0.03 | NA | 0.11  | 0.76    | 0.52    | NA | NA | NA | NA |
| NA | 0     | 0.08  | 0.11  | NA | 1     | 0.21    | 0.061   | NA | NA | NA | NA |
| NA | NA    | -0.4  | NA    | NA | NA    | 0.00093 | NA      | NA | NA | NA | NA |

|      |       |       |       |          |          |          |          |    |    |    |    |
|------|-------|-------|-------|----------|----------|----------|----------|----|----|----|----|
| NA   | NA    | -0.03 | NA    | NA       | NA       | 0.79     | NA       | NA | NA | NA | NA |
| NA   | 0.04  | -0.03 | 0.16  | NA       | 0.85     | 0.25     | 0.00021  | NA | NA | NA | NA |
| NA   | NA    | 0.04  | -0.03 | NA       | NA       | 0.58     | 1        | NA | NA | NA | NA |
| NA   | NA    | -0.05 | 0.18  | NA       | NA       | 0.4      | 0.025    | NA | NA | NA | NA |
| NA   | NA    | -0.33 | -0.35 | NA       | NA       | 7.80E-08 | 3.10E-07 | NA | NA | NA | NA |
| NA   | 0.75  | 0.07  | 0.82  | NA       | 0.013    | 1        | 0.00095  | NA | NA | NA | NA |
| NA   | 0.04  | -0.24 | -0.22 | NA       | 1        | 7.70E-05 | 0.00016  | NA | NA | NA | NA |
| NA   | -0.38 | -0.2  | 0     | NA       | 0.67     | 3.70E-05 | 1        | NA | NA | NA | NA |
| NA   | NA    | -0.12 | -0.11 | NA       | NA       | 0.27     | 1        | NA | NA | NA | NA |
| NA   | 0.18  | 0.04  | 0.11  | NA       | 0.78     | 0.45     | 0.23     | NA | NA | NA | NA |
| NA   | NA    | -0.18 | -0.14 | NA       | NA       | 0.071    | 0.49     | NA | NA | NA | NA |
| NA   | NA    | NA    | NA    | NA       | NA       | NA       | NA       | NA | NA | NA | NA |
| NA   | NA    | -0.01 | -0.05 | NA       | NA       | 1        | 0.98     | NA | NA | NA | NA |
| 0.56 | 0.44  | -0.07 | 0     | 4.40E-09 | 6.50E-06 | 0.00083  | 1        | NA | NA | NA | NA |
| 0.36 | 0.09  | 0.01  | 0.02  | 1.60E-08 | 0.13     | 0.66     | 0.3      | NA | NA | NA | NA |
| 0.12 | 0.03  | -0.05 | -0.02 | 7.80E-08 | 0.055    | 0.0011   | 0.12     | NA | NA | NA | NA |
| 0.31 | 0.01  | -0.04 | -0.06 | 1.50E-07 | 0.85     | 0.19     | 0.038    | NA | NA | NA | NA |
| 0.22 | 0.18  | -0.07 | -0.02 | 5.40E-07 | 9.80E-06 | 0.0014   | 0.32     | NA | NA | NA | NA |
| 0.17 | 0.12  | -0.03 | 0.03  | 6.00E-07 | 1.30E-05 | 0.13     | 0.17     | NA | NA | NA | NA |
| 0.29 | 0.01  | -0.05 | 0.07  | 8.30E-07 | 0.88     | 0.021    | 0.026    | NA | NA | NA | NA |
| 0.35 | 0.03  | -0.05 | -0.05 | 2.10E-06 | 0.87     | 0.031    | 0.04     | NA | NA | NA | NA |
| 0.17 | 0.06  | -0.05 | -0.03 | 8.40E-06 | 0.024    | 0.0011   | 0.059    | NA | NA | NA | NA |
| 0.18 | 0.03  | -0.12 | -0.09 | 1.00E-05 | 0.25     | 1.90E-08 | 0.00028  | NA | NA | NA | NA |
| 0.36 | 0.04  | 0.03  | 0.05  | 1.70E-05 | 0.85     | 0.41     | 0.12     | NA | NA | NA | NA |
| 0.11 | 0.09  | -0.06 | -0.02 | 1.70E-05 | 0.00034  | 0.00085  | 0.37     | NA | NA | NA | NA |
| 0.12 | 0.09  | -0.04 | 0.02  | 2.90E-05 | 3.60E-05 | 0.00082  | 0.043    | NA | NA | NA | NA |
| 0.18 | 0.06  | -0.08 | -0.03 | 3.60E-05 | 0.026    | 1.00E-07 | 0.094    | NA | NA | NA | NA |
| 0.41 | 0.3   | -0.05 | -0.02 | 4.50E-05 | 1.20E-08 | 0.098    | 0.56     | NA | NA | NA | NA |
| 0.09 | 0.12  | -0.03 | 0.05  | 5.10E-05 | 9.20E-05 | 0.27     | 0.097    | NA | NA | NA | NA |
| 0.37 | 0.05  | 0     | 0.07  | 5.40E-05 | 0.26     | 1        | 0.035    | NA | NA | NA | NA |

|       |       |       |       |         |          |          |          |    |    |    |    |
|-------|-------|-------|-------|---------|----------|----------|----------|----|----|----|----|
| 0.25  | -0.04 | 0     | 0.02  | 0.00012 | 0.1      | 1        | 0.26     | NA | NA | NA | NA |
| 0.9   | 0.04  | -0.08 | -0.07 | 0.00013 | 0.48     | 0.081    | 0.24     | NA | NA | NA | NA |
| 0.09  | 0.04  | -0.06 | -0.04 | 0.00016 | 0.055    | 5.70E-05 | 0.0018   | NA | NA | NA | NA |
| 0.19  | 0.12  | -0.09 | 0.03  | 0.00018 | 0.018    | 8.60E-06 | 0.17     | NA | NA | NA | NA |
| 0.17  | 0.03  | -0.05 | 0.03  | 0.00023 | 0.28     | 6.20E-05 | 0.1      | NA | NA | NA | NA |
| -0.12 | 0.04  | 0     | 0.05  | 0.00028 | 0.27     | 0.98     | 0.011    | NA | NA | NA | NA |
| 0.14  | 0.14  | 0     | 0.07  | 0.00031 | 8.30E-06 | 0.93     | 4.20E-05 | NA | NA | NA | NA |
| 0.24  | 0.18  | 0.01  | 0.05  | 0.00042 | 0.0039   | 0.85     | 0.32     | NA | NA | NA | NA |
| 0.06  | 0.11  | 0.04  | 0.05  | 0.00049 | 4.70E-09 | 0.0039   | 0.00037  | NA | NA | NA | NA |
| 0.15  | 0.01  | -0.03 | 0     | 0.00051 | 0.68     | 0.021    | 0.77     | NA | NA | NA | NA |
| 0.39  | 0.3   | -0.04 | -0.03 | 0.00072 | 0.0019   | 0.14     | 0.42     | NA | NA | NA | NA |
| 0.26  | 0.08  | -0.06 | 0.02  | 0.00082 | 0.29     | 0.0013   | 0.39     | NA | NA | NA | NA |
| 0.49  | 0.11  | 0     | -0.02 | 0.0011  | 0.89     | 1        | 0.73     | NA | NA | NA | NA |
| 0.12  | 0     | -0.11 | -0.08 | 0.0012  | 1        | 1.90E-07 | 0.00066  | NA | NA | NA | NA |
| 0.07  | 0.05  | -0.05 | 0.01  | 0.0015  | 0.0029   | 4.30E-05 | 0.62     | NA | NA | NA | NA |
| 0.15  | 0.06  | -0.05 | 0.01  | 0.0018  | 0.0025   | 7.00E-05 | 0.7      | NA | NA | NA | NA |
| 0.11  | -0.01 | -0.01 | 0.03  | 0.0025  | 0.83     | 0.55     | 0.24     | NA | NA | NA | NA |
| 0.24  | 0.29  | -0.02 | -0.01 | 0.0026  | 0.0014   | 0.61     | 0.99     | NA | NA | NA | NA |
| 0.06  | 0.08  | -0.05 | 0.03  | 0.0026  | 0.00031  | 1.70E-05 | 0.16     | NA | NA | NA | NA |
| 0.55  | 0.84  | -0.1  | -0.06 | 0.0029  | 1.00E-04 | 0.038    | 0.37     | NA | NA | NA | NA |
| 0.08  | 0.09  | -0.02 | 0.01  | 0.003   | 9.20E-05 | 0.17     | 0.56     | NA | NA | NA | NA |
| 0.07  | 0.1   | -0.03 | 0.03  | 0.0034  | 7.90E-05 | 0.055    | 0.2      | NA | NA | NA | NA |
| 0.08  | -0.01 | -0.05 | 0.02  | 0.0038  | 0.65     | 2.40E-05 | 0.21     | NA | NA | NA | NA |
| 0.9   | 0.01  | 0.01  | 0.03  | 0.0039  | 1        | 0.65     | 0.21     | NA | NA | NA | NA |
| 0.05  | 0.07  | -0.06 | -0.03 | 0.0054  | 0.00042  | 0.00011  | 0.042    | NA | NA | NA | NA |
| 0.05  | 0.08  | 0     | 0.04  | 0.0063  | 6.60E-06 | 0.65     | 8.10E-05 | NA | NA | NA | NA |
| -0.35 | 0.07  | -0.05 | 0.01  | 0.0073  | 1        | 0.49     | 1        | NA | NA | NA | NA |
| 0.06  | 0.03  | -0.02 | 0.02  | 0.0085  | 0.12     | 0.18     | 0.21     | NA | NA | NA | NA |
| 0.18  | 0.04  | -0.07 | 0.02  | 0.0089  | 0.68     | 2.90E-05 | 0.46     | NA | NA | NA | NA |
| 0.14  | 0.21  | 0.07  | 0.01  | 0.009   | 8.40E-05 | 0.0078   | 0.72     | NA | NA | NA | NA |

|       |       |       |       |        |          |          |          |    |    |    |    |
|-------|-------|-------|-------|--------|----------|----------|----------|----|----|----|----|
| 0.03  | 0.01  | -0.04 | -0.01 | 0.0091 | 0.13     | 0.0093   | 0.64     | NA | NA | NA | NA |
| 0.06  | 0.06  | -0.02 | 0.01  | 0.0095 | 0.00016  | 0.043    | 0.55     | NA | NA | NA | NA |
| -0.12 | -0.1  | -0.07 | 0     | 0.011  | 0.065    | 0.0042   | 0.99     | NA | NA | NA | NA |
| -0.24 | -0.13 | -0.03 | 0.02  | 0.011  | 0.0042   | 0.54     | 0.62     | NA | NA | NA | NA |
| -0.06 | 0.05  | -0.04 | -0.02 | 0.011  | 0.027    | 0.17     | 0.34     | NA | NA | NA | NA |
| -0.88 | 0     | -0.18 | -0.13 | 0.012  | 1        | 0.058    | 0.57     | NA | NA | NA | NA |
| -0.12 | -0.12 | -0.09 | 0.02  | 0.013  | 0.015    | 0.00025  | 0.56     | NA | NA | NA | NA |
| 0.15  | 0.02  | -0.03 | -0.04 | 0.013  | 0.57     | 0.1      | 0.063    | NA | NA | NA | NA |
| 0.13  | -0.03 | 0     | 0.02  | 0.013  | 0.28     | 0.99     | 0.36     | NA | NA | NA | NA |
| 0.06  | 0.05  | -0.02 | 0.01  | 0.014  | 0.13     | 0.073    | 0.51     | NA | NA | NA | NA |
| 0.24  | -0.04 | 0.02  | 0.08  | 0.016  | 0.21     | 0.37     | 0.0012   | NA | NA | NA | NA |
| 0.57  | 0.43  | -0.09 | -0.01 | 0.016  | 0.012    | 0.016    | 0.92     | NA | NA | NA | NA |
| 0.15  | 0.1   | -0.05 | 0     | 0.018  | 0.055    | 0.077    | 1        | NA | NA | NA | NA |
| 0.07  | 0.02  | -0.05 | -0.04 | 0.02   | 0.58     | 0.00083  | 0.0072   | NA | NA | NA | NA |
| 0.07  | 0.01  | 0.01  | 0.04  | 0.021  | 0.79     | 0.65     | 0.031    | NA | NA | NA | NA |
| 0.23  | -0.06 | 0     | 0.07  | 0.022  | 0.38     | 1        | 0.038    | NA | NA | NA | NA |
| 0.17  | 0.07  | -0.05 | 0     | 0.022  | 0.098    | 0.065    | 0.97     | NA | NA | NA | NA |
| 0.15  | 0.31  | -0.05 | 0.12  | 0.022  | 5.60E-07 | 0.12     | 0.0013   | NA | NA | NA | NA |
| 0.11  | 0.05  | -0.06 | 0.12  | 0.022  | 0.35     | 0.027    | 2.00E-05 | NA | NA | NA | NA |
| -0.26 | NA    | -0.09 | -0.02 | 0.023  | NA       | 0.041    | 0.84     | NA | NA | NA | NA |
| -0.22 | -0.26 | 0.11  | 0.03  | 0.024  | 0.0017   | 0.015    | 0.56     | NA | NA | NA | NA |
| 0.34  | NA    | -0.07 | 0.01  | 0.024  | NA       | 0.27     | 0.93     | NA | NA | NA | NA |
| 0.64  | -0.21 | 0.05  | -0.08 | 0.025  | 0.0085   | 0.56     | 0.25     | NA | NA | NA | NA |
| 0.21  | 0.3   | -0.02 | 0.07  | 0.025  | 0.00035  | 0.37     | 0.0071   | NA | NA | NA | NA |
| 0.47  | 0.17  | 0.02  | 0.31  | 0.026  | 0.43     | 0.69     | 4.90E-09 | NA | NA | NA | NA |
| 0.06  | 0.02  | -0.06 | 0.03  | 0.026  | 0.42     | 5.00E-04 | 0.25     | NA | NA | NA | NA |
| 0.11  | 0.03  | -0.01 | 0.05  | 0.028  | 0.34     | 0.62     | 0.048    | NA | NA | NA | NA |
| 0.06  | 0.02  | -0.04 | -0.06 | 0.029  | 0.44     | 0.065    | 0.0023   | NA | NA | NA | NA |
| 0.08  | 0.05  | -0.01 | 0.03  | 0.03   | 0.064    | 0.64     | 0.079    | NA | NA | NA | NA |
| 0.09  | 0.05  | -0.07 | 0.04  | 0.032  | 0.44     | 0.00042  | 0.061    | NA | NA | NA | NA |

|       |       |       |       |       |          |          |          |    |    |    |    |
|-------|-------|-------|-------|-------|----------|----------|----------|----|----|----|----|
| 0.05  | 0.07  | -0.03 | -0.02 | 0.033 | 0.0061   | 0.024    | 0.09     | NA | NA | NA | NA |
| 0.16  | 0.15  | 0.04  | 0.02  | 0.033 | 0.0017   | 0.19     | 0.52     | NA | NA | NA | NA |
| 0.04  | 0.07  | -0.05 | -0.02 | 0.033 | 0.00043  | 7.90E-05 | 0.24     | NA | NA | NA | NA |
| 0.08  | 0.29  | -0.03 | -0.01 | 0.036 | 8.60E-08 | 0.2      | 0.79     | NA | NA | NA | NA |
| 0.1   | 0.04  | -0.04 | -0.01 | 0.037 | 0.13     | 0.041    | 0.76     | NA | NA | NA | NA |
| 0.04  | 0.1   | -0.05 | 0.02  | 0.038 | 1.50E-06 | 0.0015   | 0.33     | NA | NA | NA | NA |
| 0.08  | 0.11  | -0.04 | -0.05 | 0.039 | 0.029    | 0.014    | 0.0059   | NA | NA | NA | NA |
| 0.5   | 0.1   | -0.01 | 0.06  | 0.039 | 0.45     | 0.66     | 0.057    | NA | NA | NA | NA |
| 0.08  | 0.06  | -0.05 | 0.04  | 0.044 | 0.074    | 0.011    | 0.1      | NA | NA | NA | NA |
| 0.06  | 0.08  | 0.02  | 0.1   | 0.045 | 0.51     | 0.58     | 0.014    | NA | NA | NA | NA |
| 0.06  | 0.07  | -0.04 | 0.03  | 0.045 | 0.074    | 0.04     | 0.17     | NA | NA | NA | NA |
| 0.14  | 0.02  | 0.06  | 0.11  | 0.045 | 0.83     | 0.013    | 5.20E-06 | NA | NA | NA | NA |
| 0.17  | 0.04  | 0.02  | 0.08  | 0.049 | 0.39     | 0.55     | 0.00044  | NA | NA | NA | NA |
| 0.21  | 0.15  | 0.03  | 0.14  | 0.051 | 0.21     | 0.6      | 0.025    | NA | NA | NA | NA |
| 0.06  | 0.08  | -0.07 | 0.03  | 0.055 | 0.0084   | 4.30E-06 | 0.069    | NA | NA | NA | NA |
| 0.11  | 0.05  | -0.04 | 0.01  | 0.056 | 0.062    | 0.042    | 0.68     | NA | NA | NA | NA |
| 0.15  | 0.13  | -0.03 | 0.01  | 0.057 | 0.33     | 0.66     | 1        | NA | NA | NA | NA |
| 0.91  | 0.13  | 0.23  | 0.24  | 0.058 | 0.85     | 0.3      | 0.068    | NA | NA | NA | NA |
| -0.04 | -0.06 | -0.04 | -0.04 | 0.06  | 1.30E-06 | 0.0042   | 0.0057   | NA | NA | NA | NA |
| 0.12  | 0.03  | -0.07 | -0.02 | 0.061 | 0.37     | 7.70E-06 | 0.35     | NA | NA | NA | NA |
| 0.19  | NA    | -0.08 | -0.04 | 0.062 | NA       | 0.0033   | 0.24     | NA | NA | NA | NA |
| 0.06  | 0.09  | -0.01 | 0.06  | 0.065 | 0.038    | 0.65     | 0.0026   | NA | NA | NA | NA |
| 0.09  | 0.01  | 0.09  | 0.08  | 0.074 | 1        | 0.0015   | 0.0018   | NA | NA | NA | NA |
| -0.1  | -0.11 | -0.11 | 0.05  | 0.076 | 0.041    | 5.70E-05 | 0.15     | NA | NA | NA | NA |
| 0.11  | -0.02 | -0.02 | 0.06  | 0.078 | 0.59     | 0.37     | 0.0063   | NA | NA | NA | NA |
| 0.08  | 0.09  | -0.05 | 0     | 0.08  | 0.00052  | 0.00027  | 1        | NA | NA | NA | NA |
| 0.07  | 0.18  | -0.01 | 0     | 0.087 | 1.20E-07 | 0.6      | 0.9      | NA | NA | NA | NA |
| -0.22 | -0.24 | -0.11 | -0.07 | 0.09  | 0.00046  | 4.30E-06 | 0.022    | NA | NA | NA | NA |
| 0.16  | 0.03  | 0.01  | 0.07  | 0.097 | 0.74     | 0.91     | 0.038    | NA | NA | NA | NA |
| 0.08  | 0.1   | 0     | 0.04  | 0.1   | 0.013    | 0.93     | 0.032    | NA | NA | NA | NA |



|       |       |       |       |      |          |          |         |    |    |    |    |
|-------|-------|-------|-------|------|----------|----------|---------|----|----|----|----|
| 0.3   | 0.03  | -0.02 | 0     | 0.1  | 1        | 0.81     | 1       | NA | NA | NA | NA |
| 0.11  | 0.16  | -0.07 | -0.05 | 0.1  | 0.018    | 0.0036   | 0.05    | NA | NA | NA | NA |
| -0.07 | -0.03 | -0.01 | 0.03  | 0.11 | 0.58     | 0.54     | 0.086   | NA | NA | NA | NA |
| -0.08 | 0.14  | -0.07 | 0     | 0.11 | 0.055    | 0.0017   | 0.97    | NA | NA | NA | NA |
| 0.21  | 0.06  | -0.06 | 0.05  | 0.11 | 0.91     | 0.17     | 0.45    | NA | NA | NA | NA |
| 0.06  | 0.21  | 0.01  | 0.09  | 0.11 | 3.20E-05 | 0.66     | 0.00021 | NA | NA | NA | NA |
| 0.07  | 0.07  | -0.01 | 0.03  | 0.11 | 0.1      | 0.73     | 0.044   | NA | NA | NA | NA |
| 0.07  | 0.04  | -0.04 | 0.06  | 0.11 | 0.24     | 0.058    | 0.002   | NA | NA | NA | NA |
| 0.08  | 0.03  | -0.04 | 0.01  | 0.11 | 0.4      | 0.016    | 0.86    | NA | NA | NA | NA |
| 0.05  | 0.07  | -0.05 | -0.03 | 0.11 | 0.015    | 0.0015   | 0.11    | NA | NA | NA | NA |
| 0.03  | 0.05  | 0.01  | 0.04  | 0.12 | 0.0082   | 0.69     | 0.015   | NA | NA | NA | NA |
| 0.05  | 0.06  | -0.08 | -0.05 | 0.12 | 0.053    | 2.10E-05 | 0.0059  | NA | NA | NA | NA |
| 0.03  | 0.02  | -0.03 | 0.03  | 0.13 | 0.49     | 0.002    | 0.012   | NA | NA | NA | NA |
| 0.12  | 0     | -0.1  | -0.02 | 0.13 | 1        | 0.01     | 0.84    | NA | NA | NA | NA |
| 0.26  | 0.08  | -0.04 | -0.05 | 0.14 | 0.59     | 0.39     | 0.23    | NA | NA | NA | NA |
| 0.04  | 0.11  | 0.01  | 0.04  | 0.15 | 1.90E-05 | 0.39     | 0.0064  | NA | NA | NA | NA |
| 0.04  | 0.03  | -0.06 | 0.01  | 0.15 | 0.43     | 0.00057  | 0.71    | NA | NA | NA | NA |
| 0.05  | 0.03  | -0.02 | 0     | 0.15 | 0.4      | 0.14     | 0.79    | NA | NA | NA | NA |
| 0.05  | 0.01  | -0.01 | 0.05  | 0.15 | 1        | 0.8      | 0.039   | NA | NA | NA | NA |
| 0.04  | 0.01  | -0.11 | -0.07 | 0.15 | 0.85     | 1.70E-08 | 0.00074 | NA | NA | NA | NA |
| -0.18 | -0.21 | 0.04  | 0.09  | 0.15 | 0.042    | 0.26     | 0.0071  | NA | NA | NA | NA |
| 0.04  | 0.02  | -0.02 | 0     | 0.15 | 0.46     | 0.11     | 0.93    | NA | NA | NA | NA |
| 0.48  | NA    | -0.08 | 0.03  | 0.15 | NA       | 0.1      | 0.74    | NA | NA | NA | NA |
| 0.04  | 0.05  | -0.02 | 0.01  | 0.16 | 0.15     | 0.13     | 0.45    | NA | NA | NA | NA |
| 0.04  | 0.04  | -0.01 | -0.07 | 0.17 | 0.25     | 0.79     | 0.017   | NA | NA | NA | NA |
| 0.08  | 0.08  | -0.06 | -0.02 | 0.17 | 0.15     | 0.03     | 0.39    | NA | NA | NA | NA |
| 0.08  | 0.07  | -0.06 | -0.04 | 0.18 | 0.19     | 0.00092  | 0.063   | NA | NA | NA | NA |
| -0.09 | -0.13 | -0.05 | 0.06  | 0.19 | 0.00034  | 6.70E-05 | 0.00098 | NA | NA | NA | NA |
| 0.03  | 0.06  | 0     | 0.02  | 0.19 | 0.0018   | 1        | 0.32    | NA | NA | NA | NA |
| 0.06  | 0.09  | -0.07 | 0     | 0.19 | 8.90E-06 | 1.20E-05 | 0.81    | NA | NA | NA | NA |

|       |       |       |       |      |          |          |          |    |    |    |    |
|-------|-------|-------|-------|------|----------|----------|----------|----|----|----|----|
| 0.91  | NA    | -0.08 | 0.01  | 0.21 | NA       | 0.074    | 0.97     | NA | NA | NA | NA |
| 0.1   | 0.2   | -0.04 | 0.09  | 0.22 | 0.00027  | 0.11     | 0.0056   | NA | NA | NA | NA |
| 0.07  | 0.02  | -0.08 | 0.16  | 0.22 | 0.9      | 0.12     | 0.14     | NA | NA | NA | NA |
| -0.04 | -0.03 | 0     | 0.03  | 0.23 | 0.42     | 0.96     | 0.16     | NA | NA | NA | NA |
| 0.09  | 0.05  | 0     | 0.03  | 0.24 | 0.33     | 0.98     | 0.17     | NA | NA | NA | NA |
| 0.06  | 0.15  | -0.02 | 0.05  | 0.25 | 0.0018   | 0.29     | 0.01     | NA | NA | NA | NA |
| 0.11  | 0.05  | -0.03 | -0.03 | 0.26 | 0.39     | 0.6      | 0.53     | NA | NA | NA | NA |
| 0.1   | -0.02 | -0.04 | -0.01 | 0.26 | 0.85     | 0.011    | 0.47     | NA | NA | NA | NA |
| 0.06  | 0.26  | -0.13 | 0.02  | 0.26 | 6.30E-06 | 4.10E-08 | 0.65     | NA | NA | NA | NA |
| 0.08  | 0.08  | -0.05 | -0.08 | 0.27 | 0.28     | 0.12     | 0.013    | NA | NA | NA | NA |
| 0.12  | -0.12 | -0.06 | -0.03 | 0.28 | 0.059    | 0.044    | 0.48     | NA | NA | NA | NA |
| 0.08  | 0     | -0.01 | 0.09  | 0.3  | 1        | 0.8      | 1.50E-05 | NA | NA | NA | NA |
| 0.09  | 0.02  | -0.1  | -0.04 | 0.33 | 0.88     | 2.40E-06 | 0.13     | NA | NA | NA | NA |
| 0.1   | 0.06  | -0.08 | -0.07 | 0.33 | 0.17     | 0.027    | 0.074    | NA | NA | NA | NA |
| -0.02 | -0.01 | -0.08 | -0.02 | 0.34 | 0.81     | 7.60E-05 | 0.46     | NA | NA | NA | NA |
| 0.03  | 0.02  | -0.01 | 0.02  | 0.35 | 0.28     | 0.17     | 0.065    | NA | NA | NA | NA |
| -0.03 | -0.03 | -0.02 | 0     | 0.35 | 0.19     | 0.12     | 0.87     | NA | NA | NA | NA |
| 0.02  | -0.01 | -0.03 | 0     | 0.36 | 1        | 0.063    | 0.91     | NA | NA | NA | NA |
| 0.04  | -0.01 | -0.02 | -0.05 | 0.36 | 0.62     | 0.25     | 0.001    | NA | NA | NA | NA |
| 0.08  | 0.15  | -0.08 | 0.02  | 0.36 | 0.054    | 0.00016  | 0.6      | NA | NA | NA | NA |
| 0.06  | 0.14  | 0     | 0.03  | 0.36 | 0.045    | 1        | 0.27     | NA | NA | NA | NA |
| 0.09  | 0.36  | -0.08 | 0.03  | 0.36 | 0.0043   | 0.00091  | 0.32     | NA | NA | NA | NA |
| -0.05 | 0     | 0.02  | 0.05  | 0.37 | 1        | 0.66     | 0.033    | NA | NA | NA | NA |
| 0.18  | 0.05  | 0.03  | 0.09  | 0.38 | 0.72     | 0.59     | 0.16     | NA | NA | NA | NA |
| 0.06  | -0.02 | -0.07 | -0.05 | 0.38 | 0.75     | 0.00086  | 0.019    | NA | NA | NA | NA |
| 0.03  | -0.05 | -0.03 | 0.01  | 0.38 | 0.0091   | 0.093    | 0.5      | NA | NA | NA | NA |
| -0.03 | -0.05 | 0.01  | -0.01 | 0.4  | 0.044    | 0.8      | 0.52     | NA | NA | NA | NA |
| -0.02 | 0.06  | 0.01  | 0.03  | 0.41 | 0.049    | 0.57     | 0.059    | NA | NA | NA | NA |
| 0.07  | 0     | 0.06  | 0     | 0.42 | 1        | 0.34     | 1        | NA | NA | NA | NA |
| 0.22  | 0.08  | -0.08 | 0     | 0.42 | 0.64     | 0.17     | 1        | NA | NA | NA | NA |

|       |       |       |       |      |          |          |          |    |    |    |    |
|-------|-------|-------|-------|------|----------|----------|----------|----|----|----|----|
| -0.1  | -0.1  | -0.05 | -0.05 | 0.42 | 0.062    | 0.052    | 0.067    | NA | NA | NA | NA |
| 0.11  | 0.07  | 0.08  | 0.17  | 0.42 | 0.37     | 0.023    | 2.50E-06 | NA | NA | NA | NA |
| -0.1  | -0.01 | -0.07 | -0.01 | 0.43 | 1        | 0.018    | 0.89     | NA | NA | NA | NA |
| -0.08 | 0.19  | -0.08 | 0.02  | 0.43 | 0.066    | 0.00011  | 0.54     | NA | NA | NA | NA |
| -0.06 | 0.15  | 0.04  | 0.07  | 0.43 | 0.53     | 0.22     | 0.1      | NA | NA | NA | NA |
| -0.06 | -0.18 | 0.03  | 0.03  | 0.43 | 6.00E-04 | 0.25     | 0.23     | NA | NA | NA | NA |
| 0.15  | 0.14  | -0.04 | -0.02 | 0.43 | 3.00E-04 | 0.16     | 0.53     | NA | NA | NA | NA |
| 0.89  | 0.58  | -0.24 | -0.07 | 0.43 | 0.0097   | 0.002    | 0.53     | NA | NA | NA | NA |
| -0.13 | -0.05 | -0.1  | 0.1   | 0.44 | 1        | 0.038    | 0.17     | NA | NA | NA | NA |
| 0.25  | -0.13 | -0.07 | -0.13 | 0.45 | 0.66     | 0.43     | 0.14     | NA | NA | NA | NA |
| 0.03  | 0.04  | -0.01 | 0.06  | 0.45 | 0.25     | 0.54     | 0.0052   | NA | NA | NA | NA |
| 0.01  | 0.02  | -0.04 | 0.01  | 0.46 | 0.25     | 0.00062  | 0.72     | NA | NA | NA | NA |
| 0.05  | 0.1   | -0.02 | 0     | 0.46 | 0.021    | 0.5      | 0.93     | NA | NA | NA | NA |
| -0.05 | -0.08 | 0     | 0.02  | 0.47 | 0.14     | 1        | 0.42     | NA | NA | NA | NA |
| -0.02 | 0.03  | 0     | 0     | 0.47 | 0.15     | 1        | 0.91     | NA | NA | NA | NA |
| -0.08 | 0.05  | -0.03 | -0.04 | 0.47 | 0.21     | 0.34     | 0.05     | NA | NA | NA | NA |
| 0.02  | 0.07  | -0.03 | 0     | 0.48 | 0.00048  | 0.031    | 0.95     | NA | NA | NA | NA |
| 0.06  | 0.02  | -0.06 | 0.05  | 0.48 | 0.89     | 0.0062   | 0.037    | NA | NA | NA | NA |
| 0.02  | 0.03  | -0.08 | -0.03 | 0.49 | 0.71     | 6.40E-05 | 0.1      | NA | NA | NA | NA |
| 0.79  | -0.03 | -0.13 | -0.1  | 0.49 | 0.64     | 2.40E-07 | 0.00041  | NA | NA | NA | NA |
| 0.06  | -0.06 | -0.09 | -0.09 | 0.49 | 0.46     | 0.00042  | 0.00096  | NA | NA | NA | NA |
| 0.04  | 0.24  | -0.08 | -0.06 | 0.5  | 7.90E-06 | 0.081    | 0.29     | NA | NA | NA | NA |
| 0.09  | 0     | 0.01  | 0.1   | 0.5  | 1        | 0.78     | 4.70E-05 | NA | NA | NA | NA |
| -0.04 | -0.07 | -0.07 | 0     | 0.51 | 0.12     | 5.40E-05 | 0.91     | NA | NA | NA | NA |
| -0.08 | 0.16  | -0.03 | 0.09  | 0.51 | 0.089    | 0.2      | 0.085    | NA | NA | NA | NA |
| 0.03  | -0.02 | 0     | 0.06  | 0.51 | 0.5      | 0.9      | 0.0059   | NA | NA | NA | NA |
| -0.01 | 0.01  | -0.03 | 0.06  | 0.52 | 0.91     | 0.075    | 7.80E-05 | NA | NA | NA | NA |
| -0.04 | -0.06 | -0.09 | -0.02 | 0.53 | 0.1      | 2.60E-06 | 0.52     | NA | NA | NA | NA |
| 0.07  | 0.22  | 0     | 0     | 0.53 | 0.00013  | 0.92     | 1        | NA | NA | NA | NA |
| 0.04  | 0.1   | -0.01 | 0.05  | 0.54 | 0.064    | 0.61     | 0.0091   | NA | NA | NA | NA |

|       |       |       |       |      |          |          |          |    |    |    |    |
|-------|-------|-------|-------|------|----------|----------|----------|----|----|----|----|
| 0.06  | 0.04  | -0.07 | -0.06 | 0.54 | 0.69     | 0.022    | 0.038    | NA | NA | NA | NA |
| 0.39  | 0.14  | -0.06 | 0     | 0.54 | 0.16     | 0.05     | 1        | NA | NA | NA | NA |
| -0.02 | 0.06  | -0.01 | 0.02  | 0.55 | 0.0061   | 0.34     | 0.086    | NA | NA | NA | NA |
| -0.04 | 0.17  | -0.06 | -0.01 | 0.55 | 0.0059   | 0.00053  | 0.62     | NA | NA | NA | NA |
| -0.03 | 0.08  | 0.1   | 0.03  | 0.55 | 0.084    | 0.00013  | 0.29     | NA | NA | NA | NA |
| 0.06  | 0.11  | -0.06 | 0.02  | 0.56 | 0.27     | 0.0035   | 0.36     | NA | NA | NA | NA |
| -0.19 | 0.01  | -0.01 | 0.04  | 0.56 | 1        | 1        | 0.59     | NA | NA | NA | NA |
| -0.1  | -0.18 | -0.08 | -0.1  | 0.57 | 0.013    | 0.016    | 3.00E-04 | NA | NA | NA | NA |
| 0.04  | 0.26  | -0.1  | -0.09 | 0.57 | 0.029    | 0.015    | 0.036    | NA | NA | NA | NA |
| -0.03 | 0.42  | -0.07 | 0.01  | 0.58 | 6.10E-09 | 0.084    | 0.89     | NA | NA | NA | NA |
| -0.02 | 0.03  | -0.02 | 0.09  | 0.6  | 0.36     | 0.31     | 2.20E-05 | NA | NA | NA | NA |
| 0.03  | -0.04 | -0.05 | -0.04 | 0.6  | 0.39     | 0.073    | 0.098    | NA | NA | NA | NA |
| 0.04  | 0.06  | -0.1  | -0.03 | 0.6  | 0.39     | 8.60E-05 | 0.25     | NA | NA | NA | NA |
| 0.11  | 0.06  | -0.11 | -0.03 | 0.6  | 0.023    | 9.10E-08 | 0.25     | NA | NA | NA | NA |
| -0.02 | 0.01  | -0.04 | 0.01  | 0.6  | 0.8      | 0.0069   | 0.33     | NA | NA | NA | NA |
| 0.02  | 0.04  | 0.04  | 0.06  | 0.6  | 0.22     | 0.047    | 0.0013   | NA | NA | NA | NA |
| 0.05  | 0.15  | -0.03 | -0.04 | 0.61 | 0.026    | 0.22     | 0.078    | NA | NA | NA | NA |
| -0.83 | -0.75 | -0.05 | -0.05 | 0.61 | 0.82     | 0.36     | 0.5      | NA | NA | NA | NA |
| -0.04 | 0.5   | -0.07 | -0.04 | 0.62 | 2.00E-04 | 0.024    | 0.19     | NA | NA | NA | NA |
| 0.73  | 0.37  | 0     | 0.16  | 0.62 | 0.011    | 1        | 0.02     | NA | NA | NA | NA |
| 0.07  | 0.13  | -0.09 | -0.06 | 0.62 | 0.0026   | 3.80E-05 | 0.0075   | NA | NA | NA | NA |
| 0.02  | 0.08  | 0.01  | -0.01 | 0.63 | 0.012    | 0.56     | 0.48     | NA | NA | NA | NA |
| 0.02  | 0.12  | -0.03 | 0.01  | 0.63 | 1.40E-06 | 0.14     | 0.82     | NA | NA | NA | NA |
| 0.04  | 0.06  | -0.04 | -0.05 | 0.64 | 0.17     | 0.033    | 0.017    | NA | NA | NA | NA |
| 0.03  | -0.01 | -0.04 | 0.06  | 0.64 | 1        | 0.099    | 0.066    | NA | NA | NA | NA |
| -0.04 | 0.01  | -0.01 | 0.02  | 0.65 | 0.93     | 0.6      | 0.42     | NA | NA | NA | NA |
| 0.05  | -0.02 | -0.08 | -0.04 | 0.65 | 0.62     | 2.80E-06 | 0.035    | NA | NA | NA | NA |
| 0.02  | 0.02  | -0.08 | 0.07  | 0.68 | 0.51     | 0.00049  | 0.02     | NA | NA | NA | NA |
| 0.71  | 0.06  | -0.2  | 0.04  | 0.69 | 0.84     | 0.084    | 1        | NA | NA | NA | NA |
| 0.02  | 0.11  | 0     | 0.09  | 0.69 | 0.00053  | 0.9      | 3.10E-07 | NA | NA | NA | NA |

|       |       |       |       |      |          |          |          |    |    |    |    |
|-------|-------|-------|-------|------|----------|----------|----------|----|----|----|----|
| 0.03  | 0.02  | 0     | 0.19  | 0.69 | 0.86     | 0.96     | 1.70E-08 | NA | NA | NA | NA |
| 0.02  | 0.02  | -0.07 | -0.04 | 0.7  | 0.49     | 0.00014  | 0.053    | NA | NA | NA | NA |
| 0.05  | -0.03 | -0.04 | -0.01 | 0.7  | 0.86     | 0.11     | 0.87     | NA | NA | NA | NA |
| 0.69  | -0.18 | -0.03 | -0.02 | 0.71 | 0.2      | 0.62     | 0.62     | NA | NA | NA | NA |
| 0.01  | 0.05  | -0.03 | -0.01 | 0.71 | 0.13     | 0.11     | 0.87     | NA | NA | NA | NA |
| 0.13  | -0.05 | -0.04 | 0.02  | 0.71 | 0.79     | 0.07     | 0.43     | NA | NA | NA | NA |
| 0.06  | 0.04  | -0.02 | 0.03  | 0.72 | 0.16     | 0.41     | 0.16     | NA | NA | NA | NA |
| -0.12 | -0.19 | -0.07 | 0     | 0.73 | 0.039    | 0.0047   | 0.95     | NA | NA | NA | NA |
| 0.06  | -0.06 | 0.01  | 0.13  | 0.73 | 0.06     | 0.84     | 8.20E-05 | NA | NA | NA | NA |
| -0.01 | 0.21  | -0.02 | 0.06  | 0.73 | 4.20E-06 | 0.45     | 0.018    | NA | NA | NA | NA |
| 0.01  | 0.03  | -0.01 | 0     | 0.74 | 0.37     | 0.72     | 0.96     | NA | NA | NA | NA |
| 0.05  | 0.02  | -0.11 | -0.07 | 0.74 | 0.88     | 3.20E-05 | 0.017    | NA | NA | NA | NA |
| 0.05  | 0.01  | 0.02  | 0.07  | 0.74 | 0.71     | 0.45     | 0.0053   | NA | NA | NA | NA |
| -0.24 | NA    | 0.05  | 0.13  | 0.74 | NA       | 0.45     | 0.0085   | NA | NA | NA | NA |
| 0.02  | 0.11  | -0.03 | 0.04  | 0.75 | 0.0065   | 0.17     | 0.048    | NA | NA | NA | NA |
| -0.01 | 0.02  | 0.01  | 0.06  | 0.76 | 0.66     | 0.46     | 0.0015   | NA | NA | NA | NA |
| -0.01 | 0.07  | 0.01  | 0.03  | 0.77 | 0.056    | 0.74     | 0.077    | NA | NA | NA | NA |
| 0.67  | -0.25 | -0.08 | 0.04  | 0.77 | 0.099    | 0.12     | 0.65     | NA | NA | NA | NA |
| 0.01  | 0.01  | -0.01 | 0.03  | 0.77 | 0.84     | 0.2      | 0.0071   | NA | NA | NA | NA |
| -0.02 | -0.07 | -0.01 | 0     | 0.78 | 0.07     | 0.61     | 1        | NA | NA | NA | NA |
| -0.03 | -0.04 | -0.03 | 0.04  | 0.79 | 0.57     | 0.088    | 0.05     | NA | NA | NA | NA |
| 0.05  | 0.13  | -0.01 | 0.08  | 0.79 | 0.0094   | 0.85     | 0.003    | NA | NA | NA | NA |
| 0.02  | -0.02 | 0.01  | 0.06  | 0.79 | 0.38     | 0.86     | 0.12     | NA | NA | NA | NA |
| 0.01  | -0.03 | -0.04 | 0     | 0.8  | 0.38     | 3.00E-04 | 0.94     | NA | NA | NA | NA |
| -0.02 | 0.22  | -0.06 | 0.02  | 0.81 | 0.081    | 0.0041   | 0.47     | NA | NA | NA | NA |
| 0.01  | 0.1   | 0     | 0.11  | 0.81 | 0.037    | 1        | 0.0033   | NA | NA | NA | NA |
| -0.5  | -0.36 | 0     | 0.05  | 0.82 | 0.61     | 1        | 0.46     | NA | NA | NA | NA |
| 0.02  | -0.02 | 0.02  | 0.02  | 0.83 | 0.38     | 0.38     | 0.23     | NA | NA | NA | NA |
| 0.01  | 0.05  | 0.01  | 0.01  | 0.83 | 0.011    | 0.57     | 0.31     | NA | NA | NA | NA |
| 0.08  | -0.27 | -0.08 | -0.12 | 0.83 | 0.0017   | 0.028    | 0.00021  | NA | NA | NA | NA |

|       |       |       |       |      |          |          |          |    |    |    |    |
|-------|-------|-------|-------|------|----------|----------|----------|----|----|----|----|
| 0     | 0.04  | -0.04 | 0     | 0.83 | 0.0042   | 7.50E-05 | 0.75     | NA | NA | NA | NA |
| 0.01  | -0.02 | -0.01 | 0.03  | 0.83 | 0.18     | 0.57     | 0.24     | NA | NA | NA | NA |
| -0.01 | -0.01 | -0.08 | -0.02 | 0.87 | 0.74     | 6.40E-06 | 0.29     | NA | NA | NA | NA |
| 0.02  | 0.1   | -0.02 | -0.09 | 0.88 | 0.054    | 0.57     | 5.90E-05 | NA | NA | NA | NA |
| -0.01 | 0.05  | -0.03 | 0.03  | 0.89 | 0.22     | 0.092    | 0.078    | NA | NA | NA | NA |
| -0.01 | 0.02  | -0.02 | 0.06  | 0.89 | 0.59     | 0.18     | 0.0035   | NA | NA | NA | NA |
| 0.01  | 0.03  | -0.04 | -0.07 | 0.9  | 0.68     | 0.17     | 0.013    | NA | NA | NA | NA |
| 0.03  | -0.26 | -0.04 | 0.09  | 0.9  | 2.70E-07 | 0.03     | 0.0011   | NA | NA | NA | NA |
| -0.01 | 0.05  | -0.05 | -0.02 | 0.91 | 0.14     | 0.00077  | 0.12     | NA | NA | NA | NA |
| 0.2   | 0.12  | 0.01  | -0.02 | 0.92 | 0.26     | 0.91     | 0.58     | NA | NA | NA | NA |
| -0.01 | -0.1  | -0.03 | 0     | 0.93 | 0.0052   | 0.1      | 0.92     | NA | NA | NA | NA |
| -0.01 | 0.08  | -0.01 | 0.01  | 0.93 | 0.058    | 0.35     | 0.42     | NA | NA | NA | NA |
| 0.04  | -0.31 | 0.01  | 0.11  | 0.93 | 0.014    | 0.75     | 0.0062   | NA | NA | NA | NA |
| -0.01 | -0.02 | -0.02 | -0.04 | 0.93 | 0.86     | 0.39     | 0.057    | NA | NA | NA | NA |
| -0.02 | 0.05  | -0.04 | 0.03  | 0.93 | 0.24     | 0.081    | 0.45     | NA | NA | NA | NA |
| 0.01  | 0.12  | -0.04 | 0     | 0.93 | 0.0022   | 0.026    | 1        | NA | NA | NA | NA |
| 0.03  | 0.59  | 0.08  | 0.02  | 0.95 | 0.00015  | 0.002    | 0.71     | NA | NA | NA | NA |
| -0.01 | 0.04  | -0.08 | -0.06 | 0.97 | 0.8      | 0.00079  | 0.019    | NA | NA | NA | NA |
| 0     | -0.01 | -0.01 | 0.05  | 0.97 | 0.67     | 0.42     | 0.042    | NA | NA | NA | NA |
| -0.03 | -0.05 | -0.03 | -0.02 | 0.98 | 0.86     | 0.37     | 0.47     | NA | NA | NA | NA |
| 0     | -0.02 | -0.02 | 0.02  | 0.99 | 0.27     | 0.36     | 0.3      | NA | NA | NA | NA |
| 0     | 0.04  | 0.03  | -0.01 | 0.99 | 0.38     | 0.39     | 0.73     | NA | NA | NA | NA |
| 0.03  | -0.04 | 0.04  | 0.08  | 1    | 0.98     | 0.32     | 0.01     | NA | NA | NA | NA |
| 0.05  | 0.22  | 0.14  | 0.11  | 1    | 0.27     | 0.55     | 0.03     | NA | NA | NA | NA |
| 0     | 0.01  | -0.04 | 0.05  | 1    | 0.56     | 0.0013   | 0.00034  | NA | NA | NA | NA |
| -0.03 | -0.04 | -0.06 | 0.04  | 1    | 0.89     | 0.031    | 0.25     | NA | NA | NA | NA |
| -0.01 | 0.01  | -0.15 | -0.14 | 1    | 1        | 8.40E-05 | 0.00013  | NA | NA | NA | NA |
| 0.01  | 0.14  | -0.06 | 0.05  | 1    | 0.046    | 0.041    | 0.21     | NA | NA | NA | NA |
| -0.01 | -0.07 | -0.08 | -0.03 | 1    | 0.23     | 0.0082   | 0.3      | NA | NA | NA | NA |
| 0.11  | 0.11  | -0.02 | 0.04  | 1    | 0.52     | 0.63     | 0.36     | NA | NA | NA | NA |

|       |       |       |       |   |          |          |          |    |    |    |    |
|-------|-------|-------|-------|---|----------|----------|----------|----|----|----|----|
| 0.02  | 0.09  | -0.05 | 0     | 1 | 0.35     | 0.076    | 0.97     | NA | NA | NA | NA |
| 0     | 0.17  | 0.02  | 0.01  | 1 | 0.0043   | 0.68     | 0.92     | NA | NA | NA | NA |
| 0.02  | 0.1   | -0.02 | 0.08  | 1 | 0.074    | 0.41     | 0.001    | NA | NA | NA | NA |
| 0.01  | 0.04  | -0.04 | 0.03  | 1 | 1        | 0.052    | 0.29     | NA | NA | NA | NA |
| 0     | 0     | -0.05 | 0.11  | 1 | 1        | 0.0019   | 4.60E-07 | NA | NA | NA | NA |
| 0.02  | -0.01 | -0.05 | 0.05  | 1 | 0.77     | 0.0014   | 0.046    | NA | NA | NA | NA |
| -0.02 | 0.03  | -0.03 | 0.09  | 1 | 0.41     | 0.51     | 0.017    | NA | NA | NA | NA |
| 0.07  | NA    | -0.04 | 0.02  | 1 | NA       | 0.26     | 0.42     | NA | NA | NA | NA |
| 0.08  | 0.02  | -0.14 | -0.06 | 1 | 0.8      | 1.10E-05 | 0.093    | NA | NA | NA | NA |
| 0     | 0.04  | -0.02 | -0.03 | 1 | 0.42     | 0.85     | 0.61     | NA | NA | NA | NA |
| 0.01  | 0.1   | -0.03 | 0     | 1 | 0.081    | 0.16     | 0.92     | NA | NA | NA | NA |
| -0.02 | 0.06  | -0.12 | 0.06  | 1 | 1        | 7.60E-05 | 0.23     | NA | NA | NA | NA |
| 0     | NA    | 0     | 0.06  | 1 | NA       | 1        | 0.18     | NA | NA | NA | NA |
| -0.01 | 0.02  | -0.02 | -0.02 | 1 | 0.58     | 0.25     | 0.3      | NA | NA | NA | NA |
| -0.1  | 0.11  | -0.12 | -0.11 | 1 | 1        | 0.072    | 0.084    | NA | NA | NA | NA |
| -0.01 | 0.02  | -0.05 | 0.01  | 1 | 0.68     | 0.16     | 0.98     | NA | NA | NA | NA |
| 0     | 0.15  | -0.15 | -0.04 | 1 | 0.013    | 2.80E-06 | 0.35     | NA | NA | NA | NA |
| 0.05  | 0.06  | -0.01 | -0.06 | 1 | 1        | 1        | 0.25     | NA | NA | NA | NA |
| 0.01  | 0.12  | -0.06 | 0     | 1 | 0.015    | 0.0099   | 1        | NA | NA | NA | NA |
| 0     | -0.05 | -0.01 | 0.1   | 1 | 0.35     | 0.85     | 0.006    | NA | NA | NA | NA |
| 0     | 0.17  | -0.01 | -0.01 | 1 | 3.80E-05 | 0.67     | 0.57     | NA | NA | NA | NA |
| -0.01 | 0.03  | 0.02  | 0.08  | 1 | 0.76     | 0.69     | 0.047    | NA | NA | NA | NA |
| -0.01 | -0.03 | -0.1  | -0.02 | 1 | 0.89     | 0.013    | 0.91     | NA | NA | NA | NA |
| -0.02 | 0.08  | -0.05 | 0     | 1 | 0.28     | 0.026    | 1        | NA | NA | NA | NA |
| 0.01  | 0.02  | -0.06 | 0.01  | 1 | 0.8      | 0.021    | 0.79     | NA | NA | NA | NA |
| -0.01 | 0.04  | -0.11 | -0.12 | 1 | 0.7      | 1.70E-05 | 3.30E-05 | NA | NA | NA | NA |
| 0.07  | 0.56  | 0.06  | -0.02 | 1 | 0.005    | 0.5      | 0.85     | NA | NA | NA | NA |
| 0     | 0.09  | -0.05 | 0.02  | 1 | 0.17     | 0.55     | 0.96     | NA | NA | NA | NA |
| 0.03  | 0.13  | -0.03 | 0.03  | 1 | 0.016    | 0.25     | 0.59     | NA | NA | NA | NA |
| -0.02 | 0.04  | 0     | 0.03  | 1 | 0.56     | 0.91     | 0.15     | NA | NA | NA | NA |





|       |       |       |       |          |          |          |       |    |    |    |    |
|-------|-------|-------|-------|----------|----------|----------|-------|----|----|----|----|
| NA    | NA    | 0.08  | 0.21  | NA       | NA       | 1        | 0.34  | NA | NA | NA | NA |
| NA    | 0.03  | -0.12 | 0.01  | NA       | 1        | 0.0035   | 0.96  | NA | NA | NA | NA |
| NA    | 0.05  | 0.09  | 0.02  | NA       | 0.9      | 0.016    | 0.46  | NA | NA | NA | NA |
| NA    | NA    | 0.07  | 0.01  | NA       | NA       | 0.17     | 1     | NA | NA | NA | NA |
| NA    | -0.92 | -0.06 | -0.09 | NA       | 0.16     | 0.18     | 0.04  | NA | NA | NA | NA |
| NA    | -0.07 | -0.04 | 0.07  | NA       | 0.91     | 0.63     | 0.26  | NA | NA | NA | NA |
| NA    | 0.01  | -0.04 | 0.01  | NA       | 1        | 0.45     | 0.99  | NA | NA | NA | NA |
| NA    | 0.55  | 0.5   | 0.5   | NA       | 1        | 0.28     | 1     | NA | NA | NA | NA |
| NA    | NA    | -0.03 | 0.09  | NA       | NA       | 0.75     | 0.56  | NA | NA | NA | NA |
| NA    | 0.11  | 0.05  | 0.14  | NA       | 0.84     | 0.56     | 0.13  | NA | NA | NA | NA |
| NA    | 0.02  | -0.02 | 0.01  | NA       | 0.34     | 0.69     | 0.96  | NA | NA | NA | NA |
| NA    | NA    | -0.04 | 0.04  | NA       | NA       | 0.28     | 0.4   | NA | NA | NA | NA |
| NA    | NA    | NA    | NA    | NA       | NA       | NA       | NA    | NA | NA | NA | NA |
| NA    | NA    | NA    | NA    | NA       | NA       | NA       | NA    | NA | NA | NA | NA |
| NA    | NA    | 0.07  | NA    | NA       | NA       | 0.97     | NA    | NA | NA | NA | NA |
| NA    | 0.01  | 0.03  | -0.05 | NA       | 0.9      | 0.47     | 0.13  | NA | NA | NA | NA |
| 0.29  | 0.03  | -0.07 | -0.07 | 1.10E-08 | 0.4      | 0.021    | 0.025 | NA | NA | NA | NA |
| 0.54  | 0.18  | -0.06 | -0.04 | 1.40E-08 | 0.0088   | 0.047    | 0.19  | NA | NA | NA | NA |
| 0.31  | 0.07  | -0.1  | -0.05 | 4.80E-08 | 0.42     | 0.22     | 0.61  | NA | NA | NA | NA |
| 0.2   | 0.02  | -0.01 | 0.01  | 8.50E-08 | 0.56     | 0.65     | 0.67  | NA | NA | NA | NA |
| 0.21  | 0.09  | -0.03 | 0.02  | 1.80E-07 | 0.00078  | 0.089    | 0.37  | NA | NA | NA | NA |
| 0.17  | 0.06  | -0.04 | -0.03 | 3.10E-07 | 0.021    | 0.0098   | 0.019 | NA | NA | NA | NA |
| 0.16  | 0.04  | -0.07 | -0.01 | 3.40E-07 | 0.15     | 3.20E-07 | 0.47  | NA | NA | NA | NA |
| -0.22 | -0.06 | -0.03 | 0.01  | 5.10E-07 | 0.065    | 0.27     | 0.83  | NA | NA | NA | NA |
| 0.14  | 0.04  | -0.01 | 0.02  | 6.60E-07 | 0.039    | 0.65     | 0.078 | NA | NA | NA | NA |
| 0.07  | 0.08  | 0     | 0.02  | 1.20E-06 | 1.30E-09 | 0.71     | 0.072 | NA | NA | NA | NA |
| 0.09  | 0.03  | -0.02 | 0.02  | 1.20E-06 | 0.051    | 0.12     | 0.33  | NA | NA | NA | NA |
| 0.11  | 0     | 0     | 0.03  | 1.40E-06 | 0.93     | 0.94     | 0.039 | NA | NA | NA | NA |
| -0.39 | -0.41 | -0.18 | -0.1  | 2.40E-06 | 1.10E-08 | 0.0018   | 0.068 | NA | NA | NA | NA |
| -0.15 | -0.03 | 0.02  | 0.02  | 2.90E-06 | 0.64     | 0.4      | 0.17  | NA | NA | NA | NA |

|       |       |       |       |          |          |          |          |    |    |    |    |
|-------|-------|-------|-------|----------|----------|----------|----------|----|----|----|----|
| 0.28  | 0.02  | 0     | 0.01  | 4.10E-06 | 0.71     | 0.9      | 0.8      | NA | NA | NA | NA |
| 0.11  | 0.08  | -0.03 | -0.01 | 5.60E-06 | 0.00013  | 0.0037   | 0.56     | NA | NA | NA | NA |
| 0.24  | 0.22  | -0.01 | 0.03  | 6.10E-06 | 1.10E-06 | 0.52     | 0.13     | NA | NA | NA | NA |
| 0.94  | NA    | 0     | NA    | 7.80E-06 | NA       | 1        | NA       | NA | NA | NA | NA |
| 0.37  | 0.08  | -0.03 | 0.07  | 8.50E-06 | 0.083    | 0.05     | 7.40E-05 | NA | NA | NA | NA |
| 0.11  | 0.06  | -0.04 | 0.01  | 1.20E-05 | 0.011    | 0.0041   | 0.38     | NA | NA | NA | NA |
| 0.26  | 0.17  | -0.08 | 0.02  | 1.70E-05 | 0.00012  | 0.00068  | 0.67     | NA | NA | NA | NA |
| -0.42 | -0.31 | -0.04 | 0.22  | 1.80E-05 | 0.0053   | 0.47     | 0.00069  | NA | NA | NA | NA |
| 0.05  | 0     | 0     | 0.03  | 1.80E-05 | 0.95     | 0.87     | 0.038    | NA | NA | NA | NA |
| 0.18  | 0.01  | -0.03 | 0.01  | 2.00E-05 | 0.68     | 0.25     | 0.78     | NA | NA | NA | NA |
| 0.6   | 0     | -0.07 | 0.1   | 2.10E-05 | 1        | 0.0071   | 0.067    | NA | NA | NA | NA |
| 0.05  | 0     | -0.07 | -0.03 | 2.30E-05 | 0.8      | 9.70E-06 | 0.19     | NA | NA | NA | NA |
| 0.19  | 0.17  | -0.02 | 0.04  | 2.60E-05 | 1.10E-07 | 0.18     | 0.041    | NA | NA | NA | NA |
| -0.21 | -0.22 | -0.02 | 0.03  | 2.80E-05 | 3.60E-07 | 0.27     | 0.075    | NA | NA | NA | NA |
| 0.96  | NA    | 0.05  | 0     | 3.20E-05 | NA       | 0.19     | 1        | NA | NA | NA | NA |
| -0.5  | NA    | -0.04 | -0.02 | 3.60E-05 | NA       | 1.10E-05 | 0.06     | NA | NA | NA | NA |
| 0.39  | 0.13  | -0.03 | 0.02  | 5.70E-05 | 0.04     | 0.05     | 0.26     | NA | NA | NA | NA |
| 0.15  | -0.06 | -0.03 | 0.02  | 7.10E-05 | 0.034    | 0.22     | 0.46     | NA | NA | NA | NA |
| -0.12 | -0.16 | -0.04 | -0.02 | 0.00013  | 2.50E-06 | 0.0072   | 0.17     | NA | NA | NA | NA |
| 0.28  | 0.03  | -0.04 | 0.01  | 0.00014  | 0.44     | 0.032    | 0.7      | NA | NA | NA | NA |
| 0.21  | 0.01  | -0.04 | 0.04  | 2.00E-04 | 0.92     | 0.056    | 0.07     | NA | NA | NA | NA |
| 0.25  | 0.07  | 0.04  | 0.07  | 2.00E-04 | 0.19     | 0.56     | 0.15     | NA | NA | NA | NA |
| 0.22  | -0.04 | -0.08 | -0.05 | 0.00022  | 0.33     | 8.80E-05 | 0.022    | NA | NA | NA | NA |
| 0.19  | 0.08  | -0.04 | -0.04 | 0.00027  | 0.078    | 0.027    | 0.052    | NA | NA | NA | NA |
| 0.29  | 0.16  | -0.05 | 0.09  | 0.00034  | 0.0019   | 0.07     | 0.0056   | NA | NA | NA | NA |
| 0.66  | 0.05  | -0.02 | 0.12  | 0.00038  | 1        | 0.59     | 0.012    | NA | NA | NA | NA |
| 0.29  | 0.14  | -0.02 | 0.13  | 0.00049  | 0.055    | 0.57     | 0.0096   | NA | NA | NA | NA |
| 0.63  | 0.28  | -0.06 | -0.04 | 0.00054  | 0.18     | 0.18     | 0.54     | NA | NA | NA | NA |
| 0.11  | 0.1   | -0.08 | 0.05  | 0.00055  | 0.017    | 3.20E-06 | 0.078    | NA | NA | NA | NA |
| 0.61  | 0.68  | 0.08  | 0.15  | 0.00057  | 0.011    | 0.39     | 0.14     | NA | NA | NA | NA |

|       |       |       |       |          |          |          |          |    |    |    |    |
|-------|-------|-------|-------|----------|----------|----------|----------|----|----|----|----|
| 0.1   | 0.03  | -0.01 | 0.01  | 6.00E-04 | 0.2      | 0.64     | 0.52     | NA | NA | NA | NA |
| 0.64  | 0.05  | -0.04 | 0     | 0.00061  | 1        | 0.18     | 1        | NA | NA | NA | NA |
| -0.11 | 0.05  | -0.03 | 0.03  | 0.00066  | 0.21     | 0.0098   | 0.088    | NA | NA | NA | NA |
| -0.24 | -0.12 | -0.07 | 0     | 0.00074  | 0.24     | 0.025    | 0.98     | NA | NA | NA | NA |
| 0.25  | 0.08  | 0.3   | 0.22  | 0.00078  | 0.24     | 4.30E-07 | 0.0063   | NA | NA | NA | NA |
| 0.06  | 0.06  | -0.04 | -0.01 | 0.00079  | 4.20E-06 | 5.80E-09 | 0.33     | NA | NA | NA | NA |
| -0.59 | -0.25 | -0.03 | 0.02  | 8.00E-04 | 0.36     | 0.3      | 0.65     | NA | NA | NA | NA |
| 0.19  | -0.03 | 0     | 0.02  | 0.00082  | 0.19     | 0.87     | 0.4      | NA | NA | NA | NA |
| 0.1   | 0.09  | -0.05 | -0.01 | 0.00086  | 4.50E-05 | 0.00074  | 0.32     | NA | NA | NA | NA |
| 0.27  | 0.12  | -0.02 | 0.04  | 0.00098  | 0.033    | 0.25     | 0.079    | NA | NA | NA | NA |
| 0.54  | 0.05  | -0.02 | 0.01  | 0.001    | 0.37     | 0.58     | 0.86     | NA | NA | NA | NA |
| 0.16  | 0.03  | 0     | 0.07  | 0.0011   | 0.37     | 0.91     | 7.00E-04 | NA | NA | NA | NA |
| 0.13  | 0.02  | -0.05 | -0.01 | 0.0012   | 0.47     | 0.0036   | 0.44     | NA | NA | NA | NA |
| 0.08  | 0.04  | -0.06 | -0.02 | 0.0013   | 0.055    | 4.20E-06 | 0.27     | NA | NA | NA | NA |
| 0.12  | 0     | -0.03 | 0.01  | 0.0014   | 0.95     | 0.32     | 0.76     | NA | NA | NA | NA |
| -0.44 | -0.45 | 0     | 0.04  | 0.0014   | 0.012    | 1        | 0.86     | NA | NA | NA | NA |
| 0.08  | 0.01  | -0.04 | 0.01  | 0.0018   | 0.61     | 0.0097   | 0.42     | NA | NA | NA | NA |
| 0.13  | 0.02  | -0.02 | 0.04  | 0.0019   | 0.55     | 0.23     | 0.0061   | NA | NA | NA | NA |
| 0.12  | 0.1   | 0     | 0     | 0.0022   | 0.0032   | 0.92     | 0.82     | NA | NA | NA | NA |
| 0.27  | 0     | -0.04 | -0.02 | 0.0025   | 1        | 0.16     | 0.42     | NA | NA | NA | NA |
| 0.55  | 0.1   | -0.09 | -0.03 | 0.0025   | 0.49     | 3.60E-05 | 0.27     | NA | NA | NA | NA |
| 0.9   | 0.21  | -0.08 | 0.17  | 0.0028   | 0.39     | 0.063    | 0.0019   | NA | NA | NA | NA |
| 0.2   | 0     | -0.04 | -0.03 | 0.0029   | 1        | 0.13     | 0.19     | NA | NA | NA | NA |
| -0.08 | -0.01 | -0.06 | -0.03 | 0.0033   | 0.59     | 5.90E-08 | 0.047    | NA | NA | NA | NA |
| 0.1   | 0     | -0.01 | 0.02  | 0.0034   | 0.96     | 0.51     | 0.14     | NA | NA | NA | NA |
| 0.13  | 0.06  | -0.01 | 0.03  | 0.0036   | 0.024    | 0.28     | 0.057    | NA | NA | NA | NA |
| 0.08  | 0.09  | -0.06 | -0.03 | 0.004    | 2.20E-05 | 0.0015   | 0.19     | NA | NA | NA | NA |
| 0.07  | 0.05  | -0.05 | -0.02 | 0.004    | 0.00069  | 2.40E-05 | 0.1      | NA | NA | NA | NA |
| 0.58  | 0.03  | -0.28 | -0.02 | 0.0043   | 1        | 4.30E-07 | 0.87     | NA | NA | NA | NA |
| 0.25  | 0.23  | -0.07 | -0.09 | 0.0051   | 0.00022  | 0.094    | 0.047    | NA | NA | NA | NA |

|       |       |       |       |        |          |          |          |    |    |    |    |
|-------|-------|-------|-------|--------|----------|----------|----------|----|----|----|----|
| 0.07  | 0.04  | -0.04 | 0.02  | 0.0053 | 0.017    | 0.0017   | 0.11     | NA | NA | NA | NA |
| 0.08  | 0.01  | -0.03 | -0.01 | 0.0056 | 0.85     | 0.056    | 0.65     | NA | NA | NA | NA |
| 0.25  | 0.24  | -0.1  | -0.09 | 0.0058 | 0.00085  | 0.0023   | 0.0058   | NA | NA | NA | NA |
| 0.1   | -0.03 | -0.03 | -0.01 | 0.0061 | 0.38     | 0.037    | 0.76     | NA | NA | NA | NA |
| 0.21  | 0.02  | -0.1  | -0.04 | 0.0063 | 0.83     | 1.70E-09 | 0.081    | NA | NA | NA | NA |
| 0.08  | 0.08  | 0     | 0.04  | 0.0067 | 0.012    | 1        | 0.02     | NA | NA | NA | NA |
| 0.27  | 0.04  | -0.13 | -0.08 | 0.0067 | 0.46     | 3.90E-05 | 0.052    | NA | NA | NA | NA |
| 0.15  | 0.2   | -0.03 | 0.02  | 0.0077 | 7.60E-08 | 0.035    | 0.15     | NA | NA | NA | NA |
| 0.2   | 0.17  | -0.05 | 0.02  | 0.0087 | 0.0045   | 0.13     | 0.68     | NA | NA | NA | NA |
| 0.2   | 0.21  | 0.02  | 0.04  | 0.0093 | 0.0054   | 0.55     | 0.16     | NA | NA | NA | NA |
| 0.11  | -0.01 | -0.13 | -0.12 | 0.0094 | 0.67     | 2.00E-08 | 6.60E-07 | NA | NA | NA | NA |
| 0.05  | 0.01  | -0.01 | 0     | 0.0094 | 0.68     | 0.41     | 0.91     | NA | NA | NA | NA |
| 0.06  | 0     | -0.02 | 0.02  | 0.01   | 0.87     | 0.05     | 0.059    | NA | NA | NA | NA |
| 0.11  | 0.07  | -0.04 | 0.07  | 0.01   | 0.0012   | 0.0034   | 1.10E-05 | NA | NA | NA | NA |
| 0.08  | 0.1   | -0.01 | -0.01 | 0.011  | 4.10E-05 | 0.72     | 0.45     | NA | NA | NA | NA |
| 0.15  | 0.4   | 0.09  | 0.05  | 0.011  | 1.30E-07 | 0.0083   | 0.11     | NA | NA | NA | NA |
| 0.07  | 0.09  | -0.01 | 0.02  | 0.012  | 6.50E-05 | 0.72     | 0.25     | NA | NA | NA | NA |
| 0.11  | 0.1   | -0.05 | 0.03  | 0.013  | 0.0073   | 0.015    | 0.19     | NA | NA | NA | NA |
| 0.55  | 0.25  | 0     | 0.16  | 0.014  | 0.097    | 1        | 0.017    | NA | NA | NA | NA |
| -0.04 | 0     | -0.03 | -0.01 | 0.015  | 0.89     | 0.089    | 0.73     | NA | NA | NA | NA |
| 0.1   | 0.1   | -0.05 | 0     | 0.016  | 0.00054  | 0.0048   | 0.95     | NA | NA | NA | NA |
| 0.1   | 0.01  | 0.01  | 0.07  | 0.016  | 1        | 0.84     | 0.0086   | NA | NA | NA | NA |
| 0.17  | -0.04 | -0.06 | -0.02 | 0.017  | 0.27     | 0.00036  | 0.23     | NA | NA | NA | NA |
| 0.2   | 0.15  | -0.05 | -0.01 | 0.018  | 0.049    | 0.0051   | 0.73     | NA | NA | NA | NA |
| -0.1  | 0.11  | -0.04 | -0.03 | 0.018  | 0.016    | 0.083    | 0.15     | NA | NA | NA | NA |
| 0.3   | 0.28  | -0.04 | 0.34  | 0.018  | 0.012    | 0.67     | 0.0028   | NA | NA | NA | NA |
| 0.44  | 0.27  | -0.07 | -0.11 | 0.019  | 0.19     | 0.049    | 0.00042  | NA | NA | NA | NA |
| 0.18  | 0.24  | -0.02 | 0.05  | 0.023  | 2.90E-05 | 0.4      | 0.01     | NA | NA | NA | NA |
| 0.22  | 0.05  | -0.04 | -0.01 | 0.023  | 0.4      | 0.15     | 0.67     | NA | NA | NA | NA |
| 0.11  | 0.09  | -0.08 | -0.02 | 0.023  | 0.0022   | 0.00037  | 0.5      | NA | NA | NA | NA |

|       |       |       |       |       |          |          |          |    |    |    |    |
|-------|-------|-------|-------|-------|----------|----------|----------|----|----|----|----|
| 0.07  | 0     | -0.03 | 0.02  | 0.025 | 0.91     | 0.0071   | 0.13     | NA | NA | NA | NA |
| -0.21 | 0.18  | -0.11 | -0.01 | 0.026 | 0.22     | 3.40E-06 | 0.76     | NA | NA | NA | NA |
| 0.18  | 0.07  | -0.06 | -0.07 | 0.028 | 0.28     | 0.0064   | 0.0026   | NA | NA | NA | NA |
| 0.08  | 0.02  | -0.04 | 0.02  | 0.029 | 0.49     | 0.00025  | 0.17     | NA | NA | NA | NA |
| 0.05  | 0.02  | -0.03 | 0.05  | 0.029 | 0.25     | 0.041    | 0.0039   | NA | NA | NA | NA |
| 0.24  | 0.03  | -0.01 | 0.03  | 0.03  | 0.83     | 0.96     | 0.64     | NA | NA | NA | NA |
| 0.06  | 0.03  | -0.06 | -0.03 | 0.031 | 0.18     | 0.00013  | 0.043    | NA | NA | NA | NA |
| 0.07  | 0.1   | -0.03 | 0.02  | 0.031 | 0.00012  | 0.0067   | 0.11     | NA | NA | NA | NA |
| -0.09 | -0.07 | 0.01  | 0.08  | 0.032 | 0.12     | 0.82     | 2.70E-05 | NA | NA | NA | NA |
| 0.06  | 0.08  | -0.06 | -0.01 | 0.033 | 0.0014   | 3.80E-05 | 0.62     | NA | NA | NA | NA |
| 0.05  | -0.01 | -0.05 | 0     | 0.034 | 0.74     | 2.10E-05 | 0.92     | NA | NA | NA | NA |
| 0.05  | 0.09  | -0.04 | -0.02 | 0.037 | 6.90E-06 | 0.0033   | 0.24     | NA | NA | NA | NA |
| 0.12  | 0.06  | -0.05 | -0.01 | 0.04  | 0.063    | 0.03     | 0.63     | NA | NA | NA | NA |
| 0.09  | 0.13  | 0.03  | 0.02  | 0.044 | 7.60E-05 | 0.17     | 0.19     | NA | NA | NA | NA |
| 0.07  | 0.04  | -0.03 | -0.01 | 0.044 | 0.2      | 0.07     | 0.67     | NA | NA | NA | NA |
| 0.11  | 0.01  | -0.05 | 0.06  | 0.047 | 1        | 0.021    | 0.029    | NA | NA | NA | NA |
| 0.1   | 0.04  | -0.02 | 0.04  | 0.049 | 0.23     | 0.25     | 0.022    | NA | NA | NA | NA |
| 0.1   | -0.02 | -0.05 | 0.03  | 0.051 | 0.71     | 0.00049  | 0.14     | NA | NA | NA | NA |
| 0.14  | 0.08  | -0.12 | -0.06 | 0.052 | 0.27     | 1.80E-07 | 0.062    | NA | NA | NA | NA |
| 0.2   | 0.18  | -0.01 | 0.02  | 0.054 | 0.094    | 0.81     | 0.49     | NA | NA | NA | NA |
| 0.07  | 0.07  | 0     | 0.04  | 0.056 | 0.14     | 1        | 0.19     | NA | NA | NA | NA |
| 0.19  | 0.18  | 0.02  | 0.05  | 0.057 | 0.031    | 0.69     | 0.17     | NA | NA | NA | NA |
| 0.22  | 0.34  | 0.03  | 0.01  | 0.063 | 0.0061   | 0.56     | 0.78     | NA | NA | NA | NA |
| -0.03 | -0.02 | -0.04 | -0.03 | 0.063 | 0.38     | 0.0021   | 0.06     | NA | NA | NA | NA |
| 0.11  | 0.02  | -0.05 | -0.04 | 0.064 | 0.53     | 0.0023   | 0.0071   | NA | NA | NA | NA |
| -0.12 | -0.27 | 0.06  | 0.09  | 0.065 | 8.50E-06 | 0.1      | 0.023    | NA | NA | NA | NA |
| -0.08 | -0.01 | -0.04 | 0.02  | 0.066 | 1        | 0.17     | 0.66     | NA | NA | NA | NA |
| 0.08  | -0.01 | -0.03 | 0     | 0.069 | 0.67     | 0.013    | 1        | NA | NA | NA | NA |
| -0.13 | -0.01 | -0.06 | 0.02  | 0.076 | 0.99     | 2.90E-05 | 0.36     | NA | NA | NA | NA |
| 0.08  | 0.07  | -0.05 | -0.05 | 0.076 | 0.5      | 0.015    | 0.025    | NA | NA | NA | NA |

|       |       |       |       |       |          |          |          |    |    |    |    |
|-------|-------|-------|-------|-------|----------|----------|----------|----|----|----|----|
| 0.07  | 0.13  | -0.1  | -0.08 | 0.077 | 8.90E-07 | 2.50E-05 | 0.00096  | NA | NA | NA | NA |
| 0.04  | 0.12  | -0.01 | 0.01  | 0.077 | 6.30E-06 | 0.41     | 0.58     | NA | NA | NA | NA |
| 0.1   | 0.15  | -0.09 | 0.02  | 0.084 | 0.0011   | 2.70E-05 | 0.57     | NA | NA | NA | NA |
| 0.11  | 0.1   | -0.04 | 0.01  | 0.088 | 0.039    | 0.13     | 0.82     | NA | NA | NA | NA |
| 0.06  | 0     | -0.05 | 0.02  | 0.089 | 1        | 0.00023  | 0.16     | NA | NA | NA | NA |
| 0.1   | 0     | -0.01 | 0.05  | 0.09  | 1        | 0.6      | 0.017    | NA | NA | NA | NA |
| 0.08  | 0.05  | -0.02 | 0.07  | 0.091 | 0.13     | 0.46     | 0.0012   | NA | NA | NA | NA |
| 0.03  | 0.03  | -0.08 | -0.04 | 0.091 | 0.12     | 1.00E-09 | 0.009    | NA | NA | NA | NA |
| -0.25 | -0.06 | -0.03 | 0     | 0.092 | 0.6      | 0.29     | 1        | NA | NA | NA | NA |
| 0.13  | 0.08  | 0.02  | 0.03  | 0.092 | 0.13     | 0.53     | 0.23     | NA | NA | NA | NA |
| 0.28  | NA    | 0.01  | 0.09  | 0.096 | NA       | 0.87     | 0.0032   | NA | NA | NA | NA |
| 0.05  | 0.09  | -0.06 | -0.01 | 0.099 | 0.00083  | 5.40E-06 | 0.44     | NA | NA | NA | NA |
| 0.19  | 0.08  | -0.01 | 0.03  | 0.1   | 0.54     | 0.87     | 0.68     | NA | NA | NA | NA |
| 0.13  | 0.03  | -0.04 | 0.04  | 0.1   | 0.33     | 0.085    | 0.13     | NA | NA | NA | NA |
| 0.2   | 0.03  | -0.07 | -0.07 | 0.11  | 0.64     | 0.0068   | 0.0055   | NA | NA | NA | NA |
| 0.28  | 0.39  | -0.04 | 0.05  | 0.11  | 0.001    | 0.034    | 0.013    | NA | NA | NA | NA |
| 0.15  | -0.09 | 0.09  | 0.04  | 0.11  | 0.24     | 0.39     | 0.78     | NA | NA | NA | NA |
| 0.22  | -0.04 | 0     | 0.04  | 0.11  | 0.92     | 1        | 0.15     | NA | NA | NA | NA |
| -0.04 | 0.15  | -0.05 | 0.03  | 0.11  | 0.00024  | 0.0022   | 0.14     | NA | NA | NA | NA |
| 0.06  | -0.02 | -0.06 | -0.02 | 0.11  | 0.48     | 1.30E-07 | 0.18     | NA | NA | NA | NA |
| -0.06 | 0.21  | -0.05 | 0     | 0.11  | 0.00018  | 0.088    | 0.9      | NA | NA | NA | NA |
| 0.15  | 0.06  | 0.02  | -0.01 | 0.11  | 0.51     | 0.61     | 0.9      | NA | NA | NA | NA |
| 0.08  | 0     | -0.05 | -0.03 | 0.11  | 1        | 0.028    | 0.21     | NA | NA | NA | NA |
| 0.23  | 0.1   | -0.07 | -0.09 | 0.12  | 0.057    | 0.14     | 0.04     | NA | NA | NA | NA |
| 0.11  | 0.06  | -0.03 | -0.01 | 0.12  | 0.17     | 0.095    | 0.46     | NA | NA | NA | NA |
| 0.05  | 0.03  | -0.04 | 0.02  | 0.12  | 0.38     | 0.00086  | 0.2      | NA | NA | NA | NA |
| 0.06  | 0     | -0.02 | 0.07  | 0.12  | 0.97     | 0.13     | 0.00019  | NA | NA | NA | NA |
| 0.07  | 0.05  | -0.03 | 0.05  | 0.13  | 0.13     | 0.06     | 0.014    | NA | NA | NA | NA |
| 0.04  | 0.03  | -0.03 | 0.06  | 0.13  | 0.045    | 0.011    | 3.30E-05 | NA | NA | NA | NA |
| 0.05  | 0.01  | -0.11 | -0.04 | 0.13  | 1        | 0.00044  | 0.35     | NA | NA | NA | NA |

|       |       |       |       |      |          |          |          |    |    |    |    |
|-------|-------|-------|-------|------|----------|----------|----------|----|----|----|----|
| 0.93  | 0.13  | 0.07  | 0.03  | 0.13 | 0.46     | 0.34     | 0.94     | NA | NA | NA | NA |
| 0.05  | 0.11  | -0.03 | 0.03  | 0.13 | 1.30E-06 | 0.029    | 0.044    | NA | NA | NA | NA |
| 0.17  | 0.2   | 0.03  | 0.04  | 0.14 | 0.021    | 0.14     | 0.069    | NA | NA | NA | NA |
| 0.08  | -0.05 | -0.06 | 0.02  | 0.14 | 0.034    | 0.00073  | 0.36     | NA | NA | NA | NA |
| 0.1   | 0.16  | -0.03 | 0.04  | 0.14 | 1.40E-05 | 0.1      | 0.062    | NA | NA | NA | NA |
| 0.16  | 0.02  | -0.04 | -0.04 | 0.14 | 1        | 0.35     | 0.43     | NA | NA | NA | NA |
| -0.07 | 0.19  | -0.08 | -0.02 | 0.14 | 0.0014   | 0.00011  | 0.5      | NA | NA | NA | NA |
| -0.09 | -0.07 | 0.05  | 0.1   | 0.14 | 0.34     | 0.15     | 0.00087  | NA | NA | NA | NA |
| 0.07  | 0.14  | -0.05 | 0.03  | 0.14 | 1.40E-06 | 0.00033  | 0.068    | NA | NA | NA | NA |
| 0.1   | -0.08 | 0.04  | 0.11  | 0.15 | 0.045    | 0.21     | 2.00E-04 | NA | NA | NA | NA |
| -0.29 | NA    | 0.02  | 0.01  | 0.15 | NA       | 0.66     | 0.77     | NA | NA | NA | NA |
| 0.13  | -0.15 | 0.03  | 0.69  | 0.15 | 0.11     | 0.73     | 2.40E-05 | NA | NA | NA | NA |
| -0.05 | -0.02 | -0.02 | 0.01  | 0.15 | 0.5      | 0.043    | 0.68     | NA | NA | NA | NA |
| 0.06  | 0.1   | 0     | 0.06  | 0.15 | 0.004    | 0.94     | 0.0015   | NA | NA | NA | NA |
| 0.35  | NA    | -0.39 | 0     | 0.15 | NA       | 0.018    | 1        | NA | NA | NA | NA |
| 0.06  | 0.14  | 0     | 0.03  | 0.16 | 0.011    | 1        | 0.21     | NA | NA | NA | NA |
| -0.11 | 0.25  | -0.05 | 0     | 0.16 | 0.33     | 0.04     | 1        | NA | NA | NA | NA |
| 0.04  | 0.03  | 0.01  | 0.01  | 0.16 | 0.11     | 0.58     | 0.6      | NA | NA | NA | NA |
| 0.3   | 0.2   | 0.01  | 0.02  | 0.17 | 0.17     | 0.85     | 0.74     | NA | NA | NA | NA |
| 0.03  | 0     | -0.08 | -0.05 | 0.18 | 1        | 3.90E-08 | 0.00031  | NA | NA | NA | NA |
| 0.16  | 0.09  | -0.03 | -0.02 | 0.18 | 0.34     | 0.2      | 0.48     | NA | NA | NA | NA |
| 0.07  | 0.05  | -0.07 | 0.01  | 0.18 | 0.36     | 0.017    | 0.94     | NA | NA | NA | NA |
| 0.06  | 0.12  | -0.04 | 0.05  | 0.18 | 0.0044   | 0.0015   | 0.0018   | NA | NA | NA | NA |
| -0.06 | -0.08 | -0.03 | 0.02  | 0.19 | 0.07     | 0.12     | 0.49     | NA | NA | NA | NA |
| -0.38 | 0.5   | -0.13 | -0.04 | 0.19 | 1        | 3.80E-06 | 0.37     | NA | NA | NA | NA |
| 0.05  | 0.04  | -0.04 | 0.04  | 0.19 | 0.73     | 0.059    | 0.07     | NA | NA | NA | NA |
| 0.08  | -0.01 | -0.07 | 0.02  | 0.19 | 0.9      | 0.013    | 0.67     | NA | NA | NA | NA |
| 0.9   | 0.02  | -0.24 | -0.15 | 0.2  | 0.89     | 0.17     | 0.6      | NA | NA | NA | NA |
| 0.04  | 0.12  | -0.05 | 0.02  | 0.2  | 0.00044  | 0.00012  | 0.25     | NA | NA | NA | NA |
| 0.03  | 0.08  | -0.07 | -0.03 | 0.2  | 0.0015   | 1.10E-05 | 0.12     | NA | NA | NA | NA |

|       |       |       |       |      |          |          |          |    |    |    |    |
|-------|-------|-------|-------|------|----------|----------|----------|----|----|----|----|
| 0.04  | 0.01  | -0.03 | 0.04  | 0.2  | 0.86     | 0.012    | 0.0059   | NA | NA | NA | NA |
| 0.04  | 0.06  | -0.02 | 0.01  | 0.2  | 0.078    | 0.32     | 0.54     | NA | NA | NA | NA |
| 0.04  | 0.16  | -0.04 | -0.01 | 0.2  | 4.50E-05 | 0.0091   | 0.64     | NA | NA | NA | NA |
| 0.9   | 0.31  | -0.06 | 0.01  | 0.21 | 0.0077   | 0.083    | 1        | NA | NA | NA | NA |
| -0.17 | -0.28 | -0.46 | NA    | 0.21 | 0.0089   | 2.80E-09 | NA       | NA | NA | NA | NA |
| 0.47  | -0.04 | -0.1  | -0.06 | 0.23 | 0.87     | 0.0019   | 0.22     | NA | NA | NA | NA |
| 0.03  | 0.01  | -0.08 | 0     | 0.23 | 0.52     | 5.90E-05 | 0.92     | NA | NA | NA | NA |
| -0.04 | -0.04 | -0.06 | -0.01 | 0.23 | 0.25     | 1.90E-05 | 0.54     | NA | NA | NA | NA |
| 0.05  | 0.07  | -0.01 | 0.07  | 0.23 | 0.065    | 0.65     | 0.00019  | NA | NA | NA | NA |
| 0.39  | -0.09 | -0.04 | 0.02  | 0.23 | 0.7      | 0.57     | 0.86     | NA | NA | NA | NA |
| -0.06 | -0.02 | 0.01  | -0.04 | 0.24 | 1        | 1        | 0.32     | NA | NA | NA | NA |
| -0.06 | 0.02  | -0.05 | -0.02 | 0.24 | 0.71     | 0.004    | 0.42     | NA | NA | NA | NA |
| 0.03  | 0.02  | -0.06 | 0.03  | 0.24 | 0.19     | 4.90E-07 | 0.016    | NA | NA | NA | NA |
| -0.04 | -0.02 | -0.04 | 0.02  | 0.25 | 0.41     | 0.00055  | 0.056    | NA | NA | NA | NA |
| -0.15 | -0.33 | -0.07 | -0.01 | 0.26 | 0.1      | 0.00018  | 0.66     | NA | NA | NA | NA |
| 0.16  | NA    | -0.01 | 0.08  | 0.27 | NA       | 0.89     | 0.0041   | NA | NA | NA | NA |
| 0.06  | 0.07  | -0.04 | 0.01  | 0.27 | 0.16     | 0.088    | 0.76     | NA | NA | NA | NA |
| 0.04  | -0.05 | -0.04 | 0.02  | 0.27 | 0.079    | 0.0013   | 0.18     | NA | NA | NA | NA |
| 0.08  | 0.02  | -0.03 | -0.05 | 0.27 | 0.77     | 0.39     | 0.037    | NA | NA | NA | NA |
| 0.08  | 0.35  | 0     | 0.16  | 0.28 | 1.50E-07 | 0.93     | 1.70E-08 | NA | NA | NA | NA |
| -0.05 | 0.17  | -0.02 | 0.05  | 0.28 | 0.0085   | 0.36     | 0.038    | NA | NA | NA | NA |
| 0.14  | 0.04  | 0.15  | 0.01  | 0.29 | 0.7      | 0.074    | 0.99     | NA | NA | NA | NA |
| -0.14 | 0.05  | 0.01  | 0.04  | 0.29 | 0.36     | 0.97     | 0.2      | NA | NA | NA | NA |
| 0.08  | 0.02  | -0.03 | 0.03  | 0.29 | 0.74     | 0.35     | 0.4      | NA | NA | NA | NA |
| 0.03  | 0.14  | 0     | 0.07  | 0.29 | 4.30E-06 | 0.87     | 0.00015  | NA | NA | NA | NA |
| 0.05  | -0.04 | -0.05 | 0.05  | 0.3  | 0.23     | 0.00028  | 0.00065  | NA | NA | NA | NA |
| 0.06  | 0.39  | -0.01 | 0.01  | 0.3  | 0.11     | 0.66     | 0.92     | NA | NA | NA | NA |
| -0.03 | -0.02 | 0     | 0.02  | 0.3  | 0.56     | 0.98     | 0.37     | NA | NA | NA | NA |
| -0.07 | 0.14  | -0.07 | 0.01  | 0.3  | 0.016    | 0.00012  | 0.83     | NA | NA | NA | NA |
| 0.07  | 0.01  | -0.08 | -0.01 | 0.3  | 1        | 7.50E-05 | 0.7      | NA | NA | NA | NA |



|       |       |       |       |      |          |          |          |    |    |    |    |
|-------|-------|-------|-------|------|----------|----------|----------|----|----|----|----|
| 0.19  | 0.35  | -0.1  | 0.02  | 0.3  | 0.029    | 0.0023   | 0.69     | NA | NA | NA | NA |
| -0.03 | -0.02 | -0.05 | -0.03 | 0.31 | 0.51     | 0.008    | 0.2      | NA | NA | NA | NA |
| 0.1   | 0.02  | -0.01 | 0.03  | 0.31 | 0.86     | 0.76     | 0.35     | NA | NA | NA | NA |
| 0.04  | 0.01  | -0.01 | 0.01  | 0.31 | 0.9      | 0.77     | 0.6      | NA | NA | NA | NA |
| -0.07 | 0.02  | -0.01 | 0.04  | 0.31 | 0.98     | 0.76     | 0.27     | NA | NA | NA | NA |
| 0.87  | 0.48  | -0.11 | -0.03 | 0.31 | 0.00025  | 0.056    | 0.92     | NA | NA | NA | NA |
| 0.04  | 0.06  | -0.02 | 0.04  | 0.32 | 0.067    | 0.19     | 0.07     | NA | NA | NA | NA |
| 0.85  | 0.16  | 0.04  | 0.05  | 0.33 | 0.11     | 0.22     | 0.094    | NA | NA | NA | NA |
| 0.02  | 0.02  | -0.03 | -0.02 | 0.33 | 0.23     | 0.099    | 0.21     | NA | NA | NA | NA |
| 0.06  | 0     | -0.07 | -0.05 | 0.34 | 1        | 0.00039  | 0.03     | NA | NA | NA | NA |
| 0.02  | -0.02 | -0.03 | -0.02 | 0.34 | 0.14     | 0.021    | 0.18     | NA | NA | NA | NA |
| -0.01 | 0.05  | -0.06 | -0.01 | 0.34 | 0.00041  | 2.60E-07 | 0.37     | NA | NA | NA | NA |
| -0.03 | 0.09  | -0.06 | 0.02  | 0.35 | 0.032    | 1.00E-04 | 0.31     | NA | NA | NA | NA |
| -0.47 | NA    | 0.06  | 0.37  | 0.35 | NA       | 0.26     | 1.90E-06 | NA | NA | NA | NA |
| 0.03  | 0.06  | -0.05 | -0.02 | 0.35 | 0.023    | 4.00E-04 | 0.27     | NA | NA | NA | NA |
| 0.16  | 0.36  | -0.01 | 0.03  | 0.35 | 0.2      | 0.72     | 0.35     | NA | NA | NA | NA |
| 0.05  | 0.01  | -0.06 | 0.01  | 0.36 | 0.67     | 0.00038  | 0.75     | NA | NA | NA | NA |
| 0.02  | -0.01 | -0.05 | 0     | 0.36 | 0.67     | 1.10E-08 | 0.89     | NA | NA | NA | NA |
| 0.41  | 0.33  | -0.01 | 0.24  | 0.36 | 6.00E-04 | 1        | 0.0072   | NA | NA | NA | NA |
| 0.07  | -0.05 | 0     | 0.14  | 0.37 | 0.28     | 0.95     | 9.00E-06 | NA | NA | NA | NA |
| 0.03  | 0.1   | -0.04 | -0.02 | 0.37 | 2.20E-06 | 0.00031  | 0.15     | NA | NA | NA | NA |
| -0.07 | 0.78  | -0.06 | 0.17  | 0.38 | 2.80E-08 | 0.075    | 6.10E-07 | NA | NA | NA | NA |
| -0.04 | 0     | -0.04 | 0.06  | 0.38 | 1        | 0.069    | 0.018    | NA | NA | NA | NA |
| 0.04  | 0.04  | -0.05 | 0.02  | 0.39 | 0.26     | 0.0011   | 0.32     | NA | NA | NA | NA |
| -0.06 | 0.03  | -0.12 | -0.05 | 0.39 | 0.96     | 2.60E-05 | 0.22     | NA | NA | NA | NA |
| 0.05  | -0.01 | -0.02 | -0.01 | 0.39 | 1        | 0.54     | 0.73     | NA | NA | NA | NA |
| 0.02  | 0.03  | -0.04 | -0.02 | 0.39 | 0.17     | 0.0085   | 0.19     | NA | NA | NA | NA |
| -0.01 | -0.01 | -0.05 | -0.01 | 0.39 | 0.68     | 0.016    | 0.56     | NA | NA | NA | NA |
| -0.5  | NA    | 0.04  | 0.05  | 0.39 | NA       | 0.51     | 0.47     | NA | NA | NA | NA |
| 0.06  | -0.02 | -0.04 | -0.02 | 0.4  | 0.72     | 0.0022   | 0.25     | NA | NA | NA | NA |

|       |       |       |       |      |          |          |          |    |    |    |    |
|-------|-------|-------|-------|------|----------|----------|----------|----|----|----|----|
| 0.16  | 0.22  | -0.1  | 0.03  | 0.4  | 0.0013   | 0.00029  | 0.38     | NA | NA | NA | NA |
| 0.02  | 0.03  | -0.06 | -0.02 | 0.41 | 0.21     | 0.011    | 0.42     | NA | NA | NA | NA |
| 0.04  | 0.09  | 0     | 0.05  | 0.42 | 0.018    | 0.95     | 0.034    | NA | NA | NA | NA |
| 0.09  | 0.04  | -0.04 | 0     | 0.42 | 0.85     | 0.15     | 1        | NA | NA | NA | NA |
| -0.13 | 0.25  | -0.06 | 0.06  | 0.42 | 0.26     | 0.0053   | 0.059    | NA | NA | NA | NA |
| -0.18 | -0.11 | -0.16 | -0.08 | 0.43 | 0.53     | 6.20E-07 | 0.016    | NA | NA | NA | NA |
| 0.05  | 0.37  | -0.04 | 0.06  | 0.43 | 9.90E-05 | 0.076    | 0.057    | NA | NA | NA | NA |
| 0.86  | 0.03  | 0.01  | 0.05  | 0.44 | 1        | 0.91     | 0.36     | NA | NA | NA | NA |
| -0.05 | -0.04 | -0.05 | 0     | 0.44 | 0.5      | 0.051    | 0.99     | NA | NA | NA | NA |
| 0.03  | 0     | -0.05 | -0.01 | 0.44 | 0.99     | 9.40E-05 | 0.43     | NA | NA | NA | NA |
| 0.04  | 0.14  | -0.06 | -0.01 | 0.45 | 0.0063   | 7.10E-05 | 0.46     | NA | NA | NA | NA |
| 0.02  | 0.05  | -0.01 | 0.02  | 0.45 | 0.074    | 0.54     | 0.1      | NA | NA | NA | NA |
| 0.04  | 0.1   | -0.07 | -0.02 | 0.46 | 0.011    | 0.00014  | 0.48     | NA | NA | NA | NA |
| 0.02  | 0.03  | -0.09 | -0.07 | 0.47 | 0.092    | 3.80E-09 | 4.60E-07 | NA | NA | NA | NA |
| -0.1  | -0.01 | 0.02  | 0.05  | 0.48 | 1        | 0.57     | 0.13     | NA | NA | NA | NA |
| -0.02 | -0.03 | -0.01 | 0.05  | 0.48 | 0.15     | 0.31     | 0.00024  | NA | NA | NA | NA |
| 0.04  | 0.09  | -0.02 | -0.03 | 0.48 | 0.052    | 0.54     | 0.21     | NA | NA | NA | NA |
| -0.05 | 0.03  | -0.03 | 0.03  | 0.48 | 0.81     | 0.23     | 0.11     | NA | NA | NA | NA |
| -0.02 | 0     | 0     | 0.04  | 0.49 | 0.87     | 0.95     | 0.014    | NA | NA | NA | NA |
| 0.04  | 0.04  | -0.01 | 0.04  | 0.49 | 0.3      | 0.5      | 0.01     | NA | NA | NA | NA |
| 0.01  | 0.01  | -0.04 | 0.01  | 0.49 | 0.73     | 9.40E-05 | 0.56     | NA | NA | NA | NA |
| 0.04  | 0.07  | -0.06 | -0.03 | 0.49 | 0.2      | 0.00065  | 0.11     | NA | NA | NA | NA |
| 0.03  | 0.22  | -0.04 | -0.02 | 0.5  | 4.70E-06 | 0.06     | 0.44     | NA | NA | NA | NA |
| 0.1   | 0.16  | -0.06 | -0.03 | 0.51 | 0.11     | 0.21     | 0.54     | NA | NA | NA | NA |
| -0.06 | -0.04 | -0.06 | 0     | 0.51 | 0.16     | 0.00026  | 0.89     | NA | NA | NA | NA |
| -0.04 | 0.18  | -0.04 | 0.01  | 0.52 | 0.00037  | 0.042    | 0.77     | NA | NA | NA | NA |
| -0.03 | 0.04  | -0.06 | -0.09 | 0.52 | 0.34     | 0.0037   | 1.00E-05 | NA | NA | NA | NA |
| 0.04  | 0.11  | 0.02  | -0.03 | 0.54 | 0.13     | 0.66     | 0.35     | NA | NA | NA | NA |
| 0.05  | -0.04 | -0.05 | 0     | 0.55 | 0.42     | 0.0065   | 1        | NA | NA | NA | NA |
| -0.05 | -0.1  | -0.02 | 0.06  | 0.55 | 0.072    | 0.48     | 0.024    | NA | NA | NA | NA |

|       |       |       |       |      |         |          |          |    |    |    |    |
|-------|-------|-------|-------|------|---------|----------|----------|----|----|----|----|
| 0.38  | -0.12 | -0.02 | 0.03  | 0.55 | 0.9     | 0.66     | 0.33     | NA | NA | NA | NA |
| -0.04 | 0.08  | -0.05 | 0.11  | 0.56 | 0.27    | 0.024    | 4.10E-06 | NA | NA | NA | NA |
| 0.02  | 0.05  | 0.02  | 0.04  | 0.56 | 0.0097  | 0.11     | 0.0071   | NA | NA | NA | NA |
| 0.06  | 0.29  | -0.04 | -0.05 | 0.56 | 0.031   | 0.38     | 0.094    | NA | NA | NA | NA |
| -0.11 | -0.11 | -0.01 | 0.05  | 0.57 | 0.46    | 0.8      | 0.047    | NA | NA | NA | NA |
| 0.02  | 0.01  | -0.03 | -0.02 | 0.57 | 0.62    | 0.029    | 0.2      | NA | NA | NA | NA |
| 0.03  | -0.06 | -0.1  | -0.06 | 0.58 | 0.11    | 5.50E-07 | 0.011    | NA | NA | NA | NA |
| 0.02  | 0.1   | -0.08 | 0.02  | 0.58 | 0.024   | 3.70E-06 | 0.45     | NA | NA | NA | NA |
| -0.8  | NA    | NA    | NA    | 0.59 | NA      | NA       | NA       | NA | NA | NA | NA |
| -0.15 | -0.02 | -0.08 | -0.02 | 0.59 | 1       | 8.90E-05 | 0.4      | NA | NA | NA | NA |
| 0.47  | 0.35  | -0.17 | -0.14 | 0.59 | 0.065   | 0.66     | 0.69     | NA | NA | NA | NA |
| 0.05  | 0.02  | -0.03 | 0.08  | 0.59 | 0.9     | 0.2      | 0.0083   | NA | NA | NA | NA |
| 0.05  | 0.15  | -0.1  | 0.01  | 0.6  | 0.025   | 0.0011   | 0.79     | NA | NA | NA | NA |
| -0.5  | -0.67 | -0.09 | NA    | 0.61 | 0.21    | 0.81     | NA       | NA | NA | NA | NA |
| -0.13 | -0.01 | -0.07 | 0     | 0.61 | 1       | 0.0039   | 1        | NA | NA | NA | NA |
| -0.05 | -0.04 | -0.13 | -0.11 | 0.61 | 0.61    | 3.60E-06 | 3.80E-05 | NA | NA | NA | NA |
| 0.04  | -0.02 | -0.06 | 0.05  | 0.62 | 0.83    | 0.0027   | 0.021    | NA | NA | NA | NA |
| 0.07  | 0.13  | -0.14 | -0.07 | 0.62 | 0.23    | 0.00062  | 0.18     | NA | NA | NA | NA |
| 0.02  | 0.22  | -0.05 | 0     | 0.64 | 0.00027 | 0.019    | 0.89     | NA | NA | NA | NA |
| 0.03  | 0.04  | -0.04 | 0.04  | 0.65 | 0.44    | 0.032    | 0.053    | NA | NA | NA | NA |
| -0.05 | -0.09 | -0.07 | 0.15  | 0.65 | 0.097   | 0.0036   | 1.40E-06 | NA | NA | NA | NA |
| 0.05  | 0.03  | -0.05 | -0.06 | 0.66 | 1       | 0.046    | 0.012    | NA | NA | NA | NA |
| 0.03  | 0     | -0.03 | 0.03  | 0.66 | 1       | 0.14     | 0.27     | NA | NA | NA | NA |
| -0.05 | -0.04 | -0.05 | -0.05 | 0.67 | 0.36    | 0.035    | 0.054    | NA | NA | NA | NA |
| -0.04 | 0.09  | -0.03 | 0.01  | 0.67 | 0.32    | 0.22     | 0.48     | NA | NA | NA | NA |
| 0.04  | 0.06  | -0.08 | 0.03  | 0.67 | 0.7     | 0.0056   | 0.6      | NA | NA | NA | NA |
| -0.03 | 0.05  | -0.05 | 0.12  | 0.68 | 0.33    | 0.0043   | 0.00011  | NA | NA | NA | NA |
| 0.03  | -0.02 | -0.05 | -0.03 | 0.69 | 0.9     | 0.042    | 0.37     | NA | NA | NA | NA |
| -0.03 | 0     | -0.03 | 0.01  | 0.69 | 1       | 0.18     | 0.85     | NA | NA | NA | NA |
| -0.02 | -0.03 | -0.08 | 0.02  | 0.7  | 0.64    | 5.50E-05 | 0.37     | NA | NA | NA | NA |

|       |       |       |       |      |          |          |          |    |    |    |    |
|-------|-------|-------|-------|------|----------|----------|----------|----|----|----|----|
| 0.01  | 0.03  | -0.03 | -0.02 | 0.7  | 0.3      | 0.031    | 0.29     | NA | NA | NA | NA |
| 0.04  | 0.11  | 0.05  | 0.15  | 0.7  | 0.0071   | 0.13     | 1.60E-06 | NA | NA | NA | NA |
| -0.02 | 0.06  | -0.04 | 0     | 0.7  | 0.12     | 0.028    | 1        | NA | NA | NA | NA |
| 0.09  | 0.01  | -0.13 | -0.04 | 0.71 | 1        | 0.00012  | 0.38     | NA | NA | NA | NA |
| 0.01  | 0.12  | -0.03 | 0.05  | 0.71 | 4.50E-06 | 0.059    | 0.0052   | NA | NA | NA | NA |
| 0.01  | 0.06  | -0.01 | 0.05  | 0.71 | 0.0041   | 0.12     | 2.30E-06 | NA | NA | NA | NA |
| 0.01  | 0.03  | -0.09 | -0.05 | 0.71 | 0.27     | 5.10E-06 | 0.0087   | NA | NA | NA | NA |
| -0.01 | -0.01 | -0.01 | 0.06  | 0.72 | 0.96     | 0.7      | 0.002    | NA | NA | NA | NA |
| 0.02  | 0.09  | -0.04 | -0.04 | 0.72 | 0.024    | 0.23     | 0.27     | NA | NA | NA | NA |
| 0.01  | 0.07  | -0.03 | 0.04  | 0.72 | 3.10E-07 | 0.00086  | 0.0039   | NA | NA | NA | NA |
| -0.06 | -0.02 | -0.01 | 0.06  | 0.73 | 1        | 0.85     | 0.12     | NA | NA | NA | NA |
| -0.12 | -0.08 | 0.02  | 0.08  | 0.73 | 0.62     | 0.31     | 0.0052   | NA | NA | NA | NA |
| -0.01 | -0.01 | -0.03 | 0     | 0.73 | 0.65     | 0.11     | 1        | NA | NA | NA | NA |
| -0.14 | 0.26  | -0.01 | 0.07  | 0.73 | 0.11     | 0.92     | 0.16     | NA | NA | NA | NA |
| 0.03  | 0.05  | -0.02 | 0.11  | 0.73 | 0.53     | 0.38     | 4.40E-07 | NA | NA | NA | NA |
| -0.09 | -0.06 | -0.05 | -0.05 | 0.74 | 0.9      | 0.098    | 0.24     | NA | NA | NA | NA |
| -0.01 | -0.02 | -0.06 | -0.06 | 0.75 | 0.33     | 0.007    | 0.0097   | NA | NA | NA | NA |
| -0.1  | 0.25  | -0.03 | 0.02  | 0.75 | 9.00E-04 | 0.2      | 0.54     | NA | NA | NA | NA |
| 0.02  | 0.03  | -0.05 | 0.04  | 0.76 | 0.38     | 0.023    | 0.19     | NA | NA | NA | NA |
| -0.04 | 0.14  | 0.01  | 0.01  | 0.77 | 0.16     | 0.77     | 0.93     | NA | NA | NA | NA |
| -0.04 | -0.03 | -0.04 | 0.07  | 0.77 | 0.53     | 0.039    | 0.00075  | NA | NA | NA | NA |
| 0.33  | 0.06  | -0.04 | 0.04  | 0.77 | 0.4      | 0.036    | 0.089    | NA | NA | NA | NA |
| 0.01  | 0     | -0.05 | -0.02 | 0.77 | 0.87     | 0.0028   | 0.29     | NA | NA | NA | NA |
| 0.06  | -0.06 | -0.26 | -0.08 | 0.78 | 0.83     | 8.60E-08 | 0.25     | NA | NA | NA | NA |
| 0.04  | 0.03  | -0.02 | 0.03  | 0.78 | 0.4      | 0.46     | 0.3      | NA | NA | NA | NA |
| -0.02 | -0.05 | -0.05 | 0     | 0.78 | 0.33     | 0.012    | 1        | NA | NA | NA | NA |
| 0.04  | 0.02  | -0.13 | -0.04 | 0.79 | 0.8      | 0.00012  | 0.34     | NA | NA | NA | NA |
| 0.01  | 0.02  | -0.03 | -0.02 | 0.79 | 0.38     | 0.15     | 0.44     | NA | NA | NA | NA |
| 0.03  | -0.05 | 0.03  | 0.09  | 0.79 | 0.38     | 0.12     | 2.10E-05 | NA | NA | NA | NA |
| -0.25 | -0.18 | -0.1  | -0.02 | 0.8  | 0.87     | 0.53     | 1        | NA | NA | NA | NA |

|       |       |       |       |      |          |          |          |    |    |    |    |
|-------|-------|-------|-------|------|----------|----------|----------|----|----|----|----|
| -0.01 | 0     | -0.03 | 0.01  | 0.8  | 1        | 0.023    | 0.59     | NA | NA | NA | NA |
| -0.15 | -0.19 | 0.01  | 0.13  | 0.8  | 0.16     | 0.94     | 0.042    | NA | NA | NA | NA |
| 0.03  | 0.03  | -0.06 | -0.05 | 0.81 | 0.73     | 0.065    | 0.077    | NA | NA | NA | NA |
| 0.02  | 0.08  | -0.03 | 0.03  | 0.82 | 0.046    | 0.019    | 0.11     | NA | NA | NA | NA |
| 0.01  | 0     | -0.07 | 0     | 0.83 | 0.99     | 5.50E-08 | 0.8      | NA | NA | NA | NA |
| 0.01  | 0.11  | -0.02 | 0.02  | 0.83 | 0.0059   | 0.41     | 0.38     | NA | NA | NA | NA |
| 0.09  | -0.05 | -0.04 | 0.12  | 0.83 | 0.72     | 0.2      | 0.00043  | NA | NA | NA | NA |
| -0.03 | 0     | -0.01 | 0.02  | 0.83 | 1        | 0.62     | 0.37     | NA | NA | NA | NA |
| -0.01 | -0.05 | 0     | 0.04  | 0.83 | 0.00087  | 0.92     | 0.002    | NA | NA | NA | NA |
| -0.04 | 0.01  | -0.02 | -0.04 | 0.84 | 1        | 0.48     | 0.071    | NA | NA | NA | NA |
| -0.02 | 0.32  | -0.07 | 0.04  | 0.84 | 3.30E-08 | 0.0061   | 0.15     | NA | NA | NA | NA |
| 0.23  | 0.02  | -0.08 | -0.04 | 0.84 | 1        | 0.0068   | 0.23     | NA | NA | NA | NA |
| -0.01 | 0.02  | -0.01 | -0.01 | 0.85 | 0.74     | 0.56     | 0.81     | NA | NA | NA | NA |
| 0.02  | -0.01 | 0.02  | 0.07  | 0.85 | 0.91     | 0.33     | 0.007    | NA | NA | NA | NA |
| 0.02  | 0.02  | -0.01 | 0.05  | 0.85 | 0.79     | 0.81     | 0.0054   | NA | NA | NA | NA |
| -0.05 | 0.11  | -0.06 | 0.01  | 0.86 | 0.67     | 0.037    | 0.94     | NA | NA | NA | NA |
| 0.05  | -0.06 | -0.05 | 0.01  | 0.87 | 0.51     | 0.01     | 0.84     | NA | NA | NA | NA |
| 0.03  | 0.09  | -0.03 | 0.02  | 0.88 | 0.17     | 0.25     | 0.58     | NA | NA | NA | NA |
| 0.19  | 0.36  | -0.13 | -0.07 | 0.88 | 0.43     | 0.0022   | 0.47     | NA | NA | NA | NA |
| 0.08  | -0.04 | -0.1  | -0.11 | 0.89 | 0.57     | 0.00019  | 3.00E-04 | NA | NA | NA | NA |
| 0.06  | 0.01  | 0.01  | 0.06  | 0.9  | 1        | 0.8      | 0.22     | NA | NA | NA | NA |
| 0.02  | -0.02 | -0.03 | -0.02 | 0.9  | 1        | 0.21     | 0.43     | NA | NA | NA | NA |
| -0.01 | 0.05  | -0.07 | 0     | 0.9  | 0.025    | 0.00029  | 1        | NA | NA | NA | NA |
| -0.01 | 0.11  | -0.04 | 0     | 0.9  | 0.0037   | 0.012    | 0.87     | NA | NA | NA | NA |
| 0.03  | 0.09  | -0.02 | 0.01  | 0.91 | 0.59     | 0.24     | 0.56     | NA | NA | NA | NA |
| 0.14  | -0.01 | 0.04  | 0.11  | 0.91 | 1        | 0.22     | 0.0012   | NA | NA | NA | NA |
| -0.02 | -0.07 | -0.11 | -0.03 | 0.91 | 0.047    | 0.00054  | 0.63     | NA | NA | NA | NA |
| -0.05 | 0.04  | -0.06 | -0.05 | 0.91 | 0.82     | 0.011    | 0.017    | NA | NA | NA | NA |
| 0.01  | -0.06 | -0.05 | 0.02  | 0.91 | 0.21     | 0.0063   | 0.44     | NA | NA | NA | NA |
| 0.08  | -0.02 | 0.03  | 0.17  | 0.91 | 0.75     | 0.47     | 2.10E-05 | NA | NA | NA | NA |

|       |       |       |       |      |          |          |          |    |    |    |    |
|-------|-------|-------|-------|------|----------|----------|----------|----|----|----|----|
| 0.01  | 0.01  | -0.04 | -0.04 | 0.93 | 0.92     | 0.002    | 0.0011   | NA | NA | NA | NA |
| -0.06 | 0.44  | -0.02 | 0.01  | 0.95 | 0.013    | 0.63     | 0.99     | NA | NA | NA | NA |
| 0.02  | -0.09 | -0.03 | 0.03  | 0.96 | 0.048    | 0.0092   | 0.15     | NA | NA | NA | NA |
| 0.01  | 0.28  | -0.08 | -0.04 | 0.96 | 9.30E-09 | 8.00E-06 | 0.11     | NA | NA | NA | NA |
| 0.03  | -0.12 | -0.16 | -0.08 | 0.97 | 0.41     | 5.20E-07 | 0.15     | NA | NA | NA | NA |
| 0.04  | -0.03 | 0.09  | 0.02  | 0.97 | 0.67     | 0.01     | 0.7      | NA | NA | NA | NA |
| -0.11 | -0.18 | 0.01  | -0.11 | 0.97 | 0.13     | 1        | 0.053    | NA | NA | NA | NA |
| 0.28  | 0.12  | -0.11 | 0.13  | 0.97 | 1        | 0.00011  | 0.0027   | NA | NA | NA | NA |
| 0.01  | 0     | -0.05 | -0.02 | 0.97 | 0.97     | 0.0053   | 0.36     | NA | NA | NA | NA |
| 0.02  | 0.02  | 0.01  | 0     | 0.98 | 0.52     | 0.74     | 1        | NA | NA | NA | NA |
| -0.02 | 0.06  | -0.05 | -0.02 | 0.98 | 0.68     | 0.046    | 0.64     | NA | NA | NA | NA |
| -0.07 | 0.82  | -0.08 | -0.08 | 0.98 | 0.0017   | 0.21     | 0.1      | NA | NA | NA | NA |
| -0.02 | -0.02 | 0     | 0.04  | 0.98 | 0.51     | 1        | 0.43     | NA | NA | NA | NA |
| 0.01  | 0.06  | -0.18 | -0.15 | 0.98 | 0.077    | 5.40E-09 | 9.60E-05 | NA | NA | NA | NA |
| -0.01 | -0.01 | 0.02  | 0.03  | 0.98 | 1        | 0.21     | 0.07     | NA | NA | NA | NA |
| 0.04  | 0.05  | -0.03 | -0.01 | 0.98 | 1        | 0.11     | 0.85     | NA | NA | NA | NA |
| 0.01  | -0.04 | -0.02 | 0.01  | 0.98 | 0.18     | 0.35     | 0.75     | NA | NA | NA | NA |
| -0.01 | -0.01 | -0.04 | 0.05  | 0.99 | 0.83     | 0.0023   | 0.0089   | NA | NA | NA | NA |
| -0.02 | 0.45  | -0.02 | -0.01 | 0.99 | 0.28     | 0.36     | 0.77     | NA | NA | NA | NA |
| 0     | 0.05  | -0.06 | -0.02 | 0.99 | 0.11     | 7.30E-06 | 0.19     | NA | NA | NA | NA |
| -0.01 | -0.12 | -0.16 | -0.08 | 1    | 0.68     | 8.70E-05 | 0.25     | NA | NA | NA | NA |
| 0     | -0.06 | -0.03 | -0.02 | 1    | 0.058    | 0.089    | 0.14     | NA | NA | NA | NA |
| -0.05 | 0.07  | 0.03  | 0.04  | 1    | 0.69     | 0.26     | 0.18     | NA | NA | NA | NA |
| 0     | 0.1   | -0.03 | -0.01 | 1    | 0.02     | 0.089    | 0.44     | NA | NA | NA | NA |
| 0     | -0.07 | 0     | 0.09  | 1    | 0.22     | 0.89     | 1.60E-05 | NA | NA | NA | NA |
| 0.05  | 0.09  | -0.11 | -0.06 | 1    | 0.91     | 0.0034   | 0.18     | NA | NA | NA | NA |
| 0.02  | 0.02  | -0.05 | -0.01 | 1    | 1        | 0.086    | 0.83     | NA | NA | NA | NA |
| 0.09  | 0.05  | -0.04 | 0.04  | 1    | 1        | 0.22     | 0.36     | NA | NA | NA | NA |
| -0.03 | 0.1   | -0.22 | -0.2  | 1    | 1        | 0.015    | 0.21     | NA | NA | NA | NA |
| 0     | 0.03  | 0     | 0.06  | 1    | 0.49     | 1        | 0.00042  | NA | NA | NA | NA |

|       |       |       |       |   |          |          |        |    |    |    |    |
|-------|-------|-------|-------|---|----------|----------|--------|----|----|----|----|
| -0.02 | -0.18 | -0.01 | 0.17  | 1 | 0.041    | 1        | 0.43   | NA | NA | NA | NA |
| 0.09  | 0.11  | 0.05  | 0.08  | 1 | 0.31     | 0.076    | 0.0017 | NA | NA | NA | NA |
| 0.01  | 0     | 0     | 0.01  | 1 | 1        | 1        | 1      | NA | NA | NA | NA |
| 0     | 0.03  | -0.04 | 0.02  | 1 | 0.41     | 0.0094   | 0.29   | NA | NA | NA | NA |
| 0.02  | 0.03  | -0.09 | -0.06 | 1 | 0.8      | 0.025    | 0.23   | NA | NA | NA | NA |
| 0     | 0.05  | -0.05 | -0.06 | 1 | 0.52     | 0.019    | 0.037  | NA | NA | NA | NA |
| -0.09 | -0.22 | 0.13  | 0     | 1 | 0.27     | 2.10E-05 | 1      | NA | NA | NA | NA |
| 0     | 0     | -0.01 | 0.01  | 1 | 1        | 0.74     | 0.65   | NA | NA | NA | NA |
| 0.02  | 0.09  | -0.02 | -0.01 | 1 | 0.038    | 0.62     | 0.91   | NA | NA | NA | NA |
| -0.06 | 0.21  | 0.29  | 0.18  | 1 | 0.31     | 0.00087  | 0.0094 | NA | NA | NA | NA |
| 0     | NA    | -0.07 | 0.1   | 1 | NA       | 0.062    | 0.068  | NA | NA | NA | NA |
| 0     | 0.2   | 0.01  | 0.03  | 1 | 4.20E-05 | 0.53     | 0.043  | NA | NA | NA | NA |
| 0.01  | -0.02 | 0.03  | -0.04 | 1 | 0.75     | 0.39     | 0.21   | NA | NA | NA | NA |
| 0.01  | 0.01  | -0.05 | -0.02 | 1 | 0.98     | 0.028    | 0.44   | NA | NA | NA | NA |
| 0.03  | 0.09  | -0.1  | -0.04 | 1 | 0.15     | 0.00019  | 0.37   | NA | NA | NA | NA |
| 0     | 0.07  | -0.03 | 0.02  | 1 | 0.067    | 0.1      | 0.41   | NA | NA | NA | NA |
| 0     | 0.11  | -0.07 | -0.04 | 1 | 0.31     | 0.094    | 0.39   | NA | NA | NA | NA |
| 0.02  | -0.14 | -0.03 | 0.08  | 1 | 0.074    | 0.31     | 0.018  | NA | NA | NA | NA |
| 0     | -0.09 | -0.07 | 0     | 1 | 0.00036  | 1.10E-09 | 0.94   | NA | NA | NA | NA |
| 0.03  | -0.01 | -0.06 | 0.02  | 1 | 0.9      | 0.0019   | 0.24   | NA | NA | NA | NA |
| 0.04  | -0.17 | 0.02  | 0.81  | 1 | 0.64     | 0.93     | 0.051  | NA | NA | NA | NA |
| 0.11  | -0.23 | -0.04 | 0.08  | 1 | 0.27     | 0.43     | 0.28   | NA | NA | NA | NA |
| -0.01 | 0.48  | -0.13 | -0.09 | 1 | 5.20E-06 | 6.40E-05 | 0.026  | NA | NA | NA | NA |
| 0.04  | 0.91  | -0.06 | -0.04 | 1 | 0.17     | 0.17     | 0.56   | NA | NA | NA | NA |
| 0     | -0.01 | -0.04 | -0.03 | 1 | 0.92     | 0.0019   | 0.062  | NA | NA | NA | NA |
| 0     | -0.05 | 0.01  | 0.04  | 1 | 0.39     | 0.87     | 0.34   | NA | NA | NA | NA |
| 0     | -0.01 | -0.07 | -0.02 | 1 | 0.89     | 0.1      | 0.74   | NA | NA | NA | NA |
| 0.02  | NA    | -0.1  | 0.08  | 1 | NA       | 0.0036   | 0.031  | NA | NA | NA | NA |
| -0.01 | -0.02 | -0.04 | 0.06  | 1 | 0.93     | 0.55     | 0.38   | NA | NA | NA | NA |
| -0.01 | 0.08  | 0.02  | 0.05  | 1 | 0.022    | 0.31     | 0.039  | NA | NA | NA | NA |

|       |       |       |       |   |       |          |          |    |    |    |    |
|-------|-------|-------|-------|---|-------|----------|----------|----|----|----|----|
| 0.02  | 0.36  | -0.02 | 0.1   | 1 | 0.013 | 0.51     | 0.0019   | NA | NA | NA | NA |
| -0.17 | NA    | -0.11 | 0.03  | 1 | NA    | 0.0083   | 0.46     | NA | NA | NA | NA |
| 0     | 0     | -0.2  | -0.03 | 1 | 1     | 0.005    | 0.83     | NA | NA | NA | NA |
| 0.18  | 0.01  | -0.14 | -0.07 | 1 | 1     | 1.70E-07 | 0.048    | NA | NA | NA | NA |
| 0.14  | 0.14  | -0.13 | 0.14  | 1 | 1     | 0.025    | 0.04     | NA | NA | NA | NA |
| -0.08 | 0.1   | -0.06 | 0.04  | 1 | 1     | 0.18     | 0.49     | NA | NA | NA | NA |
| 0.01  | 0.09  | -0.07 | -0.03 | 1 | 0.29  | 0.00029  | 0.26     | NA | NA | NA | NA |
| 0.03  | -0.07 | 0.03  | 0.05  | 1 | 0.45  | 0.49     | 0.36     | NA | NA | NA | NA |
| 0.01  | 0.06  | -0.12 | -0.01 | 1 | 0.33  | 0.0048   | 1        | NA | NA | NA | NA |
| -0.01 | -0.02 | -0.05 | 0.04  | 1 | 1     | 0.24     | 0.46     | NA | NA | NA | NA |
| 0     | 0.09  | -0.05 | -0.04 | 1 | 0.019 | 0.016    | 0.076    | NA | NA | NA | NA |
| -0.01 | -0.03 | 0.11  | 0.11  | 1 | 0.41  | 8.10E-08 | 1.60E-07 | NA | NA | NA | NA |
| 0.01  | 0.01  | -0.01 | 0.07  | 1 | 0.62  | 0.9      | 0.014    | NA | NA | NA | NA |
| -0.02 | -0.07 | -0.11 | 0.01  | 1 | 0.69  | 0.11     | 1        | NA | NA | NA | NA |
| 0.02  | NA    | -0.01 | 0.08  | 1 | NA    | 0.85     | 0.052    | NA | NA | NA | NA |
| 0     | -0.01 | -0.06 | 0     | 1 | 0.76  | 4.60E-07 | 0.86     | NA | NA | NA | NA |
| -0.01 | -0.07 | -0.08 | 0.05  | 1 | 0.34  | 0.003    | 0.11     | NA | NA | NA | NA |
| 0     | 0.03  | 0.04  | 0.14  | 1 | 0.83  | 0.19     | 5.80E-05 | NA | NA | NA | NA |
| 0.01  | -0.09 | -0.04 | -0.01 | 1 | 0.28  | 0.54     | 1        | NA | NA | NA | NA |
| 0     | -0.01 | -0.01 | 0.01  | 1 | 0.85  | 0.64     | 0.56     | NA | NA | NA | NA |
| -0.06 | -0.09 | -0.09 | -0.03 | 1 | 0.16  | 0.0036   | 0.56     | NA | NA | NA | NA |
| 0     | -0.01 | -0.04 | 0.06  | 1 | 0.67  | 0.1      | 0.051    | NA | NA | NA | NA |
| 0     | 0.02  | 0     | 0     | 1 | 0.66  | 0.99     | 0.99     | NA | NA | NA | NA |
| 0.5   | -0.25 | -0.19 | 0.01  | 1 | 0.49  | 0.0024   | 1        | NA | NA | NA | NA |
| 0.08  | 0.03  | -0.07 | 0.06  | 1 | 1     | 0.16     | 0.42     | NA | NA | NA | NA |
| 0     | 0     | -0.08 | 0     | 1 | 1     | 0.0016   | 1        | NA | NA | NA | NA |
| 0.01  | 0     | -0.03 | 0.03  | 1 | 1     | 0.16     | 0.17     | NA | NA | NA | NA |
| 0.04  | -0.08 | -0.07 | -0.06 | 1 | 0.29  | 0.16     | 0.12     | NA | NA | NA | NA |
| 0.12  | 0.25  | -0.09 | -0.06 | 1 | 0.41  | 0.19     | 0.61     | NA | NA | NA | NA |
| -0.08 | NA    | -0.03 | -0.04 | 1 | NA    | 0.5      | 0.32     | NA | NA | NA | NA |



|       |       |       |       |    |          |          |       |    |    |    |    |
|-------|-------|-------|-------|----|----------|----------|-------|----|----|----|----|
| 0.17  | -0.07 | 0.06  | 0.21  | 1  | 1        | 0.27     | 0.008 | NA | NA | NA | NA |
| -0.06 | -0.1  | -0.14 | -0.07 | 1  | 0.81     | 0.0048   | 0.43  | NA | NA | NA | NA |
| 0.3   | -0.03 | 0.01  | 0.04  | 1  | 1        | 0.85     | 0.21  | NA | NA | NA | NA |
| 0.53  | 0.53  | -0.58 | 0.09  | 1  | 0.51     | 0.0036   | 1     | NA | NA | NA | NA |
| 0     | 0.11  | -0.01 | 0.05  | 1  | 0.55     | 0.74     | 0.027 | NA | NA | NA | NA |
| 0.1   | NA    | -0.01 | 0.08  | 1  | NA       | 0.78     | 0.094 | NA | NA | NA | NA |
| 0     | 0.03  | -0.06 | -0.02 | 1  | 0.072    | 2.60E-07 | 0.25  | NA | NA | NA | NA |
| 0     | 0.15  | -0.04 | -0.03 | 1  | 1.40E-06 | 0.021    | 0.17  | NA | NA | NA | NA |
| 0.02  | 0.01  | -0.02 | 0.02  | 1  | 0.73     | 0.21     | 0.17  | NA | NA | NA | NA |
| 0     | 0.06  | -0.08 | -0.04 | 1  | 0.12     | 1.00E-05 | 0.056 | NA | NA | NA | NA |
| 0.01  | 0.09  | -0.02 | 0.01  | 1  | 0.044    | 0.1      | 0.57  | NA | NA | NA | NA |
| -0.01 | -0.08 | -0.01 | -0.03 | 1  | 0.91     | 0.76     | 0.55  | NA | NA | NA | NA |
| 0     | 0.08  | -0.04 | 0.04  | 1  | 0.29     | 0.63     | 0.68  | NA | NA | NA | NA |
| 0.13  | 0.47  | 0.05  | 0.22  | 1  | 0.35     | 0.71     | 0.062 | NA | NA | NA | NA |
| 0.14  | 0.14  | 0     | -0.03 | 1  | 0.34     | 1        | 0.87  | NA | NA | NA | NA |
| 0     | 0.03  | -0.05 | 0     | 1  | 0.59     | 0.00014  | 1     | NA | NA | NA | NA |
| NA    | NA    | NA    | NA    | NA | NA       | NA       | NA    | NA | NA | NA | NA |
| NA    | NA    | -0.03 | 0.01  | NA | NA       | 0.11     | 0.93  | NA | NA | NA | NA |
| NA    | NA    | NA    | NA    | NA | NA       | NA       | NA    | NA | NA | NA | NA |
| NA    | NA    | 0.04  | 0.07  | NA | NA       | 0.63     | 0.29  | NA | NA | NA | NA |
| NA    | NA    | NA    | NA    | NA | NA       | NA       | NA    | NA | NA | NA | NA |
| NA    | NA    | -0.35 | NA    | NA | NA       | 0.3      | NA    | NA | NA | NA | NA |
| NA    | NA    | 0.21  | NA    | NA | NA       | 1        | NA    | NA | NA | NA | NA |
| NA    | NA    | NA    | NA    | NA | NA       | NA       | NA    | NA | NA | NA | NA |
| NA    | NA    | 0.5   | NA    | NA | NA       | 0.48     | NA    | NA | NA | NA | NA |
| NA    | NA    | 0.08  | NA    | NA | NA       | 0.72     | NA    | NA | NA | NA | NA |
| NA    | 0.19  | -0.06 | 0.15  | NA | 0.41     | 0.26     | 0.45  | NA | NA | NA | NA |
| NA    | NA    | -0.05 | -0.26 | NA | NA       | 1        | 0.81  | NA | NA | NA | NA |
| NA    | NA    | 0.06  | 0.14  | NA | NA       | 0.27     | 0.025 | NA | NA | NA | NA |
| NA    | NA    | 0.07  | 0.17  | NA | NA       | 0.26     | 0.011 | NA | NA | NA | NA |

|    |       |       |       |    |        |          |         |    |    |    |    |
|----|-------|-------|-------|----|--------|----------|---------|----|----|----|----|
| NA | 0.36  | 0     | -0.1  | NA | 0.0021 | 1        | 0.12    | NA | NA | NA | NA |
| NA | NA    | NA    | NA    | NA | NA     | NA       | NA      | NA | NA | NA | NA |
| NA | 0.03  | -0.12 | -0.11 | NA | 1      | 0.067    | 0.059   | NA | NA | NA | NA |
| NA | 0.14  | -0.03 | -0.05 | NA | 0.47   | 0.3      | 0.055   | NA | NA | NA | NA |
| NA | NA    | -0.06 | 0.09  | NA | NA     | 0.44     | 0.34    | NA | NA | NA | NA |
| NA | NA    | 0     | NA    | NA | NA     | 1        | NA      | NA | NA | NA | NA |
| NA | NA    | -0.13 | -0.07 | NA | NA     | 0.18     | 0.68    | NA | NA | NA | NA |
| NA | NA    | -0.54 | 0     | NA | NA     | 2.10E-05 | 1       | NA | NA | NA | NA |
| NA | 0.18  | -0.03 | 0.13  | NA | 0.082  | 0.28     | 0.00021 | NA | NA | NA | NA |
| NA | NA    | NA    | 0.08  | NA | NA     | NA       | 1       | NA | NA | NA | NA |
| NA | NA    | 0.5   | NA    | NA | NA     | 1        | NA      | NA | NA | NA | NA |
| NA | -0.03 | -0.01 | 0.1   | NA | 1      | 0.94     | 0.17    | NA | NA | NA | NA |
| NA | NA    | -0.03 | 0.09  | NA | NA     | 0.27     | 0.0041  | NA | NA | NA | NA |
| NA | 0.25  | -0.07 | 0.3   | NA | 1      | 0.36     | 0.0074  | NA | NA | NA | NA |
| NA | NA    | -0.08 | -0.09 | NA | NA     | 0.36     | 0.2     | NA | NA | NA | NA |
| NA | NA    | 0.15  | NA    | NA | NA     | 0.093    | NA      | NA | NA | NA | NA |
| NA | 0.83  | 0.08  | 0.12  | NA | 0.12   | 0.84     | 0.84    | NA | NA | NA | NA |
| NA | 0     | -0.18 | -0.18 | NA | 1      | 2.80E-05 | 0.12    | NA | NA | NA | NA |
| NA | 0.32  | 0.01  | 0     | NA | 0.0054 | 0.83     | 1       | NA | NA | NA | NA |
| NA | NA    | -0.35 | NA    | NA | NA     | 0.25     | NA      | NA | NA | NA | NA |
| NA | 0.3   | -0.07 | 0.13  | NA | 0.25   | 0.086    | 0.013   | NA | NA | NA | NA |
| NA | 0.5   | -0.13 | 0.01  | NA | 0.61   | 3.00E-04 | 0.93    | NA | NA | NA | NA |
| NA | 0.06  | 0.03  | 0.22  | NA | 0.94   | 0.61     | 0.00048 | NA | NA | NA | NA |
| NA | NA    | 0.04  | 0.04  | NA | NA     | 0.57     | 0.48    | NA | NA | NA | NA |
| NA | NA    | -0.32 | -0.2  | NA | NA     | 7.80E-05 | 0.092   | NA | NA | NA | NA |
| NA | NA    | 0.01  | 0     | NA | NA     | 0.88     | 1       | NA | NA | NA | NA |
| NA | NA    | -0.11 | NA    | NA | NA     | 0.25     | NA      | NA | NA | NA | NA |
| NA | NA    | -0.05 | 0.03  | NA | NA     | 0.3      | 0.72    | NA | NA | NA | NA |
| NA | NA    | NA    | NA    | NA | NA     | NA       | NA      | NA | NA | NA | NA |
| NA | NA    | -0.1  | 0.03  | NA | NA     | 0.00076  | 0.62    | NA | NA | NA | NA |

|    |       |       |       |    |        |       |          |    |    |    |    |
|----|-------|-------|-------|----|--------|-------|----------|----|----|----|----|
| NA | NA    | NA    | 0.11  | NA | NA     | NA    | 0.097    | NA | NA | NA | NA |
| NA | NA    | -0.08 | -0.04 | NA | NA     | 0.25  | 0.71     | NA | NA | NA | NA |
| NA | NA    | 0.67  | NA    | NA | NA     | 1     | NA       | NA | NA | NA | NA |
| NA | 0.15  | -0.02 | -0.08 | NA | 0.071  | 0.6   | 0.0086   | NA | NA | NA | NA |
| NA | NA    | 0.1   | 0.14  | NA | NA     | 0.17  | 0.014    | NA | NA | NA | NA |
| NA | NA    | NA    | NA    | NA | NA     | NA    | NA       | NA | NA | NA | NA |
| NA | -0.07 | -0.04 | -0.02 | NA | 0.45   | 0.097 | 0.56     | NA | NA | NA | NA |
| NA | 0.13  | -0.01 | 0.15  | NA | 0.61   | 1     | 0.14     | NA | NA | NA | NA |
| NA | NA    | NA    | NA    | NA | NA     | NA    | NA       | NA | NA | NA | NA |
| NA | -0.06 | -0.05 | 0.03  | NA | 0.61   | 0.26  | 0.44     | NA | NA | NA | NA |
| NA | NA    | -0.09 | -0.03 | NA | NA     | 0.051 | 0.72     | NA | NA | NA | NA |
| NA | NA    | NA    | NA    | NA | NA     | NA    | NA       | NA | NA | NA | NA |
| NA | NA    | -0.01 | -0.01 | NA | NA     | 0.75  | 1        | NA | NA | NA | NA |
| NA | NA    | -0.36 | 0     | NA | NA     | 0.04  | 1        | NA | NA | NA | NA |
| NA | NA    | 0.05  | 0.05  | NA | NA     | 0.69  | 0.93     | NA | NA | NA | NA |
| NA | NA    | -0.02 | 0.09  | NA | NA     | 0.41  | 0.014    | NA | NA | NA | NA |
| NA | NA    | 0.03  | 0.11  | NA | NA     | 0.54  | 0.29     | NA | NA | NA | NA |
| NA | NA    | -0.14 | 0.62  | NA | NA     | 0.16  | 0.31     | NA | NA | NA | NA |
| NA | NA    | -0.02 | NA    | NA | NA     | 1     | NA       | NA | NA | NA | NA |
| NA | 0.06  | -0.06 | -0.04 | NA | 0.45   | 0.12  | 0.4      | NA | NA | NA | NA |
| NA | 0.01  | -0.05 | -0.03 | NA | 1      | 0.31  | 0.43     | NA | NA | NA | NA |
| NA | NA    | NA    | NA    | NA | NA     | NA    | NA       | NA | NA | NA | NA |
| NA | -0.27 | -0.04 | 0.15  | NA | 0.0052 | 0.59  | 5.00E-04 | NA | NA | NA | NA |
| NA | NA    | 0     | NA    | NA | NA     | 1     | NA       | NA | NA | NA | NA |
| NA | NA    | NA    | NA    | NA | NA     | NA    | NA       | NA | NA | NA | NA |
| NA | -0.04 | -0.02 | 0.11  | NA | 1      | 0.98  | 0.36     | NA | NA | NA | NA |
| NA | NA    | 0.11  | 0.29  | NA | NA     | 0.1   | 8.30E-05 | NA | NA | NA | NA |
| NA | 0.88  | 0.05  | 0.05  | NA | 0.38   | 0.64  | 0.54     | NA | NA | NA | NA |
| NA | NA    | -0.13 | -0.03 | NA | NA     | 0.3   | 1        | NA | NA | NA | NA |
| NA | NA    | 0.01  | 0.29  | NA | NA     | 0.97  | 0.0059   | NA | NA | NA | NA |

|      |       |       |       |          |          |          |         |    |    |    |    |
|------|-------|-------|-------|----------|----------|----------|---------|----|----|----|----|
| NA   | 0.08  | -0.14 | -0.08 | NA       | 1        | 0.33     | 0.66    | NA | NA | NA | NA |
| NA   | NA    | -0.01 | 0.44  | NA       | NA       | 1        | 0.001   | NA | NA | NA | NA |
| NA   | NA    | -0.03 | 0.85  | NA       | NA       | 1        | 0.47    | NA | NA | NA | NA |
| NA   | 0.69  | -0.07 | 0.01  | NA       | 0.021    | 0.36     | 1       | NA | NA | NA | NA |
| NA   | 0.06  | -0.03 | 0.05  | NA       | 0.54     | 0.19     | 0.084   | NA | NA | NA | NA |
| NA   | NA    | 0.52  | 0.1   | NA       | NA       | 0.25     | 0.95    | NA | NA | NA | NA |
| NA   | NA    | -0.11 | -0.11 | NA       | NA       | 0.11     | 0.11    | NA | NA | NA | NA |
| NA   | -0.41 | 0.02  | 0.09  | NA       | 0.16     | 0.82     | 0.18    | NA | NA | NA | NA |
| NA   | NA    | -0.16 | 0     | NA       | NA       | 0.65     | 1       | NA | NA | NA | NA |
| NA   | NA    | -0.04 | 0.29  | NA       | NA       | 1        | 0.34    | NA | NA | NA | NA |
| NA   | NA    | -0.1  | -0.07 | NA       | NA       | 0.17     | 0.64    | NA | NA | NA | NA |
| NA   | NA    | -0.38 | NA    | NA       | NA       | 0.018    | NA      | NA | NA | NA | NA |
| NA   | NA    | -0.13 | -0.1  | NA       | NA       | 0.94     | 1       | NA | NA | NA | NA |
| 0.11 | 0.12  | -0.01 | 0.04  | 1.20E-08 | 3.70E-07 | 0.46     | 0.061   | NA | NA | NA | NA |
| 0.25 | 0.08  | 0     | 0.05  | 2.90E-08 | 0.0049   | 0.93     | 0.00067 | NA | NA | NA | NA |
| 0.26 | 0.08  | 0.15  | 0.16  | 5.80E-08 | 0.072    | 0.00022  | 0.00071 | NA | NA | NA | NA |
| 0.17 | 0.06  | -0.07 | 0.05  | 1.30E-07 | 0.036    | 2.80E-06 | 0.012   | NA | NA | NA | NA |
| 0.45 | 0.09  | -0.04 | 0.04  | 1.00E-05 | 0.067    | 0.082    | 0.14    | NA | NA | NA | NA |
| 0.2  | 0.04  | -0.03 | 0.04  | 1.30E-05 | 0.14     | 0.054    | 0.011   | NA | NA | NA | NA |
| 0.25 | 0.16  | -0.13 | -0.06 | 1.40E-05 | 0.0049   | 1.40E-07 | 0.044   | NA | NA | NA | NA |
| 0.18 | 0.07  | -0.03 | 0     | 1.40E-05 | 0.013    | 0.067    | 0.83    | NA | NA | NA | NA |
| 0.24 | 0.07  | -0.04 | 0.08  | 1.50E-05 | 0.1      | 0.16     | 0.0022  | NA | NA | NA | NA |
| 0.16 | 0.09  | -0.05 | 0     | 2.30E-05 | 0.0042   | 0.00037  | 0.99    | NA | NA | NA | NA |
| 0.22 | 0.34  | -0.05 | 0.01  | 4.30E-05 | 0.04     | 0.019    | 0.92    | NA | NA | NA | NA |
| 0.14 | 0.03  | -0.05 | -0.04 | 4.40E-05 | 0.59     | 0.0067   | 0.022   | NA | NA | NA | NA |
| 0.83 | 0     | 0.03  | -0.01 | 6.40E-05 | 1        | 0.63     | 0.96    | NA | NA | NA | NA |
| 0.44 | 0.19  | 0.06  | 0.2   | 9.30E-05 | 0.12     | 0.52     | 0.26    | NA | NA | NA | NA |
| -0.3 | -0.26 | -0.01 | -0.03 | 0.00012  | 5.70E-08 | 0.77     | 0.51    | NA | NA | NA | NA |
| 0.23 | 0.13  | -0.08 | -0.04 | 0.00017  | 0.0035   | 2.10E-07 | 0.012   | NA | NA | NA | NA |
| 0.25 | 0.11  | -0.04 | 0.01  | 0.00024  | 0.078    | 0.027    | 0.61    | NA | NA | NA | NA |

|      |       |       |       |         |          |          |          |    |    |    |    |
|------|-------|-------|-------|---------|----------|----------|----------|----|----|----|----|
| 0.52 | 0.47  | 0.19  | 0.22  | 0.00028 | 4.30E-06 | 9.60E-05 | 0.00014  | NA | NA | NA | NA |
| 0.15 | 0.02  | -0.04 | 0.02  | 0.00032 | 0.59     | 0.18     | 0.45     | NA | NA | NA | NA |
| 0.06 | 0.01  | -0.04 | -0.01 | 0.00036 | 0.47     | 0.00035  | 0.44     | NA | NA | NA | NA |
| 0.37 | 0.09  | -0.04 | 0.03  | 0.00054 | 0.19     | 0.18     | 0.42     | NA | NA | NA | NA |
| 0.84 | 0.84  | 0.16  | 0.38  | 0.00056 | 0.38     | 0.092    | 5.10E-05 | NA | NA | NA | NA |
| 0.14 | 0     | -0.04 | 0.05  | 0.00066 | 1        | 0.096    | 0.13     | NA | NA | NA | NA |
| 0.06 | 0.01  | -0.02 | -0.01 | 0.00073 | 0.42     | 0.03     | 0.65     | NA | NA | NA | NA |
| 0.17 | 0.1   | -0.04 | -0.02 | 0.0011  | 0.0095   | 0.078    | 0.47     | NA | NA | NA | NA |
| 0.12 | 0.07  | -0.02 | 0     | 0.0016  | 0.037    | 0.24     | 1        | NA | NA | NA | NA |
| 0.21 | 0.6   | -0.04 | 0     | 0.0017  | 1.70E-06 | 0.058    | 0.98     | NA | NA | NA | NA |
| 0.36 | 0.06  | -0.07 | 0.05  | 0.002   | 0.45     | 0.025    | 0.21     | NA | NA | NA | NA |
| 0.85 | 0.32  | 0     | 0.07  | 0.0022  | 0.00026  | 1        | 0.44     | NA | NA | NA | NA |
| 0.72 | -0.06 | -0.01 | 0     | 0.004   | 0.4      | 0.8      | 1        | NA | NA | NA | NA |
| 0.06 | 0.02  | -0.04 | 0.05  | 0.0041  | 0.3      | 0.005    | 0.00035  | NA | NA | NA | NA |
| 0.14 | -0.01 | -0.04 | 0.01  | 0.0042  | 0.89     | 0.076    | 0.9      | NA | NA | NA | NA |
| 0.26 | -0.07 | -0.02 | 0.03  | 0.0043  | 0.36     | 0.55     | 0.33     | NA | NA | NA | NA |
| 0.16 | 0.13  | 0     | 0.03  | 0.0052  | 0.0012   | 0.98     | 0.027    | NA | NA | NA | NA |
| 0.09 | 0.05  | 0.06  | 0.14  | 0.0058  | 0.053    | 0.015    | 6.90E-05 | NA | NA | NA | NA |
| 0.12 | -0.03 | 0.02  | 0.04  | 0.006   | 0.25     | 0.37     | 0.0084   | NA | NA | NA | NA |
| 0.06 | 0     | -0.06 | 0     | 0.0062  | 0.88     | 4.20E-08 | 0.77     | NA | NA | NA | NA |
| 0.19 | 0.17  | -0.02 | 0.05  | 0.0062  | 0.017    | 0.4      | 0.049    | NA | NA | NA | NA |
| 0.28 | 0.16  | -0.03 | 0.05  | 0.0077  | 0.08     | 0.52     | 0.34     | NA | NA | NA | NA |
| 0.09 | 0.14  | -0.05 | -0.05 | 0.0077  | 0.00013  | 0.0037   | 5.00E-04 | NA | NA | NA | NA |
| 0.73 | -0.14 | 0.01  | 0.13  | 0.0082  | 0.71     | 0.72     | 1.90E-05 | NA | NA | NA | NA |
| 0.14 | 0     | 0.01  | -0.05 | 0.0084  | 1        | 0.9      | 0.074    | NA | NA | NA | NA |
| 0.42 | 0.4   | -0.03 | -0.04 | 0.0091  | 1.30E-07 | 0.16     | 0.11     | NA | NA | NA | NA |
| 0.13 | 0.09  | -0.1  | -0.06 | 0.0098  | 0.052    | 0.0037   | 0.066    | NA | NA | NA | NA |
| 0.22 | 0.16  | -0.02 | 0.17  | 0.0099  | 0.099    | 0.63     | 0.002    | NA | NA | NA | NA |
| 0.06 | 0.06  | -0.04 | 0.01  | 0.01    | 0.001    | 0.0041   | 0.49     | NA | NA | NA | NA |
| 0.09 | 0.03  | -0.03 | 0.04  | 0.011   | 0.31     | 0.095    | 0.069    | NA | NA | NA | NA |

|       |       |       |       |       |          |          |         |    |    |    |    |
|-------|-------|-------|-------|-------|----------|----------|---------|----|----|----|----|
| 0.05  | 0.03  | -0.01 | 0.02  | 0.011 | 0.029    | 0.28     | 0.038   | NA | NA | NA | NA |
| 0.07  | 0     | 0.01  | 0.04  | 0.012 | 1        | 0.51     | 0.011   | NA | NA | NA | NA |
| 0.52  | 0.52  | 0.11  | 0.13  | 0.013 | 0.0063   | 0.41     | 0.46    | NA | NA | NA | NA |
| 0.09  | -0.05 | -0.04 | 0.06  | 0.014 | 0.057    | 0.072    | 0.0063  | NA | NA | NA | NA |
| 0.29  | 0.03  | -0.07 | 0.01  | 0.014 | 0.85     | 0.001    | 0.83    | NA | NA | NA | NA |
| 0.09  | -0.01 | -0.02 | 0.05  | 0.015 | 0.64     | 0.22     | 0.0014  | NA | NA | NA | NA |
| 0.07  | 0.08  | -0.04 | -0.01 | 0.015 | 0.00048  | 0.00041  | 0.43    | NA | NA | NA | NA |
| 0.21  | 0.07  | -0.02 | 0.08  | 0.016 | 0.32     | 0.29     | 0.00058 | NA | NA | NA | NA |
| 0.09  | 0.01  | -0.03 | 0     | 0.017 | 0.67     | 0.24     | 0.98    | NA | NA | NA | NA |
| 0.07  | 0.05  | -0.03 | -0.01 | 0.018 | 0.034    | 0.036    | 0.39    | NA | NA | NA | NA |
| 0.11  | 0.04  | -0.03 | 0.03  | 0.019 | 0.33     | 0.026    | 0.098   | NA | NA | NA | NA |
| 0.1   | 0.06  | -0.01 | 0.05  | 0.02  | 0.038    | 0.5      | 0.022   | NA | NA | NA | NA |
| 0.12  | 0.01  | -0.06 | -0.03 | 0.021 | 0.89     | 0.00099  | 0.11    | NA | NA | NA | NA |
| -0.15 | -0.03 | -0.06 | 0.05  | 0.022 | 0.66     | 0.002    | 0.028   | NA | NA | NA | NA |
| -0.13 | 0.05  | 0.01  | 0.05  | 0.023 | 0.6      | 0.8      | 0.074   | NA | NA | NA | NA |
| 0.11  | 0.19  | -0.01 | 0.03  | 0.023 | 6.90E-05 | 0.65     | 0.17    | NA | NA | NA | NA |
| 0.17  | 0.13  | -0.01 | -0.03 | 0.026 | 0.024    | 0.73     | 0.13    | NA | NA | NA | NA |
| 0.14  | 0     | 0.04  | -0.08 | 0.026 | 1        | 0.58     | 0.049   | NA | NA | NA | NA |
| 0.11  | 0.05  | -0.06 | 0     | 0.026 | 0.1      | 0.00063  | 0.93    | NA | NA | NA | NA |
| 0.08  | -0.03 | -0.02 | 0.01  | 0.028 | 0.18     | 0.2      | 0.42    | NA | NA | NA | NA |
| 0.04  | 0.02  | -0.05 | -0.04 | 0.028 | 0.098    | 7.80E-05 | 0.00011 | NA | NA | NA | NA |
| 0.21  | 0.21  | -0.13 | 0.01  | 0.031 | 0.12     | 0.0015   | 1       | NA | NA | NA | NA |
| 0.11  | 0.05  | -0.01 | -0.01 | 0.031 | 0.29     | 0.8      | 0.69    | NA | NA | NA | NA |
| 0.39  | 0.14  | -0.04 | 0.1   | 0.032 | 0.14     | 0.21     | 0.028   | NA | NA | NA | NA |
| -0.04 | -0.01 | -0.03 | 0.01  | 0.034 | 0.59     | 0.015    | 0.43    | NA | NA | NA | NA |
| 0.17  | 0.15  | -0.03 | 0.04  | 0.035 | 0.0098   | 0.52     | 0.43    | NA | NA | NA | NA |
| -0.43 | -0.05 | 0.1   | 0.2   | 0.036 | 1        | 0.088    | 0.0061  | NA | NA | NA | NA |
| -0.19 | -0.17 | -0.01 | 0.04  | 0.036 | 0.048    | 0.73     | 0.048   | NA | NA | NA | NA |
| 0.11  | 0.06  | 0.01  | -0.01 | 0.037 | 0.055    | 0.61     | 0.5     | NA | NA | NA | NA |
| 0.06  | 0.01  | -0.02 | 0.01  | 0.037 | 0.5      | 0.38     | 0.46    | NA | NA | NA | NA |

|       |       |       |       |       |          |          |          |    |    |    |    |
|-------|-------|-------|-------|-------|----------|----------|----------|----|----|----|----|
| 0.27  | 0.13  | 0.03  | 0.04  | 0.038 | 0.031    | 0.27     | 0.12     | NA | NA | NA | NA |
| 0.08  | 0.18  | -0.09 | -0.11 | 0.038 | 2.80E-06 | 0.0043   | 0.0033   | NA | NA | NA | NA |
| 0.07  | 0.06  | 0     | 0.01  | 0.039 | 0.0041   | 0.95     | 0.55     | NA | NA | NA | NA |
| 0.15  | 0.08  | -0.05 | 0.07  | 0.044 | 0.092    | 0.15     | 0.04     | NA | NA | NA | NA |
| 0.06  | 0.1   | -0.03 | 0.01  | 0.045 | 5.80E-07 | 0.024    | 0.62     | NA | NA | NA | NA |
| -0.05 | -0.05 | -0.05 | -0.07 | 0.045 | 0.089    | 0.006    | 0.00029  | NA | NA | NA | NA |
| -0.48 | -0.18 | -0.14 | -0.03 | 0.046 | 0.52     | 3.30E-06 | 0.47     | NA | NA | NA | NA |
| 0.44  | 0.14  | -0.02 | 0.14  | 0.047 | 0.23     | 0.96     | 0.043    | NA | NA | NA | NA |
| -0.08 | -0.06 | -0.08 | -0.05 | 0.047 | 0.039    | 2.00E-05 | 0.029    | NA | NA | NA | NA |
| -0.03 | -0.01 | 0     | 0.04  | 0.05  | 0.51     | 0.96     | 1.80E-05 | NA | NA | NA | NA |
| -0.33 | -0.07 | 0.06  | 0.04  | 0.071 | 0.97     | 0.15     | 0.17     | NA | NA | NA | NA |
| 0.1   | 0     | -0.03 | -0.01 | 0.072 | 1        | 0.098    | 0.77     | NA | NA | NA | NA |
| 0.1   | 0.2   | -0.06 | 0.04  | 0.072 | 9.10E-05 | 0.04     | 0.3      | NA | NA | NA | NA |
| 0.07  | 0.04  | -0.04 | 0.01  | 0.074 | 0.16     | 0.27     | 0.73     | NA | NA | NA | NA |
| -0.16 | -0.12 | -0.08 | -0.09 | 0.078 | 0.024    | 0.00036  | 0.00023  | NA | NA | NA | NA |
| 0.08  | 0.12  | 0     | 0.04  | 0.079 | 0.004    | 0.92     | 0.13     | NA | NA | NA | NA |
| 0.03  | 0.03  | -0.02 | 0.03  | 0.085 | 0.18     | 0.17     | 0.039    | NA | NA | NA | NA |
| 0.82  | 0.48  | 0.01  | 0.07  | 0.088 | 0.26     | 0.98     | 0.27     | NA | NA | NA | NA |
| 0.08  | 0.08  | -0.06 | -0.05 | 0.09  | 0.23     | 0.016    | 0.013    | NA | NA | NA | NA |
| 0.67  | 0.5   | 0.23  | 0.47  | 0.097 | 0.24     | 0.00086  | 0.01     | NA | NA | NA | NA |
| -0.05 | 0     | -0.04 | 0.05  | 0.1   | 1        | 0.018    | 0.049    | NA | NA | NA | NA |
| 0.15  | 0.07  | -0.11 | 0.05  | 0.1   | 0.4      | 2.00E-05 | 0.13     | NA | NA | NA | NA |
| 0.07  | 0.05  | -0.06 | 0.02  | 0.1   | 0.12     | 5.20E-09 | 0.11     | NA | NA | NA | NA |
| 0.05  | -0.03 | -0.04 | 0.03  | 0.11  | 0.07     | 0.0018   | 0.063    | NA | NA | NA | NA |
| 0.1   | 0.15  | -0.02 | 0.12  | 0.11  | 0.011    | 0.39     | 2.20E-05 | NA | NA | NA | NA |
| 0.17  | 0.13  | -0.05 | -0.03 | 0.11  | 0.028    | 0.022    | 0.3      | NA | NA | NA | NA |
| -0.07 | -0.02 | -0.06 | -0.03 | 0.11  | 0.75     | 0.0038   | 0.23     | NA | NA | NA | NA |
| -0.05 | -0.03 | -0.03 | 0     | 0.12  | 0.43     | 0.035    | 1        | NA | NA | NA | NA |
| 0.31  | -0.01 | -0.01 | 0.07  | 0.12  | 0.85     | 0.35     | 1.40E-05 | NA | NA | NA | NA |
| 0.14  | 0.02  | -0.05 | 0.05  | 0.13  | 0.92     | 0.099    | 0.25     | NA | NA | NA | NA |

|       |       |       |       |      |          |          |          |    |    |    |    |
|-------|-------|-------|-------|------|----------|----------|----------|----|----|----|----|
| 0.12  | -0.03 | -0.04 | 0.02  | 0.13 | 0.69     | 0.13     | 0.46     | NA | NA | NA | NA |
| 0.04  | 0.08  | -0.03 | 0.05  | 0.13 | 0.0036   | 0.1      | 0.0027   | NA | NA | NA | NA |
| 0.5   | 0     | -0.05 | 0.01  | 0.14 | 1        | 0.99     | 1        | NA | NA | NA | NA |
| 0.05  | 0.05  | -0.03 | 0.06  | 0.14 | 0.017    | 0.032    | 3.70E-06 | NA | NA | NA | NA |
| -0.08 | -0.1  | -0.04 | 0.05  | 0.15 | 0.042    | 0.12     | 0.12     | NA | NA | NA | NA |
| 0.11  | 0.01  | -0.06 | -0.03 | 0.15 | 0.89     | 8.00E-04 | 0.2      | NA | NA | NA | NA |
| 0.21  | -0.02 | 0     | 0.08  | 0.15 | 1        | 1        | 1        | NA | NA | NA | NA |
| 0.15  | 0.12  | -0.07 | -0.03 | 0.15 | 0.042    | 0.022    | 0.36     | NA | NA | NA | NA |
| 0.08  | 0     | -0.01 | 0.02  | 0.15 | 1        | 0.58     | 0.46     | NA | NA | NA | NA |
| 0.39  | 0.01  | -0.02 | 0.04  | 0.15 | 1        | 0.6      | 0.26     | NA | NA | NA | NA |
| -0.09 | -0.07 | -0.01 | 0.02  | 0.17 | 0.36     | 0.56     | 0.49     | NA | NA | NA | NA |
| 0.32  | 0.09  | 0.03  | 0     | 0.17 | 0.71     | 0.36     | 1        | NA | NA | NA | NA |
| -0.12 | -0.03 | -0.04 | -0.01 | 0.17 | 0.65     | 0.058    | 0.64     | NA | NA | NA | NA |
| 0.03  | 0.01  | -0.03 | 0     | 0.18 | 0.82     | 0.098    | 1        | NA | NA | NA | NA |
| 0.07  | 0.03  | -0.07 | -0.03 | 0.19 | 0.48     | 2.30E-05 | 0.11     | NA | NA | NA | NA |
| 0.08  | 0     | 0.06  | 0.09  | 0.19 | 1        | 0.15     | 0.017    | NA | NA | NA | NA |
| -0.07 | 0.08  | 0.01  | -0.03 | 0.2  | 0.2      | 0.92     | 0.23     | NA | NA | NA | NA |
| 0.18  | -0.1  | -0.01 | 0.03  | 0.2  | 0.47     | 0.97     | 0.49     | NA | NA | NA | NA |
| 0.05  | 0.16  | -0.03 | -0.01 | 0.21 | 9.10E-05 | 0.049    | 0.57     | NA | NA | NA | NA |
| 0.13  | 0.31  | 0.05  | 0.2   | 0.23 | 5.80E-06 | 0.39     | 0.0068   | NA | NA | NA | NA |
| -0.03 | 0.05  | -0.06 | -0.02 | 0.23 | 0.036    | 3.20E-05 | 0.17     | NA | NA | NA | NA |
| 0.03  | 0.06  | -0.06 | 0     | 0.23 | 0.0086   | 0.0011   | 0.96     | NA | NA | NA | NA |
| 0.5   | NA    | 0.14  | NA    | 0.24 | NA       | 0.45     | NA       | NA | NA | NA | NA |
| -0.1  | -0.12 | -0.06 | -0.03 | 0.24 | 0.088    | 0.0036   | 0.25     | NA | NA | NA | NA |
| 0.06  | 0.15  | -0.02 | 0.1   | 0.24 | 0.00055  | 0.49     | 1.20E-05 | NA | NA | NA | NA |
| -0.23 | 0.03  | -0.04 | 0     | 0.25 | 0.93     | 0.18     | 1        | NA | NA | NA | NA |
| -0.03 | 0     | -0.04 | 0.02  | 0.25 | 1        | 0.16     | 0.59     | NA | NA | NA | NA |
| 0.1   | 0.1   | -0.02 | 0.05  | 0.26 | 0.061    | 0.55     | 0.12     | NA | NA | NA | NA |
| 0.2   | 0.17  | -0.01 | -0.07 | 0.26 | 0.014    | 1        | 0.15     | NA | NA | NA | NA |
| 0.05  | 0.11  | -0.1  | -0.1  | 0.27 | 0.033    | 0.00051  | 7.00E-04 | NA | NA | NA | NA |



|       |       |       |       |      |          |          |          |    |    |    |    |
|-------|-------|-------|-------|------|----------|----------|----------|----|----|----|----|
| 0.09  | 0.04  | -0.06 | 0     | 0.28 | 0.61     | 0.034    | 1        | NA | NA | NA | NA |
| -0.16 | -0.06 | -0.12 | 0.02  | 0.28 | 1        | 0.11     | 0.99     | NA | NA | NA | NA |
| 0.07  | 0.03  | -0.03 | 0.11  | 0.28 | 0.68     | 0.27     | 2.00E-04 | NA | NA | NA | NA |
| -0.08 | 0.01  | 0     | 0.02  | 0.28 | 1        | 0.97     | 0.53     | NA | NA | NA | NA |
| 0.04  | 0.01  | -0.05 | 0.06  | 0.28 | 0.87     | 2.50E-05 | 6.30E-06 | NA | NA | NA | NA |
| -0.07 | 0.07  | -0.07 | -0.02 | 0.28 | 0.11     | 0.0027   | 0.55     | NA | NA | NA | NA |
| -0.05 | -0.02 | -0.06 | 0.02  | 0.29 | 0.48     | 0.0011   | 0.24     | NA | NA | NA | NA |
| 0.17  | 0.13  | -0.08 | 0.03  | 0.29 | 0.00043  | 0.02     | 0.58     | NA | NA | NA | NA |
| 0.04  | 0.15  | 0.03  | 0     | 0.29 | 9.10E-06 | 0.38     | 1        | NA | NA | NA | NA |
| -0.28 | 0.11  | -0.02 | 0.07  | 0.3  | 0.92     | 0.76     | 0.15     | NA | NA | NA | NA |
| 0.06  | 0.01  | -0.04 | 0.04  | 0.3  | 0.75     | 0.18     | 0.33     | NA | NA | NA | NA |
| 0.07  | -0.08 | -0.1  | -0.03 | 0.3  | 0.065    | 2.60E-08 | 0.23     | NA | NA | NA | NA |
| 0.08  | -0.08 | -0.03 | -0.01 | 0.3  | 0.021    | 0.044    | 0.52     | NA | NA | NA | NA |
| -0.06 | -0.01 | -0.01 | 0     | 0.31 | 1        | 0.84     | 1        | NA | NA | NA | NA |
| 0.13  | 0.06  | -0.16 | -0.01 | 0.31 | 0.52     | 2.20E-05 | 0.98     | NA | NA | NA | NA |
| 0.07  | 0.03  | -0.07 | -0.01 | 0.31 | 0.66     | 0.016    | 0.89     | NA | NA | NA | NA |
| -0.05 | -0.07 | -0.02 | -0.05 | 0.31 | 0.15     | 0.59     | 0.024    | NA | NA | NA | NA |
| 0.03  | 0.09  | -0.03 | -0.02 | 0.31 | 0.00099  | 0.15     | 0.34     | NA | NA | NA | NA |
| 0.03  | 0.06  | -0.06 | -0.05 | 0.31 | 0.0065   | 1.00E-04 | 0.0017   | NA | NA | NA | NA |
| 0.02  | 0     | 0.01  | 0     | 0.31 | 0.98     | 0.64     | 0.76     | NA | NA | NA | NA |
| 0.07  | 0     | -0.01 | 0.03  | 0.32 | 1        | 0.5      | 0.17     | NA | NA | NA | NA |
| -0.04 | 0.02  | -0.03 | 0.08  | 0.32 | 0.68     | 0.16     | 0.001    | NA | NA | NA | NA |
| 0.05  | -0.01 | -0.05 | -0.02 | 0.32 | 0.73     | 0.019    | 0.34     | NA | NA | NA | NA |
| 0.25  | 0.25  | 0.12  | 0.28  | 0.32 | 0.87     | 0.48     | 0.31     | NA | NA | NA | NA |
| 0.07  | -0.04 | -0.05 | -0.05 | 0.32 | 0.54     | 0.019    | 0.047    | NA | NA | NA | NA |
| 0.03  | 0.07  | -0.02 | 0.02  | 0.32 | 0.0048   | 0.11     | 0.093    | NA | NA | NA | NA |
| -0.04 | -0.01 | -0.06 | 0.02  | 0.33 | 0.93     | 3.00E-05 | 0.33     | NA | NA | NA | NA |
| 0.21  | 0.08  | 0.21  | 0.29  | 0.34 | 0.65     | 0.0016   | 0.00016  | NA | NA | NA | NA |
| 0.85  | -0.02 | -0.01 | 0.05  | 0.34 | 0.87     | 0.66     | 0.077    | NA | NA | NA | NA |
| 0.06  | 0.01  | -0.06 | 0.08  | 0.35 | 1        | 0.11     | 0.0066   | NA | NA | NA | NA |

|       |       |       |       |      |          |          |          |    |    |    |    |
|-------|-------|-------|-------|------|----------|----------|----------|----|----|----|----|
| 0.11  | -0.22 | 0.12  | 0.33  | 0.35 | 0.14     | 0.22     | 0.31     | NA | NA | NA | NA |
| 0.04  | 0.09  | 0.01  | -0.03 | 0.35 | 0.018    | 0.58     | 0.13     | NA | NA | NA | NA |
| 0.05  | 0.19  | -0.03 | -0.03 | 0.38 | 9.30E-09 | 0.15     | 0.19     | NA | NA | NA | NA |
| -0.02 | 0.09  | 0     | 0.05  | 0.4  | 0.00054  | 0.78     | 5.60E-05 | NA | NA | NA | NA |
| 0.06  | -0.01 | 0.02  | 0.01  | 0.4  | 0.87     | 0.45     | 0.62     | NA | NA | NA | NA |
| -0.02 | 0.06  | -0.05 | -0.03 | 0.41 | 0.022    | 1.40E-05 | 0.033    | NA | NA | NA | NA |
| -0.03 | -0.05 | 0     | -0.02 | 0.42 | 0.14     | 0.9      | 0.42     | NA | NA | NA | NA |
| 0.06  | 0.02  | -0.01 | 0.02  | 0.43 | 0.71     | 0.6      | 0.35     | NA | NA | NA | NA |
| -0.03 | 0.04  | -0.02 | -0.02 | 0.43 | 0.31     | 0.24     | 0.22     | NA | NA | NA | NA |
| 0.07  | 0.07  | -0.05 | 0.04  | 0.43 | 0.46     | 0.27     | 0.43     | NA | NA | NA | NA |
| -0.02 | -0.03 | -0.04 | 0.01  | 0.44 | 0.19     | 0.00031  | 0.71     | NA | NA | NA | NA |
| 0.03  | 0.06  | -0.03 | 0.02  | 0.44 | 0.013    | 0.11     | 0.33     | NA | NA | NA | NA |
| 0.03  | 0.05  | -0.02 | 0.02  | 0.44 | 0.021    | 0.094    | 0.058    | NA | NA | NA | NA |
| 0.13  | 0.04  | -0.05 | 0.09  | 0.45 | 0.45     | 0.03     | 0.00027  | NA | NA | NA | NA |
| -0.02 | 0.03  | -0.05 | 0     | 0.45 | 0.38     | 0.0024   | 0.88     | NA | NA | NA | NA |
| 0.03  | -0.02 | -0.03 | 0.02  | 0.45 | 0.45     | 0.052    | 0.15     | NA | NA | NA | NA |
| 0.06  | 0.19  | 0.02  | 0.06  | 0.46 | 0.019    | 0.59     | 0.009    | NA | NA | NA | NA |
| 0.09  | 0.01  | 0.07  | 0.08  | 0.47 | 0.89     | 0.018    | 0.00028  | NA | NA | NA | NA |
| 0.03  | 0.01  | -0.01 | 0.01  | 0.48 | 0.76     | 0.31     | 0.39     | NA | NA | NA | NA |
| 0.03  | 0.02  | 0     | 0.01  | 0.49 | 0.48     | 1        | 0.38     | NA | NA | NA | NA |
| 0.04  | -0.06 | -0.08 | 0     | 0.49 | 0.046    | 1.90E-06 | 0.86     | NA | NA | NA | NA |
| 0.05  | 0.06  | -0.06 | 0.02  | 0.5  | 0.17     | 0.032    | 0.58     | NA | NA | NA | NA |
| 0.02  | 0.04  | -0.03 | 0.04  | 0.5  | 0.1      | 0.043    | 0.011    | NA | NA | NA | NA |
| 0.04  | -0.03 | 0     | 0.12  | 0.52 | 0.57     | 0.99     | 1.30E-06 | NA | NA | NA | NA |
| -0.04 | 0.07  | -0.03 | 0     | 0.53 | 0.081    | 0.074    | 0.85     | NA | NA | NA | NA |
| 0.39  | 0.05  | -0.06 | 0     | 0.54 | 0.62     | 0.014    | 0.99     | NA | NA | NA | NA |
| -0.03 | 0.1   | -0.07 | 0.01  | 0.55 | 0.066    | 0.003    | 0.82     | NA | NA | NA | NA |
| -0.13 | 0.08  | -0.04 | 0.23  | 0.55 | 0.95     | 0.5      | 0.098    | NA | NA | NA | NA |
| -0.06 | -0.05 | -0.06 | 0.01  | 0.55 | 0.26     | 0.014    | 0.68     | NA | NA | NA | NA |
| 0.02  | 0.07  | -0.04 | -0.02 | 0.56 | 0.00076  | 0.00078  | 0.19     | NA | NA | NA | NA |

|       |       |       |       |      |          |          |          |    |    |    |    |
|-------|-------|-------|-------|------|----------|----------|----------|----|----|----|----|
| 0.03  | 0.16  | -0.04 | 0     | 0.57 | 3.00E-04 | 0.24     | 1        | NA | NA | NA | NA |
| 0.02  | 0.02  | -0.03 | -0.01 | 0.61 | 0.56     | 0.088    | 0.72     | NA | NA | NA | NA |
| -0.13 | 0.16  | 0.04  | 0.15  | 0.64 | 0.083    | 0.19     | 3.20E-05 | NA | NA | NA | NA |
| 0.04  | 0.04  | -0.04 | 0.04  | 0.64 | 0.48     | 0.11     | 0.18     | NA | NA | NA | NA |
| -0.02 | -0.04 | -0.02 | -0.03 | 0.65 | 0.044    | 0.078    | 0.028    | NA | NA | NA | NA |
| 0.06  | 0.05  | -0.05 | -0.01 | 0.65 | 0.37     | 0.042    | 0.77     | NA | NA | NA | NA |
| 0.01  | 0     | -0.06 | 0     | 0.66 | 1        | 0.00042  | 0.89     | NA | NA | NA | NA |
| 0.03  | 0.03  | -0.03 | 0.01  | 0.66 | 0.53     | 0.29     | 0.66     | NA | NA | NA | NA |
| -0.38 | -0.05 | 0.04  | 0.27  | 0.67 | 1        | 0.64     | 0.0017   | NA | NA | NA | NA |
| 0.02  | 0.19  | -0.04 | 0.05  | 0.69 | 7.00E-04 | 0.063    | 0.1      | NA | NA | NA | NA |
| 0.33  | 0.67  | -0.11 | 0.29  | 0.69 | 0.32     | 0.061    | 0.014    | NA | NA | NA | NA |
| 0.01  | 0.11  | -0.05 | -0.01 | 0.71 | 0.002    | 0.023    | 0.55     | NA | NA | NA | NA |
| 0.09  | 0.03  | 0.01  | -0.05 | 0.71 | 1        | 0.82     | 0.031    | NA | NA | NA | NA |
| -0.02 | -0.01 | -0.08 | -0.03 | 0.71 | 0.89     | 9.20E-08 | 0.044    | NA | NA | NA | NA |
| 0.01  | 0.04  | -0.01 | 0     | 0.71 | 0.042    | 0.65     | 1        | NA | NA | NA | NA |
| 0.37  | -0.06 | -0.04 | 0     | 0.71 | 0.92     | 0.24     | 0.99     | NA | NA | NA | NA |
| -0.04 | -0.07 | -0.01 | -0.01 | 0.72 | 0.14     | 0.61     | 0.66     | NA | NA | NA | NA |
| 0.02  | -0.02 | -0.04 | 0.1   | 0.72 | 0.26     | 0.012    | 2.50E-08 | NA | NA | NA | NA |
| -0.04 | 0.74  | -0.09 | 0.06  | 0.72 | 0.61     | 0.00026  | 0.15     | NA | NA | NA | NA |
| -0.05 | -0.13 | -0.03 | 0.05  | 0.72 | 0.55     | 0.23     | 0.071    | NA | NA | NA | NA |
| -0.05 | 0.14  | -0.06 | 0.2   | 0.73 | 0.34     | 0.14     | 0.031    | NA | NA | NA | NA |
| 0.03  | 0.05  | -0.05 | 0.05  | 0.74 | 0.47     | 0.043    | 0.098    | NA | NA | NA | NA |
| -0.04 | -0.13 | -0.09 | 0.01  | 0.74 | 0.043    | 0.03     | 0.89     | NA | NA | NA | NA |
| 0.06  | 0.18  | -0.09 | 0.02  | 0.74 | 0.035    | 0.03     | 0.75     | NA | NA | NA | NA |
| -0.07 | -0.01 | -0.04 | 0.05  | 0.75 | 1        | 0.26     | 0.14     | NA | NA | NA | NA |
| 0.06  | 0     | 0.89  | -0.02 | 0.75 | 1        | 0.22     | 0.72     | NA | NA | NA | NA |
| -0.02 | -0.05 | -0.02 | 0.02  | 0.76 | 0.13     | 0.44     | 0.19     | NA | NA | NA | NA |
| -0.01 | 0.1   | -0.03 | 0     | 0.76 | 0.00082  | 0.16     | 0.9      | NA | NA | NA | NA |
| -0.03 | 0.16  | 0.03  | 0     | 0.77 | 0.0041   | 0.45     | 1        | NA | NA | NA | NA |
| 0.01  | 0.02  | -0.03 | 0.03  | 0.78 | 0.63     | 0.12     | 0.21     | NA | NA | NA | NA |

|       |       |       |       |      |          |          |          |    |    |    |    |
|-------|-------|-------|-------|------|----------|----------|----------|----|----|----|----|
| 0.03  | 0.16  | 0     | 0.01  | 0.78 | 0.09     | 1        | 0.73     | NA | NA | NA | NA |
| 0.07  | -0.03 | -0.09 | NA    | 0.8  | 1        | 0.33     | NA       | NA | NA | NA | NA |
| 0.01  | -0.1  | -0.08 | 0.05  | 0.8  | 0.0056   | 0.00046  | 0.05     | NA | NA | NA | NA |
| -0.05 | -0.09 | 0.04  | 0.03  | 0.81 | 0.11     | 0.23     | 0.62     | NA | NA | NA | NA |
| -0.12 | -0.3  | -0.04 | 0.1   | 0.83 | 0.15     | 0.27     | 0.025    | NA | NA | NA | NA |
| 0.01  | 0.05  | 0     | 0.01  | 0.83 | 0.13     | 0.87     | 0.77     | NA | NA | NA | NA |
| -0.02 | -0.02 | -0.08 | -0.08 | 0.83 | 0.9      | 0.00051  | 0.0046   | NA | NA | NA | NA |
| 0.09  | 0.07  | 0.06  | 0.12  | 0.83 | 0.9      | 0.23     | 0.0011   | NA | NA | NA | NA |
| -0.01 | -0.04 | -0.02 | 0     | 0.86 | 0.36     | 0.25     | 0.92     | NA | NA | NA | NA |
| -0.04 | -0.04 | -0.07 | 0.01  | 0.86 | 0.88     | 0.00012  | 0.56     | NA | NA | NA | NA |
| 0.04  | 0.09  | -0.04 | 0.01  | 0.87 | 0.088    | 0.042    | 0.81     | NA | NA | NA | NA |
| 0.01  | 0.13  | -0.03 | -0.04 | 0.88 | 2.60E-05 | 0.015    | 0.0043   | NA | NA | NA | NA |
| 0.03  | -0.03 | -0.04 | -0.03 | 0.88 | 0.88     | 0.37     | 0.52     | NA | NA | NA | NA |
| 0.04  | 0     | -0.05 | 0.06  | 0.9  | 1        | 0.21     | 0.14     | NA | NA | NA | NA |
| 0.03  | 0.07  | -0.03 | 0.01  | 0.9  | 0.23     | 0.35     | 0.84     | NA | NA | NA | NA |
| 0.01  | 0.12  | -0.04 | 0.08  | 0.91 | 0.00048  | 0.0015   | 8.70E-06 | NA | NA | NA | NA |
| 0.01  | 0.01  | -0.02 | 0     | 0.91 | 0.63     | 0.088    | 0.84     | NA | NA | NA | NA |
| 0.04  | 0.01  | -0.06 | -0.02 | 0.95 | 1        | 0.00034  | 0.48     | NA | NA | NA | NA |
| 0     | 0.09  | -0.04 | 0.04  | 0.95 | 0.00023  | 0.00023  | 0.00068  | NA | NA | NA | NA |
| 0.03  | 0.32  | -0.09 | -0.07 | 0.96 | 2.00E-07 | 0.00068  | 0.016    | NA | NA | NA | NA |
| 0.01  | 0     | -0.05 | -0.02 | 0.97 | 1        | 0.022    | 0.29     | NA | NA | NA | NA |
| 0.01  | 0.01  | -0.04 | 0     | 0.97 | 0.62     | 0.016    | 0.95     | NA | NA | NA | NA |
| 0     | 0.14  | -0.01 | 0     | 0.97 | 5.60E-05 | 0.64     | 0.93     | NA | NA | NA | NA |
| 0     | 0.08  | -0.1  | -0.04 | 0.97 | 0.0024   | 9.30E-08 | 0.071    | NA | NA | NA | NA |
| 0.01  | -0.02 | -0.06 | -0.01 | 0.98 | 0.21     | 0.00029  | 0.59     | NA | NA | NA | NA |
| -0.05 | 0.39  | -0.09 | 0.18  | 0.98 | 0.092    | 0.011    | 0.036    | NA | NA | NA | NA |
| -0.02 | 0.04  | -0.25 | -0.15 | 1    | 0.97     | 0.0013   | 0.1      | NA | NA | NA | NA |
| 0     | -0.01 | -0.03 | 0.08  | 1    | 0.78     | 0.011    | 8.00E-08 | NA | NA | NA | NA |
| 0     | 0.08  | -0.02 | -0.02 | 1    | 3.70E-05 | 0.16     | 0.29     | NA | NA | NA | NA |
| 0     | 0.02  | -0.04 | 0.08  | 1    | 0.34     | 0.046    | 0.00078  | NA | NA | NA | NA |

|       |       |       |       |   |          |          |          |    |    |    |    |
|-------|-------|-------|-------|---|----------|----------|----------|----|----|----|----|
| 0.02  | 0     | -0.07 | 0.13  | 1 | 1        | 0.048    | 0.0055   | NA | NA | NA | NA |
| 0.02  | 0.12  | -0.03 | 0.01  | 1 | 0.54     | 0.78     | 1        | NA | NA | NA | NA |
| 0     | -0.01 | -0.05 | 0.01  | 1 | 1        | 0.068    | 0.87     | NA | NA | NA | NA |
| -0.01 | 0.03  | -0.06 | -0.02 | 1 | 0.43     | 0.0021   | 0.38     | NA | NA | NA | NA |
| 0     | 0.03  | -0.02 | 0.07  | 1 | 0.25     | 0.26     | 1.90E-05 | NA | NA | NA | NA |
| -0.02 | -0.11 | -0.1  | -0.02 | 1 | 0.003    | 3.00E-04 | 0.6      | NA | NA | NA | NA |
| 0.01  | -0.03 | -0.09 | -0.01 | 1 | 0.62     | 0.0012   | 0.82     | NA | NA | NA | NA |
| -0.03 | -0.45 | -0.03 | 0.03  | 1 | 0.013    | 0.18     | 0.44     | NA | NA | NA | NA |
| 0.12  | -0.04 | -0.03 | 0.05  | 1 | 0.61     | 0.31     | 0.2      | NA | NA | NA | NA |
| 0     | 0.63  | -0.06 | 0.01  | 1 | 1.10E-09 | 0.00025  | 0.87     | NA | NA | NA | NA |
| -0.01 | -0.01 | -0.09 | -0.02 | 1 | 1        | 0.0061   | 0.69     | NA | NA | NA | NA |
| 0     | -0.08 | -0.01 | 0.02  | 1 | 0.15     | 0.92     | 0.6      | NA | NA | NA | NA |
| 0.17  | 0.17  | 0.3   | NA    | 1 | 1        | 0.17     | NA       | NA | NA | NA | NA |
| 0     | 0.11  | -0.02 | 0.03  | 1 | 2.60E-07 | 0.27     | 0.11     | NA | NA | NA | NA |
| -0.01 | 0.01  | -0.05 | -0.12 | 1 | 0.93     | 0.31     | 7.30E-05 | NA | NA | NA | NA |
| -0.03 | 0.13  | -0.04 | 0.05  | 1 | 0.013    | 0.029    | 0.079    | NA | NA | NA | NA |
| 0     | -0.01 | -0.01 | -0.01 | 1 | 0.62     | 0.54     | 0.51     | NA | NA | NA | NA |
| -0.02 | -0.05 | 0.04  | 0.13  | 1 | 0.59     | 0.25     | 0.0099   | NA | NA | NA | NA |
| 0     | -0.02 | -0.02 | -0.09 | 1 | 0.78     | 0.51     | 0.0021   | NA | NA | NA | NA |
| 0     | 0.02  | -0.05 | -0.04 | 1 | 0.41     | 0.012    | 0.091    | NA | NA | NA | NA |
| 0     | 0     | -0.06 | 0.02  | 1 | 1        | 0.0043   | 0.52     | NA | NA | NA | NA |
| -0.03 | 0.15  | 0.05  | 0     | 1 | 0.48     | 0.42     | 1        | NA | NA | NA | NA |
| -0.09 | 0.2   | -0.04 | 0.05  | 1 | 0.81     | 0.68     | 0.6      | NA | NA | NA | NA |
| -0.02 | 0.12  | -0.08 | -0.07 | 1 | 0.39     | 0.0039   | 0.022    | NA | NA | NA | NA |
| 0     | 0     | -0.04 | 0.02  | 1 | 1        | 0.015    | 0.36     | NA | NA | NA | NA |
| 0     | 0.07  | -0.03 | 0.03  | 1 | 0.0034   | 0.061    | 0.096    | NA | NA | NA | NA |
| 0     | -0.01 | -0.06 | 0     | 1 | 0.96     | 0.0011   | 1        | NA | NA | NA | NA |
| -0.03 | -0.04 | -0.17 | -0.2  | 1 | 0.82     | 0.017    | 0.00013  | NA | NA | NA | NA |
| 0     | -0.01 | 0.01  | 0.04  | 1 | 0.6      | 0.48     | 0.033    | NA | NA | NA | NA |
| 0.01  | 0.14  | -0.08 | 0.03  | 1 | 0.63     | 0.0061   | 0.48     | NA | NA | NA | NA |



|       |       |       |       |          |          |          |          |    |    |    |    |
|-------|-------|-------|-------|----------|----------|----------|----------|----|----|----|----|
| NA    | NA    | 0.08  | -0.12 | NA       | NA       | 0.55     | 0.39     | NA | NA | NA | NA |
| NA    | NA    | -0.05 | 0.31  | NA       | NA       | 1        | 0.36     | NA | NA | NA | NA |
| NA    | -0.13 | -0.09 | -0.1  | NA       | 1        | 0.038    | 0.0048   | NA | NA | NA | NA |
| NA    | -0.88 | -0.08 | -0.04 | NA       | 0.047    | 0.69     | 1        | NA | NA | NA | NA |
| NA    | 0.79  | -0.07 | 0.2   | NA       | 0.024    | 0.48     | 0.21     | NA | NA | NA | NA |
| NA    | 0     | 0.04  | 0.64  | NA       | 1        | 1        | 0.29     | NA | NA | NA | NA |
| NA    | NA    | NA    | NA    | NA       | NA       | NA       | NA       | NA | NA | NA | NA |
| NA    | 0.06  | -0.04 | 0.02  | NA       | 0.19     | 0.13     | 0.47     | NA | NA | NA | NA |
| NA    | NA    | 0.1   | 0.27  | NA       | NA       | 0.39     | 5.30E-05 | NA | NA | NA | NA |
| NA    | NA    | 0.03  | -0.01 | NA       | NA       | 0.33     | 0.95     | NA | NA | NA | NA |
| NA    | NA    | -0.29 | 0.5   | NA       | NA       | 0.97     | 0.82     | NA | NA | NA | NA |
| NA    | NA    | 0.06  | NA    | NA       | NA       | 0.85     | NA       | NA | NA | NA | NA |
| NA    | -0.12 | -0.02 | 0.03  | NA       | 0.24     | 0.76     | 0.54     | NA | NA | NA | NA |
| NA    | NA    | NA    | NA    | NA       | NA       | NA       | NA       | NA | NA | NA | NA |
| NA    | NA    | -0.27 | 0.15  | NA       | NA       | 1.70E-05 | 0.048    | NA | NA | NA | NA |
| NA    | NA    | -0.09 | 0.06  | NA       | NA       | 0.04     | 0.61     | NA | NA | NA | NA |
| NA    | -0.13 | -0.06 | 0     | NA       | 0.5      | 0.096    | 1        | NA | NA | NA | NA |
| NA    | NA    | -0.02 | 0.09  | NA       | NA       | 1        | 0.58     | NA | NA | NA | NA |
| NA    | 0.16  | 0.03  | 0.15  | NA       | 0.67     | 0.71     | 0.016    | NA | NA | NA | NA |
| NA    | 0.02  | 0.04  | -0.02 | NA       | 1        | 0.56     | 0.86     | NA | NA | NA | NA |
| NA    | NA    | -0.08 | NA    | NA       | NA       | 0.62     | NA       | NA | NA | NA | NA |
| NA    | 0.18  | -0.08 | 0     | NA       | 2.00E-06 | 0.00018  | 1        | NA | NA | NA | NA |
| NA    | NA    | -0.05 | -0.01 | NA       | NA       | 0.59     | 1        | NA | NA | NA | NA |
| NA    | 0.05  | -0.06 | 0.06  | NA       | 1        | 0.31     | 0.37     | NA | NA | NA | NA |
| NA    | NA    | 0.09  | 0.89  | NA       | NA       | 1        | 0.43     | NA | NA | NA | NA |
| -0.19 | 0.08  | -0.07 | -0.01 | 1.00E-09 | 0.13     | 0.00019  | 0.67     | NA | NA | NA | NA |
| 0.16  | 0.06  | -0.02 | 0.07  | 4.90E-09 | 0.00031  | 0.39     | 0.002    | NA | NA | NA | NA |
| 0.31  | 0.07  | -0.1  | -0.02 | 8.80E-08 | 0.24     | 0.00015  | 0.3      | NA | NA | NA | NA |
| 0.37  | 0.08  | -0.07 | 0     | 4.50E-07 | 0.088    | 6.60E-06 | 0.95     | NA | NA | NA | NA |
| -0.32 | -0.04 | -0.07 | 0.27  | 5.20E-07 | 0.79     | 0.3      | 8.80E-06 | NA | NA | NA | NA |

|       |       |       |       |          |          |          |          |    |    |    |    |
|-------|-------|-------|-------|----------|----------|----------|----------|----|----|----|----|
| 0.46  | -0.04 | -0.05 | 0.05  | 8.30E-07 | 0.9      | 0.043    | 0.19     | NA | NA | NA | NA |
| 0.13  | 0     | -0.04 | 0     | 1.10E-06 | 0.84     | 6.40E-05 | 0.96     | NA | NA | NA | NA |
| 0.16  | 0.06  | 0     | 0.04  | 1.30E-06 | 0.017    | 0.96     | 0.014    | NA | NA | NA | NA |
| 0.12  | 0.1   | -0.07 | -0.05 | 2.10E-06 | 9.20E-05 | 0.00018  | 0.03     | NA | NA | NA | NA |
| 0.15  | 0.02  | -0.06 | -0.04 | 2.40E-06 | 0.43     | 2.00E-04 | 0.0093   | NA | NA | NA | NA |
| 0.41  | 0.03  | -0.23 | -0.15 | 3.30E-06 | 0.82     | 6.20E-08 | 0.00037  | NA | NA | NA | NA |
| 0.27  | 0.13  | -0.05 | 0.12  | 4.20E-06 | 0.0055   | 0.0038   | 7.40E-06 | NA | NA | NA | NA |
| 0.4   | 0.23  | -0.16 | -0.05 | 4.60E-06 | 0.00081  | 1.70E-07 | 0.22     | NA | NA | NA | NA |
| 0.14  | 0.1   | -0.04 | 0.02  | 5.00E-06 | 0.00033  | 0.017    | 0.25     | NA | NA | NA | NA |
| 0.22  | 0.15  | 0.02  | 0     | 5.60E-06 | 1.70E-05 | 0.49     | 0.9      | NA | NA | NA | NA |
| 0.13  | 0.03  | -0.03 | -0.03 | 6.30E-06 | 0.16     | 0.075    | 0.1      | NA | NA | NA | NA |
| -0.26 | -0.24 | -0.39 | -0.11 | 1.20E-05 | 0.15     | 2.80E-09 | 0.054    | NA | NA | NA | NA |
| 0.07  | 0.03  | -0.02 | 0.01  | 1.30E-05 | 0.0065   | 0.012    | 0.23     | NA | NA | NA | NA |
| 0.26  | 0.06  | -0.1  | -0.07 | 2.30E-05 | 0.09     | 9.00E-07 | 0.0036   | NA | NA | NA | NA |
| 0.33  | 0.28  | -0.03 | 0.02  | 2.30E-05 | 6.40E-07 | 0.34     | 0.5      | NA | NA | NA | NA |
| 0.13  | 0.18  | -0.01 | 0.04  | 2.30E-05 | 3.50E-07 | 0.67     | 0.15     | NA | NA | NA | NA |
| 0.16  | 0.09  | -0.06 | -0.06 | 3.30E-05 | 0.0089   | 0.0023   | 0.00059  | NA | NA | NA | NA |
| 0.25  | 0.16  | -0.08 | 0.01  | 3.60E-05 | 4.80E-08 | 3.10E-06 | 0.81     | NA | NA | NA | NA |
| -0.21 | -0.15 | 0     | 0.12  | 4.20E-05 | 0.25     | 0.93     | 0.00013  | NA | NA | NA | NA |
| 0.43  | 0.02  | -0.04 | 0.03  | 4.20E-05 | 1        | 0.032    | 0.3      | NA | NA | NA | NA |
| 0.36  | 0.01  | -0.05 | 0.05  | 6.40E-05 | 1        | 0.089    | 0.17     | NA | NA | NA | NA |
| 0.2   | 0.27  | -0.05 | 0.02  | 6.60E-05 | 1.60E-07 | 0.015    | 0.33     | NA | NA | NA | NA |
| 0.23  | 0.06  | -0.01 | 0.03  | 0.00014  | 0.18     | 0.84     | 0.54     | NA | NA | NA | NA |
| 0.1   | 0.07  | -0.06 | -0.06 | 0.00014  | 0.00013  | 0.00029  | 0.00038  | NA | NA | NA | NA |
| -0.31 | -0.25 | -0.02 | 0.08  | 0.00021  | 0.35     | 0.42     | 0.019    | NA | NA | NA | NA |
| -0.13 | -0.12 | -0.06 | -0.03 | 0.00028  | 0.0051   | 0.0032   | 0.23     | NA | NA | NA | NA |
| 0.15  | 0     | -0.02 | -0.01 | 0.00032  | 0.99     | 0.24     | 0.38     | NA | NA | NA | NA |
| 0.25  | 0.05  | -0.03 | 0.04  | 0.00044  | 0.28     | 0.22     | 0.12     | NA | NA | NA | NA |
| -0.23 | 0.19  | -0.19 | -0.11 | 0.00064  | 0.074    | 2.40E-08 | 0.0028   | NA | NA | NA | NA |
| 0.13  | 0.12  | -0.06 | -0.01 | 0.00066  | 1.30E-06 | 1.00E-04 | 0.52     | NA | NA | NA | NA |



|       |       |       |       |         |          |          |         |    |    |    |    |
|-------|-------|-------|-------|---------|----------|----------|---------|----|----|----|----|
| 0.06  | 0.04  | -0.03 | -0.02 | 0.00074 | 0.0057   | 0.0042   | 0.049   | NA | NA | NA | NA |
| -0.45 | -0.47 | -0.02 | 0.02  | 0.00076 | 0.00028  | 0.37     | 0.54    | NA | NA | NA | NA |
| 0.51  | 0.08  | -0.02 | 0.04  | 0.00079 | 0.19     | 0.7      | 0.36    | NA | NA | NA | NA |
| -0.1  | 0     | -0.04 | 0.06  | 0.0013  | 1        | 0.0046   | 0.0064  | NA | NA | NA | NA |
| -0.36 | -0.37 | -0.02 | 0     | 0.0013  | 0.00026  | 0.3      | 0.95    | NA | NA | NA | NA |
| 0.08  | 0.03  | -0.01 | -0.01 | 0.0015  | 0.15     | 0.43     | 0.51    | NA | NA | NA | NA |
| 0.21  | 0.07  | -0.04 | -0.01 | 0.0017  | 0.025    | 0.059    | 0.84    | NA | NA | NA | NA |
| 0.1   | 0.02  | -0.03 | 0.02  | 0.0017  | 0.29     | 0.004    | 0.034   | NA | NA | NA | NA |
| 0.26  | 0.27  | -0.08 | 0     | 0.0021  | 0.00028  | 0.0036   | 0.97    | NA | NA | NA | NA |
| -0.1  | -0.06 | -0.07 | -0.04 | 0.0022  | 0.11     | 2.10E-06 | 0.0088  | NA | NA | NA | NA |
| 0.07  | 0.03  | 0.02  | 0.03  | 0.0025  | 0.09     | 0.19     | 0.02    | NA | NA | NA | NA |
| 0.14  | 0.04  | -0.08 | 0.06  | 0.0028  | 0.18     | 1.20E-07 | 0.0017  | NA | NA | NA | NA |
| 0.34  | 0.05  | -0.11 | -0.1  | 0.0029  | 0.094    | 1.50E-06 | 0.00019 | NA | NA | NA | NA |
| 0.21  | 0.21  | -0.09 | 0     | 0.0031  | 0.001    | 0.001    | 0.94    | NA | NA | NA | NA |
| 0.09  | 0.08  | -0.05 | -0.02 | 0.0032  | 0.00038  | 0.00013  | 0.21    | NA | NA | NA | NA |
| 0.06  | 0.01  | -0.02 | 0     | 0.0032  | 0.65     | 0.043    | 0.7     | NA | NA | NA | NA |
| 0.39  | 0.31  | -0.03 | 0.02  | 0.0034  | 3.20E-07 | 0.16     | 0.53    | NA | NA | NA | NA |
| 0.05  | 0.02  | -0.05 | 0.02  | 0.0044  | 0.12     | 6.60E-07 | 0.26    | NA | NA | NA | NA |
| 0.22  | -0.03 | 0     | 0.02  | 0.0046  | 0.42     | 0.88     | 0.52    | NA | NA | NA | NA |
| 0.15  | -0.02 | -0.03 | 0.05  | 0.0047  | 0.64     | 0.082    | 0.0035  | NA | NA | NA | NA |
| 0.11  | 0.01  | -0.12 | -0.04 | 0.0048  | 0.91     | 3.20E-06 | 0.16    | NA | NA | NA | NA |
| -0.06 | 0.02  | -0.04 | -0.02 | 0.0051  | 0.48     | 0.002    | 0.26    | NA | NA | NA | NA |
| 0.08  | 0.06  | -0.02 | 0.01  | 0.0051  | 0.0048   | 0.044    | 0.57    | NA | NA | NA | NA |
| 0.15  | 0.1   | -0.04 | -0.03 | 0.0052  | 0.12     | 0.039    | 0.29    | NA | NA | NA | NA |
| 0.17  | 0.03  | 0     | 0.05  | 0.0056  | 0.7      | 0.97     | 0.036   | NA | NA | NA | NA |
| 0.88  | 0.88  | -0.1  | -0.07 | 0.0057  | 0.33     | 0.23     | 0.57    | NA | NA | NA | NA |
| 0.69  | 0.17  | -0.09 | 0.03  | 0.0057  | 0.54     | 0.044    | 0.71    | NA | NA | NA | NA |
| 0.16  | 0.15  | -0.1  | 0     | 0.0059  | 0.0023   | 0.0041   | 1       | NA | NA | NA | NA |
| 0.11  | 0.14  | -0.07 | -0.04 | 0.0061  | 2.40E-05 | 0.00094  | 0.087   | NA | NA | NA | NA |
| 0.13  | 0.05  | -0.05 | -0.04 | 0.0062  | 0.27     | 0.058    | 0.12    | NA | NA | NA | NA |

|       |       |       |       |        |          |          |          |    |    |    |    |
|-------|-------|-------|-------|--------|----------|----------|----------|----|----|----|----|
| 0.12  | 0.03  | -0.01 | 0.07  | 0.0063 | 0.35     | 0.47     | 9.50E-06 | NA | NA | NA | NA |
| 0.1   | -0.03 | -0.08 | -0.02 | 0.0065 | 0.36     | 1.20E-05 | 0.31     | NA | NA | NA | NA |
| 0.32  | -0.17 | 0.14  | 0.18  | 0.0066 | 0.12     | 0.17     | 0.018    | NA | NA | NA | NA |
| 0.06  | 0.13  | -0.05 | -0.01 | 0.0067 | 1.90E-08 | 9.40E-08 | 0.27     | NA | NA | NA | NA |
| 0.06  | 0.07  | -0.05 | 0.02  | 0.0073 | 0.00026  | 0.0015   | 0.33     | NA | NA | NA | NA |
| 0.08  | 0.14  | -0.03 | 0     | 0.008  | 3.40E-06 | 0.038    | 0.84     | NA | NA | NA | NA |
| -0.41 | -0.14 | NA    | NA    | 0.0086 | 0.37     | NA       | NA       | NA | NA | NA | NA |
| 0.16  | 0.04  | 0     | 0.15  | 0.009  | 0.57     | 1        | 2.00E-07 | NA | NA | NA | NA |
| 0.08  | 0.06  | -0.05 | -0.03 | 0.0091 | 0.013    | 0.0024   | 0.1      | NA | NA | NA | NA |
| 0.1   | 0.11  | -0.03 | 0.06  | 0.01   | 0.005    | 0.089    | 0.0046   | NA | NA | NA | NA |
| 0.12  | 0.03  | -0.03 | 0.04  | 0.012  | 0.43     | 0.17     | 0.049    | NA | NA | NA | NA |
| 0.34  | 0.23  | 0.04  | 0.1   | 0.012  | 0.014    | 0.15     | 0.00078  | NA | NA | NA | NA |
| 0.09  | 0     | -0.02 | -0.02 | 0.014  | 1        | 0.59     | 0.47     | NA | NA | NA | NA |
| -0.08 | -0.1  | -0.03 | 0.01  | 0.014  | 4.00E-05 | 0.018    | 0.65     | NA | NA | NA | NA |
| -0.23 | -0.22 | -0.09 | 0.02  | 0.017  | 0.01     | 0.073    | 0.83     | NA | NA | NA | NA |
| 0.25  | 0.03  | -0.06 | -0.07 | 0.018  | 0.75     | 0.016    | 0.0072   | NA | NA | NA | NA |
| 0.12  | -0.03 | -0.05 | -0.02 | 0.018  | 0.21     | 2.10E-05 | 0.086    | NA | NA | NA | NA |
| 0.06  | 0.01  | 0.01  | 0.01  | 0.018  | 0.8      | 0.62     | 0.41     | NA | NA | NA | NA |
| -0.11 | -0.06 | -0.11 | -0.14 | 0.018  | 0.25     | 0.0024   | 6.80E-06 | NA | NA | NA | NA |
| 0.39  | 0.02  | -0.07 | 0.3   | 0.021  | 1        | 0.36     | 0.0066   | NA | NA | NA | NA |
| 0.06  | -0.02 | -0.03 | 0.03  | 0.022  | 0.32     | 0.0088   | 0.027    | NA | NA | NA | NA |
| 0.12  | 0.19  | -0.03 | 0.05  | 0.023  | 0.00023  | 0.64     | 0.4      | NA | NA | NA | NA |
| -0.19 | -0.08 | -0.01 | 0.07  | 0.023  | 0.4      | 0.87     | 0.036    | NA | NA | NA | NA |
| 0.06  | 0.09  | -0.08 | 0.03  | 0.023  | 0.00019  | 1.80E-07 | 0.21     | NA | NA | NA | NA |
| 0.2   | 0.11  | -0.01 | 0.15  | 0.023  | 0.31     | 0.66     | 3.70E-05 | NA | NA | NA | NA |
| 0.1   | 0.08  | -0.08 | 0.01  | 0.024  | 0.003    | 0.0015   | 0.64     | NA | NA | NA | NA |
| 0.07  | 0.26  | -0.04 | 0.05  | 0.025  | 5.00E-07 | 0.015    | 0.0088   | NA | NA | NA | NA |
| -0.2  | 0.25  | -0.07 | -0.05 | 0.026  | 0.011    | 0.011    | 0.067    | NA | NA | NA | NA |
| 0.15  | 0.01  | -0.07 | 0.01  | 0.026  | 0.83     | 0.00035  | 0.78     | NA | NA | NA | NA |
| -0.07 | 0.03  | -0.08 | -0.05 | 0.028  | 0.56     | 0.00031  | 0.032    | NA | NA | NA | NA |

|       |       |       |       |       |          |          |          |    |    |    |    |
|-------|-------|-------|-------|-------|----------|----------|----------|----|----|----|----|
| 0.08  | 0.01  | -0.06 | 0.03  | 0.032 | 0.95     | 0.0023   | 0.28     | NA | NA | NA | NA |
| 0.28  | 0.08  | -0.06 | 0.01  | 0.033 | 0.42     | 0.018    | 0.89     | NA | NA | NA | NA |
| -0.57 | -0.3  | 0     | 0.08  | 0.038 | 0.71     | 1        | 0.029    | NA | NA | NA | NA |
| 0.09  | 0.14  | -0.06 | 0.03  | 0.038 | 0.00039  | 0.00097  | 0.34     | NA | NA | NA | NA |
| 0.13  | 0.03  | 0.01  | 0.03  | 0.038 | 0.87     | 0.78     | 0.31     | NA | NA | NA | NA |
| 0.05  | 0.04  | -0.07 | -0.07 | 0.041 | 0.12     | 0.00015  | 3.60E-06 | NA | NA | NA | NA |
| 0.56  | 0.17  | -0.02 | 0.05  | 0.042 | 0.0029   | 0.32     | 0.049    | NA | NA | NA | NA |
| -0.09 | -0.1  | -0.04 | -0.02 | 0.043 | 0.0046   | 0.011    | 0.24     | NA | NA | NA | NA |
| 0.29  | -0.04 | -0.04 | -0.04 | 0.044 | 0.73     | 0.11     | 0.085    | NA | NA | NA | NA |
| 0.1   | 0.18  | -0.02 | -0.02 | 0.046 | 0.00069  | 0.6      | 0.55     | NA | NA | NA | NA |
| 0.38  | 0.04  | -0.03 | -0.05 | 0.047 | 0.65     | 0.43     | 0.17     | NA | NA | NA | NA |
| 0.04  | 0.07  | -0.02 | 0.01  | 0.047 | 0.0029   | 0.061    | 0.27     | NA | NA | NA | NA |
| 0.09  | 0.11  | -0.09 | 0.03  | 0.051 | 0.013    | 2.00E-05 | 0.31     | NA | NA | NA | NA |
| 0.05  | 0.06  | -0.03 | 0.02  | 0.053 | 0.0043   | 0.043    | 0.28     | NA | NA | NA | NA |
| 0.1   | 0.01  | -0.07 | 0.04  | 0.055 | 0.93     | 0.0011   | 0.086    | NA | NA | NA | NA |
| 0.16  | 0.46  | -0.01 | 0.16  | 0.058 | 0.011    | 0.75     | 0.023    | NA | NA | NA | NA |
| 0.06  | 0.12  | -0.01 | 0.04  | 0.061 | 5.80E-05 | 0.68     | 0.0061   | NA | NA | NA | NA |
| 0.03  | 0.02  | -0.04 | 0.01  | 0.063 | 0.18     | 1.20E-05 | 0.55     | NA | NA | NA | NA |
| 0.37  | -0.1  | 0.07  | 0.14  | 0.065 | 0.31     | 0.0026   | 3.70E-07 | NA | NA | NA | NA |
| 0.07  | 0.08  | -0.04 | 0.01  | 0.065 | 0.0013   | 0.00083  | 0.33     | NA | NA | NA | NA |
| 0.11  | 0.02  | -0.02 | 0.01  | 0.067 | 0.69     | 0.19     | 0.59     | NA | NA | NA | NA |
| -0.11 | 0.14  | 0.06  | -0.02 | 0.068 | 0.13     | 0.19     | 0.7      | NA | NA | NA | NA |
| 0.03  | -0.01 | -0.05 | -0.03 | 0.068 | 0.71     | 0.00018  | 0.03     | NA | NA | NA | NA |
| -0.09 | -0.09 | -0.04 | 0.09  | 0.068 | 0.02     | 0.047    | 6.00E-05 | NA | NA | NA | NA |
| -0.08 | 0.05  | -0.02 | 0     | 0.072 | 0.32     | 0.12     | 0.8      | NA | NA | NA | NA |
| 0.16  | 0.11  | 0     | -0.04 | 0.077 | 1        | 0.96     | 0.14     | NA | NA | NA | NA |
| 0.12  | 0.04  | -0.02 | -0.01 | 0.078 | 0.55     | 0.52     | 0.68     | NA | NA | NA | NA |
| 0.09  | 0.08  | -0.07 | -0.04 | 0.079 | 0.2      | 0.0044   | 0.092    | NA | NA | NA | NA |
| 0.12  | 0.04  | -0.08 | -0.05 | 0.081 | 0.4      | 0.00014  | 0.018    | NA | NA | NA | NA |
| -0.11 | -0.09 | -0.03 | 0     | 0.081 | 0.0033   | 0.046    | 0.86     | NA | NA | NA | NA |

|       |       |       |       |       |          |          |         |    |    |    |    |
|-------|-------|-------|-------|-------|----------|----------|---------|----|----|----|----|
| 0.06  | 0.03  | -0.06 | 0.01  | 0.082 | 0.45     | 0.0012   | 0.82    | NA | NA | NA | NA |
| 0.13  | -0.09 | -0.06 | 0.02  | 0.087 | 0.064    | 0.0081   | 0.39    | NA | NA | NA | NA |
| 0.12  | 0.37  | -0.04 | 0.01  | 0.088 | 4.40E-08 | 0.21     | 0.79    | NA | NA | NA | NA |
| 0.07  | -0.03 | -0.03 | 0.02  | 0.09  | 0.39     | 0.042    | 0.24    | NA | NA | NA | NA |
| 0.27  | 0.03  | -0.02 | 0.02  | 0.092 | 0.71     | 0.57     | 0.53    | NA | NA | NA | NA |
| 0.1   | 0.02  | 0     | 0.01  | 0.097 | 0.86     | 1        | 0.62    | NA | NA | NA | NA |
| 0.26  | 0.21  | -0.02 | 0.02  | 0.099 | 0.00018  | 0.32     | 0.24    | NA | NA | NA | NA |
| 0.77  | -0.1  | -0.11 | -0.01 | 0.11  | 0.31     | 0.00016  | 0.95    | NA | NA | NA | NA |
| -0.12 | 0.17  | -0.04 | 0.05  | 0.11  | 0.074    | 0.18     | 0.14    | NA | NA | NA | NA |
| 0.42  | 0.14  | -0.17 | 0.07  | 0.13  | 0.8      | 0.22     | 0.8     | NA | NA | NA | NA |
| 0.07  | 0.03  | -0.06 | -0.01 | 0.13  | 0.49     | 0.0089   | 0.76    | NA | NA | NA | NA |
| 0.17  | -0.14 | -0.02 | 0.01  | 0.13  | 0.05     | 0.66     | 0.87    | NA | NA | NA | NA |
| -0.06 | 0.05  | -0.04 | 0.02  | 0.13  | 0.32     | 0.053    | 0.44    | NA | NA | NA | NA |
| -0.36 | -0.43 | -0.02 | 0.09  | 0.13  | 0.001    | 1        | 0.41    | NA | NA | NA | NA |
| 0.06  | 0.02  | -0.06 | -0.03 | 0.13  | 0.43     | 0.0018   | 0.12    | NA | NA | NA | NA |
| 0.1   | 0.32  | -0.08 | -0.01 | 0.14  | 2.70E-05 | 0.008    | 0.69    | NA | NA | NA | NA |
| 0.22  | -0.04 | -0.03 | -0.03 | 0.14  | 0.51     | 0.25     | 0.4     | NA | NA | NA | NA |
| 0.09  | 0.03  | -0.04 | 0     | 0.14  | 0.55     | 0.038    | 0.99    | NA | NA | NA | NA |
| 0.1   | 0.1   | -0.07 | -0.06 | 0.15  | 0.023    | 0.0015   | 0.029   | NA | NA | NA | NA |
| 0.19  | 0.15  | -0.01 | -0.03 | 0.15  | 0.5      | 0.74     | 0.44    | NA | NA | NA | NA |
| 0.06  | 0.11  | -0.03 | 0.03  | 0.15  | 0.011    | 0.063    | 0.24    | NA | NA | NA | NA |
| 0.08  | -0.01 | -0.02 | 0.09  | 0.16  | 1        | 0.32     | 0.00015 | NA | NA | NA | NA |
| -0.13 | -0.15 | -0.08 | -0.02 | 0.16  | 0.031    | 0.00043  | 0.41    | NA | NA | NA | NA |
| 0.07  | 0.01  | -0.02 | 0     | 0.16  | 0.82     | 0.12     | 0.8     | NA | NA | NA | NA |
| -0.05 | 0.07  | -0.04 | 0.03  | 0.17  | 0.25     | 0.087    | 0.18    | NA | NA | NA | NA |
| 0.05  | 0.15  | -0.07 | 0.02  | 0.17  | 5.70E-06 | 1.70E-06 | 0.38    | NA | NA | NA | NA |
| -0.04 | 0.01  | -0.04 | 0.02  | 0.17  | 0.75     | 0.00025  | 0.099   | NA | NA | NA | NA |
| -0.13 | 0.17  | -0.02 | 0.03  | 0.18  | 0.15     | 0.47     | 0.52    | NA | NA | NA | NA |
| 0.28  | 0.19  | -0.02 | 0.02  | 0.18  | 0.069    | 0.57     | 0.57    | NA | NA | NA | NA |
| 0.07  | 0.2   | -0.01 | 0.01  | 0.18  | 1.50E-05 | 0.6      | 0.73    | NA | NA | NA | NA |

|       |       |       |       |      |          |          |          |    |    |    |    |
|-------|-------|-------|-------|------|----------|----------|----------|----|----|----|----|
| 0.21  | 0.06  | 0.03  | 0.04  | 0.19 | 0.44     | 0.41     | 0.27     | NA | NA | NA | NA |
| 0.04  | 0.06  | -0.06 | -0.03 | 0.19 | 0.042    | 0.00028  | 0.12     | NA | NA | NA | NA |
| -0.1  | 0.22  | -0.06 | -0.04 | 0.19 | 0.0032   | 0.042    | 0.15     | NA | NA | NA | NA |
| 0.04  | 0.02  | -0.03 | -0.03 | 0.19 | 0.68     | 0.12     | 0.15     | NA | NA | NA | NA |
| 0.04  | 0.02  | 0     | -0.04 | 0.2  | 0.42     | 0.96     | 0.052    | NA | NA | NA | NA |
| 0.92  | 0.02  | -0.06 | -0.01 | 0.21 | 1        | 0.47     | 0.93     | NA | NA | NA | NA |
| -0.06 | 0.04  | -0.03 | -0.02 | 0.21 | 0.11     | 0.37     | 0.72     | NA | NA | NA | NA |
| 0.03  | 0.09  | 0     | 0.03  | 0.21 | 5.40E-05 | 0.89     | 0.14     | NA | NA | NA | NA |
| 0.07  | 0.19  | -0.01 | 0.05  | 0.21 | 6.40E-07 | 0.5      | 0.027    | NA | NA | NA | NA |
| -0.19 | -0.17 | -0.04 | -0.05 | 0.21 | 0.0011   | 0.17     | 0.091    | NA | NA | NA | NA |
| 0.23  | 0.18  | 0.08  | -0.03 | 0.21 | 0.39     | 0.19     | 0.73     | NA | NA | NA | NA |
| -0.24 | -0.19 | -0.1  | -0.09 | 0.22 | 0.069    | 0.006    | 0.028    | NA | NA | NA | NA |
| 0.89  | -0.04 | -0.09 | 0.1   | 0.22 | 0.97     | 0.00081  | 0.047    | NA | NA | NA | NA |
| 0.03  | 0.03  | -0.03 | 0.01  | 0.23 | 0.11     | 0.026    | 0.67     | NA | NA | NA | NA |
| 0.1   | 0.02  | 0.03  | 0.04  | 0.23 | 0.83     | 0.14     | 0.0079   | NA | NA | NA | NA |
| 0.06  | 0.05  | -0.04 | -0.01 | 0.23 | 0.036    | 0.005    | 0.78     | NA | NA | NA | NA |
| 0.04  | 0.08  | -0.02 | 0.03  | 0.23 | 0.017    | 0.18     | 0.085    | NA | NA | NA | NA |
| 0.02  | 0.06  | 0.02  | 0.06  | 0.23 | 1.00E-04 | 0.074    | 1.00E-06 | NA | NA | NA | NA |
| -0.11 | -0.14 | -0.02 | 0     | 0.23 | 0.042    | 0.62     | 1        | NA | NA | NA | NA |
| 0.02  | 0.04  | -0.03 | 0.03  | 0.24 | 0.02     | 0.012    | 0.0077   | NA | NA | NA | NA |
| 0.05  | 0.02  | -0.01 | 0.04  | 0.25 | 0.48     | 0.48     | 0.0076   | NA | NA | NA | NA |
| 0.03  | 0.01  | -0.06 | -0.01 | 0.26 | 0.66     | 4.20E-06 | 0.77     | NA | NA | NA | NA |
| 0.28  | 0.42  | -0.02 | 0     | 0.26 | 0.077    | 0.82     | 0.95     | NA | NA | NA | NA |
| 0.05  | 0.01  | 0.01  | 0.05  | 0.26 | 0.99     | 0.65     | 0.013    | NA | NA | NA | NA |
| 0.03  | 0.18  | -0.08 | -0.07 | 0.26 | 2.60E-07 | 0.00038  | 0.0032   | NA | NA | NA | NA |
| 0.04  | 0.02  | -0.06 | -0.01 | 0.26 | 0.35     | 5.50E-05 | 0.69     | NA | NA | NA | NA |
| 0.06  | 0.15  | -0.02 | -0.03 | 0.27 | 0.0053   | 0.41     | 0.43     | NA | NA | NA | NA |
| 0.05  | 0.11  | -0.03 | 0.01  | 0.27 | 0.00051  | 0.28     | 0.69     | NA | NA | NA | NA |
| 0.26  | NA    | 0.05  | 0.17  | 0.28 | NA       | 0.3      | 8.00E-06 | NA | NA | NA | NA |
| 0.07  | 0.03  | -0.03 | 0.05  | 0.28 | 0.65     | 0.48     | 0.16     | NA | NA | NA | NA |

|       |       |       |       |      |          |          |          |    |    |    |    |
|-------|-------|-------|-------|------|----------|----------|----------|----|----|----|----|
| 0.06  | 0.13  | 0     | 0.05  | 0.29 | 0.037    | 0.95     | 0.025    | NA | NA | NA | NA |
| 0.11  | 0.08  | 0.01  | 0.09  | 0.3  | 0.19     | 0.88     | 0.0017   | NA | NA | NA | NA |
| 0.12  | -0.01 | -0.04 | 0.15  | 0.31 | 1        | 0.42     | 0.0034   | NA | NA | NA | NA |
| 0.04  | 0.06  | -0.07 | 0.03  | 0.31 | 0.042    | 1.40E-05 | 0.26     | NA | NA | NA | NA |
| 0.44  | -0.17 | -0.06 | -0.05 | 0.31 | 0.22     | 0.092    | 0.19     | NA | NA | NA | NA |
| -0.03 | -0.07 | -0.01 | 0.05  | 0.32 | 0.0011   | 0.42     | 2.70E-05 | NA | NA | NA | NA |
| 0.03  | 0.06  | -0.07 | -0.04 | 0.32 | 0.0086   | 2.00E-04 | 0.01     | NA | NA | NA | NA |
| -0.03 | 0.01  | -0.05 | -0.05 | 0.32 | 0.75     | 0.23     | 0.18     | NA | NA | NA | NA |
| 0.04  | 0     | -0.01 | 0.03  | 0.33 | 1        | 0.81     | 0.23     | NA | NA | NA | NA |
| -0.06 | -0.01 | -0.05 | -0.02 | 0.35 | 0.97     | 0.003    | 0.33     | NA | NA | NA | NA |
| 0.85  | 0.56  | -0.02 | 0.15  | 0.35 | 0.0016   | 0.83     | 0.0036   | NA | NA | NA | NA |
| -0.09 | 0.01  | 0.02  | 0     | 0.35 | 1        | 0.51     | 0.99     | NA | NA | NA | NA |
| 0.04  | -0.01 | -0.03 | 0.01  | 0.35 | 0.62     | 0.028    | 0.58     | NA | NA | NA | NA |
| -0.02 | 0.01  | -0.06 | 0.02  | 0.36 | 0.64     | 0.00035  | 0.6      | NA | NA | NA | NA |
| 0.02  | 0.01  | -0.03 | -0.01 | 0.38 | 0.77     | 0.02     | 0.31     | NA | NA | NA | NA |
| 0.08  | -0.02 | -0.02 | -0.04 | 0.38 | 0.73     | 0.61     | 0.1      | NA | NA | NA | NA |
| -0.21 | NA    | -0.09 | -0.09 | 0.38 | NA       | 0.21     | 0.16     | NA | NA | NA | NA |
| 0.03  | -0.03 | -0.04 | 0.03  | 0.39 | 0.32     | 0.034    | 0.21     | NA | NA | NA | NA |
| 0.13  | 0     | -0.06 | 0.07  | 0.39 | 1        | 0.00026  | 0.00037  | NA | NA | NA | NA |
| -0.06 | -0.01 | -0.06 | 0.02  | 0.41 | 1        | 0.018    | 0.62     | NA | NA | NA | NA |
| 0.19  | 0.02  | -0.02 | 0.02  | 0.41 | 1        | 0.38     | 0.48     | NA | NA | NA | NA |
| -0.07 | -0.13 | -0.05 | 0     | 0.41 | 0.0063   | 0.11     | 1        | NA | NA | NA | NA |
| 0.05  | -0.03 | -0.02 | 0.03  | 0.41 | 0.34     | 0.1      | 0.13     | NA | NA | NA | NA |
| 0.04  | 0.09  | -0.03 | 0.03  | 0.42 | 0.027    | 0.025    | 0.044    | NA | NA | NA | NA |
| 0.02  | 0.1   | -0.04 | 0.02  | 0.42 | 0.00012  | 0.00057  | 0.083    | NA | NA | NA | NA |
| 0.03  | 0     | 0.03  | 0.05  | 0.43 | 1        | 0.062    | 0.00046  | NA | NA | NA | NA |
| -0.08 | -0.23 | -0.06 | -0.05 | 0.43 | 5.20E-06 | 0.00036  | 0.0018   | NA | NA | NA | NA |
| -0.08 | 0.58  | 0.03  | 0.16  | 0.44 | 4.30E-09 | 0.2      | 1.50E-08 | NA | NA | NA | NA |
| -0.07 | 0     | 0.09  | 0.17  | 0.44 | 1        | 0.0071   | 0.00022  | NA | NA | NA | NA |
| 0.41  | 0.02  | 0.05  | 0.03  | 0.45 | 0.84     | 0.096    | 0.19     | NA | NA | NA | NA |

|       |       |       |       |      |          |          |          |    |    |    |    |
|-------|-------|-------|-------|------|----------|----------|----------|----|----|----|----|
| -0.06 | 0.04  | 0.02  | 0.12  | 0.46 | 0.53     | 0.33     | 3.80E-07 | NA | NA | NA | NA |
| 0.08  | -0.07 | -0.06 | -0.04 | 0.46 | 0.29     | 0.23     | 0.4      | NA | NA | NA | NA |
| 0.03  | 0.15  | -0.03 | 0.01  | 0.47 | 4.10E-07 | 0.018    | 0.32     | NA | NA | NA | NA |
| 0.1   | -0.05 | 0     | 0.07  | 0.47 | 0.32     | 0.95     | 0.00056  | NA | NA | NA | NA |
| 0.82  | 0.04  | 0.17  | 0.14  | 0.48 | 0.92     | 0.045    | 0.0078   | NA | NA | NA | NA |
| -0.2  | -0.23 | 0     | 0.11  | 0.49 | 0.24     | 1        | 0.011    | NA | NA | NA | NA |
| 0.06  | 0.03  | -0.07 | -0.01 | 0.5  | 1        | 0.035    | 1        | NA | NA | NA | NA |
| -0.02 | 0.03  | -0.01 | -0.01 | 0.51 | 0.28     | 0.73     | 0.64     | NA | NA | NA | NA |
| -0.02 | 0.03  | -0.04 | 0.01  | 0.51 | 0.17     | 0.001    | 0.69     | NA | NA | NA | NA |
| 0.02  | 0.07  | -0.07 | -0.05 | 0.51 | 0.017    | 2.90E-06 | 0.00028  | NA | NA | NA | NA |
| -0.05 | -0.08 | -0.06 | 0.03  | 0.52 | 0.19     | 1.00E-04 | 0.16     | NA | NA | NA | NA |
| 0.19  | -0.05 | -0.01 | 0     | 0.52 | 0.44     | 0.82     | 0.96     | NA | NA | NA | NA |
| -0.03 | 0.01  | -0.05 | 0.01  | 0.52 | 0.68     | 2.40E-05 | 0.47     | NA | NA | NA | NA |
| 0.02  | -0.01 | -0.01 | 0.04  | 0.53 | 0.79     | 0.78     | 0.024    | NA | NA | NA | NA |
| 0.06  | 0.17  | -0.02 | 0.06  | 0.54 | 7.10E-05 | 0.29     | 0.043    | NA | NA | NA | NA |
| 0.09  | -0.13 | -0.01 | 0.12  | 0.54 | 0.012    | 0.64     | 1.60E-08 | NA | NA | NA | NA |
| 0.02  | 0.26  | -0.06 | 0.01  | 0.54 | 1.60E-05 | 0.00013  | 0.73     | NA | NA | NA | NA |
| -0.06 | -0.06 | -0.1  | -0.16 | 0.55 | 0.44     | 0.059    | 0.011    | NA | NA | NA | NA |
| 0.03  | 0.09  | -0.04 | 0.05  | 0.56 | 0.15     | 0.25     | 0.11     | NA | NA | NA | NA |
| 0.03  | 0     | -0.02 | 0.03  | 0.57 | 1        | 0.39     | 0.15     | NA | NA | NA | NA |
| 0.06  | -0.05 | -0.06 | 0.02  | 0.57 | 0.54     | 0.025    | 0.52     | NA | NA | NA | NA |
| 0.07  | -0.02 | -0.02 | -0.01 | 0.58 | 0.99     | 0.62     | 0.84     | NA | NA | NA | NA |
| 0.02  | -0.04 | -0.05 | -0.02 | 0.59 | 0.064    | 3.00E-05 | 0.088    | NA | NA | NA | NA |
| 0.04  | 0.22  | 0     | 0.04  | 0.59 | 0.00055  | 1        | 0.36     | NA | NA | NA | NA |
| 0.02  | 0.06  | -0.03 | 0.06  | 0.6  | 0.062    | 0.042    | 0.0025   | NA | NA | NA | NA |
| 0.07  | 0.15  | 0     | -0.01 | 0.61 | 0.00087  | 1        | 0.77     | NA | NA | NA | NA |
| 0.05  | -0.01 | -0.03 | 0     | 0.61 | 0.76     | 0.18     | 1        | NA | NA | NA | NA |
| 0.02  | 0.15  | -0.02 | 0.01  | 0.61 | 2.40E-06 | 0.32     | 0.7      | NA | NA | NA | NA |
| -0.04 | -0.04 | -0.02 | 0.08  | 0.61 | 0.35     | 0.26     | 3.80E-05 | NA | NA | NA | NA |
| -0.03 | 0.09  | 0.04  | 0.03  | 0.61 | 0.058    | 0.077    | 0.23     | NA | NA | NA | NA |

|       |       |       |       |      |          |          |          |    |    |    |    |
|-------|-------|-------|-------|------|----------|----------|----------|----|----|----|----|
| -0.1  | -0.4  | 0.04  | -0.01 | 0.61 | 0.0067   | 0.21     | 0.92     | NA | NA | NA | NA |
| -0.12 | 0.24  | -0.02 | 0     | 0.62 | 0.28     | 0.6      | 1        | NA | NA | NA | NA |
| 0.02  | 0.06  | -0.03 | -0.01 | 0.62 | 0.012    | 0.15     | 0.6      | NA | NA | NA | NA |
| 0.02  | 0.04  | -0.07 | -0.02 | 0.64 | 0.28     | 0.0021   | 0.45     | NA | NA | NA | NA |
| 0.03  | 0.03  | -0.05 | 0.03  | 0.65 | 0.35     | 0.0079   | 0.064    | NA | NA | NA | NA |
| 0.04  | 0.92  | -0.02 | 0.13  | 0.65 | 0.15     | 0.58     | 0.00059  | NA | NA | NA | NA |
| -0.03 | -0.04 | -0.05 | 0     | 0.66 | 0.52     | 0.026    | 0.99     | NA | NA | NA | NA |
| -0.04 | 0     | -0.04 | -0.06 | 0.66 | 1        | 0.094    | 0.0094   | NA | NA | NA | NA |
| -0.03 | -0.06 | -0.02 | 0.03  | 0.66 | 0.16     | 0.36     | 0.17     | NA | NA | NA | NA |
| 0.02  | 0.01  | -0.11 | -0.09 | 0.66 | 0.67     | 0.00026  | 0.00019  | NA | NA | NA | NA |
| 0.04  | -0.08 | -0.04 | 0.03  | 0.68 | 0.027    | 0.026    | 0.2      | NA | NA | NA | NA |
| -0.01 | 0.02  | -0.02 | 0.06  | 0.68 | 0.55     | 0.18     | 9.90E-05 | NA | NA | NA | NA |
| -0.02 | -0.02 | -0.01 | 0.04  | 0.69 | 0.52     | 0.82     | 0.091    | NA | NA | NA | NA |
| 0.05  | 0.1   | 0     | 0.04  | 0.69 | 0.32     | 0.95     | 0.31     | NA | NA | NA | NA |
| -0.04 | -0.01 | -0.04 | 0     | 0.69 | 1        | 0.13     | 1        | NA | NA | NA | NA |
| 0.03  | 0.05  | -0.02 | 0.02  | 0.69 | 0.0087   | 0.39     | 0.31     | NA | NA | NA | NA |
| -0.03 | -0.05 | -0.1  | -0.09 | 0.71 | 0.19     | 0.00036  | 0.0039   | NA | NA | NA | NA |
| 0.05  | 0.15  | 0.04  | 0.06  | 0.71 | 7.20E-05 | 0.052    | 0.0073   | NA | NA | NA | NA |
| 0.02  | 0.18  | -0.11 | -0.07 | 0.71 | 8.20E-05 | 4.80E-09 | 0.0027   | NA | NA | NA | NA |
| 0.02  | 0.02  | -0.03 | 0.03  | 0.71 | 0.51     | 0.034    | 0.018    | NA | NA | NA | NA |
| -0.02 | 0     | -0.06 | 0.04  | 0.71 | 1        | 2.90E-05 | 0.027    | NA | NA | NA | NA |
| -0.09 | 0.36  | 0     | 0.05  | 0.72 | 0.0019   | 1        | 0.25     | NA | NA | NA | NA |
| -0.12 | -0.12 | -0.1  | -0.05 | 0.72 | 0.44     | 3.50E-05 | 0.085    | NA | NA | NA | NA |
| -0.03 | -0.07 | 0     | 0.01  | 0.72 | 0.13     | 0.92     | 0.81     | NA | NA | NA | NA |
| 0.01  | 0.01  | -0.03 | 0.04  | 0.73 | 0.62     | 0.031    | 0.0057   | NA | NA | NA | NA |
| 0.01  | 0.04  | -0.03 | 0.01  | 0.73 | 0.09     | 0.021    | 0.59     | NA | NA | NA | NA |
| 0.01  | -0.01 | -0.02 | 0.01  | 0.73 | 0.66     | 0.18     | 0.53     | NA | NA | NA | NA |
| -0.02 | 0     | -0.02 | 0     | 0.75 | 0.92     | 0.2      | 1        | NA | NA | NA | NA |
| -0.03 | -0.05 | -0.03 | 0.03  | 0.76 | 0.3      | 0.059    | 0.23     | NA | NA | NA | NA |
| -0.01 | 0.07  | 0.04  | 0.03  | 0.76 | 0.0098   | 0.023    | 0.088    | NA | NA | NA | NA |



|       |       |       |       |      |          |         |          |    |    |    |    |
|-------|-------|-------|-------|------|----------|---------|----------|----|----|----|----|
| 0.05  | -0.04 | -0.06 | 0.08  | 0.77 | 0.77     | 0.047   | 0.045    | NA | NA | NA | NA |
| 0.05  | 0.05  | -0.02 | 0.03  | 0.77 | 0.22     | 0.37    | 0.15     | NA | NA | NA | NA |
| -0.11 | -0.28 | -0.03 | 0.01  | 0.78 | 0.11     | 0.32    | 0.7      | NA | NA | NA | NA |
| 0.02  | 0     | -0.05 | 0     | 0.78 | 1        | 0.00072 | 0.99     | NA | NA | NA | NA |
| -0.02 | 0     | 0.01  | 0.03  | 0.78 | 1        | 0.74    | 0.15     | NA | NA | NA | NA |
| 0.06  | 0     | 0.03  | 0.11  | 0.78 | 1        | 0.2     | 3.70E-06 | NA | NA | NA | NA |
| -0.01 | 0.05  | -0.03 | 0.04  | 0.79 | 0.18     | 0.06    | 0.0062   | NA | NA | NA | NA |
| 0.01  | -0.01 | -0.04 | 0.02  | 0.8  | 0.83     | 0.19    | 0.35     | NA | NA | NA | NA |
| 0.01  | -0.06 | -0.06 | -0.03 | 0.8  | 0.098    | 0.014   | 0.15     | NA | NA | NA | NA |
| -0.05 | 0.39  | -0.02 | 0.23  | 0.81 | 0.00018  | 0.47    | 2.80E-07 | NA | NA | NA | NA |
| 0.26  | 0.59  | -0.07 | 0.27  | 0.82 | 0.0086   | 0.088   | 0.032    | NA | NA | NA | NA |
| 0.03  | 0.02  | 0.08  | 0.16  | 0.82 | 0.91     | 0.0053  | 5.30E-06 | NA | NA | NA | NA |
| -0.09 | 0.04  | 0     | 0.01  | 0.85 | 0.99     | 1       | 0.84     | NA | NA | NA | NA |
| 0     | 0     | -0.03 | 0.01  | 0.85 | 0.98     | 0.00052 | 0.66     | NA | NA | NA | NA |
| 0.01  | 0.07  | -0.04 | 0.02  | 0.87 | 0.011    | 0.0035  | 0.32     | NA | NA | NA | NA |
| -0.01 | -0.07 | -0.02 | -0.05 | 0.87 | 0.14     | 0.46    | 0.021    | NA | NA | NA | NA |
| 0.02  | 0.02  | -0.03 | 0.02  | 0.88 | 0.54     | 0.086   | 0.33     | NA | NA | NA | NA |
| 0.02  | 0.39  | -0.06 | -0.01 | 0.9  | 2.00E-06 | 0.03    | 0.71     | NA | NA | NA | NA |
| -0.02 | 0.1   | 0     | 0.06  | 0.91 | 0.17     | 1       | 0.012    | NA | NA | NA | NA |
| 0.04  | 0.02  | -0.05 | 0.1   | 0.93 | 1        | 0.14    | 0.067    | NA | NA | NA | NA |
| -0.04 | -0.23 | -0.07 | -0.14 | 0.93 | 0.0037   | 0.025   | 0.024    | NA | NA | NA | NA |
| 0.11  | 0.15  | 0.06  | 0.05  | 0.94 | 0.015    | 0.3     | 0.16     | NA | NA | NA | NA |
| -0.01 | -0.2  | -0.04 | -0.03 | 0.94 | 2.20E-07 | 0.052   | 0.17     | NA | NA | NA | NA |
| 0.04  | -0.05 | -0.09 | -0.08 | 0.95 | 0.45     | 0.023   | 0.011    | NA | NA | NA | NA |
| -0.03 | 0.01  | -0.01 | 0.02  | 0.95 | 0.92     | 0.39    | 0.22     | NA | NA | NA | NA |
| -0.02 | -0.01 | -0.07 | 0.15  | 0.96 | 0.97     | 0.00019 | 1.40E-07 | NA | NA | NA | NA |
| 0.01  | 0     | -0.03 | 0.02  | 0.96 | 1        | 0.03    | 0.32     | NA | NA | NA | NA |
| 0.02  | 0.19  | -0.04 | 0.02  | 0.98 | 0.00027  | 0.16    | 0.5      | NA | NA | NA | NA |
| 0     | 0.08  | -0.02 | 0.01  | 0.98 | 0.0072   | 0.15    | 0.4      | NA | NA | NA | NA |
| 0.01  | 0.11  | -0.06 | -0.04 | 0.98 | 0.0047   | 0.0013  | 0.02     | NA | NA | NA | NA |

|       |       |       |       |      |        |          |          |    |    |    |    |
|-------|-------|-------|-------|------|--------|----------|----------|----|----|----|----|
| 0.03  | 0.05  | 0.01  | 0.05  | 0.98 | 0.34   | 0.74     | 0.056    | NA | NA | NA | NA |
| 0.02  | 0.05  | -0.08 | -0.06 | 0.99 | 0.4    | 4.70E-06 | 0.00088  | NA | NA | NA | NA |
| 0     | 0.02  | -0.04 | -0.04 | 0.99 | 0.69   | 0.046    | 0.097    | NA | NA | NA | NA |
| 0     | 0.02  | -0.05 | 0.02  | 1    | 0.32   | 0.005    | 0.48     | NA | NA | NA | NA |
| -0.02 | 0.26  | -0.03 | 0.07  | 1    | 0.03   | 0.18     | 0.016    | NA | NA | NA | NA |
| -0.02 | 0.26  | -0.01 | 0.06  | 1    | 0.001  | 0.87     | 0.15     | NA | NA | NA | NA |
| -0.01 | 0.19  | 0.05  | 0.12  | 1    | 0.19   | 0.023    | 8.30E-05 | NA | NA | NA | NA |
| 0     | 0.02  | -0.04 | 0.01  | 1    | 0.66   | 0.1      | 0.74     | NA | NA | NA | NA |
| 0.02  | 0.42  | 0.01  | 0.05  | 1    | 0.092  | 1        | 0.36     | NA | NA | NA | NA |
| 0     | NA    | -0.01 | 0.05  | 1    | NA     | 0.77     | 0.15     | NA | NA | NA | NA |
| -0.4  | -0.67 | -0.02 | 0.15  | 1    | 0.88   | 0.74     | 0.57     | NA | NA | NA | NA |
| -0.01 | 0.72  | -0.03 | -0.02 | 1    | 0.052  | 0.54     | 0.67     | NA | NA | NA | NA |
| 0     | -0.5  | -0.08 | -0.13 | 1    | 0.45   | 0.86     | 0.46     | NA | NA | NA | NA |
| 0     | 0.08  | -0.02 | -0.02 | 1    | 0.014  | 0.39     | 0.2      | NA | NA | NA | NA |
| -0.01 | 0     | 0.05  | 0.03  | 1    | 1      | 0.33     | 0.68     | NA | NA | NA | NA |
| 0     | 0.26  | -0.08 | 0.04  | 1    | 0.0013 | 0.00023  | 0.12     | NA | NA | NA | NA |
| 0.18  | 0.25  | -0.04 | -0.05 | 1    | 1      | 0.23     | 1        | NA | NA | NA | NA |
| -0.08 | -0.15 | 0     | 0.04  | 1    | 0.13   | 1        | 0.21     | NA | NA | NA | NA |
| -0.02 | 0     | -0.12 | 0.06  | 1    | 1      | 0.0024   | 1        | NA | NA | NA | NA |
| -0.01 | 0.05  | -0.01 | 0.02  | 1    | 0.73   | 0.8      | 0.46     | NA | NA | NA | NA |
| 0.02  | 0.05  | -0.01 | 0.03  | 1    | 0.31   | 0.68     | 0.1      | NA | NA | NA | NA |
| 0.19  | 0.36  | -0.18 | 0.32  | 1    | 0.12   | 0.014    | 0.0084   | NA | NA | NA | NA |
| 0.09  | -0.03 | -0.07 | -0.08 | 1    | 1      | 0.44     | 0.59     | NA | NA | NA | NA |
| 0     | 0     | -0.06 | 0     | 1    | 1      | 0.00023  | 0.98     | NA | NA | NA | NA |
| -0.01 | 0.14  | -0.07 | 0.02  | 1    | 0.28   | 0.06     | 0.68     | NA | NA | NA | NA |
| 0     | 0.01  | 0     | 0     | 1    | 0.85   | 1        | 1        | NA | NA | NA | NA |
| 0     | -0.07 | -0.03 | 0.06  | 1    | 0.17   | 0.089    | 0.0064   | NA | NA | NA | NA |
| 0     | -0.01 | 0     | 0.03  | 1    | 0.69   | 0.94     | 0.086    | NA | NA | NA | NA |
| -0.02 | 0.87  | 0.07  | 0.01  | 1    | 0.028  | 0.29     | 1        | NA | NA | NA | NA |
| 0.02  | 0.36  | -0.03 | -0.01 | 1    | 0.13   | 0.45     | 0.86     | NA | NA | NA | NA |

|       |       |       |       |   |          |          |          |    |    |    |    |
|-------|-------|-------|-------|---|----------|----------|----------|----|----|----|----|
| 0.01  | -0.04 | 0.03  | 0.1   | 1 | 0.24     | 0.16     | 2.50E-07 | NA | NA | NA | NA |
| 0     | 0.04  | -0.05 | 0.01  | 1 | 0.28     | 0.00018  | 0.72     | NA | NA | NA | NA |
| 0     | 0.05  | -0.06 | 0.02  | 1 | 0.018    | 0.0053   | 0.51     | NA | NA | NA | NA |
| 0     | -0.07 | -0.1  | 0.02  | 1 | 0.79     | 0.058    | 1        | NA | NA | NA | NA |
| 0.02  | 0.19  | -0.04 | 0     | 1 | 0.088    | 0.12     | 1        | NA | NA | NA | NA |
| 0.07  | 0.02  | -0.17 | -0.02 | 1 | 1        | 2.20E-06 | 0.71     | NA | NA | NA | NA |
| 0     | 0.03  | -0.05 | -0.01 | 1 | 0.83     | 0.075    | 0.79     | NA | NA | NA | NA |
| 0     | 0.03  | -0.04 | 0.03  | 1 | 0.068    | 6.00E-05 | 0.015    | NA | NA | NA | NA |
| 0     | -0.01 | -0.05 | 0     | 1 | 0.69     | 3.00E-05 | 0.82     | NA | NA | NA | NA |
| 0     | -0.03 | 0.01  | 0.16  | 1 | 1        | 0.93     | 4.50E-05 | NA | NA | NA | NA |
| -0.01 | 0.1   | -0.08 | 0.09  | 1 | 0.12     | 2.10E-05 | 0.00019  | NA | NA | NA | NA |
| 0     | 0.05  | -0.05 | 0     | 1 | 0.85     | 0.075    | 1        | NA | NA | NA | NA |
| 0.02  | 0.02  | -0.17 | 0.15  | 1 | 1        | 2.30E-05 | 0.084    | NA | NA | NA | NA |
| 0     | 0     | -0.03 | -0.01 | 1 | 1        | 0.15     | 0.71     | NA | NA | NA | NA |
| 0     | -0.01 | -0.04 | -0.01 | 1 | 1        | 0.12     | 0.79     | NA | NA | NA | NA |
| 0.05  | 0.08  | 0.01  | 0.08  | 1 | 1        | 0.81     | 0.0016   | NA | NA | NA | NA |
| 0.02  | 0.07  | -0.02 | 0.08  | 1 | 0.23     | 0.66     | 0.044    | NA | NA | NA | NA |
| 0     | 0.05  | -0.03 | 0.02  | 1 | 0.0042   | 0.027    | 0.22     | NA | NA | NA | NA |
| 0     | -0.02 | -0.04 | 0.02  | 1 | 0.43     | 0.00022  | 0.21     | NA | NA | NA | NA |
| 0.05  | 0.91  | 0.03  | -0.06 | 1 | 1.90E-05 | 0.46     | 0.14     | NA | NA | NA | NA |
| 0.04  | 0     | 0.05  | 0.06  | 1 | 1        | 0.38     | 0.23     | NA | NA | NA | NA |
| -0.04 | 0.15  | -0.06 | 0.01  | 1 | 0.15     | 0.022    | 0.91     | NA | NA | NA | NA |
| 0     | 0.03  | -0.02 | 0.04  | 1 | 0.4      | 0.23     | 0.02     | NA | NA | NA | NA |
| 0.04  | 0.11  | -0.05 | -0.06 | 1 | 0.31     | 0.37     | 0.48     | NA | NA | NA | NA |
| -0.24 | -0.25 | -0.06 | 0.04  | 1 | 1        | 0.019    | 0.22     | NA | NA | NA | NA |
| 0.05  | -0.11 | 0     | 0.02  | 1 | 0.96     | 1        | 0.73     | NA | NA | NA | NA |
| -0.02 | 0.35  | -0.02 | -0.01 | 1 | 0.0026   | 0.47     | 0.81     | NA | NA | NA | NA |
| 0.01  | 0.05  | 0     | 0.03  | 1 | 1        | 1        | 0.51     | NA | NA | NA | NA |
| 0     | -0.26 | -0.11 | 0.08  | 1 | 0.33     | 0.0025   | 0.17     | NA | NA | NA | NA |
| 0     | 0.15  | -0.09 | -0.08 | 1 | 6.70E-05 | 2.40E-05 | 0.00034  | NA | NA | NA | NA |

|       |       |       |       |    |        |          |          |    |    |    |    |
|-------|-------|-------|-------|----|--------|----------|----------|----|----|----|----|
| -0.01 | 0.05  | -0.07 | 0.04  | 1  | 0.11   | 0.017    | 0.37     | NA | NA | NA | NA |
| 0.2   | 0.7   | -0.14 | NA    | 1  | 0.19   | 0.081    | NA       | NA | NA | NA | NA |
| NA    | -0.05 | -0.07 | -0.11 | NA | 0.25   | 0.083    | 2.70E-05 | NA | NA | NA | NA |
| NA    | 0.86  | -0.4  | NA    | NA | 0.54   | 0.14     | NA       | NA | NA | NA | NA |
| NA    | 0.84  | -0.01 | 0.34  | NA | 0.0042 | 0.99     | 3.30E-08 | NA | NA | NA | NA |
| NA    | NA    | 0     | 0.08  | NA | NA     | 1        | 0.49     | NA | NA | NA | NA |
| NA    | -0.02 | 0     | 0.04  | NA | 1      | 1        | 0.74     | NA | NA | NA | NA |
| NA    | NA    | 0.07  | 0.08  | NA | NA     | 0.1      | 0.19     | NA | NA | NA | NA |
| NA    | 0     | 0.07  | -0.06 | NA | 1      | 0.29     | 0.16     | NA | NA | NA | NA |
| NA    | NA    | -0.12 | NA    | NA | NA     | 0.053    | NA       | NA | NA | NA | NA |
| NA    | NA    | -0.04 | NA    | NA | NA     | 0.9      | NA       | NA | NA | NA | NA |
| NA    | NA    | -0.09 | -0.04 | NA | NA     | 0.008    | 0.4      | NA | NA | NA | NA |
| NA    | -0.21 | -0.15 | -0.05 | NA | 0.53   | 0.00041  | 0.51     | NA | NA | NA | NA |
| NA    | NA    | -0.3  | 0.11  | NA | NA     | 2.10E-06 | 0.76     | NA | NA | NA | NA |
| NA    | NA    | 0.19  | NA    | NA | NA     | 0.62     | NA       | NA | NA | NA | NA |
| NA    | 0.01  | -0.2  | -0.21 | NA | 1      | 0.13     | 0.44     | NA | NA | NA | NA |
| NA    | NA    | 0.13  | 0.25  | NA | NA     | 0.35     | 0.028    | NA | NA | NA | NA |
| NA    | NA    | -0.53 | NA    | NA | NA     | 0.013    | NA       | NA | NA | NA | NA |
| NA    | NA    | NA    | NA    | NA | NA     | NA       | NA       | NA | NA | NA | NA |
| NA    | 0.05  | -0.09 | -0.02 | NA | 0.11   | 0.002    | 0.64     | NA | NA | NA | NA |
| NA    | NA    | NA    | NA    | NA | NA     | NA       | NA       | NA | NA | NA | NA |
| NA    | NA    | -0.13 | -0.09 | NA | NA     | 0.014    | 0.44     | NA | NA | NA | NA |
| NA    | NA    | -0.12 | -0.18 | NA | NA     | 0.48     | 0.43     | NA | NA | NA | NA |
| NA    | -0.08 | -0.07 | 0.04  | NA | 0.22   | 0.012    | 0.22     | NA | NA | NA | NA |
| NA    | 0.02  | -0.13 | 0.12  | NA | 1      | 0.023    | 0.069    | NA | NA | NA | NA |
| NA    | NA    | -0.31 | 0.5   | NA | NA     | 0.42     | 1        | NA | NA | NA | NA |
| NA    | 0.13  | 0.04  | 0.06  | NA | 0.9    | 0.48     | 0.22     | NA | NA | NA | NA |
| NA    | NA    | 0.06  | 0     | NA | NA     | 0.76     | 1        | NA | NA | NA | NA |
| NA    | NA    | NA    | NA    | NA | NA     | NA       | NA       | NA | NA | NA | NA |
| NA    | NA    | -0.01 | -0.02 | NA | NA     | 0.85     | 0.45     | NA | NA | NA | NA |

|      |       |       |       |          |          |          |          |    |    |    |    |
|------|-------|-------|-------|----------|----------|----------|----------|----|----|----|----|
| NA   | NA    | -0.14 | -0.06 | NA       | NA       | 0.059    | 0.71     | NA | NA | NA | NA |
| NA   | NA    | NA    | 0.31  | NA       | NA       | NA       | 0.32     | NA | NA | NA | NA |
| NA   | 0.13  | -0.06 | -0.01 | NA       | 0.0039   | 0.0035   | 0.75     | NA | NA | NA | NA |
| NA   | -0.01 | 0.03  | -0.06 | NA       | 1        | 0.66     | 0.17     | NA | NA | NA | NA |
| NA   | NA    | -0.02 | 0     | NA       | NA       | 0.7      | 1        | NA | NA | NA | NA |
| NA   | -0.67 | -0.04 | 0.06  | NA       | 0.88     | 0.83     | 0.73     | NA | NA | NA | NA |
| NA   | NA    | 0.08  | NA    | NA       | NA       | 0.82     | NA       | NA | NA | NA | NA |
| NA   | 0.31  | -0.14 | -0.05 | NA       | 0.21     | 0.022    | 0.71     | NA | NA | NA | NA |
| NA   | NA    | NA    | NA    | NA       | NA       | NA       | NA       | NA | NA | NA | NA |
| NA   | NA    | -0.04 | 0.11  | NA       | NA       | 0.61     | 0.18     | NA | NA | NA | NA |
| NA   | NA    | -0.13 | 0.1   | NA       | NA       | 0.00092  | 0.09     | NA | NA | NA | NA |
| NA   | NA    | -0.43 | NA    | NA       | NA       | 0.39     | NA       | NA | NA | NA | NA |
| NA   | NA    | NA    | NA    | NA       | NA       | NA       | NA       | NA | NA | NA | NA |
| NA   | NA    | -0.18 | -0.12 | NA       | NA       | 0.97     | 1        | NA | NA | NA | NA |
| NA   | NA    | -0.03 | 0.17  | NA       | NA       | 0.49     | 0.98     | NA | NA | NA | NA |
| NA   | 0.69  | -0.02 | 0.06  | NA       | 0.72     | 0.55     | 0.15     | NA | NA | NA | NA |
| NA   | 0.14  | -0.07 | 0.24  | NA       | 0.51     | 0.18     | 0.03     | NA | NA | NA | NA |
| 0.18 | -0.02 | -0.04 | -0.02 | 1.40E-09 | 0.14     | 0.0036   | 0.19     | NA | NA | NA | NA |
| 0.42 | 0.07  | -0.05 | -0.03 | 4.70E-09 | 0.11     | 0.059    | 0.32     | NA | NA | NA | NA |
| 0.22 | 0.08  | -0.01 | -0.04 | 1.40E-08 | 0.00013  | 0.87     | 0.12     | NA | NA | NA | NA |
| 0.39 | 0.07  | -0.01 | 0.07  | 2.20E-08 | 0.064    | 0.85     | 0.011    | NA | NA | NA | NA |
| 0.33 | 0.05  | -0.06 | 0     | 4.50E-08 | 0.12     | 7.10E-06 | 0.96     | NA | NA | NA | NA |
| 0.16 | 0.03  | -0.04 | 0.02  | 5.70E-08 | 0.21     | 0.037    | 0.2      | NA | NA | NA | NA |
| 0.68 | 0.17  | -0.04 | 0.35  | 7.50E-08 | 0.025    | 0.18     | 1.20E-06 | NA | NA | NA | NA |
| 0.23 | 0.27  | 0.05  | 0.42  | 1.60E-07 | 1.60E-06 | 0.13     | 2.00E-07 | NA | NA | NA | NA |
| 0.29 | 0.09  | -0.09 | 0     | 1.90E-07 | 0.04     | 1.10E-07 | 0.97     | NA | NA | NA | NA |
| 0.27 | 0.01  | -0.06 | -0.04 | 2.20E-07 | 0.9      | 0.01     | 0.085    | NA | NA | NA | NA |
| 0.81 | -0.03 | 0     | 0.06  | 2.30E-07 | 0.58     | 1        | 0.039    | NA | NA | NA | NA |
| 0.41 | 0.09  | -0.03 | -0.07 | 2.50E-07 | 0.34     | 0.29     | 0.0025   | NA | NA | NA | NA |
| 0.35 | 0.03  | -0.03 | 0.08  | 2.80E-07 | 0.35     | 0.26     | 0.019    | NA | NA | NA | NA |

|       |       |       |       |          |          |          |          |    |    |    |    |
|-------|-------|-------|-------|----------|----------|----------|----------|----|----|----|----|
| 0.17  | -0.01 | 0.04  | 0.04  | 4.50E-07 | 0.85     | 0.0072   | 0.006    | NA | NA | NA | NA |
| 0.49  | -0.01 | -0.07 | 0.01  | 4.90E-07 | 0.99     | 0.11     | 0.78     | NA | NA | NA | NA |
| -0.22 | -0.1  | -0.22 | -0.15 | 1.20E-06 | 0.037    | 0.00016  | 0.0099   | NA | NA | NA | NA |
| 0.14  | 0.01  | -0.03 | -0.02 | 1.40E-06 | 0.73     | 0.25     | 0.4      | NA | NA | NA | NA |
| 0.1   | 0.06  | -0.06 | 0.04  | 2.90E-06 | 2.30E-05 | 5.30E-06 | 0.018    | NA | NA | NA | NA |
| 0.3   | 0.14  | 0.01  | -0.03 | 3.20E-06 | 0.0021   | 0.89     | 0.34     | NA | NA | NA | NA |
| 0.37  | -0.03 | 0.03  | 0.08  | 3.20E-06 | 1        | 0.25     | 0.0065   | NA | NA | NA | NA |
| 0.25  | 0.23  | -0.04 | 0     | 3.60E-06 | 2.00E-04 | 0.32     | 1        | NA | NA | NA | NA |
| 0.21  | 0.05  | 0.01  | 0.05  | 5.60E-06 | 0.039    | 0.67     | 0.00094  | NA | NA | NA | NA |
| 0.24  | 0.04  | -0.02 | 0.01  | 7.60E-06 | 0.11     | 0.44     | 0.67     | NA | NA | NA | NA |
| 0.88  | 0.02  | 0.01  | 0.08  | 7.80E-06 | 0.77     | 0.75     | 0.0064   | NA | NA | NA | NA |
| 0.16  | -0.01 | -0.05 | 0.05  | 1.10E-05 | 0.64     | 0.00028  | 0.0032   | NA | NA | NA | NA |
| 0.2   | 0     | 0.05  | 0.04  | 1.20E-05 | 0.98     | 0.00093  | 0.023    | NA | NA | NA | NA |
| 0.19  | 0.17  | -0.04 | -0.03 | 1.30E-05 | 6.60E-07 | 0.024    | 0.064    | NA | NA | NA | NA |
| 0.94  | 0.52  | -0.1  | -0.1  | 1.30E-05 | 7.10E-07 | 0.12     | 0.089    | NA | NA | NA | NA |
| 0.95  | 0.12  | -0.02 | 0.03  | 1.50E-05 | 0.00024  | 0.84     | 0.86     | NA | NA | NA | NA |
| 0.15  | 0.02  | -0.02 | 0.08  | 1.60E-05 | 0.41     | 0.26     | 2.40E-06 | NA | NA | NA | NA |
| 0.13  | 0.23  | -0.05 | -0.04 | 2.20E-05 | 5.70E-08 | 0.0084   | 0.019    | NA | NA | NA | NA |
| 0.23  | 0.04  | 0.03  | 0.11  | 2.50E-05 | 0.23     | 0.12     | 2.10E-08 | NA | NA | NA | NA |
| 0.64  | 0.14  | 0.01  | 0.03  | 2.90E-05 | 0.31     | 0.8      | 0.41     | NA | NA | NA | NA |
| 0.18  | -0.02 | -0.02 | -0.03 | 3.10E-05 | 0.61     | 0.16     | 0.091    | NA | NA | NA | NA |
| 0.16  | 0.05  | 0.03  | 0.01  | 3.40E-05 | 0.076    | 0.39     | 0.87     | NA | NA | NA | NA |
| 0.31  | 0.07  | -0.03 | 0.13  | 4.20E-05 | 0.2      | 0.2      | 8.60E-08 | NA | NA | NA | NA |
| 0.41  | 0.13  | -0.02 | 0     | 4.40E-05 | 0.98     | 0.54     | 1        | NA | NA | NA | NA |
| 0.21  | 0.03  | -0.01 | 0.04  | 4.50E-05 | 0.46     | 0.79     | 0.11     | NA | NA | NA | NA |
| 0.39  | -0.01 | -0.01 | 0.18  | 5.00E-05 | 1        | 0.63     | 2.40E-06 | NA | NA | NA | NA |
| 0.1   | 0.09  | -0.02 | 0.01  | 7.50E-05 | 9.60E-08 | 0.027    | 0.57     | NA | NA | NA | NA |
| 0.16  | 0.07  | -0.05 | -0.09 | 8.40E-05 | 0.049    | 0.041    | 1.80E-08 | NA | NA | NA | NA |
| 0.42  | NA    | -0.08 | 0.21  | 0.00011  | NA       | 0.012    | 9.40E-06 | NA | NA | NA | NA |
| 0.28  | 0.1   | 0     | 0.1   | 0.00011  | 0.0019   | 0.86     | 0.00016  | NA | NA | NA | NA |

|       |       |       |       |          |          |          |         |    |    |    |    |
|-------|-------|-------|-------|----------|----------|----------|---------|----|----|----|----|
| 0.14  | 0.05  | -0.03 | 0.01  | 0.00012  | 0.058    | 0.081    | 0.34    | NA | NA | NA | NA |
| 0.63  | 0.02  | -0.05 | -0.07 | 0.00012  | 1        | 0.46     | 0.25    | NA | NA | NA | NA |
| 0.27  | 0.1   | 0     | -0.01 | 0.00013  | 0.01     | 0.94     | 0.75    | NA | NA | NA | NA |
| -0.67 | -0.59 | 0.11  | 0     | 0.00014  | 0.0011   | 0.0011   | 0.93    | NA | NA | NA | NA |
| 0.36  | -0.08 | -0.03 | 0.02  | 0.00014  | 0.34     | 0.33     | 0.4     | NA | NA | NA | NA |
| 0.27  | 0.21  | -0.08 | -0.05 | 0.00014  | 0.00017  | 7.70E-05 | 0.066   | NA | NA | NA | NA |
| 0.14  | 0.01  | 0.01  | -0.03 | 0.00015  | 0.81     | 0.75     | 0.26    | NA | NA | NA | NA |
| 0.11  | 0.03  | -0.07 | -0.03 | 0.00017  | 0.16     | 3.00E-05 | 0.029   | NA | NA | NA | NA |
| 0.14  | 0.21  | -0.04 | -0.01 | 0.00018  | 1.40E-07 | 0.049    | 0.69    | NA | NA | NA | NA |
| -0.27 | -0.26 | -0.05 | 0.09  | 2.00E-04 | 0.0012   | 0.011    | 0.00024 | NA | NA | NA | NA |
| 0.19  | 0.08  | -0.05 | 0.04  | 0.00026  | 0.032    | 0.00068  | 0.03    | NA | NA | NA | NA |
| 0.19  | 0.03  | 0.01  | -0.03 | 0.00026  | 0.43     | 0.94     | 0.27    | NA | NA | NA | NA |
| 0.14  | 0.03  | -0.04 | 0.05  | 0.00029  | 0.4      | 0.0095   | 0.0013  | NA | NA | NA | NA |
| 0.17  | 0.01  | -0.06 | -0.03 | 3.00E-04 | 0.95     | 0.0014   | 0.27    | NA | NA | NA | NA |
| 0.17  | 0.01  | -0.03 | 0.06  | 0.00031  | 0.91     | 0.042    | 0.00029 | NA | NA | NA | NA |
| 0.73  | 0.06  | -0.08 | -0.03 | 0.00031  | 0.91     | 0.03     | 0.6     | NA | NA | NA | NA |
| 0.17  | 0.06  | -0.03 | -0.04 | 0.00033  | 0.0047   | 0.32     | 0.059   | NA | NA | NA | NA |
| 0.11  | 0.02  | -0.04 | -0.02 | 0.00039  | 0.5      | 0.037    | 0.27    | NA | NA | NA | NA |
| 0.21  | 0.09  | -0.01 | 0.05  | 4.00E-04 | 0.082    | 0.72     | 0.11    | NA | NA | NA | NA |
| 0.22  | 0.02  | 0.01  | 0.07  | 0.00042  | 0.64     | 0.61     | 0.021   | NA | NA | NA | NA |
| 0.15  | 0.14  | -0.02 | 0     | 0.00056  | 4.60E-05 | 0.31     | 1       | NA | NA | NA | NA |
| 0.09  | 0.11  | -0.01 | -0.02 | 0.00056  | 0.00043  | 0.75     | 0.18    | NA | NA | NA | NA |
| 0.1   | 0.1   | 0     | 0     | 0.00062  | 0.0011   | 0.92     | 0.96    | NA | NA | NA | NA |
| -0.09 | -0.02 | -0.03 | 0.03  | 0.00066  | 0.39     | 0.082    | 0.058   | NA | NA | NA | NA |
| 0.05  | 0.04  | -0.04 | 0.01  | 0.00068  | 0.0084   | 3.10E-05 | 0.46    | NA | NA | NA | NA |
| 0.15  | 0.07  | -0.03 | 0     | 0.00073  | 0.054    | 0.25     | 1       | NA | NA | NA | NA |
| 0.15  | 0.06  | 0.02  | 0     | 0.00078  | 0.064    | 0.33     | 1       | NA | NA | NA | NA |
| 0.21  | 0.12  | -0.12 | 0.05  | 0.00092  | 0.32     | 7.80E-05 | 0.1     | NA | NA | NA | NA |
| 0.19  | 0.01  | 0.01  | -0.03 | 0.0011   | 0.83     | 0.81     | 0.3     | NA | NA | NA | NA |
| 0.18  | 0.22  | -0.01 | 0     | 0.0011   | 1.50E-08 | 0.49     | 0.9     | NA | NA | NA | NA |

|       |       |       |       |        |          |          |          |    |    |    |    |
|-------|-------|-------|-------|--------|----------|----------|----------|----|----|----|----|
| 0.12  | 0.03  | -0.04 | 0     | 0.0012 | 0.28     | 0.038    | 1        | NA | NA | NA | NA |
| 0.1   | 0.08  | -0.05 | 0.06  | 0.0012 | 0.01     | 0.0026   | 0.0016   | NA | NA | NA | NA |
| 0.12  | 0.05  | 0     | 0.08  | 0.0013 | 0.078    | 0.98     | 3.00E-05 | NA | NA | NA | NA |
| 0.08  | 0.03  | -0.04 | -0.02 | 0.0016 | 0.073    | 0.0015   | 0.19     | NA | NA | NA | NA |
| 0.22  | 0.22  | -0.06 | -0.03 | 0.0016 | 7.40E-07 | 0.04     | 0.44     | NA | NA | NA | NA |
| 0.42  | -0.08 | -0.03 | -0.06 | 0.0019 | 0.15     | 0.68     | 0.31     | NA | NA | NA | NA |
| -0.13 | -0.04 | 0.01  | 0.06  | 0.002  | 0.5      | 0.79     | 0.0074   | NA | NA | NA | NA |
| 0.15  | 0.15  | -0.02 | 0.06  | 0.002  | 2.40E-05 | 0.34     | 0.026    | NA | NA | NA | NA |
| 0.09  | 0.03  | -0.02 | 0.02  | 0.002  | 0.087    | 0.055    | 0.076    | NA | NA | NA | NA |
| 0.45  | -0.12 | -0.03 | -0.04 | 0.0021 | 0.089    | 0.66     | 0.53     | NA | NA | NA | NA |
| 0.13  | 0     | -0.05 | -0.03 | 0.0021 | 1        | 0.0017   | 0.029    | NA | NA | NA | NA |
| 0.27  | 0.11  | -0.03 | -0.02 | 0.0022 | 0.059    | 0.25     | 0.48     | NA | NA | NA | NA |
| 0.13  | 0.06  | -0.02 | 0.01  | 0.0022 | 0.16     | 0.23     | 0.63     | NA | NA | NA | NA |
| 0.11  | 0.05  | -0.04 | -0.01 | 0.0022 | 0.1      | 0.018    | 0.49     | NA | NA | NA | NA |
| 0.2   | 0.08  | -0.05 | -0.01 | 0.0023 | 0.19     | 0.021    | 0.65     | NA | NA | NA | NA |
| 0.28  | 0.26  | -0.04 | 0     | 0.0024 | 0.006    | 0.57     | 1        | NA | NA | NA | NA |
| 0.16  | -0.06 | -0.05 | 0.06  | 0.0024 | 0.02     | 8.90E-05 | 4.00E-05 | NA | NA | NA | NA |
| -0.19 | -0.21 | -0.13 | -0.03 | 0.0026 | 2.60E-07 | 1.00E-04 | 0.63     | NA | NA | NA | NA |
| -0.3  | -0.13 | 0     | 0.17  | 0.0031 | 0.28     | 0.99     | 1.40E-05 | NA | NA | NA | NA |
| 0.35  | -0.08 | 0.03  | 0.06  | 0.0032 | 0.28     | 0.51     | 0.23     | NA | NA | NA | NA |
| 0.13  | 0.04  | -0.05 | 0.08  | 0.0036 | 0.29     | 0.015    | 0.0041   | NA | NA | NA | NA |
| -0.14 | -0.04 | -0.03 | 0.06  | 0.0038 | 0.58     | 0.074    | 0.0056   | NA | NA | NA | NA |
| 0.09  | 0.13  | -0.03 | 0.05  | 0.0039 | 3.30E-07 | 0.076    | 0.0056   | NA | NA | NA | NA |
| 0.1   | 0.21  | -0.03 | 0.07  | 0.0041 | 4.70E-06 | 0.067    | 0.00026  | NA | NA | NA | NA |
| -0.1  | -0.04 | -0.07 | -0.02 | 0.0041 | 0.32     | 0.013    | 0.54     | NA | NA | NA | NA |
| 0.11  | 0.02  | -0.1  | -0.1  | 0.0042 | 0.36     | 4.70E-07 | 1.50E-06 | NA | NA | NA | NA |
| 0.12  | 0.05  | -0.01 | 0.13  | 0.0043 | 0.19     | 0.69     | 4.80E-08 | NA | NA | NA | NA |
| 0.04  | 0.05  | -0.05 | -0.02 | 0.0045 | 3.60E-05 | 3.80E-05 | 0.18     | NA | NA | NA | NA |
| 0.19  | 0.05  | -0.03 | 0.13  | 0.0046 | 0.17     | 0.19     | 0.0018   | NA | NA | NA | NA |
| 0.16  | -0.01 | -0.05 | -0.06 | 0.0046 | 0.55     | 0.21     | 0.13     | NA | NA | NA | NA |



|       |       |       |       |        |          |          |        |    |    |    |    |
|-------|-------|-------|-------|--------|----------|----------|--------|----|----|----|----|
| 0.1   | 0.01  | 0.01  | 0.03  | 0.0047 | 0.73     | 0.34     | 0.014  | NA | NA | NA | NA |
| 0.12  | 0.09  | -0.08 | 0.01  | 0.0047 | 0.0093   | 6.90E-05 | 0.79   | NA | NA | NA | NA |
| 0.06  | 0.01  | -0.03 | -0.02 | 0.0058 | 0.51     | 0.034    | 0.12   | NA | NA | NA | NA |
| 0.32  | 0.09  | -0.09 | -0.07 | 0.0061 | 0.022    | 6.20E-05 | 0.0067 | NA | NA | NA | NA |
| 0.08  | 0.08  | -0.05 | 0.02  | 0.0062 | 0.0027   | 0.00033  | 0.34   | NA | NA | NA | NA |
| 0.09  | 0.03  | -0.05 | -0.05 | 0.0067 | 0.69     | 0.027    | 0.043  | NA | NA | NA | NA |
| 0.22  | 0.06  | -0.03 | 0.02  | 0.0068 | 0.3      | 0.23     | 0.67   | NA | NA | NA | NA |
| 0.08  | 0.07  | -0.05 | -0.04 | 0.0071 | 0.00089  | 0.00016  | 0.0055 | NA | NA | NA | NA |
| 0.14  | 0.17  | 0.02  | 0.05  | 0.0071 | 0.00023  | 0.4      | 0.021  | NA | NA | NA | NA |
| 0.08  | 0.07  | -0.01 | 0.05  | 0.0075 | 0.014    | 0.47     | 0.0045 | NA | NA | NA | NA |
| 0.11  | 0.06  | -0.03 | 0.03  | 0.0078 | 0.15     | 0.055    | 0.1    | NA | NA | NA | NA |
| 0.09  | 0.17  | -0.07 | -0.03 | 0.0081 | 1.40E-09 | 0.0049   | 0.26   | NA | NA | NA | NA |
| 0.11  | 0     | 0     | 0.06  | 0.0085 | 1        | 0.87     | 0.0059 | NA | NA | NA | NA |
| -0.08 | -0.03 | -0.03 | 0.01  | 0.0085 | 0.37     | 0.046    | 0.82   | NA | NA | NA | NA |
| 0.17  | 0.28  | -0.05 | 0.09  | 0.0086 | 4.70E-06 | 0.042    | 0.007  | NA | NA | NA | NA |
| 0.05  | 0.02  | -0.05 | 0.03  | 0.0087 | 0.29     | 1.40E-06 | 0.037  | NA | NA | NA | NA |
| 0.2   | 0.03  | -0.05 | 0.01  | 0.0091 | 0.5      | 0.057    | 0.81   | NA | NA | NA | NA |
| -0.15 | -0.11 | -0.08 | -0.03 | 0.0094 | 0.025    | 0.017    | 0.5    | NA | NA | NA | NA |
| 0.2   | 0.03  | -0.01 | -0.02 | 0.0099 | 0.6      | 0.53     | 0.33   | NA | NA | NA | NA |
| 0.05  | 0.04  | -0.02 | 0.03  | 0.011  | 0.0061   | 0.03     | 0.0098 | NA | NA | NA | NA |
| 0.09  | 0.03  | -0.02 | 0.05  | 0.011  | 0.047    | 0.04     | 0.0014 | NA | NA | NA | NA |
| -0.12 | 0     | -0.05 | -0.01 | 0.011  | 1        | 0.015    | 0.8    | NA | NA | NA | NA |
| 0.09  | 0.1   | -0.04 | -0.06 | 0.012  | 0.31     | 0.26     | 0.13   | NA | NA | NA | NA |
| -0.25 | 0.28  | -0.03 | 0.09  | 0.012  | 0.0034   | 0.29     | 0.0074 | NA | NA | NA | NA |
| 0.03  | 0.05  | -0.06 | -0.02 | 0.012  | 4.80E-05 | 1.70E-07 | 0.2    | NA | NA | NA | NA |
| 0.1   | 0.16  | -0.11 | -0.09 | 0.012  | 3.70E-06 | 0.00081  | 0.0013 | NA | NA | NA | NA |
| 0.23  | 0.08  | -0.14 | -0.04 | 0.012  | 0.17     | 1.20E-06 | 0.41   | NA | NA | NA | NA |
| 0.88  | 0.21  | -0.08 | -0.03 | 0.012  | 1        | 0.26     | 0.8    | NA | NA | NA | NA |
| 0.16  | 0.13  | -0.04 | -0.04 | 0.013  | 0.023    | 0.033    | 0.049  | NA | NA | NA | NA |
| 0.17  | 0.14  | 0     | 0.01  | 0.013  | 0.00092  | 0.99     | 0.79   | NA | NA | NA | NA |

|       |       |       |       |       |          |          |          |    |    |    |    |
|-------|-------|-------|-------|-------|----------|----------|----------|----|----|----|----|
| -0.17 | -0.08 | -0.04 | -0.11 | 0.013 | 0.14     | 0.66     | 0.13     | NA | NA | NA | NA |
| 0.14  | 0.11  | 0.02  | 0.08  | 0.013 | 0.13     | 0.57     | 0.002    | NA | NA | NA | NA |
| 0.2   | 0.01  | -0.14 | -0.03 | 0.014 | 1        | 8.00E-09 | 0.28     | NA | NA | NA | NA |
| -0.51 | -0.54 | -0.05 | -0.05 | 0.014 | 0.0015   | 0.47     | 0.35     | NA | NA | NA | NA |
| 0.09  | -0.02 | -0.08 | -0.13 | 0.014 | 0.66     | 0.0016   | 8.30E-06 | NA | NA | NA | NA |
| 0.35  | 0.39  | -0.1  | -0.08 | 0.014 | 0.002    | 0.00026  | 0.01     | NA | NA | NA | NA |
| 0.2   | 0.02  | -0.02 | 0.06  | 0.014 | 0.84     | 0.39     | 0.023    | NA | NA | NA | NA |
| 0.43  | 0     | -0.1  | 0.01  | 0.015 | 1        | 0.0021   | 0.86     | NA | NA | NA | NA |
| 0.08  | 0.11  | -0.06 | 0.05  | 0.015 | 5.20E-05 | 0.074    | 0.12     | NA | NA | NA | NA |
| 0.28  | -0.1  | -0.03 | -0.07 | 0.015 | 0.1      | 0.31     | 0.038    | NA | NA | NA | NA |
| 0.37  | -0.01 | -0.02 | 0.09  | 0.015 | 1        | 0.65     | 0.1      | NA | NA | NA | NA |
| 0.11  | 0.08  | -0.06 | -0.02 | 0.016 | 0.029    | 0.096    | 0.73     | NA | NA | NA | NA |
| 0.04  | 0.09  | 0     | 0     | 0.016 | 7.00E-06 | 0.98     | 0.84     | NA | NA | NA | NA |
| -0.11 | -0.11 | -0.02 | -0.01 | 0.016 | 0.0013   | 0.28     | 0.71     | NA | NA | NA | NA |
| 0.1   | 0.11  | -0.03 | 0.01  | 0.016 | 0.044    | 0.047    | 0.45     | NA | NA | NA | NA |
| 0.05  | 0.09  | -0.04 | 0.05  | 0.016 | 0.00022  | 0.00096  | 3.50E-05 | NA | NA | NA | NA |
| -0.08 | 0     | -0.05 | 0.03  | 0.017 | 1        | 0.0041   | 0.22     | NA | NA | NA | NA |
| -0.17 | -0.17 | -0.11 | 0.01  | 0.017 | 0.0097   | 4.90E-05 | 0.73     | NA | NA | NA | NA |
| 0.08  | 0.01  | -0.03 | 0.05  | 0.018 | 0.68     | 0.1      | 0.015    | NA | NA | NA | NA |
| 0.09  | 0.11  | 0     | 0.01  | 0.02  | 0.0075   | 0.78     | 0.53     | NA | NA | NA | NA |
| 0.08  | 0.05  | -0.04 | -0.02 | 0.02  | 0.021    | 0.019    | 0.32     | NA | NA | NA | NA |
| 0.13  | 0.06  | -0.06 | 0.01  | 0.02  | 0.17     | 0.00041  | 0.54     | NA | NA | NA | NA |
| 0.37  | 0.35  | -0.1  | -0.04 | 0.021 | 0.019    | 0.0013   | 0.52     | NA | NA | NA | NA |
| 0.42  | 0     | -0.12 | -0.09 | 0.021 | 1        | 5.20E-05 | 0.019    | NA | NA | NA | NA |
| 0.15  | 0.07  | -0.03 | 0.07  | 0.022 | 0.071    | 0.17     | 0.0013   | NA | NA | NA | NA |
| 0.07  | 0.21  | -0.09 | -0.1  | 0.024 | 2.30E-07 | 0.0073   | 0.00099  | NA | NA | NA | NA |
| 0.06  | 0.03  | -0.01 | -0.01 | 0.024 | 0.042    | 0.47     | 0.63     | NA | NA | NA | NA |
| 0.3   | -0.11 | -0.06 | 0.09  | 0.024 | 1        | 0.26     | 0.13     | NA | NA | NA | NA |
| 0.18  | 0.45  | 0.04  | -0.03 | 0.024 | 1.50E-06 | 0.47     | 0.61     | NA | NA | NA | NA |
| 0.06  | 0.1   | -0.03 | -0.01 | 0.025 | 7.80E-05 | 0.055    | 0.65     | NA | NA | NA | NA |

|       |       |       |       |       |          |          |          |    |    |    |    |
|-------|-------|-------|-------|-------|----------|----------|----------|----|----|----|----|
| 0.08  | 0.05  | -0.04 | 0.01  | 0.026 | 0.093    | 0.036    | 0.89     | NA | NA | NA | NA |
| -0.15 | 0.15  | -0.04 | 0.06  | 0.027 | 0.035    | 0.24     | 0.19     | NA | NA | NA | NA |
| 0.08  | 0.02  | -0.03 | 0     | 0.027 | 0.46     | 0.076    | 0.86     | NA | NA | NA | NA |
| 0.13  | 0.05  | -0.03 | -0.02 | 0.027 | 0.38     | 0.12     | 0.55     | NA | NA | NA | NA |
| 0.7   | 0.33  | -0.11 | 0.03  | 0.027 | 0.19     | 0.068    | 0.67     | NA | NA | NA | NA |
| 0.24  | 0.37  | -0.14 | -0.04 | 0.027 | 2.50E-06 | 5.40E-06 | 0.64     | NA | NA | NA | NA |
| 0.09  | 0.05  | -0.03 | 0.02  | 0.028 | 0.089    | 0.016    | 0.092    | NA | NA | NA | NA |
| 0.08  | 0.08  | 0.01  | -0.02 | 0.03  | 5.70E-05 | 0.69     | 0.22     | NA | NA | NA | NA |
| 0.34  | 0.84  | 0.04  | 0.03  | 0.03  | 0.046    | 0.16     | 0.26     | NA | NA | NA | NA |
| 0.11  | -0.02 | -0.07 | -0.01 | 0.03  | 0.71     | 0.0033   | 0.72     | NA | NA | NA | NA |
| 0.28  | 0.12  | 0     | 0.05  | 0.03  | 0.31     | 1        | 0.2      | NA | NA | NA | NA |
| 0.15  | 0.05  | -0.08 | 0     | 0.031 | 0.35     | 0.019    | 1        | NA | NA | NA | NA |
| 0.06  | 0.02  | 0.01  | 0.05  | 0.031 | 0.36     | 0.36     | 2.20E-05 | NA | NA | NA | NA |
| 0.11  | 0.03  | -0.05 | 0.03  | 0.031 | 0.28     | 6.50E-05 | 0.039    | NA | NA | NA | NA |
| 0.07  | 0.07  | -0.05 | 0.07  | 0.031 | 0.027    | 0.0038   | 0.0044   | NA | NA | NA | NA |
| 0.28  | 0.23  | 0.02  | 0.06  | 0.033 | 0.04     | 0.28     | 0.001    | NA | NA | NA | NA |
| -0.12 | -0.14 | 0     | 0.1   | 0.034 | 0.016    | 0.88     | 8.00E-04 | NA | NA | NA | NA |
| 0.09  | 0.02  | 0.01  | 0.06  | 0.034 | 0.39     | 0.61     | 0.00064  | NA | NA | NA | NA |
| 0.1   | 0.04  | 0.05  | 0     | 0.034 | 0.17     | 0.027    | 0.95     | NA | NA | NA | NA |
| 0.15  | 0.19  | -0.01 | 0.01  | 0.035 | 0.00016  | 0.48     | 0.53     | NA | NA | NA | NA |
| -0.18 | -0.08 | -0.01 | 0     | 0.035 | 0.5      | 0.6      | 0.91     | NA | NA | NA | NA |
| 0.05  | -0.02 | -0.09 | -0.03 | 0.036 | 0.38     | 1.50E-06 | 0.16     | NA | NA | NA | NA |
| -0.13 | 0.02  | -0.01 | 0.03  | 0.037 | 0.96     | 0.87     | 0.57     | NA | NA | NA | NA |
| 0.39  | 0.83  | 0     | 0.04  | 0.037 | 0.0016   | 1        | 0.25     | NA | NA | NA | NA |
| 0.15  | 0.17  | -0.11 | 0.03  | 0.037 | 0.0038   | 0.0031   | 0.51     | NA | NA | NA | NA |
| 0.07  | 0.17  | -0.01 | 0.01  | 0.037 | 9.30E-05 | 0.87     | 0.81     | NA | NA | NA | NA |
| 0.05  | 0.07  | 0     | 0.02  | 0.037 | 0.0042   | 0.86     | 0.27     | NA | NA | NA | NA |
| 0.07  | 0.04  | -0.03 | 0     | 0.038 | 0.15     | 0.017    | 1        | NA | NA | NA | NA |
| 0.08  | 0.02  | 0.01  | 0.02  | 0.038 | 0.78     | 0.86     | 0.62     | NA | NA | NA | NA |
| 0.1   | 0.01  | -0.08 | -0.04 | 0.039 | 0.94     | 0.024    | 0.15     | NA | NA | NA | NA |

|       |       |       |       |       |        |          |          |    |    |    |    |
|-------|-------|-------|-------|-------|--------|----------|----------|----|----|----|----|
| 0.1   | 0.1   | -0.02 | 0.06  | 0.039 | 0.0095 | 0.32     | 0.0014   | NA | NA | NA | NA |
| -0.24 | -0.2  | -0.01 | 0.07  | 0.04  | 0.018  | 0.45     | 4.00E-04 | NA | NA | NA | NA |
| -0.09 | 0.07  | -0.02 | 0     | 0.041 | 0.31   | 0.41     | 0.91     | NA | NA | NA | NA |
| -0.18 | -0.13 | -0.05 | 0     | 0.041 | 0.052  | 0.011    | 1        | NA | NA | NA | NA |
| -0.07 | 0.03  | -0.07 | 0.01  | 0.042 | 0.44   | 5.70E-05 | 0.64     | NA | NA | NA | NA |
| 0.24  | 0.02  | -0.07 | 0.08  | 0.042 | 1      | 0.068    | 0.58     | NA | NA | NA | NA |
| 0.06  | -0.01 | -0.04 | 0.04  | 0.042 | 0.95   | 0.041    | 0.11     | NA | NA | NA | NA |
| 0.11  | 0     | -0.01 | 0.02  | 0.043 | 1      | 0.65     | 0.36     | NA | NA | NA | NA |
| 0.37  | 0     | -0.06 | -0.01 | 0.043 | 1      | 0.0062   | 0.89     | NA | NA | NA | NA |
| 0.13  | 0.16  | 0.01  | 0     | 0.044 | 0.013  | 0.86     | 0.94     | NA | NA | NA | NA |
| 0.15  | 0.1   | -0.06 | 0.03  | 0.044 | 0.0079 | 0.00078  | 0.2      | NA | NA | NA | NA |
| 0.13  | 0.03  | -0.02 | -0.01 | 0.046 | 0.81   | 0.44     | 0.86     | NA | NA | NA | NA |
| 0.08  | 0.08  | -0.06 | 0.01  | 0.05  | 0.043  | 0.0015   | 0.84     | NA | NA | NA | NA |
| 0.12  | -0.01 | -0.05 | 0.02  | 0.051 | 0.94   | 0.023    | 0.52     | NA | NA | NA | NA |
| 0.09  | -0.01 | -0.03 | 0.04  | 0.053 | 0.84   | 0.13     | 0.073    | NA | NA | NA | NA |
| 0.05  | 0.06  | -0.07 | -0.02 | 0.053 | 0.0034 | 1.70E-06 | 0.33     | NA | NA | NA | NA |
| 0.05  | 0.08  | -0.02 | 0     | 0.055 | 0.0017 | 0.23     | 0.84     | NA | NA | NA | NA |
| 0.55  | -0.01 | 0.02  | 0.01  | 0.059 | 1      | 0.79     | 0.99     | NA | NA | NA | NA |
| 0.11  | 0.13  | -0.03 | 0.03  | 0.059 | 0.0028 | 0.21     | 0.37     | NA | NA | NA | NA |
| 0.03  | 0.03  | 0     | 0.05  | 0.06  | 0.024  | 0.92     | 0.0018   | NA | NA | NA | NA |
| 0.31  | 0     | -0.06 | 0.12  | 0.06  | 1      | 0.026    | 0.0012   | NA | NA | NA | NA |
| 0.27  | 0.2   | -0.06 | -0.01 | 0.062 | 0.018  | 0.015    | 0.84     | NA | NA | NA | NA |
| 0.12  | 0.02  | -0.02 | 0.04  | 0.062 | 0.8    | 0.56     | 0.19     | NA | NA | NA | NA |
| 0.06  | 0.07  | -0.02 | -0.02 | 0.063 | 0.0048 | 0.25     | 0.16     | NA | NA | NA | NA |
| 0.05  | 0.01  | 0     | -0.02 | 0.063 | 0.79   | 1        | 0.39     | NA | NA | NA | NA |
| -0.03 | 0.01  | -0.04 | -0.01 | 0.063 | 0.48   | 4.00E-04 | 0.65     | NA | NA | NA | NA |
| 0.08  | 0.05  | -0.04 | 0     | 0.064 | 0.092  | 0.0024   | 0.78     | NA | NA | NA | NA |
| 0.1   | 0     | -0.04 | -0.02 | 0.064 | 1      | 0.15     | 0.28     | NA | NA | NA | NA |
| 0.21  | 0.06  | 0.01  | -0.02 | 0.064 | 0.53   | 0.84     | 0.55     | NA | NA | NA | NA |
| -0.2  | -0.19 | -0.04 | -0.01 | 0.066 | 0.059  | 0.082    | 0.57     | NA | NA | NA | NA |

|       |       |       |       |       |          |          |          |    |    |    |    |
|-------|-------|-------|-------|-------|----------|----------|----------|----|----|----|----|
| 0.06  | 0.05  | -0.02 | 0.04  | 0.067 | 0.018    | 0.17     | 0.035    | NA | NA | NA | NA |
| 0.1   | 0.11  | 0     | -0.01 | 0.068 | 0.00073  | 0.87     | 0.54     | NA | NA | NA | NA |
| -0.08 | -0.02 | -0.08 | 0     | 0.068 | 0.8      | 0.0024   | 1        | NA | NA | NA | NA |
| 0.05  | 0.03  | -0.05 | -0.01 | 0.069 | 0.15     | 8.70E-06 | 0.57     | NA | NA | NA | NA |
| 0.09  | -0.01 | -0.02 | 0.07  | 0.07  | 1        | 0.4      | 0.00019  | NA | NA | NA | NA |
| -0.09 | -0.11 | -0.02 | -0.02 | 0.071 | 0.0018   | 0.47     | 0.58     | NA | NA | NA | NA |
| -0.14 | -0.08 | 0.01  | 0.11  | 0.071 | 0.15     | 0.7      | 6.40E-05 | NA | NA | NA | NA |
| -0.06 | -0.03 | -0.04 | -0.02 | 0.072 | 0.55     | 0.034    | 0.44     | NA | NA | NA | NA |
| 0.11  | 0.02  | 0.02  | -0.02 | 0.072 | 0.6      | 0.61     | 0.39     | NA | NA | NA | NA |
| 0.07  | 0.09  | -0.03 | -0.04 | 0.073 | 0.011    | 0.16     | 0.079    | NA | NA | NA | NA |
| 0.09  | -0.01 | 0     | 0     | 0.073 | 0.92     | 1        | 0.91     | NA | NA | NA | NA |
| 0.18  | 0.14  | -0.2  | -0.07 | 0.073 | 0.056    | 0.00056  | 0.36     | NA | NA | NA | NA |
| 0.04  | 0.05  | -0.07 | -0.03 | 0.074 | 0.021    | 4.70E-07 | 0.029    | NA | NA | NA | NA |
| 0.19  | 0.34  | 0.02  | 0.13  | 0.074 | 1.90E-05 | 0.5      | 1.80E-06 | NA | NA | NA | NA |
| 0.05  | -0.01 | -0.04 | -0.01 | 0.074 | 0.79     | 0.0045   | 0.49     | NA | NA | NA | NA |
| -0.1  | -0.04 | 0.09  | 0.01  | 0.076 | 0.38     | 0.0031   | 0.69     | NA | NA | NA | NA |
| 0.13  | 0.11  | -0.04 | 0.04  | 0.076 | 0.015    | 0.0091   | 0.034    | NA | NA | NA | NA |
| 0.2   | -0.07 | -0.01 | 0     | 0.077 | 0.62     | 0.7      | 1        | NA | NA | NA | NA |
| 0.11  | 0.07  | -0.09 | -0.03 | 0.078 | 0.4      | 4.90E-05 | 0.42     | NA | NA | NA | NA |
| -0.15 | 0.03  | -0.04 | 0.2   | 0.078 | 1        | 0.39     | 0.43     | NA | NA | NA | NA |
| 0.1   | 0.02  | -0.04 | 0.06  | 0.078 | 0.81     | 0.018    | 0.0021   | NA | NA | NA | NA |
| 0.11  | 0.06  | -0.03 | 0.02  | 0.079 | 0.059    | 0.032    | 0.25     | NA | NA | NA | NA |
| 0.6   | -0.18 | -0.03 | 0.19  | 0.08  | 0.064    | 0.42     | 8.60E-05 | NA | NA | NA | NA |
| 0.32  | 0.46  | 0.12  | 0.21  | 0.082 | 0.01     | 0.023    | 0.00012  | NA | NA | NA | NA |
| 0.12  | 0.03  | -0.11 | -0.02 | 0.082 | 0.61     | 3.00E-07 | 0.41     | NA | NA | NA | NA |
| 0.42  | -0.08 | -0.09 | -0.07 | 0.082 | 0.5      | 0.0092   | 0.069    | NA | NA | NA | NA |
| 0.14  | 0.27  | -0.02 | 0.03  | 0.082 | 0.0031   | 0.46     | 0.23     | NA | NA | NA | NA |
| 0.16  | 0.02  | -0.01 | 0.01  | 0.082 | 0.83     | 0.61     | 0.68     | NA | NA | NA | NA |
| 0.11  | 0.04  | -0.08 | -0.03 | 0.084 | 0.4      | 6.30E-05 | 0.22     | NA | NA | NA | NA |
| 0.05  | 0.08  | -0.03 | 0.05  | 0.084 | 0.00017  | 0.0013   | 0.00031  | NA | NA | NA | NA |

|       |       |       |       |       |          |          |          |    |    |    |    |
|-------|-------|-------|-------|-------|----------|----------|----------|----|----|----|----|
| 0.12  | 0.03  | -0.08 | -0.02 | 0.086 | 0.63     | 0.032    | 0.61     | NA | NA | NA | NA |
| 0.13  | 0.14  | -0.04 | -0.05 | 0.088 | 0.13     | 0.27     | 0.16     | NA | NA | NA | NA |
| 0.14  | 0.08  | 0.06  | 0.24  | 0.088 | 0.24     | 0.11     | 3.70E-07 | NA | NA | NA | NA |
| 0.03  | 0.05  | -0.01 | -0.02 | 0.09  | 0.0026   | 0.26     | 0.17     | NA | NA | NA | NA |
| 0.11  | 0.03  | -0.02 | -0.02 | 0.09  | 0.31     | 0.12     | 0.18     | NA | NA | NA | NA |
| -0.27 | 0.19  | -0.32 | -0.51 | 0.091 | 0.092    | 0.00015  | 1.70E-07 | NA | NA | NA | NA |
| -0.05 | 0.13  | -0.04 | 0.04  | 0.092 | 0.0025   | 0.012    | 0.039    | NA | NA | NA | NA |
| 0.89  | 0.64  | 0.2   | 0     | 0.094 | 0.0052   | 0.00065  | 1        | NA | NA | NA | NA |
| 0.32  | 0.07  | -0.09 | 0.05  | 0.095 | 0.39     | 1.40E-05 | 0.12     | NA | NA | NA | NA |
| -0.05 | 0.02  | -0.03 | -0.01 | 0.096 | 0.78     | 0.084    | 0.8      | NA | NA | NA | NA |
| 0.11  | -0.05 | 0.01  | 0.14  | 0.096 | 0.34     | 0.79     | 3.70E-05 | NA | NA | NA | NA |
| -0.11 | 0.01  | 0     | 0     | 0.097 | 0.96     | 0.97     | 0.99     | NA | NA | NA | NA |
| 0.19  | -0.05 | -0.15 | -0.11 | 0.098 | 0.43     | 3.20E-07 | 0.0015   | NA | NA | NA | NA |
| -0.05 | 0.19  | -0.03 | 0.01  | 0.099 | 1.80E-08 | 0.071    | 0.52     | NA | NA | NA | NA |
| 0.08  | 0.13  | 0     | 0.05  | 0.1   | 0.0025   | 1        | 0.0098   | NA | NA | NA | NA |
| -0.19 | -0.04 | -0.03 | 0.05  | 0.1   | 0.68     | 0.2      | 0.12     | NA | NA | NA | NA |
| 0.16  | 0     | 0.02  | 0.09  | 0.1   | 1        | 0.71     | 0.037    | NA | NA | NA | NA |
| 0.32  | 0.01  | 0.09  | 0.08  | 0.1   | 1        | 1        | 0.013    | NA | NA | NA | NA |
| 0.05  | 0     | -0.02 | 0.01  | 0.1   | 0.86     | 0.13     | 0.43     | NA | NA | NA | NA |
| 0.17  | 0.13  | -0.04 | 0.01  | 0.1   | 0.11     | 0.074    | 0.69     | NA | NA | NA | NA |
| 0.05  | -0.01 | 0.02  | -0.01 | 0.1   | 0.94     | 0.15     | 0.64     | NA | NA | NA | NA |
| 0.93  | 0.05  | -0.16 | -0.12 | 0.11  | 0.67     | 1.50E-05 | 0.00011  | NA | NA | NA | NA |
| 0.11  | -0.03 | 0.03  | 0.02  | 0.11  | 0.82     | 0.57     | 0.74     | NA | NA | NA | NA |
| 0.12  | 0.08  | -0.05 | 0.01  | 0.11  | 0.36     | 0.041    | 0.87     | NA | NA | NA | NA |
| -0.1  | 0     | -0.05 | 0     | 0.12  | 1        | 0.023    | 0.97     | NA | NA | NA | NA |
| 0.06  | 0.03  | -0.03 | -0.02 | 0.12  | 0.3      | 0.095    | 0.23     | NA | NA | NA | NA |
| 0.17  | 0.01  | -0.01 | 0.03  | 0.12  | 0.8      | 0.47     | 0.14     | NA | NA | NA | NA |
| -0.12 | 0.01  | 0     | 0.02  | 0.12  | 1        | 0.96     | 0.49     | NA | NA | NA | NA |
| 0.09  | -0.04 | -0.05 | 0.04  | 0.12  | 0.24     | 0.039    | 0.14     | NA | NA | NA | NA |
| 0.17  | 0.02  | 0     | 0.08  | 0.12  | 0.67     | 0.9      | 0.00054  | NA | NA | NA | NA |

|       |       |       |       |      |          |          |          |    |    |    |    |
|-------|-------|-------|-------|------|----------|----------|----------|----|----|----|----|
| 0.07  | -0.02 | -0.03 | 0.03  | 0.12 | 0.73     | 0.31     | 0.28     | NA | NA | NA | NA |
| 0.07  | 0.16  | -0.03 | 0.03  | 0.13 | 0.0011   | 0.04     | 0.099    | NA | NA | NA | NA |
| -0.05 | -0.02 | -0.07 | -0.01 | 0.13 | 0.62     | 0.02     | 0.83     | NA | NA | NA | NA |
| 0.04  | 0.04  | -0.05 | -0.01 | 0.13 | 0.086    | 2.10E-05 | 0.42     | NA | NA | NA | NA |
| 0.09  | 0.08  | -0.06 | -0.05 | 0.13 | 0.12     | 0.04     | 0.077    | NA | NA | NA | NA |
| 0.04  | 0.09  | -0.05 | 0.03  | 0.13 | 0.00048  | 0.00076  | 0.11     | NA | NA | NA | NA |
| 0.4   | 0.06  | -0.08 | -0.05 | 0.13 | 0.53     | 0.098    | 0.21     | NA | NA | NA | NA |
| 0.11  | 0.13  | -0.07 | 0.04  | 0.13 | 0.096    | 0.0017   | 0.3      | NA | NA | NA | NA |
| -0.2  | -0.21 | -0.05 | -0.06 | 0.14 | 0.16     | 0.11     | 0.088    | NA | NA | NA | NA |
| 0.17  | -0.06 | -0.01 | 0.05  | 0.14 | 0.56     | 0.74     | 0.14     | NA | NA | NA | NA |
| 0.18  | 0.2   | 0.07  | 0.02  | 0.14 | 0.062    | 0.16     | 0.84     | NA | NA | NA | NA |
| 0.06  | 0.25  | -0.02 | 0.05  | 0.14 | 6.30E-05 | 0.54     | 0.16     | NA | NA | NA | NA |
| -0.12 | 0.19  | -0.15 | -0.09 | 0.14 | 0.089    | 0.0013   | 0.12     | NA | NA | NA | NA |
| 0.93  | 0.01  | -0.14 | 0.27  | 0.14 | 1        | 3.20E-05 | 2.90E-09 | NA | NA | NA | NA |
| 0.03  | 0.04  | -0.01 | 0     | 0.14 | 0.0052   | 0.6      | 0.95     | NA | NA | NA | NA |
| 0.14  | 0.1   | -0.08 | 0.04  | 0.14 | 0.062    | 0.026    | 0.33     | NA | NA | NA | NA |
| 0.07  | 0.06  | -0.03 | 0.05  | 0.14 | 0.11     | 0.11     | 0.0076   | NA | NA | NA | NA |
| 0.07  | -0.01 | -0.05 | 0.01  | 0.14 | 0.77     | 0.036    | 0.71     | NA | NA | NA | NA |
| 0.12  | 0.08  | -0.04 | 0     | 0.14 | 0.085    | 0.029    | 1        | NA | NA | NA | NA |
| -0.09 | -0.02 | -0.02 | 0.04  | 0.14 | 0.84     | 0.44     | 0.057    | NA | NA | NA | NA |
| 0.22  | 0.14  | -0.08 | -0.02 | 0.14 | 0.32     | 0.0088   | 0.72     | NA | NA | NA | NA |
| 0.06  | 0.04  | 0.01  | 0.06  | 0.14 | 0.27     | 0.61     | 0.0015   | NA | NA | NA | NA |
| 0.11  | -0.04 | -0.08 | -0.06 | 0.15 | 0.62     | 0.009    | 0.097    | NA | NA | NA | NA |
| -0.07 | 0.13  | -0.04 | 0.01  | 0.15 | 0.091    | 0.12     | 0.71     | NA | NA | NA | NA |
| 0.06  | 0.09  | -0.06 | 0.01  | 0.15 | 0.074    | 0.017    | 0.71     | NA | NA | NA | NA |
| 0.03  | 0.04  | -0.05 | 0     | 0.15 | 0.043    | 0.0017   | 0.98     | NA | NA | NA | NA |
| 0.21  | 0.05  | 0.01  | 0.07  | 0.15 | 0.86     | 0.86     | 0.0047   | NA | NA | NA | NA |
| 0.05  | 0.01  | -0.04 | 0.02  | 0.15 | 0.59     | 0.0095   | 0.37     | NA | NA | NA | NA |
| 0.04  | 0.09  | -0.02 | 0.01  | 0.15 | 0.00012  | 0.07     | 0.49     | NA | NA | NA | NA |
| 0.04  | 0.12  | -0.02 | -0.07 | 0.16 | 0.0027   | 0.46     | 0.0021   | NA | NA | NA | NA |

|       |       |       |       |      |          |          |          |    |    |    |    |
|-------|-------|-------|-------|------|----------|----------|----------|----|----|----|----|
| 0.07  | 0.07  | -0.05 | -0.04 | 0.16 | 0.61     | 0.098    | 0.38     | NA | NA | NA | NA |
| 0.05  | 0.03  | -0.06 | -0.03 | 0.16 | 0.27     | 0.017    | 0.25     | NA | NA | NA | NA |
| 0.52  | 0.52  | NA    | NA    | 0.16 | 0.49     | NA       | NA       | NA | NA | NA | NA |
| 0.12  | 0.09  | -0.18 | -0.16 | 0.17 | 0.038    | 8.80E-09 | 7.70E-06 | NA | NA | NA | NA |
| 0.06  | 0.04  | -0.08 | -0.02 | 0.17 | 0.23     | 2.10E-06 | 0.36     | NA | NA | NA | NA |
| 0.06  | 0.03  | -0.07 | -0.04 | 0.17 | 0.65     | 0.0011   | 0.16     | NA | NA | NA | NA |
| 0.11  | -0.03 | 0     | 0.02  | 0.17 | 0.72     | 0.99     | 0.33     | NA | NA | NA | NA |
| -0.07 | -0.05 | -0.03 | -0.08 | 0.18 | 0.29     | 0.41     | 0.057    | NA | NA | NA | NA |
| 0.15  | 0.2   | 0     | 0.01  | 0.18 | 0.00014  | 1        | 0.81     | NA | NA | NA | NA |
| 0.07  | 0.02  | -0.05 | -0.03 | 0.18 | 0.65     | 0.00075  | 0.15     | NA | NA | NA | NA |
| 0.08  | 0.08  | -0.05 | -0.01 | 0.18 | 0.076    | 0.021    | 0.89     | NA | NA | NA | NA |
| 0.09  | 0.01  | -0.02 | 0.03  | 0.18 | 0.76     | 0.45     | 0.12     | NA | NA | NA | NA |
| 0.08  | 0.03  | -0.04 | -0.07 | 0.18 | 0.51     | 0.045    | 0.001    | NA | NA | NA | NA |
| 0.18  | -0.1  | 0     | 0.01  | 0.19 | 0.016    | 0.91     | 0.56     | NA | NA | NA | NA |
| 0.16  | 0.04  | -0.09 | -0.04 | 0.19 | 0.81     | 0.028    | 0.46     | NA | NA | NA | NA |
| 0.04  | 0.03  | -0.02 | 0.01  | 0.19 | 0.39     | 0.15     | 0.66     | NA | NA | NA | NA |
| 0.11  | 0.61  | -0.08 | -0.12 | 0.19 | 0.011    | 0.18     | 0.00088  | NA | NA | NA | NA |
| 0.11  | -0.14 | -0.08 | -0.07 | 0.19 | 0.066    | 0.00088  | 0.013    | NA | NA | NA | NA |
| 0.24  | 0.2   | -0.02 | 0     | 0.2  | 0.35     | 0.51     | 1        | NA | NA | NA | NA |
| -0.12 | -0.11 | -0.04 | 0.02  | 0.2  | 0.066    | 0.048    | 0.51     | NA | NA | NA | NA |
| 0.04  | 0.09  | 0     | 0.05  | 0.2  | 0.11     | 1        | 0.021    | NA | NA | NA | NA |
| 0.03  | 0.07  | -0.04 | 0.05  | 0.2  | 0.0032   | 0.0025   | 0.0017   | NA | NA | NA | NA |
| -0.05 | -0.03 | -0.07 | -0.02 | 0.2  | 0.56     | 7.00E-06 | 0.2      | NA | NA | NA | NA |
| 0.91  | -0.03 | 0     | -0.02 | 0.2  | 0.95     | 1        | 0.57     | NA | NA | NA | NA |
| 0.05  | 0.03  | 0     | 0.05  | 0.21 | 0.36     | 0.81     | 7.00E-04 | NA | NA | NA | NA |
| 0.09  | 0.02  | -0.01 | 0.05  | 0.21 | 0.72     | 0.55     | 0.064    | NA | NA | NA | NA |
| -0.19 | -0.12 | -0.15 | -0.02 | 0.21 | 0.27     | 0.00056  | 0.72     | NA | NA | NA | NA |
| 0.05  | 0.12  | -0.02 | 0.02  | 0.21 | 6.90E-06 | 0.35     | 0.18     | NA | NA | NA | NA |
| -0.14 | 0.06  | -0.02 | 0.08  | 0.22 | 0.66     | 0.29     | 0.0018   | NA | NA | NA | NA |
| 0.09  | -0.04 | -0.08 | 0.03  | 0.22 | 0.25     | 0.031    | 0.6      | NA | NA | NA | NA |



|       |       |       |       |      |          |          |          |    |    |    |    |
|-------|-------|-------|-------|------|----------|----------|----------|----|----|----|----|
| 0.09  | -0.04 | -0.01 | 0.03  | 0.22 | 0.27     | 0.74     | 0.2      | NA | NA | NA | NA |
| 0.27  | 0.21  | -0.04 | 0.17  | 0.22 | 0.31     | 0.29     | 0.00068  | NA | NA | NA | NA |
| 0.04  | 0.13  | -0.04 | -0.05 | 0.22 | 4.20E-06 | 0.01     | 0.00014  | NA | NA | NA | NA |
| -0.03 | -0.03 | -0.04 | -0.02 | 0.22 | 0.065    | 0.0017   | 0.14     | NA | NA | NA | NA |
| 0.06  | -0.05 | -0.08 | -0.04 | 0.23 | 0.16     | 5.20E-06 | 0.059    | NA | NA | NA | NA |
| 0.08  | -0.14 | -0.04 | -0.01 | 0.23 | 1.30E-05 | 0.032    | 0.69     | NA | NA | NA | NA |
| 0.04  | 0.07  | -0.02 | 0.02  | 0.23 | 0.033    | 0.38     | 0.17     | NA | NA | NA | NA |
| 0.04  | 0.09  | -0.06 | -0.01 | 0.23 | 0.0015   | 0.00036  | 0.56     | NA | NA | NA | NA |
| 0.1   | 0.05  | 0.01  | 0.11  | 0.24 | 0.62     | 0.96     | 0.094    | NA | NA | NA | NA |
| 0.05  | 0.05  | 0     | -0.01 | 0.24 | 0.047    | 0.78     | 0.54     | NA | NA | NA | NA |
| 0.21  | NA    | -0.05 | -0.06 | 0.24 | NA       | 0.057    | 0.068    | NA | NA | NA | NA |
| 0.05  | -0.01 | -0.04 | 0     | 0.24 | 0.68     | 0.036    | 1        | NA | NA | NA | NA |
| 0.04  | 0.04  | -0.02 | -0.02 | 0.24 | 0.093    | 0.19     | 0.24     | NA | NA | NA | NA |
| 0.08  | 0.12  | -0.06 | 0.02  | 0.24 | 0.25     | 0.0073   | 0.59     | NA | NA | NA | NA |
| 0.13  | 0.15  | -0.1  | -0.07 | 0.25 | 0.13     | 8.20E-05 | 0.017    | NA | NA | NA | NA |
| 0.03  | -0.02 | -0.05 | -0.02 | 0.25 | 0.22     | 0.0068   | 0.43     | NA | NA | NA | NA |
| 0.06  | 0.09  | -0.08 | -0.01 | 0.25 | 0.23     | 0.00052  | 0.83     | NA | NA | NA | NA |
| -0.04 | 0.03  | -0.06 | 0.02  | 0.25 | 0.37     | 0.0086   | 0.32     | NA | NA | NA | NA |
| 0.22  | 0.02  | -0.01 | 0.07  | 0.25 | 0.98     | 0.89     | 0.2      | NA | NA | NA | NA |
| 0.04  | 0.08  | -0.06 | 0.01  | 0.25 | 8.00E-04 | 8.10E-08 | 0.69     | NA | NA | NA | NA |
| -0.08 | -0.03 | -0.04 | 0.04  | 0.25 | 0.56     | 0.098    | 0.17     | NA | NA | NA | NA |
| -0.16 | -0.15 | 0.03  | 0.11  | 0.25 | 0.095    | 1        | 0.65     | NA | NA | NA | NA |
| -0.13 | -0.03 | 0.01  | 0.17  | 0.26 | 0.97     | 0.79     | 3.70E-09 | NA | NA | NA | NA |
| -0.06 | -0.01 | -0.02 | 0.05  | 0.26 | 0.96     | 0.64     | 0.068    | NA | NA | NA | NA |
| 0.12  | 0.11  | 0.06  | 0.03  | 0.26 | 0.047    | 0.38     | 0.68     | NA | NA | NA | NA |
| 0.06  | 0.11  | 0.03  | 0.06  | 0.26 | 0.0012   | 0.39     | 0.035    | NA | NA | NA | NA |
| 0.88  | 0.02  | -0.08 | 0     | 0.26 | 0.85     | 0.012    | 1        | NA | NA | NA | NA |
| 0.05  | -0.02 | 0.01  | 0.05  | 0.27 | 0.64     | 0.45     | 0.0039   | NA | NA | NA | NA |
| 0.09  | 0.18  | 0.09  | 0.15  | 0.27 | 0.012    | 0.011    | 7.70E-05 | NA | NA | NA | NA |
| 0.03  | 0     | -0.03 | 0.04  | 0.27 | 1        | 0.013    | 0.03     | NA | NA | NA | NA |

|       |       |       |       |      |          |          |          |    |    |    |    |
|-------|-------|-------|-------|------|----------|----------|----------|----|----|----|----|
| 0.09  | 0.17  | -0.01 | 0.08  | 0.27 | 6.70E-06 | 0.92     | 0.084    | NA | NA | NA | NA |
| 0.06  | 0.15  | 0.02  | 0.05  | 0.27 | 0.0011   | 0.33     | 0.016    | NA | NA | NA | NA |
| 0.06  | 0.01  | -0.07 | -0.05 | 0.27 | 1        | 0.048    | 0.17     | NA | NA | NA | NA |
| -0.02 | 0.01  | -0.03 | -0.02 | 0.27 | 0.65     | 0.0019   | 0.1      | NA | NA | NA | NA |
| 0.28  | -0.07 | -0.02 | 0     | 0.27 | 0.68     | 0.89     | 1        | NA | NA | NA | NA |
| -0.03 | 0.04  | -0.03 | 0.05  | 0.27 | 0.3      | 0.0081   | 0.0035   | NA | NA | NA | NA |
| 0.06  | 0.12  | -0.06 | 0     | 0.27 | 0.044    | 0.074    | 1        | NA | NA | NA | NA |
| 0.11  | 0.3   | -0.15 | -0.08 | 0.27 | 0.0033   | 0.0063   | 0.29     | NA | NA | NA | NA |
| 0.13  | 0.11  | -0.11 | 0.06  | 0.28 | 0.48     | 4.20E-05 | 0.26     | NA | NA | NA | NA |
| 0.39  | NA    | -0.17 | -0.03 | 0.28 | NA       | 0.089    | 0.66     | NA | NA | NA | NA |
| 0.07  | -0.04 | -0.05 | 0.01  | 0.28 | 0.28     | 0.013    | 0.81     | NA | NA | NA | NA |
| 0.07  | 0.09  | -0.04 | -0.05 | 0.28 | 0.038    | 0.15     | 0.16     | NA | NA | NA | NA |
| -0.05 | 0.1   | -0.05 | -0.01 | 0.28 | 0.0055   | 0.0027   | 0.71     | NA | NA | NA | NA |
| 0.05  | 0.06  | 0.02  | 0.03  | 0.28 | 0.0031   | 0.44     | 0.16     | NA | NA | NA | NA |
| 0.04  | -0.01 | -0.04 | 0.02  | 0.29 | 0.9      | 0.11     | 0.26     | NA | NA | NA | NA |
| 0.1   | -0.05 | -0.16 | -0.04 | 0.29 | 0.64     | 4.30E-08 | 0.35     | NA | NA | NA | NA |
| 0.02  | 0.07  | -0.03 | 0.07  | 0.29 | 0.00011  | 0.0028   | 2.90E-07 | NA | NA | NA | NA |
| 0.08  | 0.15  | -0.05 | 0.09  | 0.29 | 0.48     | 0.22     | 0.082    | NA | NA | NA | NA |
| -0.92 | -0.83 | 0.13  | 0.24  | 0.29 | 0.61     | 0.34     | 0.1      | NA | NA | NA | NA |
| -0.02 | 0.01  | -0.03 | 0.01  | 0.29 | 0.63     | 0.043    | 0.68     | NA | NA | NA | NA |
| 0.03  | 0.1   | -0.02 | 0.02  | 0.3  | 6.90E-05 | 0.19     | 0.11     | NA | NA | NA | NA |
| -0.08 | 0.05  | 0.04  | 0.04  | 0.3  | 0.079    | 0.052    | 0.06     | NA | NA | NA | NA |
| -0.02 | -0.03 | 0.02  | 0.03  | 0.31 | 0.14     | 0.068    | 0.00016  | NA | NA | NA | NA |
| 0.05  | 0.23  | -0.06 | -0.03 | 0.31 | 1.30E-08 | 0.024    | 0.2      | NA | NA | NA | NA |
| 0.1   | 0.15  | -0.06 | -0.07 | 0.31 | 0.017    | 0.049    | 0.02     | NA | NA | NA | NA |
| 0.08  | 0.11  | 0.04  | 0.06  | 0.31 | 0.035    | 0.11     | 0.0058   | NA | NA | NA | NA |
| -0.1  | 0.03  | -0.04 | 0.07  | 0.31 | 1        | 0.64     | 0.44     | NA | NA | NA | NA |
| 0.03  | 0.03  | -0.04 | 0.01  | 0.32 | 0.68     | 0.029    | 0.63     | NA | NA | NA | NA |
| 0.02  | 0.03  | -0.03 | 0     | 0.32 | 0.12     | 0.004    | 0.78     | NA | NA | NA | NA |
| 0.09  | 0.11  | -0.01 | 0.03  | 0.32 | 0.19     | 0.88     | 0.61     | NA | NA | NA | NA |

|       |       |       |       |      |         |          |          |    |    |    |    |
|-------|-------|-------|-------|------|---------|----------|----------|----|----|----|----|
| 0.03  | -0.05 | -0.03 | 0.02  | 0.32 | 0.01    | 0.024    | 0.2      | NA | NA | NA | NA |
| 0.03  | 0.03  | -0.07 | 0     | 0.33 | 0.41    | 0.0063   | 0.94     | NA | NA | NA | NA |
| 0.07  | 0.02  | 0.07  | 0.1   | 0.33 | 0.93    | 0.13     | 0.037    | NA | NA | NA | NA |
| 0.04  | 0.14  | 0.05  | 0.12  | 0.33 | 0.00017 | 0.019    | 6.00E-08 | NA | NA | NA | NA |
| 0.05  | -0.01 | -0.05 | -0.03 | 0.33 | 0.81    | 0.0013   | 0.035    | NA | NA | NA | NA |
| -0.06 | 0.05  | -0.04 | 0.01  | 0.33 | 0.58    | 0.032    | 0.81     | NA | NA | NA | NA |
| 0.09  | 0.12  | -0.03 | -0.03 | 0.33 | 0.02    | 0.079    | 0.21     | NA | NA | NA | NA |
| 0.04  | 0.03  | -0.06 | 0.01  | 0.34 | 0.1     | 0.00016  | 0.82     | NA | NA | NA | NA |
| -0.03 | -0.08 | -0.01 | 0     | 0.34 | 0.00097 | 0.7      | 0.98     | NA | NA | NA | NA |
| 0.07  | -0.07 | -0.06 | -0.09 | 0.34 | 0.074   | 4.10E-05 | 3.10E-09 | NA | NA | NA | NA |
| 0.04  | 0.16  | -0.09 | 0     | 0.34 | 0.00065 | 2.20E-06 | 1        | NA | NA | NA | NA |
| 0.18  | -0.04 | -0.02 | 0.04  | 0.34 | 0.63    | 0.65     | 0.29     | NA | NA | NA | NA |
| 0.03  | -0.04 | 0.02  | 0.09  | 0.34 | 0.3     | 0.24     | 4.30E-08 | NA | NA | NA | NA |
| 0.04  | 0.1   | -0.06 | 0.01  | 0.35 | 0.0027  | 6.00E-06 | 0.43     | NA | NA | NA | NA |
| 0.01  | 0     | -0.05 | -0.04 | 0.35 | 1       | 1.00E-04 | 0.0018   | NA | NA | NA | NA |
| 0.03  | 0.06  | -0.05 | 0.01  | 0.35 | 0.0053  | 0.00086  | 0.64     | NA | NA | NA | NA |
| 0.02  | 0.05  | -0.06 | 0     | 0.35 | 0.12    | 0.00034  | 0.91     | NA | NA | NA | NA |
| 0.03  | 0.07  | -0.01 | 0.04  | 0.35 | 0.016   | 0.68     | 0.081    | NA | NA | NA | NA |
| 0.15  | 0.88  | -0.06 | -0.09 | 0.35 | 0.012   | 0.11     | 0.016    | NA | NA | NA | NA |
| -0.13 | -0.03 | -0.04 | -0.05 | 0.35 | 1       | 0.19     | 0.28     | NA | NA | NA | NA |
| 0.02  | 0.03  | -0.05 | 0.01  | 0.35 | 0.27    | 7.20E-05 | 0.35     | NA | NA | NA | NA |
| 0.02  | 0.05  | -0.03 | -0.02 | 0.36 | 0.058   | 0.17     | 0.22     | NA | NA | NA | NA |
| 0.04  | 0.04  | 0.01  | 0.08  | 0.36 | 0.58    | 0.82     | 0.00079  | NA | NA | NA | NA |
| 0.04  | -0.01 | 0.02  | 0.05  | 0.36 | 0.84    | 0.31     | 0.0049   | NA | NA | NA | NA |
| -0.05 | -0.01 | -0.03 | 0     | 0.36 | 0.87    | 0.18     | 1        | NA | NA | NA | NA |
| -0.05 | 0.17  | -0.09 | 0.14  | 0.36 | 0.00014 | 0.0082   | 0.0011   | NA | NA | NA | NA |
| -0.02 | 0.13  | 0.01  | 0.05  | 0.36 | 0.00011 | 0.72     | 0.0065   | NA | NA | NA | NA |
| 0.06  | 0.02  | -0.04 | 0.06  | 0.37 | 0.68    | 0.017    | 0.00029  | NA | NA | NA | NA |
| 0.03  | 0.02  | -0.02 | 0.04  | 0.37 | 0.26    | 0.13     | 0.014    | NA | NA | NA | NA |
| -0.08 | 0.16  | -0.05 | 0.07  | 0.37 | 0.02    | 0.19     | 0.1      | NA | NA | NA | NA |

|       |       |       |       |      |          |          |          |    |    |    |    |
|-------|-------|-------|-------|------|----------|----------|----------|----|----|----|----|
| 0.11  | 0.21  | -0.09 | 0.09  | 0.37 | 0.0055   | 0.044    | 0.11     | NA | NA | NA | NA |
| 0.02  | 0.03  | -0.01 | -0.02 | 0.37 | 0.16     | 0.47     | 0.059    | NA | NA | NA | NA |
| 0.1   | 0.02  | -0.05 | -0.02 | 0.37 | 0.69     | 0.061    | 0.63     | NA | NA | NA | NA |
| 0.11  | 0.17  | -0.09 | 0.03  | 0.38 | 0.037    | 0.0032   | 0.49     | NA | NA | NA | NA |
| 0.05  | 0.03  | 0.01  | 0.07  | 0.38 | 0.37     | 0.83     | 0.00049  | NA | NA | NA | NA |
| 0.03  | -0.01 | -0.07 | -0.04 | 0.38 | 0.76     | 0.00023  | 0.025    | NA | NA | NA | NA |
| 0.02  | 0.04  | -0.01 | -0.02 | 0.38 | 0.035    | 0.47     | 0.13     | NA | NA | NA | NA |
| 0.14  | 0.04  | -0.06 | 0.03  | 0.38 | 0.9      | 0.052    | 0.39     | NA | NA | NA | NA |
| 0.05  | 0.18  | -0.05 | -0.02 | 0.38 | 0.00044  | 0.0065   | 0.29     | NA | NA | NA | NA |
| 0.06  | 0.25  | -0.05 | 0.01  | 0.39 | 7.50E-06 | 0.012    | 0.76     | NA | NA | NA | NA |
| 0.06  | 0     | -0.06 | -0.03 | 0.39 | 1        | 0.013    | 0.18     | NA | NA | NA | NA |
| 0.18  | 0.55  | -0.01 | 0     | 0.39 | 0.013    | 0.58     | 1        | NA | NA | NA | NA |
| 0.05  | 0.02  | 0.01  | 0.02  | 0.39 | 0.49     | 0.91     | 0.31     | NA | NA | NA | NA |
| 0.07  | 0.04  | -0.01 | 0.03  | 0.39 | 0.97     | 0.82     | 0.34     | NA | NA | NA | NA |
| -0.25 | 0     | 0.14  | 0.07  | 0.4  | 1        | 0.17     | 0.78     | NA | NA | NA | NA |
| 0.03  | 0.15  | 0.01  | 0.07  | 0.4  | 0.0013   | 0.56     | 0.00077  | NA | NA | NA | NA |
| 0.07  | 0.13  | -0.02 | -0.01 | 0.4  | 0.048    | 0.38     | 0.76     | NA | NA | NA | NA |
| -0.16 | -0.13 | -0.18 | -0.15 | 0.4  | 0.36     | 0.0053   | 0.055    | NA | NA | NA | NA |
| -0.02 | 0.1   | -0.07 | 0.03  | 0.4  | 0.0018   | 0.0043   | 0.2      | NA | NA | NA | NA |
| 0.03  | 0.02  | -0.01 | -0.01 | 0.4  | 0.49     | 0.63     | 0.48     | NA | NA | NA | NA |
| 0.04  | 0.03  | -0.09 | -0.14 | 0.4  | 0.54     | 0.0034   | 1.90E-05 | NA | NA | NA | NA |
| -0.07 | -0.01 | -0.07 | 0     | 0.41 | 1        | 0.0069   | 1        | NA | NA | NA | NA |
| 0.04  | 0.07  | -0.1  | 0.08  | 0.41 | 0.12     | 4.60E-05 | 0.007    | NA | NA | NA | NA |
| 0.03  | 0.05  | 0     | 0.01  | 0.42 | 0.19     | 0.85     | 0.46     | NA | NA | NA | NA |
| 0.14  | -0.12 | 0     | 0.01  | 0.42 | 0.23     | 1        | 0.59     | NA | NA | NA | NA |
| -0.12 | -0.05 | 0.1   | 0.87  | 0.42 | 0.66     | 0.4      | 8.60E-07 | NA | NA | NA | NA |
| 0.03  | -0.01 | -0.04 | -0.03 | 0.42 | 0.94     | 0.0071   | 0.071    | NA | NA | NA | NA |
| 0.04  | 0.22  | 0     | 0.15  | 0.42 | 4.50E-06 | 1        | 2.70E-08 | NA | NA | NA | NA |
| 0.19  | -0.2  | -0.14 | -0.04 | 0.42 | 0.2      | 1.70E-06 | 0.31     | NA | NA | NA | NA |
| 0.03  | 0.04  | -0.05 | 0.02  | 0.42 | 0.1      | 0.0011   | 0.3      | NA | NA | NA | NA |

|       |       |       |       |      |          |          |          |    |    |    |    |
|-------|-------|-------|-------|------|----------|----------|----------|----|----|----|----|
| -0.05 | -0.11 | -0.04 | -0.03 | 0.42 | 0.0064   | 0.0088   | 0.089    | NA | NA | NA | NA |
| 0.03  | 0.09  | -0.03 | -0.04 | 0.43 | 0.0014   | 0.037    | 0.01     | NA | NA | NA | NA |
| 0.02  | -0.04 | -0.04 | 0     | 0.43 | 0.051    | 0.0084   | 1        | NA | NA | NA | NA |
| 0.24  | -0.05 | -0.08 | -0.04 | 0.43 | 0.44     | 0.001    | 0.2      | NA | NA | NA | NA |
| 0.02  | 0.06  | -0.01 | 0.01  | 0.43 | 0.0023   | 0.33     | 0.25     | NA | NA | NA | NA |
| 0.01  | 0.03  | -0.03 | 0     | 0.43 | 0.087    | 0.014    | 0.77     | NA | NA | NA | NA |
| -0.03 | 0.01  | 0.05  | 0.05  | 0.43 | 1        | 0.029    | 0.05     | NA | NA | NA | NA |
| -0.03 | 0.04  | -0.03 | -0.01 | 0.43 | 0.13     | 0.032    | 0.48     | NA | NA | NA | NA |
| 0.09  | 0.43  | -0.11 | 0     | 0.43 | 9.80E-05 | 0.00033  | 1        | NA | NA | NA | NA |
| 0.07  | 0.19  | -0.03 | -0.02 | 0.44 | 0.023    | 0.35     | 0.65     | NA | NA | NA | NA |
| 0.02  | 0.07  | -0.04 | -0.02 | 0.44 | 0.03     | 0.0016   | 0.16     | NA | NA | NA | NA |
| -0.03 | -0.03 | 0     | 0.01  | 0.44 | 0.37     | 0.96     | 0.83     | NA | NA | NA | NA |
| 0.06  | 0.16  | -0.01 | 0.1   | 0.45 | 0.036    | 0.65     | 0.00049  | NA | NA | NA | NA |
| 0.14  | -0.02 | -0.06 | 0.01  | 0.45 | 1        | 0.0076   | 0.85     | NA | NA | NA | NA |
| 0.07  | 0.02  | -0.05 | 0.06  | 0.45 | 0.88     | 0.17     | 0.041    | NA | NA | NA | NA |
| -0.04 | -0.02 | -0.02 | 0     | 0.46 | 0.74     | 0.32     | 0.87     | NA | NA | NA | NA |
| 0.04  | 0.13  | -0.02 | 0.04  | 0.46 | 1.30E-07 | 0.26     | 0.021    | NA | NA | NA | NA |
| -0.19 | -0.22 | -0.02 | -0.03 | 0.46 | 0.56     | 0.71     | 0.45     | NA | NA | NA | NA |
| -0.03 | 0.06  | -0.03 | 0     | 0.46 | 0.18     | 0.036    | 1        | NA | NA | NA | NA |
| -0.06 | -0.08 | -0.02 | -0.01 | 0.47 | 0.25     | 0.56     | 0.71     | NA | NA | NA | NA |
| -0.11 | -0.06 | -0.02 | 0.08  | 0.47 | 0.8      | 0.46     | 0.015    | NA | NA | NA | NA |
| -0.03 | 0.01  | -0.07 | 0.08  | 0.47 | 1        | 0.013    | 0.018    | NA | NA | NA | NA |
| -0.03 | -0.01 | -0.01 | 0.02  | 0.47 | 0.76     | 0.47     | 0.053    | NA | NA | NA | NA |
| 0.06  | 0.05  | -0.06 | -0.01 | 0.47 | 0.46     | 0.043    | 0.9      | NA | NA | NA | NA |
| 0.02  | 0.03  | -0.06 | -0.04 | 0.47 | 0.11     | 6.70E-07 | 5.00E-04 | NA | NA | NA | NA |
| -0.02 | 0.01  | -0.04 | -0.01 | 0.47 | 0.86     | 0.003    | 0.41     | NA | NA | NA | NA |
| -0.02 | -0.02 | -0.06 | 0.01  | 0.47 | 0.4      | 2.40E-07 | 0.35     | NA | NA | NA | NA |
| 0.07  | 0.09  | -0.05 | 0.07  | 0.48 | 0.27     | 0.088    | 0.04     | NA | NA | NA | NA |
| 0.79  | 0.79  | -0.04 | 0.08  | 0.49 | 0.49     | 0.58     | 0.089    | NA | NA | NA | NA |
| 0.08  | 0.08  | -0.02 | 0.04  | 0.49 | 0.5      | 0.83     | 0.75     | NA | NA | NA | NA |

|       |       |       |       |      |          |          |          |    |    |    |    |
|-------|-------|-------|-------|------|----------|----------|----------|----|----|----|----|
| -0.06 | 0.1   | 0     | 0.04  | 0.49 | 0.37     | 0.97     | 0.11     | NA | NA | NA | NA |
| 0.03  | 0.06  | 0.02  | 0.11  | 0.49 | 0.02     | 0.66     | 0.00096  | NA | NA | NA | NA |
| 0.05  | 0.14  | -0.03 | 0.02  | 0.49 | 0.0015   | 0.046    | 0.29     | NA | NA | NA | NA |
| -0.1  | 0.52  | -0.04 | 0.03  | 0.49 | 0.061    | 0.41     | 0.55     | NA | NA | NA | NA |
| 0.03  | -0.01 | -0.03 | 0.02  | 0.5  | 0.93     | 0.06     | 0.26     | NA | NA | NA | NA |
| 0.02  | 0.02  | 0     | -0.03 | 0.5  | 0.66     | 1        | 0.058    | NA | NA | NA | NA |
| 0.03  | 0.04  | -0.01 | 0.03  | 0.5  | 0.15     | 0.56     | 0.35     | NA | NA | NA | NA |
| 0.03  | 0.04  | -0.15 | -0.03 | 0.5  | 0.41     | 1.30E-06 | 0.32     | NA | NA | NA | NA |
| 0.06  | 0.05  | 0.12  | 0.35  | 0.5  | 0.58     | 0.27     | 0.00062  | NA | NA | NA | NA |
| -0.07 | 0.2   | 0.02  | 0.09  | 0.5  | 0.028    | 0.74     | 0.059    | NA | NA | NA | NA |
| 0.02  | 0.04  | -0.02 | 0.04  | 0.5  | 0.11     | 0.26     | 0.02     | NA | NA | NA | NA |
| 0.03  | 0.07  | -0.06 | -0.05 | 0.51 | 0.012    | 0.0062   | 0.013    | NA | NA | NA | NA |
| 0.03  | 0.01  | -0.06 | -0.01 | 0.51 | 0.92     | 0.0016   | 0.65     | NA | NA | NA | NA |
| -0.14 | -0.14 | 0     | 0.02  | 0.51 | 0.23     | 0.97     | 0.55     | NA | NA | NA | NA |
| -0.05 | -0.03 | 0     | 0.02  | 0.51 | 0.51     | 1        | 0.26     | NA | NA | NA | NA |
| -0.07 | 0.17  | -0.14 | -0.09 | 0.51 | 0.3      | 1.40E-05 | 0.0038   | NA | NA | NA | NA |
| 0.06  | 0.26  | -0.09 | -0.01 | 0.52 | 0.00094  | 0.014    | 0.95     | NA | NA | NA | NA |
| -0.03 | 0.02  | -0.06 | -0.03 | 0.52 | 0.6      | 0.00022  | 0.04     | NA | NA | NA | NA |
| 0.03  | 0.04  | -0.07 | -0.01 | 0.52 | 0.54     | 0.0082   | 0.72     | NA | NA | NA | NA |
| -0.02 | -0.06 | -0.07 | 0.03  | 0.52 | 0.0067   | 0.00022  | 0.13     | NA | NA | NA | NA |
| -0.05 | -0.02 | -0.04 | -0.06 | 0.52 | 0.99     | 0.025    | 0.0018   | NA | NA | NA | NA |
| 0.05  | 0.01  | -0.03 | 0.08  | 0.52 | 0.89     | 0.027    | 1.20E-05 | NA | NA | NA | NA |
| 0.05  | 0.2   | 0.05  | 0.08  | 0.52 | 0.00024  | 0.12     | 0.0031   | NA | NA | NA | NA |
| 0.03  | 0     | -0.04 | -0.01 | 0.52 | 1        | 0.15     | 0.64     | NA | NA | NA | NA |
| 0.02  | -0.04 | -0.04 | -0.02 | 0.52 | 0.031    | 0.00093  | 0.11     | NA | NA | NA | NA |
| 0.03  | 0.13  | -0.07 | -0.05 | 0.53 | 7.90E-05 | 0.015    | 0.088    | NA | NA | NA | NA |
| 0.04  | 0     | -0.01 | -0.04 | 0.53 | 1        | 0.86     | 0.1      | NA | NA | NA | NA |
| -0.04 | 0.15  | -0.06 | -0.01 | 0.53 | 0.013    | 0.0077   | 0.52     | NA | NA | NA | NA |
| 0.03  | 0.2   | -0.09 | -0.02 | 0.53 | 4.00E-04 | 0.00086  | 0.6      | NA | NA | NA | NA |
| -0.03 | 0.07  | -0.05 | -0.03 | 0.53 | 0.12     | 0.0099   | 0.13     | NA | NA | NA | NA |

|       |       |       |       |      |          |          |          |    |    |    |    |
|-------|-------|-------|-------|------|----------|----------|----------|----|----|----|----|
| -0.06 | 0.4   | -0.05 | -0.01 | 0.53 | 0.00013  | 0.08     | 0.88     | NA | NA | NA | NA |
| -0.07 | -0.06 | -0.02 | -0.01 | 0.53 | 0.23     | 0.41     | 0.71     | NA | NA | NA | NA |
| -0.04 | 0.74  | -0.04 | -0.03 | 0.53 | 3.60E-08 | 0.18     | 0.5      | NA | NA | NA | NA |
| 0.03  | 0.1   | -0.04 | -0.06 | 0.53 | 0.053    | 0.052    | 0.011    | NA | NA | NA | NA |
| 0.06  | 0.01  | -0.01 | 0.01  | 0.54 | 1        | 0.8      | 0.98     | NA | NA | NA | NA |
| 0.05  | 0.1   | 0.04  | 0.1   | 0.54 | 0.075    | 0.11     | 0.00028  | NA | NA | NA | NA |
| 0.03  | -0.01 | -0.02 | 0.05  | 0.54 | 0.81     | 0.36     | 0.0048   | NA | NA | NA | NA |
| 0.04  | 0.1   | -0.03 | 0.03  | 0.54 | 0.031    | 0.065    | 0.14     | NA | NA | NA | NA |
| 0.02  | 0.02  | -0.03 | -0.02 | 0.54 | 0.28     | 0.009    | 0.22     | NA | NA | NA | NA |
| 0.02  | 0.06  | -0.03 | 0     | 0.54 | 0.013    | 0.00088  | 0.78     | NA | NA | NA | NA |
| -0.41 | -0.41 | -0.07 | 0.01  | 0.55 | 0.58     | 0.067    | 0.85     | NA | NA | NA | NA |
| 0.07  | 0     | -0.13 | -0.04 | 0.55 | 1        | 0.00029  | 0.49     | NA | NA | NA | NA |
| 0.05  | 0.06  | -0.05 | -0.01 | 0.55 | 0.12     | 0.053    | 0.87     | NA | NA | NA | NA |
| 0.04  | 0.16  | 0     | 0.03  | 0.55 | 0.033    | 0.99     | 0.39     | NA | NA | NA | NA |
| 0.02  | 0.01  | -0.01 | 0.03  | 0.55 | 0.57     | 0.47     | 0.13     | NA | NA | NA | NA |
| 0.5   | 0.5   | 0.18  | 0.05  | 0.56 | 0.0056   | 0.5      | 0.86     | NA | NA | NA | NA |
| 0.12  | 0.26  | 0.02  | -0.01 | 0.56 | 7.80E-05 | 0.34     | 0.81     | NA | NA | NA | NA |
| 0.12  | 0.1   | -0.05 | 0.18  | 0.56 | 0.18     | 0.2      | 0.22     | NA | NA | NA | NA |
| 0.07  | -0.02 | -0.03 | -0.01 | 0.56 | 0.84     | 0.21     | 0.69     | NA | NA | NA | NA |
| 0.04  | -0.04 | -0.03 | 0.07  | 0.56 | 0.35     | 0.075    | 8.20E-05 | NA | NA | NA | NA |
| 0.02  | 0     | 0.01  | 0.03  | 0.56 | 1        | 0.8      | 0.41     | NA | NA | NA | NA |
| 0.02  | -0.04 | -0.04 | 0.04  | 0.56 | 0.2      | 0.00087  | 0.0073   | NA | NA | NA | NA |
| 0.06  | -0.02 | -0.03 | 0.04  | 0.57 | 1        | 0.32     | 0.16     | NA | NA | NA | NA |
| 0.01  | 0.01  | -0.04 | -0.01 | 0.57 | 0.91     | 0.038    | 0.69     | NA | NA | NA | NA |
| -0.01 | 0.02  | 0.04  | -0.01 | 0.58 | 0.34     | 0.26     | 0.83     | NA | NA | NA | NA |
| 0.04  | 0.15  | -0.12 | -0.03 | 0.58 | 0.0015   | 8.90E-08 | 0.32     | NA | NA | NA | NA |
| -0.67 | 0     | -0.13 | NA    | 0.58 | 1        | 0.26     | NA       | NA | NA | NA | NA |
| 0.11  | 0.33  | -0.07 | -0.01 | 0.58 | 0.015    | 0.28     | 0.96     | NA | NA | NA | NA |
| 0.03  | 0.06  | -0.07 | -0.01 | 0.58 | 0.29     | 0.0021   | 0.86     | NA | NA | NA | NA |
| 0.01  | 0.04  | -0.01 | 0.06  | 0.59 | 0.053    | 0.57     | 2.70E-07 | NA | NA | NA | NA |

|       |       |       |       |      |         |          |          |    |    |    |    |
|-------|-------|-------|-------|------|---------|----------|----------|----|----|----|----|
| 0.12  | -0.07 | -0.05 | -0.01 | 0.59 | 0.81    | 0.045    | 0.69     | NA | NA | NA | NA |
| -0.06 | 0.1   | 0.01  | 0.06  | 0.59 | 0.11    | 0.55     | 0.0015   | NA | NA | NA | NA |
| 0.03  | -0.02 | -0.04 | -0.04 | 0.59 | 0.61    | 0.043    | 0.02     | NA | NA | NA | NA |
| 0.02  | 0.01  | 0.02  | 0.05  | 0.59 | 0.72    | 0.37     | 0.031    | NA | NA | NA | NA |
| -0.06 | -0.06 | -0.12 | -0.1  | 0.59 | 0.62    | 0.035    | 0.26     | NA | NA | NA | NA |
| 0.02  | 0.02  | -0.03 | -0.01 | 0.59 | 0.42    | 0.084    | 0.5      | NA | NA | NA | NA |
| 0.08  | 0.02  | 0.04  | 0.02  | 0.59 | 1       | 0.16     | 0.57     | NA | NA | NA | NA |
| -0.07 | -0.12 | -0.13 | -0.05 | 0.59 | 0.43    | 0.022    | 0.61     | NA | NA | NA | NA |
| -0.04 | -0.05 | -0.01 | 0.01  | 0.59 | 0.2     | 0.45     | 0.64     | NA | NA | NA | NA |
| -0.11 | -0.02 | -0.1  | 0     | 0.59 | 1       | 0.029    | 1        | NA | NA | NA | NA |
| 0.03  | 0.02  | -0.03 | -0.01 | 0.6  | 0.48    | 0.085    | 0.48     | NA | NA | NA | NA |
| 0.03  | -0.05 | -0.01 | 0.06  | 0.6  | 0.23    | 0.54     | 8.70E-05 | NA | NA | NA | NA |
| 0.03  | 0.14  | -0.04 | 0.07  | 0.61 | 0.014   | 0.17     | 0.0076   | NA | NA | NA | NA |
| 0.03  | 0.01  | -0.01 | 0.02  | 0.61 | 0.91    | 0.61     | 0.29     | NA | NA | NA | NA |
| 0.02  | 0.07  | -0.01 | 0.01  | 0.61 | 0.017   | 0.23     | 0.28     | NA | NA | NA | NA |
| 0.06  | -0.01 | -0.04 | 0.04  | 0.61 | 0.93    | 0.11     | 0.18     | NA | NA | NA | NA |
| 0.03  | -0.05 | -0.05 | 0.06  | 0.62 | 0.12    | 0.053    | 0.042    | NA | NA | NA | NA |
| -0.09 | -0.02 | -0.01 | 0     | 0.62 | 0.71    | 0.57     | 0.86     | NA | NA | NA | NA |
| 0.01  | 0.03  | -0.01 | -0.03 | 0.62 | 0.065   | 0.61     | 0.013    | NA | NA | NA | NA |
| 0.05  | 0.04  | -0.04 | -0.01 | 0.62 | 0.34    | 0.21     | 0.95     | NA | NA | NA | NA |
| 0.05  | 0.03  | -0.03 | -0.02 | 0.62 | 0.83    | 0.27     | 0.54     | NA | NA | NA | NA |
| 0.02  | 0.01  | -0.02 | 0.01  | 0.62 | 0.66    | 0.23     | 0.69     | NA | NA | NA | NA |
| -0.04 | -0.07 | -0.11 | 0.12  | 0.62 | 0.36    | 5.20E-05 | 0.0025   | NA | NA | NA | NA |
| -0.04 | 0.09  | -0.01 | 0     | 0.63 | 0.19    | 0.74     | 0.99     | NA | NA | NA | NA |
| 0.02  | 0     | 0.05  | 0     | 0.63 | 0.98    | 0.039    | 0.89     | NA | NA | NA | NA |
| -0.05 | -0.02 | -0.04 | 0.07  | 0.64 | 0.95    | 0.037    | 0.0025   | NA | NA | NA | NA |
| 0.05  | 0.04  | -0.08 | -0.03 | 0.64 | 1       | 4.40E-05 | 0.33     | NA | NA | NA | NA |
| -0.11 | -0.19 | -0.06 | -0.03 | 0.64 | 0.14    | 0.071    | 0.38     | NA | NA | NA | NA |
| 0.01  | 0.07  | -0.01 | 0     | 0.65 | 0.00025 | 0.56     | 0.89     | NA | NA | NA | NA |
| -0.03 | 0.18  | -0.06 | 0     | 0.65 | 0.027   | 0.037    | 1        | NA | NA | NA | NA |



|       |       |       |       |      |        |          |        |    |    |    |    |
|-------|-------|-------|-------|------|--------|----------|--------|----|----|----|----|
| 0.02  | -0.02 | -0.04 | 0.05  | 0.65 | 0.18   | 0.0088   | 0.009  | NA | NA | NA | NA |
| 0.04  | 0.04  | 0.07  | 0.09  | 0.65 | 0.85   | 0.12     | 0.2    | NA | NA | NA | NA |
| -0.07 | -0.14 | -0.02 | -0.05 | 0.66 | 0.089  | 0.75     | 0.17   | NA | NA | NA | NA |
| -0.02 | -0.07 | -0.02 | 0.02  | 0.66 | 0.01   | 0.22     | 0.18   | NA | NA | NA | NA |
| 0.16  | 0.49  | -0.25 | -0.11 | 0.66 | 0.0062 | 0.0022   | 0.51   | NA | NA | NA | NA |
| 0.71  | -0.19 | -0.02 | 0.04  | 0.66 | 0.0057 | 0.78     | 0.23   | NA | NA | NA | NA |
| -0.07 | 0.05  | -0.06 | 0.01  | 0.66 | 0.12   | 0.0077   | 0.77   | NA | NA | NA | NA |
| -0.02 | 0.08  | -0.04 | 0.01  | 0.67 | 0.12   | 0.13     | 0.91   | NA | NA | NA | NA |
| -0.02 | 0.06  | -0.06 | 0.03  | 0.67 | 0.053  | 0.00017  | 0.14   | NA | NA | NA | NA |
| 0.02  | 0.05  | 0     | 0.04  | 0.67 | 0.16   | 0.91     | 0.012  | NA | NA | NA | NA |
| -0.01 | 0.04  | -0.03 | 0.06  | 0.67 | 0.28   | 0.33     | 0.027  | NA | NA | NA | NA |
| 0.06  | 0.09  | -0.06 | -0.07 | 0.67 | 0.13   | 0.48     | 0.45   | NA | NA | NA | NA |
| 0.12  | 0.12  | -0.09 | 0.04  | 0.67 | 0.38   | 0.047    | 0.51   | NA | NA | NA | NA |
| 0.02  | 0     | -0.07 | 0.02  | 0.67 | 1      | 1.20E-07 | 0.18   | NA | NA | NA | NA |
| 0.07  | 0.01  | 0.04  | 0.12  | 0.68 | 1      | 0.39     | 0.0058 | NA | NA | NA | NA |
| -0.01 | -0.01 | -0.04 | -0.04 | 0.68 | 0.8    | 0.13     | 0.053  | NA | NA | NA | NA |
| 0.73  | 0.73  | -0.08 | -0.24 | 0.68 | 0.21   | 0.35     | 0.012  | NA | NA | NA | NA |
| 0.09  | 0     | -0.06 | 0.05  | 0.68 | 1      | 0.24     | 0.46   | NA | NA | NA | NA |
| -0.02 | -0.01 | 0.02  | -0.03 | 0.68 | 0.95   | 0.33     | 0.2    | NA | NA | NA | NA |
| 0.01  | 0.06  | -0.04 | 0.02  | 0.68 | 0.0071 | 0.0016   | 0.13   | NA | NA | NA | NA |
| 0.05  | -0.04 | 0     | 0.03  | 0.68 | 0.38   | 0.93     | 0.19   | NA | NA | NA | NA |
| 0.08  | -0.05 | 0.01  | 0.01  | 0.68 | 0.76   | 0.97     | 0.92   | NA | NA | NA | NA |
| 0.05  | -0.02 | 0.06  | 0.03  | 0.69 | 0.81   | 0.11     | 0.3    | NA | NA | NA | NA |
| -0.03 | -0.06 | -0.12 | -0.05 | 0.69 | 0.17   | 1.20E-08 | 0.075  | NA | NA | NA | NA |
| 0.04  | -0.03 | 0.01  | 0.02  | 0.69 | 0.88   | 0.87     | 0.6    | NA | NA | NA | NA |
| 0.02  | 0.03  | -0.07 | -0.02 | 0.69 | 0.36   | 4.20E-06 | 0.24   | NA | NA | NA | NA |
| 0.02  | 0     | -0.02 | 0.04  | 0.69 | 1      | 0.49     | 0.02   | NA | NA | NA | NA |
| 0.02  | 0.02  | -0.05 | 0.05  | 0.69 | 0.57   | 0.014    | 0.01   | NA | NA | NA | NA |
| -0.01 | -0.02 | -0.02 | 0.01  | 0.69 | 0.52   | 0.19     | 0.53   | NA | NA | NA | NA |
| -0.08 | -0.11 | -0.09 | -0.19 | 0.7  | 0.1    | 0.11     | 0.0027 | NA | NA | NA | NA |

|       |       |       |       |      |          |          |          |    |    |    |    |
|-------|-------|-------|-------|------|----------|----------|----------|----|----|----|----|
| -0.05 | 0.17  | -0.07 | 0.01  | 0.7  | 0.00022  | 0.00012  | 0.69     | NA | NA | NA | NA |
| 0.04  | 0.04  | 0.01  | -0.02 | 0.7  | 0.84     | 0.9      | 0.73     | NA | NA | NA | NA |
| -0.13 | -0.25 | -0.18 | 0     | 0.7  | 0.4      | 0.49     | 1        | NA | NA | NA | NA |
| -0.06 | 0     | -0.1  | 0.05  | 0.71 | 1        | 0.00042  | 0.3      | NA | NA | NA | NA |
| -0.05 | -0.05 | -0.05 | -0.06 | 0.71 | 0.42     | 0.009    | 0.0034   | NA | NA | NA | NA |
| 0.03  | -0.04 | 0.08  | 0.01  | 0.71 | 0.29     | 0.0061   | 0.89     | NA | NA | NA | NA |
| 0.03  | 0.15  | -0.01 | 0.04  | 0.71 | 0.011    | 0.73     | 0.1      | NA | NA | NA | NA |
| 0.7   | NA    | 0.03  | 0.14  | 0.72 | NA       | 1        | 0.044    | NA | NA | NA | NA |
| 0.01  | 0.01  | -0.01 | 0.02  | 0.72 | 0.69     | 0.62     | 0.21     | NA | NA | NA | NA |
| 0.02  | 0.03  | -0.04 | 0.02  | 0.72 | 0.33     | 0.027    | 0.4      | NA | NA | NA | NA |
| 0.03  | 0     | -0.03 | -0.01 | 0.72 | 1        | 0.072    | 0.65     | NA | NA | NA | NA |
| -0.05 | -0.17 | 0.06  | 0.05  | 0.73 | 0.1      | 0.23     | 0.5      | NA | NA | NA | NA |
| -0.03 | -0.02 | -0.09 | -0.08 | 0.73 | 0.91     | 1.70E-05 | 0.00076  | NA | NA | NA | NA |
| -0.03 | 0.03  | -0.05 | 0.03  | 0.73 | 0.58     | 0.12     | 0.33     | NA | NA | NA | NA |
| -0.02 | 0.21  | 0.03  | -0.01 | 0.73 | 0.00045  | 0.6      | 0.83     | NA | NA | NA | NA |
| 0.03  | 0.11  | -0.01 | 0.07  | 0.73 | 0.045    | 0.81     | 0.13     | NA | NA | NA | NA |
| -0.07 | -0.01 | 0.04  | 0.12  | 0.74 | 1        | 0.035    | 2.80E-06 | NA | NA | NA | NA |
| 0.12  | 0.04  | -0.05 | 0.08  | 0.74 | 0.95     | 0.24     | 0.5      | NA | NA | NA | NA |
| 0.01  | 0     | 0.01  | 0.01  | 0.74 | 1        | 0.73     | 0.75     | NA | NA | NA | NA |
| 0.02  | 0.15  | 0     | 0.06  | 0.74 | 0.00065  | 0.87     | 0.012    | NA | NA | NA | NA |
| -0.08 | -0.15 | -0.03 | 0.03  | 0.75 | 0.25     | 0.37     | 0.59     | NA | NA | NA | NA |
| 0.07  | 0.1   | -0.02 | 0.1   | 0.75 | 0.13     | 0.34     | 0.0013   | NA | NA | NA | NA |
| 0.01  | 0.12  | -0.01 | 0.03  | 0.75 | 3.00E-07 | 0.28     | 0.022    | NA | NA | NA | NA |
| 0.02  | -0.03 | -0.03 | -0.03 | 0.75 | 0.48     | 0.13     | 0.18     | NA | NA | NA | NA |
| 0.03  | 0.19  | -0.03 | 0.01  | 0.75 | 0.0051   | 0.37     | 0.89     | NA | NA | NA | NA |
| -0.08 | -0.06 | -0.23 | -0.21 | 0.75 | 0.55     | 0.004    | 0.03     | NA | NA | NA | NA |
| -0.03 | 0.05  | 0.06  | -0.04 | 0.75 | 0.29     | 0.16     | 0.2      | NA | NA | NA | NA |
| -0.03 | 0.07  | -0.06 | 0     | 0.75 | 0.13     | 0.022    | 1        | NA | NA | NA | NA |
| 0.03  | 0.01  | -0.04 | -0.03 | 0.76 | 0.73     | 0.095    | 0.22     | NA | NA | NA | NA |
| -0.01 | 0.01  | -0.02 | -0.01 | 0.76 | 0.72     | 0.45     | 0.62     | NA | NA | NA | NA |

|       |       |       |       |      |          |          |          |    |    |    |    |
|-------|-------|-------|-------|------|----------|----------|----------|----|----|----|----|
| 0.03  | 0.1   | -0.04 | 0.15  | 0.76 | 0.032    | 0.095    | 4.60E-05 | NA | NA | NA | NA |
| -0.02 | 0.21  | 0.02  | 0.04  | 0.76 | 0.014    | 0.44     | 0.12     | NA | NA | NA | NA |
| 0.22  | 0     | -0.15 | 0.12  | 0.76 | 1        | 5.40E-05 | 0.025    | NA | NA | NA | NA |
| -0.01 | 0.04  | -0.01 | 0.04  | 0.76 | 0.13     | 0.68     | 0.0095   | NA | NA | NA | NA |
| 0.01  | 0.08  | -0.02 | -0.02 | 0.77 | 0.0094   | 0.29     | 0.33     | NA | NA | NA | NA |
| 0.11  | 0.1   | -0.07 | 0.06  | 0.77 | 0.33     | 0.077    | 0.28     | NA | NA | NA | NA |
| -0.02 | -0.04 | -0.04 | -0.01 | 0.78 | 0.26     | 0.011    | 0.86     | NA | NA | NA | NA |
| 0.02  | 0.56  | -0.09 | 0.01  | 0.79 | 4.00E-08 | 0.0019   | 0.72     | NA | NA | NA | NA |
| 0.02  | 0.12  | 0.01  | 0.04  | 0.79 | 5.00E-04 | 0.67     | 0.036    | NA | NA | NA | NA |
| -0.05 | -0.18 | 0.04  | 0.08  | 0.79 | 0.018    | 0.28     | 0.024    | NA | NA | NA | NA |
| 0.37  | 0.37  | -0.06 | 0.01  | 0.79 | 0.11     | 0.088    | 0.83     | NA | NA | NA | NA |
| 0.33  | 0.04  | 0.05  | 0.04  | 0.79 | 0.73     | 0.39     | 0.4      | NA | NA | NA | NA |
| 0.05  | 0.16  | -0.05 | -0.01 | 0.79 | 0.0016   | 0.046    | 0.97     | NA | NA | NA | NA |
| 0.04  | -0.07 | -0.2  | -0.07 | 0.79 | 0.3      | 1.90E-05 | 0.2      | NA | NA | NA | NA |
| 0.06  | 0     | -0.01 | 0.06  | 0.8  | 1        | 0.73     | 0.00096  | NA | NA | NA | NA |
| 0.16  | 0.19  | -0.01 | -0.05 | 0.8  | 0.0066   | 0.86     | 0.19     | NA | NA | NA | NA |
| -0.03 | 0.08  | -0.02 | 0.07  | 0.8  | 0.25     | 0.66     | 0.054    | NA | NA | NA | NA |
| 0.02  | 0.05  | -0.04 | -0.02 | 0.8  | 0.045    | 0.023    | 0.28     | NA | NA | NA | NA |
| -0.01 | -0.02 | -0.03 | 0     | 0.8  | 0.43     | 0.071    | 0.98     | NA | NA | NA | NA |
| -0.12 | 0.02  | -0.07 | 0.04  | 0.81 | 1        | 0.011    | 0.83     | NA | NA | NA | NA |
| 0.63  | 0.63  | -0.04 | 0.05  | 0.81 | 0.81     | 0.6      | 0.49     | NA | NA | NA | NA |
| 0.04  | -0.01 | 0.03  | 0.06  | 0.81 | 1        | 0.8      | 0.44     | NA | NA | NA | NA |
| 0.04  | 0.14  | -0.11 | 0.03  | 0.81 | 0.4      | 0.013    | 0.7      | NA | NA | NA | NA |
| -0.09 | -0.07 | -0.05 | -0.04 | 0.82 | 0.78     | 0.13     | 0.34     | NA | NA | NA | NA |
| -0.07 | 0.04  | -0.12 | -0.11 | 0.82 | 1        | 0.14     | 0.2      | NA | NA | NA | NA |
| 0.02  | 0.03  | 0     | 0     | 0.82 | 0.43     | 0.92     | 1        | NA | NA | NA | NA |
| -0.03 | 0     | -0.14 | -0.09 | 0.82 | 1        | 4.80E-05 | 0.0021   | NA | NA | NA | NA |
| -0.01 | -0.01 | -0.06 | 0.01  | 0.82 | 0.46     | 2.30E-07 | 0.53     | NA | NA | NA | NA |
| 0.08  | 0.09  | -0.01 | 0.16  | 0.83 | 0.37     | 0.82     | 2.30E-06 | NA | NA | NA | NA |
| -0.1  | -0.06 | -0.1  | -0.12 | 0.83 | 0.93     | 0.011    | 0.0099   | NA | NA | NA | NA |

|       |       |       |       |      |          |          |          |    |    |    |    |
|-------|-------|-------|-------|------|----------|----------|----------|----|----|----|----|
| 0.02  | -0.03 | -0.02 | 0.05  | 0.83 | 0.61     | 0.42     | 0.074    | NA | NA | NA | NA |
| 0.13  | NA    | -0.12 | 0.02  | 0.83 | NA       | 0.076    | 1        | NA | NA | NA | NA |
| 0.03  | 0.09  | -0.04 | 0.05  | 0.83 | 0.21     | 0.008    | 0.019    | NA | NA | NA | NA |
| -0.02 | -0.05 | -0.03 | 0     | 0.83 | 0.49     | 0.25     | 0.92     | NA | NA | NA | NA |
| -0.04 | 0.36  | -0.02 | -0.02 | 0.84 | 0.082    | 0.59     | 0.55     | NA | NA | NA | NA |
| 0.02  | 0.08  | -0.04 | -0.02 | 0.84 | 0.02     | 0.027    | 0.38     | NA | NA | NA | NA |
| 0.01  | -0.03 | -0.07 | -0.01 | 0.85 | 0.4      | 5.70E-05 | 0.43     | NA | NA | NA | NA |
| 0.16  | -0.07 | -0.08 | 0.08  | 0.85 | 0.66     | 0.018    | 0.16     | NA | NA | NA | NA |
| 0.25  | -0.01 | -0.11 | 0.05  | 0.85 | 1        | 0.001    | 0.26     | NA | NA | NA | NA |
| -0.05 | NA    | -0.03 | 0.06  | 0.85 | NA       | 0.39     | 0.08     | NA | NA | NA | NA |
| -0.01 | 0.07  | -0.01 | 0.05  | 0.85 | 0.008    | 0.12     | 1.80E-06 | NA | NA | NA | NA |
| -0.11 | 0     | 0.03  | -0.04 | 0.85 | 1        | 0.5      | 0.31     | NA | NA | NA | NA |
| -0.01 | -0.03 | -0.04 | 0.02  | 0.85 | 0.046    | 0.00069  | 0.16     | NA | NA | NA | NA |
| -0.01 | 0.14  | -0.04 | 0     | 0.85 | 1.30E-06 | 0.0017   | 0.73     | NA | NA | NA | NA |
| 0.02  | -0.03 | -0.02 | 0.04  | 0.85 | 0.46     | 1        | 0.46     | NA | NA | NA | NA |
| 0.02  | 0.12  | -0.04 | 0.11  | 0.85 | 0.00022  | 0.039    | 0.00015  | NA | NA | NA | NA |
| 0.01  | 0.01  | -0.06 | 0.02  | 0.86 | 0.97     | 0.0046   | 0.41     | NA | NA | NA | NA |
| -0.02 | 0.03  | -0.06 | -0.02 | 0.86 | 0.62     | 0.00034  | 0.5      | NA | NA | NA | NA |
| -0.04 | 0.13  | -0.03 | 0.09  | 0.86 | 0.24     | 0.39     | 0.039    | NA | NA | NA | NA |
| 0.09  | 0.36  | 0.29  | 0.16  | 0.86 | 0.23     | 0.0068   | 0.024    | NA | NA | NA | NA |
| 0.22  | 0.2   | -0.06 | 0.02  | 0.86 | 0.22     | 0.023    | 0.58     | NA | NA | NA | NA |
| 0.01  | 0.12  | -0.04 | 0     | 0.86 | 0.0022   | 0.046    | 1        | NA | NA | NA | NA |
| 0.07  | NA    | 0     | 0.04  | 0.87 | NA       | 1        | 0.57     | NA | NA | NA | NA |
| 0.03  | -0.01 | -0.03 | -0.04 | 0.87 | 1        | 0.2      | 0.081    | NA | NA | NA | NA |
| 0.32  | NA    | -0.13 | 0.17  | 0.88 | NA       | 0.0044   | 0.11     | NA | NA | NA | NA |
| -0.02 | 0.06  | -0.04 | 0     | 0.88 | 0.22     | 0.039    | 0.98     | NA | NA | NA | NA |
| -0.01 | 0.01  | -0.04 | 0.02  | 0.88 | 1        | 0.029    | 0.35     | NA | NA | NA | NA |
| -0.1  | 0.42  | -0.11 | 0.05  | 0.88 | 0.073    | 0.0072   | 0.38     | NA | NA | NA | NA |
| 0.04  | -0.14 | -0.01 | 0.1   | 0.88 | 0.024    | 0.51     | 4.00E-05 | NA | NA | NA | NA |
| 0.01  | 0.06  | -0.07 | -0.01 | 0.88 | 0.019    | 3.10E-06 | 0.83     | NA | NA | NA | NA |

|       |       |       |       |      |          |          |          |    |    |    |    |
|-------|-------|-------|-------|------|----------|----------|----------|----|----|----|----|
| -0.01 | -0.02 | -0.01 | 0.06  | 0.89 | 0.57     | 0.75     | 0.0074   | NA | NA | NA | NA |
| -0.03 | -0.1  | -0.04 | 0.01  | 0.89 | 0.14     | 0.21     | 0.74     | NA | NA | NA | NA |
| -0.03 | -0.03 | -0.01 | -0.01 | 0.89 | 0.38     | 0.86     | 0.79     | NA | NA | NA | NA |
| -0.02 | 0.01  | -0.01 | -0.05 | 0.9  | 0.89     | 0.67     | 0.042    | NA | NA | NA | NA |
| 0.02  | -0.02 | -0.01 | 0.12  | 0.9  | 0.8      | 0.58     | 1.50E-06 | NA | NA | NA | NA |
| 0.02  | 0.48  | -0.08 | 0     | 0.9  | 7.90E-07 | 0.012    | 1        | NA | NA | NA | NA |
| -0.01 | 0.08  | -0.07 | -0.03 | 0.9  | 0.016    | 0.012    | 0.35     | NA | NA | NA | NA |
| 0.02  | 0.04  | -0.02 | -0.02 | 0.9  | 0.5      | 0.55     | 0.65     | NA | NA | NA | NA |
| -0.03 | -0.05 | 0.05  | 0     | 0.9  | 0.46     | 0.34     | 1        | NA | NA | NA | NA |
| 0.01  | 0.06  | 0.01  | 0.07  | 0.9  | 0.18     | 0.78     | 0.01     | NA | NA | NA | NA |
| -0.01 | 0.03  | -0.07 | -0.07 | 0.9  | 0.61     | 0.0011   | 0.00041  | NA | NA | NA | NA |
| -0.01 | 0.04  | -0.01 | 0.02  | 0.91 | 0.065    | 0.54     | 0.24     | NA | NA | NA | NA |
| 0.01  | 0.2   | -0.01 | 0.1   | 0.91 | 0.00045  | 0.71     | 0.0057   | NA | NA | NA | NA |
| 0.03  | 0.01  | 0.03  | 0.05  | 0.91 | 0.93     | 0.49     | 0.071    | NA | NA | NA | NA |
| 0.01  | -0.04 | -0.08 | 0.02  | 0.91 | 0.22     | 3.20E-06 | 0.26     | NA | NA | NA | NA |
| -0.01 | -0.04 | -0.09 | -0.02 | 0.92 | 0.21     | 2.10E-05 | 0.43     | NA | NA | NA | NA |
| -0.1  | 0.35  | -0.02 | 0.23  | 0.92 | 0.059    | 0.93     | 0.039    | NA | NA | NA | NA |
| 0.15  | 0.18  | -0.02 | 0.03  | 0.92 | 0.0043   | 0.24     | 0.14     | NA | NA | NA | NA |
| -0.02 | -0.06 | -0.02 | 0.05  | 0.92 | 0.13     | 0.22     | 0.0073   | NA | NA | NA | NA |
| -0.02 | 0.09  | -0.01 | -0.01 | 0.93 | 0.058    | 0.8      | 0.7      | NA | NA | NA | NA |
| -0.01 | -0.03 | -0.06 | -0.03 | 0.93 | 0.18     | 0.0023   | 0.31     | NA | NA | NA | NA |
| -0.02 | -0.02 | 0     | 0.02  | 0.93 | 1        | 1        | 0.55     | NA | NA | NA | NA |
| 0.02  | 0.08  | -0.01 | 0.05  | 0.93 | 0.12     | 0.61     | 0.0013   | NA | NA | NA | NA |
| 0.03  | -0.02 | -0.04 | 0     | 0.93 | 0.59     | 0.29     | 1        | NA | NA | NA | NA |
| 0.02  | 0.01  | -0.02 | 0.03  | 0.93 | 0.93     | 0.53     | 0.37     | NA | NA | NA | NA |
| 0.01  | 0.06  | -0.04 | 0     | 0.93 | 0.055    | 0.044    | 0.96     | NA | NA | NA | NA |
| -0.01 | 0     | -0.08 | -0.09 | 0.93 | 1        | 0.00049  | 7.80E-06 | NA | NA | NA | NA |
| 0.06  | 0.09  | -0.04 | 0.01  | 0.94 | 0.28     | 0.16     | 0.74     | NA | NA | NA | NA |
| 0.01  | 0.06  | 0.01  | 0.04  | 0.94 | 0.19     | 0.8      | 0.011    | NA | NA | NA | NA |
| -0.02 | -0.03 | 0.06  | -0.02 | 0.94 | 0.77     | 0.23     | 0.62     | NA | NA | NA | NA |

|       |       |       |       |      |          |          |          |    |    |    |    |
|-------|-------|-------|-------|------|----------|----------|----------|----|----|----|----|
| -0.25 | -0.5  | -0.1  | -0.09 | 0.94 | 0.32     | 0.024    | 0.039    | NA | NA | NA | NA |
| 0.02  | 0.06  | -0.01 | 0.05  | 0.94 | 0.16     | 0.37     | 0.0016   | NA | NA | NA | NA |
| 0.02  | 0.24  | 0.02  | 0.03  | 0.94 | 2.40E-05 | 0.44     | 0.26     | NA | NA | NA | NA |
| -0.01 | 0.04  | 0     | 0     | 0.94 | 0.32     | 0.9      | 0.82     | NA | NA | NA | NA |
| 0.07  | 0.12  | 0.02  | 0.06  | 0.95 | 0.083    | 1        | 0.62     | NA | NA | NA | NA |
| 0.01  | 0.19  | -0.04 | -0.03 | 0.95 | 0.00053  | 0.025    | 0.061    | NA | NA | NA | NA |
| 0.06  | 0.1   | -0.19 | -0.14 | 0.95 | 0.76     | 0.0031   | 0.17     | NA | NA | NA | NA |
| 0.01  | 0.29  | -0.02 | -0.04 | 0.96 | 9.90E-07 | 0.39     | 0.023    | NA | NA | NA | NA |
| 0.01  | 0.03  | 0.01  | -0.01 | 0.96 | 0.46     | 0.78     | 0.6      | NA | NA | NA | NA |
| -0.02 | -0.09 | -0.05 | -0.03 | 0.96 | 0.038    | 0.02     | 0.27     | NA | NA | NA | NA |
| -0.02 | NA    | -0.02 | 0.05  | 0.96 | NA       | 0.76     | 0.38     | NA | NA | NA | NA |
| 0     | -0.02 | -0.05 | 0     | 0.96 | 0.34     | 0.00019  | 0.8      | NA | NA | NA | NA |
| 0.12  | 0.14  | -0.02 | -0.12 | 0.97 | 0.18     | 0.7      | 0.00084  | NA | NA | NA | NA |
| -0.03 | NA    | -0.09 | -0.01 | 0.97 | NA       | 0.00047  | 0.79     | NA | NA | NA | NA |
| 0     | 0     | 0     | -0.01 | 0.97 | 1        | 1        | 0.63     | NA | NA | NA | NA |
| -0.01 | 0     | -0.04 | -0.03 | 0.97 | 1        | 0.0075   | 0.062    | NA | NA | NA | NA |
| 0.01  | 0.1   | -0.03 | 0.1   | 0.97 | 0.17     | 0.25     | 0.00011  | NA | NA | NA | NA |
| 0.02  | 0.06  | -0.06 | 0.02  | 0.98 | 0.14     | 0.0033   | 0.34     | NA | NA | NA | NA |
| 0     | 0.04  | -0.02 | 0.07  | 0.98 | 0.22     | 0.26     | 7.30E-05 | NA | NA | NA | NA |
| 0.01  | -0.01 | -0.03 | -0.04 | 0.98 | 0.88     | 0.02     | 0.007    | NA | NA | NA | NA |
| 0.01  | 0.03  | -0.01 | 0.05  | 0.98 | 0.73     | 0.73     | 0.036    | NA | NA | NA | NA |
| 0.02  | 0.11  | 0.02  | 0.05  | 0.98 | 0.14     | 0.69     | 0.039    | NA | NA | NA | NA |
| -0.04 | -0.02 | -0.03 | -0.01 | 0.99 | 1        | 0.26     | 0.81     | NA | NA | NA | NA |
| -0.01 | -0.01 | -0.02 | 0     | 0.99 | 0.83     | 0.49     | 0.88     | NA | NA | NA | NA |
| 0.02  | 0.17  | 0.01  | 0.03  | 0.99 | 0.0067   | 0.6      | 0.17     | NA | NA | NA | NA |
| 0     | 0.07  | -0.04 | 0.06  | 0.99 | 0.014    | 0.028    | 0.005    | NA | NA | NA | NA |
| 0.01  | 0.08  | 0.03  | 0.04  | 0.99 | 0.029    | 0.15     | 0.017    | NA | NA | NA | NA |
| 0.02  | 0.04  | -0.1  | -0.04 | 0.99 | 0.52     | 1.90E-05 | 0.16     | NA | NA | NA | NA |
| 0.02  | -0.01 | -0.07 | -0.04 | 0.99 | 0.98     | 0.00054  | 0.088    | NA | NA | NA | NA |
| 0     | 0.04  | -0.06 | -0.04 | 1    | 0.47     | 0.00041  | 0.069    | NA | NA | NA | NA |

|       |       |       |       |   |          |          |         |    |    |    |    |
|-------|-------|-------|-------|---|----------|----------|---------|----|----|----|----|
| 0     | 0.04  | -0.06 | 0.02  | 1 | 0.27     | 6.00E-04 | 0.6     | NA | NA | NA | NA |
| 0.02  | -0.06 | -0.11 | -0.05 | 1 | 0.26     | 0.00087  | 0.31    | NA | NA | NA | NA |
| -0.01 | -0.07 | -0.15 | -0.13 | 1 | 0.7      | 3.60E-08 | 0.001   | NA | NA | NA | NA |
| 0     | 0.09  | 0.08  | 0.06  | 1 | 0.77     | 0.036    | 0.031   | NA | NA | NA | NA |
| 0.01  | -0.05 | -0.03 | 0.02  | 1 | 0.58     | 0.51     | 0.66    | NA | NA | NA | NA |
| 0.13  | NA    | -0.07 | 0.05  | 1 | NA       | 0.12     | 0.52    | NA | NA | NA | NA |
| 0.01  | 0.04  | 0.03  | 0.06  | 1 | 0.42     | 0.37     | 0.026   | NA | NA | NA | NA |
| 0     | -0.02 | 0.1   | 0.01  | 1 | 0.55     | 0.0024   | 0.73    | NA | NA | NA | NA |
| -0.02 | 0.26  | -0.07 | 0.02  | 1 | 0.012    | 0.0028   | 0.59    | NA | NA | NA | NA |
| 0.25  | 0.75  | 0.09  | -0.02 | 1 | 0.12     | 0.54     | 0.78    | NA | NA | NA | NA |
| 0.02  | 0.47  | -0.01 | 0.11  | 1 | 1.20E-06 | 0.72     | 0.00026 | NA | NA | NA | NA |
| 0.02  | 0.07  | -0.01 | 0.03  | 1 | 0.34     | 0.37     | 0.11    | NA | NA | NA | NA |
| 0.03  | 0.05  | 0     | 0     | 1 | 0.64     | 1        | 1       | NA | NA | NA | NA |
| -0.02 | -0.04 | -0.07 | 0.07  | 1 | 0.31     | 0.00011  | 0.023   | NA | NA | NA | NA |
| -0.5  | -0.8  | -0.01 | 0.31  | 1 | 0.7      | 1        | 0.0046  | NA | NA | NA | NA |
| -0.01 | -0.04 | -0.07 | 0.02  | 1 | 0.15     | 0.0029   | 0.49    | NA | NA | NA | NA |
| -0.01 | -0.06 | -0.02 | 0     | 1 | 0.34     | 0.48     | 1       | NA | NA | NA | NA |
| 0     | -0.02 | -0.07 | -0.02 | 1 | 0.87     | 0.0016   | 0.58    | NA | NA | NA | NA |
| -0.04 | 0.03  | -0.12 | -0.02 | 1 | 0.85     | 0.0076   | 0.78    | NA | NA | NA | NA |
| 0     | -0.02 | -0.14 | -0.06 | 1 | 0.8      | 0.00034  | 0.17    | NA | NA | NA | NA |
| 0.03  | 0.02  | -0.05 | -0.01 | 1 | 0.95     | 0.032    | 0.67    | NA | NA | NA | NA |
| 0.01  | 0.09  | -0.08 | -0.01 | 1 | 0.018    | 1.40E-05 | 0.76    | NA | NA | NA | NA |
| 0.12  | -0.04 | -0.04 | -0.06 | 1 | 0.42     | 0.18     | 0.029   | NA | NA | NA | NA |
| 0.09  | 0.09  | -0.33 | -0.27 | 1 | 0.7      | 1.30E-06 | 0.075   | NA | NA | NA | NA |
| 0.01  | 0.04  | 0     | -0.01 | 1 | 0.72     | 1        | 1       | NA | NA | NA | NA |
| 0     | -0.01 | -0.05 | 0     | 1 | 0.93     | 0.24     | 1       | NA | NA | NA | NA |
| -0.02 | 0.05  | -0.15 | -0.06 | 1 | 0.85     | 1.50E-06 | 0.11    | NA | NA | NA | NA |
| 0.11  | 0.02  | -0.16 | 0     | 1 | 1        | 0.0025   | 1       | NA | NA | NA | NA |
| 0.01  | -0.05 | -0.04 | 0.07  | 1 | 0.58     | 0.073    | 0.012   | NA | NA | NA | NA |
| 0     | -0.01 | 0.01  | 0.08  | 1 | 0.91     | 0.88     | 0.00056 | NA | NA | NA | NA |

|       |       |       |       |   |          |          |          |    |    |    |    |
|-------|-------|-------|-------|---|----------|----------|----------|----|----|----|----|
| 0.01  | -0.03 | -0.04 | -0.01 | 1 | 0.31     | 0.096    | 0.53     | NA | NA | NA | NA |
| 0.02  | 0.03  | -0.03 | 0.02  | 1 | 0.86     | 0.66     | 0.92     | NA | NA | NA | NA |
| -0.05 | -0.01 | -0.04 | 0.05  | 1 | 1        | 0.35     | 0.25     | NA | NA | NA | NA |
| 0.05  | 0.02  | -0.1  | -0.04 | 1 | 0.85     | 0.001    | 0.31     | NA | NA | NA | NA |
| -0.01 | 0.03  | -0.09 | 0.03  | 1 | 1        | 0.015    | 0.55     | NA | NA | NA | NA |
| 0     | 0.17  | -0.06 | -0.03 | 1 | 0.018    | 0.0034   | 0.13     | NA | NA | NA | NA |
| -0.01 | 0.07  | -0.02 | 0.05  | 1 | 0.11     | 0.33     | 0.014    | NA | NA | NA | NA |
| 0     | 0.05  | -0.03 | 0.05  | 1 | 0.1      | 0.12     | 0.0053   | NA | NA | NA | NA |
| 0.11  | 0.06  | -0.01 | 0     | 1 | 1        | 0.78     | 1        | NA | NA | NA | NA |
| 0     | 0.05  | -0.02 | -0.01 | 1 | 0.06     | 0.31     | 0.65     | NA | NA | NA | NA |
| -0.03 | -0.03 | -0.05 | 0     | 1 | 0.49     | 0.047    | 1        | NA | NA | NA | NA |
| 0     | 0     | 0.03  | 0.05  | 1 | 1        | 0.23     | 0.02     | NA | NA | NA | NA |
| 0.01  | 0.06  | -0.08 | 0.01  | 1 | 0.22     | 5.40E-07 | 0.62     | NA | NA | NA | NA |
| 0.02  | 0.03  | 0.01  | -0.03 | 1 | 0.63     | 1        | 0.64     | NA | NA | NA | NA |
| 0     | 0.14  | 0     | 0.03  | 1 | 6.50E-05 | 0.97     | 0.037    | NA | NA | NA | NA |
| 0.02  | 0.01  | -0.07 | -0.04 | 1 | 0.9      | 0.15     | 0.65     | NA | NA | NA | NA |
| -0.01 | NA    | -0.18 | 0.05  | 1 | NA       | 0.00078  | 0.6      | NA | NA | NA | NA |
| 0.01  | 0.16  | -0.01 | 0.01  | 1 | 0.0036   | 0.66     | 0.57     | NA | NA | NA | NA |
| 0     | 0.08  | -0.08 | -0.02 | 1 | 0.005    | 8.20E-07 | 0.26     | NA | NA | NA | NA |
| -0.01 | -0.01 | -0.2  | -0.09 | 1 | 0.98     | 1.90E-05 | 0.11     | NA | NA | NA | NA |
| 0.03  | 0.03  | -0.08 | -0.06 | 1 | 0.71     | 0.059    | 0.33     | NA | NA | NA | NA |
| 0.01  | 0.03  | 0     | 0.06  | 1 | 0.47     | 0.9      | 0.0023   | NA | NA | NA | NA |
| 0.01  | -0.04 | -0.08 | 0.1   | 1 | 1        | 0.15     | 0.11     | NA | NA | NA | NA |
| -0.03 | 0     | -0.04 | 0.01  | 1 | 1        | 0.23     | 0.93     | NA | NA | NA | NA |
| 0     | 0.14  | 0     | 0.08  | 1 | 0.013    | 0.8      | 2.10E-05 | NA | NA | NA | NA |
| 0.02  | 0.01  | -0.05 | 0.07  | 1 | 1        | 0.084    | 0.063    | NA | NA | NA | NA |
| 0     | 0.03  | -0.02 | 0.07  | 1 | 0.54     | 0.22     | 0.0018   | NA | NA | NA | NA |
| 0     | 0.08  | -0.06 | -0.02 | 1 | 0.3      | 0.0056   | 0.34     | NA | NA | NA | NA |
| 0     | 0.06  | 0.02  | 0.1   | 1 | 0.27     | 0.45     | 0.00035  | NA | NA | NA | NA |
| 0     | 0.1   | 0.01  | 0.09  | 1 | 0.0026   | 0.72     | 0.00014  | NA | NA | NA | NA |



|       |       |       |       |   |          |          |          |    |    |    |    |
|-------|-------|-------|-------|---|----------|----------|----------|----|----|----|----|
| 0     | -0.07 | -0.03 | 0.11  | 1 | 1        | 0.73     | 0.0074   | NA | NA | NA | NA |
| 0.03  | 0.06  | -0.03 | 0     | 1 | 1        | 0.44     | 1        | NA | NA | NA | NA |
| 0.01  | 0.05  | 0     | 0.02  | 1 | 0.13     | 0.98     | 0.29     | NA | NA | NA | NA |
| 0     | 0.02  | -0.08 | -0.02 | 1 | 0.44     | 3.30E-06 | 0.17     | NA | NA | NA | NA |
| 0     | 0     | 0.26  | 0.63  | 1 | 1        | 0.17     | 0.81     | NA | NA | NA | NA |
| -0.01 | 0.11  | -0.03 | 0     | 1 | 0.0026   | 0.057    | 1        | NA | NA | NA | NA |
| 0.01  | 0.04  | -0.05 | 0.02  | 1 | 0.91     | 0.13     | 0.52     | NA | NA | NA | NA |
| -0.01 | -0.02 | -0.08 | 0.06  | 1 | 0.89     | 0.0013   | 0.11     | NA | NA | NA | NA |
| 0     | -0.02 | -0.07 | -0.1  | 1 | 0.93     | 0.066    | 0.076    | NA | NA | NA | NA |
| 0     | -0.8  | -0.1  | -0.05 | 1 | 0.47     | 0.0015   | 0.34     | NA | NA | NA | NA |
| -0.01 | -0.02 | -0.04 | -0.02 | 1 | 0.9      | 0.098    | 0.51     | NA | NA | NA | NA |
| 0.16  | 0.33  | -0.03 | NA    | 1 | 0.066    | 0.71     | NA       | NA | NA | NA | NA |
| 0     | NA    | NA    | NA    | 1 | NA       | NA       | NA       | NA | NA | NA | NA |
| -0.01 | 0.19  | 0.08  | 0.07  | 1 | 0.092    | 0.0046   | 0.00099  | NA | NA | NA | NA |
| 0     | -0.02 | -0.03 | 0.01  | 1 | 0.58     | 0.22     | 0.81     | NA | NA | NA | NA |
| 0.03  | 0.05  | -0.03 | -0.01 | 1 | 0.85     | 0.51     | 0.92     | NA | NA | NA | NA |
| 0     | 0.12  | 0.01  | 0.08  | 1 | 0.00013  | 0.62     | 3.20E-05 | NA | NA | NA | NA |
| -0.01 | 0.09  | 0.01  | 0.04  | 1 | 0.87     | 0.92     | 0.37     | NA | NA | NA | NA |
| 0     | -0.02 | -0.03 | -0.02 | 1 | 0.52     | 0.05     | 0.16     | NA | NA | NA | NA |
| 0     | 0.11  | 0.11  | 0.12  | 1 | 0.031    | 0.00093  | 0.00016  | NA | NA | NA | NA |
| -0.06 | 0.02  | -0.04 | 0.07  | 1 | 1        | 0.24     | 0.13     | NA | NA | NA | NA |
| 0.12  | 0.04  | -0.06 | NA    | 1 | 1        | 0.15     | NA       | NA | NA | NA | NA |
| -0.02 | NA    | 0.04  | 0.06  | 1 | NA       | 0.18     | 0.074    | NA | NA | NA | NA |
| 0.03  | 0.2   | -0.05 | 0.04  | 1 | 0.11     | 0.13     | 0.41     | NA | NA | NA | NA |
| -0.02 | -0.04 | 0     | 0.05  | 1 | 0.74     | 1        | 0.32     | NA | NA | NA | NA |
| 0.01  | -0.07 | -0.09 | -0.05 | 1 | 0.46     | 0.028    | 0.24     | NA | NA | NA | NA |
| 0.15  | 0.72  | 0.02  | 0.07  | 1 | 9.50E-06 | 0.51     | 0.21     | NA | NA | NA | NA |
| -0.1  | -0.12 | 0.01  | -0.01 | 1 | 1        | 0.69     | 0.77     | NA | NA | NA | NA |
| 0.01  | NA    | -0.07 | -0.03 | 1 | NA       | 0.064    | 0.56     | NA | NA | NA | NA |
| -0.01 | -0.01 | -0.02 | 0.06  | 1 | 0.83     | 0.33     | 0.0041   | NA | NA | NA | NA |

|       |       |       |       |   |          |          |          |    |    |    |    |
|-------|-------|-------|-------|---|----------|----------|----------|----|----|----|----|
| -0.01 | NA    | NA    | NA    | 1 | NA       | NA       | NA       | NA | NA | NA | NA |
| 0     | 0.25  | -0.03 | -0.03 | 1 | 0.0017   | 0.31     | 0.15     | NA | NA | NA | NA |
| 0.07  | 0.03  | 0.02  | 0.09  | 1 | 0.65     | 0.58     | 0.0017   | NA | NA | NA | NA |
| -0.03 | -0.02 | -0.07 | 0.04  | 1 | 0.73     | 0.0014   | 0.19     | NA | NA | NA | NA |
| 0.03  | 0.02  | -0.01 | 0.03  | 1 | 1        | 0.95     | 0.37     | NA | NA | NA | NA |
| 0.01  | 0     | -0.02 | -0.04 | 1 | 1        | 0.41     | 0.078    | NA | NA | NA | NA |
| 0     | NA    | 0.02  | NA    | 1 | NA       | 1        | NA       | NA | NA | NA | NA |
| 0     | 0.02  | 0     | -0.01 | 1 | 1        | 1        | 0.98     | NA | NA | NA | NA |
| -0.01 | 0.15  | -0.1  | -0.06 | 1 | 0.00036  | 2.70E-07 | 0.015    | NA | NA | NA | NA |
| 0     | 0     | -0.05 | -0.04 | 1 | 1        | 0.0068   | 0.027    | NA | NA | NA | NA |
| 0     | 0.18  | -0.1  | -0.03 | 1 | 2.80E-05 | 1.30E-08 | 0.12     | NA | NA | NA | NA |
| 0.1   | -0.07 | -0.11 | -0.1  | 1 | 0.52     | 0.0053   | 0.098    | NA | NA | NA | NA |
| 0     | -0.01 | -0.05 | -0.02 | 1 | 0.93     | 0.026    | 0.29     | NA | NA | NA | NA |
| -0.01 | -0.02 | -0.03 | -0.05 | 1 | 0.8      | 0.24     | 0.0074   | NA | NA | NA | NA |
| -0.01 | 0.06  | -0.02 | 0.01  | 1 | 0.58     | 0.46     | 0.77     | NA | NA | NA | NA |
| 0     | 0.07  | -0.02 | 0.04  | 1 | 0.0075   | 0.28     | 0.02     | NA | NA | NA | NA |
| -0.01 | -0.02 | -0.03 | 0.06  | 1 | 0.73     | 0.1      | 0.00054  | NA | NA | NA | NA |
| 0     | 0.09  | -0.01 | 0.04  | 1 | 0.0025   | 0.54     | 0.019    | NA | NA | NA | NA |
| -0.01 | -0.04 | -0.07 | -0.05 | 1 | 0.77     | 0.00066  | 0.014    | NA | NA | NA | NA |
| 0     | NA    | 0.2   | NA    | 1 | NA       | 0.7      | NA       | NA | NA | NA | NA |
| 0.02  | -0.02 | -0.03 | 0.07  | 1 | 1        | 0.54     | 0.17     | NA | NA | NA | NA |
| -0.01 | 0.11  | 0     | 0.01  | 1 | 0.04     | 1        | 0.65     | NA | NA | NA | NA |
| -0.04 | 0.13  | 0     | -0.01 | 1 | 0.23     | 1        | 1        | NA | NA | NA | NA |
| 0.04  | -0.13 | -0.06 | 0     | 1 | 0.53     | 0.44     | 1        | NA | NA | NA | NA |
| 0     | 0.06  | -0.08 | -0.16 | 1 | 0.21     | 0.014    | 3.30E-05 | NA | NA | NA | NA |
| 0     | 0.33  | -0.07 | -0.04 | 1 | 0.057    | 0.18     | 0.55     | NA | NA | NA | NA |
| 0     | 0     | -0.03 | 0.12  | 1 | 1        | 0.29     | 5.00E-05 | NA | NA | NA | NA |
| 0     | -0.09 | -0.05 | -0.02 | 1 | 0.18     | 0.25     | 0.57     | NA | NA | NA | NA |
| 0     | 0.01  | -0.05 | -0.01 | 1 | 0.87     | 0.00033  | 0.56     | NA | NA | NA | NA |
| -0.04 | 0.06  | 0     | 0.03  | 1 | 0.76     | 1        | 0.11     | NA | NA | NA | NA |



|    |       |       |       |    |          |          |        |    |    |    |    |
|----|-------|-------|-------|----|----------|----------|--------|----|----|----|----|
| NA | NA    | 0.01  | 0.11  | NA | NA       | 1        | 0.079  | NA | NA | NA | NA |
| NA | NA    | -0.02 | -0.02 | NA | NA       | 0.7      | 0.89   | NA | NA | NA | NA |
| NA | NA    | -0.13 | -0.03 | NA | NA       | 0.044    | 0.82   | NA | NA | NA | NA |
| NA | NA    | NA    | NA    | NA | NA       | NA       | NA     | NA | NA | NA | NA |
| NA | NA    | 0     | 0.33  | NA | NA       | 1        | 0.02   | NA | NA | NA | NA |
| NA | -0.02 | -0.07 | 0.06  | NA | 0.93     | 2.50E-06 | 0.0021 | NA | NA | NA | NA |
| NA | NA    | 0.04  | 0.01  | NA | NA       | 0.46     | 1      | NA | NA | NA | NA |
| NA | -0.05 | -0.23 | -0.06 | NA | 1        | 0.0084   | 0.82   | NA | NA | NA | NA |
| NA | NA    | NA    | NA    | NA | NA       | NA       | NA     | NA | NA | NA | NA |
| NA | NA    | -0.07 | -0.03 | NA | NA       | 0.3      | 0.77   | NA | NA | NA | NA |
| NA | NA    | 0     | 0.05  | NA | NA       | 1        | 0.33   | NA | NA | NA | NA |
| NA | NA    | -0.8  | NA    | NA | NA       | 0.018    | NA     | NA | NA | NA | NA |
| NA | NA    | -0.1  | 0     | NA | NA       | 0.054    | 1      | NA | NA | NA | NA |
| NA | 0.29  | -0.06 | -0.03 | NA | 0.16     | 0.39     | 0.75   | NA | NA | NA | NA |
| NA | 0     | 0     | 0.07  | NA | 1        | 1        | 0.029  | NA | NA | NA | NA |
| NA | -0.03 | -0.01 | -0.04 | NA | 1        | 1        | 0.52   | NA | NA | NA | NA |
| NA | NA    | -0.04 | NA    | NA | NA       | 1        | NA     | NA | NA | NA | NA |
| NA | NA    | -0.03 | 0     | NA | NA       | 0.44     | 1      | NA | NA | NA | NA |
| NA | NA    | NA    | NA    | NA | NA       | NA       | NA     | NA | NA | NA | NA |
| NA | NA    | 0     | -0.02 | NA | NA       | 1        | 0.8    | NA | NA | NA | NA |
| NA | NA    | 0.29  | 0.29  | NA | NA       | 0.23     | 0.23   | NA | NA | NA | NA |
| NA | NA    | NA    | NA    | NA | NA       | NA       | NA     | NA | NA | NA | NA |
| NA | NA    | -0.14 | 0.7   | NA | NA       | 0.028    | 0.67   | NA | NA | NA | NA |
| NA | NA    | 0.04  | 0.07  | NA | NA       | 0.34     | 0.25   | NA | NA | NA | NA |
| NA | 0.34  | 0.04  | 0.18  | NA | 1.80E-06 | 0.44     | 0.0036 | NA | NA | NA | NA |
| NA | NA    | -0.1  | -0.11 | NA | NA       | 0.65     | 0.33   | NA | NA | NA | NA |
| NA | 0.17  | -0.01 | 0.04  | NA | 0.012    | 0.77     | 0.23   | NA | NA | NA | NA |
| NA | NA    | -0.02 | -0.05 | NA | NA       | 0.66     | 0.23   | NA | NA | NA | NA |
| NA | NA    | 0.03  | 0.03  | NA | NA       | 0.54     | 0.69   | NA | NA | NA | NA |
| NA | NA    | 0.6   | NA    | NA | NA       | 0.55     | NA     | NA | NA | NA | NA |

|    |       |       |       |    |          |        |          |    |    |    |    |
|----|-------|-------|-------|----|----------|--------|----------|----|----|----|----|
| NA | 0.09  | -0.07 | -0.02 | NA | 0.39     | 0.12   | 0.95     | NA | NA | NA | NA |
| NA | NA    | -0.01 | 0.09  | NA | NA       | 1      | 0.28     | NA | NA | NA | NA |
| NA | NA    | 0     | NA    | NA | NA       | 1      | NA       | NA | NA | NA | NA |
| NA | 0.77  | -0.02 | -0.03 | NA | 0.11     | 0.43   | 0.27     | NA | NA | NA | NA |
| NA | NA    | NA    | NA    | NA | NA       | NA     | NA       | NA | NA | NA | NA |
| NA | NA    | NA    | NA    | NA | NA       | NA     | NA       | NA | NA | NA | NA |
| NA | NA    | 0.03  | 0.08  | NA | NA       | 0.74   | 0.16     | NA | NA | NA | NA |
| NA | 0.2   | 0.02  | 0.04  | NA | 0.41     | 0.68   | 0.71     | NA | NA | NA | NA |
| NA | -0.67 | -0.13 | -0.01 | NA | 0.0016   | 0.014  | 1        | NA | NA | NA | NA |
| NA | NA    | NA    | NA    | NA | NA       | NA     | NA       | NA | NA | NA | NA |
| NA | -0.16 | -0.08 | 0.2   | NA | 0.55     | 0.041  | 0.00022  | NA | NA | NA | NA |
| NA | NA    | NA    | NA    | NA | NA       | NA     | NA       | NA | NA | NA | NA |
| NA | 0.33  | 0.06  | 0.54  | NA | 1        | 0.41   | 0.0056   | NA | NA | NA | NA |
| NA | 0.2   | 0.01  | 0.01  | NA | 0.12     | 0.94   | 0.94     | NA | NA | NA | NA |
| NA | 0.1   | -0.03 | 0.02  | NA | 0.13     | 0.4    | 0.85     | NA | NA | NA | NA |
| NA | NA    | 0.21  | 0.51  | NA | NA       | 0.18   | 0.00064  | NA | NA | NA | NA |
| NA | NA    | -0.1  | NA    | NA | NA       | 0.17   | NA       | NA | NA | NA | NA |
| NA | NA    | -0.12 | NA    | NA | NA       | 1      | NA       | NA | NA | NA | NA |
| NA | -0.36 | 0.08  | 0     | NA | 0.92     | 0.42   | 1        | NA | NA | NA | NA |
| NA | -0.32 | 0.01  | 0.19  | NA | 0.57     | 0.87   | 1.50E-07 | NA | NA | NA | NA |
| NA | 0.02  | -0.01 | 0.03  | NA | 1        | 0.85   | 0.15     | NA | NA | NA | NA |
| NA | 0.2   | 0     | 0     | NA | 0.15     | 1      | 1        | NA | NA | NA | NA |
| NA | 0.11  | -0.09 | -0.05 | NA | 1        | 0.006  | 0.3      | NA | NA | NA | NA |
| NA | 0.51  | -0.18 | -0.19 | NA | 1.30E-07 | 0.0022 | 0.00045  | NA | NA | NA | NA |
| NA | NA    | 0.01  | 0.12  | NA | NA       | 1      | 0.17     | NA | NA | NA | NA |
| NA | -0.06 | -0.13 | 0.79  | NA | 1        | 0.068  | 3.30E-05 | NA | NA | NA | NA |
| NA | 0.05  | -0.09 | -0.09 | NA | 0.89     | 0.074  | 0.043    | NA | NA | NA | NA |
| NA | 0.54  | 0.15  | 0.12  | NA | 0.0022   | 0.13   | 0.097    | NA | NA | NA | NA |
| NA | NA    | 0.22  | NA    | NA | NA       | 0.53   | NA       | NA | NA | NA | NA |
| NA | NA    | -0.22 | 0.18  | NA | NA       | 0.13   | 1        | NA | NA | NA | NA |

|    |       |       |       |    |       |          |          |    |    |    |    |
|----|-------|-------|-------|----|-------|----------|----------|----|----|----|----|
| NA | NA    | -0.06 | -0.01 | NA | NA    | 0.42     | 1        | NA | NA | NA | NA |
| NA | 0.17  | 0.06  | 0.03  | NA | 0.47  | 0.41     | 0.81     | NA | NA | NA | NA |
| NA | 0.02  | -0.02 | 0.1   | NA | 1     | 0.93     | 0.11     | NA | NA | NA | NA |
| NA | 0.08  | -0.09 | -0.1  | NA | 0.66  | 0.0049   | 0.018    | NA | NA | NA | NA |
| NA | NA    | -0.1  | -0.06 | NA | NA    | 0.0081   | 0.28     | NA | NA | NA | NA |
| NA | -0.41 | 0.48  | 0.08  | NA | 0.016 | 0.13     | 0.84     | NA | NA | NA | NA |
| NA | NA    | -0.28 | 0.1   | NA | NA    | 7.00E-05 | 0.95     | NA | NA | NA | NA |
| NA | NA    | -0.05 | 0.86  | NA | NA    | 0.7      | 6.10E-07 | NA | NA | NA | NA |
| NA | NA    | NA    | NA    | NA | NA    | NA       | NA       | NA | NA | NA | NA |
| NA | -0.02 | -0.15 | -0.14 | NA | 0.81  | 0.0057   | 0.0046   | NA | NA | NA | NA |
| NA | NA    | -0.14 | 0.23  | NA | NA    | 0.12     | 0.14     | NA | NA | NA | NA |
| NA | NA    | NA    | NA    | NA | NA    | NA       | NA       | NA | NA | NA | NA |
| NA | 0.03  | 0.02  | 0.11  | NA | 1     | 0.83     | 0.062    | NA | NA | NA | NA |
| NA | 0.01  | -0.06 | 0.06  | NA | 1     | 0.31     | 0.37     | NA | NA | NA | NA |
| NA | NA    | 0.09  | 0.84  | NA | NA    | 1        | 0.0075   | NA | NA | NA | NA |
| NA | NA    | NA    | NA    | NA | NA    | NA       | NA       | NA | NA | NA | NA |
| NA | NA    | 0.01  | 0.04  | NA | NA    | 0.8      | 1        | NA | NA | NA | NA |
| NA | NA    | 0.1   | 0.33  | NA | NA    | 1        | 0.49     | NA | NA | NA | NA |
| NA | 0     | 0     | 0.01  | NA | 1     | 1        | 1        | NA | NA | NA | NA |
| NA | NA    | NA    | NA    | NA | NA    | NA       | NA       | NA | NA | NA | NA |
| NA | NA    | 0.02  | 0.79  | NA | NA    | 1        | 0.15     | NA | NA | NA | NA |
| NA | 0.12  | 0.01  | 0.17  | NA | 1     | 0.84     | 0.00018  | NA | NA | NA | NA |
| NA | 0.1   | -0.09 | 0.36  | NA | 1     | 0.55     | 0.13     | NA | NA | NA | NA |
| NA | NA    | -0.12 | 0.16  | NA | NA    | 0.0061   | 0.3      | NA | NA | NA | NA |
| NA | NA    | -0.11 | 0.08  | NA | NA    | 0.68     | 0.63     | NA | NA | NA | NA |
| NA | NA    | 0     | 0.75  | NA | NA    | 1        | 0.01     | NA | NA | NA | NA |
| NA | NA    | 0.12  | -0.02 | NA | NA    | 0.00017  | 0.62     | NA | NA | NA | NA |
| NA | 0.25  | -0.13 | -0.06 | NA | 0.32  | 0.067    | 0.45     | NA | NA | NA | NA |
| NA | 0.64  | NA    | NA    | NA | 0.83  | NA       | NA       | NA | NA | NA | NA |
| NA | NA    | -0.19 | -0.07 | NA | NA    | 0.056    | 0.87     | NA | NA | NA | NA |

|       |       |       |       |          |          |          |          |    |    |    |    |
|-------|-------|-------|-------|----------|----------|----------|----------|----|----|----|----|
| NA    | -0.01 | 0.02  | -0.02 | NA       | 1        | 0.94     | 0.6      | NA | NA | NA | NA |
| NA    | NA    | NA    | NA    | NA       | NA       | NA       | NA       | NA | NA | NA | NA |
| NA    | NA    | NA    | NA    | NA       | NA       | NA       | NA       | NA | NA | NA | NA |
| NA    | NA    | NA    | NA    | NA       | NA       | NA       | NA       | NA | NA | NA | NA |
| NA    | 0.32  | 0.02  | 0.79  | NA       | 0.29     | 0.83     | 0.073    | NA | NA | NA | NA |
| NA    | 0.03  | -0.02 | 0     | NA       | 0.84     | 0.86     | 1        | NA | NA | NA | NA |
| NA    | -0.19 | -0.12 | 0.21  | NA       | 0.61     | 0.47     | 1        | NA | NA | NA | NA |
| NA    | NA    | NA    | NA    | NA       | NA       | NA       | NA       | NA | NA | NA | NA |
| NA    | 0.12  | -0.05 | 0     | NA       | 0.19     | 0.29     | 1        | NA | NA | NA | NA |
| NA    | NA    | -0.04 | -0.03 | NA       | NA       | 0.68     | 0.57     | NA | NA | NA | NA |
| NA    | NA    | NA    | NA    | NA       | NA       | NA       | NA       | NA | NA | NA | NA |
| NA    | NA    | NA    | NA    | NA       | NA       | NA       | NA       | NA | NA | NA | NA |
| 0.24  | 0.16  | -0.03 | -0.05 | 1.70E-09 | 1.40E-08 | 0.29     | 0.014    | NA | NA | NA | NA |
| 0.19  | 0.06  | -0.05 | 0.02  | 2.50E-08 | 0.023    | 0.012    | 0.36     | NA | NA | NA | NA |
| 0.22  | 0.02  | -0.04 | -0.01 | 3.10E-08 | 0.67     | 0.031    | 0.55     | NA | NA | NA | NA |
| 0.56  | -0.01 | -0.08 | 0.08  | 4.30E-08 | 0.91     | 0.029    | 0.14     | NA | NA | NA | NA |
| 0.18  | 0.08  | -0.06 | -0.01 | 9.10E-08 | 0.012    | 9.50E-06 | 0.39     | NA | NA | NA | NA |
| -0.37 | -0.14 | -0.11 | 0     | 1.80E-07 | 0.16     | 0.046    | 1        | NA | NA | NA | NA |
| -0.14 | 0.01  | 0     | 0.08  | 3.60E-07 | 0.9      | 0.85     | 0.00042  | NA | NA | NA | NA |
| -0.1  | 0.01  | -0.06 | -0.05 | 4.10E-07 | 0.73     | 0.00015  | 0.0012   | NA | NA | NA | NA |
| 0.18  | 0.12  | -0.01 | 0.04  | 7.30E-07 | 4.30E-06 | 0.38     | 0.02     | NA | NA | NA | NA |
| 0.23  | 0.1   | -0.21 | -0.21 | 1.10E-06 | 0.042    | 6.50E-08 | 3.20E-07 | NA | NA | NA | NA |
| 0.14  | 0.04  | -0.04 | 0.01  | 1.70E-06 | 0.16     | 0.018    | 0.81     | NA | NA | NA | NA |
| 0.16  | 0.05  | -0.04 | 0     | 2.00E-06 | 0.019    | 0.0048   | 0.79     | NA | NA | NA | NA |
| 0.17  | 0.08  | 0.01  | -0.02 | 2.50E-06 | 0.018    | 0.51     | 0.25     | NA | NA | NA | NA |
| 0.15  | 0.05  | -0.04 | 0.01  | 2.80E-06 | 0.037    | 0.17     | 0.64     | NA | NA | NA | NA |
| -0.19 | -0.15 | -0.01 | 0.03  | 3.60E-06 | 0.0014   | 0.55     | 0.096    | NA | NA | NA | NA |
| -0.11 | -0.02 | -0.03 | 0.04  | 5.10E-06 | 0.7      | 0.15     | 0.094    | NA | NA | NA | NA |
| 0.2   | 0.15  | -0.09 | -0.05 | 6.50E-06 | 0.00046  | 2.70E-07 | 0.0094   | NA | NA | NA | NA |
| 0.46  | 0.07  | -0.03 | 0.13  | 8.80E-06 | 0.53     | 0.37     | 0.00061  | NA | NA | NA | NA |

|       |       |       |       |          |          |          |          |    |    |    |    |
|-------|-------|-------|-------|----------|----------|----------|----------|----|----|----|----|
| 0.05  | 0.04  | -0.01 | 0.04  | 9.70E-06 | 0.00015  | 0.099    | 1.50E-06 | NA | NA | NA | NA |
| 0.23  | 0.19  | -0.01 | -0.03 | 1.10E-05 | 0.00038  | 0.77     | 0.42     | NA | NA | NA | NA |
| 0.19  | 0.06  | -0.03 | -0.01 | 1.70E-05 | 0.058    | 0.24     | 0.59     | NA | NA | NA | NA |
| 0.69  | 0.36  | 0.05  | 0.13  | 2.00E-05 | 0.00095  | 0.13     | 0.069    | NA | NA | NA | NA |
| 0.54  | 0.09  | -0.12 | -0.08 | 2.30E-05 | 1        | 0.00018  | 0.033    | NA | NA | NA | NA |
| 0.17  | 0.11  | -0.06 | 0.05  | 2.40E-05 | 0.0033   | 0.00065  | 0.0074   | NA | NA | NA | NA |
| 0.25  | 0.29  | -0.07 | 0.14  | 3.30E-05 | 7.10E-06 | 0.015    | 0.0036   | NA | NA | NA | NA |
| 0.19  | 0.05  | -0.08 | -0.02 | 4.30E-05 | 0.25     | 0.0021   | 0.69     | NA | NA | NA | NA |
| -0.09 | 0.11  | -0.05 | -0.01 | 5.20E-05 | 8.70E-05 | 0.00011  | 0.56     | NA | NA | NA | NA |
| -0.08 | 0.04  | -0.08 | -0.02 | 6.40E-05 | 0.33     | 6.10E-09 | 0.33     | NA | NA | NA | NA |
| -0.25 | -0.02 | 0.08  | 0.06  | 9.60E-05 | 0.98     | 0.086    | 0.48     | NA | NA | NA | NA |
| 0.15  | 0.03  | -0.01 | 0.03  | 0.00018  | 0.31     | 0.88     | 0.14     | NA | NA | NA | NA |
| 0.31  | 0.23  | 0.19  | 0.09  | 0.00019  | 0.0097   | 0.0022   | 0.12     | NA | NA | NA | NA |
| 0.12  | 0.06  | 0.02  | 0.04  | 0.00031  | 0.045    | 0.21     | 0.013    | NA | NA | NA | NA |
| -0.12 | -0.05 | -0.01 | 0.1   | 0.00033  | 0.2      | 0.46     | 2.50E-06 | NA | NA | NA | NA |
| 0.08  | 0.03  | -0.04 | -0.02 | 0.00034  | 0.073    | 0.034    | 0.47     | NA | NA | NA | NA |
| -0.05 | 0.09  | -0.01 | 0.02  | 0.00034  | 0.00019  | 0.54     | 0.15     | NA | NA | NA | NA |
| 0.08  | 0.07  | -0.03 | -0.01 | 0.00036  | 0.00078  | 0.016    | 0.46     | NA | NA | NA | NA |
| 0.16  | 0.05  | -0.04 | -0.01 | 0.00037  | 0.08     | 0.014    | 0.69     | NA | NA | NA | NA |
| 0.36  | 0     | -0.09 | -0.02 | 0.00041  | 1        | 0.057    | 0.53     | NA | NA | NA | NA |
| 0.09  | 0.01  | -0.01 | 0.03  | 0.00044  | 0.57     | 0.47     | 0.093    | NA | NA | NA | NA |
| 0.08  | 0.04  | 0.02  | -0.01 | 0.00048  | 0.084    | 0.46     | 0.58     | NA | NA | NA | NA |
| 0.26  | 0.01  | -0.07 | 0.05  | 0.00062  | 1        | 0.0058   | 0.39     | NA | NA | NA | NA |
| 0.28  | -0.02 | -0.06 | -0.03 | 0.00067  | 0.7      | 0.0085   | 0.29     | NA | NA | NA | NA |
| 0.16  | 0.05  | 0.04  | 0.13  | 0.00081  | 0.2      | 0.11     | 6.30E-07 | NA | NA | NA | NA |
| 0.09  | -0.01 | -0.02 | 0.05  | 0.00086  | 0.71     | 0.13     | 0.0078   | NA | NA | NA | NA |
| 0.2   | 0.25  | -0.03 | -0.04 | 0.00087  | 4.50E-07 | 0.42     | 0.25     | NA | NA | NA | NA |
| 0.13  | 0.2   | -0.07 | -0.04 | 0.00088  | 4.50E-09 | 4.30E-06 | 0.045    | NA | NA | NA | NA |
| 0.11  | 0.1   | -0.03 | 0.04  | 0.0011   | 0.00068  | 0.03     | 0.004    | NA | NA | NA | NA |
| 0.16  | 0.17  | -0.01 | 0.01  | 0.0013   | 0.0014   | 0.92     | 0.99     | NA | NA | NA | NA |



|       |       |       |       |        |          |          |        |    |    |    |    |
|-------|-------|-------|-------|--------|----------|----------|--------|----|----|----|----|
| -0.15 | -0.15 | -0.02 | 0.09  | 0.0014 | 0.00075  | 0.5      | 0.028  | NA | NA | NA | NA |
| -0.06 | -0.03 | -0.05 | -0.01 | 0.0014 | 0.16     | 1.90E-05 | 0.26   | NA | NA | NA | NA |
| -0.15 | -0.15 | -0.13 | -0.05 | 0.0015 | 0.00045  | 0.0073   | 0.22   | NA | NA | NA | NA |
| 0.11  | 0.08  | -0.04 | 0.07  | 0.0015 | 0.088    | 0.044    | 0.0046 | NA | NA | NA | NA |
| 0.09  | 0.07  | -0.04 | 0.02  | 0.0016 | 0.003    | 2.20E-06 | 0.047  | NA | NA | NA | NA |
| 0.33  | -0.02 | -0.02 | -0.05 | 0.0016 | 0.71     | 0.82     | 0.29   | NA | NA | NA | NA |
| 0.22  | 0.09  | -0.06 | 0.06  | 0.0017 | 0.17     | 0.0017   | 0.0058 | NA | NA | NA | NA |
| -0.18 | -0.04 | 0.03  | 0.07  | 0.0017 | 0.68     | 0.35     | 0.043  | NA | NA | NA | NA |
| 0.06  | 0.04  | -0.05 | 0.02  | 0.0021 | 0.017    | 0.00087  | 0.13   | NA | NA | NA | NA |
| -0.08 | -0.06 | -0.03 | 0.02  | 0.0025 | 0.091    | 0.0053   | 0.081  | NA | NA | NA | NA |
| 0.1   | 0.14  | -0.01 | 0.05  | 0.0028 | 1.90E-06 | 0.56     | 0.002  | NA | NA | NA | NA |
| 0.05  | 0.06  | -0.04 | -0.03 | 0.0031 | 0.00031  | 0.0011   | 0.025  | NA | NA | NA | NA |
| 0.26  | 0.07  | 0.02  | 0.08  | 0.0033 | 0.46     | 0.65     | 0.0097 | NA | NA | NA | NA |
| -0.09 | -0.08 | 0     | 0.05  | 0.0037 | 0.0055   | 0.85     | 0.0059 | NA | NA | NA | NA |
| 0.1   | -0.02 | -0.02 | 0.03  | 0.0039 | 0.39     | 0.15     | 0.021  | NA | NA | NA | NA |
| 0.05  | 0.01  | -0.04 | -0.01 | 0.004  | 0.53     | 0.00022  | 0.57   | NA | NA | NA | NA |
| 0.08  | 0.12  | -0.03 | -0.01 | 0.004  | 2.00E-04 | 0.09     | 0.78   | NA | NA | NA | NA |
| 0.06  | 0.03  | -0.04 | -0.03 | 0.0042 | 0.057    | 0.16     | 0.36   | NA | NA | NA | NA |
| -0.43 | -0.17 | -0.22 | -0.29 | 0.0047 | 0.36     | 0.035    | 0.015  | NA | NA | NA | NA |
| 0.08  | 0.05  | -0.08 | -0.02 | 0.0049 | 0.086    | 1.80E-07 | 0.3    | NA | NA | NA | NA |
| 0.06  | 0.05  | -0.04 | -0.01 | 0.0052 | 0.004    | 0.00071  | 0.57   | NA | NA | NA | NA |
| 0.11  | 0.08  | -0.05 | 0.02  | 0.0061 | 0.017    | 0.0073   | 0.47   | NA | NA | NA | NA |
| 0.11  | 0.1   | -0.03 | 0.04  | 0.0063 | 0.013    | 0.068    | 0.014  | NA | NA | NA | NA |
| 0.36  | 0.48  | 0.04  | NA    | 0.0067 | 0.00031  | 0.8      | NA     | NA | NA | NA | NA |
| -0.06 | 0.1   | -0.02 | 0.02  | 0.0068 | 0.0021   | 0.073    | 0.13   | NA | NA | NA | NA |
| -0.36 | -0.41 | -0.09 | 0.01  | 0.0068 | 0.00037  | 0.073    | 1      | NA | NA | NA | NA |
| 0.05  | 0.04  | -0.01 | 0.01  | 0.0075 | 0.0088   | 0.64     | 0.33   | NA | NA | NA | NA |
| -0.06 | -0.05 | -0.01 | 0.02  | 0.0076 | 0.044    | 0.43     | 0.072  | NA | NA | NA | NA |
| -0.1  | 0.05  | -0.04 | 0.05  | 0.0082 | 0.2      | 0.02     | 0.022  | NA | NA | NA | NA |
| 0.06  | 0.08  | 0     | 0.03  | 0.0088 | 0.00016  | 0.84     | 0.092  | NA | NA | NA | NA |

|       |       |       |       |        |          |          |          |    |    |    |    |
|-------|-------|-------|-------|--------|----------|----------|----------|----|----|----|----|
| 0.06  | 0.1   | -0.05 | 0.01  | 0.0096 | 6.20E-06 | 0.0023   | 0.63     | NA | NA | NA | NA |
| 0.81  | -0.02 | -0.01 | 0.07  | 0.0099 | 1        | 0.98     | 0.091    | NA | NA | NA | NA |
| 0.18  | 0.03  | -0.05 | -0.01 | 0.01   | 0.71     | 0.11     | 0.81     | NA | NA | NA | NA |
| -0.21 | 0.22  | 0.01  | 0.04  | 0.011  | 0.04     | 0.75     | 0.34     | NA | NA | NA | NA |
| 0.48  | 0.62  | -0.1  | 0.17  | 0.011  | 0.00017  | 0.51     | 0.53     | NA | NA | NA | NA |
| 0.08  | 0.05  | -0.04 | 0.03  | 0.011  | 0.046    | 0.011    | 0.091    | NA | NA | NA | NA |
| 0.05  | 0.05  | -0.01 | -0.05 | 0.011  | 0.0039   | 0.78     | 0.0075   | NA | NA | NA | NA |
| 0.17  | 0.08  | -0.05 | -0.02 | 0.012  | 0.47     | 0.17     | 0.78     | NA | NA | NA | NA |
| 0.12  | 0.1   | 0     | 0.1   | 0.012  | 0.031    | 1        | 6.50E-06 | NA | NA | NA | NA |
| -0.08 | -0.03 | -0.05 | 0     | 0.012  | 0.16     | 0.0015   | 0.94     | NA | NA | NA | NA |
| 0.12  | 0.08  | -0.08 | 0.01  | 0.013  | 0.025    | 5.00E-09 | 0.58     | NA | NA | NA | NA |
| -0.04 | 0.02  | -0.01 | 0.01  | 0.014  | 0.59     | 0.77     | 0.7      | NA | NA | NA | NA |
| -0.09 | 0.1   | -0.03 | 0.12  | 0.015  | 0.1      | 0.22     | 4.10E-06 | NA | NA | NA | NA |
| -0.04 | -0.01 | 0.01  | 0.09  | 0.015  | 0.56     | 0.72     | 8.00E-07 | NA | NA | NA | NA |
| 0.89  | 0.05  | 0.02  | 0.04  | 0.015  | 0.64     | 0.83     | 0.56     | NA | NA | NA | NA |
| 0.12  | 0.03  | -0.02 | 0.05  | 0.017  | 0.5      | 0.3      | 0.03     | NA | NA | NA | NA |
| 0.07  | 0.11  | -0.04 | 0.02  | 0.018  | 0.00026  | 0.053    | 0.42     | NA | NA | NA | NA |
| 0.08  | 0.13  | -0.05 | -0.01 | 0.021  | 7.00E-04 | 6.70E-05 | 0.75     | NA | NA | NA | NA |
| 0.13  | 0.11  | -0.02 | 0.07  | 0.021  | 0.028    | 0.49     | 0.015    | NA | NA | NA | NA |
| 0.19  | 0.15  | -0.05 | 0.01  | 0.021  | 0.09     | 0.026    | 0.74     | NA | NA | NA | NA |
| 0.3   | 0.18  | -0.01 | -0.06 | 0.022  | 0.44     | 1        | 0.61     | NA | NA | NA | NA |
| -0.54 | -0.38 | -0.06 | 0.16  | 0.022  | 0.0049   | 0.35     | 0.0095   | NA | NA | NA | NA |
| 0.17  | 0.16  | -0.07 | -0.02 | 0.024  | 0.044    | 0.3      | 0.86     | NA | NA | NA | NA |
| 0.07  | 0.08  | -0.05 | 0.12  | 0.024  | 0.0096   | 0.012    | 6.90E-08 | NA | NA | NA | NA |
| 0.07  | 0     | -0.01 | 0.01  | 0.024  | 1        | 0.84     | 0.86     | NA | NA | NA | NA |
| 0.08  | 0.05  | -0.04 | -0.01 | 0.026  | 0.049    | 0.028    | 0.74     | NA | NA | NA | NA |
| 0.07  | 0.07  | -0.04 | 0.05  | 0.027  | 0.035    | 0.0062   | 0.0053   | NA | NA | NA | NA |
| 0.05  | 0.09  | -0.06 | -0.03 | 0.028  | 0.00016  | 1.00E-04 | 0.011    | NA | NA | NA | NA |
| 0.64  | 0.46  | 0.05  | 0.07  | 0.029  | 0.032    | 0.39     | 0.087    | NA | NA | NA | NA |
| 0.07  | 0.04  | 0.04  | 0.02  | 0.03   | 0.28     | 0.045    | 0.12     | NA | NA | NA | NA |

|       |       |       |       |       |          |          |          |    |    |    |    |
|-------|-------|-------|-------|-------|----------|----------|----------|----|----|----|----|
| -0.09 | -0.03 | -0.02 | 0.07  | 0.031 | 0.76     | 0.38     | 0.0031   | NA | NA | NA | NA |
| 0.14  | -0.04 | -0.05 | -0.03 | 0.033 | 0.56     | 0.0098   | 0.12     | NA | NA | NA | NA |
| 0.07  | 0.12  | -0.01 | 0.03  | 0.034 | 0.00012  | 0.62     | 0.13     | NA | NA | NA | NA |
| 0.06  | -0.01 | 0.01  | -0.01 | 0.035 | 0.88     | 0.9      | 0.58     | NA | NA | NA | NA |
| -0.08 | -0.02 | -0.01 | 0.1   | 0.035 | 0.68     | 0.67     | 1.60E-08 | NA | NA | NA | NA |
| -0.12 | 0.23  | 0.01  | 0.09  | 0.036 | 0.11     | 0.96     | 0.023    | NA | NA | NA | NA |
| -0.08 | -0.05 | -0.02 | -0.01 | 0.036 | 0.2      | 0.17     | 0.65     | NA | NA | NA | NA |
| -0.06 | -0.03 | -0.04 | 0     | 0.038 | 0.49     | 0.11     | 0.98     | NA | NA | NA | NA |
| -0.08 | 0     | -0.06 | 0.04  | 0.038 | 0.97     | 2.90E-07 | 0.004    | NA | NA | NA | NA |
| 0.22  | 0.23  | -0.22 | -0.07 | 0.039 | 0.063    | 0.002    | 0.44     | NA | NA | NA | NA |
| 0.05  | 0.01  | -0.02 | 0.07  | 0.041 | 0.64     | 0.31     | 0.00048  | NA | NA | NA | NA |
| -0.07 | -0.08 | -0.07 | -0.02 | 0.042 | 0.0015   | 0.00037  | 0.22     | NA | NA | NA | NA |
| 0.05  | 0.07  | -0.05 | 0     | 0.042 | 0.0027   | 0.0012   | 1        | NA | NA | NA | NA |
| -0.21 | 0.27  | -0.02 | 0.07  | 0.044 | 0.75     | 0.47     | 0.14     | NA | NA | NA | NA |
| -0.05 | -0.01 | 0.03  | 0.14  | 0.046 | 0.79     | 0.24     | 5.60E-08 | NA | NA | NA | NA |
| 0.06  | 0.08  | -0.04 | -0.02 | 0.048 | 0.014    | 0.057    | 0.29     | NA | NA | NA | NA |
| 0.05  | 0.08  | 0.02  | 0.05  | 0.049 | 0.095    | 0.55     | 0.075    | NA | NA | NA | NA |
| -0.06 | -0.03 | -0.02 | -0.03 | 0.049 | 0.54     | 0.28     | 0.028    | NA | NA | NA | NA |
| -0.06 | -0.06 | -0.06 | -0.03 | 0.05  | 0.1      | 0.014    | 0.25     | NA | NA | NA | NA |
| 0.09  | 0     | -0.02 | 0.02  | 0.052 | 1        | 0.25     | 0.31     | NA | NA | NA | NA |
| 0.1   | 0.1   | -0.04 | 0     | 0.052 | 0.019    | 0.12     | 1        | NA | NA | NA | NA |
| 0.08  | 0.2   | -0.03 | -0.09 | 0.052 | 7.00E-07 | 0.44     | 0.0082   | NA | NA | NA | NA |
| 0.08  | 0     | -0.02 | 0.1   | 0.054 | 1        | 0.5      | 0.00018  | NA | NA | NA | NA |
| 0.31  | 0.12  | -0.03 | 0.59  | 0.055 | 0.46     | 1        | 0.0026   | NA | NA | NA | NA |
| -0.04 | 0     | -0.05 | -0.03 | 0.057 | 0.95     | 3.80E-05 | 0.043    | NA | NA | NA | NA |
| 0.11  | 0.04  | -0.09 | 0.02  | 0.057 | 0.48     | 0.00077  | 0.68     | NA | NA | NA | NA |
| 0.06  | 0.04  | 0     | 0.03  | 0.058 | 0.22     | 1        | 0.13     | NA | NA | NA | NA |
| 0.81  | 0.81  | 0.16  | 0.77  | 0.058 | 0.058    | 0.012    | 3.40E-08 | NA | NA | NA | NA |
| -0.07 | 0.02  | 0     | 0.12  | 0.062 | 0.89     | 0.89     | 1.50E-08 | NA | NA | NA | NA |
| 0.05  | 0.11  | -0.04 | -0.03 | 0.063 | 1.20E-05 | 0.011    | 0.047    | NA | NA | NA | NA |

|       |       |       |       |       |          |          |         |    |    |    |    |
|-------|-------|-------|-------|-------|----------|----------|---------|----|----|----|----|
| -0.17 | -0.18 | -0.11 | -0.09 | 0.064 | 0.028    | 0.059    | 0.1     | NA | NA | NA | NA |
| 0.06  | 0.12  | -0.06 | 0     | 0.067 | 8.20E-08 | 0.0056   | 0.97    | NA | NA | NA | NA |
| 0.08  | 0.11  | -0.02 | 0.02  | 0.067 | 4.40E-05 | 0.2      | 0.36    | NA | NA | NA | NA |
| -0.05 | 0     | -0.03 | -0.03 | 0.068 | 0.95     | 0.11     | 0.13    | NA | NA | NA | NA |
| 0.04  | 0.04  | -0.01 | 0.02  | 0.068 | 0.18     | 0.73     | 0.23    | NA | NA | NA | NA |
| 0.08  | 0     | 0.08  | 0     | 0.069 | 1        | 0.024    | 0.99    | NA | NA | NA | NA |
| -0.05 | -0.03 | -0.04 | 0.05  | 0.071 | 0.27     | 0.036    | 0.021   | NA | NA | NA | NA |
| 0.04  | 0.11  | -0.07 | 0.02  | 0.072 | 4.80E-05 | 1.70E-08 | 0.24    | NA | NA | NA | NA |
| -0.05 | -0.05 | -0.1  | -0.08 | 0.073 | 0.11     | 0.00017  | 0.0056  | NA | NA | NA | NA |
| -0.15 | 0     | 0.03  | 0     | 0.073 | 1        | 0.44     | 1       | NA | NA | NA | NA |
| -0.02 | -0.01 | -0.02 | 0     | 0.074 | 0.41     | 0.18     | 0.94    | NA | NA | NA | NA |
| 0.09  | 0     | -0.02 | -0.02 | 0.076 | 1        | 0.37     | 0.58    | NA | NA | NA | NA |
| 0.05  | 0.02  | -0.06 | 0     | 0.081 | 0.32     | 3.90E-05 | 0.89    | NA | NA | NA | NA |
| -0.18 | -0.07 | -0.05 | 0.05  | 0.085 | 0.74     | 0.089    | 0.18    | NA | NA | NA | NA |
| -0.04 | 0.02  | -0.04 | 0.02  | 0.086 | 0.56     | 0.0014   | 0.08    | NA | NA | NA | NA |
| 0.03  | 0.02  | -0.03 | -0.02 | 0.086 | 0.27     | 0.056    | 0.079   | NA | NA | NA | NA |
| 0.09  | 0.08  | -0.07 | -0.03 | 0.088 | 0.027    | 9.10E-05 | 0.15    | NA | NA | NA | NA |
| 0.15  | 0.45  | -0.01 | 0.04  | 0.089 | 3.90E-05 | 0.86     | 0.27    | NA | NA | NA | NA |
| -0.51 | 0.2   | -0.06 | 0.05  | 0.09  | 1        | 0.12     | 0.37    | NA | NA | NA | NA |
| 0.07  | 0.07  | -0.05 | 0.02  | 0.095 | 0.13     | 0.0083   | 0.37    | NA | NA | NA | NA |
| -0.04 | -0.01 | 0.01  | 0.03  | 0.097 | 0.77     | 0.44     | 0.12    | NA | NA | NA | NA |
| 0.95  | 0.95  | -0.18 | -0.16 | 0.097 | 0.097    | 0.0064   | 0.022   | NA | NA | NA | NA |
| 0.06  | 0.03  | -0.02 | 0.03  | 0.1   | 0.64     | 0.37     | 0.3     | NA | NA | NA | NA |
| -0.03 | 0.02  | -0.02 | 0.03  | 0.11  | 0.17     | 0.13     | 0.062   | NA | NA | NA | NA |
| 0.05  | 0.02  | -0.05 | -0.07 | 0.11  | 0.44     | 0.0028   | 0.00017 | NA | NA | NA | NA |
| -0.08 | 0.03  | -0.02 | 0.04  | 0.11  | 0.44     | 0.19     | 0.037   | NA | NA | NA | NA |
| 0.05  | -0.02 | -0.07 | -0.03 | 0.11  | 0.49     | 0.0016   | 0.19    | NA | NA | NA | NA |
| 0.06  | 0.01  | -0.04 | 0     | 0.11  | 0.91     | 0.19     | 0.95    | NA | NA | NA | NA |
| -0.04 | 0.09  | 0.03  | 0.01  | 0.11  | 0.04     | 0.13     | 0.84    | NA | NA | NA | NA |
| -0.04 | -0.01 | -0.05 | -0.06 | 0.11  | 0.79     | 0.053    | 0.043   | NA | NA | NA | NA |

|       |       |       |       |      |          |          |          |    |    |    |    |
|-------|-------|-------|-------|------|----------|----------|----------|----|----|----|----|
| 0.06  | 0.03  | -0.01 | 0     | 0.11 | 0.95     | 0.74     | 0.98     | NA | NA | NA | NA |
| 0.07  | 0.08  | 0.02  | 0.08  | 0.12 | 0.065    | 0.38     | 0.00052  | NA | NA | NA | NA |
| -0.05 | 0.13  | -0.02 | 0.01  | 0.12 | 9.80E-05 | 0.048    | 0.43     | NA | NA | NA | NA |
| 0.05  | 0.06  | -0.07 | -0.03 | 0.12 | 0.04     | 0.00035  | 0.15     | NA | NA | NA | NA |
| 0.38  | -0.01 | -0.08 | -0.02 | 0.12 | 0.81     | 0.0017   | 0.67     | NA | NA | NA | NA |
| 0.13  | 0.28  | 0.02  | 0.1   | 0.12 | 0.0037   | 0.25     | 1.50E-05 | NA | NA | NA | NA |
| -0.1  | 0     | -0.16 | 0.67  | 0.13 | 1        | 0.094    | 0.23     | NA | NA | NA | NA |
| 0.09  | 0     | 0     | -0.03 | 0.13 | 1        | 0.97     | 0.23     | NA | NA | NA | NA |
| -0.05 | 0     | -0.06 | -0.02 | 0.13 | 1        | 0.0019   | 0.27     | NA | NA | NA | NA |
| 0.06  | 0.04  | -0.06 | 0.04  | 0.13 | 0.19     | 6.10E-07 | 0.023    | NA | NA | NA | NA |
| -0.02 | 0     | 0     | 0.02  | 0.13 | 0.93     | 0.96     | 0.08     | NA | NA | NA | NA |
| 0.37  | NA    | -0.07 | 0.08  | 0.14 | NA       | 0.35     | 0.33     | NA | NA | NA | NA |
| 0.12  | 0.04  | -0.1  | -0.02 | 0.14 | 0.79     | 0.021    | 0.81     | NA | NA | NA | NA |
| 0.1   | 0.06  | -0.16 | -0.14 | 0.14 | 0.62     | 9.80E-06 | 0.00025  | NA | NA | NA | NA |
| -0.1  | 0.36  | -0.04 | 0.06  | 0.14 | 0.03     | 0.33     | 0.16     | NA | NA | NA | NA |
| -0.17 | -0.02 | -0.05 | -0.02 | 0.15 | 0.94     | 0.24     | 0.76     | NA | NA | NA | NA |
| 0.06  | 0.09  | 0.03  | 0.01  | 0.15 | 0.058    | 0.22     | 0.61     | NA | NA | NA | NA |
| 0.08  | 0.12  | -0.04 | -0.06 | 0.15 | 0.00074  | 0.16     | 0.033    | NA | NA | NA | NA |
| -0.11 | -0.01 | -0.05 | 0.09  | 0.16 | 1        | 0.22     | 0.0074   | NA | NA | NA | NA |
| 0.03  | 0.05  | -0.05 | 0     | 0.16 | 0.044    | 9.00E-05 | 0.85     | NA | NA | NA | NA |
| 0.5   | NA    | 0.09  | NA    | 0.16 | NA       | 0.7      | NA       | NA | NA | NA | NA |
| -0.23 | -0.11 | -0.06 | -0.12 | 0.16 | 0.45     | 0.71     | 0.46     | NA | NA | NA | NA |
| 0.02  | 0     | -0.03 | 0.02  | 0.17 | 1        | 0.0011   | 0.024    | NA | NA | NA | NA |
| -0.07 | 0.16  | 0.02  | 0.04  | 0.17 | 0.059    | 0.89     | 0.48     | NA | NA | NA | NA |
| 0.08  | -0.05 | -0.05 | 0.01  | 0.17 | 0.23     | 0.0039   | 0.54     | NA | NA | NA | NA |
| -0.02 | 0.04  | -0.04 | 0.04  | 0.18 | 0.053    | 0.0061   | 0.0045   | NA | NA | NA | NA |
| 0.02  | 0.05  | 0.01  | -0.04 | 0.18 | 0.024    | 0.68     | 0.04     | NA | NA | NA | NA |
| 0.12  | 0.13  | -0.14 | -0.13 | 0.18 | 0.054    | 0.0046   | 0.014    | NA | NA | NA | NA |
| -0.03 | 0.02  | 0.01  | 0.05  | 0.19 | 0.65     | 0.75     | 0.0083   | NA | NA | NA | NA |
| -0.06 | -0.06 | -0.04 | 0.03  | 0.19 | 0.57     | 0.15     | 0.45     | NA | NA | NA | NA |

|       |       |       |       |      |         |          |          |    |    |    |    |
|-------|-------|-------|-------|------|---------|----------|----------|----|----|----|----|
| -0.15 | -0.11 | -0.06 | -0.01 | 0.19 | 0.49    | 0.15     | 0.91     | NA | NA | NA | NA |
| 0.04  | 0.03  | -0.06 | 0     | 0.19 | 0.19    | 0.017    | 0.94     | NA | NA | NA | NA |
| 0.1   | 0.07  | 0.01  | 0.11  | 0.2  | 0.14    | 0.95     | 0.018    | NA | NA | NA | NA |
| -0.03 | 0.07  | -0.04 | 0.01  | 0.2  | 0.0079  | 0.0015   | 0.57     | NA | NA | NA | NA |
| -0.07 | -0.07 | -0.02 | 0.11  | 0.2  | 0.31    | 0.78     | 0.024    | NA | NA | NA | NA |
| -0.21 | -0.07 | -0.05 | -0.02 | 0.2  | 0.67    | 0.21     | 0.64     | NA | NA | NA | NA |
| 0.02  | 0.04  | -0.03 | -0.04 | 0.2  | 0.0068  | 0.065    | 0.00034  | NA | NA | NA | NA |
| -0.02 | 0.1   | -0.05 | 0.01  | 0.21 | 0.00011 | 0.00053  | 0.74     | NA | NA | NA | NA |
| -0.22 | 0.25  | -0.02 | -0.01 | 0.21 | 0.25    | 0.73     | 0.9      | NA | NA | NA | NA |
| 0.15  | 0.12  | -0.13 | -0.11 | 0.21 | 0.13    | 2.00E-05 | 2.00E-05 | NA | NA | NA | NA |
| 0.1   | 0.13  | -0.06 | -0.02 | 0.21 | 0.11    | 0.0019   | 0.39     | NA | NA | NA | NA |
| -0.05 | 0.04  | -0.06 | 0.01  | 0.21 | 0.45    | 0.00011  | 0.73     | NA | NA | NA | NA |
| 0.04  | 0.02  | -0.02 | 0.02  | 0.22 | 0.52    | 0.2      | 0.18     | NA | NA | NA | NA |
| -0.16 | -0.13 | -0.06 | 0     | 0.22 | 0.32    | 0.15     | 1        | NA | NA | NA | NA |
| 0.06  | 0     | -0.01 | 0     | 0.23 | 1       | 0.74     | 1        | NA | NA | NA | NA |
| 0.05  | 0.05  | 0     | 0.03  | 0.23 | 0.22    | 0.93     | 0.09     | NA | NA | NA | NA |
| -0.06 | 0.02  | 0     | 0.07  | 0.23 | 0.68    | 0.95     | 0.0016   | NA | NA | NA | NA |
| -0.08 | NA    | 0     | 0.03  | 0.23 | NA      | 1        | 0.4      | NA | NA | NA | NA |
| 0.05  | -0.05 | -0.03 | -0.05 | 0.24 | 0.21    | 0.29     | 0.038    | NA | NA | NA | NA |
| 0.05  | 0.05  | -0.03 | 0.05  | 0.24 | 0.18    | 0.28     | 0.32     | NA | NA | NA | NA |
| 0.02  | 0.04  | -0.05 | -0.01 | 0.24 | 0.019   | 0.035    | 0.65     | NA | NA | NA | NA |
| 0.02  | -0.01 | -0.02 | 0.03  | 0.25 | 0.51    | 0.092    | 0.002    | NA | NA | NA | NA |
| 0.03  | 0.08  | -0.06 | -0.05 | 0.25 | 0.00081 | 0.017    | 0.048    | NA | NA | NA | NA |
| 0.07  | -0.03 | -0.02 | 0.04  | 0.25 | 0.46    | 0.24     | 0.011    | NA | NA | NA | NA |
| -0.08 | -0.03 | -0.01 | 0.11  | 0.25 | 0.55    | 0.62     | 1.50E-07 | NA | NA | NA | NA |
| 0.17  | 0.06  | -0.07 | -0.06 | 0.26 | 0.92    | 0.028    | 0.078    | NA | NA | NA | NA |
| -0.03 | 0.01  | -0.01 | 0.02  | 0.26 | 0.9     | 0.68     | 0.32     | NA | NA | NA | NA |
| -0.07 | -0.01 | -0.05 | -0.02 | 0.26 | 1       | 0.059    | 0.53     | NA | NA | NA | NA |
| 0.04  | 0     | -0.06 | -0.02 | 0.26 | 1       | 0.0024   | 0.38     | NA | NA | NA | NA |
| 0.06  | 0.01  | -0.01 | -0.01 | 0.27 | 1       | 0.93     | 0.92     | NA | NA | NA | NA |

|       |       |       |       |      |          |         |          |    |    |    |    |
|-------|-------|-------|-------|------|----------|---------|----------|----|----|----|----|
| 0.16  | -0.1  | 0.06  | 0.18  | 0.27 | 0.36     | 0.12    | 9.40E-08 | NA | NA | NA | NA |
| -0.21 | -0.21 | -0.09 | -0.05 | 0.27 | 0.15     | 0.023   | 0.4      | NA | NA | NA | NA |
| -0.04 | 0.11  | -0.04 | 0.01  | 0.28 | 0.0041   | 0.12    | 0.7      | NA | NA | NA | NA |
| -0.03 | 0.21  | -0.01 | 0.05  | 0.28 | 4.20E-05 | 0.67    | 0.0063   | NA | NA | NA | NA |
| -0.07 | -0.1  | -0.05 | 0.19  | 0.29 | 0.11     | 0.27    | 0.94     | NA | NA | NA | NA |
| 0.03  | 0.05  | -0.06 | -0.03 | 0.29 | 0.088    | 0.044   | 0.5      | NA | NA | NA | NA |
| -0.37 | -0.66 | -0.03 | 0.03  | 0.29 | 0.029    | 0.49    | 0.6      | NA | NA | NA | NA |
| 0.09  | 0.05  | -0.09 | 0.05  | 0.3  | 0.75     | 0.0056  | 0.27     | NA | NA | NA | NA |
| 0.16  | 0.03  | 0.03  | -0.03 | 0.3  | 1        | 0.68    | 0.66     | NA | NA | NA | NA |
| -0.06 | 0.1   | 0.02  | -0.03 | 0.3  | 0.037    | 0.54    | 0.44     | NA | NA | NA | NA |
| 0.07  | 0.13  | -0.07 | 0.03  | 0.31 | 0.0071   | 0.0031  | 0.3      | NA | NA | NA | NA |
| -0.07 | NA    | -0.05 | 0.07  | 0.31 | NA       | 0.2     | 0.11     | NA | NA | NA | NA |
| 0.23  | 0.13  | 0.04  | 0.07  | 0.31 | 0.53     | 0.7     | 0.22     | NA | NA | NA | NA |
| 0.02  | 0.03  | 0     | 0.01  | 0.31 | 0.036    | 0.9     | 0.26     | NA | NA | NA | NA |
| 0.02  | 0.09  | -0.05 | 0.01  | 0.32 | 0.00039  | 0.0019  | 0.67     | NA | NA | NA | NA |
| 0.01  | 0.04  | -0.01 | 0.01  | 0.32 | 0.0026   | 0.32    | 0.21     | NA | NA | NA | NA |
| -0.07 | 0.09  | -0.11 | -0.19 | 0.32 | 0.16     | 0.011   | 3.10E-05 | NA | NA | NA | NA |
| -0.03 | -0.03 | -0.02 | 0.03  | 0.32 | 0.54     | 0.18    | 0.093    | NA | NA | NA | NA |
| -0.11 | -0.1  | -0.06 | -0.05 | 0.32 | 0.11     | 0.035   | 0.11     | NA | NA | NA | NA |
| 0.02  | 0.04  | -0.03 | 0.02  | 0.32 | 0.05     | 0.027   | 0.14     | NA | NA | NA | NA |
| -0.09 | 0.06  | -0.02 | 0.05  | 0.32 | 1        | 0.63    | 0.17     | NA | NA | NA | NA |
| 0.05  | 0.21  | -0.02 | 0.03  | 0.33 | 2.30E-07 | 0.47    | 0.13     | NA | NA | NA | NA |
| -0.17 | -0.08 | -0.03 | -0.06 | 0.33 | 1        | 0.74    | 0.29     | NA | NA | NA | NA |
| -0.04 | 0.01  | -0.08 | -0.02 | 0.33 | 0.98     | 0.00094 | 0.72     | NA | NA | NA | NA |
| -0.04 | 0.01  | -0.01 | 0.03  | 0.34 | 0.93     | 0.59    | 0.062    | NA | NA | NA | NA |
| -0.04 | -0.04 | -0.02 | 0.03  | 0.34 | 0.21     | 0.47    | 0.23     | NA | NA | NA | NA |
| -0.12 | -0.09 | 0.07  | 0.16  | 0.34 | 0.18     | 0.17    | 0.00014  | NA | NA | NA | NA |
| 0.06  | 0     | -0.04 | -0.02 | 0.35 | 1        | 0.28    | 0.81     | NA | NA | NA | NA |
| -0.01 | 0.05  | 0.01  | 0.03  | 0.35 | 0.0017   | 0.5     | 0.0015   | NA | NA | NA | NA |
| 0.09  | -0.01 | -0.08 | -0.09 | 0.36 | 1        | 0.0011  | 0.00046  | NA | NA | NA | NA |

|       |       |       |       |      |          |          |          |    |    |    |    |
|-------|-------|-------|-------|------|----------|----------|----------|----|----|----|----|
| 0.1   | -0.01 | -0.07 | 0.01  | 0.36 | 1        | 0.092    | 0.95     | NA | NA | NA | NA |
| 0.12  | 0.03  | -0.25 | -0.18 | 0.36 | 0.82     | 4.20E-09 | 4.70E-05 | NA | NA | NA | NA |
| 0.05  | 0.01  | -0.1  | -0.04 | 0.37 | 0.98     | 0.00031  | 0.21     | NA | NA | NA | NA |
| -0.03 | -0.01 | -0.04 | -0.01 | 0.37 | 0.76     | 0.012    | 0.6      | NA | NA | NA | NA |
| -0.88 | -0.58 | 0.05  | 0     | 0.38 | 0.94     | 0.87     | 1        | NA | NA | NA | NA |
| -0.04 | 0.03  | -0.01 | 0.01  | 0.38 | 0.51     | 0.82     | 0.67     | NA | NA | NA | NA |
| 0.03  | 0.07  | -0.03 | 0.07  | 0.39 | 0.067    | 0.18     | 0.0026   | NA | NA | NA | NA |
| 0.02  | 0.03  | -0.05 | 0.02  | 0.39 | 0.1      | 1.00E-05 | 0.27     | NA | NA | NA | NA |
| 0.04  | 0.01  | -0.01 | 0.01  | 0.39 | 0.95     | 0.41     | 0.44     | NA | NA | NA | NA |
| -0.02 | 0.06  | 0.02  | -0.01 | 0.4  | 0.00091  | 0.37     | 0.71     | NA | NA | NA | NA |
| 0.11  | 0.01  | 0.1   | -0.04 | 0.4  | 1        | 0.021    | 0.35     | NA | NA | NA | NA |
| 0.03  | 0.14  | -0.05 | -0.03 | 0.4  | 0.00014  | 0.021    | 0.17     | NA | NA | NA | NA |
| 0.24  | 0.19  | -0.04 | 0.02  | 0.4  | 0.32     | 0.27     | 0.77     | NA | NA | NA | NA |
| -0.04 | -0.08 | 0.01  | 0.02  | 0.4  | 0.11     | 0.94     | 0.62     | NA | NA | NA | NA |
| -0.03 | 0.16  | 0     | 0.04  | 0.41 | 0.0066   | 0.8      | 0.017    | NA | NA | NA | NA |
| -0.03 | 0.09  | -0.06 | -0.02 | 0.41 | 0.018    | 0.04     | 0.47     | NA | NA | NA | NA |
| -0.05 | -0.03 | 0     | -0.06 | 0.41 | 0.45     | 0.93     | 0.012    | NA | NA | NA | NA |
| 0.04  | -0.02 | -0.06 | 0.1   | 0.41 | 0.67     | 0.0056   | 0.0014   | NA | NA | NA | NA |
| 0.06  | -0.05 | 0.03  | -0.04 | 0.41 | 0.44     | 0.26     | 0.017    | NA | NA | NA | NA |
| 0.07  | 0.01  | -0.11 | 0.03  | 0.41 | 1        | 0.01     | 0.6      | NA | NA | NA | NA |
| -0.1  | -0.08 | -0.05 | -0.02 | 0.41 | 0.89     | 0.097    | 0.47     | NA | NA | NA | NA |
| 0.03  | -0.01 | -0.02 | -0.02 | 0.41 | 0.73     | 0.17     | 0.21     | NA | NA | NA | NA |
| 0.05  | 0.03  | 0.06  | 0.1   | 0.41 | 0.61     | 0.088    | 0.0061   | NA | NA | NA | NA |
| -0.04 | 0.2   | -0.1  | -0.07 | 0.42 | 6.00E-04 | 4.80E-06 | 0.0096   | NA | NA | NA | NA |
| 0.02  | 0.03  | -0.05 | 0.11  | 0.43 | 0.23     | 0.00016  | 1.60E-08 | NA | NA | NA | NA |
| 0.04  | 0.05  | -0.01 | 0.03  | 0.43 | 0.015    | 0.58     | 0.069    | NA | NA | NA | NA |
| 0.01  | -0.01 | -0.02 | 0     | 0.44 | 0.73     | 0.042    | 1        | NA | NA | NA | NA |
| -0.06 | 0.06  | -0.01 | 0.06  | 0.44 | 0.24     | 0.62     | 0.038    | NA | NA | NA | NA |
| 0.02  | 0.03  | -0.02 | 0.03  | 0.45 | 0.17     | 0.11     | 0.051    | NA | NA | NA | NA |
| 0.03  | 0.01  | -0.05 | 0.03  | 0.46 | 0.79     | 0.023    | 0.39     | NA | NA | NA | NA |



|       |       |       |       |      |          |          |          |    |    |    |    |
|-------|-------|-------|-------|------|----------|----------|----------|----|----|----|----|
| -0.06 | -0.02 | -0.02 | 0.05  | 0.46 | 1        | 0.49     | 0.088    | NA | NA | NA | NA |
| -0.02 | 0.05  | -0.03 | -0.02 | 0.46 | 0.026    | 0.23     | 0.4      | NA | NA | NA | NA |
| 0.06  | 0.06  | -0.2  | -0.03 | 0.47 | 0.33     | 0.00056  | 0.83     | NA | NA | NA | NA |
| 0.02  | 0.09  | -0.01 | 0.01  | 0.47 | 0.00022  | 0.4      | 0.3      | NA | NA | NA | NA |
| 0.05  | 0.13  | -0.04 | 0.01  | 0.48 | 0.14     | 0.43     | 0.98     | NA | NA | NA | NA |
| -0.04 | 0.05  | -0.02 | -0.02 | 0.48 | 0.64     | 0.4      | 0.28     | NA | NA | NA | NA |
| 0.01  | 0.01  | -0.06 | -0.01 | 0.48 | 0.71     | 2.60E-06 | 0.57     | NA | NA | NA | NA |
| -0.02 | 0     | -0.06 | -0.02 | 0.48 | 1        | 4.80E-05 | 0.21     | NA | NA | NA | NA |
| 0.07  | 0.07  | -0.01 | 0.05  | 0.48 | 0.43     | 0.56     | 0.061    | NA | NA | NA | NA |
| -0.01 | 0     | -0.04 | 0     | 0.49 | 0.88     | 0.00031  | 0.79     | NA | NA | NA | NA |
| -0.05 | 0.33  | -0.01 | 0.05  | 0.49 | 0.0012   | 0.67     | 0.18     | NA | NA | NA | NA |
| -0.02 | 0.02  | -0.04 | 0.06  | 0.49 | 0.56     | 0.003    | 2.80E-05 | NA | NA | NA | NA |
| 0.01  | 0.06  | -0.03 | 0.06  | 0.49 | 0.0021   | 0.19     | 0.0043   | NA | NA | NA | NA |
| -0.04 | -0.07 | -0.01 | 0.01  | 0.5  | 0.3      | 0.72     | 0.64     | NA | NA | NA | NA |
| 0.02  | 0.08  | -0.02 | 0.03  | 0.5  | 0.0079   | 0.38     | 0.14     | NA | NA | NA | NA |
| -0.03 | -0.02 | -0.05 | 0.01  | 0.51 | 0.67     | 0.0023   | 0.63     | NA | NA | NA | NA |
| -0.01 | 0.05  | -0.04 | 0     | 0.51 | 0.0061   | 0.00051  | 0.83     | NA | NA | NA | NA |
| 0.05  | 0.11  | 0.02  | 0.02  | 0.51 | 0.0053   | 0.48     | 0.45     | NA | NA | NA | NA |
| 0.12  | 0.29  | -0.07 | -0.12 | 0.51 | 0.09     | 0.18     | 0.026    | NA | NA | NA | NA |
| -0.07 | -0.06 | -0.08 | -0.05 | 0.52 | 0.51     | 0.19     | 0.51     | NA | NA | NA | NA |
| 0.02  | 0.05  | -0.02 | -0.01 | 0.52 | 0.093    | 0.27     | 0.67     | NA | NA | NA | NA |
| 0.02  | 0.07  | -0.04 | 0     | 0.52 | 0.013    | 0.018    | 0.95     | NA | NA | NA | NA |
| -0.03 | -0.03 | -0.06 | 0.02  | 0.53 | 0.79     | 0.00035  | 0.41     | NA | NA | NA | NA |
| -0.01 | 0     | -0.05 | -0.02 | 0.53 | 0.84     | 1.80E-06 | 0.076    | NA | NA | NA | NA |
| 0.03  | 0.02  | 0     | 0.03  | 0.53 | 0.73     | 1        | 0.27     | NA | NA | NA | NA |
| -0.33 | NA    | 0.03  | 0.07  | 0.54 | NA       | 0.72     | 0.31     | NA | NA | NA | NA |
| 0.03  | 0.16  | -0.01 | -0.07 | 0.54 | 6.60E-06 | 1        | 0.0069   | NA | NA | NA | NA |
| 0.04  | 0.21  | -0.08 | -0.06 | 0.54 | 1.10E-05 | 0.011    | 0.073    | NA | NA | NA | NA |
| -0.16 | 0     | -0.07 | -0.03 | 0.54 | 1        | 0.14     | 0.62     | NA | NA | NA | NA |
| 0.03  | 0.17  | -0.13 | -0.01 | 0.54 | 0.0051   | 7.00E-07 | 0.95     | NA | NA | NA | NA |

|       |       |       |       |      |         |          |          |    |    |    |    |
|-------|-------|-------|-------|------|---------|----------|----------|----|----|----|----|
| -0.17 | -0.6  | -0.21 | 0     | 0.54 | 0.015   | 0.23     | 1        | NA | NA | NA | NA |
| -0.05 | 0.1   | -0.04 | 0.03  | 0.54 | 0.28    | 0.08     | 0.17     | NA | NA | NA | NA |
| -0.02 | 0.02  | -0.01 | -0.02 | 0.54 | 0.71    | 0.59     | 0.45     | NA | NA | NA | NA |
| 0.03  | -0.04 | -0.05 | 0.02  | 0.56 | 0.1     | 0.043    | 0.41     | NA | NA | NA | NA |
| 0.01  | 0.05  | -0.03 | 0.02  | 0.56 | 0.00065 | 0.0024   | 0.014    | NA | NA | NA | NA |
| -0.02 | 0.11  | -0.05 | 0.01  | 0.57 | 0.003   | 0.031    | 0.68     | NA | NA | NA | NA |
| 0.05  | -0.01 | -0.03 | -0.02 | 0.58 | 0.93    | 0.2      | 0.21     | NA | NA | NA | NA |
| 0.01  | 0     | -0.02 | 0     | 0.58 | 1       | 0.42     | 0.91     | NA | NA | NA | NA |
| 0.03  | -0.03 | -0.03 | 0.01  | 0.59 | 0.53    | 0.15     | 0.59     | NA | NA | NA | NA |
| 0.02  | 0.03  | -0.03 | -0.04 | 0.59 | 0.45    | 0.3      | 0.17     | NA | NA | NA | NA |
| -0.07 | -0.09 | -0.1  | -0.01 | 0.6  | 0.13    | 0.00043  | 0.77     | NA | NA | NA | NA |
| 0.06  | 0.19  | -0.06 | -0.07 | 0.6  | 0.043   | 0.025    | 0.01     | NA | NA | NA | NA |
| -0.01 | 0     | -0.06 | -0.02 | 0.61 | 1       | 1.50E-06 | 0.14     | NA | NA | NA | NA |
| -0.01 | 0.02  | -0.06 | -0.05 | 0.61 | 0.33    | 7.70E-06 | 0.00017  | NA | NA | NA | NA |
| -0.01 | 0.04  | -0.04 | 0.02  | 0.62 | 0.018   | 0.002    | 0.26     | NA | NA | NA | NA |
| -0.03 | 0.05  | 0.05  | -0.01 | 0.62 | 1       | 0.39     | 0.84     | NA | NA | NA | NA |
| 0.01  | 0.05  | -0.02 | -0.01 | 0.62 | 0.003   | 0.28     | 0.6      | NA | NA | NA | NA |
| -0.06 | -0.04 | -0.08 | 0.04  | 0.62 | 0.82    | 0.22     | 0.32     | NA | NA | NA | NA |
| 0.07  | -0.05 | -0.02 | -0.04 | 0.63 | 0.52    | 0.57     | 0.12     | NA | NA | NA | NA |
| -0.01 | -0.02 | 0.02  | 0.04  | 0.64 | 0.27    | 0.17     | 0.00087  | NA | NA | NA | NA |
| -0.02 | -0.03 | -0.03 | 0.02  | 0.64 | 0.3     | 0.079    | 0.2      | NA | NA | NA | NA |
| 0.07  | 0.34  | 0.01  | 0.14  | 0.65 | 0.00094 | 1        | 9.60E-05 | NA | NA | NA | NA |
| -0.02 | 0.04  | 0.02  | 0     | 0.65 | 0.15    | 0.26     | 0.95     | NA | NA | NA | NA |
| 0.03  | 0.09  | -0.04 | 0.09  | 0.66 | 0.3     | 0.29     | 0.012    | NA | NA | NA | NA |
| 0.02  | 0     | -0.07 | -0.05 | 0.67 | 1       | 0.0011   | 0.031    | NA | NA | NA | NA |
| -0.03 | 0.02  | -0.01 | 0.04  | 0.67 | 0.68    | 0.38     | 0.018    | NA | NA | NA | NA |
| 0.02  | -0.01 | 0.01  | 0.04  | 0.68 | 0.64    | 0.7      | 0.0057   | NA | NA | NA | NA |
| -0.03 | 0.34  | -0.02 | 0.01  | 0.68 | 0.00015 | 0.49     | 0.84     | NA | NA | NA | NA |
| -0.06 | 0.15  | -0.1  | 0     | 0.69 | 0.36    | 0.097    | 1        | NA | NA | NA | NA |
| -0.02 | 0.05  | -0.03 | 0.01  | 0.7  | 0.05    | 0.27     | 0.9      | NA | NA | NA | NA |

|       |       |       |       |      |         |          |          |    |    |    |    |
|-------|-------|-------|-------|------|---------|----------|----------|----|----|----|----|
| -0.04 | -0.07 | 0.03  | 0.01  | 0.71 | 1       | 0.43     | 0.89     | NA | NA | NA | NA |
| -0.02 | 0.01  | 0.01  | 0.09  | 0.72 | 0.96    | 0.69     | 0.00069  | NA | NA | NA | NA |
| 0.01  | 0.06  | -0.04 | 0.03  | 0.72 | 0.013   | 0.0015   | 0.12     | NA | NA | NA | NA |
| 0.04  | -0.01 | 0     | -0.02 | 0.72 | 0.96    | 1        | 0.52     | NA | NA | NA | NA |
| -0.04 | 0.06  | -0.07 | -0.03 | 0.72 | 0.014   | 0.00013  | 0.12     | NA | NA | NA | NA |
| 0.03  | 0.01  | -0.1  | -0.04 | 0.73 | 0.69    | 0.00042  | 0.19     | NA | NA | NA | NA |
| 0.07  | 0.06  | 0.03  | 0.09  | 0.73 | 0.3     | 0.45     | 0.033    | NA | NA | NA | NA |
| 0.03  | 0.05  | -0.01 | 0.01  | 0.74 | 0.39    | 0.63     | 0.76     | NA | NA | NA | NA |
| 0.14  | 0.08  | 0.04  | 0.14  | 0.75 | 0.13    | 0.17     | 1.30E-05 | NA | NA | NA | NA |
| -0.01 | 0.02  | -0.03 | 0.04  | 0.76 | 0.54    | 0.13     | 0.043    | NA | NA | NA | NA |
| 0.09  | 0.48  | 0.05  | 0.07  | 0.76 | 0.057   | 0.73     | 0.62     | NA | NA | NA | NA |
| 0.13  | 0.47  | 0.02  | -0.18 | 0.76 | 0.18    | 1        | 0.034    | NA | NA | NA | NA |
| -0.01 | 0.02  | -0.07 | -0.05 | 0.76 | 0.53    | 8.10E-05 | 0.0061   | NA | NA | NA | NA |
| 0.04  | NA    | -0.08 | 0.02  | 0.77 | NA      | 0.13     | 0.95     | NA | NA | NA | NA |
| -0.01 | 0.05  | -0.02 | -0.01 | 0.77 | 0.00096 | 0.036    | 0.32     | NA | NA | NA | NA |
| 0.01  | 0.03  | -0.04 | 0.01  | 0.78 | 0.15    | 0.0046   | 0.36     | NA | NA | NA | NA |
| 0.21  | 0.38  | -0.08 | -0.03 | 0.78 | 0.28    | 0.033    | 0.77     | NA | NA | NA | NA |
| 0.02  | 0.07  | 0     | 0.09  | 0.78 | 0.18    | 0.99     | 7.50E-05 | NA | NA | NA | NA |
| -0.67 | -0.67 | -0.06 | 0.1   | 0.79 | 0.88    | 0.041    | 0.027    | NA | NA | NA | NA |
| 0.01  | 0.01  | -0.05 | -0.02 | 0.79 | 0.82    | 0.059    | 0.37     | NA | NA | NA | NA |
| 0.15  | 0.02  | -0.05 | -0.09 | 0.8  | 1       | 0.52     | 0.11     | NA | NA | NA | NA |
| 0.02  | 0.17  | -0.01 | 0     | 0.8  | 0.049   | 0.92     | 0.97     | NA | NA | NA | NA |
| 0.04  | 0.03  | 0.03  | -0.05 | 0.8  | 0.87    | 0.84     | 0.27     | NA | NA | NA | NA |
| 0.01  | 0.11  | -0.04 | 0.04  | 0.81 | 0.0018  | 0.004    | 0.013    | NA | NA | NA | NA |
| -0.13 | -0.12 | -0.1  | -0.13 | 0.81 | 0.69    | 0.00095  | 0.00092  | NA | NA | NA | NA |
| 0.03  | -0.03 | -0.07 | 0     | 0.82 | 0.6     | 0.0058   | 1        | NA | NA | NA | NA |
| -0.03 | 0.03  | 0     | 0.05  | 0.83 | 0.93    | 1        | 0.12     | NA | NA | NA | NA |
| -0.03 | -0.06 | -0.08 | -0.06 | 0.83 | 0.36    | 0.021    | 0.06     | NA | NA | NA | NA |
| -0.03 | 0.12  | -0.06 | 0.01  | 0.83 | 0.17    | 0.00014  | 0.78     | NA | NA | NA | NA |
| -0.17 | 0.33  | 0.04  | -0.1  | 0.84 | 0.81    | 0.56     | 0.036    | NA | NA | NA | NA |

|       |       |       |       |      |          |          |          |    |    |    |    |
|-------|-------|-------|-------|------|----------|----------|----------|----|----|----|----|
| 0.01  | 0.01  | -0.06 | 0     | 0.84 | 0.67     | 1.10E-05 | 0.88     | NA | NA | NA | NA |
| -0.01 | 0.02  | -0.06 | -0.03 | 0.86 | 0.37     | 0.00033  | 0.18     | NA | NA | NA | NA |
| 0     | 0.03  | -0.02 | 0.01  | 0.87 | 0.07     | 0.045    | 0.41     | NA | NA | NA | NA |
| 0.05  | -0.01 | -0.04 | -0.01 | 0.87 | 0.99     | 0.042    | 0.61     | NA | NA | NA | NA |
| 0.16  | 0.24  | -0.01 | 0.09  | 0.87 | 0.26     | 0.89     | 0.098    | NA | NA | NA | NA |
| -0.01 | 0.13  | -0.02 | 0.13  | 0.87 | 0.024    | 0.38     | 3.20E-07 | NA | NA | NA | NA |
| -0.02 | 0     | 0     | 0.1   | 0.87 | 1        | 1        | 0.00019  | NA | NA | NA | NA |
| 0.01  | -0.01 | -0.06 | 0.02  | 0.88 | 0.94     | 0.00046  | 0.35     | NA | NA | NA | NA |
| 0.01  | -0.01 | 0.02  | 0.03  | 0.88 | 0.79     | 0.25     | 0.073    | NA | NA | NA | NA |
| 0     | 0.01  | -0.01 | 0.01  | 0.88 | 0.82     | 0.36     | 0.51     | NA | NA | NA | NA |
| 0.02  | 0.01  | -0.05 | 0     | 0.88 | 1        | 0.064    | 1        | NA | NA | NA | NA |
| 0.01  | 0     | -0.02 | 0.06  | 0.88 | 1        | 0.26     | 3.30E-05 | NA | NA | NA | NA |
| -0.01 | 0.13  | -0.02 | 0     | 0.89 | 0.0019   | 0.45     | 1        | NA | NA | NA | NA |
| -0.01 | -0.03 | -0.04 | -0.02 | 0.89 | 0.15     | 0.0015   | 0.12     | NA | NA | NA | NA |
| -0.01 | 0.12  | -0.06 | -0.03 | 0.9  | 0.02     | 0.023    | 0.27     | NA | NA | NA | NA |
| 0.01  | 0.02  | -0.03 | -0.01 | 0.9  | 0.66     | 0.036    | 0.67     | NA | NA | NA | NA |
| 0.06  | -0.02 | -0.01 | 0.02  | 0.9  | 1        | 0.83     | 0.78     | NA | NA | NA | NA |
| 0.02  | -0.01 | 0     | -0.03 | 0.9  | 0.92     | 0.94     | 0.12     | NA | NA | NA | NA |
| -0.06 | -0.08 | -0.03 | 0.03  | 0.9  | 0.6      | 0.097    | 0.21     | NA | NA | NA | NA |
| 0.05  | -0.04 | 0     | 0.15  | 0.91 | 0.98     | 1        | 0.001    | NA | NA | NA | NA |
| 0.02  | 0.18  | -0.03 | -0.11 | 0.91 | 0.026    | 0.8      | 0.0025   | NA | NA | NA | NA |
| 0     | 0.09  | 0.01  | 0.03  | 0.92 | 9.70E-06 | 0.47     | 0.19     | NA | NA | NA | NA |
| 0.01  | -0.05 | -0.05 | 0.04  | 0.93 | 0.093    | 0.023    | 0.13     | NA | NA | NA | NA |
| 0.01  | -0.01 | 0.02  | 0.02  | 0.93 | 0.78     | 0.56     | 0.38     | NA | NA | NA | NA |
| 0.02  | NA    | -0.05 | -0.06 | 0.93 | NA       | 0.14     | 0.05     | NA | NA | NA | NA |
| 0.02  | -0.02 | -0.03 | -0.03 | 0.93 | 0.91     | 0.47     | 0.45     | NA | NA | NA | NA |
| -0.01 | 0.13  | -0.02 | 0.03  | 0.93 | 7.00E-05 | 0.19     | 0.13     | NA | NA | NA | NA |
| 0.21  | 0.21  | 0.11  | 0.14  | 0.94 | 0.22     | 0.24     | 0.17     | NA | NA | NA | NA |
| 0.02  | -0.03 | -0.05 | 0.03  | 0.94 | 0.86     | 0.099    | 0.53     | NA | NA | NA | NA |
| -0.01 | 0.1   | -0.05 | 0     | 0.95 | 0.025    | 0.047    | 1        | NA | NA | NA | NA |

|       |       |       |       |      |          |          |          |    |    |    |    |
|-------|-------|-------|-------|------|----------|----------|----------|----|----|----|----|
| 0.02  | 0.03  | -0.03 | 0.1   | 0.95 | 0.87     | 0.23     | 0.0051   | NA | NA | NA | NA |
| 0.01  | -0.08 | 0     | 0.12  | 0.96 | 0.21     | 1        | 8.10E-06 | NA | NA | NA | NA |
| 0     | 0.04  | -0.05 | 0.03  | 0.96 | 0.016    | 7.30E-05 | 0.039    | NA | NA | NA | NA |
| -0.01 | 0.21  | -0.06 | 0.01  | 0.96 | 2.50E-06 | 0.0036   | 0.65     | NA | NA | NA | NA |
| -0.01 | 0.17  | -0.04 | 0     | 0.96 | 0.012    | 0.043    | 0.95     | NA | NA | NA | NA |
| -0.01 | 0.14  | -0.04 | 0     | 0.96 | 7.90E-05 | 0.0019   | 0.86     | NA | NA | NA | NA |
| 0.01  | 0.02  | 0     | 0.01  | 0.97 | 0.85     | 1        | 0.71     | NA | NA | NA | NA |
| -0.03 | NA    | -0.07 | 0.09  | 0.97 | NA       | 0.15     | 0.078    | NA | NA | NA | NA |
| 0.01  | 0     | -0.06 | -0.01 | 0.99 | 1        | 0.015    | 0.66     | NA | NA | NA | NA |
| -0.04 | 0.02  | -0.03 | -0.01 | 0.99 | 0.76     | 0.44     | 0.88     | NA | NA | NA | NA |
| -0.02 | 0.36  | 0.02  | 0.04  | 1    | 3.50E-05 | 0.67     | 0.37     | NA | NA | NA | NA |
| 0.02  | 0.06  | -0.08 | -0.05 | 1    | 0.78     | 0.015    | 0.13     | NA | NA | NA | NA |
| 0.02  | NA    | -0.05 | -0.02 | 1    | NA       | 0.33     | 0.58     | NA | NA | NA | NA |
| 0.06  | 0.04  | -0.01 | 0.08  | 1    | 0.43     | 0.68     | 2.00E-04 | NA | NA | NA | NA |
| 0.01  | 0.01  | -0.05 | -0.05 | 1    | 1        | 0.0035   | 0.042    | NA | NA | NA | NA |
| -0.01 | 0.15  | -0.02 | 0.04  | 1    | 0.002    | 0.41     | 0.043    | NA | NA | NA | NA |
| 0     | 0.41  | -0.08 | -0.01 | 1    | 0.00012  | 0.00051  | 0.73     | NA | NA | NA | NA |
| 0     | 0.15  | 0     | 0.05  | 1    | 0.011    | 0.95     | 0.055    | NA | NA | NA | NA |
| 0     | 0     | -0.01 | 0.01  | 1    | 1        | 0.51     | 0.54     | NA | NA | NA | NA |
| 0     | NA    | -0.08 | -0.15 | 1    | NA       | 0.24     | 0.0057   | NA | NA | NA | NA |
| 0.01  | 0.02  | -0.05 | 0.12  | 1    | 1        | 0.033    | 0.00049  | NA | NA | NA | NA |
| -0.04 | 0     | -0.1  | -0.07 | 1    | 1        | 0.18     | 0.074    | NA | NA | NA | NA |
| 0     | 0.08  | -0.06 | -0.01 | 1    | 0.034    | 0.013    | 0.8      | NA | NA | NA | NA |
| 0.04  | -0.01 | -0.01 | 0     | 1    | 1        | 0.72     | 1        | NA | NA | NA | NA |
| -0.01 | 0.3   | -0.06 | -0.04 | 1    | 2.70E-05 | 0.021    | 0.18     | NA | NA | NA | NA |
| 0     | 0.09  | -0.05 | 0.01  | 1    | 3.70E-07 | 0.019    | 0.76     | NA | NA | NA | NA |
| 0     | 0.11  | 0     | 0.08  | 1    | 0.074    | 1        | 0.028    | NA | NA | NA | NA |
| 0.01  | 0     | -0.05 | 0.02  | 1    | 1        | 0.034    | 0.66     | NA | NA | NA | NA |
| -0.01 | 0.22  | 0     | 0.02  | 1    | 0.037    | 1        | 0.55     | NA | NA | NA | NA |
| 0.03  | 0.41  | -0.06 | -0.01 | 1    | 2.70E-05 | 0.43     | 0.94     | NA | NA | NA | NA |

|       |       |       |       |   |          |          |          |    |    |    |    |
|-------|-------|-------|-------|---|----------|----------|----------|----|----|----|----|
| 0     | -0.85 | -0.01 | 0.36  | 1 | 5.30E-06 | 0.99     | 0.039    | NA | NA | NA | NA |
| 0     | 0.05  | -0.03 | -0.02 | 1 | 0.12     | 0.2      | 0.25     | NA | NA | NA | NA |
| 0     | 0.03  | 0.04  | 0.06  | 1 | 0.56     | 0.0058   | 0.00038  | NA | NA | NA | NA |
| -0.1  | -0.4  | 0.12  | -0.06 | 1 | 0.89     | 0.34     | 0.71     | NA | NA | NA | NA |
| -0.02 | NA    | -0.05 | 0.05  | 1 | NA       | 0.042    | 0.17     | NA | NA | NA | NA |
| 0.01  | 0.11  | -0.03 | -0.04 | 1 | 0.012    | 0.11     | 0.036    | NA | NA | NA | NA |
| 0     | 0.06  | 0.01  | 0.01  | 1 | 0.061    | 0.71     | 0.69     | NA | NA | NA | NA |
| 0.03  | 0.05  | -0.1  | -0.05 | 1 | 0.94     | 0.23     | 0.68     | NA | NA | NA | NA |
| 0     | 0.27  | -0.16 | 0.21  | 1 | 5.90E-08 | 4.00E-06 | 4.00E-09 | NA | NA | NA | NA |
| 0.5   | 0.3   | -0.06 | 0.06  | 1 | 0.51     | 0.31     | 0.46     | NA | NA | NA | NA |
| 0.17  | 0.5   | -0.22 | -0.05 | 1 | 0.7      | 0.00073  | 0.7      | NA | NA | NA | NA |
| 0     | 0.2   | 0     | 0.05  | 1 | 0.00051  | 0.91     | 0.014    | NA | NA | NA | NA |
| 0.01  | 0.01  | 0.01  | 0.06  | 1 | 1        | 0.93     | 0.059    | NA | NA | NA | NA |
| 0.04  | 0.09  | 0.05  | 0     | 1 | 0.57     | 0.63     | 1        | NA | NA | NA | NA |
| 0     | 0.14  | -0.04 | 0.01  | 1 | 0.032    | 0.44     | 0.85     | NA | NA | NA | NA |
| 0.01  | 0.06  | -0.02 | -0.01 | 1 | 0.64     | 0.6      | 0.75     | NA | NA | NA | NA |
| -0.02 | 0.17  | -0.01 | 0.04  | 1 | 0.021    | 0.83     | 0.079    | NA | NA | NA | NA |
| 0     | -0.02 | -0.01 | 0.03  | 1 | 1        | 0.69     | 0.44     | NA | NA | NA | NA |
| -0.67 | NA    | NA    | NA    | 1 | NA       | NA       | NA       | NA | NA | NA | NA |
| 0.19  | -0.05 | -0.14 | -0.01 | 1 | 1        | 0.00055  | 1        | NA | NA | NA | NA |
| -0.01 | -0.04 | 0.11  | 0.07  | 1 | 0.65     | 0.0026   | 0.0077   | NA | NA | NA | NA |
| -0.01 | -0.07 | 0.01  | -0.02 | 1 | 0.31     | 0.82     | 0.48     | NA | NA | NA | NA |
| 0     | 0.1   | -0.05 | 0.01  | 1 | 0.052    | 0.095    | 0.74     | NA | NA | NA | NA |
| 0.01  | 0.05  | 0.03  | 0.15  | 1 | 0.65     | 0.27     | 1.60E-06 | NA | NA | NA | NA |
| 0     | 0.19  | -0.01 | -0.02 | 1 | 1.90E-06 | 0.7      | 0.46     | NA | NA | NA | NA |
| 0     | 0.02  | -0.02 | 0     | 1 | 0.65     | 0.27     | 0.85     | NA | NA | NA | NA |
| 0.01  | 0.03  | 0.02  | -0.02 | 1 | 0.86     | 0.84     | 0.76     | NA | NA | NA | NA |
| 0     | 0.03  | -0.05 | 0.04  | 1 | 0.76     | 0.024    | 0.15     | NA | NA | NA | NA |
| -0.05 | -0.11 | -0.04 | 0.01  | 1 | 0.34     | 0.14     | 0.77     | NA | NA | NA | NA |
| 0.08  | 0.11  | -0.01 | 0.1   | 1 | 0.72     | 0.83     | 0.0049   | NA | NA | NA | NA |

|       |       |       |       |    |          |          |          |    |    |    |    |
|-------|-------|-------|-------|----|----------|----------|----------|----|----|----|----|
| 0     | 0.19  | -0.04 | 0.03  | 1  | 6.80E-07 | 0.013    | 0.079    | NA | NA | NA | NA |
| 0     | 0.01  | -0.05 | 0     | 1  | 0.75     | 0.0065   | 1        | NA | NA | NA | NA |
| 0.01  | 0.02  | 0.05  | 0.06  | 1  | 1        | 0.48     | 0.24     | NA | NA | NA | NA |
| 0.09  | NA    | 0.03  | NA    | 1  | NA       | 0.83     | NA       | NA | NA | NA | NA |
| -0.02 | -0.04 | -0.05 | -0.02 | 1  | 1        | 0.081    | 0.72     | NA | NA | NA | NA |
| -0.06 | 0.16  | -0.13 | 0.08  | 1  | 0.32     | 3.10E-06 | 0.076    | NA | NA | NA | NA |
| 0     | 0.07  | -0.07 | 0.02  | 1  | 0.051    | 2.50E-05 | 0.5      | NA | NA | NA | NA |
| 0     | 0.09  | -0.03 | -0.03 | 1  | 0.0029   | 0.048    | 0.068    | NA | NA | NA | NA |
| 0.08  | 0     | -0.02 | 0.05  | 1  | 1        | 0.72     | 0.089    | NA | NA | NA | NA |
| 0.06  | 0.04  | -0.07 | 0.12  | 1  | 0.98     | 0.55     | 0.39     | NA | NA | NA | NA |
| 0     | 0.04  | -0.12 | -0.13 | 1  | 0.91     | 0.087    | 0.055    | NA | NA | NA | NA |
| 0.01  | -0.03 | -0.04 | 0.01  | 1  | 0.92     | 0.091    | 0.79     | NA | NA | NA | NA |
| 0     | 0.04  | 0     | -0.01 | 1  | 0.19     | 1        | 0.79     | NA | NA | NA | NA |
| 0     | -0.01 | 0     | -0.01 | 1  | 0.6      | 1        | 0.77     | NA | NA | NA | NA |
| 0.03  | NA    | -0.06 | 0.1   | 1  | NA       | 0.52     | 0.2      | NA | NA | NA | NA |
| 0     | 0.03  | -0.03 | 0     | 1  | 0.053    | 0.023    | 0.93     | NA | NA | NA | NA |
| -0.01 | NA    | -0.14 | 0.02  | 1  | NA       | 4.10E-05 | 0.65     | NA | NA | NA | NA |
| -0.01 | 0.01  | -0.08 | 0     | 1  | 1        | 0.011    | 0.96     | NA | NA | NA | NA |
| 0.07  | 0.06  | -0.13 | -0.05 | 1  | 0.65     | 0.00039  | 0.26     | NA | NA | NA | NA |
| -0.03 | 0.35  | -0.06 | 0.15  | 1  | 1.10E-05 | 0.094    | 9.20E-05 | NA | NA | NA | NA |
| 0.01  | 0     | -0.05 | -0.13 | 1  | 1        | 0.02     | 3.50E-05 | NA | NA | NA | NA |
| 0.17  | -0.12 | -0.06 | 0.05  | 1  | 1        | 0.14     | 0.57     | NA | NA | NA | NA |
| -0.02 | 0.01  | -0.04 | -0.02 | 1  | 1        | 0.049    | 0.51     | NA | NA | NA | NA |
| -0.02 | -0.01 | 0.03  | 0.05  | 1  | 1        | 0.47     | 0.086    | NA | NA | NA | NA |
| NA    | NA    | -0.04 | 0.07  | NA | NA       | 0.83     | 0.9      | NA | NA | NA | NA |
| NA    | NA    | -0.05 | 0.33  | NA | NA       | 0.8      | 0.014    | NA | NA | NA | NA |
| NA    | NA    | -0.08 | -0.05 | NA | NA       | 0.075    | 0.46     | NA | NA | NA | NA |
| NA    | NA    | -0.05 | -0.03 | NA | NA       | 0.77     | 0.93     | NA | NA | NA | NA |
| NA    | NA    | -0.03 | 0.21  | NA | NA       | 0.93     | 0.13     | NA | NA | NA | NA |
| NA    | NA    | -0.18 | 0.01  | NA | NA       | 3.30E-09 | 1        | NA | NA | NA | NA |

|    |       |       |       |    |          |          |         |    |    |    |    |
|----|-------|-------|-------|----|----------|----------|---------|----|----|----|----|
| NA | NA    | NA    | NA    | NA | NA       | NA       | NA      | NA | NA | NA | NA |
| NA | NA    | -0.13 | -0.08 | NA | NA       | 0.00025  | 0.032   | NA | NA | NA | NA |
| NA | 0.76  | -0.03 | -0.05 | NA | 1.00E-05 | 0.55     | 0.15    | NA | NA | NA | NA |
| NA | -0.5  | -0.02 | 0     | NA | 0.56     | 0.82     | 1       | NA | NA | NA | NA |
| NA | NA    | 0.04  | NA    | NA | NA       | 1        | NA      | NA | NA | NA | NA |
| NA | NA    | 0.09  | NA    | NA | NA       | 1        | NA      | NA | NA | NA | NA |
| NA | -0.01 | -0.08 | -0.04 | NA | 0.98     | 0.013    | 0.26    | NA | NA | NA | NA |
| NA | NA    | 0.02  | 0.16  | NA | NA       | 0.81     | 0.0036  | NA | NA | NA | NA |
| NA | -0.02 | 0     | -0.04 | NA | 0.93     | 1        | 0.5     | NA | NA | NA | NA |
| NA | NA    | NA    | -0.06 | NA | NA       | NA       | 0.86    | NA | NA | NA | NA |
| NA | -0.13 | 0.15  | NA    | NA | 1        | 0.26     | NA      | NA | NA | NA | NA |
| NA | NA    | -0.12 | -0.07 | NA | NA       | 7.70E-05 | 0.073   | NA | NA | NA | NA |
| NA | NA    | -0.13 | NA    | NA | NA       | 0.047    | NA      | NA | NA | NA | NA |
| NA | NA    | -0.09 | NA    | NA | NA       | 0.0039   | NA      | NA | NA | NA | NA |
| NA | NA    | -0.06 | NA    | NA | NA       | 0.92     | NA      | NA | NA | NA | NA |
| NA | NA    | 0     | NA    | NA | NA       | 1        | NA      | NA | NA | NA | NA |
| NA | NA    | NA    | NA    | NA | NA       | NA       | NA      | NA | NA | NA | NA |
| NA | NA    | NA    | NA    | NA | NA       | NA       | NA      | NA | NA | NA | NA |
| NA | NA    | -0.08 | -0.06 | NA | NA       | 0.15     | 0.24    | NA | NA | NA | NA |
| NA | NA    | -0.03 | 0.13  | NA | NA       | 0.15     | 0.00083 | NA | NA | NA | NA |
| NA | NA    | -0.15 | -0.02 | NA | NA       | 0.0024   | 0.82    | NA | NA | NA | NA |
| NA | NA    | 0.12  | NA    | NA | NA       | 0.35     | NA      | NA | NA | NA | NA |
| NA | NA    | -0.09 | -0.08 | NA | NA       | 0.22     | 0.013   | NA | NA | NA | NA |
| NA | 0.08  | -0.04 | -0.02 | NA | 1        | 0.71     | 0.91    | NA | NA | NA | NA |
| NA | -0.04 | -0.01 | 0     | NA | 0.65     | 1        | 1       | NA | NA | NA | NA |
| NA | NA    | NA    | 0.89  | NA | NA       | NA       | 0.43    | NA | NA | NA | NA |
| NA | NA    | -0.02 | NA    | NA | NA       | 1        | NA      | NA | NA | NA | NA |
| NA | 0.03  | -0.01 | -0.04 | NA | 1        | 0.85     | 0.064   | NA | NA | NA | NA |
| NA | NA    | -0.24 | 0.05  | NA | NA       | 0.014    | 0.68    | NA | NA | NA | NA |
| NA | 0.03  | 0.08  | 0.02  | NA | 0.91     | 0.11     | 0.91    | NA | NA | NA | NA |



|      |       |       |       |          |       |         |          |    |    |    |    |
|------|-------|-------|-------|----------|-------|---------|----------|----|----|----|----|
| NA   | NA    | -0.02 | NA    | NA       | NA    | 0.92    | NA       | NA | NA | NA | NA |
| NA   | 0.05  | 0     | 0.02  | NA       | 1     | 1       | 0.62     | NA | NA | NA | NA |
| NA   | NA    | 0.5   | 0.5   | NA       | NA    | 1       | 0.024    | NA | NA | NA | NA |
| NA   | NA    | 0.13  | NA    | NA       | NA    | 0.36    | NA       | NA | NA | NA | NA |
| NA   | -0.88 | 0.03  | 0.07  | NA       | 0.023 | 0.35    | 0.017    | NA | NA | NA | NA |
| NA   | NA    | 0.02  | 0.11  | NA       | NA    | 0.82    | 0.21     | NA | NA | NA | NA |
| NA   | 0.06  | 0.01  | 0.04  | NA       | 0.23  | 0.69    | 0.095    | NA | NA | NA | NA |
| NA   | 0.17  | -0.09 | -0.1  | NA       | 0.85  | 0.095   | 0.39     | NA | NA | NA | NA |
| NA   | 0.5   | -0.34 | 0.44  | NA       | 0.32  | 0.00019 | 0.0011   | NA | NA | NA | NA |
| NA   | NA    | 0.17  | 0.03  | NA       | NA    | 0.0071  | 0.68     | NA | NA | NA | NA |
| NA   | NA    | 0.05  | NA    | NA       | NA    | 0.78    | NA       | NA | NA | NA | NA |
| NA   | NA    | NA    | NA    | NA       | NA    | NA      | NA       | NA | NA | NA | NA |
| NA   | NA    | NA    | NA    | NA       | NA    | NA      | NA       | NA | NA | NA | NA |
| NA   | 0.3   | -0.09 | -0.06 | NA       | 0.55  | 0.012   | 0.076    | NA | NA | NA | NA |
| NA   | 0.53  | 0.02  | 0.32  | NA       | 0.07  | 0.85    | 2.40E-06 | NA | NA | NA | NA |
| NA   | NA    | -0.32 | NA    | NA       | NA    | 0.39    | NA       | NA | NA | NA | NA |
| NA   | NA    | -0.1  | 0.06  | NA       | NA    | 0.037   | 0.49     | NA | NA | NA | NA |
| NA   | NA    | 0.06  | -0.06 | NA       | NA    | 0.72    | 0.77     | NA | NA | NA | NA |
| NA   | NA    | 0.07  | NA    | NA       | NA    | 0.62    | NA       | NA | NA | NA | NA |
| NA   | NA    | -0.23 | NA    | NA       | NA    | 0.00041 | NA       | NA | NA | NA | NA |
| NA   | NA    | -0.05 | NA    | NA       | NA    | 0.41    | NA       | NA | NA | NA | NA |
| NA   | NA    | -0.06 | -0.06 | NA       | NA    | 0.0022  | 0.00038  | NA | NA | NA | NA |
| NA   | 0.02  | -0.15 | -0.09 | NA       | 0.93  | 0.00014 | 0.17     | NA | NA | NA | NA |
| NA   | NA    | -0.1  | NA    | NA       | NA    | 0.21    | NA       | NA | NA | NA | NA |
| NA   | NA    | -0.07 | NA    | NA       | NA    | 0.57    | NA       | NA | NA | NA | NA |
| NA   | NA    | -0.12 | 0.68  | NA       | NA    | 0.39    | 0.026    | NA | NA | NA | NA |
| NA   | NA    | -0.03 | 0.1   | NA       | NA    | 0.66    | 0.043    | NA | NA | NA | NA |
| NA   | -0.92 | -0.03 | -0.04 | NA       | 0.037 | 0.63    | 0.46     | NA | NA | NA | NA |
| 0.69 | 0.04  | -0.08 | 0.04  | 1.90E-09 | 0.66  | 0.006   | 0.32     | NA | NA | NA | NA |

|       |       |       |       |          |          |          |          |    |    |    |    |
|-------|-------|-------|-------|----------|----------|----------|----------|----|----|----|----|
| 0.63  | 0.46  | -0.11 | -0.12 | 4.30E-09 | 2.10E-05 | 7.60E-06 | 1.50E-06 | NA | NA | NA | NA |
| 0.3   | -0.03 | -0.13 | -0.1  | 1.10E-08 | 0.49     | 5.10E-06 | 0.00021  | NA | NA | NA | NA |
| 0.59  | -0.05 | -0.01 | 0.08  | 1.90E-08 | 0.2      | 0.67     | 0.00068  | NA | NA | NA | NA |
| 0.14  | 0     | -0.08 | -0.07 | 1.00E-07 | 0.84     | 3.00E-08 | 2.60E-07 | NA | NA | NA | NA |
| 0.31  | 0.11  | 0     | -0.02 | 1.10E-07 | 0.063    | 0.98     | 0.66     | NA | NA | NA | NA |
| 0.18  | 0.05  | -0.05 | 0     | 1.20E-07 | 0.026    | 0.0094   | 0.87     | NA | NA | NA | NA |
| 0.29  | 0.04  | -0.01 | 0.05  | 2.10E-07 | 0.35     | 0.8      | 0.018    | NA | NA | NA | NA |
| -0.52 | -0.46 | 0.02  | 0.01  | 3.70E-07 | 0.13     | 0.72     | 0.96     | NA | NA | NA | NA |
| 0.31  | 0.09  | 0     | -0.02 | 3.80E-07 | 0.039    | 0.99     | 0.57     | NA | NA | NA | NA |
| 0.21  | 0.11  | -0.01 | 0.06  | 3.90E-07 | 0.00018  | 0.48     | 0.00032  | NA | NA | NA | NA |
| 0.17  | 0.06  | -0.07 | 0.02  | 4.10E-07 | 0.0065   | 3.30E-05 | 0.38     | NA | NA | NA | NA |
| 0.14  | 0.02  | 0.01  | 0.02  | 4.90E-07 | 0.25     | 0.45     | 0.067    | NA | NA | NA | NA |
| 0.22  | 0.22  | -0.03 | 0.11  | 9.20E-07 | 6.50E-07 | 0.18     | 3.50E-06 | NA | NA | NA | NA |
| 0.2   | 0.08  | -0.01 | 0.07  | 1.00E-06 | 0.005    | 0.42     | 0.00044  | NA | NA | NA | NA |
| 0.11  | 0.06  | 0     | 0.01  | 1.30E-06 | 0.00015  | 0.82     | 0.45     | NA | NA | NA | NA |
| 0.06  | 0.04  | -0.05 | -0.01 | 1.30E-06 | 0.00037  | 0.00011  | 0.32     | NA | NA | NA | NA |
| 0.33  | 0.15  | 0.04  | 0.03  | 1.40E-06 | 0.01     | 0.062    | 0.085    | NA | NA | NA | NA |
| 0.23  | 0.05  | 0.02  | -0.01 | 1.50E-06 | 0.096    | 0.38     | 0.59     | NA | NA | NA | NA |
| 0.35  | 0.1   | -0.06 | 0.05  | 3.40E-06 | 0.16     | 0.00017  | 0.013    | NA | NA | NA | NA |
| 0.14  | 0.14  | 0.03  | 0.07  | 4.10E-06 | 2.10E-09 | 0.13     | 1.00E-04 | NA | NA | NA | NA |
| -0.06 | -0.01 | -0.02 | -0.02 | 4.10E-06 | 0.57     | 0.25     | 0.37     | NA | NA | NA | NA |
| 0.94  | NA    | 0.03  | 0.11  | 7.10E-06 | NA       | 0.61     | 0.0025   | NA | NA | NA | NA |
| 0.71  | 0     | 0.03  | 0.05  | 8.50E-06 | 1        | 0.19     | 0.02     | NA | NA | NA | NA |
| 0.34  | 0.1   | -0.05 | 0.09  | 8.70E-06 | 0.0031   | 0.026    | 0.00039  | NA | NA | NA | NA |
| 0.71  | -0.03 | 0.04  | 0.01  | 1.00E-05 | 1        | 0.26     | 1        | NA | NA | NA | NA |
| 0.38  | -0.04 | -0.01 | 0.06  | 1.10E-05 | 0.25     | 0.72     | 0.035    | NA | NA | NA | NA |
| 0.71  | -0.05 | -0.04 | 0.01  | 1.30E-05 | 0.5      | 0.34     | 0.94     | NA | NA | NA | NA |
| 0.1   | 0.1   | -0.02 | 0     | 1.40E-05 | 3.40E-06 | 0.34     | 0.97     | NA | NA | NA | NA |
| 0.09  | -0.01 | -0.04 | 0.01  | 1.60E-05 | 0.71     | 3.30E-06 | 0.2      | NA | NA | NA | NA |
| -0.23 | -0.06 | -0.02 | -0.04 | 1.70E-05 | 0.57     | 0.53     | 0.1      | NA | NA | NA | NA |

|       |       |       |       |          |          |          |         |    |    |    |    |
|-------|-------|-------|-------|----------|----------|----------|---------|----|----|----|----|
| 0.23  | 0.04  | 0.01  | -0.01 | 1.70E-05 | 0.55     | 0.64     | 0.51    | NA | NA | NA | NA |
| 0.2   | 0.06  | -0.07 | -0.03 | 2.60E-05 | 0.017    | 0.00017  | 0.12    | NA | NA | NA | NA |
| 0.09  | 0.06  | -0.02 | 0.01  | 2.80E-05 | 0.00093  | 0.18     | 0.36    | NA | NA | NA | NA |
| 0.12  | 0.01  | -0.04 | -0.02 | 3.10E-05 | 0.64     | 0.029    | 0.26    | NA | NA | NA | NA |
| 0.27  | 0.06  | -0.01 | 0     | 3.10E-05 | 0.17     | 0.77     | 1       | NA | NA | NA | NA |
| 0.26  | 0.05  | -0.09 | -0.02 | 3.30E-05 | 0.21     | 4.70E-05 | 0.37    | NA | NA | NA | NA |
| 0.21  | 0.1   | -0.01 | 0.03  | 3.70E-05 | 0.00069  | 0.75     | 0.1     | NA | NA | NA | NA |
| 0.32  | -0.09 | -0.09 | 0.02  | 5.20E-05 | 0.073    | 5.80E-06 | 0.44    | NA | NA | NA | NA |
| 0.16  | 0.03  | 0.02  | 0.05  | 5.30E-05 | 0.19     | 0.39     | 0.0072  | NA | NA | NA | NA |
| 0.18  | 0.13  | 0.02  | 0.02  | 6.00E-05 | 1.00E-04 | 0.27     | 0.33    | NA | NA | NA | NA |
| 0.31  | -0.02 | -0.01 | 0.03  | 6.10E-05 | 0.8      | 0.79     | 0.32    | NA | NA | NA | NA |
| 0.12  | 0.06  | -0.07 | -0.04 | 8.80E-05 | 0.0064   | 0.0064   | 0.17    | NA | NA | NA | NA |
| 0.29  | 0.17  | -0.04 | 0     | 9.40E-05 | 0.00011  | 0.036    | 0.97    | NA | NA | NA | NA |
| 0.21  | 0.23  | 0.02  | 0.07  | 9.60E-05 | 5.60E-06 | 0.38     | 0.0018  | NA | NA | NA | NA |
| 0.12  | 0.07  | -0.06 | 0.06  | 0.00013  | 0.0015   | 0.0041   | 0.046   | NA | NA | NA | NA |
| 0.13  | 0.08  | -0.06 | -0.02 | 0.00013  | 0.03     | 0.03     | 0.56    | NA | NA | NA | NA |
| 0.17  | 0.02  | 0     | 0.06  | 0.00014  | 0.62     | 1        | 0.018   | NA | NA | NA | NA |
| 0.87  | 0.09  | -0.03 | 0.04  | 0.00014  | 0.22     | 0.38     | 0.32    | NA | NA | NA | NA |
| 0.35  | 0.1   | 0.01  | -0.02 | 0.00014  | 0.016    | 0.47     | 0.39    | NA | NA | NA | NA |
| 0.14  | 0.09  | 0.11  | 0.04  | 0.00016  | 0.014    | 8.90E-06 | 0.1     | NA | NA | NA | NA |
| 0.88  | 0.5   | 0.12  | 0.32  | 0.00017  | 0.12     | 0.019    | 0.00019 | NA | NA | NA | NA |
| 0.18  | 0.03  | -0.09 | 0.02  | 0.00023  | 0.37     | 1.30E-05 | 0.41    | NA | NA | NA | NA |
| 0.15  | 0.02  | -0.06 | -0.04 | 0.00024  | 0.58     | 0.00068  | 0.035   | NA | NA | NA | NA |
| 0.37  | 0.02  | -0.04 | -0.02 | 0.00025  | 0.65     | 0.014    | 0.26    | NA | NA | NA | NA |
| 0.2   | 0.05  | -0.09 | -0.04 | 0.00026  | 0.62     | 0.0015   | 0.18    | NA | NA | NA | NA |
| 0.35  | 0.16  | 0.1   | 0.38  | 0.00027  | 0.024    | 0.18     | 0.0018  | NA | NA | NA | NA |
| 0.25  | 0.07  | -0.06 | 0.09  | 3.00E-04 | 0.18     | 0.0069   | 0.00018 | NA | NA | NA | NA |
| 0.29  | 0.04  | -0.08 | -0.04 | 0.00037  | 0.65     | 0.021    | 0.31    | NA | NA | NA | NA |
| -0.27 | -0.01 | -0.03 | -0.02 | 0.00038  | 1        | 0.33     | 0.57    | NA | NA | NA | NA |
| 0.29  | 0.02  | -0.11 | -0.03 | 0.00038  | 0.87     | 1.30E-06 | 0.34    | NA | NA | NA | NA |

|       |       |       |       |          |          |          |          |    |    |    |    |
|-------|-------|-------|-------|----------|----------|----------|----------|----|----|----|----|
| 0.17  | 0.08  | -0.05 | -0.06 | 0.00041  | 0.0078   | 0.072    | 0.006    | NA | NA | NA | NA |
| 0.25  | -0.04 | -0.03 | -0.01 | 0.00042  | 0.29     | 0.31     | 0.66     | NA | NA | NA | NA |
| 0.13  | 0.14  | -0.03 | 0     | 0.00042  | 1.50E-08 | 0.12     | 0.93     | NA | NA | NA | NA |
| -0.33 | 0.07  | -0.08 | -0.17 | 0.00044  | 0.41     | 0.12     | 0.0011   | NA | NA | NA | NA |
| 0.08  | 0.03  | -0.07 | -0.01 | 0.00044  | 0.1      | 1.10E-09 | 0.61     | NA | NA | NA | NA |
| 0.19  | -0.02 | -0.09 | -0.04 | 0.00054  | 0.28     | 1.90E-06 | 0.08     | NA | NA | NA | NA |
| 0.22  | -0.05 | -0.03 | -0.03 | 0.00061  | 0.21     | 0.31     | 0.34     | NA | NA | NA | NA |
| 0.09  | 0.05  | 0     | 0.03  | 0.00066  | 0.0076   | 0.74     | 0.0012   | NA | NA | NA | NA |
| 0.06  | 0.09  | -0.05 | 0     | 0.00067  | 7.50E-08 | 4.60E-07 | 0.91     | NA | NA | NA | NA |
| -0.58 | -0.87 | -0.06 | 0.08  | 0.00074  | 3.80E-07 | 0.0077   | 0.025    | NA | NA | NA | NA |
| 0.19  | 0.13  | -0.03 | 0.01  | 0.00077  | 0.036    | 0.16     | 0.72     | NA | NA | NA | NA |
| 0.35  | 0.04  | -0.04 | 0.01  | 0.00081  | 0.31     | 0.092    | 0.79     | NA | NA | NA | NA |
| 0.14  | 0.07  | -0.05 | -0.01 | 0.00089  | 0.021    | 0.0022   | 0.68     | NA | NA | NA | NA |
| 0.08  | 0.03  | 0     | -0.01 | 9.00E-04 | 0.049    | 1        | 0.59     | NA | NA | NA | NA |
| 0.12  | 0.01  | -0.04 | -0.02 | 0.00091  | 0.86     | 0.052    | 0.39     | NA | NA | NA | NA |
| 0.18  | 0.03  | -0.07 | 0.05  | 0.00092  | 0.57     | 0.00013  | 0.048    | NA | NA | NA | NA |
| 0.36  | 0.02  | -0.05 | 0.01  | 0.00093  | 0.84     | 0.048    | 0.73     | NA | NA | NA | NA |
| 0.1   | -0.04 | -0.04 | 0.03  | 0.00099  | 0.043    | 0.0025   | 0.029    | NA | NA | NA | NA |
| 0.23  | -0.04 | -0.07 | 0.01  | 0.001    | 0.3      | 0.00071  | 0.83     | NA | NA | NA | NA |
| 0.1   | 0.04  | 0.04  | 0.01  | 0.0014   | 0.072    | 0.16     | 0.58     | NA | NA | NA | NA |
| 0.29  | 0.04  | -0.04 | -0.01 | 0.0015   | 0.75     | 0.25     | 0.98     | NA | NA | NA | NA |
| -0.09 | 0     | -0.06 | -0.01 | 0.0015   | 1        | 3.70E-05 | 0.78     | NA | NA | NA | NA |
| 0.1   | 0     | -0.01 | 0.04  | 0.0017   | 1        | 0.54     | 0.039    | NA | NA | NA | NA |
| -0.26 | -0.29 | -0.02 | -0.11 | 0.0018   | 0.00017  | 0.87     | 0.079    | NA | NA | NA | NA |
| 0.88  | 0.75  | 0.11  | 0.35  | 0.0018   | 0.00043  | 0.41     | 3.90E-07 | NA | NA | NA | NA |
| 0.29  | 0.02  | -0.1  | -0.07 | 0.0019   | 0.83     | 1.10E-05 | 0.009    | NA | NA | NA | NA |
| 0.1   | 0.07  | -0.04 | -0.01 | 0.002    | 0.0018   | 0.0036   | 0.26     | NA | NA | NA | NA |
| 0.07  | 0.04  | -0.05 | 0     | 0.002    | 0.02     | 3.30E-05 | 0.95     | NA | NA | NA | NA |
| 0.06  | 0.06  | -0.01 | 0     | 0.002    | 0.0011   | 0.73     | 0.85     | NA | NA | NA | NA |
| 0.1   | 0.06  | -0.02 | 0.01  | 0.0021   | 0.0022   | 0.18     | 0.31     | NA | NA | NA | NA |

|       |       |       |       |        |          |          |          |    |    |    |    |
|-------|-------|-------|-------|--------|----------|----------|----------|----|----|----|----|
| 0.3   | 0.16  | -0.04 | -0.02 | 0.0021 | 3.40E-05 | 0.13     | 0.35     | NA | NA | NA | NA |
| 0.06  | 0.02  | 0.01  | 0.03  | 0.0021 | 0.14     | 0.42     | 0.011    | NA | NA | NA | NA |
| 0.83  | -0.13 | -0.08 | 0.01  | 0.0023 | 0.058    | 0.0015   | 0.93     | NA | NA | NA | NA |
| 0.07  | 0.02  | -0.03 | -0.03 | 0.0023 | 0.35     | 0.013    | 0.012    | NA | NA | NA | NA |
| -0.06 | -0.01 | -0.04 | -0.01 | 0.0023 | 0.86     | 0.0054   | 0.41     | NA | NA | NA | NA |
| 0.91  | -0.05 | -0.02 | 0.01  | 0.0025 | 0.72     | 0.44     | 0.9      | NA | NA | NA | NA |
| 0.13  | 0.11  | -0.06 | -0.08 | 0.0025 | 0.0021   | 0.005    | 0.0038   | NA | NA | NA | NA |
| 0.07  | -0.02 | -0.06 | -0.01 | 0.0026 | 0.23     | 7.40E-08 | 0.57     | NA | NA | NA | NA |
| 0.09  | 0     | -0.02 | 0.03  | 0.0027 | 0.87     | 0.022    | 0.022    | NA | NA | NA | NA |
| 0.17  | 0.01  | -0.04 | 0     | 0.0029 | 0.93     | 0.17     | 0.97     | NA | NA | NA | NA |
| 0.62  | 0.62  | -0.17 | -0.05 | 0.0029 | 0.83     | 1.80E-07 | 0.41     | NA | NA | NA | NA |
| 0.23  | 0.21  | -0.01 | 0.05  | 0.003  | 3.90E-06 | 0.8      | 0.021    | NA | NA | NA | NA |
| 0.11  | 0     | -0.03 | -0.02 | 0.0031 | 1        | 0.038    | 0.11     | NA | NA | NA | NA |
| -0.1  | 0.42  | -0.12 | -0.09 | 0.0034 | 4.30E-09 | 0.00013  | 0.037    | NA | NA | NA | NA |
| -0.19 | -0.17 | -0.04 | -0.22 | 0.004  | 0.0019   | 0.74     | 0.019    | NA | NA | NA | NA |
| 0.5   | -0.04 | -0.03 | 0     | 0.0042 | 1        | 0.53     | 0.99     | NA | NA | NA | NA |
| 0.32  | 0.29  | 0     | -0.07 | 0.0046 | 0.2      | 1        | 0.37     | NA | NA | NA | NA |
| -0.54 | -0.54 | -0.12 | -0.08 | 0.0048 | 0.00014  | 0.00022  | 0.014    | NA | NA | NA | NA |
| 0.14  | 0.21  | -0.07 | 0.03  | 0.0049 | 6.40E-06 | 0.061    | 0.52     | NA | NA | NA | NA |
| 0.28  | 0     | -0.08 | -0.05 | 0.0053 | 1        | 0.00091  | 0.019    | NA | NA | NA | NA |
| 0.06  | 0.01  | -0.06 | -0.01 | 0.0053 | 0.76     | 3.60E-05 | 0.59     | NA | NA | NA | NA |
| 0.17  | 0.05  | -0.02 | 0.1   | 0.0061 | 0.098    | 0.27     | 1.00E-04 | NA | NA | NA | NA |
| 0.09  | 0.01  | -0.01 | 0.01  | 0.0062 | 0.75     | 0.57     | 0.25     | NA | NA | NA | NA |
| 0.15  | 0     | 0.02  | 0.06  | 0.0063 | 1        | 0.35     | 0.003    | NA | NA | NA | NA |
| -0.15 | -0.01 | 0     | 0.09  | 0.0065 | 0.98     | 0.9      | 5.00E-05 | NA | NA | NA | NA |
| 0.15  | 0.01  | -0.01 | 0.07  | 0.0068 | 0.86     | 0.75     | 0.0011   | NA | NA | NA | NA |
| -0.32 | 0.49  | -0.03 | 0.05  | 0.0068 | 0.0053   | 0.52     | 0.38     | NA | NA | NA | NA |
| 0.13  | 0.04  | -0.05 | -0.02 | 0.0069 | 0.31     | 0.038    | 0.51     | NA | NA | NA | NA |
| 0.13  | 0.13  | -0.09 | -0.05 | 0.007  | 0.00013  | 4.50E-09 | 0.01     | NA | NA | NA | NA |
| 0.15  | -0.01 | -0.01 | 0     | 0.0071 | 1        | 0.72     | 0.98     | NA | NA | NA | NA |

|       |       |       |       |        |          |          |          |    |    |    |    |
|-------|-------|-------|-------|--------|----------|----------|----------|----|----|----|----|
| 0.09  | 0.02  | -0.04 | -0.02 | 0.0073 | 0.52     | 0.0089   | 0.38     | NA | NA | NA | NA |
| 0.15  | 0.11  | -0.02 | 0.04  | 0.0075 | 0.026    | 0.53     | 0.24     | NA | NA | NA | NA |
| 0.08  | -0.01 | -0.06 | -0.02 | 0.0077 | 0.73     | 0.00026  | 0.42     | NA | NA | NA | NA |
| 0.09  | 0.06  | -0.02 | 0.08  | 0.008  | 0.011    | 0.52     | 3.00E-04 | NA | NA | NA | NA |
| 0.09  | 0.03  | -0.01 | 0.01  | 0.0088 | 0.19     | 0.46     | 0.62     | NA | NA | NA | NA |
| 0.45  | -0.16 | -0.04 | 0.14  | 0.0094 | 0.0025   | 0.27     | 0.0034   | NA | NA | NA | NA |
| -0.15 | -0.12 | -0.05 | -0.07 | 0.0096 | 0.024    | 0.062    | 0.013    | NA | NA | NA | NA |
| 0.31  | 0.14  | 0     | 0.04  | 0.0097 | 0.15     | 1        | 0.14     | NA | NA | NA | NA |
| 0.08  | -0.02 | -0.04 | 0.01  | 0.0099 | 0.38     | 0.00078  | 0.75     | NA | NA | NA | NA |
| 0.19  | -0.07 | -0.01 | 0.04  | 0.01   | 0.14     | 0.78     | 0.11     | NA | NA | NA | NA |
| 0.1   | -0.03 | -0.02 | -0.01 | 0.01   | 0.29     | 0.22     | 0.54     | NA | NA | NA | NA |
| 0.05  | 0.05  | -0.01 | 0.01  | 0.011  | 7.00E-07 | 0.6      | 0.71     | NA | NA | NA | NA |
| 0.13  | -0.03 | -0.02 | 0.06  | 0.011  | 0.37     | 0.54     | 0.1      | NA | NA | NA | NA |
| 0.49  | 0     | 0.03  | 0.05  | 0.011  | 1        | 0.17     | 0.0017   | NA | NA | NA | NA |
| 0.07  | 0     | -0.04 | -0.04 | 0.011  | 1        | 0.049    | 0.031    | NA | NA | NA | NA |
| 0.08  | 0.03  | -0.05 | -0.02 | 0.011  | 0.23     | 0.0019   | 0.3      | NA | NA | NA | NA |
| -0.12 | 0.04  | -0.08 | 0.07  | 0.011  | 0.4      | 0.1      | 0.1      | NA | NA | NA | NA |
| 0.88  | 0.03  | 0.11  | 0.12  | 0.011  | 1        | 0.025    | 0.022    | NA | NA | NA | NA |
| 0.39  | 0.12  | -0.07 | -0.05 | 0.012  | 0.18     | 0.073    | 0.52     | NA | NA | NA | NA |
| 0.16  | -0.06 | -0.09 | 0.06  | 0.012  | 0.14     | 0.00035  | 0.038    | NA | NA | NA | NA |
| 0.13  | 0.05  | -0.14 | 0.08  | 0.012  | 0.28     | 3.50E-09 | 0.19     | NA | NA | NA | NA |
| 0.09  | 0.08  | -0.03 | 0     | 0.013  | 0.0035   | 0.018    | 1        | NA | NA | NA | NA |
| 0.08  | 0.19  | -0.03 | 0.04  | 0.013  | 5.00E-08 | 0.18     | 0.13     | NA | NA | NA | NA |
| 0.19  | -0.1  | -0.02 | 0.02  | 0.013  | 0.00076  | 0.29     | 0.43     | NA | NA | NA | NA |
| 0.1   | 0.16  | -0.01 | 0.05  | 0.014  | 0.0063   | 0.78     | 0.026    | NA | NA | NA | NA |
| 0.09  | 0.14  | -0.06 | 0.02  | 0.014  | 1.40E-07 | 0.00011  | 0.33     | NA | NA | NA | NA |
| 0.07  | 0.03  | 0     | 0.03  | 0.014  | 0.13     | 0.84     | 0.036    | NA | NA | NA | NA |
| 0.17  | -0.1  | -0.22 | -0.2  | 0.014  | 0.05     | 3.30E-07 | 4.00E-05 | NA | NA | NA | NA |
| 0.07  | 0.09  | 0.01  | 0.01  | 0.015  | 0.019    | 0.81     | 0.51     | NA | NA | NA | NA |
| 0.14  | 0.14  | 0     | 0.04  | 0.015  | 0.0013   | 1        | 0.11     | NA | NA | NA | NA |

|       |       |       |       |       |          |          |          |    |    |    |    |
|-------|-------|-------|-------|-------|----------|----------|----------|----|----|----|----|
| 0.23  | -0.21 | 0.04  | 0.09  | 0.015 | 6.30E-08 | 0.052    | 6.70E-05 | NA | NA | NA | NA |
| -0.09 | 0.03  | -0.02 | 0.09  | 0.016 | 0.59     | 0.39     | 0.00076  | NA | NA | NA | NA |
| 0.06  | 0.07  | -0.04 | 0.02  | 0.016 | 0.0014   | 0.00096  | 0.14     | NA | NA | NA | NA |
| 0.12  | 0     | -0.05 | 0.03  | 0.016 | 0.98     | 0.00039  | 0.027    | NA | NA | NA | NA |
| 0.11  | 0.02  | 0     | 0.03  | 0.017 | 0.49     | 1        | 0.068    | NA | NA | NA | NA |
| -0.09 | -0.06 | -0.02 | 0.03  | 0.017 | 0.064    | 0.58     | 0.5      | NA | NA | NA | NA |
| 0.07  | 0.05  | -0.05 | 0     | 0.017 | 0.012    | 3.50E-05 | 0.88     | NA | NA | NA | NA |
| 0.16  | 0.05  | -0.02 | 0.06  | 0.017 | 0.27     | 0.33     | 0.0024   | NA | NA | NA | NA |
| 0.61  | 0.18  | 0.01  | -0.03 | 0.017 | 0.041    | 0.89     | 0.27     | NA | NA | NA | NA |
| 0.09  | 0.07  | -0.06 | -0.03 | 0.017 | 0.035    | 0.00048  | 0.25     | NA | NA | NA | NA |
| 0.09  | 0     | -0.06 | -0.02 | 0.018 | 1        | 4.00E-07 | 0.11     | NA | NA | NA | NA |
| 0.19  | 0.21  | 0.02  | 0.04  | 0.018 | 1.40E-05 | 0.37     | 0.17     | NA | NA | NA | NA |
| 0.07  | 0.06  | -0.01 | 0.06  | 0.019 | 0.026    | 0.85     | 0.1      | NA | NA | NA | NA |
| 0.12  | 0.02  | -0.02 | 0.05  | 0.019 | 0.47     | 0.32     | 0.021    | NA | NA | NA | NA |
| 0.07  | 0.04  | 0     | 0     | 0.019 | 0.021    | 1        | 0.81     | NA | NA | NA | NA |
| 0.12  | -0.01 | -0.04 | 0     | 0.019 | 0.86     | 0.094    | 0.97     | NA | NA | NA | NA |
| 0.1   | 0.02  | -0.04 | 0.02  | 0.02  | 0.4      | 0.13     | 0.64     | NA | NA | NA | NA |
| 0.04  | 0.03  | -0.02 | 0.01  | 0.021 | 0.065    | 0.073    | 0.69     | NA | NA | NA | NA |
| 0.11  | -0.07 | -0.02 | 0.02  | 0.021 | 0.01     | 0.23     | 0.31     | NA | NA | NA | NA |
| 0.14  | 0.14  | 0.03  | 0.07  | 0.021 | 0.033    | 0.4      | 0.032    | NA | NA | NA | NA |
| 0.1   | 0.09  | -0.03 | 0.05  | 0.022 | 0.0013   | 0.11     | 0.0062   | NA | NA | NA | NA |
| 0.08  | 0.01  | -0.01 | 0.03  | 0.023 | 0.67     | 0.68     | 0.17     | NA | NA | NA | NA |
| 0.11  | -0.01 | -0.03 | 0.03  | 0.023 | 0.99     | 0.03     | 0.086    | NA | NA | NA | NA |
| 0.42  | 0     | 0.02  | 0.09  | 0.024 | 1        | 0.46     | 0.0031   | NA | NA | NA | NA |
| -0.04 | 0.01  | -0.05 | 0.03  | 0.024 | 0.67     | 1.30E-05 | 0.027    | NA | NA | NA | NA |
| 0.16  | -0.01 | -0.18 | -0.15 | 0.024 | 1        | 2.40E-05 | 0.0018   | NA | NA | NA | NA |
| -0.06 | -0.04 | -0.02 | 0.01  | 0.024 | 0.16     | 0.26     | 0.75     | NA | NA | NA | NA |
| 0.12  | -0.02 | -0.03 | 0.05  | 0.025 | 0.63     | 0.031    | 0.0016   | NA | NA | NA | NA |
| 0.26  | 0.05  | -0.16 | -0.03 | 0.028 | 0.41     | 2.10E-08 | 0.35     | NA | NA | NA | NA |
| -0.04 | -0.03 | -0.02 | 0.01  | 0.028 | 0.046    | 0.21     | 0.65     | NA | NA | NA | NA |

|       |       |       |       |       |          |          |        |    |    |    |    |
|-------|-------|-------|-------|-------|----------|----------|--------|----|----|----|----|
| 0.08  | 0.1   | -0.01 | 0     | 0.028 | 0.00012  | 0.58     | 0.99   | NA | NA | NA | NA |
| 0.06  | 0.09  | -0.01 | -0.01 | 0.029 | 2.00E-04 | 0.6      | 0.32   | NA | NA | NA | NA |
| -0.07 | -0.06 | -0.04 | 0.02  | 0.029 | 0.023    | 0.0018   | 0.34   | NA | NA | NA | NA |
| -0.19 | -0.1  | -0.01 | 0.06  | 0.029 | 0.6      | 0.79     | 0.026  | NA | NA | NA | NA |
| 0.14  | 0.04  | -0.06 | 0.03  | 0.029 | 0.52     | 0.046    | 0.56   | NA | NA | NA | NA |
| 0.07  | -0.01 | -0.02 | 0.06  | 0.031 | 0.78     | 0.34     | 0.0014 | NA | NA | NA | NA |
| 0.04  | 0.08  | 0.01  | 0     | 0.031 | 3.10E-05 | 0.63     | 0.75   | NA | NA | NA | NA |
| 0.17  | 0.09  | -0.02 | 0.13  | 0.032 | 0.23     | 0.61     | 0.015  | NA | NA | NA | NA |
| 0.11  | 0.05  | -0.08 | -0.05 | 0.032 | 0.16     | 0.00087  | 0.036  | NA | NA | NA | NA |
| 0.05  | 0.02  | -0.04 | 0.02  | 0.034 | 0.27     | 0.0066   | 0.15   | NA | NA | NA | NA |
| -0.14 | -0.12 | 0.05  | 0     | 0.035 | 0.61     | 0.32     | 1      | NA | NA | NA | NA |
| 0.08  | 0.02  | -0.02 | -0.01 | 0.036 | 0.41     | 0.35     | 0.42   | NA | NA | NA | NA |
| 0.13  | 0.2   | 0.02  | 0.1   | 0.037 | 0.00017  | 0.42     | 0.0022 | NA | NA | NA | NA |
| 0.09  | -0.02 | -0.03 | 0.04  | 0.041 | 0.4      | 0.017    | 0.0051 | NA | NA | NA | NA |
| 0.03  | 0.09  | -0.04 | 0.01  | 0.041 | 5.40E-07 | 0.021    | 0.66   | NA | NA | NA | NA |
| 0.36  | 0.26  | 0.06  | -0.04 | 0.042 | 0.061    | 0.33     | 0.11   | NA | NA | NA | NA |
| 0.33  | 0.09  | -0.02 | 0.32  | 0.043 | 0.81     | 1        | 0.015  | NA | NA | NA | NA |
| 0.09  | -0.02 | -0.05 | -0.02 | 0.043 | 0.39     | 0.016    | 0.34   | NA | NA | NA | NA |
| 0.13  | 0.04  | -0.04 | -0.02 | 0.044 | 0.51     | 0.24     | 0.57   | NA | NA | NA | NA |
| 0.08  | -0.08 | -0.05 | 0.03  | 0.045 | 0.0022   | 6.50E-05 | 0.056  | NA | NA | NA | NA |
| 0.06  | 0     | -0.02 | -0.01 | 0.045 | 0.96     | 0.039    | 0.4    | NA | NA | NA | NA |
| 0.06  | 0.04  | -0.05 | 0.02  | 0.046 | 0.066    | 0.00025  | 0.32   | NA | NA | NA | NA |
| 0.08  | 0.06  | -0.04 | -0.01 | 0.046 | 0.13     | 0.0092   | 0.67   | NA | NA | NA | NA |
| -0.31 | -0.17 | -0.07 | -0.03 | 0.046 | 0.72     | 0.11     | 0.45   | NA | NA | NA | NA |
| 0.08  | 0.05  | -0.01 | 0     | 0.047 | 0.035    | 0.32     | 0.83   | NA | NA | NA | NA |
| 0.1   | 0.07  | -0.03 | 0.03  | 0.048 | 0.1      | 0.12     | 0.087  | NA | NA | NA | NA |
| 0.07  | 0.07  | -0.06 | 0.03  | 0.049 | 0.0052   | 1.90E-05 | 0.061  | NA | NA | NA | NA |
| 0.06  | 0.06  | -0.06 | -0.01 | 0.05  | 0.015    | 5.50E-08 | 0.34   | NA | NA | NA | NA |
| -0.1  | 0.06  | -0.18 | -0.13 | 0.051 | 0.31     | 1.60E-05 | 0.0011 | NA | NA | NA | NA |
| 0.06  | -0.01 | 0.01  | 0.02  | 0.051 | 0.71     | 0.63     | 0.041  | NA | NA | NA | NA |



|       |       |       |       |       |          |          |          |    |    |    |    |
|-------|-------|-------|-------|-------|----------|----------|----------|----|----|----|----|
| 0.07  | 0.02  | -0.01 | 0.06  | 0.053 | 0.44     | 0.51     | 4.00E-04 | NA | NA | NA | NA |
| 0.09  | -0.1  | -0.05 | -0.05 | 0.054 | 0.00088  | 0.0016   | 0.0085   | NA | NA | NA | NA |
| 0.43  | 0.5   | -0.09 | -0.02 | 0.055 | 0.046    | 0.00069  | 0.53     | NA | NA | NA | NA |
| -0.08 | 0.02  | -0.01 | -0.03 | 0.056 | 0.81     | 0.82     | 0.11     | NA | NA | NA | NA |
| 0.4   | 0.5   | 0.15  | 0.6   | 0.056 | 0.00045  | 0.046    | 2.30E-06 | NA | NA | NA | NA |
| 0.04  | 0.02  | -0.04 | 0.05  | 0.056 | 0.3      | 0.00053  | 3.60E-05 | NA | NA | NA | NA |
| 0.23  | 0.1   | -0.01 | 0.04  | 0.057 | 0.22     | 0.81     | 0.29     | NA | NA | NA | NA |
| 0.45  | 0.26  | -0.06 | 0.04  | 0.06  | 0.43     | 0.013    | 0.32     | NA | NA | NA | NA |
| -0.12 | -0.1  | -0.04 | -0.04 | 0.06  | 0.3      | 0.032    | 0.04     | NA | NA | NA | NA |
| 0.06  | 0.08  | -0.08 | -0.04 | 0.061 | 0.011    | 5.20E-08 | 0.022    | NA | NA | NA | NA |
| 0.13  | 0.22  | -0.06 | -0.02 | 0.062 | 6.00E-05 | 0.0035   | 0.4      | NA | NA | NA | NA |
| 0.04  | 0     | -0.1  | -0.08 | 0.063 | 1        | 8.40E-07 | 5.40E-05 | NA | NA | NA | NA |
| 0.18  | 0.13  | 0.02  | 0.03  | 0.063 | 0.015    | 0.66     | 0.34     | NA | NA | NA | NA |
| 0.08  | -0.01 | -0.06 | 0.02  | 0.064 | 0.68     | 3.20E-05 | 0.36     | NA | NA | NA | NA |
| -0.12 | -0.13 | -0.01 | -0.05 | 0.064 | 0.11     | 0.94     | 0.24     | NA | NA | NA | NA |
| 0.06  | 0.02  | -0.06 | -0.02 | 0.064 | 0.27     | 3.70E-07 | 0.084    | NA | NA | NA | NA |
| 0.1   | 0.01  | -0.09 | -0.03 | 0.064 | 0.99     | 0.0022   | 0.36     | NA | NA | NA | NA |
| 0.04  | 0.01  | -0.04 | 0.04  | 0.065 | 0.74     | 0.041    | 0.26     | NA | NA | NA | NA |
| 0.04  | 0     | -0.02 | -0.03 | 0.065 | 0.94     | 0.29     | 0.015    | NA | NA | NA | NA |
| 0.07  | 0.07  | 0     | -0.01 | 0.065 | 0.038    | 1        | 0.73     | NA | NA | NA | NA |
| 0.17  | 0.1   | -0.09 | 0     | 0.066 | 0.18     | 3.60E-05 | 1        | NA | NA | NA | NA |
| -0.09 | -0.05 | -0.09 | 0.08  | 0.067 | 0.4      | 0.0024   | 0.018    | NA | NA | NA | NA |
| -0.37 | NA    | -0.22 | -0.13 | 0.067 | NA       | 0.052    | 0.26     | NA | NA | NA | NA |
| 0.06  | -0.02 | -0.03 | -0.03 | 0.068 | 0.28     | 0.18     | 0.14     | NA | NA | NA | NA |
| 0.12  | -0.03 | -0.02 | 0     | 0.07  | 0.19     | 0.26     | 1        | NA | NA | NA | NA |
| 0.2   | 0.26  | -0.08 | -0.01 | 0.074 | 0.012    | 0.16     | 0.91     | NA | NA | NA | NA |
| 0.04  | 0.05  | -0.03 | -0.03 | 0.075 | 0.0023   | 0.0071   | 0.017    | NA | NA | NA | NA |
| 0.11  | 0.18  | 0.02  | 0.12  | 0.077 | 1.40E-05 | 0.52     | 0.00033  | NA | NA | NA | NA |
| 0.04  | 0.09  | -0.05 | 0.06  | 0.079 | 0.00011  | 0.02     | 0.0047   | NA | NA | NA | NA |
| 0.04  | 0.09  | -0.01 | 0.01  | 0.085 | 1.10E-07 | 0.64     | 0.42     | NA | NA | NA | NA |

|       |       |       |       |       |          |          |          |    |    |    |    |
|-------|-------|-------|-------|-------|----------|----------|----------|----|----|----|----|
| -0.25 | -0.21 | 0.02  | 0.09  | 0.087 | 0.018    | 0.83     | 0.19     | NA | NA | NA | NA |
| 0.08  | -0.06 | -0.01 | 0.06  | 0.088 | 0.25     | 0.73     | 0.00067  | NA | NA | NA | NA |
| 0.1   | -0.02 | -0.03 | -0.03 | 0.088 | 1        | 0.36     | 0.39     | NA | NA | NA | NA |
| 0.05  | 0.05  | -0.02 | 0.04  | 0.089 | 0.03     | 0.24     | 0.054    | NA | NA | NA | NA |
| 0.16  | -0.05 | -0.01 | 0.01  | 0.089 | 0.63     | 0.89     | 0.9      | NA | NA | NA | NA |
| -0.09 | -0.09 | -0.06 | 0     | 0.093 | 0.17     | 0.019    | 1        | NA | NA | NA | NA |
| 0.31  | 0.23  | -0.08 | -0.03 | 0.095 | 0.014    | 0.011    | 0.36     | NA | NA | NA | NA |
| -0.13 | -0.13 | -0.08 | -0.08 | 0.098 | 0.11     | 0.014    | 0.07     | NA | NA | NA | NA |
| 0.08  | 0.04  | -0.07 | 0     | 0.1   | 0.31     | 2.40E-05 | 0.98     | NA | NA | NA | NA |
| 0.11  | 0.01  | -0.07 | 0.03  | 0.1   | 0.84     | 0.0018   | 0.29     | NA | NA | NA | NA |
| 0.05  | 0.19  | -0.06 | 0.01  | 0.1   | 5.00E-07 | 0.00066  | 0.63     | NA | NA | NA | NA |
| 0.15  | 0.02  | 0.02  | 0     | 0.1   | 0.78     | 0.45     | 1        | NA | NA | NA | NA |
| 0.05  | 0.07  | -0.06 | -0.01 | 0.11  | 0.012    | 0.00098  | 0.72     | NA | NA | NA | NA |
| 0.57  | 0.25  | 0.04  | 0.06  | 0.11  | 0.8      | 0.51     | 0.46     | NA | NA | NA | NA |
| 0.52  | 0.14  | 0.01  | 0.11  | 0.11  | 0.11     | 0.86     | 3.20E-06 | NA | NA | NA | NA |
| 0.11  | 0.02  | -0.06 | -0.03 | 0.11  | 1        | 0.031    | 0.45     | NA | NA | NA | NA |
| 0.24  | -0.02 | -0.05 | 0.06  | 0.11  | 1        | 0.02     | 0.043    | NA | NA | NA | NA |
| 0.05  | -0.05 | -0.04 | -0.01 | 0.11  | 0.0048   | 0.025    | 0.77     | NA | NA | NA | NA |
| 0.02  | 0.08  | -0.03 | 0     | 0.12  | 3.60E-08 | 0.0032   | 0.67     | NA | NA | NA | NA |
| 0.17  | 0.14  | -0.17 | -0.11 | 0.12  | 0.0065   | 0.0037   | 0.0036   | NA | NA | NA | NA |
| 0.09  | 0.03  | -0.1  | -0.03 | 0.12  | 0.63     | 5.70E-05 | 0.36     | NA | NA | NA | NA |
| 0.08  | 0.04  | -0.05 | 0.01  | 0.12  | 0.14     | 0.0015   | 0.69     | NA | NA | NA | NA |
| -0.03 | 0     | -0.03 | 0     | 0.12  | 0.93     | 0.005    | 0.93     | NA | NA | NA | NA |
| -0.06 | 0.13  | -0.03 | 0.01  | 0.13  | 0.015    | 0.34     | 0.88     | NA | NA | NA | NA |
| -0.05 | -0.01 | -0.07 | -0.01 | 0.13  | 0.74     | 5.10E-06 | 0.42     | NA | NA | NA | NA |
| 0.04  | 0.07  | -0.01 | 0.05  | 0.14  | 0.0035   | 0.68     | 0.0014   | NA | NA | NA | NA |
| 0.03  | 0.08  | -0.01 | 0.02  | 0.14  | 0.00092  | 0.6      | 0.44     | NA | NA | NA | NA |
| 0.04  | 0.05  | -0.01 | 0     | 0.14  | 0.092    | 0.74     | 1        | NA | NA | NA | NA |
| 0.03  | 0.04  | -0.07 | 0.03  | 0.14  | 0.017    | 1.00E-07 | 0.031    | NA | NA | NA | NA |
| 0.27  | 0.13  | 0.09  | 0.08  | 0.14  | 0.56     | 0.22     | 0.3      | NA | NA | NA | NA |

|       |       |       |       |      |          |          |          |    |    |    |    |
|-------|-------|-------|-------|------|----------|----------|----------|----|----|----|----|
| 0.03  | 0.06  | -0.03 | 0.06  | 0.15 | 0.0024   | 0.03     | 2.20E-05 | NA | NA | NA | NA |
| 0.15  | 0.34  | 0.04  | 0.14  | 0.16 | 0.00074  | 0.29     | 0.00013  | NA | NA | NA | NA |
| 0.1   | 0.01  | -0.03 | 0.03  | 0.16 | 0.95     | 0.06     | 0.14     | NA | NA | NA | NA |
| 0.08  | 0.11  | -0.06 | -0.02 | 0.16 | 0.0016   | 0.0021   | 0.42     | NA | NA | NA | NA |
| 0.03  | -0.03 | -0.06 | -0.01 | 0.16 | 0.12     | 2.00E-04 | 0.44     | NA | NA | NA | NA |
| -0.09 | 0.05  | -0.14 | -0.03 | 0.16 | 0.56     | 0.0061   | 0.6      | NA | NA | NA | NA |
| -0.12 | -0.01 | -0.07 | -0.03 | 0.16 | 0.91     | 6.70E-05 | 0.18     | NA | NA | NA | NA |
| 0.04  | 0.02  | 0.01  | 0.01  | 0.17 | 0.3      | 0.59     | 0.82     | NA | NA | NA | NA |
| 0.04  | 0.01  | -0.06 | 0.01  | 0.17 | 0.85     | 0.00077  | 0.7      | NA | NA | NA | NA |
| 0.1   | 0.06  | 0.01  | 0.06  | 0.17 | 0.014    | 0.55     | 0.00076  | NA | NA | NA | NA |
| 0.11  | 0.01  | -0.09 | 0.04  | 0.17 | 1        | 0.0074   | 0.39     | NA | NA | NA | NA |
| 0.05  | -0.03 | 0.01  | 0.04  | 0.17 | 0.071    | 0.36     | 0.011    | NA | NA | NA | NA |
| 0.03  | 0     | -0.01 | 0     | 0.17 | 0.97     | 0.41     | 0.99     | NA | NA | NA | NA |
| 0.05  | 0.18  | -0.02 | 0     | 0.18 | 1.60E-06 | 0.44     | 1        | NA | NA | NA | NA |
| 0.9   | 0.18  | -0.03 | 0.06  | 0.19 | 0.0033   | 0.12     | 0.0077   | NA | NA | NA | NA |
| -0.11 | -0.08 | -0.03 | 0     | 0.19 | 0.023    | 0.2      | 0.86     | NA | NA | NA | NA |
| 0.04  | -0.04 | 0     | 0     | 0.19 | 0.038    | 0.91     | 0.94     | NA | NA | NA | NA |
| 0.26  | 0.03  | -0.03 | -0.04 | 0.19 | 0.77     | 0.35     | 0.12     | NA | NA | NA | NA |
| 0.05  | -0.01 | -0.09 | -0.05 | 0.19 | 0.76     | 5.00E-08 | 0.0097   | NA | NA | NA | NA |
| 0.13  | -0.08 | -0.02 | 0.03  | 0.19 | 0.16     | 0.43     | 0.43     | NA | NA | NA | NA |
| 0.06  | -0.07 | -0.01 | 0.03  | 0.19 | 0.026    | 0.62     | 0.11     | NA | NA | NA | NA |
| 0.92  | 0.29  | -0.07 | -0.08 | 0.2  | 0.11     | 0.84     | 0.53     | NA | NA | NA | NA |
| 0.49  | 0.07  | 0.06  | 0.13  | 0.2  | 0.54     | 0.083    | 0.0017   | NA | NA | NA | NA |
| -0.16 | -0.24 | -0.11 | 0     | 0.2  | 0.0061   | 0.00053  | 1        | NA | NA | NA | NA |
| 0.07  | -0.01 | -0.07 | -0.08 | 0.2  | 0.85     | 5.30E-05 | 2.50E-05 | NA | NA | NA | NA |
| 0.08  | 0.04  | -0.18 | -0.13 | 0.2  | 0.83     | 0.0023   | 0.035    | NA | NA | NA | NA |
| 0.06  | -0.04 | 0.03  | 0.01  | 0.2  | 0.49     | 0.24     | 0.88     | NA | NA | NA | NA |
| 0.1   | -0.01 | -0.04 | 0     | 0.2  | 0.93     | 0.017    | 1        | NA | NA | NA | NA |
| 0.06  | 0.06  | -0.06 | -0.01 | 0.2  | 0.24     | 0.0031   | 0.76     | NA | NA | NA | NA |
| 0.03  | 0.05  | -0.01 | 0.01  | 0.21 | 0.00068  | 0.73     | 0.29     | NA | NA | NA | NA |

|       |       |       |       |      |          |          |          |    |    |    |    |
|-------|-------|-------|-------|------|----------|----------|----------|----|----|----|----|
| 0.07  | -0.02 | -0.06 | 0     | 0.21 | 0.32     | 8.50E-07 | 0.98     | NA | NA | NA | NA |
| -0.24 | -0.09 | -0.04 | 0.04  | 0.21 | 0.33     | 0.095    | 0.33     | NA | NA | NA | NA |
| 0.12  | 0.05  | 0     | 0.07  | 0.22 | 0.37     | 0.93     | 0.0012   | NA | NA | NA | NA |
| 0.17  | -0.03 | -0.11 | -0.07 | 0.22 | 0.85     | 0.00094  | 0.14     | NA | NA | NA | NA |
| 0.15  | 0.28  | -0.08 | -0.02 | 0.22 | 0.00011  | 7.00E-04 | 0.42     | NA | NA | NA | NA |
| 0.05  | -0.02 | -0.06 | -0.04 | 0.22 | 0.47     | 0.00013  | 0.02     | NA | NA | NA | NA |
| 0.09  | 0.02  | -0.04 | 0.01  | 0.22 | 0.23     | 0.011    | 0.74     | NA | NA | NA | NA |
| 0.07  | 0.09  | -0.05 | 0.01  | 0.22 | 0.0074   | 0.0051   | 0.65     | NA | NA | NA | NA |
| 0.07  | 0.26  | 0.04  | 0.06  | 0.22 | 0.047    | 0.44     | 0.19     | NA | NA | NA | NA |
| -0.08 | -0.06 | -0.02 | 0.08  | 0.22 | 0.43     | 0.24     | 0.00099  | NA | NA | NA | NA |
| 0.07  | -0.01 | -0.04 | -0.04 | 0.22 | 0.69     | 0.03     | 0.039    | NA | NA | NA | NA |
| 0.06  | 0.02  | -0.04 | -0.02 | 0.22 | 0.77     | 0.096    | 0.57     | NA | NA | NA | NA |
| 0.04  | -0.01 | -0.04 | 0     | 0.22 | 0.66     | 0.0013   | 0.95     | NA | NA | NA | NA |
| 0.05  | 0.2   | -0.04 | 0.05  | 0.23 | 2.80E-05 | 0.16     | 0.15     | NA | NA | NA | NA |
| -0.03 | 0     | -0.06 | 0.01  | 0.23 | 0.97     | 6.50E-05 | 0.75     | NA | NA | NA | NA |
| 0.05  | -0.01 | -0.09 | -0.01 | 0.23 | 0.98     | 9.40E-09 | 0.69     | NA | NA | NA | NA |
| 0.03  | 0.16  | -0.01 | 0.04  | 0.23 | 7.70E-09 | 0.4      | 0.003    | NA | NA | NA | NA |
| 0.08  | 0.01  | -0.1  | 0.01  | 0.23 | 0.84     | 5.90E-08 | 0.59     | NA | NA | NA | NA |
| 0.04  | 0.04  | -0.06 | -0.03 | 0.23 | 0.08     | 1.90E-08 | 0.0075   | NA | NA | NA | NA |
| 0.04  | 0.12  | -0.06 | -0.01 | 0.23 | 2.10E-05 | 0.0054   | 0.84     | NA | NA | NA | NA |
| -0.16 | 0.13  | -0.01 | 0.32  | 0.24 | 0.12     | 0.9      | 7.80E-05 | NA | NA | NA | NA |
| 0.03  | 0.01  | -0.05 | 0.03  | 0.24 | 0.58     | 0.0015   | 0.082    | NA | NA | NA | NA |
| 0.03  | -0.03 | -0.06 | -0.02 | 0.24 | 0.14     | 3.10E-08 | 0.093    | NA | NA | NA | NA |
| -0.1  | -0.02 | 0     | 0.01  | 0.24 | 0.94     | 1        | 0.75     | NA | NA | NA | NA |
| 0.08  | 0     | -0.05 | 0.05  | 0.24 | 1        | 0.041    | 0.075    | NA | NA | NA | NA |
| 0.08  | 0.07  | -0.07 | 0.03  | 0.25 | 0.018    | 0.016    | 0.38     | NA | NA | NA | NA |
| -0.06 | 0.03  | 0     | 0.11  | 0.25 | 0.61     | 0.98     | 0.00078  | NA | NA | NA | NA |
| 0.03  | 0.02  | -0.01 | 0.04  | 0.26 | 0.22     | 0.65     | 0.03     | NA | NA | NA | NA |
| 0.07  | -0.04 | -0.11 | -0.06 | 0.26 | 0.076    | 1.60E-06 | 0.011    | NA | NA | NA | NA |
| -0.05 | 0.04  | -0.05 | -0.02 | 0.26 | 0.4      | 0.0064   | 0.44     | NA | NA | NA | NA |

|       |       |       |       |      |          |          |          |    |    |    |    |
|-------|-------|-------|-------|------|----------|----------|----------|----|----|----|----|
| -0.08 | -0.01 | -0.04 | 0.03  | 0.27 | 1        | 0.2      | 0.51     | NA | NA | NA | NA |
| 0.05  | 0.03  | -0.07 | -0.04 | 0.27 | 0.44     | 0.00013  | 0.086    | NA | NA | NA | NA |
| -0.07 | -0.1  | -0.02 | 0.04  | 0.27 | 0.14     | 0.38     | 0.15     | NA | NA | NA | NA |
| 0.14  | 0.03  | -0.05 | -0.1  | 0.28 | 0.42     | 0.092    | 0.0023   | NA | NA | NA | NA |
| -0.14 | 0.04  | -0.05 | -0.06 | 0.28 | 1        | 0.23     | 0.13     | NA | NA | NA | NA |
| 0.14  | 0.08  | -0.05 | 0.08  | 0.28 | 0.57     | 0.14     | 0.032    | NA | NA | NA | NA |
| 0.08  | 0.26  | -0.14 | 0.01  | 0.29 | 0.00036  | 0.00015  | 0.84     | NA | NA | NA | NA |
| -0.17 | 0.11  | -0.08 | -0.02 | 0.29 | 0.48     | 0.00072  | 0.65     | NA | NA | NA | NA |
| 0.04  | 0.11  | -0.03 | 0.01  | 0.29 | 5.80E-05 | 0.12     | 0.64     | NA | NA | NA | NA |
| 0.67  | NA    | 0     | 0.06  | 0.29 | NA       | 1        | 0.27     | NA | NA | NA | NA |
| 0.02  | 0.1   | -0.02 | 0.07  | 0.3  | 1.00E-04 | 0.21     | 0.00017  | NA | NA | NA | NA |
| 0.09  | 0.04  | 0.03  | 0.07  | 0.3  | 0.7      | 0.36     | 0.013    | NA | NA | NA | NA |
| 0.09  | -0.12 | 0     | 0.03  | 0.3  | 0.079    | 0.92     | 0.28     | NA | NA | NA | NA |
| 0.02  | 0     | -0.01 | -0.01 | 0.3  | 1        | 0.36     | 0.41     | NA | NA | NA | NA |
| -0.09 | 0.13  | -0.05 | -0.03 | 0.3  | 0.0016   | 0.0066   | 0.21     | NA | NA | NA | NA |
| -0.03 | 0.03  | -0.05 | -0.01 | 0.3  | 0.35     | 0.00026  | 0.74     | NA | NA | NA | NA |
| 0.16  | -0.09 | -0.02 | -0.02 | 0.3  | 0.24     | 0.41     | 0.45     | NA | NA | NA | NA |
| 0.07  | 0.02  | -0.02 | -0.04 | 0.3  | 0.84     | 0.4      | 0.13     | NA | NA | NA | NA |
| -0.3  | -0.7  | -0.2  | -0.2  | 0.31 | 0.011    | 0.061    | 0.021    | NA | NA | NA | NA |
| 0.05  | 0.01  | -0.04 | 0.03  | 0.31 | 0.6      | 0.11     | 0.27     | NA | NA | NA | NA |
| 0.35  | 0.13  | -0.18 | 0     | 0.31 | 0.77     | 6.10E-05 | 1        | NA | NA | NA | NA |
| 0.06  | -0.03 | -0.02 | 0.04  | 0.31 | 0.63     | 0.48     | 0.066    | NA | NA | NA | NA |
| -0.04 | -0.05 | 0.02  | 0.07  | 0.32 | 0.01     | 0.46     | 0.004    | NA | NA | NA | NA |
| 0.5   | NA    | NA    | NA    | 0.32 | NA       | NA       | NA       | NA | NA | NA | NA |
| 0.21  | 0.13  | -0.01 | 0.19  | 0.32 | 0.097    | 0.85     | 3.20E-06 | NA | NA | NA | NA |
| -0.05 | 0     | -0.01 | 0.02  | 0.32 | 0.96     | 0.77     | 0.46     | NA | NA | NA | NA |
| 0.05  | 0.04  | -0.05 | -0.03 | 0.32 | 0.59     | 0.0071   | 0.11     | NA | NA | NA | NA |
| -0.14 | -0.1  | -0.09 | -0.03 | 0.32 | 0.64     | 0.22     | 0.93     | NA | NA | NA | NA |
| 0.02  | 0.03  | -0.07 | -0.04 | 0.32 | 0.34     | 1.60E-07 | 0.0044   | NA | NA | NA | NA |
| -0.05 | -0.01 | -0.04 | 0.01  | 0.32 | 0.94     | 0.19     | 0.81     | NA | NA | NA | NA |

|       |       |       |       |      |         |          |          |    |    |    |    |
|-------|-------|-------|-------|------|---------|----------|----------|----|----|----|----|
| -0.05 | 0.05  | -0.02 | 0.03  | 0.33 | 0.3     | 0.27     | 0.2      | NA | NA | NA | NA |
| 0.05  | 0.05  | 0     | 0.03  | 0.33 | 0.3     | 0.93     | 0.25     | NA | NA | NA | NA |
| 0.03  | 0.03  | -0.06 | -0.01 | 0.33 | 0.11    | 0.0049   | 0.72     | NA | NA | NA | NA |
| -0.04 | -0.01 | -0.02 | 0.05  | 0.34 | 0.88    | 0.31     | 0.012    | NA | NA | NA | NA |
| 0.86  | 0.26  | 0.09  | 0.15  | 0.34 | 0.066   | 0.29     | 0.025    | NA | NA | NA | NA |
| 0.06  | -0.01 | -0.02 | 0.05  | 0.34 | 0.83    | 0.095    | 8.00E-05 | NA | NA | NA | NA |
| 0.05  | 0.06  | -0.02 | -0.06 | 0.34 | 0.31    | 0.47     | 0.0022   | NA | NA | NA | NA |
| 0.07  | -0.05 | 0.04  | 0.04  | 0.34 | 0.16    | 0.44     | 0.22     | NA | NA | NA | NA |
| -0.02 | 0.03  | -0.02 | 0.01  | 0.35 | 0.06    | 0.13     | 0.47     | NA | NA | NA | NA |
| -0.05 | -0.06 | -0.06 | 0.14  | 0.35 | 0.046   | 0.11     | 0.00036  | NA | NA | NA | NA |
| 0.04  | 0.04  | 0.02  | 0.01  | 0.35 | 0.21    | 0.25     | 0.45     | NA | NA | NA | NA |
| 0.06  | 0.06  | 0.02  | 0.12  | 0.35 | 0.23    | 0.38     | 2.20E-06 | NA | NA | NA | NA |
| 0.03  | -0.01 | -0.06 | 0.04  | 0.36 | 0.9     | 3.10E-06 | 0.012    | NA | NA | NA | NA |
| 0.06  | 0.04  | -0.04 | -0.01 | 0.37 | 0.096   | 0.017    | 0.57     | NA | NA | NA | NA |
| -0.14 | -0.01 | 0.02  | 0.03  | 0.38 | 1       | 0.87     | 0.67     | NA | NA | NA | NA |
| 0.02  | 0.04  | -0.01 | -0.03 | 0.38 | 0.015   | 0.6      | 0.021    | NA | NA | NA | NA |
| 0.08  | 0.14  | 0.03  | 0     | 0.38 | 0.00023 | 0.12     | 0.89     | NA | NA | NA | NA |
| -0.04 | -0.02 | -0.07 | 0.01  | 0.38 | 0.71    | 1.10E-06 | 0.77     | NA | NA | NA | NA |
| 0.09  | -0.01 | 0.04  | 0.08  | 0.38 | 0.94    | 0.59     | 0.21     | NA | NA | NA | NA |
| -0.09 | 0.28  | -0.01 | 0.05  | 0.38 | 0.028   | 0.7      | 0.12     | NA | NA | NA | NA |
| 0.11  | 0.07  | -0.07 | 0     | 0.38 | 0.15    | 0.0028   | 0.96     | NA | NA | NA | NA |
| 0.13  | -0.03 | -0.12 | -0.11 | 0.39 | 0.57    | 0.00013  | 0.00024  | NA | NA | NA | NA |
| 0.85  | 0.08  | 0.01  | -0.03 | 0.39 | 0.56    | 1        | 0.82     | NA | NA | NA | NA |
| 0.03  | 0.03  | -0.02 | 0.04  | 0.39 | 0.16    | 0.059    | 0.0022   | NA | NA | NA | NA |
| 0.05  | 0.07  | -0.03 | -0.03 | 0.39 | 0.054   | 0.26     | 0.24     | NA | NA | NA | NA |
| 0.12  | 0.06  | -0.01 | -0.01 | 0.4  | 0.54    | 0.77     | 0.95     | NA | NA | NA | NA |
| -0.07 | 0     | 0     | -0.04 | 0.4  | 1       | 1        | 0.24     | NA | NA | NA | NA |
| 0.08  | 0.07  | -0.06 | -0.04 | 0.4  | 0.23    | 0.0027   | 0.085    | NA | NA | NA | NA |
| -0.15 | 0.09  | -0.27 | -0.42 | 0.4  | 1       | 0.34     | 0.011    | NA | NA | NA | NA |
| 0.04  | 0.02  | -0.05 | -0.03 | 0.4  | 0.48    | 0.036    | 0.23     | NA | NA | NA | NA |

|       |       |       |       |      |          |          |          |    |    |    |    |
|-------|-------|-------|-------|------|----------|----------|----------|----|----|----|----|
| -0.02 | 0.01  | -0.03 | -0.01 | 0.41 | 0.85     | 0.11     | 0.48     | NA | NA | NA | NA |
| 0.1   | 0.16  | -0.02 | 0     | 0.41 | 0.053    | 0.26     | 1        | NA | NA | NA | NA |
| 0.02  | -0.01 | -0.07 | -0.01 | 0.41 | 0.77     | 0.00075  | 0.9      | NA | NA | NA | NA |
| -0.06 | -0.04 | -0.07 | -0.03 | 0.41 | 0.48     | 0.028    | 0.35     | NA | NA | NA | NA |
| 0.02  | 0.01  | -0.03 | -0.02 | 0.41 | 0.83     | 0.16     | 0.38     | NA | NA | NA | NA |
| 0.03  | -0.1  | -0.02 | 0     | 0.41 | 4.70E-07 | 0.18     | 0.95     | NA | NA | NA | NA |
| 0.05  | -0.02 | -0.02 | 0.02  | 0.41 | 0.76     | 0.67     | 0.73     | NA | NA | NA | NA |
| -0.03 | -0.06 | -0.03 | -0.03 | 0.41 | 0.0049   | 0.028    | 0.03     | NA | NA | NA | NA |
| -0.04 | -0.03 | -0.05 | -0.05 | 0.41 | 0.39     | 0.014    | 0.045    | NA | NA | NA | NA |
| 0.15  | 0.03  | 0.02  | 0.01  | 0.42 | 0.77     | 0.83     | 1        | NA | NA | NA | NA |
| 0.09  | -0.03 | 0.01  | 0.09  | 0.42 | 0.73     | 0.61     | 5.90E-08 | NA | NA | NA | NA |
| 0.17  | 0.17  | 0     | -0.05 | 0.43 | 0.39     | 1        | 0.72     | NA | NA | NA | NA |
| 0.05  | 0.09  | 0.02  | 0     | 0.43 | 0.088    | 0.48     | 0.94     | NA | NA | NA | NA |
| -0.09 | 0.03  | 0.02  | 0     | 0.43 | 0.57     | 0.62     | 1        | NA | NA | NA | NA |
| 0.02  | -0.02 | -0.04 | -0.05 | 0.44 | 0.21     | 0.0078   | 0.0014   | NA | NA | NA | NA |
| 0.02  | 0.05  | -0.01 | 0.02  | 0.44 | 0.015    | 0.55     | 0.39     | NA | NA | NA | NA |
| 0.05  | 0     | -0.11 | -0.07 | 0.44 | 1        | 1.00E-05 | 0.015    | NA | NA | NA | NA |
| 0.06  | 0.05  | -0.01 | -0.08 | 0.44 | 0.17     | 0.77     | 0.055    | NA | NA | NA | NA |
| 0.13  | -0.07 | -0.08 | -0.05 | 0.44 | 0.69     | 0.056    | 0.27     | NA | NA | NA | NA |
| 0.03  | 0.12  | -0.01 | 0.05  | 0.44 | 6.30E-05 | 0.42     | 0.0057   | NA | NA | NA | NA |
| -0.25 | -0.17 | 0.04  | -0.01 | 0.45 | 1        | 0.82     | 1        | NA | NA | NA | NA |
| 0.03  | 0.03  | -0.04 | 0.04  | 0.45 | 0.46     | 0.0092   | 0.0099   | NA | NA | NA | NA |
| 0.03  | 0     | 0     | 0.02  | 0.46 | 1        | 1        | 0.47     | NA | NA | NA | NA |
| -0.04 | -0.02 | -0.05 | 0.02  | 0.46 | 0.9      | 0.031    | 0.59     | NA | NA | NA | NA |
| 0.05  | -0.04 | -0.05 | -0.04 | 0.46 | 0.15     | 0.002    | 0.062    | NA | NA | NA | NA |
| -0.08 | 0.02  | -0.09 | -0.08 | 0.46 | 1        | 0.017    | 0.032    | NA | NA | NA | NA |
| -0.03 | 0.01  | -0.01 | 0.01  | 0.46 | 0.76     | 0.53     | 0.51     | NA | NA | NA | NA |
| 0.02  | 0.01  | -0.03 | 0.02  | 0.46 | 0.42     | 0.0011   | 0.12     | NA | NA | NA | NA |
| 0.03  | 0.08  | -0.02 | 0.01  | 0.47 | 0.0089   | 0.39     | 0.46     | NA | NA | NA | NA |
| 0.15  | -0.03 | -0.06 | -0.03 | 0.47 | 0.52     | 0.014    | 0.2      | NA | NA | NA | NA |

|       |       |       |       |      |          |          |         |    |    |    |    |
|-------|-------|-------|-------|------|----------|----------|---------|----|----|----|----|
| 0.07  | 0.12  | -0.02 | 0.02  | 0.47 | 0.019    | 0.4      | 0.55    | NA | NA | NA | NA |
| 0.19  | 0.47  | -0.01 | 0.08  | 0.47 | 0.0024   | 0.78     | 0.037   | NA | NA | NA | NA |
| 0.01  | 0.01  | -0.04 | 0     | 0.47 | 0.44     | 0.0031   | 0.87    | NA | NA | NA | NA |
| 0.07  | 0     | -0.04 | 0.06  | 0.47 | 1        | 0.022    | 0.002   | NA | NA | NA | NA |
| 0.09  | 0.08  | 0.02  | 0.03  | 0.48 | 0.52     | 0.58     | 0.6     | NA | NA | NA | NA |
| 0.01  | 0.06  | -0.04 | -0.01 | 0.48 | 0.00067  | 0.0071   | 0.72    | NA | NA | NA | NA |
| 0.04  | 0     | -0.01 | 0.12  | 0.48 | 1        | 0.89     | 0.001   | NA | NA | NA | NA |
| -0.02 | -0.02 | -0.02 | -0.04 | 0.48 | 0.79     | 0.75     | 0.3     | NA | NA | NA | NA |
| -0.02 | 0.09  | 0     | 0     | 0.48 | 0.00036  | 0.95     | 0.8     | NA | NA | NA | NA |
| 0.01  | -0.01 | -0.04 | -0.01 | 0.49 | 0.53     | 0.00023  | 0.37    | NA | NA | NA | NA |
| 0.04  | 0.08  | -0.02 | -0.06 | 0.49 | 0.033    | 0.68     | 0.037   | NA | NA | NA | NA |
| 0.02  | 0.08  | -0.03 | 0.05  | 0.49 | 0.00014  | 0.022    | 0.00075 | NA | NA | NA | NA |
| -0.03 | 0.01  | 0.03  | 0.05  | 0.5  | 0.9      | 0.21     | 0.023   | NA | NA | NA | NA |
| -0.05 | -0.14 | -0.05 | -0.01 | 0.5  | 2.80E-07 | 0.021    | 0.57    | NA | NA | NA | NA |
| -0.02 | -0.01 | -0.02 | 0     | 0.5  | 0.8      | 0.37     | 1       | NA | NA | NA | NA |
| 0.03  | 0.1   | -0.03 | 0.02  | 0.5  | 0.0014   | 0.1      | 0.4     | NA | NA | NA | NA |
| 0.03  | 0.02  | -0.07 | -0.03 | 0.5  | 0.28     | 1.50E-07 | 0.019   | NA | NA | NA | NA |
| 0.03  | -0.06 | -0.04 | 0     | 0.5  | 0.065    | 0.049    | 1       | NA | NA | NA | NA |
| -0.13 | -0.07 | 0.03  | 0.01  | 0.5  | 0.41     | 0.35     | 0.98    | NA | NA | NA | NA |
| 0.02  | 0.01  | -0.03 | -0.02 | 0.5  | 0.48     | 0.072    | 0.2     | NA | NA | NA | NA |
| -0.02 | -0.03 | -0.06 | 0.02  | 0.52 | 0.34     | 0.00025  | 0.43    | NA | NA | NA | NA |
| 0.24  | 0.88  | -0.06 | 0.02  | 0.52 | 0.48     | 0.58     | 1       | NA | NA | NA | NA |
| 0.04  | 0     | -0.05 | 0.03  | 0.52 | 1        | 0.0043   | 0.18    | NA | NA | NA | NA |
| -0.04 | -0.1  | -0.03 | 0.01  | 0.52 | 9.60E-05 | 0.048    | 0.41    | NA | NA | NA | NA |
| -0.33 | -0.23 | NA    | NA    | 0.52 | 0.64     | NA       | NA      | NA | NA | NA | NA |
| 0.57  | -0.13 | -0.03 | -0.08 | 0.53 | 0.98     | 0.86     | 0.94    | NA | NA | NA | NA |
| 0.07  | 0.51  | -0.01 | 0.15  | 0.53 | 0.0055   | 1        | 0.022   | NA | NA | NA | NA |
| -0.01 | 0.03  | -0.06 | 0     | 0.53 | 0.13     | 2.00E-06 | 1       | NA | NA | NA | NA |
| 0.02  | 0.04  | -0.01 | 0.03  | 0.53 | 0.045    | 0.62     | 0.01    | NA | NA | NA | NA |
| -0.02 | -0.04 | 0     | 0.05  | 0.53 | 0.27     | 1        | 0.0035  | NA | NA | NA | NA |



|       |       |       |       |      |          |          |          |    |    |    |    |
|-------|-------|-------|-------|------|----------|----------|----------|----|----|----|----|
| 0.03  | -0.01 | -0.07 | -0.05 | 0.53 | 0.91     | 0.03     | 0.11     | NA | NA | NA | NA |
| 0.03  | 0.06  | -0.06 | 0.06  | 0.53 | 0.13     | 0.002    | 0.0076   | NA | NA | NA | NA |
| 0.03  | 0.03  | -0.05 | 0.03  | 0.53 | 0.55     | 0.32     | 0.62     | NA | NA | NA | NA |
| 0.04  | 0.14  | -0.02 | 0.06  | 0.54 | 0.011    | 0.56     | 0.077    | NA | NA | NA | NA |
| 0.05  | 0.04  | -0.01 | -0.02 | 0.54 | 0.49     | 0.71     | 0.45     | NA | NA | NA | NA |
| 0.12  | 0.04  | 0.02  | 0.02  | 0.54 | 0.88     | 0.77     | 0.8      | NA | NA | NA | NA |
| -0.07 | -0.05 | -0.05 | 0.09  | 0.54 | 0.62     | 0.054    | 0.0022   | NA | NA | NA | NA |
| 0.03  | 0.03  | -0.06 | 0.01  | 0.54 | 0.51     | 0.01     | 0.79     | NA | NA | NA | NA |
| 0.01  | 0     | -0.04 | 0     | 0.55 | 0.88     | 0.0084   | 0.95     | NA | NA | NA | NA |
| 0.01  | 0.01  | -0.04 | 0.01  | 0.55 | 0.58     | 0.0014   | 0.44     | NA | NA | NA | NA |
| 0.03  | 0.07  | 0     | 0.02  | 0.55 | 0.025    | 0.89     | 0.27     | NA | NA | NA | NA |
| 0.02  | -0.01 | -0.06 | 0.02  | 0.57 | 0.77     | 1.90E-05 | 0.35     | NA | NA | NA | NA |
| 0.04  | -0.06 | -0.01 | 0.04  | 0.57 | 0.075    | 0.74     | 0.061    | NA | NA | NA | NA |
| -0.04 | 0.06  | -0.06 | 0     | 0.57 | 0.84     | 0.32     | 1        | NA | NA | NA | NA |
| 0.03  | 0.13  | -0.05 | 0     | 0.57 | 7.60E-05 | 0.015    | 0.88     | NA | NA | NA | NA |
| 0.02  | -0.07 | 0.01  | 0.04  | 0.58 | 0.014    | 0.71     | 0.092    | NA | NA | NA | NA |
| 0.02  | 0.03  | -0.07 | -0.01 | 0.58 | 0.28     | 5.90E-05 | 0.61     | NA | NA | NA | NA |
| -0.09 | 0.09  | -0.13 | -0.1  | 0.58 | 0.51     | 0.0089   | 0.022    | NA | NA | NA | NA |
| -0.03 | -0.04 | -0.11 | -0.05 | 0.58 | 0.26     | 2.50E-06 | 0.037    | NA | NA | NA | NA |
| 0.05  | 0.02  | -0.04 | 0.03  | 0.58 | 0.68     | 0.18     | 0.38     | NA | NA | NA | NA |
| -0.07 | -0.03 | 0     | 0.04  | 0.58 | 0.76     | 1        | 0.31     | NA | NA | NA | NA |
| 0.01  | -0.01 | -0.02 | 0.02  | 0.59 | 0.79     | 0.046    | 0.023    | NA | NA | NA | NA |
| 0.03  | -0.02 | -0.07 | -0.06 | 0.59 | 0.67     | 0.017    | 0.012    | NA | NA | NA | NA |
| 0.02  | 0.18  | -0.09 | -0.06 | 0.59 | 2.80E-06 | 0.0029   | 0.072    | NA | NA | NA | NA |
| -0.05 | 0.03  | -0.06 | 0.03  | 0.59 | 0.9      | 0.045    | 0.42     | NA | NA | NA | NA |
| -0.11 | 0.16  | -0.07 | -0.03 | 0.59 | 0.27     | 0.11     | 0.76     | NA | NA | NA | NA |
| -0.03 | 0.08  | 0.01  | 0.09  | 0.6  | 0.082    | 0.77     | 1.10E-06 | NA | NA | NA | NA |
| -0.03 | -0.08 | -0.02 | -0.01 | 0.6  | 0.021    | 0.4      | 0.61     | NA | NA | NA | NA |
| -0.07 | 0.1   | -0.1  | 0.02  | 0.6  | 0.21     | 0.0091   | 0.77     | NA | NA | NA | NA |
| 0.03  | 0.03  | -0.02 | 0     | 0.6  | 0.24     | 0.54     | 1        | NA | NA | NA | NA |

|       |       |       |       |      |          |          |          |    |    |    |    |
|-------|-------|-------|-------|------|----------|----------|----------|----|----|----|----|
| 0.03  | 0.03  | -0.03 | 0.02  | 0.6  | 0.13     | 0.04     | 0.15     | NA | NA | NA | NA |
| 0.02  | 0.08  | -0.05 | 0.01  | 0.6  | 1.90E-05 | 2.40E-05 | 0.4      | NA | NA | NA | NA |
| 0.04  | 0.08  | 0     | 0.05  | 0.61 | 0.0014   | 1        | 0.0083   | NA | NA | NA | NA |
| 0.04  | -0.01 | -0.06 | 0.03  | 0.61 | 0.66     | 0.046    | 0.38     | NA | NA | NA | NA |
| 0.05  | 0.05  | -0.03 | 0     | 0.61 | 0.19     | 0.16     | 0.92     | NA | NA | NA | NA |
| 0.03  | 0.13  | -0.06 | -0.06 | 0.62 | 0.12     | 0.0031   | 0.014    | NA | NA | NA | NA |
| 0.02  | 0.02  | -0.01 | -0.04 | 0.62 | 0.41     | 0.66     | 0.024    | NA | NA | NA | NA |
| -0.02 | 0.1   | -0.09 | 0.02  | 0.63 | 0.011    | 0.00085  | 0.46     | NA | NA | NA | NA |
| 0.07  | 0.02  | 0.01  | 0.16  | 0.63 | 1        | 1        | 1.20E-08 | NA | NA | NA | NA |
| 0.15  | 0.21  | 0.11  | 0.82  | 0.63 | 0.069    | 0.89     | 0.0033   | NA | NA | NA | NA |
| 0.02  | 0.03  | -0.07 | 0     | 0.63 | 0.36     | 0.00011  | 0.98     | NA | NA | NA | NA |
| -0.02 | -0.11 | -0.02 | -0.01 | 0.63 | 3.30E-05 | 0.34     | 0.56     | NA | NA | NA | NA |
| -0.01 | 0.03  | 0     | 0.05  | 0.63 | 0.19     | 0.99     | 4.10E-05 | NA | NA | NA | NA |
| 0.02  | -0.02 | -0.06 | 0.03  | 0.64 | 0.36     | 0.00024  | 0.17     | NA | NA | NA | NA |
| 0.38  | -0.03 | -0.06 | -0.01 | 0.64 | 0.81     | 0.032    | 0.82     | NA | NA | NA | NA |
| 0.1   | 0.03  | -0.06 | 0.07  | 0.64 | 0.7      | 0.045    | 0.049    | NA | NA | NA | NA |
| -0.02 | 0.05  | -0.02 | 0.01  | 0.65 | 0.13     | 0.3      | 0.44     | NA | NA | NA | NA |
| 0.03  | 0.11  | -0.01 | 0.01  | 0.65 | 0.049    | 0.81     | 0.55     | NA | NA | NA | NA |
| -0.07 | -0.04 | -0.14 | -0.13 | 0.65 | 0.87     | 0.00011  | 0.051    | NA | NA | NA | NA |
| 0.02  | -0.02 | -0.04 | -0.01 | 0.65 | 0.49     | 0.026    | 0.47     | NA | NA | NA | NA |
| 0.03  | 0.08  | 0     | 0.04  | 0.65 | 0.0046   | 0.83     | 0.009    | NA | NA | NA | NA |
| -0.02 | 0.06  | -0.05 | 0     | 0.65 | 0.069    | 0.0024   | 0.95     | NA | NA | NA | NA |
| -0.16 | -0.07 | -0.04 | 0.04  | 0.66 | 1        | 0.084    | 0.38     | NA | NA | NA | NA |
| 0.01  | 0.03  | -0.03 | 0.02  | 0.66 | 0.16     | 0.014    | 0.18     | NA | NA | NA | NA |
| -0.09 | 0.08  | -0.09 | 0     | 0.66 | 0.73     | 2.00E-05 | 0.99     | NA | NA | NA | NA |
| -0.06 | 0.02  | -0.1  | 0.01  | 0.66 | 0.99     | 6.40E-05 | 0.73     | NA | NA | NA | NA |
| 0.02  | 0.05  | -0.04 | -0.03 | 0.66 | 0.18     | 0.0072   | 0.063    | NA | NA | NA | NA |
| -0.05 | -0.17 | -0.04 | -0.03 | 0.66 | 0.0028   | 0.12     | 0.4      | NA | NA | NA | NA |
| 0.02  | 0     | -0.02 | 0     | 0.67 | 1        | 0.4      | 1        | NA | NA | NA | NA |
| 0.06  | 0.02  | -0.1  | 0     | 0.67 | 1        | 0.24     | 1        | NA | NA | NA | NA |

|       |       |       |       |      |          |          |         |    |    |    |    |
|-------|-------|-------|-------|------|----------|----------|---------|----|----|----|----|
| 0.06  | 0.03  | -0.08 | -0.15 | 0.67 | 0.69     | 0.37     | 0.048   | NA | NA | NA | NA |
| 0.08  | NA    | -0.03 | -0.04 | 0.67 | NA       | 0.79     | 0.87    | NA | NA | NA | NA |
| 0.02  | 0.02  | 0.02  | 0.02  | 0.68 | 0.75     | 0.35     | 0.23    | NA | NA | NA | NA |
| -0.04 | 0.03  | -0.07 | 0     | 0.68 | 0.68     | 0.025    | 1       | NA | NA | NA | NA |
| 0.02  | -0.03 | -0.02 | 0.07  | 0.68 | 0.41     | 0.22     | 0.0013  | NA | NA | NA | NA |
| -0.01 | -0.06 | -0.09 | -0.06 | 0.68 | 0.0069   | 2.60E-05 | 0.0015  | NA | NA | NA | NA |
| 0.02  | 0.05  | -0.05 | -0.03 | 0.69 | 0.075    | 0.00095  | 0.032   | NA | NA | NA | NA |
| 0.03  | 0.01  | -0.05 | 0.02  | 0.69 | 0.94     | 0.017    | 0.26    | NA | NA | NA | NA |
| 0.07  | 0.02  | -0.04 | 0.09  | 0.69 | 0.84     | 0.055    | 0.0059  | NA | NA | NA | NA |
| 0.15  | NA    | -0.04 | NA    | 0.69 | NA       | 0.46     | NA      | NA | NA | NA | NA |
| 0.01  | 0.04  | -0.09 | -0.09 | 0.69 | 0.28     | 0.00058  | 0.0062  | NA | NA | NA | NA |
| -0.03 | -0.11 | 0.01  | 0.04  | 0.69 | 0.0023   | 0.77     | 0.25    | NA | NA | NA | NA |
| 0.04  | 0.1   | -0.07 | -0.02 | 0.69 | 0.074    | 0.0021   | 0.45    | NA | NA | NA | NA |
| 0.25  | 0.91  | 0.05  | 0.12  | 0.7  | 4.50E-07 | 0.2      | 0.00015 | NA | NA | NA | NA |
| -0.03 | 0.38  | -0.06 | 0.02  | 0.7  | 2.00E-04 | 0.092    | 0.74    | NA | NA | NA | NA |
| 0.36  | 0.86  | -0.05 | 0.07  | 0.7  | 0.00038  | 0.079    | 0.054   | NA | NA | NA | NA |
| 0.01  | -0.04 | 0.01  | 0     | 0.7  | 0.054    | 0.36     | 0.79    | NA | NA | NA | NA |
| 0.69  | -0.05 | -0.08 | 0     | 0.7  | 0.93     | 0.19     | 1       | NA | NA | NA | NA |
| -0.06 | 0.08  | 0.03  | 0.06  | 0.71 | 0.35     | 0.27     | 0.048   | NA | NA | NA | NA |
| 0.08  | -0.28 | -0.17 | -0.14 | 0.71 | 1.30E-07 | 0.00028  | 0.00097 | NA | NA | NA | NA |
| 0.05  | 0.08  | -0.07 | 0.1   | 0.71 | 0.076    | 0.0066   | 0.0051  | NA | NA | NA | NA |
| -0.02 | 0.03  | -0.01 | 0.01  | 0.71 | 0.3      | 0.58     | 0.63    | NA | NA | NA | NA |
| -0.02 | -0.01 | -0.02 | 0.02  | 0.72 | 0.74     | 0.34     | 0.44    | NA | NA | NA | NA |
| -0.01 | 0.01  | -0.03 | 0.04  | 0.72 | 0.56     | 0.056    | 0.056   | NA | NA | NA | NA |
| 0.02  | 0.15  | -0.03 | 0.06  | 0.73 | 5.70E-05 | 0.074    | 0.0011  | NA | NA | NA | NA |
| 0.08  | -0.01 | -0.06 | 0.02  | 0.73 | 0.93     | 0.06     | 0.67    | NA | NA | NA | NA |
| 0.01  | 0     | -0.05 | 0.01  | 0.73 | 0.9      | 2.70E-05 | 0.36    | NA | NA | NA | NA |
| -0.03 | -0.07 | 0.02  | 0.02  | 0.73 | 0.03     | 0.32     | 0.3     | NA | NA | NA | NA |
| -0.01 | -0.04 | 0.01  | 0     | 0.73 | 0.052    | 0.64     | 0.88    | NA | NA | NA | NA |
| 0.4   | 0.28  | -0.05 | -0.05 | 0.73 | 0.18     | 0.19     | 0.33    | NA | NA | NA | NA |

|       |       |       |       |      |          |          |          |    |    |    |    |
|-------|-------|-------|-------|------|----------|----------|----------|----|----|----|----|
| -0.04 | 0.2   | -0.02 | 0.02  | 0.73 | 0.023    | 0.56     | 0.59     | NA | NA | NA | NA |
| 0.06  | -0.06 | -0.11 | -0.06 | 0.74 | 0.59     | 0.029    | 0.36     | NA | NA | NA | NA |
| 0.06  | 0.33  | -0.02 | -0.05 | 0.74 | 0.0098   | 0.56     | 0.098    | NA | NA | NA | NA |
| 0.03  | -0.03 | 0.03  | 0.07  | 0.75 | 0.71     | 0.42     | 0.073    | NA | NA | NA | NA |
| 0.18  | 0.2   | 0.01  | -0.01 | 0.75 | 0.03     | 0.91     | 0.93     | NA | NA | NA | NA |
| 0.04  | 0     | -0.04 | -0.06 | 0.75 | 1        | 0.075    | 0.00072  | NA | NA | NA | NA |
| 0.01  | 0.04  | -0.02 | -0.01 | 0.76 | 0.082    | 0.23     | 0.36     | NA | NA | NA | NA |
| 0.09  | -0.01 | 0.01  | 0.06  | 0.76 | 1        | 0.64     | 0.0053   | NA | NA | NA | NA |
| 0.05  | 0.14  | -0.04 | 0.27  | 0.76 | 0.34     | 0.42     | 0.00026  | NA | NA | NA | NA |
| 0.03  | 0.09  | -0.03 | -0.03 | 0.76 | 0.014    | 0.11     | 0.2      | NA | NA | NA | NA |
| 0.01  | -0.01 | 0     | 0.02  | 0.76 | 0.73     | 0.97     | 0.13     | NA | NA | NA | NA |
| -0.09 | NA    | -0.04 | 0.02  | 0.76 | NA       | 0.47     | 0.76     | NA | NA | NA | NA |
| 0.11  | 0.36  | -0.08 | 0.02  | 0.77 | 0.092    | 0.00023  | 0.55     | NA | NA | NA | NA |
| 0.11  | 0.07  | 0.13  | 0.02  | 0.77 | 0.61     | 0.0029   | 0.91     | NA | NA | NA | NA |
| 0.02  | 0.16  | -0.04 | 0     | 0.77 | 0.0059   | 0.016    | 1        | NA | NA | NA | NA |
| 0.04  | 0.27  | 0     | 0.08  | 0.77 | 0.00021  | 0.85     | 0.00049  | NA | NA | NA | NA |
| -0.01 | 0.03  | -0.07 | -0.02 | 0.77 | 0.3      | 3.40E-06 | 0.16     | NA | NA | NA | NA |
| 0.03  | 0.06  | -0.03 | 0.08  | 0.78 | 0.064    | 0.5      | 0.13     | NA | NA | NA | NA |
| 0.04  | -0.05 | -0.11 | 0     | 0.78 | 0.63     | 0.00063  | 1        | NA | NA | NA | NA |
| -0.03 | 0.07  | -0.01 | 0.05  | 0.78 | 0.44     | 0.88     | 0.2      | NA | NA | NA | NA |
| 0.2   | 0.07  | -0.35 | -0.24 | 0.79 | 1        | 8.90E-06 | 0.0025   | NA | NA | NA | NA |
| -0.06 | 0.11  | 0.09  | 0.07  | 0.79 | 0.4      | 0.017    | 0.024    | NA | NA | NA | NA |
| -0.07 | 0.2   | -0.03 | -0.04 | 0.8  | 1        | 0.26     | 0.2      | NA | NA | NA | NA |
| -0.09 | -0.03 | -0.06 | 0     | 0.81 | 0.68     | 0.18     | 1        | NA | NA | NA | NA |
| 0.03  | 0.33  | -0.04 | 0.18  | 0.81 | 1.10E-07 | 0.39     | 3.40E-06 | NA | NA | NA | NA |
| 0.16  | 0.15  | -0.03 | 0.05  | 0.81 | 0.15     | 0.37     | 0.091    | NA | NA | NA | NA |
| 0.05  | 0.03  | -0.05 | 0.04  | 0.81 | 0.48     | 0.012    | 0.088    | NA | NA | NA | NA |
| 0.01  | 0.04  | 0     | 0.04  | 0.82 | 0.014    | 1        | 0.002    | NA | NA | NA | NA |
| 0.06  | 0.05  | -0.01 | 0.04  | 0.82 | 0.32     | 0.58     | 0.077    | NA | NA | NA | NA |
| -0.04 | -0.01 | 0.01  | 0.05  | 0.82 | 0.79     | 0.51     | 0.0095   | NA | NA | NA | NA |

|       |       |       |       |      |          |          |          |    |    |    |    |
|-------|-------|-------|-------|------|----------|----------|----------|----|----|----|----|
| 0.16  | 0     | -0.01 | 0.07  | 0.83 | 1        | 0.68     | 0.0024   | NA | NA | NA | NA |
| 0.35  | -0.28 | -0.41 | 0.26  | 0.83 | 0.074    | 4.30E-06 | 0.16     | NA | NA | NA | NA |
| -0.01 | -0.02 | -0.04 | 0     | 0.84 | 0.4      | 0.0039   | 1        | NA | NA | NA | NA |
| 0.05  | 0.02  | -0.1  | 0.05  | 0.84 | 0.99     | 0.024    | 0.38     | NA | NA | NA | NA |
| 0.01  | 0.02  | -0.03 | 0.06  | 0.84 | 0.57     | 0.082    | 0.00012  | NA | NA | NA | NA |
| -0.01 | -0.03 | -0.08 | -0.02 | 0.85 | 0.2      | 8.40E-08 | 0.37     | NA | NA | NA | NA |
| 0.02  | 0     | -0.08 | -0.02 | 0.85 | 1        | 0.0016   | 0.47     | NA | NA | NA | NA |
| -0.01 | 0.01  | -0.04 | -0.03 | 0.85 | 0.81     | 0.022    | 0.072    | NA | NA | NA | NA |
| 0.01  | 0.08  | -0.01 | 0     | 0.86 | 0.00026  | 0.64     | 0.99     | NA | NA | NA | NA |
| 0.05  | 0.05  | -0.06 | 0.12  | 0.86 | 0.64     | 0.022    | 2.00E-04 | NA | NA | NA | NA |
| -0.08 | 0.1   | -0.05 | -0.07 | 0.87 | 0.39     | 0.43     | 0.17     | NA | NA | NA | NA |
| 0.01  | 0.01  | -0.16 | -0.14 | 0.87 | 0.9      | 1.10E-07 | 1.10E-07 | NA | NA | NA | NA |
| 0.09  | 0.13  | -0.15 | -0.12 | 0.87 | 0.33     | 4.20E-05 | 0.0014   | NA | NA | NA | NA |
| -0.03 | 0.07  | 0.04  | 0.01  | 0.87 | 0.31     | 0.44     | 0.82     | NA | NA | NA | NA |
| 0.01  | 0.11  | -0.02 | 0     | 0.87 | 0.00039  | 0.14     | 0.84     | NA | NA | NA | NA |
| 0.05  | -0.1  | 0.02  | 0.02  | 0.87 | 0.33     | 0.59     | 0.48     | NA | NA | NA | NA |
| -0.02 | -0.01 | -0.05 | -0.01 | 0.87 | 0.65     | 0.06     | 0.71     | NA | NA | NA | NA |
| 0.02  | 0.26  | 0     | 0     | 0.88 | 1.10E-06 | 1        | 1        | NA | NA | NA | NA |
| -0.05 | 0.68  | -0.19 | -0.15 | 0.89 | 0.044    | 0.058    | 0.14     | NA | NA | NA | NA |
| -0.01 | -0.04 | -0.02 | 0.09  | 0.9  | 0.19     | 0.27     | 4.70E-07 | NA | NA | NA | NA |
| -0.01 | 0.02  | -0.03 | 0.01  | 0.9  | 0.68     | 0.022    | 0.66     | NA | NA | NA | NA |
| -0.01 | -0.02 | 0     | 0.03  | 0.9  | 0.54     | 1        | 0.053    | NA | NA | NA | NA |
| 0     | 0.01  | -0.03 | 0     | 0.9  | 0.73     | 0.0096   | 0.78     | NA | NA | NA | NA |
| -0.25 | 0.5   | -0.08 | NA    | 0.9  | 1        | 0.56     | NA       | NA | NA | NA | NA |
| 0.05  | 0.05  | -0.05 | 0.1   | 0.91 | 0.88     | 0.047    | 0.026    | NA | NA | NA | NA |
| 0.01  | -0.06 | 0     | 0.03  | 0.91 | 0.11     | 1        | 0.079    | NA | NA | NA | NA |
| 0.01  | 0.02  | -0.02 | 0.01  | 0.91 | 0.34     | 0.12     | 0.75     | NA | NA | NA | NA |
| 0.15  | -0.05 | 0.19  | 0.34  | 0.91 | 0.65     | 0.017    | 1.90E-05 | NA | NA | NA | NA |
| -0.62 | NA    | 0.02  | 0.1   | 0.91 | NA       | 0.67     | 0.059    | NA | NA | NA | NA |
| -0.05 | 0.2   | 0.03  | -0.01 | 0.92 | 0.00055  | 0.53     | 0.96     | NA | NA | NA | NA |

|       |       |       |       |      |          |          |          |    |    |    |    |
|-------|-------|-------|-------|------|----------|----------|----------|----|----|----|----|
| 0.14  | 0.02  | -0.06 | 0     | 0.92 | 0.91     | 0.068    | 1        | NA | NA | NA | NA |
| -0.03 | 0.01  | -0.2  | -0.17 | 0.92 | 0.95     | 1.80E-09 | 3.50E-05 | NA | NA | NA | NA |
| -0.01 | -0.04 | -0.03 | 0.03  | 0.92 | 0.036    | 0.082    | 0.098    | NA | NA | NA | NA |
| 0.36  | 0.19  | 0.12  | 0.17  | 0.92 | 0.57     | 0.055    | 0.0042   | NA | NA | NA | NA |
| 0.19  | -0.02 | -0.01 | 0.03  | 0.92 | 0.8      | 0.69     | 0.26     | NA | NA | NA | NA |
| -0.01 | -0.05 | -0.04 | 0.02  | 0.92 | 0.011    | 0.00058  | 0.3      | NA | NA | NA | NA |
| 0.02  | 0.05  | -0.05 | 0     | 0.92 | 0.77     | 0.037    | 1        | NA | NA | NA | NA |
| -0.01 | -0.02 | -0.04 | 0.06  | 0.93 | 0.68     | 0.065    | 0.0055   | NA | NA | NA | NA |
| -0.01 | -0.02 | -0.07 | 0.02  | 0.93 | 0.82     | 0.026    | 0.7      | NA | NA | NA | NA |
| 0.01  | 0.03  | -0.04 | 0.06  | 0.93 | 0.71     | 0.06     | 0.025    | NA | NA | NA | NA |
| -0.01 | 0     | -0.06 | 0.05  | 0.93 | 1        | 0.00021  | 0.0042   | NA | NA | NA | NA |
| 0.01  | 0.01  | -0.03 | -0.02 | 0.93 | 0.84     | 0.41     | 0.36     | NA | NA | NA | NA |
| 0.03  | 0.06  | -0.04 | 0     | 0.94 | 0.1      | 0.025    | 1        | NA | NA | NA | NA |
| 0.01  | -0.04 | -0.01 | 0.08  | 0.94 | 0.17     | 0.4      | 5.10E-07 | NA | NA | NA | NA |
| 0.01  | 0.1   | 0.01  | 0     | 0.94 | 9.60E-06 | 0.74     | 0.8      | NA | NA | NA | NA |
| -0.09 | -0.3  | -0.1  | 0.52  | 0.95 | 0.19     | 0.004    | 4.00E-04 | NA | NA | NA | NA |
| 0.03  | -0.06 | -0.01 | 0.02  | 0.95 | 0.51     | 0.57     | 0.41     | NA | NA | NA | NA |
| 0.05  | NA    | 0.05  | 0.29  | 0.95 | NA       | 0.11     | 1.00E-09 | NA | NA | NA | NA |
| 0.03  | 0.12  | -0.03 | 0.04  | 0.95 | 0.0079   | 0.18     | 0.15     | NA | NA | NA | NA |
| 0.06  | -0.03 | -0.03 | 0.07  | 0.95 | 0.57     | 0.057    | 2.20E-05 | NA | NA | NA | NA |
| -0.01 | -0.04 | 0.01  | 0     | 0.96 | 0.19     | 0.87     | 0.98     | NA | NA | NA | NA |
| -0.01 | 0.13  | -0.03 | 0.01  | 0.96 | 0.0062   | 0.18     | 0.66     | NA | NA | NA | NA |
| 0.05  | -0.08 | -0.12 | -0.09 | 0.96 | 0.77     | 0.0078   | 0.1      | NA | NA | NA | NA |
| -0.08 | -0.29 | 0     | -0.01 | 0.97 | 0.0024   | 0.93     | 0.99     | NA | NA | NA | NA |
| 0.01  | -0.01 | -0.06 | -0.05 | 0.97 | 0.88     | 0.012    | 0.041    | NA | NA | NA | NA |
| -0.01 | 0     | -0.07 | 0.01  | 0.97 | 1        | 6.40E-06 | 0.51     | NA | NA | NA | NA |
| -0.01 | 0.09  | -0.13 | -0.08 | 0.97 | 0.024    | 1.60E-05 | 0.029    | NA | NA | NA | NA |
| 0.04  | 0.07  | 0.02  | 0.03  | 0.98 | 0.22     | 0.42     | 0.3      | NA | NA | NA | NA |
| -0.03 | 0.17  | -0.05 | -0.05 | 0.99 | 0.025    | 0.2      | 0.13     | NA | NA | NA | NA |
| -0.01 | -0.07 | -0.05 | -0.02 | 0.99 | 0.64     | 0.017    | 0.43     | NA | NA | NA | NA |

|       |       |       |       |      |        |          |          |    |    |    |    |
|-------|-------|-------|-------|------|--------|----------|----------|----|----|----|----|
| 0     | 0.05  | -0.04 | -0.01 | 0.99 | 0.022  | 0.045    | 0.53     | NA | NA | NA | NA |
| 0.09  | 0     | -0.02 | -0.04 | 0.99 | 1      | 0.45     | 0.11     | NA | NA | NA | NA |
| 0.04  | 0.11  | -0.08 | -0.04 | 0.99 | 0.31   | 0.0026   | 0.17     | NA | NA | NA | NA |
| 0.03  | 0.29  | -0.08 | 0.03  | 1    | 0.042  | 0.034    | 0.4      | NA | NA | NA | NA |
| 0.01  | -0.01 | 0.01  | 0.13  | 1    | 0.99   | 0.74     | 2.30E-07 | NA | NA | NA | NA |
| 0.06  | NA    | -0.13 | -0.03 | 1    | NA     | 0.074    | 0.86     | NA | NA | NA | NA |
| 0.02  | 0.01  | -0.09 | -0.04 | 1    | 1      | 0.004    | 0.19     | NA | NA | NA | NA |
| 0.01  | 0     | -0.08 | -0.04 | 1    | 1      | 0.00049  | 0.13     | NA | NA | NA | NA |
| 0.01  | 0.05  | 0.01  | -0.04 | 1    | 0.69   | 0.96     | 0.25     | NA | NA | NA | NA |
| -0.02 | -0.02 | 0.02  | -0.05 | 1    | 1      | 0.73     | 0.16     | NA | NA | NA | NA |
| 0.01  | -0.11 | -0.03 | 0.05  | 1    | 0.029  | 0.17     | 0.033    | NA | NA | NA | NA |
| 0     | 0.01  | -0.02 | -0.01 | 1    | 0.73   | 0.44     | 0.8      | NA | NA | NA | NA |
| 0     | 0.13  | -0.04 | 0.04  | 1    | 0.014  | 0.058    | 0.045    | NA | NA | NA | NA |
| 0.06  | 0.31  | -0.05 | 0     | 1    | 0.0058 | 0.38     | 1        | NA | NA | NA | NA |
| 0     | 0.03  | -0.03 | 0.03  | 1    | 0.61   | 0.15     | 0.17     | NA | NA | NA | NA |
| 0     | -0.48 | 0.38  | -0.19 | 1    | 0.15   | 1        | 0.3      | NA | NA | NA | NA |
| 0     | 0.03  | -0.01 | 0     | 1    | 0.37   | 0.54     | 1        | NA | NA | NA | NA |
| 0.02  | 0.04  | -0.05 | -0.02 | 1    | 0.87   | 0.057    | 0.6      | NA | NA | NA | NA |
| 0     | 0.01  | -0.04 | 0.01  | 1    | 0.92   | 0.12     | 0.76     | NA | NA | NA | NA |
| 0     | 0.04  | -0.12 | -0.08 | 1    | 0.48   | 4.10E-07 | 0.0014   | NA | NA | NA | NA |
| 0     | 0.05  | -0.01 | 0     | 1    | 0.23   | 0.51     | 0.87     | NA | NA | NA | NA |
| 0.01  | -0.02 | -0.08 | -0.01 | 1    | 0.66   | 0.00012  | 0.74     | NA | NA | NA | NA |
| 0.01  | 0.05  | -0.03 | 0.03  | 1    | 0.29   | 0.29     | 0.48     | NA | NA | NA | NA |
| -0.04 | -0.01 | 0.01  | 0.08  | 1    | 1      | 0.83     | 0.043    | NA | NA | NA | NA |
| -0.03 | -0.05 | -0.05 | 0.08  | 1    | 0.86   | 0.31     | 0.026    | NA | NA | NA | NA |
| 0.13  | 0.13  | -0.06 | -0.12 | 1    | 0.64   | 0.33     | 0.014    | NA | NA | NA | NA |
| 0     | 0.03  | -0.05 | 0.03  | 1    | 0.2    | 9.40E-06 | 0.03     | NA | NA | NA | NA |
| 0.01  | 0.01  | 0.02  | 0.03  | 1    | 0.94   | 0.26     | 0.22     | NA | NA | NA | NA |
| -0.01 | 0.11  | 0.03  | 0.25  | 1    | 0.18   | 0.7      | 5.90E-05 | NA | NA | NA | NA |
| 0.01  | 0.01  | 0.21  | 0.04  | 1    | 0.92   | 0.41     | 0.38     | NA | NA | NA | NA |

|       |       |       |       |   |          |          |          |    |    |    |    |
|-------|-------|-------|-------|---|----------|----------|----------|----|----|----|----|
| -0.01 | -0.03 | -0.01 | 0.01  | 1 | 0.29     | 0.58     | 0.5      | NA | NA | NA | NA |
| 0.03  | NA    | -0.04 | 0.47  | 1 | NA       | 0.68     | 4.20E-06 | NA | NA | NA | NA |
| 0     | 0.01  | -0.03 | 0.05  | 1 | 0.76     | 0.18     | 0.12     | NA | NA | NA | NA |
| 0.09  | 0.07  | -0.14 | -0.12 | 1 | 0.81     | 0.03     | 0.0077   | NA | NA | NA | NA |
| -0.01 | 0     | -0.08 | 0.02  | 1 | 1        | 0.71     | 0.83     | NA | NA | NA | NA |
| 0     | 0.03  | -0.09 | 0.01  | 1 | 0.61     | 0.026    | 0.98     | NA | NA | NA | NA |
| -0.01 | 0.02  | -0.03 | 0.03  | 1 | 1        | 0.17     | 0.24     | NA | NA | NA | NA |
| 0.03  | -0.02 | -0.03 | -0.03 | 1 | 1        | 0.51     | 0.44     | NA | NA | NA | NA |
| -0.02 | 0.13  | -0.02 | 0.12  | 1 | 0.34     | 0.63     | 0.00045  | NA | NA | NA | NA |
| -0.02 | 0.45  | -0.02 | 0.12  | 1 | 0.028    | 0.59     | 0.0019   | NA | NA | NA | NA |
| 0.03  | 0.11  | -0.04 | 0.07  | 1 | 0.15     | 0.23     | 0.1      | NA | NA | NA | NA |
| 0     | NA    | NA    | NA    | 1 | NA       | NA       | NA       | NA | NA | NA | NA |
| -0.04 | -0.07 | -0.06 | 0.04  | 1 | 0.15     | 0.03     | 0.13     | NA | NA | NA | NA |
| 0     | 0.09  | -0.03 | 0.01  | 1 | 0.0044   | 0.32     | 0.67     | NA | NA | NA | NA |
| 0.04  | 0.08  | 0.09  | 0.01  | 1 | 1        | 0.046    | 0.88     | NA | NA | NA | NA |
| 0     | 0.05  | -0.1  | -0.06 | 1 | 0.53     | 4.40E-06 | 0.0096   | NA | NA | NA | NA |
| 0.01  | 0.01  | -0.07 | -0.04 | 1 | 1        | 0.00011  | 0.068    | NA | NA | NA | NA |
| 0.01  | -0.06 | 0.03  | 0.03  | 1 | 0.86     | 0.47     | 0.37     | NA | NA | NA | NA |
| -0.01 | -0.01 | -0.22 | -0.19 | 1 | 1        | 8.70E-05 | 0.0031   | NA | NA | NA | NA |
| 0.01  | 0.07  | 0     | 0.09  | 1 | 0.25     | 0.88     | 0.0012   | NA | NA | NA | NA |
| 0     | -0.09 | -0.02 | 0.03  | 1 | 0.27     | 0.32     | 0.26     | NA | NA | NA | NA |
| 0.03  | NA    | 0.02  | -0.04 | 1 | NA       | 0.87     | 0.53     | NA | NA | NA | NA |
| 0.1   | 0.35  | -0.05 | 0.12  | 1 | 1.50E-05 | 0.25     | 0.018    | NA | NA | NA | NA |
| 0.06  | 0.03  | -0.03 | 0.08  | 1 | 1        | 0.59     | 0.16     | NA | NA | NA | NA |
| 0.01  | 0.23  | -0.03 | 0.07  | 1 | 0.0032   | 0.26     | 0.015    | NA | NA | NA | NA |
| 0.07  | 0.06  | -0.06 | -0.06 | 1 | 0.97     | 0.019    | 0.021    | NA | NA | NA | NA |
| 0.05  | 0.15  | -0.02 | -0.01 | 1 | 0.11     | 0.47     | 0.84     | NA | NA | NA | NA |
| -0.02 | 0.05  | -0.02 | -0.01 | 1 | 1        | 0.78     | 0.84     | NA | NA | NA | NA |
| 0     | 0.2   | -0.04 | 0     | 1 | 0.032    | 0.11     | 1        | NA | NA | NA | NA |
| -0.04 | -0.1  | -0.05 | -0.04 | 1 | 0.54     | 0.096    | 0.28     | NA | NA | NA | NA |



|       |       |       |       |   |         |          |         |    |    |    |    |
|-------|-------|-------|-------|---|---------|----------|---------|----|----|----|----|
| 0.01  | 0.19  | -0.06 | -0.03 | 1 | 0.04    | 0.11     | 0.37    | NA | NA | NA | NA |
| 0     | 0.03  | -0.06 | -0.03 | 1 | 0.79    | 0.064    | 0.59    | NA | NA | NA | NA |
| 0.11  | 0.3   | -0.02 | 0.02  | 1 | 0.00015 | 0.52     | 0.54    | NA | NA | NA | NA |
| 0     | -0.03 | -0.08 | -0.08 | 1 | 0.55    | 0.01     | 0.018   | NA | NA | NA | NA |
| 0.01  | 0.04  | -0.01 | 0.1   | 1 | 0.71    | 0.81     | 0.018   | NA | NA | NA | NA |
| -0.02 | -0.03 | -0.03 | 0.08  | 1 | 0.91    | 0.65     | 0.089   | NA | NA | NA | NA |
| 0.08  | -0.33 | -0.04 | 0.03  | 1 | 0.058   | 0.3      | 0.65    | NA | NA | NA | NA |
| -0.01 | 0.06  | -0.04 | 0.1   | 1 | 0.57    | 0.12     | 0.0035  | NA | NA | NA | NA |
| 0.08  | 0.21  | -0.01 | 0.21  | 1 | 0.37    | 1        | 0.0041  | NA | NA | NA | NA |
| 0.18  | -0.2  | -0.13 | 0.06  | 1 | 0.08    | 0.046    | 0.71    | NA | NA | NA | NA |
| 0.02  | -0.02 | -0.04 | 0     | 1 | 0.98    | 0.18     | 1       | NA | NA | NA | NA |
| -0.04 | 0.27  | -0.07 | 0.04  | 1 | 0.39    | 0.1      | 0.39    | NA | NA | NA | NA |
| 0.02  | -0.02 | 0.02  | 0.09  | 1 | 0.84    | 0.54     | 0.014   | NA | NA | NA | NA |
| -0.02 | 0.06  | 0.02  | NA    | 1 | 0.67    | 0.94     | NA      | NA | NA | NA | NA |
| -0.02 | 0.02  | 0.02  | 0.07  | 1 | 0.77    | 0.39     | 0.00051 | NA | NA | NA | NA |
| 0.02  | 0.09  | -0.03 | 0.04  | 1 | 0.9     | 0.46     | 0.52    | NA | NA | NA | NA |
| 0     | -0.05 | -0.09 | -0.06 | 1 | 0.16    | 0.0071   | 0.14    | NA | NA | NA | NA |
| 0     | -0.05 | -0.05 | 0.01  | 1 | 0.022   | 8.10E-06 | 0.35    | NA | NA | NA | NA |
| -0.01 | 0.01  | -0.04 | -0.03 | 1 | 1       | 0.26     | 0.35    | NA | NA | NA | NA |
| 0.02  | 0.03  | -0.05 | -0.04 | 1 | 0.48    | 0.027    | 0.059   | NA | NA | NA | NA |
| 0     | 0.06  | -0.02 | 0     | 1 | 0.055   | 0.31     | 0.98    | NA | NA | NA | NA |
| 0     | 0.09  | -0.05 | -0.04 | 1 | 0.0064  | 0.065    | 0.064   | NA | NA | NA | NA |
| -0.01 | -0.03 | -0.04 | 0     | 1 | 0.93    | 0.12     | 0.99    | NA | NA | NA | NA |
| -0.33 | -0.31 | -0.21 | 0.17  | 1 | 1       | 0.8      | 1       | NA | NA | NA | NA |
| 0.02  | -0.02 | -0.05 | -0.05 | 1 | 0.91    | 0.12     | 0.055   | NA | NA | NA | NA |
| 0     | -0.02 | -0.06 | 0.02  | 1 | 1       | 0.0031   | 0.54    | NA | NA | NA | NA |
| 0.06  | 0.29  | 0.07  | 0.05  | 1 | 0.00036 | 0.046    | 0.12    | NA | NA | NA | NA |
| 0.04  | 0.12  | -0.02 | 0.06  | 1 | 0.26    | 0.51     | 0.11    | NA | NA | NA | NA |
| 0.01  | -0.02 | -0.06 | -0.01 | 1 | 0.76    | 0.0056   | 0.77    | NA | NA | NA | NA |
| 0     | -0.01 | -0.03 | 0     | 1 | 0.55    | 0.25     | 1       | NA | NA | NA | NA |

|       |       |       |       |    |       |          |          |    |    |    |    |
|-------|-------|-------|-------|----|-------|----------|----------|----|----|----|----|
| -0.01 | -0.02 | 0.03  | -0.01 | 1  | 0.71  | 0.27     | 0.75     | NA | NA | NA | NA |
| 0.3   | -0.03 | -0.07 | 0.05  | 1  | 1     | 0.4      | 1        | NA | NA | NA | NA |
| 0     | -0.03 | -0.07 | 0.09  | 1  | 0.6   | 0.0033   | 0.0033   | NA | NA | NA | NA |
| -0.01 | 0.22  | -0.04 | 0.11  | 1  | 0.002 | 0.23     | 0.019    | NA | NA | NA | NA |
| -0.05 | 0.83  | 0.2   | 0.18  | 1  | 0.41  | 0.0018   | 0.0031   | NA | NA | NA | NA |
| -0.01 | 0.1   | -0.07 | 0     | 1  | 0.017 | 2.80E-05 | 0.95     | NA | NA | NA | NA |
| 0     | -0.01 | -0.01 | 0.02  | 1  | 0.88  | 0.43     | 0.23     | NA | NA | NA | NA |
| 0.05  | NA    | 0     | 0.06  | 1  | NA    | 1        | 0.47     | NA | NA | NA | NA |
| 0     | -0.08 | 0.04  | -0.02 | 1  | 0.62  | 0.94     | 0.96     | NA | NA | NA | NA |
| NA    | NA    | 0.01  | 0.07  | NA | NA    | 0.66     | 0.029    | NA | NA | NA | NA |
| NA    | NA    | -0.02 | 0.15  | NA | NA    | 1        | 0.23     | NA | NA | NA | NA |
| NA    | NA    | -0.14 | -0.05 | NA | NA    | 0.017    | 0.45     | NA | NA | NA | NA |
| NA    | NA    | 0.05  | 0.28  | NA | NA    | 0.8      | 0.019    | NA | NA | NA | NA |
| NA    | 0.09  | -0.03 | 0.06  | NA | 0.56  | 0.55     | 0.39     | NA | NA | NA | NA |
| NA    | NA    | -0.18 | 0.34  | NA | NA    | 0.0074   | 0.22     | NA | NA | NA | NA |
| NA    | NA    | NA    | 0.02  | NA | NA    | NA       | 1        | NA | NA | NA | NA |
| NA    | NA    | -0.29 | NA    | NA | NA    | 0.058    | NA       | NA | NA | NA | NA |
| NA    | NA    | 0.01  | 0.28  | NA | NA    | 1        | 9.10E-05 | NA | NA | NA | NA |
| NA    | NA    | 0.05  | 0.77  | NA | NA    | 0.84     | 0.13     | NA | NA | NA | NA |
| NA    | NA    | 0.42  | NA    | NA | NA    | 0.23     | NA       | NA | NA | NA | NA |
| NA    | -0.41 | -0.1  | -0.02 | NA | 0.31  | 0.58     | 1        | NA | NA | NA | NA |
| NA    | NA    | -0.03 | NA    | NA | NA    | 0.61     | NA       | NA | NA | NA | NA |
| NA    | NA    | 0     | NA    | NA | NA    | 1        | NA       | NA | NA | NA | NA |
| NA    | 0.21  | -0.1  | 0.02  | NA | 0.16  | 0.00026  | 0.84     | NA | NA | NA | NA |
| NA    | -0.01 | -0.02 | 0.03  | NA | 1     | 0.55     | 0.41     | NA | NA | NA | NA |
| NA    | -0.25 | -0.02 | -0.02 | NA | 1     | 0.98     | 0.97     | NA | NA | NA | NA |
| NA    | NA    | 0     | NA    | NA | NA    | 1        | NA       | NA | NA | NA | NA |
| NA    | 0.39  | -0.05 | -0.02 | NA | 0.13  | 0.058    | 0.52     | NA | NA | NA | NA |
| NA    | NA    | NA    | NA    | NA | NA    | NA       | NA       | NA | NA | NA | NA |
| NA    | NA    | 0     | NA    | NA | NA    | 1        | NA       | NA | NA | NA | NA |



|    |       |       |       |    |        |          |         |    |    |    |    |
|----|-------|-------|-------|----|--------|----------|---------|----|----|----|----|
| NA | -0.36 | 0.08  | -0.1  | NA | 0.0024 | 0.43     | 0.29    | NA | NA | NA | NA |
| NA | NA    | -0.13 | -0.05 | NA | NA     | 0.51     | 1       | NA | NA | NA | NA |
| NA | NA    | NA    | NA    | NA | NA     | NA       | NA      | NA | NA | NA | NA |
| NA | NA    | 0.5   | NA    | NA | NA     | 1        | NA      | NA | NA | NA | NA |
| NA | -0.08 | -0.1  | -0.05 | NA | 0.29   | 0.12     | 0.49    | NA | NA | NA | NA |
| NA | 0.24  | NA    | NA    | NA | 0.04   | NA       | NA      | NA | NA | NA | NA |
| NA | NA    | -0.01 | 0.06  | NA | NA     | 1        | 0.35    | NA | NA | NA | NA |
| NA | NA    | NA    | NA    | NA | NA     | NA       | NA      | NA | NA | NA | NA |
| NA | NA    | -0.05 | NA    | NA | NA     | 0.94     | NA      | NA | NA | NA | NA |
| NA | NA    | 0.04  | 0.01  | NA | NA     | 0.83     | 1       | NA | NA | NA | NA |
| NA | NA    | -0.09 | -0.05 | NA | NA     | 0.012    | 0.16    | NA | NA | NA | NA |
| NA | NA    | 0.62  | 0.29  | NA | NA     | 0.85     | 0.46    | NA | NA | NA | NA |
| NA | NA    | NA    | NA    | NA | NA     | NA       | NA      | NA | NA | NA | NA |
| NA | NA    | 0     | 0.75  | NA | NA     | 1        | 0.097   | NA | NA | NA | NA |
| NA | NA    | NA    | NA    | NA | NA     | NA       | NA      | NA | NA | NA | NA |
| NA | 0.03  | -0.12 | -0.05 | NA | 1      | 5.30E-05 | 0.13    | NA | NA | NA | NA |
| NA | NA    | -0.01 | 0.17  | NA | NA     | 1        | 0.25    | NA | NA | NA | NA |
| NA | NA    | 0.14  | -0.03 | NA | NA     | 1        | 1       | NA | NA | NA | NA |
| NA | NA    | -0.18 | -0.05 | NA | NA     | 4.80E-05 | 0.28    | NA | NA | NA | NA |
| NA | NA    | -0.19 | -0.22 | NA | NA     | 0.082    | 0.0036  | NA | NA | NA | NA |
| NA | -0.09 | -0.09 | -0.06 | NA | 0.22   | 0.011    | 0.07    | NA | NA | NA | NA |
| NA | 0.06  | -0.02 | 0     | NA | 0.28   | 0.58     | 1       | NA | NA | NA | NA |
| NA | NA    | -0.13 | -0.06 | NA | NA     | 0.0088   | 0.29    | NA | NA | NA | NA |
| NA | 0     | 0.08  | 0.37  | NA | 1      | 0.97     | 0.2     | NA | NA | NA | NA |
| NA | NA    | -0.14 | -0.11 | NA | NA     | 0.00023  | 0.00045 | NA | NA | NA | NA |
| NA | NA    | 0.04  | NA    | NA | NA     | 1        | NA      | NA | NA | NA | NA |
| NA | NA    | NA    | NA    | NA | NA     | NA       | NA      | NA | NA | NA | NA |
| NA | NA    | -0.28 | NA    | NA | NA     | 0.02     | NA      | NA | NA | NA | NA |
| NA | NA    | -0.28 | NA    | NA | NA     | 1        | NA      | NA | NA | NA | NA |
| NA | -0.14 | -0.13 | -0.06 | NA | 0.51   | 0.018    | 0.57    | NA | NA | NA | NA |

|      |       |       |       |          |          |          |         |    |    |    |    |
|------|-------|-------|-------|----------|----------|----------|---------|----|----|----|----|
| NA   | -0.02 | -0.1  | 0.01  | NA       | 0.96     | 4.10E-05 | 0.85    | NA | NA | NA | NA |
| NA   | -0.01 | -0.12 | -0.16 | NA       | 1        | 0.11     | 0.09    | NA | NA | NA | NA |
| NA   | NA    | NA    | 0.44  | NA       | NA       | NA       | 0.11    | NA | NA | NA | NA |
| NA   | NA    | NA    | 0.69  | NA       | NA       | NA       | 0.00013 | NA | NA | NA | NA |
| NA   | NA    | 0.03  | NA    | NA       | NA       | 1        | NA      | NA | NA | NA | NA |
| NA   | NA    | -0.02 | NA    | NA       | NA       | 1        | NA      | NA | NA | NA | NA |
| NA   | NA    | -0.1  | -0.14 | NA       | NA       | 0.23     | 0.68    | NA | NA | NA | NA |
| NA   | NA    | 0.17  | 0.17  | NA       | NA       | 1        | 1       | NA | NA | NA | NA |
| NA   | -0.01 | -0.09 | -0.01 | NA       | 1        | 9.50E-05 | 0.88    | NA | NA | NA | NA |
| NA   | 0.09  | -0.11 | -0.02 | NA       | 0.87     | 5.40E-06 | 0.74    | NA | NA | NA | NA |
| NA   | NA    | -0.06 | 0.1   | NA       | NA       | 0.1      | 0.018   | NA | NA | NA | NA |
| NA   | NA    | -0.06 | 0.11  | NA       | NA       | 0.25     | 0.16    | NA | NA | NA | NA |
| 0.55 | 0.14  | 0.06  | 0.04  | 2.10E-09 | 5.00E-04 | 0.17     | 0.36    | NA | NA | NA | NA |
| 0.56 | 0.13  | -0.05 | 0     | 2.90E-09 | 0.0055   | 0.021    | 0.9     | NA | NA | NA | NA |
| 0.89 | 0.54  | 0.14  | 0.21  | 4.10E-09 | 2.90E-09 | 0.041    | 0.00016 | NA | NA | NA | NA |
| 0.28 | 0.16  | -0.06 | 0     | 1.20E-08 | 4.00E-06 | 0.00058  | 0.92    | NA | NA | NA | NA |
| 0.38 | 0.16  | -0.09 | -0.06 | 2.10E-08 | 0.0049   | 0.001    | 0.067   | NA | NA | NA | NA |
| 0.57 | 0.12  | 0     | 0.1   | 5.10E-08 | 0.71     | 1        | 0.0034  | NA | NA | NA | NA |
| 0.63 | -0.08 | -0.06 | 0     | 6.60E-08 | 0.067    | 0.13     | 1       | NA | NA | NA | NA |
| 0.32 | 0.26  | -0.03 | 0.02  | 1.00E-07 | 7.10E-06 | 0.057    | 0.42    | NA | NA | NA | NA |
| 0.13 | 0.07  | -0.03 | 0.02  | 1.10E-07 | 6.40E-05 | 0.024    | 0.091   | NA | NA | NA | NA |
| 0.28 | 0.12  | -0.03 | -0.01 | 1.20E-07 | 0.00016  | 0.072    | 0.41    | NA | NA | NA | NA |
| 0.1  | 0.05  | -0.04 | 0     | 2.40E-07 | 5.20E-05 | 0.00039  | 1       | NA | NA | NA | NA |
| 0.18 | 0.08  | 0.03  | 0.04  | 2.40E-07 | 0.00059  | 0.21     | 0.033   | NA | NA | NA | NA |
| 0.2  | 0.13  | -0.05 | -0.02 | 3.30E-07 | 7.40E-07 | 0.0017   | 0.17    | NA | NA | NA | NA |
| 0.13 | 0     | 0.01  | 0.02  | 6.30E-07 | 1        | 0.69     | 0.25    | NA | NA | NA | NA |
| 0.15 | 0.04  | -0.02 | 0.03  | 7.20E-07 | 0.037    | 0.16     | 0.04    | NA | NA | NA | NA |
| 0.19 | 0.16  | -0.05 | -0.02 | 8.70E-07 | 1.30E-05 | 0.0059   | 0.27    | NA | NA | NA | NA |
| 0.23 | 0.09  | 0     | 0.06  | 1.10E-06 | 0.0035   | 1        | 0.0021  | NA | NA | NA | NA |
| 0.4  | 0.35  | -0.02 | 0.15  | 1.80E-06 | 1.20E-06 | 0.73     | 0.0039  | NA | NA | NA | NA |

|       |       |       |       |          |          |          |          |    |    |    |    |
|-------|-------|-------|-------|----------|----------|----------|----------|----|----|----|----|
| 0.34  | 0.07  | -0.02 | 0.08  | 2.20E-06 | 0.13     | 0.27     | 0.0041   | NA | NA | NA | NA |
| 0.14  | 0.03  | -0.06 | -0.02 | 3.10E-06 | 0.15     | 2.00E-05 | 0.24     | NA | NA | NA | NA |
| 0.19  | -0.01 | -0.06 | 0.01  | 3.30E-06 | 0.69     | 0.00043  | 0.78     | NA | NA | NA | NA |
| 0.54  | 0.06  | -0.17 | -0.14 | 3.80E-06 | 0.72     | 6.60E-07 | 0.025    | NA | NA | NA | NA |
| 0.56  | 0     | -0.05 | -0.04 | 4.50E-06 | 1        | 0.19     | 0.35     | NA | NA | NA | NA |
| 0.1   | 0.07  | -0.03 | 0.01  | 5.60E-06 | 0.0042   | 0.022    | 0.42     | NA | NA | NA | NA |
| 0.09  | 0.04  | -0.05 | -0.01 | 6.00E-06 | 0.015    | 4.30E-06 | 0.47     | NA | NA | NA | NA |
| 0.33  | 0.68  | -0.04 | 0.01  | 7.80E-06 | 0.00028  | 0.098    | 0.75     | NA | NA | NA | NA |
| 0.21  | 0.15  | 0.03  | 0.16  | 9.50E-06 | 0.00027  | 0.26     | 1.70E-08 | NA | NA | NA | NA |
| 0.2   | 0     | -0.02 | 0.02  | 1.20E-05 | 1        | 0.29     | 0.37     | NA | NA | NA | NA |
| 0.06  | -0.02 | -0.03 | -0.01 | 1.30E-05 | 0.065    | 0.00016  | 0.11     | NA | NA | NA | NA |
| 0.13  | 0.04  | 0     | 0.03  | 1.40E-05 | 0.14     | 0.8      | 0.044    | NA | NA | NA | NA |
| 0.37  | 0.18  | 0.02  | 0.15  | 1.70E-05 | 0.016    | 0.8      | 0.0045   | NA | NA | NA | NA |
| 0.1   | 0.13  | -0.07 | -0.05 | 1.80E-05 | 3.90E-09 | 4.80E-06 | 0.0027   | NA | NA | NA | NA |
| 0.16  | 0.02  | -0.02 | -0.01 | 1.90E-05 | 0.51     | 0.38     | 0.49     | NA | NA | NA | NA |
| 0.21  | 0.11  | -0.02 | 0.02  | 2.40E-05 | 0.0013   | 0.074    | 0.23     | NA | NA | NA | NA |
| 0.34  | 0.06  | -0.03 | -0.02 | 2.60E-05 | 0.18     | 0.49     | 0.58     | NA | NA | NA | NA |
| 0.26  | 0.08  | -0.05 | 0.01  | 2.70E-05 | 0.28     | 0.61     | 0.97     | NA | NA | NA | NA |
| -0.09 | 0.05  | 0     | -0.02 | 3.10E-05 | 0.25     | 0.97     | 0.41     | NA | NA | NA | NA |
| -0.2  | -0.08 | 0     | 0.03  | 3.20E-05 | 0.14     | 1        | 0.19     | NA | NA | NA | NA |
| 0.1   | 0.08  | -0.04 | 0     | 4.00E-05 | 0.0063   | 0.0037   | 0.91     | NA | NA | NA | NA |
| 0.25  | 0.02  | -0.03 | -0.05 | 4.70E-05 | 0.8      | 0.61     | 0.22     | NA | NA | NA | NA |
| -0.51 | -0.18 | 0.01  | 0.21  | 4.80E-05 | 0.39     | 0.88     | 2.50E-07 | NA | NA | NA | NA |
| 0.15  | 0.08  | -0.03 | 0.02  | 5.30E-05 | 0.034    | 0.04     | 0.32     | NA | NA | NA | NA |
| 0.35  | 0.17  | -0.01 | 0.06  | 5.90E-05 | 0.017    | 0.72     | 0.0054   | NA | NA | NA | NA |
| 0.13  | 0.16  | -0.01 | 0.05  | 6.50E-05 | 1.20E-07 | 0.77     | 0.015    | NA | NA | NA | NA |
| 0.09  | 0.05  | 0     | 0.04  | 7.10E-05 | 0.0069   | 1        | 0.019    | NA | NA | NA | NA |
| 0.15  | 0.13  | -0.03 | 0.03  | 7.10E-05 | 1.20E-05 | 0.047    | 0.013    | NA | NA | NA | NA |
| 0.17  | 0.11  | 0     | 0.05  | 7.50E-05 | 0.00074  | 1        | 0.023    | NA | NA | NA | NA |
| 0.25  | 0.06  | -0.02 | 0     | 7.50E-05 | 0.21     | 0.53     | 0.89     | NA | NA | NA | NA |

|       |       |       |       |          |          |          |          |    |    |    |    |
|-------|-------|-------|-------|----------|----------|----------|----------|----|----|----|----|
| 0.15  | 0.02  | -0.01 | 0.03  | 7.70E-05 | 0.76     | 0.67     | 0.16     | NA | NA | NA | NA |
| 0.17  | 0.06  | 0.03  | 0.03  | 0.00012  | 0.16     | 0.061    | 0.1      | NA | NA | NA | NA |
| 0.19  | 0.03  | -0.01 | 0     | 0.00015  | 0.6      | 0.81     | 1        | NA | NA | NA | NA |
| 0.18  | 0.06  | -0.08 | 0.02  | 0.00018  | 0.1      | 1.60E-07 | 0.45     | NA | NA | NA | NA |
| 0.34  | 0.12  | -0.07 | -0.04 | 0.00025  | 0.39     | 0.25     | 0.54     | NA | NA | NA | NA |
| 0.19  | 0.05  | -0.03 | 0.05  | 0.00026  | 0.047    | 0.15     | 0.0054   | NA | NA | NA | NA |
| 0.14  | 0.04  | -0.04 | -0.02 | 0.00027  | 0.063    | 0.0023   | 0.21     | NA | NA | NA | NA |
| -0.28 | -0.25 | -0.01 | 0.08  | 0.00027  | 0.00015  | 0.83     | 0.0022   | NA | NA | NA | NA |
| 0.14  | 0.08  | -0.02 | 0.06  | 4.00E-04 | 0.0028   | 0.2      | 0.0028   | NA | NA | NA | NA |
| -0.12 | 0     | -0.09 | -0.03 | 4.00E-04 | 1        | 9.30E-08 | 0.2      | NA | NA | NA | NA |
| 0.1   | 0.03  | -0.06 | -0.05 | 0.00046  | 0.045    | 2.30E-08 | 1.20E-05 | NA | NA | NA | NA |
| 0.4   | -0.11 | -0.03 | 0.03  | 0.00046  | 0.013    | 0.094    | 0.1      | NA | NA | NA | NA |
| 0.42  | 0.09  | -0.05 | 0.05  | 6.00E-04 | 0.23     | 0.059    | 0.12     | NA | NA | NA | NA |
| 0.27  | 0.06  | 0.03  | 0.05  | 0.00061  | 0.027    | 0.15     | 0.038    | NA | NA | NA | NA |
| 0.06  | -0.01 | -0.03 | 0.02  | 0.00067  | 0.31     | 0.01     | 0.088    | NA | NA | NA | NA |
| 0.08  | 0.07  | -0.02 | -0.04 | 7.00E-04 | 9.10E-05 | 0.18     | 9.00E-04 | NA | NA | NA | NA |
| 0.13  | 0.01  | -0.02 | -0.03 | 0.00075  | 0.83     | 0.42     | 0.14     | NA | NA | NA | NA |
| 0.2   | 0.11  | -0.02 | 0.05  | 0.00079  | 0.015    | 0.23     | 0.003    | NA | NA | NA | NA |
| 0.13  | 0.02  | -0.02 | 0.02  | 0.00095  | 0.61     | 0.23     | 0.25     | NA | NA | NA | NA |
| 0.19  | 0.05  | 0.13  | 0     | 0.0011   | 0.19     | 8.30E-05 | 0.98     | NA | NA | NA | NA |
| 0.16  | 0.02  | -0.04 | 0.03  | 0.0011   | 0.66     | 0.019    | 0.16     | NA | NA | NA | NA |
| 0.24  | 0.12  | -0.08 | 0.02  | 0.0012   | 0.011    | 0.0017   | 0.49     | NA | NA | NA | NA |
| 0.12  | 0.12  | 0.03  | 0.07  | 0.0013   | 2.00E-05 | 0.048    | 6.30E-05 | NA | NA | NA | NA |
| 0.13  | -0.01 | -0.05 | -0.01 | 0.0013   | 0.77     | 0.0017   | 0.72     | NA | NA | NA | NA |
| 0.06  | 0.02  | 0.01  | 0.04  | 0.0014   | 0.22     | 0.74     | 0.0096   | NA | NA | NA | NA |
| 0.05  | 0.08  | -0.02 | -0.01 | 0.0014   | 8.40E-08 | 0.033    | 0.48     | NA | NA | NA | NA |
| 0.2   | 0.03  | -0.07 | 0.05  | 0.0015   | 1        | 0.065    | 0.2      | NA | NA | NA | NA |
| 0.12  | 0.07  | -0.01 | 0.02  | 0.0015   | 0.035    | 0.66     | 0.44     | NA | NA | NA | NA |
| -0.35 | -0.06 | -0.26 | -0.17 | 0.0017   | 0.62     | 7.10E-08 | 0.00011  | NA | NA | NA | NA |
| 0.27  | 0.15  | -0.04 | 0.02  | 0.0017   | 0.0014   | 0.11     | 0.37     | NA | NA | NA | NA |

|       |       |       |       |        |          |          |          |    |    |    |    |
|-------|-------|-------|-------|--------|----------|----------|----------|----|----|----|----|
| 0.14  | 0.1   | -0.03 | 0.01  | 0.0018 | 0.0019   | 0.11     | 0.71     | NA | NA | NA | NA |
| 0.15  | 0.22  | -0.03 | 0.07  | 0.0023 | 1.20E-06 | 0.13     | 0.013    | NA | NA | NA | NA |
| 0.17  | -0.05 | -0.03 | 0     | 0.0023 | 0.15     | 0.021    | 1        | NA | NA | NA | NA |
| 0.59  | 0.12  | 0.09  | -0.04 | 0.0025 | 0.3      | 0.079    | 0.23     | NA | NA | NA | NA |
| 0.08  | 0.01  | -0.06 | 0     | 0.0025 | 0.51     | 4.70E-05 | 0.97     | NA | NA | NA | NA |
| 0.07  | 0     | -0.05 | 0.01  | 0.0026 | 0.86     | 1.60E-05 | 0.38     | NA | NA | NA | NA |
| 0.2   | 0.03  | -0.02 | 0.11  | 0.003  | 0.62     | 0.32     | 3.60E-05 | NA | NA | NA | NA |
| 0.19  | 0     | -0.05 | 0.02  | 0.0033 | 1        | 0.0097   | 0.52     | NA | NA | NA | NA |
| -0.19 | -0.2  | 0.05  | 0.1   | 0.0037 | 0.012    | 0.15     | 0.0057   | NA | NA | NA | NA |
| 0.06  | 0.02  | -0.03 | -0.01 | 0.0038 | 0.2      | 0.036    | 0.45     | NA | NA | NA | NA |
| 0.17  | 0.04  | 0.03  | 0.04  | 0.0038 | 0.33     | 0.17     | 0.026    | NA | NA | NA | NA |
| -0.14 | -0.01 | -0.06 | 0.1   | 0.0039 | 0.97     | 0.011    | 0.0038   | NA | NA | NA | NA |
| 0.09  | 0.04  | -0.02 | -0.04 | 0.0044 | 0.1      | 0.15     | 0.0064   | NA | NA | NA | NA |
| 0.13  | 0.01  | -0.05 | 0.03  | 0.0049 | 0.92     | 0.016    | 0.45     | NA | NA | NA | NA |
| 0.07  | 0.02  | -0.05 | -0.01 | 0.0051 | 0.23     | 1.60E-06 | 0.65     | NA | NA | NA | NA |
| 0.91  | 0     | -0.13 | -0.07 | 0.006  | 1        | 0.00037  | 0.099    | NA | NA | NA | NA |
| 0.08  | -0.02 | -0.02 | 0     | 0.0064 | 0.15     | 0.24     | 0.94     | NA | NA | NA | NA |
| -0.46 | -0.47 | -0.03 | 0.03  | 0.0066 | 0.0025   | 0.61     | 0.61     | NA | NA | NA | NA |
| 0.29  | 0.06  | -0.04 | 0.02  | 0.0067 | 0.48     | 0.18     | 0.62     | NA | NA | NA | NA |
| 0.11  | 0.07  | -0.05 | -0.03 | 0.0071 | 0.0094   | 0.00038  | 0.06     | NA | NA | NA | NA |
| -0.12 | -0.11 | -0.06 | -0.06 | 0.0081 | 0.009    | 0.087    | 0.062    | NA | NA | NA | NA |
| 0.16  | 0.15  | -0.04 | 0.08  | 0.0088 | 0.093    | 0.064    | 0.0057   | NA | NA | NA | NA |
| -0.05 | -0.01 | -0.02 | -0.02 | 0.0089 | 0.55     | 0.074    | 0.11     | NA | NA | NA | NA |
| -0.11 | -0.03 | -0.02 | 0.05  | 0.0089 | 0.55     | 0.23     | 0.011    | NA | NA | NA | NA |
| 0.22  | 0.04  | 0.02  | 0.02  | 0.0095 | 0.24     | 0.42     | 0.6      | NA | NA | NA | NA |
| 0.08  | 0.05  | -0.06 | 0     | 0.0097 | 0.057    | 0.006    | 0.99     | NA | NA | NA | NA |
| 0.09  | 0.03  | -0.01 | -0.03 | 0.011  | 0.41     | 0.47     | 0.07     | NA | NA | NA | NA |
| 0.23  | -0.02 | -0.05 | -0.06 | 0.011  | 0.9      | 0.3      | 0.021    | NA | NA | NA | NA |
| 0.08  | 0.13  | -0.06 | -0.05 | 0.011  | 9.40E-06 | 0.052    | 0.093    | NA | NA | NA | NA |
| 0.19  | 0.05  | -0.02 | -0.01 | 0.011  | 0.61     | 0.17     | 0.75     | NA | NA | NA | NA |



|       |       |       |       |       |          |          |          |    |    |    |    |
|-------|-------|-------|-------|-------|----------|----------|----------|----|----|----|----|
| 0.09  | 0.06  | 0     | 0.06  | 0.012 | 0.059    | 1        | 0.0042   | NA | NA | NA | NA |
| -0.53 | -0.56 | 0     | 0.02  | 0.012 | 4.80E-05 | 1        | 0.68     | NA | NA | NA | NA |
| 0.12  | 0.08  | -0.07 | -0.07 | 0.012 | 0.0086   | 0.011    | 0.0015   | NA | NA | NA | NA |
| 0.05  | 0.05  | -0.04 | 0.02  | 0.012 | 0.00019  | 5.00E-07 | 0.093    | NA | NA | NA | NA |
| 0.16  | 0.07  | -0.01 | -0.02 | 0.012 | 0.19     | 0.91     | 0.6      | NA | NA | NA | NA |
| 0.25  | -0.03 | -0.11 | -0.06 | 0.013 | 0.93     | 5.40E-06 | 0.037    | NA | NA | NA | NA |
| 0.75  | 0.75  | -0.03 | 0.03  | 0.015 | 0.0024   | 0.37     | 0.48     | NA | NA | NA | NA |
| 0.09  | 0.07  | -0.03 | 0.04  | 0.015 | 0.052    | 0.087    | 0.024    | NA | NA | NA | NA |
| 0.29  | 0.01  | -0.07 | 0.05  | 0.016 | 1        | 0.0022   | 0.066    | NA | NA | NA | NA |
| 0.3   | 0.33  | -0.04 | 0.11  | 0.016 | 0.79     | 0.49     | 0.056    | NA | NA | NA | NA |
| 0.07  | 0.01  | -0.06 | 0     | 0.017 | 0.75     | 4.00E-05 | 0.97     | NA | NA | NA | NA |
| 0.6   | 0     | 0     | 0.11  | 0.017 | 1        | 1        | 0.005    | NA | NA | NA | NA |
| 0.04  | 0.05  | 0     | 0.06  | 0.018 | 0.0032   | 0.98     | 9.40E-06 | NA | NA | NA | NA |
| 0.67  | 0.39  | 0.11  | 0.23  | 0.018 | 0.095    | 0.57     | 0.21     | NA | NA | NA | NA |
| 0.1   | 0     | -0.03 | 0.02  | 0.018 | 0.96     | 0.069    | 0.11     | NA | NA | NA | NA |
| -0.18 | -0.09 | -0.09 | -0.06 | 0.019 | 0.34     | 0.011    | 0.092    | NA | NA | NA | NA |
| 0.06  | 0.15  | -0.04 | -0.03 | 0.019 | 7.90E-08 | 0.085    | 0.077    | NA | NA | NA | NA |
| 0.06  | -0.03 | -0.04 | 0.03  | 0.019 | 0.13     | 9.50E-05 | 0.0065   | NA | NA | NA | NA |
| 0.18  | -0.01 | -0.02 | -0.02 | 0.019 | 1        | 0.44     | 0.55     | NA | NA | NA | NA |
| 0.13  | 0.11  | -0.05 | 0.03  | 0.02  | 0.024    | 0.0087   | 0.13     | NA | NA | NA | NA |
| 0.23  | 0.01  | -0.04 | 0.07  | 0.02  | 1        | 0.13     | 0.0022   | NA | NA | NA | NA |
| 0.02  | 0.03  | -0.01 | 0     | 0.02  | 0.00022  | 0.39     | 0.8      | NA | NA | NA | NA |
| 0.23  | 0.04  | -0.03 | 0     | 0.021 | 0.54     | 0.24     | 1        | NA | NA | NA | NA |
| 0.09  | 0.11  | 0.01  | 0.04  | 0.021 | 0.0042   | 0.74     | 0.058    | NA | NA | NA | NA |
| 0.12  | 0.01  | -0.04 | 0.02  | 0.021 | 0.56     | 0.022    | 0.4      | NA | NA | NA | NA |
| 0.26  | -0.04 | 0.02  | 0.03  | 0.022 | 0.64     | 0.73     | 0.53     | NA | NA | NA | NA |
| 0.15  | 0.07  | -0.08 | 0.02  | 0.022 | 0.085    | 0.00029  | 0.55     | NA | NA | NA | NA |
| 0.06  | 0.04  | -0.03 | -0.01 | 0.023 | 0.08     | 0.034    | 0.5      | NA | NA | NA | NA |
| 0.07  | 0.03  | -0.05 | -0.03 | 0.024 | 0.16     | 0.017    | 0.11     | NA | NA | NA | NA |
| 0.13  | 0.09  | -0.05 | 0.02  | 0.025 | 0.0071   | 0.0052   | 0.25     | NA | NA | NA | NA |

|       |       |       |       |       |          |          |          |    |    |    |    |
|-------|-------|-------|-------|-------|----------|----------|----------|----|----|----|----|
| 0.08  | -0.03 | -0.03 | -0.01 | 0.025 | 0.16     | 0.11     | 0.46     | NA | NA | NA | NA |
| 0.04  | 0.03  | -0.01 | 0.01  | 0.025 | 0.04     | 0.33     | 0.39     | NA | NA | NA | NA |
| -0.08 | -0.08 | -0.03 | 0     | 0.025 | 0.00038  | 0.062    | 0.86     | NA | NA | NA | NA |
| 0.13  | 0.1   | -0.05 | -0.07 | 0.026 | 0.12     | 0.17     | 0.018    | NA | NA | NA | NA |
| 0.05  | -0.01 | -0.03 | 0.01  | 0.027 | 0.75     | 0.0033   | 0.28     | NA | NA | NA | NA |
| 0.16  | 0.22  | -0.02 | 0.1   | 0.027 | 0.0049   | 0.65     | 0.055    | NA | NA | NA | NA |
| -0.06 | -0.02 | 0     | 0.09  | 0.027 | 0.67     | 0.84     | 4.70E-08 | NA | NA | NA | NA |
| 0.14  | 0.09  | 0.03  | 0.06  | 0.03  | 0.14     | 0.2      | 0.045    | NA | NA | NA | NA |
| -0.13 | -0.06 | 0     | 0.01  | 0.031 | 0.33     | 1        | 0.6      | NA | NA | NA | NA |
| 0.12  | 0.11  | -0.11 | -0.02 | 0.032 | 2.90E-05 | 4.50E-09 | 0.48     | NA | NA | NA | NA |
| 0.11  | 0.17  | -0.14 | -0.08 | 0.034 | 0.0017   | 2.30E-09 | 0.0018   | NA | NA | NA | NA |
| 0.24  | 0.06  | -0.04 | 0.03  | 0.034 | 0.34     | 0.14     | 0.36     | NA | NA | NA | NA |
| 0.07  | 0.11  | -0.04 | -0.01 | 0.034 | 3.00E-05 | 0.00071  | 0.58     | NA | NA | NA | NA |
| 0.44  | -0.06 | -0.03 | 0.06  | 0.035 | 0.9      | 0.074    | 0.013    | NA | NA | NA | NA |
| 0.05  | 0.02  | 0.02  | 0.01  | 0.036 | 0.58     | 0.5      | 0.96     | NA | NA | NA | NA |
| 0.08  | 0.01  | -0.04 | 0.03  | 0.036 | 0.75     | 0.017    | 0.27     | NA | NA | NA | NA |
| -0.08 | 0.01  | -0.05 | -0.02 | 0.036 | 0.87     | 0.0055   | 0.57     | NA | NA | NA | NA |
| 0.08  | -0.03 | -0.03 | 0.07  | 0.036 | 0.29     | 0.075    | 0.00021  | NA | NA | NA | NA |
| -0.05 | -0.04 | -0.02 | 0     | 0.037 | 0.16     | 0.3      | 0.98     | NA | NA | NA | NA |
| 0.37  | 0.24  | -0.04 | -0.06 | 0.037 | 0.32     | 0.41     | 0.42     | NA | NA | NA | NA |
| 0.06  | -0.02 | -0.04 | 0     | 0.038 | 0.24     | 2.40E-05 | 0.74     | NA | NA | NA | NA |
| 0.05  | 0.06  | -0.04 | 0.02  | 0.039 | 7.10E-05 | 0.0027   | 0.073    | NA | NA | NA | NA |
| 0.1   | 0.15  | 0     | 0.03  | 0.042 | 0.00034  | 1        | 0.13     | NA | NA | NA | NA |
| 0.07  | 0.04  | -0.05 | 0     | 0.042 | 0.16     | 0.0038   | 0.97     | NA | NA | NA | NA |
| 0.09  | 0.06  | -0.05 | -0.04 | 0.042 | 0.1      | 0.01     | 0.016    | NA | NA | NA | NA |
| 0.08  | 0.01  | -0.06 | 0.03  | 0.042 | 0.96     | 0.00024  | 0.15     | NA | NA | NA | NA |
| 0.15  | 0     | 0.01  | 0.16  | 0.043 | 1        | 0.84     | 5.60E-05 | NA | NA | NA | NA |
| 0.09  | 0.11  | 0.01  | 0.05  | 0.046 | 0.0019   | 0.69     | 0.0093   | NA | NA | NA | NA |
| -0.75 | -0.42 | -0.06 | -0.01 | 0.047 | 0.15     | 0.22     | 1        | NA | NA | NA | NA |
| 0.05  | 0.06  | -0.05 | 0.01  | 0.047 | 0.072    | 0.0014   | 0.73     | NA | NA | NA | NA |

|       |       |       |       |       |          |          |          |    |    |    |    |
|-------|-------|-------|-------|-------|----------|----------|----------|----|----|----|----|
| 0.16  | 0.05  | -0.06 | 0.11  | 0.048 | 0.69     | 0.0088   | 9.50E-06 | NA | NA | NA | NA |
| -0.09 | 0.01  | -0.06 | 0     | 0.05  | 0.86     | 0.00043  | 1        | NA | NA | NA | NA |
| 0.08  | 0.05  | -0.01 | 0.06  | 0.051 | 0.0052   | 0.63     | 8.00E-04 | NA | NA | NA | NA |
| 0.06  | 0.02  | -0.04 | -0.03 | 0.053 | 0.63     | 0.0057   | 0.062    | NA | NA | NA | NA |
| 0.06  | -0.01 | -0.08 | -0.03 | 0.053 | 0.66     | 3.50E-06 | 0.12     | NA | NA | NA | NA |
| 0.31  | 0.11  | -0.01 | 0.03  | 0.054 | 0.03     | 0.84     | 0.43     | NA | NA | NA | NA |
| 0.08  | 0.09  | -0.07 | -0.05 | 0.055 | 0.00064  | 0.0012   | 0.036    | NA | NA | NA | NA |
| 0.08  | 0     | -0.06 | -0.05 | 0.058 | 1        | 4.00E-05 | 0.0048   | NA | NA | NA | NA |
| 0.09  | 0.04  | -0.02 | -0.02 | 0.059 | 0.32     | 0.37     | 0.43     | NA | NA | NA | NA |
| 0.05  | 0     | -0.05 | -0.03 | 0.062 | 1        | 2.60E-06 | 0.0045   | NA | NA | NA | NA |
| 0.31  | 0.24  | -0.04 | 0.31  | 0.062 | 0.023    | 0.51     | 0.031    | NA | NA | NA | NA |
| 0.04  | 0.04  | -0.03 | 0.04  | 0.063 | 0.0024   | 0.014    | 0.00078  | NA | NA | NA | NA |
| 0.07  | 0.02  | -0.08 | -0.02 | 0.064 | 0.47     | 5.80E-05 | 0.41     | NA | NA | NA | NA |
| -0.07 | 0.03  | -0.07 | -0.02 | 0.064 | 0.64     | 0.00045  | 0.45     | NA | NA | NA | NA |
| 0.03  | 0.03  | -0.1  | -0.04 | 0.068 | 0.091    | 2.00E-08 | 0.028    | NA | NA | NA | NA |
| 0.17  | 0.08  | -0.03 | 0.03  | 0.068 | 0.33     | 0.13     | 0.29     | NA | NA | NA | NA |
| 0.1   | 0.16  | 0     | 0.01  | 0.071 | 0.035    | 0.98     | 0.96     | NA | NA | NA | NA |
| 0.26  | 0.11  | -0.06 | -0.03 | 0.073 | 0.12     | 0.00037  | 0.044    | NA | NA | NA | NA |
| 0.05  | 0.04  | -0.02 | 0.05  | 0.073 | 0.21     | 0.25     | 0.01     | NA | NA | NA | NA |
| 0.1   | 0.14  | 0     | 0.05  | 0.073 | 3.90E-05 | 0.9      | 0.012    | NA | NA | NA | NA |
| -0.15 | -0.19 | 0.01  | 0.06  | 0.073 | 0.0044   | 0.73     | 0.034    | NA | NA | NA | NA |
| 0.38  | 0.23  | 0.12  | 0.03  | 0.076 | 0.0085   | 0.26     | 0.9      | NA | NA | NA | NA |
| 0.07  | 0.01  | -0.08 | -0.01 | 0.078 | 0.88     | 1.80E-05 | 0.56     | NA | NA | NA | NA |
| 0.27  | 0.16  | -0.02 | 0.01  | 0.08  | 0.22     | 0.66     | 0.75     | NA | NA | NA | NA |
| -0.1  | 0.06  | -0.04 | 0.03  | 0.083 | 0.19     | 0.19     | 0.36     | NA | NA | NA | NA |
| -0.08 | NA    | 0.05  | 0.03  | 0.084 | NA       | 0.18     | 0.35     | NA | NA | NA | NA |
| 0.32  | NA    | -0.08 | 0.08  | 0.088 | NA       | 0.088    | 0.21     | NA | NA | NA | NA |
| 0.03  | 0.05  | 0.03  | 0.02  | 0.089 | 0.0088   | 0.19     | 0.13     | NA | NA | NA | NA |
| 0.05  | 0.17  | -0.07 | -0.05 | 0.09  | 0.14     | 0.002    | 0.043    | NA | NA | NA | NA |
| 0.07  | -0.03 | 0.01  | 0.03  | 0.091 | 0.35     | 0.62     | 0.23     | NA | NA | NA | NA |

|       |       |       |       |       |         |          |          |    |    |    |    |
|-------|-------|-------|-------|-------|---------|----------|----------|----|----|----|----|
| -0.13 | -0.21 | -0.02 | 0     | 0.091 | 0.00011 | 0.24     | 1        | NA | NA | NA | NA |
| 0.06  | 0.04  | -0.03 | 0.02  | 0.094 | 0.093   | 0.034    | 0.24     | NA | NA | NA | NA |
| 0.04  | 0.03  | -0.04 | 0     | 0.095 | 0.12    | 0.0042   | 0.77     | NA | NA | NA | NA |
| 0.1   | 0.03  | 0     | 0.05  | 0.098 | 0.43    | 1        | 0.00032  | NA | NA | NA | NA |
| -0.08 | -0.11 | -0.08 | -0.1  | 0.098 | 0.018   | 0.014    | 3.00E-04 | NA | NA | NA | NA |
| -0.13 | 0.13  | -0.12 | 0.21  | 0.1   | 0.44    | 0.3      | 0.042    | NA | NA | NA | NA |
| 0.08  | 0.03  | -0.01 | 0.05  | 0.1   | 0.45    | 0.46     | 0.0076   | NA | NA | NA | NA |
| 0.05  | -0.03 | -0.06 | 0.01  | 0.1   | 0.12    | 3.20E-06 | 0.56     | NA | NA | NA | NA |
| 0.06  | 0.09  | -0.04 | 0.01  | 0.1   | 0.012   | 0.011    | 0.55     | NA | NA | NA | NA |
| -0.07 | 0.06  | -0.03 | -0.01 | 0.1   | 0.24    | 0.23     | 0.52     | NA | NA | NA | NA |
| 0.05  | 0.03  | -0.02 | 0.04  | 0.1   | 0.33    | 0.041    | 0.0074   | NA | NA | NA | NA |
| -0.13 | -0.09 | -0.02 | 0.02  | 0.1   | 0.091   | 0.1      | 0.23     | NA | NA | NA | NA |
| 0.37  | -0.02 | 0.03  | 0.01  | 0.11  | 1       | 0.63     | 1        | NA | NA | NA | NA |
| 0.09  | -0.04 | -0.05 | -0.03 | 0.11  | 0.3     | 0.0036   | 0.21     | NA | NA | NA | NA |
| 0.03  | 0.03  | -0.04 | 0.03  | 0.11  | 0.058   | 3.30E-05 | 0.011    | NA | NA | NA | NA |
| -0.07 | NA    | -0.04 | 0.06  | 0.11  | NA      | 0.21     | 0.14     | NA | NA | NA | NA |
| -0.15 | -0.06 | -0.01 | 0.02  | 0.11  | 0.61    | 0.82     | 0.51     | NA | NA | NA | NA |
| 0.13  | 0     | -0.04 | 0.06  | 0.11  | 1       | 0.18     | 0.16     | NA | NA | NA | NA |
| 0.06  | 0.05  | -0.06 | 0.06  | 0.12  | 0.056   | 2.10E-05 | 0.0016   | NA | NA | NA | NA |
| -0.13 | -0.06 | -0.07 | 0.06  | 0.13  | 0.5     | 0.0068   | 0.041    | NA | NA | NA | NA |
| 0.08  | -0.03 | 0.03  | 0.04  | 0.13  | 0.49    | 0.2      | 0.059    | NA | NA | NA | NA |
| 0.11  | 0.18  | -0.03 | 0.14  | 0.13  | 0.0081  | 0.57     | 0.0035   | NA | NA | NA | NA |
| 0.09  | 0.01  | -0.12 | -0.09 | 0.13  | 0.97    | 2.20E-06 | 9.90E-05 | NA | NA | NA | NA |
| 0.07  | 0     | 0.01  | -0.02 | 0.13  | 1       | 0.83     | 0.29     | NA | NA | NA | NA |
| 0.1   | -0.06 | 0.01  | 0.05  | 0.13  | 0.1     | 0.74     | 0.0019   | NA | NA | NA | NA |
| 0.06  | 0.03  | -0.07 | -0.03 | 0.14  | 0.37    | 2.10E-05 | 0.066    | NA | NA | NA | NA |
| 0.05  | 0.02  | 0     | -0.01 | 0.14  | 0.55    | 0.93     | 0.51     | NA | NA | NA | NA |
| 0.08  | 0.01  | -0.01 | 0.02  | 0.14  | 0.94    | 0.64     | 0.49     | NA | NA | NA | NA |
| -0.09 | 0.07  | 0.02  | 0.04  | 0.14  | 0.45    | 0.53     | 0.057    | NA | NA | NA | NA |
| -0.21 | 0.05  | -0.11 | -0.13 | 0.14  | 0.82    | 0.018    | 0.0051   | NA | NA | NA | NA |

|       |       |       |       |      |          |          |         |    |    |    |    |
|-------|-------|-------|-------|------|----------|----------|---------|----|----|----|----|
| 0.17  | 0.11  | -0.05 | 0.07  | 0.14 | 0.28     | 0.079    | 0.037   | NA | NA | NA | NA |
| 0.14  | 0.15  | -0.04 | 0.04  | 0.15 | 0.00091  | 0.027    | 0.14    | NA | NA | NA | NA |
| 0.04  | 0.1   | -0.05 | 0.03  | 0.15 | 6.50E-08 | 3.80E-05 | 0.03    | NA | NA | NA | NA |
| 0.04  | 0.1   | -0.04 | 0.04  | 0.15 | 0.00097  | 0.011    | 0.17    | NA | NA | NA | NA |
| 0.03  | 0.04  | -0.04 | -0.04 | 0.15 | 0.019    | 0.0064   | 0.00073 | NA | NA | NA | NA |
| 0.05  | 0.02  | -0.09 | -0.01 | 0.15 | 0.34     | 1.30E-09 | 0.75    | NA | NA | NA | NA |
| 0.05  | -0.02 | -0.05 | -0.02 | 0.16 | 0.4      | 0.0088   | 0.39    | NA | NA | NA | NA |
| -0.21 | -0.22 | -0.03 | -0.08 | 0.16 | 0.17     | 0.76     | 0.044   | NA | NA | NA | NA |
| 0.04  | 0.01  | -0.02 | 0.03  | 0.16 | 0.66     | 0.043    | 0.0051  | NA | NA | NA | NA |
| 0.33  | -0.11 | -0.03 | -0.05 | 0.16 | 0.1      | 0.57     | 0.11    | NA | NA | NA | NA |
| 0.09  | 0     | -0.01 | 0.05  | 0.16 | 1        | 0.73     | 0.098   | NA | NA | NA | NA |
| 0.05  | 0.06  | 0.02  | 0.04  | 0.16 | 0.034    | 0.43     | 0.047   | NA | NA | NA | NA |
| 0.24  | 0.13  | -0.05 | 0.01  | 0.16 | 0.26     | 0.081    | 0.82    | NA | NA | NA | NA |
| -0.03 | 0     | 0     | -0.01 | 0.16 | 0.97     | 1        | 0.71    | NA | NA | NA | NA |
| 0.14  | 0.16  | -0.01 | -0.04 | 0.16 | 0.064    | 0.77     | 0.069   | NA | NA | NA | NA |
| 0.12  | 0.02  | -0.07 | -0.01 | 0.17 | 0.76     | 7.30E-07 | 0.52    | NA | NA | NA | NA |
| 0.05  | 0.15  | -0.02 | 0.03  | 0.17 | 8.00E-06 | 0.047    | 0.016   | NA | NA | NA | NA |
| 0.18  | 0.01  | -0.06 | -0.02 | 0.17 | 1        | 0.0061   | 0.5     | NA | NA | NA | NA |
| 0.04  | 0.02  | -0.02 | 0.01  | 0.17 | 0.32     | 0.16     | 0.72    | NA | NA | NA | NA |
| 0.23  | 0.1   | -0.07 | 0.03  | 0.17 | 0.48     | 0.012    | 0.37    | NA | NA | NA | NA |
| 0.27  | 0.77  | -0.07 | -0.03 | 0.17 | 3.50E-05 | 0.0056   | 0.37    | NA | NA | NA | NA |
| 0.04  | 0.12  | -0.02 | 0.04  | 0.17 | 0.00015  | 0.28     | 0.029   | NA | NA | NA | NA |
| 0.11  | 0.06  | -0.03 | -0.02 | 0.18 | 0.26     | 0.31     | 0.49    | NA | NA | NA | NA |
| -0.05 | 0.2   | -0.06 | -0.02 | 0.18 | 1.00E-05 | 1.20E-05 | 0.21    | NA | NA | NA | NA |
| 0.13  | -0.04 | 0.02  | -0.04 | 0.18 | 0.52     | 0.69     | 0.3     | NA | NA | NA | NA |
| 0.04  | 0.04  | -0.04 | -0.01 | 0.18 | 0.016    | 0.063    | 0.61    | NA | NA | NA | NA |
| 0.18  | 0.83  | -0.09 | -0.05 | 0.19 | 0.00098  | 0.036    | 0.31    | NA | NA | NA | NA |
| 0.06  | 0.01  | -0.04 | 0.01  | 0.19 | 0.89     | 0.069    | 0.75    | NA | NA | NA | NA |
| -0.04 | 0.07  | -0.05 | 0.03  | 0.2  | 0.024    | 0.00022  | 0.17    | NA | NA | NA | NA |
| 0.22  | 0.19  | -0.06 | -0.08 | 0.2  | 0.29     | 0.16     | 0.16    | NA | NA | NA | NA |

|       |       |       |       |      |          |          |          |    |    |    |    |
|-------|-------|-------|-------|------|----------|----------|----------|----|----|----|----|
| -0.21 | -0.26 | 0.05  | -0.02 | 0.2  | 0.015    | 0.68     | 0.96     | NA | NA | NA | NA |
| 0.11  | -0.01 | -0.05 | -0.07 | 0.2  | 1        | 0.061    | 0.0024   | NA | NA | NA | NA |
| 0.09  | 0.06  | -0.08 | 0.03  | 0.21 | 0.8      | 1.00E-04 | 0.29     | NA | NA | NA | NA |
| 0.16  | 0.14  | -0.02 | 0.06  | 0.21 | 0.12     | 0.37     | 0.0043   | NA | NA | NA | NA |
| -0.05 | -0.03 | -0.03 | 0     | 0.21 | 0.31     | 0.16     | 1        | NA | NA | NA | NA |
| 0.05  | 0.01  | -0.06 | 0     | 0.21 | 0.66     | 0.0015   | 1        | NA | NA | NA | NA |
| 0.14  | 0.07  | 0.06  | 0.09  | 0.22 | 1        | 0.079    | 0.0063   | NA | NA | NA | NA |
| 0.11  | 0.07  | 0.04  | 0.13  | 0.22 | 0.38     | 0.44     | 0.0069   | NA | NA | NA | NA |
| 0.15  | 0.14  | -0.1  | -0.02 | 0.22 | 0.0046   | 3.50E-09 | 0.41     | NA | NA | NA | NA |
| 0.04  | 0.01  | -0.05 | -0.02 | 0.22 | 0.97     | 0.026    | 0.49     | NA | NA | NA | NA |
| 0.11  | 0.06  | -0.05 | 0     | 0.22 | 0.21     | 0.036    | 0.88     | NA | NA | NA | NA |
| -0.07 | -0.05 | 0.08  | 0.14  | 0.22 | 0.065    | 5.00E-04 | 1.40E-07 | NA | NA | NA | NA |
| 0.06  | 0.12  | -0.11 | -0.07 | 0.22 | 0.043    | 3.70E-07 | 0.018    | NA | NA | NA | NA |
| 0.03  | 0.06  | -0.06 | -0.02 | 0.22 | 0.0062   | 4.50E-06 | 0.086    | NA | NA | NA | NA |
| -0.06 | -0.01 | -0.11 | -0.04 | 0.22 | 0.87     | 1.90E-07 | 0.089    | NA | NA | NA | NA |
| 0.09  | 0.15  | -0.02 | 0.02  | 0.23 | 0.035    | 0.43     | 0.39     | NA | NA | NA | NA |
| 0.11  | 0.09  | 0     | 0     | 0.23 | 0.025    | 0.96     | 0.98     | NA | NA | NA | NA |
| 0.1   | 0.08  | 0.04  | 0.03  | 0.23 | 0.13     | 0.21     | 0.24     | NA | NA | NA | NA |
| 0.03  | -0.01 | -0.01 | 0.01  | 0.23 | 0.44     | 0.35     | 0.13     | NA | NA | NA | NA |
| 0.92  | 0.92  | -0.08 | 0.36  | 0.23 | 0.015    | 0.66     | 0.0078   | NA | NA | NA | NA |
| 0.07  | 0.22  | -0.06 | 0     | 0.23 | 1.00E-04 | 0.0042   | 0.95     | NA | NA | NA | NA |
| 0.1   | 0.04  | -0.01 | -0.02 | 0.24 | 0.19     | 0.71     | 0.26     | NA | NA | NA | NA |
| 0.03  | 0     | -0.06 | 0     | 0.24 | 1        | 1.60E-07 | 0.89     | NA | NA | NA | NA |
| -0.05 | 0.08  | 0     | 0.07  | 0.24 | 0.1      | 0.91     | 0.0027   | NA | NA | NA | NA |
| 0.05  | 0.17  | 0.04  | 0.07  | 0.24 | 0.00012  | 0.26     | 0.04     | NA | NA | NA | NA |
| -0.06 | 0.16  | 0     | -0.02 | 0.24 | 0.038    | 1        | 0.68     | NA | NA | NA | NA |
| 0.03  | 0.02  | 0.01  | 0     | 0.24 | 0.45     | 0.69     | 0.87     | NA | NA | NA | NA |
| -0.09 | 0.09  | -0.15 | -0.2  | 0.24 | 0.29     | 0.067    | 0.018    | NA | NA | NA | NA |
| 0.07  | 0.02  | -0.07 | -0.01 | 0.24 | 0.67     | 1.10E-05 | 0.71     | NA | NA | NA | NA |
| 0.03  | 0.04  | -0.02 | 0.03  | 0.25 | 0.083    | 0.075    | 0.012    | NA | NA | NA | NA |

|       |       |       |       |      |         |          |          |    |    |    |    |
|-------|-------|-------|-------|------|---------|----------|----------|----|----|----|----|
| 0.5   | 0.17  | 0.25  | 0.23  | 0.25 | 0.9     | 0.047    | 0.22     | NA | NA | NA | NA |
| 0.18  | 0.09  | -0.04 | 0.14  | 0.25 | 0.61    | 0.26     | 0.019    | NA | NA | NA | NA |
| 0.08  | 0.16  | -0.03 | -0.03 | 0.25 | 0.006   | 0.19     | 0.25     | NA | NA | NA | NA |
| -0.03 | -0.04 | -0.09 | -0.06 | 0.26 | 0.12    | 0.0015   | 0.0069   | NA | NA | NA | NA |
| 0.05  | 0.01  | -0.05 | -0.01 | 0.26 | 0.78    | 0.00063  | 0.48     | NA | NA | NA | NA |
| -0.04 | -0.02 | -0.04 | -0.01 | 0.26 | 0.47    | 0.0072   | 0.46     | NA | NA | NA | NA |
| 0.11  | 0.05  | 0.03  | 0.03  | 0.26 | 0.59    | 0.47     | 0.39     | NA | NA | NA | NA |
| 0.19  | 0.04  | -0.06 | -0.06 | 0.27 | 0.85    | 0.24     | 0.25     | NA | NA | NA | NA |
| 0.1   | 0.94  | 0.05  | 0.02  | 0.27 | 0.11    | 0.51     | 0.76     | NA | NA | NA | NA |
| -0.05 | -0.09 | -0.05 | -0.04 | 0.27 | 0.00014 | 0.066    | 0.12     | NA | NA | NA | NA |
| -0.08 | -0.04 | -0.04 | 0.04  | 0.28 | 0.64    | 0.27     | 0.33     | NA | NA | NA | NA |
| -0.06 | -0.06 | -0.02 | 0.06  | 0.28 | 0.085   | 0.32     | 0.0056   | NA | NA | NA | NA |
| -0.03 | -0.01 | -0.01 | 0     | 0.28 | 0.85    | 0.32     | 0.96     | NA | NA | NA | NA |
| 0.03  | 0.05  | -0.04 | 0.02  | 0.28 | 0.005   | 3.10E-05 | 0.16     | NA | NA | NA | NA |
| 0.05  | 0.01  | -0.06 | 0.02  | 0.28 | 0.85    | 0.00013  | 0.23     | NA | NA | NA | NA |
| 0.08  | 0.04  | -0.02 | 0.05  | 0.28 | 0.28    | 0.36     | 0.029    | NA | NA | NA | NA |
| 0.05  | 0.01  | -0.04 | 0.02  | 0.29 | 0.95    | 0.017    | 0.47     | NA | NA | NA | NA |
| 0.05  | 0.08  | -0.03 | -0.03 | 0.29 | 0.016   | 0.1      | 0.11     | NA | NA | NA | NA |
| 0.06  | 0.07  | 0     | 0.07  | 0.29 | 0.2     | 0.96     | 0.0094   | NA | NA | NA | NA |
| 0.03  | -0.02 | 0     | 0.06  | 0.29 | 0.26    | 0.75     | 9.20E-07 | NA | NA | NA | NA |
| 0.06  | 0.1   | -0.05 | 0.06  | 0.29 | 0.025   | 0.068    | 0.1      | NA | NA | NA | NA |
| 0.18  | 0.29  | -0.11 | -0.04 | 0.29 | 0.00084 | 3.90E-06 | 0.19     | NA | NA | NA | NA |
| -0.06 | -0.03 | -0.03 | 0.04  | 0.29 | 0.69    | 0.021    | 0.025    | NA | NA | NA | NA |
| 0.05  | 0.08  | 0     | 0.04  | 0.29 | 0.086   | 1        | 0.17     | NA | NA | NA | NA |
| 0.09  | 0.12  | -0.02 | 0.03  | 0.3  | 0.065   | 0.21     | 0.18     | NA | NA | NA | NA |
| -0.04 | -0.03 | -0.06 | 0.03  | 0.3  | 0.23    | 7.80E-05 | 0.17     | NA | NA | NA | NA |
| 0.07  | 0.12  | -0.07 | -0.09 | 0.3  | 0.12    | 0.15     | 0.057    | NA | NA | NA | NA |
| 0.03  | 0.03  | -0.04 | -0.01 | 0.3  | 0.25    | 0.033    | 0.49     | NA | NA | NA | NA |
| 0.02  | 0     | -0.06 | 0     | 0.31 | 1       | 2.20E-05 | 0.97     | NA | NA | NA | NA |
| 0.11  | -0.06 | -0.02 | 0.04  | 0.31 | 0.018   | 0.17     | 0.04     | NA | NA | NA | NA |

|       |       |       |       |      |          |          |         |    |    |    |    |
|-------|-------|-------|-------|------|----------|----------|---------|----|----|----|----|
| 0.03  | 0     | -0.08 | -0.03 | 0.31 | 1        | 7.50E-07 | 0.11    | NA | NA | NA | NA |
| -0.03 | 0.05  | -0.08 | 0.02  | 0.31 | 0.27     | 5.80E-06 | 0.38    | NA | NA | NA | NA |
| -0.14 | -0.19 | -0.08 | -0.04 | 0.31 | 0.011    | 6.10E-05 | 0.031   | NA | NA | NA | NA |
| 0.02  | 0.06  | -0.04 | 0.02  | 0.32 | 0.0065   | 0.00099  | 0.1     | NA | NA | NA | NA |
| 0.03  | 0.06  | -0.03 | 0.04  | 0.32 | 0.011    | 0.016    | 0.0014  | NA | NA | NA | NA |
| 0.13  | 0.07  | -0.01 | 0.07  | 0.32 | 0.079    | 0.85     | 0.0037  | NA | NA | NA | NA |
| 0.03  | 0     | -0.02 | 0.02  | 0.32 | 0.93     | 0.11     | 0.21    | NA | NA | NA | NA |
| 0.08  | -0.05 | -0.07 | 0.03  | 0.32 | 0.47     | 0.00024  | 0.25    | NA | NA | NA | NA |
| -0.04 | 0.05  | -0.06 | -0.05 | 0.32 | 0.33     | 0.0095   | 0.026   | NA | NA | NA | NA |
| 0.09  | 0.04  | -0.07 | 0.07  | 0.33 | 0.37     | 0.0072   | 0.14    | NA | NA | NA | NA |
| 0.02  | 0.02  | -0.01 | 0.08  | 0.33 | 0.3      | 0.76     | 0.00042 | NA | NA | NA | NA |
| 0.04  | -0.01 | -0.03 | 0.01  | 0.33 | 0.9      | 0.1      | 0.64    | NA | NA | NA | NA |
| 0.05  | 0.06  | -0.02 | 0     | 0.33 | 0.22     | 0.4      | 0.95    | NA | NA | NA | NA |
| 0.06  | 0     | -0.03 | -0.04 | 0.33 | 1        | 0.2      | 0.22    | NA | NA | NA | NA |
| 0.04  | 0.01  | -0.02 | -0.05 | 0.33 | 0.73     | 0.26     | 0.03    | NA | NA | NA | NA |
| 0.05  | -0.03 | -0.06 | -0.02 | 0.34 | 0.32     | 0.0016   | 0.28    | NA | NA | NA | NA |
| 0.02  | 0.06  | 0     | 0     | 0.34 | 0.0033   | 0.85     | 0.86    | NA | NA | NA | NA |
| -0.09 | -0.11 | -0.1  | -0.08 | 0.34 | 0.34     | 0.027    | 0.07    | NA | NA | NA | NA |
| 0.17  | 0.65  | -0.09 | 0.12  | 0.35 | 0.12     | 0.043    | 0.047   | NA | NA | NA | NA |
| -0.36 | -0.17 | -0.09 | -0.11 | 0.36 | 1        | 0.19     | 0.15    | NA | NA | NA | NA |
| -0.05 | -0.01 | -0.01 | 0.02  | 0.36 | 0.9      | 0.81     | 0.24    | NA | NA | NA | NA |
| -0.06 | -0.09 | -0.1  | -0.07 | 0.36 | 0.011    | 0.019    | 0.056   | NA | NA | NA | NA |
| -0.12 | -0.03 | -0.06 | -0.07 | 0.36 | 0.91     | 0.032    | 0.01    | NA | NA | NA | NA |
| 0.04  | 0.02  | -0.04 | -0.06 | 0.36 | 0.55     | 0.11     | 0.016   | NA | NA | NA | NA |
| -0.18 | 0.02  | -0.14 | -0.04 | 0.36 | 1        | 0.00031  | 0.35    | NA | NA | NA | NA |
| 0.07  | 0.91  | -0.01 | 0.02  | 0.36 | 0.0049   | 0.92     | 0.86    | NA | NA | NA | NA |
| -0.3  | 0.09  | -0.09 | -0.07 | 0.36 | 0.77     | 0.2      | 0.2     | NA | NA | NA | NA |
| 0.02  | 0.09  | -0.01 | 0.04  | 0.37 | 5.60E-05 | 0.25     | 0.0094  | NA | NA | NA | NA |
| -0.05 | -0.03 | -0.03 | -0.06 | 0.37 | 0.53     | 0.34     | 0.014   | NA | NA | NA | NA |
| 0.06  | -0.06 | -0.02 | 0.04  | 0.37 | 0.059    | 0.36     | 0.034   | NA | NA | NA | NA |



|       |       |       |       |      |          |          |         |    |    |    |    |
|-------|-------|-------|-------|------|----------|----------|---------|----|----|----|----|
| 0.05  | 0.02  | -0.03 | 0     | 0.37 | 0.56     | 0.043    | 1       | NA | NA | NA | NA |
| 0.06  | 0.01  | -0.03 | 0     | 0.38 | 1        | 0.2      | 0.94    | NA | NA | NA | NA |
| -0.05 | 0.02  | -0.05 | -0.07 | 0.38 | 0.83     | 0.11     | 0.014   | NA | NA | NA | NA |
| 0.05  | 0.07  | -0.06 | 0.01  | 0.38 | 0.11     | 0.0019   | 0.81    | NA | NA | NA | NA |
| 0.03  | 0.01  | -0.02 | 0.01  | 0.38 | 0.59     | 0.32     | 0.9     | NA | NA | NA | NA |
| -0.05 | 0.1   | -0.03 | -0.01 | 0.38 | 0.16     | 0.21     | 0.69    | NA | NA | NA | NA |
| 0.05  | 0.12  | -0.05 | 0     | 0.38 | 0.0056   | 0.0042   | 0.87    | NA | NA | NA | NA |
| 0.12  | 0.05  | -0.1  | -0.06 | 0.38 | 0.59     | 9.50E-07 | 0.018   | NA | NA | NA | NA |
| -0.02 | -0.03 | -0.01 | 0.05  | 0.38 | 0.19     | 0.25     | 0.00087 | NA | NA | NA | NA |
| 0.06  | 0.24  | -0.1  | -0.07 | 0.38 | 0.0033   | 0.00034  | 0.025   | NA | NA | NA | NA |
| 0.03  | 0.06  | -0.02 | 0.05  | 0.38 | 0.03     | 0.39     | 0.0091  | NA | NA | NA | NA |
| 0.09  | 0.07  | -0.1  | -0.02 | 0.38 | 0.39     | 0.0015   | 0.55    | NA | NA | NA | NA |
| 0.05  | 0.17  | -0.08 | 0     | 0.38 | 2.00E-04 | 5.10E-05 | 0.98    | NA | NA | NA | NA |
| -0.02 | 0.02  | -0.03 | -0.01 | 0.38 | 0.5      | 0.011    | 0.54    | NA | NA | NA | NA |
| -0.1  | -0.05 | -0.05 | 0.01  | 0.39 | 0.62     | 0.023    | 0.73    | NA | NA | NA | NA |
| 0.05  | 0.01  | 0.03  | 0.05  | 0.39 | 1        | 0.19     | 0.028   | NA | NA | NA | NA |
| 0.05  | 0.05  | -0.09 | -0.09 | 0.39 | 0.37     | 0.00031  | 0.00017 | NA | NA | NA | NA |
| 0.03  | 0.06  | -0.03 | -0.01 | 0.4  | 0.006    | 0.055    | 0.4     | NA | NA | NA | NA |
| 0.04  | -0.03 | -0.03 | 0.04  | 0.4  | 0.53     | 0.19     | 0.026   | NA | NA | NA | NA |
| -0.13 | 0.02  | 0.01  | 0.02  | 0.4  | 0.88     | 0.75     | 0.37    | NA | NA | NA | NA |
| 0.06  | 0.02  | -0.06 | 0     | 0.41 | 0.93     | 0.00058  | 0.99    | NA | NA | NA | NA |
| 0.05  | 0.01  | -0.07 | 0.01  | 0.41 | 0.83     | 0.033    | 0.89    | NA | NA | NA | NA |
| 0.06  | 0.09  | -0.03 | 0.09  | 0.41 | 0.004    | 0.14     | 0.00097 | NA | NA | NA | NA |
| 0.07  | 0.03  | -0.02 | 0.06  | 0.42 | 0.64     | 0.26     | 0.002   | NA | NA | NA | NA |
| 0.02  | 0     | -0.03 | 0.01  | 0.42 | 0.88     | 0.0046   | 0.29    | NA | NA | NA | NA |
| 0.04  | -0.08 | -0.02 | 0.03  | 0.42 | 0.018    | 0.37     | 0.13    | NA | NA | NA | NA |
| 0.03  | -0.01 | -0.13 | -0.09 | 0.42 | 0.94     | 2.80E-07 | 0.00023 | NA | NA | NA | NA |
| 0.03  | 0.01  | -0.03 | 0     | 0.43 | 0.87     | 0.048    | 0.99    | NA | NA | NA | NA |
| 0.07  | -0.01 | 0.01  | 0.08  | 0.43 | 0.78     | 0.98     | 0.021   | NA | NA | NA | NA |
| 0.05  | 0.02  | -0.03 | 0.02  | 0.43 | 0.52     | 0.52     | 0.68    | NA | NA | NA | NA |

|       |       |       |       |      |          |          |          |    |    |    |    |
|-------|-------|-------|-------|------|----------|----------|----------|----|----|----|----|
| 0.04  | 0.08  | -0.09 | -0.03 | 0.43 | 0.043    | 0.0032   | 0.25     | NA | NA | NA | NA |
| 0.06  | 0.28  | -0.02 | 0.05  | 0.43 | 3.80E-05 | 0.48     | 0.16     | NA | NA | NA | NA |
| 0.06  | 0.03  | -0.07 | 0.08  | 0.43 | 0.45     | 0.0015   | 0.0033   | NA | NA | NA | NA |
| -0.86 | -0.75 | -0.13 | 0.24  | 0.44 | 0.6      | 0.034    | 1        | NA | NA | NA | NA |
| 0.1   | 0.06  | -0.07 | -0.07 | 0.45 | 0.062    | 0.031    | 0.0059   | NA | NA | NA | NA |
| -0.06 | 0.05  | -0.11 | 0     | 0.45 | 0.29     | 4.20E-08 | 1        | NA | NA | NA | NA |
| 0.81  | 0     | -0.03 | 0.05  | 0.45 | 1        | 0.29     | 0.12     | NA | NA | NA | NA |
| -0.02 | -0.02 | 0.01  | 0.08  | 0.45 | 0.52     | 0.85     | 0.00015  | NA | NA | NA | NA |
| -0.02 | -0.01 | -0.04 | 0.06  | 0.46 | 0.85     | 0.0087   | 8.20E-05 | NA | NA | NA | NA |
| 0.8   | 0.8   | -0.07 | -0.02 | 0.47 | 0.0017   | 0.45     | 0.98     | NA | NA | NA | NA |
| 0.83  | -0.12 | -0.13 | -0.16 | 0.47 | 0.42     | 0.0091   | 0.017    | NA | NA | NA | NA |
| 0.03  | -0.06 | -0.04 | -0.04 | 0.47 | 0.02     | 0.032    | 0.081    | NA | NA | NA | NA |
| 0.07  | 0.24  | -0.03 | 0.02  | 0.47 | 1.70E-05 | 0.16     | 0.56     | NA | NA | NA | NA |
| 0.14  | 0.06  | -0.14 | -0.07 | 0.47 | 0.13     | 0.02     | 0.047    | NA | NA | NA | NA |
| 0.03  | 0.02  | -0.1  | -0.05 | 0.48 | 0.6      | 1.40E-06 | 0.044    | NA | NA | NA | NA |
| -0.1  | 0.2   | 0.05  | 0.08  | 0.48 | 0.014    | 0.17     | 0.045    | NA | NA | NA | NA |
| 0.04  | -0.05 | -0.01 | 0.05  | 0.48 | 0.15     | 0.54     | 0.0091   | NA | NA | NA | NA |
| -0.04 | 0     | -0.1  | -0.07 | 0.48 | 1        | 8.60E-09 | 0.00028  | NA | NA | NA | NA |
| 0.11  | -0.01 | 0     | 0.05  | 0.49 | 1        | 1        | 0.18     | NA | NA | NA | NA |
| 0.02  | 0.07  | -0.04 | 0     | 0.49 | 0.0024   | 0.011    | 0.99     | NA | NA | NA | NA |
| 0.04  | 0.1   | -0.07 | 0.02  | 0.49 | 0.18     | 3.10E-05 | 0.56     | NA | NA | NA | NA |
| -0.81 | 0     | -0.1  | -0.1  | 0.49 | 1        | 0.13     | 0.084    | NA | NA | NA | NA |
| 0.05  | -0.01 | -0.07 | -0.04 | 0.5  | 1        | 0.003    | 0.4      | NA | NA | NA | NA |
| 0.19  | -0.15 | -0.09 | 0.01  | 0.5  | 0.14     | 0.0034   | 0.9      | NA | NA | NA | NA |
| 0.04  | 0.04  | -0.1  | 0     | 0.5  | 0.36     | 5.70E-05 | 0.95     | NA | NA | NA | NA |
| 0.03  | 0.1   | -0.04 | 0.02  | 0.5  | 0.0029   | 0.043    | 0.34     | NA | NA | NA | NA |
| 0.03  | -0.01 | -0.09 | -0.03 | 0.5  | 0.9      | 1.40E-05 | 0.22     | NA | NA | NA | NA |
| 0.03  | 0.01  | -0.07 | 0.01  | 0.5  | 0.92     | 2.70E-08 | 0.38     | NA | NA | NA | NA |
| 0.02  | 0.04  | 0     | 0.01  | 0.51 | 0.034    | 1        | 0.86     | NA | NA | NA | NA |
| 0.04  | -0.01 | -0.04 | -0.02 | 0.52 | 0.82     | 0.18     | 0.44     | NA | NA | NA | NA |

|       |       |       |       |      |          |          |          |    |    |    |    |
|-------|-------|-------|-------|------|----------|----------|----------|----|----|----|----|
| 0.14  | 0.21  | -0.11 | 0.04  | 0.52 | 0.21     | 0.00019  | 0.24     | NA | NA | NA | NA |
| 0.05  | 0.06  | -0.01 | 0.02  | 0.52 | 0.28     | 0.87     | 0.6      | NA | NA | NA | NA |
| 0.4   | 0.6   | -0.25 | NA    | 0.52 | 0.12     | 0.00046  | NA       | NA | NA | NA | NA |
| 0.06  | 0.14  | -0.03 | 0.02  | 0.52 | 0.0033   | 0.083    | 0.27     | NA | NA | NA | NA |
| 0.03  | 0.01  | -0.05 | 0     | 0.53 | 0.95     | 0.00014  | 0.9      | NA | NA | NA | NA |
| 0.1   | 0.18  | -0.05 | 0     | 0.53 | 0.51     | 0.23     | 1        | NA | NA | NA | NA |
| -0.03 | -0.03 | -0.06 | 0.03  | 0.53 | 0.36     | 1.30E-05 | 0.16     | NA | NA | NA | NA |
| 0.06  | 0.03  | -0.06 | 0.02  | 0.53 | 0.51     | 0.0046   | 0.35     | NA | NA | NA | NA |
| 0.16  | 0.66  | -0.02 | -0.04 | 0.53 | 0.24     | 0.58     | 0.3      | NA | NA | NA | NA |
| 0.04  | 0.07  | -0.03 | 0.09  | 0.53 | 0.13     | 0.057    | 3.00E-06 | NA | NA | NA | NA |
| 0.03  | 0.09  | -0.03 | 0.05  | 0.53 | 0.031    | 0.14     | 0.029    | NA | NA | NA | NA |
| 0.07  | 0.2   | 0.02  | 0.19  | 0.54 | 0.09     | 0.98     | 0.12     | NA | NA | NA | NA |
| 0.02  | 0.02  | -0.08 | -0.04 | 0.54 | 0.4      | 5.20E-06 | 0.047    | NA | NA | NA | NA |
| -0.02 | -0.02 | 0.02  | -0.03 | 0.55 | 0.59     | 0.43     | 0.016    | NA | NA | NA | NA |
| -0.02 | 0.01  | -0.06 | -0.03 | 0.55 | 0.87     | 5.70E-05 | 0.12     | NA | NA | NA | NA |
| 0.27  | 0.09  | -0.03 | 0.06  | 0.55 | 0.3      | 0.22     | 0.08     | NA | NA | NA | NA |
| 0.03  | 0.22  | 0.02  | 0.13  | 0.56 | 0.00011  | 0.76     | 0.0069   | NA | NA | NA | NA |
| -0.03 | -0.04 | -0.01 | 0     | 0.56 | 0.35     | 0.44     | 0.78     | NA | NA | NA | NA |
| 0.05  | 0.12  | 0.03  | 0.01  | 0.56 | 0.068    | 0.44     | 0.87     | NA | NA | NA | NA |
| 0.11  | 0.73  | -0.02 | -0.01 | 0.57 | 2.80E-09 | 0.49     | 0.84     | NA | NA | NA | NA |
| 0.15  | 0.17  | -0.1  | -0.05 | 0.57 | 0.088    | 1.40E-05 | 0.075    | NA | NA | NA | NA |
| 0.05  | 0.1   | -0.05 | 0.01  | 0.57 | 0.096    | 0.012    | 0.8      | NA | NA | NA | NA |
| -0.04 | 0.09  | -0.03 | 0.01  | 0.57 | 0.043    | 0.11     | 0.36     | NA | NA | NA | NA |
| 0.03  | -0.01 | -0.03 | 0     | 0.57 | 1        | 0.076    | 1        | NA | NA | NA | NA |
| 0.01  | 0.02  | -0.04 | -0.02 | 0.58 | 0.45     | 0.0013   | 0.16     | NA | NA | NA | NA |
| 0.1   | 0.32  | -0.01 | 0.05  | 0.58 | 0.0042   | 0.87     | 0.28     | NA | NA | NA | NA |
| 0.14  | 0.15  | 0.04  | 0.03  | 0.58 | 0.028    | 0.28     | 0.52     | NA | NA | NA | NA |
| -0.03 | 0.08  | 0     | 0.1   | 0.58 | 0.077    | 0.98     | 2.60E-07 | NA | NA | NA | NA |
| 0.03  | 0.09  | -0.06 | 0.03  | 0.58 | 0.031    | 0.00039  | 0.17     | NA | NA | NA | NA |
| -0.08 | -0.06 | -0.03 | 0.03  | 0.58 | 0.96     | 0.6      | 0.52     | NA | NA | NA | NA |

|       |       |       |       |      |         |          |         |    |    |    |    |
|-------|-------|-------|-------|------|---------|----------|---------|----|----|----|----|
| 0.06  | 0.02  | -0.03 | 0.03  | 0.59 | 0.89    | 0.094    | 0.23    | NA | NA | NA | NA |
| 0.8   | 0.8   | -0.1  | 0.09  | 0.59 | 0.59    | 0.56     | 0.64    | NA | NA | NA | NA |
| 0.46  | NA    | 0.05  | 0.23  | 0.6  | NA      | 0.54     | 0.0026  | NA | NA | NA | NA |
| -0.14 | -0.03 | -0.01 | 0.04  | 0.6  | 1       | 0.8      | 0.41    | NA | NA | NA | NA |
| -0.12 | 0.03  | -0.01 | 0.09  | 0.61 | 0.96    | 0.71     | 0.0034  | NA | NA | NA | NA |
| -0.04 | -0.02 | -0.02 | -0.02 | 0.61 | 0.61    | 0.62     | 0.55    | NA | NA | NA | NA |
| 0.05  | -0.06 | -0.06 | 0.01  | 0.61 | 0.29    | 0.0053   | 0.7     | NA | NA | NA | NA |
| 0.03  | 0.04  | -0.06 | -0.02 | 0.62 | 0.12    | 5.40E-05 | 0.22    | NA | NA | NA | NA |
| 0.02  | 0.06  | -0.08 | -0.09 | 0.62 | 0.032   | 0.0068   | 0.0013  | NA | NA | NA | NA |
| 0.02  | 0.05  | -0.04 | 0     | 0.63 | 0.14    | 0.034    | 1       | NA | NA | NA | NA |
| -0.05 | -0.09 | -0.01 | 0.06  | 0.63 | 0.39    | 0.59     | 0.0081  | NA | NA | NA | NA |
| 0.06  | -0.09 | 0     | 0.05  | 0.63 | 0.19    | 1        | 0.12    | NA | NA | NA | NA |
| -0.04 | 0.02  | 0     | 0.09  | 0.64 | 0.94    | 1        | 0.00038 | NA | NA | NA | NA |
| 0.02  | -0.03 | -0.05 | 0.01  | 0.64 | 0.1     | 0.086    | 0.91    | NA | NA | NA | NA |
| -0.05 | -0.08 | -0.04 | 0.01  | 0.65 | 0.13    | 0.049    | 0.6     | NA | NA | NA | NA |
| 0.02  | -0.02 | -0.06 | 0     | 0.66 | 0.61    | 2.40E-05 | 0.84    | NA | NA | NA | NA |
| 0.03  | 0.09  | -0.01 | 0.08  | 0.66 | 0.0043  | 0.52     | 0.0037  | NA | NA | NA | NA |
| 0.02  | 0.03  | -0.01 | -0.01 | 0.66 | 0.45    | 0.68     | 0.65    | NA | NA | NA | NA |
| -0.02 | 0     | -0.04 | -0.01 | 0.66 | 1       | 0.085    | 0.82    | NA | NA | NA | NA |
| 0.02  | 0.08  | -0.04 | -0.02 | 0.66 | 0.073   | 0.11     | 0.4     | NA | NA | NA | NA |
| -0.02 | -0.05 | -0.05 | -0.03 | 0.67 | 0.25    | 0.0081   | 0.071   | NA | NA | NA | NA |
| -0.03 | -0.01 | -0.04 | -0.04 | 0.67 | 0.94    | 0.13     | 0.26    | NA | NA | NA | NA |
| 0.08  | NA    | -0.06 | 0.05  | 0.67 | NA      | 1        | 1       | NA | NA | NA | NA |
| 0.01  | 0.03  | -0.05 | -0.02 | 0.68 | 0.068   | 3.80E-05 | 0.069   | NA | NA | NA | NA |
| 0.02  | 0.01  | -0.09 | -0.02 | 0.68 | 0.74    | 3.50E-06 | 0.47    | NA | NA | NA | NA |
| -0.01 | -0.04 | -0.01 | -0.05 | 0.69 | 0.14    | 0.81     | 0.12    | NA | NA | NA | NA |
| 0.01  | 0.11  | -0.03 | -0.01 | 0.69 | 0.00028 | 0.029    | 0.49    | NA | NA | NA | NA |
| 0.35  | 0.04  | -0.08 | 0.01  | 0.7  | 0.56    | 0.00014  | 0.88    | NA | NA | NA | NA |
| 0.03  | -0.06 | -0.07 | 0.01  | 0.71 | 0.35    | 0.014    | 0.79    | NA | NA | NA | NA |
| 0.09  | 0.04  | -0.06 | 0.01  | 0.71 | 0.54    | 0.00096  | 0.6     | NA | NA | NA | NA |

|       |       |       |       |      |          |          |          |    |    |    |    |
|-------|-------|-------|-------|------|----------|----------|----------|----|----|----|----|
| 0.04  | 0.04  | 0.02  | 0.23  | 0.71 | 0.61     | 0.61     | 1.20E-09 | NA | NA | NA | NA |
| 0.1   | 0.02  | 0.02  | 0.02  | 0.71 | 1        | 0.88     | 0.8      | NA | NA | NA | NA |
| 0.01  | 0.03  | -0.02 | 0.06  | 0.71 | 0.14     | 0.21     | 4.10E-06 | NA | NA | NA | NA |
| -0.02 | -0.05 | -0.02 | 0.05  | 0.72 | 0.2      | 0.21     | 0.0022   | NA | NA | NA | NA |
| 0.12  | -0.02 | 0.07  | 0.06  | 0.72 | 1        | 0.8      | 0.82     | NA | NA | NA | NA |
| 0.05  | 0.06  | -0.09 | 0.01  | 0.72 | 0.22     | 1.80E-07 | 0.74     | NA | NA | NA | NA |
| 0.01  | 0.08  | -0.02 | -0.01 | 0.72 | 2.30E-05 | 0.06     | 0.61     | NA | NA | NA | NA |
| 0.02  | -0.08 | -0.05 | 0.04  | 0.72 | 0.021    | 0.0091   | 0.12     | NA | NA | NA | NA |
| 0.03  | 0.05  | 0.02  | 0.02  | 0.72 | 0.64     | 0.44     | 0.36     | NA | NA | NA | NA |
| -0.01 | 0.01  | -0.02 | 0.01  | 0.72 | 0.54     | 0.37     | 0.43     | NA | NA | NA | NA |
| 0.69  | 0.46  | 0.04  | 0.09  | 0.72 | 0.012    | 0.33     | 0.039    | NA | NA | NA | NA |
| -0.02 | 0.03  | -0.03 | 0.02  | 0.73 | 0.59     | 0.11     | 0.34     | NA | NA | NA | NA |
| -0.02 | 0.03  | 0     | 0.02  | 0.74 | 0.73     | 1        | 0.3      | NA | NA | NA | NA |
| 0.06  | 0.22  | 0.02  | -0.03 | 0.74 | 0.0085   | 0.74     | 0.51     | NA | NA | NA | NA |
| -0.26 | 0.14  | 0.19  | 0.49  | 0.74 | 1        | 0.082    | 8.40E-07 | NA | NA | NA | NA |
| 0.03  | 0.15  | -0.11 | -0.03 | 0.74 | 0.18     | 0.00013  | 0.45     | NA | NA | NA | NA |
| 0.03  | -0.07 | 0     | 0.06  | 0.74 | 0.0093   | 0.94     | 0.015    | NA | NA | NA | NA |
| 0.06  | -0.01 | -0.05 | -0.07 | 0.74 | 1        | 0.26     | 0.057    | NA | NA | NA | NA |
| 0.69  | 0     | -0.07 | -0.11 | 0.75 | 1        | 0.35     | 0.055    | NA | NA | NA | NA |
| 0.04  | -0.06 | -0.07 | -0.03 | 0.75 | 0.28     | 0.00015  | 0.11     | NA | NA | NA | NA |
| 0.03  | 0.3   | 0.03  | 0.25  | 0.75 | 0.00034  | 0.54     | 2.00E-06 | NA | NA | NA | NA |
| -0.04 | -0.12 | -0.09 | -0.04 | 0.75 | 0.23     | 0.049    | 0.59     | NA | NA | NA | NA |
| 0.02  | 0.03  | -0.09 | -0.05 | 0.75 | 0.68     | 0.00024  | 0.037    | NA | NA | NA | NA |
| 0.01  | 0.03  | -0.03 | -0.03 | 0.76 | 0.35     | 0.088    | 0.083    | NA | NA | NA | NA |
| 0.02  | 0.03  | -0.09 | -0.05 | 0.76 | 0.93     | 1.60E-06 | 0.017    | NA | NA | NA | NA |
| 0.03  | -0.01 | -0.01 | 0.03  | 0.76 | 0.72     | 0.68     | 0.18     | NA | NA | NA | NA |
| 0.03  | 0.06  | -0.11 | -0.01 | 0.77 | 0.52     | 2.00E-05 | 0.79     | NA | NA | NA | NA |
| 0.07  | 0.87  | 0.06  | 0.03  | 0.77 | 0.34     | 0.11     | 0.54     | NA | NA | NA | NA |
| 0.02  | 0.24  | -0.03 | -0.01 | 0.77 | 0.00012  | 0.24     | 0.62     | NA | NA | NA | NA |
| -0.03 | 0.07  | -0.05 | 0.01  | 0.77 | 0.12     | 0.041    | 0.87     | NA | NA | NA | NA |

|       |       |       |       |      |          |          |          |    |    |    |    |
|-------|-------|-------|-------|------|----------|----------|----------|----|----|----|----|
| 0.65  | 0.45  | -0.05 | 0.2   | 0.78 | 0.15     | 0.66     | 0.077    | NA | NA | NA | NA |
| 0.02  | 0.03  | -0.05 | -0.01 | 0.78 | 0.37     | 0.0026   | 0.64     | NA | NA | NA | NA |
| -0.13 | -0.48 | 0.11  | -0.07 | 0.78 | 8.40E-05 | 0.038    | 0.017    | NA | NA | NA | NA |
| -0.04 | 0.18  | -0.08 | -0.06 | 0.79 | 0.00016  | 0.035    | 0.23     | NA | NA | NA | NA |
| 0.02  | 0.08  | -0.04 | 0     | 0.79 | 0.05     | 0.028    | 0.89     | NA | NA | NA | NA |
| 0.08  | 0.06  | -0.01 | 0.15  | 0.8  | 0.32     | 0.73     | 3.10E-07 | NA | NA | NA | NA |
| 0.08  | 0.11  | -0.03 | 0.07  | 0.8  | 0.48     | 0.75     | 0.18     | NA | NA | NA | NA |
| 0.04  | 0.02  | -0.08 | 0.11  | 0.81 | 0.78     | 0.00081  | 0.0047   | NA | NA | NA | NA |
| -0.01 | 0.08  | -0.07 | -0.01 | 0.81 | 0.0079   | 1.50E-06 | 0.75     | NA | NA | NA | NA |
| 0.02  | 0.11  | 0.01  | 0.06  | 0.81 | 0.015    | 0.64     | 0.013    | NA | NA | NA | NA |
| 0.33  | -0.08 | -0.01 | 0.17  | 0.81 | 0.81     | 0.59     | 2.90E-08 | NA | NA | NA | NA |
| 0.06  | -0.01 | -0.18 | 0.04  | 0.82 | 1        | 0.0056   | 0.67     | NA | NA | NA | NA |
| 0.03  | 0.13  | -0.04 | 0.03  | 0.82 | 0.0059   | 0.5      | 0.55     | NA | NA | NA | NA |
| -0.01 | -0.02 | -0.03 | -0.01 | 0.82 | 0.32     | 0.071    | 0.7      | NA | NA | NA | NA |
| 0.03  | -0.03 | -0.07 | -0.06 | 0.82 | 0.66     | 0.038    | 0.018    | NA | NA | NA | NA |
| 0.06  | 0.05  | -0.02 | 0.08  | 0.83 | 0.24     | 0.47     | 0.053    | NA | NA | NA | NA |
| 0.01  | -0.01 | 0     | -0.01 | 0.83 | 0.99     | 1        | 0.54     | NA | NA | NA | NA |
| 0.02  | -0.01 | -0.03 | 0.03  | 0.84 | 0.53     | 0.0049   | 0.036    | NA | NA | NA | NA |
| -0.02 | -0.04 | -0.1  | 0.11  | 0.84 | 0.62     | 4.60E-05 | 3.00E-04 | NA | NA | NA | NA |
| -0.02 | -0.1  | 0.06  | 0.05  | 0.84 | 0.2      | 0.06     | 0.034    | NA | NA | NA | NA |
| -0.02 | 0.05  | -0.08 | -0.06 | 0.85 | 0.28     | 1.80E-05 | 0.0037   | NA | NA | NA | NA |
| 0.08  | 0.07  | -0.05 | 0.07  | 0.85 | 0.81     | 0.25     | 0.14     | NA | NA | NA | NA |
| -0.22 | NA    | -0.21 | NA    | 0.85 | NA       | 0.23     | NA       | NA | NA | NA | NA |
| 0.08  | NA    | -0.06 | 0.11  | 0.85 | NA       | 0.035    | 0.014    | NA | NA | NA | NA |
| 0.01  | 0.03  | -0.03 | 0.03  | 0.85 | 0.22     | 0.049    | 0.11     | NA | NA | NA | NA |
| -0.11 | NA    | -0.01 | -0.03 | 0.85 | NA       | 1        | 0.59     | NA | NA | NA | NA |
| -0.06 | -0.14 | -0.02 | 0     | 0.86 | 0.25     | 0.46     | 1        | NA | NA | NA | NA |
| 0.04  | 0.22  | 0     | 0.02  | 0.86 | 0.017    | 0.98     | 0.43     | NA | NA | NA | NA |
| -0.02 | 0.01  | -0.04 | -0.11 | 0.86 | 1        | 0.16     | 5.30E-06 | NA | NA | NA | NA |
| 0.02  | 0     | -0.09 | -0.05 | 0.86 | 1        | 0.00063  | 0.067    | NA | NA | NA | NA |

|       |       |       |       |      |        |          |          |    |    |    |    |
|-------|-------|-------|-------|------|--------|----------|----------|----|----|----|----|
| 0.07  | 0.4   | -0.08 | 0.1   | 0.86 | 0.0073 | 0.4      | 0.41     | NA | NA | NA | NA |
| 0.05  | -0.16 | -0.06 | -0.02 | 0.86 | 0.014  | 0.016    | 0.55     | NA | NA | NA | NA |
| 0.01  | 0.02  | 0.02  | 0.07  | 0.86 | 0.79   | 0.27     | 4.00E-04 | NA | NA | NA | NA |
| -0.02 | 0.02  | 0.01  | 0.01  | 0.86 | 0.81   | 0.98     | 0.72     | NA | NA | NA | NA |
| 0.01  | 0.03  | -0.04 | -0.02 | 0.86 | 0.057  | 0.0024   | 0.24     | NA | NA | NA | NA |
| 0.02  | 0.08  | -0.06 | -0.05 | 0.87 | 0.034  | 0.02     | 0.13     | NA | NA | NA | NA |
| 0.02  | -0.02 | -0.18 | -0.1  | 0.87 | 0.64   | 2.20E-07 | 0.023    | NA | NA | NA | NA |
| -0.01 | 0     | -0.06 | 0.02  | 0.87 | 1      | 0.018    | 0.63     | NA | NA | NA | NA |
| -0.01 | -0.06 | -0.05 | 0.05  | 0.88 | 0.74   | 0.0034   | 0.042    | NA | NA | NA | NA |
| 0.1   | 0     | -0.1  | 0.08  | 0.88 | 1      | 0.061    | 0.13     | NA | NA | NA | NA |
| 0.06  | 0.09  | -0.02 | -0.01 | 0.88 | 0.7    | 0.49     | 0.76     | NA | NA | NA | NA |
| 0.06  | -0.01 | -0.06 | -0.01 | 0.88 | 0.87   | 0.011    | 0.59     | NA | NA | NA | NA |
| -0.09 | -0.11 | 0.02  | 0.05  | 0.88 | 0.44   | 0.61     | 0.069    | NA | NA | NA | NA |
| -0.04 | -0.28 | -0.01 | 0     | 0.88 | 0.0011 | 0.74     | 1        | NA | NA | NA | NA |
| 0.01  | 0     | -0.02 | 0     | 0.89 | 1      | 0.16     | 1        | NA | NA | NA | NA |
| 0.1   | -0.16 | -0.06 | -0.02 | 0.89 | 0.4    | 0.0032   | 0.69     | NA | NA | NA | NA |
| 0.16  | 0.02  | -0.05 | 0.03  | 0.89 | 0.92   | 0.052    | 0.42     | NA | NA | NA | NA |
| 0.05  | -0.06 | 0.06  | -0.02 | 0.89 | 0.78   | 0.52     | 1        | NA | NA | NA | NA |
| 0.03  | 0.01  | -0.03 | 0.07  | 0.89 | 1      | 0.19     | 0.024    | NA | NA | NA | NA |
| 0.03  | 0.01  | -0.16 | -0.04 | 0.89 | 1      | 0.0055   | 0.55     | NA | NA | NA | NA |
| -0.07 | -0.06 | 0     | 0.11  | 0.89 | 0.49   | 1        | 0.00033  | NA | NA | NA | NA |
| -0.03 | 0.07  | 0.03  | 0.02  | 0.9  | 0.39   | 0.53     | 0.49     | NA | NA | NA | NA |
| -0.1  | 0.01  | -0.01 | 0.07  | 0.9  | 1      | 0.82     | 0.058    | NA | NA | NA | NA |
| 0.01  | -0.04 | -0.04 | -0.02 | 0.9  | 0.075  | 0.0011   | 0.092    | NA | NA | NA | NA |
| -0.2  | NA    | -0.26 | -0.09 | 0.9  | NA     | 0.0022   | 0.42     | NA | NA | NA | NA |
| -0.01 | 0.02  | -0.02 | 0.03  | 0.91 | 0.78   | 0.34     | 0.26     | NA | NA | NA | NA |
| 0.01  | 0.01  | -0.04 | -0.02 | 0.91 | 0.64   | 0.00016  | 0.12     | NA | NA | NA | NA |
| 0.01  | -0.01 | -0.1  | 0.01  | 0.92 | 0.93   | 9.00E-04 | 0.86     | NA | NA | NA | NA |
| -0.02 | 0     | -0.12 | -0.04 | 0.92 | 1      | 2.00E-05 | 0.3      | NA | NA | NA | NA |
| 0.02  | -0.01 | -0.05 | 0.01  | 0.92 | 0.89   | 0.0051   | 0.58     | NA | NA | NA | NA |

|       |       |       |       |      |          |          |          |    |    |    |    |
|-------|-------|-------|-------|------|----------|----------|----------|----|----|----|----|
| 0.03  | 0.08  | -0.04 | 0.12  | 0.92 | 0.17     | 0.2      | 0.0027   | NA | NA | NA | NA |
| 0.36  | 0.26  | -0.1  | -0.04 | 0.92 | 0.44     | 0.00025  | 0.28     | NA | NA | NA | NA |
| 0.02  | 0.52  | -0.05 | -0.03 | 0.93 | 9.30E-05 | 0.11     | 0.45     | NA | NA | NA | NA |
| 0.14  | 0.34  | -0.01 | 0.05  | 0.93 | 5.00E-04 | 0.83     | 0.18     | NA | NA | NA | NA |
| -0.03 | -0.01 | -0.03 | 0.03  | 0.93 | 0.98     | 0.5      | 0.25     | NA | NA | NA | NA |
| -0.01 | 0.01  | -0.04 | 0     | 0.93 | 0.81     | 0.031    | 0.98     | NA | NA | NA | NA |
| 0.15  | 0.08  | -0.29 | 0.5   | 0.93 | 0.95     | 0.17     | 0.6      | NA | NA | NA | NA |
| -0.01 | 0.15  | -0.05 | -0.02 | 0.94 | 8.50E-05 | 0.013    | 0.47     | NA | NA | NA | NA |
| 0.03  | 0.01  | -0.05 | 0.03  | 0.94 | 0.9      | 0.18     | 0.53     | NA | NA | NA | NA |
| -0.01 | 0     | -0.06 | -0.04 | 0.94 | 1        | 0.00019  | 0.065    | NA | NA | NA | NA |
| -0.01 | 0     | -0.04 | -0.01 | 0.94 | 1        | 0.03     | 0.69     | NA | NA | NA | NA |
| -0.02 | 0.03  | -0.02 | -0.01 | 0.94 | 0.59     | 0.57     | 0.87     | NA | NA | NA | NA |
| 0.02  | 0.08  | 0.05  | 0.04  | 0.95 | 0.016    | 0.0079   | 0.045    | NA | NA | NA | NA |
| 0.04  | -0.02 | -0.02 | 0.11  | 0.95 | 0.92     | 0.6      | 0.0042   | NA | NA | NA | NA |
| -0.01 | -0.06 | -0.05 | 0.03  | 0.96 | 0.2      | 0.088    | 0.51     | NA | NA | NA | NA |
| 0.04  | 0.19  | -0.03 | 0.03  | 0.96 | 0.0029   | 0.14     | 0.29     | NA | NA | NA | NA |
| -0.04 | -0.01 | -0.06 | 0.04  | 0.96 | 1        | 0.093    | 0.37     | NA | NA | NA | NA |
| 0.01  | 0.04  | -0.07 | -0.04 | 0.96 | 0.065    | 7.30E-05 | 0.029    | NA | NA | NA | NA |
| 0     | 0.05  | -0.01 | 0.06  | 0.96 | 0.023    | 0.31     | 7.10E-06 | NA | NA | NA | NA |
| 0.01  | -0.01 | 0     | 0.01  | 0.96 | 0.92     | 0.91     | 0.64     | NA | NA | NA | NA |
| 0.05  | 0.03  | 0.09  | 0.02  | 0.96 | 0.63     | 0.0014   | 0.52     | NA | NA | NA | NA |
| -0.12 | -0.24 | -0.09 | 0.04  | 0.97 | 0.15     | 0.072    | 0.25     | NA | NA | NA | NA |
| 0.01  | -0.01 | -0.03 | 0     | 0.97 | 0.87     | 0.32     | 1        | NA | NA | NA | NA |
| 0     | 0     | -0.04 | 0.01  | 0.97 | 0.9      | 0.0066   | 0.48     | NA | NA | NA | NA |
| 0.01  | 0.11  | -0.03 | 0.1   | 0.97 | 0.00019  | 0.085    | 5.10E-06 | NA | NA | NA | NA |
| 0.01  | 0.14  | -0.04 | 0.03  | 0.98 | 0.017    | 0.069    | 0.33     | NA | NA | NA | NA |
| -0.02 | 0.04  | -0.12 | -0.13 | 0.99 | 0.52     | 0.00087  | 0.00084  | NA | NA | NA | NA |
| -0.06 | -0.12 | 0.06  | -0.01 | 0.99 | 0.48     | 0.0066   | 0.89     | NA | NA | NA | NA |
| -0.01 | 0     | -0.01 | 0.03  | 0.99 | 1        | 1        | 0.52     | NA | NA | NA | NA |
| 0.01  | 0.07  | 0     | 0.06  | 0.99 | 0.097    | 0.98     | 0.06     | NA | NA | NA | NA |



|       |       |       |       |   |          |          |          |    |    |    |    |
|-------|-------|-------|-------|---|----------|----------|----------|----|----|----|----|
| 0     | 0.17  | -0.04 | 0.01  | 1 | 1.80E-08 | 0.045    | 0.55     | NA | NA | NA | NA |
| 0     | 0.14  | -0.12 | 0.18  | 1 | 0.065    | 1.50E-05 | 0.00047  | NA | NA | NA | NA |
| -0.02 | 0.1   | -0.02 | 0.12  | 1 | 0.16     | 0.12     | 5.90E-09 | NA | NA | NA | NA |
| 0.01  | 0.03  | -0.02 | -0.09 | 1 | 0.84     | 1        | 0.19     | NA | NA | NA | NA |
| 0     | 0.01  | -0.03 | 0     | 1 | 1        | 0.27     | 0.95     | NA | NA | NA | NA |
| 0     | -0.09 | -0.05 | 0.13  | 1 | 1        | 0.029    | 0.00036  | NA | NA | NA | NA |
| 0.01  | 0.05  | 0.03  | 0.05  | 1 | 0.26     | 0.33     | 0.065    | NA | NA | NA | NA |
| -0.01 | -0.02 | -0.09 | 0     | 1 | 1        | 2.60E-05 | 0.96     | NA | NA | NA | NA |
| 0     | 0.06  | -0.04 | -0.01 | 1 | 0.056    | 0.044    | 0.44     | NA | NA | NA | NA |
| 0     | NA    | -0.2  | NA    | 1 | NA       | 0.0018   | NA       | NA | NA | NA | NA |
| -0.04 | NA    | 0.03  | -0.04 | 1 | NA       | 0.71     | 0.36     | NA | NA | NA | NA |
| 0     | 0.08  | 0.02  | 0.04  | 1 | 0.00059  | 0.08     | 0.001    | NA | NA | NA | NA |
| -0.01 | -0.03 | -0.02 | 0.04  | 1 | 0.36     | 0.5      | 0.62     | NA | NA | NA | NA |
| 0.02  | 0.02  | -0.08 | -0.02 | 1 | 0.81     | 0.021    | 0.65     | NA | NA | NA | NA |
| 0     | 0.02  | -0.08 | 0.01  | 1 | 1        | 0.005    | 0.88     | NA | NA | NA | NA |
| 0     | 0.05  | -0.05 | 0.06  | 1 | 0.28     | 0.0091   | 0.011    | NA | NA | NA | NA |
| 0.01  | 0.15  | -0.01 | 0.02  | 1 | 0.4      | 0.73     | 0.49     | NA | NA | NA | NA |
| 0.01  | -0.01 | 0.01  | 0.04  | 1 | 1        | 0.76     | 0.19     | NA | NA | NA | NA |
| 0     | 0.01  | -0.04 | 0.03  | 1 | 0.84     | 0.00085  | 0.064    | NA | NA | NA | NA |
| -0.3  | -0.38 | 0     | 0.06  | 1 | 0.65     | 1        | 0.06     | NA | NA | NA | NA |
| 0     | 0.05  | 0     | 0.02  | 1 | 0.056    | 0.8      | 0.044    | NA | NA | NA | NA |
| 0.43  | -0.28 | -0.05 | -0.04 | 1 | 0.083    | 0.079    | 0.16     | NA | NA | NA | NA |
| 0.01  | 0.21  | -0.11 | -0.1  | 1 | 0.41     | 0.0045   | 0.0034   | NA | NA | NA | NA |
| 0     | 0.02  | -0.04 | -0.03 | 1 | 1        | 0.34     | 0.49     | NA | NA | NA | NA |
| 0     | 0.04  | -0.02 | 0.03  | 1 | 0.021    | 0.23     | 0.057    | NA | NA | NA | NA |
| 0     | -0.04 | -0.11 | -0.05 | 1 | 0.8      | 5.60E-06 | 0.031    | NA | NA | NA | NA |
| 0.13  | -0.17 | -0.13 | -0.1  | 1 | 0.058    | 2.60E-06 | 1.00E-04 | NA | NA | NA | NA |
| 0.02  | 0     | -0.01 | -0.03 | 1 | 1        | 0.83     | 0.18     | NA | NA | NA | NA |
| 0.03  | 0.01  | -0.05 | -0.01 | 1 | 1        | 0.083    | 0.92     | NA | NA | NA | NA |
| 0     | -0.05 | 0.01  | -0.01 | 1 | 0.28     | 0.85     | 0.67     | NA | NA | NA | NA |

|       |       |       |       |   |        |          |         |    |    |    |    |
|-------|-------|-------|-------|---|--------|----------|---------|----|----|----|----|
| 0     | 0.03  | -0.05 | 0.01  | 1 | 0.55   | 0.029    | 0.68    | NA | NA | NA | NA |
| 0     | -0.08 | -0.02 | -0.02 | 1 | 0.05   | 0.5      | 0.61    | NA | NA | NA | NA |
| 0     | -0.04 | -0.01 | 0.05  | 1 | 0.065  | 0.26     | 0.00051 | NA | NA | NA | NA |
| 0.01  | 0.09  | 0.1   | NA    | 1 | 0.66   | 0.041    | NA      | NA | NA | NA | NA |
| 0.02  | 0.02  | -0.08 | 0.03  | 1 | 0.56   | 5.50E-08 | 0.077   | NA | NA | NA | NA |
| -0.01 | 0.01  | -0.08 | -0.06 | 1 | 1      | 0.0049   | 0.015   | NA | NA | NA | NA |
| 0.01  | 0     | 0.01  | 0.19  | 1 | 1      | 0.88     | 0.00022 | NA | NA | NA | NA |
| 0     | 0.02  | -0.01 | 0.05  | 1 | 0.38   | 0.51     | 0.0099  | NA | NA | NA | NA |
| 0.13  | 0.03  | -0.05 | 0.02  | 1 | 0.84   | 0.15     | 0.64    | NA | NA | NA | NA |
| 0.01  | 0.06  | -0.04 | 0.01  | 1 | 0.0075 | 0.00076  | 0.48    | NA | NA | NA | NA |
| 0     | -0.13 | -0.01 | 0.08  | 1 | 0.014  | 0.69     | 0.0027  | NA | NA | NA | NA |
| -0.01 | 0.1   | -0.05 | -0.04 | 1 | 0.11   | 0.028    | 0.06    | NA | NA | NA | NA |
| 0.06  | 0.01  | 0.01  | 0.11  | 1 | 1      | 0.71     | 0.0019  | NA | NA | NA | NA |
| 0     | 0.02  | -0.02 | 0.02  | 1 | 0.73   | 0.27     | 0.45    | NA | NA | NA | NA |
| 0     | 0.11  | -0.11 | -0.03 | 1 | 0.0055 | 4.50E-06 | 0.35    | NA | NA | NA | NA |
| 0.01  | 0.13  | -0.05 | 0.02  | 1 | 0.0057 | 0.017    | 0.49    | NA | NA | NA | NA |
| 0.01  | 0.12  | -0.01 | 0.05  | 1 | 0.21   | 0.81     | 0.027   | NA | NA | NA | NA |
| 0     | 0.06  | -0.03 | -0.04 | 1 | 0.35   | 0.29     | 0.13    | NA | NA | NA | NA |
| -0.04 | -0.01 | -0.01 | 0.03  | 1 | 1      | 0.74     | 0.14    | NA | NA | NA | NA |
| 0     | 0.02  | -0.04 | 0.01  | 1 | 0.54   | 0.025    | 0.89    | NA | NA | NA | NA |
| 0.02  | 0.03  | 0.04  | 0.06  | 1 | 0.91   | 0.062    | 0.028   | NA | NA | NA | NA |
| 0.07  | 0.05  | -0.09 | -0.06 | 1 | 1      | 0.16     | 0.39    | NA | NA | NA | NA |
| 0     | -0.06 | 0     | 0.02  | 1 | 0.27   | 0.96     | 0.31    | NA | NA | NA | NA |
| -0.02 | 0.02  | 0.01  | 0.02  | 1 | 0.95   | 0.87     | 0.62    | NA | NA | NA | NA |
| 0     | 0.2   | -0.05 | 0.01  | 1 | 0.094  | 0.14     | 0.81    | NA | NA | NA | NA |
| 0.5   | -0.29 | -0.03 | 0.05  | 1 | 0.077  | 1        | 0.57    | NA | NA | NA | NA |
| -0.01 | -0.03 | -0.1  | -0.01 | 1 | 0.68   | 0.00015  | 0.78    | NA | NA | NA | NA |
| -0.01 | -0.02 | -0.09 | -0.08 | 1 | 0.51   | 6.20E-05 | 0.00063 | NA | NA | NA | NA |
| -0.01 | -0.05 | 0.03  | 0.04  | 1 | 0.42   | 0.39     | 0.26    | NA | NA | NA | NA |
| -0.01 | -0.03 | -0.04 | -0.01 | 1 | 1      | 0.26     | 0.74    | NA | NA | NA | NA |

|       |       |       |       |   |          |          |          |    |    |    |    |
|-------|-------|-------|-------|---|----------|----------|----------|----|----|----|----|
| 0.01  | 0.03  | -0.13 | -0.08 | 1 | 0.77     | 5.20E-06 | 0.0052   | NA | NA | NA | NA |
| 0.01  | -0.02 | 0     | 0.02  | 1 | 0.7      | 1        | 0.55     | NA | NA | NA | NA |
| 0     | -0.56 | 0.02  | 0.79  | 1 | 0.96     | 0.89     | 1.20E-05 | NA | NA | NA | NA |
| 0.33  | 0.03  | 0     | 0     | 1 | 1        | 1        | 1        | NA | NA | NA | NA |
| -0.02 | 0.1   | -0.08 | -0.12 | 1 | 1        | 0.045    | 1.00E-04 | NA | NA | NA | NA |
| 0     | NA    | -0.49 | 0.37  | 1 | NA       | 0.0044   | 0.75     | NA | NA | NA | NA |
| 0.08  | 0.02  | -0.08 | 0.2   | 1 | 1        | 0.081    | 0.0078   | NA | NA | NA | NA |
| 0     | 0.04  | -0.01 | 0.02  | 1 | 0.13     | 0.46     | 0.25     | NA | NA | NA | NA |
| 0     | -0.03 | -0.03 | 0.12  | 1 | 0.82     | 0.36     | 0.0064   | NA | NA | NA | NA |
| 0     | -0.4  | -0.41 | -0.08 | 1 | 0.67     | 0.073    | 0.88     | NA | NA | NA | NA |
| 0     | -0.02 | 0.01  | 0.1   | 1 | 0.82     | 0.86     | 0.0036   | NA | NA | NA | NA |
| -0.25 | -0.25 | -0.08 | -0.07 | 1 | 1        | 0.16     | 0.28     | NA | NA | NA | NA |
| 0.03  | 0.06  | 0     | 0.04  | 1 | 1        | 0.98     | 0.18     | NA | NA | NA | NA |
| 0.02  | -0.01 | -0.09 | -0.05 | 1 | 1        | 9.80E-05 | 0.084    | NA | NA | NA | NA |
| 0.05  | 0.03  | -0.02 | 0.03  | 1 | 0.57     | 0.64     | 0.47     | NA | NA | NA | NA |
| 0.02  | 0.18  | -0.04 | -0.01 | 1 | 0.093    | 0.22     | 0.91     | NA | NA | NA | NA |
| -0.04 | 0.89  | 0.03  | -0.02 | 1 | 2.70E-07 | 0.48     | 0.52     | NA | NA | NA | NA |
| 0     | -0.01 | -0.07 | -0.03 | 1 | 0.61     | 1.60E-07 | 0.042    | NA | NA | NA | NA |
| 0.08  | -0.02 | -0.04 | -0.14 | 1 | 1        | 0.86     | 0.16     | NA | NA | NA | NA |
| 0     | 0.03  | 0.02  | 0.05  | 1 | 0.71     | 0.55     | 0.09     | NA | NA | NA | NA |
| 0.01  | 0.11  | -0.09 | 0     | 1 | 0.062    | 0.00055  | 0.99     | NA | NA | NA | NA |
| 0.06  | 0.03  | -0.03 | -0.06 | 1 | 0.81     | 0.47     | 0.035    | NA | NA | NA | NA |
| 0     | 0.04  | -0.05 | -0.01 | 1 | 0.33     | 3.00E-04 | 0.4      | NA | NA | NA | NA |
| 0     | -0.04 | 0.02  | 0.15  | 1 | 0.58     | 0.54     | 6.50E-05 | NA | NA | NA | NA |
| -0.1  | -0.15 | -0.13 | NA    | 1 | 0.46     | 0.023    | NA       | NA | NA | NA | NA |
| 0.06  | -0.01 | -0.05 | 0.02  | 1 | 1        | 0.017    | 0.63     | NA | NA | NA | NA |
| 0     | NA    | NA    | 0     | 1 | NA       | NA       | 1        | NA | NA | NA | NA |
| 0.01  | -0.1  | -0.03 | 0.01  | 1 | 0.23     | 0.12     | 0.73     | NA | NA | NA | NA |
| 0     | -0.12 | -0.05 | -0.01 | 1 | 0.0067   | 0.076    | 0.8      | NA | NA | NA | NA |
| -0.04 | NA    | -0.12 | -0.18 | 1 | NA       | 0.057    | 0.0057   | NA | NA | NA | NA |

|       |       |       |       |    |          |          |          |    |    |    |    |
|-------|-------|-------|-------|----|----------|----------|----------|----|----|----|----|
| 0.08  | 0.06  | -0.08 | -0.01 | 1  | 0.39     | 0.012    | 0.84     | NA | NA | NA | NA |
| 0.01  | -0.07 | -0.07 | -0.03 | 1  | 0.008    | 0.0015   | 0.32     | NA | NA | NA | NA |
| 0.01  | 0.23  | -0.06 | -0.06 | 1  | 0.02     | 0.023    | 0.0084   | NA | NA | NA | NA |
| -0.02 | -0.01 | -0.11 | -0.01 | 1  | 0.95     | 1.80E-05 | 0.94     | NA | NA | NA | NA |
| 0     | 0     | -0.02 | 0.03  | 1  | 0.99     | 0.091    | 0.055    | NA | NA | NA | NA |
| 0.06  | 0.19  | -0.02 | 0.17  | 1  | 0.95     | 0.28     | 2.20E-05 | NA | NA | NA | NA |
| NA    | NA    | -0.16 | -0.17 | NA | NA       | 0.0028   | 0.54     | NA | NA | NA | NA |
| NA    | NA    | -0.05 | 0.08  | NA | NA       | 0.23     | 0.12     | NA | NA | NA | NA |
| NA    | NA    | -0.15 | NA    | NA | NA       | 0.16     | NA       | NA | NA | NA | NA |
| NA    | 0.05  | -0.02 | 0.07  | NA | 0.66     | 0.5      | 0.11     | NA | NA | NA | NA |
| NA    | NA    | 0.02  | -0.03 | NA | NA       | 0.96     | 0.8      | NA | NA | NA | NA |
| NA    | NA    | -0.18 | NA    | NA | NA       | 0.64     | NA       | NA | NA | NA | NA |
| NA    | 0.25  | 0.4   | -0.02 | NA | 1        | 0.0029   | 1        | NA | NA | NA | NA |
| NA    | -0.25 | -0.02 | 0.13  | NA | 0.6      | 0.51     | 0.0012   | NA | NA | NA | NA |
| NA    | NA    | -0.18 | -0.07 | NA | NA       | 0.0012   | 0.29     | NA | NA | NA | NA |
| NA    | 0.03  | -0.17 | 0.08  | NA | 0.96     | 5.60E-06 | 0.31     | NA | NA | NA | NA |
| NA    | 0.35  | -0.08 | 0     | NA | 0.37     | 0.22     | 1        | NA | NA | NA | NA |
| NA    | NA    | 0.11  | NA    | NA | NA       | 0.61     | NA       | NA | NA | NA | NA |
| NA    | NA    | 0.09  | NA    | NA | NA       | 1        | NA       | NA | NA | NA | NA |
| NA    | NA    | -0.22 | -0.04 | NA | NA       | 0.051    | 0.78     | NA | NA | NA | NA |
| NA    | 0.57  | -0.1  | -0.02 | NA | 1.60E-06 | 0.13     | 0.75     | NA | NA | NA | NA |
| NA    | NA    | 0.31  | 0.33  | NA | NA       | 0.1      | 0.35     | NA | NA | NA | NA |
| NA    | NA    | -0.1  | -0.09 | NA | NA       | 0.7      | 0.24     | NA | NA | NA | NA |
| NA    | NA    | -0.16 | -0.33 | NA | NA       | 0.34     | 0.077    | NA | NA | NA | NA |
| NA    | NA    | -0.42 | -0.18 | NA | NA       | 0.0025   | 0.26     | NA | NA | NA | NA |
| NA    | -0.5  | NA    | NA    | NA | 1        | NA       | NA       | NA | NA | NA | NA |
| NA    | 0.04  | 0     | 0     | NA | 0.79     | 1        | 1        | NA | NA | NA | NA |
| NA    | 0.08  | -0.08 | -0.01 | NA | 1        | 0.27     | 1        | NA | NA | NA | NA |
| NA    | NA    | NA    | NA    | NA | NA       | NA       | NA       | NA | NA | NA | NA |
| NA    | NA    | -0.01 | 0.04  | NA | NA       | 0.99     | 0.28     | NA | NA | NA | NA |

|    |       |       |       |    |          |          |          |    |    |    |    |
|----|-------|-------|-------|----|----------|----------|----------|----|----|----|----|
| NA | 0.17  | -0.02 | 0.16  | NA | 0.65     | 0.63     | 7.80E-07 | NA | NA | NA | NA |
| NA | NA    | -0.07 | -0.11 | NA | NA       | 0.56     | 0.42     | NA | NA | NA | NA |
| NA | 0.15  | -0.03 | -0.1  | NA | 0.042    | 0.57     | 0.037    | NA | NA | NA | NA |
| NA | NA    | 0.05  | -0.02 | NA | NA       | 0.75     | 0.97     | NA | NA | NA | NA |
| NA | NA    | -0.19 | -0.12 | NA | NA       | 0.0016   | 0.52     | NA | NA | NA | NA |
| NA | 0.09  | -0.09 | 0.01  | NA | 0.49     | 0.035    | 0.83     | NA | NA | NA | NA |
| NA | 0.48  | -0.03 | 0.21  | NA | 1.40E-07 | 0.45     | 3.80E-05 | NA | NA | NA | NA |
| NA | NA    | -0.09 | -0.13 | NA | NA       | 0.22     | 0.075    | NA | NA | NA | NA |
| NA | 0.04  | NA    | NA    | NA | 1        | NA       | NA       | NA | NA | NA | NA |
| NA | 0.3   | 0.04  | 0.32  | NA | 0.068    | 0.5      | 0.061    | NA | NA | NA | NA |
| NA | NA    | NA    | NA    | NA | NA       | NA       | NA       | NA | NA | NA | NA |
| NA | NA    | -0.18 | 0.15  | NA | NA       | 0.5      | 0.4      | NA | NA | NA | NA |
| NA | NA    | -0.05 | 0.06  | NA | NA       | 0.9      | 0.66     | NA | NA | NA | NA |
| NA | 0.06  | -0.16 | -0.11 | NA | 0.19     | 1.70E-05 | 0.0078   | NA | NA | NA | NA |
| NA | NA    | NA    | NA    | NA | NA       | NA       | NA       | NA | NA | NA | NA |
| NA | NA    | -0.6  | NA    | NA | NA       | 0.95     | NA       | NA | NA | NA | NA |
| NA | NA    | NA    | NA    | NA | NA       | NA       | NA       | NA | NA | NA | NA |
| NA | 0.03  | -0.03 | 0.02  | NA | 0.92     | 0.17     | 0.47     | NA | NA | NA | NA |
| NA | 0.32  | -0.03 | 0.05  | NA | 0.15     | 0.37     | 0.19     | NA | NA | NA | NA |
| NA | NA    | NA    | NA    | NA | NA       | NA       | NA       | NA | NA | NA | NA |
| NA | 0.56  | 0.02  | 0.08  | NA | 0.0057   | 1        | 0.25     | NA | NA | NA | NA |
| NA | NA    | -0.16 | 0.01  | NA | NA       | 0.00017  | 1        | NA | NA | NA | NA |
| NA | NA    | -0.15 | -0.08 | NA | NA       | 0.0056   | 0.27     | NA | NA | NA | NA |
| NA | NA    | 0.01  | -0.06 | NA | NA       | 1        | 0.36     | NA | NA | NA | NA |
| NA | 0.12  | 0.03  | 0.23  | NA | 0.0016   | 0.57     | 1.70E-06 | NA | NA | NA | NA |
| NA | NA    | -0.04 | 0.03  | NA | NA       | 0.4      | 0.54     | NA | NA | NA | NA |
| NA | 0.09  | -0.07 | 0.03  | NA | 1        | 0.11     | 0.51     | NA | NA | NA | NA |
| NA | 0.03  | -0.05 | 0     | NA | 0.69     | 0.073    | 1        | NA | NA | NA | NA |
| NA | -0.09 | -0.03 | 0.35  | NA | 1        | 0.53     | 8.00E-04 | NA | NA | NA | NA |
| NA | 0.07  | -0.01 | 0.05  | NA | 0.67     | 0.98     | 0.45     | NA | NA | NA | NA |

|    |       |       |       |    |      |         |        |    |    |    |    |
|----|-------|-------|-------|----|------|---------|--------|----|----|----|----|
| NA | NA    | NA    | NA    | NA | NA   | NA      | NA     | NA | NA | NA | NA |
| NA | NA    | -0.8  | -0.5  | NA | NA   | 0.053   | 0.16   | NA | NA | NA | NA |
| NA | NA    | NA    | NA    | NA | NA   | NA      | NA     | NA | NA | NA | NA |
| NA | -0.07 | -0.06 | -0.04 | NA | 0.39 | 0.1     | 0.29   | NA | NA | NA | NA |
| NA | NA    | -0.1  | -0.13 | NA | NA   | 1       | 1      | NA | NA | NA | NA |
| NA | -0.09 | -0.08 | 0.03  | NA | 0.17 | 0.085   | 0.62   | NA | NA | NA | NA |
| NA | NA    | -0.03 | 0.03  | NA | NA   | 0.62    | 0.54   | NA | NA | NA | NA |
| NA | 0     | 0.01  | NA    | NA | 1    | 1       | NA     | NA | NA | NA | NA |
| NA | 0.04  | -0.05 | 0.08  | NA | 0.66 | 0.0042  | 0.0037 | NA | NA | NA | NA |
| NA | NA    | NA    | NA    | NA | NA   | NA      | NA     | NA | NA | NA | NA |
| NA | -0.88 | -0.05 | 0.28  | NA | 0.31 | 0.51    | 0.32   | NA | NA | NA | NA |
| NA | NA    | 0     | NA    | NA | NA   | 1       | NA     | NA | NA | NA | NA |
| NA | NA    | 0.03  | 0.16  | NA | NA   | 0.33    | 0.024  | NA | NA | NA | NA |
| NA | NA    | -0.12 | 0.01  | NA | NA   | 0.52    | 1      | NA | NA | NA | NA |
| NA | NA    | 0     | NA    | NA | NA   | 1       | NA     | NA | NA | NA | NA |
| NA | 0.03  | -0.05 | -0.04 | NA | 0.72 | 0.047   | 0.14   | NA | NA | NA | NA |
| NA | NA    | -0.2  | NA    | NA | NA   | 0.79    | NA     | NA | NA | NA | NA |
| NA | NA    | NA    | NA    | NA | NA   | NA      | NA     | NA | NA | NA | NA |
| NA | NA    | -0.07 | NA    | NA | NA   | 0.21    | NA     | NA | NA | NA | NA |
| NA | NA    | NA    | NA    | NA | NA   | NA      | NA     | NA | NA | NA | NA |
| NA | NA    | 0     | -0.04 | NA | NA   | 1       | 0.65   | NA | NA | NA | NA |
| NA | NA    | 0.01  | -0.01 | NA | NA   | 0.93    | 1      | NA | NA | NA | NA |
| NA | NA    | 0     | 0     | NA | NA   | 1       | 1      | NA | NA | NA | NA |
| NA | 0.02  | -0.02 | 0     | NA | 1    | 0.83    | 1      | NA | NA | NA | NA |
| NA | NA    | -0.08 | -0.07 | NA | NA   | 0.1     | 0.071  | NA | NA | NA | NA |
| NA | NA    | 0.05  | 0.01  | NA | NA   | 0.51    | 1      | NA | NA | NA | NA |
| NA | NA    | -0.11 | -0.03 | NA | NA   | 0.00011 | 0.44   | NA | NA | NA | NA |
| NA | NA    | NA    | NA    | NA | NA   | NA      | NA     | NA | NA | NA | NA |
| NA | NA    | -0.23 | NA    | NA | NA   | 0.00013 | NA     | NA | NA | NA | NA |
| NA | NA    | 0.02  | 0.01  | NA | NA   | 0.65    | 1      | NA | NA | NA | NA |

|       |       |       |       |          |          |          |          |    |    |    |    |
|-------|-------|-------|-------|----------|----------|----------|----------|----|----|----|----|
| NA    | NA    | -0.04 | 0.04  | NA       | NA       | 0.9      | 0.4      | NA | NA | NA | NA |
| NA    | NA    | 0.1   | NA    | NA       | NA       | 0.38     | NA       | NA | NA | NA | NA |
| NA    | NA    | -0.09 | NA    | NA       | NA       | 0.79     | NA       | NA | NA | NA | NA |
| NA    | NA    | NA    | NA    | NA       | NA       | NA       | NA       | NA | NA | NA | NA |
| NA    | 0.59  | -0.06 | 0.02  | NA       | 0.023    | 0.59     | 0.91     | NA | NA | NA | NA |
| NA    | 0.13  | NA    | NA    | NA       | 1        | NA       | NA       | NA | NA | NA | NA |
| NA    | 0.06  | -0.1  | -0.03 | NA       | 0.23     | 0.00032  | 0.49     | NA | NA | NA | NA |
| NA    | NA    | NA    | NA    | NA       | NA       | NA       | NA       | NA | NA | NA | NA |
| NA    | NA    | 0.5   | NA    | NA       | NA       | 0.6      | NA       | NA | NA | NA | NA |
| 0.6   | 0.05  | -0.05 | 0.01  | 1.70E-09 | 0.25     | 0.086    | 0.84     | NA | NA | NA | NA |
| 0.84  | 0.1   | -0.14 | -0.03 | 6.70E-09 | 0.24     | 1.50E-09 | 0.53     | NA | NA | NA | NA |
| 0.2   | 0.14  | -0.13 | -0.07 | 8.80E-09 | 8.40E-06 | 1.10E-06 | 0.015    | NA | NA | NA | NA |
| 0.26  | 0.06  | 0.01  | 0.05  | 9.10E-09 | 0.031    | 0.54     | 0.00038  | NA | NA | NA | NA |
| 0.7   | 0.17  | -0.1  | 0.19  | 1.40E-08 | 0.032    | 0.21     | 0.16     | NA | NA | NA | NA |
| 0.4   | 0.13  | 0.01  | 0.05  | 2.40E-08 | 0.085    | 0.87     | 0.026    | NA | NA | NA | NA |
| 0.43  | 0.19  | -0.06 | 0.03  | 2.90E-08 | 0.0094   | 0.0014   | 0.089    | NA | NA | NA | NA |
| 0.09  | 0.01  | 0     | 0.04  | 2.00E-07 | 0.41     | 0.89     | 0.00086  | NA | NA | NA | NA |
| 0.85  | 0.01  | -0.01 | 0.01  | 2.30E-07 | 1        | 0.68     | 0.51     | NA | NA | NA | NA |
| -0.4  | -0.39 | -0.03 | 0.01  | 5.10E-07 | 1.60E-06 | 0.29     | 0.68     | NA | NA | NA | NA |
| 0.13  | 0.01  | -0.06 | -0.02 | 6.80E-07 | 0.49     | 2.40E-08 | 0.11     | NA | NA | NA | NA |
| -0.17 | -0.12 | 0     | 0.06  | 7.70E-07 | 0.00073  | 0.83     | 5.50E-06 | NA | NA | NA | NA |
| 0.41  | 0.38  | -0.1  | -0.03 | 1.20E-06 | 5.40E-05 | 0.00041  | 0.45     | NA | NA | NA | NA |
| -0.22 | 0.12  | 0     | 0.03  | 1.30E-06 | 0.017    | 0.97     | 0.24     | NA | NA | NA | NA |
| 0.44  | -0.01 | 0.02  | 0.04  | 1.60E-06 | 0.9      | 0.58     | 0.071    | NA | NA | NA | NA |
| 0.3   | 0.1   | -0.12 | -0.11 | 3.20E-06 | 0.018    | 3.10E-09 | 4.40E-07 | NA | NA | NA | NA |
| -0.45 | -0.25 | -0.06 | -0.01 | 5.90E-06 | 0.017    | 0.024    | 0.82     | NA | NA | NA | NA |
| -0.26 | -0.04 | 0.03  | 0.07  | 6.70E-06 | 0.72     | 0.27     | 0.013    | NA | NA | NA | NA |
| 0.17  | -0.01 | -0.06 | -0.04 | 9.30E-06 | 0.89     | 0.00012  | 0.027    | NA | NA | NA | NA |
| 0.49  | -0.02 | -0.04 | 0.02  | 1.10E-05 | 0.79     | 0.13     | 0.57     | NA | NA | NA | NA |
| 0.09  | 0.06  | -0.02 | 0.02  | 1.40E-05 | 6.20E-05 | 0.11     | 0.2      | NA | NA | NA | NA |

|       |       |       |       |          |          |          |          |    |    |    |    |
|-------|-------|-------|-------|----------|----------|----------|----------|----|----|----|----|
| 0.26  | 0.16  | -0.07 | -0.05 | 2.10E-05 | 0.0015   | 0.0084   | 0.1      | NA | NA | NA | NA |
| 0.35  | 0.05  | -0.05 | -0.06 | 2.40E-05 | 0.47     | 0.11     | 0.066    | NA | NA | NA | NA |
| 0.11  | 0.11  | -0.03 | -0.01 | 2.50E-05 | 1.00E-04 | 0.018    | 0.63     | NA | NA | NA | NA |
| 0.38  | -0.06 | -0.06 | -0.06 | 2.70E-05 | 0.45     | 0.1      | 0.026    | NA | NA | NA | NA |
| 0.37  | 0.1   | -0.13 | -0.1  | 3.00E-05 | 0.082    | 6.10E-08 | 5.60E-05 | NA | NA | NA | NA |
| 0.17  | 0.2   | -0.07 | -0.06 | 4.40E-05 | 2.20E-05 | 1.00E-04 | 0.0064   | NA | NA | NA | NA |
| 0.2   | 0.06  | -0.04 | 0.01  | 6.50E-05 | 0.18     | 0.0051   | 0.51     | NA | NA | NA | NA |
| 0.13  | 0.09  | -0.06 | -0.03 | 9.80E-05 | 0.02     | 0.0034   | 0.24     | NA | NA | NA | NA |
| 0.16  | 0.09  | -0.02 | 0.01  | 0.00011  | 0.00023  | 0.22     | 0.51     | NA | NA | NA | NA |
| -0.22 | -0.25 | -0.07 | -0.05 | 0.00012  | 0.011    | 0.00082  | 0.056    | NA | NA | NA | NA |
| 0.21  | 0.11  | -0.06 | 0     | 0.00013  | 0.07     | 0.038    | 1        | NA | NA | NA | NA |
| 0.12  | 0.07  | -0.04 | -0.01 | 0.00015  | 0.038    | 0.0013   | 0.43     | NA | NA | NA | NA |
| 0.37  | 0.25  | -0.05 | 0.03  | 0.00019  | 0.044    | 0.12     | 0.44     | NA | NA | NA | NA |
| 0.29  | 0.11  | -0.1  | -0.03 | 2.00E-04 | 0.078    | 0.00018  | 0.37     | NA | NA | NA | NA |
| 0.23  | 0.14  | -0.05 | -0.01 | 0.00025  | 0.0044   | 0.002    | 0.61     | NA | NA | NA | NA |
| -0.15 | -0.16 | -0.08 | 0.05  | 0.00025  | 0.0047   | 4.20E-05 | 0.04     | NA | NA | NA | NA |
| 0.11  | 0.2   | 0     | 0.04  | 0.00027  | 2.10E-09 | 0.86     | 0.057    | NA | NA | NA | NA |
| 0.11  | 0.17  | -0.05 | -0.02 | 0.00035  | 4.80E-07 | 0.00071  | 0.21     | NA | NA | NA | NA |
| 0.1   | 0.07  | -0.03 | -0.01 | 0.00036  | 0.031    | 0.024    | 0.38     | NA | NA | NA | NA |
| 0.28  | -0.02 | -0.05 | -0.03 | 0.00058  | 0.84     | 0.027    | 0.12     | NA | NA | NA | NA |
| 0.1   | 0.08  | 0.02  | 0.04  | 0.00074  | 0.0067   | 0.55     | 0.085    | NA | NA | NA | NA |
| 0.1   | 0.01  | -0.03 | 0.01  | 0.00078  | 0.8      | 0.015    | 0.54     | NA | NA | NA | NA |
| 0.16  | 0.06  | -0.04 | 0.02  | 0.00078  | 0.11     | 0.041    | 0.4      | NA | NA | NA | NA |
| -0.12 | 0.02  | -0.09 | 0     | 8.00E-04 | 0.62     | 0.0036   | 1        | NA | NA | NA | NA |
| 0.58  | 0.09  | -0.01 | 0.06  | 0.00087  | 0.24     | 0.52     | 0.015    | NA | NA | NA | NA |
| 0.14  | -0.01 | -0.06 | -0.04 | 9.00E-04 | 0.84     | 0.00073  | 0.033    | NA | NA | NA | NA |
| 0.31  | 0.07  | 0.03  | 0.01  | 0.00093  | 0.041    | 0.27     | 0.65     | NA | NA | NA | NA |
| 0.14  | 0.2   | 0.01  | 0.03  | 0.001    | 2.00E-08 | 0.78     | 0.075    | NA | NA | NA | NA |
| 0.09  | 0.03  | -0.03 | 0.01  | 0.0012   | 0.14     | 0.11     | 0.43     | NA | NA | NA | NA |
| 0.29  | 0.2   | -0.13 | -0.08 | 0.0013   | 0.0015   | 0.00012  | 0.055    | NA | NA | NA | NA |



|       |       |       |       |        |          |          |          |    |    |    |    |
|-------|-------|-------|-------|--------|----------|----------|----------|----|----|----|----|
| 0.08  | 0.07  | -0.02 | 0.05  | 0.0014 | 0.0049   | 0.16     | 5.00E-04 | NA | NA | NA | NA |
| 0.16  | -0.03 | -0.08 | 0.02  | 0.0014 | 0.28     | 0.0018   | 0.59     | NA | NA | NA | NA |
| 0.64  | 0.1   | -0.07 | 0.09  | 0.0017 | 0.066    | 0.1      | 0.093    | NA | NA | NA | NA |
| 0.17  | 0.08  | -0.01 | 0.01  | 0.002  | 0.052    | 0.82     | 0.75     | NA | NA | NA | NA |
| 0.23  | 0.16  | -0.08 | -0.1  | 0.002  | 0.013    | 0.15     | 0.084    | NA | NA | NA | NA |
| 0.1   | 0.19  | -0.02 | 0.03  | 0.0022 | 1.00E-09 | 0.24     | 0.062    | NA | NA | NA | NA |
| 0.8   | 0.13  | -0.1  | -0.01 | 0.0023 | 0.67     | 0.022    | 0.93     | NA | NA | NA | NA |
| 0.07  | 0.04  | -0.03 | -0.01 | 0.0023 | 0.017    | 0.028    | 0.61     | NA | NA | NA | NA |
| 0.4   | 0.08  | 0.09  | 0.05  | 0.0024 | 0.48     | 0.014    | 0.17     | NA | NA | NA | NA |
| 0.44  | 0.05  | -0.12 | 0.3   | 0.0025 | 0.76     | 2.90E-05 | 4.20E-06 | NA | NA | NA | NA |
| -0.67 | -0.17 | 0.03  | 0.37  | 0.0034 | 1        | 0.53     | 2.20E-07 | NA | NA | NA | NA |
| 0.44  | 0.31  | -0.04 | 0.08  | 0.0034 | 0.00095  | 0.075    | 0.0073   | NA | NA | NA | NA |
| 0.12  | 0.03  | -0.05 | -0.06 | 0.0042 | 0.43     | 0.026    | 0.0078   | NA | NA | NA | NA |
| 0.19  | 0.08  | -0.06 | -0.03 | 0.0054 | 0.29     | 0.023    | 0.27     | NA | NA | NA | NA |
| -0.14 | -0.13 | -0.06 | -0.05 | 0.0054 | 2.50E-05 | 3.00E-04 | 0.0026   | NA | NA | NA | NA |
| 0.17  | 0.11  | -0.04 | 0.04  | 0.0062 | 0.0087   | 0.042    | 0.067    | NA | NA | NA | NA |
| 0.74  | 0.04  | -0.01 | 0.01  | 0.0062 | 0.82     | 0.66     | 0.85     | NA | NA | NA | NA |
| 0.1   | 0.05  | -0.01 | 0.01  | 0.0062 | 0.29     | 0.43     | 0.46     | NA | NA | NA | NA |
| 0.07  | -0.01 | -0.01 | 0.02  | 0.0063 | 0.62     | 0.25     | 0.13     | NA | NA | NA | NA |
| 0.32  | 0.15  | -0.04 | -0.01 | 0.0063 | 0.26     | 0.089    | 0.9      | NA | NA | NA | NA |
| 0.06  | 0.11  | 0.01  | 0.01  | 0.0064 | 1.50E-05 | 0.61     | 0.46     | NA | NA | NA | NA |
| 0.24  | 0.04  | -0.05 | 0.03  | 0.0064 | 0.24     | 0.0023   | 0.085    | NA | NA | NA | NA |
| -0.25 | 0.16  | 0     | 0.11  | 0.0065 | 0.29     | 1        | 0.0025   | NA | NA | NA | NA |
| 0.13  | 0.12  | -0.01 | 0.03  | 0.0067 | 0.017    | 0.83     | 0.15     | NA | NA | NA | NA |
| 0.06  | 0.11  | -0.04 | 0.01  | 0.0069 | 3.00E-07 | 0.0037   | 0.51     | NA | NA | NA | NA |
| 0.07  | 0.02  | -0.06 | 0.02  | 0.007  | 0.31     | 0.0015   | 0.38     | NA | NA | NA | NA |
| 0.24  | -0.03 | -0.05 | -0.01 | 0.0073 | 0.59     | 0.072    | 0.69     | NA | NA | NA | NA |
| 0.14  | 0.06  | 0.01  | 0.02  | 0.008  | 0.15     | 0.86     | 0.34     | NA | NA | NA | NA |
| 0.07  | -0.01 | -0.01 | 0.03  | 0.0082 | 0.61     | 0.69     | 0.041    | NA | NA | NA | NA |
| 0.11  | 0.03  | -0.04 | 0.01  | 0.0085 | 0.43     | 0.086    | 0.64     | NA | NA | NA | NA |

|       |       |       |       |        |          |          |          |    |    |    |    |
|-------|-------|-------|-------|--------|----------|----------|----------|----|----|----|----|
| 0.07  | -0.02 | -0.03 | 0.01  | 0.0095 | 0.94     | 0.15     | 0.85     | NA | NA | NA | NA |
| 0.17  | 0.15  | -0.03 | 0.02  | 0.0099 | 0.0068   | 0.29     | 0.41     | NA | NA | NA | NA |
| 0.27  | 0.13  | 0     | 0.04  | 0.01   | 0.0062   | 1        | 0.13     | NA | NA | NA | NA |
| 0.51  | -0.01 | -0.06 | 0.01  | 0.01   | 1        | 0.082    | 1        | NA | NA | NA | NA |
| -0.37 | NA    | 0.03  | 0.66  | 0.011  | NA       | 0.82     | 8.00E-04 | NA | NA | NA | NA |
| 0.21  | 0.34  | -0.04 | -0.01 | 0.011  | 0.28     | 0.4      | 1        | NA | NA | NA | NA |
| 0.1   | 0.14  | -0.04 | -0.02 | 0.011  | 0.00015  | 0.053    | 0.41     | NA | NA | NA | NA |
| 0.12  | 0.16  | -0.04 | 0     | 0.011  | 0.0031   | 0.22     | 1        | NA | NA | NA | NA |
| -0.13 | 0.02  | -0.09 | -0.04 | 0.014  | 0.9      | 0.0017   | 0.34     | NA | NA | NA | NA |
| 0.09  | 0.07  | -0.07 | 0     | 0.014  | 0.051    | 0.0066   | 0.96     | NA | NA | NA | NA |
| 0.05  | 0.02  | -0.01 | 0.02  | 0.014  | 0.13     | 0.33     | 0.019    | NA | NA | NA | NA |
| 0.06  | 0.08  | -0.05 | 0     | 0.015  | 0.00056  | 2.40E-06 | 0.86     | NA | NA | NA | NA |
| 0.07  | 0.19  | -0.02 | 0.05  | 0.016  | 0.0015   | 0.21     | 0.0036   | NA | NA | NA | NA |
| 0.14  | 0.05  | -0.06 | -0.01 | 0.017  | 0.13     | 0.0037   | 0.65     | NA | NA | NA | NA |
| 0.11  | -0.04 | -0.08 | -0.02 | 0.017  | 0.16     | 3.70E-05 | 0.37     | NA | NA | NA | NA |
| -0.17 | -0.01 | 0.05  | 0.05  | 0.019  | 0.99     | 0.085    | 0.032    | NA | NA | NA | NA |
| -0.13 | -0.01 | 0.01  | 0.03  | 0.019  | 1        | 0.75     | 0.098    | NA | NA | NA | NA |
| 0.07  | 0.01  | -0.08 | -0.05 | 0.019  | 0.66     | 4.90E-09 | 0.0028   | NA | NA | NA | NA |
| 0.08  | 0.06  | -0.04 | -0.01 | 0.023  | 0.0074   | 0.015    | 0.76     | NA | NA | NA | NA |
| 0.04  | 0.03  | -0.05 | -0.02 | 0.024  | 0.12     | 0.0035   | 0.25     | NA | NA | NA | NA |
| 0.28  | -0.09 | -0.06 | -0.02 | 0.024  | 0.049    | 0.014    | 0.5      | NA | NA | NA | NA |
| 0.2   | 0.04  | 0.01  | 0.05  | 0.025  | 0.92     | 0.79     | 0.059    | NA | NA | NA | NA |
| 0.06  | 0.18  | -0.03 | 0.04  | 0.028  | 3.30E-06 | 0.13     | 0.11     | NA | NA | NA | NA |
| 0.07  | 0.14  | -0.1  | 0.06  | 0.03   | 0.026    | 8.00E-05 | 0.071    | NA | NA | NA | NA |
| -0.04 | 0     | -0.04 | 0.04  | 0.03   | 0.94     | 0.0029   | 0.012    | NA | NA | NA | NA |
| -0.05 | -0.03 | -0.01 | 0.05  | 0.032  | 0.29     | 0.65     | 0.00037  | NA | NA | NA | NA |
| 0.09  | -0.02 | -0.02 | 0     | 0.032  | 0.84     | 0.33     | 0.93     | NA | NA | NA | NA |
| 0.09  | 0.09  | -0.01 | -0.01 | 0.032  | 0.015    | 0.84     | 0.9      | NA | NA | NA | NA |
| 0.23  | 0.2   | 0.06  | 0.1   | 0.032  | 0.00049  | 0.019    | 0.0055   | NA | NA | NA | NA |
| 0.2   | 0.02  | 0     | -0.03 | 0.032  | 0.94     | 1        | 0.59     | NA | NA | NA | NA |

|       |       |       |       |       |          |          |       |    |    |    |    |
|-------|-------|-------|-------|-------|----------|----------|-------|----|----|----|----|
| -0.11 | -0.05 | -0.01 | 0.03  | 0.033 | 0.67     | 0.53     | 0.094 | NA | NA | NA | NA |
| -0.06 | -0.05 | -0.04 | 0.06  | 0.033 | 0.074    | 0.045    | 0.004 | NA | NA | NA | NA |
| 0.11  | 0.08  | -0.06 | 0     | 0.034 | 0.017    | 0.019    | 0.99  | NA | NA | NA | NA |
| 0.66  | -0.12 | -0.04 | 0.01  | 0.034 | 0.36     | 0.31     | 0.95  | NA | NA | NA | NA |
| 0.07  | 0.07  | -0.03 | 0.02  | 0.034 | 0.0014   | 0.021    | 0.17  | NA | NA | NA | NA |
| 0.07  | 0.17  | 0.01  | 0.02  | 0.035 | 9.10E-08 | 0.68     | 0.36  | NA | NA | NA | NA |
| 0.31  | 0.28  | -0.05 | -0.04 | 0.036 | 0.06     | 0.47     | 0.55  | NA | NA | NA | NA |
| 0.05  | 0.03  | -0.01 | 0.03  | 0.037 | 0.2      | 0.62     | 0.022 | NA | NA | NA | NA |
| 0.04  | 0.03  | -0.05 | -0.01 | 0.038 | 0.19     | 7.60E-06 | 0.31  | NA | NA | NA | NA |
| 0.06  | 0.06  | -0.01 | -0.01 | 0.042 | 0.026    | 0.59     | 0.88  | NA | NA | NA | NA |
| 0.2   | 0.48  | -0.03 | 0.23  | 0.043 | 4.30E-05 | 0.68     | 0.046 | NA | NA | NA | NA |
| 0.11  | -0.03 | -0.04 | 0.01  | 0.044 | 0.18     | 0.0024   | 0.61  | NA | NA | NA | NA |
| -0.13 | 0.07  | -0.04 | 0     | 0.045 | 0.17     | 0.0092   | 0.94  | NA | NA | NA | NA |
| 0.13  | 0.06  | -0.03 | 0.01  | 0.046 | 0.081    | 0.06     | 0.82  | NA | NA | NA | NA |
| 0.08  | -0.03 | -0.07 | -0.04 | 0.046 | 0.25     | 2.60E-05 | 0.05  | NA | NA | NA | NA |
| 0.11  | 0.03  | -0.03 | 0.04  | 0.048 | 0.38     | 0.11     | 0.05  | NA | NA | NA | NA |
| 0.22  | 0.28  | -0.03 | 0.06  | 0.048 | 6.00E-05 | 0.17     | 0.023 | NA | NA | NA | NA |
| 0.07  | 0.01  | -0.01 | 0.01  | 0.049 | 0.83     | 0.53     | 0.74  | NA | NA | NA | NA |
| 0.06  | 0.04  | -0.03 | 0     | 0.052 | 0.1      | 0.085    | 0.98  | NA | NA | NA | NA |
| 0.23  | 0.31  | 0     | 0.03  | 0.054 | 0.00063  | 1        | 0.46  | NA | NA | NA | NA |
| 0.34  | 0.14  | -0.04 | -0.01 | 0.055 | 0.53     | 0.12     | 0.7   | NA | NA | NA | NA |
| 0.27  | 0.01  | -0.07 | 0     | 0.057 | 1        | 0.022    | 0.98  | NA | NA | NA | NA |
| 0.19  | 0.19  | 0.1   | 0.01  | 0.062 | 0.35     | 0.03     | 0.85  | NA | NA | NA | NA |
| -0.05 | -0.03 | -0.02 | 0     | 0.063 | 0.32     | 0.028    | 0.76  | NA | NA | NA | NA |
| -0.24 | -0.32 | -0.04 | -0.01 | 0.065 | 1.20E-05 | 0.11     | 0.93  | NA | NA | NA | NA |
| 0.08  | 0.01  | -0.05 | -0.01 | 0.067 | 0.82     | 0.00075  | 0.76  | NA | NA | NA | NA |
| 0.05  | 0.08  | -0.02 | 0.03  | 0.068 | 4.00E-05 | 0.048    | 0.01  | NA | NA | NA | NA |
| 0.05  | -0.01 | 0     | 0.03  | 0.069 | 0.68     | 1        | 0.044 | NA | NA | NA | NA |
| 0.12  | 0.09  | 0.01  | 0.04  | 0.075 | 0.21     | 0.67     | 0.14  | NA | NA | NA | NA |
| 0.12  | NA    | -0.06 | 0.04  | 0.075 | NA       | 0.034    | 0.15  | NA | NA | NA | NA |

|       |       |       |       |       |          |          |          |    |    |    |    |
|-------|-------|-------|-------|-------|----------|----------|----------|----|----|----|----|
| 0.14  | 0.08  | 0     | 0.01  | 0.076 | 0.23     | 1        | 0.61     | NA | NA | NA | NA |
| 0.05  | 0.09  | -0.03 | 0.01  | 0.077 | 5.50E-06 | 0.06     | 0.41     | NA | NA | NA | NA |
| 0.03  | 0.07  | -0.03 | -0.02 | 0.077 | 3.50E-05 | 0.17     | 0.13     | NA | NA | NA | NA |
| 0.08  | -0.06 | 0.02  | 0.06  | 0.079 | 0.0084   | 0.35     | 0.00053  | NA | NA | NA | NA |
| 0.09  | 0.09  | 0.05  | 0.07  | 0.079 | 0.088    | 0.4      | 0.2      | NA | NA | NA | NA |
| 0.03  | 0.02  | 0     | 0.04  | 0.081 | 0.081    | 0.69     | 1.90E-06 | NA | NA | NA | NA |
| 0.15  | -0.04 | 0.02  | 0.06  | 0.083 | 0.63     | 0.26     | 0.0024   | NA | NA | NA | NA |
| -0.14 | 0.05  | 0.04  | 0.09  | 0.086 | 1        | 0.11     | 5.60E-05 | NA | NA | NA | NA |
| 0.06  | 0.08  | -0.02 | 0.04  | 0.087 | 0.0087   | 0.13     | 0.0041   | NA | NA | NA | NA |
| 0.07  | 0.02  | -0.06 | 0     | 0.088 | 0.85     | 0.002    | 0.96     | NA | NA | NA | NA |
| 0.14  | 0.05  | 0     | -0.06 | 0.093 | 0.18     | 0.97     | 0.0099   | NA | NA | NA | NA |
| 0.43  | 0.1   | -0.05 | 0.09  | 0.094 | 0.93     | 0.27     | 0.034    | NA | NA | NA | NA |
| 0.06  | 0.22  | -0.02 | -0.02 | 0.095 | 9.60E-05 | 0.24     | 0.35     | NA | NA | NA | NA |
| 0.07  | 0.03  | -0.07 | 0.02  | 0.095 | 0.54     | 0.0013   | 0.43     | NA | NA | NA | NA |
| -0.19 | -0.06 | -0.04 | 0.01  | 0.097 | 0.79     | 0.24     | 0.81     | NA | NA | NA | NA |
| 0.21  | 0.15  | 0     | -0.03 | 0.1   | 0.073    | 1        | 0.39     | NA | NA | NA | NA |
| 0.03  | 0.04  | 0.02  | 0.05  | 0.1   | 0.019    | 0.13     | 0.00038  | NA | NA | NA | NA |
| 0.04  | 0.09  | -0.03 | 0.01  | 0.11  | 3.10E-06 | 0.033    | 0.46     | NA | NA | NA | NA |
| 0.13  | 0.08  | -0.01 | 0     | 0.11  | 0.37     | 0.97     | 1        | NA | NA | NA | NA |
| 0.12  | 0.25  | -0.05 | 0.02  | 0.11  | 1.10E-05 | 0.18     | 0.54     | NA | NA | NA | NA |
| -0.43 | 0.08  | -0.13 | -0.19 | 0.11  | 1        | 0.15     | 0.0033   | NA | NA | NA | NA |
| 0.14  | 0.08  | -0.01 | 0.02  | 0.11  | 0.26     | 0.45     | 0.25     | NA | NA | NA | NA |
| 0.05  | 0.01  | -0.03 | 0.04  | 0.11  | 0.79     | 0.018    | 0.034    | NA | NA | NA | NA |
| 0.1   | 0.11  | -0.05 | 0.02  | 0.11  | 0.0075   | 0.027    | 0.38     | NA | NA | NA | NA |
| 0.05  | -0.01 | -0.06 | 0     | 0.11  | 0.61     | 5.40E-07 | 0.92     | NA | NA | NA | NA |
| -0.1  | -0.09 | 0.01  | 0.05  | 0.12  | 0.23     | 0.88     | 0.28     | NA | NA | NA | NA |
| -0.17 | -0.18 | 0.03  | 0.02  | 0.12  | 0.09     | 0.34     | 0.61     | NA | NA | NA | NA |
| 0.04  | 0.06  | -0.03 | 0     | 0.12  | 0.0095   | 0.035    | 1        | NA | NA | NA | NA |
| 0.08  | 0.13  | -0.04 | 0     | 0.12  | 0.029    | 0.14     | 0.96     | NA | NA | NA | NA |
| 0.04  | 0.04  | -0.04 | 0.03  | 0.12  | 0.12     | 0.015    | 0.17     | NA | NA | NA | NA |

|       |       |       |       |      |          |          |          |    |    |    |    |
|-------|-------|-------|-------|------|----------|----------|----------|----|----|----|----|
| 0.1   | 0.15  | -0.01 | 0.04  | 0.12 | 0.015    | 0.87     | 0.12     | NA | NA | NA | NA |
| 0.1   | -0.05 | -0.17 | -0.08 | 0.12 | 0.65     | 0.022    | 0.25     | NA | NA | NA | NA |
| 0.08  | 0.1   | 0.01  | 0.09  | 0.13 | 0.059    | 0.39     | 1.10E-07 | NA | NA | NA | NA |
| 0.18  | 0.07  | -0.04 | -0.02 | 0.14 | 0.13     | 0.066    | 0.29     | NA | NA | NA | NA |
| 0.07  | 0.06  | -0.04 | 0.05  | 0.14 | 0.16     | 0.026    | 0.0058   | NA | NA | NA | NA |
| -0.04 | 0.11  | 0     | 0.03  | 0.14 | 0.01     | 0.93     | 0.23     | NA | NA | NA | NA |
| 0.12  | 0.17  | -0.03 | 0.14  | 0.14 | 0.024    | 0.41     | 0.0074   | NA | NA | NA | NA |
| 0.19  | 0.23  | -0.07 | -0.15 | 0.14 | 0.098    | 0.58     | 0.14     | NA | NA | NA | NA |
| 0.06  | -0.02 | -0.01 | 0     | 0.14 | 0.73     | 0.71     | 0.85     | NA | NA | NA | NA |
| -0.1  | -0.11 | -0.02 | 0.08  | 0.14 | 0.12     | 0.49     | 0.0037   | NA | NA | NA | NA |
| 0.06  | 0.02  | -0.03 | -0.02 | 0.14 | 0.83     | 0.27     | 0.43     | NA | NA | NA | NA |
| -0.04 | -0.06 | 0     | 0.01  | 0.14 | 0.054    | 1        | 0.73     | NA | NA | NA | NA |
| 0.07  | 0.13  | 0     | 0     | 0.15 | 0.0019   | 0.89     | 0.82     | NA | NA | NA | NA |
| 0.11  | 0.05  | -0.01 | 0.12  | 0.15 | 0.099    | 0.85     | 0.00016  | NA | NA | NA | NA |
| 0.08  | 0.05  | -0.03 | 0.04  | 0.15 | 0.3      | 0.08     | 0.16     | NA | NA | NA | NA |
| 0.08  | 0.09  | 0.01  | 0.09  | 0.15 | 0.13     | 0.88     | 0.00028  | NA | NA | NA | NA |
| 0.04  | 0.02  | -0.04 | -0.01 | 0.15 | 0.46     | 0.0054   | 0.46     | NA | NA | NA | NA |
| 0.07  | 0.92  | -0.03 | 0.07  | 0.15 | 0.0012   | 0.63     | 0.24     | NA | NA | NA | NA |
| 0.06  | 0     | -0.02 | -0.01 | 0.16 | 1        | 0.14     | 0.38     | NA | NA | NA | NA |
| -0.03 | 0.06  | -0.03 | -0.01 | 0.16 | 0.015    | 0.04     | 0.49     | NA | NA | NA | NA |
| 0.05  | 0.18  | -0.02 | -0.01 | 0.16 | 1.00E-05 | 0.46     | 0.7      | NA | NA | NA | NA |
| 0.07  | 0.23  | -0.03 | 0     | 0.17 | 1.30E-05 | 0.3      | 0.95     | NA | NA | NA | NA |
| -0.11 | 0.04  | -0.07 | 0.09  | 0.17 | 0.95     | 0.0082   | 0.09     | NA | NA | NA | NA |
| 0.07  | 0.29  | -0.03 | -0.02 | 0.18 | 2.20E-09 | 0.13     | 0.42     | NA | NA | NA | NA |
| 0.05  | 0.03  | -0.01 | 0.04  | 0.18 | 0.22     | 0.59     | 0.093    | NA | NA | NA | NA |
| -0.08 | 0.27  | -0.07 | -0.01 | 0.18 | 0.012    | 0.036    | 0.61     | NA | NA | NA | NA |
| 0.03  | 0.02  | -0.04 | -0.01 | 0.18 | 0.13     | 4.00E-05 | 0.46     | NA | NA | NA | NA |
| -0.04 | -0.05 | -0.04 | 0.02  | 0.19 | 0.13     | 0.014    | 0.25     | NA | NA | NA | NA |
| 0.09  | 0.1   | -0.03 | -0.02 | 0.19 | 0.064    | 0.21     | 0.39     | NA | NA | NA | NA |
| -0.04 | 0.01  | -0.02 | 0.04  | 0.19 | 0.87     | 0.41     | 0.12     | NA | NA | NA | NA |

|       |       |       |       |      |          |          |          |    |    |    |    |
|-------|-------|-------|-------|------|----------|----------|----------|----|----|----|----|
| -0.04 | -0.01 | -0.02 | 0.01  | 0.19 | 0.82     | 0.16     | 0.42     | NA | NA | NA | NA |
| 0.13  | 0.04  | -0.01 | 0.04  | 0.2  | 0.81     | 0.85     | 0.17     | NA | NA | NA | NA |
| 0.03  | 0.11  | -0.04 | 0.01  | 0.2  | 9.70E-09 | 0.00051  | 0.27     | NA | NA | NA | NA |
| -0.1  | 0.03  | -0.1  | -0.08 | 0.21 | 0.9      | 6.00E-05 | 0.0021   | NA | NA | NA | NA |
| 0.07  | 0.03  | -0.05 | -0.02 | 0.21 | 0.35     | 0.002    | 0.27     | NA | NA | NA | NA |
| 0.07  | 0.2   | 0.01  | 0.06  | 0.21 | 2.70E-06 | 0.56     | 0.00061  | NA | NA | NA | NA |
| 0.08  | -0.02 | -0.04 | 0.03  | 0.22 | 0.85     | 0.029    | 0.24     | NA | NA | NA | NA |
| 0.9   | 0.11  | -0.04 | 0.16  | 0.22 | 0.31     | 0.36     | 0.0019   | NA | NA | NA | NA |
| 0.09  | 0.05  | -0.07 | -0.05 | 0.22 | 0.46     | 0.053    | 0.16     | NA | NA | NA | NA |
| 0.07  | 0.02  | -0.07 | 0     | 0.22 | 0.9      | 0.027    | 1        | NA | NA | NA | NA |
| 0.07  | 0.05  | -0.01 | 0.04  | 0.23 | 0.27     | 0.42     | 0.031    | NA | NA | NA | NA |
| 0.04  | 0.09  | -0.01 | -0.02 | 0.23 | 0.00063  | 0.55     | 0.19     | NA | NA | NA | NA |
| 0.07  | 0.01  | -0.02 | 0.09  | 0.24 | 1        | 0.14     | 2.60E-06 | NA | NA | NA | NA |
| -0.04 | 0.06  | -0.04 | 0.02  | 0.24 | 0.06     | 0.0033   | 0.37     | NA | NA | NA | NA |
| 0.05  | 0.13  | -0.09 | -0.05 | 0.24 | 0.0024   | 1.40E-05 | 0.023    | NA | NA | NA | NA |
| -0.17 | 0.54  | -0.03 | -0.15 | 0.25 | 0.0052   | 0.66     | 0.00074  | NA | NA | NA | NA |
| 0.18  | 0.06  | -0.08 | 0     | 0.25 | 0.92     | 0.0063   | 0.97     | NA | NA | NA | NA |
| 0.1   | 0.02  | -0.07 | -0.02 | 0.25 | 0.67     | 0.00018  | 0.37     | NA | NA | NA | NA |
| 0.05  | 0.07  | -0.04 | -0.01 | 0.25 | 0.036    | 0.1      | 0.7      | NA | NA | NA | NA |
| 0.07  | 0.19  | -0.06 | -0.03 | 0.26 | 0.00087  | 0.0033   | 0.26     | NA | NA | NA | NA |
| 0.07  | 0.18  | -0.04 | 0.01  | 0.26 | 0.078    | 0.086    | 0.67     | NA | NA | NA | NA |
| 0.1   | 0.04  | -0.06 | 0.06  | 0.26 | 0.72     | 0.00083  | 0.02     | NA | NA | NA | NA |
| 0.93  | 0.09  | -0.01 | 0.11  | 0.26 | 0.63     | 0.75     | 1.00E-04 | NA | NA | NA | NA |
| -0.11 | -0.01 | -0.06 | -0.01 | 0.27 | 0.97     | 0.0045   | 0.84     | NA | NA | NA | NA |
| 0.64  | NA    | -0.08 | -0.02 | 0.27 | NA       | 0.014    | 0.55     | NA | NA | NA | NA |
| -0.13 | -0.27 | -0.02 | 0.09  | 0.28 | 0.0016   | 0.62     | 0.019    | NA | NA | NA | NA |
| -0.02 | 0     | -0.03 | 0.06  | 0.28 | 0.94     | 0.017    | 2.00E-04 | NA | NA | NA | NA |
| 0.06  | 0.02  | -0.06 | -0.02 | 0.28 | 0.87     | 0.0052   | 0.59     | NA | NA | NA | NA |
| 0.09  | -0.04 | -0.01 | 0.01  | 0.28 | 0.6      | 0.53     | 0.87     | NA | NA | NA | NA |
| 0.11  | 0.12  | -0.09 | -0.11 | 0.28 | 0.23     | 0.0097   | 0.0026   | NA | NA | NA | NA |

|       |       |       |       |      |         |          |          |    |    |    |    |
|-------|-------|-------|-------|------|---------|----------|----------|----|----|----|----|
| 0.06  | -0.04 | -0.05 | 0.04  | 0.29 | 0.4     | 0.00098  | 0.11     | NA | NA | NA | NA |
| 0.07  | -0.04 | -0.01 | -0.01 | 0.29 | 0.33    | 0.63     | 0.88     | NA | NA | NA | NA |
| 0.08  | 0.08  | -0.03 | 0.02  | 0.3  | 0.33    | 0.64     | 0.7      | NA | NA | NA | NA |
| 0.11  | 0.13  | -0.03 | 0.05  | 0.3  | 0.068   | 0.49     | 0.083    | NA | NA | NA | NA |
| 0.05  | 0.05  | -0.07 | -0.04 | 0.31 | 0.55    | 0.091    | 0.25     | NA | NA | NA | NA |
| 0.03  | 0.02  | -0.04 | -0.03 | 0.31 | 0.56    | 0.012    | 0.048    | NA | NA | NA | NA |
| 0.32  | 0     | -0.07 | -0.06 | 0.31 | 1       | 0.012    | 0.22     | NA | NA | NA | NA |
| 0.05  | 0     | 0.08  | 0.13  | 0.32 | 1       | 0.0015   | 5.90E-07 | NA | NA | NA | NA |
| -0.71 | -0.83 | -0.05 | 0.05  | 0.32 | 0.054   | 0.99     | 0.95     | NA | NA | NA | NA |
| 0.07  | -0.01 | -0.05 | 0.06  | 0.32 | 0.88    | 0.0029   | 0.0078   | NA | NA | NA | NA |
| -0.05 | -0.01 | -0.03 | 0.02  | 0.33 | 0.95    | 0.24     | 0.39     | NA | NA | NA | NA |
| -0.05 | 0.08  | -0.04 | 0.06  | 0.33 | 0.1     | 0.081    | 0.021    | NA | NA | NA | NA |
| -0.13 | -0.19 | 0.01  | 0.12  | 0.34 | 0.026   | 0.73     | 1.20E-06 | NA | NA | NA | NA |
| -0.09 | -0.19 | -0.11 | -0.07 | 0.34 | 0.0093  | 2.60E-05 | 0.041    | NA | NA | NA | NA |
| 0.12  | 0.02  | -0.09 | -0.06 | 0.35 | 0.77    | 0.018    | 0.25     | NA | NA | NA | NA |
| 0.09  | 0.33  | -0.12 | -0.03 | 0.35 | 0.0011  | 1.50E-06 | 0.44     | NA | NA | NA | NA |
| -0.06 | -0.01 | -0.02 | 0.01  | 0.36 | 1       | 0.06     | 0.67     | NA | NA | NA | NA |
| 0.13  | 0.06  | -0.06 | 0.06  | 0.37 | 0.73    | 0.014    | 0.18     | NA | NA | NA | NA |
| 0.03  | 0.07  | -0.04 | -0.05 | 0.37 | 0.0075  | 0.064    | 0.015    | NA | NA | NA | NA |
| 0.08  | 0.06  | 0     | 0.03  | 0.37 | 0.51    | 1        | 0.58     | NA | NA | NA | NA |
| 0.01  | 0.04  | -0.02 | -0.02 | 0.37 | 0.00064 | 0.2      | 0.15     | NA | NA | NA | NA |
| 0.07  | 0.12  | -0.03 | 0     | 0.37 | 0.017   | 0.13     | 0.87     | NA | NA | NA | NA |
| -0.08 | -0.14 | -0.03 | 0.03  | 0.38 | 0.0078  | 0.11     | 0.24     | NA | NA | NA | NA |
| 0.16  | 0.2   | 0.05  | 0.15  | 0.38 | 0.5     | 0.85     | 0.072    | NA | NA | NA | NA |
| 0.03  | 0.01  | -0.08 | -0.02 | 0.38 | 0.7     | 1.40E-07 | 0.22     | NA | NA | NA | NA |
| -0.1  | -0.07 | 0.06  | 0.02  | 0.38 | 0.89    | 0.2      | 0.54     | NA | NA | NA | NA |
| 0.07  | 0.07  | 0     | 0.04  | 0.39 | 0.035   | 0.92     | 0.012    | NA | NA | NA | NA |
| 0.21  | 0.08  | -0.03 | 0.03  | 0.39 | 0.079   | 0.19     | 0.39     | NA | NA | NA | NA |
| 0.15  | 0.11  | -0.03 | 0.02  | 0.39 | 0.23    | 0.2      | 0.52     | NA | NA | NA | NA |
| 0.14  | 0.08  | -0.04 | -0.03 | 0.39 | 0.8     | 0.57     | 0.38     | NA | NA | NA | NA |

|       |       |       |       |      |          |          |          |    |    |    |    |
|-------|-------|-------|-------|------|----------|----------|----------|----|----|----|----|
| 0.24  | -0.19 | -0.05 | -0.01 | 0.39 | 0.053    | 0.2      | 0.86     | NA | NA | NA | NA |
| 0.03  | 0.1   | 0.02  | 0.12  | 0.39 | 0.023    | 0.78     | 0.059    | NA | NA | NA | NA |
| 0.06  | -0.12 | -0.01 | 0.13  | 0.4  | 0.037    | 0.98     | 0.0069   | NA | NA | NA | NA |
| 0.05  | -0.06 | -0.04 | 0.05  | 0.4  | 0.17     | 0.008    | 0.0062   | NA | NA | NA | NA |
| 0.28  | 0.06  | -0.06 | 0.07  | 0.4  | 0.97     | 0.016    | 0.018    | NA | NA | NA | NA |
| 0.03  | 0.06  | -0.01 | 0.01  | 0.4  | 0.19     | 0.84     | 0.7      | NA | NA | NA | NA |
| 0.17  | -0.22 | -0.08 | 0.04  | 0.41 | 0.11     | 0.014    | 0.48     | NA | NA | NA | NA |
| 0.03  | 0.04  | -0.03 | 0.04  | 0.41 | 0.043    | 0.0049   | 0.0087   | NA | NA | NA | NA |
| -0.01 | 0.04  | -0.03 | -0.05 | 0.42 | 0.00097  | 0.0046   | 6.10E-08 | NA | NA | NA | NA |
| 0.02  | 0.15  | 0     | 0.04  | 0.42 | 1.80E-07 | 1        | 0.0031   | NA | NA | NA | NA |
| 0.2   | 0.22  | -0.04 | -0.02 | 0.43 | 0.32     | 0.58     | 0.89     | NA | NA | NA | NA |
| 0.09  | 0.24  | -0.09 | -0.09 | 0.43 | 0.0052   | 0.004    | 0.014    | NA | NA | NA | NA |
| 0.04  | -0.01 | 0.01  | 0.04  | 0.43 | 0.92     | 0.75     | 0.012    | NA | NA | NA | NA |
| 0.04  | 0.09  | -0.03 | 0.07  | 0.44 | 0.0019   | 0.17     | 0.0027   | NA | NA | NA | NA |
| 0.13  | 0.08  | -0.01 | 0.11  | 0.44 | 1        | 0.73     | 0.00077  | NA | NA | NA | NA |
| -0.28 | -0.07 | -0.05 | 0.03  | 0.44 | 1        | 0.08     | 0.44     | NA | NA | NA | NA |
| -0.08 | -0.04 | -0.07 | -0.02 | 0.44 | 0.65     | 0.18     | 0.74     | NA | NA | NA | NA |
| 0.42  | 0.17  | 0.03  | -0.05 | 0.45 | 0.15     | 0.7      | 0.53     | NA | NA | NA | NA |
| -0.05 | NA    | -0.05 | -0.01 | 0.45 | NA       | 0.097    | 0.89     | NA | NA | NA | NA |
| -0.04 | 0.19  | -0.03 | 0.09  | 0.45 | 0.00062  | 0.15     | 0.00074  | NA | NA | NA | NA |
| 0.26  | 0.42  | -0.01 | 0.04  | 0.45 | 0.6      | 0.59     | 0.066    | NA | NA | NA | NA |
| -0.09 | -0.02 | -0.07 | 0.03  | 0.46 | 0.75     | 0.029    | 0.57     | NA | NA | NA | NA |
| -0.06 | -0.06 | -0.07 | 0.07  | 0.46 | 0.52     | 0.046    | 0.16     | NA | NA | NA | NA |
| 0.07  | 0.17  | -0.1  | 0     | 0.47 | 0.018    | 1.10E-06 | 0.97     | NA | NA | NA | NA |
| 0.05  | 0.2   | -0.01 | 0.01  | 0.47 | 0.0012   | 0.51     | 0.83     | NA | NA | NA | NA |
| 0.02  | 0.04  | 0.01  | 0.04  | 0.47 | 0.2      | 0.59     | 0.0033   | NA | NA | NA | NA |
| 0.04  | 0.08  | -0.08 | 0.09  | 0.47 | 0.02     | 0.00035  | 0.0024   | NA | NA | NA | NA |
| -0.05 | 0.12  | 0     | -0.02 | 0.47 | 0.039    | 1        | 0.45     | NA | NA | NA | NA |
| -0.06 | 0.06  | -0.01 | 0.04  | 0.47 | 0.4      | 0.94     | 0.28     | NA | NA | NA | NA |
| 0.05  | 0.1   | -0.14 | -0.06 | 0.47 | 0.013    | 0.0013   | 0.22     | NA | NA | NA | NA |



|       |       |       |       |      |          |          |          |    |    |    |    |
|-------|-------|-------|-------|------|----------|----------|----------|----|----|----|----|
| -0.06 | 0.01  | 0.01  | 0.01  | 0.48 | 1        | 0.73     | 0.76     | NA | NA | NA | NA |
| 0.05  | 0.05  | -0.06 | -0.02 | 0.48 | 0.42     | 0.0056   | 0.37     | NA | NA | NA | NA |
| 0.14  | 0.12  | 0.01  | 0.01  | 0.48 | 0.14     | 0.9      | 1        | NA | NA | NA | NA |
| 0.05  | 0     | -0.04 | 0.02  | 0.48 | 1        | 0.031    | 0.18     | NA | NA | NA | NA |
| 0.02  | -0.02 | -0.02 | 0.01  | 0.48 | 0.38     | 0.07     | 0.56     | NA | NA | NA | NA |
| 0.02  | 0.03  | -0.03 | 0.03  | 0.49 | 0.072    | 0.05     | 0.047    | NA | NA | NA | NA |
| 0.14  | -0.07 | 0.03  | 0.02  | 0.49 | 0.58     | 0.1      | 0.28     | NA | NA | NA | NA |
| 0.05  | 0.02  | -0.03 | 0.02  | 0.49 | 0.88     | 0.61     | 0.6      | NA | NA | NA | NA |
| 0.02  | 0.03  | 0     | 0.01  | 0.49 | 0.11     | 0.73     | 0.42     | NA | NA | NA | NA |
| 0.03  | 0.12  | -0.09 | -0.07 | 0.49 | 0.0024   | 2.90E-06 | 0.00087  | NA | NA | NA | NA |
| 0.09  | -0.09 | -0.05 | -0.05 | 0.49 | 0.52     | 0.071    | 0.19     | NA | NA | NA | NA |
| -0.07 | 0.68  | -0.02 | 0.2   | 0.5  | 3.40E-05 | 0.83     | 0.0018   | NA | NA | NA | NA |
| -0.08 | 0.08  | -0.04 | 0.07  | 0.5  | 0.48     | 0.21     | 0.066    | NA | NA | NA | NA |
| -0.35 | -0.5  | -0.11 | -0.02 | 0.5  | 0.081    | 0.23     | 1        | NA | NA | NA | NA |
| 0.09  | 0.01  | -0.12 | 0     | 0.5  | 1        | 4.30E-06 | 0.98     | NA | NA | NA | NA |
| 0.04  | 0.09  | -0.04 | 0.05  | 0.5  | 0.022    | 0.052    | 0.067    | NA | NA | NA | NA |
| 0.02  | 0.02  | -0.01 | 0.04  | 0.51 | 0.57     | 0.35     | 0.0094   | NA | NA | NA | NA |
| -0.05 | -0.01 | 0.03  | 0.03  | 0.51 | 1        | 0.63     | 0.61     | NA | NA | NA | NA |
| 0.07  | -0.02 | -0.03 | 0.06  | 0.51 | 0.83     | 0.15     | 0.016    | NA | NA | NA | NA |
| 0.79  | 0.18  | -0.07 | 0.08  | 0.51 | 0.35     | 0.07     | 0.12     | NA | NA | NA | NA |
| 0.04  | 0.13  | -0.11 | -0.01 | 0.51 | 0.6      | 0.00015  | 0.81     | NA | NA | NA | NA |
| 0.03  | 0.09  | 0     | 0.02  | 0.52 | 0.00012  | 0.99     | 0.27     | NA | NA | NA | NA |
| -0.03 | -0.06 | -0.06 | 0     | 0.52 | 0.21     | 0.0043   | 0.97     | NA | NA | NA | NA |
| -0.06 | -0.13 | 0.11  | 0.36  | 0.52 | 0.21     | 0.056    | 3.90E-09 | NA | NA | NA | NA |
| 0.06  | 0.27  | -0.11 | -0.08 | 0.53 | 0.00019  | 0.0044   | 0.021    | NA | NA | NA | NA |
| 0.07  | 0.04  | 0.21  | -0.01 | 0.53 | 0.81     | 0.11     | 0.97     | NA | NA | NA | NA |
| 0.03  | 0.01  | -0.1  | 0.05  | 0.53 | 0.95     | 2.10E-05 | 0.13     | NA | NA | NA | NA |
| 0.02  | 0     | -0.04 | 0     | 0.53 | 0.85     | 0.0012   | 0.98     | NA | NA | NA | NA |
| 0.08  | -0.03 | -0.02 | 0.08  | 0.53 | 1        | 0.73     | 0.095    | NA | NA | NA | NA |
| 0.02  | 0.03  | -0.06 | -0.04 | 0.53 | 0.4      | 0.00012  | 0.018    | NA | NA | NA | NA |

|       |       |       |       |      |         |          |         |    |    |    |    |
|-------|-------|-------|-------|------|---------|----------|---------|----|----|----|----|
| 0.16  | NA    | -0.08 | 0     | 0.53 | NA      | 0.0024   | 1       | NA | NA | NA | NA |
| 0.03  | 0.07  | -0.03 | -0.01 | 0.54 | 0.43    | 0.21     | 0.67    | NA | NA | NA | NA |
| 0.08  | 0.05  | -0.2  | -0.16 | 0.54 | 0.64    | 2.30E-07 | 0.00014 | NA | NA | NA | NA |
| -0.77 | -0.63 | -0.05 | -0.02 | 0.54 | 0.81    | 0.055    | 0.56    | NA | NA | NA | NA |
| 0.02  | 0.02  | -0.02 | 0.02  | 0.55 | 0.32    | 0.35     | 0.34    | NA | NA | NA | NA |
| -0.03 | 0.1   | -0.05 | -0.09 | 0.55 | 0.0083  | 0.15     | 0.0018  | NA | NA | NA | NA |
| 0.05  | 0.02  | -0.02 | 0.04  | 0.55 | 0.87    | 0.35     | 0.11    | NA | NA | NA | NA |
| 0.43  | -0.35 | 0.43  | 0.2   | 0.55 | 0.36    | 0.0038   | 0.21    | NA | NA | NA | NA |
| 0.07  | -0.14 | -0.13 | -0.04 | 0.56 | 0.0031  | 1.00E-07 | 0.12    | NA | NA | NA | NA |
| 0.02  | 0.08  | -0.04 | 0.04  | 0.56 | 0.0025  | 0.0059   | 0.052   | NA | NA | NA | NA |
| 0.07  | 0.13  | -0.06 | 0.11  | 0.56 | 0.11    | 0.017    | 0.0018  | NA | NA | NA | NA |
| -0.02 | 0.01  | -0.05 | -0.03 | 0.56 | 0.84    | 6.60E-05 | 0.03    | NA | NA | NA | NA |
| 0.03  | -0.01 | -0.08 | -0.05 | 0.57 | 0.9     | 7.00E-04 | 0.1     | NA | NA | NA | NA |
| 0.04  | -0.02 | -0.04 | 0.01  | 0.57 | 0.79    | 0.017    | 0.6     | NA | NA | NA | NA |
| 0.01  | 0.06  | -0.01 | 0.02  | 0.57 | 0.00074 | 0.43     | 0.15    | NA | NA | NA | NA |
| -0.05 | -0.01 | -0.09 | -0.07 | 0.58 | 1       | 0.00014  | 0.062   | NA | NA | NA | NA |
| 0.1   | -0.02 | 0.01  | 0.1   | 0.58 | 0.92    | 0.71     | 0.0018  | NA | NA | NA | NA |
| 0.03  | 0.01  | -0.04 | 0     | 0.58 | 0.96    | 0.087    | 1       | NA | NA | NA | NA |
| 0.02  | 0.09  | -0.03 | 0.02  | 0.59 | 0.032   | 0.1      | 0.34    | NA | NA | NA | NA |
| -0.08 | 0.69  | 0.01  | 0.09  | 0.59 | 0.073   | 0.69     | 0.0035  | NA | NA | NA | NA |
| 0.04  | 0.02  | -0.04 | 0.01  | 0.61 | 0.96    | 0.063    | 0.67    | NA | NA | NA | NA |
| -0.05 | 0.26  | 0.03  | 0.08  | 0.61 | 0.00051 | 0.31     | 0.0073  | NA | NA | NA | NA |
| -0.04 | 0.04  | -0.04 | 0.02  | 0.61 | 0.42    | 0.077    | 0.4     | NA | NA | NA | NA |
| -0.02 | 0     | 0     | -0.01 | 0.61 | 1       | 1        | 0.48    | NA | NA | NA | NA |
| 0.02  | 0     | 0.01  | 0.03  | 0.62 | 1       | 0.66     | 0.19    | NA | NA | NA | NA |
| -0.02 | 0.12  | -0.01 | 0.05  | 0.63 | 0.00075 | 0.29     | 0.0017  | NA | NA | NA | NA |
| -0.37 | -0.55 | -0.06 | 0.08  | 0.64 | 0.00031 | 0.013    | 0.017   | NA | NA | NA | NA |
| 0.07  | NA    | -0.11 | -0.01 | 0.65 | NA      | 0.0058   | 0.85    | NA | NA | NA | NA |
| -0.02 | 0.03  | 0.02  | 0.02  | 0.65 | 0.39    | 0.27     | 0.3     | NA | NA | NA | NA |
| 0.04  | -0.01 | -0.03 | -0.04 | 0.65 | 0.87    | 0.05     | 0.054   | NA | NA | NA | NA |

|       |       |       |       |      |          |          |          |    |    |    |    |
|-------|-------|-------|-------|------|----------|----------|----------|----|----|----|----|
| -0.01 | -0.01 | -0.06 | 0     | 0.65 | 0.87     | 0.009    | 0.98     | NA | NA | NA | NA |
| 0.25  | -0.03 | -0.06 | 0.02  | 0.66 | 1        | 0.14     | 0.68     | NA | NA | NA | NA |
| 0.04  | 0.05  | -0.12 | -0.09 | 0.66 | 0.5      | 9.60E-05 | 0.004    | NA | NA | NA | NA |
| 0.08  | 0.06  | -0.02 | 0.03  | 0.68 | 0.36     | 0.46     | 0.39     | NA | NA | NA | NA |
| 0.11  | 0.08  | -0.1  | -0.1  | 0.69 | 0.31     | 0.021    | 0.041    | NA | NA | NA | NA |
| 0.04  | -0.01 | -0.04 | 0.08  | 0.7  | 1        | 0.12     | 0.0066   | NA | NA | NA | NA |
| 0.03  | 0.08  | -0.01 | 0.01  | 0.71 | 0.061    | 0.5      | 0.75     | NA | NA | NA | NA |
| -0.06 | 0.16  | 0.06  | 0.08  | 0.71 | 0.12     | 0.074    | 0.007    | NA | NA | NA | NA |
| 0.02  | 0.09  | -0.05 | 0     | 0.71 | 0.0019   | 0.0033   | 1        | NA | NA | NA | NA |
| 0.03  | 0.07  | -0.04 | -0.04 | 0.71 | 0.28     | 0.12     | 0.098    | NA | NA | NA | NA |
| 0.01  | 0.2   | -0.02 | -0.02 | 0.72 | 7.90E-07 | 0.45     | 0.5      | NA | NA | NA | NA |
| 0.03  | 0.06  | -0.01 | -0.01 | 0.72 | 0.062    | 0.49     | 0.48     | NA | NA | NA | NA |
| 0.05  | 0.14  | -0.11 | -0.14 | 0.73 | 0.14     | 0.0064   | 0.0026   | NA | NA | NA | NA |
| -0.03 | -0.07 | -0.06 | 0     | 0.73 | 0.38     | 0.055    | 0.95     | NA | NA | NA | NA |
| 0.02  | 0.05  | -0.01 | 0.01  | 0.73 | 0.17     | 0.59     | 0.65     | NA | NA | NA | NA |
| 0.03  | -0.02 | -0.06 | -0.01 | 0.73 | 0.85     | 0.015    | 0.65     | NA | NA | NA | NA |
| 0.1   | 0.4   | -0.02 | 0     | 0.73 | 0.035    | 0.89     | 1        | NA | NA | NA | NA |
| -0.04 | NA    | 0.05  | 0.15  | 0.74 | NA       | 0.092    | 0.0012   | NA | NA | NA | NA |
| -0.02 | 0.05  | -0.08 | -0.01 | 0.74 | 0.3      | 8.00E-05 | 0.63     | NA | NA | NA | NA |
| -0.03 | -0.04 | 0.01  | 0.1   | 0.75 | 0.41     | 0.82     | 2.30E-05 | NA | NA | NA | NA |
| 0.03  | 0.17  | 0.05  | -0.01 | 0.75 | 5.00E-05 | 0.13     | 0.74     | NA | NA | NA | NA |
| 0.16  | 0.1   | -0.21 | -0.01 | 0.75 | 1        | 6.00E-04 | 1        | NA | NA | NA | NA |
| -0.03 | 0.08  | 0     | 0.04  | 0.76 | 0.14     | 0.97     | 0.089    | NA | NA | NA | NA |
| 0.03  | -0.01 | -0.03 | 0.01  | 0.76 | 0.79     | 0.16     | 0.57     | NA | NA | NA | NA |
| -0.03 | 0.05  | -0.07 | -0.08 | 0.76 | 0.62     | 0.021    | 0.00037  | NA | NA | NA | NA |
| -0.01 | 0.21  | -0.05 | 0.03  | 0.76 | 1.70E-06 | 0.0017   | 0.18     | NA | NA | NA | NA |
| 0.06  | -0.13 | 0.03  | -0.08 | 0.77 | 0.069    | 0.71     | 0.21     | NA | NA | NA | NA |
| 0.02  | -0.02 | 0.01  | 0.05  | 0.77 | 0.35     | 0.71     | 0.00036  | NA | NA | NA | NA |
| -0.01 | 0.11  | -0.02 | 0.1   | 0.77 | 0.014    | 0.24     | 0.00033  | NA | NA | NA | NA |
| 0.02  | 0.09  | -0.06 | -0.03 | 0.78 | 0.0032   | 1.00E-04 | 0.077    | NA | NA | NA | NA |

|       |       |       |       |      |          |          |          |    |    |    |    |
|-------|-------|-------|-------|------|----------|----------|----------|----|----|----|----|
| 0.01  | 0.01  | -0.05 | -0.02 | 0.78 | 0.7      | 0.00038  | 0.23     | NA | NA | NA | NA |
| 0.03  | 0.2   | 0.04  | 0.04  | 0.79 | 0.0013   | 0.057    | 0.015    | NA | NA | NA | NA |
| -0.02 | -0.05 | -0.08 | -0.02 | 0.79 | 0.36     | 0.0041   | 0.69     | NA | NA | NA | NA |
| -0.01 | 0.05  | -0.06 | -0.04 | 0.8  | 0.11     | 5.20E-05 | 0.0034   | NA | NA | NA | NA |
| 0.03  | 0.03  | -0.01 | 0.01  | 0.81 | 0.89     | 0.66     | 0.84     | NA | NA | NA | NA |
| 0.02  | -0.07 | -0.03 | -0.01 | 0.82 | 0.06     | 0.039    | 0.48     | NA | NA | NA | NA |
| -0.02 | 0.05  | -0.05 | 0.02  | 0.82 | 0.57     | 0.017    | 0.48     | NA | NA | NA | NA |
| 0.03  | -0.04 | 0.08  | 0.09  | 0.82 | 0.53     | 0.1      | 0.029    | NA | NA | NA | NA |
| 0.02  | 0.09  | -0.11 | -0.07 | 0.83 | 0.059    | 4.50E-05 | 0.03     | NA | NA | NA | NA |
| -0.01 | 0.01  | -0.04 | 0     | 0.83 | 1        | 0.015    | 1        | NA | NA | NA | NA |
| 0.02  | 0.01  | -0.01 | 0.03  | 0.83 | 0.81     | 0.85     | 0.13     | NA | NA | NA | NA |
| 0.01  | 0.08  | -0.03 | 0.01  | 0.83 | 0.33     | 0.2      | 0.9      | NA | NA | NA | NA |
| 0.01  | 0.03  | 0     | 0.01  | 0.83 | 0.44     | 0.97     | 0.56     | NA | NA | NA | NA |
| 0.03  | 0.1   | 0.01  | 0.13  | 0.83 | 0.12     | 0.75     | 4.60E-05 | NA | NA | NA | NA |
| 0.02  | 0.12  | -0.02 | 0.01  | 0.84 | 0.094    | 0.23     | 0.58     | NA | NA | NA | NA |
| -0.05 | -0.07 | -0.04 | 0.06  | 0.84 | 0.54     | 0.25     | 0.12     | NA | NA | NA | NA |
| 0.04  | 0.02  | -0.01 | -0.08 | 0.85 | 1        | 0.88     | 0.018    | NA | NA | NA | NA |
| 0.01  | 0.02  | -0.01 | -0.03 | 0.85 | 0.56     | 0.65     | 0.34     | NA | NA | NA | NA |
| -0.01 | 0.14  | -0.04 | -0.02 | 0.85 | 3.50E-07 | 0.00045  | 0.14     | NA | NA | NA | NA |
| -0.08 | 0.14  | -0.04 | 0     | 0.86 | 0.22     | 0.14     | 1        | NA | NA | NA | NA |
| 0.06  | 0.16  | -0.02 | 0.02  | 0.86 | 0.0048   | 0.59     | 0.69     | NA | NA | NA | NA |
| 0.02  | -0.1  | -0.03 | -0.01 | 0.86 | 0.12     | 0.28     | 0.84     | NA | NA | NA | NA |
| 0.03  | 0.04  | -0.05 | -0.04 | 0.86 | 0.58     | 0.26     | 0.57     | NA | NA | NA | NA |
| -0.02 | -0.13 | 0.04  | 0     | 0.86 | 0.0099   | 0.081    | 1        | NA | NA | NA | NA |
| 0.07  | -0.04 | -0.02 | 0     | 0.88 | 0.96     | 0.81     | 1        | NA | NA | NA | NA |
| -0.12 | NA    | -0.18 | -0.11 | 0.88 | NA       | 0.013    | 0.34     | NA | NA | NA | NA |
| 0.04  | 0.03  | -0.06 | -0.09 | 0.89 | 1        | 0.02     | 0.00068  | NA | NA | NA | NA |
| -0.02 | 0.08  | -0.03 | -0.03 | 0.89 | 0.2      | 0.23     | 0.28     | NA | NA | NA | NA |
| -0.04 | -0.01 | 0.02  | 0.06  | 0.89 | 1        | 0.46     | 0.096    | NA | NA | NA | NA |
| 0.02  | 0.2   | 0     | 0.03  | 0.89 | 0.00091  | 0.91     | 0.11     | NA | NA | NA | NA |

|       |       |       |       |      |          |          |         |    |    |    |    |
|-------|-------|-------|-------|------|----------|----------|---------|----|----|----|----|
| -0.01 | 0.06  | -0.05 | 0     | 0.9  | 0.0079   | 0.0013   | 0.88    | NA | NA | NA | NA |
| 0.02  | 0.44  | 0     | 0.03  | 0.9  | 1.60E-05 | 1        | 0.58    | NA | NA | NA | NA |
| 0.02  | -0.01 | 0     | 0.05  | 0.9  | 0.65     | 1        | 0.16    | NA | NA | NA | NA |
| 0.03  | -0.04 | -0.06 | 0     | 0.9  | 0.73     | 0.00049  | 1       | NA | NA | NA | NA |
| 0.01  | 0     | -0.02 | -0.01 | 0.92 | 1        | 0.55     | 0.76    | NA | NA | NA | NA |
| -0.01 | 0.1   | 0.01  | 0.05  | 0.92 | 2.00E-04 | 1        | 0.46    | NA | NA | NA | NA |
| 0.02  | 0.17  | -0.05 | 0.04  | 0.92 | 0.061    | 0.023    | 0.2     | NA | NA | NA | NA |
| 0.01  | 0.05  | -0.09 | 0.08  | 0.92 | 0.14     | 1.00E-06 | 0.0023  | NA | NA | NA | NA |
| 0.05  | 0.08  | -0.05 | 0.04  | 0.94 | 0.16     | 0.0018   | 0.057   | NA | NA | NA | NA |
| 0.03  | 0.12  | -0.04 | 0.04  | 0.94 | 0.12     | 0.16     | 0.099   | NA | NA | NA | NA |
| 0.02  | -0.16 | -0.01 | 0.03  | 0.95 | 0.12     | 1        | 0.49    | NA | NA | NA | NA |
| 0.01  | 0.04  | -0.06 | -0.01 | 0.95 | 0.3      | 0.00027  | 0.42    | NA | NA | NA | NA |
| 0.01  | 0.06  | -0.04 | -0.06 | 0.96 | 0.19     | 0.0098   | 0.00025 | NA | NA | NA | NA |
| 0.02  | 0.03  | -0.05 | -0.01 | 0.97 | 0.66     | 0.042    | 0.66    | NA | NA | NA | NA |
| -0.03 | 0     | 0.06  | 0.07  | 0.97 | 1        | 0.054    | 0.0074  | NA | NA | NA | NA |
| -0.01 | 0.06  | -0.03 | -0.03 | 0.97 | 0.048    | 0.099    | 0.14    | NA | NA | NA | NA |
| 0.04  | 0.04  | 0     | -0.06 | 0.98 | 0.85     | 1        | 0.083   | NA | NA | NA | NA |
| 0.01  | 0     | -0.07 | -0.02 | 0.98 | 1        | 0.0046   | 0.53    | NA | NA | NA | NA |
| 0     | 0.06  | -0.02 | 0.03  | 0.99 | 0.06     | 0.21     | 0.08    | NA | NA | NA | NA |
| -0.02 | -0.09 | -0.03 | -0.03 | 0.99 | 0.35     | 0.68     | 0.7     | NA | NA | NA | NA |
| -0.12 | -0.38 | 0.01  | 0.01  | 1    | 0.3      | 0.97     | 0.97    | NA | NA | NA | NA |
| 0.02  | 0.08  | -0.09 | -0.05 | 1    | 0.23     | 0.088    | 0.42    | NA | NA | NA | NA |
| 0     | 0.05  | 0     | 0.01  | 1    | 0.75     | 1        | 0.99    | NA | NA | NA | NA |
| 0.5   | 0.05  | -0.08 | 0.08  | 1    | 1        | 0.065    | 0.31    | NA | NA | NA | NA |
| 0     | -0.03 | -0.07 | -0.01 | 1    | 0.44     | 1.40E-07 | 0.59    | NA | NA | NA | NA |
| 0.08  | -0.02 | -0.04 | -0.04 | 1    | 1        | 0.69     | 0.49    | NA | NA | NA | NA |
| 0.08  | NA    | 0.06  | 0.12  | 1    | NA       | 0.1      | 0.022   | NA | NA | NA | NA |
| 0     | 0     | -0.05 | -0.01 | 1    | 1        | 0.033    | 0.74    | NA | NA | NA | NA |
| -0.2  | -0.27 | 0.11  | 0.3   | 1    | 1        | 0.82     | 0.16    | NA | NA | NA | NA |
| 0     | 0.05  | 0.03  | 0.07  | 1    | 0.13     | 0.29     | 0.009   | NA | NA | NA | NA |

|       |       |       |       |   |          |          |          |    |    |    |    |
|-------|-------|-------|-------|---|----------|----------|----------|----|----|----|----|
| 0     | 0.03  | -0.02 | 0     | 1 | 0.26     | 0.027    | 0.83     | NA | NA | NA | NA |
| 0     | 0.2   | 0.02  | 0.07  | 1 | 8.90E-05 | 0.61     | 0.04     | NA | NA | NA | NA |
| 0.02  | NA    | -0.05 | -0.03 | 1 | NA       | 0.5      | 0.63     | NA | NA | NA | NA |
| 0.01  | 0.02  | -0.02 | 0.01  | 1 | 0.58     | 0.23     | 0.46     | NA | NA | NA | NA |
| 0     | -0.11 | -0.13 | -0.1  | 1 | 0.23     | 8.30E-06 | 8.00E-05 | NA | NA | NA | NA |
| 0.04  | -0.21 | -0.09 | 0     | 1 | 0.11     | 0.042    | 1        | NA | NA | NA | NA |
| 0     | 0.29  | -0.07 | 0.04  | 1 | 0.33     | 0.0094   | 0.3      | NA | NA | NA | NA |
| 0.05  | 0.36  | -0.11 | -0.13 | 1 | 1.70E-05 | 0.00056  | 4.50E-05 | NA | NA | NA | NA |
| 0.03  | -0.23 | -0.03 | 0.14  | 1 | 0.081    | 0.45     | 0.00051  | NA | NA | NA | NA |
| -0.01 | -0.15 | 0     | 0.09  | 1 | 0.26     | 1        | 0.0021   | NA | NA | NA | NA |
| -0.09 | -0.09 | 0     | 0.09  | 1 | 0.96     | 1        | 0.01     | NA | NA | NA | NA |
| 0     | 0.23  | 0.04  | -0.01 | 1 | 0.00063  | 0.41     | 0.83     | NA | NA | NA | NA |
| -0.01 | 0.08  | -0.03 | -0.03 | 1 | 0.92     | 0.45     | 0.43     | NA | NA | NA | NA |
| 0.09  | NA    | 0.07  | 0.23  | 1 | NA       | 0.38     | 0.004    | NA | NA | NA | NA |
| 0     | 0.01  | -0.02 | 0.04  | 1 | 0.81     | 0.22     | 0.034    | NA | NA | NA | NA |
| 0     | -0.13 | 0     | 0.02  | 1 | 0.006    | 1        | 0.27     | NA | NA | NA | NA |
| 0.09  | 0.13  | 0.01  | 0.04  | 1 | 0.094    | 0.93     | 0.45     | NA | NA | NA | NA |
| 0     | -0.17 | 0.04  | 0.11  | 1 | 1        | 0.57     | 0.23     | NA | NA | NA | NA |
| -0.01 | -0.33 | 0.02  | 0.8   | 1 | 0.00088  | 0.77     | 0.0088   | NA | NA | NA | NA |
| 0.02  | 0.07  | -0.11 | -0.03 | 1 | 0.66     | 0.00055  | 0.42     | NA | NA | NA | NA |
| 0     | -0.02 | -0.05 | 0.04  | 1 | 0.74     | 0.007    | 0.07     | NA | NA | NA | NA |
| 0.02  | 0.11  | -0.02 | 0.04  | 1 | 1        | 0.52     | 0.3      | NA | NA | NA | NA |
| -0.01 | 0.09  | -0.03 | 0.15  | 1 | 0.37     | 0.59     | 0.0031   | NA | NA | NA | NA |
| 0     | 0     | -0.32 | -0.34 | 1 | 1        | 4.40E-05 | 2.00E-04 | NA | NA | NA | NA |
| -0.03 | 0.1   | 0.04  | NA    | 1 | 0.78     | 0.77     | NA       | NA | NA | NA | NA |
| -0.03 | 0.14  | -0.02 | 0.06  | 1 | 0.029    | 0.39     | 0.029    | NA | NA | NA | NA |
| 0     | 0     | -0.12 | 0.67  | 1 | 1        | 0.13     | 0.0012   | NA | NA | NA | NA |
| 0.01  | -0.02 | -0.08 | -0.02 | 1 | 0.54     | 5.10E-06 | 0.39     | NA | NA | NA | NA |
| 0.3   | NA    | NA    | NA    | 1 | NA       | NA       | NA       | NA | NA | NA | NA |
| 0     | 0.02  | -0.1  | -0.13 | 1 | 0.9      | 4.40E-06 | 9.10E-08 | NA | NA | NA | NA |

|       |       |       |       |   |        |          |        |    |    |    |    |
|-------|-------|-------|-------|---|--------|----------|--------|----|----|----|----|
| -0.04 | -0.01 | -0.04 | 0.01  | 1 | 1      | 0.35     | 0.93   | NA | NA | NA | NA |
| 0     | -0.01 | -0.03 | -0.03 | 1 | 0.94   | 0.2      | 0.18   | NA | NA | NA | NA |
| 0     | 0.11  | -0.08 | 0.01  | 1 | 0.099  | 0.0075   | 0.89   | NA | NA | NA | NA |
| 0.02  | 0.07  | -0.06 | -0.01 | 1 | 0.11   | 0.0021   | 0.89   | NA | NA | NA | NA |
| 0.01  | 0.03  | -0.03 | 0.02  | 1 | 1      | 0.17     | 0.44   | NA | NA | NA | NA |
| 0.04  | 0.22  | 0.03  | 0.09  | 1 | 0.0019 | 0.56     | 0.0032 | NA | NA | NA | NA |
| -0.04 | 0.12  | -0.05 | 0.03  | 1 | 0.49   | 0.16     | 0.42   | NA | NA | NA | NA |
| 0.01  | 0.01  | -0.01 | 0.07  | 1 | 0.88   | 1        | 0.1    | NA | NA | NA | NA |
| -0.01 | 0.02  | -0.03 | 0.04  | 1 | 0.78   | 0.079    | 0.04   | NA | NA | NA | NA |
| 0.01  | 0.14  | 0.04  | 0.07  | 1 | 0.12   | 0.27     | 0.031  | NA | NA | NA | NA |
| -0.01 | 0.06  | -0.07 | -0.04 | 1 | 0.63   | 0.0033   | 0.2    | NA | NA | NA | NA |
| -0.03 | -0.2  | -0.14 | -0.07 | 1 | 0.25   | 1.30E-05 | 0.052  | NA | NA | NA | NA |
| -0.04 | 0.18  | -0.07 | 0.01  | 1 | 0.12   | 0.00083  | 0.8    | NA | NA | NA | NA |
| 0     | -0.53 | 0.06  | 0.31  | 1 | 0.0029 | 0.83     | 0.11   | NA | NA | NA | NA |
| 0.01  | 0.05  | -0.01 | 0.04  | 1 | 0.08   | 0.8      | 0.042  | NA | NA | NA | NA |
| -0.05 | -0.04 | -0.07 | 0.1   | 1 | 0.63   | 0.12     | 0.15   | NA | NA | NA | NA |
| -0.01 | -0.08 | 0.03  | 0.03  | 1 | 0.47   | 0.25     | 0.22   | NA | NA | NA | NA |
| 0     | NA    | -0.12 | -0.13 | 1 | NA     | 0.16     | 0.14   | NA | NA | NA | NA |
| -0.01 | -0.04 | 0.02  | 0.05  | 1 | 0.45   | 0.76     | 0.41   | NA | NA | NA | NA |
| 0.05  | 0.3   | -0.06 | -0.12 | 1 | 0.57   | 0.3      | 0.0026 | NA | NA | NA | NA |
| 0.07  | 0.16  | 0.05  | -0.06 | 1 | 0.82   | 0.34     | 0.046  | NA | NA | NA | NA |
| 0     | 0.19  | -0.06 | 0.06  | 1 | 0.085  | 0.056    | 0.21   | NA | NA | NA | NA |
| 0.26  | 0.24  | -0.15 | -0.13 | 1 | 0.11   | 0.00085  | 0.092  | NA | NA | NA | NA |
| -0.02 | 0.23  | -0.06 | -0.03 | 1 | 0.0047 | 0.025    | 0.34   | NA | NA | NA | NA |
| 0.01  | 0.04  | -0.03 | 0.02  | 1 | 0.17   | 0.046    | 0.14   | NA | NA | NA | NA |
| 0.52  | -0.21 | -0.12 | 0.04  | 1 | 0.16   | 3.40E-08 | 0.16   | NA | NA | NA | NA |
| 0     | -0.03 | -0.01 | -0.02 | 1 | 0.33   | 0.86     | 0.5    | NA | NA | NA | NA |
| -0.01 | -0.03 | 0     | 0.07  | 1 | 0.79   | 1        | 0.085  | NA | NA | NA | NA |
| 0.05  | 0.03  | -0.01 | -0.03 | 1 | 0.28   | 0.84     | 0.46   | NA | NA | NA | NA |
| 0     | 0.03  | -0.12 | 0.01  | 1 | 0.44   | 7.30E-05 | 0.93   | NA | NA | NA | NA |

|       |       |       |       |    |       |        |          |    |    |    |    |
|-------|-------|-------|-------|----|-------|--------|----------|----|----|----|----|
| 0.02  | 0.05  | 0.01  | -0.05 | 1  | 0.86  | 0.91   | 0.08     | NA | NA | NA | NA |
| 0     | 0.01  | -0.02 | -0.01 | 1  | 1     | 0.44   | 0.87     | NA | NA | NA | NA |
| 0.01  | 0.12  | -0.04 | 0.02  | 1  | 0.037 | 0.039  | 0.35     | NA | NA | NA | NA |
| 0.03  | 0.13  | -0.05 | 0.02  | 1  | 0.22  | 0.012  | 0.56     | NA | NA | NA | NA |
| -0.01 | -0.02 | -0.06 | -0.01 | 1  | 1     | 0.061  | 0.98     | NA | NA | NA | NA |
| 0     | -0.04 | -0.03 | 0.01  | 1  | 0.38  | 0.075  | 0.38     | NA | NA | NA | NA |
| NA    | NA    | -0.01 | 0.13  | NA | NA    | 1      | 0.085    | NA | NA | NA | NA |
| NA    | NA    | NA    | NA    | NA | NA    | NA     | NA       | NA | NA | NA | NA |
| NA    | NA    | NA    | NA    | NA | NA    | NA     | NA       | NA | NA | NA | NA |
| NA    | 0.05  | -0.06 | -0.02 | NA | 0.16  | 0.0022 | 0.42     | NA | NA | NA | NA |
| NA    | NA    | -0.1  | 0.39  | NA | NA    | 0.37   | 0.33     | NA | NA | NA | NA |
| NA    | 0.94  | -0.03 | 0.04  | NA | 0.22  | 0.53   | 0.48     | NA | NA | NA | NA |
| NA    | -0.33 | -0.11 | NA    | NA | 0.65  | 0.49   | NA       | NA | NA | NA | NA |
| NA    | 0.03  | -0.07 | 0.1   | NA | 0.82  | 0.048  | 0.11     | NA | NA | NA | NA |
| NA    | 0.16  | -0.17 | 0.06  | NA | 0.97  | 0.0017 | 0.4      | NA | NA | NA | NA |
| NA    | NA    | 0.11  | NA    | NA | NA    | 1      | NA       | NA | NA | NA | NA |
| NA    | NA    | 0.08  | 0.2   | NA | NA    | 0.46   | 0.27     | NA | NA | NA | NA |
| NA    | NA    | -0.05 | 0     | NA | NA    | 0.3    | 1        | NA | NA | NA | NA |
| NA    | NA    | -0.18 | 0.06  | NA | NA    | 0.0043 | 0.48     | NA | NA | NA | NA |
| NA    | NA    | 0.05  | 0.06  | NA | NA    | 0.41   | 0.31     | NA | NA | NA | NA |
| NA    | NA    | 0     | 0.08  | NA | NA    | 1      | 0.084    | NA | NA | NA | NA |
| NA    | 0.29  | -0.02 | 0.02  | NA | 0.006 | 0.58   | 0.83     | NA | NA | NA | NA |
| NA    | 0.24  | -0.04 | 0.05  | NA | 0.063 | 0.12   | 0.093    | NA | NA | NA | NA |
| NA    | NA    | 0.05  | 0.4   | NA | NA    | 0.29   | 3.90E-06 | NA | NA | NA | NA |
| NA    | NA    | 0.01  | 0     | NA | NA    | 0.88   | 1        | NA | NA | NA | NA |
| NA    | NA    | 0.09  | NA    | NA | NA    | 0.18   | NA       | NA | NA | NA | NA |
| NA    | NA    | -0.16 | 0.5   | NA | NA    | 0.068  | 0.00083  | NA | NA | NA | NA |
| NA    | 0     | 0.5   | 0.57  | NA | 1     | 0.48   | 0.15     | NA | NA | NA | NA |
| NA    | NA    | 0.14  | NA    | NA | NA    | 0.099  | NA       | NA | NA | NA | NA |
| NA    | NA    | -0.01 | 0     | NA | NA    | 0.93   | 1        | NA | NA | NA | NA |



|    |       |       |       |    |          |          |          |    |    |    |    |
|----|-------|-------|-------|----|----------|----------|----------|----|----|----|----|
| NA | NA    | NA    | NA    | NA | NA       | NA       | NA       | NA | NA | NA | NA |
| NA | NA    | NA    | NA    | NA | NA       | NA       | NA       | NA | NA | NA | NA |
| NA | 0.08  | -0.01 | 0.36  | NA | 1        | 1        | 0.022    | NA | NA | NA | NA |
| NA | 0     | -0.13 | -0.03 | NA | 1        | 0.0081   | 0.85     | NA | NA | NA | NA |
| NA | 0.1   | -0.05 | -0.08 | NA | 0.73     | 0.33     | 0.2      | NA | NA | NA | NA |
| NA | 0.69  | -0.27 | 0.19  | NA | 0.054    | 9.10E-06 | 0.22     | NA | NA | NA | NA |
| NA | NA    | 0.12  | 0.16  | NA | NA       | 0.07     | 0.0075   | NA | NA | NA | NA |
| NA | NA    | -0.09 | -0.06 | NA | NA       | 0.069    | 0.47     | NA | NA | NA | NA |
| NA | 0.86  | 0.1   | NA    | NA | 6.30E-06 | 0.39     | NA       | NA | NA | NA | NA |
| NA | NA    | 0     | 0.14  | NA | NA       | 1        | 0.0092   | NA | NA | NA | NA |
| NA | 0.15  | -0.04 | -0.08 | NA | 0.9      | 0.44     | 0.14     | NA | NA | NA | NA |
| NA | NA    | NA    | NA    | NA | NA       | NA       | NA       | NA | NA | NA | NA |
| NA | NA    | NA    | NA    | NA | NA       | NA       | NA       | NA | NA | NA | NA |
| NA | 0.56  | -0.02 | 0.01  | NA | 1.10E-05 | 0.38     | 0.81     | NA | NA | NA | NA |
| NA | -0.43 | -0.08 | 0.07  | NA | 0.011    | 0.46     | 0.6      | NA | NA | NA | NA |
| NA | 0.83  | -0.07 | 0.28  | NA | 0.0044   | 0.092    | 3.30E-05 | NA | NA | NA | NA |
| NA | NA    | 0.03  | 0.29  | NA | NA       | 1        | 0.15     | NA | NA | NA | NA |
| NA | 0     | 0.07  | -0.02 | NA | 1        | 0.34     | 0.73     | NA | NA | NA | NA |
| NA | NA    | NA    | NA    | NA | NA       | NA       | NA       | NA | NA | NA | NA |
| NA | 0.04  | -0.07 | -0.05 | NA | 0.14     | 0.017    | 0.15     | NA | NA | NA | NA |
| NA | NA    | 0     | 0.15  | NA | NA       | 1        | 0.08     | NA | NA | NA | NA |
| NA | NA    | -0.33 | 0.05  | NA | NA       | 0.014    | 1        | NA | NA | NA | NA |
| NA | 0.03  | -0.09 | 0.11  | NA | 1        | 0.066    | 0.083    | NA | NA | NA | NA |
| NA | NA    | NA    | NA    | NA | NA       | NA       | NA       | NA | NA | NA | NA |
| NA | NA    | NA    | NA    | NA | NA       | NA       | NA       | NA | NA | NA | NA |
| NA | NA    | NA    | NA    | NA | NA       | NA       | NA       | NA | NA | NA | NA |
| NA | NA    | 0.03  | 0.12  | NA | NA       | 0.73     | 0.043    | NA | NA | NA | NA |
| NA | NA    | -0.21 | -0.04 | NA | NA       | 0.1      | 0.97     | NA | NA | NA | NA |
| NA | NA    | 0.01  | 0.23  | NA | NA       | 1        | 0.0094   | NA | NA | NA | NA |
| NA | 0.82  | 0.02  | 0.04  | NA | 0.0065   | 0.86     | 0.51     | NA | NA | NA | NA |

|       |       |       |       |          |          |         |          |    |    |    |    |
|-------|-------|-------|-------|----------|----------|---------|----------|----|----|----|----|
| NA    | NA    | 0.12  | NA    | NA       | NA       | 0.34    | NA       | NA | NA | NA | NA |
| NA    | NA    | NA    | NA    | NA       | NA       | NA      | NA       | NA | NA | NA | NA |
| NA    | 0.2   | 0     | NA    | NA       | 0.45     | 1       | NA       | NA | NA | NA | NA |
| NA    | NA    | 0.25  | NA    | NA       | NA       | 1       | NA       | NA | NA | NA | NA |
| NA    | 0.07  | -0.04 | 0.09  | NA       | 0.42     | 0.39    | 0.015    | NA | NA | NA | NA |
| NA    | NA    | -0.07 | NA    | NA       | NA       | 0.62    | NA       | NA | NA | NA | NA |
| NA    | NA    | -0.02 | 0.18  | NA       | NA       | 0.82    | 0.05     | NA | NA | NA | NA |
| NA    | -0.02 | -0.1  | -0.03 | NA       | 1        | 0.015   | 0.58     | NA | NA | NA | NA |
| NA    | NA    | -0.04 | 0.01  | NA       | NA       | 0.14    | 1        | NA | NA | NA | NA |
| NA    | -0.08 | -0.02 | 0.04  | NA       | 1        | 0.69    | 0.56     | NA | NA | NA | NA |
| NA    | -0.01 | -0.01 | 0.03  | NA       | 1        | 0.81    | 0.24     | NA | NA | NA | NA |
| NA    | NA    | -0.23 | NA    | NA       | NA       | 0.15    | NA       | NA | NA | NA | NA |
| NA    | NA    | 0     | 0     | NA       | NA       | 1       | 1        | NA | NA | NA | NA |
| NA    | NA    | -0.02 | 0     | NA       | NA       | 0.68    | 1        | NA | NA | NA | NA |
| NA    | NA    | -0.6  | NA    | NA       | NA       | 0.12    | NA       | NA | NA | NA | NA |
| NA    | NA    | -0.03 | 0     | NA       | NA       | 0.95    | 1        | NA | NA | NA | NA |
| NA    | NA    | -0.02 | 0.01  | NA       | NA       | 0.84    | 0.92     | NA | NA | NA | NA |
| NA    | NA    | -0.04 | -0.06 | NA       | NA       | 0.4     | 0.17     | NA | NA | NA | NA |
| NA    | 0.33  | 0.04  | NA    | NA       | 0.81     | 1       | NA       | NA | NA | NA | NA |
| NA    | 0.22  | 0.07  | 0.24  | NA       | 0.77     | 0.083   | 9.50E-07 | NA | NA | NA | NA |
| NA    | 0.56  | -0.18 | -0.11 | NA       | 3.80E-05 | 0.00042 | 0.1      | NA | NA | NA | NA |
| NA    | NA    | 0.07  | 0.17  | NA       | NA       | 0.39    | 0.0029   | NA | NA | NA | NA |
| NA    | 0.06  | -0.12 | 0.01  | NA       | 0.7      | 0.00027 | 0.87     | NA | NA | NA | NA |
| -0.49 | -0.39 | -0.11 | -0.07 | 8.60E-08 | 0.001    | 0.031   | 0.28     | NA | NA | NA | NA |
| 0.33  | -0.07 | -0.06 | 0.05  | 1.70E-07 | 0.043    | 0.044   | 0.14     | NA | NA | NA | NA |
| 0.2   | -0.01 | 0     | 0.06  | 1.80E-07 | 0.82     | 1       | 0.0011   | NA | NA | NA | NA |
| 0.11  | 0.08  | -0.01 | 0     | 2.40E-07 | 4.50E-05 | 0.55    | 0.81     | NA | NA | NA | NA |
| 0.19  | 0.02  | 0     | -0.04 | 3.10E-07 | 0.47     | 1       | 0.38     | NA | NA | NA | NA |
| 0.21  | 0.16  | -0.04 | 0.04  | 5.60E-07 | 1.30E-05 | 0.038   | 0.035    | NA | NA | NA | NA |
| 0.23  | 0.1   | -0.02 | 0.02  | 6.80E-07 | 0.0062   | 0.16    | 0.14     | NA | NA | NA | NA |

|       |       |       |       |          |          |          |          |    |    |    |    |
|-------|-------|-------|-------|----------|----------|----------|----------|----|----|----|----|
| 0.37  | 0.08  | -0.05 | 0     | 9.70E-07 | 0.052    | 0.012    | 0.91     | NA | NA | NA | NA |
| 0.18  | 0.04  | -0.06 | 0.04  | 2.60E-06 | 0.32     | 0.016    | 0.099    | NA | NA | NA | NA |
| 0.81  | 0     | -0.08 | 0.02  | 6.00E-06 | 1        | 0.013    | 0.63     | NA | NA | NA | NA |
| 0.14  | 0.07  | -0.08 | -0.06 | 6.50E-06 | 0.028    | 5.50E-08 | 0.0012   | NA | NA | NA | NA |
| 0.54  | 0.04  | -0.09 | -0.03 | 6.60E-06 | 0.81     | 0.0011   | 0.59     | NA | NA | NA | NA |
| 0.1   | 0.05  | -0.02 | 0.01  | 6.70E-06 | 0.031    | 0.12     | 0.71     | NA | NA | NA | NA |
| 0.68  | -0.07 | -0.06 | 0.1   | 7.90E-06 | 0.065    | 0.015    | 0.0025   | NA | NA | NA | NA |
| 0.1   | 0.05  | -0.02 | 0.06  | 8.40E-06 | 0.008    | 0.32     | 0.00089  | NA | NA | NA | NA |
| 0.12  | 0.01  | -0.03 | 0.03  | 9.70E-06 | 0.86     | 0.038    | 0.19     | NA | NA | NA | NA |
| 0.42  | 0.09  | -0.02 | 0.06  | 1.30E-05 | 0.24     | 0.62     | 0.16     | NA | NA | NA | NA |
| 0.21  | 0.2   | -0.01 | 0.03  | 2.20E-05 | 2.50E-06 | 0.76     | 0.066    | NA | NA | NA | NA |
| 0.3   | 0.22  | 0     | 0.08  | 3.50E-05 | 0.0023   | 1        | 0.0097   | NA | NA | NA | NA |
| 0.16  | 0.06  | -0.07 | 0     | 4.10E-05 | 0.031    | 0.00042  | 1        | NA | NA | NA | NA |
| -0.11 | -0.04 | -0.03 | 0     | 4.50E-05 | 0.2      | 0.042    | 1        | NA | NA | NA | NA |
| 0.72  | 0.15  | -0.02 | 0.04  | 5.50E-05 | 0.01     | 0.32     | 0.18     | NA | NA | NA | NA |
| 0.25  | 0.22  | -0.02 | -0.03 | 6.30E-05 | 4.70E-06 | 0.5      | 0.45     | NA | NA | NA | NA |
| 0.24  | 0.12  | -0.01 | 0.06  | 6.30E-05 | 7.20E-06 | 0.27     | 9.60E-07 | NA | NA | NA | NA |
| 0.37  | 0.17  | -0.1  | 0.02  | 7.30E-05 | 0.045    | 0.077    | 0.8      | NA | NA | NA | NA |
| 0.12  | 0.06  | -0.01 | 0.05  | 0.00013  | 0.021    | 0.52     | 0.00084  | NA | NA | NA | NA |
| 0.52  | -0.05 | -0.07 | 0.01  | 0.00014  | 0.77     | 0.012    | 0.84     | NA | NA | NA | NA |
| 0.11  | 0.05  | -0.03 | -0.01 | 0.00015  | 0.0074   | 0.098    | 0.52     | NA | NA | NA | NA |
| 0.17  | 0.27  | -0.04 | -0.02 | 0.00023  | 1.50E-08 | 0.01     | 0.35     | NA | NA | NA | NA |
| 0.17  | 0.09  | 0     | 0     | 0.00023  | 0.0021   | 0.95     | 0.81     | NA | NA | NA | NA |
| 0.2   | 0.04  | -0.07 | 0.04  | 0.00025  | 0.27     | 0.087    | 0.44     | NA | NA | NA | NA |
| 0.61  | 0.13  | -0.14 | 0.06  | 0.00027  | 0.48     | 0.0049   | 0.55     | NA | NA | NA | NA |
| 0.11  | 0.02  | -0.08 | -0.06 | 0.00027  | 0.66     | 0.021    | 0.085    | NA | NA | NA | NA |
| 0.37  | 0.25  | -0.01 | 0.09  | 0.00028  | 0.0039   | 0.9      | 0.00017  | NA | NA | NA | NA |
| 0.61  | 0.49  | 0.01  | 0.09  | 0.00028  | 0.0042   | 0.9      | 0.15     | NA | NA | NA | NA |
| 0.15  | 0.07  | -0.02 | -0.04 | 0.00039  | 0.04     | 0.43     | 0.22     | NA | NA | NA | NA |
| 0.18  | 0.07  | -0.04 | 0.09  | 0.00052  | 0.086    | 0.11     | 0.016    | NA | NA | NA | NA |

|       |       |       |       |         |          |          |         |    |    |    |    |
|-------|-------|-------|-------|---------|----------|----------|---------|----|----|----|----|
| 0.17  | 0.06  | -0.08 | 0     | 0.00053 | 0.047    | 3.60E-05 | 0.9     | NA | NA | NA | NA |
| -0.18 | -0.09 | -0.01 | -0.01 | 0.00054 | 0.19     | 0.69     | 0.72    | NA | NA | NA | NA |
| 0.18  | 0.08  | 0.02  | 0.07  | 0.00059 | 0.013    | 0.25     | 0.0017  | NA | NA | NA | NA |
| 0.11  | 0.04  | -0.01 | 0.03  | 0.00061 | 0.13     | 0.71     | 0.18    | NA | NA | NA | NA |
| 0.14  | 0     | -0.05 | 0.04  | 0.00063 | 0.99     | 0.00093  | 0.0096  | NA | NA | NA | NA |
| 0.24  | -0.02 | -0.01 | 0.08  | 0.00067 | 0.72     | 0.7      | 0.0065  | NA | NA | NA | NA |
| -0.88 | -0.82 | -0.06 | 0.02  | 0.00071 | 0.00078  | 0.0013   | 0.42    | NA | NA | NA | NA |
| 0.14  | 0.09  | 0.07  | 0.08  | 0.00073 | 0.0055   | 0.0047   | 0.0041  | NA | NA | NA | NA |
| 0.09  | 0.07  | -0.02 | 0     | 0.00074 | 0.0018   | 0.11     | 0.85    | NA | NA | NA | NA |
| 0.17  | 0.01  | -0.08 | -0.03 | 0.00075 | 0.91     | 0.034    | 0.57    | NA | NA | NA | NA |
| 0.31  | 0.21  | 0.05  | 0.01  | 0.00082 | 0.012    | 0.3      | 0.82    | NA | NA | NA | NA |
| -0.16 | -0.11 | -0.06 | 0.01  | 0.00085 | 0.0057   | 0.0025   | 0.53    | NA | NA | NA | NA |
| 0.19  | 0.02  | -0.02 | 0.03  | 0.00089 | 0.49     | 0.2      | 0.077   | NA | NA | NA | NA |
| 0.11  | 0.04  | -0.01 | 0.03  | 0.00092 | 0.11     | 0.59     | 0.14    | NA | NA | NA | NA |
| 0.26  | -0.01 | -0.14 | 0.1   | 0.0011  | 1        | 4.50E-08 | 0.0046  | NA | NA | NA | NA |
| 0.2   | 0.17  | -0.04 | 0.03  | 0.0011  | 0.00053  | 0.067    | 0.3     | NA | NA | NA | NA |
| 0.19  | 0.14  | -0.08 | -0.01 | 0.0012  | 0.0011   | 3.00E-06 | 0.63    | NA | NA | NA | NA |
| 0.11  | -0.01 | -0.07 | 0     | 0.0012  | 0.6      | 2.20E-09 | 0.78    | NA | NA | NA | NA |
| 0.3   | -0.01 | 0.01  | 0.05  | 0.0017  | 1        | 0.85     | 0.14    | NA | NA | NA | NA |
| 0.11  | 0.07  | 0     | 0.03  | 0.0019  | 0.054    | 1        | 0.18    | NA | NA | NA | NA |
| 0.05  | 0.05  | -0.04 | -0.01 | 0.0019  | 0.0034   | 5.50E-05 | 0.37    | NA | NA | NA | NA |
| 0.08  | 0     | -0.01 | 0.02  | 0.0021  | 1        | 0.29     | 0.32    | NA | NA | NA | NA |
| 0.26  | -0.2  | -0.03 | 0.13  | 0.0022  | 5.80E-07 | 0.46     | 0.00038 | NA | NA | NA | NA |
| 0.19  | 0.03  | -0.02 | 0.05  | 0.0023  | 0.66     | 0.56     | 0.044   | NA | NA | NA | NA |
| 0.51  | 0.01  | -0.03 | 0.01  | 0.0025  | 1        | 0.26     | 0.82    | NA | NA | NA | NA |
| 0.46  | 0.18  | -0.01 | 0.29  | 0.0027  | 0.65     | 1        | 0.0071  | NA | NA | NA | NA |
| 0.32  | 0.24  | -0.03 | 0.11  | 0.0027  | 0.018    | 0.53     | 0.098   | NA | NA | NA | NA |
| 0.43  | 0.17  | -0.06 | 0.07  | 0.0028  | 0.035    | 0.044    | 0.076   | NA | NA | NA | NA |
| 0.9   | 0.09  | -0.04 | -0.04 | 0.0028  | 0.045    | 0.21     | 0.15    | NA | NA | NA | NA |
| 0.34  | -0.03 | -0.03 | 0.04  | 0.0028  | 0.51     | 0.1      | 0.037   | NA | NA | NA | NA |

|       |       |       |       |        |          |          |          |    |    |    |    |
|-------|-------|-------|-------|--------|----------|----------|----------|----|----|----|----|
| 0.07  | 0.1   | -0.02 | 0.02  | 0.0028 | 9.10E-06 | 0.18     | 0.17     | NA | NA | NA | NA |
| 0.2   | 0     | 0.02  | 0.09  | 0.0032 | 1        | 0.45     | 0.00097  | NA | NA | NA | NA |
| -0.23 | 0.21  | 0.03  | 0.01  | 0.0033 | 0.024    | 0.65     | 0.79     | NA | NA | NA | NA |
| 0.55  | 0.21  | 0.12  | 0     | 0.0036 | 0.35     | 0.27     | 1        | NA | NA | NA | NA |
| -0.16 | -0.02 | -0.06 | 0.06  | 0.0037 | 0.64     | 0.038    | 0.088    | NA | NA | NA | NA |
| 0.12  | 0     | -0.02 | 0     | 0.004  | 1        | 0.22     | 0.8      | NA | NA | NA | NA |
| 0.1   | -0.03 | -0.04 | 0.03  | 0.0041 | 0.4      | 0.012    | 0.13     | NA | NA | NA | NA |
| -0.22 | -0.1  | -0.23 | -0.16 | 0.0043 | 0.13     | 2.30E-08 | 6.50E-05 | NA | NA | NA | NA |
| -0.12 | 0.1   | 0     | 0.02  | 0.0045 | 0.09     | 1        | 0.48     | NA | NA | NA | NA |
| 0.15  | 0.19  | -0.07 | -0.09 | 0.0045 | 1.40E-07 | 0.00024  | 6.40E-06 | NA | NA | NA | NA |
| 0.26  | 0.05  | -0.05 | 0.02  | 0.0046 | 0.84     | 0.39     | 0.96     | NA | NA | NA | NA |
| 0.22  | -0.02 | -0.04 | 0.01  | 0.0047 | 0.81     | 0.083    | 0.82     | NA | NA | NA | NA |
| 0.13  | 0     | 0     | 0     | 0.0051 | 1        | 1        | 0.98     | NA | NA | NA | NA |
| 0.23  | 0     | -0.11 | 0.03  | 0.0053 | 1        | 2.00E-05 | 0.35     | NA | NA | NA | NA |
| 0.09  | 0.13  | -0.01 | 0.08  | 0.0053 | 3.20E-05 | 0.73     | 6.10E-05 | NA | NA | NA | NA |
| 0.12  | 0.14  | -0.06 | 0.03  | 0.0064 | 0.0019   | 0.00028  | 0.21     | NA | NA | NA | NA |
| 0.89  | 0.39  | -0.09 | 0.33  | 0.0065 | 5.30E-05 | 0.047    | 0.0026   | NA | NA | NA | NA |
| -0.05 | -0.03 | -0.08 | -0.04 | 0.0065 | 0.17     | 4.80E-06 | 0.0075   | NA | NA | NA | NA |
| 0.88  | 0.22  | -0.06 | 0.08  | 0.0071 | 0.006    | 0.036    | 0.74     | NA | NA | NA | NA |
| 0.95  | 0.14  | -0.1  | -0.08 | 0.008  | 0.24     | 0.00086  | 0.015    | NA | NA | NA | NA |
| 0.11  | -0.01 | -0.06 | -0.05 | 0.008  | 0.75     | 0.012    | 0.025    | NA | NA | NA | NA |
| 0.06  | 0.04  | -0.03 | -0.02 | 0.008  | 0.07     | 0.07     | 0.23     | NA | NA | NA | NA |
| 0.15  | 0.1   | -0.08 | 0.21  | 0.0082 | 0.099    | 0.043    | 2.00E-06 | NA | NA | NA | NA |
| 0.89  | -0.01 | 0.05  | 0.06  | 0.0087 | 0.99     | 0.21     | 0.031    | NA | NA | NA | NA |
| 0.1   | 0.01  | -0.01 | 0.03  | 0.0088 | 0.87     | 0.44     | 0.0046   | NA | NA | NA | NA |
| -0.16 | -0.22 | 0.03  | 0.14  | 0.0089 | 9.40E-06 | 0.29     | 8.20E-05 | NA | NA | NA | NA |
| 0.08  | -0.02 | -0.06 | 0.01  | 0.0091 | 0.51     | 0.00012  | 0.7      | NA | NA | NA | NA |
| 0.09  | 0.02  | -0.06 | -0.01 | 0.0092 | 0.4      | 2.60E-06 | 0.24     | NA | NA | NA | NA |
| 0.78  | 0.03  | -0.1  | 0.22  | 0.0092 | 1        | 0.0041   | 0.00041  | NA | NA | NA | NA |
| 0.66  | 0.08  | -0.13 | -0.05 | 0.0099 | 0.57     | 0.051    | 0.69     | NA | NA | NA | NA |

|       |       |       |       |       |          |         |          |    |    |    |    |
|-------|-------|-------|-------|-------|----------|---------|----------|----|----|----|----|
| 0.12  | 0.07  | -0.04 | 0.04  | 0.01  | 0.005    | 0.00035 | 0.0018   | NA | NA | NA | NA |
| 0.19  | 0.02  | 0.04  | 0.05  | 0.01  | 0.92     | 0.051   | 0.022    | NA | NA | NA | NA |
| 0.09  | 0.06  | -0.04 | -0.02 | 0.011 | 0.024    | 0.0046  | 0.33     | NA | NA | NA | NA |
| 0.1   | 0.09  | -0.04 | 0     | 0.011 | 0.013    | 0.00035 | 0.85     | NA | NA | NA | NA |
| 0.08  | 0     | -0.06 | 0.02  | 0.011 | 1        | 0.00042 | 0.41     | NA | NA | NA | NA |
| 0.4   | -0.09 | -0.06 | 0.02  | 0.011 | 0.068    | 0.063   | 0.65     | NA | NA | NA | NA |
| 0.05  | 0.05  | -0.01 | -0.02 | 0.012 | 0.0038   | 0.59    | 0.19     | NA | NA | NA | NA |
| 0.14  | 0.21  | -0.06 | -0.05 | 0.012 | 0.0012   | 0.07    | 0.035    | NA | NA | NA | NA |
| 0.06  | 0.04  | -0.01 | -0.01 | 0.013 | 0.07     | 0.65    | 0.62     | NA | NA | NA | NA |
| -0.05 | -0.04 | -0.02 | -0.01 | 0.014 | 0.079    | 0.077   | 0.42     | NA | NA | NA | NA |
| 0.12  | 0     | -0.06 | 0     | 0.014 | 1        | 0.00036 | 0.99     | NA | NA | NA | NA |
| 0.07  | -0.04 | -0.05 | -0.03 | 0.014 | 0.042    | 0.00078 | 0.046    | NA | NA | NA | NA |
| -0.09 | -0.09 | -0.01 | 0.08  | 0.015 | 0.02     | 0.49    | 7.30E-05 | NA | NA | NA | NA |
| -0.05 | -0.06 | -0.02 | 0.02  | 0.015 | 0.001    | 0.14    | 0.13     | NA | NA | NA | NA |
| 0.14  | 0.14  | 0.02  | 0.05  | 0.015 | 0.092    | 0.52    | 0.032    | NA | NA | NA | NA |
| -0.24 | -0.2  | -0.09 | 0.06  | 0.015 | 0.056    | 0.0084  | 0.13     | NA | NA | NA | NA |
| 0.27  | 0.11  | 0.02  | 0.09  | 0.017 | 0.19     | 0.43    | 0.00027  | NA | NA | NA | NA |
| 0.25  | 0.2   | 0.02  | 0.03  | 0.017 | 0.0037   | 0.67    | 0.46     | NA | NA | NA | NA |
| 0.07  | 0.04  | -0.07 | 0     | 0.017 | 0.15     | 0.0056  | 1        | NA | NA | NA | NA |
| 0.04  | 0.01  | 0.03  | 0.05  | 0.018 | 0.27     | 0.021   | 1.70E-06 | NA | NA | NA | NA |
| 0.13  | 0.09  | -0.02 | 0.12  | 0.018 | 0.077    | 0.17    | 2.10E-09 | NA | NA | NA | NA |
| 0.14  | 0.01  | -0.01 | 0     | 0.018 | 0.95     | 0.71    | 0.88     | NA | NA | NA | NA |
| 0.14  | 0.29  | -0.01 | 0.1   | 0.018 | 4.10E-06 | 0.77    | 0.00018  | NA | NA | NA | NA |
| 0.33  | 0.04  | 0     | 0.12  | 0.018 | 0.77     | 1       | 0.019    | NA | NA | NA | NA |
| 0.22  | -0.05 | -0.08 | 0.09  | 0.019 | 0.97     | 0.045   | 0.2      | NA | NA | NA | NA |
| 0.13  | 0.02  | 0     | 0     | 0.019 | 0.55     | 1       | 0.96     | NA | NA | NA | NA |
| -0.07 | -0.09 | 0     | 0.04  | 0.019 | 0.074    | 0.93    | 0.25     | NA | NA | NA | NA |
| -0.16 | -0.02 | 0     | 0     | 0.019 | 0.89     | 1       | 0.98     | NA | NA | NA | NA |
| 0.26  | -0.04 | 0.03  | -0.02 | 0.021 | 0.81     | 0.43    | 0.57     | NA | NA | NA | NA |
| 0.14  | 0.11  | 0.02  | 0.07  | 0.021 | 0.047    | 0.18    | 3.90E-05 | NA | NA | NA | NA |

|       |       |       |       |       |          |          |          |    |    |    |    |
|-------|-------|-------|-------|-------|----------|----------|----------|----|----|----|----|
| 0.06  | 0.03  | -0.05 | -0.04 | 0.022 | 0.08     | 0.013    | 0.045    | NA | NA | NA | NA |
| 0.12  | 0.03  | -0.05 | -0.03 | 0.022 | 0.39     | 0.18     | 0.36     | NA | NA | NA | NA |
| 0.15  | 0.09  | -0.05 | 0.01  | 0.022 | 0.077    | 0.0036   | 0.56     | NA | NA | NA | NA |
| 0.09  | 0.04  | -0.04 | 0.03  | 0.023 | 0.052    | 0.031    | 0.24     | NA | NA | NA | NA |
| -0.25 | -0.23 | -0.03 | 0.17  | 0.023 | 0.0059   | 0.4      | 0.00037  | NA | NA | NA | NA |
| 0.07  | 0.05  | -0.05 | 0     | 0.023 | 0.022    | 0.0036   | 0.84     | NA | NA | NA | NA |
| -0.83 | -0.74 | -0.09 | 0.05  | 0.023 | 0.039    | 0.013    | 0.35     | NA | NA | NA | NA |
| 0.33  | 0.32  | 0.19  | 0.27  | 0.024 | 0.0035   | 0.0031   | 3.60E-05 | NA | NA | NA | NA |
| -0.09 | 0.02  | 0.01  | 0.01  | 0.024 | 0.61     | 0.54     | 0.73     | NA | NA | NA | NA |
| -0.1  | -0.17 | 0.02  | -0.01 | 0.025 | 0.00016  | 0.54     | 0.9      | NA | NA | NA | NA |
| 0.07  | 0.01  | -0.04 | 0.01  | 0.025 | 0.71     | 0.063    | 0.77     | NA | NA | NA | NA |
| 0.06  | 0.03  | -0.04 | 0.01  | 0.027 | 0.21     | 0.02     | 0.8      | NA | NA | NA | NA |
| 0.21  | 0.15  | 0.03  | 0.01  | 0.028 | 0.00025  | 0.36     | 0.73     | NA | NA | NA | NA |
| -0.13 | -0.11 | -0.05 | 0.09  | 0.028 | 0.021    | 0.062    | 0.018    | NA | NA | NA | NA |
| 0.11  | 0.22  | -0.04 | -0.01 | 0.029 | 0.00029  | 0.07     | 0.81     | NA | NA | NA | NA |
| 0.1   | 0.04  | 0.03  | 0.02  | 0.03  | 0.31     | 0.35     | 0.62     | NA | NA | NA | NA |
| 0.08  | -0.01 | -0.08 | 0.01  | 0.03  | 0.8      | 1.20E-06 | 0.63     | NA | NA | NA | NA |
| 0.06  | 0.04  | -0.06 | -0.05 | 0.032 | 0.0056   | 1.00E-05 | 0.001    | NA | NA | NA | NA |
| 0.15  | 0.31  | 0.11  | 0.14  | 0.033 | 5.10E-09 | 0.062    | 0.074    | NA | NA | NA | NA |
| 0.15  | 0.05  | -0.01 | 0.06  | 0.034 | 0.19     | 0.65     | 0.023    | NA | NA | NA | NA |
| 0.06  | -0.01 | -0.02 | 0.03  | 0.034 | 0.61     | 0.18     | 0.021    | NA | NA | NA | NA |
| 0.11  | 0.06  | -0.02 | 0.07  | 0.034 | 0.19     | 0.92     | 0.36     | NA | NA | NA | NA |
| 0.04  | 0.07  | -0.02 | 0     | 0.036 | 4.80E-05 | 0.14     | 0.92     | NA | NA | NA | NA |
| 0.11  | 0.13  | 0     | 0.02  | 0.036 | 0.002    | 0.87     | 0.34     | NA | NA | NA | NA |
| -0.1  | -0.06 | -0.06 | 0.02  | 0.038 | 0.12     | 0.0063   | 0.36     | NA | NA | NA | NA |
| -0.23 | -0.18 | 0.05  | 0.11  | 0.038 | 0.046    | 0.13     | 0.0065   | NA | NA | NA | NA |
| 0.06  | 0.13  | -0.04 | -0.01 | 0.04  | 1.30E-06 | 0.092    | 0.71     | NA | NA | NA | NA |
| -0.11 | -0.02 | -0.02 | 0.05  | 0.042 | 0.57     | 0.44     | 0.04     | NA | NA | NA | NA |
| -0.14 | -0.16 | -0.01 | 0.05  | 0.043 | 0.00032  | 0.66     | 0.072    | NA | NA | NA | NA |
| -0.25 | -0.23 | -0.21 | -0.26 | 0.043 | 0.011    | 0.0065   | 0.0012   | NA | NA | NA | NA |

|       |       |       |       |       |          |          |          |    |    |    |    |
|-------|-------|-------|-------|-------|----------|----------|----------|----|----|----|----|
| 0.1   | 0.03  | -0.02 | 0.06  | 0.044 | 0.58     | 0.46     | 0.011    | NA | NA | NA | NA |
| 0.19  | 0.01  | -0.05 | -0.02 | 0.044 | 1        | 0.028    | 0.73     | NA | NA | NA | NA |
| 0.17  | 0.11  | -0.07 | 0.06  | 0.044 | 0.31     | 0.034    | 0.25     | NA | NA | NA | NA |
| 0.15  | -0.14 | 0.02  | 0.06  | 0.044 | 0.0069   | 0.38     | 0.039    | NA | NA | NA | NA |
| 0.04  | 0.01  | -0.01 | 0.04  | 0.045 | 0.81     | 0.31     | 0.00094  | NA | NA | NA | NA |
| 0.07  | 0     | -0.03 | 0.03  | 0.047 | 1        | 0.14     | 0.12     | NA | NA | NA | NA |
| 0.13  | 0.06  | -0.04 | -0.02 | 0.048 | 0.4      | 0.038    | 0.31     | NA | NA | NA | NA |
| -0.13 | -0.27 | -0.19 | -0.11 | 0.048 | 0.00016  | 0.00011  | 0.036    | NA | NA | NA | NA |
| 0.14  | -0.05 | 0.02  | 0.07  | 0.051 | 0.31     | 0.41     | 0.00042  | NA | NA | NA | NA |
| 0.05  | 0.02  | -0.03 | 0.02  | 0.051 | 0.25     | 0.0081   | 0.25     | NA | NA | NA | NA |
| 0.11  | 0.02  | -0.01 | 0.03  | 0.052 | 0.71     | 0.88     | 0.18     | NA | NA | NA | NA |
| 0.07  | 0.07  | -0.04 | 0     | 0.054 | 0.012    | 0.016    | 1        | NA | NA | NA | NA |
| -0.15 | -0.12 | -0.08 | -0.12 | 0.055 | 0.14     | 0.041    | 0.003    | NA | NA | NA | NA |
| 0.55  | -0.14 | 0.01  | 0     | 0.055 | 0.16     | 0.83     | 1        | NA | NA | NA | NA |
| 0.17  | -0.06 | -0.16 | -0.16 | 0.056 | 0.61     | 0.022    | 0.021    | NA | NA | NA | NA |
| -0.13 | -0.07 | -0.1  | -0.03 | 0.056 | 0.34     | 0.00024  | 0.36     | NA | NA | NA | NA |
| 0.08  | 0.07  | -0.07 | -0.01 | 0.056 | 0.025    | 0.0023   | 0.73     | NA | NA | NA | NA |
| 0.14  | 0     | -0.05 | 0     | 0.057 | 1        | 0.0025   | 0.92     | NA | NA | NA | NA |
| 0.12  | 0.37  | -0.03 | -0.09 | 0.058 | 1.70E-08 | 0.63     | 0.014    | NA | NA | NA | NA |
| 0.21  | 0.26  | -0.1  | 0.02  | 0.059 | 0.0088   | 0.034    | 0.74     | NA | NA | NA | NA |
| -0.05 | -0.04 | 0.03  | 0.05  | 0.06  | 0.11     | 0.0026   | 1.10E-05 | NA | NA | NA | NA |
| 0.03  | -0.01 | -0.03 | 0     | 0.061 | 0.53     | 0.016    | 0.98     | NA | NA | NA | NA |
| 0.03  | 0.02  | -0.01 | 0.03  | 0.062 | 0.23     | 0.47     | 0.017    | NA | NA | NA | NA |
| -0.39 | -0.34 | -0.12 | -0.11 | 0.063 | 0.11     | 0.46     | 0.51     | NA | NA | NA | NA |
| -0.17 | -0.41 | -0.05 | 0.1   | 0.064 | 3.20E-05 | 0.64     | 0.29     | NA | NA | NA | NA |
| -0.24 | -0.01 | -0.22 | -0.1  | 0.065 | 1        | 0.0027   | 0.17     | NA | NA | NA | NA |
| 0.39  | NA    | -0.02 | 0.05  | 0.065 | NA       | 0.79     | 0.39     | NA | NA | NA | NA |
| 0.11  | -0.02 | -0.05 | 0.03  | 0.066 | 0.74     | 0.014    | 0.17     | NA | NA | NA | NA |
| -0.07 | 0.13  | -0.13 | -0.15 | 0.067 | 5.00E-05 | 1.10E-06 | 5.50E-09 | NA | NA | NA | NA |
| -0.1  | -0.06 | -0.09 | -0.02 | 0.07  | 0.2      | 0.00018  | 0.6      | NA | NA | NA | NA |



|       |       |       |       |       |          |          |        |    |    |    |    |
|-------|-------|-------|-------|-------|----------|----------|--------|----|----|----|----|
| -0.06 | -0.03 | 0     | 0.03  | 0.071 | 0.37     | 0.98     | 0.054  | NA | NA | NA | NA |
| 0.06  | 0.1   | -0.08 | -0.02 | 0.074 | 2.20E-05 | 2.60E-06 | 0.4    | NA | NA | NA | NA |
| 0.11  | 0.03  | -0.09 | -0.01 | 0.074 | 0.48     | 2.30E-06 | 0.58   | NA | NA | NA | NA |
| 0.03  | 0.04  | -0.06 | -0.01 | 0.076 | 0.03     | 1.00E-09 | 0.58   | NA | NA | NA | NA |
| 0.07  | 0.2   | -0.02 | 0.05  | 0.079 | 5.40E-06 | 0.24     | 0.0042 | NA | NA | NA | NA |
| -0.07 | -0.03 | -0.11 | -0.02 | 0.082 | 0.77     | 0.00031  | 0.55   | NA | NA | NA | NA |
| 0.05  | 0.03  | -0.01 | 0     | 0.084 | 0.11     | 0.71     | 0.92   | NA | NA | NA | NA |
| 0.13  | 0.08  | -0.08 | -0.05 | 0.085 | 0.41     | 0.0018   | 0.086  | NA | NA | NA | NA |
| 0.13  | 0.15  | -0.06 | 0     | 0.087 | 0.03     | 0.0045   | 1      | NA | NA | NA | NA |
| 0.09  | 0.06  | -0.05 | -0.03 | 0.087 | 0.03     | 0.03     | 0.39   | NA | NA | NA | NA |
| 0.05  | 0.01  | -0.08 | -0.01 | 0.088 | 0.8      | 5.40E-07 | 0.76   | NA | NA | NA | NA |
| 0.11  | 0.29  | -0.08 | -0.06 | 0.089 | 8.30E-08 | 0.0015   | 0.037  | NA | NA | NA | NA |
| 0.08  | 0.04  | -0.04 | 0.03  | 0.09  | 0.4      | 0.0045   | 0.083  | NA | NA | NA | NA |
| 0.07  | 0.05  | -0.06 | 0.03  | 0.09  | 0.39     | 0.0065   | 0.35   | NA | NA | NA | NA |
| 0.08  | 0.15  | -0.08 | -0.01 | 0.091 | 0.003    | 0.00074  | 0.72   | NA | NA | NA | NA |
| 0.28  | 0.03  | -0.15 | 0.01  | 0.091 | 1        | 0.014    | 1      | NA | NA | NA | NA |
| -0.11 | -0.05 | -0.02 | 0.01  | 0.092 | 0.49     | 0.22     | 0.58   | NA | NA | NA | NA |
| 0.13  | 0.16  | -0.05 | 0.01  | 0.093 | 0.018    | 0.65     | 1      | NA | NA | NA | NA |
| 0.05  | 0.04  | -0.07 | 0     | 0.094 | 0.03     | 1.10E-05 | 0.96   | NA | NA | NA | NA |
| 0.08  | -0.08 | 0.02  | 0.05  | 0.096 | 0.012    | 0.38     | 0.0029 | NA | NA | NA | NA |
| 0.08  | 0.03  | -0.05 | 0.02  | 0.097 | 0.37     | 0.063    | 0.57   | NA | NA | NA | NA |
| 0.08  | 0.06  | -0.05 | 0.02  | 0.097 | 0.13     | 0.0031   | 0.37   | NA | NA | NA | NA |
| 0.13  | 0.13  | 0.04  | 0.06  | 0.097 | 0.015    | 0.2      | 0.027  | NA | NA | NA | NA |
| 0.93  | 0.01  | -0.06 | -0.04 | 0.098 | 0.9      | 0.0039   | 0.07   | NA | NA | NA | NA |
| 0.07  | 0.01  | -0.03 | 0.04  | 0.098 | 0.92     | 0.089    | 0.028  | NA | NA | NA | NA |
| 0.06  | 0.08  | -0.07 | -0.03 | 0.098 | 0.042    | 2.30E-06 | 0.077  | NA | NA | NA | NA |
| 0.04  | 0.06  | -0.04 | -0.04 | 0.099 | 0.009    | 0.12     | 0.048  | NA | NA | NA | NA |
| 0.05  | 0.11  | -0.03 | 0.03  | 0.1   | 3.20E-05 | 0.088    | 0.095  | NA | NA | NA | NA |
| 0.04  | 0.04  | -0.06 | 0.01  | 0.1   | 0.016    | 1.60E-07 | 0.35   | NA | NA | NA | NA |
| 0.11  | 0.08  | 0.01  | -0.03 | 0.11  | 0.074    | 1        | 0.4    | NA | NA | NA | NA |

|       |       |       |       |      |          |          |          |    |    |    |    |
|-------|-------|-------|-------|------|----------|----------|----------|----|----|----|----|
| 0.07  | 0.03  | 0     | 0.11  | 0.12 | 0.45     | 1        | 3.80E-06 | NA | NA | NA | NA |
| 0.04  | 0.01  | 0     | 0     | 0.12 | 0.55     | 0.93     | 0.83     | NA | NA | NA | NA |
| 0.93  | 0     | -0.05 | 0.02  | 0.12 | 1        | 0.46     | 0.78     | NA | NA | NA | NA |
| 0.06  | 0.01  | -0.04 | 0.07  | 0.13 | 0.91     | 0.041    | 0.001    | NA | NA | NA | NA |
| -0.05 | -0.09 | 0     | 0.06  | 0.13 | 0.0022   | 0.82     | 0.0014   | NA | NA | NA | NA |
| 0.05  | 0.22  | -0.06 | 0.04  | 0.13 | 2.70E-08 | 0.00031  | 0.094    | NA | NA | NA | NA |
| 0.14  | 0.08  | -0.02 | 0.02  | 0.13 | 0.41     | 0.35     | 0.73     | NA | NA | NA | NA |
| 0.12  | -0.16 | 0     | 0.04  | 0.13 | 3.00E-06 | 0.95     | 0.21     | NA | NA | NA | NA |
| -0.1  | -0.16 | -0.07 | 0.03  | 0.14 | 3.70E-05 | 0.0025   | 0.39     | NA | NA | NA | NA |
| 0.39  | 0.19  | -0.08 | 0.06  | 0.14 | 0.65     | 0.0054   | 0.14     | NA | NA | NA | NA |
| -0.09 | -0.11 | -0.02 | 0.03  | 0.14 | 0.26     | 0.74     | 0.38     | NA | NA | NA | NA |
| 0.1   | 0.06  | -0.11 | -0.03 | 0.14 | 0.49     | 2.50E-06 | 0.31     | NA | NA | NA | NA |
| 0.12  | 0.11  | 0     | 0.01  | 0.14 | 0.00022  | 0.88     | 0.6      | NA | NA | NA | NA |
| -0.07 | -0.02 | -0.03 | 0.02  | 0.14 | 0.67     | 0.37     | 0.37     | NA | NA | NA | NA |
| -0.13 | -0.14 | 0.05  | 0.14  | 0.14 | 0.01     | 0.07     | 3.80E-08 | NA | NA | NA | NA |
| 0.17  | 0.04  | -0.05 | -0.08 | 0.15 | 0.48     | 0.056    | 0.0032   | NA | NA | NA | NA |
| 0.16  | 0.32  | 0     | 0.07  | 0.15 | 0.0036   | 1        | 0.018    | NA | NA | NA | NA |
| 0.23  | 0.56  | -0.04 | 0.09  | 0.15 | 0.0015   | 0.51     | 0.18     | NA | NA | NA | NA |
| 0.3   | -0.06 | 0.03  | 0.32  | 0.15 | 0.8      | 0.78     | 1.20E-07 | NA | NA | NA | NA |
| -0.07 | -0.1  | -0.18 | -0.14 | 0.15 | 0.02     | 2.70E-08 | 0.00012  | NA | NA | NA | NA |
| -0.04 | 0.04  | -0.07 | -0.01 | 0.15 | 0.19     | 4.90E-08 | 0.41     | NA | NA | NA | NA |
| 0.11  | 0.18  | -0.01 | 0.07  | 0.15 | 0.02     | 0.76     | 0.0069   | NA | NA | NA | NA |
| 0.22  | 0.07  | -0.06 | 0.07  | 0.15 | 0.64     | 0.057    | 0.03     | NA | NA | NA | NA |
| 0.06  | 0.05  | -0.02 | -0.01 | 0.15 | 0.33     | 0.46     | 0.67     | NA | NA | NA | NA |
| -0.04 | 0.01  | -0.02 | 0.03  | 0.16 | 0.79     | 0.3      | 0.19     | NA | NA | NA | NA |
| 0.36  | 0.22  | 0.04  | 0.04  | 0.16 | 0.38     | 0.23     | 0.74     | NA | NA | NA | NA |
| 0.12  | -0.01 | -0.03 | 0.06  | 0.17 | 1        | 0.28     | 0.077    | NA | NA | NA | NA |
| -0.2  | -0.17 | -0.01 | 0.07  | 0.17 | 0.025    | 0.75     | 0.037    | NA | NA | NA | NA |
| 0.14  | 0.01  | -0.02 | 0.1   | 0.18 | 0.92     | 0.58     | 9.90E-05 | NA | NA | NA | NA |
| 0.07  | -0.03 | 0.02  | 0.05  | 0.18 | 0.48     | 0.27     | 0.0028   | NA | NA | NA | NA |

|       |       |       |       |      |          |          |        |    |    |    |    |
|-------|-------|-------|-------|------|----------|----------|--------|----|----|----|----|
| -0.06 | -0.08 | 0     | -0.02 | 0.18 | 0.061    | 0.95     | 0.17   | NA | NA | NA | NA |
| 0.03  | 0.02  | -0.04 | 0     | 0.18 | 0.25     | 0.0016   | 1      | NA | NA | NA | NA |
| 0.1   | 0.02  | 0.04  | -0.02 | 0.18 | 0.72     | 0.18     | 0.48   | NA | NA | NA | NA |
| 0.04  | 0.11  | -0.06 | -0.03 | 0.18 | 0.00068  | 0.00011  | 0.08   | NA | NA | NA | NA |
| 0.12  | 0.09  | -0.08 | 0.04  | 0.18 | 0.28     | 0.00046  | 0.14   | NA | NA | NA | NA |
| 0.05  | 0.03  | 0.01  | 0.03  | 0.19 | 0.31     | 0.74     | 0.35   | NA | NA | NA | NA |
| 0.05  | 0.14  | -0.01 | 0.03  | 0.19 | 0.00041  | 0.66     | 0.26   | NA | NA | NA | NA |
| 0.18  | 0.07  | -0.04 | -0.05 | 0.19 | 0.05     | 0.081    | 0.012  | NA | NA | NA | NA |
| -0.1  | -0.11 | 0.05  | 0.03  | 0.19 | 0.008    | 0.058    | 0.22   | NA | NA | NA | NA |
| 0.12  | 0.11  | -0.05 | 0.02  | 0.19 | 0.24     | 0.1      | 0.55   | NA | NA | NA | NA |
| 0.08  | 0     | -0.01 | 0.01  | 0.19 | 1        | 0.72     | 0.79   | NA | NA | NA | NA |
| -0.05 | 0     | -0.03 | 0.02  | 0.19 | 1        | 0.29     | 0.43   | NA | NA | NA | NA |
| -0.09 | -0.05 | 0     | -0.01 | 0.2  | 0.54     | 0.96     | 0.68   | NA | NA | NA | NA |
| 0.06  | 0.02  | -0.04 | -0.02 | 0.2  | 0.53     | 0.02     | 0.36   | NA | NA | NA | NA |
| 0.03  | 0.08  | 0     | 0     | 0.2  | 2.70E-07 | 0.96     | 0.89   | NA | NA | NA | NA |
| -0.05 | 0.03  | -0.1  | -0.06 | 0.2  | 0.28     | 1.00E-06 | 0.0066 | NA | NA | NA | NA |
| 0.2   | -0.07 | -0.01 | 0     | 0.2  | 0.39     | 0.76     | 0.95   | NA | NA | NA | NA |
| 0.1   | 0.02  | -0.09 | -0.09 | 0.2  | 0.8      | 0.0072   | 0.011  | NA | NA | NA | NA |
| 0.13  | 0     | 0.03  | 0.02  | 0.21 | 1        | 0.63     | 0.8    | NA | NA | NA | NA |
| 0.07  | 0.11  | -0.03 | 0.06  | 0.21 | 0.0073   | 0.39     | 0.19   | NA | NA | NA | NA |
| 0.1   | 0.05  | 0.01  | 0.01  | 0.22 | 0.31     | 0.61     | 0.62   | NA | NA | NA | NA |
| 0.04  | 0.18  | -0.02 | -0.03 | 0.22 | 2.50E-07 | 0.42     | 0.13   | NA | NA | NA | NA |
| 0.19  | 0.08  | -0.08 | -0.03 | 0.22 | 0.61     | 0.00063  | 0.41   | NA | NA | NA | NA |
| 0.04  | -0.01 | -0.05 | -0.03 | 0.22 | 0.72     | 0.015    | 0.22   | NA | NA | NA | NA |
| 0.03  | 0     | -0.06 | -0.02 | 0.22 | 0.86     | 5.60E-06 | 0.31   | NA | NA | NA | NA |
| 0.07  | 0.07  | -0.03 | 0.02  | 0.22 | 0.17     | 0.058    | 0.46   | NA | NA | NA | NA |
| 0.12  | 0.1   | -0.07 | -0.01 | 0.23 | 0.14     | 0.0088   | 0.9    | NA | NA | NA | NA |
| -0.25 | -0.16 | -0.08 | -0.01 | 0.23 | 0.3      | 0.0063   | 0.72   | NA | NA | NA | NA |
| 0.05  | 0.1   | 0.03  | 0.02  | 0.23 | 0.01     | 0.15     | 0.46   | NA | NA | NA | NA |
| 0.05  | -0.03 | -0.03 | 0.06  | 0.24 | 0.47     | 0.15     | 0.0088 | NA | NA | NA | NA |

|       |       |       |       |      |          |          |          |    |    |    |    |
|-------|-------|-------|-------|------|----------|----------|----------|----|----|----|----|
| 0.02  | 0     | -0.05 | -0.02 | 0.24 | 0.87     | 4.70E-09 | 0.095    | NA | NA | NA | NA |
| 0.9   | 0.28  | 0.05  | 0.07  | 0.25 | 0.034    | 0.23     | 0.2      | NA | NA | NA | NA |
| 0.06  | 0     | -0.03 | 0.07  | 0.25 | 1        | 0.024    | 7.70E-07 | NA | NA | NA | NA |
| 0.03  | 0.06  | -0.05 | -0.01 | 0.25 | 0.00059  | 0.0012   | 0.46     | NA | NA | NA | NA |
| 0.04  | 0.11  | -0.07 | -0.03 | 0.25 | 6.60E-06 | 9.60E-05 | 0.17     | NA | NA | NA | NA |
| -0.26 | -0.1  | 0.02  | 0.22  | 0.25 | 0.85     | 0.98     | 0.011    | NA | NA | NA | NA |
| -0.03 | 0.04  | -0.02 | 0.02  | 0.25 | 0.056    | 0.2      | 0.083    | NA | NA | NA | NA |
| 0.06  | 0.06  | -0.04 | 0.02  | 0.25 | 0.12     | 0.051    | 0.34     | NA | NA | NA | NA |
| 0.13  | 0     | -0.06 | -0.04 | 0.26 | 1        | 0.0088   | 0.16     | NA | NA | NA | NA |
| 0.03  | 0     | -0.06 | -0.02 | 0.27 | 1        | 9.70E-05 | 0.44     | NA | NA | NA | NA |
| -0.2  | -0.2  | 0.03  | 0.22  | 0.27 | 0.31     | 0.37     | 3.20E-06 | NA | NA | NA | NA |
| 0.08  | 0.03  | -0.05 | -0.07 | 0.27 | 0.5      | 0.12     | 0.044    | NA | NA | NA | NA |
| -0.13 | -0.07 | -0.04 | -0.17 | 0.27 | 0.34     | 0.75     | 0.039    | NA | NA | NA | NA |
| 0.04  | 0.02  | -0.01 | 0.02  | 0.27 | 0.35     | 0.32     | 0.12     | NA | NA | NA | NA |
| -0.06 | 0.09  | -0.05 | -0.01 | 0.27 | 0.063    | 0.015    | 0.81     | NA | NA | NA | NA |
| 0.13  | 0.3   | -0.01 | 0.08  | 0.27 | 0.035    | 1        | 0.16     | NA | NA | NA | NA |
| 0.09  | 0.04  | -0.06 | 0.04  | 0.28 | 0.61     | 0.28     | 0.61     | NA | NA | NA | NA |
| -0.36 | 0.25  | -0.1  | 0.76  | 0.28 | 0.45     | 0.2      | 6.90E-06 | NA | NA | NA | NA |
| 0.11  | 0.16  | -0.13 | -0.16 | 0.28 | 0.012    | 0.0014   | 0.00023  | NA | NA | NA | NA |
| -0.07 | 0.7   | 0     | 0.05  | 0.28 | 2.40E-06 | 1        | 0.046    | NA | NA | NA | NA |
| -0.15 | 0.06  | -0.01 | -0.01 | 0.28 | 0.82     | 0.94     | 0.85     | NA | NA | NA | NA |
| -0.13 | -0.11 | -0.04 | -0.1  | 0.28 | 0.09     | 0.6      | 0.14     | NA | NA | NA | NA |
| 0.04  | 0.08  | -0.09 | -0.09 | 0.28 | 0.025    | 0.16     | 0.16     | NA | NA | NA | NA |
| 0.8   | 0.69  | -0.05 | -0.13 | 0.28 | 0.046    | 0.5      | 0.054    | NA | NA | NA | NA |
| -0.07 | 0.05  | 0     | 0.13  | 0.29 | 0.47     | 0.97     | 1.10E-06 | NA | NA | NA | NA |
| 0.04  | 0.02  | -0.03 | 0.02  | 0.29 | 0.6      | 0.03     | 0.36     | NA | NA | NA | NA |
| 0.04  | 0.05  | -0.04 | 0.03  | 0.29 | 0.14     | 0.091    | 0.25     | NA | NA | NA | NA |
| 0.15  | 0.22  | -0.12 | 0.14  | 0.3  | 0.1      | 0.045    | 0.24     | NA | NA | NA | NA |
| 0.03  | 0     | -0.01 | 0.05  | 0.31 | 1        | 0.59     | 0.00011  | NA | NA | NA | NA |
| -0.08 | 0.08  | -0.02 | 0.03  | 0.31 | 0.2      | 0.53     | 0.18     | NA | NA | NA | NA |

|       |       |       |       |      |          |          |         |    |    |    |    |
|-------|-------|-------|-------|------|----------|----------|---------|----|----|----|----|
| -0.02 | 0.03  | -0.03 | 0.04  | 0.31 | 0.077    | 0.082    | 0.033   | NA | NA | NA | NA |
| 0.06  | 0.08  | -0.04 | 0.05  | 0.32 | 0.15     | 0.42     | 0.13    | NA | NA | NA | NA |
| -0.1  | 0.07  | -0.03 | -0.01 | 0.32 | 0.63     | 0.47     | 0.91    | NA | NA | NA | NA |
| 0.23  | 0.11  | -0.01 | 0.06  | 0.32 | 0.58     | 0.7      | 0.069   | NA | NA | NA | NA |
| 0.09  | -0.02 | -0.07 | -0.05 | 0.33 | 0.89     | 0.00078  | 0.074   | NA | NA | NA | NA |
| 0.07  | -0.03 | -0.04 | -0.04 | 0.34 | 0.35     | 0.19     | 0.21    | NA | NA | NA | NA |
| 0.06  | 0.15  | -0.06 | -0.03 | 0.34 | 8.20E-06 | 7.90E-05 | 0.038   | NA | NA | NA | NA |
| 0.86  | 0.01  | -0.02 | -0.08 | 0.34 | 1        | 1        | 0.57    | NA | NA | NA | NA |
| -0.18 | -0.33 | 0.03  | 0.78  | 0.34 | 0.32     | 0.91     | 0.00024 | NA | NA | NA | NA |
| -0.3  | -0.34 | -0.11 | 0.07  | 0.34 | 2.40E-05 | 0.013    | 0.17    | NA | NA | NA | NA |
| -0.09 | 0.06  | -0.06 | 0     | 0.34 | 0.63     | 0.00066  | 0.94    | NA | NA | NA | NA |
| 0.06  | 0.03  | -0.05 | -0.04 | 0.34 | 0.53     | 0.027    | 0.2     | NA | NA | NA | NA |
| -0.18 | -0.29 | 0.09  | 0.09  | 0.35 | 0.0087   | 0.24     | 0.1     | NA | NA | NA | NA |
| -0.06 | 0.07  | -0.04 | 0.08  | 0.35 | 0.33     | 0.0056   | 0.00031 | NA | NA | NA | NA |
| -0.09 | 0.05  | -0.07 | 0     | 0.35 | 0.86     | 0.072    | 1       | NA | NA | NA | NA |
| 0.09  | 0.4   | -0.05 | 0.12  | 0.35 | 0.00012  | 0.12     | 0.00017 | NA | NA | NA | NA |
| 0.04  | 0.05  | -0.01 | 0.04  | 0.35 | 0.11     | 0.79     | 0.018   | NA | NA | NA | NA |
| 0.03  | 0.02  | 0.01  | 0.04  | 0.35 | 0.45     | 0.39     | 0.0088  | NA | NA | NA | NA |
| 0.09  | 0.06  | 0.01  | 0.13  | 0.36 | 0.48     | 0.76     | 0.0011  | NA | NA | NA | NA |
| 0.04  | 0.19  | 0     | 0.08  | 0.36 | 8.80E-06 | 0.98     | 0.0094  | NA | NA | NA | NA |
| 0.18  | 0.01  | -0.04 | 0.05  | 0.36 | 0.82     | 0.11     | 0.073   | NA | NA | NA | NA |
| 0.03  | -0.02 | 0.01  | 0.04  | 0.37 | 0.37     | 0.47     | 0.0076  | NA | NA | NA | NA |
| -0.44 | -0.33 | 0.01  | 0.08  | 0.37 | 1        | 0.86     | 0.16    | NA | NA | NA | NA |
| 0.11  | -0.07 | -0.02 | 0.02  | 0.37 | 0.27     | 0.62     | 0.64    | NA | NA | NA | NA |
| 0.17  | 0.07  | 0     | 0.11  | 0.37 | 0.84     | 1        | 0.0024  | NA | NA | NA | NA |
| -0.1  | -0.08 | -0.03 | -0.02 | 0.37 | 0.17     | 0.2      | 0.49    | NA | NA | NA | NA |
| 0.04  | 0.13  | 0.01  | 0.02  | 0.37 | 9.00E-07 | 0.8      | 0.37    | NA | NA | NA | NA |
| -0.04 | -0.04 | 0.01  | 0.01  | 0.37 | 0.19     | 0.75     | 0.82    | NA | NA | NA | NA |
| 0.12  | 0.04  | 0     | 0.03  | 0.38 | 0.61     | 1        | 0.086   | NA | NA | NA | NA |
| -0.02 | 0.04  | -0.04 | -0.04 | 0.38 | 0.072    | 0.03     | 0.02    | NA | NA | NA | NA |

|       |       |       |       |      |          |          |          |    |    |    |    |
|-------|-------|-------|-------|------|----------|----------|----------|----|----|----|----|
| -0.04 | 0.01  | -0.07 | -0.04 | 0.39 | 0.95     | 0.0032   | 0.13     | NA | NA | NA | NA |
| -0.03 | 0.24  | -0.04 | 0     | 0.39 | 2.10E-08 | 0.017    | 1        | NA | NA | NA | NA |
| 0.23  | 0.1   | -0.07 | -0.06 | 0.4  | 0.53     | 0.0091   | 0.059    | NA | NA | NA | NA |
| 0.24  | 0.16  | 0.1   | 0.09  | 0.4  | 0.6      | 0.019    | 0.075    | NA | NA | NA | NA |
| 0.05  | -0.07 | -0.04 | -0.02 | 0.4  | 0.069    | 0.067    | 0.32     | NA | NA | NA | NA |
| 0.05  | 0.04  | -0.05 | 0.01  | 0.4  | 0.44     | 0.005    | 0.71     | NA | NA | NA | NA |
| 0.02  | 0.06  | -0.01 | 0.03  | 0.4  | 0.00033  | 0.26     | 0.01     | NA | NA | NA | NA |
| 0.03  | 0.08  | -0.03 | 0.01  | 0.4  | 0.0032   | 0.084    | 0.54     | NA | NA | NA | NA |
| 0.12  | -0.01 | -0.03 | 0.1   | 0.4  | 1        | 0.18     | 8.50E-06 | NA | NA | NA | NA |
| 0.03  | 0.02  | -0.07 | -0.02 | 0.41 | 0.51     | 0.00015  | 0.37     | NA | NA | NA | NA |
| 0.87  | 0.01  | -0.05 | 0.03  | 0.41 | 1        | 0.19     | 0.79     | NA | NA | NA | NA |
| 0.03  | -0.03 | 0.08  | 0.11  | 0.42 | 0.54     | 0.0015   | 4.20E-06 | NA | NA | NA | NA |
| 0.05  | 0.12  | -0.01 | 0.05  | 0.42 | 0.027    | 0.6      | 0.079    | NA | NA | NA | NA |
| 0.04  | 0.13  | -0.01 | -0.04 | 0.42 | 0.011    | 0.9      | 0.24     | NA | NA | NA | NA |
| 0.1   | 0.06  | 0.05  | 0.08  | 0.42 | 0.91     | 0.17     | 0.13     | NA | NA | NA | NA |
| 0.04  | -0.02 | -0.02 | 0     | 0.42 | 0.54     | 0.18     | 0.98     | NA | NA | NA | NA |
| 0.05  | 0.06  | -0.09 | 0.11  | 0.43 | 0.64     | 0.026    | 0.052    | NA | NA | NA | NA |
| -0.04 | -0.07 | -0.05 | 0.01  | 0.43 | 0.13     | 5.00E-04 | 0.61     | NA | NA | NA | NA |
| 0.03  | 0.06  | -0.01 | 0     | 0.43 | 0.031    | 0.43     | 0.91     | NA | NA | NA | NA |
| -0.05 | 0.21  | 0.01  | 0.02  | 0.43 | 0.00015  | 0.92     | 0.5      | NA | NA | NA | NA |
| 0.02  | 0.2   | -0.04 | 0     | 0.43 | 1.30E-06 | 0.0067   | 0.99     | NA | NA | NA | NA |
| 0.05  | 0.01  | -0.04 | 0.02  | 0.44 | 0.78     | 0.058    | 0.44     | NA | NA | NA | NA |
| 0.06  | 0.02  | -0.06 | -0.01 | 0.44 | 0.74     | 0.0074   | 0.69     | NA | NA | NA | NA |
| 0.81  | 0.1   | -0.03 | -0.03 | 0.44 | 0.4      | 0.51     | 0.65     | NA | NA | NA | NA |
| 0.2   | 0.02  | -0.04 | -0.08 | 0.44 | 0.79     | 0.31     | 0.0042   | NA | NA | NA | NA |
| 0.03  | 0.04  | -0.05 | 0.03  | 0.44 | 0.21     | 6.00E-04 | 0.1      | NA | NA | NA | NA |
| -0.06 | 0     | -0.04 | 0.02  | 0.45 | 1        | 0.13     | 0.37     | NA | NA | NA | NA |
| 0.03  | 0.04  | -0.05 | -0.04 | 0.45 | 0.073    | 0.0024   | 0.015    | NA | NA | NA | NA |
| 0.01  | 0.03  | -0.09 | -0.05 | 0.46 | 0.18     | 6.70E-05 | 0.023    | NA | NA | NA | NA |
| 0.07  | -0.08 | -0.03 | 0.07  | 0.46 | 0.16     | 0.22     | 0.0032   | NA | NA | NA | NA |

|       |       |       |       |      |          |          |          |    |    |    |    |
|-------|-------|-------|-------|------|----------|----------|----------|----|----|----|----|
| 0.07  | 0.28  | 0     | 0.04  | 0.46 | 2.60E-06 | 0.98     | 0.043    | NA | NA | NA | NA |
| 0.07  | -0.01 | -0.08 | 0     | 0.47 | 0.89     | 2.60E-06 | 1        | NA | NA | NA | NA |
| 0.03  | 0.07  | -0.03 | -0.07 | 0.47 | 0.17     | 0.066    | 3.80E-05 | NA | NA | NA | NA |
| 0.07  | 0.06  | -0.07 | -0.16 | 0.47 | 0.53     | 0.15     | 0.0021   | NA | NA | NA | NA |
| -0.04 | -0.14 | -0.06 | -0.01 | 0.48 | 0.0021   | 0.07     | 0.74     | NA | NA | NA | NA |
| 0.06  | 0.07  | -0.1  | -0.03 | 0.48 | 0.31     | 3.10E-07 | 0.15     | NA | NA | NA | NA |
| 0.03  | 0.05  | -0.04 | -0.09 | 0.48 | 0.11     | 0.054    | 4.50E-06 | NA | NA | NA | NA |
| 0.08  | 0.11  | -0.05 | 0.06  | 0.49 | 0.04     | 0.034    | 0.048    | NA | NA | NA | NA |
| 0.06  | 0.17  | 0.05  | 0.15  | 0.49 | 3.00E-04 | 0.1      | 0.005    | NA | NA | NA | NA |
| -0.02 | 0.02  | -0.07 | -0.05 | 0.49 | 0.57     | 2.40E-05 | 0.0044   | NA | NA | NA | NA |
| 0.05  | -0.05 | -0.04 | 0     | 0.49 | 0.28     | 0.16     | 1        | NA | NA | NA | NA |
| -0.06 | 0.13  | -0.01 | 0.05  | 0.5  | 0.21     | 0.79     | 0.096    | NA | NA | NA | NA |
| 0.07  | -0.01 | -0.04 | 0.05  | 0.5  | 1        | 0.39     | 0.23     | NA | NA | NA | NA |
| 0.03  | -0.04 | -0.04 | 0     | 0.5  | 0.1      | 0.035    | 0.86     | NA | NA | NA | NA |
| 0.26  | NA    | -0.11 | 0.01  | 0.5  | NA       | 0.4      | 1        | NA | NA | NA | NA |
| 0.04  | 0.14  | -0.02 | 0.05  | 0.5  | 0.0036   | 0.47     | 0.11     | NA | NA | NA | NA |
| -0.1  | -0.08 | 0.05  | 0.04  | 0.5  | 0.39     | 0.33     | 0.32     | NA | NA | NA | NA |
| -0.02 | 0     | -0.03 | -0.02 | 0.5  | 1        | 0.12     | 0.54     | NA | NA | NA | NA |
| -0.06 | 0.19  | -0.04 | 0.05  | 0.5  | 0.0038   | 0.17     | 0.16     | NA | NA | NA | NA |
| -0.01 | -0.01 | -0.03 | 0.02  | 0.5  | 0.54     | 0.036    | 0.091    | NA | NA | NA | NA |
| 0.12  | 0.08  | -0.02 | 0     | 0.51 | 0.31     | 0.76     | 1        | NA | NA | NA | NA |
| 0.07  | 0.03  | -0.03 | 0.05  | 0.51 | 1        | 0.42     | 0.23     | NA | NA | NA | NA |
| 0.08  | -0.01 | -0.01 | 0.07  | 0.51 | 1        | 0.82     | 0.046    | NA | NA | NA | NA |
| 0.03  | -0.02 | -0.02 | 0.06  | 0.51 | 0.37     | 0.13     | 0.00022  | NA | NA | NA | NA |
| 0.05  | 0.05  | -0.02 | 0.06  | 0.51 | 0.057    | 0.21     | 5.60E-05 | NA | NA | NA | NA |
| -0.09 | -0.05 | -0.06 | -0.01 | 0.52 | 0.58     | 0.017    | 0.96     | NA | NA | NA | NA |
| 0.07  | -0.02 | -0.01 | 0.01  | 0.52 | 0.85     | 0.86     | 0.77     | NA | NA | NA | NA |
| -0.14 | -0.18 | -0.08 | -0.03 | 0.52 | 0.02     | 0.00057  | 0.23     | NA | NA | NA | NA |
| 0.4   | 0.44  | 0.02  | 0.08  | 0.52 | 2.30E-06 | 0.6      | 0.012    | NA | NA | NA | NA |
| 0.02  | -0.06 | -0.01 | 0.05  | 0.53 | 0.009    | 0.56     | 0.013    | NA | NA | NA | NA |

|       |       |       |       |      |         |          |          |    |    |    |    |
|-------|-------|-------|-------|------|---------|----------|----------|----|----|----|----|
| -0.09 | -0.03 | -0.08 | 0.04  | 0.53 | 0.82    | 0.0023   | 0.35     | NA | NA | NA | NA |
| 0.06  | 0.11  | -0.05 | -0.03 | 0.53 | 0.07    | 0.058    | 0.29     | NA | NA | NA | NA |
| 0.15  | -0.03 | 0     | 0.1   | 0.53 | 0.78    | 1        | 0.00013  | NA | NA | NA | NA |
| -0.26 | -0.18 | -0.14 | -0.08 | 0.54 | 0.71    | 0.0086   | 0.22     | NA | NA | NA | NA |
| 0.07  | -0.1  | -0.07 | 0.06  | 0.54 | 0.00046 | 0.00079  | 0.04     | NA | NA | NA | NA |
| 0.07  | 0.03  | 0.13  | 0.38  | 0.54 | 0.9     | 0.057    | 4.90E-09 | NA | NA | NA | NA |
| 0.03  | -0.02 | -0.03 | 0.01  | 0.54 | 0.5     | 0.025    | 0.76     | NA | NA | NA | NA |
| 0.08  | -0.04 | -0.03 | -0.01 | 0.54 | 0.39    | 0.11     | 0.88     | NA | NA | NA | NA |
| 0.02  | -0.04 | -0.01 | 0.06  | 0.54 | 0.14    | 0.67     | 0.0066   | NA | NA | NA | NA |
| 0.05  | 0.12  | -0.03 | 0.01  | 0.54 | 0.13    | 0.17     | 0.49     | NA | NA | NA | NA |
| 0.08  | -0.04 | 0     | 0.04  | 0.55 | 0.91    | 1        | 0.26     | NA | NA | NA | NA |
| -0.01 | 0.05  | -0.02 | 0.01  | 0.55 | 0.0015  | 0.078    | 0.28     | NA | NA | NA | NA |
| -0.08 | 0.07  | -0.03 | 0.01  | 0.55 | 0.68    | 0.25     | 0.92     | NA | NA | NA | NA |
| 0.02  | 0.05  | -0.02 | -0.04 | 0.55 | 0.12    | 0.36     | 0.0072   | NA | NA | NA | NA |
| 0.03  | 0.04  | -0.03 | -0.01 | 0.55 | 0.11    | 0.031    | 0.47     | NA | NA | NA | NA |
| 0.09  | -0.01 | -0.08 | -0.05 | 0.56 | 1       | 0.00022  | 0.022    | NA | NA | NA | NA |
| 0.04  | 0.01  | -0.03 | -0.04 | 0.56 | 0.9     | 0.19     | 0.078    | NA | NA | NA | NA |
| 0.02  | 0.05  | -0.01 | 0.02  | 0.56 | 0.031   | 0.74     | 0.17     | NA | NA | NA | NA |
| -0.07 | 0.01  | -0.01 | 0.04  | 0.56 | 1       | 0.73     | 0.16     | NA | NA | NA | NA |
| -0.05 | -0.05 | -0.09 | 0.07  | 0.57 | 0.28    | 0.032    | 0.15     | NA | NA | NA | NA |
| 0.03  | 0.05  | -0.04 | -0.07 | 0.57 | 0.073   | 0.46     | 0.11     | NA | NA | NA | NA |
| 0.03  | 0.02  | -0.05 | -0.03 | 0.57 | 0.47    | 0.00016  | 0.045    | NA | NA | NA | NA |
| 0.02  | 0.01  | -0.04 | 0     | 0.57 | 0.84    | 0.0087   | 0.93     | NA | NA | NA | NA |
| 0.22  | 0.67  | -0.05 | 0.75  | 0.57 | 0.8     | 1        | 0.26     | NA | NA | NA | NA |
| 0.1   | 0.09  | -0.09 | 0.08  | 0.57 | 0.65    | 0.0039   | 0.033    | NA | NA | NA | NA |
| -0.02 | -0.06 | -0.06 | -0.02 | 0.57 | 0.019   | 1.10E-05 | 0.27     | NA | NA | NA | NA |
| 0.04  | -0.03 | -0.03 | -0.01 | 0.57 | 0.38    | 0.24     | 0.63     | NA | NA | NA | NA |
| -0.14 | -0.13 | -0.17 | -0.12 | 0.58 | 0.63    | 3.60E-05 | 0.2      | NA | NA | NA | NA |
| 0.14  | NA    | 0.04  | -0.05 | 0.58 | NA      | 0.71     | 0.52     | NA | NA | NA | NA |
| -0.19 | -0.18 | -0.07 | 0.01  | 0.58 | 0.61    | 0.017    | 0.88     | NA | NA | NA | NA |



|       |       |       |       |      |          |          |          |    |    |    |    |
|-------|-------|-------|-------|------|----------|----------|----------|----|----|----|----|
| -0.67 | -0.82 | -0.12 | 0.03  | 0.58 | 0.068    | 6.00E-04 | 0.58     | NA | NA | NA | NA |
| 0.04  | 0.14  | 0.06  | 0.04  | 0.58 | 0.022    | 0.12     | 0.11     | NA | NA | NA | NA |
| -0.04 | 0     | -0.02 | -0.01 | 0.58 | 1        | 0.098    | 0.72     | NA | NA | NA | NA |
| -0.06 | 0     | -0.08 | 0.03  | 0.59 | 1        | 0.0027   | 0.53     | NA | NA | NA | NA |
| 0.25  | 0.06  | -0.02 | 0.18  | 0.59 | 0.35     | 0.61     | 7.40E-08 | NA | NA | NA | NA |
| 0.29  | -0.32 | -0.01 | 0.12  | 0.59 | 0.00022  | 0.68     | 0.0038   | NA | NA | NA | NA |
| 0.46  | 0.46  | NA    | NA    | 0.59 | 0.14     | NA       | NA       | NA | NA | NA | NA |
| 0.03  | 0.13  | -0.01 | -0.06 | 0.59 | 2.00E-04 | 0.69     | 0.00013  | NA | NA | NA | NA |
| 0.12  | 0.01  | -0.08 | -0.07 | 0.6  | 1        | 0.035    | 0.1      | NA | NA | NA | NA |
| 0.01  | 0.03  | -0.02 | 0     | 0.6  | 0.12     | 0.28     | 0.88     | NA | NA | NA | NA |
| 0.01  | -0.03 | -0.07 | -0.03 | 0.6  | 0.035    | 6.70E-07 | 0.026    | NA | NA | NA | NA |
| -0.05 | -0.07 | -0.06 | 0.02  | 0.61 | 0.62     | 0.11     | 0.73     | NA | NA | NA | NA |
| -0.02 | -0.04 | -0.07 | -0.02 | 0.61 | 0.31     | 0.00011  | 0.44     | NA | NA | NA | NA |
| -0.03 | 0     | -0.06 | -0.03 | 0.62 | 1        | 0.00017  | 0.14     | NA | NA | NA | NA |
| -0.19 | 0.22  | 0.03  | 0.21  | 0.62 | 0.44     | 0.42     | 7.80E-06 | NA | NA | NA | NA |
| 0.1   | 0     | 0.02  | -0.03 | 0.62 | 1        | 0.81     | 0.58     | NA | NA | NA | NA |
| 0.06  | 0.03  | -0.04 | 0     | 0.62 | 0.76     | 0.1      | 1        | NA | NA | NA | NA |
| -0.02 | -0.04 | -0.08 | -0.04 | 0.63 | 0.2      | 0.00011  | 0.029    | NA | NA | NA | NA |
| 0.01  | 0.08  | -0.07 | -0.03 | 0.63 | 0.00036  | 1.50E-05 | 0.11     | NA | NA | NA | NA |
| -0.02 | 0.01  | -0.04 | -0.01 | 0.63 | 0.81     | 0.039    | 0.67     | NA | NA | NA | NA |
| 0.14  | 0.83  | -0.33 | -0.26 | 0.64 | 0.0083   | 0.34     | 0.66     | NA | NA | NA | NA |
| 0.1   | -0.06 | -0.05 | 0.01  | 0.64 | 0.22     | 0.0093   | 0.79     | NA | NA | NA | NA |
| 0.12  | 0.91  | 0.11  | 0.17  | 0.64 | 0.058    | 0.034    | 0.00083  | NA | NA | NA | NA |
| 0.09  | 0.02  | -0.06 | 0.06  | 0.64 | 0.94     | 0.029    | 0.08     | NA | NA | NA | NA |
| 0.04  | 0.01  | -0.09 | 0     | 0.65 | 1        | 0.0021   | 1        | NA | NA | NA | NA |
| -0.04 | -0.13 | -0.02 | -0.09 | 0.65 | 0.05     | 0.82     | 0.1      | NA | NA | NA | NA |
| 0.09  | -0.13 | 0     | 0.12  | 0.65 | 0.16     | 1        | 0.0093   | NA | NA | NA | NA |
| -0.16 | -0.16 | -0.07 | 0.03  | 0.65 | 0.24     | 4.60E-05 | 0.47     | NA | NA | NA | NA |
| 0.74  | -0.16 | -0.04 | -0.06 | 0.65 | 0.14     | 0.52     | 0.11     | NA | NA | NA | NA |
| 0.11  | 0.14  | 0.01  | 0.07  | 0.65 | 0.37     | 0.91     | 0.072    | NA | NA | NA | NA |

|       |       |       |       |      |         |          |          |    |    |    |    |
|-------|-------|-------|-------|------|---------|----------|----------|----|----|----|----|
| 0.02  | -0.04 | -0.07 | 0     | 0.66 | 0.11    | 9.90E-07 | 0.92     | NA | NA | NA | NA |
| 0.02  | 0.02  | 0.01  | 0     | 0.67 | 0.65    | 0.98     | 1        | NA | NA | NA | NA |
| -0.02 | -0.07 | -0.06 | -0.02 | 0.67 | 0.076   | 0.00067  | 0.3      | NA | NA | NA | NA |
| 0.02  | 0.08  | -0.06 | 0.02  | 0.67 | 0.047   | 0.0011   | 0.47     | NA | NA | NA | NA |
| 0.02  | 0     | 0     | 0.01  | 0.67 | 1       | 0.92     | 0.69     | NA | NA | NA | NA |
| -0.02 | -0.03 | 0.02  | 0.08  | 0.68 | 0.82    | 0.53     | 0.0024   | NA | NA | NA | NA |
| 0.03  | 0.06  | -0.05 | -0.06 | 0.68 | 0.22    | 0.092    | 0.0081   | NA | NA | NA | NA |
| 0.18  | -0.14 | -0.08 | -0.02 | 0.68 | 0.77    | 0.14     | 0.83     | NA | NA | NA | NA |
| -0.04 | -0.04 | -0.13 | -0.06 | 0.68 | 0.48    | 1.80E-06 | 0.07     | NA | NA | NA | NA |
| 0.05  | -0.01 | -0.02 | 0.17  | 0.69 | 1       | 0.58     | 6.70E-06 | NA | NA | NA | NA |
| 0.25  | -0.21 | -0.15 | -0.07 | 0.69 | 0.6     | 0.00056  | 0.21     | NA | NA | NA | NA |
| 0.02  | 0.17  | 0     | 0.02  | 0.69 | 0.00049 | 0.99     | 0.58     | NA | NA | NA | NA |
| 0.03  | 0.08  | -0.05 | -0.01 | 0.69 | 0.038   | 0.0036   | 0.65     | NA | NA | NA | NA |
| -0.02 | 0.04  | -0.06 | 0.01  | 0.69 | 0.1     | 0.01     | 0.8      | NA | NA | NA | NA |
| 0.03  | 0.04  | -0.05 | 0     | 0.69 | 0.25    | 0.018    | 1        | NA | NA | NA | NA |
| 0.3   | 0.63  | 0.02  | 0.71  | 0.7  | 0.82    | 1        | 0.033    | NA | NA | NA | NA |
| 0.04  | 0.04  | -0.03 | 0.07  | 0.7  | 0.71    | 0.2      | 0.02     | NA | NA | NA | NA |
| -0.08 | -0.06 | -0.02 | 0.08  | 0.7  | 0.76    | 0.86     | 0.38     | NA | NA | NA | NA |
| 0.04  | 0.09  | -0.11 | -0.05 | 0.7  | 0.065   | 2.00E-05 | 0.12     | NA | NA | NA | NA |
| -0.03 | 0     | -0.05 | 0.05  | 0.71 | 1       | 0.029    | 0.031    | NA | NA | NA | NA |
| 0.13  | NA    | -0.04 | 0.09  | 0.71 | NA      | 0.67     | 0.9      | NA | NA | NA | NA |
| -0.06 | -0.02 | -0.03 | -0.01 | 0.71 | 0.93    | 0.35     | 0.82     | NA | NA | NA | NA |
| 0.02  | -0.01 | -0.02 | 0.03  | 0.71 | 0.65    | 0.29     | 0.14     | NA | NA | NA | NA |
| 0.18  | -0.02 | -0.12 | -0.04 | 0.72 | 1       | 0.055    | 0.62     | NA | NA | NA | NA |
| 0.12  | -0.03 | -0.02 | -0.01 | 0.72 | 0.6     | 0.49     | 0.71     | NA | NA | NA | NA |
| 0.01  | 0.03  | -0.03 | -0.05 | 0.73 | 0.15    | 0.063    | 0.00012  | NA | NA | NA | NA |
| 0.17  | -0.05 | -0.14 | 0.25  | 0.73 | 1       | 0.13     | 0.64     | NA | NA | NA | NA |
| 0.04  | 0.1   | -0.05 | -0.02 | 0.73 | 0.016   | 0.053    | 0.57     | NA | NA | NA | NA |
| 0.4   | -0.03 | -0.1  | -0.02 | 0.73 | 1       | 5.60E-06 | 0.44     | NA | NA | NA | NA |
| -0.01 | -0.02 | -0.02 | -0.01 | 0.73 | 0.41    | 0.059    | 0.26     | NA | NA | NA | NA |

|       |       |       |       |      |          |          |          |    |    |    |    |
|-------|-------|-------|-------|------|----------|----------|----------|----|----|----|----|
| 0.03  | 0.13  | -0.02 | 0.01  | 0.74 | 0.099    | 0.14     | 0.57     | NA | NA | NA | NA |
| 0.03  | 0.18  | 0.03  | 0.08  | 0.74 | 2.00E-04 | 0.28     | 0.003    | NA | NA | NA | NA |
| 0.04  | -0.01 | -0.01 | -0.03 | 0.74 | 1        | 0.92     | 0.37     | NA | NA | NA | NA |
| -0.01 | 0.05  | 0     | 0.03  | 0.74 | 0.091    | 0.94     | 0.057    | NA | NA | NA | NA |
| -0.03 | -0.03 | -0.04 | 0.02  | 0.75 | 0.74     | 0.21     | 0.61     | NA | NA | NA | NA |
| -0.04 | -0.05 | -0.07 | -0.06 | 0.75 | 0.5      | 0.00073  | 0.017    | NA | NA | NA | NA |
| -0.03 | 0     | -0.02 | 0     | 0.76 | 1        | 0.25     | 0.95     | NA | NA | NA | NA |
| 0.07  | -0.02 | -0.01 | -0.03 | 0.76 | 0.99     | 0.93     | 0.7      | NA | NA | NA | NA |
| 0.02  | -0.05 | -0.06 | -0.04 | 0.76 | 0.29     | 0.0034   | 0.057    | NA | NA | NA | NA |
| 0.13  | 0.19  | -0.01 | 0.05  | 0.76 | 0.72     | 1        | 0.24     | NA | NA | NA | NA |
| -0.02 | 0.1   | -0.06 | -0.04 | 0.77 | 0.011    | 0.00032  | 0.036    | NA | NA | NA | NA |
| 0.03  | 0.43  | -0.01 | 0.1   | 0.78 | 6.10E-06 | 0.8      | 0.0026   | NA | NA | NA | NA |
| -0.02 | 0.11  | -0.05 | 0.02  | 0.78 | 0.14     | 0.009    | 0.32     | NA | NA | NA | NA |
| -0.03 | 0.18  | -0.05 | 0.04  | 0.79 | 0.00028  | 0.049    | 0.3      | NA | NA | NA | NA |
| -0.02 | -0.01 | -0.03 | -0.03 | 0.79 | 0.91     | 0.068    | 0.063    | NA | NA | NA | NA |
| -0.03 | 0.06  | 0.04  | 0.08  | 0.8  | 0.37     | 0.088    | 0.00044  | NA | NA | NA | NA |
| -0.03 | 0.04  | -0.09 | -0.07 | 0.8  | 0.65     | 0.00072  | 0.017    | NA | NA | NA | NA |
| -0.01 | 0.27  | -0.09 | 0.12  | 0.81 | 4.40E-06 | 7.90E-07 | 0.00026  | NA | NA | NA | NA |
| 0.02  | -0.05 | -0.06 | -0.03 | 0.81 | 0.25     | 0.0017   | 0.17     | NA | NA | NA | NA |
| -0.01 | 0.04  | -0.03 | 0.05  | 0.81 | 0.28     | 0.031    | 0.0041   | NA | NA | NA | NA |
| 0.02  | 0.05  | 0     | 0.01  | 0.81 | 0.44     | 1        | 0.78     | NA | NA | NA | NA |
| 0.09  | -0.1  | -0.12 | -0.01 | 0.81 | 0.78     | 0.02     | 0.97     | NA | NA | NA | NA |
| 0.11  | 0.35  | -0.06 | 0.14  | 0.81 | 0.14     | 0.031    | 0.0024   | NA | NA | NA | NA |
| -0.01 | 0.03  | -0.01 | 0.07  | 0.81 | 0.27     | 0.32     | 1.60E-06 | NA | NA | NA | NA |
| 0.02  | 0.01  | -0.01 | 0.06  | 0.81 | 0.71     | 0.84     | 0.0067   | NA | NA | NA | NA |
| -0.04 | 0.29  | -0.05 | -0.06 | 0.81 | 0.46     | 0.33     | 0.34     | NA | NA | NA | NA |
| 0.04  | 0.1   | -0.04 | -0.08 | 0.82 | 0.25     | 0.15     | 0.00073  | NA | NA | NA | NA |
| 0.08  | 0.01  | -0.04 | 0.02  | 0.82 | 1        | 0.059    | 0.54     | NA | NA | NA | NA |
| 0.03  | -0.02 | -0.03 | -0.01 | 0.82 | 0.97     | 0.27     | 0.85     | NA | NA | NA | NA |
| -0.75 | NA    | -0.03 | 0.57  | 0.82 | NA       | 1        | 0.42     | NA | NA | NA | NA |

|       |       |       |       |      |        |         |        |    |    |    |    |
|-------|-------|-------|-------|------|--------|---------|--------|----|----|----|----|
| -0.06 | 0.07  | 0     | 0.08  | 0.82 | 1      | 0.98    | 0.037  | NA | NA | NA | NA |
| 0.67  | 0.23  | -0.06 | 0.23  | 0.83 | 0.4    | 0.23    | 0.037  | NA | NA | NA | NA |
| 0.02  | -0.05 | -0.07 | -0.01 | 0.83 | 0.59   | 0.016   | 0.78   | NA | NA | NA | NA |
| -0.05 | 0.2   | -0.06 | -0.02 | 0.83 | 0.043  | 0.07    | 0.74   | NA | NA | NA | NA |
| 0.02  | 0     | -0.05 | 0.01  | 0.83 | 1      | 0.011   | 0.77   | NA | NA | NA | NA |
| 0.01  | 0.09  | 0     | 0.03  | 0.83 | 0.022  | 1       | 0.43   | NA | NA | NA | NA |
| 0.03  | 0.06  | -0.06 | -0.03 | 0.84 | 0.24   | 0.015   | 0.18   | NA | NA | NA | NA |
| 0.03  | 0.02  | -0.01 | 0.01  | 0.84 | 0.8    | 0.87    | 0.77   | NA | NA | NA | NA |
| 0.13  | -0.12 | 0.01  | 0.01  | 0.85 | 0.077  | 0.92    | 0.79   | NA | NA | NA | NA |
| -0.01 | 0.01  | -0.04 | 0.02  | 0.85 | 0.88   | 0.00055 | 0.2    | NA | NA | NA | NA |
| 0.01  | 0.07  | -0.03 | 0.02  | 0.86 | 0.036  | 0.11    | 0.32   | NA | NA | NA | NA |
| -0.02 | -0.09 | 0     | 0.01  | 0.86 | 0.0082 | 1       | 0.8    | NA | NA | NA | NA |
| 0.01  | 0.02  | -0.03 | 0.03  | 0.86 | 0.51   | 0.047   | 0.067  | NA | NA | NA | NA |
| 0.02  | -0.13 | -0.01 | 0     | 0.86 | 0.01   | 0.86    | 0.95   | NA | NA | NA | NA |
| 0.02  | 0.07  | 0.02  | 0.05  | 0.87 | 0.009  | 0.57    | 0.038  | NA | NA | NA | NA |
| 0.06  | 0.24  | 0.16  | 0.3   | 0.87 | 0.0085 | 0.064   | 0.0014 | NA | NA | NA | NA |
| -0.03 | -0.07 | -0.03 | 0.01  | 0.87 | 0.44   | 0.54    | 0.84   | NA | NA | NA | NA |
| 0.03  | 0.07  | 0.08  | 0.1   | 0.87 | 0.42   | 0.09    | 0.038  | NA | NA | NA | NA |
| 0.06  | -0.2  | 0.03  | 0.08  | 0.87 | 0.051  | 0.59    | 0.027  | NA | NA | NA | NA |
| -0.21 | 0.17  | -0.22 | NA    | 0.87 | 1      | 0.00047 | NA     | NA | NA | NA | NA |
| 0.02  | NA    | -0.09 | -0.05 | 0.88 | NA     | 0.26    | 0.64   | NA | NA | NA | NA |
| -0.01 | -0.02 | 0.04  | 0.05  | 0.88 | 0.91   | 0.18    | 0.1    | NA | NA | NA | NA |
| -0.01 | 0.03  | -0.06 | -0.02 | 0.88 | 0.39   | 0.0042  | 0.39   | NA | NA | NA | NA |
| -0.01 | -0.05 | -0.03 | 0.05  | 0.88 | 0.11   | 0.02    | 0.0036 | NA | NA | NA | NA |
| -0.01 | -0.05 | -0.05 | -0.01 | 0.88 | 0.016  | 0.0014  | 0.73   | NA | NA | NA | NA |
| -0.03 | -0.03 | 0.02  | 0.05  | 0.88 | 0.75   | 0.74    | 0.34   | NA | NA | NA | NA |
| -0.02 | -0.01 | -0.11 | -0.06 | 0.88 | 1      | 0.001   | 0.43   | NA | NA | NA | NA |
| 0.02  | 0     | -0.07 | -0.01 | 0.89 | 1      | 0.00036 | 0.83   | NA | NA | NA | NA |
| -0.04 | -0.09 | -0.07 | 0     | 0.89 | 0.46   | 0.11    | 1      | NA | NA | NA | NA |
| 0.02  | -0.06 | -0.08 | -0.04 | 0.89 | 0.34   | 0.00049 | 0.13   | NA | NA | NA | NA |

|       |       |       |       |      |         |          |          |    |    |    |    |
|-------|-------|-------|-------|------|---------|----------|----------|----|----|----|----|
| 0.01  | 0.04  | -0.07 | -0.05 | 0.89 | 0.14    | 2.40E-05 | 0.00033  | NA | NA | NA | NA |
| 0.01  | -0.01 | -0.19 | -0.15 | 0.89 | 0.72    | 4.80E-08 | 0.00037  | NA | NA | NA | NA |
| 0.15  | -0.04 | -0.04 | -0.04 | 0.89 | 0.91    | 0.15     | 0.14     | NA | NA | NA | NA |
| -0.03 | 0     | -0.05 | 0     | 0.9  | 1       | 0.028    | 0.97     | NA | NA | NA | NA |
| -0.03 | -0.03 | -0.02 | 0.08  | 0.9  | 0.99    | 0.67     | 0.045    | NA | NA | NA | NA |
| 0.01  | 0.02  | -0.05 | -0.03 | 0.9  | 0.4     | 0.047    | 0.34     | NA | NA | NA | NA |
| -0.06 | -0.06 | -0.06 | -0.01 | 0.9  | 0.59    | 0.16     | 0.94     | NA | NA | NA | NA |
| 0.04  | 0.02  | -0.08 | 0.04  | 0.9  | 0.77    | 0.014    | 0.26     | NA | NA | NA | NA |
| 0.02  | -0.12 | -0.08 | 0.03  | 0.9  | 0.2     | 0.0059   | 0.45     | NA | NA | NA | NA |
| 0.01  | 0.1   | -0.03 | 0.01  | 0.9  | 0.00021 | 0.0049   | 0.47     | NA | NA | NA | NA |
| -0.18 | -0.09 | -0.19 | 0.01  | 0.91 | 1       | 0.0011   | 1        | NA | NA | NA | NA |
| 0.01  | 0.04  | 0.01  | 0.05  | 0.91 | 0.043   | 0.75     | 0.00043  | NA | NA | NA | NA |
| -0.06 | NA    | 0.05  | -0.01 | 0.91 | NA      | 0.4      | 0.99     | NA | NA | NA | NA |
| 0.02  | 0     | 0.04  | 0.02  | 0.91 | 1       | 0.21     | 0.7      | NA | NA | NA | NA |
| 0.05  | 0.08  | -0.11 | -0.05 | 0.91 | 1       | 0.00068  | 0.33     | NA | NA | NA | NA |
| 0.02  | 0.07  | -0.06 | 0.07  | 0.92 | 0.11    | 0.0097   | 0.025    | NA | NA | NA | NA |
| -0.01 | 0.09  | -0.08 | 0     | 0.92 | 0.082   | 1.30E-05 | 0.94     | NA | NA | NA | NA |
| 0.01  | -0.05 | 0     | 0.06  | 0.92 | 0.19    | 1        | 0.028    | NA | NA | NA | NA |
| 0.01  | 0.11  | -0.02 | 0.01  | 0.92 | 0.0021  | 0.4      | 0.81     | NA | NA | NA | NA |
| 0.04  | -0.05 | -0.08 | -0.02 | 0.92 | 0.35    | 0.00072  | 0.55     | NA | NA | NA | NA |
| -0.01 | 0.01  | -0.01 | 0.15  | 0.92 | 0.79    | 0.59     | 5.40E-09 | NA | NA | NA | NA |
| -0.06 | 0.19  | -0.12 | -0.12 | 0.92 | 0.44    | 0.0067   | 0.0025   | NA | NA | NA | NA |
| 0.1   | 0.04  | -0.03 | 0.02  | 0.92 | 1       | 0.48     | 0.91     | NA | NA | NA | NA |
| -0.04 | -0.01 | -0.14 | -0.01 | 0.93 | 1       | 0.0027   | 1        | NA | NA | NA | NA |
| 0.07  | 0.12  | -0.2  | 0.08  | 0.93 | 0.45    | 7.50E-06 | 0.51     | NA | NA | NA | NA |
| -0.01 | 0     | -0.02 | 0.02  | 0.93 | 1       | 0.19     | 0.14     | NA | NA | NA | NA |
| -0.04 | -0.02 | 0.02  | 0.08  | 0.93 | 0.93    | 0.56     | 0.011    | NA | NA | NA | NA |
| 0.02  | -0.01 | 0.02  | 0.08  | 0.94 | 1       | 0.78     | 0.044    | NA | NA | NA | NA |
| -0.01 | 0.01  | -0.02 | 0.03  | 0.94 | 0.66    | 0.36     | 0.11     | NA | NA | NA | NA |
| -0.58 | -0.55 | 0.04  | 0.23  | 0.94 | 0.96    | 0.18     | 2.10E-06 | NA | NA | NA | NA |

|       |       |       |       |      |         |          |        |    |    |    |    |
|-------|-------|-------|-------|------|---------|----------|--------|----|----|----|----|
| 0.01  | 0.06  | -0.01 | 0.04  | 0.94 | 0.1     | 0.44     | 0.045  | NA | NA | NA | NA |
| 0.02  | -0.01 | 0.05  | -0.01 | 0.94 | 1       | 0.18     | 0.79   | NA | NA | NA | NA |
| 0     | 0.01  | -0.04 | -0.02 | 0.94 | 0.65    | 1.00E-04 | 0.096  | NA | NA | NA | NA |
| 0.05  | -0.02 | -0.06 | -0.06 | 0.95 | 0.99    | 0.029    | 0.041  | NA | NA | NA | NA |
| 0.04  | -0.04 | -0.08 | -0.01 | 0.95 | 0.72    | 0.0026   | 0.91   | NA | NA | NA | NA |
| 0.03  | 0.01  | -0.05 | 0.01  | 0.95 | 1       | 0.064    | 0.84   | NA | NA | NA | NA |
| 0.01  | 0.03  | 0     | 0.01  | 0.95 | 0.6     | 0.92     | 0.68   | NA | NA | NA | NA |
| -0.12 | 0.07  | -0.05 | -0.07 | 0.95 | 0.93    | 0.36     | 0.27   | NA | NA | NA | NA |
| -0.06 | 0.19  | 0.04  | 0.03  | 0.95 | 0.52    | 0.33     | 0.27   | NA | NA | NA | NA |
| 0.02  | -0.16 | 0     | -0.02 | 0.95 | 0.011   | 1        | 0.35   | NA | NA | NA | NA |
| 0.01  | 0.11  | -0.04 | -0.06 | 0.95 | 0.00026 | 0.094    | 0.0025 | NA | NA | NA | NA |
| 0.01  | 0.04  | -0.06 | -0.02 | 0.95 | 0.55    | 0.0037   | 0.41   | NA | NA | NA | NA |
| 0.01  | 0     | -0.04 | 0.01  | 0.95 | 1       | 0.1      | 0.93   | NA | NA | NA | NA |
| 0.03  | -0.02 | 0.02  | -0.02 | 0.95 | 1       | 0.46     | 0.48   | NA | NA | NA | NA |
| 0     | -0.01 | -0.06 | 0     | 0.96 | 0.75    | 3.20E-06 | 0.92   | NA | NA | NA | NA |
| 0     | 0.03  | -0.06 | 0.02  | 0.96 | 0.22    | 0.00056  | 0.3    | NA | NA | NA | NA |
| 0.04  | -0.09 | -0.05 | 0.05  | 0.96 | 0.15    | 0.0044   | 0.031  | NA | NA | NA | NA |
| 0.05  | NA    | -0.06 | 0.03  | 0.96 | NA      | 0.19     | 0.53   | NA | NA | NA | NA |
| 0.02  | 0.01  | 0     | 0.04  | 0.96 | 0.94    | 1        | 0.12   | NA | NA | NA | NA |
| 0.01  | 0.03  | 0     | 0.07  | 0.97 | 0.13    | 1        | 0.0018 | NA | NA | NA | NA |
| 0.1   | 0.03  | 0.01  | 0.06  | 0.97 | 0.76    | 0.9      | 0.27   | NA | NA | NA | NA |
| 0.11  | 0.09  | -0.07 | 0.05  | 0.97 | 0.23    | 0.03     | 0.33   | NA | NA | NA | NA |
| 0.01  | 0.1   | -0.04 | -0.02 | 0.97 | 0.018   | 0.18     | 0.44   | NA | NA | NA | NA |
| 0.03  | -0.16 | 0.03  | 0.14  | 0.98 | 0.0079  | 0.53     | 0.0073 | NA | NA | NA | NA |
| -0.06 | 0.11  | 0.02  | -0.04 | 0.98 | 0.59    | 0.55     | 0.66   | NA | NA | NA | NA |
| 0.01  | 0     | -0.04 | -0.01 | 0.98 | 1       | 0.021    | 0.76   | NA | NA | NA | NA |
| 0.02  | 0     | -0.09 | -0.05 | 0.98 | 1       | 3.50E-05 | 0.069  | NA | NA | NA | NA |
| 0     | 0.04  | 0.01  | 0.03  | 0.98 | 0.0025  | 0.7      | 0.038  | NA | NA | NA | NA |
| -0.01 | 0.11  | -0.01 | 0     | 0.98 | 0.0059  | 0.89     | 1      | NA | NA | NA | NA |
| 0.02  | -0.06 | -0.03 | -0.01 | 0.99 | 0.079   | 0.14     | 0.9    | NA | NA | NA | NA |

|       |       |       |       |      |          |          |          |    |    |    |    |
|-------|-------|-------|-------|------|----------|----------|----------|----|----|----|----|
| 0.01  | -0.06 | 0     | 0.02  | 0.99 | 0.35     | 0.98     | 0.69     | NA | NA | NA | NA |
| -0.01 | -0.04 | -0.05 | 0.05  | 0.99 | 0.44     | 0.017    | 0.047    | NA | NA | NA | NA |
| 0.02  | 0.03  | -0.15 | -0.04 | 0.99 | 0.77     | 3.00E-07 | 0.22     | NA | NA | NA | NA |
| 0.03  | 0.09  | -0.03 | 0.1   | 1    | 0.77     | 0.75     | 0.053    | NA | NA | NA | NA |
| -0.01 | -0.03 | -0.06 | 0.01  | 1    | 0.71     | 0.29     | 1        | NA | NA | NA | NA |
| 0     | -0.01 | -0.09 | -0.06 | 1    | 0.66     | 7.80E-07 | 0.0013   | NA | NA | NA | NA |
| 0.01  | 0     | -0.03 | 0.01  | 1    | 1        | 0.077    | 0.64     | NA | NA | NA | NA |
| -0.01 | -0.28 | -0.12 | 0.03  | 1    | 0.013    | 0.00027  | 0.47     | NA | NA | NA | NA |
| -0.06 | -0.09 | -0.21 | -0.06 | 1    | 0.56     | 0.00044  | 0.9      | NA | NA | NA | NA |
| -0.03 | -0.04 | 0.01  | 0.05  | 1    | 0.87     | 1        | 0.55     | NA | NA | NA | NA |
| 0     | 0.08  | -0.05 | -0.04 | 1    | 7.30E-05 | 0.0017   | 0.007    | NA | NA | NA | NA |
| -0.01 | 0.2   | -0.08 | -0.01 | 1    | 0.041    | 0.0037   | 0.73     | NA | NA | NA | NA |
| -0.01 | 0.05  | 0     | 0     | 1    | 0.49     | 0.91     | 1        | NA | NA | NA | NA |
| 0     | 0.67  | -0.04 | -0.13 | 1    | 1        | 1        | 0.48     | NA | NA | NA | NA |
| -0.01 | -0.01 | -0.07 | 0     | 1    | 0.7      | 0.0054   | 0.97     | NA | NA | NA | NA |
| -0.06 | -0.12 | -0.06 | -0.05 | 1    | 0.49     | 0.056    | 0.28     | NA | NA | NA | NA |
| -0.01 | 0.15  | -0.09 | 0.02  | 1    | 0.044    | 0.054    | 0.88     | NA | NA | NA | NA |
| -0.01 | NA    | 0.05  | 0.05  | 1    | NA       | 0.45     | 0.27     | NA | NA | NA | NA |
| 0.02  | 0.01  | -0.1  | 0.06  | 1    | 1        | 0.012    | 0.32     | NA | NA | NA | NA |
| 0     | 0.08  | 0.03  | 0     | 1    | 0.16     | 0.29     | 0.96     | NA | NA | NA | NA |
| -0.67 | NA    | NA    | NA    | 1    | NA       | NA       | NA       | NA | NA | NA | NA |
| 0.01  | 0.01  | -0.06 | -0.01 | 1    | 1        | 0.0048   | 0.77     | NA | NA | NA | NA |
| -0.02 | 0.06  | -0.04 | 0     | 1    | 0.39     | 0.32     | 1        | NA | NA | NA | NA |
| 0.01  | 0.04  | 0     | 0.11  | 1    | 0.58     | 0.97     | 0.002    | NA | NA | NA | NA |
| 0     | 0.04  | 0.01  | 0.13  | 1    | 0.68     | 0.82     | 8.40E-07 | NA | NA | NA | NA |
| 0     | 0.33  | -0.02 | 0.17  | 1    | 0.0032   | 0.79     | 0.041    | NA | NA | NA | NA |
| -0.03 | 0.23  | -0.09 | 0.33  | 1    | 0.3      | 0.026    | 1.50E-06 | NA | NA | NA | NA |
| -0.01 | 0     | -0.04 | 0.01  | 1    | 1        | 0.013    | 0.48     | NA | NA | NA | NA |
| 0.19  | -0.14 | 0.04  | 0.05  | 1    | 0.22     | 0.53     | 0.36     | NA | NA | NA | NA |
| -0.12 | 0.02  | -0.1  | 0.04  | 1    | 1        | 0.29     | 0.9      | NA | NA | NA | NA |

|       |       |       |       |   |        |        |          |    |    |    |    |
|-------|-------|-------|-------|---|--------|--------|----------|----|----|----|----|
| 0.01  | 0.05  | 0     | 0.03  | 1 | 0.21   | 1      | 0.24     | NA | NA | NA | NA |
| -0.02 | -0.09 | 0     | 0.27  | 1 | 0.73   | 1      | 0.00022  | NA | NA | NA | NA |
| 0     | 0     | NA    | NA    | 1 | 1      | NA     | NA       | NA | NA | NA | NA |
| 0     | 0.12  | -0.02 | 0.03  | 1 | 0.0021 | 0.25   | 0.098    | NA | NA | NA | NA |
| 0.01  | -0.06 | -0.06 | 0.03  | 1 | 0.44   | 0.013  | 0.29     | NA | NA | NA | NA |
| -0.02 | 0.03  | 0.01  | 0.02  | 1 | 0.84   | 0.87   | 0.76     | NA | NA | NA | NA |
| -0.02 | -0.09 | -0.02 | 0.01  | 1 | 0.85   | 0.8    | 1        | NA | NA | NA | NA |
| 0.02  | -0.03 | 0.02  | 0.02  | 1 | 0.87   | 0.53   | 0.46     | NA | NA | NA | NA |
| 0.01  | 0.09  | -0.04 | -0.07 | 1 | 0.43   | 0.42   | 0.39     | NA | NA | NA | NA |
| -0.02 | -0.04 | -0.04 | 0.05  | 1 | 1      | 0.12   | 0.12     | NA | NA | NA | NA |
| 0     | 0.07  | -0.04 | 0.01  | 1 | 0.041  | 0.17   | 0.62     | NA | NA | NA | NA |
| 0     | -0.01 | 0.01  | 0.15  | 1 | 0.82   | 0.83   | 3.20E-06 | NA | NA | NA | NA |
| 0.01  | -0.04 | -0.06 | -0.08 | 1 | 1      | 0.43   | 0.23     | NA | NA | NA | NA |
| -0.01 | 0.13  | 0     | 0.13  | 1 | 0.056  | 1      | 0.00021  | NA | NA | NA | NA |
| 0     | NA    | 0.2   | NA    | 1 | NA     | 0.68   | NA       | NA | NA | NA | NA |
| -0.1  | 0.07  | -0.1  | -0.02 | 1 | 1      | 0.07   | 0.75     | NA | NA | NA | NA |
| 0     | -0.04 | -0.07 | 0.06  | 1 | 1      | 0.1    | 0.35     | NA | NA | NA | NA |
| 0     | 0.16  | -0.03 | 0.06  | 1 | 0.24   | 0.48   | 0.1      | NA | NA | NA | NA |
| 0.01  | -0.05 | -0.02 | 0.01  | 1 | 0.46   | 0.41   | 0.79     | NA | NA | NA | NA |
| 0.12  | 0.04  | -0.09 | -0.06 | 1 | 1      | 0.0037 | 0.13     | NA | NA | NA | NA |
| 0.1   | 0.1   | 0.05  | NA    | 1 | 0.98   | 0.77   | NA       | NA | NA | NA | NA |
| -0.04 | -0.32 | -0.06 | -0.03 | 1 | 0.0021 | 0.052  | 0.41     | NA | NA | NA | NA |
| 0.17  | NA    | NA    | NA    | 1 | NA     | NA     | NA       | NA | NA | NA | NA |
| -0.02 | 0.25  | 0.03  | 0.1   | 1 | 0.033  | 0.66   | 0.032    | NA | NA | NA | NA |
| -0.17 | 0.33  | -0.09 | -0.06 | 1 | 1      | 0.18   | 0.49     | NA | NA | NA | NA |
| 0.01  | -0.02 | 0     | -0.01 | 1 | 0.83   | 0.89   | 0.88     | NA | NA | NA | NA |
| 0.01  | -0.04 | -0.04 | 0.03  | 1 | 0.53   | 0.047  | 0.35     | NA | NA | NA | NA |
| 0.01  | 0.02  | -0.03 | 0.06  | 1 | 0.76   | 0.35   | 0.058    | NA | NA | NA | NA |
| 0.01  | 0.05  | -0.06 | 0.11  | 1 | 0.59   | 0.19   | 0.1      | NA | NA | NA | NA |
| 0     | -0.04 | -0.02 | 0.01  | 1 | 0.18   | 0.39   | 0.72     | NA | NA | NA | NA |



|       |       |       |       |   |         |          |          |    |    |    |    |
|-------|-------|-------|-------|---|---------|----------|----------|----|----|----|----|
| -0.03 | -0.06 | -0.03 | -0.04 | 1 | 1       | 0.4      | 0.44     | NA | NA | NA | NA |
| 0     | -0.01 | -0.01 | 0.01  | 1 | 0.87    | 0.44     | 0.61     | NA | NA | NA | NA |
| 0     | -0.1  | 0.06  | 0.11  | 1 | 0.78    | 0.49     | 0.12     | NA | NA | NA | NA |
| -0.01 | 0.03  | -0.01 | -0.01 | 1 | 0.64    | 0.76     | 0.76     | NA | NA | NA | NA |
| 0.01  | -0.01 | -0.03 | -0.02 | 1 | 1       | 0.24     | 0.59     | NA | NA | NA | NA |
| -0.01 | -0.14 | -0.01 | -0.01 | 1 | 0.00028 | 0.73     | 0.84     | NA | NA | NA | NA |
| 0.02  | -0.01 | NA    | NA    | 1 | 1       | NA       | NA       | NA | NA | NA | NA |
| 0.17  | NA    | -0.07 | -0.07 | 1 | NA      | 0.15     | 0.19     | NA | NA | NA | NA |
| 0     | -0.01 | -0.03 | 0.05  | 1 | 0.76    | 0.22     | 0.014    | NA | NA | NA | NA |
| 0.02  | -0.13 | -0.12 | -0.41 | 1 | 0.088   | 0.0087   | 2.60E-09 | NA | NA | NA | NA |
| -0.04 | -0.1  | -0.03 | -0.01 | 1 | 0.28    | 0.3      | 0.82     | NA | NA | NA | NA |
| -0.01 | 0.09  | -0.05 | -0.14 | 1 | 0.61    | 0.27     | 0.0035   | NA | NA | NA | NA |
| 0.04  | 0.06  | -0.01 | -0.03 | 1 | 0.4     | 0.74     | 0.27     | NA | NA | NA | NA |
| 0.02  | -0.09 | -0.1  | 0.05  | 1 | 0.58    | 0.0097   | 0.46     | NA | NA | NA | NA |
| -0.08 | 0.72  | -0.05 | 0.28  | 1 | 0.15    | 0.22     | 0.00017  | NA | NA | NA | NA |
| 0     | -0.01 | -0.05 | 0.05  | 1 | 1       | 0.13     | 0.088    | NA | NA | NA | NA |
| -0.03 | 0.11  | 0     | 0.07  | 1 | 0.11    | 1        | 0.037    | NA | NA | NA | NA |
| 0.01  | 0.14  | -0.02 | 0.22  | 1 | 0.62    | 0.83     | 0.00044  | NA | NA | NA | NA |
| 0.01  | 0.23  | -0.12 | -0.07 | 1 | 0.17    | 0.019    | 0.19     | NA | NA | NA | NA |
| -0.04 | -0.09 | -0.05 | -0.02 | 1 | 0.21    | 0.047    | 0.38     | NA | NA | NA | NA |
| 0.03  | -0.05 | -0.03 | 0.04  | 1 | 0.77    | 0.26     | 0.2      | NA | NA | NA | NA |
| 0     | -0.01 | -0.03 | 0.01  | 1 | 0.82    | 0.17     | 0.75     | NA | NA | NA | NA |
| 0.01  | 0.06  | -0.12 | 0.11  | 1 | 0.85    | 0.032    | 0.2      | NA | NA | NA | NA |
| 0.04  | NA    | -0.05 | 0.11  | 1 | NA      | 0.69     | 1        | NA | NA | NA | NA |
| 0.01  | 0.03  | -0.02 | 0.06  | 1 | 0.76    | 0.39     | 0.0095   | NA | NA | NA | NA |
| 0     | 0.01  | -0.03 | 0.03  | 1 | 0.7     | 0.17     | 0.1      | NA | NA | NA | NA |
| -0.01 | -0.01 | -0.16 | -0.08 | 1 | 0.91    | 0.00011  | 0.15     | NA | NA | NA | NA |
| 0     | -0.03 | -0.06 | -0.07 | 1 | 0.26    | 1.50E-05 | 2.20E-06 | NA | NA | NA | NA |
| 0.07  | 0.15  | -0.04 | -0.07 | 1 | 0.011   | 0.21     | 0.018    | NA | NA | NA | NA |
| 0.01  | 0.03  | 0     | 0.09  | 1 | 0.73    | 1        | 3.30E-05 | NA | NA | NA | NA |

|       |       |       |       |   |          |          |         |    |    |    |    |
|-------|-------|-------|-------|---|----------|----------|---------|----|----|----|----|
| -0.01 | -0.01 | -0.05 | -0.07 | 1 | 1        | 0.2      | 0.047   | NA | NA | NA | NA |
| 0.01  | -0.01 | -0.06 | 0.08  | 1 | 0.98     | 0.00015  | 0.00039 | NA | NA | NA | NA |
| -0.01 | -0.07 | -0.07 | 0.08  | 1 | 0.78     | 0.0074   | 0.092   | NA | NA | NA | NA |
| -0.08 | 0.21  | 0.01  | 0.05  | 1 | 0.65     | 0.87     | 0.11    | NA | NA | NA | NA |
| 0     | -0.05 | -0.17 | NA    | 1 | 0.93     | 0.017    | NA      | NA | NA | NA | NA |
| 0.07  | -0.04 | -0.02 | 0.16  | 1 | 1        | 0.67     | 0.00045 | NA | NA | NA | NA |
| 0     | -0.01 | -0.06 | -0.02 | 1 | 0.6      | 4.30E-08 | 0.22    | NA | NA | NA | NA |
| -0.02 | -0.06 | 0.01  | -0.03 | 1 | 0.21     | 0.81     | 0.38    | NA | NA | NA | NA |
| -0.03 | 0.11  | -0.01 | 0.17  | 1 | 0.52     | 0.94     | 0.0072  | NA | NA | NA | NA |
| 0     | -0.41 | 0.01  | 0     | 1 | 0.0062   | 0.78     | 0.98    | NA | NA | NA | NA |
| 0     | 0.2   | 0.01  | 0.61  | 1 | 1        | 1        | 0.03    | NA | NA | NA | NA |
| 0.03  | 0.15  | 0.09  | -0.06 | 1 | 0.39     | 0.031    | 0.059   | NA | NA | NA | NA |
| 0.04  | 0.01  | -0.03 | 0.05  | 1 | 0.88     | 0.15     | 0.046   | NA | NA | NA | NA |
| 0.01  | -0.17 | -0.02 | 0.01  | 1 | 0.00015  | 0.53     | 0.69    | NA | NA | NA | NA |
| -0.01 | 0.21  | -0.04 | 0.02  | 1 | 0.14     | 0.17     | 0.7     | NA | NA | NA | NA |
| 0     | 0.21  | -0.02 | 0.03  | 1 | 4.20E-06 | 0.5      | 0.35    | NA | NA | NA | NA |
| -0.05 | 0.22  | 0.03  | 0.11  | 1 | 0.084    | 0.34     | 0.0045  | NA | NA | NA | NA |
| 0     | -0.05 | 0.03  | 0.06  | 1 | 0.61     | 0.19     | 0.011   | NA | NA | NA | NA |
| 0     | -0.01 | -0.04 | 0.08  | 1 | 0.86     | 0.13     | 0.01    | NA | NA | NA | NA |
| 0     | 0.07  | -0.02 | 0.01  | 1 | 0.03     | 0.38     | 0.9     | NA | NA | NA | NA |
| 0     | -0.07 | -0.07 | -0.01 | 1 | 0.0046   | 0.0024   | 0.51    | NA | NA | NA | NA |
| 0.01  | -0.02 | 0     | 0.01  | 1 | 0.63     | 0.98     | 0.65    | NA | NA | NA | NA |
| 0     | 0.01  | 0.08  | 0.82  | 1 | 1        | 0.3      | 0.42    | NA | NA | NA | NA |
| 0     | 0.01  | -0.07 | -0.03 | 1 | 1        | 7.50E-06 | 0.058   | NA | NA | NA | NA |
| 0     | 0.01  | -0.04 | 0.02  | 1 | 1        | 0.37     | 0.66    | NA | NA | NA | NA |
| -0.07 | 0.85  | 0.03  | 0.07  | 1 | 0.064    | 0.48     | 0.061   | NA | NA | NA | NA |
| -0.02 | -0.02 | -0.06 | -0.03 | 1 | 0.69     | 0.1      | 0.36    | NA | NA | NA | NA |
| -0.01 | -0.04 | -0.01 | 0.02  | 1 | 0.14     | 0.49     | 0.19    | NA | NA | NA | NA |
| 0.05  | 0.14  | 0.01  | 0.02  | 1 | 0.67     | 0.86     | 0.63    | NA | NA | NA | NA |
| 0.01  | 0.21  | -0.02 | -0.03 | 1 | 0.026    | 0.52     | 0.35    | NA | NA | NA | NA |

|       |       |       |       |    |         |          |          |    |    |    |    |
|-------|-------|-------|-------|----|---------|----------|----------|----|----|----|----|
| 0     | 0.03  | -0.03 | -0.01 | 1  | 0.65    | 0.26     | 0.67     | NA | NA | NA | NA |
| 0     | 0.07  | 0.02  | 0.06  | 1  | 0.00012 | 0.01     | 7.00E-08 | NA | NA | NA | NA |
| 0.02  | -0.07 | 0.01  | 0.02  | 1  | 0.37    | 1        | 0.86     | NA | NA | NA | NA |
| 0     | NA    | NA    | NA    | 1  | NA      | NA       | NA       | NA | NA | NA | NA |
| 0.02  | -0.01 | -0.05 | 0.09  | 1  | 1       | 0.09     | 0.028    | NA | NA | NA | NA |
| 0.01  | 0.04  | -0.06 | -0.01 | 1  | 0.6     | 8.00E-04 | 0.75     | NA | NA | NA | NA |
| 0     | 0.16  | -0.06 | -0.05 | 1  | 0.4     | 0.083    | 0.14     | NA | NA | NA | NA |
| 0     | NA    | -0.11 | 0.1   | 1  | NA      | 0.11     | 0.36     | NA | NA | NA | NA |
| 0.02  | -0.02 | -0.15 | -0.06 | 1  | 1       | 9.80E-05 | 0.18     | NA | NA | NA | NA |
| -0.01 | -0.1  | -0.11 | -0.09 | 1  | 0.27    | 0.0011   | 0.028    | NA | NA | NA | NA |
| 0.07  | 0.19  | 0.01  | 0.05  | 1  | 0.025   | 0.97     | 0.092    | NA | NA | NA | NA |
| 0.01  | -0.09 | -0.07 | 0.01  | 1  | 0.77    | 0.035    | 0.91     | NA | NA | NA | NA |
| 0     | -0.03 | -0.05 | -0.01 | 1  | 0.49    | 0.00021  | 0.44     | NA | NA | NA | NA |
| 0.05  | -0.07 | -0.05 | -0.07 | 1  | 0.26    | 0.054    | 0.0066   | NA | NA | NA | NA |
| 0     | -0.01 | -0.05 | -0.08 | 1  | 0.81    | 0.1      | 0.00054  | NA | NA | NA | NA |
| -0.04 | NA    | 0.07  | 0.13  | 1  | NA      | 0.077    | 0.00052  | NA | NA | NA | NA |
| 0     | 0.32  | 0.04  | 0.01  | 1  | 0.47    | 0.34     | 0.93     | NA | NA | NA | NA |
| 0     | 0.1   | 0     | 0.02  | 1  | 0.27    | 1        | 0.44     | NA | NA | NA | NA |
| 0.09  | -0.1  | -0.16 | -0.06 | 1  | 0.88    | 3.20E-08 | 0.13     | NA | NA | NA | NA |
| 0.01  | 0.05  | -0.01 | 0.1   | 1  | 0.63    | 0.8      | 0.0016   | NA | NA | NA | NA |
| 0.04  | 0.49  | -0.14 | 0.32  | 1  | 0.0016  | 0.022    | 0.00096  | NA | NA | NA | NA |
| -0.05 | 0.59  | -0.08 | 0.07  | 1  | 0.12    | 9.00E-05 | 0.041    | NA | NA | NA | NA |
| 0.01  | 0.01  | -0.05 | 0.01  | 1  | 0.85    | 0.092    | 0.77     | NA | NA | NA | NA |
| 0     | -0.19 | -0.04 | 0.08  | 1  | 0.74    | 0.16     | 0.04     | NA | NA | NA | NA |
| -0.02 | 0.16  | -0.04 | 0.13  | 1  | 0.12    | 0.23     | 0.023    | NA | NA | NA | NA |
| 0.01  | -0.02 | -0.05 | 0.03  | 1  | 0.72    | 0.0071   | 0.1      | NA | NA | NA | NA |
| NA    | NA    | NA    | NA    | NA | NA      | NA       | NA       | NA | NA | NA | NA |
| NA    | NA    | -0.12 | -0.05 | NA | NA      | 0.46     | 0.9      | NA | NA | NA | NA |
| NA    | NA    | -0.5  | 0     | NA | NA      | 0.45     | 1        | NA | NA | NA | NA |
| NA    | NA    | 0     | 0.1   | NA | NA      | 1        | 0.22     | NA | NA | NA | NA |

|    |       |       |       |    |          |         |         |    |    |    |    |
|----|-------|-------|-------|----|----------|---------|---------|----|----|----|----|
| NA | NA    | 0.04  | 0.14  | NA | NA       | 0.41    | 0.0096  | NA | NA | NA | NA |
| NA | NA    | -0.06 | -0.07 | NA | NA       | 0.26    | 0.23    | NA | NA | NA | NA |
| NA | NA    | 0.02  | 0.08  | NA | NA       | 1       | 0.83    | NA | NA | NA | NA |
| NA | 0.02  | -0.12 | 0.22  | NA | 1        | 0.45    | 0.75    | NA | NA | NA | NA |
| NA | NA    | -0.05 | 0.07  | NA | NA       | 0.2     | 0.062   | NA | NA | NA | NA |
| NA | NA    | 0.1   | 0.08  | NA | NA       | 0.041   | 0.087   | NA | NA | NA | NA |
| NA | 0.02  | -0.06 | 0.03  | NA | 0.73     | 0.08    | 0.37    | NA | NA | NA | NA |
| NA | NA    | 0.08  | 0.06  | NA | NA       | 0.15    | 0.44    | NA | NA | NA | NA |
| NA | NA    | -0.07 | -0.06 | NA | NA       | 0.1     | 0.34    | NA | NA | NA | NA |
| NA | NA    | -0.04 | NA    | NA | NA       | 0.87    | NA      | NA | NA | NA | NA |
| NA | NA    | NA    | NA    | NA | NA       | NA      | NA      | NA | NA | NA | NA |
| NA | 0.03  | -0.09 | 0.13  | NA | 1        | 0.028   | 0.023   | NA | NA | NA | NA |
| NA | NA    | 0.21  | 0.25  | NA | NA       | 0.0012  | 0.00015 | NA | NA | NA | NA |
| NA | NA    | 0.01  | -0.04 | NA | NA       | 0.99    | 1       | NA | NA | NA | NA |
| NA | 0.28  | -0.11 | 0.13  | NA | 0.084    | 0.00053 | 0.003   | NA | NA | NA | NA |
| NA | NA    | 0.13  | 0.88  | NA | NA       | 0.024   | 0.27    | NA | NA | NA | NA |
| NA | NA    | 0.24  | NA    | NA | NA       | 0.17    | NA      | NA | NA | NA | NA |
| NA | NA    | NA    | NA    | NA | NA       | NA      | NA      | NA | NA | NA | NA |
| NA | NA    | 0     | 0.11  | NA | NA       | 1       | 0.18    | NA | NA | NA | NA |
| NA | -0.1  | -0.02 | 0     | NA | 0.98     | 0.48    | 0.98    | NA | NA | NA | NA |
| NA | -0.44 | 0.03  | 0.02  | NA | 6.90E-08 | 0.47    | 0.78    | NA | NA | NA | NA |
| NA | NA    | -0.02 | -0.07 | NA | NA       | 0.9     | 0.19    | NA | NA | NA | NA |
| NA | NA    | NA    | NA    | NA | NA       | NA      | NA      | NA | NA | NA | NA |
| NA | NA    | 0.11  | -0.01 | NA | NA       | 0.14    | 1       | NA | NA | NA | NA |
| NA | NA    | -0.06 | 0.03  | NA | NA       | 0.064   | 0.54    | NA | NA | NA | NA |
| NA | 0.85  | NA    | NA    | NA | 4.30E-05 | NA      | NA      | NA | NA | NA | NA |
| NA | NA    | -0.23 | 0.67  | NA | NA       | 0.15    | 0.35    | NA | NA | NA | NA |
| NA | NA    | 0.01  | -0.08 | NA | NA       | 1       | 0.27    | NA | NA | NA | NA |
| NA | -0.05 | -0.07 | 0.09  | NA | 1        | 0.11    | 0.083   | NA | NA | NA | NA |
| NA | NA    | -0.16 | -0.11 | NA | NA       | 0.18    | 1       | NA | NA | NA | NA |

|    |       |       |       |    |        |          |         |    |    |    |    |
|----|-------|-------|-------|----|--------|----------|---------|----|----|----|----|
| NA | NA    | -0.1  | -0.06 | NA | NA     | 0.35     | 0.51    | NA | NA | NA | NA |
| NA | 0.02  | 0.02  | 0.14  | NA | 1      | 0.67     | 0.00011 | NA | NA | NA | NA |
| NA | NA    | -0.27 | -0.16 | NA | NA     | 0.039    | 0.98    | NA | NA | NA | NA |
| NA | NA    | -0.03 | -0.03 | NA | NA     | 0.51     | 0.62    | NA | NA | NA | NA |
| NA | NA    | -0.02 | -0.09 | NA | NA     | 1        | 0.49    | NA | NA | NA | NA |
| NA | NA    | 0.09  | 0.02  | NA | NA     | 0.43     | 0.86    | NA | NA | NA | NA |
| NA | NA    | 0.02  | 0.19  | NA | NA     | 0.78     | 0.07    | NA | NA | NA | NA |
| NA | 0.34  | -0.03 | 0     | NA | 0.025  | 0.44     | 1       | NA | NA | NA | NA |
| NA | 0.05  | -0.02 | 0.08  | NA | 0.27   | 0.56     | 0.069   | NA | NA | NA | NA |
| NA | NA    | 0.03  | 0.11  | NA | NA     | 1        | 0.54    | NA | NA | NA | NA |
| NA | NA    | NA    | NA    | NA | NA     | NA       | NA      | NA | NA | NA | NA |
| NA | NA    | NA    | NA    | NA | NA     | NA       | NA      | NA | NA | NA | NA |
| NA | NA    | -0.16 | 0.11  | NA | NA     | 0.1      | 0.34    | NA | NA | NA | NA |
| NA | NA    | -0.07 | NA    | NA | NA     | 0.84     | NA      | NA | NA | NA | NA |
| NA | 0.72  | -0.1  | -0.03 | NA | 0.0018 | 0.18     | 0.86    | NA | NA | NA | NA |
| NA | 0.68  | NA    | NA    | NA | 0.047  | NA       | NA      | NA | NA | NA | NA |
| NA | -0.04 | -0.01 | 0.04  | NA | 0.9    | 1        | 0.75    | NA | NA | NA | NA |
| NA | NA    | 0.03  | 0.03  | NA | NA     | 0.77     | 0.57    | NA | NA | NA | NA |
| NA | NA    | NA    | 0.66  | NA | NA     | NA       | 0.011   | NA | NA | NA | NA |
| NA | NA    | -0.12 | 0.09  | NA | NA     | 0.7      | 1       | NA | NA | NA | NA |
| NA | -0.01 | -0.04 | 0.07  | NA | 1      | 0.83     | 0.31    | NA | NA | NA | NA |
| NA | -0.08 | 0.09  | 0.05  | NA | 1      | 0.091    | 0.44    | NA | NA | NA | NA |
| NA | NA    | -0.09 | -0.01 | NA | NA     | 0.16     | 0.95    | NA | NA | NA | NA |
| NA | NA    | -0.05 | 0.82  | NA | NA     | 0.8      | 0.46    | NA | NA | NA | NA |
| NA | NA    | -0.04 | 0.9   | NA | NA     | 0.96     | 0.00016 | NA | NA | NA | NA |
| NA | NA    | -0.15 | NA    | NA | NA     | 0.76     | NA      | NA | NA | NA | NA |
| NA | NA    | -0.02 | NA    | NA | NA     | 1        | NA      | NA | NA | NA | NA |
| NA | 0.01  | 0.02  | 0.12  | NA | 1      | 0.53     | 0.00046 | NA | NA | NA | NA |
| NA | 0.11  | -0.09 | 0     | NA | 0.23   | 0.035    | 1       | NA | NA | NA | NA |
| NA | -0.1  | -0.21 | -0.11 | NA | 0.58   | 6.70E-05 | 0.12    | NA | NA | NA | NA |

|    |       |       |       |    |        |        |       |    |    |    |    |
|----|-------|-------|-------|----|--------|--------|-------|----|----|----|----|
| NA | NA    | NA    | NA    | NA | NA     | NA     | NA    | NA | NA | NA | NA |
| NA | 0     | -0.12 | 0.03  | NA | 1      | 0.19   | 0.8   | NA | NA | NA | NA |
| NA | -0.08 | -0.03 | 0.03  | NA | 1      | 0.72   | 1     | NA | NA | NA | NA |
| NA | NA    | NA    | NA    | NA | NA     | NA     | NA    | NA | NA | NA | NA |
| NA | NA    | 0.06  | 0.12  | NA | NA     | 0.21   | 0.2   | NA | NA | NA | NA |
| NA | NA    | 0.02  | 0.05  | NA | NA     | 0.81   | 0.21  | NA | NA | NA | NA |
| NA | NA    | 0.13  | NA    | NA | NA     | 0.48   | NA    | NA | NA | NA | NA |
| NA | NA    | -0.05 | -0.01 | NA | NA     | 0.12   | 1     | NA | NA | NA | NA |
| NA | 0.08  | -0.04 | 0     | NA | 0.46   | 0.39   | 1     | NA | NA | NA | NA |
| NA | 0.25  | -0.01 | -0.02 | NA | 0.0013 | 0.9    | 0.79  | NA | NA | NA | NA |
| NA | 0.1   | 0.02  | 0.07  | NA | 0.92   | 0.76   | 0.79  | NA | NA | NA | NA |
| NA | NA    | 0.19  | NA    | NA | NA     | 0.46   | NA    | NA | NA | NA | NA |
| NA | 0     | 0.02  | -0.01 | NA | 1      | 0.98   | 1     | NA | NA | NA | NA |
| NA | 0.08  | -0.02 | 0.09  | NA | 0.097  | 0.36   | 0.002 | NA | NA | NA | NA |
| NA | NA    | -0.18 | -0.14 | NA | NA     | 0.021  | 0.059 | NA | NA | NA | NA |
| NA | NA    | -0.03 | 0.39  | NA | NA     | 0.93   | 0.002 | NA | NA | NA | NA |
| NA | 0.01  | 0.01  | 0.03  | NA | 1      | 0.96   | 0.63  | NA | NA | NA | NA |
| NA | NA    | -0.03 | 0.02  | NA | NA     | 0.79   | 0.86  | NA | NA | NA | NA |
| NA | 0.13  | -0.11 | -0.11 | NA | 1      | 0.0021 | 0.066 | NA | NA | NA | NA |
| NA | 0.8   | 0.01  | -0.01 | NA | 0.033  | 1      | 1     | NA | NA | NA | NA |
| NA | NA    | -0.03 | 0     | NA | NA     | 0.7    | 1     | NA | NA | NA | NA |
| NA | NA    | NA    | NA    | NA | NA     | NA     | NA    | NA | NA | NA | NA |
| NA | NA    | NA    | NA    | NA | NA     | NA     | NA    | NA | NA | NA | NA |
| NA | -0.02 | -0.02 | 0     | NA | 1      | 0.86   | 1     | NA | NA | NA | NA |
| NA | NA    | -0.09 | -0.13 | NA | NA     | 0.15   | 0.4   | NA | NA | NA | NA |
| NA | NA    | -0.16 | -0.07 | NA | NA     | 0.24   | 0.45  | NA | NA | NA | NA |
| NA | NA    | -0.03 | -0.06 | NA | NA     | 0.74   | 0.27  | NA | NA | NA | NA |
| NA | NA    | -0.12 | -0.09 | NA | NA     | 0.21   | 0.5   | NA | NA | NA | NA |
| NA | 0.06  | -0.08 | -0.05 | NA | 0.2    | 0.0051 | 0.16  | NA | NA | NA | NA |
| NA | NA    | -0.12 | NA    | NA | NA     | 0.5    | NA    | NA | NA | NA | NA |

|    |       |       |       |    |       |          |        |    |    |    |    |
|----|-------|-------|-------|----|-------|----------|--------|----|----|----|----|
| NA | -0.11 | 0.02  | 0.15  | NA | 0.33  | 0.72     | 0.0033 | NA | NA | NA | NA |
| NA | -0.3  | -0.06 | 0.02  | NA | 0.22  | 0.0051   | 0.65   | NA | NA | NA | NA |
| NA | 0.71  | 0.14  | 0.7   | NA | 0.097 | 0.44     | 0.69   | NA | NA | NA | NA |
| NA | -0.07 | -0.18 | -0.03 | NA | 1     | 0.0012   | 0.88   | NA | NA | NA | NA |
| NA | -0.06 | 0.03  | -0.02 | NA | 1     | 0.76     | 0.92   | NA | NA | NA | NA |
| NA | 0.05  | 0.02  | 0.11  | NA | 1     | 0.79     | 0.36   | NA | NA | NA | NA |
| NA | NA    | -0.06 | NA    | NA | NA    | 0.81     | NA     | NA | NA | NA | NA |
| NA | 0.05  | -0.02 | 0.01  | NA | 0.51  | 0.61     | 0.98   | NA | NA | NA | NA |
| NA | 0.02  | -0.15 | -0.11 | NA | 1     | 0.069    | 0.34   | NA | NA | NA | NA |
| NA | NA    | 0     | 0.15  | NA | NA    | 1        | 0.065  | NA | NA | NA | NA |
| NA | NA    | NA    | NA    | NA | NA    | NA       | NA     | NA | NA | NA | NA |
| NA | NA    | NA    | NA    | NA | NA    | NA       | NA     | NA | NA | NA | NA |
| NA | 0.08  | 0     | -0.01 | NA | 0.46  | 1        | 0.74   | NA | NA | NA | NA |
| NA | 0.15  | -0.14 | 0.15  | NA | 0.23  | 0.38     | 0.42   | NA | NA | NA | NA |
| NA | NA    | -0.02 | 0.09  | NA | NA    | 0.58     | 0.0082 | NA | NA | NA | NA |
| NA | NA    | NA    | NA    | NA | NA    | NA       | NA     | NA | NA | NA | NA |
| NA | 0.33  | 0     | -0.04 | NA | 0.24  | 1        | 0.58   | NA | NA | NA | NA |
| NA | NA    | -0.05 | -0.03 | NA | NA    | 0.2      | 0.56   | NA | NA | NA | NA |
| NA | 0.17  | 0.02  | 0.01  | NA | 0.85  | 0.72     | 1      | NA | NA | NA | NA |
| NA | NA    | 0     | 0.11  | NA | NA    | 1        | 0.044  | NA | NA | NA | NA |
| NA | NA    | NA    | NA    | NA | NA    | NA       | NA     | NA | NA | NA | NA |
| NA | -0.42 | 0.02  | 0.13  | NA | 0.42  | 0.81     | 0.0056 | NA | NA | NA | NA |
| NA | 0.06  | -0.26 | 0.11  | NA | 1     | 0.098    | 1      | NA | NA | NA | NA |
| NA | NA    | -0.08 | NA    | NA | NA    | 0.76     | NA     | NA | NA | NA | NA |
| NA | NA    | -0.35 | NA    | NA | NA    | 3.60E-07 | NA     | NA | NA | NA | NA |
| NA | NA    | NA    | NA    | NA | NA    | NA       | NA     | NA | NA | NA | NA |
| NA | NA    | 0.01  | 0     | NA | NA    | 0.95     | 1      | NA | NA | NA | NA |
| NA | NA    | 0.05  | 0.02  | NA | NA    | 1        | 1      | NA | NA | NA | NA |
| NA | NA    | 0.16  | 0.67  | NA | NA    | 0.12     | 0.033  | NA | NA | NA | NA |
| NA | NA    | 0.17  | NA    | NA | NA    | 1        | NA     | NA | NA | NA | NA |

|       |       |       |       |          |          |          |         |    |    |    |    |
|-------|-------|-------|-------|----------|----------|----------|---------|----|----|----|----|
| NA    | NA    | -0.1  | 0.02  | NA       | NA       | 0.37     | 1       | NA | NA | NA | NA |
| NA    | NA    | -0.04 | -0.1  | NA       | NA       | 0.85     | 0.22    | NA | NA | NA | NA |
| NA    | NA    | NA    | NA    | NA       | NA       | NA       | NA      | NA | NA | NA | NA |
| NA    | NA    | -0.13 | -0.07 | NA       | NA       | 0.025    | 0.36    | NA | NA | NA | NA |
| NA    | NA    | -0.05 | 0.83  | NA       | NA       | 0.9      | 0.44    | NA | NA | NA | NA |
| NA    | -0.15 | 0.02  | 0.04  | NA       | 0.52     | 1        | 0.63    | NA | NA | NA | NA |
| NA    | 0     | -0.06 | 0.02  | NA       | 1        | 0.091    | 0.64    | NA | NA | NA | NA |
| -0.22 | -0.06 | -0.04 | 0.01  | 2.50E-09 | 0.13     | 0.071    | 0.51    | NA | NA | NA | NA |
| -0.1  | -0.06 | -0.04 | -0.04 | 6.60E-09 | 0.0038   | 0.0039   | 0.0051  | NA | NA | NA | NA |
| 0.46  | 0.01  | -0.03 | 0.02  | 2.00E-08 | 0.91     | 0.081    | 0.36    | NA | NA | NA | NA |
| -0.13 | -0.09 | -0.06 | -0.04 | 2.60E-08 | 0.0015   | 0.00043  | 0.022   | NA | NA | NA | NA |
| 0.42  | 0.33  | -0.25 | 0.21  | 9.00E-08 | 0.00014  | 0.00012  | 0.13    | NA | NA | NA | NA |
| -0.61 | -0.58 | -0.23 | -0.24 | 6.40E-07 | 7.90E-05 | 0.00014  | 0.00019 | NA | NA | NA | NA |
| -0.46 | -0.43 | -0.03 | -0.01 | 9.20E-07 | 2.10E-06 | 0.75     | 1       | NA | NA | NA | NA |
| -0.17 | -0.04 | -0.07 | 0     | 1.10E-06 | 0.37     | 0.019    | 0.98    | NA | NA | NA | NA |
| -0.1  | 0.01  | -0.03 | 0.02  | 1.10E-06 | 0.79     | 0.007    | 0.11    | NA | NA | NA | NA |
| -0.08 | -0.02 | -0.04 | -0.02 | 1.30E-06 | 0.27     | 0.00063  | 0.22    | NA | NA | NA | NA |
| -0.19 | -0.2  | -0.08 | -0.03 | 1.60E-06 | 1.50E-07 | 1.40E-05 | 0.2     | NA | NA | NA | NA |
| -0.16 | -0.11 | -0.01 | 0.03  | 1.80E-06 | 0.0057   | 0.35     | 0.071   | NA | NA | NA | NA |
| -0.11 | -0.07 | -0.07 | -0.03 | 3.20E-06 | 0.011    | 9.60E-06 | 0.061   | NA | NA | NA | NA |
| -0.23 | -0.15 | -0.09 | -0.07 | 3.70E-06 | 0.016    | 0.0012   | 0.014   | NA | NA | NA | NA |
| -0.1  | -0.07 | -0.04 | 0.01  | 4.10E-06 | 0.0093   | 0.044    | 0.82    | NA | NA | NA | NA |
| -0.46 | -0.47 | -0.04 | -0.06 | 6.60E-06 | 3.10E-07 | 0.35     | 0.032   | NA | NA | NA | NA |
| 0.12  | 0.02  | -0.02 | -0.04 | 1.60E-05 | 0.38     | 0.24     | 0.0029  | NA | NA | NA | NA |
| -0.19 | -0.15 | -0.06 | 0     | 1.70E-05 | 0.0019   | 0.00013  | 0.97    | NA | NA | NA | NA |
| 0.57  | -0.04 | 0     | 0.14  | 1.90E-05 | 0.88     | 1        | 0.074   | NA | NA | NA | NA |
| -0.07 | -0.04 | -0.03 | -0.02 | 1.90E-05 | 0.0096   | 2.00E-04 | 0.016   | NA | NA | NA | NA |
| -0.09 | -0.04 | -0.03 | -0.03 | 2.00E-05 | 0.15     | 0.13     | 0.061   | NA | NA | NA | NA |
| 0.16  | 0.14  | -0.07 | -0.01 | 2.30E-05 | 0.00052  | 0.016    | 0.88    | NA | NA | NA | NA |
| -0.16 | -0.14 | 0.05  | 0.08  | 3.10E-05 | 0.00045  | 0.31     | 0.073   | NA | NA | NA | NA |



|       |       |       |       |          |          |          |          |    |    |    |    |
|-------|-------|-------|-------|----------|----------|----------|----------|----|----|----|----|
| 0.27  | -0.05 | -0.06 | 0.03  | 4.60E-05 | 0.12     | 0.11     | 0.48     | NA | NA | NA | NA |
| -0.11 | -0.1  | -0.07 | -0.04 | 5.00E-05 | 5.50E-05 | 2.30E-05 | 0.037    | NA | NA | NA | NA |
| -0.15 | 0.08  | -0.06 | -0.05 | 5.30E-05 | 0.093    | 0.00068  | 0.0055   | NA | NA | NA | NA |
| -0.05 | -0.02 | -0.03 | 0.01  | 7.00E-05 | 0.42     | 0.0024   | 0.55     | NA | NA | NA | NA |
| -0.22 | 0.03  | -0.08 | -0.03 | 7.20E-05 | 0.65     | 0.0093   | 0.48     | NA | NA | NA | NA |
| -0.13 | -0.14 | -0.05 | -0.18 | 7.60E-05 | 3.70E-05 | 0.12     | 7.60E-05 | NA | NA | NA | NA |
| -0.11 | -0.08 | -0.01 | 0.05  | 0.00016  | 0.013    | 0.48     | 0.0045   | NA | NA | NA | NA |
| -0.16 | 0     | 0     | 0.03  | 0.00017  | 1        | 0.98     | 0.35     | NA | NA | NA | NA |
| -0.17 | 0.01  | -0.04 | -0.01 | 0.00019  | 0.97     | 0.072    | 0.85     | NA | NA | NA | NA |
| -0.14 | -0.09 | -0.01 | 0.04  | 2.00E-04 | 0.03     | 0.92     | 0.41     | NA | NA | NA | NA |
| -0.06 | -0.06 | 0.04  | 0.07  | 0.00022  | 0.00012  | 0.00054  | 6.10E-07 | NA | NA | NA | NA |
| -0.14 | -0.02 | 0     | 0.11  | 0.00022  | 0.74     | 0.94     | 0.0012   | NA | NA | NA | NA |
| -0.08 | -0.06 | -0.04 | -0.03 | 0.00026  | 0.014    | 0.0037   | 0.05     | NA | NA | NA | NA |
| -0.18 | -0.1  | -0.06 | 0     | 0.00027  | 0.16     | 0.025    | 0.93     | NA | NA | NA | NA |
| 0.22  | 0.05  | -0.03 | 0     | 0.00027  | 0.34     | 0.28     | 0.99     | NA | NA | NA | NA |
| -0.06 | -0.06 | -0.01 | 0.03  | 0.00027  | 0.00034  | 0.63     | 0.025    | NA | NA | NA | NA |
| 0.26  | 0.02  | 0     | 0.07  | 3.00E-04 | 0.83     | 0.95     | 0.016    | NA | NA | NA | NA |
| 0.35  | 0.1   | -0.04 | 0     | 0.00032  | 0.24     | 0.39     | 1        | NA | NA | NA | NA |
| -0.07 | -0.03 | -0.03 | -0.01 | 0.00032  | 0.28     | 0.31     | 0.52     | NA | NA | NA | NA |
| -0.12 | -0.1  | -0.08 | -0.12 | 0.00033  | 0.0016   | 0.00013  | 3.40E-06 | NA | NA | NA | NA |
| -0.11 | -0.04 | -0.06 | 0.01  | 0.00033  | 0.43     | 0.014    | 0.77     | NA | NA | NA | NA |
| -0.07 | -0.02 | -0.04 | 0.03  | 0.00039  | 0.29     | 0.011    | 0.13     | NA | NA | NA | NA |
| -0.11 | 0.01  | -0.05 | 0.13  | 0.00039  | 0.98     | 0.056    | 0.00013  | NA | NA | NA | NA |
| -0.09 | 0.03  | -0.09 | -0.06 | 0.00042  | 0.45     | 8.00E-07 | 0.028    | NA | NA | NA | NA |
| -0.18 | -0.07 | -0.02 | 0.05  | 0.00045  | 0.17     | 0.47     | 0.045    | NA | NA | NA | NA |
| -0.19 | -0.16 | -0.13 | 0.07  | 0.00059  | 0.001    | 4.80E-07 | 0.024    | NA | NA | NA | NA |
| -0.13 | -0.05 | -0.04 | 0.03  | 6.00E-04 | 0.35     | 0.18     | 0.49     | NA | NA | NA | NA |
| -0.08 | 0.01  | -0.11 | -0.08 | 0.00061  | 0.87     | 2.70E-08 | 0.0014   | NA | NA | NA | NA |
| -0.07 | -0.06 | -0.04 | 0.02  | 0.00063  | 0.00046  | 0.0041   | 0.14     | NA | NA | NA | NA |
| -0.13 | -0.04 | -0.02 | 0.09  | 0.00068  | 0.44     | 0.47     | 0.0057   | NA | NA | NA | NA |

|       |       |       |       |        |          |          |          |    |    |    |    |
|-------|-------|-------|-------|--------|----------|----------|----------|----|----|----|----|
| 0.66  | -0.17 | -0.03 | 0.09  | 0.0011 | 0.29     | 0.33     | 0.011    | NA | NA | NA | NA |
| 0.1   | 0.12  | -0.05 | 0.08  | 0.0011 | 5.00E-05 | 0.044    | 0.0029   | NA | NA | NA | NA |
| 0.5   | 0.33  | 0.03  | 0.13  | 0.0013 | 0.0047   | 0.8      | 0.66     | NA | NA | NA | NA |
| 0.13  | 0.02  | -0.01 | 0.12  | 0.0013 | 0.5      | 0.42     | 3.90E-06 | NA | NA | NA | NA |
| -0.14 | -0.14 | -0.01 | 0.01  | 0.0015 | 0.00016  | 0.56     | 0.84     | NA | NA | NA | NA |
| 0.19  | 0.25  | -0.04 | -0.05 | 0.0015 | 7.20E-08 | 0.18     | 0.074    | NA | NA | NA | NA |
| -0.06 | 0     | -0.03 | 0.02  | 0.0016 | 0.93     | 0.077    | 0.24     | NA | NA | NA | NA |
| -0.26 | -0.11 | -0.02 | 0.11  | 0.0016 | 0.44     | 0.44     | 0.00021  | NA | NA | NA | NA |
| -0.09 | -0.09 | -0.08 | -0.02 | 0.0017 | 0.00041  | 1.20E-08 | 0.19     | NA | NA | NA | NA |
| 0.04  | 0.05  | -0.07 | -0.04 | 0.0018 | 3.00E-04 | 8.60E-08 | 0.011    | NA | NA | NA | NA |
| -0.04 | -0.01 | -0.05 | 0.01  | 0.0019 | 0.4      | 0.00013  | 0.27     | NA | NA | NA | NA |
| -0.04 | 0.01  | -0.04 | -0.03 | 0.002  | 0.62     | 0.00031  | 0.029    | NA | NA | NA | NA |
| 0.07  | 0.04  | -0.05 | 0.01  | 0.0021 | 0.011    | 0.00062  | 0.72     | NA | NA | NA | NA |
| -0.08 | -0.06 | 0.01  | 0.09  | 0.0029 | 0.021    | 0.35     | 1.10E-07 | NA | NA | NA | NA |
| 0.05  | 0.02  | -0.01 | 0.03  | 0.0033 | 0.43     | 0.32     | 0.044    | NA | NA | NA | NA |
| 0.21  | -0.07 | -0.06 | 0.02  | 0.0033 | 0.054    | 0.071    | 0.7      | NA | NA | NA | NA |
| -0.04 | -0.02 | -0.03 | 0.03  | 0.0038 | 0.15     | 6.00E-05 | 0.0019   | NA | NA | NA | NA |
| -0.06 | -0.06 | -0.07 | -0.05 | 0.004  | 0.0079   | 0.0035   | 0.053    | NA | NA | NA | NA |
| -0.05 | -0.04 | -0.03 | 0.01  | 0.0041 | 0.028    | 0.0053   | 0.52     | NA | NA | NA | NA |
| -0.07 | -0.05 | -0.02 | 0.02  | 0.0044 | 0.034    | 0.27     | 0.31     | NA | NA | NA | NA |
| -0.08 | -0.08 | -0.03 | 0.04  | 0.0046 | 0.0093   | 0.02     | 0.0037   | NA | NA | NA | NA |
| 0.05  | 0.05  | -0.05 | 0.01  | 0.005  | 0.022    | 0.00054  | 0.56     | NA | NA | NA | NA |
| 0.04  | 0.03  | -0.06 | -0.02 | 0.0051 | 0.02     | 1.20E-07 | 0.11     | NA | NA | NA | NA |
| -0.43 | -0.42 | 0.15  | 0.1   | 0.0051 | 0.011    | 0.0012   | 0.21     | NA | NA | NA | NA |
| -0.03 | -0.01 | -0.05 | -0.01 | 0.0052 | 0.36     | 8.90E-09 | 0.37     | NA | NA | NA | NA |
| 0.06  | 0.01  | -0.09 | -0.02 | 0.0059 | 0.43     | 4.40E-09 | 0.38     | NA | NA | NA | NA |
| -0.16 | -0.15 | -0.08 | -0.01 | 0.006  | 0.0054   | 0.011    | 0.74     | NA | NA | NA | NA |
| -0.22 | -0.11 | -0.05 | 0.04  | 0.0065 | 0.43     | 0.0083   | 0.3      | NA | NA | NA | NA |
| -0.05 | -0.01 | -0.07 | -0.04 | 0.0072 | 0.68     | 2.00E-06 | 0.0013   | NA | NA | NA | NA |
| -0.13 | 0.02  | 0.02  | 0     | 0.0072 | 0.85     | 0.6      | 1        | NA | NA | NA | NA |

|       |       |       |       |        |          |          |          |    |    |    |    |
|-------|-------|-------|-------|--------|----------|----------|----------|----|----|----|----|
| -0.08 | -0.09 | -0.08 | -0.02 | 0.0073 | 0.00028  | 1.20E-07 | 0.17     | NA | NA | NA | NA |
| -0.09 | -0.09 | -0.04 | -0.01 | 0.0081 | 0.0041   | 0.081    | 0.52     | NA | NA | NA | NA |
| 0.06  | 0     | -0.06 | 0.01  | 0.0081 | 0.91     | 7.10E-07 | 0.6      | NA | NA | NA | NA |
| 0.89  | NA    | -0.16 | -0.02 | 0.0082 | NA       | 0.0015   | 0.91     | NA | NA | NA | NA |
| -0.21 | -0.2  | -0.06 | 0     | 0.0083 | 0.02     | 0.051    | 1        | NA | NA | NA | NA |
| -0.03 | 0.09  | -0.08 | -0.04 | 0.0085 | 6.30E-09 | 1.50E-08 | 0.0045   | NA | NA | NA | NA |
| -0.15 | 0.17  | -0.01 | 0.11  | 0.0087 | 0.14     | 0.74     | 0.00073  | NA | NA | NA | NA |
| -0.04 | 0.01  | -0.01 | 0.04  | 0.0089 | 0.96     | 0.74     | 0.022    | NA | NA | NA | NA |
| -0.04 | 0     | -0.02 | 0.01  | 0.0092 | 0.99     | 0.15     | 0.28     | NA | NA | NA | NA |
| -0.06 | 0.05  | 0     | 0.05  | 0.0094 | 0.12     | 0.91     | 4.30E-05 | NA | NA | NA | NA |
| -0.03 | -0.01 | -0.06 | -0.03 | 0.0094 | 0.65     | 7.90E-08 | 0.012    | NA | NA | NA | NA |
| -0.09 | -0.02 | -0.02 | 0.03  | 0.0096 | 0.8      | 0.42     | 0.25     | NA | NA | NA | NA |
| -0.03 | -0.03 | -0.04 | 0.02  | 0.0096 | 0.0094   | 3.20E-06 | 0.048    | NA | NA | NA | NA |
| 0.11  | 0     | -0.09 | -0.01 | 0.0097 | 1        | 7.00E-05 | 0.71     | NA | NA | NA | NA |
| -0.05 | 0     | -0.05 | 0     | 0.0098 | 1        | 5.80E-05 | 0.86     | NA | NA | NA | NA |
| -0.23 | -0.29 | -0.06 | -0.02 | 0.01   | 1.30E-06 | 0.26     | 0.78     | NA | NA | NA | NA |
| -0.06 | 0.03  | -0.05 | -0.03 | 0.01   | 0.29     | 0.013    | 0.14     | NA | NA | NA | NA |
| -0.05 | -0.08 | -0.01 | 0.04  | 0.011  | 1.80E-05 | 0.64     | 0.019    | NA | NA | NA | NA |
| 0.23  | 0.13  | -0.09 | -0.05 | 0.011  | 0.46     | 0.0011   | 0.062    | NA | NA | NA | NA |
| -0.11 | 0.18  | -0.16 | -0.1  | 0.011  | 0.079    | 9.40E-06 | 0.0013   | NA | NA | NA | NA |
| 0.12  | 0.09  | -0.02 | 0.02  | 0.011  | 0.0041   | 0.16     | 0.31     | NA | NA | NA | NA |
| -0.05 | -0.01 | -0.05 | -0.05 | 0.011  | 0.55     | 1.90E-05 | 0.00019  | NA | NA | NA | NA |
| -0.08 | 0.08  | -0.09 | -0.07 | 0.011  | 0.018    | 0.00026  | 0.011    | NA | NA | NA | NA |
| -0.04 | 0.03  | -0.07 | 0.03  | 0.012  | 0.13     | 8.00E-06 | 0.19     | NA | NA | NA | NA |
| 0.18  | 0.07  | -0.09 | 0.03  | 0.012  | 0.32     | 0.0022   | 0.47     | NA | NA | NA | NA |
| 0.04  | 0.04  | -0.02 | 0.06  | 0.012  | 0.018    | 0.046    | 2.90E-05 | NA | NA | NA | NA |
| -0.12 | -0.04 | -0.04 | 0.1   | 0.012  | 0.63     | 0.32     | 0.0035   | NA | NA | NA | NA |
| -0.09 | -0.07 | -0.04 | -0.03 | 0.014  | 0.54     | 0.082    | 0.33     | NA | NA | NA | NA |
| 0.1   | 0     | -0.03 | 0.01  | 0.015  | 1        | 0.18     | 0.7      | NA | NA | NA | NA |
| -0.03 | 0     | -0.02 | 0.03  | 0.015  | 0.89     | 0.045    | 0.0091   | NA | NA | NA | NA |

|       |       |       |       |       |          |          |          |    |    |    |    |
|-------|-------|-------|-------|-------|----------|----------|----------|----|----|----|----|
| -0.06 | 0.08  | -0.08 | -0.05 | 0.016 | 0.028    | 4.70E-06 | 0.0052   | NA | NA | NA | NA |
| 0.19  | -0.03 | -0.06 | -0.07 | 0.018 | 0.97     | 0.058    | 0.036    | NA | NA | NA | NA |
| -0.09 | -0.06 | 0     | 0.13  | 0.02  | 0.19     | 0.99     | 1.70E-06 | NA | NA | NA | NA |
| 0.38  | 0.6   | -0.13 | 0.15  | 0.02  | 0.0013   | 0.035    | 0.2      | NA | NA | NA | NA |
| 0.13  | -0.04 | -0.05 | -0.08 | 0.021 | 0.38     | 0.12     | 7.80E-05 | NA | NA | NA | NA |
| -0.09 | 0.02  | -0.04 | 0.09  | 0.022 | 0.65     | 0.031    | 1.00E-04 | NA | NA | NA | NA |
| -0.05 | -0.01 | 0     | 0.03  | 0.022 | 0.54     | 0.77     | 0.027    | NA | NA | NA | NA |
| 0.47  | 0.47  | -0.11 | 0.17  | 0.022 | 0.093    | 0.099    | 0.038    | NA | NA | NA | NA |
| -0.09 | -0.05 | -0.04 | -0.07 | 0.022 | 0.46     | 0.28     | 0.011    | NA | NA | NA | NA |
| -0.03 | -0.03 | -0.03 | -0.01 | 0.022 | 0.059    | 0.015    | 0.66     | NA | NA | NA | NA |
| 0.1   | -0.02 | 0.05  | 0.1   | 0.024 | 0.64     | 0.12     | 0.0022   | NA | NA | NA | NA |
| 0.1   | 0.06  | 0     | 0.04  | 0.025 | 0.24     | 1        | 0.24     | NA | NA | NA | NA |
| -0.06 | 0.02  | 0.01  | -0.05 | 0.025 | 0.64     | 0.88     | 0.077    | NA | NA | NA | NA |
| -0.12 | -0.1  | 0.03  | 0.06  | 0.025 | 0.059    | 0.54     | 0.13     | NA | NA | NA | NA |
| -0.06 | 0.09  | -0.04 | -0.05 | 0.028 | 0.013    | 0.034    | 0.015    | NA | NA | NA | NA |
| -0.08 | -0.06 | -0.08 | -0.05 | 0.028 | 0.17     | 0.0017   | 0.11     | NA | NA | NA | NA |
| -0.04 | 0.01  | -0.03 | 0     | 0.028 | 0.55     | 0.006    | 0.92     | NA | NA | NA | NA |
| -0.32 | -0.05 | -0.03 | -0.01 | 0.029 | 0.83     | 0.4      | 0.7      | NA | NA | NA | NA |
| 0.34  | 0.12  | -0.19 | -0.13 | 0.029 | 0.28     | 1.10E-07 | 0.0023   | NA | NA | NA | NA |
| 0.1   | -0.04 | -0.11 | -0.07 | 0.03  | 0.23     | 2.40E-07 | 0.0024   | NA | NA | NA | NA |
| 0.46  | -0.06 | -0.03 | -0.01 | 0.03  | 0.74     | 0.71     | 1        | NA | NA | NA | NA |
| 0.05  | 0.05  | -0.07 | -0.02 | 0.03  | 0.0081   | 1.20E-05 | 0.41     | NA | NA | NA | NA |
| 0.07  | 0.14  | 0     | 0.04  | 0.031 | 7.20E-06 | 1        | 0.023    | NA | NA | NA | NA |
| 0.11  | 0.02  | -0.03 | 0.01  | 0.032 | 0.86     | 0.23     | 0.91     | NA | NA | NA | NA |
| -0.07 | 0.07  | -0.03 | -0.03 | 0.032 | 0.048    | 0.085    | 0.16     | NA | NA | NA | NA |
| -0.04 | 0.06  | -0.06 | 0.03  | 0.032 | 0.022    | 1.80E-05 | 0.053    | NA | NA | NA | NA |
| -0.13 | -0.15 | 0.03  | 0.05  | 0.033 | 0.014    | 0.51     | 0.14     | NA | NA | NA | NA |
| -0.02 | 0     | -0.03 | 0.01  | 0.033 | 0.81     | 0.018    | 0.5      | NA | NA | NA | NA |
| 0.11  | 0.12  | 0     | 0.01  | 0.039 | 0.09     | 1        | 0.69     | NA | NA | NA | NA |
| -0.03 | 0.07  | -0.04 | -0.01 | 0.039 | 3.30E-05 | 6.80E-05 | 0.38     | NA | NA | NA | NA |

|       |       |       |       |       |          |          |          |    |    |    |    |
|-------|-------|-------|-------|-------|----------|----------|----------|----|----|----|----|
| -0.1  | -0.09 | -0.08 | -0.03 | 0.04  | 0.18     | 0.21     | 0.76     | NA | NA | NA | NA |
| -0.06 | -0.02 | 0     | 0     | 0.041 | 0.7      | 1        | 0.94     | NA | NA | NA | NA |
| -0.03 | 0.07  | -0.04 | -0.05 | 0.041 | 0.0079   | 0.13     | 0.034    | NA | NA | NA | NA |
| -0.05 | 0.04  | 0.01  | 0.01  | 0.042 | 0.23     | 0.47     | 0.78     | NA | NA | NA | NA |
| -0.05 | 0.02  | -0.07 | -0.03 | 0.043 | 0.59     | 1.00E-04 | 0.079    | NA | NA | NA | NA |
| -0.1  | -0.14 | 0.03  | 0.06  | 0.044 | 0.0028   | 0.4      | 0.094    | NA | NA | NA | NA |
| -0.05 | 0.02  | -0.01 | -0.03 | 0.044 | 0.47     | 0.8      | 0.48     | NA | NA | NA | NA |
| -0.05 | 0.02  | -0.07 | 0.04  | 0.044 | 0.4      | 0.00013  | 0.13     | NA | NA | NA | NA |
| -0.04 | 0.04  | -0.04 | -0.05 | 0.045 | 0.13     | 0.092    | 0.013    | NA | NA | NA | NA |
| -0.04 | 0.02  | -0.06 | 0.04  | 0.045 | 0.65     | 0.0028   | 0.25     | NA | NA | NA | NA |
| 0.05  | 0.02  | -0.02 | 0.01  | 0.046 | 0.38     | 0.23     | 0.51     | NA | NA | NA | NA |
| -0.27 | 0.63  | -0.05 | 0     | 0.046 | 0.85     | 0.39     | 1        | NA | NA | NA | NA |
| -0.07 | -0.01 | -0.05 | -0.03 | 0.046 | 0.83     | 0.0035   | 0.17     | NA | NA | NA | NA |
| -0.09 | -0.09 | -0.01 | 0.1   | 0.047 | 0.02     | 0.56     | 5.10E-06 | NA | NA | NA | NA |
| -0.1  | -0.07 | 0     | 0.01  | 0.048 | 0.16     | 1        | 0.81     | NA | NA | NA | NA |
| -0.16 | -0.07 | 0     | 0.03  | 0.049 | 0.54     | 1        | 0.37     | NA | NA | NA | NA |
| -0.07 | -0.02 | -0.07 | -0.01 | 0.049 | 0.69     | 0.00024  | 0.48     | NA | NA | NA | NA |
| 0.06  | NA    | 0.01  | 0     | 0.049 | NA       | 0.63     | 1        | NA | NA | NA | NA |
| -0.06 | -0.05 | -0.01 | 0.03  | 0.05  | 0.19     | 0.85     | 0.046    | NA | NA | NA | NA |
| 0.13  | 0.19  | 0     | 0.16  | 0.05  | 0.0067   | 1        | 0.0054   | NA | NA | NA | NA |
| -0.04 | -0.03 | -0.03 | -0.09 | 0.05  | 0.075    | 0.27     | 1.90E-05 | NA | NA | NA | NA |
| 0.13  | 0.03  | 0.15  | 0.33  | 0.051 | 0.73     | 0.036    | 1.30E-05 | NA | NA | NA | NA |
| 0.03  | 0.1   | -0.03 | 0.01  | 0.051 | 1.30E-05 | 0.13     | 0.78     | NA | NA | NA | NA |
| -0.05 | -0.11 | -0.05 | -0.07 | 0.054 | 1.30E-05 | 0.016    | 8.10E-05 | NA | NA | NA | NA |
| -0.05 | -0.06 | -0.03 | 0     | 0.055 | 0.036    | 0.093    | 0.99     | NA | NA | NA | NA |
| -0.05 | -0.04 | -0.07 | -0.03 | 0.055 | 0.13     | 2.90E-05 | 0.054    | NA | NA | NA | NA |
| 0.03  | 0.03  | -0.07 | -0.02 | 0.061 | 0.063    | 2.70E-07 | 0.1      | NA | NA | NA | NA |
| -0.04 | -0.02 | -0.03 | 0.04  | 0.061 | 0.46     | 0.17     | 0.057    | NA | NA | NA | NA |
| -0.03 | 0.02  | -0.03 | 0     | 0.062 | 0.27     | 0.00028  | 0.65     | NA | NA | NA | NA |
| -0.07 | -0.14 | -0.06 | 0.17  | 0.063 | 0.0029   | 0.02     | 2.50E-06 | NA | NA | NA | NA |

|       |       |       |       |       |          |          |          |    |    |    |    |
|-------|-------|-------|-------|-------|----------|----------|----------|----|----|----|----|
| -0.04 | -0.03 | -0.04 | 0     | 0.064 | 0.078    | 0.0011   | 0.79     | NA | NA | NA | NA |
| -0.16 | 0.47  | -0.01 | 0     | 0.066 | 3.00E-07 | 0.86     | 1        | NA | NA | NA | NA |
| 0.09  | 0.02  | 0     | 0     | 0.068 | 0.8      | 1        | 1        | NA | NA | NA | NA |
| -0.02 | 0.05  | -0.05 | -0.01 | 0.07  | 0.0052   | 9.50E-06 | 0.67     | NA | NA | NA | NA |
| 0.22  | -0.1  | 0     | 0.08  | 0.072 | 0.18     | 1        | 0.097    | NA | NA | NA | NA |
| -0.06 | -0.08 | -0.06 | 0.04  | 0.073 | 0.01     | 0.016    | 0.16     | NA | NA | NA | NA |
| -0.03 | 0.01  | -0.05 | -0.01 | 0.078 | 0.76     | 1.70E-05 | 0.26     | NA | NA | NA | NA |
| 0.16  | 0.18  | 0.02  | 0.17  | 0.08  | 0.046    | 0.71     | 0.00037  | NA | NA | NA | NA |
| 0.1   | 0.06  | -0.1  | 0     | 0.081 | 0.35     | 0.0014   | 1        | NA | NA | NA | NA |
| -0.04 | 0.06  | -0.14 | -0.15 | 0.082 | 0.12     | 0.00028  | 4.20E-06 | NA | NA | NA | NA |
| -0.16 | -0.18 | -0.05 | 0.05  | 0.082 | 0.0014   | 0.029    | 0.1      | NA | NA | NA | NA |
| -0.09 | 0.09  | -0.06 | -0.02 | 0.082 | 0.079    | 0.0059   | 0.58     | NA | NA | NA | NA |
| 0.16  | 0     | -0.04 | 0     | 0.083 | 1        | 0.15     | 0.94     | NA | NA | NA | NA |
| 0.13  | -0.05 | 0.14  | 0.02  | 0.084 | 0.52     | 0.094    | 0.71     | NA | NA | NA | NA |
| -0.04 | -0.01 | 0     | -0.03 | 0.084 | 0.58     | 0.89     | 0.061    | NA | NA | NA | NA |
| -0.04 | 0.07  | -0.09 | -0.08 | 0.087 | 0.06     | 2.10E-09 | 5.80E-07 | NA | NA | NA | NA |
| -0.03 | 0.07  | -0.02 | -0.01 | 0.088 | 0.039    | 0.22     | 0.86     | NA | NA | NA | NA |
| -0.51 | -0.61 | 0.08  | 0.03  | 0.089 | 0.012    | 0.43     | 0.9      | NA | NA | NA | NA |
| 0.02  | 0.02  | -0.02 | 0.02  | 0.09  | 0.16     | 0.19     | 0.19     | NA | NA | NA | NA |
| -0.12 | -0.13 | -0.03 | 0.03  | 0.09  | 0.067    | 0.13     | 0.2      | NA | NA | NA | NA |
| -0.07 | 0.08  | -0.03 | 0.14  | 0.091 | 0.29     | 0.34     | 6.00E-05 | NA | NA | NA | NA |
| -0.23 | 0.04  | -0.1  | 0.04  | 0.092 | 0.91     | 0.024    | 0.54     | NA | NA | NA | NA |
| -0.06 | 0.07  | -0.01 | 0.07  | 0.094 | 0.038    | 0.44     | 0.00064  | NA | NA | NA | NA |
| 0.04  | 0.15  | -0.07 | -0.02 | 0.094 | 2.50E-08 | 7.10E-07 | 0.14     | NA | NA | NA | NA |
| 0.1   | 0.09  | -0.06 | 0     | 0.095 | 0.15     | 0.032    | 1        | NA | NA | NA | NA |
| -0.04 | -0.03 | -0.04 | 0.01  | 0.097 | 0.13     | 0.00027  | 0.46     | NA | NA | NA | NA |
| -0.22 | -0.05 | -0.08 | 0.02  | 0.097 | 0.87     | 0.0054   | 0.69     | NA | NA | NA | NA |
| -0.04 | -0.07 | -0.03 | 0.05  | 0.099 | 0.00031  | 0.11     | 0.013    | NA | NA | NA | NA |
| -0.07 | 0     | -0.03 | 0.08  | 0.1   | 1        | 0.059    | 0.00033  | NA | NA | NA | NA |
| -0.05 | -0.05 | -0.06 | -0.03 | 0.1   | 0.064    | 0.015    | 0.13     | NA | NA | NA | NA |

|       |       |       |       |      |         |          |          |    |    |    |    |
|-------|-------|-------|-------|------|---------|----------|----------|----|----|----|----|
| -0.04 | 0.01  | -0.05 | 0.01  | 0.1  | 0.92    | 0.023    | 0.6      | NA | NA | NA | NA |
| 0.15  | 0.08  | -0.01 | 0.1   | 0.11 | 0.4     | 0.83     | 0.0021   | NA | NA | NA | NA |
| -0.04 | 0.03  | -0.13 | -0.1  | 0.11 | 0.14    | 3.90E-07 | 4.00E-04 | NA | NA | NA | NA |
| -0.02 | -0.02 | -0.04 | 0.01  | 0.11 | 0.12    | 7.00E-05 | 0.6      | NA | NA | NA | NA |
| 0.08  | -0.01 | -0.05 | 0.1   | 0.11 | 1       | 0.29     | 0.06     | NA | NA | NA | NA |
| 0.11  | 0.12  | -0.04 | -0.01 | 0.11 | 0.11    | 0.28     | 1        | NA | NA | NA | NA |
| -0.04 | -0.03 | -0.08 | -0.11 | 0.11 | 0.24    | 0.013    | 0.00044  | NA | NA | NA | NA |
| -0.16 | 0.27  | -0.01 | -0.01 | 0.11 | 0.077   | 0.94     | 1        | NA | NA | NA | NA |
| -0.06 | 0.07  | -0.04 | 0.02  | 0.11 | 0.084   | 0.025    | 0.35     | NA | NA | NA | NA |
| -0.21 | -0.13 | -0.06 | 0.1   | 0.12 | 0.5     | 0.036    | 0.0029   | NA | NA | NA | NA |
| -0.02 | 0.06  | -0.03 | 0     | 0.12 | 0.00099 | 0.062    | 0.75     | NA | NA | NA | NA |
| -0.28 | -0.07 | -0.07 | -0.05 | 0.12 | 0.92    | 0.11     | 0.18     | NA | NA | NA | NA |
| 0.12  | -0.06 | -0.07 | 0.01  | 0.12 | 0.38    | 0.0016   | 0.78     | NA | NA | NA | NA |
| -0.02 | 0.02  | -0.05 | 0     | 0.12 | 0.14    | 7.10E-06 | 0.83     | NA | NA | NA | NA |
| -0.03 | -0.02 | -0.04 | 0     | 0.12 | 0.33    | 0.11     | 0.88     | NA | NA | NA | NA |
| -0.03 | 0     | -0.02 | -0.03 | 0.13 | 0.95    | 0.17     | 0.11     | NA | NA | NA | NA |
| -0.09 | 0.06  | -0.03 | 0.06  | 0.13 | 0.33    | 0.17     | 0.00097  | NA | NA | NA | NA |
| -0.02 | 0.01  | -0.04 | -0.04 | 0.13 | 0.83    | 0.2      | 0.27     | NA | NA | NA | NA |
| 0.04  | -0.04 | 0.02  | 0.02  | 0.13 | 0.017   | 0.31     | 0.41     | NA | NA | NA | NA |
| -0.11 | 0.37  | -0.14 | -0.08 | 0.13 | 0.082   | 0.00058  | 0.11     | NA | NA | NA | NA |
| -0.02 | -0.02 | -0.01 | 0.03  | 0.14 | 0.32    | 0.65     | 0.064    | NA | NA | NA | NA |
| 0.38  | -0.28 | -0.05 | -0.04 | 0.14 | 0.19    | 0.59     | 0.61     | NA | NA | NA | NA |
| 0.02  | 0.02  | -0.04 | -0.02 | 0.15 | 0.12    | 2.00E-04 | 0.097    | NA | NA | NA | NA |
| -0.06 | -0.12 | -0.07 | -0.1  | 0.15 | 0.0029  | 0.0056   | 1.40E-05 | NA | NA | NA | NA |
| -0.02 | -0.01 | -0.04 | -0.01 | 0.15 | 0.68    | 0.00061  | 0.69     | NA | NA | NA | NA |
| -0.02 | 0.03  | -0.02 | 0     | 0.15 | 0.082   | 0.21     | 0.91     | NA | NA | NA | NA |
| -0.03 | -0.03 | 0.02  | 0.06  | 0.15 | 0.3     | 0.56     | 0.019    | NA | NA | NA | NA |
| 0.09  | 0.03  | -0.03 | 0.03  | 0.15 | 0.5     | 0.024    | 0.071    | NA | NA | NA | NA |
| -0.06 | 0.07  | -0.02 | 0.06  | 0.16 | 0.2     | 0.22     | 0.004    | NA | NA | NA | NA |
| -0.02 | 0     | -0.04 | 0.01  | 0.16 | 0.98    | 0.0036   | 0.43     | NA | NA | NA | NA |

|       |       |       |       |      |        |          |          |    |    |    |    |
|-------|-------|-------|-------|------|--------|----------|----------|----|----|----|----|
| -0.12 | 0.12  | -0.01 | 0.03  | 0.16 | 0.25   | 0.76     | 0.62     | NA | NA | NA | NA |
| -0.04 | 0     | -0.02 | 0.05  | 0.17 | 0.98   | 0.24     | 0.00054  | NA | NA | NA | NA |
| 0.04  | 0.02  | -0.04 | 0.02  | 0.17 | 0.44   | 0.022    | 0.26     | NA | NA | NA | NA |
| 0.14  | -0.08 | -0.03 | -0.1  | 0.17 | 0.32   | 0.36     | 0.019    | NA | NA | NA | NA |
| 0.05  | 0.03  | -0.03 | -0.04 | 0.17 | 0.36   | 0.22     | 0.078    | NA | NA | NA | NA |
| -0.03 | 0     | -0.02 | 0.02  | 0.17 | 0.94   | 0.25     | 0.2      | NA | NA | NA | NA |
| -0.26 | 0.18  | -0.01 | 0.04  | 0.17 | 0.51   | 0.85     | 0.47     | NA | NA | NA | NA |
| -0.07 | -0.05 | 0.03  | 0.03  | 0.17 | 0.33   | 0.16     | 0.12     | NA | NA | NA | NA |
| -0.04 | 0.03  | -0.04 | -0.05 | 0.17 | 0.49   | 0.018    | 0.0092   | NA | NA | NA | NA |
| 0.1   | 0.08  | -0.03 | 0.02  | 0.17 | 0.082  | 0.47     | 0.78     | NA | NA | NA | NA |
| 0.05  | 0.1   | -0.1  | 0.02  | 0.18 | 0.038  | 9.70E-05 | 0.7      | NA | NA | NA | NA |
| 0.03  | 0.06  | -0.06 | -0.01 | 0.18 | 0.0026 | 0.0013   | 0.72     | NA | NA | NA | NA |
| -0.06 | -0.03 | -0.03 | 0.07  | 0.18 | 0.33   | 0.11     | 0.013    | NA | NA | NA | NA |
| -0.06 | -0.04 | -0.03 | 0.03  | 0.18 | 0.34   | 0.05     | 0.18     | NA | NA | NA | NA |
| -0.05 | 0.1   | 0.03  | 0.07  | 0.18 | 0.01   | 0.42     | 0.033    | NA | NA | NA | NA |
| -0.03 | 0.01  | -0.04 | 0.02  | 0.18 | 0.5    | 0.0018   | 0.29     | NA | NA | NA | NA |
| -0.04 | -0.02 | -0.06 | 0.04  | 0.19 | 0.5    | 0.00065  | 0.1      | NA | NA | NA | NA |
| -0.06 | -0.07 | -0.09 | -0.02 | 0.19 | 0.16   | 4.40E-05 | 0.42     | NA | NA | NA | NA |
| -0.02 | 0.01  | -0.04 | 0.02  | 0.19 | 0.67   | 0.00012  | 0.25     | NA | NA | NA | NA |
| 0.03  | 0.04  | -0.05 | 0.01  | 0.19 | 0.04   | 0.0015   | 0.75     | NA | NA | NA | NA |
| -0.03 | 0.02  | -0.01 | 0.01  | 0.19 | 0.51   | 0.43     | 0.58     | NA | NA | NA | NA |
| -0.08 | 0.07  | 0.02  | 0     | 0.2  | 0.43   | 0.76     | 1        | NA | NA | NA | NA |
| -0.02 | 0.02  | -0.02 | 0.02  | 0.2  | 0.13   | 0.038    | 0.092    | NA | NA | NA | NA |
| 0.07  | -0.09 | 0     | 0.04  | 0.2  | 0.0011 | 1        | 0.069    | NA | NA | NA | NA |
| -0.06 | -0.09 | -0.03 | -0.01 | 0.2  | 0.042  | 0.44     | 0.75     | NA | NA | NA | NA |
| -0.02 | 0.04  | -0.02 | 0.06  | 0.21 | 0.023  | 0.09     | 1.90E-05 | NA | NA | NA | NA |
| -0.12 | -0.16 | -0.01 | 0.06  | 0.21 | 0.028  | 0.69     | 0.017    | NA | NA | NA | NA |
| -0.06 | 0.17  | -0.04 | 0.04  | 0.21 | 0.0068 | 0.16     | 0.21     | NA | NA | NA | NA |
| 0.14  | -0.07 | -0.05 | 0.11  | 0.21 | 0.52   | 0.26     | 0.015    | NA | NA | NA | NA |
| 0.05  | 0.07  | -0.02 | 0.06  | 0.21 | 0.069  | 0.14     | 0.00018  | NA | NA | NA | NA |



|       |       |       |       |      |         |          |          |    |    |    |    |
|-------|-------|-------|-------|------|---------|----------|----------|----|----|----|----|
| 0.06  | 0     | -0.04 | 0.12  | 0.21 | 1       | 0.027    | 4.10E-05 | NA | NA | NA | NA |
| 0.04  | 0.11  | -0.02 | 0.02  | 0.22 | 0.00049 | 0.41     | 0.69     | NA | NA | NA | NA |
| -0.1  | -0.09 | -0.09 | -0.05 | 0.22 | 0.29    | 0.00055  | 0.19     | NA | NA | NA | NA |
| -0.37 | 0.04  | -0.08 | 0.05  | 0.22 | 1       | 0.11     | 0.41     | NA | NA | NA | NA |
| 0.03  | 0.01  | -0.06 | -0.06 | 0.23 | 0.61    | 0.02     | 0.035    | NA | NA | NA | NA |
| 0.33  | 0.17  | 0.02  | 0.2   | 0.23 | 1       | 0.72     | 0.0011   | NA | NA | NA | NA |
| 0.03  | 0.07  | -0.01 | 0.05  | 0.23 | 0.03    | 0.75     | 0.0092   | NA | NA | NA | NA |
| -0.04 | -0.04 | -0.06 | -0.1  | 0.23 | 0.21    | 0.0054   | 2.00E-04 | NA | NA | NA | NA |
| -0.08 | -0.09 | 0.03  | 0.1   | 0.23 | 0.13    | 0.5      | 0.006    | NA | NA | NA | NA |
| -0.12 | -0.05 | 0.04  | 0.13  | 0.23 | 0.88    | 0.066    | 1.20E-06 | NA | NA | NA | NA |
| -0.02 | -0.01 | 0     | 0.03  | 0.23 | 0.41    | 0.85     | 0.00079  | NA | NA | NA | NA |
| -0.07 | 0.05  | -0.05 | 0     | 0.23 | 0.44    | 0.056    | 1        | NA | NA | NA | NA |
| -0.09 | 0     | 0.01  | 0.09  | 0.24 | 1       | 0.71     | 0.00047  | NA | NA | NA | NA |
| 0.02  | -0.02 | 0     | 0.03  | 0.25 | 0.26    | 0.77     | 0.057    | NA | NA | NA | NA |
| -0.02 | 0.02  | -0.02 | 0.05  | 0.25 | 0.47    | 0.22     | 0.0011   | NA | NA | NA | NA |
| -0.04 | 0.03  | 0.01  | 0.1   | 0.25 | 0.58    | 0.71     | 0.00017  | NA | NA | NA | NA |
| 0.02  | -0.01 | 0     | 0.02  | 0.26 | 0.79    | 0.87     | 0.4      | NA | NA | NA | NA |
| 0.04  | 0.19  | -0.07 | -0.01 | 0.26 | 0.00026 | 0.071    | 0.97     | NA | NA | NA | NA |
| -0.06 | -0.05 | -0.1  | -0.03 | 0.26 | 0.33    | 0.0092   | 0.57     | NA | NA | NA | NA |
| 0.11  | 0.08  | -0.04 | 0.22  | 0.27 | 0.19    | 0.7      | 0.062    | NA | NA | NA | NA |
| 0.39  | NA    | -0.04 | 0.11  | 0.27 | NA      | 0.66     | 0.14     | NA | NA | NA | NA |
| -0.02 | 0.01  | -0.03 | 0.02  | 0.27 | 0.66    | 0.026    | 0.22     | NA | NA | NA | NA |
| -0.06 | 0.1   | 0.01  | 0.05  | 0.27 | 0.092   | 0.78     | 0.054    | NA | NA | NA | NA |
| -0.03 | -0.04 | -0.07 | -0.01 | 0.27 | 0.096   | 2.20E-06 | 0.41     | NA | NA | NA | NA |
| -0.05 | -0.01 | -0.04 | -0.01 | 0.27 | 1       | 0.096    | 0.88     | NA | NA | NA | NA |
| -0.05 | 0.18  | -0.03 | 0     | 0.28 | 0.0015  | 0.15     | 1        | NA | NA | NA | NA |
| -0.03 | 0.07  | -0.05 | 0.02  | 0.28 | 0.049   | 0.0021   | 0.51     | NA | NA | NA | NA |
| -0.03 | 0.09  | -0.09 | -0.05 | 0.28 | 0.0048  | 1.80E-07 | 0.024    | NA | NA | NA | NA |
| 0.03  | 0.05  | -0.02 | 0.02  | 0.28 | 0.1     | 0.62     | 0.56     | NA | NA | NA | NA |
| -0.08 | 0.05  | 0     | 0.02  | 0.28 | 0.78    | 1        | 0.77     | NA | NA | NA | NA |

|       |       |       |       |      |          |          |          |    |    |    |    |
|-------|-------|-------|-------|------|----------|----------|----------|----|----|----|----|
| 0.15  | -0.1  | -0.02 | 0.11  | 0.28 | 0.18     | 0.64     | 0.015    | NA | NA | NA | NA |
| 0.02  | 0.08  | -0.07 | 0.01  | 0.28 | 6.00E-05 | 1.80E-07 | 0.57     | NA | NA | NA | NA |
| -0.02 | 0.01  | -0.06 | -0.04 | 0.28 | 0.91     | 0.022    | 0.18     | NA | NA | NA | NA |
| -0.04 | 0.09  | -0.04 | 0.03  | 0.28 | 0.052    | 0.2      | 0.48     | NA | NA | NA | NA |
| -0.06 | -0.04 | -0.03 | 0     | 0.29 | 0.62     | 0.16     | 1        | NA | NA | NA | NA |
| 0.03  | 0.01  | -0.03 | 0.08  | 0.29 | 0.58     | 0.1      | 3.50E-06 | NA | NA | NA | NA |
| -0.1  | -0.13 | -0.04 | 0.04  | 0.29 | 0.23     | 0.16     | 0.38     | NA | NA | NA | NA |
| 0.05  | 0.23  | -0.08 | -0.03 | 0.29 | 5.30E-05 | 0.00085  | 0.44     | NA | NA | NA | NA |
| -0.13 | 0.24  | -0.09 | NA    | 0.3  | 0.044    | 0.59     | NA       | NA | NA | NA | NA |
| -0.04 | 0.01  | -0.06 | 0.03  | 0.3  | 0.91     | 0.0036   | 0.15     | NA | NA | NA | NA |
| -0.02 | -0.01 | -0.03 | 0.03  | 0.3  | 0.39     | 0.012    | 0.05     | NA | NA | NA | NA |
| -0.04 | -0.02 | 0.02  | 0.11  | 0.31 | 0.57     | 0.45     | 8.70E-06 | NA | NA | NA | NA |
| -0.02 | 0     | -0.03 | 0.04  | 0.31 | 0.97     | 0.049    | 0.036    | NA | NA | NA | NA |
| -0.04 | -0.04 | -0.05 | 0.01  | 0.31 | 0.097    | 0.0021   | 0.71     | NA | NA | NA | NA |
| 0.06  | 0.02  | -0.02 | -0.02 | 0.32 | 0.65     | 0.36     | 0.39     | NA | NA | NA | NA |
| -0.01 | 0     | -0.01 | 0.02  | 0.32 | 0.8      | 0.4      | 0.082    | NA | NA | NA | NA |
| -0.06 | -0.01 | -0.01 | 0.14  | 0.32 | 0.96     | 0.75     | 0.00021  | NA | NA | NA | NA |
| -0.06 | 0.26  | -0.03 | 0.09  | 0.32 | 0.0016   | 0.17     | 0.00016  | NA | NA | NA | NA |
| 0.05  | -0.06 | -0.1  | -0.05 | 0.32 | 0.16     | 3.10E-05 | 0.071    | NA | NA | NA | NA |
| -0.02 | 0.02  | -0.05 | -0.01 | 0.33 | 0.24     | 1.20E-06 | 0.68     | NA | NA | NA | NA |
| -0.04 | -0.07 | -0.17 | -0.11 | 0.33 | 0.08     | 6.50E-07 | 0.0015   | NA | NA | NA | NA |
| -0.04 | -0.07 | -0.03 | 0.01  | 0.33 | 0.063    | 0.25     | 0.85     | NA | NA | NA | NA |
| -0.02 | 0     | -0.02 | -0.01 | 0.34 | 0.9      | 0.12     | 0.67     | NA | NA | NA | NA |
| -0.03 | -0.03 | -0.1  | -0.04 | 0.34 | 0.33     | 2.30E-05 | 0.13     | NA | NA | NA | NA |
| -0.04 | -0.03 | 0.04  | 0.01  | 0.35 | 0.16     | 0.025    | 0.71     | NA | NA | NA | NA |
| -0.15 | 0.36  | -0.14 | 0.42  | 0.35 | 0.031    | 3.00E-04 | 0.001    | NA | NA | NA | NA |
| 0.03  | 0.07  | -0.04 | 0.02  | 0.35 | 0.033    | 0.0023   | 0.31     | NA | NA | NA | NA |
| -0.04 | 0.24  | 0.05  | 0.08  | 0.35 | 0.021    | 0.065    | 0.0019   | NA | NA | NA | NA |
| 0.09  | 0.01  | -0.05 | -0.07 | 0.35 | 0.85     | 0.074    | 0.0016   | NA | NA | NA | NA |
| -0.02 | -0.01 | -0.05 | 0.01  | 0.36 | 1        | 0.011    | 0.85     | NA | NA | NA | NA |

|       |       |       |       |      |          |          |        |    |    |    |    |
|-------|-------|-------|-------|------|----------|----------|--------|----|----|----|----|
| -0.06 | -0.16 | -0.01 | -0.05 | 0.36 | 0.00023  | 0.72     | 0.098  | NA | NA | NA | NA |
| 0.11  | 0.06  | -0.02 | -0.02 | 0.36 | 0.57     | 0.84     | 0.76   | NA | NA | NA | NA |
| -0.1  | -0.24 | -0.08 | -0.1  | 0.36 | 0.0016   | 0.097    | 0.025  | NA | NA | NA | NA |
| -0.02 | 0.05  | -0.08 | 0.01  | 0.37 | 0.082    | 2.70E-05 | 0.69   | NA | NA | NA | NA |
| -0.03 | 0.01  | -0.07 | -0.01 | 0.37 | 0.92     | 7.90E-07 | 0.63   | NA | NA | NA | NA |
| -0.02 | 0.01  | -0.05 | 0.02  | 0.37 | 0.44     | 8.70E-06 | 0.24   | NA | NA | NA | NA |
| 0.02  | 0.07  | -0.05 | -0.04 | 0.37 | 0.00028  | 0.0018   | 0.0025 | NA | NA | NA | NA |
| 0.02  | 0.13  | -0.07 | -0.01 | 0.37 | 2.10E-08 | 0.00026  | 0.7    | NA | NA | NA | NA |
| -0.02 | 0.05  | -0.06 | -0.04 | 0.37 | 0.017    | 0.00011  | 0.025  | NA | NA | NA | NA |
| -0.03 | 0.01  | -0.04 | -0.03 | 0.37 | 0.91     | 0.12     | 0.28   | NA | NA | NA | NA |
| -0.02 | 0.05  | -0.04 | 0.09  | 0.37 | 0.088    | 0.18     | 0.023  | NA | NA | NA | NA |
| 0.06  | 0.14  | -0.02 | 0.1   | 0.37 | 0.016    | 0.56     | 0.0065 | NA | NA | NA | NA |
| 0.02  | -0.02 | 0     | 0.02  | 0.38 | 0.47     | 0.94     | 0.09   | NA | NA | NA | NA |
| 0.02  | 0     | -0.04 | -0.01 | 0.38 | 0.96     | 0.0064   | 0.5    | NA | NA | NA | NA |
| 0.04  | 0.12  | -0.09 | 0.13  | 0.38 | 0.12     | 0.041    | 0.019  | NA | NA | NA | NA |
| -0.04 | -0.07 | -0.03 | -0.02 | 0.38 | 0.0065   | 0.095    | 0.14   | NA | NA | NA | NA |
| -0.02 | -0.01 | -0.04 | 0.01  | 0.38 | 0.81     | 0.041    | 0.51   | NA | NA | NA | NA |
| -0.03 | -0.03 | -0.04 | 0.05  | 0.38 | 0.3      | 0.098    | 0.095  | NA | NA | NA | NA |
| -0.05 | 0.05  | -0.07 | -0.05 | 0.39 | 0.14     | 3.00E-04 | 0.024  | NA | NA | NA | NA |
| -0.03 | -0.02 | -0.02 | 0     | 0.39 | 0.53     | 0.19     | 1      | NA | NA | NA | NA |
| 0.07  | -0.09 | 0     | 0.12  | 0.39 | 0.64     | 0.97     | 0.12   | NA | NA | NA | NA |
| -0.03 | 0.24  | -0.06 | 0.04  | 0.39 | 1.80E-05 | 0.073    | 0.46   | NA | NA | NA | NA |
| -0.02 | 0     | 0.01  | 0.07  | 0.39 | 1        | 0.9      | 0.0056 | NA | NA | NA | NA |
| -0.03 | 0     | -0.05 | 0.01  | 0.39 | 1        | 0.0011   | 0.69   | NA | NA | NA | NA |
| -0.03 | -0.06 | -0.06 | -0.01 | 0.39 | 0.08     | 0.028    | 0.7    | NA | NA | NA | NA |
| 0.02  | 0     | 0.05  | 0.06  | 0.4  | 1        | 0.13     | 0.037  | NA | NA | NA | NA |
| -0.08 | -0.03 | -0.08 | 0.07  | 0.4  | 0.67     | 0.032    | 0.17   | NA | NA | NA | NA |
| 0.03  | 0.07  | -0.01 | 0     | 0.41 | 0.013    | 0.65     | 0.88   | NA | NA | NA | NA |
| 0.02  | 0.03  | 0.05  | -0.05 | 0.41 | 0.25     | 0.1      | 0.034  | NA | NA | NA | NA |
| 0.05  | 0.04  | -0.06 | 0.02  | 0.41 | 0.47     | 0.0087   | 0.58   | NA | NA | NA | NA |

|       |       |       |       |      |          |          |          |    |    |    |    |
|-------|-------|-------|-------|------|----------|----------|----------|----|----|----|----|
| 0.02  | 0.03  | 0     | 0.06  | 0.41 | 0.22     | 0.83     | 3.60E-05 | NA | NA | NA | NA |
| 0.03  | 0.1   | 0.13  | 0.05  | 0.42 | 0.1      | 0.00079  | 0.11     | NA | NA | NA | NA |
| -0.02 | -0.02 | -0.04 | 0.03  | 0.43 | 0.33     | 0.00079  | 0.051    | NA | NA | NA | NA |
| 0.11  | 0.03  | -0.02 | -0.05 | 0.43 | 1        | 0.43     | 0.26     | NA | NA | NA | NA |
| -0.07 | -0.05 | -0.12 | -0.11 | 0.43 | 0.65     | 1.50E-08 | 2.80E-06 | NA | NA | NA | NA |
| -0.06 | -0.1  | -0.05 | 0.08  | 0.43 | 0.11     | 0.049    | 0.023    | NA | NA | NA | NA |
| -0.02 | -0.01 | -0.02 | 0     | 0.44 | 0.76     | 0.64     | 1        | NA | NA | NA | NA |
| 0.03  | 0     | -0.04 | 0.08  | 0.44 | 1        | 0.28     | 0.072    | NA | NA | NA | NA |
| -0.07 | 0.02  | 0.01  | -0.14 | 0.44 | 1        | 0.92     | 0.00041  | NA | NA | NA | NA |
| -0.02 | 0     | 0     | 0.04  | 0.45 | 1        | 0.98     | 0.011    | NA | NA | NA | NA |
| 0.05  | 0.06  | -0.04 | 0.07  | 0.45 | 0.24     | 0.33     | 0.087    | NA | NA | NA | NA |
| 0.04  | -0.07 | -0.03 | 0.05  | 0.45 | 0.0021   | 0.1      | 0.11     | NA | NA | NA | NA |
| 0.02  | 0.03  | -0.02 | 0     | 0.45 | 0.25     | 0.25     | 1        | NA | NA | NA | NA |
| 0.01  | 0     | -0.02 | -0.02 | 0.46 | 0.79     | 0.33     | 0.19     | NA | NA | NA | NA |
| -0.12 | 0.64  | -0.08 | 0.09  | 0.46 | 0.0023   | 0.13     | 0.31     | NA | NA | NA | NA |
| 0.04  | 0.25  | -0.04 | 0.02  | 0.46 | 0.01     | 0.21     | 0.62     | NA | NA | NA | NA |
| -0.09 | 0.06  | 0.04  | 0.01  | 0.46 | 0.85     | 0.31     | 0.91     | NA | NA | NA | NA |
| -0.04 | -0.05 | -0.04 | 0.01  | 0.47 | 0.27     | 4.20E-05 | 0.48     | NA | NA | NA | NA |
| -0.06 | 0.04  | -0.03 | 0.01  | 0.47 | 0.87     | 0.35     | 0.86     | NA | NA | NA | NA |
| -0.01 | 0.01  | -0.1  | 0     | 0.47 | 0.43     | 3.60E-07 | 1        | NA | NA | NA | NA |
| 0.05  | 0.03  | -0.1  | 0.09  | 0.47 | 0.77     | 0.039    | 0.25     | NA | NA | NA | NA |
| 0.04  | 0     | -0.09 | 0.13  | 0.47 | 1        | 9.70E-06 | 2.70E-08 | NA | NA | NA | NA |
| 0.03  | 0     | -0.03 | -0.03 | 0.48 | 1        | 0.11     | 0.11     | NA | NA | NA | NA |
| 0.25  | 0.46  | 0.19  | 0.2   | 0.49 | 0.035    | 0.042    | 0.032    | NA | NA | NA | NA |
| 0.01  | 0.07  | -0.01 | 0.01  | 0.49 | 1.70E-05 | 0.2      | 0.48     | NA | NA | NA | NA |
| -0.02 | -0.03 | -0.05 | 0     | 0.5  | 0.18     | 0.00016  | 0.94     | NA | NA | NA | NA |
| -0.17 | -0.08 | -0.06 | -0.01 | 0.5  | 0.92     | 0.49     | 0.98     | NA | NA | NA | NA |
| 0.05  | 0     | 0.02  | 0.07  | 0.5  | 1        | 0.65     | 0.061    | NA | NA | NA | NA |
| -0.02 | 0.08  | 0.02  | 0.09  | 0.5  | 0.15     | 0.43     | 0.00022  | NA | NA | NA | NA |
| -0.02 | 0     | -0.06 | -0.04 | 0.5  | 1        | 0.00047  | 0.064    | NA | NA | NA | NA |

|       |       |       |       |      |          |         |          |    |    |    |    |
|-------|-------|-------|-------|------|----------|---------|----------|----|----|----|----|
| 0.13  | 0.04  | -0.04 | 0     | 0.52 | 1        | 0.045   | 0.91     | NA | NA | NA | NA |
| 0.02  | -0.03 | -0.02 | 0.01  | 0.52 | 0.035    | 0.58    | 0.61     | NA | NA | NA | NA |
| 0.03  | -0.05 | -0.04 | 0.11  | 0.52 | 0.27     | 0.028   | 1.90E-07 | NA | NA | NA | NA |
| -0.02 | -0.01 | -0.02 | -0.01 | 0.52 | 0.75     | 0.27    | 0.69     | NA | NA | NA | NA |
| 0.14  | 0.15  | 0.23  | 0.07  | 0.53 | 0.43     | 0.0011  | 0.017    | NA | NA | NA | NA |
| -0.02 | 0     | 0.02  | 0.04  | 0.53 | 0.96     | 0.58    | 0.083    | NA | NA | NA | NA |
| 0.12  | 0.19  | -0.17 | 0     | 0.54 | 0.19     | 0.035   | 1        | NA | NA | NA | NA |
| 0.17  | -0.04 | NA    | NA    | 0.54 | 1        | NA      | NA       | NA | NA | NA | NA |
| -0.02 | -0.01 | -0.04 | -0.01 | 0.55 | 0.84     | 0.072   | 0.66     | NA | NA | NA | NA |
| -0.02 | 0.02  | 0     | 0.03  | 0.55 | 0.71     | 0.85    | 0.043    | NA | NA | NA | NA |
| 0.06  | 0.01  | -0.07 | 0.08  | 0.56 | 1        | 0.08    | 0.12     | NA | NA | NA | NA |
| 0.02  | 0.2   | -0.04 | 0.04  | 0.56 | 5.50E-07 | 0.098   | 0.11     | NA | NA | NA | NA |
| 0.03  | 0.02  | 0.04  | 0.15  | 0.58 | 0.62     | 0.18    | 8.60E-05 | NA | NA | NA | NA |
| -0.02 | 0.01  | 0     | 0.02  | 0.58 | 0.96     | 0.97    | 0.4      | NA | NA | NA | NA |
| -0.03 | 0.02  | 0.04  | 0.02  | 0.59 | 0.64     | 0.33    | 0.64     | NA | NA | NA | NA |
| -0.03 | 0.02  | -0.08 | -0.08 | 0.59 | 0.76     | 0.0052  | 0.072    | NA | NA | NA | NA |
| 0.04  | 0.14  | -0.08 | 0.02  | 0.59 | 0.051    | 0.0034  | 0.8      | NA | NA | NA | NA |
| 0.02  | 0.06  | -0.03 | -0.06 | 0.59 | 0.12     | 0.37    | 0.021    | NA | NA | NA | NA |
| 0.24  | 0.67  | 0.01  | 0.26  | 0.59 | 0.32     | 1       | 0.0019   | NA | NA | NA | NA |
| -0.03 | 0.08  | -0.03 | 0.02  | 0.6  | 0.22     | 0.33    | 0.61     | NA | NA | NA | NA |
| -0.01 | -0.01 | -0.02 | 0.02  | 0.61 | 0.81     | 0.4     | 0.35     | NA | NA | NA | NA |
| 0.04  | -0.04 | -0.02 | 0.1   | 0.61 | 0.47     | 0.32    | 0.00047  | NA | NA | NA | NA |
| 0.03  | -0.03 | -0.04 | 0.07  | 0.61 | 0.35     | 0.11    | 0.032    | NA | NA | NA | NA |
| 0.05  | -0.03 | -0.01 | 0.07  | 0.62 | 0.84     | 0.65    | 0.013    | NA | NA | NA | NA |
| -0.06 | -0.11 | 0     | 0.02  | 0.62 | 0.18     | 1       | 0.48     | NA | NA | NA | NA |
| -0.03 | -0.01 | -0.05 | -0.01 | 0.62 | 0.89     | 0.019   | 0.8      | NA | NA | NA | NA |
| -0.02 | 0.01  | -0.08 | -0.01 | 0.62 | 1        | 0.018   | 0.85     | NA | NA | NA | NA |
| -0.01 | 0.03  | -0.02 | 0.04  | 0.62 | 0.21     | 0.19    | 0.025    | NA | NA | NA | NA |
| 0.75  | 0.25  | -0.07 | 0.06  | 0.62 | 1        | 0.028   | 0.51     | NA | NA | NA | NA |
| -0.01 | 0.01  | -0.05 | 0     | 0.63 | 0.65     | 0.00053 | 0.85     | NA | NA | NA | NA |

|       |       |       |       |      |        |         |        |    |    |    |    |
|-------|-------|-------|-------|------|--------|---------|--------|----|----|----|----|
| -0.03 | 0.04  | -0.05 | 0.07  | 0.63 | 0.57   | 0.014   | 0.0025 | NA | NA | NA | NA |
| -0.01 | 0.03  | -0.04 | -0.02 | 0.63 | 0.18   | 0.021   | 0.48   | NA | NA | NA | NA |
| -0.03 | 0.08  | -0.04 | 0     | 0.63 | 0.013  | 0.12    | 1      | NA | NA | NA | NA |
| -0.02 | 0.02  | 0     | 0.04  | 0.63 | 0.53   | 1       | 0.17   | NA | NA | NA | NA |
| 0.04  | 0.01  | -0.08 | -0.02 | 0.64 | 1      | 0.00024 | 0.61   | NA | NA | NA | NA |
| -0.03 | -0.04 | 0     | 0.01  | 0.64 | 0.5    | 0.96    | 0.75   | NA | NA | NA | NA |
| -0.02 | 0.03  | -0.03 | 0.02  | 0.64 | 0.47   | 0.15    | 0.42   | NA | NA | NA | NA |
| -0.03 | 0.04  | -0.09 | -0.01 | 0.65 | 0.9    | 0.022   | 0.98   | NA | NA | NA | NA |
| 0.03  | 0.09  | -0.02 | 0.04  | 0.65 | 0.066  | 0.16    | 0.047  | NA | NA | NA | NA |
| -0.02 | -0.04 | -0.08 | 0.06  | 0.65 | 0.4    | 0.00087 | 0.074  | NA | NA | NA | NA |
| -0.02 | -0.02 | 0.02  | 0.04  | 0.65 | 0.59   | 0.48    | 0.08   | NA | NA | NA | NA |
| -0.02 | 0.01  | -0.13 | -0.07 | 0.65 | 0.76   | 0.017   | 0.41   | NA | NA | NA | NA |
| -0.01 | 0.07  | -0.06 | 0     | 0.66 | 0.025  | 0.00067 | 0.94   | NA | NA | NA | NA |
| 0.1   | 0.07  | 0     | 0.1   | 0.66 | 1      | 1       | 0.77   | NA | NA | NA | NA |
| -0.06 | -0.2  | 0.07  | 0.04  | 0.66 | 0.0075 | 0.0087  | 0.063  | NA | NA | NA | NA |
| 0.72  | -0.11 | 0.02  | 0.02  | 0.66 | 0.73   | 0.67    | 0.68   | NA | NA | NA | NA |
| 0.02  | 0     | -0.05 | -0.01 | 0.66 | 1      | 0.081   | 0.68   | NA | NA | NA | NA |
| 0.06  | 0.07  | -0.12 | -0.08 | 0.68 | 0.58   | 0.00074 | 0.089  | NA | NA | NA | NA |
| 0.1   | -0.12 | -0.05 | 0.03  | 0.68 | 0.25   | 0.028   | 0.53   | NA | NA | NA | NA |
| -0.01 | 0.05  | -0.04 | -0.03 | 0.68 | 0.081  | 0.049   | 0.21   | NA | NA | NA | NA |
| -0.01 | 0     | -0.07 | -0.02 | 0.69 | 0.85   | 0.00011 | 0.22   | NA | NA | NA | NA |
| -0.09 | -0.08 | -0.17 | -0.05 | 0.69 | 0.37   | 0.00024 | 0.37   | NA | NA | NA | NA |
| -0.02 | 0.07  | -0.04 | -0.03 | 0.69 | 0.024  | 0.093   | 0.19   | NA | NA | NA | NA |
| -0.21 | -0.22 | NA    | NA    | 0.69 | 0.061  | NA      | NA     | NA | NA | NA | NA |
| -0.01 | 0.03  | -0.04 | -0.03 | 0.69 | 0.16   | 0.004   | 0.04   | NA | NA | NA | NA |
| -0.02 | -0.03 | -0.06 | -0.01 | 0.69 | 0.34   | 0.023   | 0.74   | NA | NA | NA | NA |
| -0.04 | -0.02 | -0.08 | -0.07 | 0.69 | 1      | 0.0037  | 0.051  | NA | NA | NA | NA |
| -0.05 | 0.06  | -0.02 | 0     | 0.7  | 1      | 0.89    | 1      | NA | NA | NA | NA |
| -0.03 | -0.05 | -0.05 | -0.07 | 0.7  | 0.3    | 0.064   | 0.016  | NA | NA | NA | NA |
| -0.02 | 0.01  | -0.03 | 0.01  | 0.7  | 0.97   | 0.067   | 0.76   | NA | NA | NA | NA |

|       |       |       |       |      |          |          |          |    |    |    |    |
|-------|-------|-------|-------|------|----------|----------|----------|----|----|----|----|
| 0.01  | 0     | -0.08 | -0.09 | 0.7  | 0.98     | 4.70E-07 | 2.40E-07 | NA | NA | NA | NA |
| 0.01  | 0     | -0.03 | 0.01  | 0.7  | 0.91     | 0.025    | 0.74     | NA | NA | NA | NA |
| 0.01  | -0.03 | -0.08 | 0.01  | 0.71 | 0.43     | 0.00025  | 0.92     | NA | NA | NA | NA |
| -0.01 | 0.02  | -0.06 | -0.02 | 0.71 | 0.38     | 2.00E-05 | 0.12     | NA | NA | NA | NA |
| -0.02 | 0.09  | -0.01 | 0.02  | 0.71 | 0.084    | 0.79     | 0.43     | NA | NA | NA | NA |
| 0.01  | 0.03  | -0.02 | 0.01  | 0.72 | 0.22     | 0.47     | 0.62     | NA | NA | NA | NA |
| -0.02 | -0.04 | -0.03 | -0.01 | 0.72 | 0.26     | 0.36     | 0.75     | NA | NA | NA | NA |
| -0.13 | -0.08 | -0.27 | NA    | 0.72 | 0.35     | 0.00012  | NA       | NA | NA | NA | NA |
| 0     | 0.02  | -0.03 | 0.03  | 0.72 | 0.067    | 0.016    | 0.032    | NA | NA | NA | NA |
| -0.07 | 0     | -0.06 | 0.06  | 0.73 | 1        | 0.074    | 0.11     | NA | NA | NA | NA |
| 0.01  | -0.03 | 0.02  | 0.05  | 0.73 | 0.5      | 0.4      | 0.014    | NA | NA | NA | NA |
| 0.02  | -0.04 | -0.04 | -0.01 | 0.73 | 0.33     | 0.038    | 0.48     | NA | NA | NA | NA |
| -0.01 | 0.04  | -0.04 | -0.01 | 0.73 | 0.024    | 0.0058   | 0.36     | NA | NA | NA | NA |
| -0.01 | -0.02 | -0.03 | -0.02 | 0.73 | 0.62     | 0.19     | 0.49     | NA | NA | NA | NA |
| 0.04  | 0.02  | -0.01 | 0.04  | 0.74 | 0.69     | 0.94     | 0.24     | NA | NA | NA | NA |
| 0.01  | 0.02  | -0.01 | 0.04  | 0.74 | 0.55     | 0.65     | 0.047    | NA | NA | NA | NA |
| 0.01  | 0.01  | -0.05 | 0.08  | 0.74 | 0.78     | 6.00E-04 | 0.0012   | NA | NA | NA | NA |
| -0.02 | 0.02  | -0.09 | -0.08 | 0.74 | 0.87     | 0.022    | 0.048    | NA | NA | NA | NA |
| 0.05  | 0.16  | -0.16 | -0.08 | 0.75 | 0.2      | 1.90E-08 | 0.031    | NA | NA | NA | NA |
| 0.01  | -0.03 | 0     | 0.01  | 0.75 | 0.21     | 0.85     | 0.54     | NA | NA | NA | NA |
| 0.01  | 0.03  | -0.02 | 0.01  | 0.75 | 0.34     | 0.17     | 0.62     | NA | NA | NA | NA |
| -0.02 | -0.01 | -0.16 | -0.14 | 0.76 | 0.79     | 6.90E-06 | 0.00027  | NA | NA | NA | NA |
| 0.01  | 0.02  | -0.05 | -0.04 | 0.76 | 0.33     | 0.00028  | 0.0033   | NA | NA | NA | NA |
| -0.06 | NA    | 0.05  | 0.04  | 0.76 | NA       | 0.3      | 0.49     | NA | NA | NA | NA |
| 0.03  | 0.19  | -0.09 | -0.02 | 0.76 | 7.00E-05 | 5.80E-05 | 0.68     | NA | NA | NA | NA |
| -0.01 | -0.01 | -0.06 | 0.05  | 0.77 | 0.85     | 0.0027   | 0.091    | NA | NA | NA | NA |
| -0.03 | -0.01 | -0.01 | 0.01  | 0.77 | 1        | 0.47     | 0.67     | NA | NA | NA | NA |
| 0.01  | 0.03  | -0.03 | 0.03  | 0.77 | 0.21     | 0.01     | 0.011    | NA | NA | NA | NA |
| -0.05 | -0.05 | -0.28 | -0.3  | 0.77 | 0.75     | 1.40E-07 | 7.10E-06 | NA | NA | NA | NA |
| -0.06 | 0.11  | -0.09 | 0.03  | 0.77 | 0.25     | 0.0078   | 0.46     | NA | NA | NA | NA |

|       |       |       |       |      |         |          |         |    |    |    |    |
|-------|-------|-------|-------|------|---------|----------|---------|----|----|----|----|
| 0     | 0.01  | -0.05 | 0.03  | 0.77 | 0.31    | 7.00E-06 | 0.018   | NA | NA | NA | NA |
| -0.03 | 0.16  | -0.09 | -0.04 | 0.77 | 0.036   | 0.0016   | 0.17    | NA | NA | NA | NA |
| -0.02 | 0.15  | -0.09 | -0.08 | 0.78 | 0.18    | 0.0015   | 0.042   | NA | NA | NA | NA |
| 0.08  | 0.1   | -0.09 | -0.06 | 0.78 | 0.44    | 0.087    | 0.33    | NA | NA | NA | NA |
| -0.02 | 0.16  | 0.06  | 0     | 0.78 | 0.0023  | 0.026    | 1       | NA | NA | NA | NA |
| 0.04  | -0.05 | -0.09 | 0.01  | 0.79 | 0.49    | 0.031    | 0.93    | NA | NA | NA | NA |
| -0.02 | 0.25  | -0.04 | 0.04  | 0.79 | 0.00014 | 0.084    | 0.19    | NA | NA | NA | NA |
| -0.01 | -0.01 | -0.05 | 0     | 0.79 | 0.61    | 3.10E-05 | 1       | NA | NA | NA | NA |
| 0.01  | 0.02  | -0.07 | 0     | 0.79 | 0.55    | 6.40E-05 | 1       | NA | NA | NA | NA |
| -0.02 | 0.02  | -0.01 | 0.09  | 0.8  | 0.69    | 0.85     | 0.0036  | NA | NA | NA | NA |
| -0.01 | 0     | -0.02 | 0.02  | 0.8  | 1       | 0.13     | 0.21    | NA | NA | NA | NA |
| -0.01 | 0     | -0.06 | -0.02 | 0.81 | 1       | 4.20E-05 | 0.23    | NA | NA | NA | NA |
| -0.02 | -0.07 | -0.11 | 0     | 0.81 | 0.023   | 2.00E-06 | 1       | NA | NA | NA | NA |
| 0.01  | 0.06  | -0.07 | -0.04 | 0.81 | 0.12    | 0.0062   | 0.18    | NA | NA | NA | NA |
| 0.02  | 0.02  | -0.02 | 0.09  | 0.82 | 0.95    | 0.32     | 0.00017 | NA | NA | NA | NA |
| -0.5  | NA    | -0.1  | NA    | 0.82 | NA      | 1        | NA      | NA | NA | NA | NA |
| 0.03  | -0.05 | -0.14 | 0.09  | 0.82 | 0.63    | 0.002    | 0.19    | NA | NA | NA | NA |
| -0.01 | -0.04 | 0     | 0.08  | 0.83 | 0.066   | 1        | 0.00012 | NA | NA | NA | NA |
| -0.02 | -0.01 | -0.06 | -0.03 | 0.83 | 0.82    | 0.00013  | 0.082   | NA | NA | NA | NA |
| -0.02 | -0.06 | -0.08 | -0.01 | 0.83 | 0.23    | 0.011    | 0.78    | NA | NA | NA | NA |
| -0.01 | -0.01 | -0.11 | -0.07 | 0.83 | 1       | 3.00E-05 | 0.0089  | NA | NA | NA | NA |
| 0.02  | 0.05  | -0.24 | -0.18 | 0.83 | 0.35    | 1.20E-08 | 0.00045 | NA | NA | NA | NA |
| -0.03 | -0.1  | -0.04 | -0.03 | 0.84 | 0.015   | 0.027    | 0.13    | NA | NA | NA | NA |
| -0.01 | -0.01 | -0.05 | 0.02  | 0.84 | 0.84    | 0.0011   | 0.21    | NA | NA | NA | NA |
| -0.01 | 0.02  | -0.09 | -0.01 | 0.84 | 0.54    | 0.0016   | 0.78    | NA | NA | NA | NA |
| -0.03 | 0.07  | -0.11 | -0.07 | 0.84 | 0.48    | 0.0087   | 0.19    | NA | NA | NA | NA |
| 0     | -0.01 | -0.05 | 0     | 0.84 | 0.52    | 4.90E-08 | 0.72    | NA | NA | NA | NA |
| 0     | 0.04  | -0.03 | 0.01  | 0.85 | 0.011   | 0.0096   | 0.74    | NA | NA | NA | NA |
| 0.01  | 0.03  | -0.03 | 0.02  | 0.86 | 0.45    | 0.06     | 0.22    | NA | NA | NA | NA |
| -0.01 | 0.24  | 0     | 0.1   | 0.87 | 0.00024 | 1        | 0.001   | NA | NA | NA | NA |



|       |       |       |       |      |         |          |          |    |    |    |    |
|-------|-------|-------|-------|------|---------|----------|----------|----|----|----|----|
| -0.01 | -0.06 | -0.08 | -0.06 | 0.87 | 0.17    | 0.0044   | 0.074    | NA | NA | NA | NA |
| -0.02 | 0.06  | -0.05 | 0.04  | 0.87 | 0.17    | 0.074    | 0.16     | NA | NA | NA | NA |
| -0.05 | 0.17  | -0.09 | 0.22  | 0.88 | 0.067   | 0.0066   | 7.80E-05 | NA | NA | NA | NA |
| -0.05 | 0.23  | -0.12 | 0.05  | 0.88 | 0.057   | 0.0024   | 0.45     | NA | NA | NA | NA |
| 0     | -0.03 | -0.03 | 0.03  | 0.88 | 0.088   | 0.019    | 0.014    | NA | NA | NA | NA |
| -0.01 | -0.03 | -0.01 | 0.09  | 0.88 | 0.23    | 0.61     | 0.00068  | NA | NA | NA | NA |
| -0.01 | 0     | 0     | 0.04  | 0.88 | 1       | 1        | 0.066    | NA | NA | NA | NA |
| -0.01 | 0.06  | -0.05 | 0.06  | 0.88 | 0.32    | 0.054    | 0.095    | NA | NA | NA | NA |
| -0.01 | 0.01  | 0     | -0.03 | 0.89 | 0.81    | 0.98     | 0.2      | NA | NA | NA | NA |
| -0.03 | 0.07  | -0.04 | 0.07  | 0.89 | 0.048   | 0.0024   | 0.0011   | NA | NA | NA | NA |
| -0.01 | -0.01 | -0.05 | 0.01  | 0.89 | 0.97    | 0.043    | 0.83     | NA | NA | NA | NA |
| -0.05 | -0.14 | -0.14 | NA    | 0.89 | 0.22    | 0.057    | NA       | NA | NA | NA | NA |
| -0.04 | -0.02 | -0.03 | 0.09  | 0.9  | 1       | 0.13     | 0.027    | NA | NA | NA | NA |
| -0.06 | NA    | 0.1   | 0.67  | 0.9  | NA      | 0.67     | 0.096    | NA | NA | NA | NA |
| 0.01  | 0.02  | -0.05 | 0.03  | 0.9  | 0.49    | 0.00052  | 0.065    | NA | NA | NA | NA |
| 0     | 0.07  | -0.03 | -0.04 | 0.9  | 0.00097 | 0.064    | 0.0066   | NA | NA | NA | NA |
| 0.12  | NA    | -0.16 | 0     | 0.91 | NA      | 0.00028  | 1        | NA | NA | NA | NA |
| 0.19  | -0.03 | -0.19 | 0.02  | 0.91 | 1       | 0.00011  | 0.85     | NA | NA | NA | NA |
| 0.05  | -0.04 | 0.01  | 0.07  | 0.92 | 0.9     | 0.77     | 0.00058  | NA | NA | NA | NA |
| 0.01  | 0.01  | 0     | -0.01 | 0.92 | 0.7     | 1        | 0.46     | NA | NA | NA | NA |
| 0.01  | -0.04 | -0.29 | -0.33 | 0.92 | 0.57    | 4.80E-07 | 4.10E-09 | NA | NA | NA | NA |
| -0.01 | -0.03 | -0.06 | -0.02 | 0.93 | 0.64    | 0.077    | 0.61     | NA | NA | NA | NA |
| 0     | -0.01 | -0.05 | 0.07  | 0.93 | 0.49    | 0.0033   | 0.00089  | NA | NA | NA | NA |
| -0.11 | -0.22 | -0.06 | 0.05  | 0.94 | 0.53    | 0.12     | 0.27     | NA | NA | NA | NA |
| 0     | 0.04  | 0     | 0.02  | 0.95 | 0.0071  | 0.79     | 0.067    | NA | NA | NA | NA |
| 0.07  | 0.05  | -0.06 | -0.01 | 0.95 | 0.85    | 0.012    | 0.82     | NA | NA | NA | NA |
| -0.02 | 0.18  | -0.01 | 0.04  | 0.95 | 0.13    | 0.66     | 0.22     | NA | NA | NA | NA |
| -0.01 | -0.08 | 0.05  | 0.16  | 0.95 | 0.18    | 0.12     | 7.60E-07 | NA | NA | NA | NA |
| 0     | 0.03  | -0.05 | 0.03  | 0.97 | 0.22    | 0.0027   | 0.084    | NA | NA | NA | NA |
| 0     | 0.04  | -0.03 | -0.01 | 0.97 | 0.0063  | 0.024    | 0.33     | NA | NA | NA | NA |

|       |       |       |       |      |          |          |          |    |    |    |    |
|-------|-------|-------|-------|------|----------|----------|----------|----|----|----|----|
| 0     | 0.17  | 0     | 0.07  | 0.97 | 6.70E-08 | 0.96     | 1.10E-05 | NA | NA | NA | NA |
| 0     | 0     | -0.06 | 0.05  | 0.97 | 1        | 0.00019  | 0.012    | NA | NA | NA | NA |
| 0.01  | 0     | 0.01  | 0.12  | 0.98 | 1        | 0.68     | 2.70E-07 | NA | NA | NA | NA |
| 0     | 0.06  | -0.01 | 0.08  | 0.98 | 0.02     | 0.68     | 1.60E-05 | NA | NA | NA | NA |
| -0.01 | 0.18  | -0.11 | -0.01 | 0.98 | 0.088    | 0.2      | 1        | NA | NA | NA | NA |
| 0     | 0.02  | -0.03 | 0.03  | 0.99 | 0.32     | 0.024    | 0.12     | NA | NA | NA | NA |
| -0.01 | -0.04 | -0.03 | 0.03  | 0.99 | 0.26     | 0.3      | 0.33     | NA | NA | NA | NA |
| -0.02 | 0     | 0.02  | -0.08 | 0.99 | 1        | 0.84     | 0.055    | NA | NA | NA | NA |
| 0.02  | 0.02  | -0.13 | -0.12 | 0.99 | 0.89     | 1.00E-04 | 0.002    | NA | NA | NA | NA |
| 0.22  | -0.44 | NA    | NA    | 1    | 0.48     | NA       | NA       | NA | NA | NA | NA |
| -0.02 | 0.11  | -0.09 | -0.05 | 1    | 0.58     | 0.092    | 0.42     | NA | NA | NA | NA |
| 0     | -0.09 | -0.03 | 0.03  | 1    | 0.015    | 0.043    | 0.054    | NA | NA | NA | NA |
| 0     | -0.02 | -0.04 | 0.02  | 1    | 0.45     | 0.0098   | 0.23     | NA | NA | NA | NA |
| 0     | -0.07 | -0.01 | -0.05 | 1    | 0.089    | 0.74     | 0.043    | NA | NA | NA | NA |
| -0.01 | 0.06  | -0.11 | 0.02  | 1    | 0.75     | 0.19     | 1        | NA | NA | NA | NA |
| 0     | 0     | NA    | NA    | 1    | 1        | NA       | NA       | NA | NA | NA | NA |
| 0.01  | 0.13  | -0.05 | 0.03  | 1    | 0.1      | 0.3      | 0.71     | NA | NA | NA | NA |
| -0.01 | 0.02  | -0.04 | -0.02 | 1    | 0.76     | 0.27     | 0.59     | NA | NA | NA | NA |
| 0     | 0     | -0.02 | 0.03  | 1    | 1        | 0.41     | 0.17     | NA | NA | NA | NA |
| 0.01  | -0.03 | 0     | 0.07  | 1    | 0.42     | 1        | 0.073    | NA | NA | NA | NA |
| 0     | -0.06 | -0.06 | 0.03  | 1    | 0.21     | 0.0071   | 0.31     | NA | NA | NA | NA |
| 0     | 0.03  | 0.03  | 0.05  | 1    | 0.25     | 0.12     | 0.035    | NA | NA | NA | NA |
| 0     | 0     | 0.05  | 0.04  | 1    | 1        | 0.022    | 0.091    | NA | NA | NA | NA |
| 0     | NA    | -0.24 | 0.13  | 1    | NA       | 0.21     | 1        | NA | NA | NA | NA |
| 0     | 0     | -0.02 | 0     | 1    | 1        | 1        | 1        | NA | NA | NA | NA |
| 0     | 0.06  | -0.07 | -0.05 | 1    | 0.02     | 5.10E-06 | 0.00051  | NA | NA | NA | NA |
| -0.03 | 0.1   | -0.09 | -0.03 | 1    | 0.28     | 0.0015   | 0.4      | NA | NA | NA | NA |
| 0     | 0.09  | -0.08 | -0.04 | 1    | 0.011    | 4.20E-06 | 0.13     | NA | NA | NA | NA |
| -0.01 | 0.1   | -0.07 | -0.03 | 1    | 0.035    | 0.053    | 0.46     | NA | NA | NA | NA |
| 0     | 0     | -0.06 | -0.06 | 1    | 0.81     | 0.0036   | 0.0052   | NA | NA | NA | NA |

|       |       |       |       |   |       |        |         |    |    |    |    |
|-------|-------|-------|-------|---|-------|--------|---------|----|----|----|----|
| 0.01  | -0.03 | -0.02 | 0.05  | 1 | 1     | 0.72   | 0.11    | NA | NA | NA | NA |
| 0.01  | -0.11 | 0.04  | 0.01  | 1 | 0.39  | 0.94   | 1       | NA | NA | NA | NA |
| 0     | NA    | -0.56 | 0     | 1 | NA    | 0.088  | 1       | NA | NA | NA | NA |
| -0.04 | NA    | -0.06 | -0.02 | 1 | NA    | 0.68   | 1       | NA | NA | NA | NA |
| 0.06  | 0.02  | 0.02  | 0.01  | 1 | 1     | 0.8    | 0.74    | NA | NA | NA | NA |
| 0     | 0.07  | -0.09 | -0.03 | 1 | 0.12  | 0.16   | 0.62    | NA | NA | NA | NA |
| 0     | -0.03 | -0.07 | 0.06  | 1 | 0.58  | 0.0057 | 0.083   | NA | NA | NA | NA |
| 0     | NA    | NA    | NA    | 1 | NA    | NA     | NA      | NA | NA | NA | NA |
| -0.01 | 0.06  | -0.08 | -0.05 | 1 | 1     | 0.039  | 0.33    | NA | NA | NA | NA |
| -0.04 | 0.02  | -0.04 | -0.02 | 1 | 0.98  | 0.33   | 0.78    | NA | NA | NA | NA |
| 0.02  | -0.07 | -0.09 | 0.06  | 1 | 0.95  | 0.0023 | 0.13    | NA | NA | NA | NA |
| 0     | 0.01  | 0     | 0.01  | 1 | 0.8   | 0.8    | 0.44    | NA | NA | NA | NA |
| 0     | 0.03  | -0.04 | 0.02  | 1 | 0.14  | 0.0049 | 0.1     | NA | NA | NA | NA |
| 0     | 0     | -0.03 | -0.03 | 1 | 1     | 0.054  | 0.047   | NA | NA | NA | NA |
| -0.13 | 0.03  | 0.03  | 0.54  | 1 | 1     | 0.82   | 0.0024  | NA | NA | NA | NA |
| 0.01  | 0.14  | -0.06 | 0     | 1 | 0.077 | 0.0032 | 0.93    | NA | NA | NA | NA |
| -0.01 | -0.12 | -0.07 | -0.02 | 1 | 0.011 | 0.0026 | 0.52    | NA | NA | NA | NA |
| 0.01  | 0.08  | -0.1  | -0.01 | 1 | 0.31  | 0.001  | 0.88    | NA | NA | NA | NA |
| -0.2  | NA    | NA    | NA    | 1 | NA    | NA     | NA      | NA | NA | NA | NA |
| 0     | 0.01  | -0.08 | -0.06 | 1 | 0.8   | 0.0032 | 0.018   | NA | NA | NA | NA |
| 0     | -0.01 | 0     | 0.07  | 1 | 1     | 1      | 0.025   | NA | NA | NA | NA |
| -0.01 | 0     | 0.01  | 0.08  | 1 | 1     | 0.82   | 0.042   | NA | NA | NA | NA |
| 0     | 0.12  | 0.04  | 0     | 1 | 0.35  | 0.3    | 1       | NA | NA | NA | NA |
| 0     | 0.02  | 0.06  | 0.1   | 1 | 0.71  | 0.012  | 0.00025 | NA | NA | NA | NA |
| -0.04 | -0.46 | 0.02  | 0.06  | 1 | 0.023 | 0.92   | 0.68    | NA | NA | NA | NA |
| 0     | -0.19 | 0     | 0.19  | 1 | 0.34  | 1      | 0.69    | NA | NA | NA | NA |
| 0     | -0.04 | -0.05 | 0.04  | 1 | 0.19  | 0.015  | 0.095   | NA | NA | NA | NA |
| 0     | 0.02  | -0.03 | 0.05  | 1 | 0.31  | 0.05   | 0.0031  | NA | NA | NA | NA |
| 0     | -0.31 | -0.02 | 0.06  | 1 | 0.86  | 0.53   | 0.35    | NA | NA | NA | NA |
| 0     | 0     | NA    | NA    | 1 | 1     | NA     | NA      | NA | NA | NA | NA |

|       |       |       |       |    |          |          |         |    |    |    |    |
|-------|-------|-------|-------|----|----------|----------|---------|----|----|----|----|
| 0     | -0.02 | -0.07 | -0.04 | 1  | 0.5      | 2.20E-08 | 0.012   | NA | NA | NA | NA |
| 0     | 0     | -0.02 | 0.04  | 1  | 1        | 0.6      | 0.11    | NA | NA | NA | NA |
| -0.01 | 0.05  | -0.06 | -0.03 | 1  | 0.64     | 0.039    | 0.49    | NA | NA | NA | NA |
| 0     | 0.07  | -0.12 | -0.04 | 1  | 0.98     | 0.0012   | 0.48    | NA | NA | NA | NA |
| 0.03  | 0.03  | -0.11 | -0.16 | 1  | 1        | 0.058    | 0.00053 | NA | NA | NA | NA |
| 0.01  | -0.02 | -0.08 | 0.03  | 1  | 1        | 0.013    | 0.4     | NA | NA | NA | NA |
| -0.01 | -0.01 | -0.18 | -0.28 | 1  | 1        | 0.0015   | 0.00015 | NA | NA | NA | NA |
| -0.05 | 0.18  | -0.18 | -0.14 | 1  | 0.23     | 0.00026  | 0.1     | NA | NA | NA | NA |
| 0     | 0.01  | -0.05 | 0.03  | 1  | 0.84     | 0.047    | 0.47    | NA | NA | NA | NA |
| 0.01  | 0.03  | -0.07 | 0.03  | 1  | 0.19     | 0.00039  | 0.24    | NA | NA | NA | NA |
| 0.03  | 0.53  | -0.05 | 0.13  | 1  | 6.50E-09 | 0.12     | 0.00027 | NA | NA | NA | NA |
| 0     | -0.06 | 0.1   | 0.13  | 1  | 0.55     | 0.19     | 0.1     | NA | NA | NA | NA |
| NA    | -0.9  | -0.01 | 0.39  | NA | 0.029    | 1        | 0.048   | NA | NA | NA | NA |
| NA    | NA    | -0.08 | -0.05 | NA | NA       | 0.19     | 0.58    | NA | NA | NA | NA |
| NA    | NA    | NA    | NA    | NA | NA       | NA       | NA      | NA | NA | NA | NA |
| NA    | NA    | 0.07  | 0.07  | NA | NA       | 0.66     | 0.81    | NA | NA | NA | NA |
| NA    | NA    | -0.02 | 0.07  | NA | NA       | 1        | 0.92    | NA | NA | NA | NA |
| NA    | 0.75  | NA    | NA    | NA | 0.069    | NA       | NA      | NA | NA | NA | NA |
| NA    | -0.15 | 0.06  | 0.14  | NA | 1        | 0.35     | 0.013   | NA | NA | NA | NA |
| NA    | NA    | 0.2   | 0.02  | NA | NA       | 0.11     | 1       | NA | NA | NA | NA |
| NA    | NA    | -0.07 | -0.07 | NA | NA       | 0.51     | 0.42    | NA | NA | NA | NA |
| NA    | NA    | 0     | NA    | NA | NA       | 1        | NA      | NA | NA | NA | NA |
| NA    | -0.01 | -0.01 | -0.02 | NA | 1        | 0.92     | 1       | NA | NA | NA | NA |
| NA    | NA    | 0.01  | 0.01  | NA | NA       | 1        | 1       | NA | NA | NA | NA |
| NA    | 0.44  | NA    | NA    | NA | 0.71     | NA       | NA      | NA | NA | NA | NA |
| NA    | 0     | 0     | 0     | NA | 1        | 1        | 1       | NA | NA | NA | NA |
| NA    | -0.88 | -0.03 | 0.27  | NA | 0.057    | 1        | 0.045   | NA | NA | NA | NA |
| NA    | NA    | -0.14 | 0.08  | NA | NA       | 0.24     | 1       | NA | NA | NA | NA |
| NA    | NA    | 0.12  | -0.05 | NA | NA       | 0.2      | 0.56    | NA | NA | NA | NA |
| NA    | NA    | NA    | 0     | NA | NA       | NA       | 1       | NA | NA | NA | NA |

|    |       |       |       |    |          |        |        |    |    |    |    |
|----|-------|-------|-------|----|----------|--------|--------|----|----|----|----|
| NA | NA    | -0.01 | 0.35  | NA | NA       | 1      | 0.11   | NA | NA | NA | NA |
| NA | 0.75  | 0.02  | 0.58  | NA | 0.097    | 1      | 0.046  | NA | NA | NA | NA |
| NA | NA    | -0.05 | 0.03  | NA | NA       | 0.25   | 0.65   | NA | NA | NA | NA |
| NA | NA    | NA    | NA    | NA | NA       | NA     | NA     | NA | NA | NA | NA |
| NA | NA    | 0.5   | NA    | NA | NA       | 0.48   | NA     | NA | NA | NA | NA |
| NA | NA    | NA    | NA    | NA | NA       | NA     | NA     | NA | NA | NA | NA |
| NA | 0     | -0.22 | 0.18  | NA | 1        | 0.046  | 0.31   | NA | NA | NA | NA |
| NA | NA    | -0.04 | 0.1   | NA | NA       | 0.12   | 0.0051 | NA | NA | NA | NA |
| NA | NA    | -0.05 | 0.04  | NA | NA       | 0.15   | 0.32   | NA | NA | NA | NA |
| NA | NA    | NA    | NA    | NA | NA       | NA     | NA     | NA | NA | NA | NA |
| NA | NA    | 0.12  | NA    | NA | NA       | 0.71   | NA     | NA | NA | NA | NA |
| NA | NA    | -0.12 | NA    | NA | NA       | 0.74   | NA     | NA | NA | NA | NA |
| NA | NA    | -0.13 | NA    | NA | NA       | 0.079  | NA     | NA | NA | NA | NA |
| NA | NA    | -0.01 | 0     | NA | NA       | 1      | 1      | NA | NA | NA | NA |
| NA | NA    | 0.05  | NA    | NA | NA       | 1      | NA     | NA | NA | NA | NA |
| NA | NA    | -0.13 | -0.07 | NA | NA       | 0.0028 | 0.18   | NA | NA | NA | NA |
| NA | -0.33 | -0.03 | -0.08 | NA | 0.69     | 0.73   | 0.52   | NA | NA | NA | NA |
| NA | 0.03  | -0.1  | 0.12  | NA | 0.99     | 0.0016 | 0.0028 | NA | NA | NA | NA |
| NA | NA    | 0.1   | NA    | NA | NA       | 0.63   | NA     | NA | NA | NA | NA |
| NA | 0.37  | 0.01  | 0.03  | NA | 1.80E-05 | 0.84   | 0.61   | NA | NA | NA | NA |
| NA | NA    | NA    | NA    | NA | NA       | NA     | NA     | NA | NA | NA | NA |
| NA | NA    | NA    | NA    | NA | NA       | NA     | NA     | NA | NA | NA | NA |
| NA | 0.07  | -0.06 | 0.08  | NA | 1        | 0.27   | 0.16   | NA | NA | NA | NA |
| NA | NA    | 0.01  | NA    | NA | NA       | 1      | NA     | NA | NA | NA | NA |
| NA | NA    | NA    | NA    | NA | NA       | NA     | NA     | NA | NA | NA | NA |
| NA | NA    | -0.06 | 0.15  | NA | NA       | 0.3    | 0.22   | NA | NA | NA | NA |
| NA | NA    | 0.01  | 0.02  | NA | NA       | 1      | 1      | NA | NA | NA | NA |
| NA | NA    | -0.09 | 0     | NA | NA       | 0.18   | 1      | NA | NA | NA | NA |
| NA | -0.5  | 0     | -0.11 | NA | 1        | 1      | 0.66   | NA | NA | NA | NA |
| NA | NA    | -0.24 | 0.12  | NA | NA       | 0.0017 | 0.49   | NA | NA | NA | NA |

|       |       |       |       |          |          |          |          |    |    |    |    |
|-------|-------|-------|-------|----------|----------|----------|----------|----|----|----|----|
| NA    | NA    | NA    | NA    | NA       | NA       | NA       | NA       | NA | NA | NA | NA |
| NA    | NA    | NA    | NA    | NA       | NA       | NA       | NA       | NA | NA | NA | NA |
| NA    | NA    | 0     | NA    | NA       | NA       | 1        | NA       | NA | NA | NA | NA |
| NA    | NA    | 0.01  | -0.1  | NA       | NA       | 0.93     | 0.34     | NA | NA | NA | NA |
| NA    | -0.02 | -0.04 | -0.06 | NA       | 1        | 0.3      | 0.72     | NA | NA | NA | NA |
| NA    | NA    | NA    | NA    | NA       | NA       | NA       | NA       | NA | NA | NA | NA |
| NA    | NA    | -0.25 | 0     | NA       | NA       | 1        | 1        | NA | NA | NA | NA |
| NA    | NA    | -0.05 | 0.82  | NA       | NA       | 0.4      | 2.00E-04 | NA | NA | NA | NA |
| NA    | NA    | NA    | NA    | NA       | NA       | NA       | NA       | NA | NA | NA | NA |
| NA    | NA    | NA    | NA    | NA       | NA       | NA       | NA       | NA | NA | NA | NA |
| NA    | NA    | NA    | NA    | NA       | NA       | NA       | NA       | NA | NA | NA | NA |
| 0.23  | 0.2   | -0.02 | -0.01 | 8.80E-09 | 1.30E-06 | 0.4      | 0.67     | NA | NA | NA | NA |
| 0.19  | 0.13  | -0.03 | -0.01 | 1.00E-08 | 0.00022  | 0.04     | 0.67     | NA | NA | NA | NA |
| 0.17  | 0.01  | -0.01 | 0     | 2.70E-08 | 0.6      | 0.75     | 0.92     | NA | NA | NA | NA |
| 0.19  | -0.01 | -0.08 | 0     | 4.90E-08 | 0.85     | 5.90E-09 | 1        | NA | NA | NA | NA |
| 0.28  | 0.06  | -0.06 | -0.01 | 5.60E-08 | 0.04     | 4.80E-06 | 0.59     | NA | NA | NA | NA |
| 0.39  | 0.05  | -0.06 | -0.04 | 7.00E-08 | 0.16     | 3.50E-05 | 0.025    | NA | NA | NA | NA |
| 0.39  | 0.07  | -0.01 | 0.14  | 1.30E-07 | 0.34     | 0.89     | 9.40E-05 | NA | NA | NA | NA |
| 0.27  | 0.03  | -0.04 | -0.02 | 2.10E-07 | 0.33     | 0.053    | 0.46     | NA | NA | NA | NA |
| 0.24  | 0.09  | -0.02 | -0.01 | 2.30E-07 | 0.03     | 0.53     | 0.65     | NA | NA | NA | NA |
| 0.17  | 0.01  | -0.01 | 0.03  | 2.30E-07 | 0.95     | 0.8      | 0.081    | NA | NA | NA | NA |
| 0.49  | 0.56  | 0.12  | -0.09 | 4.90E-07 | 0.00022  | 0.22     | 0.32     | NA | NA | NA | NA |
| 0.29  | 0.05  | -0.04 | 0     | 7.30E-07 | 0.09     | 0.0033   | 0.98     | NA | NA | NA | NA |
| 0.08  | 0.08  | -0.05 | 0     | 8.00E-07 | 3.50E-09 | 2.40E-06 | 0.85     | NA | NA | NA | NA |
| 0.5   | 0.07  | -0.09 | 0.39  | 8.10E-07 | 0.48     | 0.28     | 8.30E-06 | NA | NA | NA | NA |
| 0.31  | 0.03  | -0.03 | 0.02  | 1.60E-06 | 0.25     | 0.046    | 0.39     | NA | NA | NA | NA |
| -0.39 | -0.27 | -0.05 | -0.01 | 1.70E-06 | 0.012    | 0.058    | 0.78     | NA | NA | NA | NA |
| 0.95  | 0.2   | -0.21 | -0.12 | 2.00E-06 | 0.57     | 6.30E-05 | 0.048    | NA | NA | NA | NA |
| 0.27  | 0.11  | -0.06 | -0.03 | 2.50E-06 | 0.046    | 0.17     | 0.44     | NA | NA | NA | NA |
| 0.13  | 0     | -0.03 | 0.03  | 2.90E-06 | 1        | 0.061    | 0.024    | NA | NA | NA | NA |

|       |       |       |       |          |          |          |         |    |    |    |    |
|-------|-------|-------|-------|----------|----------|----------|---------|----|----|----|----|
| 0.16  | 0.04  | 0.01  | -0.05 | 3.20E-06 | 0.11     | 0.84     | 0.039   | NA | NA | NA | NA |
| 0.17  | 0.11  | -0.01 | 0.06  | 5.70E-06 | 0.0027   | 0.38     | 0.00068 | NA | NA | NA | NA |
| -0.73 | -0.67 | -0.02 | -0.03 | 2.00E-05 | 6.80E-05 | 0.7      | 0.62    | NA | NA | NA | NA |
| 0.91  | 0.04  | -0.08 | -0.04 | 2.60E-05 | 0.49     | 0.0017   | 0.17    | NA | NA | NA | NA |
| 0.12  | 0.06  | -0.04 | 0.03  | 2.70E-05 | 0.018    | 0.00029  | 0.0036  | NA | NA | NA | NA |
| 0.22  | 0.03  | -0.05 | 0.06  | 3.30E-05 | 0.28     | 3.20E-05 | 0.00015 | NA | NA | NA | NA |
| 0.25  | 0.17  | -0.05 | 0     | 4.40E-05 | 1.20E-06 | 0.0031   | 0.89    | NA | NA | NA | NA |
| 0.92  | 0.17  | -0.14 | -0.04 | 5.20E-05 | 0.13     | 7.20E-06 | 0.41    | NA | NA | NA | NA |
| 0.13  | 0.08  | -0.07 | -0.01 | 5.50E-05 | 0.00027  | 9.70E-08 | 0.63    | NA | NA | NA | NA |
| 0.22  | 0.1   | -0.01 | 0     | 5.60E-05 | 0.022    | 0.88     | 0.92    | NA | NA | NA | NA |
| 0.12  | 0.11  | -0.04 | -0.04 | 5.90E-05 | 0.00034  | 0.0097   | 0.0095  | NA | NA | NA | NA |
| 0.69  | 0.09  | -0.01 | 0.03  | 6.20E-05 | 0.02     | 0.87     | 0.36    | NA | NA | NA | NA |
| 0.27  | 0.08  | -0.01 | 0.03  | 9.60E-05 | 0.039    | 0.41     | 0.12    | NA | NA | NA | NA |
| 0.15  | 0.1   | -0.07 | -0.03 | 0.00011  | 0.0012   | 6.70E-08 | 0.052   | NA | NA | NA | NA |
| -0.13 | -0.03 | -0.04 | 0.05  | 0.00012  | 0.66     | 0.0012   | 0.013   | NA | NA | NA | NA |
| 0.18  | 0.02  | -0.07 | -0.01 | 0.00012  | 0.89     | 5.00E-06 | 0.61    | NA | NA | NA | NA |
| -0.79 | -0.55 | 0.35  | 0.57  | 0.00012  | 0.011    | 0.003    | 0.00046 | NA | NA | NA | NA |
| 0.16  | 0.02  | -0.05 | -0.03 | 0.00014  | 0.41     | 0.007    | 0.17    | NA | NA | NA | NA |
| 0.2   | 0.16  | 0.02  | 0     | 0.00019  | 0.00036  | 0.21     | 1       | NA | NA | NA | NA |
| -0.11 | 0.12  | -0.04 | 0.02  | 0.00027  | 0.024    | 0.0074   | 0.28    | NA | NA | NA | NA |
| 0.27  | 0.16  | -0.04 | 0.01  | 0.00028  | 0.00047  | 0.029    | 0.84    | NA | NA | NA | NA |
| -0.08 | -0.04 | 0.01  | 0.02  | 0.00029  | 0.055    | 0.59     | 0.06    | NA | NA | NA | NA |
| 0.14  | 0     | -0.02 | 0.02  | 0.00043  | 0.91     | 0.16     | 0.24    | NA | NA | NA | NA |
| 0.1   | 0.04  | -0.02 | -0.02 | 5.00E-04 | 0.11     | 0.29     | 0.075   | NA | NA | NA | NA |
| 0.28  | 0.16  | 0     | 0.01  | 0.00052  | 0.0015   | 0.97     | 0.81    | NA | NA | NA | NA |
| -0.12 | -0.11 | 0.02  | 0.07  | 0.00052  | 0.00019  | 0.37     | 0.0042  | NA | NA | NA | NA |
| 0.44  | 0.14  | -0.1  | -0.08 | 0.00057  | 0.035    | 0.0017   | 0.062   | NA | NA | NA | NA |
| 0.13  | 0.03  | -0.01 | 0.05  | 0.00058  | 0.15     | 0.34     | 0.0017  | NA | NA | NA | NA |
| 0.21  | 0.01  | -0.19 | -0.07 | 0.00063  | 0.92     | 2.00E-09 | 0.065   | NA | NA | NA | NA |
| 0.14  | -0.05 | 0     | -0.01 | 0.00064  | 0.15     | 0.88     | 0.85    | NA | NA | NA | NA |

|       |       |       |       |          |          |          |          |    |    |    |    |
|-------|-------|-------|-------|----------|----------|----------|----------|----|----|----|----|
| 0.12  | 0.18  | -0.07 | 0.01  | 0.00077  | 1.10E-07 | 1.40E-08 | 0.3      | NA | NA | NA | NA |
| 0.09  | 0.01  | -0.06 | 0     | 9.00E-04 | 0.65     | 2.70E-07 | 0.94     | NA | NA | NA | NA |
| 0.1   | 0.17  | -0.05 | 0.04  | 0.0015   | 2.90E-09 | 0.0016   | 0.054    | NA | NA | NA | NA |
| -0.11 | -0.02 | -0.07 | -0.02 | 0.0016   | 0.69     | 0.00012  | 0.41     | NA | NA | NA | NA |
| 0.13  | 0.05  | -0.02 | 0.02  | 0.0016   | 0.042    | 0.42     | 0.54     | NA | NA | NA | NA |
| 0.1   | 0.04  | -0.03 | 0     | 0.0017   | 0.071    | 0.064    | 0.88     | NA | NA | NA | NA |
| 0.22  | 0.08  | -0.11 | 0.05  | 0.0017   | 0.08     | 1.70E-05 | 0.1      | NA | NA | NA | NA |
| 0.13  | 0.11  | 0.03  | 0.06  | 0.0018   | 0.0046   | 0.24     | 0.02     | NA | NA | NA | NA |
| 0.41  | 0     | -0.06 | 0.05  | 0.002    | 1        | 0.048    | 0.076    | NA | NA | NA | NA |
| 0.11  | 0.16  | -0.09 | 0.01  | 0.0021   | 6.00E-07 | 2.50E-06 | 0.71     | NA | NA | NA | NA |
| 0.2   | -0.01 | -0.04 | -0.04 | 0.0021   | 0.99     | 0.12     | 0.19     | NA | NA | NA | NA |
| 0.18  | 0.07  | -0.04 | -0.02 | 0.0023   | 0.13     | 0.082    | 0.47     | NA | NA | NA | NA |
| 0.1   | 0.11  | -0.06 | -0.03 | 0.0023   | 1.40E-05 | 0.00034  | 0.078    | NA | NA | NA | NA |
| 0.09  | 0.02  | 0     | 0.03  | 0.0025   | 0.38     | 0.75     | 0.013    | NA | NA | NA | NA |
| 0.44  | NA    | 0.38  | 0.43  | 0.0026   | NA       | 8.90E-05 | 0.0017   | NA | NA | NA | NA |
| 0.33  | 0.03  | -0.05 | -0.02 | 0.0026   | 0.53     | 0.053    | 0.61     | NA | NA | NA | NA |
| 0.06  | 0.05  | -0.02 | 0.03  | 0.0028   | 0.021    | 0.29     | 0.052    | NA | NA | NA | NA |
| 0.19  | 0.03  | -0.04 | 0.12  | 0.0028   | 0.52     | 0.092    | 9.90E-05 | NA | NA | NA | NA |
| 0.21  | 0.05  | -0.01 | 0.04  | 0.0029   | 0.55     | 0.58     | 0.07     | NA | NA | NA | NA |
| 0.14  | 0.1   | 0     | 0.09  | 0.003    | 0.00044  | 0.95     | 9.00E-07 | NA | NA | NA | NA |
| 0.12  | -0.02 | -0.04 | 0.08  | 0.003    | 0.32     | 0.0065   | 9.70E-07 | NA | NA | NA | NA |
| 0.09  | 0.02  | -0.02 | 0.04  | 0.003    | 0.44     | 0.052    | 0.0032   | NA | NA | NA | NA |
| 0.11  | 0.14  | 0     | 0.05  | 0.0031   | 0.0016   | 1        | 0.017    | NA | NA | NA | NA |
| 0.81  | 0.01  | -0.03 | 0.05  | 0.0031   | 1        | 0.19     | 0.033    | NA | NA | NA | NA |
| 0.17  | -0.19 | -0.11 | -0.16 | 0.0039   | 0.0012   | 0.003    | 1.90E-05 | NA | NA | NA | NA |
| 0.19  | -0.02 | -0.15 | -0.09 | 0.0041   | 0.75     | 2.30E-08 | 0.0069   | NA | NA | NA | NA |
| 0.96  | 0.1   | -0.06 | 0.05  | 0.0042   | 0.43     | 0.12     | 0.38     | NA | NA | NA | NA |
| 0.16  | 0.08  | -0.07 | 0.01  | 0.0043   | 0.058    | 6.30E-05 | 0.86     | NA | NA | NA | NA |
| 0.12  | 0.03  | -0.02 | 0.05  | 0.0043   | 0.22     | 0.14     | 0.013    | NA | NA | NA | NA |
| 0.17  | 0.03  | -0.06 | -0.02 | 0.005    | 0.46     | 0.011    | 0.4      | NA | NA | NA | NA |



|       |       |       |       |        |          |          |          |    |    |    |    |
|-------|-------|-------|-------|--------|----------|----------|----------|----|----|----|----|
| 0.21  | 0.07  | -0.09 | -0.01 | 0.0054 | 0.46     | 0.033    | 0.95     | NA | NA | NA | NA |
| 0.13  | 0.04  | -0.04 | -0.01 | 0.0054 | 0.18     | 0.058    | 0.73     | NA | NA | NA | NA |
| 0.18  | -0.01 | -0.02 | 0.04  | 0.0055 | 0.78     | 0.62     | 0.12     | NA | NA | NA | NA |
| -0.06 | 0.04  | -0.11 | -0.04 | 0.0059 | 0.89     | 0.016    | 0.82     | NA | NA | NA | NA |
| 0.11  | 0.03  | -0.05 | 0     | 0.0062 | 0.39     | 0.00059  | 1        | NA | NA | NA | NA |
| 0.06  | 0.04  | -0.06 | -0.02 | 0.0063 | 0.0032   | 1.00E-05 | 0.1      | NA | NA | NA | NA |
| 0.06  | 0.06  | -0.06 | 0.01  | 0.0063 | 0.017    | 8.70E-05 | 0.5      | NA | NA | NA | NA |
| 0.08  | 0.06  | -0.06 | -0.02 | 0.0063 | 0.049    | 0.00083  | 0.26     | NA | NA | NA | NA |
| 0.12  | 0.07  | -0.04 | 0.09  | 0.0065 | 0.28     | 0.054    | 0.0011   | NA | NA | NA | NA |
| 0.07  | 0.11  | 0.01  | 0.06  | 0.0065 | 5.20E-06 | 0.81     | 0.0024   | NA | NA | NA | NA |
| -0.36 | -0.29 | 0.01  | 0     | 0.0065 | 0.0048   | 0.84     | 1        | NA | NA | NA | NA |
| 0.09  | 0.04  | -0.05 | 0.03  | 0.0066 | 0.14     | 0.00034  | 0.081    | NA | NA | NA | NA |
| 0.21  | 0.02  | -0.05 | -0.1  | 0.0068 | 0.91     | 0.5      | 0.055    | NA | NA | NA | NA |
| 0.09  | 0.03  | -0.05 | 0     | 0.007  | 0.36     | 9.10E-05 | 0.97     | NA | NA | NA | NA |
| 0.17  | 0.19  | -0.07 | 0.04  | 0.007  | 7.00E-05 | 0.013    | 0.27     | NA | NA | NA | NA |
| 0.13  | 0.18  | -0.01 | 0.08  | 0.0073 | 0.005    | 0.69     | 0.00068  | NA | NA | NA | NA |
| -0.07 | 0     | -0.12 | -0.09 | 0.0088 | 1        | 4.60E-06 | 0.00016  | NA | NA | NA | NA |
| 0.28  | 0.04  | -0.1  | 0.06  | 0.009  | 0.56     | 0.0047   | 0.23     | NA | NA | NA | NA |
| 0.14  | 0.06  | -0.06 | 0     | 0.0093 | 0.073    | 0.00025  | 1        | NA | NA | NA | NA |
| -0.15 | -0.04 | -0.04 | 0     | 0.0094 | 0.57     | 0.39     | 1        | NA | NA | NA | NA |
| 0.4   | 0.28  | -0.07 | 0.01  | 0.0095 | 0.015    | 0.0071   | 0.88     | NA | NA | NA | NA |
| 0.12  | 0.09  | 0.03  | 0.3   | 0.0099 | 0.024    | 0.58     | 3.30E-05 | NA | NA | NA | NA |
| 0.07  | 0.05  | -0.05 | -0.03 | 0.01   | 0.00055  | 0.00087  | 0.017    | NA | NA | NA | NA |
| 0.09  | 0.01  | -0.05 | 0.03  | 0.01   | 0.77     | 0.0023   | 0.11     | NA | NA | NA | NA |
| 0.63  | -0.05 | -0.08 | 0.03  | 0.011  | 0.67     | 0.43     | 0.68     | NA | NA | NA | NA |
| 0.11  | 0.01  | -0.06 | -0.02 | 0.011  | 0.85     | 5.00E-04 | 0.44     | NA | NA | NA | NA |
| 0.11  | 0.17  | -0.12 | -0.07 | 0.011  | 5.30E-05 | 2.00E-06 | 0.006    | NA | NA | NA | NA |
| 0.91  | 0.91  | -0.03 | NA    | 0.011  | 0.23     | 0.86     | NA       | NA | NA | NA | NA |
| 0.05  | 0.04  | -0.03 | 0.03  | 0.011  | 0.022    | 0.00075  | 0.0055   | NA | NA | NA | NA |
| 0.07  | 0.02  | -0.02 | 0.05  | 0.011  | 0.32     | 0.14     | 0.0047   | NA | NA | NA | NA |

|       |       |       |       |       |          |          |          |    |    |    |    |
|-------|-------|-------|-------|-------|----------|----------|----------|----|----|----|----|
| 0.05  | 0.04  | -0.06 | -0.01 | 0.012 | 0.077    | 4.90E-08 | 0.58     | NA | NA | NA | NA |
| 0.14  | 0     | -0.06 | 0.04  | 0.013 | 1        | 0.0013   | 0.32     | NA | NA | NA | NA |
| 0.07  | -0.03 | -0.03 | 0.02  | 0.013 | 0.13     | 0.0051   | 0.049    | NA | NA | NA | NA |
| 0.1   | 0.07  | 0     | 0.1   | 0.013 | 0.016    | 0.95     | 1.40E-06 | NA | NA | NA | NA |
| 0.19  | 0.28  | 0.02  | 0.02  | 0.013 | 7.70E-08 | 0.39     | 0.22     | NA | NA | NA | NA |
| 0.12  | 0.31  | -0.07 | -0.02 | 0.013 | 4.70E-09 | 1.60E-05 | 0.44     | NA | NA | NA | NA |
| 0.1   | 0.03  | -0.04 | 0     | 0.014 | 0.3      | 0.00063  | 1        | NA | NA | NA | NA |
| 0.45  | 0.17  | 0.01  | 0.04  | 0.017 | 0.35     | 1        | 0.31     | NA | NA | NA | NA |
| 0.12  | 0.04  | 0.02  | 0.07  | 0.018 | 0.33     | 0.8      | 0.044    | NA | NA | NA | NA |
| 0.11  | -0.01 | -0.02 | 0.02  | 0.02  | 0.81     | 0.21     | 0.28     | NA | NA | NA | NA |
| 0.11  | -0.06 | -0.02 | 0.06  | 0.02  | 0.078    | 0.26     | 4.40E-05 | NA | NA | NA | NA |
| 0.08  | 0     | -0.06 | 0.02  | 0.021 | 1        | 0.14     | 0.55     | NA | NA | NA | NA |
| 0.04  | 0.03  | -0.03 | -0.01 | 0.021 | 0.058    | 0.00058  | 0.23     | NA | NA | NA | NA |
| 0.04  | 0.05  | -0.01 | 0     | 0.021 | 0.015    | 0.74     | 0.97     | NA | NA | NA | NA |
| 0.12  | 0.12  | -0.08 | 0.07  | 0.021 | 0.0047   | 0.0013   | 0.051    | NA | NA | NA | NA |
| 0.07  | 0.07  | 0.02  | 0.07  | 0.022 | 0.009    | 0.089    | 4.40E-07 | NA | NA | NA | NA |
| 0.06  | 0.06  | -0.06 | -0.03 | 0.022 | 0.047    | 0.0016   | 0.25     | NA | NA | NA | NA |
| 0.1   | -0.01 | -0.05 | 0.01  | 0.022 | 0.93     | 0.00057  | 0.48     | NA | NA | NA | NA |
| 0.07  | 0.08  | -0.03 | 0.02  | 0.022 | 0.0015   | 0.038    | 0.17     | NA | NA | NA | NA |
| -0.08 | 0     | -0.04 | 0.03  | 0.023 | 1        | 0.046    | 0.1      | NA | NA | NA | NA |
| 0.16  | 0.12  | -0.03 | 0.03  | 0.023 | 0.0017   | 0.04     | 0.068    | NA | NA | NA | NA |
| 0.09  | 0.02  | -0.09 | 0.04  | 0.023 | 0.51     | 1.20E-05 | 0.15     | NA | NA | NA | NA |
| 0.26  | -0.01 | -0.03 | -0.02 | 0.024 | 0.88     | 0.13     | 0.38     | NA | NA | NA | NA |
| 0.2   | 0.06  | 0     | 0.06  | 0.025 | 0.47     | 1        | 0.07     | NA | NA | NA | NA |
| 0.04  | 0.08  | -0.02 | 0.04  | 0.025 | 5.30E-05 | 0.23     | 0.0036   | NA | NA | NA | NA |
| 0.14  | 0.05  | 0.01  | 0.04  | 0.025 | 0.42     | 0.64     | 0.084    | NA | NA | NA | NA |
| 0.09  | 0.04  | -0.04 | -0.03 | 0.025 | 0.29     | 0.023    | 0.044    | NA | NA | NA | NA |
| 0.21  | -0.03 | -0.03 | 0.1   | 0.025 | 0.72     | 0.64     | 0.14     | NA | NA | NA | NA |
| 0.19  | 0.23  | -0.25 | -0.29 | 0.025 | 0.0049   | 1.30E-05 | 6.20E-06 | NA | NA | NA | NA |
| 0.14  | 0.14  | 0.13  | 0.13  | 0.025 | 0.034    | 0.011    | 0.074    | NA | NA | NA | NA |

|       |       |       |       |       |          |          |          |    |    |    |    |
|-------|-------|-------|-------|-------|----------|----------|----------|----|----|----|----|
| -0.05 | -0.03 | -0.02 | -0.04 | 0.025 | 0.12     | 0.23     | 0.031    | NA | NA | NA | NA |
| -0.15 | -0.36 | -0.11 | -0.17 | 0.026 | 1.00E-05 | 0.062    | 0.068    | NA | NA | NA | NA |
| -0.11 | -0.07 | -0.08 | -0.03 | 0.026 | 0.43     | 2.40E-05 | 0.23     | NA | NA | NA | NA |
| 0.12  | 0.14  | -0.05 | -0.02 | 0.026 | 0.024    | 0.0099   | 0.41     | NA | NA | NA | NA |
| 0.07  | 0     | -0.07 | 0.03  | 0.026 | 1        | 4.20E-05 | 0.11     | NA | NA | NA | NA |
| 0.09  | 0.17  | 0.03  | 0.05  | 0.027 | 0.00048  | 0.23     | 0.069    | NA | NA | NA | NA |
| 0.19  | 0.07  | -0.04 | -0.02 | 0.027 | 0.28     | 0.23     | 0.56     | NA | NA | NA | NA |
| 0.36  | 0.18  | -0.14 | 0.05  | 0.027 | 0.028    | 6.00E-06 | 0.18     | NA | NA | NA | NA |
| 0.07  | 0.08  | 0.02  | 0.06  | 0.028 | 0.0026   | 0.25     | 0.0013   | NA | NA | NA | NA |
| 0.27  | -0.04 | 0     | -0.19 | 0.028 | 1        | 1        | 9.20E-07 | NA | NA | NA | NA |
| 0.11  | -0.01 | -0.05 | -0.01 | 0.029 | 1        | 0.052    | 0.91     | NA | NA | NA | NA |
| 0.1   | 0     | -0.02 | 0.04  | 0.029 | 1        | 0.3      | 0.076    | NA | NA | NA | NA |
| -0.09 | -0.05 | 0.09  | 0.07  | 0.03  | 0.23     | 0.0048   | 0.0069   | NA | NA | NA | NA |
| 0.05  | 0.02  | -0.02 | 0.02  | 0.03  | 0.18     | 0.061    | 0.16     | NA | NA | NA | NA |
| -0.16 | -0.12 | -0.04 | 0.08  | 0.031 | 0.2      | 0.026    | 0.00065  | NA | NA | NA | NA |
| -0.05 | -0.02 | -0.04 | -0.03 | 0.031 | 0.48     | 0.0087   | 0.058    | NA | NA | NA | NA |
| 0.11  | 0.1   | -0.04 | 0     | 0.033 | 0.076    | 0.039    | 1        | NA | NA | NA | NA |
| 0.04  | 0.11  | -0.02 | 0.13  | 0.033 | 0.00025  | 0.22     | 1.30E-08 | NA | NA | NA | NA |
| 0.11  | -0.06 | 0.05  | 0.07  | 0.033 | 0.51     | 0.066    | 0.02     | NA | NA | NA | NA |
| 0.09  | 0.02  | -0.04 | 0     | 0.035 | 0.58     | 4.20E-05 | 0.82     | NA | NA | NA | NA |
| 0.29  | 0.58  | -0.03 | 0.08  | 0.035 | 7.50E-05 | 0.54     | 0.082    | NA | NA | NA | NA |
| -0.06 | -0.01 | -0.02 | 0.04  | 0.036 | 0.89     | 0.084    | 0.008    | NA | NA | NA | NA |
| 0.08  | 0.06  | -0.02 | 0.02  | 0.037 | 0.19     | 0.52     | 0.46     | NA | NA | NA | NA |
| 0.11  | 0.1   | 0.02  | 0.07  | 0.037 | 0.011    | 0.49     | 0.02     | NA | NA | NA | NA |
| -0.17 | -0.17 | 0.02  | 0.07  | 0.037 | 0.0028   | 0.46     | 0.0062   | NA | NA | NA | NA |
| 0.07  | 0.15  | -0.01 | -0.01 | 0.04  | 0.0014   | 0.73     | 0.56     | NA | NA | NA | NA |
| 0.36  | 0.19  | -0.12 | -0.03 | 0.04  | 0.083    | 2.10E-05 | 0.42     | NA | NA | NA | NA |
| 0.08  | 0.16  | -0.03 | 0.01  | 0.04  | 1.00E-08 | 0.086    | 0.62     | NA | NA | NA | NA |
| 0.04  | 0.07  | 0.01  | 0.04  | 0.042 | 9.50E-05 | 0.55     | 0.0022   | NA | NA | NA | NA |
| 0.07  | 0.08  | -0.03 | 0.01  | 0.042 | 0.022    | 0.041    | 0.55     | NA | NA | NA | NA |

|       |       |       |       |       |          |          |          |    |    |    |    |
|-------|-------|-------|-------|-------|----------|----------|----------|----|----|----|----|
| 0.19  | 0.42  | -0.04 | 0.11  | 0.042 | 0.00012  | 0.23     | 0.0094   | NA | NA | NA | NA |
| 0.05  | 0     | -0.04 | 0.02  | 0.042 | 1        | 0.00014  | 0.15     | NA | NA | NA | NA |
| 0.09  | 0.05  | -0.05 | -0.06 | 0.043 | 0.18     | 0.048    | 0.0015   | NA | NA | NA | NA |
| 0.15  | 0.15  | -0.08 | 0.01  | 0.043 | 0.0029   | 0.00031  | 0.89     | NA | NA | NA | NA |
| -0.1  | -0.09 | -0.03 | 0.03  | 0.044 | 0.032    | 0.14     | 0.17     | NA | NA | NA | NA |
| 0.06  | 0.03  | 0.02  | 0.03  | 0.046 | 0.17     | 0.35     | 0.14     | NA | NA | NA | NA |
| 0.96  | 0.06  | -0.14 | NA    | 0.05  | 0.99     | 2.00E-04 | NA       | NA | NA | NA | NA |
| 0.16  | 0.13  | -0.13 | -0.11 | 0.052 | 0.044    | 5.40E-06 | 5.00E-04 | NA | NA | NA | NA |
| -0.06 | -0.03 | 0.03  | 0.06  | 0.054 | 0.5      | 0.25     | 0.008    | NA | NA | NA | NA |
| -0.18 | -0.24 | -0.02 | 0.05  | 0.055 | 0.00026  | 0.34     | 0.035    | NA | NA | NA | NA |
| 0.07  | 0     | -0.08 | -0.03 | 0.055 | 0.98     | 5.80E-05 | 0.19     | NA | NA | NA | NA |
| 0.07  | 0.08  | -0.03 | 0.06  | 0.057 | 0.0041   | 0.06     | 7.00E-05 | NA | NA | NA | NA |
| 0.21  | 0.02  | 0.02  | 0.06  | 0.059 | 0.66     | 0.36     | 0.0077   | NA | NA | NA | NA |
| 0.1   | 0.08  | 0.03  | 0.09  | 0.059 | 0.082    | 0.36     | 0.021    | NA | NA | NA | NA |
| -0.09 | 0.09  | -0.03 | 0.03  | 0.06  | 0.084    | 0.12     | 0.15     | NA | NA | NA | NA |
| 0.25  | -0.09 | 0.07  | -0.03 | 0.06  | 0.93     | 0.25     | 0.38     | NA | NA | NA | NA |
| 0.19  | 0.03  | -0.07 | 0.03  | 0.062 | 0.66     | 0.002    | 0.48     | NA | NA | NA | NA |
| 0.18  | 0.02  | -0.03 | 0.02  | 0.065 | 0.94     | 0.31     | 0.58     | NA | NA | NA | NA |
| -0.14 | 0.14  | -0.08 | 0     | 0.069 | 0.24     | 0.00014  | 0.98     | NA | NA | NA | NA |
| 0.05  | 0.04  | -0.06 | 0.02  | 0.07  | 0.21     | 0.00061  | 0.26     | NA | NA | NA | NA |
| -0.27 | 0.38  | -0.48 | 0     | 0.07  | 0.76     | 0.035    | 1        | NA | NA | NA | NA |
| 0.08  | 0.05  | -0.02 | 0.04  | 0.072 | 0.19     | 0.39     | 0.14     | NA | NA | NA | NA |
| 0.05  | 0.05  | -0.05 | -0.01 | 0.074 | 0.0018   | 5.00E-08 | 0.48     | NA | NA | NA | NA |
| 0.37  | 0.87  | 0.02  | -0.03 | 0.076 | 3.90E-07 | 0.85     | 0.81     | NA | NA | NA | NA |
| 0.05  | 0.03  | -0.05 | -0.01 | 0.077 | 0.14     | 5.00E-04 | 0.76     | NA | NA | NA | NA |
| 0.03  | 0.08  | -0.03 | -0.01 | 0.078 | 3.30E-07 | 0.053    | 0.73     | NA | NA | NA | NA |
| 0.14  | -0.04 | -0.1  | -0.02 | 0.079 | 0.41     | 1.70E-08 | 0.24     | NA | NA | NA | NA |
| 0.28  | -0.04 | -0.03 | -0.08 | 0.079 | 0.78     | 0.6      | 0.013    | NA | NA | NA | NA |
| 0.08  | 0.14  | -0.05 | 0.04  | 0.081 | 0.0012   | 0.022    | 0.13     | NA | NA | NA | NA |
| 0.94  | 0     | -0.01 | -0.03 | 0.082 | 1        | 0.97     | 0.48     | NA | NA | NA | NA |

|       |       |       |       |       |          |          |         |    |    |    |    |
|-------|-------|-------|-------|-------|----------|----------|---------|----|----|----|----|
| 0.1   | -0.01 | -0.01 | -0.01 | 0.083 | 0.87     | 0.7      | 0.82    | NA | NA | NA | NA |
| 0.23  | 0.18  | -0.18 | -0.16 | 0.084 | 0.0068   | 2.20E-05 | 0.0027  | NA | NA | NA | NA |
| 0.16  | -0.06 | 0.02  | 0     | 0.085 | 0.36     | 0.27     | 1       | NA | NA | NA | NA |
| 0.06  | -0.05 | -0.01 | 0.03  | 0.086 | 0.046    | 0.65     | 0.0019  | NA | NA | NA | NA |
| 0.07  | 0     | -0.01 | 0.02  | 0.087 | 0.94     | 0.55     | 0.14    | NA | NA | NA | NA |
| 0.05  | -0.04 | -0.04 | 0.05  | 0.09  | 0.12     | 0.0025   | 0.0081  | NA | NA | NA | NA |
| -0.24 | -0.11 | 0.02  | 0.11  | 0.091 | 0.4      | 0.62     | 0.0089  | NA | NA | NA | NA |
| -0.07 | 0.03  | -0.03 | 0.12  | 0.091 | 0.66     | 0.49     | 0.0025  | NA | NA | NA | NA |
| -0.08 | -0.02 | -0.03 | 0.02  | 0.092 | 0.67     | 0.11     | 0.21    | NA | NA | NA | NA |
| 0.05  | -0.01 | 0.02  | -0.02 | 0.093 | 0.77     | 0.56     | 0.39    | NA | NA | NA | NA |
| 0.13  | 0.01  | -0.08 | -0.03 | 0.096 | 0.86     | 0.0092   | 0.5     | NA | NA | NA | NA |
| 0.11  | 0.08  | 0     | -0.05 | 0.096 | 0.23     | 1        | 0.032   | NA | NA | NA | NA |
| 0.93  | 0.02  | -0.1  | -0.06 | 0.096 | 1        | 0.088    | 0.37    | NA | NA | NA | NA |
| 0.11  | 0.08  | -0.02 | 0.01  | 0.097 | 0.1      | 0.4      | 0.86    | NA | NA | NA | NA |
| 0.08  | 0.24  | -0.04 | 0.05  | 0.1   | 0.0014   | 0.16     | 0.044   | NA | NA | NA | NA |
| 0.04  | 0.1   | 0     | -0.04 | 0.1   | 0.00016  | 0.96     | 0.058   | NA | NA | NA | NA |
| 0.08  | 0.22  | -0.04 | 0.03  | 0.1   | 1.10E-08 | 0.0049   | 0.035   | NA | NA | NA | NA |
| 0.05  | 0.07  | 0     | 0.06  | 0.1   | 0.00036  | 0.86     | 0.00013 | NA | NA | NA | NA |
| 0.32  | 0.17  | -0.05 | 0.09  | 0.11  | 0.39     | 0.07     | 0.047   | NA | NA | NA | NA |
| 0.08  | 0.07  | -0.12 | -0.1  | 0.11  | 0.099    | 0.00011  | 0.02    | NA | NA | NA | NA |
| -0.14 | -0.08 | -0.02 | -0.05 | 0.11  | 0.25     | 0.47     | 0.082   | NA | NA | NA | NA |
| 0.06  | 0.05  | -0.04 | 0.04  | 0.11  | 0.025    | 0.002    | 0.021   | NA | NA | NA | NA |
| 0.06  | -0.01 | -0.07 | 0     | 0.11  | 0.93     | 2.70E-06 | 1       | NA | NA | NA | NA |
| 0.05  | 0     | -0.06 | 0.01  | 0.11  | 1        | 0.0016   | 0.75    | NA | NA | NA | NA |
| 0.38  | 0.01  | 0.04  | -0.02 | 0.11  | 1        | 0.44     | 0.55    | NA | NA | NA | NA |
| 0.04  | 0.07  | -0.06 | 0.02  | 0.11  | 0.0036   | 3.00E-06 | 0.082   | NA | NA | NA | NA |
| 0.03  | 0.04  | -0.01 | 0.01  | 0.11  | 0.0096   | 0.44     | 0.38    | NA | NA | NA | NA |
| 0.05  | 0.05  | -0.04 | 0.01  | 0.11  | 0.13     | 0.0058   | 0.72    | NA | NA | NA | NA |
| 0.07  | 0.01  | -0.02 | -0.06 | 0.12  | 0.93     | 0.41     | 0.017   | NA | NA | NA | NA |
| 0.08  | 0.02  | -0.04 | 0     | 0.12  | 0.62     | 0.014    | 1       | NA | NA | NA | NA |

|       |       |       |       |      |          |          |         |    |    |    |    |
|-------|-------|-------|-------|------|----------|----------|---------|----|----|----|----|
| 0.11  | 0.17  | 0.1   | 0.15  | 0.12 | 0.12     | 0.18     | 0.011   | NA | NA | NA | NA |
| -0.06 | -0.03 | -0.03 | 0.02  | 0.13 | 0.41     | 0.0068   | 0.13    | NA | NA | NA | NA |
| 0.15  | 0.05  | -0.08 | -0.05 | 0.13 | 0.33     | 0.0027   | 0.039   | NA | NA | NA | NA |
| 0.14  | 0.09  | -0.03 | 0.06  | 0.13 | 0.14     | 0.088    | 0.0035  | NA | NA | NA | NA |
| 0.1   | 0.05  | 0     | 0.03  | 0.13 | 0.29     | 0.94     | 0.12    | NA | NA | NA | NA |
| 0.07  | 0.09  | 0.01  | -0.04 | 0.13 | 0.083    | 0.69     | 0.14    | NA | NA | NA | NA |
| 0.05  | 0.1   | -0.05 | 0.07  | 0.14 | 0.00093  | 0.0028   | 0.00016 | NA | NA | NA | NA |
| 0.08  | -0.02 | -0.06 | 0     | 0.14 | 0.57     | 0.005    | 0.88    | NA | NA | NA | NA |
| -0.06 | -0.03 | -0.03 | 0     | 0.14 | 0.23     | 0.036    | 1       | NA | NA | NA | NA |
| 0.07  | -0.01 | -0.01 | 0.01  | 0.14 | 0.64     | 0.61     | 0.74    | NA | NA | NA | NA |
| 0.04  | 0.07  | -0.03 | -0.02 | 0.14 | 0.0034   | 0.027    | 0.18    | NA | NA | NA | NA |
| 0.08  | 0.16  | 0.02  | 0.01  | 0.14 | 0.0014   | 0.19     | 0.63    | NA | NA | NA | NA |
| 0.09  | 0.05  | -0.03 | 0.11  | 0.15 | 0.23     | 0.32     | 0.00089 | NA | NA | NA | NA |
| 0.25  | -0.03 | -0.08 | 0.04  | 0.15 | 0.97     | 1.10E-05 | 0.066   | NA | NA | NA | NA |
| 0.04  | 0.05  | 0.05  | -0.03 | 0.15 | 0.11     | 0.061    | 0.26    | NA | NA | NA | NA |
| 0.92  | 0.92  | -0.09 | 0.05  | 0.15 | 0.15     | 0.0047   | 0.13    | NA | NA | NA | NA |
| 0.09  | 0     | -0.09 | -0.03 | 0.15 | 1        | 0.002    | 0.26    | NA | NA | NA | NA |
| 0.92  | 0.19  | -0.01 | -0.03 | 0.15 | 0.015    | 0.94     | 0.8     | NA | NA | NA | NA |
| 0.1   | 0.02  | -0.03 | 0.01  | 0.16 | 0.79     | 0.11     | 0.76    | NA | NA | NA | NA |
| -0.05 | -0.02 | -0.03 | 0.01  | 0.16 | 0.61     | 0.17     | 0.82    | NA | NA | NA | NA |
| 0.05  | 0.08  | -0.02 | 0     | 0.16 | 0.0059   | 0.29     | 0.98    | NA | NA | NA | NA |
| 0.05  | 0.05  | -0.07 | 0     | 0.17 | 0.12     | 3.70E-06 | 0.85    | NA | NA | NA | NA |
| 0.06  | 0.04  | -0.02 | 0.01  | 0.17 | 0.28     | 0.18     | 0.39    | NA | NA | NA | NA |
| -0.04 | 0     | -0.03 | 0.05  | 0.17 | 1        | 0.0053   | 0.00035 | NA | NA | NA | NA |
| 0.07  | -0.06 | 0.03  | -0.02 | 0.18 | 0.054    | 0.14     | 0.27    | NA | NA | NA | NA |
| 0.06  | 0.19  | -0.03 | 0     | 0.18 | 9.10E-07 | 0.18     | 0.95    | NA | NA | NA | NA |
| 0.07  | 0.08  | -0.07 | 0     | 0.18 | 0.037    | 0.0021   | 0.95    | NA | NA | NA | NA |
| 0.18  | -0.16 | 0     | 0.03  | 0.18 | 0.12     | 1        | 0.56    | NA | NA | NA | NA |
| 0.07  | 0.11  | 0.01  | 0.04  | 0.18 | 0.0042   | 0.63     | 0.023   | NA | NA | NA | NA |
| 0.94  | 0.03  | -0.04 | -0.01 | 0.19 | 1        | 0.45     | 0.94    | NA | NA | NA | NA |

|       |       |       |       |      |          |          |          |    |    |    |    |
|-------|-------|-------|-------|------|----------|----------|----------|----|----|----|----|
| 0.05  | 0.12  | 0     | 0.07  | 0.19 | 1.90E-06 | 0.88     | 9.00E-05 | NA | NA | NA | NA |
| 0.04  | -0.03 | -0.04 | -0.04 | 0.21 | 0.33     | 0.012    | 0.013    | NA | NA | NA | NA |
| -0.04 | 0.02  | -0.01 | -0.02 | 0.21 | 0.75     | 0.43     | 0.34     | NA | NA | NA | NA |
| 0.07  | 0.13  | -0.02 | 0.07  | 0.21 | 0.12     | 0.34     | 0.00078  | NA | NA | NA | NA |
| -0.07 | -0.01 | 0.01  | 0.04  | 0.22 | 1        | 0.87     | 0.12     | NA | NA | NA | NA |
| 0.13  | 0.03  | -0.04 | 0.01  | 0.22 | 0.74     | 0.058    | 0.72     | NA | NA | NA | NA |
| 0.03  | 0.02  | -0.02 | 0     | 0.22 | 0.42     | 0.2      | 0.81     | NA | NA | NA | NA |
| 0.25  | 0.11  | 0.02  | 0.03  | 0.23 | 0.21     | 0.53     | 0.49     | NA | NA | NA | NA |
| 0.05  | 0.12  | -0.05 | -0.04 | 0.23 | 0.024    | 0.012    | 0.11     | NA | NA | NA | NA |
| 0.07  | 0.07  | 0.03  | 0     | 0.23 | 0.21     | 0.24     | 0.92     | NA | NA | NA | NA |
| -0.09 | -0.01 | -0.01 | 0.03  | 0.24 | 0.92     | 0.79     | 0.16     | NA | NA | NA | NA |
| 0.06  | 0.06  | 0.06  | 0     | 0.24 | 0.084    | 0.0092   | 0.87     | NA | NA | NA | NA |
| -0.09 | -0.14 | -0.03 | 0.04  | 0.24 | 0.006    | 0.28     | 0.15     | NA | NA | NA | NA |
| -0.06 | -0.04 | -0.04 | -0.05 | 0.26 | 0.29     | 0.25     | 0.064    | NA | NA | NA | NA |
| 0.24  | 0.24  | -0.07 | -0.05 | 0.26 | 0.0041   | 0.12     | 0.21     | NA | NA | NA | NA |
| 0.11  | 0.01  | -0.05 | -0.01 | 0.27 | 1        | 0.015    | 0.7      | NA | NA | NA | NA |
| -0.05 | 0.09  | -0.09 | -0.01 | 0.27 | 0.011    | 1.10E-08 | 0.65     | NA | NA | NA | NA |
| 0.08  | 0.07  | -0.04 | -0.01 | 0.27 | 0.31     | 0.046    | 0.83     | NA | NA | NA | NA |
| 0.06  | -0.08 | -0.03 | 0.03  | 0.27 | 0.028    | 0.13     | 0.19     | NA | NA | NA | NA |
| -0.11 | 0.02  | -0.07 | 0.04  | 0.27 | 0.91     | 0.23     | 0.58     | NA | NA | NA | NA |
| 0.06  | 0.15  | 0.06  | 0.07  | 0.27 | 0.1      | 0.038    | 0.05     | NA | NA | NA | NA |
| 0.42  | 0.36  | 0.4   | 0.18  | 0.27 | 0.16     | 0.13     | 0.22     | NA | NA | NA | NA |
| -0.05 | -0.03 | -0.02 | 0     | 0.27 | 0.52     | 0.27     | 0.97     | NA | NA | NA | NA |
| 0.23  | 0.17  | 0.21  | 0.37  | 0.28 | 0.47     | 0.08     | 0.0017   | NA | NA | NA | NA |
| 0.03  | 0     | -0.04 | 0     | 0.28 | 0.97     | 0.062    | 0.96     | NA | NA | NA | NA |
| 0.05  | -0.01 | -0.03 | -0.01 | 0.28 | 0.81     | 0.055    | 0.76     | NA | NA | NA | NA |
| 0.28  | 0.38  | 0     | 0.09  | 0.28 | 0.61     | 1        | 0.026    | NA | NA | NA | NA |
| -0.03 | -0.04 | -0.03 | 0.03  | 0.29 | 0.12     | 0.0041   | 0.012    | NA | NA | NA | NA |
| 0.03  | 0.07  | 0.01  | -0.05 | 0.29 | 0.0016   | 0.89     | 0.018    | NA | NA | NA | NA |
| -0.19 | -0.28 | -0.09 | -0.09 | 0.31 | 0.12     | 0.035    | 0.051    | NA | NA | NA | NA |

|       |       |       |       |      |         |          |          |    |    |    |    |
|-------|-------|-------|-------|------|---------|----------|----------|----|----|----|----|
| 0.05  | 0.08  | -0.04 | 0     | 0.31 | 0.012   | 0.0088   | 0.9      | NA | NA | NA | NA |
| 0.11  | 0.13  | -0.07 | 0.02  | 0.31 | 0.019   | 0.0079   | 0.63     | NA | NA | NA | NA |
| 0.03  | 0.05  | -0.02 | 0     | 0.32 | 0.053   | 0.22     | 1        | NA | NA | NA | NA |
| 0.08  | 0     | -0.06 | -0.04 | 0.32 | 1       | 0.017    | 0.12     | NA | NA | NA | NA |
| 0.03  | 0.07  | -0.03 | 0.02  | 0.33 | 0.0054  | 0.039    | 0.17     | NA | NA | NA | NA |
| 0.07  | -0.08 | -0.05 | -0.03 | 0.33 | 0.36    | 0.011    | 0.26     | NA | NA | NA | NA |
| 0.13  | 0.02  | -0.01 | 0.04  | 0.33 | 0.8     | 0.8      | 0.24     | NA | NA | NA | NA |
| 0.04  | -0.01 | -0.04 | -0.04 | 0.34 | 0.98    | 0.11     | 0.061    | NA | NA | NA | NA |
| 0.02  | 0     | -0.03 | 0.02  | 0.34 | 1       | 0.0086   | 0.15     | NA | NA | NA | NA |
| -0.03 | -0.01 | 0     | 0.04  | 0.34 | 0.72    | 0.98     | 0.051    | NA | NA | NA | NA |
| 0.07  | 0.06  | -0.04 | -0.01 | 0.34 | 0.26    | 0.045    | 0.73     | NA | NA | NA | NA |
| 0.04  | 0.13  | -0.06 | 0     | 0.35 | 0.00021 | 4.70E-07 | 1        | NA | NA | NA | NA |
| 0.03  | 0.01  | -0.05 | -0.01 | 0.36 | 0.8     | 0.0012   | 0.79     | NA | NA | NA | NA |
| 0.06  | 0.08  | -0.02 | -0.03 | 0.36 | 0.033   | 0.4      | 0.11     | NA | NA | NA | NA |
| 0.17  | 0.04  | 0.01  | 0.08  | 0.36 | 0.83    | 0.62     | 0.011    | NA | NA | NA | NA |
| 0.08  | 0.04  | -0.04 | 0     | 0.36 | 0.41    | 0.012    | 0.98     | NA | NA | NA | NA |
| 0.05  | -0.02 | -0.09 | -0.03 | 0.37 | 0.74    | 2.70E-05 | 0.14     | NA | NA | NA | NA |
| 0.04  | 0     | -0.05 | -0.01 | 0.37 | 1       | 0.0029   | 0.84     | NA | NA | NA | NA |
| 0.14  | 0.34  | -0.07 | -0.02 | 0.37 | 0.00087 | 0.0031   | 0.43     | NA | NA | NA | NA |
| -0.04 | -0.04 | -0.05 | -0.01 | 0.37 | 0.43    | 0.0081   | 0.85     | NA | NA | NA | NA |
| 0.3   | 0.23  | -0.07 | 0.03  | 0.38 | 0.13    | 0.049    | 0.74     | NA | NA | NA | NA |
| -0.07 | 0.15  | -0.05 | 0.05  | 0.38 | 0.23    | 0.2      | 0.26     | NA | NA | NA | NA |
| 0.06  | 0.04  | 0.04  | 0.11  | 0.38 | 0.53    | 0.18     | 0.00088  | NA | NA | NA | NA |
| -0.03 | 0.09  | 0.06  | 0.05  | 0.39 | 0.048   | 0.014    | 0.05     | NA | NA | NA | NA |
| 0.06  | -0.01 | 0     | 0.3   | 0.39 | 0.99    | 1        | 1.10E-07 | NA | NA | NA | NA |
| 0.08  | 0.02  | 0.08  | 0.09  | 0.39 | 0.82    | 0.025    | 0.0064   | NA | NA | NA | NA |
| 0.04  | 0.11  | -0.06 | 0.01  | 0.39 | 0.019   | 0.026    | 0.84     | NA | NA | NA | NA |
| 0.03  | 0.02  | -0.03 | 0.02  | 0.4  | 0.43    | 0.07     | 0.31     | NA | NA | NA | NA |
| 0.02  | 0.02  | -0.06 | 0.01  | 0.4  | 0.36    | 4.30E-07 | 0.34     | NA | NA | NA | NA |
| 0.03  | 0.02  | -0.06 | -0.04 | 0.41 | 0.37    | 2.30E-05 | 0.034    | NA | NA | NA | NA |



|       |       |       |       |      |          |          |          |    |    |    |    |
|-------|-------|-------|-------|------|----------|----------|----------|----|----|----|----|
| 0.03  | -0.01 | -0.01 | 0.03  | 0.41 | 0.84     | 0.59     | 0.076    | NA | NA | NA | NA |
| -0.17 | -0.06 | -0.17 | 0.01  | 0.41 | 0.88     | 5.00E-04 | 1        | NA | NA | NA | NA |
| 0.15  | 0.93  | 0.01  | 0.1   | 0.42 | 1.00E-04 | 0.76     | 0.00023  | NA | NA | NA | NA |
| 0.03  | 0.1   | -0.04 | 0.05  | 0.42 | 7.60E-06 | 0.02     | 0.0092   | NA | NA | NA | NA |
| 0.11  | 0.14  | 0.02  | -0.01 | 0.43 | 0.28     | 0.95     | 1        | NA | NA | NA | NA |
| 0.16  | 0     | -0.05 | 0.01  | 0.43 | 1        | 0.15     | 0.89     | NA | NA | NA | NA |
| 0.89  | 0.89  | -0.02 | 0.07  | 0.43 | 0.094    | 0.9      | 0.47     | NA | NA | NA | NA |
| -0.04 | 0     | -0.14 | -0.04 | 0.43 | 1        | 3.10E-05 | 0.4      | NA | NA | NA | NA |
| 0.86  | 0.1   | 0.02  | 0.03  | 0.44 | 0.79     | 0.69     | 0.34     | NA | NA | NA | NA |
| 0.05  | 0.06  | -0.02 | 0.09  | 0.44 | 0.04     | 0.19     | 8.30E-05 | NA | NA | NA | NA |
| 0.04  | 0.11  | -0.02 | -0.01 | 0.44 | 5.50E-05 | 0.38     | 0.59     | NA | NA | NA | NA |
| 0.04  | 0.07  | -0.05 | 0     | 0.44 | 0.078    | 0.00031  | 1        | NA | NA | NA | NA |
| 0.04  | 0.03  | -0.04 | 0.01  | 0.44 | 0.85     | 0.018    | 0.57     | NA | NA | NA | NA |
| 0.02  | -0.04 | -0.03 | 0.01  | 0.44 | 0.073    | 0.23     | 0.71     | NA | NA | NA | NA |
| 0.04  | 0.1   | -0.01 | -0.02 | 0.45 | 0.067    | 0.61     | 0.56     | NA | NA | NA | NA |
| 0.08  | 0.18  | -0.11 | -0.08 | 0.45 | 0.089    | 0.00032  | 0.0054   | NA | NA | NA | NA |
| 0.03  | 0.11  | 0.02  | 0.02  | 0.45 | 0.0063   | 0.33     | 0.28     | NA | NA | NA | NA |
| -0.05 | -0.04 | -0.07 | -0.02 | 0.46 | 0.65     | 0.065    | 0.43     | NA | NA | NA | NA |
| -0.04 | 0.15  | -0.04 | -0.01 | 0.46 | 7.00E-04 | 0.032    | 0.54     | NA | NA | NA | NA |
| 0.03  | 0.05  | 0.04  | 0.02  | 0.46 | 0.34     | 0.0076   | 0.16     | NA | NA | NA | NA |
| 0.41  | -0.04 | -0.1  | -0.05 | 0.46 | 0.071    | 3.50E-05 | 0.06     | NA | NA | NA | NA |
| 0.09  | -0.03 | -0.12 | -0.07 | 0.47 | 0.77     | 0.013    | 0.18     | NA | NA | NA | NA |
| 0.06  | 0.04  | 0.01  | 0.09  | 0.47 | 0.59     | 0.59     | 0.00019  | NA | NA | NA | NA |
| -0.1  | 0.14  | 0.01  | 0.15  | 0.47 | 0.31     | 0.75     | 2.30E-07 | NA | NA | NA | NA |
| 0.1   | 0.42  | -0.1  | 0.03  | 0.47 | 0.00023  | 0.002    | 0.48     | NA | NA | NA | NA |
| -0.04 | 0.01  | -0.03 | 0     | 0.47 | 0.88     | 0.21     | 0.98     | NA | NA | NA | NA |
| -0.11 | -0.05 | -0.03 | -0.01 | 0.48 | 0.82     | 0.42     | 0.73     | NA | NA | NA | NA |
| 0.4   | -0.03 | 0.01  | -0.02 | 0.48 | 0.58     | 0.78     | 0.28     | NA | NA | NA | NA |
| 0.03  | 0.05  | -0.02 | 0.04  | 0.48 | 0.087    | 0.33     | 0.013    | NA | NA | NA | NA |
| 0.02  | 0.05  | -0.05 | 0.03  | 0.48 | 0.029    | 0.0011   | 0.13     | NA | NA | NA | NA |

|       |       |       |       |      |         |          |          |    |    |    |    |
|-------|-------|-------|-------|------|---------|----------|----------|----|----|----|----|
| -0.15 | 0.66  | -0.03 | 0.01  | 0.48 | 0.23    | 0.16     | 0.79     | NA | NA | NA | NA |
| 0.05  | 0.05  | 0.02  | 0.09  | 0.48 | 0.45    | 0.54     | 0.0062   | NA | NA | NA | NA |
| 0.04  | 0.03  | -0.01 | 0.14  | 0.48 | 0.76    | 0.9      | 6.20E-06 | NA | NA | NA | NA |
| -0.06 | -0.01 | 0.08  | 0.14  | 0.49 | 0.97    | 0.0081   | 1.90E-05 | NA | NA | NA | NA |
| -0.02 | -0.05 | -0.02 | 0.02  | 0.49 | 0.018   | 0.093    | 0.13     | NA | NA | NA | NA |
| 0.17  | 0.07  | -0.08 | 0.04  | 0.49 | 0.3     | 0.00031  | 0.21     | NA | NA | NA | NA |
| -0.12 | NA    | -0.07 | -0.09 | 0.49 | NA      | 0.009    | 0.00043  | NA | NA | NA | NA |
| 0.02  | 0.07  | -0.04 | -0.01 | 0.49 | 0.00064 | 6.00E-04 | 0.7      | NA | NA | NA | NA |
| 0.03  | 0.02  | -0.08 | 0.05  | 0.5  | 0.65    | 2.00E-05 | 0.037    | NA | NA | NA | NA |
| -0.07 | -0.02 | -0.01 | 0.03  | 0.5  | 0.97    | 0.87     | 0.37     | NA | NA | NA | NA |
| 0.08  | 0.03  | -0.04 | -0.01 | 0.5  | 0.38    | 0.048    | 0.43     | NA | NA | NA | NA |
| 0.04  | 0.07  | -0.01 | 0.12  | 0.5  | 0.14    | 0.85     | 0.00098  | NA | NA | NA | NA |
| -0.1  | -0.09 | -0.07 | -0.03 | 0.5  | 0.39    | 0.037    | 0.72     | NA | NA | NA | NA |
| -0.04 | 0.17  | 0.01  | 0.09  | 0.5  | 0.027   | 0.76     | 5.00E-06 | NA | NA | NA | NA |
| 0.08  | 0.12  | -0.08 | -0.06 | 0.51 | 0.01    | 0.00086  | 0.017    | NA | NA | NA | NA |
| -0.07 | 0.34  | -0.05 | -0.05 | 0.51 | 0.00077 | 0.12     | 0.1      | NA | NA | NA | NA |
| -0.03 | 0.05  | -0.04 | -0.06 | 0.51 | 0.22    | 0.47     | 0.11     | NA | NA | NA | NA |
| -0.03 | 0     | -0.06 | -0.02 | 0.51 | 0.98    | 0.03     | 0.57     | NA | NA | NA | NA |
| 0.04  | 0.02  | -0.03 | -0.02 | 0.51 | 0.73    | 0.27     | 0.47     | NA | NA | NA | NA |
| -0.02 | 0.05  | -0.05 | 0.05  | 0.52 | 0.15    | 0.00032  | 0.0077   | NA | NA | NA | NA |
| 0.02  | -0.01 | -0.04 | -0.01 | 0.52 | 0.54    | 0.003    | 0.73     | NA | NA | NA | NA |
| 0.02  | 0     | -0.04 | -0.01 | 0.52 | 0.98    | 0.05     | 0.74     | NA | NA | NA | NA |
| 0.04  | 0.07  | 0.09  | -0.06 | 0.52 | 0.068   | 0.0095   | 0.025    | NA | NA | NA | NA |
| 0.05  | 0.16  | -0.13 | 0.03  | 0.53 | 0.0049  | 5.20E-06 | 0.43     | NA | NA | NA | NA |
| 0.12  | -0.01 | 0.05  | 0.09  | 0.53 | 0.87    | 0.13     | 0.027    | NA | NA | NA | NA |
| 0.03  | 0.02  | -0.02 | 0.09  | 0.54 | 0.48    | 0.65     | 0.0015   | NA | NA | NA | NA |
| 0.39  | -0.01 | -0.07 | -0.11 | 0.54 | 1       | 0.12     | 0.015    | NA | NA | NA | NA |
| 0.01  | -0.01 | -0.07 | -0.04 | 0.54 | 0.74    | 2.10E-05 | 0.013    | NA | NA | NA | NA |
| 0.06  | 0.08  | 0     | -0.02 | 0.55 | 0.46    | 0.94     | 0.65     | NA | NA | NA | NA |
| 0.07  | -0.05 | -0.04 | -0.04 | 0.56 | 0.54    | 0.098    | 0.17     | NA | NA | NA | NA |

|       |       |       |       |      |          |          |         |    |    |    |    |
|-------|-------|-------|-------|------|----------|----------|---------|----|----|----|----|
| 0.05  | 0.07  | -0.05 | -0.05 | 0.56 | 0.43     | 0.0052   | 0.0076  | NA | NA | NA | NA |
| 0.22  | 0.39  | -0.06 | 0     | 0.57 | 0.11     | 0.047    | 1       | NA | NA | NA | NA |
| -0.05 | -0.03 | -0.2  | -0.07 | 0.57 | 0.73     | 5.90E-09 | 0.048   | NA | NA | NA | NA |
| 0.39  | 0.28  | 0.1   | -0.01 | 0.58 | 0.019    | 0.15     | 1       | NA | NA | NA | NA |
| 0.02  | 0.02  | -0.02 | 0.05  | 0.58 | 0.5      | 0.082    | 0.00012 | NA | NA | NA | NA |
| -0.08 | 0.1   | 0.04  | 0.08  | 0.58 | 0.4      | 0.049    | 0.00019 | NA | NA | NA | NA |
| -0.03 | -0.04 | 0     | 0.01  | 0.58 | 0.29     | 1        | 0.92    | NA | NA | NA | NA |
| 0.03  | 0.08  | -0.06 | 0.03  | 0.58 | 0.063    | 0.00087  | 0.14    | NA | NA | NA | NA |
| 0.07  | 0.03  | 0.01  | 0.05  | 0.58 | 0.68     | 0.83     | 0.11    | NA | NA | NA | NA |
| 0.08  | 0.02  | -0.21 | -0.15 | 0.59 | 0.74     | 6.60E-06 | 0.00016 | NA | NA | NA | NA |
| 0.03  | 0.1   | 0     | 0.03  | 0.59 | 0.023    | 1        | 0.3     | NA | NA | NA | NA |
| 0.02  | 0.01  | -0.13 | -0.1  | 0.59 | 1        | 1.50E-06 | 0.02    | NA | NA | NA | NA |
| 0.09  | 0.03  | -0.03 | 0.03  | 0.6  | 1        | 0.4      | 0.49    | NA | NA | NA | NA |
| 0.08  | NA    | 0.04  | 0.03  | 0.6  | NA       | 0.42     | 0.62    | NA | NA | NA | NA |
| -0.01 | 0.09  | -0.03 | 0.03  | 0.61 | 0.00045  | 0.047    | 0.04    | NA | NA | NA | NA |
| 0.14  | 0.24  | -0.13 | -0.07 | 0.61 | 0.65     | 0.077    | 0.37    | NA | NA | NA | NA |
| -0.09 | 0.49  | -0.04 | -0.04 | 0.62 | 0.0097   | 0.28     | 0.25    | NA | NA | NA | NA |
| 0.12  | 0.14  | 0.01  | 0.02  | 0.64 | 0.018    | 0.79     | 0.47    | NA | NA | NA | NA |
| 0.02  | -0.04 | 0     | 0.03  | 0.64 | 0.06     | 1        | 0.16    | NA | NA | NA | NA |
| 0.06  | 0.48  | -0.02 | 0.08  | 0.65 | 3.00E-08 | 0.42     | 0.00051 | NA | NA | NA | NA |
| -0.04 | 0.04  | -0.01 | 0.07  | 0.66 | 0.46     | 0.76     | 0.00021 | NA | NA | NA | NA |
| 0.03  | -0.04 | -0.06 | 0.05  | 0.66 | 0.6      | 0.19     | 0.26    | NA | NA | NA | NA |
| -0.01 | 0.09  | -0.01 | -0.02 | 0.66 | 0.0055   | 0.45     | 0.34    | NA | NA | NA | NA |
| -0.02 | 0.05  | -0.02 | 0.04  | 0.67 | 0.57     | 0.3      | 0.078   | NA | NA | NA | NA |
| 0.06  | 0.05  | 0     | -0.06 | 0.67 | 0.59     | 1        | 0.4     | NA | NA | NA | NA |
| 0.05  | -0.04 | -0.13 | -0.01 | 0.67 | 0.83     | 9.70E-05 | 0.87    | NA | NA | NA | NA |
| 0.04  | 0.24  | -0.06 | 0     | 0.67 | 1.00E-06 | 0.0038   | 1       | NA | NA | NA | NA |
| 0.03  | 0.21  | -0.01 | 0.04  | 0.67 | 6.60E-05 | 0.61     | 0.091   | NA | NA | NA | NA |
| 0.04  | 0.04  | -0.04 | 0     | 0.68 | 0.53     | 0.029    | 0.96    | NA | NA | NA | NA |
| 0.01  | 0.04  | 0     | 0.01  | 0.68 | 0.067    | 0.93     | 0.34    | NA | NA | NA | NA |

|       |       |       |       |      |        |          |          |    |    |    |    |
|-------|-------|-------|-------|------|--------|----------|----------|----|----|----|----|
| -0.02 | -0.07 | -0.04 | -0.04 | 0.68 | 0.019  | 0.01     | 0.035    | NA | NA | NA | NA |
| 0.03  | 0.02  | -0.02 | 0.01  | 0.69 | 0.88   | 0.36     | 0.86     | NA | NA | NA | NA |
| 0.12  | -0.06 | -0.01 | 0.16  | 0.69 | 0.46   | 0.83     | 4.70E-06 | NA | NA | NA | NA |
| -0.03 | -0.04 | -0.06 | -0.02 | 0.69 | 0.17   | 2.60E-06 | 0.2      | NA | NA | NA | NA |
| -0.03 | 0.05  | 0.01  | 0.05  | 0.69 | 0.31   | 0.78     | 0.0079   | NA | NA | NA | NA |
| -0.02 | 0.02  | 0     | 0.08  | 0.7  | 0.84   | 0.97     | 0.0063   | NA | NA | NA | NA |
| 0.02  | 0.15  | 0.04  | 0.07  | 0.7  | 0.12   | 0.18     | 0.034    | NA | NA | NA | NA |
| 0.03  | 0.02  | 0.03  | -0.02 | 0.7  | 0.37   | 0.38     | 0.29     | NA | NA | NA | NA |
| -0.03 | 0.01  | 0     | -0.02 | 0.71 | 0.78   | 1        | 0.22     | NA | NA | NA | NA |
| 0.04  | -0.11 | -0.03 | 0.04  | 0.71 | 0.069  | 0.28     | 0.12     | NA | NA | NA | NA |
| 0.35  | 0.06  | -0.04 | 0.03  | 0.72 | 0.49   | 0.47     | 0.74     | NA | NA | NA | NA |
| 0.01  | 0.05  | -0.02 | 0.01  | 0.72 | 0.064  | 0.029    | 0.3      | NA | NA | NA | NA |
| 0.19  | 0.05  | -0.12 | -0.08 | 0.72 | 0.48   | 0.0022   | 0.015    | NA | NA | NA | NA |
| 0.05  | 0.11  | -0.08 | 0     | 0.73 | 0.018  | 1.50E-05 | 0.97     | NA | NA | NA | NA |
| -0.03 | 0.03  | -0.04 | 0.01  | 0.74 | 0.84   | 0.5      | 0.79     | NA | NA | NA | NA |
| -0.02 | 0.02  | -0.02 | 0.04  | 0.74 | 0.69   | 0.39     | 0.017    | NA | NA | NA | NA |
| 0.01  | 0.08  | -0.05 | 0     | 0.74 | 0.0029 | 0.0018   | 0.91     | NA | NA | NA | NA |
| -0.01 | 0.01  | -0.01 | -0.01 | 0.74 | 0.76   | 0.59     | 0.69     | NA | NA | NA | NA |
| 0.01  | 0.03  | 0     | 0.03  | 0.76 | 0.21   | 1        | 0.26     | NA | NA | NA | NA |
| -0.15 | -0.18 | -0.09 | -0.02 | 0.77 | 0.39   | 0.00089  | 0.72     | NA | NA | NA | NA |
| -0.1  | -0.18 | 0.02  | 0.06  | 0.78 | 0.029  | 0.64     | 0.028    | NA | NA | NA | NA |
| -0.03 | -0.01 | -0.08 | -0.01 | 0.78 | 0.99   | 7.30E-06 | 0.6      | NA | NA | NA | NA |
| -0.06 | 0.07  | -0.08 | -0.01 | 0.79 | 0.5    | 0.023    | 0.73     | NA | NA | NA | NA |
| -0.07 | -0.09 | -0.01 | 0.04  | 0.79 | 0.53   | 0.63     | 0.26     | NA | NA | NA | NA |
| 0.01  | 0.05  | -0.04 | 0.01  | 0.79 | 0.056  | 0.0069   | 0.52     | NA | NA | NA | NA |
| -0.03 | -0.01 | -0.07 | 0.03  | 0.8  | 1      | 0.0028   | 0.29     | NA | NA | NA | NA |
| 0.06  | -0.04 | -0.08 | -0.03 | 0.8  | 0.92   | 0.0037   | 0.3      | NA | NA | NA | NA |
| 0.01  | 0.04  | -0.06 | 0     | 0.81 | 0.099  | 0.00037  | 0.93     | NA | NA | NA | NA |
| 0.03  | 0.24  | -0.04 | 0     | 0.81 | 0.034  | 0.091    | 0.96     | NA | NA | NA | NA |
| 0.06  | 0.16  | -0.06 | 0.01  | 0.81 | 0.12   | 0.0029   | 0.84     | NA | NA | NA | NA |

|       |       |       |       |      |          |          |          |    |    |    |    |
|-------|-------|-------|-------|------|----------|----------|----------|----|----|----|----|
| -0.01 | 0.05  | -0.04 | -0.03 | 0.82 | 0.0013   | 5.60E-05 | 0.017    | NA | NA | NA | NA |
| -0.02 | -0.01 | -0.02 | 0.03  | 0.83 | 0.85     | 0.41     | 0.19     | NA | NA | NA | NA |
| -0.02 | 0     | 0     | 0.05  | 0.83 | 1        | 1        | 0.02     | NA | NA | NA | NA |
| 0.02  | 0.15  | -0.02 | 0.07  | 0.83 | 0.006    | 0.2      | 0.00071  | NA | NA | NA | NA |
| 0.05  | 0.25  | 0.02  | 0.01  | 0.84 | 0.0038   | 0.42     | 0.89     | NA | NA | NA | NA |
| -0.02 | 0.06  | -0.02 | -0.02 | 0.84 | 0.47     | 0.48     | 0.38     | NA | NA | NA | NA |
| -0.01 | 0.05  | -0.02 | -0.01 | 0.84 | 0.23     | 0.27     | 0.75     | NA | NA | NA | NA |
| -0.04 | 0     | -0.04 | 0.04  | 0.84 | 1        | 0.029    | 0.033    | NA | NA | NA | NA |
| 0.09  | 0.05  | -0.02 | -0.01 | 0.85 | 0.52     | 0.58     | 0.98     | NA | NA | NA | NA |
| 0.21  | 0.45  | 0.05  | -0.04 | 0.86 | 1.50E-06 | 0.43     | 0.48     | NA | NA | NA | NA |
| -0.06 | -0.03 | -0.09 | -0.03 | 0.86 | 0.9      | 0.0078   | 0.66     | NA | NA | NA | NA |
| 0     | 0.05  | 0.02  | 0.05  | 0.86 | 0.0027   | 0.32     | 0.00012  | NA | NA | NA | NA |
| -0.01 | 0.04  | 0     | 0.04  | 0.86 | 0.4      | 0.85     | 0.014    | NA | NA | NA | NA |
| 0.04  | 0.02  | 0     | 0.07  | 0.86 | 1        | 1        | 0.015    | NA | NA | NA | NA |
| 0.02  | 0.02  | -0.05 | -0.04 | 0.87 | 0.72     | 0.038    | 0.046    | NA | NA | NA | NA |
| -0.05 | NA    | -0.23 | -0.31 | 0.87 | NA       | 1.00E-05 | 0.00016  | NA | NA | NA | NA |
| 0.04  | 0.08  | 0.09  | 0.1   | 0.88 | 0.49     | 0.0014   | 0.0012   | NA | NA | NA | NA |
| -0.01 | -0.04 | -0.05 | -0.04 | 0.88 | 0.28     | 0.04     | 0.14     | NA | NA | NA | NA |
| -0.04 | 0.09  | -0.04 | 0.06  | 0.89 | 0.16     | 0.022    | 0.0051   | NA | NA | NA | NA |
| 0.13  | 0.05  | 0     | 0.08  | 0.89 | 0.39     | 1        | 0.45     | NA | NA | NA | NA |
| 0.05  | 0     | -0.09 | -0.13 | 0.89 | 1        | 5.00E-04 | 3.40E-06 | NA | NA | NA | NA |
| -0.16 | -0.03 | -0.02 | -0.05 | 0.89 | 1        | 0.61     | 0.18     | NA | NA | NA | NA |
| -0.03 | 0.01  | -0.02 | 0.02  | 0.89 | 1        | 0.8      | 0.81     | NA | NA | NA | NA |
| -0.02 | 0.08  | -0.12 | -0.03 | 0.89 | 0.26     | 4.90E-05 | 0.31     | NA | NA | NA | NA |
| 0.03  | 0.03  | 0     | 0.09  | 0.89 | 0.55     | 0.93     | 2.40E-06 | NA | NA | NA | NA |
| -0.06 | NA    | -0.16 | NA    | 0.9  | NA       | 0.04     | NA       | NA | NA | NA | NA |
| 0.03  | 0.14  | -0.09 | 0.06  | 0.9  | 0.48     | 0.027    | 0.24     | NA | NA | NA | NA |
| -0.01 | -0.01 | 0.02  | 0     | 0.9  | 0.84     | 0.35     | 0.97     | NA | NA | NA | NA |
| -0.03 | 0.13  | 0.04  | 0.07  | 0.9  | 0.042    | 0.14     | 0.029    | NA | NA | NA | NA |
| 0.08  | NA    | 0.09  | -0.05 | 0.9  | NA       | 0.1      | 0.33     | NA | NA | NA | NA |

|       |       |       |       |      |          |          |          |    |    |    |    |
|-------|-------|-------|-------|------|----------|----------|----------|----|----|----|----|
| 0.02  | 0.09  | 0.01  | 0.04  | 0.91 | 0.19     | 0.62     | 0.042    | NA | NA | NA | NA |
| -0.01 | 0.01  | 0.01  | 0.01  | 0.91 | 0.61     | 0.7      | 0.52     | NA | NA | NA | NA |
| 0.01  | -0.01 | -0.04 | 0     | 0.91 | 0.84     | 0.0034   | 1        | NA | NA | NA | NA |
| 0.01  | 0.02  | -0.05 | -0.03 | 0.91 | 0.55     | 0.14     | 0.3      | NA | NA | NA | NA |
| 0.01  | 0.03  | -0.02 | 0     | 0.91 | 0.27     | 0.08     | 1        | NA | NA | NA | NA |
| -0.03 | -0.07 | -0.04 | 0.03  | 0.91 | 0.37     | 0.1      | 0.42     | NA | NA | NA | NA |
| -0.09 | -0.39 | 0.07  | -0.01 | 0.93 | 1.40E-06 | 0.26     | 0.77     | NA | NA | NA | NA |
| 0.02  | 0.05  | 0.03  | 0.15  | 0.93 | 0.2      | 0.27     | 2.70E-09 | NA | NA | NA | NA |
| -0.01 | 0.02  | 0     | 0.02  | 0.93 | 0.59     | 1        | 0.29     | NA | NA | NA | NA |
| 0.06  | 0.02  | -0.12 | -0.06 | 0.94 | 0.95     | 0.01     | 0.32     | NA | NA | NA | NA |
| 0.01  | 0.03  | -0.03 | -0.03 | 0.94 | 0.48     | 0.32     | 0.19     | NA | NA | NA | NA |
| -0.03 | -0.01 | 0     | 0     | 0.94 | 1        | 1        | 0.98     | NA | NA | NA | NA |
| 0.01  | 0.03  | -0.01 | 0.07  | 0.94 | 0.57     | 0.73     | 0.00032  | NA | NA | NA | NA |
| 0.01  | -0.02 | -0.03 | 0.03  | 0.94 | 0.17     | 0.0063   | 0.0062   | NA | NA | NA | NA |
| 0.05  | -0.07 | 0     | 0.1   | 0.95 | 0.67     | 1        | 0.12     | NA | NA | NA | NA |
| -0.02 | -0.02 | -0.09 | -0.01 | 0.95 | 0.87     | 4.80E-05 | 0.78     | NA | NA | NA | NA |
| 0.06  | 0     | -0.03 | -0.02 | 0.95 | 1        | 0.23     | 0.56     | NA | NA | NA | NA |
| 0.04  | 0.09  | 0.03  | 0.09  | 0.95 | 0.45     | 0.39     | 0.033    | NA | NA | NA | NA |
| -0.01 | 0     | 0.01  | 0.05  | 0.95 | 1        | 0.54     | 0.001    | NA | NA | NA | NA |
| -0.12 | 0.17  | -0.08 | 0.09  | 0.96 | 1        | 0.11     | 0.17     | NA | NA | NA | NA |
| 0.01  | 0.04  | 0.01  | 0.02  | 0.96 | 0.37     | 0.84     | 0.44     | NA | NA | NA | NA |
| -0.01 | 0.06  | -0.02 | -0.03 | 0.96 | 0.19     | 0.37     | 0.25     | NA | NA | NA | NA |
| 0.02  | -0.05 | 0     | 0.03  | 0.97 | 0.7      | 0.94     | 0.092    | NA | NA | NA | NA |
| -0.01 | 0.07  | -0.01 | 0.05  | 0.97 | 0.046    | 0.45     | 0.023    | NA | NA | NA | NA |
| 0     | -0.03 | -0.06 | -0.03 | 0.97 | 0.11     | 1.70E-07 | 0.027    | NA | NA | NA | NA |
| -0.01 | 0.13  | -0.02 | 0.06  | 0.97 | 0.0097   | 0.59     | 0.068    | NA | NA | NA | NA |
| 0.01  | 0.02  | -0.1  | -0.02 | 0.97 | 0.65     | 8.10E-06 | 0.46     | NA | NA | NA | NA |
| 0.01  | -0.07 | -0.02 | 0.12  | 0.98 | 0.081    | 0.6      | 0.00065  | NA | NA | NA | NA |
| -0.02 | -0.08 | -0.05 | 0.06  | 0.98 | 0.36     | 0.029    | 0.023    | NA | NA | NA | NA |
| -0.02 | -0.15 | -0.2  | -0.29 | 0.98 | 0.012    | 2.10E-05 | 1.00E-08 | NA | NA | NA | NA |

|       |       |       |       |      |          |          |          |    |    |    |    |
|-------|-------|-------|-------|------|----------|----------|----------|----|----|----|----|
| -0.1  | 0.02  | -0.1  | 0.41  | 0.98 | 1        | 0.34     | 0.027    | NA | NA | NA | NA |
| -0.01 | 0.07  | -0.04 | -0.04 | 0.98 | 0.099    | 0.06     | 0.085    | NA | NA | NA | NA |
| 0     | 0.04  | -0.07 | 0.03  | 0.98 | 0.13     | 3.10E-05 | 0.11     | NA | NA | NA | NA |
| -0.01 | -0.01 | 0.01  | 0.01  | 0.99 | 0.87     | 0.83     | 0.8      | NA | NA | NA | NA |
| -0.01 | 0.15  | 0.01  | 0.07  | 0.99 | 0.01     | 0.77     | 0.0049   | NA | NA | NA | NA |
| 0.06  | 0.54  | 0.89  | 0.76  | 0.99 | 0.0084   | 3.70E-05 | 1.70E-05 | NA | NA | NA | NA |
| 0.01  | 0     | -0.01 | 0.14  | 1    | 0.92     | 0.59     | 3.00E-06 | NA | NA | NA | NA |
| 0.01  | 0.01  | 0     | 0.02  | 1    | 1        | 1        | 0.48     | NA | NA | NA | NA |
| 0.06  | 0.17  | -0.13 | -0.05 | 1    | 1        | 2.90E-05 | 0.18     | NA | NA | NA | NA |
| 0.05  | 0.32  | -0.06 | 0.04  | 1    | 8.10E-05 | 0.012    | 0.22     | NA | NA | NA | NA |
| 0     | 0.07  | -0.04 | 0.06  | 1    | 0.099    | 0.035    | 0.0024   | NA | NA | NA | NA |
| 0.03  | 0.06  | 0.01  | 0.22  | 1    | 0.48     | 0.94     | 7.60E-06 | NA | NA | NA | NA |
| -0.01 | 0.09  | -0.09 | 0.09  | 1    | 0.12     | 0.0018   | 0.026    | NA | NA | NA | NA |
| 0.05  | -0.05 | -0.1  | -0.14 | 1    | 0.79     | 0.019    | 0.0041   | NA | NA | NA | NA |
| -0.03 | 0     | -0.04 | 0.05  | 1    | 1        | 0.24     | 0.2      | NA | NA | NA | NA |
| 0.05  | -0.03 | -0.06 | -0.03 | 1    | 1        | 0.013    | 0.26     | NA | NA | NA | NA |
| 0     | NA    | NA    | NA    | 1    | NA       | NA       | NA       | NA | NA | NA | NA |
| 0.01  | -0.03 | 0.03  | 0     | 1    | 0.48     | 0.093    | 1        | NA | NA | NA | NA |
| 0     | 0.19  | -0.05 | -0.01 | 1    | 0.14     | 0.075    | 0.82     | NA | NA | NA | NA |
| 0.03  | 0.02  | -0.12 | 0     | 1    | 0.81     | 0.021    | 1        | NA | NA | NA | NA |
| 0.01  | -0.06 | 0     | 0.08  | 1    | 0.25     | 0.98     | 0.026    | NA | NA | NA | NA |
| 0     | 0.03  | -0.13 | -0.02 | 1    | 0.72     | 0.0017   | 0.67     | NA | NA | NA | NA |
| -0.02 | -0.07 | 0.01  | -0.01 | 1    | 1        | 0.82     | 0.79     | NA | NA | NA | NA |
| -0.04 | -0.02 | -0.1  | 0.04  | 1    | 0.99     | 0.01     | 0.55     | NA | NA | NA | NA |
| 0     | 0.34  | -0.05 | -0.03 | 1    | 2.30E-07 | 0.0058   | 0.13     | NA | NA | NA | NA |
| -0.01 | 0.11  | -0.07 | 0.03  | 1    | 0.0078   | 0.0013   | 0.25     | NA | NA | NA | NA |
| 0     | NA    | 0.05  | 0.12  | 1    | NA       | 0.31     | 0.017    | NA | NA | NA | NA |
| 0.01  | 0.1   | -0.14 | -0.12 | 1    | 0.2      | 2.10E-05 | 3.30E-05 | NA | NA | NA | NA |
| -0.01 | 0.55  | 0.02  | 0.06  | 1    | 1.10E-05 | 0.61     | 0.1      | NA | NA | NA | NA |
| 0     | 0.02  | -0.03 | -0.01 | 1    | 0.71     | 0.23     | 0.87     | NA | NA | NA | NA |

|       |       |       |       |   |          |          |          |    |    |    |    |
|-------|-------|-------|-------|---|----------|----------|----------|----|----|----|----|
| 0     | 0.04  | 0.01  | 0.03  | 1 | 0.35     | 0.79     | 0.16     | NA | NA | NA | NA |
| 0.02  | -0.08 | 0.06  | 0.21  | 1 | 0.88     | 0.13     | 3.90E-05 | NA | NA | NA | NA |
| -0.01 | -0.04 | 0.07  | 0.08  | 1 | 0.15     | 0.027    | 0.0017   | NA | NA | NA | NA |
| 0     | 0     | -0.03 | -0.05 | 1 | 1        | 0.077    | 0.00056  | NA | NA | NA | NA |
| 0.01  | 0.13  | -0.01 | 0.05  | 1 | 4.80E-06 | 0.71     | 0.027    | NA | NA | NA | NA |
| -0.01 | 0.01  | -0.08 | -0.06 | 1 | 0.93     | 0.00036  | 0.0058   | NA | NA | NA | NA |
| -0.02 | -0.04 | -0.1  | -0.11 | 1 | 0.52     | 0.19     | 0.14     | NA | NA | NA | NA |
| 0     | -0.02 | -0.03 | 0.06  | 1 | 0.83     | 0.4      | 0.065    | NA | NA | NA | NA |
| -0.06 | 0.07  | -0.07 | -0.02 | 1 | 1        | 0.053    | 0.67     | NA | NA | NA | NA |
| -0.01 | NA    | -0.12 | -0.09 | 1 | NA       | 0.039    | 0.18     | NA | NA | NA | NA |
| 0.06  | 0.08  | -0.17 | -0.1  | 1 | 1        | 9.00E-05 | 0.059    | NA | NA | NA | NA |
| 0.11  | 0.07  | -0.03 | -0.01 | 1 | 0.35     | 0.34     | 0.91     | NA | NA | NA | NA |
| 0.03  | 0.11  | -0.09 | 0.05  | 1 | 0.33     | 0.0015   | 0.14     | NA | NA | NA | NA |
| 0.02  | 0.04  | -0.08 | 0.15  | 1 | 0.92     | 0.19     | 0.019    | NA | NA | NA | NA |
| 0.02  | 0.53  | -0.16 | -0.13 | 1 | 3.80E-08 | 3.50E-06 | 0.0012   | NA | NA | NA | NA |
| 0     | 0.01  | -0.01 | 0.03  | 1 | 0.99     | 0.49     | 0.24     | NA | NA | NA | NA |
| 0     | -0.02 | -0.02 | 0     | 1 | 0.52     | 0.28     | 0.97     | NA | NA | NA | NA |
| 0     | 0.07  | -0.02 | 0.03  | 1 | 0.052    | 0.12     | 0.065    | NA | NA | NA | NA |
| 0.01  | 0.04  | -0.08 | 0     | 1 | 0.79     | 0.36     | 1        | NA | NA | NA | NA |
| 0.11  | 0.19  | -0.05 | 0.05  | 1 | 0.95     | 0.095    | 0.11     | NA | NA | NA | NA |
| 0.11  | 0.09  | -0.04 | -0.02 | 1 | 0.35     | 0.31     | 0.78     | NA | NA | NA | NA |
| 0     | 0.02  | -0.07 | -0.03 | 1 | 0.35     | 1.10E-07 | 0.032    | NA | NA | NA | NA |
| 0     | 0.13  | 0     | 0.02  | 1 | 0.13     | 1        | 0.49     | NA | NA | NA | NA |
| 0     | 0     | -0.13 | -0.1  | 1 | 1        | 0.13     | 0.26     | NA | NA | NA | NA |
| -0.15 | -0.21 | -0.07 | -0.05 | 1 | 0.9      | 0.02     | 0.19     | NA | NA | NA | NA |
| 0     | -0.02 | -0.05 | -0.03 | 1 | 0.62     | 0.012    | 0.14     | NA | NA | NA | NA |
| 0     | 0.04  | -0.02 | 0.03  | 1 | 0.32     | 0.46     | 0.22     | NA | NA | NA | NA |
| 0.01  | 0.15  | -0.03 | 0.01  | 1 | 0.0022   | 0.043    | 0.68     | NA | NA | NA | NA |
| 0.02  | 0.2   | -0.05 | 0.04  | 1 | 0.0013   | 0.039    | 0.25     | NA | NA | NA | NA |
| 0.06  | 0.02  | -0.06 | -0.01 | 1 | 1        | 0.21     | 1        | NA | NA | NA | NA |



|       |       |       |       |   |         |          |        |    |    |    |    |
|-------|-------|-------|-------|---|---------|----------|--------|----|----|----|----|
| 0.01  | 0.04  | -0.04 | -0.01 | 1 | 0.12    | 0.21     | 0.85   | NA | NA | NA | NA |
| 0.01  | -0.01 | 0.01  | 0.05  | 1 | 0.96    | 0.66     | 0.078  | NA | NA | NA | NA |
| -0.01 | -0.1  | -0.01 | 0.11  | 1 | 0.48    | 1        | 0.067  | NA | NA | NA | NA |
| -0.01 | 0.11  | -0.06 | -0.05 | 1 | 0.8     | 0.13     | 0.3    | NA | NA | NA | NA |
| 0     | 0.07  | -0.01 | 0.04  | 1 | 0.022   | 0.47     | 0.016  | NA | NA | NA | NA |
| 0.03  | 0.07  | -0.03 | -0.05 | 1 | 0.42    | 0.23     | 0.019  | NA | NA | NA | NA |
| 0     | 0     | -0.08 | -0.1  | 1 | 1       | 0.037    | 0.0011 | NA | NA | NA | NA |
| -0.02 | 0.12  | 0.02  | 0.01  | 1 | 0.53    | 0.58     | 0.81   | NA | NA | NA | NA |
| -0.01 | 0.01  | -0.05 | 0.02  | 1 | 0.78    | 0.015    | 0.48   | NA | NA | NA | NA |
| 0     | 0.08  | -0.03 | 0.06  | 1 | 0.014   | 0.058    | 0.0047 | NA | NA | NA | NA |
| 0.01  | 0.02  | -0.08 | 0     | 1 | 0.44    | 6.60E-05 | 1      | NA | NA | NA | NA |
| 0.01  | -0.01 | -0.06 | -0.04 | 1 | 0.92    | 0.0025   | 0.036  | NA | NA | NA | NA |
| 0     | 0.12  | -0.1  | -0.05 | 1 | 0.089   | 0.056    | 0.34   | NA | NA | NA | NA |
| 0.06  | 0.24  | -0.03 | -0.01 | 1 | 0.15    | 0.45     | 1      | NA | NA | NA | NA |
| 0     | 0.05  | -0.03 | 0     | 1 | 0.00015 | 0.0035   | 0.74   | NA | NA | NA | NA |
| 0     | -0.04 | -0.04 | 0     | 1 | 0.18    | 0.19     | 1      | NA | NA | NA | NA |
| -0.01 | 0     | -0.03 | 0.07  | 1 | 1       | 0.24     | 0.0024 | NA | NA | NA | NA |
| 0.01  | -0.07 | -0.03 | -0.04 | 1 | 0.3     | 0.65     | 0.5    | NA | NA | NA | NA |
| 0.01  | NA    | -0.06 | -0.04 | 1 | NA      | 0.051    | 0.38   | NA | NA | NA | NA |
| -0.01 | -0.03 | -0.04 | -0.06 | 1 | 0.53    | 0.42     | 0.047  | NA | NA | NA | NA |
| 0.01  | 0.06  | 0.01  | 0.03  | 1 | 0.19    | 0.92     | 0.2    | NA | NA | NA | NA |
| 0.01  | 0.39  | -0.04 | 0.05  | 1 | 0.15    | 0.31     | 0.35   | NA | NA | NA | NA |
| -0.67 | -0.7  | -0.05 | -0.15 | 1 | 0.72    | 1        | 0.056  | NA | NA | NA | NA |
| 0     | 0.09  | 0     | 0.03  | 1 | 0.0015  | 0.83     | 0.049  | NA | NA | NA | NA |
| 0     | 0.12  | 0.01  | 0.03  | 1 | 0.00039 | 0.46     | 0.063  | NA | NA | NA | NA |
| 0.03  | -0.01 | -0.01 | 0.04  | 1 | 1       | 0.83     | 0.23   | NA | NA | NA | NA |
| 0     | 0.04  | -0.03 | -0.01 | 1 | 0.21    | 0.11     | 0.42   | NA | NA | NA | NA |
| -0.01 | 0.03  | -0.04 | 0     | 1 | 0.37    | 0.012    | 0.99   | NA | NA | NA | NA |
| -0.04 | 0     | -0.09 | -0.03 | 1 | 1       | 0.0021   | 0.48   | NA | NA | NA | NA |
| 0.03  | 0.17  | -0.02 | 0.13  | 1 | 1       | 1        | 0.38   | NA | NA | NA | NA |

|       |       |       |       |    |         |          |         |    |    |    |    |
|-------|-------|-------|-------|----|---------|----------|---------|----|----|----|----|
| 0     | 0.04  | -0.05 | -0.04 | 1  | 0.26    | 7.50E-05 | 0.0031  | NA | NA | NA | NA |
| -0.03 | -0.11 | 0.02  | 0.01  | 1  | 0.0097  | 0.93     | 0.61    | NA | NA | NA | NA |
| 0.02  | 0.09  | -0.03 | 0     | 1  | 0.24    | 0.27     | 1       | NA | NA | NA | NA |
| NA    | -0.44 | -0.07 | -0.1  | NA | 0.043   | 0.42     | 0.14    | NA | NA | NA | NA |
| NA    | NA    | -0.07 | NA    | NA | NA      | 0.33     | NA      | NA | NA | NA | NA |
| NA    | NA    | -0.04 | 0.38  | NA | NA      | 1        | 0.0059  | NA | NA | NA | NA |
| NA    | -0.02 | -0.03 | -0.07 | NA | 0.91    | 0.7      | 0.32    | NA | NA | NA | NA |
| NA    | NA    | 0.03  | 0.16  | NA | NA      | 1        | 0.46    | NA | NA | NA | NA |
| NA    | 0.24  | -0.04 | -0.02 | NA | 0.078   | 0.46     | 0.77    | NA | NA | NA | NA |
| NA    | 0.2   | NA    | NA    | NA | 1       | NA       | NA      | NA | NA | NA | NA |
| NA    | -0.17 | -0.05 | 0.09  | NA | 1       | 0.91     | 0.29    | NA | NA | NA | NA |
| NA    | NA    | -0.01 | 0.01  | NA | NA      | 0.87     | 0.91    | NA | NA | NA | NA |
| NA    | NA    | -0.15 | -0.09 | NA | NA      | 0.007    | 0.095   | NA | NA | NA | NA |
| NA    | NA    | 0.07  | 0.19  | NA | NA      | 0.14     | 0.00011 | NA | NA | NA | NA |
| NA    | NA    | 0.02  | -0.01 | NA | NA      | 0.4      | 0.82    | NA | NA | NA | NA |
| NA    | NA    | NA    | NA    | NA | NA      | NA       | NA      | NA | NA | NA | NA |
| NA    | NA    | -0.08 | -0.09 | NA | NA      | 0.27     | 0.053   | NA | NA | NA | NA |
| NA    | 0     | -0.13 | 0     | NA | 1       | 1        | 1       | NA | NA | NA | NA |
| NA    | NA    | -0.36 | -0.31 | NA | NA      | 0.024    | 0.058   | NA | NA | NA | NA |
| NA    | -0.01 | -0.04 | -0.01 | NA | 1       | 0.21     | 0.97    | NA | NA | NA | NA |
| NA    | NA    | NA    | NA    | NA | NA      | NA       | NA      | NA | NA | NA | NA |
| NA    | -0.67 | 0     | 0.06  | NA | 0.00015 | 1        | 0.36    | NA | NA | NA | NA |
| NA    | NA    | 0.06  | 0.27  | NA | NA      | 1        | 0.01    | NA | NA | NA | NA |
| NA    | -0.1  | 0.03  | 0.01  | NA | 1       | 0.74     | 1       | NA | NA | NA | NA |
| NA    | -0.89 | -0.08 | -0.1  | NA | 0.025   | 0.0095   | 0.0093  | NA | NA | NA | NA |
| NA    | -0.03 | 0.15  | 0.04  | NA | 1       | 0.31     | 0.68    | NA | NA | NA | NA |
| NA    | NA    | NA    | 0     | NA | NA      | NA       | 1       | NA | NA | NA | NA |
| NA    | NA    | -0.14 | 0.29  | NA | NA      | 0.37     | 0.19    | NA | NA | NA | NA |
| NA    | NA    | 0.02  | 0.9   | NA | NA      | 1        | 0.24    | NA | NA | NA | NA |
| NA    | NA    | -0.2  | -0.16 | NA | NA      | 0.037    | 0.21    | NA | NA | NA | NA |

|    |       |       |       |    |      |        |          |    |    |    |    |
|----|-------|-------|-------|----|------|--------|----------|----|----|----|----|
| NA | -0.09 | -0.06 | -0.03 | NA | 1    | 0.14   | 0.61     | NA | NA | NA | NA |
| NA | 0.03  | -0.05 | 0.79  | NA | 1    | 0.38   | 0.00035  | NA | NA | NA | NA |
| NA | NA    | 0.11  | -0.1  | NA | NA   | 0.77   | 0.8      | NA | NA | NA | NA |
| NA | NA    | 0.09  | NA    | NA | NA   | 0.92   | NA       | NA | NA | NA | NA |
| NA | NA    | 0.02  | -0.01 | NA | NA   | 0.94   | 1        | NA | NA | NA | NA |
| NA | NA    | NA    | NA    | NA | NA   | NA     | NA       | NA | NA | NA | NA |
| NA | NA    | NA    | NA    | NA | NA   | NA     | NA       | NA | NA | NA | NA |
| NA | 0.12  | 0     | 0.17  | NA | 1    | 1      | 6.90E-05 | NA | NA | NA | NA |
| NA | NA    | -0.05 | -0.03 | NA | NA   | 0.24   | 0.74     | NA | NA | NA | NA |
| NA | NA    | -0.05 | 0.01  | NA | NA   | 0.36   | 1        | NA | NA | NA | NA |
| NA | NA    | -0.08 | 0.04  | NA | NA   | 0.02   | 0.71     | NA | NA | NA | NA |
| NA | 0.31  | -0.11 | -0.11 | NA | 1    | 0.064  | 0.029    | NA | NA | NA | NA |
| NA | NA    | 0.03  | -0.07 | NA | NA   | 0.63   | 0.17     | NA | NA | NA | NA |
| NA | NA    | 0.04  | 0.76  | NA | NA   | 0.73   | 0.0073   | NA | NA | NA | NA |
| NA | NA    | NA    | NA    | NA | NA   | NA     | NA       | NA | NA | NA | NA |
| NA | NA    | 0.26  | NA    | NA | NA   | 0.19   | NA       | NA | NA | NA | NA |
| NA | NA    | -0.09 | -0.06 | NA | NA   | 0.012  | 0.32     | NA | NA | NA | NA |
| NA | NA    | -0.08 | -0.02 | NA | NA   | 0.0098 | 0.77     | NA | NA | NA | NA |
| NA | NA    | 0.17  | 0.14  | NA | NA   | 0.014  | 0.21     | NA | NA | NA | NA |
| NA | NA    | NA    | NA    | NA | NA   | NA     | NA       | NA | NA | NA | NA |
| NA | 0.02  | -0.03 | -0.03 | NA | 0.92 | 0.6    | 0.52     | NA | NA | NA | NA |
| NA | NA    | 0.27  | -0.03 | NA | NA   | 0.22   | 1        | NA | NA | NA | NA |
| NA | NA    | -0.08 | 0.05  | NA | NA   | 0.042  | 0.65     | NA | NA | NA | NA |
| NA | 0.28  | -0.07 | 0.06  | NA | 0.36 | 0.046  | 0.24     | NA | NA | NA | NA |
| NA | NA    | -0.1  | 0.12  | NA | NA   | 0.13   | 0.48     | NA | NA | NA | NA |
| NA | NA    | NA    | NA    | NA | NA   | NA     | NA       | NA | NA | NA | NA |
| NA | -0.04 | -0.05 | 0.04  | NA | 0.9  | 0.29   | 0.48     | NA | NA | NA | NA |
| NA | 0.08  | -0.11 | -0.12 | NA | 0.33 | 0.0082 | 0.021    | NA | NA | NA | NA |
| NA | NA    | NA    | NA    | NA | NA   | NA     | NA       | NA | NA | NA | NA |
| NA | 0.2   | -0.03 | 0.01  | NA | 1    | 0.22   | 0.93     | NA | NA | NA | NA |

|    |       |       |       |    |       |          |        |    |    |    |    |
|----|-------|-------|-------|----|-------|----------|--------|----|----|----|----|
| NA | 0.06  | -0.02 | 0.13  | NA | 0.28  | 0.85     | 0.026  | NA | NA | NA | NA |
| NA | NA    | -0.04 | -0.01 | NA | NA    | 0.61     | 1      | NA | NA | NA | NA |
| NA | 0.03  | -0.01 | -0.03 | NA | 0.67  | 0.84     | 0.28   | NA | NA | NA | NA |
| NA | NA    | 0.1   | 0.02  | NA | NA    | 0.033    | 0.62   | NA | NA | NA | NA |
| NA | NA    | 0     | NA    | NA | NA    | 1        | NA     | NA | NA | NA | NA |
| NA | NA    | -0.05 | NA    | NA | NA    | 1        | NA     | NA | NA | NA | NA |
| NA | -0.75 | -0.23 | -0.12 | NA | 0.067 | 2.30E-07 | 0.27   | NA | NA | NA | NA |
| NA | NA    | -0.04 | 0.12  | NA | NA    | 0.65     | 0.15   | NA | NA | NA | NA |
| NA | NA    | -0.09 | NA    | NA | NA    | 1        | NA     | NA | NA | NA | NA |
| NA | 0.26  | -0.01 | 0.09  | NA | 0.021 | 0.74     | 0.0041 | NA | NA | NA | NA |
| NA | 0.75  | 0.04  | 0.22  | NA | 0.82  | 0.62     | 0.02   | NA | NA | NA | NA |
| NA | NA    | -0.16 | -0.1  | NA | NA    | 0.0061   | 0.18   | NA | NA | NA | NA |
| NA | NA    | NA    | NA    | NA | NA    | NA       | NA     | NA | NA | NA | NA |
| NA | NA    | 0.02  | NA    | NA | NA    | 1        | NA     | NA | NA | NA | NA |
| NA | -0.17 | -0.01 | 0.05  | NA | 1     | 1        | 0.88   | NA | NA | NA | NA |
| NA | -0.54 | -0.02 | 0.8   | NA | 0.97  | 1        | 0.0032 | NA | NA | NA | NA |
| NA | NA    | NA    | NA    | NA | NA    | NA       | NA     | NA | NA | NA | NA |
| NA | NA    | NA    | NA    | NA | NA    | NA       | NA     | NA | NA | NA | NA |
| NA | 0.02  | -0.04 | 0     | NA | 0.73  | 0.059    | 1      | NA | NA | NA | NA |
| NA | NA    | 0.04  | 0.01  | NA | NA    | 0.75     | 0.97   | NA | NA | NA | NA |
| NA | NA    | -0.38 | 0.17  | NA | NA    | 0.62     | 1      | NA | NA | NA | NA |
| NA | NA    | -0.13 | -0.15 | NA | NA    | 0.19     | 0.051  | NA | NA | NA | NA |
| NA | NA    | 0.15  | 0.16  | NA | NA    | 0.33     | 0.48   | NA | NA | NA | NA |
| NA | NA    | -0.5  | NA    | NA | NA    | 0.01     | NA     | NA | NA | NA | NA |
| NA | NA    | NA    | NA    | NA | NA    | NA       | NA     | NA | NA | NA | NA |
| NA | NA    | NA    | NA    | NA | NA    | NA       | NA     | NA | NA | NA | NA |
| NA | NA    | 0     | 0.14  | NA | NA    | 1        | 0.0044 | NA | NA | NA | NA |
| NA | NA    | NA    | NA    | NA | NA    | NA       | NA     | NA | NA | NA | NA |
| NA | NA    | 0.05  | 0.24  | NA | NA    | 0.42     | 0.039  | NA | NA | NA | NA |

**Table S3.** Summary of reduced representation bisulfite sequencing experiments.

| <b>Sample</b> | <b>Total reads</b> | <b>Mapped reads</b> | <b>Mapping ratio</b> | <b>Unique CpGs</b> | <b>Methyl CpG ratio</b> | <b>Mean CpG Coverage (fold)</b> | <b>CGI methyl ratio</b> | <b>Mean CGI coverage (fold)</b> |
|---------------|--------------------|---------------------|----------------------|--------------------|-------------------------|---------------------------------|-------------------------|---------------------------------|
| hMB           | 34116157           | 14784792            | 0.43                 | 3578895            | 0.73                    | 7.1                             | 0.39                    | 7.4                             |
| hWTCbl        | 30988632           | 11531006            | 0.37                 | 2718550            | 0.67                    | 7.6                             | 0.31                    | 9.1                             |
| mMYCN1        | 18133833           | 4302034             | 0.24                 | 904653             | 0.53                    | 8.0                             | 0.26                    | 16.8                            |
| mMYCN2        | 21624672           | 5104878             | 0.24                 | 983679             | 0.49                    | 9.9                             | 0.21                    | 18.1                            |
| mWTCbl_MYCN   | 21155615           | 5712997             | 0.27                 | 1147910            | 0.53                    | 10.2                            | 0.19                    | 21.5                            |
| mSmoA1        | 34189769           | 13980558            | 0.41                 | 1772976            | 0.46                    | 14.2                            | 0.15                    | 22.8                            |
| mSmoA2        | 31315892           | 11223740            | 0.36                 | 1391343            | 0.46                    | 14.5                            | 0.19                    | 20.8                            |
| mWTCbl_Smo    | 33993507           | 13394884            | 0.39                 | 1958842            | 0.55                    | 13.0                            | 0.17                    | 20.1                            |

CGI = CpG island

**Table S4.** DAMD-positive loci in human Burkitt lymphoma and mouse fibroblast cell lines.

**Daudi**

ABCB4  
ABCC4  
ABHD1  
ABHD7  
ABR  
ACCN1  
ACHE  
ACTN2  
ACVR1  
ACVR2A  
ADAM12  
ADAMTS10  
ADAMTS13  
ADAMTS14  
ADAMTS17  
ADAMTS2  
ADAMTS8  
ADAMTSL3  
ADAMTSL4  
ADCY6  
ADCYAP1R1  
ADD2  
ADM2  
ADORA2B  
ADRA1B  
ADRA2A  
AFAP  
AIFL  
AK3L2  
AKAP5  
ALDH1A3  
ALPK3  
ALX3  
AMIGO1  
AMIGO2  
AMPH  
ANKRD29  
ANKRD38  
ANKRD43  
ANKRD50  
ANKRD6  
AP3B2  
APBA1  
APEG1  
AQP5  
ARHGAP10

ARHGAP20  
ARHGAP26  
ARHGEF11  
ARID3C  
ARL4C  
ARNT2  
ARNTL  
ARNTL2  
ARRB1  
ARTN  
ASPHD2  
ASTN2  
ATHL1  
ATOH7  
ATP10A  
ATP1A3  
ATP6V1C2  
ATRNL1  
ATXN1  
AVP  
AXIN2  
B3GAT1  
B3GNT5  
B4GALNT3  
B4GALT6  
BAALC  
BACE2  
BAG3  
BAI3  
BAIAP2  
BARHL2  
BARX2  
BCAR1  
BHLHB5  
BLOC1S3  
BLVRB  
BMP2  
BMP6  
BMP8A  
BMP8B  
BMPR1A  
BMPR1B  
BNC1  
BOC  
BOK  
BRUNOL4  
BSPRY  
BTBD11  
BTBD3

C10orf25  
C10orf47  
C11orf11  
C11orf63  
C12orf53  
C14orf162  
C14orf172  
C14orf29  
C18orf1  
C18orf34  
C18orf56  
C19orf16  
C1orf117  
C1orf164  
C1orf78  
C1orf94  
C1orf95  
C1QDC2  
C1QL1  
C1QL2  
C1QL3  
C20orf100  
C20orf177  
C20orf39  
C20orf46  
C20orf86  
C21orf25  
C21orf63  
C21orf88  
C2orf19  
C3orf64  
C4orf12  
C4orf19  
C5orf25  
C6orf112  
C6orf117  
C6orf145  
C6orf154  
C6orf168  
C6orf60  
C6orf65  
C8orf38  
C8orf68  
C8orf79  
C9orf19  
C9orf21  
C9orf32  
C9orf4  
C9orf88



CABP1  
CACNA2D1  
CACNA2D2  
CACNA2D3  
CACNB2  
CACNG2  
CACNG7  
CADPS  
CAMK2N2  
CAMSAP1L1  
CAP2  
CAPN2  
CARD10  
CARD15  
CAST1  
CBS  
CCDC12  
CCDC3  
CCDC62  
CCDC67  
CCDC85A  
CCND2  
CCNJL  
CD151  
CD9  
CDC42BPA  
CDC42EP1  
CDH22  
CDH23  
CDH24  
CDK2AP2  
CDK5R2  
CEBPA  
CEBPD  
CELSR1  
CENTA1  
CGI-38  
CGNL1  
CGREF1  
CHDH  
CHES1  
CHFR  
CHRD2  
CHRM4  
CHRNA5  
CHST1  
CHST8  
CIB2  
CKAP4

CKB  
CMTM7  
COBL  
COL11A2  
COL18A1  
COL23A1  
COL27A1  
COL5A1  
COL9A3  
COLEC12  
COPZ2  
CORO2A  
CPAMD8  
CPEB1  
CPM  
CPNE2  
CPOX  
CPT1A  
CPXM2  
CRIM1  
CRMP1  
CRTAC1  
CRTC3  
CRYZL1  
CSDA  
CSF1  
CSMD3  
CSNK1G3  
CTGF  
CTSF  
CTSW  
CTTNBP2  
CUGBP2  
CXXC4  
CYFIP1  
CYGB  
CYR61  
CYS1  
DAAM2  
DACH1  
DACT1  
DAPK2  
DBN1  
DCAMKL1  
DCAMKL2  
DCBLD1  
DCHS1  
DCTD  
DDAH1

DDR1  
DFNA5  
DGKE  
DGKI  
DKFZP564J102  
DKFZP566N034  
DKFZP686A01247  
DKFZp761E198  
DLG5  
DLK1  
DLL1  
DLX3  
DLX6  
DMN  
DMRT2  
DMRT3  
DMRTA2  
DMWD  
DNAJA4  
DNAPTP6  
DOCK3  
DOCK5  
DOK6  
DPF3  
DPP10  
DPP4  
DPP6  
DPYSL5  
DRD2  
DRD4  
DSCR1  
DSCR1L1  
DST  
DTX4  
DUSP16  
DUSP5  
E2F6  
EBF3  
ECE1  
ECEL1  
EDG2  
EEF1A2  
EFEMP2  
EFNB2  
EGFL9  
EGFR  
EGR3  
ELAVL2  
ELOVL2

EMID1  
EMILIN2  
EMILIN3  
EML5  
EMX1  
EN1  
EN2  
ENPP1  
EPAS1  
EPB41L1  
EPB41L2  
EPB41L3  
EPB49  
EPHA10  
EPHB3  
EPHB4  
EPHB6  
EPHX1  
EPPK1  
ERRF1  
ESPN  
ETNK2  
EVC  
EVC2  
FAHD1  
FAM20A  
FAM20C  
FAM43B  
FAM49A  
FAM53A  
FAM57A  
FAM65A  
FAM78B  
FAM80A  
FAM83F  
FAM89A  
FARP1  
FAT  
FBLN1  
FBLN2  
FBN1  
FBXL7  
FBXO2  
FBXO44  
FEV  
FGF18  
FGF8  
FGF9  
FGFR1

FGFR2  
FHL3  
FIBCD1  
FJX1  
FKBP4  
FLJ10357  
FLJ11806  
FLJ12505  
FLJ20032  
FLJ20152  
FLJ20701  
FLJ22184  
FLJ23191  
FLJ30277  
FLJ33790  
FLJ33996  
FLJ36748  
FLJ37034  
FLJ38377  
FLJ39739  
FLJ42461  
FLJ42486  
FLJ44653  
FLJ44861  
FLJ45557  
FLJ46111  
FLJ46347  
FLJ90757  
FLNC  
FLT1  
FN3K  
FNDC1  
FNDC3A  
FNDC4  
FOXA1  
FOXC1  
FOXC2  
FOXD2  
FOXD3  
FOXE1  
FOXE3  
FOXF1  
FOXL1  
FRAT2  
FRMPD1  
FST  
FSTL3  
FYN  
FZD10

FZD4  
FZD6  
FZD7  
FZD9  
GABRA5  
GABRB3  
GALIG  
GALNAC4S-6ST  
GALNT12  
GAS1  
GAS6  
GAS7  
GAS8  
GATA4  
GATA6  
GBX2  
GCKR  
Gcom1  
GDF10  
GFER  
GFRA4  
GJC1  
GLRB  
GLT1D1  
GLT25D2  
GLT8D3  
GMPR  
GNAI1  
GNAL  
GNAQ  
GNG4  
GP1BB  
GPR124  
GPR125  
GPR135  
GPR150  
GPR161  
GPR178  
GPR68  
GPR88  
GPRC5B  
GPX7  
GRIA2  
GRID1  
GRIK3  
GRIN1  
GRIN2C  
GRIN2D  
GRIN3B

GRM6  
GRM8  
GRRP1  
GSCL  
GSN  
GUCY1A2  
GUCY1A3  
GYLTL1B  
H2AFY2  
HAND2  
HAS3  
HBA2  
HCN1  
HCN4  
HDGFRP3  
HDLBP  
HES3  
HES5  
HES6  
HHEX  
HHIP  
HIC1  
HMG20A  
HMGA2  
HNT  
HOMER2  
HOXA10  
HOXA13  
HOXA9  
HOXC12  
HOXD12  
HOXD13  
HOXD8  
HRES1  
HRH2  
HRH3  
HS747E2A  
HSPA12A  
HSPA12B  
HSPC159  
HSPG2  
HTR7  
HTRA1  
HTRA3  
HUNK  
ID3  
ID4  
IGF2  
IGF2AS

IGFBP2  
IGFBP3  
IGFBP4  
IGFBP7  
IGFBPL1  
IGSF21  
IGSF3  
IHH  
IL11  
IL13  
IL17RB  
IL17RC  
IL1R1  
INA  
INADL  
INHA  
INPP1  
IRX1  
IRX3  
IRX4  
IRX5  
ITGA9  
ITGB3  
ITPKA  
ITSN1  
JAG1  
JAKMIP1  
JARID2  
JPH1  
JSRP1  
KCNA2  
KCNB2  
KCNC1  
KCND2  
KCND3  
KCNF1  
KCNG3  
KCNH2  
KCNH3  
KCNJ12  
KCNK1  
KCNK10  
KCNK12  
KCNK4  
KCNK9  
KCNMB3  
KCNMB4  
KCNN1  
KCNQ1DN



KCNQ2  
KCNQ3  
KCNS2  
KCNS3  
KCTD12  
KCTD15  
KDELC2  
KIAA0514  
KIAA0773  
KIAA0789  
KIAA0863  
KIAA1446  
KIAA1571  
KIAA1727  
KIAA1804  
KIAA1862  
KIF17  
KIF1A  
KIF1B  
KIFC3  
KLF13  
KLF14  
KLF15  
KLF2  
KLF5  
KLF9  
KNDC1  
KREMEN1  
L3MBTL4  
LAMA5  
LARP6  
LASS6  
LATS2  
LBX1  
LBXCOR1  
LDLRAD3  
LDOC1L  
LEF1  
LENG9  
LEPREL2  
LGALS3  
LGI2  
LGI3  
LGR4  
LHX2  
LHX3  
LMO1  
LOC124976  
LOC126520

LOC126917  
LOC130576  
LOC147645  
LOC200312  
LOC204010  
LOC283999  
LOC284067  
LOC284395  
LOC285016  
LOC285382  
LOC344191  
LOC374569  
LOC375323  
LOC387941  
LOC388279  
LOC388407  
LOC388481  
LOC388610  
LOC388886  
LOC400451  
LOC401089  
LOC401317  
LOC401442  
LOC402382  
LOC402617  
LOC402689  
LOC440338  
LOC440863  
LOC440925  
LOC441193  
LOC441546  
LOC642287  
LOC642333  
LOC642377  
LOC642645  
LOC642670  
LOC642758  
LOC643018  
LOC643176  
LOC643196  
LOC643360  
LOC643461  
LOC643481  
LOC643634  
LOC644182  
LOC644224  
LOC644349  
LOC644542  
LOC644921

LOC644923  
LOC644980  
LOC644985  
LOC645052  
LOC645276  
LOC645284  
LOC645892  
LOC645929  
LOC646051  
LOC646312  
LOC646576  
LOC646882  
LOC646902  
LOC646998  
LOC647004  
LOC647219  
LOC647304  
LOC653104  
LOC653301  
LOC653620  
LOC89944  
LOC90113  
LOC92689  
LOXL1  
LOXL4  
LPGAT1  
LPHN1  
LPHN2  
LRFN4  
LRP11  
LRP12  
LRP3  
LRRC24  
LRRC38  
LRRC3B  
LRRC54  
LRRN1  
LRRN5  
LTBP3  
LUZP1  
MACF1  
MAL2  
MAN2A2  
MAP2K4  
MAP3K6  
MAP6  
MAP6D1  
MAP7  
MAPK13

MAPK8IP1  
MAPK8IP2  
MARK1  
MARVELD1  
MATK  
MCAM  
MCF2L  
MDFIC  
MDGA1  
MDH2  
MDK  
MEGF6  
MET  
MFAP3L  
MFSD4  
MFSD7  
MGAT5B  
MGC17624  
MGC33486  
MGC33846  
MGC33894  
MGC33926  
MGC35308  
MGC40574  
MGC42367  
MGC45800  
MGC52057  
MGC70857  
MGLL  
MICAL2  
MIXL1  
MLNR  
MLYCD  
MMP17  
MPP3  
MRAS  
MSI1  
MSX1  
MTHFSD  
MTNR1A  
MTSS1  
MXD4  
MXI1  
MYCN  
MYCNOS  
MYLK  
MYO1D  
MYO6  
MYRIP

N/A  
N4BP3  
NAV2  
NBEAL2  
NBLA00301  
NCAM2  
NCKAP1  
NDN  
NDRG4  
NEBL  
NELL1  
NEO1  
NETO1  
NEURL  
NEUROG2  
NFE2L1  
NFIA  
NKD1  
NKD2  
NKX1-1  
NKX2-2  
NLF1  
NOG  
NOS1AP  
NOTUM  
NPAS1  
NPAS2  
NPB  
NPR2  
NPTX1  
NPTX2  
NR2F1  
NR3C2  
NR4A2  
NR4A3  
NRG1  
NRXN1  
NRXN2  
NTN1  
NTN4  
NTNG1  
NTNG2  
NTSR1  
NUAK1  
NUDT14  
NXN  
NXP3  
OAF  
OLFML2A

OLIG1  
ONECUT2  
OPCML  
OPRD1  
OPRK1  
OSBPL1A  
OSBPL5  
OSMR  
OTP  
OVOL1  
OVOL2  
P2RX2  
PALM2  
PALM2-AKAP2  
PANK4  
PAQR9  
PARP8  
PARVA  
PAX1  
PC  
PCBD1  
PCBP4  
PCDH1  
PCDH7  
PCSK2  
PDE8A  
PDE8B  
PDE9A  
PDGFB  
PDIA2  
PDLIM1  
PDLIM4  
PDZD2  
PDZRN3  
PELI2  
PER3  
PEX5L  
PFKP  
PFTK1  
PGR  
PHOX2A  
PHOX2B  
PHPT1  
PIGZ  
PITPNM1  
PITPNM3  
PKD2  
PKDREJ  
PKNOX2

PKP2  
PLAC2  
PLCB1  
PLD5  
PLEC1  
PLEKHA7  
PLEKHC1  
PLEKHG5  
PLEKHH1  
PLEKHO1  
PLOD2  
PLXNA2  
PLXNB1  
PLXNC1  
PNMA1  
PODXL  
POU2F3  
POU3F1  
PPAP2C  
PPL  
PPM1M  
PPP1R13B  
PPP1R14C  
PPP1R1A  
PPP1R3D  
PPP1R9A  
PQLC1  
PRICKLE1  
PRKD1  
PRKG1  
PROK2  
PRP2  
PRPF6  
PRR5  
PRSS23  
PRTFDC1  
PSD2  
PSD3  
PSMA1  
PTF1A  
PTGER1  
PTGFRN  
PTHLH  
PTK7  
PTPN14  
PTPN21  
PTPN3  
PTPRE  
PTPRF

PTPRM  
PTPRT  
PUNC  
PVT1  
PYGO1  
RAB11FIP5  
RAB15  
RAB26  
RAB31  
RAB3IL1  
RAB42  
RAB4A  
RAB6IP1  
RAMP1  
RAMP2  
RAP1GAP  
RAPGEF4  
RAPH1  
RASGRF2  
RAVER2  
RAX  
RBM24  
RBPMS  
RDH10  
RDX  
REEP1  
REEP2  
RELN  
RET  
RGMA  
RGS17  
RGS6  
RGS7  
RHBDF1  
RHBDL1  
RHOC  
RHOU  
RIMS1  
RIMS2  
RND2  
RNF152  
RNF180  
RNF182  
RNF4  
ROR1  
ROR2  
RORA  
RORC  
RP5-860F19.3



RPESP  
RPL7  
RPS6KA4  
RRP22  
RSNL2  
RSPO4  
RSRC1  
RTBDN  
RTN4RL2  
RUNX2  
RUTBC2  
SALL1  
SAMD10  
SASH1  
SBF1  
SCAP1  
SCARA3  
SCARB2  
SCARF2  
SCCPDH  
SCN1B  
SCN5A  
SCRN1  
SCRT2  
SCT  
SCUBE2  
SDC1  
SEC14L2  
SELV  
SEMA3C  
SEMA3F  
SEMA4C  
SEPT4  
SEPT8  
SEPT9  
SERINC2  
SERPINB6  
SERPINE2  
SERTAD4  
SEZ6L  
SFRP1  
SFRP5  
SGCB  
SGPP2  
SH3BP2  
SH3BP4  
SH3PXD2A  
SHB  
SHC3

SHE  
SIRPA  
SIX2  
SIX3  
SLC10A4  
SLC15A3  
SLC16A10  
SLC16A3  
SLC1A6  
SLC22A15  
SLC22A3  
SLC24A4  
SLC25A24  
SLC25A29  
SLC25A4  
SLC26A5  
SLC35D2  
SLC35D3  
SLC35F3  
SLC44A3  
SLC4A11  
SLC4A3  
SLC4A4  
SLC6A1  
SLC6A11  
SLC9A3  
SLC9A3R2  
SLIT3  
SMAD1  
SMAD6  
SMAD7  
SMAD9  
SMARCD3  
SMO  
SMOX  
SNFT  
SNX24  
SOCS3  
SOCS6  
SORBS1  
SORCS1  
SORCS2  
SORCS3  
SORT1  
SOX11  
SOX13  
SOX21  
SOX4  
SOX8

SP5  
SP8  
SPHK1  
SPIRE2  
SPOCK1  
SPRY1  
SPRY2  
SPTBN4  
SRPK2  
SRXN1  
SSTR4  
ST3GAL4  
ST8SIA2  
ST8SIA6  
STK32C  
STMN3  
STX16  
SULF2  
SUSD1  
SUSD4  
SVIL  
SYDE1  
SYNC1  
SYNGR3  
SYT12  
SYT14  
TAC4  
TACC2  
TAL1  
TBC1D14  
TBC1D9  
TCERG1L  
TCF15  
TCF2  
TDRD10  
TFCP2L1  
THBS4  
THPO  
TM6SF1  
TMCC3  
TMEFF1  
TMEM130  
TMEM16A  
TMEM44  
TMEM54  
TMEM56  
TMEM98  
TMOD1  
TMTC1

TNFRSF11A  
TP53BP2  
TP53I11  
TP53INP1  
TRAF3IP1  
TRAPPC6A  
TRIM47  
TRIM58  
TRIM7  
TRIM71  
TRPM2  
TRPV4  
TSPAN5  
TTBK1  
TTMB  
TUB  
TUBB6  
TWIST1  
UAP1L1  
UCK2  
ULK2  
UNC5B  
UNQ470  
UNQ5831  
UNQ6490  
UNQ739  
URG4  
USP2  
USP46  
UST  
UTF1  
UTS2R  
VANGL1  
VASH1  
VASN  
VAV2  
VAV3  
VENTX  
VGLL2  
VIPR2  
VLDLR  
VMP  
VWA1  
WASF3  
WASPIP  
WBSCR17  
WDFY3  
WDR31  
WFS1

WNK2  
WNT6  
WWC1  
YBX2  
YIF1A  
YPEL3  
ZDHHC23  
ZFP28  
ZFP36L2  
ZFPM2  
ZFYVE28  
ZFYVE9  
ZIC2  
ZIC5  
ZNF22  
ZNF358  
ZNF365  
ZNF496  
ZNF536  
ZNF593  
ZNF651  
ZSCAN1  
ZSWIM5  
ZXDC

**Raji**

ABCB4  
ABCG1  
ABHD1  
ABHD7  
ABR  
ACCN1  
ACCN2  
ACHE  
ACPL2  
ACTN2  
ACVR1  
ACVR2A  
ADAM12  
ADAMTS10  
ADAMTS13  
ADAMTS14  
ADAMTS17  
ADAMTS18  
ADAMTS2  
ADAMTS8  
ADAMTSL3  
ADAMTSL4  
ADCY6  
ADCYAP1R1  
ADD2  
ADRA1B  
ADRA2A  
AFAP  
AIFL  
ALDH1A3  
ALPK3  
ALX3  
AMIGO1  
AMPH  
ANKRD29  
ANKRD38  
ANKRD43  
ANKRD6  
AP3B2  
APBA1  
APBB1  
APEG1  
APXL2  
AQP5  
ARHGAP20  
ARHGEF11  
ARID3C  
ARL4C

ARNT2  
ARNTL  
ARNTL2  
ARRB1  
ARTN  
ASTN2  
ATOH7  
ATP10A  
ATP1A3  
ATP6V1C2  
ATPAF1  
ATRNL1  
ATXN1  
ATXN7L4  
B3GAT1  
B3GNT5  
B3GNT7  
B4GALNT3  
B4GALT6  
BAALC  
BACE2  
BAG3  
BAI3  
BAIAP2  
BARHL2  
BARX2  
BCAR1  
BHLHB5  
BLVRB  
BMP2  
BMP4  
BMP6  
BMP8A  
BMP8B  
BMPR1B  
BNC1  
BNIP3  
BOC  
BOK  
BRUNOL4  
BSPRY  
BTBD11  
BTBD3  
C11orf11  
C11orf63  
C12orf53  
C14orf162  
C14orf172  
C14orf29

C14orf79  
C18orf1  
C18orf34  
C19orf16  
C19orf26  
C1orf78  
C1orf94  
C1orf95  
C1QDC2  
C1QL1  
C1QL3  
C20orf100  
C20orf108  
C20orf177  
C20orf39  
C20orf46  
C20orf86  
C21orf25  
C21orf63  
C21orf88  
C2orf19  
C3orf36  
C4orf12  
C4orf19  
C5orf25  
C6orf112  
C6orf117  
C6orf145  
C6orf154  
C6orf168  
C6orf60  
C6orf65  
C8orf38  
C8orf68  
C8orf79  
C9orf21  
C9orf32  
C9orf4  
C9orf88  
CABP1  
CACNA2D1  
CACNA2D2  
CACNA2D3  
CACNB2  
CACNG2  
CACNG7  
CAMK2N2  
CAMSAP1L1  
CAP2



CAPN2  
CARD10  
CAST1  
CBLN1  
CBS  
CCDC3  
CCDC40  
CCDC62  
CCDC67  
CCDC85A  
CCND2  
CCNJL  
CDC42BPA  
CDC42EP1  
CDH23  
CDH24  
CDK5R2  
CDKL1  
CDR2L  
CEBPA  
CEBPD  
CECR6  
CELSR1  
CELSR2  
CENTA1  
CGI-38  
CGNL1  
CGREF1  
CHD5  
CHFR  
CHML  
CHPT1  
CHRD2  
CHRM4  
CHST1  
CHST10  
CHST8  
CHSY1  
CIB2  
CITED4  
CKAP4  
CKB  
CMTM7  
CNTFR  
COBL  
COL11A2  
COL18A1  
COL23A1  
COL27A1

COL5A1  
COLEC12  
COPZ2  
CORO2A  
CORO2B  
CPAMD8  
CPEB1  
CPM  
CPT1A  
CPXM2  
CRIM1  
CRMP1  
CROCC  
CRTAC1  
CRTC3  
CSF1  
CTGF  
CTTNBP2  
CTXN1  
CUGBP2  
CXXC4  
CYFIP1  
CYGB  
CYR61  
CYS1  
DAAM2  
DACH1  
DACT1  
DAPK2  
DBN1  
DCAMKL1  
DCAMKL2  
DCBLD1  
DCHS1  
DDAH1  
DFNA5  
DGKE  
DGKI  
DKFZP564J102  
DKFZP566N034  
DKFZP686A01247  
DKFZp761E198  
DLG5  
DLK1  
DLL1  
DLX6  
DMN  
DMRT2  
DMRT3

DMRTA2  
DNAH10  
DNAJA4  
DNAPTP6  
DOCK3  
DOCK5  
DOK6  
DPP10  
DPP6  
DPYSL4  
DPYSL5  
DRD2  
DRD4  
DSCR1  
DSCR1L1  
DST  
DUSP16  
DUSP5  
E2F6  
EBF3  
ECEL1  
EDG2  
EEF1A2  
EFNB2  
EGFL9  
EGFR  
EIF2C4  
ELAVL2  
ELOVL2  
EMID1  
EMILIN2  
EMILIN3  
EMX1  
EN1  
EN2  
EPAS1  
EPB41L1  
EPB41L2  
EPB41L3  
EPB49  
EPHA10  
EPHB3  
EPHB4  
EPHX1  
EPPK1  
ERGIC1  
ERRFI1  
ESPN  
ETNK2

EVC  
EVC2  
EVL  
FAM20A  
FAM20C  
FAM43B  
FAM53A  
FAM65A  
FAM78B  
FAM83F  
FAM89A  
FARP1  
FAT  
FBLN1  
FBLN2  
FBXL11  
FBXL22  
FBXL7  
FBXO2  
FBXO44  
FEV  
FGF18  
FGF8  
FGFR1  
FGFR2  
FGFR3  
FHL3  
FIBCD1  
FJX1  
FLJ10357  
FLJ10916  
FLJ11806  
FLJ12505  
FLJ20032  
FLJ20152  
FLJ20699  
FLJ20701  
FLJ22184  
FLJ30277  
FLJ30707  
FLJ33790  
FLJ33996  
FLJ36748  
FLJ37034  
FLJ38377  
FLJ42461  
FLJ42486  
FLJ44653  
FLJ44861

FLJ45557  
FLJ46111  
FLJ46347  
FLJ90757  
FLNC  
FMNL2  
FN3K  
FNDC1  
FNDC3A  
FNDC4  
FOXA1  
FOXC1  
FOXC2  
FOXD2  
FOXD3  
FOXE1  
FOXE3  
FOXF1  
FOXL1  
FOXL2  
FRAT1  
FRAT2  
FRMPD1  
FST  
FSTL3  
FZD10  
FZD4  
FZD6  
FZD9  
GABRA5  
GABRB3  
GALIG  
GALNAC4S-6ST  
GALNT12  
GAS1  
GAS6  
GAS7  
GAS8  
GATA4  
GATA6  
GBX2  
GCKR  
Gcom1  
GFRA4  
GJC1  
GLIS1  
GLRB  
GLT1D1  
GMPR

GNAI1  
GNAO1  
GNAQ  
GNB4  
GP1BB  
GPR124  
GPR125  
GPR150  
GPR157  
GPR161  
GPR178  
GPR68  
GPR88  
GPRC5B  
GPX7  
GRHL1  
GRID1  
GRIK3  
GRIN1  
GRIN2C  
GRIN2D  
GRIN3B  
GRM6  
GRM8  
GRRP1  
GSN  
GUCY1A3  
H2AFY2  
HAND2  
HAS3  
HBA1  
HBA2  
HCN1  
HCN4  
HDGFRP3  
HDLBP  
HES3  
HES5  
HHEX  
HHIP  
HIC1  
HLF  
HMGA2  
HNT  
HOMER2  
HOMER3  
HOXA10  
HOXC12  
HOXD12

HOXD13  
HOXD8  
HRES1  
HRH2  
HRH3  
HS747E2A  
HSPA12A  
HSPA12B  
HSPG2  
HTR7  
HTRA1  
HTRA3  
HUNK  
ID3  
ID4  
IGF2  
IGF2AS  
IGFBP2  
IGFBP4  
IGFBP7  
IGFBPL1  
IGSF21  
IGSF3  
IHH  
IL11  
IL13  
IL1R1  
INADL  
INHA  
INPP1  
INSM1  
INSR  
IRX1  
IRX3  
IRX4  
IRX5  
ITGA9  
ITGB3  
ITGB5  
ITPKA  
JAG1  
JAKMIP1  
JPH1  
JSRP1  
KCNA2  
KCNB2  
KCNC1  
KCND2  
KCND3

KCNF1  
KCNG3  
KCNH2  
KCNH3  
KCNJ12  
KCNK1  
KCNK10  
KCNK12  
KCNK4  
KCNK9  
KCNMB3  
KCNN1  
KCNQ1  
KCNQ1DN  
KCNQ2  
KCNQ3  
KCNS2  
KCNS3  
KCTD12  
KDELC2  
KIAA0514  
KIAA0773  
KIAA0789  
KIAA0863  
KIAA0953  
KIAA1026  
KIAA1446  
KIAA1450  
KIAA1571  
KIAA1727  
KIAA1804  
KIAA1838  
KIAA1922  
KIF17  
KIF1A  
KIF1B  
KIFC3  
KLF14  
KLF5  
KLF9  
KNDC1  
KREMEN1  
L3MBTL4  
LAMA5  
LARP6  
LASS6  
LATS2  
LBX1  
LBXCOR1



LDLRAD3  
LDOC1L  
LEF1  
LENG9  
LEPREL2  
LGALS3  
LGI2  
LGI3  
LGR4  
LHX3  
LIMD1  
LITAF  
LMO1  
LMO2  
LOC124976  
LOC126520  
LOC126917  
LOC130576  
LOC146325  
LOC147645  
LOC155060  
LOC204010  
LOC283999  
LOC284023  
LOC284067  
LOC284395  
LOC285016  
LOC285382  
LOC344191  
LOC374569  
LOC374973  
LOC375323  
LOC387941  
LOC388279  
LOC388407  
LOC388481  
LOC388610  
LOC388886  
LOC400451  
LOC401056  
LOC401089  
LOC402689  
LOC440338  
LOC440863  
LOC441193  
LOC642287  
LOC642333  
LOC642377  
LOC642584

LOC642645  
LOC642670  
LOC642758  
LOC643176  
LOC643196  
LOC643360  
LOC643461  
LOC643481  
LOC643634  
LOC643879  
LOC644182  
LOC644224  
LOC644349  
LOC644542  
LOC644923  
LOC644980  
LOC644985  
LOC645104  
LOC645284  
LOC645379  
LOC645401  
LOC645892  
LOC645929  
LOC645970  
LOC646051  
LOC646312  
LOC646456  
LOC646576  
LOC646882  
LOC646902  
LOC646998  
LOC647004  
LOC647304  
LOC653104  
LOC653222  
LOC653620  
LOC89944  
LOC90113  
LOC92689  
LOXL4  
LPHN1  
LPHN2  
LRP3  
LRRRC20  
LRRRC24  
LRRRC38  
LRRRC3B  
LRRRC54  
LRRFIP1

LRRN5  
LTBP3  
LY6E  
LZTS2  
MACF1  
MAL2  
MAN2A2  
MAP3K6  
MAP6  
MAP6D1  
MAP7  
MAPK11  
MAPK13  
MAPK8IP1  
MAPK8IP2  
MARK1  
MARVELD1  
MATK  
MCAM  
MDGA1  
MDK  
MEGF6  
MEIS2  
MFAP3L  
MFSD4  
MFSD7  
MGAT5B  
MGC17624  
MGC33486  
MGC33846  
MGC33894  
MGC33926  
MGC35308  
MGC42367  
MGC45800  
MGC52057  
MGC70857  
MGLL  
MIXL1  
MLNR  
MMP17  
MRAS  
MRFAP1L1  
MSI1  
MSX1  
MTNR1A  
MTSS1  
MYCN  
MYCNOS

MYLK  
MYO6  
MYRIP  
N/A  
N4BP3  
NAV2  
NBLA00301  
NCAM2  
NCKAP1  
NDRG4  
NEBL  
NETO1  
NEURL  
NEUROG2  
NFE2L1  
NFIA  
NKD1  
NKD2  
NKX1-1  
NKX2-2  
NLF1  
NOG  
NOS1AP  
NOTUM  
NPAS1  
NPAS2  
NPB  
NPDC1  
NPR2  
NPTX1  
NPTX2  
NR2F1  
NRG1  
NTN1  
NTN4  
NTNG1  
NTNG2  
NTSR1  
NUAK1  
NXN  
OAF  
OLFM2  
OLFML2A  
OLIG1  
ONECUT2  
OPCML  
OPN3  
OPRD1  
OPRK1

OSBPL1A  
OSBPL5  
OSMR  
OTP  
OTUD1  
OVOL1  
OVOL2  
P2RX2  
PALM  
PALM2  
PALM2-AKAP2  
PANK4  
PAQR8  
PAQR9  
PARD6G  
PARVA  
PAX1  
PC  
PCBD1  
PCBP4  
PCDH1  
PCDH7  
PCSK2  
PDE8A  
PDE8B  
PDE9A  
PDGFB  
PDIA2  
PDLIM1  
PDZD2  
PDZRN3  
PELI2  
PER3  
PEX5L  
PFKP  
PFTK1  
PGR  
PHOX2A  
PHOX2B  
PHPT1  
PIGZ  
PITPNM3  
PITX1  
PKDREJ  
PKNOX2  
PKP2  
PLAC2  
PLD5  
PLEKHA1

PLEKHA7  
PLEKHC1  
PLEKHG5  
PLEKHH1  
PLEKHO1  
PLOD2  
PLXNA2  
PLXNB1  
PLXNC1  
PNMA1  
POU3F1  
PPIL6  
PPL  
PPM1M  
PPP1R14C  
PPP1R1A  
PPP1R3D  
PPP1R9A  
PRICKLE1  
PRKCQ  
PRKD1  
PRKG1  
PROK2  
PROZ  
PRP2  
PRR5  
PRRX2  
PRSS23  
PRTFDC1  
PSD2  
PSD3  
PSMA1  
PTF1A  
PTGER1  
PTGFRN  
PTHLH  
PTK7  
PTMS  
PTPN14  
PTPN21  
PTPRE  
PTPRF  
PTPRK  
PTPRM  
PTPRT  
PUNC  
PYGO1  
QDPR  
RAB11FIP5

RAB15  
RAB26  
RAB31  
RAB3IL1  
RAB42  
RAB4A  
RAB6IP1  
RAMP1  
RAP1GAP  
RAPGEF4  
RAPH1  
RASA3  
RASD2  
RASGRF2  
RAVER2  
RAX  
RBM24  
RBPMS  
RCOR2  
RDX  
REEP1  
REEP2  
RELN  
RET  
RGMA  
RGS17  
RGS7  
RHBDF1  
RHBDL1  
RHOC  
RHOU  
RIMS1  
RIMS2  
RNF144  
RNF152  
RNF180  
RNF2  
RNF4  
ROR1  
ROR2  
RORA  
RORC  
RP5-860F19.3  
RPESP  
RRN3  
RRP22  
RSNL2  
RSPO4  
RTN4RL2

RUNX2  
RUTBC2  
RYS2  
SALL1  
SASH1  
SCAMP5  
SCAP1  
SCARA3  
SCARF2  
SCCPDH  
SCN1B  
SCN5A  
SCRN1  
SCRT2  
SCT  
SCUBE2  
SDC1  
SELV  
SEMA3C  
SEMA3F  
SEMA4C  
SEPT4  
SEPT8  
SEPT9  
SERINC2  
SERPINE2  
SERTAD4  
SFRP1  
SFRP5  
SGPP2  
SH3BP2  
SH3BP4  
SH3PXD2A  
SHB  
SHC3  
SHE  
SHF  
SIRPA  
SIX2  
SIX3  
SIX5  
SLC10A4  
SLC15A3  
SLC16A10  
SLC16A3  
SLC1A6  
SLC22A15  
SLC22A3  
SLC24A3



SLC24A4  
SLC25A24  
SLC25A29  
SLC26A5  
SLC35D2  
SLC35F3  
SLC4A11  
SLC4A3  
SLC4A4  
SLC6A1  
SLC6A11  
SLC9A3  
SLC9A3R2  
SLIT3  
SMAD1  
SMAD6  
SMAD9  
SMARCD3  
SMO  
SMOX  
SMPD2  
SNFT  
SNX24  
SNX9  
SOCS6  
SORBS1  
SORCS1  
SORCS2  
SORT1  
SOX11  
SOX12  
SOX13  
SOX21  
SOX4  
SOX8  
SP5  
SP8  
SPHK1  
SPIRE2  
SPOCK1  
SPRY1  
SPRY2  
SPSB1  
SPTBN4  
SRPK2  
SRXN1  
ST3GAL4  
ST8SIA2  
ST8SIA6

STK32C  
STX16  
SULF2  
SUSD1  
SUSD4  
SVIL  
SYDE1  
SYNC1  
SYT12  
SYT14  
TAC4  
TACC2  
TAL1  
TBX21  
TCERG1L  
TCF15  
TCF2  
TDRD10  
TFCP2L1  
THBS4  
THPO  
TIRAP  
TM6SF1  
TMCC3  
TMEM130  
TMEM16A  
TMEM42  
TMEM54  
TMEM56  
TMEM98  
TMOD1  
TMTC1  
TNFRSF11A  
TP53BP2  
TP53I11  
TP53INP1  
TRIM47  
TRIM71  
TRPM2  
TRPV4  
TSHZ3  
TSPAN4  
TSPAN5  
TSPAN9  
TTBK1  
TTMA  
TTMB  
TUB  
TUBB6

TUSC1  
TWIST1  
TYRO3  
UBE2U  
ULK2  
UNC5B  
UNQ470  
UNQ5831  
UNQ6490  
UNQ739  
USP2  
USP46  
UTF1  
UTS2R  
VANGL1  
VASH1  
VASN  
VAV2  
VAV3  
VGLL2  
VIPR2  
VWA1  
WASF3  
WASPIP  
WBSCR17  
WDFY3  
WNK2  
WNT6  
WSB2  
WWC1  
YAP1  
YBX2  
ZAK  
ZAR1  
ZFP28  
ZFPM2  
ZFYVE28  
ZFYVE9  
ZIC2  
ZIC5  
ZNF358  
ZNF496  
ZNF536  
ZNF593  
ZNF651  
ZSCAN1  
ZSWIM5

## **Daidi and Raji Intersect**

ABCB4

ABHD1

ABHD7

ABR

ACCN1

ACHE

ACTN2

ACVR1

ACVR2A

ADAM12

ADAMTS10

ADAMTS13

ADAMTS14

ADAMTS17

ADAMTS2

ADAMTS8

ADAMTSL3

ADAMTSL4

ADCY6

ADCYAP1R1

ADD2

ADRA1B

ADRA2A

AFAP

AIFL

ALDH1A3

ALPK3

ALX3

AMIGO1

AMPH

ANKRD29

ANKRD38

ANKRD43

ANKRD6

AP3B2

APBA1

APEG1

AQP5

ARHGAP20

ARHGEF11

ARID3C

ARL4C

ARNT2

ARNTL

ARNTL2

ARRB1

ARTN

ASTN2

ATOH7  
ATP10A  
ATP1A3  
ATP6V1C2  
ATRNL1  
ATXN1  
B3GAT1  
B3GNT5  
B4GALNT3  
B4GALT6  
BAALC  
BACE2  
BAG3  
BAI3  
BAIAP2  
BARHL2  
BARX2  
BCAR1  
BHLHB5  
BLVRB  
BMP2  
BMP6  
BMP8A  
BMP8B  
BMPR1B  
BNC1  
BOC  
BOK  
BRUNOL4  
BSPRY  
BTBD11  
BTBD3  
C11orf11  
C11orf63  
C12orf53  
C14orf162  
C14orf172  
C14orf29  
C18orf1  
C18orf34  
C19orf16  
C1orf78  
C1orf94  
C1orf95  
C1QDC2  
C1QL1  
C1QL3  
C20orf100  
C20orf177

C20orf39  
C20orf46  
C20orf86  
C21orf25  
C21orf63  
C21orf88  
C2orf19  
C4orf12  
C4orf19  
C5orf25  
C6orf112  
C6orf117  
C6orf145  
C6orf154  
C6orf168  
C6orf60  
C6orf65  
C8orf38  
C8orf68  
C8orf79  
C9orf21  
C9orf32  
C9orf4  
C9orf88  
CABP1  
CACNA2D1  
CACNA2D2  
CACNA2D3  
CACNB2  
CACNG2  
CACNG7  
CAMK2N2  
CAMSAP1L1  
CAP2  
CAPN2  
CARD10  
CAST1  
CBS  
CCDC3  
CCDC62  
CCDC67  
CCDC85A  
CCND2  
CCNJL  
CDC42BPA  
CDC42EP1  
CDH23  
CDH24  
CDK5R2

CEBPA  
CEBPD  
CELSR1  
CENTA1  
CGI-38  
CGNL1  
CGREF1  
CHFR  
CHRD2  
CHRM4  
CHST1  
CHST8  
CIB2  
CKAP4  
CKB  
CMTM7  
COBL  
COL11A2  
COL18A1  
COL23A1  
COL27A1  
COL5A1  
COLEC12  
COPZ2  
CORO2A  
CPAMD8  
CPEB1  
CPM  
CPT1A  
CPXM2  
CRIM1  
CRMP1  
CRTAC1  
CRTC3  
CSF1  
CTGF  
CTTNBP2  
CUGBP2  
CXXC4  
CYFIP1  
CYGB  
CYR61  
CYS1  
DAAM2  
DACH1  
DACT1  
DAPK2  
DBN1  
DCAMKL1

DCAMKL2  
DCBLD1  
DCHS1  
DDAH1  
DFNA5  
DGKE  
DGKI  
DKFZP564J102  
DKFZP566N034  
DKFZP686A01247  
DKFZp761E198  
DLG5  
DLK1  
DLL1  
DLX6  
DMN  
DMRT2  
DMRT3  
DMRTA2  
DNAJA4  
DNAPTP6  
DOCK3  
DOCK5  
DOK6  
DPP10  
DPP6  
DPYSL5  
DRD2  
DRD4  
DSCR1  
DSCR1L1  
DST  
DUSP16  
DUSP5  
E2F6  
EBF3  
ECEL1  
EDG2  
EEF1A2  
EFNB2  
EGFL9  
EGFR  
ELAVL2  
ELOVL2  
EMID1  
EMILIN2  
EMILIN3  
EMX1  
EN1



EN2  
EPAS1  
EPB41L1  
EPB41L2  
EPB41L3  
EPB49  
EPA10  
EPHB3  
EPHB4  
EPHX1  
EPPK1  
ERRFI1  
ESPN  
ETNK2  
EVC  
EVC2  
FAM20A  
FAM20C  
FAM43B  
FAM53A  
FAM65A  
FAM78B  
FAM83F  
FAM89A  
FARP1  
FAT  
FBLN1  
FBLN2  
FBXL7  
FBXO2  
FBXO44  
FEV  
FGF18  
FGF8  
FGFR1  
FGFR2  
FHL3  
FIBCD1  
FJX1  
FLJ10357  
FLJ11806  
FLJ12505  
FLJ20032  
FLJ20152  
FLJ20701  
FLJ22184  
FLJ30277  
FLJ33790  
FLJ33996

FLJ36748  
FLJ37034  
FLJ38377  
FLJ42461  
FLJ42486  
FLJ44653  
FLJ44861  
FLJ45557  
FLJ46111  
FLJ46347  
FLJ90757  
FLNC  
FN3K  
FNDC1  
FNDC3A  
FNDC4  
FOXA1  
FOXC1  
FOXC2  
FOXD2  
FOXD3  
FOXE1  
FOXE3  
FOXF1  
FOXL1  
FRAT2  
FRMPD1  
FST  
FSTL3  
FZD10  
FZD4  
FZD6  
FZD9  
GABRA5  
GABRB3  
GALIG  
GALNAC4S-6ST  
GALNT12  
GAS1  
GAS6  
GAS7  
GAS8  
GATA4  
GATA6  
GBX2  
GCKR  
Gcom1  
GFRA4  
GJC1

GLRB  
GLT1D1  
GMPR  
GNAI1  
GNAQ  
GP1BB  
GPR124  
GPR125  
GPR150  
GPR161  
GPR178  
GPR68  
GPR88  
GPRC5B  
GPX7  
GRID1  
GRIK3  
GRIN1  
GRIN2C  
GRIN2D  
GRIN3B  
GRM6  
GRM8  
GRRP1  
GSN  
GUCY1A3  
H2AFY2  
HAND2  
HAS3  
HBA2  
HCN1  
HCN4  
HDGFRP3  
HDLBP  
HES3  
HES5  
HHEX  
HHIP  
HIC1  
HMGA2  
HNT  
HOMER2  
HOXA10  
HOXC12  
HOXD12  
HOXD13  
HOXD8  
HRES1  
HRH2

HRH3  
HS747E2A  
HSPA12A  
HSPA12B  
HSPG2  
HTR7  
HTRA1  
HTRA3  
HUNK  
ID3  
ID4  
IGF2  
IGF2AS  
IGFBP2  
IGFBP4  
IGFBP7  
IGFBPL1  
IGSF21  
IGSF3  
IHH  
IL11  
IL13  
IL1R1  
INADL  
INHA  
INPP1  
IRX1  
IRX3  
IRX4  
IRX5  
ITGA9  
ITGB3  
ITPKA  
JAG1  
JAKMIP1  
JPH1  
JSRP1  
KCNA2  
KCNB2  
KCNC1  
KCND2  
KCND3  
KCNF1  
KCNG3  
KCNH2  
KCNH3  
KCNJ12  
KCNK1  
KCNK10

KCNK12  
KCNK4  
KCNK9  
KCNMB3  
KCNN1  
KCNQ1DN  
KCNQ2  
KCNQ3  
KCNS2  
KCNS3  
KCTD12  
KDELC2  
KIAA0514  
KIAA0773  
KIAA0789  
KIAA0863  
KIAA1446  
KIAA1571  
KIAA1727  
KIAA1804  
KIF17  
KIF1A  
KIF1B  
KIFC3  
KLF14  
KLF5  
KLF9  
KNDC1  
KREMEN1  
L3MBTL4  
LAMA5  
LARP6  
LASS6  
LATS2  
LBX1  
LBXCOR1  
LDLRAD3  
LDOC1L  
LEF1  
LENG9  
LEPREL2  
LGALS3  
LGI2  
LGI3  
LGR4  
LHX3  
LMO1  
LOC124976  
LOC126520

LOC126917  
LOC130576  
LOC147645  
LOC204010  
LOC283999  
LOC284067  
LOC284395  
LOC285016  
LOC285382  
LOC344191  
LOC374569  
LOC375323  
LOC387941  
LOC388279  
LOC388407  
LOC388481  
LOC388610  
LOC388886  
LOC400451  
LOC401089  
LOC402689  
LOC440338  
LOC440863  
LOC441193  
LOC642287  
LOC642333  
LOC642377  
LOC642645  
LOC642670  
LOC642758  
LOC643176  
LOC643196  
LOC643360  
LOC643461  
LOC643481  
LOC643634  
LOC644182  
LOC644224  
LOC644349  
LOC644542  
LOC644923  
LOC644980  
LOC644985  
LOC645284  
LOC645892  
LOC645929  
LOC646051  
LOC646312  
LOC646576

LOC646882  
LOC646902  
LOC646998  
LOC647004  
LOC647304  
LOC653104  
LOC653620  
LOC89944  
LOC90113  
LOC92689  
LOXL4  
LPHN1  
LPHN2  
LRP3  
LRRC24  
LRRC38  
LRRC3B  
LRRC54  
LRRN5  
LTBP3  
MACF1  
MAL2  
MAN2A2  
MAP3K6  
MAP6  
MAP6D1  
MAP7  
MAPK13  
MAPK8IP1  
MAPK8IP2  
MARK1  
MARVELD1  
MATK  
MCAM  
MDGA1  
MDK  
MEGF6  
MFAP3L  
MFSD4  
MFSD7  
MGAT5B  
MGC17624  
MGC33486  
MGC33846  
MGC33894  
MGC33926  
MGC35308  
MGC42367  
MGC45800

MGC52057  
MGC70857  
MGLL  
MIXL1  
MLNR  
MMP17  
MRAS  
MSI1  
MSX1  
MTNR1A  
MTSS1  
MYCN  
MYCNOS  
MYLK  
MYO6  
MYRIP  
N/A  
N4BP3  
NAV2  
NBLA00301  
NCAM2  
NCKAP1  
NDRG4  
NEBL  
NETO1  
NEURL  
NEUROG2  
NFE2L1  
NFIA  
NKD1  
NKD2  
NKX1-1  
NKX2-2  
NLF1  
NOG  
NOS1AP  
NOTUM  
NPAS1  
NPAS2  
NPB  
NPR2  
NPTX1  
NPTX2  
NR2F1  
NRG1  
NTN1  
NTN4  
NTNG1  
NTNG2



NTSR1  
NUAK1  
NXN  
OAF  
OLFML2A  
OLIG1  
ONECUT2  
OPCML  
OPRD1  
OPRK1  
OSBPL1A  
OSBPL5  
OSMR  
OTP  
OVOL1  
OVOL2  
P2RX2  
PALM2  
PALM2-AKAP2  
PANK4  
PAQR9  
PARVA  
PAX1  
PC  
PCBD1  
PCBP4  
PCDH1  
PCDH7  
PCSK2  
PDE8A  
PDE8B  
PDE9A  
PDGFB  
PDIA2  
PDLIM1  
PDZD2  
PDZRN3  
PELI2  
PER3  
PEX5L  
PFKP  
PFTK1  
PGR  
PHOX2A  
PHOX2B  
PHPT1  
PIGZ  
PITPNM3  
PKDREJ

PKNOX2  
PKP2  
PLAC2  
PLD5  
PLEKHA7  
PLEKHC1  
PLEKHG5  
PLEKHH1  
PLEKHO1  
PLOD2  
PLXNA2  
PLXNB1  
PLXNC1  
PNMA1  
POU3F1  
PPL  
PPM1M  
PPP1R14C  
PPP1R1A  
PPP1R3D  
PPP1R9A  
PRICKLE1  
PRKD1  
PRKG1  
PROK2  
PRP2  
PRR5  
PRSS23  
PRTFDC1  
PSD2  
PSD3  
PSMA1  
PTF1A  
PTGER1  
PTGFRN  
PTHLH  
PTK7  
PTPN14  
PTPN21  
PTPRE  
PTPRF  
PTPRM  
PTPRT  
PUNC  
PYGO1  
RAB11FIP5  
RAB15  
RAB26  
RAB31

RAB3IL1  
RAB42  
RAB4A  
RAB6IP1  
RAMP1  
RAP1GAP  
RAPGEF4  
RAPH1  
RASGRF2  
RAVER2  
RAX  
RBM24  
RBPMS  
RDX  
REEP1  
REEP2  
RELN  
RET  
RGMA  
RGS17  
RGS7  
RHBDF1  
RHBDL1  
RHOC  
RHOU  
RIMS1  
RIMS2  
RNF152  
RNF180  
RNF4  
ROR1  
ROR2  
RORA  
RORC  
RP5-860F19.3  
RPESP  
RRP22  
RSNL2  
RSPO4  
RTN4RL2  
RUNX2  
RUTBC2  
SALL1  
SASH1  
SCAP1  
SCARA3  
SCARF2  
SCCPDH  
SCN1B

SCN5A  
SCRN1  
SCRT2  
SCT  
SCUBE2  
SDC1  
SELV  
SEMA3C  
SEMA3F  
SEMA4C  
SEPT4  
SEPT8  
SEPT9  
SERINC2  
SERPINE2  
SERTAD4  
SFRP1  
SFRP5  
SGPP2  
SH3BP2  
SH3BP4  
SH3PXD2A  
SHB  
SHC3  
SHE  
SIRPA  
SIX2  
SIX3  
SLC10A4  
SLC15A3  
SLC16A10  
SLC16A3  
SLC1A6  
SLC22A15  
SLC22A3  
SLC24A4  
SLC25A24  
SLC25A29  
SLC26A5  
SLC35D2  
SLC35F3  
SLC4A11  
SLC4A3  
SLC4A4  
SLC6A1  
SLC6A11  
SLC9A3  
SLC9A3R2  
SLIT3

SMAD1  
SMAD6  
SMAD9  
SMARCD3  
SMO  
SMOX  
SNFT  
SNX24  
SOCS6  
SORBS1  
SORCS1  
SORCS2  
SORT1  
SOX11  
SOX13  
SOX21  
SOX4  
SOX8  
SP5  
SP8  
SPHK1  
SPIRE2  
SPOCK1  
SPRY1  
SPRY2  
SPTBN4  
SRPK2  
SRXN1  
ST3GAL4  
ST8SIA2  
ST8SIA6  
STK32C  
STX16  
SULF2  
SUSD1  
SUSD4  
SVIL  
SYDE1  
SYNC1  
SYT12  
SYT14  
TAC4  
TACC2  
TAL1  
TCERG1L  
TCF15  
TCF2  
TDRD10  
TFCP2L1

THBS4  
THPO  
TM6SF1  
TMCC3  
TMEM130  
TMEM16A  
TMEM54  
TMEM56  
TMEM98  
TMOD1  
TMTC1  
TNFRSF11A  
TP53BP2  
TP53I11  
TP53INP1  
TRIM47  
TRIM71  
TRPM2  
TRPV4  
TSPAN5  
TTBK1  
TTMB  
TUB  
TUBB6  
TWIST1  
ULK2  
UNC5B  
UNQ470  
UNQ5831  
UNQ6490  
UNQ739  
USP2  
USP46  
UTF1  
UTS2R  
VANGL1  
VASH1  
VASN  
VAV2  
VAV3  
VGLL2  
VIPR2  
VWA1  
WASF3  
WASPIP  
WBSCR17  
WDFY3  
WNK2  
WNT6

WWC1  
YBX2  
ZFP28  
ZFPM2  
ZFYVE28  
ZFYVE9  
ZIC2  
ZIC5  
ZNF358  
ZNF496  
ZNF536  
ZNF593  
ZNF651  
ZSCAN1  
ZSWIM5

**3T3**

0610010F05Rik  
1110006O24Rik  
1110032F04Rik  
1110059E24Rik  
1190002N15Rik  
1190005I06Rik  
1500012F01Rik  
1600002K03Rik  
1600014C23Rik  
1600021P15Rik  
1700010M22Rik  
1700016C15Rik  
1700019N12Rik  
1700034H15Rik  
1700052K11Rik  
1700109F18Rik  
1810041L15Rik  
2010300C02Rik  
2310002J15Rik  
2410004B18Rik  
2410025L10Rik  
2410129H14Rik  
2610017I09Rik  
2610024G14Rik  
2610109H07Rik  
2610507B11Rik  
2700081O15Rik  
2700086A05Rik  
2810032G03Rik  
2810459M11Rik  
2900092D14Rik  
3830408C21Rik  
4732471D19Rik  
4833424O15Rik  
4921515J06Rik  
4930402H24Rik  
4930426L09Rik  
4930442L01Rik  
4930447C04Rik  
4930488L21Rik  
4930515G01Rik



4930539J05Rik  
4930588N13Rik  
4931429I11Rik  
4933403G14Rik  
4933406I18Rik  
4933421O10Rik  
5031439G07Rik  
5430405G05Rik  
5930412G12Rik  
6330512M04Rik  
6430548M08Rik  
6430704M03Rik  
6720463M24Rik  
8430427H17Rik  
9030409G11Rik  
9030612E09Rik  
9130206I24Rik  
9130221H12Rik  
9230105E10Rik  
9330171B17Rik  
9330182L06Rik  
9430021M05Rik  
9430083A17Rik  
9530036O11Rik  
9830001H06Rik  
9930021D14Rik  
A030009H04Rik  
A230083G16Rik  
A530013C23Rik  
A530058N18Rik  
A730018C14Rik  
A730020M07Rik  
A930007I19Rik  
A930017M01Rik  
Aard  
Aatk  
Abcb4  
Abhd15  
Abr  
Accn1  
Accn2  
Acot3

Acot4  
Acot5  
Acot6  
Actg1  
Actr2  
Acvr1b  
Acvr2a  
Acvr2b  
Adam11  
Adamts20  
Adamts8  
Adamtsl3  
Adap1  
Adarb1  
Adck1  
Adcy2  
Adcy5  
Adcy9  
Adnp  
Adra1d  
Adra2a  
Adra2c  
Adrb1  
Adrbk2  
Aebp2  
Aes  
Aff3  
Agap1  
Agpat2  
Agpat3  
AI314180  
AI314831  
AI316807  
AI504432  
AI646023  
AI837181  
Aifm3  
Aig1  
Ajap1  
AK003136  
AK005214  
AK005503

AK005967  
AK006001  
AK006186  
AK006664  
AK007571  
AK009335  
AK010870  
AK011568  
AK011684  
AK011897  
AK012841  
AK013046  
AK014224  
AK015004  
AK015092  
AK015492  
AK016097  
AK016265  
AK016417  
AK016591  
AK016734  
AK016788  
AK017040  
AK017143  
AK017177  
AK017779  
AK017924  
AK018929  
AK019375  
AK019514  
AK019738  
AK019838  
AK029023  
AK029443  
AK029834  
AK031498  
AK031561  
AK033147  
AK034519  
AK035754  
AK035785  
AK035982

AK036329  
AK037260  
AK038079  
AK038087  
AK038749  
AK039014  
AK039268  
AK039417  
AK039608  
AK039882  
AK040320  
AK040960  
AK041531  
AK042126  
AK043502  
AK043505  
AK043607  
AK044036  
AK045070  
AK046216  
AK047558  
AK047727  
AK048292  
AK048886  
AK048941  
AK052792  
AK052909  
AK075633  
AK076706  
AK079280  
AK079802  
AK080025  
AK080278  
AK080292  
AK080648  
AK080695  
AK081136  
AK081497  
AK083124  
AK083606  
AK084517  
AK085371

AK085522  
AK085881  
AK087460  
AK089135  
AK131739  
AK132123  
AK132490  
AK132723  
AK133391  
AK133446  
AK134673  
AK135560  
AK135691  
AK136882  
AK138307  
AK138328  
AK138755  
AK140072  
AK140446  
AK142074  
AK142386  
AK144664  
AK144823  
AK144984  
AK145301  
AK146255  
AK147796  
AK148461  
AK149188  
AK154406  
AK155239  
AK158619  
AK159003  
AK159351  
AK160141  
AK161590  
AK162496  
AK162774  
AK162942  
AK163103  
AK163532  
AK163592

AK166060  
AK166079  
AK190497  
AK191498  
AK197782  
AK211096  
AK211336  
AK211593  
AK216824  
Ak4  
Ak5  
Akap9  
Akd2  
Akirin2  
Akr1e1  
Aldh1a2  
Alg3  
Alx3  
Amd2  
Amfr  
Amigo1  
Amigo2  
Ampd3  
Anapc11  
Angpt1  
Ank  
Ankmy1  
Ankrd12  
Ankrd13a  
Ankrd13b  
Ankrd29  
Ankrd34b  
Ankrd40  
Ankrd52  
Ankrd60  
Ano8  
Anp32b  
Ap1b1  
Ap3s1  
Apba2  
Aplp1  
ApoH

Aqp5  
Arap2  
Arglu1  
Arhgap17  
Arhgap20  
Arhgap21  
Arhgap23  
Arhgdia  
Arhgdig  
Arhgef10l  
Arhgef11  
Arhgef16  
Arhgef5  
Arid4a  
Arih1  
Arl8a  
Arnt2  
Arsg  
Ascl1  
Asf1a  
asp3  
Aspax1  
Asphd2  
Astl  
Asth2  
Asx1  
Atf1  
Atg12  
Atl2  
Atmin  
Atn1  
Atoh7  
Atp1a3  
Atp1b1  
Atp2a2  
Atp5h  
Atp6v0b  
Atp6v1a  
Atp6v1e2  
Atp8a1  
Atxn7  
Aurkaip1

Aven  
AW555464  
Axin1  
Axin2  
B130006D01Rik  
B230219D22Rik  
B230339M05Rik  
B330016D10Rik  
B3gat1  
B4galt2  
B4galt4  
B830017H08Rik  
B930041F14Rik  
Bach2  
Bag5  
Bai3  
Banp  
Bara  
Barhl2  
Barx1  
Baz1a  
Bbip1  
BC020535  
BC021891  
BC027696  
BC029726  
BC030050  
BC030307  
BC035532  
BC046404  
BC048612  
BC050254  
BC051589  
BC053974  
BC056189  
BC060302  
BC062820  
BC065149  
BC070425  
BC089491  
BC099561  
BC145376



Bcap29  
Bcl10  
Bcl11b  
Bcl2  
Bcl7a  
Bcl7c  
Bcng-1  
Bcr  
Bend3  
Bend4  
Bend6  
Bend7  
Bfsp1  
Bhlhe22  
Bhlhe41  
Bles03  
Bloc1s2  
Bloc1s3  
Blvrb  
Bmp2  
Bmp2k  
Bmp6  
Bmpr2  
Bnc1  
Boc  
Bod1  
Boll  
Bpag1  
Brd3  
Brd4  
Brix1  
Brpf3  
Brsk2  
Bsn  
Btbd6  
Btbd7  
Btg3  
Bves  
Bzw1  
C030046E11Rik  
C130074G19Rik  
C130080G10Rik

C1galt1  
C1ql1  
C1qtnf4  
C2cd4a  
C2cd4b  
C530028O21Rik  
Cables1  
Cables2  
Cabp7  
Cachd1  
Cacna1a  
Cacna1b  
Cacna1c  
Cacna1h  
Cacna2d2  
Cacna2d3  
Cacnb4  
Cacng4  
Cadm1  
Cadm2  
Cadps  
Cadps2  
Calm2  
Caln1  
Camk2b  
Camk2n1  
Camk2n2  
cAMP-GEFII  
Camsap1  
Camta1  
Camta2  
Caprin1  
Car15  
Car5a  
Card10  
Card6  
Cars2  
Casc4  
Casd1  
Caskin1  
Cbfa2t2  
Cbln1

Cbx2  
Cbx7  
Ccdc109a  
Ccdc126  
Ccdc3  
Ccdc6  
Ccdc88c  
Ccne2  
Ccnk  
Ccnl1  
Ccnyl1  
Ccr10  
Cd2bp2  
Cd44  
Cd8a  
Cdc34  
Cdc42bpa  
Cdc42bpb  
Cdc42ep1  
Cdc73  
Cdcrel-1  
Cdh22  
Cdh4  
Cdhr3  
Cdk14  
Cdk2ap1  
Cdk4  
Cdk5r1  
Cdk5r2  
Cdk5rap1  
Cdk8  
Cdkn1c  
Cds1  
Cdv3  
Cdx1  
Cdy1  
Cdy12  
Cebpa  
Cebpb  
Cecr2  
Cecr6  
Celf1

Celf2  
Celf4  
Celsr1  
Celsr2  
Celsr3  
Cenpb  
Cfr  
Chchd7  
Chd1  
Chd3  
Chd5  
Chd7  
Chic2  
Chmp2a  
Chmp4b  
Chn1  
Chpt1  
Chrd12  
Chrm3  
Chrm5  
Chrna4  
Chrna7  
Chst2  
Chsy3  
Chtf8  
Cic  
Cirbp  
Cirh1a  
Cisd2  
Cisk  
Cited4  
Ckap4  
Cldn9  
Clip4  
Clstn1  
Clstn2  
Cmtm4  
Cnga1  
Cnih  
Cnn2  
Cnm1  
Cnm3

Cnnm4  
Cnot6l  
Cnr1  
Cntfr  
Cntnap1  
Cobl  
Col19a1  
Col23a1  
Col6a6  
Col8a2  
Copg2  
Coq10a  
Coro1c  
Coro2a  
Coro2b  
Cpne5  
Crebzf  
Crhbp  
Crim1  
Crls1  
Crmp1  
Crtac1  
Crtc3  
Cryzl1  
Csad  
Csda  
Csnk1e  
Csnk1g2  
Cspg5  
Ctbp1  
Ctf1  
Ctf2  
Ctnna2  
Ctnnb1  
Ctnnbip1  
Ctnnd2  
Cuedc1  
Cux2  
Cxxc4  
Cyb561  
Cyfip2  
Cyhr1

Cyp4f14  
Cys1  
D17Wsu92e  
D430050G20  
D930015E06Rik  
D930048N14Rik  
Dab1  
Dact2  
DAPK2  
Dapk3  
Dazl  
Dcbld2  
Dchs1  
Dclk3  
Dcun1d1  
Ddr1  
Ddx25  
Ddx43  
Ddx6  
Dennd1b  
Dennd2a  
Dennd5a  
Dennd5b  
Depdc7  
Dgkh  
Dgki  
Dgkz  
Dhrs4  
Dicer1  
Dio2  
Dio3  
Dio3os  
Dip2a  
Dip2c  
Diras1  
Dlg1  
Dlgap1  
Dlgap2  
Dlgap3  
Dlgap4  
Dlk2  
Dlk3

Dlx6  
Dlx6as  
Dlx6os1  
Dmpk  
Dmrt3  
Dmrta2  
Dmwd  
Dmxl2  
Dnaja2  
Dnajc11  
Dnajc21  
Dnajc25  
Dnajc4  
Dnttip1  
Doc2a  
Doc2b  
Dock5  
Dok6  
Dpf1  
Dph2  
Dpm1  
Dpy19l1  
DQ544838  
DQ558014  
DQ695223  
DQ700977  
DQ718008  
DQ720997  
DQ726379  
Drap1  
Drd2  
Dscam  
Dtnb  
Dtnbp1  
Dusp2  
Dusp28  
Dusp7  
Dusp8  
Dvl1  
Dvl3  
Dync2li1  
Dyrk2

E130012A19Rik  
E130018O15Rik  
E130203B14Rik  
E2f1  
E530011L22Rik  
Ebf3  
Ebf4  
Ece2  
Edr2 p36  
Efna2  
EG328479  
EG434280  
EG629133  
Egfl7  
Ehmt1  
Eid2  
Eif1a  
Eif2c4  
Eif4e  
Eif4e2  
Eif4e3  
Eif4enif1  
Eif4g1  
Eif4h  
Eif5  
Elfn1  
Elk3  
Elovl2  
Emid1  
Emzf1  
En2  
Enah  
Endog  
Entpd1  
Eomes  
Epb4.1l1  
Epc1  
Epcam  
Epha10  
Epha5  
Epha7  
Ephb1



Ephx4  
Erbp2ip  
Erich1  
Ero1l  
Esrra  
Evi5  
Evl  
Evx1  
Evx2  
Exoc3l2  
Ext1  
FAK  
Fam102b  
Fam108b  
Fam108b1  
Fam108c  
Fam113b  
Fam116b  
Fam123a  
Fam123c  
Fam125b  
Fam132b  
Fam155a  
Fam171a1  
Fam184a  
Fam190a  
Fam193b  
Fam19a5  
Fam20b  
Fam20c  
Fam49b  
Fam59b  
Fam69a  
Fam69c  
Fam73a  
Fam73b  
Fam78b  
Fam81a  
Fam83f  
Fancf  
Fastk  
Fbll1

Fbn2  
Fbrsl1  
Fbxl15  
Fbxl17  
Fbxl3  
Fbxo16  
Fbxo30  
Fbxo45  
Fcho1  
Fcho2  
Fermt2  
Fev  
Fgd5  
Fgf12  
Fgf18  
Fgf21  
Fgf8  
Fgf9  
Fign  
Fkbp2  
Fkbp5  
Fkbp7  
Fkrp  
FLRG  
Flt4  
Fmnl1  
Fndc5  
Fntb  
Foxa1  
Foxb2  
Foxd1  
Foxd2  
Foxd3  
Foxe1  
Foxe3  
Foxi3  
Foxj2  
Foxk1  
Foxl2  
Foxl2os  
Foxo1  
Foxo6

Foxq1  
Frat1  
Frs3  
Fsd2  
Fst  
Fstl3  
Ftl2  
Fut1  
Fxr2  
Fzd10  
Fzd6  
Fzd8  
Fzd9  
Gab2  
Gabpb1  
Gabra5  
Gabbr3  
Gabrg3  
Gak  
Gal3st1  
Gal3st3  
Galnt3  
Galnt9  
Galr3  
Gamt  
Gapvd1  
Gas2  
Gas7  
Gata2  
Gata6  
Gatad2a  
Gbx1  
Gclm  
Gcn1l1  
Gdf10  
Gdf7  
Gfer  
Gfi1  
Gfra4  
Ggh  
Gimap1  
Gimap5

Gimap6  
Gimap7  
Git2  
Gjc1  
Gjd2  
Gjd3  
Gje1  
Gkap1  
Glcci1  
Gldc  
Glis1  
Glrb  
Gm10638  
Gm11190  
Gm11529  
Gm1332  
Gm13375  
Gm1553  
Gm1568  
Gm16837  
Gm2694  
Gm3230  
Gm347  
Gm4983  
Gm5089  
Gm5098  
Gm5151  
Gm527  
Gm5577  
Gm6654  
Gm7244  
Gm757  
Gm766  
Gm962  
Gm98  
Gm9962  
Gmeb2  
Gna11  
Gna12  
Gnal  
Gnao1  
Gnaz

Gnb1  
Gnb2  
Gnb4  
Gng13  
Gng4  
Gng7  
Gnl3  
Gnptab  
Golga7  
Golga7b  
Gp1bb  
Gp5  
Gpam  
Gpc1  
Gpr12  
Gpr153  
Gpr25  
Gpr27  
Gpr45  
Gpr62  
Gpr88  
Gps1  
Gramd4  
Grasp  
Grb10  
Grb2  
Grid1  
Grid2  
Grin2c  
Grin2d  
Grip1  
Grk6  
Grsf1  
Grwd1  
Gsc  
Gsg1l  
Gsk3a  
Gsr  
Gtf2a1  
Gxylt2  
Gypc  
Gzmm

H1fx  
H2-Ab1  
H2afy  
Hand2  
Hcn1  
Hcn2  
Hcn4  
Hdac7  
Hdgf  
Hectd1  
Hecw2  
Heg1  
Hes1  
Hes3  
Heyl  
Higd1b  
Hipk1  
Hira  
Hivep1  
Hmg20b  
Hmgb2  
Hmx1  
Hmx3  
Homer2  
Hook1  
Hoxa10  
Hoxa4  
Hoxa5  
Hoxb2  
Hoxb3  
Hoxb4  
Hoxc13  
Hoxc9  
Hoxd1  
Hoxd11  
Hoxd12  
Hoxd13  
Hoxd3  
Hoxd8  
Hoxd9  
Hp1bp3  
Hras1

Hrh3  
Hrk  
Hs6st1  
Hs6st3  
Htr3a  
Htr6  
Htr7  
Htra4  
Hunk  
IAN5  
lca1l  
lgdcc3  
lgf2  
lgf2as  
lgf2bp2  
lgf2r  
lgfbp2  
lgfbp3  
lgfbpl1  
lgsf3  
lhh  
lkzf1  
lkzf2  
lkzf3  
ll1e  
ll1f6  
lldr2  
lna  
lnca1  
lng1  
lnhbb  
lno80  
lno80d  
lnpp5a  
lnpp5f  
lnsm1  
lnsm2  
lnsrr  
lpmk  
lpo5  
lrak-M  
lrak3

Irf5  
Irx1  
Irx2  
Irx4  
Isl1  
isl1-beta  
Itga6  
Itga9  
Itgb1bp3  
Itgb4  
Itgb5  
Itpka  
Itsn1  
Izumo1  
Jak2  
Jakmip3  
Jarid2  
Jdp2  
Jhdm1d  
Jmjd1c  
JSAP2  
Kbtbd13  
Kbtbd2  
Kcmf1  
Kcna1  
Kcna2  
Kcna3  
Kcna7  
Kcnc1  
Kcnc3  
Kcnd2  
Kcnd3  
Kcne4  
Kcng3  
Kcnh1  
Kcnh2  
Kcnh3  
Kcnip1  
Kcnj12  
Kcnj4  
Kcnk12  
Kcnk3



Kcnk9  
Kcnma1  
Kcnmb4  
Kcnq2  
Kcnq3  
Kcnq4  
Kcnq5  
Kcns1  
Kcns3  
Kcnt1  
Kctd1  
Kctd12  
Kctd2  
Kctd21  
Kctd6  
Kdm1a  
Kdm2b  
Khdc1a  
Khdc1c  
Khsrp  
Kiaa1432  
Kiaa1841  
Kif17  
Kif1c  
Kif27  
Kif2a  
Kif7  
Kifc2  
Kirrel2  
Kl  
Klf14  
Klf15  
Klf3  
Klhl2  
Klhl23  
Klhl29  
Klhl35  
Klri1  
Kpna3  
Kpna4  
Kras  
Krt4

Krt8  
Krtcap3  
L3mbtl3  
Lad1  
Lag3  
Lap3  
Larp1b  
Lats2  
Lbx1  
Lcor  
Ldlrad3  
Lefty2  
Lemd2  
Leprel1  
Lgi2  
Lhfp14  
Lhx2  
Lhx8  
Lif  
Lifr  
Limd1  
Limd2  
Lin28b  
Lin9  
Lmo1  
Lmx1b  
LOC100045653  
Lpar3  
LPCAT4  
Lpgat1  
Lphn3  
Lpin2  
Lpxn  
Lrfn1  
Lrfn5  
Lrp12  
Lrp3  
Lrp5  
Lrp6  
Lrp8  
Lrrc32  
Lrrc3b

Lrrc4  
Lrrc45  
Lrrc47  
Lrrc56  
Lrrc8b  
Lrrc8c  
Lrrc8d  
Lrrn2  
Ltbp4  
Ltk  
Luc7l3  
Luzp1  
Ly6h  
Lypd6  
Lypd6b  
Macf1  
MacroD2  
Mad2l2  
Mafa  
Mafb  
Mafg  
Mal2  
Maml1  
Man1a  
Man1a2  
Man2a2  
Maneal  
Manf  
Map3k3  
Map3k5  
Map3k7  
Map3k9  
Map4k2  
Map4k3  
Map4k4  
Mapk13  
Mapk1ip1  
Mapk4  
Mapk6  
Mapk8ip1  
Mapkapk2  
Mapkapk5

Mapt  
MARCH6  
MARCH7  
MARCH9  
Marcks  
Mark3  
Marveld1  
Mast2  
Matn2  
Matn4  
Maz  
Mbnl1  
Mboat2  
Mcm9  
Mdga1  
Me1  
Med12l  
Med21  
Mef2a  
Mex3c  
mFLJ00022  
Mfsd4  
Mfsd6  
Mgat3  
Mgat4a  
Mgat4b  
Mgat5b  
Mgl  
Micall1  
Mier1  
Mier2  
Mif4gd  
Mir10a  
Mir1247  
Mir181c  
Mir181d  
Mir1895  
Mir1901  
Mir1956  
Mir1967  
Mir3081  
Mir3091

Mir467f  
Mir762  
Miz1  
mKIAA0003  
mKIAA0044  
mKIAA0133  
mKIAA0137  
mKIAA0184  
mKIAA0387  
mKIAA0428  
mKIAA0429  
mKIAA0452  
mKIAA0558  
mKIAA0634  
mKIAA0656  
mKIAA1055  
mKIAA1286  
mKIAA1306  
mKIAA1560  
mKIAA1682  
mKIAA1820  
mKIAA1841  
mKIAA1971  
mKIAA1998  
mKIAA4187  
Mknk2  
Mll1  
Mll5  
Mllt1  
Mllt10  
Mllt6  
mlr2  
Mlst8  
MMET-1  
Mmgt2  
Mnk2  
Mnx1  
Mocs3  
Mogs  
Mov10  
Mpg  
Mphosph9

Mpi  
Mpp6  
Mprp  
Mras  
Mrpl40  
Mrpl53  
Ms4a8a  
Msi1  
Msi2  
Mta3  
Mtap2  
Mtap7  
Mtap7d1  
Mtmr12  
Mtmr7  
Mtss1  
Mtss1l  
Mxi1  
Myadml2  
Myb  
Mylpf  
Myo1f  
Myo5b  
Myo7a  
Myoz3  
Myrip  
Mzt1  
N28178  
N4bp1  
N4bp3  
Naa30  
Naa50  
Nab1  
Nacc2  
Nanos3  
Nat8l  
Nav2  
Nbea  
Nbl1  
Ncam2  
Nck2  
Ncor1

Ncor2  
Ncs1  
Ndr4  
Nefn  
Negr1  
Nek6  
Nek8  
Nell2  
Neto1  
Neto2  
Neurabin  
Neur1a  
Nexn  
Nfil3  
Nfkb2  
Nfkbia  
Nfyb  
Ngef  
Nipa1  
Nipal1  
Nkain2  
Nkd1  
Nktr  
Nkx2-1  
Nkx2-2  
Nkx2-2as  
Nkx2-3  
Nkx2-4  
Nkx6-2  
Nob1  
Nog  
Nos1ap  
Notum  
Nova2  
Noxo1  
Npas1  
Npas2  
Npas3  
Npb  
Npepl1  
Npepps  
Nphs1

Nphs2  
Npnt  
Nptxr  
Nr2c2  
Nr2f1  
Nr2f2  
Nr2f6  
Nr4a2  
Nr5a1  
Nrarp  
Nras  
Nrbp1  
Nrf1  
Nrg2  
Nrip1  
Nrxn2  
Nsf  
Nsg1  
Nsmaf  
nssr 1  
Nt5c2  
Ntn1  
Ntrk1  
Nudt14  
Nudt4  
Nup210  
Nup35  
O/E-4S  
OCT1  
Ogfrl1  
Olfm1  
Olf1093  
Olf1357  
Olf186  
Olf187  
Olf212  
Olf822  
Olig2  
Onecut2  
Oprd1  
Optn  
ORF61



Osbp2  
Osbp13  
Otub1  
Otud1  
Otud7a  
Otx1  
Ovol2  
Oxr1  
P4ha3  
Pak2  
Pank1  
Pank3  
Panx1  
Panx2  
Papd5  
Pappa  
Paqr9  
Pard3b  
Pard6b  
Parp12  
Parp8  
Pax1  
Pax3  
Pbp2  
Pbrm1  
Pbx1  
Pbx3  
Pcbp1  
Pcbp4  
Pcdh8  
Pcgf5  
Pclo  
Pcnx  
Pcsk2  
Pcsk6  
Pdcd7  
Pde3b  
Pde7a  
Pde8a  
Pdgfb  
Pdgfc  
Pdia2

Pdlim4  
Pds5a  
Pdxp  
Pdzk1  
Peg12  
Peli2  
Pex5l  
Pex7  
Pfn2  
Pgp  
Phactr2  
Phc2  
Phf17  
Phf3  
Phip  
Phlpp1  
Phox2a  
Phox2b  
Phtf2  
Phyhipl  
Pi4k2a  
Pias2  
Pid1  
Pigl  
Pik3cb  
Pip4k2a  
Pitpnm3  
Pkdcc  
Pkdrej  
Pkn1  
Pkn3  
Pkn3  
Pknox2  
Pla2g12a  
Pla2g2f  
Plag1  
Plaur  
Plcb3  
Plcg1  
Plcl2  
Plekha3  
Plekhh1  
Plekhn2

Plekho1  
Plin  
Plin1  
Plod1  
Plxdc1  
Plxna1  
Plxna4  
Plxnc1  
Plxnd1  
Pm20d2  
Podn  
Podxl  
Podxl2  
Pogk  
Pogz  
Polr2b  
Polr2l  
Pomgnt1  
Pou2f1  
Pou3f1  
Pou3f3  
Pou4f2  
Ppa2  
Ppara  
Pparg  
Ppfia1  
Ppm1a  
Ppm1h  
Ppm1n  
Ppp1r13b  
Ppp1r14b  
Ppp1r9a  
Ppp2cb  
Ppp2r2c  
Ppp2r2d  
Ppp2r5c  
Ppp4r2  
Ppp6r2  
Prdm10  
Prdm11  
Prdm13  
Prdm8

Prdm9  
Prex1  
Prima1  
Prkaa1  
Prkaa2  
Prkar1b  
Prkar2a  
Prkcb  
Prkce  
Prkg2  
Prkir  
Prmt8  
Prok2  
Prr16  
Prr18  
Prrc2b  
Prune2  
Psd  
Psme4  
Ptar1  
Ptbp2  
Ptgfrn  
Ptk2  
Ptms  
Ptov1  
Ptp4a2  
Ptp4a3  
Ptpla  
Ptpn11  
Ptpn21  
Ptpn6  
Ptprd  
Ptprj  
Ptprn2  
Ptprt  
Purg  
Pus3  
Pvr  
Pvr13  
Pvk  
Pycr1  
Pygo1

Qser1  
Rab11fip3  
Rab11fip4  
Rab11fip5  
Rab12  
Rab15  
Rab21  
Rab2a  
Rab35  
Rab3ip  
Rac3  
Rad1  
radical-fringe  
Rai1  
Ralgapb  
Ralgds  
Ralgps2  
Raly1  
Ran  
Ranbp17  
RANK  
Rap1a  
Rap2a  
Rapgef4  
Rasa2  
Rasgef1c  
Rasgrp2  
Rasip1  
Ras10b  
Raver2  
Rb1  
Rbfox3  
Rbm15b  
Rbm24  
Rbms1  
Rbpjl  
Rbpms  
Rbpms2  
Rcor1  
Rcor2  
Reep1  
Reep3

Reln  
Reps1  
Rest  
Ret  
Rev1  
Rfng  
Rftn1  
Rfwd2  
Rfx2  
Rgnef  
Rgs11  
Rgs20  
Rgs6  
Rgs7  
Rhbd1  
Rhbd13  
Rhoa  
Rhof  
Rhoq  
Rhou  
Rictor  
Rimk1a  
Rims1  
Rims3  
Rims4  
Riok2  
Rmnd5a  
Rnf130  
Rnf139  
Rnf145  
Rnf146  
Rnf157  
Rnf165  
Rnf180  
Rnf182  
Rnf208  
Rnpepl1  
Rock2  
Rpl3  
Rps21  
Rps6ka1  
Rps6kl1

Rrbp1  
Rspo1  
Rspo4  
Rtbdn  
Rtn-1A  
Rtn1  
Rtn2  
Rtn4r  
Rufy4  
Rundc3b  
Runx1t1  
Runx3  
Ryk  
Ryr2  
Sall1  
Sall3  
Samd5  
Sap30l  
Satb1  
Sbk1  
Scaf11  
Scarf2  
Scmh1  
Scn10a  
Scn1b  
Scrib  
Sct2  
Scube1  
Scube2  
Scx  
Sdc3  
Sdk2  
Sec24b  
Sema3c  
Sema6d  
Seps1  
SEPT3  
SEPT5  
SEPT9  
Sertad4  
Sestd1  
Set

Setd3  
Sez6  
Sfmbt1  
Sfrp2  
Sft2d2  
sgigsf  
Sgk3  
Sgpp1  
Sh3gl3  
Sh3glb1  
Sh3glb2  
Sh3pxd2a  
Sh3pxd2b  
Shank3  
Shc2  
Shc3  
She  
Shh  
Shisa9  
Shoc2  
Siah1a  
Sik1  
Sik3  
Sirpa  
Sirt1  
Six2  
Six3  
Six3os1  
Six6  
Skap1  
Skil  
Skor1  
Slc12a2  
Slc16a10  
Slc16a3  
Slc16a6  
Slc17a8  
Slc1a6  
Slc20a2  
Slc22a18  
Slc23a2  
Slc24a2





Sorl1  
Sort1  
Sos1  
Sox1  
Sox12  
Sox13  
Sox2  
Sox21  
Sox30  
Sox7  
Sp4  
Sp9  
Spag9  
Spast  
Spats2  
Spef1  
Spen  
Spin1  
Spire2  
Sbnb1  
Sbnb3  
Sbnb4  
Spns2  
Sppl3  
Spred1  
Spry1  
Src  
Srcin1  
Srgap1  
Srpk1  
Srsf10  
Srsf13b  
Srsf9  
Ssbp3  
Ssx2ip  
St7  
Stac  
Stard10  
Stat5a  
Stat5b  
Stil  
Stk24

Stk32c  
Ston2  
Stox2  
Stra13  
Strbp  
Strn4  
Stxbp5  
Suhw4  
Sult4a1  
Sumo2  
Sumo3  
Susd4  
Sybu  
Syde2  
Syn2  
Syngr1  
Syngr3  
Synpo  
Synrg  
Syp12  
Syt10  
Syt12  
Syt16  
Syt7  
Syt9  
Tac2  
Tacc1  
Taf5l  
Tal1  
Taok3  
Tarbp1  
Tbc1d10b  
Tbc1d2b  
Tbk1  
Tbkbp1  
Tbr1  
Tbrg3  
Tbx1  
Tbx2  
Tcap  
Tceb2  
Tcerg1l

Tcf15  
Tcf7  
Tcfap2e  
Tcta  
Tctex1d2  
Tctn3  
Tdrd5  
Tead1  
Tekt2  
Tesc  
Tesk1  
Tex2  
Tfdp1  
Tgfa  
Tgfbrap1  
Thap1  
Thoc4  
Thoc7  
Thpo  
Thra  
Tlcd1  
Tle1  
Tle4  
Tlk1  
Tlk2  
Tlx1  
Tlx2  
Tlx3  
Tm7sf3  
Tm9sf3  
Tmbim4  
Tmcc2  
Tmed7  
Tmem100  
Tmem108  
Tmem117  
Tmem121  
Tmem131  
Tmem132c  
Tmem132d  
Tmem151a  
Tmem151b

Tmem163  
Tmem178  
Tmem179  
Tmem189  
Tmem20  
Tmem200b  
Tmem30b  
Tmem56  
Tmem60  
Tmem8  
Tmf1  
Tmod2  
Tmpe  
Tmtc1  
Tmub1  
Tnfaip2  
Tnfaip6  
Tnfrsf11a  
Tnpo1  
Tns1  
Tomm6  
Tox  
Tox3  
Trabd  
Traf3  
Trafd1  
Trak1  
Trappc10  
Trappc6a  
Trhde  
Trim3  
Trim33  
Trim41  
Trim44  
Trim7  
Trnp1  
Trp53i13  
Trpc1  
Trpc3  
Trpm1  
Tspan4  
Tspan5

Tspyl5  
Ttbk1  
Ttc19  
Ttc34  
Ttc39a  
Ttc9  
Tub  
Twist1  
U46581  
Ubash3b  
Ubb  
Ube2d2b  
Ube2d3  
Ube2e1  
Ube2e2  
Ube2e3  
Ube2f  
Ube2j1  
Ube2m  
Ube2o  
Ube2q2  
Ube2t  
Ubl3  
Ubn2  
Ubqln1  
Ubr5  
Ugcg  
Unc45a  
Unc5a  
Unc5d  
Unc80  
Urb2  
Usp12  
Usp13  
Usp24  
Usp25  
Usp3  
Usp31  
Usp33  
Usp35  
Usp43  
Usp46

Usp48  
Utrn  
Vangl1  
Vav3  
Vax1  
Vax2  
Vax2os1  
Vax2os2  
Vdu1  
Vegfb  
Vegfc  
vesl-2  
Vgll2  
Vhl  
Vmn1r90  
Vps54  
Vstm2b  
Vstm2l  
Wbp1  
Wbp7  
Wdfy3  
Wdr4  
Wdr53  
Wdr78  
Wfdc3  
Wfdc5  
Whamm  
Wnt2b  
Wnt5b  
Wnt6  
Wnt7b  
Wnt9a  
Wrn  
Wsb2  
Wscd1  
Wt1  
Wwp2  
Xkr4  
Xpo7  
Xylt1  
Ybx1  
Ybx2

Yif1a  
Ypel5  
Zbed4  
Zbtb17  
Zbtb32  
Zbtb39  
Zbtb41  
Zbtb42  
Zbtb46  
Zbtb8a  
Zc3h12c  
Zc3h14  
Zc3h18  
Zc3h6  
Zdhhc14  
Zdhhc18  
Zdhhc2  
Zdhhc23  
Zdhhc8  
Zeb1  
Zfand6  
Zfp148  
Zfp161  
Zfp280d  
Zfp281  
Zfp282  
Zfp292  
Zfp318  
Zfp385b  
Zfp422  
Zfp423  
Zfp532  
Zfp592  
Zfp598  
Zfp641  
Zfp651  
Zfp706  
Zfp740  
Zfp746  
Zfp800  
Zfp804a  
Zfp839



Zfp91  
Zfyve28  
Zic2  
Zic5  
Zmynd11  
Zmynd19  
Znf280d  
Znf512b  
Znfx1  
Znrf1  
Zpbp2  
Zswim5  
Zswim7  
Zzz3

**10T**

0610010F05Rik  
1110006O24Rik  
1110059E24Rik  
1190002N15Rik  
1190005I06Rik  
1500012F01Rik  
1600002K03Rik  
1600014C23Rik  
1600021P15Rik  
1700010M22Rik  
1700019N12Rik  
1700109F18Rik  
1810041L15Rik  
2010300C02Rik  
2310002J15Rik  
2410004B18Rik  
2610017I09Rik  
2700081O15Rik  
2700086A05Rik  
2810459M11Rik  
2900092D14Rik  
3830408C21Rik  
4930488L21Rik  
4930539J05Rik  
4930588N13Rik  
4931429I11Rik  
4932435O22Rik  
4933403G14Rik  
4933406I18Rik  
5031439G07Rik  
5930412G12Rik  
6430704M03Rik  
9030409G11Rik  
9230105E10Rik  
9330171B17Rik  
9430021M05Rik  
9430083A17Rik  
A030009H04Rik  
A230083G16Rik  
A530013C23Rik  
A930007I19Rik  
AA415398  
Aard  
Accn1  
Actr2  
Acvr1b  
Acvr2a  
Acvr2b

Adam11  
Adamts20  
Adap1  
Adcy2  
Adcy5  
Adra2a  
Adra2c  
Adrb1  
Adrbk2  
Aes  
Aff3  
Agap1  
Agpat3  
AI314180  
AI314831  
AI316807  
Aig1  
Ajap1  
AK003136  
AK005214  
AK005503  
AK006001  
AK007571  
AK009335  
AK010870  
AK011568  
AK013046  
AK014224  
AK015004  
AK015492  
AK016097  
AK016591  
AK016772  
AK016788  
AK017177  
AK017779  
AK017924  
AK019375  
AK019514  
AK019838  
AK021004  
AK029023  
AK029443  
AK031498  
AK033147  
AK035754  
AK035982  
AK036329  
AK037260

AK038079  
AK039014  
AK039268  
AK039284  
AK039417  
AK039608  
AK039882  
AK040320  
AK041531  
AK043505  
AK043607  
AK044036  
AK045070  
AK046216  
AK047558  
AK048292  
AK051417  
AK053193  
AK075633  
AK076706  
AK079280  
AK079802  
AK080278  
AK080292  
AK080648  
AK081136  
AK081497  
AK083606  
AK084517  
AK085371  
AK085522  
AK131739  
AK132723  
AK133391  
AK133446  
AK135560  
AK135691  
AK140072  
AK140446  
AK142074  
AK142386  
AK144823  
AK145301  
AK146255  
AK147796  
AK148461  
AK149188  
AK155239  
AK158619

AK159003  
AK159035  
AK161590  
AK162774  
AK163532  
AK163592  
AK166060  
AK190497  
AK191498  
AK197782  
AK211336  
Ak5  
Akd2  
Aktip  
Aldh1a2  
Alg8  
Amfr  
Amigo1  
Amigo2  
Anapc11  
Ank  
Ankk1  
Ankmy1  
Ankrd13b  
Ankrd42  
Ankrd52  
Anp32b  
Apba2  
ApoH  
Aqp5  
Arap2  
Arglu1  
Arhgap20  
Arhgap21  
Arhgap23  
Arhgdia  
Arhgdig  
Arhgef10l  
Arhgef11  
Arid4a  
Arl8a  
Arntl  
asp3  
Aspax1  
Asphd2  
Astin2  
Asxl1  
Atf1  
Atl2

Atrmin  
Atn1  
Atoh7  
Atp1a3  
Atp2a2  
Atp5h  
Atp6v0b  
Atxn7  
AW555464  
B230339M05Rik  
B3gat1  
B830017H08Rik  
B930041F14Rik  
Bach2  
Bai3  
Banp  
Barhl2  
Barx1  
Bbip1  
BC021891  
BC027696  
BC029726  
BC035532  
BC046404  
BC053974  
BC056189  
BC060302  
BC062820  
BC070425  
BC099561  
Bcap29  
Bcl10  
Bcl2  
Bcl7c  
Bcng-1  
Bcr  
Bend4  
Bend6  
Bend7  
Bfsp1  
Blvrb  
bmal1b  
Bmp2  
Bmp2k  
Bmp6  
Bnc1  
Boc  
Boll  
Bpag1

Brix1  
Brsk2  
Btbd1  
Btbd7  
Btg3  
Bves  
Bzw1  
C030046E11Rik  
C1galt1  
C1ql1  
C1qtnf4  
C2cd4b  
C530028O21Rik  
Cables2  
Cabp7  
Cacna2d3  
Cacng4  
Cadm1  
Cadm2  
Cadps  
Cadps2  
Camk2b  
Camk2n1  
cAMP-GEFII  
Camsap1  
Camta1  
Camta2  
Capn9  
Car15  
Car5a  
Card10  
Cars2  
Caskin1  
Cbx2  
Cbx7  
Ccdc126  
Ccdc3  
Ccdc6  
Ccne2  
Ccno  
Ccnyl1  
Ccr10  
Cd2ap  
Cd2bp2  
Cd44  
Cdc34  
Cdc42bpa  
Cdc42bpb  
Cdc42ep1

Cdc73  
Cdcrel-1  
Cdh22  
Cdh4  
Cdk14  
Cdk2ap1  
Cdk5r1  
Cdk5r2  
Cdk8  
Cds1  
Cdv3  
Cdx1  
Cdy1  
Cebpa  
Celf2  
Celf4  
Celsr1  
Chad  
Chchd7  
Chd1  
Chd3  
Chd5  
Chic2  
Chmp2a  
Chn1  
Chpt1  
Chrna7  
Chst2  
Ckap4  
Cldn9  
Clip4  
Clstn1  
Clstn2  
Cnn2  
Cnnm1  
Cnnm3  
Cnnm4  
Cnot6l  
Cnr1  
Cntnap1  
Cobl  
Col23a1  
Coro2a  
Crhbp  
Crls1  
Crtac1  
Cryz1  
Csad  
Csda



Csnk1e  
Csnk1g2  
Csnk1g3  
Cspg5  
Csrnp3  
Ctbp1  
Ctdspl  
Ctf1  
Ctf2  
Ctnnb1  
Ctnnd2  
Ctsh  
Cuedc1  
Cyhr1  
Cyp2c44  
Cyp4f14  
D17Wsu92e  
D430050G20  
DAPK2  
Dazl  
Dcbl2  
Dchs1  
Dcun1d1  
Dennd5a  
Dicer1  
Dio3  
Dio3os  
Dip2c  
Dlgap1  
Dlgap2  
Dlgap3  
Dlx6  
Dlx6as  
Dlx6os1  
Dmrta2  
Dmwd  
Dmxl2  
Dnaja2  
Dnajc21  
Dncic2  
Dnttip1  
Doc2b  
Dock5  
Dph2  
DQ544838  
DQ558014  
DQ695223  
DQ700977  
DQ718008

DQ726379  
Drd2  
Dscam  
Dtnb  
Dtnbp1  
Dusp28  
Dusp7  
Dusp8  
Dvl1  
Dync1i2  
E130018O15Rik  
E130203B14Rik  
E530011L22Rik  
Ebf3  
Ebf4  
Edr2 p36  
Efna2  
EG629133  
Egfem1  
Eid2  
Eif2c4  
Eif4e  
Eif4e2  
Eif4enif1  
Eif4g1  
Eif4h  
Eif5  
Elfn1  
Elk3  
Elovl2  
Emzf1  
En2  
Epb4.1l1  
Epc1  
Epha5  
Erbb2ip  
Esrra  
Evi5  
Evl  
Evx1  
Evx2  
Ext1  
FAK  
Fam102b  
Fam108b  
Fam108b1  
Fam108c  
Fam113b  
Fam125b

Fam184a  
Fam190a  
Fam193b  
Fam19a5  
Fam20b  
Fam49b  
Fam69a  
Fam73a  
Fam73b  
Fam78b  
Fam83f  
Fancf  
Fastk  
Fbl1  
Fbrsl1  
Fbxl15  
Fbxl17  
Fbxl3  
Fbxo45  
Fcho2  
Fchsd2  
Fermt2  
Fgf12  
Fgf8  
Fign  
Fkbp2  
Fkbp5  
Fkbp7  
Fmn1  
Fndc5  
Foxa1  
Foxd1  
Foxd3  
Foxe1  
Foxj3  
Foxk1  
Foxl2os  
Fsd2  
Fzd10  
Fzd6  
Gab2  
Gabra5  
Gabbr3  
Gak  
Gal3st1  
Gal3st3  
Gas2  
Gata2  
Gata6

Gatad2a  
Gbx1  
Gdf7  
Gfer  
Gfi1  
Gfra4  
Ggh  
Gimap1  
Gimap5  
Gimap6  
Gimap7  
Glcci1  
Glis1  
Gm10638  
Gm13375  
Gm347  
Gm4983  
Gm5098  
Gm527  
Gm5577  
Gm757  
Gmeb2  
Gna12  
Gnao1  
Gng13  
Gnl3  
Gp1bb  
Gp5  
Gpc1  
Gpr115  
Gpr12  
Gpr153  
Gpr27  
Gpr45  
Gpr62  
Gprc5a  
Gps1  
Gramd4  
Grasp  
Grb10  
Grb2  
Grid1  
Grid2  
Grin2c  
Grin2d  
Grip1  
Grk6  
Grsf1  
Grwd1

Gsk3a  
Gstz1  
Gypc  
Gzmm  
H1fx  
H60b  
Hand2  
Hcn1  
Hcn2  
Hdgf  
Hes1  
Heyl  
Higd1b  
Hipk1  
Hira  
Hist2h3c1  
Hivep1  
Hmgb2  
Hmx1  
Homer2  
Hook1  
Hoxa4  
Hoxd11  
Hoxd12  
Hoxd13  
Hoxd3  
Hoxd8  
Hoxd9  
Hp1bp3  
Hras1  
Hrk  
Hs6st1  
Hspa12b  
Htr7  
Htra4  
IAN5  
Ica1l  
Igf2  
Igf2as  
Igf2bp2  
Igf2r  
Igfbp3  
Ikzf1  
Ildr2  
Ina  
Inca1  
Inhbb  
Ino80  
Ino80d

Insrr  
Ipo5  
Irf5  
Irx2  
Irx4  
Itga9  
Itgb5  
Itsn1  
Jak2  
Jdp2  
Jhdm1d  
Jmjd1c  
JSAP2  
Kbtbd13  
Kbtbd2  
Kcna2  
Kcnd2  
Kcne4  
Kcng3  
Kcnh2  
Kcnh3  
Kcnk3  
Kcnk9  
Kcnmb4  
Kcnq2  
Kcnq4  
Kcnq5  
Kcns1  
Kctd2  
Kctd21  
Kctd6  
Kdm2b  
Khdc1a  
Khdc1c  
Khsrp  
Kiaa1432  
Kiaa1841  
Kif1c  
Kif27  
Kif2a  
Kifc2  
Klf14  
Klf15  
Klhl2  
Klhl22  
Klhl23  
Klhl35  
Kpna3  
Kras

Krcc1  
Krt8  
Lag3  
Lap3  
Larp1b  
Lbx1  
Lcor  
Lemd2  
Leprel1  
Lgi2  
Lhx8  
Lifr  
Limd1  
Limd2  
Lin28b  
Lmo1  
Lmo3  
Lmx1b  
Lpgat1  
Lrp12  
Lrp3  
Lrp5  
Lrp8  
Lrrc32  
Lrrc3b  
Lrrc4  
Lrrc43  
Lrrc56  
Lrrc8b  
Lrrc8c  
Ltbp4  
Ltk  
Luzp1  
Lypd6b  
Macf1  
Macro2  
Mafg  
Mal2  
Maml1  
Man1a2  
Man2a2  
Man2c1  
Maneal  
Manf  
Map3k9  
Map4k2  
Map4k3  
Mapk13  
Mapk1ip1

Mapk4  
Mapk8ip1  
Mapkapk5  
Marcks  
Marveld1  
Matn4  
Maz  
Me1  
Mecom  
Med21  
Mex3c  
mFLJ00022  
Mfsd9  
Mgat3  
Mgat4a  
Mgat4b  
Mgl1  
Micall1  
Mier2  
Mif4gd  
Mir1247  
Mir181c  
Mir181d  
Mir1956  
Mir3081  
Mir762  
mKIAA0044  
mKIAA0133  
mKIAA0137  
mKIAA0210  
mKIAA0452  
mKIAA0634  
mKIAA0769  
mKIAA1306  
mKIAA1682  
mKIAA1841  
mKIAA1994  
Mknk2  
mlr2  
MMET-1  
Mmgt2  
Mnk2  
Mogs  
Mphosph9  
Mpp6  
Mprp  
Mrpl40  
Mrpl53  
Ms4a8a



Msi1  
Mta1  
Mta3  
Mtap7  
Mtap7d1  
Mtmr12  
Mtss1l  
Mxi1  
Myb  
Myh2  
Myh8  
Mylpf  
Myo5b  
Myrip  
N28178  
Naa30  
Nacc2  
Nanos3  
Nat8l  
Nbea  
Ncam2  
Nck2  
Ncor2  
Ncs1  
Neil1  
Nek6  
Neto2  
Neurabin  
Nfil3  
Nfkb2  
Nfyb  
Ninj1  
Nipa1  
Nkain2  
Nkd1  
Nkx2-1  
Nkx2-2  
Nkx2-2as  
Nkx2-4  
Nkx6-2  
Nob1  
Noxo1  
Npas2  
Npb  
Npepl1  
Npepps  
Npnt  
Nr2f1  
Nr2f2

Nr2f6  
Nr4a2  
Nr5a1  
Nras  
Nrbp1  
Nrg2  
Nrg3  
Nrip1  
Nrsn2  
Nsf  
Nsmaf  
nssr 1  
Nt5c2  
Ntrk1  
Nudt14  
O/E-4S  
Odf4  
Ogfrl1  
Olfm1  
Olf1305  
Olf1513  
Olf212  
Olf214  
Olf215  
Onecut2  
oppo 1  
ORF61  
Osbp13  
Otud7a  
Otx1  
P2ry1  
Papd5  
Pappa  
Paqr9  
Pax1  
Pbrm1  
Pbx1  
Pbx3  
Pcbp1  
Pcbp4  
Pcdha1  
Pcnx  
Pcsk2  
Pcsk6  
Pde3b  
Pde7a  
Pde8a  
Pdgfb  
Pdia2

Pds5a  
Pdxp  
Peg12  
Pex5l  
Phc2  
Phf13  
Phf17  
Phlpp1  
Phox2b  
Phtf2  
Pik3cb  
Pitpnm3  
Pkdcc  
Pkn1  
Pknx2  
Plag1  
Plcb3  
Plcl2  
Plekha3  
Plekhm2  
Plekho1  
Plxdc1  
Plxna1  
Plxnc1  
Plxnd1  
Podxl2  
Pomgnt1  
Pomt2  
Poteg  
Pou3f1  
Pou3f3  
Ppfia1  
Ppp1r13b  
Ppp1r14b  
Ppp1r9a  
Ppp2cb  
Ppp2r2c  
Ppp2r2d  
Ppp2r5c  
Ppp6r2  
Prdm10  
Prdm11  
Prdm13  
Prdm8  
Prima1  
Prkaa1  
Prkar1b  
Prkar2a  
Prkcb

Prkce  
Prkg2  
Prmt8  
Prr16  
Prrc2b  
Prss42  
Prune2  
Psd  
Psme4  
Ptgfrn  
Ptk2  
Ptms  
Ptp4a2  
Ptp4a3  
Ptprd  
Ptprt  
Purg  
Pvr  
Pvr13  
Pvk  
Pycr1  
Pygo1  
Qser1  
Rab11fip4  
Rab11fip5  
Rab12  
Rab15  
Rab21  
Rab35  
Rab3ip  
Rac3  
Rad1  
radical-fringe  
Raet1a  
Raet1e  
Ralgapb  
Ralgps2  
Raly1  
RANK  
Rap2a  
Rapgef4  
Rasa2  
Rasgef1c  
Rasgrp2  
Rasip1  
Ras10b  
Rb1  
Rbm15b  
Rbm24

Rbms1  
Rbp3  
Rbpjl  
Rbpms2  
Reep3  
Reln  
Reps1  
Rest  
Rev1  
Rfng  
Rgs11  
Rhou  
Rimkla  
Rims1  
Rims4  
Riok2  
Rmnd5a  
Rnf130  
Rnf139  
Rnf145  
Rnf146  
Rnf157  
Rnf165  
Rnf180  
Rnf208  
Rnf6  
Rnpepl1  
Rock2  
Rrbp1  
Rsad1  
Rtn-1A  
Rtn1  
Rtn4r  
Rufy4  
Runx1t1  
Runx3  
Ryk  
Ryr2  
Sall3  
Samd5  
Satb1  
Sbk1  
Scmh1  
Scn10a  
Scrib  
Sdk2  
SEPT3  
SEPT5  
Serpib1b

Sertad4  
Sestd1  
Sfmbt1  
sgigsf  
Shc3  
Shoc2  
Siah1a  
Sik1  
Sirpa  
Sirt1  
Six2  
Six3  
Six3os1  
Skor1  
Slc20a2  
Slc23a2  
Slc24a3  
Slc26a4  
Slc30a4  
Slc35d1  
Slc35e1  
Slc44a1  
Slc6a11  
Slc6a4  
Slc9a2  
Slit3  
Slk  
Smad4  
Smap1  
Smarcc2  
Smc5  
Smurf1  
Smyd1  
Sncaip  
Snora28  
Snord12  
Snrk  
Snx24  
Snx9  
Sorl1  
Sort1  
Sos1  
Sox1  
Sox12  
Sox2  
Sox30  
Spag9  
Spast  
Spats2

Spef1  
Spen  
Spin1  
Sbnb3  
Sbnb4  
Spns2  
Sppl3  
Spred1  
Src  
Srgap1  
Srsf10  
Srxn1  
Ssbp3  
Stk24  
Strbp  
Stxbp5  
Suhw4  
Sumo2  
Susd4  
Synrg  
Syt10  
Syt16  
Syt7  
Syt9  
Tacc1  
Taf5l  
Tbc1d10b  
Tbc1d5  
Tbk1  
Tbkbp1  
Tbr1  
Tbrg3  
Tbx2  
Tcap  
Tceb2  
Tcerg1l  
Tcf7  
Tcfap2e  
Tctex1d2  
Tdrd3  
Tdrd5  
Tead1  
Tesk1  
Tfdp1  
Tgfbrap1  
Thap1  
Thoc4  
Thoc7  
Thpo

Tle1  
Tle4  
Tlk1  
Tm7sf3  
Tmcc2  
Tmem100  
Tmem117  
Tmem121  
Tmem132c  
Tmem132d  
Tmem151a  
Tmem189  
Tmem20  
Tmem200b  
Tmem60  
Tmtc1  
Tmub1  
Tnfaip6  
Tnfrsf11a  
Tnp01  
Tns1  
Tox3  
Trabd  
Traf3  
Trappc10  
Trim41  
Trim44  
Trim7  
Trmt12  
Trpc3  
Tsc22d1  
Tspan5  
Ttbk1  
Ttc33  
Ttc34  
Ttc39a  
Tub  
Ube2d2b  
Ube2d3  
Ube2e1  
Ube2e2  
Ube2e3  
Ube2m  
Ubl3  
Ubn2  
Ubqln1  
Ubr5  
Ubxn11  
Ugcg



Unc5a  
Unc5d  
Usp12  
Usp24  
Usp3  
Usp31  
Usp33  
Usp35  
Usp46  
Usp48  
Vax1  
Vdu1  
Vegfc  
vesl-2  
Vmn1r90  
Vps54  
Vstm2b  
Vstm2l  
Wbp1  
Wdfy3  
Wdr53  
Wfdc3  
Wnt5b  
Wnt7b  
Wnt9a  
Wrn  
Wsb2  
Wscd1  
Wt1  
Wwp2  
Xkr4  
Xpo7  
Xylt1  
Ybx1  
Ybx2  
Yif1a  
Ypel5  
Zbed4  
Zbtb17  
Zbtb39  
Zbtb46  
Zbtb8a  
Zc3h12c  
Zc3h18  
Zc3h6  
Zdhhc18  
Zdhhc23  
Zeb1  
Zfp161

Zfp280d  
Zfp281  
Zfp282  
Zfp318  
Zfp385b  
Zfp407  
Zfp532  
Zfp592  
Zfp598  
Zfp651  
Zfp740  
Zfp746  
Zfp804a  
Zic5  
Zmynd11  
Zmynd19  
Znf280d  
Znf512b  
Znfx1  
Zswim5  
Zzz3

**iMF1**

0610010F05Rik  
1110006O24Rik  
1110059E24Rik  
1190002N15Rik  
1500012F01Rik  
1600002K03Rik  
1600021P15Rik  
1700010M22Rik  
1700019N12Rik  
1700034H15Rik  
1700109F18Rik  
1810041L15Rik  
2010300C02Rik  
2310002J15Rik  
2410004B18Rik  
2610017I09Rik  
2610507B11Rik  
2700081O15Rik  
2700086A05Rik  
2900092D14Rik  
3830408C21Rik  
4833424O15Rik  
4930426L09Rik  
4930488L21Rik  
4930539J05Rik  
4931429I11Rik  
4933406I18Rik  
5031439G07Rik  
5930412G12Rik  
6430704M03Rik  
9030409G11Rik  
9330171B17Rik  
9330182L06Rik  
9430021M05Rik  
9430083A17Rik  
9930021D14Rik  
A030009H04Rik  
A230083G16Rik  
A730018C14Rik  
A930007I19Rik  
AA415398  
AA960436  
Aard  
Abcb4  
Accn1  
Actr2  
Acvr1b  
Acvr2a

Acvr2b  
Adamts20  
Adap1  
Adcy2  
Adcy5  
Adra1b  
Adra2a  
Adra2c  
Adrb1  
Adrbk2  
Adss  
Aff3  
Agap1  
Agpat3  
AI314831  
AI316807  
AI504432  
Aig1  
Ajap1  
AK005214  
AK005503  
AK006001  
AK007174  
AK007571  
AK007998  
AK009335  
AK010870  
AK011568  
AK011684  
AK013046  
AK014224  
AK015004  
AK015492  
AK016097  
AK016591  
AK016734  
AK016788  
AK017177  
AK017779  
AK017924  
AK018929  
AK019514  
AK019838  
AK031498  
AK031561  
AK035754  
AK035982  
AK036329  
AK037260

AK038079  
AK039014  
AK039268  
AK039417  
AK039608  
AK039882  
AK040320  
AK041531  
AK043607  
AK044036  
AK045070  
AK046216  
AK047558  
AK047727  
AK048292  
AK052909  
AK053193  
AK075633  
AK076706  
AK079280  
AK080278  
AK080292  
AK080648  
AK081136  
AK081497  
AK084517  
AK085371  
AK085522  
AK131739  
AK132723  
AK133391  
AK134673  
AK135560  
AK135691  
AK138755  
AK140072  
AK140446  
AK142074  
AK142386  
AK144823  
AK145301  
AK147796  
AK148461  
AK149188  
AK154406  
AK158619  
AK159003  
AK161590  
AK162519

AK162774  
AK162942  
AK163103  
AK163532  
AK163592  
AK166060  
AK190497  
AK191498  
AK197782  
AK211336  
AK216824  
Ak5  
Akap7  
Akd2  
Aktip  
Aldh1a2  
Amd2  
Amfr  
Amigo1  
Amigo2  
Anapc11  
Ank  
Ankrd13b  
Ankrd29  
Ankrd34b  
Ankrd40  
Ankrd52  
Anp32b  
Ap3s1  
Apba2  
Aplp1  
Aqp5  
Arap2  
Arglu1  
Arhgap20  
Arhgap21  
Arhgap23  
Arhgdia  
Arhgdib  
Arhgdig  
Arhgef10l  
Arhgef11  
Arhgef16  
Arid4a  
Arih1  
Arl8a  
asp3  
Aspax1  
Asphd2

Astn2  
Asxl1  
Atf1  
Atg12  
Atl2  
Atn1  
Atoh7  
Atp10b  
Atp5h  
Atxn7  
AW555464  
Axin1  
B230339M05Rik  
B3gat1  
B830017H08Rik  
B930041F14Rik  
Bach2  
Bahd1  
Bai3  
Banp  
Barhl2  
Barx1  
Bbip1  
BC021891  
BC027696  
BC029726  
BC035532  
BC046404  
BC053974  
BC056189  
BC060302  
BC062820  
BC070425  
BC099561  
Bcap29  
Bcl10  
Bcl2  
Bcng-1  
Bcr  
Bend4  
Bend6  
Bend7  
Bfsp1  
Blvrb  
Bmp2  
Bmp2k  
Bnc1  
Boll  
Bpag1

Brd3  
Brix1  
Brpf3  
Brsk2  
Btd7  
Btg3  
Bves  
Bzw1  
C030046E11Rik  
C130074G19Rik  
C1galt1  
C1ql1  
C1qtnf4  
C2cd4b  
Cables2  
Cabp7  
Cacna1b  
Cacna1c  
Cacna2d3  
Cacng4  
Cadm1  
Cadps  
Cadps2  
Calm2  
cAMP-GEFII  
Camsap1  
Car15  
Car5a  
Casd1  
Caskin1  
Cbx2  
Ccdc3  
Ccdc6  
Ccne2  
Ccny1  
Cdc34  
Cdc42bpa  
Cdc42bpb  
Cdc42ep1  
Cdc73  
Cdcrel-1  
Cdh4  
Cdk14  
Cdk2ap1  
Cdk5r1  
Cdk5r2  
Cdk8  
Cds1  
Cdv3



Cdx1  
Cdyl  
Cecr2  
Celf2  
Celf4  
Celsr1  
Cenpb  
Chad  
Chchd7  
Chd3  
Chd5  
Chic2  
Chmp2a  
Chn1  
Chpt1  
Chrm3  
Chrm5  
Chrna7  
Chst2  
Ckap4  
Cldn15  
Clip4  
Clstn1  
Clstn2  
Cnga1  
Cnn2  
Cnnm1  
Cnnm3  
Cnnm4  
Cnr1  
Cntfr  
Cobl  
Col23a1  
Coro2a  
Crls1  
Crmp1  
Crtac1  
Cryzl1  
Csad  
Csa  
Csnk1e  
Csnk1g2  
Csnk1g3  
Cspg5  
Cst9  
Ctbp1  
Ctnnb1  
Ctnnd2  
Cuedc1

Cyhr1  
D17Wsu92e  
D430050G20  
Dapk1  
Dazl  
Dcblid2  
Dchs1  
Dcun1d1  
Dennd1b  
Dennd2a  
Dennd5a  
Dgkh  
Dicer1  
Dio3  
Dio3os  
Dip2a  
Dlgap1  
Dlgap3  
Dmrt3  
Dmwd  
Dmxl2  
Dnaja2  
Dnajc21  
Dnttip1  
Doc2b  
Dock3  
Dock5  
DQ544838  
DQ558014  
DQ695223  
DQ700977  
DQ718008  
DQ720997  
DQ726379  
Drd2  
Dscam  
Dtnb  
Dtnbp1  
Dusp28  
Dusp7  
Dusp8  
Dvl1  
E130018O15Rik  
E130203B14Rik  
Ebf3  
Ebf4  
Edr2 p36  
Efna2  
EG629133

Eid2  
Eif2c4  
Eif4e  
Eif4e2  
Eif4enif1  
Eif4g1  
Eif4h  
Eif5a2  
Elf5  
Elfn1  
Elk3  
Elov12  
Emzf1  
En2  
Epb4.111  
Epc1  
Epha5  
Eps8  
Erb2ip  
Esrra  
Evi5  
Evl  
Evx1  
Evx2  
Exoc3l2  
Ext1  
FAK  
Fam102b  
Fam108b  
Fam108b1  
Fam108c  
Fam113b  
Fam125b  
Fam155a  
Fam168b  
Fam184a  
Fam190a  
Fam19a5  
Fam49b  
Fam69a  
Fam69c  
Fam73b  
Fam78b  
Fancf  
Fastk  
Fbl1  
Fbn2  
Fbrs1  
Fbxl15

Fbxl17  
Fbxl3  
Fbxo16  
Fcho2  
Fchsd2  
Fermt2  
Fgd5  
Fgf12  
Fgf8  
Fign  
Fis1  
Fkbp5  
Fkbp7  
Fndc5  
Foxa1  
Foxd1  
Foxe1  
Foxi3  
Foxj3  
Foxk1  
Foxl2  
Foxl2os  
Fsd2  
Fzd10  
Fzd3  
Fzd9  
Gab2  
Gabra5  
Gabbr3  
Gal3st1  
Galnt3  
Gas2  
Gatad2a  
Gbx1  
Gclm  
Gcn111  
Gdf7  
Gfer  
Gfra4  
Gjc1  
Gkap1  
Glcci1  
Glis1  
Gm10638  
Gm13375  
Gm347  
Gm4983  
Gm527  
Gm5577

Gm757  
Gm98  
Gmeb2  
Gna12  
Gnao1  
Gnaq  
Gnas  
Gnl3  
Gp1bb  
Gpc1  
Gpr12  
Gpr27  
Gpr45  
Gpr62  
Gps1  
Gramd4  
Grasp  
Grb10  
Grid1  
Grid2  
Grip1  
Grk6  
Grsf1  
Grwd1  
Gsg1l  
Gzmm  
H1fx  
H60b  
Hand2  
Hcn1  
Hcn2  
Hdgf  
Hes1  
Higd1b  
Hip1r  
Hipk1  
Hipk3  
Hira  
Hivep1  
Hmgb2  
Hmx1  
Homer2  
Hook1  
Hoxa4  
Hoxa5  
Hoxd1  
Hoxd10  
Hoxd11  
Hoxd12

Hoxd13  
Hoxd3  
Hoxd4  
Hoxd8  
Hoxd9  
Hp1bp3  
Hras1  
Hrk  
Hs6st1  
Htr7  
Hunk  
Ica1l  
Ifngr1  
Igdcc3  
Igf2  
Igf2as  
Igf2bp2  
Igf2r  
Igfbp3  
Igsf11  
Ikzf1  
Ikzf2  
Ikzf3  
Ildr2  
Ina  
Ing1  
Inhbb  
Ino80d  
Inpp5f  
Insm1  
Ipo5  
Irak-M  
Irak3  
Irs2  
Irx2  
Irx4  
Itga9  
Itgb5  
Itsn1  
Jak2  
Jdp2  
Jhdm1d  
JSAP2  
Kbtbd2  
Kcna1  
Kcna2  
Kcna3  
Kcnd2  
Kcnd3

Kcng3  
Kcnh2  
Kcnip1  
Kcnk12  
Kcnk3  
Kcnk9  
Kcnmb4  
Kcnq2  
Kcnq3  
Kcnq4  
Kcnq5  
Kcns1  
Kctd2  
Kctd21  
Kctd6  
Kdm2b  
Khsrp  
Kiaa1432  
Kiaa1841  
Kif17  
Kif27  
Kif2a  
Kifc2  
Kirrel2  
Klf14  
Klf15  
Klhl2  
Klhl22  
Klhl23  
Klhl35  
Kpna3  
Kras  
Krtcap3  
L3mbtl  
Lag3  
Larp1b  
Lcor  
Lemd2  
Lgi2  
Lhx8  
Lifr  
Limd1  
Limd2  
Lin28b  
Lmo1  
Lmx1b  
Lpgat1  
Lrp12  
Lrp3

Lrp6  
Lrp8  
Lrrc3b  
Lrrc4  
Lrrc56  
Lrrc8b  
Lrrc8c  
Lrrc8d  
Ltbp4  
Luc7l3  
Luzp1  
Lypd6b  
Macrod2  
Maf  
Mafb  
Mafg  
Mal2  
Maml1  
Man1a  
Man1a2  
Man2a2  
Maneal  
Manf  
Map3k5  
Map3k9  
Map4k3  
Mapk13  
Mapk1ip1  
Mapk4  
Mapk8ip1  
Mapkapk5  
Marcks  
Marveld1  
Matn4  
Mbd2  
Me1  
Med12l  
Med21  
Mex3c  
mFLJ00022  
Mga  
Mgat3  
Mgat4a  
Mgat4b  
Mier2  
Mif4gd  
Mir1247  
Mir181c  
Mir181d



Mir1956  
Mir1967  
mKIAA0044  
mKIAA0133  
mKIAA0137  
mKIAA0184  
mKIAA0452  
mKIAA0634  
mKIAA0769  
mKIAA1286  
mKIAA1306  
mKIAA1629  
mKIAA1841  
mKIAA1971  
Mll1  
mlr2  
Mlst8  
MMET-1  
Mmgt2  
Mogs  
Mpp6  
Mprp  
Mrpl40  
Mrpl53  
Ms4a8a  
Msi1  
Mta3  
Mtap2  
Mtap7  
Mtap7d1  
Mtss1l  
Myadml2  
Myb  
Mylpf  
Myo5b  
Myo7a  
Myrip  
N28178  
Naa30  
Nacc2  
Nanos3  
Nat8l  
Nbea  
Ncam2  
Nck2  
Ncor2  
Ncs1  
Nek6  
Nell2

Neto1  
Neto2  
Neurabin  
Neur11a  
Nfil3  
Nfyb  
Nhlh1  
Ninj1  
Nipa1  
Nipal1  
Nkain2  
Nkd1  
Nkx2-1  
Nkx2-4  
Nob1  
Noxo1  
Npas1  
Npas2  
Npb  
Npepl1  
Npepps  
Nphs2  
Npnt  
Nr2c2  
Nr2f1  
Nr2f2  
Nr2f6  
Nr4a2  
Nr5a1  
Nras  
Nrbp1  
Nrf1  
Nrg2  
Nrg3  
Nsmaf  
Nt5c2  
Nup35  
O/E-4S  
Ogfr1  
Olfm1  
Olf822  
Olig2  
Onecut2  
ORF61  
Otud7a  
Otx1  
Panx2  
Papd5  
Pappa

Paqr9  
Pard6b  
Pax1  
Pbrm1  
Pbx1  
Pbx3  
Pcbp1  
Pcbp4  
Pcdha1  
Pcsk2  
Pcsk6  
Pde3b  
Pde7a  
Pde8a  
Pdgfc  
Pdgrb  
Pdia2  
Pds5a  
Pdxp  
Peg12  
Pex5l  
Pex7  
Pgp  
Phc1  
Phc2  
Phf17  
Phlpp1  
Phox2b  
Phtf2  
Pik3cb  
Pip4k2a  
Pitpnm3  
Pkdcc  
Pkdrej  
Plag1  
Plcb3  
Plcl2  
Plekha3  
Plekhm2  
Plekho1  
Plin  
Plin1  
Plxna1  
Plxnc1  
Plxnd1  
Podxl2  
Pogk  
Pogz  
Pou3f1

Pou3f3  
Pparg  
Ppfia1  
Ppp1r14b  
Ppp1r9a  
Ppp2cb  
Ppp2r2c  
Ppp2r2d  
Ppp2r5c  
Ppp6r2  
Prdm10  
Prdm11  
Prdm13  
Prima1  
Prkaa1  
Prkar1b  
Prkar2a  
Prkcb  
Prkce  
Prkrir  
Prmt8  
Prr16  
Prrc2b  
Prss41  
Psd  
Psme4  
Ptgfrn  
Ptk2  
Ptms  
Ptp4a2  
Ptp4a3  
Ptpn6  
Ptpn7  
Ptprd  
Ptprt  
Purg  
Pvrl3  
Pvk  
Pycr1  
Pygo1  
Qser1  
Rab11fip4  
Rab11fip5  
Rab12  
Rab15  
Rab21  
Rab35  
Rab3ip  
Rad1

radical-fringe

Raet1a

Raet1e

Ralgapb

Ralgps2

Raly1

RANK

Rap2a

Rapgef4

Rasa2

Rasgef1c

Rasgrp2

Rasl10b

Rb1

Rbm15b

Rbm24

Rbms1

Rbp3

Rbpjl

Rbpms

Rbpms2

Rcor1

Reep1

Reln

Reps1

Rev1

Rfng

Rfwd2

Rgs11

Rhou

Rictor

Rimk1a

Rims1

Rims2

Rims4

Riok2

Rmnd5a

Rnf130

Rnf139

Rnf146

Rnf157

Rnf165

Rnf180

Rnf208

Rnpepl1

Rock2

Rrbp1

Rspo1

Rtn-1A

Rtn1  
Rtn4r  
Runx3  
Ryk  
Ryr2  
Sall1  
Sall3  
Samd5  
Sap30l  
Satb1  
Sbk1  
Scmh1  
Scn10a  
Scrib  
Sdk2  
SEPT3  
SEPT5  
Sertad4  
Sestd1  
Set  
sgigsf  
Sh3gl3  
Sh3glb2  
Shank3  
Shc3  
Shisa9  
Shoc2  
Siah1a  
Sik1  
Sirpa  
Sirt1  
Six2  
Six3  
Six3os1  
Skor1  
Slc12a2  
Slc20a2  
Slc23a2  
Slc25a41  
Slc30a1  
Slc30a4  
Slc35d1  
Slc35e1  
Slc44a1  
Slc6a11  
Slk  
Smad2  
Smad4  
Smad5

Smad1  
Smadcc2  
Smurf1  
Sncap  
Snord12  
Snrk  
Snx24  
Snx9  
Sorcs1  
Sorl1  
Sort1  
Sos1  
Sox1  
Sox12  
Sox2  
Sox21  
Sox30  
Spag9  
Spast  
Spats2  
Spef1  
Spin1  
Sspb3  
Sspb4  
Spns2  
Sppl3  
Spred1  
Spry1  
Src  
Srsf6  
Stk24  
Strbp  
Stxbp5  
Suhw4  
Sumo2  
Susd4  
Syde2  
Synrg  
Syt10  
Syt16  
Syt7  
Syt9  
Tac2  
Tacc1  
Taf5l  
Tbc1d10b  
Tbk1  
Tbkbp1  
Tbr1

Tbrg3  
Tbx2  
Tcap  
Tceb2  
Tcerg1l  
Tcf4  
Tcf7  
Tcfap2e  
Tdrd5  
Tead1  
Tesk1  
Tfdp1  
Tgfbrap1  
Thap1  
Thoc4  
Thoc7  
Tle1  
Tle4  
Tlk1  
Tm7sf3  
Tmbim4  
Tmcc2  
Tmem117  
Tmem121  
Tmem132c  
Tmem132d  
Tmem151a  
Tmem189  
Tmem20  
Tmem200b  
Tmem60  
Tmtc1  
Tmub1  
Tnfrsf11a  
Tnp01  
Tox3  
Trabd  
Traf3  
Trappc10  
Trim41  
Trim44  
Trim7  
Trmt12  
Trpc3  
Tspan5  
Ttbk1  
Ttc34  
Ttc39a  
Tub



Txndc2  
Ube2d2b  
Ube2d3  
Ube2e1  
Ube2e2  
Ube2e3  
Ube2m  
Ubl3  
Ubn2  
Ubqln1  
Ubr5  
Ugcg  
Unc5a  
Unc5d  
Unc80  
Urb2  
Usp12  
Usp24  
Usp3  
Usp31  
Usp35  
Usp46  
Vegfc  
vesl-2  
Vmn1r188  
Vmn1r90  
Vstm2b  
Vstm2l  
Wasf3  
Wdfy3  
Wfdc3  
Whamm  
Wnt5b  
Wnt7b  
Wnt9a  
Wrn  
Wscd1  
Wt1  
Wwp2  
Xkr4  
YAF2  
Ybx1  
Ybx2  
Yif1a  
Ypel5  
Zbed4  
Zbtb17  
Zbtb39  
Zbtb46

Zbtb8a  
Zc3h12c  
Zc3h18  
Zc3h6  
Zdhhc18  
Zdhhc23  
Zeb1  
Zfp161  
Zfp280d  
Zfp281  
Zfp282  
Zfp318  
Zfp319  
Zfp365  
Zfp385b  
Zfp407  
Zfp422  
Zfp423  
Zfp532  
Zfp592  
Zfp598  
Zfp740  
Zfp746  
Zfp804a  
Zic2  
Zic5  
Zmynd19  
Znf280d  
Znf512b  
Znfx1  
Zswim5  
Zzz3

**iMF2**

0610010F05Rik  
1110006O24Rik  
1110059E24Rik  
1500012F01Rik  
1600002K03Rik  
1600014C23Rik  
1600021P15Rik  
1700019N12Rik  
1700109F18Rik  
1810041L15Rik  
2010300C02Rik  
2410004B18Rik  
2610017I09Rik  
2700081O15Rik  
2900092D14Rik  
3830408C21Rik  
4921515J06Rik  
4930488L21Rik  
4930539J05Rik  
5031439G07Rik  
5930412G12Rik  
9330171B17Rik  
9430021M05Rik  
9430083A17Rik  
9930021D14Rik  
A030009H04Rik  
A230083G16Rik  
A730018C14Rik  
AA415398  
AA960436  
Aard  
Accn1  
Acvr1b  
Acvr2a  
Acvr2b  
Adamts20  
Adap1  
Adcy2  
Adcy5  
Adra1b  
Adra2c  
Adrb1  
Adrbk2  
Aff3  
Agap1  
Agpat3  
AI316807  
Aig1

Ajap1

AK005214

AK005503

AK006001

AK007571

AK007998

AK009335

AK010870

AK011568

AK013046

AK014224

AK015004

AK015492

AK016097

AK016591

AK016734

AK016788

AK017177

AK017779

AK019514

AK019838

AK031498

AK035754

AK035982

AK037260

AK038079

AK039014

AK039268

AK039417

AK039608

AK040320

AK041531

AK043607

AK045070

AK047558

AK048292

AK052909

AK053193

AK075633

AK076706

AK080278

AK080292

AK081497

AK084517

AK085371

AK085522

AK132723

AK133391

AK135560

AK140072  
AK142074  
AK144823  
AK145301  
AK147796  
AK148461  
AK149188  
AK158619  
AK161590  
AK162774  
AK162942  
AK163103  
AK163532  
AK166060  
AK190497  
AK191498  
AK197782  
AK211336  
AK216824  
Ak5  
Akap7  
Akd2  
Aktip  
Aldh1a2  
Amfr  
Amigo1  
Amigo2  
Anapc11  
Ank  
Ankmy1  
Ankrd13b  
Ankrd40  
Ankrd52  
Anp32b  
Apba2  
Aqp5  
Arap2  
Arglu1  
Arhgap20  
Arhgap21  
Arhgap23  
Arhgdia  
Arhgdib  
Arhgdig  
Arhgef10l  
Arhgef11  
Arhgef16  
Arid4a  
Arl8a

asp3  
Aspax1  
Asphd2  
Asth2  
Asxl1  
Atf1  
Atl2  
Atn1  
Atoh7  
Atp5h  
Atp6v0b  
Atxn7  
Aurkaip1  
AW555464  
Axin1  
B3gat1  
B830017H08Rik  
B930041F14Rik  
Bai3  
Banp  
Bara  
Barhl2  
Barx1  
Bbip1  
BC027696  
BC029726  
BC035532  
BC046404  
BC053974  
BC060302  
BC062820  
BC070425  
BC099561  
Bcap29  
Bcl2  
Bcng-1  
Bcr  
Bend4  
Bend6  
Bend7  
Bfsp1  
Blvrb  
Bmp2k  
Bnc1  
Boll  
Bpag1  
Brix1  
Brpf3  
Brsk2

Btbd7  
Bves  
Bzw1  
C130074G19Rik  
C1galt1  
C1ql1  
C1qtnf4  
Cables2  
Cabp7  
Cacna1c  
Cacna2d3  
Cacng4  
Cadps  
Cadps2  
cAMP-GEFII  
Camsap1  
Camta1  
Car15  
Car5a  
Casd1  
Caskin1  
Cbx2  
Ccdc6  
Ccne2  
Ccnyl1  
Cd44  
Cdc25b  
Cdc34  
Cdc42bpa  
Cdc42bpb  
Cdc42ep1  
Cdc73  
Cdcrel-1  
Cdh4  
Cdk14  
Cdk5r1  
Cdk8  
Cds1  
Cdv3  
Cdx1  
Celf2  
Celf4  
Celsr1  
Cenpb  
Chad  
Chchd7  
Chd3  
Chd5  
Chmp2a

Chn1  
Chpt1  
Chst2  
Ckap4  
Cldn15  
Clip4  
Clmn  
Clstn1  
Cnga1  
Cnn2  
Cnnm3  
Cnnm4  
Cobl  
Col23a1  
Coro2a  
Crls1  
Cryzl1  
Csad  
Csda  
Csnk1e  
Csnk1g2  
Csnk1g3  
Cst9  
Ctbp1  
Ctnnb1  
Ctnnd2  
Cuedc1  
Cyhr1  
D17Wsu92e  
D430050G20  
Dazl  
Dcbl2  
Dcun1d1  
Dennd1b  
Dennd5a  
Dgkh  
Dio3  
Dio3os  
Dlgap3  
Dmwd  
Dmxl2  
Dnajc21  
Dnttip1  
Doc2b  
Dock5  
Dph2  
Drd2  
Dscam  
Dtnb



Dtnbp1  
Dusp28  
Dusp7  
Dusp8  
Dvl1  
E130018O15Rik  
E130203B14Rik  
Ebf3  
Ebf4  
Edr2 p36  
Efna2  
EG629133  
Eid2  
Eif2c4  
Eif4e  
Eif4e2  
Eif4enif1  
Eif4g1  
Eif4h  
Elfn1  
Elovl2  
Emzf1  
En2  
Epc1  
Eps8  
Erbb2ip  
Esrra  
Evi5  
Evl  
Evx1  
Evx2  
Exoc3l2  
Ext1  
FAK  
Fam102b  
Fam108b  
Fam108b1  
Fam108c  
Fam113b  
Fam125b  
Fam184a  
Fam190a  
Fam19a5  
Fam69a  
Fam73b  
Fancf  
Fastk  
Fbl1  
Fbrsl1

Fbxl15  
Fbxl17  
Fbxl3  
Fcho2  
Fchsd2  
Fermt2  
Fgf8  
Fign  
Fis1  
Fkbp5  
Fkbp7  
Fndc5  
Foxa1  
Foxd1  
Foxe1  
Foxj3  
Foxk1  
Fsd2  
Ftl2  
Fzd10  
Gab2  
Gal3st1  
Gas2  
Gatad2a  
Gbx1  
Gdf7  
Gfer  
Gjc1  
Glcci1  
Glis1  
Gm10638  
Gm13375  
Gm4983  
Gm527  
Gm5577  
Gm757  
Gmeb2  
Gna12  
Gnao1  
Gnl3  
Gpc1  
Gpr182  
Gpr27  
Gpr85  
Gps1  
Gramd4  
Grasp  
Grb10  
Grid1

Grip1  
Grk6  
Grsf1  
Grwd1  
Gzmm  
H1fx  
H60b  
Hand2  
Hcn1  
Hcn2  
Hdgf  
Hes1  
Higd1b  
Hipk1  
Hipk2  
Hipk3  
Hivep1  
Hmx1  
Homer2  
Hoxa4  
Hoxb2  
Hoxd11  
Hoxd13  
Hoxd3  
Hoxd4  
Hoxd8  
Hoxd9  
Hp1bp3  
Hras1  
Hrk  
Hs6st1  
Htr7  
Ica1l  
Igf2  
Igf2as  
Igf2r  
Ikzf1  
Ildr2  
Inca1  
Inhbb  
Insm1  
Ipo5  
Irak-M  
Irak3  
Irx2  
Itga9  
Itsn1  
Jak2  
Jhdm1d

JSAP2  
Kbtbd2  
Kcna2  
Kcnd2  
Kcne4  
Kcng3  
Kcnk3  
Kcnk9  
Kcnmb4  
Kcnq2  
Kcnq4  
Kcns1  
Kctd2  
Kctd21  
Kctd6  
Kdm2b  
Khdc1a  
Khdc1c  
Khsrp  
Kiaa1841  
Kif1c  
Kif2a  
Kifc2  
Klf14  
Klf15  
Klhl2  
Klhl23  
Klhl35  
Klrb1b  
Klrb1c  
Klrb1f  
Kpna3  
Kras  
Kremen1  
Krtcap3  
Lag3  
Larp1b  
Lcor  
Lemd2  
Lgi2  
Lhx8  
Lifr  
Limd2  
Lin28b  
Lin9  
Lmo1  
Lmx1b  
Lpgat1  
Lrfn1

Lrp12  
Lrp3  
Lrp8  
Lrrc4  
Lrrc56  
Lrrc8b  
Lrrc8c  
Ltbp4  
Luc7l3  
Luzp1  
MacroD2  
Mafg  
Maml1  
Man1a2  
Man2a2  
Maneal  
Manf  
Map3k5  
Map3k9  
Map4k3  
Map4k4  
Mapk1ip1  
Mapk8ip1  
Mapkapk5  
Marcks  
Marveld1  
Matn4  
Me1  
Med21  
Mex3c  
mFLJ00022  
Mga  
Mgat3  
Mgat4a  
Mgat4b  
Mier2  
Mif4gd  
Mir1247  
Mir181c  
Mir181d  
Mir1956  
Mir1967  
mKIAA0044  
mKIAA0133  
mKIAA0137  
mKIAA0452  
mKIAA0634  
mKIAA0769  
mKIAA1188

mKIAA1306  
mKIAA1841  
mKIAA1994  
mlr2  
Mlst8  
MMET-1  
Mmgt2  
Mogs  
Mphosph9  
Mpp6  
Mprp  
Mrpl53  
Msi1  
Mtap7  
Mtss1l  
Mxra8  
Myadml2  
Myb  
Mylpf  
Myo1a  
Myo5b  
Myo7a  
Myrip  
N28178  
Naa30  
Nacc2  
Nanos3  
Nat8l  
Nbea  
Ncam2  
Nck2  
Ncor2  
Ncs1  
Nek6  
Neurabin  
Nfil3  
Nfyb  
Nhlh1  
Ninj1  
Nipa1  
Nipal1  
Nkd1  
Nob1  
Noxo1  
Npb  
Npepps  
Npnt  
Nptxr  
Nr2c2

Nr2f2  
Nr2f6  
Nr4a2  
Nr5a1  
Nras  
Nrbp1  
Nrf1  
Nrg3  
Nsmf  
O/E-4S  
Ogfr1  
Olfm1  
Olf822  
Onecut2  
ORF61  
Otd7a  
Otx1  
Papd5  
Pappa  
Paqr9  
Pax1  
Pbrm1  
Pbx1  
Pbx3  
Pcbp1  
Pcdha1  
Pcnx  
Pcsk2  
Pcsk6  
Pde7a  
Pde8a  
Pdia2  
Pds5a  
Peg12  
Peli2  
Pex5l  
Pex7  
Pgp  
Phc2  
Phf13  
Phf17  
Phlpp1  
Phtf2  
Pik3cb  
Pitpnm3  
Pkdcc  
Plag1  
Plcb3  
Plcl2

Plekha3  
Plekhm2  
Plekho1  
Plin  
Plin1  
Plxna1  
Plxnc1  
Plxnd1  
Podxl2  
Pogz  
Pomgnt1  
Pou3f3  
Pparg  
Ppfia1  
Ppp1r14b  
Ppp1r9a  
Ppp2cb  
Ppp2r2c  
Ppp2r2d  
Ppp2r5c  
Ppp6r2  
Prima1  
Prkar1b  
Prkar2a  
Prkcb  
Prkce  
Prkri  
Prkrir  
Prmt8  
Prrc2b  
Psd  
Psme4  
Ptgfrn  
Ptk2  
Ptms  
Ptp4a2  
Ptp4a3  
Ptpn7  
Ptprd  
Ptprt  
Purg  
Pvrl3  
Pvk  
Pycr1  
Pygo1  
Qser1  
Rab11fip4  
Rab11fip5  
Rab12  
Rab21



Rab35  
Rab3ip  
Rac3  
Rad1  
radical-fringe  
Raet1a  
Raet1e  
Ralgps2  
RANK  
Rap2a  
Rapgef4  
Rasgef1c  
Rasl10b  
Rb1  
Rbm15b  
Rbm24  
Rbms1  
Rbp3  
Rbpjl  
Rbpms  
Rbpms2  
Reln  
Reps1  
Rest  
Rev1  
Rfng  
Rfwd2  
Rgs11  
Rgs2  
Rhou  
Rictor  
Rims1  
Rims4  
Rmnd5a  
Rnf130  
Rnf157  
Rnf165  
Rnpepl1  
Rock2  
Rrbp1  
Rtn4r  
Runx3  
Ryk  
Sall3  
Sap30l  
Sbk1  
Scmh1  
Scn10a  
Scrib

SEPT3  
SEPT5  
Sertad4  
Sestd1  
Sh3gl3  
Sh3glb2  
Shoc2  
Siah1a  
Sik1  
Sirpa  
Sirt1  
Six2  
Slc12a2  
Slc20a2  
Slc23a2  
Slc25a41  
Slc30a4  
Slc35d1  
Slc35e1  
Slc44a1  
Slc6a11  
Slk  
Smad2  
Smad4  
Smad5  
Smad1  
Smarcc2  
Snord12  
Snrk  
Snx24  
Snx9  
Sorl1  
Sos1  
Sox12  
Sox2  
Sox30  
Spag9  
Spast  
Spats2  
Spef1  
Spen  
Spin1  
Sspb3  
Sspb4  
Spns2  
Sppl3  
Spred1  
Spry1  
Src

Srxn1  
Stk24  
Strbp  
Suhw4  
Sumo2  
SUSD4  
Synrg  
Syt16  
Syt7  
Syt9  
Tac2  
Tacc1  
Taf5l  
Tbc1d10b  
Tbk1  
Tbkbp1  
Tbr1  
Tbrg3  
Tbx2  
Tbxas1  
Tcap  
Tceb2  
Tcerg1l  
Tcf4  
Tcf7  
Tcfap2e  
Tead1  
Tesk1  
Tfdp1  
Tgfbrap1  
Thap1  
Thoc4  
Thoc7  
Tle1  
Tle4  
Tlk1  
Tm7sf3  
Tmbim4  
Tmcc2  
Tmem117  
Tmem132d  
Tmem151a  
Tmem189  
Tmem20  
Tmem200b  
Tmem60  
Tmtc1  
Tmub1  
Tnfrsf11a

Tnpo1  
Tox3  
Trabd  
Traf3  
Trappc10  
Trim41  
Trim44  
Trim7  
Trmt12  
Tsc22d1  
Tspan5  
Ttbk1  
Ttc34  
Ttc39a  
Tub  
Ube2d2b  
Ube2d3  
Ube2e1  
Ube2e2  
Ube2e3  
Ube2m  
Ubn2  
Ubp1  
Ubr5  
Ugcg  
Unc5a  
Urb2  
Usp12  
Usp24  
Usp3  
Usp31  
Usp33  
Usp35  
Usp46  
Vapa  
Vdu1  
Vegfc  
vesl-2  
Vmn1r188  
Vmn1r90  
Vstm2l  
Wbp1  
Wfdc3  
Wnt5b  
Wnt9a  
Wrn  
Wwp2  
Xkr4  
YAF2

Ybx1  
Yif1a  
Ypel5  
Zbed4  
Zbtb17  
Zbtb39  
Zbtb46  
Zbtb8a  
Zc3h18  
Zc3h6  
Zdhhc18  
Zdhhc23  
Zeb1  
Zfp12  
Zfp161  
Zfp238  
Zfp280d  
Zfp281  
Zfp282  
Zfp318  
Zfp319  
Zfp407  
Zfp592  
Zfp598  
Zfp740  
Zfp746  
Zfp800  
Zmynd19  
Znf280d  
Znf512b  
Znfx1  
Znrf2  
Zswim5  
Zzz3

## **Fibroblast all intersect**

0610010F05Rik  
1110006O24Rik  
1110059E24Rik  
1500012F01Rik  
1600002K03Rik  
1600021P15Rik  
1700019N12Rik  
1700109F18Rik  
1810041L15Rik  
2010300C02Rik  
2410004B18Rik  
2610017I09Rik  
2700081O15Rik  
2900092D14Rik  
3830408C21Rik  
4930488L21Rik  
4930539J05Rik  
5031439G07Rik  
5930412G12Rik  
9330171B17Rik  
9430021M05Rik  
9430083A17Rik  
A030009H04Rik  
A230083G16Rik  
Aard  
Accn1  
Acvr1b  
Acvr2a  
Acvr2b  
Adamts20  
Adap1  
Adcy2  
Adcy5  
Adra2c  
Adrb1  
Adrbk2  
Aff3  
Agap1  
Agpat3  
AI316807  
Aig1  
Ajap1  
AK005214  
AK005503  
AK006001  
AK007571  
AK009335  
AK010870

AK011568  
AK013046  
AK014224  
AK015004  
AK015492  
AK016097  
AK016591  
AK016788  
AK017177  
AK017779  
AK019514  
AK019838  
AK031498  
AK035754  
AK035982  
AK037260  
AK038079  
AK039014  
AK039268  
AK039417  
AK039608  
AK040320  
AK041531  
AK043607  
AK045070  
AK047558  
AK048292  
AK075633  
AK076706  
AK080278  
AK080292  
AK081497  
AK084517  
AK085371  
AK085522  
AK132723  
AK133391  
AK135560  
AK140072  
AK142074  
AK144823  
AK145301  
AK147796  
AK148461  
AK149188  
AK158619  
AK161590  
AK162774  
AK163532

AK166060  
AK190497  
AK191498  
AK197782  
AK211336  
Ak5  
Akd2  
Aldh1a2  
Amfr  
Amigo1  
Amigo2  
Anapc11  
Ank  
Ankrd13b  
Ankrd52  
Anp32b  
Apba2  
Aqp5  
Arap2  
Arglu1  
Arhgap20  
Arhgap21  
Arhgap23  
Arhgdia  
Arhgdig  
Arhgef10l  
Arhgef11  
Arid4a  
Arl8a  
asp3  
Aspax1  
Asphd2  
Astn2  
Asxl1  
Atf1  
Atl2  
Atn1  
Atoh7  
Atp5h  
Atxn7  
AW555464  
B3gat1  
B830017H08Rik  
B930041F14Rik  
Bai3  
Banp  
Barhl2  
Barx1  
Bbip1



BC027696  
BC029726  
BC035532  
BC046404  
BC053974  
BC060302  
BC062820  
BC070425  
BC099561  
Bcap29  
Bcl2  
Bcng-1  
Bcr  
Bend4  
Bend6  
Bend7  
Bfsp1  
Blvrb  
Bmp2k  
Bnc1  
Boll  
Bpag1  
Brix1  
Brsk2  
Btbd7  
Bves  
Bzw1  
C1galt1  
C1ql1  
C1qtnf4  
Cables2  
Cabp7  
Cacna2d3  
Cacng4  
Cadps  
Cadps2  
cAMP-GEFII  
Camsap1  
Car15  
Car5a  
Caskin1  
Cbx2  
Ccdc6  
Ccne2  
Ccnyl1  
Cdc34  
Cdc42bpa  
Cdc42bpb  
Cdc42ep1

Cdc73  
Cdcrel-1  
Cdh4  
Cdk14  
Cdk5r1  
Cdk8  
Cds1  
Cdv3  
Cdx1  
Celf2  
Celf4  
Celsr1  
Chchd7  
Chd3  
Chd5  
Chmp2a  
Chn1  
Chpt1  
Chst2  
Ckap4  
Clip4  
Clstn1  
Cnn2  
Cnnm3  
Cnnm4  
Cobl  
Col23a1  
Coro2a  
Crls1  
Cryz1  
Csad  
Csda  
Csnk1e  
Csnk1g2  
Ctbp1  
Ctnnb1  
Ctnnd2  
Cuedc1  
Cyhr1  
D17Wsu92e  
D430050G20  
Dazl  
Dcblid2  
Dcun1d1  
Dennd5a  
Dio3  
Dio3os  
Dlgap3  
Dmwd

Dmxl2  
Dnajc21  
Dnttip1  
Doc2b  
Dock5  
Drd2  
Dscam  
Dtnb  
Dtnbp1  
Dusp28  
Dusp7  
Dusp8  
Dvl1  
E130018O15Rik  
E130203B14Rik  
Ebf3  
Ebf4  
Edr2 p36  
Efna2  
EG629133  
Eid2  
Eif2c4  
Eif4e  
Eif4e2  
Eif4enif1  
Eif4g1  
Eif4h  
Elfn1  
Elovl2  
Emzf1  
En2  
Epc1  
Erbb2ip  
Esrra  
Evi5  
Evl  
Evx1  
Evx2  
Ext1  
FAK  
Fam102b  
Fam108b  
Fam108b1  
Fam108c  
Fam113b  
Fam125b  
Fam184a  
Fam190a  
Fam19a5

Fam69a  
Fam73b  
Fancf  
Fastk  
Fbl1  
Fbrs1  
Fbx15  
Fbx17  
Fbx3  
Fcho2  
Fermt2  
Fgf8  
Fign  
Fkbp5  
Fkbp7  
Fndc5  
Foxa1  
Foxd1  
Foxe1  
Foxk1  
Fsd2  
Fzd10  
Gab2  
Gal3st1  
Gas2  
Gatad2a  
Gbx1  
Gdf7  
Gfer  
Glcci1  
Glis1  
Gm10638  
Gm13375  
Gm4983  
Gm527  
Gm5577  
Gm757  
Gmeb2  
Gna12  
Gnao1  
Gnl3  
Gpc1  
Gpr27  
Gps1  
Gramd4  
Grasp  
Grb10  
Grid1  
Grip1

Grk6  
Grsf1  
Grwd1  
Gzmm  
H1fx  
Hand2  
Hcn1  
Hcn2  
Hdgf  
Hes1  
Higd1b  
Hipk1  
Hivep1  
Hmx1  
Homer2  
Hoxa4  
Hoxd11  
Hoxd13  
Hoxd3  
Hoxd8  
Hoxd9  
Hp1bp3  
Hras1  
Hrk  
Hs6st1  
Htr7  
Ica1l  
Igf2  
Igf2as  
Igf2r  
Ikzf1  
Ildr2  
Inhbb  
Ipo5  
Irx2  
Itga9  
Itsn1  
Jak2  
Jhdm1d  
JSAP2  
Kbtbd2  
Kcna2  
Kcnd2  
Kcng3  
Kcnk3  
Kcnk9  
Kcnmb4  
Kcnq2  
Kcnq4

Kcns1  
Kctd2  
Kctd21  
Kctd6  
Kdm2b  
Khsrp  
Kiaa1841  
Kif2a  
Kifc2  
Kif14  
Kif15  
Kihl2  
Kihl23  
Kihl35  
Kpna3  
Kras  
Lag3  
Larp1b  
Lcor  
Lemd2  
Lgi2  
Lhx8  
Lifr  
Limd2  
Lin28b  
Lmo1  
Lmx1b  
Lpgat1  
Lrp12  
Lrp3  
Lrp8  
Lrrc4  
Lrrc56  
Lrrc8b  
Lrrc8c  
Ltbp4  
Luzp1  
Macrod2  
Mafg  
Mam11  
Man1a2  
Man2a2  
Maneal  
Manf  
Map3k9  
Map4k3  
Mapk1ip1  
Mapk8ip1  
Mapkapk5

Marcks  
Marveld1  
Matn4  
Me1  
Med21  
Mex3c  
mFLJ00022  
Mgat3  
Mgat4a  
Mgat4b  
Mier2  
Mif4gd  
Mir1247  
Mir181c  
Mir181d  
Mir1956  
mKIAA0044  
mKIAA0133  
mKIAA0137  
mKIAA0452  
mKIAA0634  
mKIAA1306  
mKIAA1841  
mlr2  
MMET-1  
Mmgt2  
Mogs  
Mpp6  
Mprp  
Mrpl53  
Msi1  
Mtap7  
Mtss1l  
Myb  
Mylpf  
Myo5b  
Myrip  
N28178  
Naa30  
Nacc2  
Nanos3  
Nat8l  
Nbea  
Ncam2  
Nck2  
Ncor2  
Ncs1  
Nek6  
Neurabin

Nfil3  
Nfyb  
Nipa1  
Nkd1  
Nob1  
Noxo1  
Npb  
Npepps  
Npnt  
Nr2f2  
Nr2f6  
Nr4a2  
Nr5a1  
Nras  
Nrbp1  
Nsmaf  
O/E-4S  
Ogfr1  
Olfm1  
Onecut2  
ORF61  
Otud7a  
Otx1  
Papd5  
Pappa  
Paqr9  
Pax1  
Pbrm1  
Pbx1  
Pbx3  
Pcbp1  
Pcsk2  
Pcsk6  
Pde7a  
Pde8a  
Pdia2  
Pds5a  
Peg12  
Pex5l  
Phc2  
Phf17  
Phlpp1  
Phtf2  
Pik3cb  
Pitpnm3  
Pkdcc  
Plag1  
Plcb3  
Plcl2



Plekha3  
Plekhm2  
Plekho1  
Plxna1  
Plxnc1  
Plxnd1  
Podxl2  
Pou3f3  
Ppfa1  
Ppp1r14b  
Ppp1r9a  
Ppp2cb  
Ppp2r2c  
Ppp2r2d  
Ppp2r5c  
Ppp6r2  
Prima1  
Prkar1b  
Prkar2a  
Prkcb  
Prkce  
Prmt8  
Prrc2b  
Psd  
Psme4  
Ptgfrn  
Ptk2  
Ptms  
Ptp4a2  
Ptp4a3  
Ptprd  
Ptprt  
Purg  
Pvrl3  
Pvk  
Pycr1  
Pygo1  
Qser1  
Rab11fip4  
Rab11fip5  
Rab12  
Rab21  
Rab35  
Rab3ip  
Rad1  
radical-fringe  
Ralgps2  
RANK  
Rap2a

Rapgef4  
Rasgef1c  
Ras10b  
Rb1  
Rbm15b  
Rbm24  
Rbms1  
Rbpjl  
Rbpms2  
Reln  
Reps1  
Rev1  
Rfng  
Rgs11  
Rhou  
Rims1  
Rims4  
Rmnd5a  
Rnf130  
Rnf157  
Rnf165  
Rnpepl1  
Rock2  
Rrbp1  
Rtn4r  
Runx3  
Ryk  
Sall3  
Sbk1  
Scmh1  
Scn10a  
Scrib  
SEPT3  
SEPT5  
Sertad4  
Sestd1  
Shoc2  
Siah1a  
Sik1  
Sirpa  
Sirt1  
Six2  
Slc20a2  
Slc23a2  
Slc30a4  
Slc35d1  
Slc35e1  
Slc44a1  
Slc6a11

Slk  
Smap1  
Smarcc2  
Snord12  
Snrk  
Snx24  
Snx9  
Sorl1  
Sos1  
Sox12  
Sox2  
Sox30  
Spag9  
Spast  
Spats2  
Spef1  
Spin1  
Sspb3  
Sspb4  
Spns2  
Sppl3  
Spred1  
Src  
Stk24  
Strbp  
Suhw4  
Sumo2  
Susd4  
Synrg  
Syt16  
Syt7  
Syt9  
Tacc1  
Taf5l  
Tbc1d10b  
Tbk1  
Tbkbp1  
Tbr1  
Tbrg3  
Tbx2  
Tcap  
Tceb2  
Tcerg1l  
Tcf7  
Tcfap2e  
Tead1  
Tesk1  
Tfdp1  
Tgfbrap1

Thap1  
Thoc4  
Thoc7  
Tle1  
Tle4  
Tlk1  
Tm7sf3  
Tmcc2  
Tmem117  
Tmem132d  
Tmem151a  
Tmem189  
Tmem20  
Tmem200b  
Tmem60  
Tmtc1  
Tmub1  
Tnfrsf11a  
Tnpo1  
Tox3  
Trabd  
Traf3  
Trappc10  
Trim41  
Trim44  
Trim7  
Tspan5  
Ttbk1  
Ttc34  
Ttc39a  
Tub  
Ube2d2b  
Ube2d3  
Ube2e1  
Ube2e2  
Ube2e3  
Ube2m  
Ubn2  
Ubr5  
Ugcg  
Unc5a  
Usp12  
Usp24  
Usp3  
Usp31  
Usp35  
Usp46  
Vegfc  
vesl-2

Vmn1r90  
Vstm2l  
Wfdc3  
Wnt5b  
Wnt9a  
Wrn  
Wwp2  
Xkr4  
Ybx1  
Yif1a  
Ypel5  
Zbed4  
Zbtb17  
Zbtb39  
Zbtb46  
Zbtb8a  
Zc3h18  
Zc3h6  
Zdhhc18  
Zdhhc23  
Zeb1  
Zfp161  
Zfp280d  
Zfp281  
Zfp282  
Zfp318  
Zfp592  
Zfp598  
Zfp740  
Zfp746  
Zmynd19  
Znf280d  
Znf512b  
Znfx1  
Zswim5  
Zzz3

**Table S5.** Primers used in this study.

| <b>Primers for DAMD assay</b>    | <b>Sequence</b>              |
|----------------------------------|------------------------------|
| JW-102gMse                       | GCGGTGACCCGGGAGATCTGAATTGTAA |
| JW-102gMsp                       | GCGGTGACCCGGGAGATCTGAATTGCGG |
| JW-102g                          | GCGGTGACCCGGGAGATCTGAATTG    |
| JW103pcTA                        | [Phos]TACAATTCAGATCTCCCG     |
| JW103pc-2                        | [Phos]CGCAATTCAGATCTCCCG     |
| <b>Primers for bisulfite PCR</b> |                              |
| biEN2_F2                         | GAGGATTTGGTTTTGTTGAATTTTT    |
| biEN2_R2                         | CAAACCTAAAATCATTCTCCTCCAT    |
| biHOXA10_F2                      | GGGGTGTTAGTGTTTGGTTATTTT     |
| biHOXA10_R2                      | ACAACCCTCTACAACCCTACTTACC    |
| hsGPR75_F1                       | GGGTTAGGTAAGTTTGTAAGAAGT     |
| hsGPR75_R1                       | ACCTCTAATCCTACATCATCCAAA     |
| hsMIR155HG_F1                    | AGGTTTTAAGAATAGGTAGGAGGGG    |
| hsMIR155HG_R1                    | ACCACTAAATCCCCAAAAACAC       |
| hsTMEM176B_F2                    | TTTGAAATTAGGTTGGAGGAAG       |
| hsTMEM176B_R2                    | TCACTAACTCTAAAAAACTAAAAAATCC |
| hsSALL4_F1                       | GGGAGAGGAGGAGATTTTTTTTT      |
| hsSALL4_R1                       | TAAAATCTTAAACCCAAACCAATCA    |
| mmRik1_F1                        | TTTTTTGAATAGATAGGGTAGGGGT    |
| mmRik1_R1                        | AACCAAATACAAATCAACACAAACC    |
| mmRik2_F1                        | TTGAGTAATGTTGTTAGAGGTTAAGGAA |
| mmRik2_R1                        | AATCCTCTACAAAAAAAACCAAAC     |
| mmVmn1r90_F3                     | AGGATAAATAGTTGGTGGGTGTTAG    |
| mmVmn1r90_R3                     | ACCCAAATCCTACCTTTATCTCCTA    |
| mmbisCdh4_F1                     | GTGGGGTTAGTTGGTGTTTTT        |
| mmbisCdh4_R1                     | ATATATCCAACCTCCAATCCCC       |
| mmbisEvx2_F3                     | AGTTTAGAGGATGAGGTTGGAGTTT    |
| mmbisEvx2_R3                     | TCCACAACCCTACTACTAACAACAAAA  |
